# Supplementary material for: Annotation and cluster analysis of spatiotemporal- and sex-related lncRNA expression in rhesus macaque brain
Source: PubMed Central journal article supplement (PMC5580719; doi:10.1101/gr.217463.116), 2017-09
Supplement: supp_gr.217463.116_Supplemental_Fig_S3.pdf [file supp_gr.217463.116_Supplemental_Fig_S3.pdf]

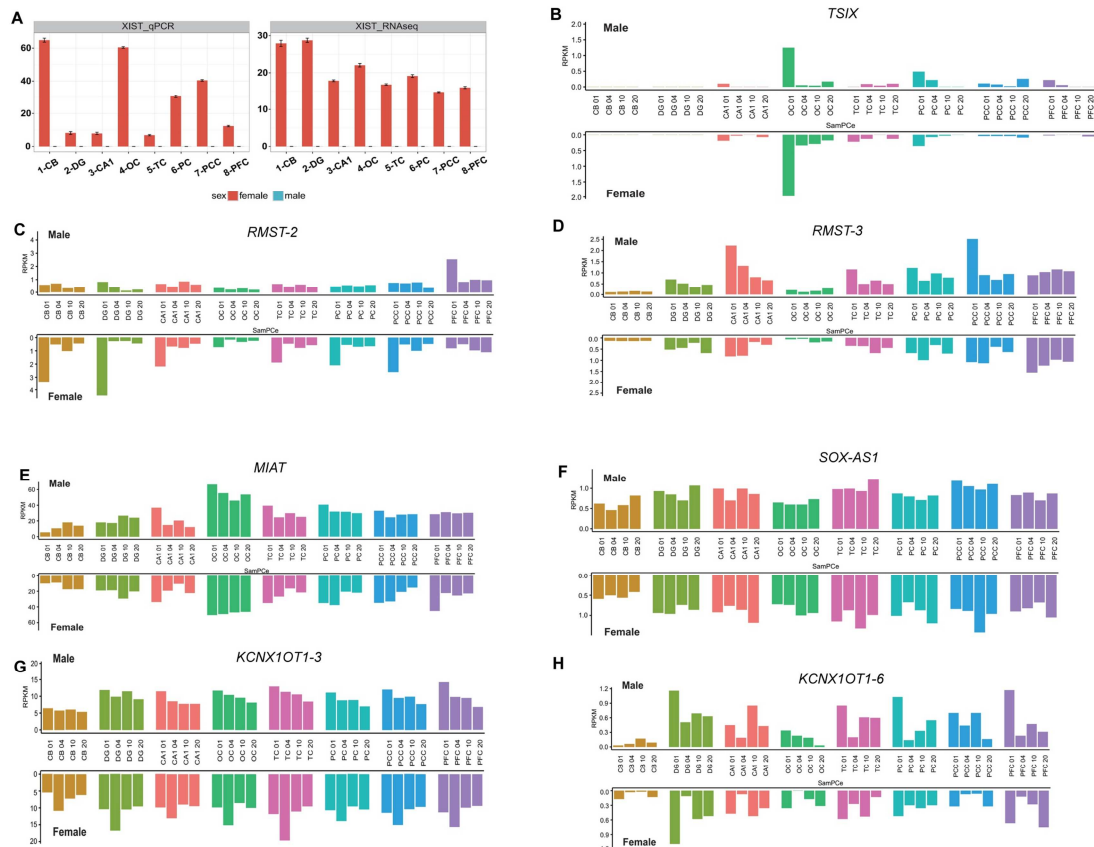

**Supplemental Fig S3. Known lncRNA validation by qPCR and RNA-Seq expression level**

(A) Bar plot of qPCR (left) validation and RNA-Seq (right) of sex-specific lncRNA *XIST*.

(B) Bar plot of RNA-Seq expression level in 64 samples of lncRNA *TSIX*.

(C) Bar plot of RNA-Seq expression level in 64 samples of lncRNA *RMST-2*.

(D) Bar plot of RNA-Seq expression level in 64 samples of lncRNA *RMST-3*.

(E) Bar plot of RNA-Seq expression level in 64 samples of lncRNA *MIAT*.

(F) Bar plot of RNA-Seq expression level in 64 samples of lncRNA *SOX-AS1*.

(G) Bar plot of RNA-Seq expression level in 64 samples of lncRNA *KCNXTOT1-3*.

(H) Bar plot of RNA-Seq expression level in 64 samples of lncRNA *KCNXTOT1-6*.
