# Supplementary material for: Annotation and cluster analysis of spatiotemporal- and sex-related lncRNA expression in rhesus macaque brain
Source: PubMed Central journal article supplement (PMC5580719; doi:10.1101/gr.217463.116), 2017-09
Supplement: supp_gr.217463.116_Supplemental_Fig_S5.pdf [file supp_gr.217463.116_Supplemental_Fig_S5.pdf]

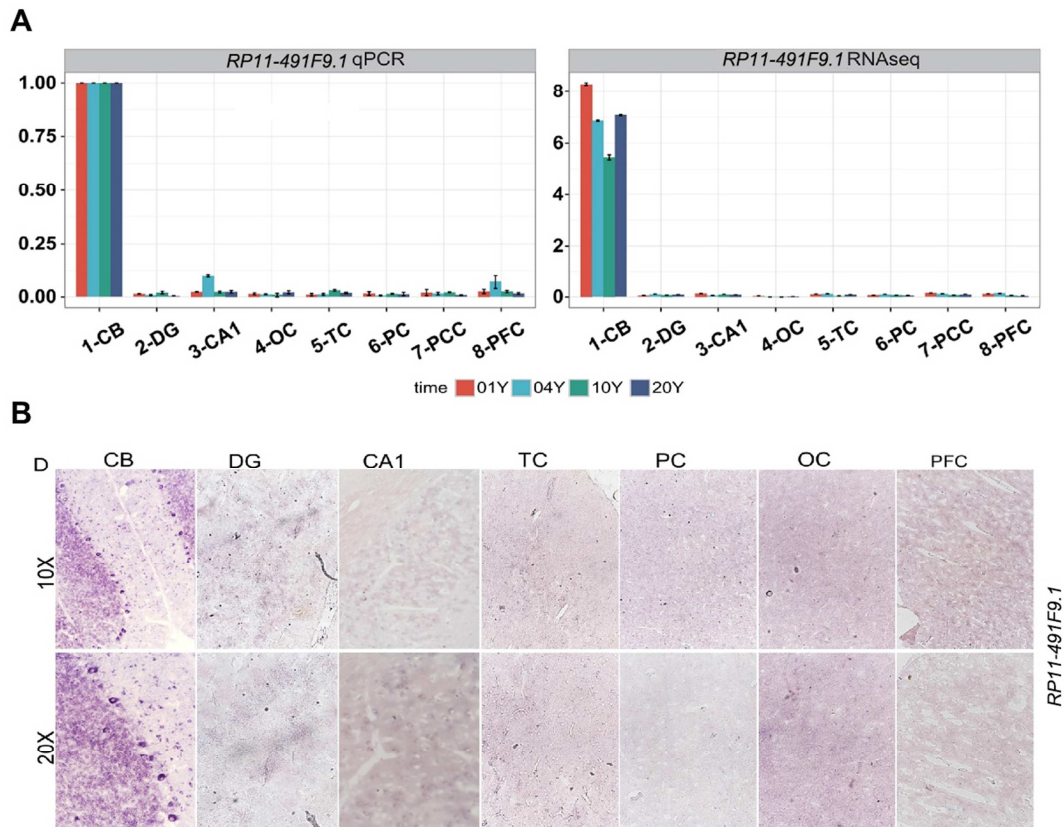

**Supplemental Fig S5. Characteristics of CB-specific lncRNA expression in rhesus monkey brain**

(A) qPCR (left) and RNA-Seq expression (right) validation of a CB-specific lncRNA, *RP11-491F9.1*.

(B) Representative ISH validation of *RP11-491F9.1* in macaque brain with 10x amplification (top) and 20x amplification (bottom). The images are representative of replicates of three independent experiments.
