# Supplementary material for: Annotation and cluster analysis of spatiotemporal- and sex-related lncRNA expression in rhesus macaque brain
Source: PubMed Central journal article supplement (PMC5580719; doi:10.1101/gr.217463.116), 2017-09
Supplement: supp_gr.217463.116_Supplemental_Fig_S8.pdf [file supp_gr.217463.116_Supplemental_Fig_S8.pdf]

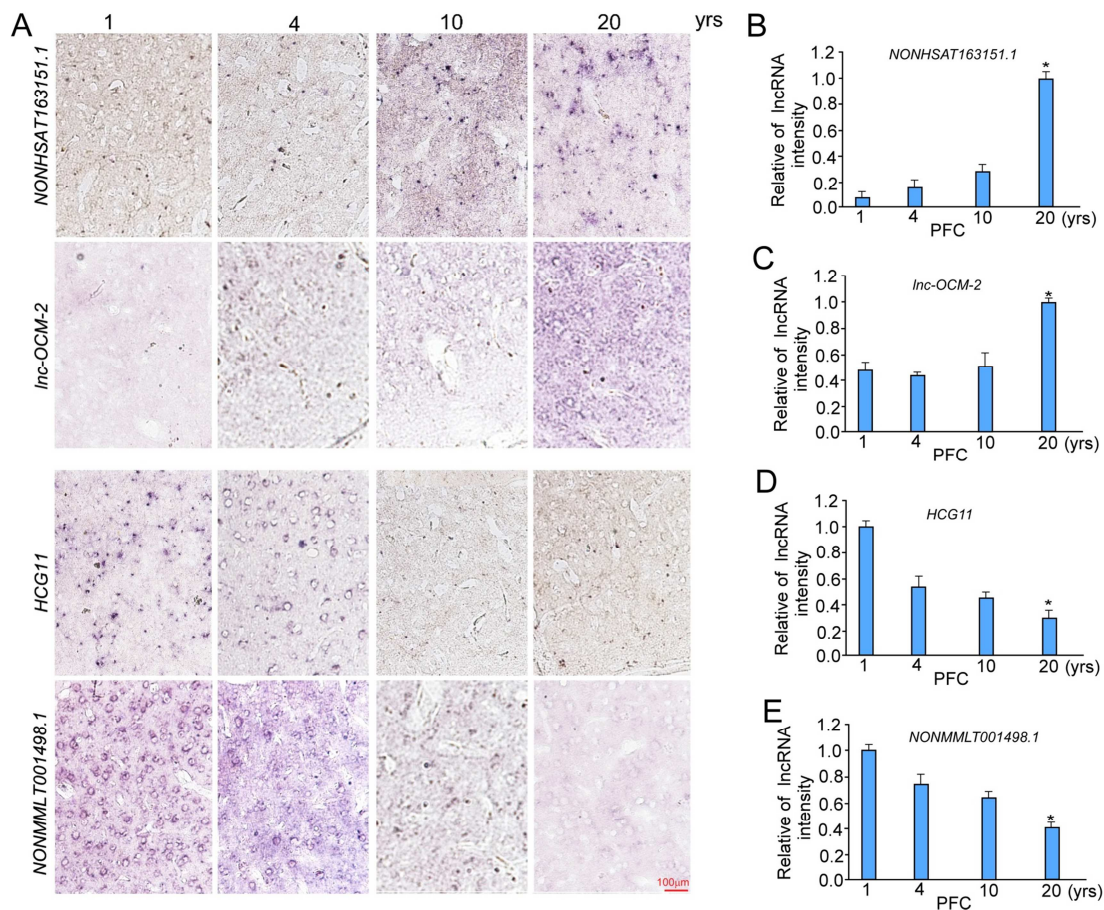

### Supplemental Fig S8. Characteristics of age-related lncRNA expression in the PFC

(A) Representative ISH validation of age-related lncRNAs, *NONHSAT163151.1*, *lnc-OCM-2*, *HCG11*, *NONMMLT001498.1* in PFC across the four ages. The images are representative of replicates of three independent experiments.

(B-E) Relative ISH intensities of age-related lncRNAs, *NONHSAT163151.1*, *lnc-OCM-2*, *HCG11*, *NONMMLT001498.1* illustrated in panel A) were quantified by use of image J software. Data are present as mean  $\pm$  s.e.m. ( $n=18-26$  cells per group). Each bar represents the average of three independent experiments; error bars denote s.e.m. (\*,  $p < 0.05$ , unpaired  $t$  test).
