# Supplementary material for: Annotation and cluster analysis of spatiotemporal- and sex-related lncRNA expression in rhesus macaque brain
Source: PubMed Central journal article supplement (PMC5580719; doi:10.1101/gr.217463.116), 2017-09
Supplement: supp_gr.217463.116_Supplemental_Fig_S10.pdf [file supp_gr.217463.116_Supplemental_Fig_S10.pdf]

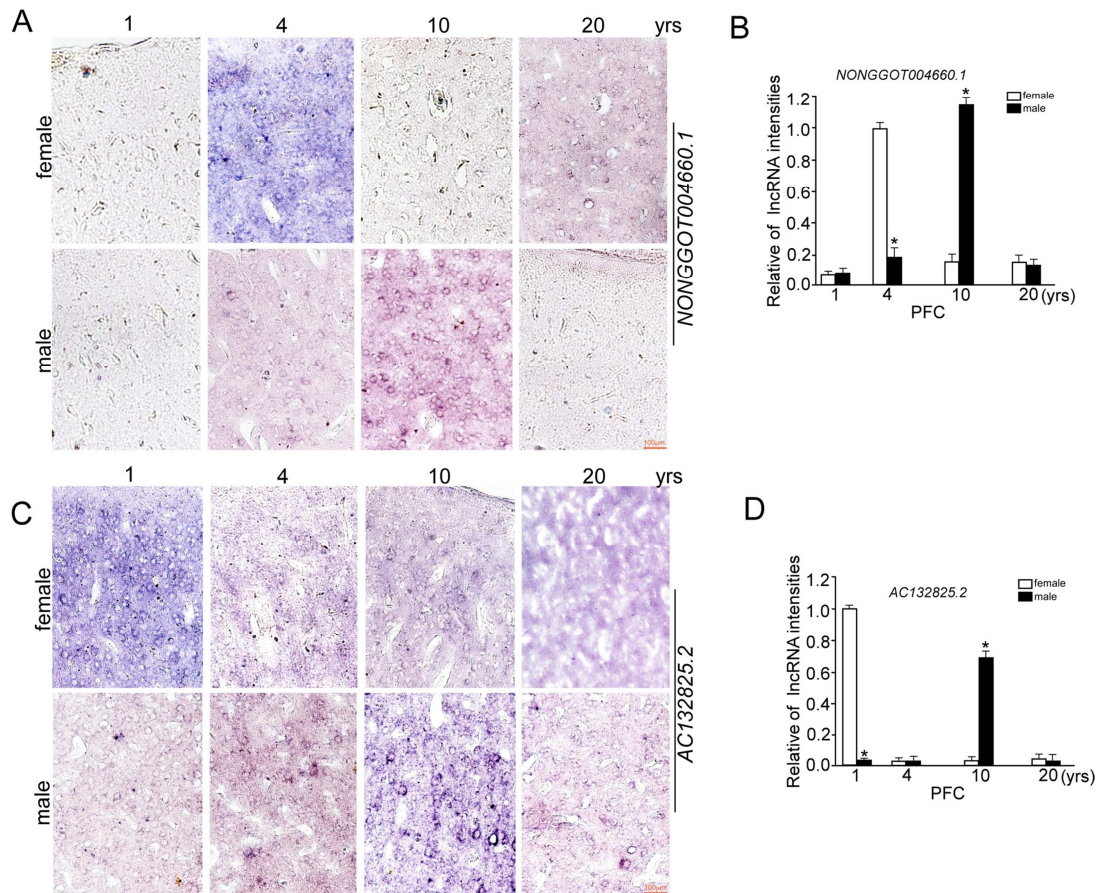

### Supplemental Fig S10. Characteristics of sex- and age-biased lncRNA expression

(A) Representative ISH images of lncRNA *NONGGOT004660.1* expression pattern in female and male PFC across the four ages. The images are representative of replicates of three independent experiments.

(B) Relative ISH intensities of sex- and age-biased lncRNA *NONGGOT004660.1* illustrated in panel A) were quantified by use of image J software. Data are present as mean  $\pm$  s.e.m. ( $n=30-36$  cells per group). Each bar represents the average of three independent experiments; error bars denote s.e.m. (\*,  $p < 0.05$ , unpaired  $t$  test).

(C) Representative ISH images of lncRNA *AC132825.2* expression pattern in female and male PFC across the four ages. The images are representative of replicates of three independent experiments.

(D) Relative ISH intensities of sex- and age-biased lncRNA *AC132825.2* illustrated in panel C) were quantified by use of image J software. Data are present as mean  $\pm$  s.e.m. ( $n=27-33$  cells per group). Each bar represents the average of three independent experiments; error bars denote s.e.m. (\*,  $p < 0.05$ , unpaired  $t$  test).
