# Supplementary material for: Annotation and cluster analysis of spatiotemporal- and sex-related lncRNA expression in rhesus macaque brain
Source: PubMed Central journal article supplement (PMC5580719; doi:10.1101/gr.217463.116), 2017-09
Supplement: supp_gr.217463.116_Supplemental_Fig_S11.pdf [file supp_gr.217463.116_Supplemental_Fig_S11.pdf]

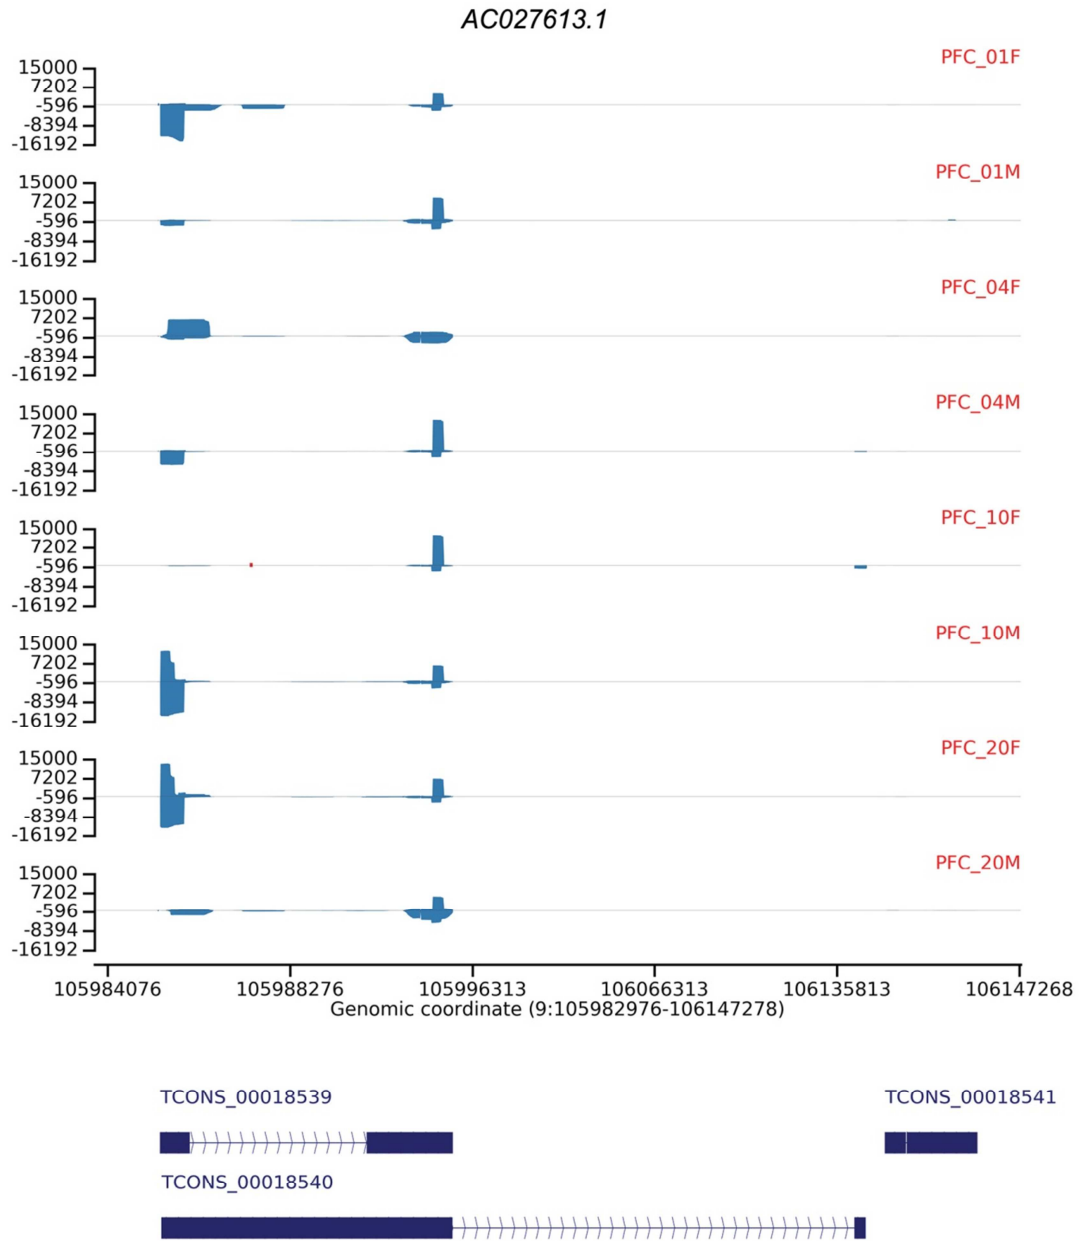

**Supplemental Fig S11. Reads density illustration of lncRNA *AC027613.1* in all eight PFC samples**

A reads density illustration of lncRNA *AC027613.1* in all PFC samples across four ages of both male and female.
