# Supplementary material for: Annotation and cluster analysis of spatiotemporal- and sex-related lncRNA expression in rhesus macaque brain
Source: PubMed Central journal article supplement (PMC5580719; doi:10.1101/gr.217463.116), 2017-09
Supplement: supp_gr.217463.116_Supplemental_Fig_S14.pdf [file supp_gr.217463.116_Supplemental_Fig_S14.pdf]

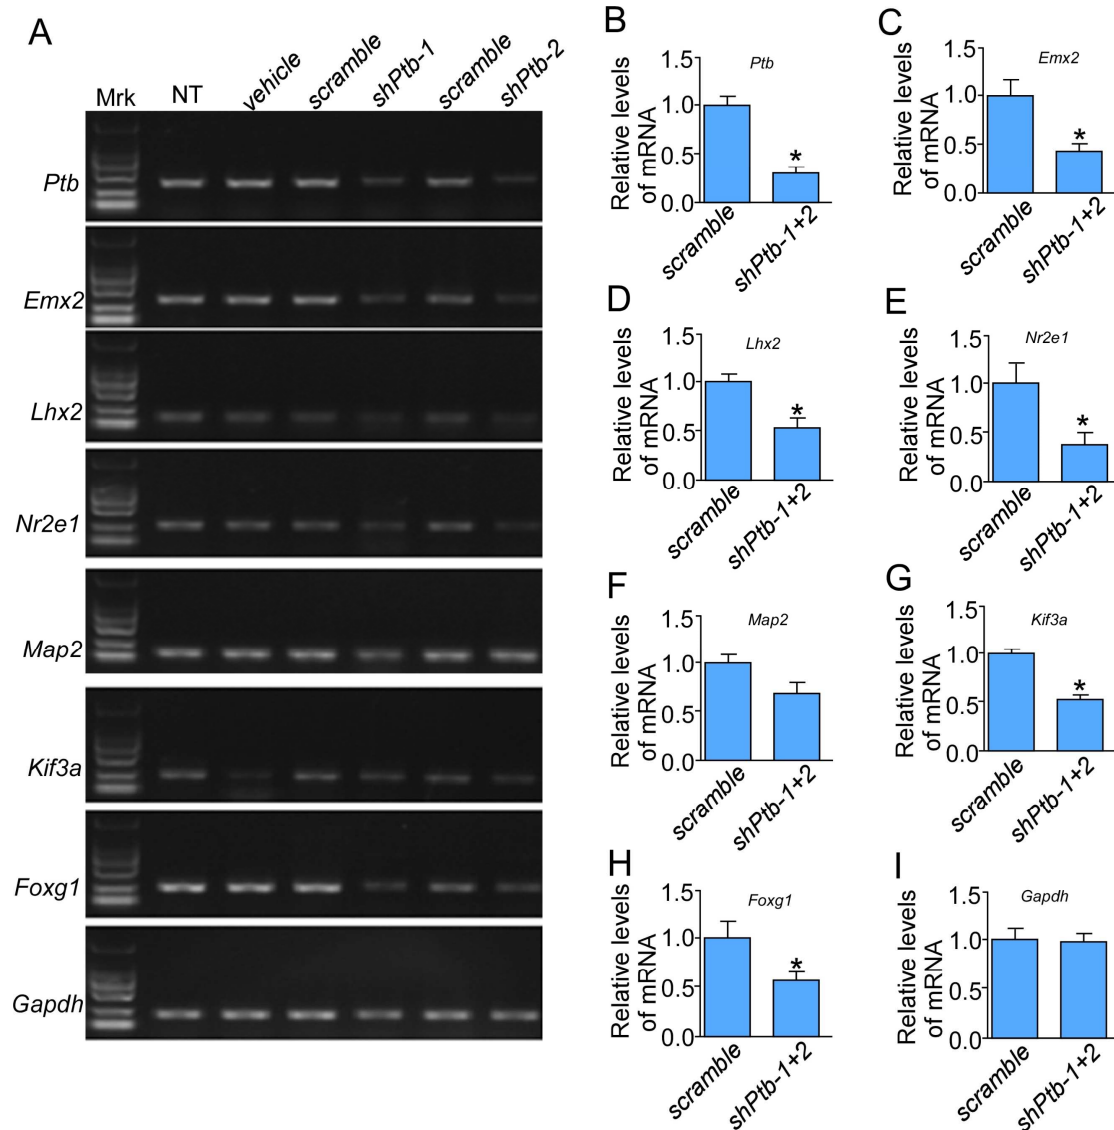

### Supplemental Fig S14. Knockdown of PTB increased its targeting mRNA gene expression

(A) Wild type mice embryonic neurons were infected at P3 with either scramble or lentiviral shRNAs targeting *Pt看*. On P10, neurons were collected, and total RNAs were extracted and performed reverse transcription, and PCR amplification. Representative blots of the amplified PCR fragments of *Pt看*, *Emx2*, *Lhx2*, *Nr2e1*, *Map2*, *Kif3a* and *Foxg1* at 30 cycles of are shown. *Gapdh* levels were used as the qualitative and quantitative control.

(B-I) Total RNAs were extracted from fetal macaque hippocampal neurons at indicated time, and performed quantitative PCR for validation *Pt看*, *Emx2*, *Lhx2*,

*Nr2e1*, *Map2*, *Kif3a*, *Foxg1* and *Gapdh* mRNA expression. Data are presented as mean  $\pm$  SD, n=3 technical replicates. \*, p< 0.05, unpaired *t* test.
