# Supplementary material for: Annotation and cluster analysis of spatiotemporal- and sex-related lncRNA expression in rhesus macaque brain
Source: Genome Res. 2017 Sep;27(9):1608–20. doi: 10.1101/gr.217463.116 (PMC5580719; doi:10.1101/gr.217463.116)
Supplement: Supplemental Material [file supp_gr.217463.116_Supplemental_Table_S1.xlsx]

## Sheet: legend
Supplemental Table S1- Summary of the RNA-Seq sequencing information and the gene expression values in all brain area samples.
Sequencing: The sequencing and alignment information for all RNA-seq samples
mRNA RPKM: The expression level (RPKM) for each mRNA genes detected in our study
lncRNA RPKM: The expression level (RPKM) for each lncRNA genes detected in our study

## Sheet: Sequencing
	Area	Sample	Raw	Filtered	Filtering Percentage	Total Mapped	Total/ Filtered	Unique Mapped	Unique/ Total
	Cornu Ammonis (CA1)	CA1_01F	136053180	117209544	0.861498	97394055	0.8309	84659008	0.8692
		CA1_01M	138744554	117632146	0.847833	95455554	0.8115	82737246	0.8668
		CA1_04F	206230596	123332190	0.598031	77771634	0.6306	65512507	0.8424
		CA1_04M	167718222	110399850	0.658246	73863805	0.6691	62641381	0.8481
		CA1_10F	163872660	115641496	0.705679	84014208	0.7265	71229054	0.8478
		CA1_10M	136116880	102866516	0.755722	69461113	0.6753	59235818	0.8528
		CA1_20F	109184374	80728354	0.739376	61354785	0.76	52871188	0.8617
		CA1_20M	100043436	80868018	0.808329	63566071	0.786	54306708	0.8543
	Cerebellar Cortex (CB)	CB_01F	155430746	105889812	0.681267	71257992	0.6729	61261189	0.8597
		CB_01M	187958290	140248021	0.746166	104565894	0.7456	90535189	0.8658
		CB_04F	170749488	128476376	0.752426	98483343	0.7665	85136995	0.8645
		CB_04M	162162136	120589665	0.743636	89314741	0.7407	77555804	0.8683
		CB_10F	103472614	88235815	0.852746	71924949	0.8151	62361479	0.867
		CB_10M	124422306	102103181	0.820618	81284099	0.7961	70951537	0.8729
		CB_20F	111185464	94971071	0.854168	76869299	0.8094	66673573	0.8674
		CB_20M	119259436	98217157	0.823559	79540564	0.8098	69252207	0.8707
	Dentate Gyrus (DG)	DG_01F	162802270	143543174	0.881703	120913719	0.8424	104449420	0.8638
		DG_01M	177517320	159310282	0.897435	134995663	0.8474	116615166	0.8638
		DG_04F	183103670	161686011	0.88303	136639906	0.8451	117887559	0.8628
		DG_04M	179876492	158514007	0.881238	133543008	0.8425	115896060	0.8679
		DG_10F	167924934	150339936	0.895281	128948160	0.8577	113440512	0.8797
		DG_10M	166758330	145628308	0.87329	123046172	0.8449	108432750	0.8812
		DG_20F	162385298	146670801	0.903227	125701756	0.857	110761988	0.8811
		DG_20M	158313026	141783524	0.89559	120597303	0.8506	105885024	0.878
	Occipital Cortex (OC)	OC_01F	165421696	147872259	0.893911	127516163	0.8623	111182001	0.8719
		OC_01M	160845552	145706814	0.90588	127230378	0.8732	111880016	0.8793
		OC_04F	167387666	146546197	0.87549	125331632	0.8552	109357066	0.8725
		OC_04M	177048878	159167247	0.899002	138714741	0.8715	121457686	0.8756
		OC_10F	153705332	138104658	0.898503	118884063	0.8608	103431968	0.87
		OC_10M	156491162	136915748	0.87491	116606596	0.8517	101750066	0.8726
		OC_20F	130129288	117613431	0.90382	103292114	0.8782	90232601	0.8736
		OC_20M	133854524	119644683	0.893841	103175025	0.8623	90374336	0.8759
	Parietal Cortex (PC)	PC_01F	99193186	79244268	0.798888	62579790	0.7897	54310313	0.8679
		PC_01M	89314026	77882879	0.872012	65016190	0.8348	56964021	0.8762
		PC_04F	102343722	83431909	0.815213	66852394	0.8013	58071985	0.8687
		PC_04M	108302440	89060721	0.822333	72462397	0.8136	63002693	0.8695
		PC_10F	151372958	110641516	0.73092	81080594	0.7328	69221807	0.8537
		PC_10M	151982148	123398733	0.811929	98460708	0.7979	85185712	0.8652
		PC_20F	138461744	116619692	0.842252	95245371	0.8167	82345756	0.8646
		PC_20M	161538170	125447698	0.776582	97210070	0.7749	83673216	0.8607
	Posterior Cingulate Cortex (PCC)	PCC_01F	171603784	151964861	0.885557	126335363	0.8313	109339751	0.8655
		PCC_01M	181948104	159617414	0.877269	129241250	0.8097	111664891	0.864
		PCC_04F	177393840	154670690	0.871906	125910455	0.8141	109095320	0.8665
		PCC_04M	185498896	164114440	0.884719	136221480	0.83	117884939	0.8654
		PCC_10F	171065386	144700557	0.845879	114590444	0.7919	98250671	0.8574
		PCC_10M	169232734	146635587	0.866473	118571284	0.8086	102654167	0.8658
		PCC_20F	181579800	160429982	0.883523	132781951	0.8277	114197640	0.86
		PCC_20M	171410970	145543952	0.849094	115759629	0.7954	99879422	0.8628
	Prefrontal Cortex (PFC)	PFC_01F	133058944	116730478	0.877284	97753205	0.8374	85858612	0.8783
		PFC_01M	143783804	115002574	0.79983	91571972	0.7963	79427258	0.8674
		PFC_04F	97954682	83954995	0.85708	69982841	0.8336	60563359	0.8654
		PFC_04M	98012760	85653979	0.873906	72219560	0.8432	62946857	0.8716
		PFC_10F	133217308	102717501	0.771052	78446908	0.7637	67669859	0.8626
		PFC_10M	83034866	70298724	0.846617	57948164	0.8243	50393933	0.8696
		PFC_20F	120661764	104916785	0.869511	88679290	0.8452	77056585	0.8689
		PFC_20M	119443698	100555828	0.841868	82410139	0.8195	71604513	0.8689
	Temporal Cortex (TC)	TC_01F	125557458	109809179	0.874573	92975999	0.8467	80750276	0.8685
		TC_01M	137624706	119572009	0.868827	101380010	0.8479	88608943	0.874
		TC_04F	146924602	124606173	0.848096	105002555	0.8427	91394029	0.8704
		TC_04M	153957684	127045904	0.8252	104364329	0.8215	90496249	0.8671
		TC_10F	152958412	124512978	0.814032	99520436	0.7993	85781014	0.8619
		TC_10M	169191048	139828238	0.826452	115345439	0.8249	99606508	0.8635
		TC_20F	162670432	134356857	0.825945	108702329	0.8091	93345815	0.8587
		TC_20M	192536990	161858181	0.84066	133557431	0.8252	114812526	0.8596

## Sheet: mRNA RPKM
Gene	DG_01F	DG_01M	DG_04F	DG_04M	DG_10F	DG_10M	DG_20F	DG_20M	PFC_01F	PFC_01M	PFC_04F	PFC_04M	PFC_10F	PFC_10M	PFC_20F	PFC_20M	PCC_01F	PCC_01M	PCC_04F	PCC_04M	PCC_10F	PCC_10M	PCC_20F	PCC_20M	CA1_01F	CA1_01M	CA1_04F	CA1_04M	CA1_10F	CA1_10M	CA1_20F	CA1_20M	CB_01F	CB_01M	CB_04F	CB_04M	CB_10F	CB_10M	CB_20F	CB_20M	OC_01F	OC_01M	OC_04F	OC_04M	OC_10F	OC_10M	OC_20F	OC_20M	TC_01F
ENSMMUG00000000001	1.19	1.02	0.88	1.1	1.2	1.53	1.29	1.44	1.32	1.47	1.29	1.65	1.83	2.15	2.34	1.78	1.05	0.82	1.03	1.13	1.27	1.49	2.04	1.36	1.03	0.91	0.63	0.85	0.77	1.06	1.09	0.66	3.1	2.98	2.64	3.28	3.38	4.12	4.01	3.44	1.64	1.24	1.72	1.56	1.56	1.91	1.8	1.61	1.87
ENSMMUG00000000002	0.2	0.21	0.19	0.25	0.49	0.27	0.07	0.16	0.58	0.33	0.52	0.54	0.63	0.47	0.31	0.4	0.42	0.43	0.57	0.24	0.47	0.61	0.1	0.4	0.46	0.33	0.3	0.07	0.37	0.24	0.22	0.45	0.22	0.67	0.39	0.26	0.26	0.71	0.46	0.5	0.34	0.35	0.36	0.38	0.53	0.45	0.42	0.4	0.73
ENSMMUG00000000004	0	0.01	0	0.01	0.01	0.01	0.01	0	0	0.03	0.01	0	0.01	0	0	0.04	0	0	0	0	0	0.01	0.01	0.01	0	0.01	0	0	0.02	0	0	0	0.03	0.02	0.01	0.04	0	0.05	0	0	0.03	0	0	0	0	0	0	0.01	0.01
ENSMMUG00000000005	0.76	0.62	0.67	0.29	0.43	0.4	0.53	0.43	0.57	0.54	0.89	0.43	0.92	0.43	0.9	0.62	0.23	0.53	0.64	0.65	0.73	0.46	0.93	0.52	0.46	0.36	0.84	0.42	0.5	0.67	0.83	0.54	1.39	1.77	0.99	1.31	1.4	1.25	1.67	1.38	0.46	0.55	0.7	0.39	0.88	0.36	1.17	0.82	0.46
ENSMMUG00000000006	0.07	0	0.02	0	0.01	0	0.02	0.01	0.03	0.01	0.04	0	0.02	0.07	0.03	0	0.11	0	0.01	0.02	0.07	0	0	0	0.04	0.07	0	0	0.03	0.06	0	0	0.07	0.02	0	0.05	0.04	0.11	0.01	0.05	0.06	0.05	0.01	0.04	0.03	0.03	0.06	0.16	0.01
ENSMMUG00000000007	2.05	1.5	1.77	1.53	1.31	1.39	1.33	1.22	0.95	0.91	1.55	1.64	1.15	0.94	1.63	1.77	1.1	1.11	1.38	1.49	1.25	0.99	0.69	1.43	1.27	1.09	1.51	0.8	1.56	0.78	1.55	0.8	17.61	18.98	20.29	17.32	17.43	16.63	17.32	18.86	8.68	11.42	14.48	11.53	9.92	8.48	9.87	10.72	9.37
ENSMMUG00000000009	0.66	0.68	1.75	0.77	0.61	0.58	0.79	0.77	0.9	0.61	0.82	0.7	0.57	0.34	0.64	0.69	0.57	0.49	1.03	0.82	0.28	0.48	0.58	0.51	0.85	0.65	1.26	1.11	0.52	0.72	1.01	1.2	0.43	0.42	0.72	0.52	0.31	0.4	0.53	0.43	0.75	0.59	0.89	0.59	0.55	0.62	0.75	0.82	0.92
ENSMMUG00000000010	35.2	35.21	36.11	28.81	27.08	26.33	23.78	27.62	39.67	30.78	39.79	31.11	35.96	34.9	35.09	30.48	36.96	28.91	29.41	35.72	33.82	29.75	30.58	28.63	32.42	30.83	39.41	28.55	32.57	32.13	33.62	35	49.07	42.31	39.74	38.77	44.84	41.2	35.26	39.19	37.01	37.68	37.56	37.13	33.91	33.25	35.62	31.06	39.3
ENSMMUG00000000012	0.05	0.11	0.03	0	0	0.03	0.01	0	0.06	0.02	0.05	0.03	0	0	0	0.04	0.01	0.01	0.03	0	0	0.02	0	0.06	0.02	0.02	0.02	0	0	0.05	0	0.03	0	0.11	0.08	0.1	0.05	0.14	0.02	0.16	0.02	0.01	0.06	0	0.15	0	0.01	0.09	0.02
ENSMMUG00000000013	4.55	4.38	5.66	4.84	5.04	4.91	4.4	4.96	4.5	4.54	3.99	4.53	4.28	3.93	4.06	4.36	3.66	3.62	5.5	5.41	4.25	3.79	3.2	4.32	4.39	4.28	4.03	3.76	2.77	3.54	4.06	3.68	18.21	16.51	17.56	18.66	18.5	15.96	16.35	18.26	11.97	14.35	13.01	12.39	12.3	11.02	11.97	12.06	10.2
ENSMMUG00000000014	0	0	0	0.01	0.04	0.02	0	0.01	0.01	0.02	0.02	0	0	0	0.01	0	0	0	0	0	0	0.02	0	0.04	0.03	0.01	0	0	0.05	0.04	0.02	0.12	0	0	0.01	0.03	0.02	0	0	0.02	0	0	0	0	0.01	0	0	0	0
ENSMMUG00000000015	0.02	0	0.06	0	0.02	0	0	0	0	0.04	0.03	0	0.03	0	0.02	0	0.19	0	0	0.01	0	0	0	0	0.04	0	0	0.03	0	0	0	0	0.57	0.45	0.04	0.3	0.08	0.07	0.05	0.08	0.05	0.03	0	0.03	0.05	0	0	0.12	0.04
ENSMMUG00000000016	11.4	12.84	15.05	10.5	10.96	10.33	9.29	10.94	15.13	14.45	13.82	12.92	13.66	11.36	14.39	11.97	10.92	9.99	12.27	12.49	12.02	8.96	10.77	11.78	11.96	12.41	11.85	10.32	9.71	10.85	10.98	8.93	14.02	14.1	14.69	13.32	14.14	11.53	13.3	14.49	14.88	17.81	17.33	16.58	15.18	13.08	16.45	15.67	16
ENSMMUG00000000017	0.02	0	0	0	0	0	0	0	0	0	0	0.04	0.03	0	0	0	0.02	0	0.02	0.02	0.02	0	0	0	0.03	0.05	0	0	0.03	0	0	0	0.07	0.08	0	0	0	0.03	0.1	0	0	0	0	0.06	0	0	0	0	0
ENSMMUG00000000018	0.01	0.02	0.01	0.01	0.04	0	0.01	0.01	0	0.01	0.04	0.04	0.06	0.05	0.02	0	0.01	0	0.01	0.02	0	0	0	0	0.01	0	0	0.04	0	0	0.02	0	0	0.03	0.01	0.06	0	0.04	0.06	0.05	0	0	0	0.05	0	0	0.04	0.04	0
ENSMMUG00000000019	2.45	2.13	2.66	1.95	1.66	1.82	1.87	1.65	2.44	1.82	2.63	2.02	2.43	2.57	3	2.4	2.1	1.71	1.77	2.12	2.63	2.36	3	2.25	1.67	1.69	2.44	1.73	2.15	3.04	1.79	1.78	3.26	3.55	2.35	3.07	3.87	5.26	3.27	3.89	3.35	2.76	3.09	2.99	3.71	3.36	3.17	3.01	2.55
ENSMMUG00000000020	1.33	1.07	1.21	0.95	0.45	0.61	0.88	0.64	1.45	0.98	1.14	0.99	0.66	0.77	1.14	0.99	1.23	1.49	0.98	0.82	0.43	0.72	0.99	0.6	1.28	1.27	1.19	1.47	0.93	1.75	1.48	1.52	1.23	1.09	0.95	1.17	0.97	1.24	1.32	1.12	2.74	1.89	1.59	1.21	1.04	0.69	1.4	1.52	3.88
ENSMMUG00000000021	0.52	0.45	0.46	0.33	0.48	0.25	0.43	0.47	0.35	0.4	0.29	0.3	0.35	0.34	0.4	0.41	0.33	0.22	0.21	0.29	0.26	0.31	0.2	0.17	0.45	0.31	0.44	0.26	0.36	0.4	0.31	0.34	2.02	1.98	1.48	1.78	1.95	1.54	1.77	2.29	1.86	1.72	1.68	1.83	2.23	1.59	1.96	2.01	1.65
ENSMMUG00000000022	0	0	0	0	0	0	0	0	0	0	0	0	0	0	0	0	0	0	0	0	0	0	0	0	0	0	0	0	0	0	0	0	0.04	0.08	0.1	0.07	0.09	0.01	0.06	0.08	0.03	0.01	0.03	0.01	0.02	0.04	0.01	0.03	0.02
ENSMMUG00000000023	0.01	0.02	0	0.01	0.01	0	0	0	0.09	0	0.07	0.03	0.01	0	0	0.01	0	0.03	0.01	0	0	0.02	0.01	0.01	0.04	0.02	0	0.03	0	0	0.03	0	0.05	0.03	0.1	0.03	0.09	0.01	0.02	0.06	0.06	0.02	0.06	0.14	0.22	0.06	0.05	0.17	0.02
ENSMMUG00000000024	0.03	0.06	0.01	0.02	0.02	0.05	0.02	0.03	0.29	0.16	0.67	0.23	0.66	0.3	0.5	0.43	0.21	0.27	0.41	0.3	0.23	0.06	0.03	0.04	0.06	0.07	0.03	0.02	0.04	0.06	0.05	0.04	0.39	0.31	0.28	0.12	0.25	0.08	0.2	0.4	0.21	0.18	0.27	0.06	0.17	0.29	0.24	0.38	0.15
ENSMMUG00000000025	1.06	1.16	0.67	0.92	0.7	0.88	0.71	0.81	1.11	0.71	1.19	1.17	1.16	0.94	1.15	1.12	0.82	0.47	1.08	0.87	0.83	1.1	0.87	1.09	0.72	1.03	1.1	0.7	0.99	0.9	0.73	0.47	6.28	7	6.28	7.08	7.08	6.7	8.06	6.24	2.31	2.28	2.25	1.97	2.34	2.42	2.13	2.34	1.77
ENSMMUG00000000026	0	0	0	0	0.02	0	0	0	0	0	0	0	0	0	0	0	0	0	0	0	0	0	0	0	0	0	0	0	0	0	0	0	0	0	0	0	0	0	0	0	0	0	0	0	0	0	0	0	0
ENSMMUG00000000027	0.8	0.75	0.55	0.84	0.47	0.39	0.64	0.44	0.67	1.11	0.97	1.42	0.42	1.17	0.69	0.68	0.65	0.86	0.73	0.59	0.48	0.22	0.75	0.57	0.86	1.23	0.5	0.91	0.71	0.45	0.23	0.52	0.36	0.64	0.81	1	0.79	0.86	0.39	0.4	1.84	1.12	1.76	1.91	1.26	1.05	0.6	1.89	1.34
ENSMMUG00000000029	5.27	4.84	6.36	4.12	7.04	4.81	4.82	5.1	5.33	4.78	8.68	6.72	6.93	7.53	9.92	7.59	4.14	3.31	5.55	5.89	5.3	4.97	9.39	5.11	4.56	3.42	4.1	4.95	4.14	4.43	5.71	5.21	25.22	27.34	25.54	26.31	26.21	30.19	26.56	27.68	13.37	14.27	16.12	14.61	16.23	13.03	18.76	14.62	8.09
ENSMMUG00000000030	2.92	3.07	5.28	2.4	2.33	2.45	2.15	2.68	3.81	2.38	4.69	3.13	4.07	3.88	3.75	3.61	3.95	2.71	3.57	3.9	3.98	4	4.44	3.7	3.45	3.16	8.29	4.44	4.12	5.48	3.1	5.23	17.02	16.06	17.33	20.16	17.25	22.47	21.92	21.78	12.09	11.63	12.28	13.28	17.43	15.53	19.84	14.89	11.55
ENSMMUG00000000031	3.16	3.21	4.1	2.94	2.65	2.36	2.46	2.63	6.82	6.48	9.13	9.61	9.37	8.18	9.35	8.66	6.31	6.32	7.6	8.05	8.23	7.33	8.77	7.57	4.07	4.3	3.5	4.69	4.14	4.04	4.32	3.9	3.65	3.69	3.96	3.87	6.24	4.96	4.41	4.75	9.76	8.68	8.95	8.6	10.42	8.77	9.25	9.83	7.78
ENSMMUG00000000032	0.21	0.31	0.78	0.56	0.18	0.12	0.15	0.32	0.39	0.21	0.58	0.58	0.78	0.76	0.82	0.66	0.71	0.53	0.23	0.36	0.91	0.13	1.21	0.19	0.23	0.59	0.65	0.56	0.54	0.15	0.28	0.27	0.6	0.93	0.72	1.05	0.85	0.86	0.8	0.88	0.24	0.84	0.7	1.09	0.99	0.72	0.76	1	0.67
ENSMMUG00000000033	5.37	5.63	5.63	4.69	4.54	4.83	3.92	4.1	7.02	5.19	6.96	8.17	6.03	6.73	6.64	6.57	4.14	5.76	4.95	6.5	4.54	5.7	6.67	5.14	4.95	5.1	5.98	5.77	5.99	6.28	6.29	5.91	7.88	9.13	8.5	8.66	8.46	10.33	9.22	8.5	9.21	8.39	8.23	8.25	8.05	9.12	8.19	8.65	8.72
ENSMMUG00000000034	0.04	0.03	0.07	0.04	0.05	0.03	0.07	0.12	0.03	0.08	0.04	0.05	0.05	0.06	0.05	0.02	0.08	0.01	0.16	0.05	0.01	0.02	0.11	0.06	0.05	0.03	0.12	0.04	0	0.03	0.02	0.06	0.05	0.08	0.09	0.04	0.04	0.11	0.05	0.08	0.01	0.05	0.02	0.12	0.04	0.02	0.01	0.13	0.08
ENSMMUG00000000036	0	0	0	0	0	0	0	0	0	0	0	0	0	0	0	0	0	0	0	0	0	0	0	0	0	0	0	0	0	0	0	0	0	0.03	0.07	0	0	0	0.01	0.01	0	0	0.02	0	0	0.02	0	0	0.03
ENSMMUG00000000037	5.67	6.52	7	5.65	4.82	5.43	4.46	4.96	6.33	6.04	6.78	6.86	6.51	6.82	6.5	6.23	4.49	4.43	5.15	4.62	4.34	4.92	5.82	5.73	5.61	5.62	6.93	5.04	5.8	6.7	5.03	6.21	10.91	11.88	9.77	11.4	11.17	12.45	11.37	11.64	7.99	7.68	7.59	8.22	6.87	8.63	8.98	8.16	8.3
ENSMMUG00000000038	9.27	9.98	9.48	9.09	8.23	7.34	6.75	7.36	9.77	9.36	12.95	12.23	13.59	12.32	13.03	12.4	9	8.19	10	11.8	12.2	9.45	14.12	10.24	8.43	9.26	10.17	8.55	9.68	9.7	10.41	10	15.18	16.83	16.38	17.48	17.95	20.48	18.91	17.26	15.21	14.24	16.38	18.03	17.61	16.54	17.39	16.09	13.48
ENSMMUG00000000039	74.13	71.26	76.03	71.52	57.62	50.22	49.98	56.36	66.83	47.47	78.91	73.08	86.26	79.22	78.11	74.38	59.58	49.69	60.98	72.32	80.79	65.23	77.14	68.27	61.74	57.33	81.42	78.07	83.89	98.23	66.12	81.35	47.87	52.12	49	60.11	61.15	66.12	56.9	55.78	61.97	51.97	64.92	63.53	61.95	58.8	65.14	59.86	66.31
ENSMMUG00000000040	7.57	6.8	7.57	7.43	6.81	5.12	6.79	7.01	6.48	5.07	6.78	5.52	6.07	7.76	6.02	6.21	7.32	7.21	7.12	5.95	7.6	7.32	9.13	9.06	8.88	8.21	12.88	11.36	10.19	12.44	10.32	10.54	6.77	6.74	6.78	5.35	6.12	5.97	6.71	6.18	10.04	9.83	10.12	10.01	8.88	9.7	10.09	9.74	6.88
ENSMMUG00000000041	0.28	0.13	0.24	0.13	0.18	0.12	0.1	0.08	0.39	0.3	0.26	0.22	0.33	0.07	0.21	0.33	0.36	0.32	0.18	0.31	0.16	0.19	0.04	0.05	0.61	0.88	0.39	0.31	0.16	0.62	0.12	0.2	0.22	0.18	0.3	0.16	0.24	0.12	0.22	0.2	0.34	0.38	0.26	0.12	0.13	0.13	0.25	0.34	0.24
ENSMMUG00000000042	7.25	5.85	4.82	6.08	4.94	6.78	3.49	4.27	4.71	4.87	3.42	3.46	2.88	3.09	3.29	3	3.36	2.77	1.7	2.71	1.68	1.92	2.03	2.24	3.06	2.96	2.2	2.17	2.04	2.44	2.88	2.04	4.04	3.96	5.18	5.36	4.69	4.56	5.22	5.17	6.86	8.61	7.19	6.53	5.98	7.84	7.24	6.18	9.7
ENSMMUG00000000043	12.55	13.89	12.61	12.63	12.63	12.08	10.42	13.57	12	14.29	10.6	13.75	12.98	10.91	13.13	12.63	10.36	9.9	14.51	16.79	14.26	10.93	11.84	14.61	10.53	11.28	10.02	11.28	10.5	9.62	10.94	12.23	23.45	22.3	26.07	23.03	22.22	16.68	22	20.71	20.74	25.24	26.28	25.79	25.46	19.9	23.82	22.93	21.48
ENSMMUG00000000044	2.67	2.65	1.89	2.42	2.06	2.41	2.32	2.55	1.72	1.71	2.4	2.2	1.84	2.74	2.48	2.63	1.43	1.34	1.63	1.88	1.43	2.18	2.64	1.64	1.64	1.61	1.62	1.83	1.74	2.22	2.46	2.16	3.77	4.59	3.44	4.5	3.5	4.42	5.33	3.74	3.01	2.49	2.6	3.32	2.56	3.48	2.81	3.09	2.65
ENSMMUG00000000045	0	0	0	0	0	0	0	0	0	0	0	0	0	0	0	0	0	0	0	0	0	0	0	0	0	0	0	0	0	0	0	0	1.11	1.53	0.84	1.09	1.02	0.93	0.89	0.76	1.36	1.27	1.51	1.04	1.5	1.09	1.39	1.07	0.93
ENSMMUG00000000046	0.02	0.02	0.02	0	0.02	0	0.01	0	0.01	0	0.03	0.01	0.06	0	0	0.01	0	0	0	0	0.01	0.01	0	0	0	0.01	0.01	0.03	0	0	0.01	0	0.03	0.04	0.01	0.02	0	0.03	0.02	0.03	0.03	0	0.02	0	0.02	0	0.01	0.03	0.02
ENSMMUG00000000047	0.01	0	0	0	0	0	0	0.02	0	0.05	0	0	0.01	0	0	0	0	0.02	0	0.01	0	0	0	0	0.01	0	0	0.02	0	0	0	0	0	0	0.07	0.03	0	0.03	0	0.03	0	0	0	0.01	0	0	0	0.02	0
ENSMMUG00000000048	0.03	0.02	0.04	0.02	0.03	0.02	0.04	0.04	0.08	0.08	0.08	0.05	0.28	0.16	0.2	0.27	0.04	0.03	0.06	0.08	0.14	0.11	0.04	0.06	0.06	0.03	0.05	0.01	0.04	0.1	0.07	0.01	0.05	0.12	0.06	0.03	0.13	0.01	0.04	0.05	0.11	0.1	0.06	0.06	0.33	0.08	0.19	0.11	0.23
ENSMMUG00000000049	16.33	19.38	26.96	15.05	12.42	14.99	20.74	19.92	9.87	9.92	11.64	9.03	11.1	11.27	11.27	10.35	10.29	12.11	17.62	11.87	15.78	15.53	16.25	18.07	32.45	35.8	58.88	40.62	33.59	44.12	29.7	43.1	22.55	19.92	18.78	19.14	18	18.25	20.18	21.1	15.3	18.19	22.47	23.48	17.96	20.03	22.71	20.95	14.38
ENSMMUG00000000050	39.47	35.18	40.41	35.11	27.41	22.66	22.7	27.03	26.21	19.89	29.39	27.21	26.38	28.36	27.8	27.41	32.33	28.07	37.07	33.83	34.11	30.9	30.8	32.26	24.63	24.86	37.84	28.53	29.57	41.01	27.1	31.38	59.35	50.93	57.4	53.4	52.93	55.34	60.44	55.28	26.62	25.27	30.29	22.97	27.83	25.44	22.27	25.35	35.31
ENSMMUG00000000051	0.23	0.24	0.15	0.21	0.25	0.31	0.2	0.14	0.16	0.12	0.25	0.27	0.34	0.22	0.27	0.2	0.13	0.23	0.14	0.27	0.27	0.3	0.15	0.42	0.2	0.3	0.16	0.12	0.31	0.3	0.23	0.11	1.06	1.87	1.32	1.58	1.4	0.96	1.36	1.37	0.84	1.01	0.88	1.17	1.32	1.22	0.8	1.03	0.5
ENSMMUG00000000052	0.21	0.09	0.17	0.1	0.21	0.1	0.12	0.06	0.19	0.16	0.6	0.14	0.13	0.03	0.18	0.05	0.39	0.26	0.3	0.17	0.07	0.13	0.11	0.15	0.47	0.58	0.21	0.44	0.24	0.12	0.13	0.03	0.45	0.32	0.48	0.73	0.52	0.31	0.7	0.45	0.59	0.4	0.38	0.3	0.4	0.42	0.25	0.32	0.21
ENSMMUG00000000053	0.35	0.49	0.37	0.23	0.41	0.18	0.18	0.31	0.25	0.16	0.33	0.16	0.54	0.2	0.09	0.14	0.24	0.45	0.12	0.34	0.34	0.03	0	0.3	0.2	0.32	0.15	0.37	0.33	0	0.32	0.31	0.16	0.14	0.22	0.17	0.26	0.53	0.35	0.05	0.09	0.09	0.45	0.29	0.34	0.22	0	0.25	0.51
ENSMMUG00000000054	5.78	6.58	7.06	5.43	3.69	4.24	3.54	4.15	5.88	3.69	7.01	5.78	6.98	6.39	7.08	6.27	8.98	6.73	7.2	8.29	7.91	7.38	8.79	6.09	6.6	6.38	8.5	8.08	6.92	10.44	6.36	7.37	17.39	15.65	19.65	18.49	20.42	20.23	18.1	18.39	10.3	8.46	9.73	8.58	11.14	9.18	9.94	7.68	11.91
ENSMMUG00000000055	0.13	0.04	0	0.3	0.12	0	0	0	0.17	0.05	0.14	0	0	0	0.28	0.06	0.28	0.04	0.2	0.22	0.09	0.13	0.15	0.13	0.1	0.21	0.07	0	0	0.74	0.25	0.32	0.11	0.76	0.21	0.39	0.27	0.29	0.53	0.19	0.11	0.31	0.13	0.11	0.17	0.17	0.19	0.09	0.16
ENSMMUG00000000056	16.22	15.39	17.5	14.56	14.48	15.05	11.33	16.52	14.14	13.46	13.59	15.5	13.77	14.29	12.81	13.66	10.67	9.81	12.19	13	12.49	9.12	8.32	12.93	12.26	11.4	13.41	12.71	12.37	12.13	13.88	15.14	14.86	14.11	15.08	14.04	17.02	11.82	13.99	15.68	12.51	15.15	16.68	17.13	15.16	14.55	18.11	16.99	14.65
ENSMMUG00000000058	23.33	22.15	29.63	21.43	20.6	21.57	21.2	22.95	27.77	27.79	32.99	25.37	25.74	26.2	31.86	28.57	21.75	18.51	26.46	23.95	22.73	20.06	23.35	25.15	22.69	19.74	27.38	17.85	18.6	20.65	22.81	21.71	16.31	16.2	20.12	17	17.86	16.25	17.37	21.43	19.03	20.84	25.61	20.3	21.64	21.19	25.64	24.95	26.13
ENSMMUG00000000059	2.76	2.46	2.63	2.36	2.8	2.75	2.19	2.62	2.35	2.8	2.06	2.18	1.84	1.88	2.06	2.18	2.18	2.21	2.19	2.26	1.76	1.56	1.8	1.91	2.45	2.38	2.25	1.94	2.25	1.94	2.5	1.78	8.2	7.76	8.85	7.45	7.8	6.5	7.74	7.91	7.58	8.74	8.6	8.43	7.28	7.27	8.54	7.56	8.92
ENSMMUG00000000061	5.03	5.56	5.57	4.87	3.91	3.5	4.44	4.8	6.24	5.41	7.78	7.03	7.71	8.15	8.13	5.86	5.66	4.17	4.82	6.19	6.42	6.17	6.52	5.47	5.43	5.12	9.52	5.8	7.3	10.38	7.85	5.53	4.67	5.38	4.12	5.89	5.64	6.6	7.33	7.39	6.81	6.5	8.34	5.95	8.06	7.1	10.6	7.36	5.14
ENSMMUG00000000062	0	0	0	0	0	0	0	0.04	0	0	0	0	0	0	0	0.02	0	0.1	0	0	0	0	0	0	0.02	0	0	0	0	0	0	0	0	0	0	0	0.07	0.02	0	0.02	0	0	0	0	0.01	0.02	0	0	0
ENSMMUG00000000063	16.27	15.59	19.74	20.3	22.68	20.37	18.62	19.16	15.47	13.23	23.63	23.15	24.15	24.52	26.95	23.84	14.18	12.53	16.17	17.5	16.88	17.35	22.11	17.68	14.29	13.77	13.26	13.5	16.48	18.74	19.51	14.02	71.76	80.46	68.76	83.58	71.65	100.22	77.99	82.73	36.42	32.79	34.13	34.24	33.94	33.01	34.24	34.59	22.26
ENSMMUG00000000064	0	0.02	0.02	0	0.06	0	0	0.03	0	0.02	0	0	0.05	0	0.02	0.05	0	0	0	0	0	0	0	0	0	0	0.08	0.03	0	0	0	0	0	0.1	0	0	0.26	0.26	0.11	0.14	0.03	0	0.02	0	0	0	0	0	0.03
ENSMMUG00000000065	0	0	0	0	0	0	0	0	0	0	0	0	0	0	0	0	0	0	0	0	0	0	0	0	0	0	0	0	0	0	0	0	18.02	22.34	36.35	25.61	23.22	19.25	25.07	26.63	16.22	22.72	37.99	33.57	38.18	33.91	40.88	38.55	17.5
ENSMMUG00000000066	0	0	0	0	0	0	0	0	0	0	0.08	0	0	0	0.06	0	0	0	0	0	0	0.09	0	0	0	0.06	0	0.08	0	0	0	0	0	0	0	0	0	0	0.07	0	0	0	0	0	0	0	0	0	0
ENSMMUG00000000067	1.59	1.29	3.12	1.08	1.04	1.35	1.04	1.47	5.36	4.59	6.29	6.36	5.54	5.33	6	6.57	2.87	2.44	3.75	3.98	3.23	3.16	3.34	3.31	2.74	2.72	2.23	2.01	1.99	2.67	2.17	2.27	2.45	2.87	3.31	3.14	2.57	2.4	2.28	2.17	32.53	36.68	28.48	27.13	24.85	28.4	23.12	20.86	33.11
ENSMMUG00000000068	0.03	0.01	0	0	0	0	0	0	0.01	0	0	0.01	0.01	0.04	0.04	0.04	0	0.01	0.02	0.03	0	0.03	0	0	0	0	0	0	0	0	0	0.02	0	0.01	0	0.02	0	0.01	0	0	0	0	0	0	0	0	0	0	0.05
ENSMMUG00000000069	0	0	0	0	0	0	0	0	0	0	0	0	0	0	0	0	0	0	0	0	0	0	0	0	0	0	0	0	0	0	0	0	24.13	30.18	21.44	22.13	19.65	21.69	20.52	24.11	11.66	12.73	11.17	12.14	10.2	14.23	15.1	12.77	12.42
ENSMMUG00000000070	0	0	0	0	0	0	0	0	0	0	0	0	0	0	0	0	0	0	0	0	0	0	0	0	0	0	0	0	0	0	0	0	2.15	2.24	1.26	1.41	1.29	2.07	1.51	1.8	1.48	1.16	0.75	1.44	1.16	1.68	1.98	1.35	0.91
ENSMMUG00000000072	0	0	0	0	0	0	0	0	0	0	0	0	0	0	0	0	0	0	0	0	0	0	0	0	0	0	0	0	0	0	0	0	5.74	5.91	5.39	4.21	6.14	6.33	5.14	5.83	6.07	5.33	6.54	4.3	3.8	4.93	5.17	5.86	5.05
ENSMMUG00000000073	0	0	0	0	0	0	0	0	0	0	0	0	0	0	0	0	0	0	0	0	0	0	0	0	0	0	0	0	0	0	0	0	4.14	3.02	3.56	2.55	1.01	1.74	1.48	1.98	0.49	0.44	0.85	0.66	0.61	0.68	0.83	0.57	0.48
ENSMMUG00000000074	46.99	43.73	55.75	44.31	33.06	32.26	34.51	38.38	50.53	36.04	60.91	55.2	52.03	62.62	57.14	53.37	38.26	33.79	45.13	50.58	45.3	48.08	54.05	43.66	41.1	37.77	59.67	48.46	45.32	64.26	46.78	54.43	56.13	57.55	55.68	62.59	60.25	66.9	60.18	58.82	52.53	48.13	61.78	62.09	55.97	59.91	64.63	54.19	52.31
ENSMMUG00000000075	0.41	0.28	0.46	0.25	0.21	0.34	0.22	0.4	0.39	0.21	0.35	0.41	0.26	0.3	0.38	0.27	0.14	0.14	0.18	0.32	0.18	0.2	0.23	0.17	0.28	0.28	0.25	0.35	0.18	0.29	0.27	0.35	5.23	4.67	6.53	5.65	5.66	5.1	5.53	5.58	3.19	4.78	3.94	3.37	3.51	4.19	3.81	3.81	2.13
ENSMMUG00000000076	0	0	0	0	0	0	0	0	0	0	0	0	0	0	0	0	0	0	0	0	0	0	0	0	0	0	0	0	0	0	0	0	0.14	0.08	0.06	0.04	0.03	0.02	0.1	0.19	0	0.04	0.09	0.01	0.04	0.01	0.09	0.04	0.02
ENSMMUG00000000079	0.08	0.03	0.07	0.08	0.1	0.13	0.22	0.08	0.07	0.08	0.04	0.08	0.04	0.06	0.07	0.12	0.05	0.04	0.13	0.07	0.16	0.01	0.03	0.01	0.01	0.05	0.05	0.11	0.1	0.23	0.12	0.07	1.39	1.67	1.37	1.57	1.64	2.2	2.2	1.52	0.35	0.21	0.57	0.81	0.73	0.78	0.5	0.63	0.2
ENSMMUG00000000080	0.01	0.07	0.1	0.06	0.04	0.1	0.05	0.08	0.03	0.04	0.07	0.05	0.07	0.06	0.04	0.04	0.11	0.04	0.09	0.05	0.07	0.09	0.09	0.05	0.11	0.08	0.06	0.02	0.11	0.06	0.05	0.1	0.03	0.02	0.08	0.03	0.02	0.02	0.02	0.04	0.12	0.02	0.06	0.07	0.11	0.02	0.05	0.04	0.07
ENSMMUG00000000081	5.39	5.56	7.27	5.66	5.95	5.85	5.3	5.25	6.04	4.67	7.89	6.85	6.76	7.41	8.01	5.08	4.58	4.69	4.36	5.29	4.8	7.11	6.01	3.84	5.53	5.37	5.3	5.17	6.51	6.26	6.11	4.09	19.85	17.61	22.86	22.67	24.48	27.15	22.66	19.77	14.14	11.14	18.66	14.07	17.5	16.32	14.94	13.66	8.28
ENSMMUG00000000082	0.34	0.4	0.17	0.34	0.21	0.19	0.18	0.25	0.28	0.2	0.28	0.24	0.11	0.07	0.17	0.13	0.22	0.17	0.22	0.08	0.13	0.25	0.21	0.32	0.24	0.2	0.23	0.3	0.18	0.35	0.18	0.41	0.27	0.1	0.35	0.17	0.18	0.26	0.2	0.08	0.1	0.22	0.05	0.14	0.23	0.11	0.37	0.23	0.28
ENSMMUG00000000083	1.25	1.61	1.33	1.58	1.24	0.96	1.06	0.95	1	1.48	1.88	1.36	1.68	1.74	2.06	1.29	0.95	0.83	0.61	1.36	1.23	0.88	1.76	0.78	0.76	1.28	1.08	1.21	1.37	1.53	1.47	1.22	4.6	4.34	2.94	4.45	4.27	4.27	4.04	2.91	1.88	2.08	1.97	2.07	2.22	1.58	2.44	1.91	2.33
ENSMMUG00000000084	1.61	1.61	2.04	1.71	1.77	1.98	1.97	1.53	1.12	1.35	2.72	2.52	2.54	2.88	2.66	1.43	1.3	1.24	1.66	1.68	0.74	2.12	2.08	1.26	2.14	1.52	1.36	4.58	2.36	3.51	2.68	0.97	3.24	5.08	3.17	3.15	4.1	5.38	3.61	4.24	2.42	2.87	2.26	1.63	3.02	2.33	3.78	1.68	3.08
ENSMMUG00000000085	54.43	51.36	50.91	44.39	30.59	31.85	54.99	48.75	33.32	20.5	36.59	37.74	47.41	56.42	59.08	51.75	43.57	35.98	36.99	41.53	61.34	65.55	92.78	76.84	92.89	74.93	146.36	112.45	119.05	174.76	115.13	168.55	41.5	33.37	29.56	44.47	39.49	47.34	37.44	44.41	44.03	29.06	37.4	60.29	54.53	52.65	101.32	57.28	32.73
ENSMMUG00000000086	5.34	5.2	5.7	5.54	5.5	5.61	4.84	5.44	4.08	4.35	3.7	3.95	3.28	3.35	3.66	3.33	3.27	3.31	3.48	3.96	3.16	3.38	3.27	3.9	4.57	4.75	4.7	3.77	4.11	3.65	4.56	4.12	6.97	7.19	6.91	6.36	6.43	5.71	6.34	7.18	6.66	7.77	6.94	6.56	5.78	6.29	7.7	6.64	5.52
ENSMMUG00000000087	1.29	1.27	0.96	0.93	1.34	1.74	1.41	1.51	0.73	0.82	0.61	0.52	0.7	0.69	0.58	0.53	0.93	0.63	0.78	0.64	0.46	0.59	0.34	0.57	0.95	1.14	0.87	0.73	1.1	0.81	1.04	1.01	2.07	2.32	1.9	1.89	1.84	1.7	2.21	1.88	1.7	1.59	1.58	2	1.05	1.18	1.25	1.46	1.28
ENSMMUG00000000088	0	0.03	0	0	0	0	0	0	0.04	0	0	0	0	0.03	0	0	0.06	0.1	0.02	0	0	0	0	0.02	0	0	0	0.03	0	0	0	0	0	0.02	0	0.04	0	0.02	0	0	0	0	0	0	0	0	0	0	0
ENSMMUG00000000089	0.01	0.03	0.01	0.03	0.02	0.02	0.02	0.04	0.07	0.03	0.21	0.11	0.27	0.04	0.19	0.19	0.08	0.16	0.17	0.15	0	0.01	0.01	0	0.03	0.02	0.05	0.08	0.05	0.1	0.01	0.01	0.39	0.9	0.55	0.4	0.37	0.19	0.42	0.59	1.46	2.95	1.5	0.92	0.83	1.62	0.6	0.76	0.52
ENSMMUG00000000090	13.82	13.14	16.18	13.76	10.58	11.49	11.2	12.1	15.49	13.54	21.55	22.51	19.67	25.76	23.84	21.8	15.58	13.13	16.86	19.91	17.15	20.47	25.68	20.41	13.97	13.55	15.92	14.65	14.75	18.57	15.9	17.11	17.93	18.44	16.96	20.99	20.92	26.02	21.41	20.31	21.43	17.1	21.11	23.74	20.36	23.16	24.05	23.43	17.99
ENSMMUG00000000091	0.43	0.31	0.58	0.48	0.42	0.46	0.45	0.42	0.43	0.29	0.56	0.65	0.43	0.63	0.59	0.48	0.4	0.38	0.4	0.55	0.32	0.55	0.58	0.53	0.48	0.32	0.8	0.56	0.78	0.86	0.63	0.7	0.71	0.93	1.09	1	1.16	1.3	1.26	1.18	0.47	0.33	0.8	0.72	0.64	0.97	0.94	0.84	0.54
ENSMMUG00000000092	2.12	2.48	1.77	2.19	1.85	1.87	1.76	1.9	2.08	1.71	2.59	2.59	2.7	2.7	2.65	2.46	1.6	1.79	1.83	2	2.34	2.5	2.9	2.03	1.7	1.97	2.13	2.09	2.16	3.24	2.49	2.74	2.54	2.33	1.78	2.42	2.68	2.7	2.78	2.21	2.6	1.78	1.78	2.59	2.61	2.57	2.03	1.96	2.41
ENSMMUG00000000093	0.02	0.05	0	0	0.04	0.07	0	0	0	0.02	0	0	0	0	0	0.06	0	0.02	0	0.02	0	0	0	0	0	0	0	0	0.08	0	0.04	0	0	0.02	0.07	0.03	0.13	0.03	0	0.09	0.04	0	0	0.02	0	0.04	0.1	0.04	0.02
ENSMMUG00000000094	8.63	11.24	7.2	9.05	15.19	14.58	16.09	11.91	7.03	13.46	8.54	8.58	9.24	9.7	12.49	11.4	7.64	8.21	7.97	7.5	9.72	8.06	9.29	10.68	8.48	13.6	11.19	9.19	8.14	10.77	14.9	10.01	9	15.58	11.5	12.09	9.08	11.34	13.29	13.54	7.07	11.27	10.7	8.28	10.22	10.05	12.66	11.55	6.54
ENSMMUG00000000097	36.12	31.68	40.25	35.16	32.28	29.41	32.81	34.98	34.04	34.52	34.37	34.34	31.04	29.39	32.75	30.8	29.29	26.85	34.76	35.74	31.29	25.1	28.85	29.06	33.43	32.08	42.22	33.85	30.41	29.32	34.87	34.71	26.62	23.43	33.57	28.02	30.26	22	23.71	28.2	27.05	33.9	37.05	33.79	30.53	29.28	33.45	29.65	37.99
ENSMMUG00000000098	0.84	0.92	1.01	1.33	1.15	1.26	2.31	1.1	1.46	1.2	1.91	2.54	1.75	1.79	3.25	1.98	1.57	2.08	1.87	2.39	1.61	2.18	4.04	1.63	1.51	1.6	0.97	1.43	1.58	1.95	2.77	1.53	0.7	0.71	0.55	1.11	1.09	0.67	0.65	0.79	5.3	5.06	4.05	4.81	6	5.43	7.39	6.09	4.2
ENSMMUG00000000099	0.01	0.02	0.01	0	0.02	0.02	0.03	0	0	0.04	0.06	0	0	0	0	0	0	0	0.01	0.01	0	0.01	0	0	0	0	0	0.01	0	0	0	0	0	0.03	0.01	0.05	0	0.03	0	0.01	0.03	0.02	0	0.01	0	0.01	0	0	0
ENSMMUG00000000100	21.67	20.04	26.9	23.73	20.35	25.49	18.83	22.47	44.21	37.88	44.35	38.29	36.51	34.28	31.63	31.94	32.35	32.87	29.59	40.63	28.76	26.23	26.18	19.61	22.13	19	19.46	19.47	25.02	27.81	22.99	21.21	8.55	7.31	8.08	7.15	7.69	7.82	8.33	6.98	53.84	49.57	27.27	26.58	24.26	25.6	21.22	24.56	62.94
ENSMMUG00000000101	0.03	0.14	0.12	0.1	0.05	0.08	0.25	0.11	0.04	0.03	0.09	0.04	0.04	0.06	0	0.23	0.03	0	0.46	0.05	0.06	0.16	0.07	0.03	0.03	0.07	0.17	0.31	0.08	0	0	0	0.23	0.06	0.03	0	0.04	0.08	0.1	0.23	0.13	0.05	0.28	0.05	0	0.1	0.11	0.04	0.09
ENSMMUG00000000102	0.27	0.46	0.05	0.29	0.12	0.2	0.12	0.13	0.25	0.43	0.08	0.14	0.11	0.11	0.15	0.17	0.13	0.31	0.09	0.19	0.09	0.16	0.11	0.1	0.21	0.34	0.1	0.08	0.07	0.01	0.06	0.03	0.27	0.27	0.19	0.16	0.19	0.22	0.15	0.18	0.18	0.32	0.14	0.2	0.12	0.14	0.19	0.21	0.41
ENSMMUG00000000104	3.64	4.36	3.87	3.7	3.4	4.08	3.39	3.7	3.92	4.15	4.74	4.84	4.18	5.62	5.05	5.58	3.06	3.59	4.02	3.49	3.07	4.21	4.05	3.98	3.76	3.89	3.79	3	2.86	4.46	4.07	3.51	7.18	9.14	8.35	8.22	8.57	8.52	9.23	8.3	8.48	9.67	9.74	8.37	7.73	8.74	9.29	9.19	6.67
ENSMMUG00000000105	2.32	1.88	4.15	2.04	1.09	1.3	1.54	2.03	4.11	1.91	4.16	4.28	1.96	2.52	2.67	3.17	2.81	2.42	3.59	3.83	2.2	3.05	3.45	2.72	3.24	2.59	4.66	3.14	2.21	3.14	3.37	3.18	1.71	1.81	1.86	2.54	1.88	1.55	1.65	2.23	3.9	1.36	4.47	3.17	1.39	4.55	3.63	2.62	4.05
ENSMMUG00000000107	0.57	0.6	0.58	0.51	0.53	0.44	0.41	0.52	0.52	0.51	0.42	0.45	0.48	0.4	0.33	0.52	0.47	0.42	0.54	0.37	0.31	0.44	0.32	0.4	0.48	0.52	0.52	0.36	0.3	0.44	0.37	0.51	1.91	2.01	2.04	1.82	2.12	1.9	1.89	1.94	1.49	1.61	1.69	1.36	1.45	1.23	1.58	1.46	1.24
ENSMMUG00000000108	1.94	2.08	2.67	1.67	1.1	1.21	1.51	1.18	2.27	1.25	2.04	1.32	1.3	1.24	1.47	1.16	1.92	1.81	1.85	1.66	1.06	1.04	1.56	0.93	2.26	2.18	3.47	2.51	1.84	3.62	2.36	2.85	1.11	0.99	1.21	0.93	1.03	1.47	0.99	1	2.03	1.49	1.86	1.43	0.97	1.43	1.82	1.22	2.48
ENSMMUG00000000109	0.05	0.16	0.08	0.06	0.06	0.05	0.09	0.08	0.06	0.03	0.02	0.05	0.02	0.04	0.05	0.03	0.05	0.01	0.01	0	0	0.01	0.02	0	0.03	0.04	0.02	0.05	0.09	0.01	0.05	0.04	0.08	0.05	0.09	0.07	0.03	0.02	0.01	0.06	0.09	0.16	0.04	0.01	0.04	0.05	0.01	0.06	0.11
ENSMMUG00000000110	2.41	2.09	2.11	2.49	2.13	2.05	2.69	3.44	1.74	1.9	3.05	2.55	3.75	3.36	3.86	4.19	1.46	1.39	2.33	2.07	2.82	3.35	4.95	3.9	2.7	1.79	2.58	3.14	2.21	4.07	3.15	3.54	3.84	4.4	4.42	5.48	5.45	6.16	5.89	7.54	2.74	2.64	3.52	4.15	4.25	4.69	4.65	5.32	2.08
ENSMMUG00000000111	6.41	6.29	8.67	10	12.3	10.93	7.13	8.82	9.08	8.86	12.19	10.92	13.99	12.99	14.46	13.53	6.46	5.75	8.59	11.81	10.17	8.93	15.06	8.66	4.9	5.32	4.88	6.31	5.31	6.15	7.15	4.48	2.07	2.62	2.57	3.55	6.53	7.18	7.69	5.72	15.46	14.29	14.01	14.78	13.72	16.05	14.38	14.13	16.77
ENSMMUG00000000112	0	0	0	0	0	0	0	0	0	0	0	0	0	0	0	0	0	0	0	0	0	0	0	0	0	0	0	0	0	0	0	0	0.13	0	0.06	0.07	0	0	0.04	0.08	0	0	0.07	0	0	0	0	0	0.03
ENSMMUG00000000113	96.8	83.9	150.09	140.99	141.9	123.63	83.99	99.24	103.75	61.96	96.26	84.31	104.85	90.4	97.7	85.59	101.67	75	62.11	95.45	80.85	65.97	77.58	58.78	71.45	55.32	44.25	76.28	73.11	71.25	64.7	58.22	80.65	89.77	55.79	74.01	82.62	80.96	60.97	63.96	111.79	71.82	71.53	90.4	87.49	76.05	103.35	77.67	192.54
ENSMMUG00000000114	0	0	0.02	0.06	0.02	0	0.02	0	0	0	0.04	0.03	0	0	0	0	0.1	0.02	0	0	0.02	0.02	0	0	0	0	0.03	0	0	0	0.08	0	0.07	0.02	0	0.06	0	0.03	0.03	0.03	0	0.04	0.02	0.02	0.04	0	0	0	0.03
ENSMMUG00000000115	0	0	0	0	0.02	0	0	0	0	0.04	0	0	0	0	0.02	0.15	0	0	0	0.06	0	0.04	0	0	0	0	0	0	0	0	0	0	0.06	0.02	0.02	0	0.03	0.03	0	0.05	0	0	0	0	0	0	0	0	0.05
ENSMMUG00000000116	2.94	2.22	2.62	2.57	2.82	2.8	2.34	2.59	2.11	2.09	2.36	1.81	2.42	2.15	1.65	1.75	3.02	2.54	2.51	1.62	2.85	2.05	1.89	2.84	2.96	3.27	2.89	2.96	3.36	3.06	2.12	2.24	2.08	2.09	2.86	1.44	2.14	1.99	2.29	2.51	1.93	1.52	1.54	1.02	1.74	1.16	1.48	1.37	1.94
ENSMMUG00000000117	0.94	0.77	1.24	0.79	0.56	0.45	0.72	0.5	1.01	0.62	1.12	0.72	0.52	0.68	0.72	0.89	1.14	0.57	0.9	1.09	0.59	1.09	0.96	0.62	1.32	0.95	1.35	1.24	1.51	2.03	1.21	1.92	0.73	0.75	0.64	0.67	0.93	1	0.89	0.85	1.16	0.78	0.94	0.86	0.55	0.85	0.95	0.55	1.49
ENSMMUG00000000118	0.72	0.66	0.66	0.65	0.65	0.62	0.54	0.55	0.37	0.47	0.64	0.59	0.6	0.55	0.59	0.6	0.36	0.38	0.41	0.53	0.42	0.47	0.55	0.47	0.58	0.55	0.59	0.51	0.5	0.54	0.6	0.38	1.16	1.44	1.31	1.51	1.23	1.37	1.27	1.51	1.02	1	1.09	1.03	0.82	0.97	0.77	1.14	0.72
ENSMMUG00000000120	0	0.6	0.03	0	0	0.06	0	0	0	0.04	0	0	0	0.2	0	0	0	0.27	0.12	0	0.17	0	0	0	0	0.24	0	0.21	0	0	0	0	0.05	0.29	0	0	0	0	0	0	0.03	0.21	0	0	0	0	0	0	0
ENSMMUG00000000121	0.02	0.03	0.05	0.05	0.02	0.06	0.04	0.03	0.07	0.03	0.09	0.08	0.08	0.13	0.03	0.05	0.05	0.01	0	0.07	0.05	0.04	0.06	0.03	0.02	0.04	0.04	0.05	0.05	0.01	0.04	0.01	0.06	0.09	0.07	0.01	0.09	0.03	0.05	0.07	0.1	0.13	0.14	0.03	0.13	0.25	0.08	0.1	0.17
ENSMMUG00000000122	6.81	5.51	11.4	10.26	7.84	10.71	7.89	8.64	4.12	1.72	4.82	3.12	3.73	5.04	4.9	4.12	6.05	3.8	6.06	4.89	4.66	5.88	5.63	6.08	5.14	3.36	10.61	5.79	7.09	9.76	7.14	7.25	7.4	7.09	9.72	7.74	7.92	10.3	7.93	9	5.63	2.92	5.32	5.07	5.21	6.17	6.08	5.61	5.12
ENSMMUG00000000123	6.77	7.48	6.07	7.7	7.88	8.17	5.58	6.48	2.08	2.01	2.12	2.4	2.62	2.76	3.25	2.72	1.88	1.96	2.43	2.18	3.49	2.96	3.57	2.44	2.54	3.14	3.97	4.45	5.37	4.37	4.68	4.29	4.82	4.79	4.19	3.9	4.62	4.39	4.13	4.37	2.06	2.55	2.53	2.62	3.14	2.68	3.37	3.04	2.29
ENSMMUG00000000124	0	0	0	0	0	0	0	0	0	0	0	0	0	0	0	0	0	0	0	0	0	0	0	0	0	0	0	0	0	0	0	0	0.06	0.03	0.02	0.1	0.01	0.01	0.05	0.04	0.08	0.02	0.09	0.07	0.02	0.01	0.04	0.11	0.05
ENSMMUG00000000125	6.22	5.38	6.88	6.41	5.03	4.74	4.42	6.02	5.24	3.67	4.83	5.26	4.67	4.54	5.25	4.79	5.34	3.61	4.93	5.06	5.49	5.53	4.77	4.45	5.33	4.86	6.74	4.92	5.79	5.4	5.58	6.05	5.45	4.88	5.7	5.39	4.94	4.87	4.92	6.08	6.02	5.67	6.93	6.34	6.42	5.99	7.24	7.29	5.76
ENSMMUG00000000126	37.46	32.8	38.38	34.49	32.55	29.66	27.38	30.22	51.62	43.74	56.03	53.25	66.08	64.14	61.09	49.5	49.77	39.54	41.04	44.68	54.59	52.48	64.99	50.81	39.37	38.57	45.09	36.58	47.07	49.17	40.58	37.68	34	29.79	27.73	34.5	39.06	38.99	33.82	30.32	71.04	63.37	59.49	69.59	75.37	72.68	73.24	63.58	66.09
ENSMMUG00000000127	0	0	0	0	0	0	0	0	0	0	0	0	0	0	0	0	0	0	0	0	0	0	0	0	0	0	0	0	0	0	0	0	1.3	0.75	0.56	1.31	0.54	0.88	0.36	0.61	0.01	0.05	0.03	0.14	0.04	0	0.07	0.03	0.08
ENSMMUG00000000128	0.01	0.01	0.01	0.01	0.01	0.01	0.02	0.01	0	0.01	0	0.01	0	0	0	0.03	0.01	0.02	0	0	0.01	0.01	0.03	0	0.02	0.01	0.02	0.01	0.02	0.03	0.01	0	0.03	0.01	0.03	0	0.01	0	0.01	0	0	0.01	0	0	0.01	0.01	0.01	0	0
ENSMMUG00000000129	0.4	0.2	0.28	0.28	0.21	0.13	0.19	0.24	0.53	0.28	0.4	0.21	0.17	0.18	0.17	0.25	0.2	0.16	0.28	0.3	0.1	0.22	0.23	0.19	0.41	0.39	0.56	0.36	0.53	0.51	0.18	0.29	0.27	0.3	0.26	0.2	0.17	0.14	0.24	0.19	0.74	0.56	0.69	0.35	0.38	0.32	0.29	0.45	0.22
ENSMMUG00000000130	1.58	1.4	2.98	1.45	0.79	1.14	1.32	1.24	7.25	8.14	9.57	9.39	7.51	7.96	8.82	7.61	3.84	4.11	6.82	6.81	4.9	5.05	5.59	5.75	3.64	3.5	3.1	2.82	1.73	2.32	3.23	2.11	1.73	2.18	2.22	2.6	1.57	1.6	2.01	1.88	20.19	22.79	15.6	18.28	12.83	17.92	19.32	17.4	14.49
ENSMMUG00000000131	5.28	5.89	9.77	5.11	4.15	3.9	8.4	7.02	3.39	1.83	3.99	2.74	4.5	4.44	4.79	4.68	3.77	3.95	5.39	3.39	5.78	6.22	8.26	6.35	12.46	10.98	23.79	16.9	16.29	28.06	16.31	23.14	3.12	3.1	3.99	3.33	5.07	6.03	7.01	5.05	4.33	2.84	6.01	5.15	5.81	5.44	9.58	7.74	3.71
ENSMMUG00000000133	0.01	0	0	0.02	0	0.02	0	0	0	0.01	0.03	0	0.01	0	0	0.02	0.01	0	0	0	0	0	0	0	0.01	0	0	0.04	0	0	0	0	0.04	0.02	0.04	0	0	0.01	0	0.03	0.01	0	0	0	0	0	0.02	0.01	0
ENSMMUG00000000134	99.29	105.13	109.72	95.98	95.32	84.46	85.52	99.27	71.35	80.02	82.92	80.87	81.03	84.14	88.33	80.97	59.68	66.43	90.22	81.02	95.19	71.31	71.66	84.8	64.31	70.71	97.34	76.39	97.86	75.95	80.34	90.51	73.11	68.09	90.97	77.24	97.78	85.99	82.2	102.24	45.37	61.67	76.86	65.08	74.11	58.58	73.01	71.44	74.54
ENSMMUG00000000135	15.6	16.27	14.5	15.7	17.54	18.2	13.23	17	11.88	11.04	8.78	9.46	7.96	7.81	8.06	7.67	8.7	9.38	9.09	10.5	8.39	6.75	8.9	7.46	9.03	9.34	9.95	10.53	10.63	8.98	12.6	10.2	11.74	10.62	12.28	10.5	11.16	10.38	11.42	10.08	17.48	18.89	17.02	15.98	15.33	16.91	15.7	14.4	18.88
ENSMMUG00000000136	1.69	2.09	1.2	1.67	2.06	1.94	1.77	1.92	0.91	1.11	0.75	0.88	0.98	1	1.5	1.18	0.73	0.73	0.93	0.78	0.97	0.9	1.38	1.26	1.25	1.28	1.74	1.51	1.67	1.38	1.75	1.88	7.76	8.59	9.18	9.16	9.01	8.94	8.11	9.74	4.6	5.44	5.91	5.55	5.64	6.36	7.01	5.83	4.42
ENSMMUG00000000137	329.36	273.7	378.36	348.01	329	317.07	300.87	299.24	412.12	412.23	576.43	497.86	628.92	642.47	645.86	529.13	434.92	322.67	375.83	421.78	543.1	522.42	771.32	554.37	291.59	245.83	214.05	195.54	206.79	242.72	253.87	178.67	380.97	353.78	379.42	418.03	504.6	496.92	473.27	432.58	584.28	477.27	560.14	618.08	617.05	688.16	608.75	641.6	438.52
ENSMMUG00000000138	2.41	2.47	2.66	2.76	2.41	1.92	1.9	1.95	3	2	2.8	2.57	2.49	1.93	2.22	2.07	2.13	1.74	1.25	2.69	2.63	2.01	1.58	1.75	2	2.16	2.8	2.4	2.95	2.59	3.29	2.5	11.96	13.38	14.06	15.27	18.38	19.27	18.65	19.34	10.55	9.54	9.52	10.23	12.63	10.07	9.7	11.25	9.93
ENSMMUG00000000140	16.24	15.32	16.02	17.47	15.82	15.91	13.2	14.33	13.42	13.43	12.47	13.95	11.22	12.19	11.44	11.03	13.23	12.82	11.44	13.37	13.35	11.7	12.68	11.7	16.28	16.21	17.31	19.56	20.4	19.24	16.52	17.5	33.77	38.27	32.84	37.5	36.08	42.2	37.61	34.43	19.07	19.3	17.05	19.38	18.37	17.46	17.54	18.42	21.12
ENSMMUG00000000141	31.74	30.66	28.91	29.6	31.34	32.1	27.93	32	28.87	27.48	20.23	25.59	28.2	26.87	32.97	25.87	17.93	15.58	17.11	23.24	21.52	18.57	20.45	21.28	19.13	21.92	24.33	21.56	25.02	28.85	28.58	26.45	22.37	18.27	18.96	18.54	20.19	17.85	17.44	22.66	21.18	28.21	23.08	24.88	25.78	25.22	36.49	27.77	26.45
ENSMMUG00000000142	0	0	0	0	0	0	0	0	0	0	0	0	0	0	0	0	0	0	0	0	0	0	0	0	0	0	0	0	0	0	0	0	0.35	0.32	0.39	0	0.23	0.16	0.03	0.13	7.64	4.4	2.96	4.48	8.31	7.04	4.04	3.78	6.38
ENSMMUG00000000143	11.14	10.93	12.84	10.89	9.61	9.04	9.19	10.33	8.35	6.98	8.44	8.22	7.6	7.13	8.82	8.17	8.58	8.81	9.85	8.45	9.19	7.63	8.42	8.7	10	10.59	11.48	10.5	9.06	9.76	9.42	9.91	14.14	12.21	15.48	13.53	11.67	10.98	11.78	12.75	8.88	9.77	12.26	9.4	8.67	8.93	10.57	9.11	10.38
ENSMMUG00000000144	4.5	4.37	5.39	4.72	3.67	3.88	3.41	3.89	7.39	5.69	7.05	7.62	6.62	7.58	6.89	6.08	6.67	5.11	5.6	7.78	6.42	6.31	6.23	5.46	5.47	4.28	3.62	3.49	4.01	4.86	3.63	3.58	8.06	9.06	8.37	9.23	9.64	11.49	7.52	9.57	10.65	8.71	8.26	8.02	7.27	9.98	5.45	6.49	9.46
ENSMMUG00000000145	5.46	3.56	2.97	3.23	2.41	1.08	1.56	2.22	2.9	1.15	2.14	3.01	2.98	1.63	3.2	1.95	2.2	1.86	1.15	2.29	2.05	2.16	2.04	1.07	2.62	2.24	3.83	4.83	3.12	5.04	2.76	3.03	7.95	4.67	4.43	7.05	6.4	6.33	5.07	4.4	2.71	2.21	2.74	2.35	2.21	4.12	2.87	4.1	3.64
ENSMMUG00000000146	0.23	0.06	0.26	0.08	0.14	0.16	0.24	0.14	0.67	0.56	0.73	0.53	0.65	0.93	0.61	0.82	0.86	0.83	0.93	0.81	1.02	0.94	1.21	1.19	0.96	0.77	0.75	0.42	0.12	0.56	0.26	0.07	7.54	5.92	7.8	8.08	8.28	7.84	7.97	6.37	3.64	2.97	3.66	3.55	3.91	6.83	2.96	4.83	0.93
ENSMMUG00000000147	0	0	0	0	0	0	0	0	0	0	0	0	0	0	0	0	0	0	0	0	0	0	0	0	0	0	0	0	0	0	0	0	0	0.04	0	0	0	0	0	0	0.1	0.02	0.2	0.02	0	0	0.03	0	0
ENSMMUG00000000148	0	0	0.01	0	0	0.04	0	0.01	0	0	0	0.02	0.01	0	0.02	0	0.01	0	0	0.01	0	0.05	0	0	0	0	0	0	0	0.01	0	0.03	0.02	0.01	0.02	0.02	0.03	0.04	0.03	0.03	0	0.01	0	0.02	0	0	0	0	0
ENSMMUG00000000149	39.2	39.64	38.89	39.88	31.78	31.28	27.73	34.93	32.48	27.58	34.72	34.81	30.97	34.84	33.81	28.97	31.23	24.59	25.6	30.14	26.47	26.36	28.67	23.54	26.56	22.4	32.37	33.87	38.14	40.73	34.43	35.52	13.69	13.09	12.96	14.63	16.93	18.91	12.75	13.7	31.69	24.7	22.88	28.32	25.25	24.65	28.09	22.9	34.9
ENSMMUG00000000151	0.01	0	0	0.02	0	0.01	0.01	0.01	0.04	0.05	0.06	0.06	0.02	0.01	0.01	0.01	0.04	0.02	0	0.02	0.03	0.03	0.02	0	0.01	0.01	0	0.03	0	0	0.02	0.02	0.01	0.03	0.01	0.01	0	0.04	0.03	0.01	0	0.02	0.02	0.01	0	0.01	0.05	0	0.06
ENSMMUG00000000152	11.28	12.82	13.26	11.97	14.18	12.44	10.94	12.92	11.9	13.43	13.73	14.33	13.08	13.23	13.18	12.62	10.72	9.95	11.35	12.84	12.39	9.26	10.58	11.19	10.59	11.95	12.3	12.02	12.1	10.75	12.7	12	20.58	23.57	19.18	22.87	25.3	25.24	21	24.59	19.85	22.21	20.89	21.14	21.23	18.5	20.85	20.15	17.53
ENSMMUG00000000153	1.45	1.28	1.11	1.77	1.77	1.52	1.57	1.65	0.66	0.68	1.41	1.23	1.69	1.67	1.96	1.61	0.79	0.47	1.14	1.11	1.59	1.31	1.95	1.14	0.84	0.53	1.2	1.43	1.13	1.36	1.78	1.02	2.18	2.19	2.89	3.54	3.1	4.03	3.86	3.53	0.98	0.52	1.54	1.55	1.6	2.18	1.6	1.78	0.79
ENSMMUG00000000154	0.16	0.21	0.64	0.22	0.59	0.15	0	0.31	0.31	0.29	0.28	0.26	0.25	0.5	0	0	0.08	0.15	0.53	0	0.59	0.32	0.29	0.5	0.49	0.2	0	0.13	0.23	1.13	0.16	0	0.93	0.09	0.66	0.75	0.53	0.94	0.49	0.72	0.96	0.22	0.38	0.75	0.46	0.33	0.64	0.27	0.41
ENSMMUG00000000156	0	0	0	0	0	0	0	0	0	0	0	0	0	0	0	0	0	0	0	0	0	0	0	0	0	0	0	0	0	0	0	0	15.97	17.25	15.31	18.77	20.56	21.55	20.21	18.36	16.61	13.91	16.13	16.9	16.31	15.25	16.2	16.53	15.02
ENSMMUG00000000157	0.04	0.02	0.02	0	0.01	0	0.02	0.03	0.01	0.04	0.05	0.04	0.05	0.04	0.05	0.01	0	0.02	0.02	0	0.01	0	0.01	0.04	0.01	0	0.08	0.02	0.01	0.04	0.01	0.03	0.03	0.02	0.02	0.01	0.06	0.02	0	0.01	0	0.01	0.01	0.01	0	0.11	0	0.02	0
ENSMMUG00000000158	0.94	1.08	1.1	0.82	1.36	1.21	0.81	1.08	0.79	0.58	1.61	0.73	1.66	1.68	1.41	1.4	0.56	0.54	0.89	1.01	1.18	1.11	0.96	0.94	0.77	0.69	1.05	0.79	0.9	1.39	1.2	0.99	3.51	3.84	3.44	3.49	3.92	5.51	4.21	4.42	1.09	0.96	1.78	1.31	1.89	1.93	2.23	2.19	0.92
ENSMMUG00000000159	49.86	47.21	45.05	45.51	44.6	36.65	34.22	37.8	61.41	47	60.68	58.2	79.32	73.44	78.83	59.03	55.96	41.74	39.15	50.3	54.08	45.38	60.12	47.04	38.26	39.72	39.2	43.18	48.04	52.69	44.05	42.18	53.55	57.55	51.03	56.92	71.7	67.16	62.85	63.77	60.29	55.32	51.42	54.75	72.12	51.04	60.51	53.99	63.75
ENSMMUG00000000161	0.57	0.57	0.21	0.46	0.11	0.03	0.24	0.21	0.27	0.22	0.91	0.4	0.64	0.92	0.89	0.32	0.21	0.3	0.58	0.65	0.14	0.25	0.21	0.24	1.27	0.46	1.57	1.24	1.17	1.98	1.07	1.22	0.26	0.32	0.48	0.19	0.94	1	1.98	2.8	0.26	0.15	0.72	0.36	0.44	1.39	0.77	1.02	0.17
ENSMMUG00000000162	3.24	4.15	5.22	3.93	3.48	4.09	3.99	4.54	3.69	3.42	3.1	3.29	3.37	4.1	3.89	4.48	1.97	2.26	4.05	3.97	2.91	3.2	3.64	6.16	4.15	4.24	5.62	4.68	4.07	3.83	4.88	6.55	5.81	6.9	9.21	7.06	7.06	7.29	5.82	9.58	4.01	5.26	7.06	5.86	5.41	6.48	7.05	6.43	4.75
ENSMMUG00000000163	0.04	0.03	0.08	0.03	0.04	0.01	0.03	0.05	0.51	0.51	0.39	0.35	0.42	0.4	0.52	0.43	0.23	0.36	0.24	0.24	0.32	0.29	0.23	0.42	0.08	0.11	0.02	0.05	0.03	0.06	0.06	0.05	0.06	0.05	0.06	0.12	0.02	0.06	0.06	0.07	0.08	0.13	0.37	0.11	0.18	0.31	0.34	0.27	0.43
ENSMMUG00000000164	74.37	71.48	69.59	65.75	55.78	65.71	47.57	57.06	66.04	57.47	79.21	57.73	61.06	81.36	71.01	65.44	49.73	38.63	47.17	49.44	45.04	56.66	74.17	58.01	49.45	43.99	66.26	62.53	62.35	73.15	65.42	61.46	76.01	84.47	73.69	88.2	84.27	107.96	97.01	81.01	49.91	42.16	59.89	66.45	50.58	72.56	68.38	67.27	54.27
ENSMMUG00000000165	21.59	25.95	25.52	21.82	15.92	14.91	13.68	14.4	22.02	18.78	19.93	19.46	18.16	17.66	23.27	17.66	34.17	28.21	26.37	31.99	24.12	22.62	24.53	27.43	26.59	23.59	41.89	32.77	31.67	31.38	26	26.04	28.04	28.06	33.91	28.34	33.03	26.02	24.15	34.61	28.97	34.74	29.54	29.73	35.29	27.08	34	30.32	30.4
ENSMMUG00000000166	10.82	8.99	10.85	11.35	11.15	10.13	9.85	11.11	12.48	11.45	16.42	15.26	17.27	17.44	18.77	16.42	14.25	12.21	12.86	13.27	15.15	13.92	20.06	14.48	11.37	10.64	11.2	11.23	10.58	13.47	12.25	11.07	27.45	25.97	21.84	23.41	24.36	29.78	27.08	23.72	17.91	16.47	15.26	21.59	21.7	16.29	23.4	21.5	14.95
ENSMMUG00000000167	4.18	4.24	4.17	4.02	4.47	4.72	3.62	3.67	2.36	2.35	2.98	2.45	2.61	2.72	2.8	2.89	2.23	2.03	2.94	1.99	2.16	3.02	3.03	2.35	2.28	2.62	2.64	2.79	4.1	4.15	3.7	3.28	5.21	6.47	5.08	6.18	5.42	7.1	6.08	6.3	4.9	4.25	4.85	5.08	4.63	5.32	4.51	5.74	3.59
ENSMMUG00000000168	11.3	8.88	15.3	12.01	7.21	7.44	6.63	7.7	29.82	18.24	25.9	29.02	24	24.19	18.79	21.41	30.23	24.51	15.85	21.45	17.12	20.37	18.15	18.93	25.26	20.43	16.18	15.84	13.81	14.89	9.13	10.42	34.01	35.76	30.6	28.87	33.58	41.95	30.17	33.83	27.68	26.85	22.55	28.9	23	25.51	22.33	24.9	36.35
ENSMMUG00000000169	14.46	12.78	15.24	13.76	13.34	13.5	12.17	14.09	15.56	14.76	19.18	18.9	17.94	20.21	20.08	18.42	15.1	10.81	16.03	17.82	13.55	16.8	17.29	15.33	13.54	12.51	14.62	12.8	14.25	16.04	14.58	14.03	18.36	20.11	17	22.39	20.59	26.42	21.1	23.33	20.66	19.54	17.66	23.33	19.76	20.37	21.38	21.73	18.88
ENSMMUG00000000170	0.05	0.05	0.15	0.06	0.05	0.05	0.24	0.09	0.04	0.08	0.03	0.13	0.08	0.11	0.19	0.1	0.06	0.12	0.09	0.11	0.06	0.1	0.17	0.04	0.05	0.05	0.06	0.06	0.04	0.05	0.22	0.1	0.06	0.06	0.07	0.1	0.06	0.03	0.22	0.09	0.03	0.06	0.11	0.07	0.11	0.05	0.17	0.09	0.07
ENSMMUG00000000171	7.77	7.35	7.42	7.48	8.82	8.52	7.61	7.39	8.12	8.65	9.9	9.75	11.04	11.03	12.54	10.13	7.49	6.5	8.1	8.19	9.04	9.16	11.76	8.08	7.66	7.63	7.35	7.11	8.45	10.67	10.02	7.77	13.39	15.65	14.97	17	16.82	21.54	17.93	18.4	9.89	9.46	9.65	9.77	10.64	10.63	11.02	11.38	8.36
ENSMMUG00000000172	1.1	0.95	1.48	1.13	0.89	0.95	1.15	1.28	0.97	0.72	1.15	0.72	1.01	1.43	1.03	1.31	1.34	0.88	1.31	1.14	1.42	1.24	1.7	2.01	2.55	2.32	3.1	2.18	2.94	3.94	2.84	2.74	4.27	3.81	2.95	3.19	4.2	3.92	4.22	3.69	2.05	1.92	1.94	2.34	2.44	2.24	2.96	2.56	1.86
ENSMMUG00000000173	6.31	6.87	6.81	6.27	7.54	6.97	6.85	6.72	5.34	5.65	5.94	5.86	5.52	5.74	5.58	5.51	4.96	5.18	6.23	5.93	5.55	5.12	6.13	5.27	5.68	6.26	7.1	6.65	5.61	7.31	7.83	6.46	10.18	11.5	10.04	10.88	10.71	10.3	10.08	10.06	7.29	8.95	9.01	8.73	7.96	7.94	7.99	8.92	6.79
ENSMMUG00000000174	0.52	0.74	0.82	0.74	0.81	0.82	0.75	0.55	0.81	0.5	0.86	0.5	0.51	0.61	0.77	0.35	0.68	0.22	0.67	0.65	0.54	0.64	0.56	0.1	0.51	0.39	0.38	0.44	0.43	0.74	0.79	0.42	1.42	1.35	0.78	0.86	1.2	1.24	1.22	1.08	0.99	0.78	0.74	0.6	0.53	0.64	0.91	0.35	1.02
ENSMMUG00000000175	0.2	0.04	0	0.04	0	0.02	0	0.04	0.03	0	0	0	0	0	0	0.06	0.06	0.06	0.02	0	0	0.1	0	0	0.02	0.03	0	0.07	0	0.07	0.04	0	0	0.12	0	0	0.1	0	0	0.03	0.04	0.07	0	0.14	0.1	0.14	0	0.02	0
ENSMMUG00000000177	0.5	0.53	0.51	0.57	0.42	0.57	0.16	0.54	0.78	0.48	0.55	0.84	0.44	0.6	0.87	0.68	0.37	0.18	0.44	0.57	0.47	0.26	0.91	0.7	0.19	0.33	0.46	0.5	0.37	0.25	0.17	0.4	0.02	0.05	0	0.04	0	0.02	0	0.13	0.43	0.18	0.24	0.1	0.11	0.07	0.2	0.24	0.34
ENSMMUG00000000178	0.03	0	0.12	0.03	0.05	0.08	0	0.06	0.07	0.03	0.1	0	0	0.12	0.04	0	0	0	0	0.02	0.03	0.03	0	0.09	0.45	0.14	0.13	0.28	0.29	0	0.11	0.11	0.13	0.11	0.1	0	0.05	0	0.04	0.04	0.13	0	0	0.4	0	0.29	0.06	0	0.02
ENSMMUG00000000179	0.22	0	0.24	0.13	0.02	0.19	0.28	0.12	0	0.06	0.13	0.08	0	0.16	0	0	0	0	0.12	0	0.05	0.15	0.02	0.03	0	0.06	0.08	0	0.11	0	0	0.14	1.23	0.69	0.28	0.64	0	0.49	0.31	0.38	0.28	0	0.12	0.3	0.5	0.08	0.29	0.06	0
ENSMMUG00000000180	1.49	1.91	1.1	0.99	0.68	0.54	0.56	0.75	2.14	2.27	2.01	2.39	1.34	1.62	1.1	1.04	1.87	1.3	0.84	1.47	0.84	1.11	0.91	0.73	2.19	1.67	0.76	1.14	0.78	0.98	0.87	0.86	1.22	1.43	0.85	0.4	0.94	0.7	0.41	0.63	1.67	2.18	1.15	2.02	0.69	1.29	0.64	0.96	2.5
ENSMMUG00000000181	2.12	1.71	3.67	2.28	3.41	2.83	1.89	2.15	7.85	7.9	5.59	5.26	4.62	4.25	4.65	4.47	4.88	4.66	4.11	5.63	3.3	2.79	3.45	3.46	2.55	2.98	1.86	1.22	0.9	1.11	1.53	1.09	29.01	22.35	22.73	23.58	18.66	15.79	17.97	13.42	150.47	153.02	83.72	68.86	82.71	63.18	61.09	50.16	147.99
ENSMMUG00000000182	6.4	6.53	7.1	7.05	6.83	6.92	5.56	6.15	5.56	4.68	7.38	6.72	6.04	7.03	6.79	6.96	4.47	4.21	5.25	6.05	4.87	5.56	7.15	5.43	5.63	5.81	6.52	5.51	6.34	7.39	6.09	6.21	28.66	28.14	34.36	30.72	32.8	34.24	34.94	33.38	16.82	16.68	21.9	19.66	22.15	20.53	22.07	22.12	14.3
ENSMMUG00000000183	0	0	0	0	0	0	0	0	0	0	0	0	0	0	0	0	0	0	0	0	0	0	0	0	0	0	0	0	0	0	0	0	7.76	7.63	9.87	8.16	7.57	11.55	7.44	8.42	13.5	12.25	12.29	11.08	14.03	14.92	13.83	13.44	13.13
ENSMMUG00000000184	2.42	2.42	2.79	2.28	2.21	2.25	1.63	2.46	2.34	1.4	2.42	2.46	2.71	2.01	2.29	2.38	1.85	1.67	2.04	1.89	1.68	2.13	1.71	1.6	2.14	2.75	2.68	2.41	2.24	3.03	2.26	2.51	27.43	25.53	22.26	23.68	23.12	22.47	20.05	23.06	12.98	13.85	13.6	12.69	13.29	10.73	13.81	11.97	9.21
ENSMMUG00000000185	0.74	1.06	1.92	1.77	1.74	1.12	0.75	1.43	2.27	2.74	2.73	2.13	2.68	2.05	2.74	2.52	1.35	0.87	1.83	2.06	1.31	1.33	2.65	1.21	1.09	0.97	1.21	1.27	1.28	0.79	1.1	1.12	0.56	0.58	0.67	0.59	0.51	0.36	0.74	0.63	2.37	2.99	3.77	2.79	2.9	3.73	2.59	3.84	2.84
ENSMMUG00000000186	18.17	18.05	22.69	16.65	16.41	16.71	14.51	17.93	21.4	19.37	17.73	20.78	17.04	17.18	19.41	19.35	18.72	17.03	19.04	19.64	17.09	14.38	13.33	16.36	19.6	18.66	19.42	17.16	15.42	17.42	17.82	19.14	33.48	31.36	29.14	26.62	26.02	23.17	22.85	25.99	26.31	27.92	26.74	25.94	22.3	24	27.28	24.66	27.39
ENSMMUG00000000187	3.44	3.24	4.37	3.06	3.32	2.99	3.38	3.19	4.23	3.86	4.37	4.97	4.07	3.79	3.78	3.83	3.21	2.78	3.34	3.95	3.39	3.2	3.58	4.33	3.03	3.44	3.92	3.5	3.86	3.24	3.57	3.3	19.85	22.42	23.32	21.99	20.75	18.83	21.65	21.68	14.35	18.35	15.83	15.46	14.39	15.61	16.11	14.48	13.07
ENSMMUG00000000188	15.62	16.97	19.04	20	22.32	23.65	20.7	21.53	13.39	15.51	17.36	16.43	18.46	21.28	19.44	19.38	14.68	13.82	20.29	16.66	15.55	17.7	17.24	17.49	16.04	16.94	17.91	16.67	14.3	21.17	20.65	16.23	23.52	28.06	27.13	27.55	26.49	31.88	31.14	28.52	19.95	21.78	24.1	20.71	21.06	23.26	20.7	21.08	17.41
ENSMMUG00000000190	3	3.63	3.77	2.69	3.01	2.72	2.76	3.16	4.36	5.3	3.68	4.1	2.59	3.44	3.39	3.16	2.36	2.18	3.11	2.47	2.03	2.05	2.73	2.5	3.79	3.39	3.8	3.26	2.96	2.76	3.15	4.1	16.97	15.23	14.35	16.44	14.55	14.49	15.55	17.21	9.2	11.14	8.55	9.01	6.97	8.01	8.17	8.86	9.03
ENSMMUG00000000191	0	0	0	0	0	0	0	0	0	0	0	0	0	0	0	0	0	0	0	0	0	0	0	0	0	0	0	0	0	0	0	0	0	0	0	0.09	0	0	0	0	0	0	0	0	0	0	0	0	0
ENSMMUG00000000192	32.61	33.93	29.18	32.75	34.89	37.56	34.91	32.34	30.89	31.7	46.72	38.22	36.81	42.28	47.27	40.29	30.65	26.13	30.19	31.93	33.48	39.16	51.04	38.35	25.14	25.77	27.48	24.89	28.37	26.29	29.87	27.95	23.98	25.76	29.12	27.34	26.39	26.62	27.73	28.18	33.55	37.1	44.84	45.08	39.11	49.56	50.28	50.62	28.08
ENSMMUG00000000193	32.03	33.98	41.72	35.18	27.38	33.08	25.03	31.79	37.3	23.13	32.02	30.09	29.76	25.43	29.73	31.8	28.36	24.97	24.85	30.73	22.89	25.93	24.03	27.59	30.28	34.36	39.99	38.71	33.58	38.52	33.17	30.47	35.49	32.79	35.89	30.1	34.98	30.69	26.62	39.26	30.58	31.81	40.9	31.66	36.47	31.01	40.26	34.25	30.16
ENSMMUG00000000194	1.88	2.41	1.63	1.9	2.4	1.76	2.18	2.36	2.33	1.82	1.63	2.45	3.05	3.16	2.71	2.96	2.22	2.45	2.02	2.23	2.51	2.48	3.35	2.38	2.32	2.62	1.73	2.47	2.51	2.91	2.52	2.5	14.58	16.79	12.85	15.99	15.33	15.97	12.93	14.39	6.28	6	5.43	6.36	7.73	5.45	6.19	5.72	4.35
ENSMMUG00000000195	5.95	4.74	4.05	4.51	4.39	4.25	3.16	4.99	4.29	2.89	4.2	3.87	5.62	3.86	3.27	4.29	5.71	3.46	3.42	4.61	4.78	4.18	3.95	4.1	3.51	3.64	5.03	5.9	7.14	7.01	3.93	4.99	5.95	6.59	4.46	6.64	5.58	8.85	8.18	7.01	6.23	5.9	5.58	6.62	6.67	4.95	5.93	6.55	7.09
ENSMMUG00000000196	0.05	0.07	0.03	0.05	0.03	0.08	0.14	0.06	0.03	0.03	0.04	0.04	0.07	0.02	0.03	0.07	0.02	0.04	0.1	0.09	0.07	0.08	0.08	0.21	0.09	0.12	0.11	0.13	0.09	0.11	0.12	0.05	0.49	0.72	0.44	0.83	0.53	0.65	0.74	0.93	0.35	0.36	0.4	0.45	0.61	0.5	0.83	0.51	0.25
ENSMMUG00000000197	0.21	0.13	0.13	0.21	0.2	0.14	0.17	0.18	0.24	0.16	0.04	0.22	0.18	0.16	0.19	0.11	0.16	0.14	0.13	0.2	0.09	0.13	0.07	0.05	0.16	0.2	0.15	0.28	0.15	0.16	0.11	0.08	0.23	0.37	0.27	0.62	0.27	0.47	0.35	0.51	0.41	0.37	0.34	0.62	0.47	0.46	0.46	0.43	0.52
ENSMMUG00000000198	1.44	1.3	1.45	1.2	1.22	1.06	1.1	1.18	1.98	1.38	2.36	1.34	1.86	2.86	1.68	1.96	1.03	1.13	1.64	1.19	1.16	1.85	1.58	1.58	1.48	1.26	1.61	1.27	1.36	1.65	1.22	1.52	6.4	6.59	5.55	6.05	6.61	8.77	6.38	6.6	3.09	3.08	2.95	2.9	2.89	3.99	3.36	3.3	2.5
ENSMMUG00000000199	11.95	9.96	16.19	11.32	10.62	11.97	9.68	11.91	35.11	27.43	28.27	36.48	27.01	35.6	24.91	30	32.59	23.87	21.01	27.1	22.65	30.86	33.23	34.32	25.34	20.63	17.69	15.87	17.34	20.49	18.05	25.72	0.86	0.55	1.14	1.59	1.11	1.72	1.49	1.99	40.79	35.41	38.57	53.23	39.92	51.1	38.8	48.91	34.77
ENSMMUG00000000200	0.36	0.44	0.58	0.57	0.43	0.68	0.23	0.4	2.58	0.88	1.24	0.95	2.97	1.45	0.81	1.36	0.46	0.53	0.7	0.32	0.88	0.5	0.29	0.71	0.45	0.74	7.4	4.88	4.18	1.75	3.57	1.36	2.66	1.59	2.34	1.56	0.47	0.77	0.73	1.09	0.28	0.23	0.52	0.34	0.43	0.6	0.19	0.3	0.92
ENSMMUG00000000202	0.01	0.03	0.01	0.01	0.01	0	0.03	0.03	0.01	0.03	0	0.02	0.02	0.02	0	0.01	0.02	0	0.03	0.04	0	0.03	0	0.02	0.02	0.03	0.02	0.01	0.01	0	0.05	0	0.01	0.03	0.04	0.05	0.03	0.01	0.07	0.05	0.01	0.02	0.01	0	0	0.01	0.03	0.01	0.03
ENSMMUG00000000203	2.69	2.64	2.59	3.34	4.12	3.25	3.39	3.89	1.62	2.09	1.26	2.61	2.28	1.56	2.08	2.15	1.27	1.55	2.36	1.92	2.16	1.67	1.14	1.98	2.07	2.72	1.82	2.86	2.28	2.29	3.17	2.83	3.81	4.11	3.96	4.84	4.08	3.05	3.76	3.88	2.3	2.99	3.24	3.31	3.85	2.23	3.87	3.3	2.46
ENSMMUG00000000204	0.94	1.29	1.24	1.13	0.94	0.9	0.92	0.77	0.39	0.41	0.61	0.61	0.52	0.45	0.63	0.34	0.53	0.63	0.57	0.47	0.52	0.42	0.7	0.54	1.3	1.22	1.67	1.37	0.79	1.1	1.36	1.26	2.81	4.46	3.24	3.26	3.81	3.05	2.92	3.73	1.74	1.49	2.62	1.95	2.53	2.6	2.07	2.45	1.28
ENSMMUG00000000205	1.42	1.75	2.14	1.36	1.59	1.49	1.19	1.35	1.81	1.9	1.56	1.73	1.23	1.02	1.4	1.09	1.43	1.31	1.67	1.76	1.34	1.01	1.14	0.85	2.33	1.68	2.75	1.51	1.67	1.51	1.36	1.84	6.99	7.31	11.21	11.06	6.99	6.53	7.62	6.08	12.72	16.84	12.36	12.56	10.75	14.95	11.24	11	12.83
ENSMMUG00000000207	0.01	0.02	0.06	0	0.06	0.01	0.05	0.04	0	0.05	0.09	0	0.04	0.05	0.02	0	0.05	0.02	0	0.02	0.06	0.12	0.04	0.04	0.08	0.05	0.1	0.04	0	0.12	0.03	0	1.23	0.73	0.28	0.42	0.06	0.16	0.47	0.2	0.02	0.09	0.06	0	0.01	0.03	0	0.08	0.02
ENSMMUG00000000208	1.37	1.21	0.54	0.67	0.45	0.41	0.76	1.07	0.69	0.72	0.7	0.61	0.6	0.43	0.65	0.34	0.79	0.51	0.49	0.39	0.63	0.5	0.76	0.63	0.82	0.52	0.42	0.57	0.61	0.33	0.48	0.46	106.62	95.99	110.52	101.81	80.2	57.2	89.38	60.3	65.14	65.38	48.35	39.82	33.27	45.59	33.31	36.11	23.85
ENSMMUG00000000209	0.65	0.61	0.87	1.24	0.84	1.19	0.8	1.09	0.44	0.72	0.55	0.43	0.89	0.91	0.76	0.84	0.46	0.44	0.75	0.48	0.5	1.08	0.75	0.7	0.88	1.3	1.06	0.98	1.02	1.36	0.75	1.05	3.15	4.05	2.69	3.31	3.17	4.05	3.6	3.68	0.67	1.41	1.86	1.62	1.2	1.25	1	1.51	0.85
ENSMMUG00000000210	0.02	0	0	0	0	0.09	0.02	0	0	0	0	0	0	0	0	0	0	0	0	0	0	0	0	0.1	0.06	0.06	0	0	0	0	0	0	0	0.05	0	0	0	0	0.07	0.04	0	0.04	0	0	0	0	0	0.05	0
ENSMMUG00000000212	0.01	0	0	0	0.02	0.04	0.05	0	0	0	0	0	0	0	0	0	0	0.01	0	0	0	0	0	0.04	0.03	0	0	0	0	0.02	0.03	0	0.02	0	0.02	0	0	0	0.04	0	0	0	0	0	0	0	0	0.05	0
ENSMMUG00000000213	0	0	0	0	0	0	0	0	0	0	0	0	0	0	0	0	0	0	0	0	0	0	0	0	0	0	0	0	0	0	0	0	4.55	3.86	3.74	3.49	2.23	5.98	3.47	4.52	1.75	2.25	1.18	1.17	2.61	1.61	3.28	1.98	1.3
ENSMMUG00000000214	0	0	0	0	0	0	0	0	0	0	0	0	0	0	0	0	0	0	0	0	0	0	0	0	0	0	0	0	0	0	0	0	0.37	0.11	0.42	0.29	0.16	0.14	0.16	0.46	0.09	0.15	0.03	0.3	0.13	0.03	0	0.07	0
ENSMMUG00000000215	0.32	0.29	0.12	0.12	0.09	0.09	0.12	0.14	0.29	0.28	0.14	0.21	0.16	0.15	0.17	0.22	0.12	0.23	0.08	0.14	0.13	0.14	0.12	0.12	0.24	0.11	0.06	0.17	0.16	0.1	0.16	0.14	0.57	0.62	0.42	0.51	0.5	0.28	0.7	0.71	0.66	0.47	0.21	0.44	0.53	0.21	0.38	0.47	1.06
ENSMMUG00000000216	0	0	0	0	0.01	0	0	0	0	0	0	0	0	0	0.02	0	0	0	0	0	0	0	0	0	0	0	0	0	0	0	0	0	0	0	0.02	0	0	0	0	0	0	0	0	0	0	0	0	0	0
ENSMMUG00000000217	35.8	33.61	36.51	34.71	31.17	32.64	29.62	33.46	50.33	52.41	53.38	48.81	46.54	54.96	53.51	44.27	39.08	35.7	36.33	42.46	38.95	40.25	54.7	42.45	33.87	30.42	32.57	31.64	30.16	32.1	35.74	31.87	41.15	40.72	39.64	45.03	44.78	54.48	49.57	43.94	54.04	52.04	52.36	56.12	48.17	60.32	53.71	54.56	54.3
ENSMMUG00000000218	0.07	0.1	0.1	0.08	0.1	0.21	0	0.04	0.17	0.15	0	0.03	0.17	0.19	0.05	0.13	0.02	0.03	0.05	0.02	0.08	0.06	0.12	0.08	0.13	0.09	0.11	0.24	0.13	0.06	0.14	0.07	0.08	0.16	0.28	0.32	0.13	0.15	0.14	0.17	0.14	0.03	0	0.23	0.08	0.17	0.11	0.26	0.08
ENSMMUG00000000220	11.16	13.77	13.94	13.05	9.55	9.42	9.53	9.51	10.16	9.38	10.5	10.87	9.99	7.85	11.69	9.98	8.23	10.29	8.55	11.07	8.93	7.52	10.21	7.63	9.34	10.24	10.49	10.33	9.22	8.39	9.99	9.88	20.76	22.15	18.78	21.12	16.08	16.19	19.13	17.56	17.78	25.56	23.95	20.21	19.75	19.34	21.9	18.18	19.98
ENSMMUG00000000221	0.29	0.27	0.31	0.22	0.33	0.31	0.18	0.27	0.36	0.2	0.49	0.36	0.45	0.47	0.32	0.62	0.05	0.25	0.6	0.4	0.2	0.19	0.21	0.13	0.03	0.15	0.31	0.4	0.22	0.48	0.24	0.23	0.71	0.97	0.65	0.63	0.6	0.5	0.86	0.51	0.49	0.73	0.55	0.29	0.62	0.28	0.37	0.6	0.3
ENSMMUG00000000222	0.03	0.1	0	0.01	0.01	0.01	0	0	0	0	0.08	0	0	0	0	0	0	0	0	0.03	0	0.06	0	0.02	0.06	0	0.12	0	0.02	0.11	0	0.12	0.03	0.05	0.02	0	0	0	0.1	0.07	0	0.04	0.04	0.01	0.02	0.03	0	0.05	0.02
ENSMMUG00000000223	1.34	1.38	1.57	1.35	2.17	2.51	1.51	1.96	1.15	1.89	1.49	1.77	1.84	2.12	2.32	1.89	1.7	1.2	1.42	1.97	2.07	1.8	1.84	1.67	0.9	1.34	1.13	0.79	1.3	1.13	1.26	1.1	11.4	6.24	9.91	5.94	12.46	10.98	13.6	14.13	3.19	3.94	4.37	5.45	4.61	3.23	5.21	5.06	7.58
ENSMMUG00000000224	9.33	11.01	9.34	10.47	14.13	12.6	10.46	11.13	6.44	8.43	7.41	7.84	8.29	7.64	9.15	8.3	6.03	8.22	7.85	8.12	8.87	8.01	8.54	7.56	6.19	7.48	6.75	7.34	7.16	6.83	8.61	7.23	25.61	26.49	23.83	25.47	24.9	21.25	25.17	22.83	18.88	24.36	21.24	22.55	21.73	22.7	21.51	20.62	16.03
ENSMMUG00000000225	4.69	5.63	6.6	5.69	6.89	6.87	5.33	5.68	8.45	9.92	7.92	10.96	7.14	8.72	5.84	7.36	5.84	5.08	5.88	6.32	6.57	5.38	5.18	7.41	8.68	8.37	6.48	5.78	4.91	5.71	5.36	6.1	21.75	17.14	17.68	16.91	17.37	18.05	18.35	21.11	14.49	18.34	15.43	16.56	13.21	16.21	14.28	17.88	11.64
ENSMMUG00000000226	8.19	8.51	7.23	8.87	9.9	12.49	9.36	11.29	10.15	11.45	10.57	9.14	10.13	12.72	10.9	10.48	7.25	6.93	8.33	8.12	7.2	8.82	10.96	7.87	7.16	7.95	7.09	8	8.29	10.24	10.51	7.6	23.6	23.52	20.11	21.36	20.17	23.32	18.49	18.56	19.23	18.08	17.56	15.62	14.73	19.86	15.84	17.91	15.7
ENSMMUG00000000227	0.8	1.06	3.17	1.43	1.29	1	2.94	2.78	0.8	1.12	1.97	1.43	1.76	2.04	2.78	3.12	0.82	0.59	2.1	1.35	1.38	2.07	2.83	2.72	2.12	3.05	8.07	6.74	4.29	8.35	6.91	8.82	0.55	0.9	1.26	1.16	0.95	1.41	1.14	1.52	1.13	1.18	1.97	2.65	1.7	1.89	4.47	2.79	1.03
ENSMMUG00000000229	10.84	12	11.02	10.97	9.65	10.47	8.91	10.59	10.89	9.51	11.96	11.67	13.69	13.59	11.28	12.33	7.04	8.23	9.72	10.96	9.17	10.38	13.49	9.85	9.85	8.76	10.52	11.15	11	13.38	10.76	11.05	34.33	37.45	33.54	36.7	33.18	37.67	34.63	36.22	19.73	22.22	20.5	22.44	20.63	22.67	20.9	23.14	17.41
ENSMMUG00000000232	4.92	4.39	5.09	4.68	3.03	3.75	3.07	2.86	4.62	2.34	3.2	2.7	2.6	2.84	3.48	2.6	3.23	3.7	3.19	3.66	2.31	2.18	3.75	1.91	3.98	3.89	3.96	4.15	3.01	3.81	4.08	2.43	13.39	12.41	10.25	8.96	8.69	8.64	8	6.73	4.74	4.41	4.08	3.97	3.37	3.67	5.27	3.06	5.17
ENSMMUG00000000233	0	0	0	0	0	0	0	0	0	0	0	0	0.04	0	0	0	0.16	0	0	0.02	0	0	0	0	0	0	0	0	0	0	0	0	0	0	0	0.46	0	0	0.04	0	0	0	0	0	0.03	0	0	0.06	0
ENSMMUG00000000236	1.16	2.05	1.16	1.78	1.78	2.59	1.64	2.14	1.54	1.78	1.8	1.9	1.61	1.98	2.2	1.82	1.07	0.97	1.42	1.53	2.09	1.48	2.59	1.33	0.99	1.08	1.09	1.93	1.38	1.08	0.65	1.03	1.43	1.76	1.41	1.43	0.99	2.17	1.58	1.57	1.19	1.84	1.3	1.59	1.9	2.1	1.28	1.93	1.64
ENSMMUG00000000237	2.54	2.39	4	3.74	4.8	4.69	3	3.08	2.41	1.77	2.48	2.23	2.6	1.81	2.43	2.15	1.92	1.16	1.96	2.28	2.02	1.64	2.39	1.69	2.34	2.11	2.69	2.04	2.29	2.75	2.66	2.47	10.72	10.81	12.91	10.69	14.36	12.9	11.57	13.55	5.36	4.96	4.9	5.41	5.36	5.71	4.24	4.91	4.51
ENSMMUG00000000238	3.56	3.17	3.22	2.88	4.1	3.92	2.6	3.39	3.84	4.79	1.74	3.16	2.37	2.59	2.3	2.97	3.61	3.62	3.52	2.79	2.12	2.38	1.43	2.33	3.25	3.51	2.1	1.68	1.34	1.53	2.37	1.48	18.72	13.16	21.12	15	11.58	11.56	12.25	11.34	20.55	26.76	16.78	15.44	15.24	13.75	13.37	14.33	22.43
ENSMMUG00000000240	0	0	0	0.01	0.01	0.02	0	0.02	0.01	0	0.01	0.01	0.01	0.02	0.01	0.01	0.02	0	0.01	0	0	0.01	0	0.01	0	0	0	0.01	0.01	0.01	0	0	0.01	0.01	0.05	0.02	0.03	0.07	0.03	0.05	0.03	0	0.02	0.04	0	0.06	0.01	0.05	0.03
ENSMMUG00000000241	0	0	0	0	0	0	0	0	0	0	0	0	0	0	0	0	0	0	0	0	0	0	0	0	0	0	0	0	0	0	0	0	0.34	0.33	0.27	0.29	0.34	0.23	0.1	0.4	0.53	0.36	0.26	0.44	0.38	0.35	0.39	0.15	0.17
ENSMMUG00000000242	15.67	16.3	17.48	14.92	9.39	9.97	10.88	10.07	17.92	11.55	15.78	17.41	15.39	14.59	17.53	15.08	19.29	21.76	12.74	19.38	16.56	17.43	17.9	15.88	16.65	18.19	13.91	14.32	11.25	16.97	14.48	12.61	12.91	10.96	9.2	10.37	9.43	11.1	8.47	9.24	22.42	20.1	17.83	16.33	16.33	23.13	20.62	15.16	17.32
ENSMMUG00000000243	0	0	0	0	0	0	0	0	0	0	0	0	0	0	0	0	0	0	0	0	0	0	0	0	0	0	0	0	0	0	0	0	0	0.04	0.04	0.07	0	0.01	0.03	0.04	0.02	0.03	0	0.01	0	0.02	0	0.05	0.05
ENSMMUG00000000244	0	0	0	0	0	0	0	0	0	0	0	0	0	0	0	0	0	0	0	0	0	0	0	0	0	0	0	0	0	0	0	0	0.05	0.11	0.08	0.03	0.06	0.06	0.03	0.05	0.09	0.05	0.08	0.05	0.03	0.04	0.05	0.05	0.07
ENSMMUG00000000245	0.05	0.05	0.04	0.06	0.05	0.06	0.06	0.06	0.07	0.05	0.04	0.04	0.04	0.05	0.04	0.04	0.06	0.07	0.03	0.02	0.04	0.06	0.05	0.05	0.05	0.07	0.07	0.04	0.05	0.05	0.09	0.05	0.07	0.08	0.08	0.05	0.05	0.07	0.08	0.07	0.09	0.07	0.07	0.12	0.05	0.09	0.11	0.06	0.06
ENSMMUG00000000246	3.37	3.31	6.81	3.12	2.29	3.46	4.32	4.01	15.02	13.19	14.96	14.71	10	12.63	10.45	12.56	11.1	11.33	10.39	12.63	7.67	8.53	11.41	9.81	12.09	11.45	9.02	8.31	6.64	12.02	10.01	12.7	1.62	1.57	1.8	2.13	2.08	2.85	2.37	2.74	24.65	25.61	20.74	21.33	17.33	19.96	22.85	22.41	22.86
ENSMMUG00000000247	0.82	0.8	0.78	0.96	0.56	0.66	0.99	0.51	0.52	0.56	0.81	0.93	0.72	0.67	0.82	1.16	0.58	0.72	0.68	0.61	0.74	0.69	0.63	0.64	0.56	0.43	0.71	0.78	0.73	0.83	0.61	0.66	1.3	1.59	2.57	1.46	1.26	1.51	2.08	1.51	1.19	1.35	1.34	1.33	1.29	2	1.9	1.63	1.23
ENSMMUG00000000248	0	0.01	0.01	0.01	0.01	0	0	0.02	0	0.02	0	0	0	0	0	0	0	0	0.01	0	0	0	0	0	0.01	0	0.02	0.01	0	0	0.03	0	0.03	0	0.02	0	0	0.02	0	0	0	0	0	0	0	0.02	0.01	0.01	0
ENSMMUG00000000249	6.59	6.23	5.99	6.75	5.91	5.27	5.2	6.04	5.36	4.59	6.1	5.95	6.09	6.59	5.87	5.09	5.99	5.44	5.11	5.7	6.17	5.74	6.28	6.24	4.17	4.25	6.52	7.6	7.41	8.17	6.62	6.27	8.67	10.28	8.85	12.38	10.75	9.13	11.32	11.06	8.81	7.23	7.65	10.67	9.56	7.75	6.2	9.15	10.02
ENSMMUG00000000250	5.44	4.9	4.97	5.33	2.98	2.69	3.42	2.78	6.57	2.58	4.81	6.44	7.63	7.35	6.32	5.7	11.17	6.97	5.21	8.31	9.35	10.05	8.25	9.95	7.51	7.58	9.97	8.05	8.19	10.53	7.55	7.25	12.99	14.42	11.54	13.41	16.8	13.85	11.68	14.52	12.58	7.57	12.78	12.94	15.25	12.32	12.08	11.06	8.09
ENSMMUG00000000252	10.26	11.73	13.08	13.09	11.86	12.9	9.14	12.44	7.87	8.43	10.17	9.38	9.57	10.82	11.47	11.64	6.32	5.74	7.98	9.88	8.73	8.64	11.07	8.75	7.45	7.2	8.13	10.18	9.17	10.4	9.73	9.77	15.82	21.03	16.43	17.84	15.98	19.75	17.32	16.94	10.51	11.34	11.3	11.36	10.55	13.12	11.37	11.18	12.26
ENSMMUG00000000255	0	0	0.01	0.1	0.01	0	0	0	0	0	0	0	0	0.03	0	0.06	0.03	0	0.01	0	0	0	0	0	0	0	0	0	0	0.02	0.05	0.03	0	0.02	0	0.04	0	0.04	0	0.02	0	0.01	0.03	0	0	0.04	0	0.02	0.04
ENSMMUG00000000256	0.08	0.23	0.18	0.19	0.07	0.07	0.09	0.12	0.07	0.14	0.14	0.27	0.09	0.15	0.15	0.19	0.03	0.2	0.11	0.44	0.07	0.13	0.24	0.06	0.11	0.09	0.09	0.29	0.19	0.38	0.07	0.17	0.03	0.1	0.05	0.07	0.02	0.04	0.15	0.06	0.11	0.13	0	0.11	0.13	0.06	0.05	0.09	0.13
ENSMMUG00000000258	21.02	18.32	20.32	16.49	13.82	12.29	12.18	14.25	33.24	24.61	29.27	27.17	29.22	27.9	25.05	24.03	29.9	22.3	20.3	24	22.34	20.28	24.25	21.17	20.62	19.06	20.88	18.94	22.04	31.94	18.08	20.46	29.77	31.44	27.45	29.79	32.12	37.47	30.4	29.91	34.2	28.68	25.07	29.26	29.99	27.81	26.58	26.72	40.87
ENSMMUG00000000261	0.3	0.46	0.46	0.53	0.25	0.29	0.51	0.52	0.7	0.53	1.1	0.91	0.67	0.72	0.94	1.1	0.63	0.57	0.94	0.87	0.74	0.82	1.07	0.96	0.58	0.43	0.79	0.64	0.26	0.3	0.81	0.75	0.81	0.8	0.77	1.03	0.62	0.56	0.78	0.71	0.84	0.63	1.32	0.91	0.49	0.75	1.13	1.05	0.8
ENSMMUG00000000262	0	0	0.01	0.03	0	0.01	0.05	0	0	0.04	0.01	0.04	0.05	0	0.1	0.03	0.07	0	0.01	0	0.01	0.03	0.01	0.03	0.01	0	0.03	0.01	0.02	0	0.03	0.05	0	0.05	0.03	0.06	0.06	0.05	0.02	0.09	0.11	0.06	0.03	0	0.11	0.01	0.09	0.12	0.07
ENSMMUG00000000263	11.11	8.64	9.71	10.67	7.93	7.2	6.5	7.43	10.96	6.52	11.5	10.52	11.83	11.59	11.13	9.73	9.8	7.94	7.88	10.79	11.34	9.11	10.48	9.71	9.8	9.75	11.78	11.72	12.05	13.07	11.56	11.02	54.53	58.45	35.06	46.3	46.01	50.59	39.36	41.84	23.83	20.51	22.35	25.09	24.94	22.42	23.95	20.05	19.51
ENSMMUG00000000264	32.26	27.6	32.64	30.54	24.03	23.51	21.32	24.03	30.1	21.33	31.8	26.79	26.12	28.15	28.62	26.32	23.32	19.91	24.53	26.94	21.64	22.97	21.52	24.39	22.17	25.55	32.67	25.5	24.86	34.56	25.68	24.62	33.27	38.49	33.77	30.69	28.72	29.29	28.63	34.04	25.45	25.16	26.05	26.95	29.01	24.17	27.92	24.83	28.42
ENSMMUG00000000265	0.4	0.41	0.62	0.33	0.34	0.36	0.24	0.34	0.69	0.47	0.79	0.49	0.47	0.52	0.53	0.6	0.88	0.54	0.75	0.54	0.58	0.57	0.62	0.6	0.63	0.51	0.62	0.42	0.28	0.52	0.5	0.56	0.2	0.17	0.47	0.29	0.16	0.18	0.1	0.11	1.41	1.25	1.12	1.04	0.95	1.93	0.72	0.7	1.61
ENSMMUG00000000266	0.1	0.04	0.06	0.03	0.08	0.08	0.07	0.08	0.1	0.1	0.19	0.18	0.29	0.1	0.21	0.16	0.05	0.11	0.12	0.2	0.1	0.18	0.14	0.11	0.16	0.03	0.09	0.12	0.06	0.2	0.05	0.02	0.18	0.13	0.04	0.16	0.33	0.05	0.45	0.67	0.4	0.36	0.1	0.27	0.45	0.27	0.25	0.25	0.47
ENSMMUG00000000267	0	0	0	0	0	0	0	0	0	0	0	0	0	0	0	0	0	0	0	0	0	0	0	0	0	0	0	0	0	0	0	0	35.51	31.29	32.61	41.98	38.81	42.73	37.38	38.63	12.82	12.05	13.52	16.04	15.19	12.09	14.01	14.19	9.79
ENSMMUG00000000268	15.89	13.83	14.72	14.31	13.56	12.68	13.36	15.6	16.81	16.08	17.78	18.24	19.28	22.28	19.34	17.96	12.7	10.49	14.44	17.46	14.06	14.55	18.44	14.16	13.21	10.64	11.99	15.03	15.19	16.9	12.85	13.55	15.99	15.97	16.29	20.66	15.76	22.75	21.87	19.3	21.62	19.06	18.77	22.69	16.21	18.98	20.3	21.1	20.39
ENSMMUG00000000270	0.05	0.01	0	0.02	0.06	0.03	0.02	0	0.11	0.12	0.1	0.03	0.1	0.03	0.03	0.04	0.01	0.07	0.07	0.11	0.09	0.03	0.04	0.08	0.06	0.07	0.08	0.01	0.1	0.03	0.06	0.02	0.03	0.03	0.02	0.09	0.05	0.05	0.06	0.02	0.29	0.23	0.26	0.08	0.29	0.31	0.24	0.26	0.23
ENSMMUG00000000271	0.48	0.62	0.52	0.23	0.24	0.37	0.3	0.27	0.86	0.67	0.75	0.72	0.33	0.7	1.36	0.43	0.94	0.94	0.85	0.89	0.42	0.85	0.72	0.4	0.37	0.48	0.4	0.3	0.48	0.69	0.61	0.55	0.65	0.4	0.6	0.51	0.7	0.89	1.29	0.93	1.13	0.91	0.23	0.52	0.87	0.61	0.78	0.5	0.66
ENSMMUG00000000272	0	0	0	0	0	0	0	0	0	0	0	0	0	0	0	0	0	0	0	0	0	0	0	0	0	0	0	0	0	0	0	0	0.01	0.03	0.01	0.02	0.01	0.02	0.01	0.01	0	0.01	0.02	0.01	0	0	0	0	0.02
ENSMMUG00000000273	9.21	10.52	10.55	9.81	9.22	10.13	7.79	9.15	14.58	15.65	14.13	14.69	13.12	12.68	12.21	12.28	14.82	15.07	11.22	14.09	12.09	10.58	14.75	11.36	11.32	11.61	8.86	7.63	8.3	8.63	8.93	8.25	12.15	12.48	9.97	12.17	12.09	14.83	14.33	12.27	21.67	20.39	12.27	14.79	11.71	15.79	9.86	13.7	18.52
ENSMMUG00000000274	0	0	0.02	0	0.01	0	0.01	0.02	0.01	0	0	0.03	0.04	0	0	0	0	0	0	0	0.01	0.05	0.02	0.01	0	0.01	0.02	0	0.01	0.02	0	0	0.07	0.01	0	0	0.02	0.01	0	0	0.02	0.02	0	0	0	0.01	0.07	0	0.02
ENSMMUG00000000275	8.14	7.33	7.47	7.21	8.55	9.3	8.01	8.13	6.23	6.74	9.54	8.63	9.76	11.21	10.99	8.23	5.47	4.99	7.54	7.5	7.73	9.14	12.66	7.77	5.85	5.6	5.13	6.63	7.68	7.75	7.99	5.74	18.33	19.66	17.32	21.17	21.85	25.89	25.19	22.14	11.64	10.87	12.1	14.67	12.66	14.32	14.41	13	8.2
ENSMMUG00000000276	4.72	4.1	4.28	3.93	2.56	2.42	2.47	2.78	4.78	2.57	6.23	6.16	4.8	5.88	5.12	5.52	4.01	3.29	5.18	4.53	6.02	5.88	6.04	5.57	5.19	3.78	5.12	4.23	4.15	7.03	4.88	5.46	10.44	9.12	11.33	13.19	13.33	17.91	15.72	15.6	7.86	5.88	11.74	9.44	11.28	9.5	10.35	10.87	7.16
ENSMMUG00000000277	9.16	7.85	9.28	7.96	6.45	5.94	5.58	6.74	9.98	9.1	9.76	8.95	7.98	6.93	9.44	8.77	6.28	4.37	7.7	8.7	7.29	4.5	6.66	8.25	5.7	5.39	8.45	6.84	5.76	5.4	8.92	4.97	19.3	16.99	18.64	15.34	18.86	14.27	15.92	16.86	11.86	12.86	12.56	11.23	11.87	8.97	12.87	10.29	13.53
ENSMMUG00000000278	8.49	7.63	8.73	8.39	9.23	9.34	9.1	11.15	6.31	6.53	7.21	7.11	7.26	7.57	7.24	7.24	5.28	4.99	9.75	8.45	6.77	7.1	6.53	8.18	7.16	7.44	10.66	10.95	8.29	12.58	10.34	9.97	18.36	17.53	22.57	19.51	20.19	17.66	18.78	22.3	13.51	18.97	20.65	18.61	18.29	20.91	20.94	20.44	12.14
ENSMMUG00000000281	0	0	0.01	0	0	0	0.01	0.03	0	0	0.02	0	0	0	0	0	0	0	0.01	0	0	0	0.02	0	0	0	0	0	0	0	0	0	0	0	0	0.01	0	0	0	0	0	0	0	0.01	0	0	0.04	0.01	0
ENSMMUG00000000283	0	0.01	0	0.01	0.01	0	0.02	0.03	0	0	0	0	0	0	0	0	0.01	0.02	0.04	0.01	0	0.07	0	0.08	0	0.02	0.04	0	0	0.14	0	0	0	0.05	0.15	0	0	0.02	0.02	0.08	0	0.01	0.03	0	0	0	0.02	0	0.01
ENSMMUG00000000284	5.94	5.11	5.71	5.81	4.86	5.07	4.06	5.79	4.75	4.71	6.19	6.64	6.8	6.73	5.92	6.36	4.11	5.12	4.76	6.66	5.25	6.35	5.27	7.01	4.22	4.34	5.77	5.42	4.63	6.93	4.45	6.17	7.27	8.13	7.27	10.15	8.3	11.58	8.46	11.4	8.17	9.22	10.5	11.5	10.41	11.36	10.48	13.28	8.4
ENSMMUG00000000286	0.6	0.62	0.62	0.53	0.32	0.32	0.34	0.31	0.62	0.43	0.44	0.62	0.51	0.63	0.57	0.56	0.58	0.42	0.7	0.51	0.54	0.56	0.5	0.56	0.57	0.5	0.48	0.49	0.55	0.58	0.53	0.41	0.12	0.06	0.09	0.12	0.12	0.1	0.12	0.16	0.74	0.65	0.61	0.86	0.81	0.54	0.76	0.43	0.71
ENSMMUG00000000287	2.61	2.45	3.62	3.86	4.83	5.52	3.18	4.01	1.42	1.1	1.59	1.52	1.39	1.81	1.49	1.86	1.11	0.57	1.53	1.61	1.4	1.52	1.88	1.71	1.62	1.37	2.19	2.43	2.57	3.17	2.48	2.96	3.61	3.15	3.32	3.88	3.52	4.58	4.18	4.68	3.35	3.05	3.75	4.41	3.87	4.77	4	4.13	3.9
ENSMMUG00000000288	0.13	0.17	0.19	0.25	0.05	0.15	0.14	0.11	0.16	0.02	0.18	0.11	0.21	0.17	0.23	0.52	0.25	0.12	0.04	0.25	0.21	0.2	0	0.01	0.36	0.17	0.3	0.4	0.39	0.28	0.18	0.51	0.23	0.03	0.28	0.16	0.07	0.2	0.23	0.44	0.05	0.1	0	0	0.05	5.31	0	0.09	0.02
ENSMMUG00000000289	8.38	8.37	11.85	9.34	10.06	12.1	9.06	9.86	14.14	18.18	19.48	18.43	15.71	22.04	17.57	17.61	12	11.22	12.11	15.48	12.02	15.3	20.09	15.37	10.23	9.58	9.58	9.32	10.26	12.24	11.38	9.81	3.66	4.07	3.47	3.48	3.4	4.55	4.11	3.79	14.07	15.58	11.7	16.17	10.75	18.86	12	15.53	16.98
ENSMMUG00000000290	20.02	17.26	24.9	21.83	17.6	9.36	15.52	20.54	23.75	11.18	41.72	32.8	43.44	38.14	34.18	44.88	16.21	14.14	23.28	33.99	33.05	31.09	36.05	49.64	13.18	15.07	26.37	24.03	30.77	28.94	23.61	27.74	16.78	13.77	14.7	17.02	17.63	14.29	13.19	23.6	24.59	11.19	32.76	34.23	54.67	42.52	46.51	41.93	15.04
ENSMMUG00000000291	0	0	0	0	0	0	0	0	0	0	0	0	0	0	0	0	0	0	0	0	0	0	0	0	0	0	0	0	0	0	0	0	0.43	0.51	0.45	0.35	0.41	0.6	0.48	0.31	7.88	8.87	7.21	7.65	6.44	8.19	7.18	7.31	7.25
ENSMMUG00000000292	0.93	0.55	1.34	0.88	0.47	1.47	0.66	1.14	0.58	0.43	1.81	0.58	0.76	1.71	1.52	2.63	0.49	0.36	1.48	1.55	0.97	0.96	1.33	1.96	0.17	0.2	0.59	0.58	0.28	1.45	1.04	0.51	0.06	0.1	0.04	0.02	0	0.08	0	0	0.26	0.26	0.07	0.02	0.02	0.18	0.08	0	0.7
ENSMMUG00000000293	40.24	34.72	42.17	32.71	36.8	35.59	24.79	33.47	64.58	53.86	50.43	46.11	42.66	39.16	41.32	38.08	42.49	34.35	34.65	36.35	28.12	26.81	29.36	30.06	37.42	31.67	35	27.68	33.29	31.55	32.66	30.6	29.17	28.64	33.91	28.97	28.28	26.28	25.9	24.02	102.14	118.36	85.61	76.88	66.07	73.96	66.65	70.46	104.95
ENSMMUG00000000294	2.3	2.8	2.88	2.6	2.1	1.42	2.05	2.35	2.04	1.87	2.73	2.1	2.19	1.85	1.94	2.15	2.69	3.35	3.4	2.74	3.93	2.65	3.25	3.9	1.73	2.1	3.97	3	2.34	2.89	1.88	3.44	4.71	4.37	4.04	3.83	4.21	3.64	8.08	3.77	2.01	1.76	2.46	2.02	2.4	1.81	1.78	2.23	2.81
ENSMMUG00000000295	0	0	0	0	0	0	0	0	0	0	0	0	0	0	0.03	0	0	0	0	0	0	0	0	0	0	0	0	0	0	0	0	0	0.02	0.01	0	0	0	0	0	0	0.01	0	0	0	0	0	0	0	0.02
ENSMMUG00000000296	4.13	4.45	4.85	4.35	2.83	2.87	2.54	2.31	3.01	3.67	11.79	10.46	12.85	16.15	13.45	12.52	4.87	4.18	12.03	10.12	13.37	15.47	24.42	18.59	6.03	5.98	7.71	5.98	3.58	5.66	5	4.39	4.71	6.15	7.35	6.8	7.85	8.94	7.71	7.49	18.31	26.43	47.98	46.1	42.73	47.01	43.58	49.31	4.84
ENSMMUG00000000297	5.12	5.24	6.43	6.54	5.86	5.82	7.2	9.04	3.44	3.62	4.86	3.98	4.41	4.38	6.07	5.13	3.66	3.51	5.25	4.44	4.75	4.75	5.46	5.54	4.59	5.23	7.84	7.55	6.67	6.69	6.91	10.98	2.71	2.81	3.97	3.69	3.16	3.31	3.86	4.29	2.49	2.32	3.66	3.21	3.9	3.93	5.59	4.26	3.15
ENSMMUG00000000298	0	0	0	0	0.02	0.02	0	0	0	0	0	0.01	0	0.02	0	0	0.02	0	0	0	0	0	0	0	0.01	0	0.04	0	0	0	0	0.05	0.03	0.01	0.01	0.02	0.03	0	0.01	0.01	0	0	0	0.01	0	0	0	0	0
ENSMMUG00000000299	0	0.02	0	0.02	0.03	0.07	0.02	0.04	0.02	0	0.03	0	0	0.04	0	0	0	0.18	0.04	0.02	0.14	0.1	0	0	0.09	0.02	0.09	0	0.03	0.17	0.08	0	0.37	0.48	0.13	0.32	0.11	0.28	0.4	0.14	0.02	0.14	0.05	0.11	0.15	0.14	0	0.04	0
ENSMMUG00000000300	0.29	0.34	0.21	0.3	0.14	0.2	0.31	0.43	0.28	0.19	0.39	0.41	0.53	0.35	0.46	0.67	0.22	0.2	0.46	0.69	0.38	0.27	0.41	0.29	0.2	0.15	0.24	0.32	0.3	0.18	0.33	0.4	0.49	0.47	0.41	0.66	0.18	0.27	0.38	0.29	0.31	0.39	0.33	0.36	0.45	0.29	0.4	0.4	0.69
ENSMMUG00000000302	1.18	1.15	1.39	1.19	1.85	1.33	1.21	1.27	1.82	2.49	1.24	1.17	1.34	1.23	1.62	1.27	1.55	1.03	1.38	0.95	1.06	0.91	1.01	1.07	1.3	1.15	1	1.11	1.16	0.86	1.52	1.04	1.67	1.62	1.66	1.96	1.78	1.95	1.92	1.99	1.88	2.14	1.96	1.91	1.99	2.62	2.4	1.99	3.38
ENSMMUG00000000304	1.23	1.52	1.78	1.48	1.3	1.07	1.32	1.03	1.01	0.99	1.42	1.36	1.39	1.43	1.94	1.41	1.74	1.22	1.03	1.56	0.84	1.95	2.03	1.82	1.28	1.27	1.89	1.16	1.81	1.68	1.33	1.72	47.21	48.95	46.15	42.91	38.61	35.93	35.49	41.89	24.7	30.04	36.02	29.76	29.87	33.41	31.29	33.04	26.5
ENSMMUG00000000305	0	0.01	0	0.04	0.03	0.01	0	0.04	0	0.01	0	0	0	0	0	0	0	0	0.03	0.01	0	0.02	0	0	0	0.01	0	0.02	0	0	0	0	0.05	0.06	0.05	0.01	0.03	0.03	0.08	0.02	0.02	0.02	0.09	0.01	0.05	0.03	0	0.01	0.03
ENSMMUG00000000306	25.13	26.46	33.07	26.68	22.8	23.06	21	23.28	29.25	24.51	36.77	36.69	31.89	35.26	34.38	32.59	25.02	22.97	27.91	29.5	26.87	26.14	33.02	28.31	25.66	25.56	33.6	29.38	27.68	31.81	29.55	33.19	38.07	40.04	32.89	38.62	37.52	46.31	36.35	39.3	39.83	35.86	39.15	43.32	36.12	37.57	40.91	36.8	31.64
ENSMMUG00000000307	12.62	11.96	14.52	13.11	13.32	11.8	12.11	13.03	11.28	12.44	13.52	13.23	11.55	12.7	14.86	13.67	9.28	8.85	16.84	10.76	11.6	10.42	11.23	12.56	9.49	9.4	13.04	9.99	10.19	10.7	11.63	10.17	14.08	13.34	21.48	15.35	16.39	13.6	15.36	18.9	11.84	13.49	19.23	16.55	16.99	16.49	21.23	16.86	14.68
ENSMMUG00000000308	1.79	1.24	1.49	1.51	1.49	1.55	1.18	1.32	1	0.78	1.01	0.87	0.77	0.82	1.11	1.36	0.84	0.8	0.79	1.29	0.71	0.68	1.08	0.78	1.13	1.2	1.83	1.34	1.17	1.48	1.33	0.95	5.25	5.35	5.52	6.36	3.93	5.14	4.63	5.78	2.21	2.34	2.01	1.99	2.12	2.09	2.33	2.72	2.71
ENSMMUG00000000309	0.1	0	0	0.13	0.09	0.16	0	0.02	0.06	0	0.29	0.08	0.26	0.05	0.42	0.04	0.16	0.07	0.41	0.13	0	0.29	0.24	0.58	0.03	0	0.23	0	0.07	0	0.05	0	0	0.03	0	0	0	0.08	0.04	0	0.09	0.12	0.05	0.37	0.1	0.13	0.14	0.06	0
ENSMMUG00000000310	5.46	6.06	5.95	4.55	4.42	3.61	3.92	4.4	7.87	6.3	8.59	7.92	8.22	8.54	7.77	6.73	8.26	6.34	7.59	7.46	8.36	8.4	9.33	8.32	7.63	6.61	6.24	5.97	5.94	6.32	6.26	6.58	37.46	41.97	35.82	40.38	48.01	51.6	49.47	37.54	16.56	12.09	15.38	15.81	16.36	14.79	14.69	15.27	7.95
ENSMMUG00000000311	0	0.02	0	0.01	0.07	0.07	0	0.01	0.06	0.03	0.08	0.02	0.06	0	0	0.09	0.05	0.03	0.09	0	0	0.12	0.11	0	0.09	0	0.02	0.06	0	0.13	0.12	0.14	0.02	0.03	0	0	0.02	0.04	0	0.02	0.25	0	0	0	0	0	0	0.03	0.03
ENSMMUG00000000312	16.8	17.28	22.77	18.65	19.39	19.62	15.48	17.2	22.12	24.1	23.94	22.07	17.83	18.31	20.27	17.55	14.23	14.45	13.42	15.93	11.48	12.39	14.95	11.41	14.04	14.72	13.6	14.04	13.85	14.08	15.65	14.19	35.65	37.45	34.36	32.5	31.17	30.77	31.44	31.51	42.43	48.33	40.57	35.09	33.28	36.77	38.21	35.6	35.85
ENSMMUG00000000313	0.07	0.06	0.07	0.07	0.05	0.09	0.03	0.06	0.01	0.03	0.06	0.02	0.02	0.01	0.01	0.05	0.02	0.03	0.02	0.01	0.04	0.03	0.02	0.01	0.03	0	0.06	0.08	0.02	0.06	0.05	0.01	0.26	0.12	0.09	0.22	0.16	0.06	0.1	0.11	0.03	0.03	0.02	0.04	0.05	0.02	0.05	0.07	0.05
ENSMMUG00000000314	1.47	1.6	1.53	2.3	2.67	2.82	2.01	2.29	1.97	2.73	2.17	2.21	1.91	2.49	2.21	1.69	1.39	1.54	1.52	2	1.18	1.87	2.03	1.49	1.3	1.43	1.16	1.35	1.28	1.28	1.37	1.36	3.12	2.75	2.52	2.82	2.68	3.26	3.35	2.88	5.2	6.39	5.18	4.64	4.89	6.38	4.34	5.31	4.55
ENSMMUG00000000315	2.72	2.84	3.23	3.35	2.99	3.12	2.75	3.16	2.55	2.53	3.29	2.54	3.38	3.24	2.87	3.59	1.91	2.06	2.45	2.3	2.15	2.25	3.34	2.62	2.06	2.1	2.83	2.3	2.73	2.91	2.78	2.11	4.42	4.45	5.25	5.09	5.75	5.74	5.49	5.64	3.48	3.11	4.14	3.33	3.98	4.64	3.49	4.06	3.07
ENSMMUG00000000316	9.78	8.21	7.87	7.74	4.73	3.77	4.73	5.95	3.06	1.71	4.08	1.97	3.39	3.27	4.22	4.43	2.63	1.92	4.43	2.9	3.75	3.25	3.35	4.18	4.66	4.04	6.71	6.36	6.83	6.76	6.59	9.05	1.64	1.31	1.66	1.42	1.4	1.76	2.15	2.04	3.01	1.79	3.81	2.84	2.04	2.15	3.11	2.35	3.01
ENSMMUG00000000317	0	0	0	0	0	0	0	0	0	0	0	0	0	0	0	0	0	0	0	0	0	0	0	0	0	0	0	0	0	0	0	0	0	0	0	0	0	0	0.06	0	0	0	0	0.04	0	0	0	0	0
ENSMMUG00000000318	3.53	4.25	4.72	3.9	3.97	3.9	5.87	5.24	3.95	4.48	5.48	5.01	6.8	6.28	6.82	6.82	3.95	4.63	6.23	4.81	6.35	6.1	7.57	6.25	5.03	5.98	7.69	7.11	7.9	8.78	8.61	8.68	3.75	4.12	3.86	4.37	5.21	4.58	5.6	4.97	4.66	4.36	5.22	5.6	6.81	4.39	6.68	7.09	4.33
ENSMMUG00000000319	1.41	1.4	1.32	1.47	1.29	1.57	1.11	1.17	1.64	1.4	1.82	1.79	1.61	2.12	1.25	1.89	1.56	1.28	1.35	1.66	1.36	1.7	1.87	1.31	1.41	1.29	1.09	1.27	1.21	1.46	1.19	0.92	1.8	2.02	1.61	1.98	1.83	2.56	2.39	1.86	2.56	1.91	2.21	2.29	2	2.16	1.87	2.28	2.03
ENSMMUG00000000320	1.17	1.1	1.28	1.58	1.77	1.1	1.48	1.8	1.22	0.66	1.62	1.8	2.57	1.95	2.4	3.01	0.64	1.11	1.14	1.59	1.55	2.12	1.42	1.69	0.68	0.43	1.23	1.86	1.86	1.95	1.9	1.81	1.06	0.91	1.09	1.76	1.84	1.61	2.38	2.01	1.45	1.3	0.79	1.49	1.86	0.94	1.78	2.13	1.08
ENSMMUG00000000321	29.16	31.84	34.06	29.95	25.83	27.04	22.73	26.5	26.02	23.17	27.28	26.27	24.08	22.7	24.82	23.57	28.23	29.44	24.71	25.91	28.78	22.47	29.22	27.84	23.4	28.45	29.17	28.53	34.28	25.43	30.66	32.06	44.9	43.87	40.31	46.65	46.75	49.69	50.88	50.75	32.99	34.75	33.75	34.55	32.49	32.1	32.44	35.96	37.92
ENSMMUG00000000322	29.36	28.17	30.05	25.93	20.4	19.13	21.57	23.04	36.39	28.94	42.47	36.24	34.9	40.3	40.43	36.96	29.57	27.21	26.21	31.23	31.08	27.66	36.85	28.93	25.79	20.79	27.03	26.21	28.65	36.08	28.21	33.3	29.95	30.66	31.07	34.65	33.62	41.57	36.61	37.12	36.11	30.62	31.55	33.15	32.82	31.46	34.89	30.53	37.12
ENSMMUG00000000323	1.45	1.42	1.69	1.85	1.9	1.65	1.96	1.62	1.51	1.3	1.83	1.79	1.27	1.57	1.68	1.93	1.42	1.19	1.68	1.74	1.76	1.52	1.89	1.06	1.6	1.48	2.17	1.65	2	2.49	2.22	2.09	2.48	3.32	3.36	3.67	5.5	5.18	5.57	5.21	1.66	1.03	1.6	1.47	1.35	1.28	2	1.27	1.62
ENSMMUG00000000324	0.05	0.15	0.19	0	0	0.14	0.11	0	0	0.09	0.04	0	0.15	0.05	0.1	0.14	0.07	0.18	0.23	0.04	0	0.1	0	0.1	0	0.15	0.04	0	0	0.09	0	0	0.08	0.11	0.03	0	0	0.03	0	0	0	0.09	0.24	0.33	0	0	0.32	0.06	0.09
ENSMMUG00000000326	0.5	0.53	0.73	0.34	0.3	0.16	0.36	0.39	0.92	0.75	1	0.77	0.66	0.53	0.67	0.69	0.9	0.98	0.65	0.8	0.94	0.79	0.99	0.74	0.8	0.85	0.5	0.44	0.47	0.72	0.55	0.66	0.44	0.72	0.4	0.54	0.43	0.33	0.37	0.37	1.09	0.78	0.78	0.51	0.43	0.68	0.88	0.77	0.8
ENSMMUG00000000327	53.92	58.8	40.05	42.32	35.26	36.1	36.75	38.47	44.87	31.02	38.82	41.6	44.31	46.09	48.45	41.62	43.9	40.39	28.26	39.85	49	44.15	50.79	35.77	41.79	40.89	40	50.96	63.25	69.32	52.57	48.63	26.59	20.53	17.17	22.94	22.12	27.33	21.51	20.29	48.2	35.47	26.18	29.28	34.18	32.31	32.43	28.1	46.65
ENSMMUG00000000328	8.14	7.13	7.49	7.85	6.37	7.41	5.86	7.21	8.4	9.78	9.86	8.6	9.43	8.97	8.35	10.09	6.48	5.6	7.19	7.93	7.18	5.82	7.68	6.68	5.19	5.73	5.7	6.23	6.2	6.55	6.36	6.83	1.94	1.93	1.7	2.08	2.63	2.3	2.41	2.64	8.7	8.56	6.44	6.91	6.11	7.18	5.91	6.44	10.7
ENSMMUG00000000329	98.49	103.47	108.84	94.77	86.62	82.84	77.93	87.01	109.96	104.1	156.01	129.49	150.45	160.62	164.06	135.9	105.17	98.54	104.29	122.78	138.77	126.8	176.07	125.4	89.1	91.12	100.53	84.25	100.33	110.64	100.19	87.22	63.32	69.35	63.62	71.33	78.63	94.9	79.99	69.83	130.53	120.56	111.35	119.43	123.23	121.45	130.04	114.21	118.56
ENSMMUG00000000330	14.91	15.02	14.98	14.86	15.64	14.02	16.5	16.56	16.39	16.64	11.56	14.11	8.93	10.24	8.55	9.59	16.2	14.55	14.06	12.2	9.68	9.59	9.2	9.3	19.69	18.75	12.71	18.05	17.2	12.56	16.12	16.51	14.45	12.77	13.95	12.03	10.81	10.65	10.56	11.48	18.47	19.78	16.87	16.18	15.66	16.78	16.87	15.92	19.78
ENSMMUG00000000331	49.5	44.05	50.58	45.41	39.16	36.08	34.09	39.63	43.09	39.05	47.77	48.11	48.67	42.42	51.69	47.72	47.21	35.49	40.77	46.45	42.66	42.11	37.72	39.17	37.36	38.96	47.24	35.85	36.02	27.27	35.56	35.58	34.48	36.43	32.43	32.44	33.18	28.06	24.03	34.33	35.9	45.63	46.27	43.74	44.16	36.47	45.65	40.2	39.95
ENSMMUG00000000332	0.5	0.53	0.5	0.61	0.22	0.29	0.21	0.26	1.04	0.95	1.28	0.83	0.99	1.09	0.82	1.2	0.49	0.48	0.86	1.29	0.84	1.5	0.64	0.3	0.79	1.65	1.28	0.88	0.95	1.52	0.62	0.95	0.88	1.11	0.83	1.04	1.08	1.06	1.14	0.92	0.53	0.43	0.6	0.43	0.58	0.84	0.31	0.81	0.85
ENSMMUG00000000333	0.05	0	0.04	0	0	0.07	0	0	0.1	0	0	0	0	0.05	0	0	0	0	0.05	0.02	0	0.1	0.02	0	0.03	0	0	0	0.04	0	0	0.05	0.08	0	0.09	0.1	0	0	0	0.04	0.02	0	0	0.06	0	0.03	0.23	0	0
ENSMMUG00000000335	0.75	0.75	1.37	0.74	0.55	0.59	0.8	1.25	1.33	0.82	1.62	1.29	0.95	1.17	1.1	1.72	1.37	1.11	2.01	1.36	1.05	1.02	1.1	1.06	1.08	1.22	1.41	0.77	0.72	0.86	1.12	1.6	1.64	1.71	1.77	1.5	1.51	1.02	1.32	2.61	1.62	1.42	1.95	1.23	1.9	1.47	1.68	2.79	2.12
ENSMMUG00000000336	1.38	1.26	1.75	1.65	1.01	1.25	1.45	1.58	1.42	0.97	1.62	1.48	1.4	1.54	1.52	1.6	0.89	1.08	0.71	1.25	1.38	1.11	1.64	1.19	1.57	1.04	1.53	0.97	0.92	0.93	1.51	0.85	12.97	14.09	12.23	13.65	14.19	13.53	14.06	12.53	7.32	8	9.43	7.25	7.87	8.39	7.63	8.66	5.51
ENSMMUG00000000337	0	0	0	0	0	0	0	0	0	0.01	0.01	0	0	0	0	0.01	0	0	0.01	0	0	0.01	0	0	0	0	0	0	0	0	0	0	0.04	0.03	0.02	0.01	0.02	0.01	0.01	0	0.01	0.01	0	0	0.01	0.01	0.01	0.01	0
ENSMMUG00000000338	4.67	4.28	6.18	3.71	2.64	3.1	3.76	4.56	4.95	4.02	4.68	3.68	3.17	3.46	3.65	4.11	4.89	4.75	8.16	4.42	3.86	4.67	3.29	4.05	5.29	5.85	6.35	3.84	3.41	5.16	4.9	6.12	4.29	4.47	5.31	3.77	3.87	2.91	3.34	4.61	5.16	5.24	6.1	4.04	4.47	4.33	4.3	3.97	6.76
ENSMMUG00000000340	1.3	1.48	1.55	1.34	1.38	1.5	0.98	1.3	1.38	1.11	1.54	1.51	1.43	1.24	1.43	1.45	1.08	0.84	1.14	1.15	1.01	1.3	1.08	1.27	0.97	1.55	1.63	1.38	1.22	1.42	1.3	1.49	6.84	7.32	7.32	7.24	7.04	6.29	6.82	6.83	4.99	5.66	4.81	4.51	4.56	6.06	5.29	4.74	3.83
ENSMMUG00000000341	0	0	0.47	0	0	0.06	0	0.15	0.47	1.31	0.98	0.84	0.72	1.18	0.63	0.25	1.68	0.06	0.08	0.17	0.67	0.37	0.6	0.91	1.49	0.61	0.17	0.04	0.06	0.11	0.17	0.2	4.21	4.24	2.02	2.74	3.37	3.14	3.25	3.01	0.85	1.58	0.36	2.32	0.26	0.92	1.52	0.92	1.64
ENSMMUG00000000342	0.03	0.08	0.05	0.02	0.03	0.05	0.02	0.05	0.09	0.09	0.06	0.05	0.08	0.09	0.04	0.05	0.04	0.04	0.06	0.06	0.02	0.09	0.03	0.16	0.05	0.06	0.05	0.02	0.07	0.04	0.04	0.01	0.42	0.82	0.33	0.35	0.37	0.3	0.31	0.35	0.51	0.6	0.32	0.39	0.37	0.25	0.4	0.37	1.01
ENSMMUG00000000343	7.53	8.39	7.56	8.68	9.8	11.82	6.49	10.14	7.18	9.39	6.77	5.54	4.46	4.48	4.32	5.19	2.79	2.39	3.13	3.78	2.12	1.62	1.8	0.94	3.85	4.22	7	7.12	8.37	5.78	7.59	4.81	1.53	1.13	0.87	0.79	0.33	0.9	0.46	0.48	16.88	13.73	9.11	7.55	4.34	6.77	6.3	5.48	22.99
ENSMMUG00000000344	0.02	0.1	0.05	0.12	0.09	0.07	0.18	0.04	0.06	0.05	0.05	0.08	0	0.03	0.06	0.07	0.06	0.02	0.1	0.01	0.07	0.05	0.03	0.01	0.13	0.09	0.12	0.08	0.04	0.03	0.05	0.03	0.19	0.21	0.49	0.27	0.14	0.04	0.11	0.18	0	0.03	0.06	0.07	0.1	0	0.13	0.06	0.05
ENSMMUG00000000345	2.42	1.9	1.81	1.76	1.44	1.73	1.56	1.81	2.33	2.04	1.69	2.18	1.92	1.91	2.25	1.94	2.54	1.53	2.18	2.43	2.09	1.78	2.46	2.03	2.8	2.17	2.45	2.36	1.96	2.47	2.2	1.78	6.04	6.63	6.64	5.49	5.12	4.65	4.43	6.65	2.24	2.15	3.27	2.36	2.58	1.95	2.84	2.38	2.84
ENSMMUG00000000346	0	0	0	0	0	0	0	0	0	0	0	0	0	0	0.06	0	0	0	0	0	0	0	0	0	0	0	0	0	0	0	0	0	0	0	0	0	0	0	0	0.03	0	0	0	0	0.01	0	0	0	0
ENSMMUG00000000347	0	0	0	0	0.03	0.03	0	0.03	0.07	0.03	0	0	0.04	0	0	0.04	0.04	0	0	0	0.01	0.04	0.09	0.01	0.02	0	0	0.07	0.04	0.07	0.05	0	0.02	0.03	0.07	0.09	0.02	0	0.11	0.06	0	0	0.05	0	0.03	0.03	0.02	0	0
ENSMMUG00000000348	2.63	2.74	2.57	2.63	1.96	2.42	1.98	2.08	2.41	2.63	2.87	2.62	2.15	2.52	1.85	2.21	2.39	2.8	2.4	2.74	2.38	2.61	2.28	2.52	3.08	2.85	2.43	2.28	1.69	2.14	2.27	1.89	7.81	8.25	6.94	6.94	5.23	6.22	5.94	7.25	4.94	4.76	5.4	4.84	3.69	4.98	3.6	4.5	4.85
ENSMMUG00000000350	0	0	0	0	0	0	0	0	0	0	0	0	0	0	0	0	0	0	0	0	0	0	0	0	0	0	0	0	0	0	0	0	22.55	27.08	23	22.89	21.82	20.58	20.55	24.55	14.08	20.31	17.61	18.79	17.33	17.95	19.51	18.54	13.83
ENSMMUG00000000352	0.01	0.01	0.01	0	0.01	0.01	0.03	0.03	0.02	0.03	0.02	0	0	0.09	0.04	0.07	0	0	0.02	0.01	0.01	0.06	0.01	0.05	0.01	0.04	0.04	0.02	0	0.04	0.03	0.04	0.04	0.14	0.05	0.03	0.04	0.01	0.07	0.04	0.01	0.01	0.03	0.03	0.02	0.02	0.15	0.07	0.01
ENSMMUG00000000353	0.15	0	0	0.07	0.03	0.57	0.03	0.25	0	0.18	0.13	0.24	0.23	0.08	0.2	0.05	0.21	0.62	0.49	0.55	0.27	0.11	0.07	0.12	0.23	0.09	0.06	0	0.11	0	0	0	0.24	0.12	0.51	0.64	0.11	0.56	0.18	0.17	0.07	0.14	0.42	0.17	0.12	0.02	0	0.34	0.18
ENSMMUG00000000355	0.01	0.01	0.02	0	0.02	0.02	0	0	0	0	0.02	0	0.02	0.02	0	0	0.01	0	0.01	0	0	0	0	0	0	0	0.02	0	0	0.04	0	0	0.04	0.01	0	0	0.04	0	0.03	0.05	0	0	0	0.05	0	0.02	0	0	0
ENSMMUG00000000356	0	0	0	0	0.04	0	0	0	0	0	0	0	0	0	0.06	0	0	0	0	0	0	0	0	0	0	0	0	0	0	0	0	0	0	0	0	0	0.04	0	0	0	0	0	0	0	0	0	0	0	0
ENSMMUG00000000357	2.94	3.09	2.71	2.64	2.35	2.8	1.8	1.91	2.16	1.59	2.11	1.61	1.57	1.8	2.28	1.76	2.21	1.54	1.83	1.86	1.6	2.56	2.21	1.66	1.92	1.94	2.55	2.27	2.43	3.13	2.13	2.08	4.01	4.08	3.41	4.48	5.71	6.83	4.96	5.68	3.27	2.99	2.97	3.15	3.71	4.17	3.82	2.88	3.07
ENSMMUG00000000358	1.89	1.89	2.61	2.16	2.04	2.06	1.7	2.25	3.51	2.88	4.84	4.89	4.55	5.17	5.51	5.66	2.48	2.15	2.97	4.17	2.85	3.69	4.55	3.43	2.58	2.85	2.64	2.61	2.65	3.34	3.18	3.38	4.13	5	5.64	6.03	5.98	8.39	7.86	7.7	5.63	5.63	6.55	6.72	5.64	6.81	7.23	7.82	5.17
ENSMMUG00000000359	0.59	0.7	1.14	0.79	1.01	0.66	1.2	1.62	0.32	0.86	0.86	0.67	0.8	0.69	1.07	0.9	0.4	0.38	1.38	1.11	1.06	0.55	1.18	0.96	0.58	0.66	1.11	0.85	0.88	0.74	1.36	1.17	1.7	1.72	3.21	1.77	1.74	1.1	1.95	2.04	0.23	0.27	0.52	0.26	0.71	0.26	0.53	0.73	0.33
ENSMMUG00000000360	0.43	0.39	0.39	0.39	0.48	0.34	0.26	0.47	0.3	0.31	0.42	0.51	0.6	0.49	0.67	0.3	0.35	0.24	0.51	0.57	0.29	0.42	0.76	0.54	0.42	0.26	0.33	0.44	0.42	0.25	0.41	0.49	0.44	0.43	0.35	0.66	0.36	0.47	0.92	0.42	0.41	0.38	0.52	0.58	0.42	0.41	0.4	0.23	0.44
ENSMMUG00000000361	1.71	2.78	2.08	2.86	3.34	3.96	2.22	2.43	1.15	1.76	1.43	2.09	1.34	0.97	1.05	1.44	1.18	1.44	1.08	2.4	0.87	1.01	0.56	1.07	1.13	1.88	0.85	1.59	1.07	1.44	1.51	1.35	1.13	1.88	0.51	1.47	0.81	0.52	0.74	0.57	1.69	2.7	1.41	1.95	1.61	1.34	1.75	1.2	1.65
ENSMMUG00000000362	1.53	1.67	1.41	1.54	1.71	1.65	1.16	1.72	1.08	1.24	1.07	1.34	1.32	1.24	1.22	1.29	0.9	0.8	1.36	1.31	1.42	1.09	1.03	1.43	1.44	1.61	1.49	1.79	1.26	2.02	1.6	1.58	2.92	2.4	2.58	2.98	2.59	2.38	2.9	3.51	1.53	1.85	1.8	2.16	1.54	1.87	2.32	2.06	1.65
ENSMMUG00000000364	38.66	34.61	40.46	32.01	23.64	25.13	21.08	25.36	40.22	27.42	39.23	35.18	45.06	40.73	47.08	36.56	27.15	23.19	30.38	33.54	34.78	33.83	42.41	32.15	24.44	22.68	39.78	29.22	35.53	43.33	28.76	33.37	34.26	32.99	27.92	33.14	38.94	41.84	38.27	35.46	32.88	29.52	33.65	37.62	44.55	39.03	41.22	32.25	39.22
ENSMMUG00000000366	2.53	2.51	3.03	2	2.13	2.27	1.68	2.05	2.94	2.32	2.56	2.14	2.07	1.99	1.89	2	2.24	1.8	2.31	2.24	2.02	2.19	1.99	1.89	2.62	2.93	2.92	2.38	2.08	2.45	2.27	2.16	3.78	3.57	3.33	3.28	4.03	2.72	2.91	3.44	2.82	2.64	3.37	2.63	2.32	3.02	2.11	2.36	2.95
ENSMMUG00000000368	4.3	5.36	2.67	5.15	5.31	6.86	5.63	6.03	0.29	0.14	0.64	0.57	0.51	0.39	0.36	0.68	0	0.11	0.34	0.37	0.19	0.38	0.13	0.29	0.17	0.59	0.8	2.46	1.98	1.33	1.71	1.51	1.29	1.98	1.62	1.86	2.38	1.65	1.6	1.5	0.51	0.78	0.89	0.98	1.21	0.71	0.78	2.28	1.3
ENSMMUG00000000369	2.09	1.89	2.75	2.9	3	2.48	1.83	2.02	2.96	2.33	2.7	2.44	2.14	2.51	2.23	2.03	1.27	1.3	1.25	1.65	1	1.26	0.84	0.66	1.09	1.14	0.9	1.13	1.34	1.57	1.4	1.34	9.93	12.38	11.39	12	14.94	18.87	17.77	18.63	7.02	6.44	7.33	7.09	6.28	9.51	6.03	7.08	7.16
ENSMMUG00000000371	0.02	0	0	0	0	0	0	0	0	0	0	0	0	0	0	0	0	0	0	0	0.01	0	0	0.01	0	0	0.03	0	0.01	0	0	0.03	0	0.01	0	0.01	0	0	0.06	0	0	0	0	0	0	0.02	0	0	0
ENSMMUG00000000372	0	0	0.02	0	0	0	0.02	0	0	0	0	0.02	0	0	0.07	0	0	0	0	0	0	0.06	0	0	0	0	0.02	0	0	0	0	0	0	0	0.03	0	0	0.02	0	0	0.03	0	0	0	0	0	0	0	0
ENSMMUG00000000373	14.84	13.46	15.02	14.32	11.73	11.57	12.71	11.16	23.55	16.36	22.28	21.87	21.12	21.28	21.09	18.93	22.81	21.11	20.3	23.19	23.68	24.78	29.44	20.46	19.34	18.36	16.92	18.42	18.58	20.81	18.74	15.23	21.85	20.54	21.11	24.86	22.26	21.3	24.71	18.6	27.3	20.12	22.17	22.07	23.5	23.64	20.37	19.91	25.01
ENSMMUG00000000375	0	0	0	0	0	0	0	0	0	0	0	0	0	0	0	0	0	0	0	0	0	0	0	0	0	0	0	0	0	0	0	0	0.14	0.04	0.03	0.04	0.01	0.03	0.06	0.08	0.03	0.02	0.02	0.01	0.01	0.04	0.05	0.04	0
ENSMMUG00000000376	86.09	78.39	119.9	86.9	78.52	72.43	94.3	90.21	75.47	65.84	94.04	75.26	85.08	93.52	84.85	76.24	59.74	45.53	77.92	66.81	73	71.23	97.6	75.55	109.67	91.43	168.23	125.87	131.74	186.25	130.87	178.65	69.38	72.89	75.47	74.31	81.53	105.62	78.38	90.09	68.59	57.48	87.43	98.14	79.2	85.93	102.35	88.31	76.3
ENSMMUG00000000377	0	0	0	0	0	0	0	0	0	0	0	0	0	0	0	0	0	0	0	0	0	0	0	0	0	0	0	0	0	0	0	0	7.54	7.26	7.77	6.76	7.72	7.82	7.3	7.57	6.83	5.61	6.52	5.12	6.84	9.09	5.68	6.24	10.4
ENSMMUG00000000378	0.18	0.34	0.57	0.31	0.23	0.31	0.57	0.53	0.15	0.22	0.36	0.33	0.24	0.34	0.28	0.37	0.24	0.28	0.4	0.3	0.24	0.6	0.49	0.5	0.87	0.78	1.4	1.22	0.73	1.81	0.98	1.32	0.95	0.98	1.14	1.17	1.23	1.31	1.3	1.41	1.45	1.68	1.92	2.28	2.02	2.52	3.25	2.78	0.94
ENSMMUG00000000379	21.97	18.14	26.83	23.46	31.22	27.37	25.79	27.64	21.47	25.11	30.31	24.52	30.67	28.15	29.71	32.31	22.2	25.21	31.37	25.42	30.01	33.92	33.83	31.33	17.42	21.04	28.13	22.44	23.16	20.11	23.64	21.03	4.16	6.69	11.82	8.35	8.03	7.85	10.11	10.01	23.09	25.93	30.94	23.15	31.17	28.32	34.28	34.8	22.03
ENSMMUG00000000380	24.58	23.33	23.82	22.24	22.2	21.57	18.47	22.09	22.14	20.25	23.45	20.45	21.18	20.46	22.46	21.08	15.09	13.6	18.05	18.92	17.03	16.61	18.48	18.51	18.38	18.47	18.77	14.46	15.51	17.22	19.5	16.09	19.18	20.03	19.99	19.03	19.26	18.35	17.48	19.55	18.58	20.91	23.75	21.06	20.11	19.76	22.85	20.57	21.61
ENSMMUG00000000381	0.11	0.13	0.26	0.03	0.07	0.15	0.09	0.14	0.09	0.06	0.08	0.12	0.06	0.11	0.07	0.09	0.08	0.15	0.07	0.09	0.07	0.08	0.07	0.17	0.19	0.23	0.19	0.22	0.1	0.2	0.11	0.15	2.93	3.44	3.79	3.45	2.55	2.73	3.22	2.75	2.11	2.97	2.38	2.49	2.06	2.64	2.95	2.12	1.69
ENSMMUG00000000382	5.54	5.49	7.73	5.61	6.88	5.79	6.15	7.24	3.4	4.09	4.49	4.03	5.26	4.59	4.94	4.66	3	2.96	4.88	4.07	5.08	4	4.04	3.66	4.34	4.11	7.73	4.99	5.9	5.93	6.1	7.33	6.7	5.67	7.7	4.8	11.67	8.26	10.08	9.56	15.03	16.7	20.24	18.72	23.09	16.88	24.59	20.09	12.12
ENSMMUG00000000383	1.81	1.86	1.88	1.74	2.2	1.98	1.87	1.77	1.76	2.42	1.96	2.04	1.92	1.89	1.94	2.03	1.75	1.65	1.88	2.02	1.77	1.71	1.85	2.03	1.65	1.73	1.47	1.42	1.25	1.1	1.83	1.31	19.48	21.26	16.68	19.23	16.89	14.72	14.31	15.95	10.87	11.78	12.14	12.72	9.58	12.33	11.47	11.48	7.25
ENSMMUG00000000384	0	0.14	0.81	0.1	0	0	0.09	0.16	0.33	0.31	0.36	0.23	0.46	0.1	0.28	0.2	0.44	0	0.48	0.24	0.1	0.02	0.08	0.05	0.23	0.32	0.4	0.08	0.13	0	0.18	0.13	0.09	0	0	0	0	0.14	0	0	0.3	0.49	1.21	0.46	0.34	0.45	0.48	0.39	0.28
ENSMMUG00000000386	7.73	8.82	10.71	9.74	8.9	10.34	10.46	11.97	7.78	8.48	6.65	8.41	5.24	7.26	6.23	6.24	8.01	7.18	9.07	8.22	6.18	6.42	5.28	8.41	8.96	10.04	13.37	11.06	9.14	11.26	9.76	12.63	19.29	19.96	23	20.23	19.88	18.63	19.49	22.07	9.28	11.88	11.43	12.22	9.7	9.7	12.77	11.23	10.3
ENSMMUG00000000387	2.78	2.56	2.85	2.63	3.11	2.96	3.73	3.24	0.99	0.97	1.07	1.12	1.22	1.13	1.15	1.28	0.86	0.97	1.59	0.97	1.62	1.52	1.19	1.97	2.79	2.98	4.32	3.74	3.19	4.21	3.7	4.33	2.01	1.65	1.8	1.99	2.35	2.04	2.4	2.67	3.18	3.5	4.38	5.35	4.6	4.96	6.29	5.44	2.3
ENSMMUG00000000388	13.06	14.08	10.73	14.32	19.25	20	18.37	18.1	14.32	17.24	20.14	18.43	21.22	24.39	25.74	23.05	12.74	11.37	20.07	15.45	16.66	21.47	25.03	18.5	11.08	11.43	11.29	9.73	12.01	16.63	18.37	11.04	10.63	14.1	14.8	16.06	16.36	22.73	20.01	19.12	18.35	16.55	16.97	18.77	19.08	24.63	22.67	23.44	15.74
ENSMMUG00000000389	0	0	0	0	0	0	0	0	0	0	0	0	0	0	0	0	0	0	0	0	0	0	0	0	0	0	0	0	0	0	0	0	6.73	5.56	4.72	5.99	8.7	8.3	8.19	7.55	6.43	5.43	4.76	5.34	5.32	5.09	5.68	5.6	6.22
ENSMMUG00000000390	12.69	11.73	12.6	11.38	11.27	12.31	10.1	10.58	11.29	9.22	10.38	10.38	9.36	10.46	10.53	9.57	9.1	6.66	8.6	10.06	7.69	8.94	9.55	7.13	9.59	8.31	9.99	9.94	8.42	10.34	10.04	8.91	21.74	19.98	16.43	20.7	20.66	22.02	18.59	19.13	17.15	17.46	18.65	20.38	19.63	17.46	20.73	15.92	16.97
ENSMMUG00000000391	6.12	5.63	7.47	5.99	5.54	6.65	4.92	6.01	7.89	5.86	8.74	9.62	8.6	11.41	9.83	10.21	6.66	5.39	7.43	7.45	6.77	8.68	9.4	8.67	6.59	6.48	6.39	6.98	6.33	8.46	6.77	6.81	13.57	16.1	14.13	16.87	14.58	22.61	16.86	17.97	10.29	9.53	11.39	12.09	11.34	11.69	11.58	13.24	8.88
ENSMMUG00000000392	0	0	0	0	0	0	0	0	0	0	0	0	0	0	0	0	0	0	0	0	0	0	0	0	0	0	0	0	0	0	0	0	0.09	0.02	0.02	0.14	0.04	0	0	0.04	0	0	0	0.01	0	0.17	0	0	0.04
ENSMMUG00000000396	8.55	6.93	7.07	5.25	7.06	4.53	3.91	5.4	5.98	4.88	5.64	4.73	6.72	4.33	4.62	4.99	5.86	3.51	4.32	4.71	5.45	4.07	4.14	3.36	6.15	5.44	6.04	4.49	7.03	4.91	4.63	5.09	35.71	32.13	27.92	33.61	36.32	34.92	30.67	37.17	20.54	20.52	19.47	20.32	22.37	18.85	18.91	20.49	17.27
ENSMMUG00000000397	3.82	2.71	4.45	4.45	3.15	4.05	3.96	2.89	3.57	2.65	5.33	5.09	2.96	3.91	3.64	2.56	3.24	1.95	3.56	4.53	3.5	3.64	3.08	2.61	4.16	2.96	4.43	4.22	3.45	6.11	3.81	2.54	8.18	9.06	8.01	11.21	8.35	10.67	8.43	8.84	7	7.18	6.35	8.02	6.42	6.07	7.34	5.21	5.29
ENSMMUG00000000398	5.27	4.38	7.32	4.32	3.29	3.49	3.76	3.9	21.88	13.86	21.75	24.01	20.73	20.54	15.56	16.63	21.96	20.59	18.53	22.75	21.59	20.13	21.44	18.44	12.77	10.51	6.42	6.92	8.3	8.67	6.5	6.17	9.32	10.4	7.73	11.54	10.62	10.93	12.74	7.06	22.78	15.59	13.4	15.96	19.69	15.63	12.7	15.42	25.72
ENSMMUG00000000399	18.57	19.64	21.12	17.71	17.64	17.73	16.48	20.07	18.44	17.14	14.86	14.75	13.08	11.87	13.49	13.97	14.34	11.91	13.28	13.13	11.64	12.11	12.24	12.57	17.97	17.34	19.42	19.17	20.03	16.74	20.67	20.7	13.78	12.62	16.13	14.81	12.87	12.87	13.37	14.09	17.5	18.41	17.71	17.57	15.56	14.76	17.67	16.9	21.67
ENSMMUG00000000400	7.55	8.56	9.78	8.41	7.13	7.66	7.29	7.71	5.59	5.23	6.39	6.66	6.1	5.95	6.05	5.05	7.13	6.18	7.17	6.41	7.97	5.67	6.93	5.71	5.97	6.39	6.91	5.9	6.47	5.12	6.44	6.28	6.71	6.43	6.18	6.11	7.89	5.7	6.2	5.91	7.15	8.18	9.08	8.5	8.95	7.38	7.18	7.93	7.46
ENSMMUG00000000401	5.4	5.14	5.12	5.3	6.27	5.74	5.17	4.87	9.42	10.16	10.26	10	11.45	9.82	10.92	9.2	7.23	7.13	6.51	8.12	8.88	7.46	9.76	8.24	5.9	6.76	5.91	4.89	6.76	6.46	6.69	5.88	6.81	7.73	5.24	8.29	8.13	10.48	9.3	8.46	13.68	13.13	12.02	12.65	15.17	13.46	14.69	13.48	11.01
ENSMMUG00000000402	0.94	1.03	1.01	0.85	0.79	0.84	0.82	0.88	0.51	0.38	0.58	0.42	0.78	0.58	0.91	0.6	0.18	0.24	0.59	0.57	0.46	0.53	0.49	0.67	0.62	0.82	0.67	0.79	0.71	0.69	0.99	0.49	5.17	6.37	3.49	3.85	3.86	3.99	4.25	3.77	1.72	2.18	2.14	2.47	2.06	2.08	1.93	2.2	1.06
ENSMMUG00000000404	0.1	0.13	0.18	0.02	0.05	0.03	0.06	0.03	0.48	0.48	0.51	0.23	0.5	0.2	0.26	0.21	0.4	0.41	0.11	0.12	0.28	0.07	0.1	0.21	0.63	0.48	0.15	0	0.02	0.3	0.21	0.1	0.43	0.07	0.01	0.13	0	0.11	0	0	1.01	1.9	1.53	1.07	1.2	1.04	0.35	0.67	2.65
ENSMMUG00000000406	0.12	0.08	0.12	0.07	0.11	0.07	0.01	0.08	0.17	0.17	0.16	0.11	0.16	0.11	0.19	0.08	0.12	0.17	0.06	0.35	0.28	0.03	0.1	0.26	0.17	0.08	0.1	0.15	0	0.17	0.13	0.39	0.4	0.44	0.06	0.33	0.37	0.1	0.15	0.16	0.27	0.51	0.19	0.07	0.41	0.17	0.15	0.19	0.24
ENSMMUG00000000407	0	0	0	0	0	0	0	0	0	0	0	0	0	0.08	0	0	0	0	0	0	0	0	0	0	0	0	0	0	0	0	0	0	0.09	0	0	0	0	0	0.17	0	0	0	0	0	0	0	0.04	0	0
ENSMMUG00000000408	0.17	0.11	0.02	0.21	0.29	0.36	0.16	0.19	0.17	0.23	0	0.14	0.03	0.17	0.4	0.09	0.22	0.41	0.16	0.04	0.09	0.04	0.12	0	0.23	0.4	0.17	0.11	0.12	0.33	0.25	0.36	0.14	0.12	0.08	0.11	0.18	0	0.14	0.05	0.29	0.31	0.43	0.12	0.65	0.04	0.17	0.34	0.42
ENSMMUG00000000411	14.31	15.37	15.45	13.92	15.39	13.25	11.78	14.69	16.51	16.5	20.94	18.33	22.39	19.52	18.57	17.84	15	14.33	15.99	16.96	19.23	16.46	22.71	20.6	12.55	12.38	12.83	12.82	15.43	12.06	14.91	12.54	20.87	19.91	19.12	23.62	30.33	23.9	24.05	23.07	20.73	19.6	22.34	24.51	25.6	21.43	20.31	24.78	21.34
ENSMMUG00000000413	0.34	0.74	0.73	0.53	0.31	0.46	0.33	0.4	0.59	0.26	0.44	0.33	0.44	0.52	0.52	0.28	0.59	0.81	0.77	0.36	0.66	0.41	0.71	0.25	0.66	0.89	0.79	0.89	0.59	1.16	0.43	0.71	1.16	1.35	1.03	1.24	0.93	0.98	0.97	0.95	1.41	1.36	1.22	0.9	1.01	0.99	1.32	1.03	1.87
ENSMMUG00000000414	0.02	0	0	0	0.01	0.01	0	0.02	0	0.01	0	0.01	0	0	0.01	0.01	0	0.01	0.03	0	0.02	0	0	0	0.01	0	0	0	0.01	0	0	0	0.02	0	0.02	0.02	0.01	0.01	0.03	0.01	0.02	0	0.02	0	0	0	0.01	0.01	0.05
ENSMMUG00000000415	4.31	4.57	5.27	5.63	7.13	6.77	5.01	5.73	6.98	8.26	8	7.14	6.53	6.96	5.92	6.36	5.51	4.82	5.77	6.54	5.32	6.02	6.74	5.27	4.48	4.59	4.1	4.69	6.3	4.35	6.03	4.82	11.32	13.32	12.93	13.85	12.78	12.12	12.58	12.32	13.82	15.65	13.88	13.61	12.01	13.8	11.97	12.96	9.97
ENSMMUG00000000416	0	0	0.02	0	0	0	0	0	0	0	0	0	0	0.05	0	0	0	0	0	0	0	0	0	0	0	0	0	0	0	0	0	0	0	0	0	0	0	0.1	0	0	0	0.04	0	0	0	0	0	0	0
ENSMMUG00000000418	35.15	34.02	31.04	33.97	30.48	30.42	25.22	27.14	36.2	32.29	42.67	26.78	25.7	22.22	21.75	23.01	82.08	94.45	55.41	36	50.41	60.9	65.18	55.82	68.93	51.13	41.96	29.9	56.03	30.99	29.57	45.69	18.67	20.12	28.6	20.1	27.39	18.82	26.85	18.5	49.73	40	42.71	30.88	38.68	36.91	21.94	30.42	41.53
ENSMMUG00000000419	3.6	3.24	4.71	3.6	3.52	4.09	3.42	3.78	5.46	6.08	6.87	6.73	5.99	6.31	6.55	6.62	4.42	3.91	5.16	5.64	4.32	5.01	5.39	5.12	3.76	4.39	3.12	3.21	3.63	3.58	3.75	3.38	18.25	18.67	20.24	19.2	17.62	15.74	19.15	15.65	21.1	22.87	21.26	20.63	16.44	19.81	17.22	18.17	15.06
ENSMMUG00000000420	0.01	0	0.05	0	0.01	0	0	0.01	0	0	0.04	0.06	0.45	0.16	0.4	0.22	0	0	0.01	0.02	0.24	0.12	0.15	0.03	0.02	0	0.08	0.05	0.06	0.06	0.03	0.04	0	0	0.02	0.06	0	0.03	0.05	0.03	0.11	0	0.01	0	0.1	0	0	0.05	0.02
ENSMMUG00000000421	1	0.88	1.61	1.2	0.91	1.2	0.77	1	2.05	1.59	2.55	2.77	2.18	2.06	2.48	2.88	3.21	2.82	2.16	2.78	2.44	2.44	2	3.07	2.69	2.98	2.22	1.79	1.26	1.79	1.52	1.53	29.96	30.29	33.58	29.9	24.69	23.04	24.15	25.21	22.05	24.58	20.33	19.63	17.98	19.69	20.07	18.57	13.28
ENSMMUG00000000422	36.15	38.26	30.29	32.19	18.61	19.71	19.87	23.59	24.98	22.15	27.75	27.05	22.69	32.11	30.61	25.96	25.12	27.26	21.7	28.13	22.35	24.48	23	21.25	18.85	23.09	21.12	20.99	20.52	21.77	16.04	19.02	36.54	36.72	29.96	36.74	34.99	39.08	32.61	30.81	21.67	24.06	19.19	21.6	23.4	21.86	18.22	16.74	28.05
ENSMMUG00000000424	4.26	4.57	5.17	3.63	3.24	3.15	3.3	3.39	5.31	4.94	6.91	5.71	5.68	5.7	6.5	6.58	8.41	9.5	6.34	5.17	6.18	8.63	7.67	7.39	8.57	10.22	8.49	6.34	6.38	5.53	6.01	8.83	7.19	6.41	6.75	6.09	6.42	6.87	7.23	7.43	20.9	22.69	21.71	16.51	20.36	24.09	18.59	20.89	9.57
ENSMMUG00000000425	6.37	6.68	6.33	5.45	5.78	6.08	4.82	5.69	5.76	5.22	5.76	5.78	5.88	5.47	5.85	6.1	4.31	4.46	6.39	6.32	4.67	4.6	5.63	5.24	5.88	5.07	4.89	4.72	3.91	4.65	5.29	4.71	19	17.03	19.27	17.63	16.35	14.92	16.57	15.52	11.29	11.2	13.12	12.13	10.22	10.67	11.37	10.95	9.87
ENSMMUG00000000426	12.42	12.86	13.85	14.27	16.17	17.75	9.85	14.02	18.13	20.23	14.92	12.26	10.56	12.39	9.16	10.58	10.25	8.48	8.14	10.31	6.86	8.11	9.86	6.5	9.36	9.09	5.66	9.87	8.56	7.43	8	5.19	3.19	4.01	2.94	3.74	4.79	3.8	4.6	2.73	25.76	28.78	16.02	16.97	11.39	18.17	11.57	14.86	26.81
ENSMMUG00000000427	26.21	23.79	26.5	24	16.15	18.05	15.26	16.94	22.5	16.22	20.68	21.15	21.48	20.83	21.12	18.77	23.04	16.38	16.9	22.33	19.45	19.97	21.61	18.9	21.79	19.37	25.03	24.17	21.15	26.51	18.86	22.5	23.16	24.91	22.38	24.23	22.79	23.77	19.78	20.8	23.88	20.7	22.5	22.85	19.94	22.59	17.9	20.32	26.26
ENSMMUG00000000428	22.62	22.6	26.66	23.04	13.19	15.38	18.15	18.51	13.92	8.67	14.86	16.24	12.18	14.87	15.16	16.53	13.83	12.63	13.56	15.35	13.53	15.81	15.26	18.19	23.95	24.76	32.95	28.25	23.78	35.45	25.03	34.7	134	118.43	134.87	121.59	120.07	112.91	111.57	123.15	100.53	115.22	137.69	141.86	126.99	130.02	161.39	141.92	112.43
ENSMMUG00000000429	0.88	1.35	1.18	0.74	0.32	0.57	0.43	0.6	1.46	1.69	4.28	3.7	4.19	3.94	4.33	5.68	1.29	1.83	2.69	3.22	1.96	1.89	2.29	2.72	1.72	1.73	2.42	1.59	1.02	2.07	1.34	1.75	3.3	3.21	2.8	2.84	3.58	2.95	3.42	3.42	3.01	3.29	5.38	4.32	4.24	6.12	4.65	6.5	2.8
ENSMMUG00000000430	3.6	3.28	3.02	3.04	1.77	2.23	2	2.4	4.18	3.26	3.68	3.5	2.45	2.61	2.83	3.39	2.05	1.82	2.18	3.15	1.87	1.99	3.07	2.54	3.45	2.57	3.2	2.5	1.83	3.03	3.72	3.91	10.82	9.13	10.19	11.01	7.23	11.86	10.15	9.47	8.07	11.46	8.58	7.18	10.24	8.68	11.29	11.38	11.58
ENSMMUG00000000431	0.1	0.02	0.2	0.08	0.02	0.05	0.04	0.1	0	0.01	0.05	0.01	0	0.02	0.05	0.03	0.18	0.09	0.11	0.06	0.11	0.1	0.08	0.01	0.04	0.02	0.22	0.06	0.01	0.03	0.16	0	0.19	0.18	0.4	0.3	0.27	0.14	0.17	0.33	0.12	0.19	0.24	0.34	0.26	0.4	0.07	0.39	0.23
ENSMMUG00000000433	0.34	0.37	0.61	0.23	0.23	0.28	0.15	0.29	2.22	2.21	2.48	2.27	1.97	1.91	1.59	2	1.59	1.24	1.24	2.07	0.94	1.42	1.47	1.55	1.57	1.31	0.51	0.69	0.5	0.53	0.54	0.46	63.33	82.47	62.73	71.45	66.56	42.88	56.13	53.27	32.36	33.6	23.08	22.06	18.78	24.95	18.48	19.86	13.57
ENSMMUG00000000434	104.92	107.99	115.56	98.7	63.04	68.25	71.58	79.3	162.2	89.7	139.77	134.15	123.29	123.26	125.62	121.75	199.37	172.11	163.11	203.46	183.89	161.81	197.52	183.28	162.32	136.67	155.23	141.91	129.69	150.99	123.62	150.3	148.62	116.81	127.49	125.67	130.04	135.67	114.88	133.81	224.02	150.52	183.19	158.72	175.26	154.67	166.44	148.27	177.64
ENSMMUG00000000435	24.32	25.89	24.59	24.17	21.6	19.03	20.23	21.52	23.18	24.36	24.19	25.51	28.48	27.54	30.87	24.73	23.03	19.41	22.52	28.07	29.94	22.83	26.83	23.13	19.69	18.81	22.56	20.16	24.18	20.93	22.78	24.53	35.05	32.12	32.49	34.55	38.84	31.61	33.48	35.95	30.38	32.26	34.31	34.7	35.28	28.01	39.11	30.6	27.68
ENSMMUG00000000436	0.12	0	0.02	0.03	0.04	0.08	0.06	0.07	0.03	0.05	0.1	0.02	0	0.06	0.03	0.14	0.04	0.04	0	0	0.07	0.04	0.04	0.03	0.02	0.02	0	0	0.08	0	0.06	0	0.05	0.07	0.05	0.09	0.14	0.14	0.12	0.15	0.02	0.08	0.09	0.04	0	0.06	0.06	0.1	0.02
ENSMMUG00000000438	1.71	1.81	1.84	1.54	1.54	1.55	1.11	1.74	1.42	1.23	0.92	1.24	1.18	1.2	1.32	1.38	1.13	1.22	0.97	1.05	0.79	0.74	0.91	1.33	1.05	1.44	1.14	1.35	0.77	1.09	1.41	1.57	1.49	1.04	1.55	1.75	0.51	1.93	1.94	3.9	9.23	10.53	8.81	7.85	8.72	9.06	10.48	11.04	9.46
ENSMMUG00000000439	4.32	4.64	5.19	4.06	3.58	4.13	3.65	4.21	4.57	4.47	5.57	4.61	3.38	5.21	4.6	4.09	3.22	2.72	4.46	4.38	3.23	3.5	4.5	4.05	3.19	3.34	3.67	2.7	2.64	2.89	3.24	2.31	9.58	10.6	8.64	10.35	11.21	11.19	9.18	9.82	7.87	7.7	9.23	7.79	6.03	8.6	7.86	7.3	8.38
ENSMMUG00000000441	0.01	0.05	0	0.02	0.01	0	0.01	0.01	0	0	0	0	0	0	0.05	0.05	0.01	0.01	0.03	0.01	0.1	0	0	0.01	0	0	0	0	0	0	0	0.05	0.02	0	0.03	0	0	0	0.02	0.04	0	0	0	0	0	0	0	0	0
ENSMMUG00000000442	10.04	8.71	12.03	8.56	10.68	9.99	8.99	10.45	9.1	10.36	10.02	9.73	11.87	10.84	11.27	10.99	8.35	7.44	12.12	9.87	10.83	9.17	8.65	12.17	9.28	8.55	11.75	8.3	10.3	10.35	10.87	9.42	10.78	11.18	16.4	12.27	13.07	11.69	13.17	15.97	8.28	9.96	13.66	11.62	13.28	11.1	13.31	12.49	10.83
ENSMMUG00000000443	0.82	0.46	0.41	0.51	0.32	0.29	0.5	0.22	0.13	0.14	0.22	0.18	0.35	0.16	0.35	0.24	0.34	0.19	0.18	0.2	0.15	0.32	0.9	0.19	0.32	0.48	0.5	0.33	0.43	0.55	0.81	0.34	1.07	0.8	0.43	0.28	0.56	0.32	0.72	0.37	0.81	0.56	0.45	0.36	0.39	0.46	0.74	0.35	0.55
ENSMMUG00000000446	24.07	23.95	29.34	22.44	22.79	21.59	30.27	29.72	24.64	26.71	32.86	33.72	31.82	33.33	40	38.78	19.22	18.41	34.43	30.64	30.5	28.53	32.94	35.67	18.49	18.99	26.81	20.56	24.98	20.26	27.84	28.82	15.99	13.27	24.85	16.19	20.47	16.81	21.03	25.4	17.52	18.61	28.63	25.8	27.93	26.15	36.6	31.89	21.29
ENSMMUG00000000447	0.02	0.08	0	0.02	0.01	0	0.02	0.01	0	0.01	0	0	0	0.04	0	0.01	0	0	0.02	0	0	0	0	0	0.15	0.07	0.22	0.03	0.08	0.14	0.19	0.07	0.18	0.07	0.02	0.14	0.01	0.03	0.07	0.08	0.01	0.04	0.03	0.04	0.04	0	0.01	0	0.06
ENSMMUG00000000448	0	0.01	0.03	0	0	0.01	0	0.01	0	0.03	0	0	0.01	0.01	0.01	0	0.01	0.03	0.05	0	0.03	0.01	0.01	0.01	0	0.03	0.01	0.05	0	0.09	0	0.01	0.03	0.03	0.01	0.05	0.01	0.06	0.03	0.04	0.01	0.01	0.01	0.02	0.03	0.02	0.01	0	0
ENSMMUG00000000449	0.71	0.72	0.54	0.79	0.69	0.7	0.81	0.92	0.85	0.6	0.99	0.93	1.13	0.94	1.09	1.28	0.89	0.92	0.98	0.88	0.88	1.21	1.75	0.96	0.66	0.92	0.65	0.84	0.63	1.46	1.05	1.04	0.93	0.96	0.92	1	0.88	1.22	1.15	1	0.82	0.73	1.08	1.08	1.5	1.02	1.59	1.29	1.12
ENSMMUG00000000450	0	0	0.01	0	0	0.01	0.03	0	0.04	0	0	0	0	0	0	0	0	0.01	0	0.01	0	0	0	0	0	0	0.03	0	0.04	0.02	0	0	0	0	0.01	0	0	0.03	0	0	0	0.03	0.05	0.01	0	0	0	0	0.01
ENSMMUG00000000451	46.47	45.49	43.26	54.02	55.62	55.81	48.3	53.93	45.03	60.77	71.24	60.98	77.32	79.44	70.73	66.47	37.42	38.04	48.86	50.59	60.54	59.98	85.28	57.11	30.74	29.84	34.36	39.55	48.56	44.64	43.3	38.6	62.49	63.22	67.29	75.2	99.11	90.25	96.32	73.9	50.57	50.19	53.62	57.02	53.07	55.69	48.61	61.8	49.32
ENSMMUG00000000452	7.83	7.8	10.8	8.84	7.05	6.26	6.84	6.47	11.83	7.62	12.41	8.28	12	11.55	15.1	11.51	9.59	6.35	7.61	7.81	7.22	11.57	12.05	9.59	8.16	12.01	14.34	13.74	11.74	13.91	9.74	9.15	30.12	28.41	26.56	23.86	30.65	39.25	31.24	28.35	13.25	17.28	16.08	15.71	20.05	17.31	20.53	18.42	17.18
ENSMMUG00000000453	1.65	1.42	1.75	1.48	2.03	2.65	1.71	1.7	1.38	1.74	1.73	1.46	1.97	1.81	1.39	2.12	1.63	1.08	1.72	1.65	1.31	1.9	1.57	1.41	1.85	1.75	1.92	1.1	1.8	3.04	1.53	2.28	9.92	11.82	10	11.06	9.84	17.47	12.85	10.19	4.39	5.15	4.97	4.74	4.69	5.61	5.14	4.56	4.05
ENSMMUG00000000454	0	0	0	0	0	0	0	0	0	0	0	0	0	0	0	0	0	0	0	0	0	0	0	0	0	0	0	0	0	0	0	0	0.61	0.65	0.55	0.53	0.39	0.6	0.45	0.57	2.66	1.84	2.67	2.04	3.51	2.71	2.23	2.73	1.69
ENSMMUG00000000455	5.99	6.36	6.58	6.01	6.23	6.05	5.35	5.71	6.42	5.76	6.58	6.63	6.25	6.08	6.83	6.74	6.2	5.9	5.81	5.83	5.2	5.23	6.59	5.85	5.7	6	5.99	5.81	5.76	6.36	6.18	5.2	12.11	13.11	11.69	12.47	12.27	12.8	12.84	12.56	9.15	9.05	8.81	8.84	8.25	8.3	9.75	9.57	7.81
ENSMMUG00000000456	40.09	37.35	39.91	39.03	34.79	34.92	29.38	36.56	45.01	36.33	47.87	41.24	42.92	48.24	40.8	39.08	40.05	29.28	38.37	39.4	36.32	38.95	50.05	39.76	36.64	33.8	39.84	40.06	44.93	44.47	39.93	39.35	95.63	112.54	96.63	110.04	98.27	127.69	99.19	102.69	78.53	65.9	77.6	76.81	70.11	78.71	71.14	77.18	67.02
ENSMMUG00000000457	12.29	12.56	13.5	11.27	8.93	10.23	8.41	10.26	15.42	12.62	12.71	12.1	11.33	10.15	10.24	10.75	10.72	11.13	11.05	11.08	8.66	9.11	7.58	8.99	12.71	13.2	13.25	12.69	9.75	12.09	11.03	12.36	23.95	23.64	24.43	22.65	19.33	16.93	18.69	20.51	19.24	21.41	21.13	17.6	17.86	18.4	20.64	18.76	16.57
ENSMMUG00000000458	0.5	0.53	0.86	0.48	0.46	0.45	0.71	0.53	0.75	0.73	1.06	0.93	0.98	1.5	1.05	1.23	0.69	1.3	1.35	1.26	1.25	1.74	1.55	0.87	0.75	0.65	0.59	0.51	0.8	1.08	0.84	0.47	894.06	846.55	1387.06	1073.9	1216.06	775.05	1023.53	1139.21	820.37	805.88	1351.45	1289.18	1458.49	905.25	727.42	1571.64	1157.85
ENSMMUG00000000459	43.58	37.23	47.47	42.61	39.84	35.31	32.18	38.76	33.06	27.47	39.78	37.97	36.69	33.71	43.04	34.75	25.08	22.45	32.37	35.76	30.83	28.4	34.33	28.95	27.84	22.03	31.97	26.59	29.52	25.97	29.85	30.07	29.89	28.28	33.99	31.58	33.98	38.41	35.41	34.23	33.12	33.86	40.37	40.24	33.2	36.51	40.89	34.69	37.44
ENSMMUG00000000460	0.01	0	0.02	0	0	0.02	0.01	0.01	0.01	0	0	0	0.01	0	0.01	0	0.03	0.01	0	0	0	0.03	0.01	0	0	0.01	0	0.05	0	0	0.04	0	27.82	26.86	26.63	30.36	28.66	33.2	30.92	29.1	38.57	34.53	38.88	38.57	41.27	41.12	45.91	38.42	29.85
ENSMMUG00000000462	29.35	26.34	37.24	26.39	24.74	21.94	25.39	27.97	30.61	30.23	36.69	36.59	34.43	32.59	42.08	35.8	28.12	26.45	37.69	35.01	33.52	27.22	31.91	32.15	23.94	23.48	33.75	26.57	29.88	28.44	35.59	32.47	12.1	11.78	11.96	12.43	13.47	13.78	16.07	16.07	20.97	24.87	30.61	28.42	23.27	22.33	29.87	28.9	30.5
ENSMMUG00000000463	0	0	0	0.03	0.03	0	0	0.03	0	0	0	0	0	0	0	0	0	0.08	0.06	0.16	0	0	0.06	0.09	0	0.04	0	0	0	0	0	0	0	0	0	0	0	0	0	0	0	0.11	0	0.16	0	0	0	0.03	0
ENSMMUG00000000464	0.76	0.72	0.73	0.9	0.73	0.9	0.56	0.66	0.53	0.64	0.5	0.65	0.45	0.4	0.64	0.51	0.48	0.39	0.53	0.41	0.53	0.42	0.25	0.4	0.62	0.44	0.6	0.36	0.39	0.45	0.48	0.48	3	3.24	3.37	3.24	2.52	2.33	2.82	2.76	2.69	3.05	2.63	2.79	2.35	2.51	3.03	2.48	3.81
ENSMMUG00000000465	0	0	0	0	0	0	0	0	0	0	0	0	0	0	0	0	0	0	0	0	0	0	0	0	0	0	0	0	0	0	0	0	2.98	3.09	4.35	4.32	3.74	4.71	5.87	5.28	2.53	2.51	3.43	3.09	3.81	3.43	3.49	3.58	2.73
ENSMMUG00000000466	1.97	1.9	1.57	1.76	2.06	2.33	2.01	2.22	1.16	1.14	1.18	1.05	0.96	0.82	0.86	0.82	0.89	0.86	0.96	0.99	0.76	0.75	0.96	0.75	0.83	1.02	1.16	1.21	1.83	1.24	1.57	1.34	3.58	3.97	3.95	3.59	3.43	2.73	3.61	3.15	2.68	2.87	1.67	1.34	1.69	1.62	1.39	1.38	2.28
ENSMMUG00000000467	0.03	0.04	0.02	0.05	0.01	0.03	0.02	0.01	0.01	0.02	0.03	0.07	0.02	0.01	0.01	0.03	0.03	0.01	0.04	0.07	0.03	0.04	0	0.01	0.02	0	0.01	0.01	0.03	0.01	0.01	0.01	0.09	0.02	0.04	0	0.02	0.01	0	0.01	0.07	0.04	0.06	0.05	0.05	0.04	0.02	0	0.03
ENSMMUG00000000468	0.03	0.08	0.02	0.11	0.02	0.03	0.16	0.01	0.02	0.03	0.03	0.04	0.03	0.07	0.18	0.03	0.04	0.04	0.04	0.05	0.1	0.08	0	0.06	0.06	0.09	0.04	0.1	0.06	0.02	0.12	0.1	0.09	0.01	0.09	0.05	0.06	0.03	0.18	0.08	0.02	0.05	0.01	0.04	0.03	0.11	0.07	0.07	0.04
ENSMMUG00000000469	0.07	0.05	0.03	0.08	0.09	0.1	0.04	0.1	0.03	0.18	0.12	0.04	0.11	0.05	0.19	0.06	0.07	0	0.1	0.16	0.06	0.05	0.01	0.11	0.04	0.06	0.07	0.01	0.16	0	0.12	0.1	0.03	0	0.02	0.03	0.01	0.01	0	0.03	0.04	0.07	0.18	0.11	0.01	0.03	0.21	0.04	0.06
ENSMMUG00000000470	0.03	0.03	0	0.01	0.02	0.02	0.04	0.06	0.17	0.06	0	0.01	0.03	0	0.02	0	0.04	0	0.06	0.01	0.01	0.01	0.02	0.03	0.04	0.08	0.1	0.09	0.01	0.06	0.03	0.02	0.03	0.12	0.04	0.19	0.03	0.05	0.03	0.04	0.03	0.04	0.17	0.09	0.01	0.06	0.08	0.03	0
ENSMMUG00000000471	0.02	0.09	0.26	0	0	0.02	0	0.03	0	0.02	0	0	0.02	0.03	0	0	0.02	0.23	0	0	0	0	0	0	0.04	0.02	0	0	0	0.03	0.03	0	0.03	0.04	0	0.02	0	0.02	0.08	0	0.02	0	0	0.01	0	0	0	0	0
ENSMMUG00000000472	0	0	0	0	0.01	0	0	0	0	0.02	0	0	0	0	0	0	0	0	0.02	0.01	0	0.01	0	0.01	0	0	0.01	0	0	0	0	0	0.01	0	0	0	0	0	0	0	0	0	0.02	0.03	0	0	0	0	0.01
ENSMMUG00000000473	0	0	0	0.04	0	0	0.01	0	0	0	0	0	0	0	0	0	0	0	0.04	0	0.01	0.02	0	0	0.03	0.01	0	0	0	0.04	0	0	0	0.01	0.01	0.01	0	0	0	0	0	0	0	0	0	0.01	0.01	0	0
ENSMMUG00000000474	0.64	0.71	0.71	0.76	0.78	0.76	0.56	0.68	0.86	0.59	0.75	0.61	0.78	0.83	0.75	0.72	0.54	0.71	0.45	0.51	0.52	0.84	0.69	0.57	0.64	0.68	0.89	0.58	0.76	1.2	0.58	0.54	1.89	2.69	3.2	3.03	2.5	2.74	2.5	2.32	2.36	2.27	2.07	2.25	1.89	2.1	2.16	1.7	2.06
ENSMMUG00000000475	3.25	3.68	3.7	3.76	3.16	3.38	4.28	3.48	4.5	3.55	3.65	4.92	4.48	4.24	4.07	3.95	4.82	3.97	2.96	3.77	3.73	5.26	5.85	4.97	4.15	5.24	4.69	5.9	5.58	7.08	5.3	5.31	14.96	13.8	12.34	15.2	17.5	20.52	16.7	14.49	24.85	22.29	19.77	24.52	22.98	25.53	21.26	28.21	23.64
ENSMMUG00000000476	0.4	0.37	0.39	0.27	0.38	0.26	0.35	0.31	0.33	0.11	0.43	0.36	0.4	0.58	0.48	0.45	0.4	0.44	0.31	0.58	0.76	0.57	0.33	0.5	0.54	0.39	0.5	0.49	0.4	0.71	0.22	0.3	0.55	0.65	0.42	0.74	0.33	0.58	0.81	0.69	0.58	0.56	1.16	0.92	0.44	0.7	1.53	1.1	0.5
ENSMMUG00000000477	2.54	3.16	2.44	2.9	1.87	2.09	2.18	2.58	3.6	2.74	3.02	4.54	3.55	5.14	4.09	4.03	3.87	4.33	3.04	5.08	4.69	6.37	5.86	4.75	4.11	4.17	3.11	3.83	3.11	7.02	3.89	3.69	2.13	2.38	2.09	3.11	2.42	3.57	2.33	2.55	8.63	9.08	6.54	11.19	9.88	9.51	10.96	8.53	7.14
ENSMMUG00000000478	27.09	27.77	28.43	27.95	24.87	24.11	23.62	29.07	28.33	30.2	35.97	31.17	35.91	38.09	33.02	32.67	25.3	23.44	25.92	29.47	31.26	31.77	40.25	27.31	21.5	20.04	25.13	27.99	32.52	29.99	26.5	28.81	31.69	31.03	30.61	34.78	40.33	42.35	41.38	35.95	31.19	29.11	29.66	34.17	31.94	32.57	27.63	34.51	35.88
ENSMMUG00000000479	5.26	3.96	4.37	5.1	4.77	3.95	3.99	3.99	4.57	2.75	4.38	5.09	7.54	6.55	8.05	5.41	3.93	3.29	3.5	5.39	6.43	4.19	6.8	4.38	3.69	2.67	3.58	3.82	4.22	7.11	4.39	3.63	11.54	10.26	10.97	12.56	14.54	14.85	16.21	13.35	11.85	10.94	12.3	12.36	15.86	15.15	15.33	13.38	7.98
ENSMMUG00000000480	6.14	5.22	8.82	6.05	7.18	6.94	6.59	7.05	8.76	9.21	8.61	6.94	6.48	7.14	7.48	7.16	7.19	5.68	7.56	6.6	7.21	6.53	7.46	7.78	9.66	8.04	9.17	7.54	6.65	8.81	7.74	8.1	12.26	11.62	13.41	14	13.01	11.14	11.64	12.2	12.08	13.09	14.21	13.35	9.8	12.42	12.79	12.74	11.11
ENSMMUG00000000481	6.76	7.68	11.22	5.81	5.63	5.75	8.16	7.95	9.1	11.07	12.67	9.71	10.84	9.77	11.34	8.81	10.07	9.04	12.37	8.99	11.34	10.51	10.76	13.14	10.72	9.62	13.39	8.95	6.9	10.46	11.16	13.08	15.88	8.96	11.44	10.51	13.1	11.73	9.93	12.78	8.91	10.79	15.37	12.32	10.87	9.2	13.59	10.85	10.59
ENSMMUG00000000482	0	0	0	0	0	0	0	0	0	0	0	0	0	0	0	0	0	0	0	0	0	0	0	0	0	0	0	0	0	0	0	0	3.44	4.02	3.21	3.09	3.48	3.97	3.63	3.18	7.86	7.24	8.84	7.47	8.41	8.42	7.13	6.94	7.49
ENSMMUG00000000484	0.27	0.23	0.43	0.13	0.07	0.09	0.07	0.11	1.17	1.35	1.53	1.38	1.22	1.38	2.1	1.8	0.39	0.54	0.75	0.87	0.5	0.78	1.18	0.54	0.25	0.42	0.22	0.32	0.17	0.55	0.3	0.14	0	0.06	0.09	0.12	0	0.08	0.11	0.29	0.08	0.13	0.15	0.13	0.15	0.11	0.23	0.03	1.27
ENSMMUG00000000485	7.28	8.53	8.3	8.81	9.06	9.8	7.21	8.04	8.41	9.37	8.26	10.94	11.35	9.48	10.46	10.46	9.84	9.35	9.37	10.94	11.45	9.57	9.96	8.18	9.84	10.57	7.36	9.5	10.24	11.54	10.49	10.77	4.35	7.25	4.2	7.81	3.63	5.22	5.99	4.71	15.07	15.64	10.33	14	14.61	13.18	12.69	11.84	15.5
ENSMMUG00000000486	170.37	154.07	139.25	155.47	127.58	103.94	102.99	108.25	68.02	52.62	60.9	65.79	60.26	57.39	64.65	55.44	67.09	60.28	63.77	84.42	80.67	56.67	80.63	75.78	70.85	63.35	84.86	116.58	107.58	92.72	94.45	123.8	27.09	33.1	32.94	34.65	37.36	28.29	30.95	39.1	44.17	44.33	46.54	63.4	55.65	76.41	67.33	43.98	66.05
ENSMMUG00000000488	0.06	0.02	0.01	0.06	0.01	0.04	0.04	0.01	0.23	0.19	0.13	0.06	0.05	0.09	0.06	0.02	0.22	0.17	0.05	0.04	0.08	0.05	0	0	0.07	0.1	0.06	0.03	0.03	0.03	0.02	0.03	0.11	0.06	0.09	0.04	0.05	0.04	0.06	0.02	0.13	0.07	0.01	0.04	0.1	0.06	0.02	0.03	0.14
ENSMMUG00000000489	7.99	8.5	10.02	7.5	6.45	6.18	6.68	7.26	7.56	7.45	8.72	7.04	6.75	5.76	6.27	5.41	8.98	7.73	8.73	8.33	8.39	6.1	7.35	8.29	8.13	8.44	10.38	8.39	7.45	6.46	7.57	6.8	15.37	15.69	17.28	15.53	15.63	13.3	12.65	15.48	11.94	12.65	13.67	11.98	10.75	10.21	10.76	10.03	12.71
ENSMMUG00000000490	1.06	1.22	1.25	1.24	0.88	1.09	1.02	1.39	1.44	1.16	1.01	1.06	1	1.27	1.01	1.56	0.55	0.82	1.4	1.13	1.38	1.18	1.32	1.6	0.93	0.95	1.33	1.16	1.04	1.02	1.3	1.54	6.3	8.65	7.14	6.68	7.4	6.71	7.72	7.8	2.6	4.82	5.73	4.68	4.1	5.35	5.04	5.61	3
ENSMMUG00000000491	2.02	1.8	2.12	1.55	1.24	1.51	1.9	2.18	2.52	1.24	2.53	2.02	2.25	2.77	3.17	3.19	2.17	1.32	1.58	2.62	1.97	2.39	3.72	2.82	2.66	1.4	2.03	2.46	1.72	3.04	2.84	2.67	3.62	3.56	3.93	4.34	4.43	5.02	5.37	5.86	3.31	2.45	2.99	3.21	3.74	3.42	3.9	4.16	2.66
ENSMMUG00000000492	12.26	12.69	8.87	9.79	6.67	11.24	13.09	16.33	8.27	6.3	5.28	5.27	4.82	5.34	6.81	5.6	4.94	5	4.89	4.91	4.36	5.69	8.84	6.05	11.77	8.22	16.05	13.79	14.63	19.88	18.88	24.15	1.7	1.29	3.58	1.87	2.1	2.69	3.77	3.47	10.19	9.47	6.83	8.4	5.87	12.75	13.71	11.43	7.38
ENSMMUG00000000493	0.41	0.23	0.22	0.23	0.17	0.3	0.46	0.36	0.21	0.11	0.1	0.13	0.12	0.03	0.19	0.09	0.05	0.24	0.12	0.15	0.25	0.09	0.13	0.16	0.13	0.2	0.14	0.13	0.51	0.53	0.37	0.5	0.21	0.12	0.45	0.3	0.18	0.12	0.16	0.34	1.4	0.81	1.02	0.69	0.86	1.75	1.21	1	0.76
ENSMMUG00000000494	7.74	6.29	5.47	5.85	7.63	10.06	7.83	11.36	5.36	7.61	4.6	5.39	3.81	6.54	4.12	7.67	5.58	5.79	7.68	4.39	4.1	6.9	3.32	5.96	7.15	7.7	4.45	4.56	3.52	4.99	4.57	5.51	10.47	10.68	11.11	9.47	6.65	6.99	7.97	11.43	7.76	7.61	8.04	6.9	6.03	6.2	7.41	8.31	7.43
ENSMMUG00000000495	0.3	0.34	0.29	0.28	0.46	0.4	0.26	0.25	0.15	0.24	0.19	0.29	0.26	0.25	0.32	0.37	0.22	0.4	0.23	0.25	0.14	0.29	0.06	0.33	0.32	0.3	0.27	0.18	0.16	0.27	0.25	0.38	5.5	5.87	5.71	5.27	6.12	5.1	4.73	6.89	2.56	3.8	3.68	4.25	4.4	5.17	4.77	4.03	3.09
ENSMMUG00000000496	0.85	1.1	1.04	0.68	0.86	0.93	0.69	1.13	0.75	0.69	0.84	1.12	1.14	1.01	0.9	0.76	0.57	0.29	0.47	0.61	0.34	0.47	0.24	0.63	0.38	0.67	1.14	0.96	0.75	0.54	0.62	0.64	1.69	1.58	1.49	1.26	1.42	1.27	0.91	1.91	0.55	1.09	1.06	1.02	1.16	1.06	0.96	1.44	0.97
ENSMMUG00000000497	0.33	0.12	0.15	0.09	0.04	0.07	0.11	0.07	0.28	0.11	0.08	0.05	0.02	0.03	0	0.04	0.09	0.13	0.23	0.08	0.05	0.08	0	0.11	0.09	0.13	0.07	0.27	0.11	0.05	0.24	0.06	0.49	0.24	0.24	0.24	0.23	0.11	0.26	0.34	0.17	0.28	0.23	0.18	0.09	0.17	0.07	0.09	0.06
ENSMMUG00000000498	2.28	2.58	2.43	2.5	2.41	2.78	2.39	3.06	1.86	1.78	2.02	1.98	1.69	1.87	1.94	2.07	1.52	1.64	2	1.86	1.56	1.51	1.85	1.68	1.95	1.81	2.25	2.02	1.94	1.63	2.15	1.78	5	5.19	5.08	5.12	4.46	4.03	4.59	5.33	2.82	3.58	4.01	3.25	3.2	3.23	3.51	3.68	2.58
ENSMMUG00000000500	0.1	0.07	0.15	0.06	0.05	0.04	0.04	0.04	1.91	1.48	1.04	0.47	0.51	0.22	0.36	0.23	0.98	0.52	0.23	0.27	0.2	0.07	0.41	0.13	0.71	0.34	0.14	0.07	0.2	0.09	0.02	0.04	0.58	0.45	0.32	0.63	0.47	0.19	0.32	1.84	1.05	0.57	0.41	0.41	0.33	0.44	0.52	0.46	2.93
ENSMMUG00000000501	0	0.04	0.02	0.04	0.09	0.02	0	0.1	0.07	0.12	0.09	0.04	0	0.1	0.1	0	0.17	0	0	0.07	0.03	0	0	0.05	0	0.06	0.04	0	0	0.09	0.2	0	0	0.06	0.87	0.23	0.04	0.07	0.16	0.26	0.05	0.07	0	0.11	0.21	0.03	0.32	0	0.16
ENSMMUG00000000502	0.9	0.97	1.15	0.93	1.2	0.79	0.82	0.87	1.05	0.89	0.72	0.91	0.86	0.69	0.81	0.96	0.45	0.49	0.82	0.78	0.51	0.71	0.78	0.78	0.77	0.62	0.88	0.64	0.8	0.78	0.68	1.02	1.04	0.93	1.15	0.93	1.44	0.68	0.86	1.21	0.62	0.64	1.1	0.69	0.82	0.78	0.84	0.87	0.9
ENSMMUG00000000504	0.43	0.38	0.54	0.4	0.29	0.19	0.34	0.28	0.32	0.15	0.32	0.34	0.12	0.18	0.23	0.31	0.23	0.21	0.38	0.28	0.17	0.22	0.24	0.27	0.38	0.26	0.5	0.44	0.33	0.4	0.4	0.51	0.75	0.73	1.09	1	0.74	0.92	0.8	0.88	0.84	0.89	0.89	0.93	0.49	0.86	0.94	0.67	1.59
ENSMMUG00000000505	1.78	1.66	1.92	1.7	1.92	1.94	1.51	1.99	1.5	1.79	1.26	1.59	1.33	1.08	1.8	1.43	0.97	1.04	1.15	1.39	1.08	0.79	0.94	1.02	1.15	1.24	1.36	1.41	1.5	1.34	1.64	1.56	3.63	2.98	3.41	3.07	3.12	3.38	3.44	3.92	1.91	2.12	2.11	2.58	2.22	2.42	2.49	2.41	2.32
ENSMMUG00000000506	0.01	0.03	0.03	0.04	0.05	0.08	0.06	0.04	0.05	0.05	0.12	0.04	0.14	0.03	0.04	0.1	0.04	0.01	0.04	0.02	0.06	0.03	0.08	0.05	0.05	0.04	0.24	0.16	0.21	0.17	0.08	0.08	0.43	0.17	0.11	0.16	0.1	0.1	0.12	0.09	0.01	0.03	0.01	0.02	0.09	0.02	0.07	0.02	0.02
ENSMMUG00000000507	458.8	527.63	438.23	321.85	225.62	219.76	246.17	242.28	578.34	480.33	391.68	383.04	280.6	276.98	305.34	242.77	564.64	496.85	322.46	337.53	266.57	253.49	323.25	283.09	490.71	440.97	377.46	361.28	366.16	272.38	303.95	323.33	967.81	989.28	944.72	832.76	835.69	709.28	731.84	803.99	487.38	501.87	342.61	337.77	240.6	257.53	288.34	239.87	503.78
ENSMMUG00000000508	0.03	0	0	0	0	0.02	0	0	0	0	0	0	0	0	0	0	0.02	0	0	0	0.02	0.01	0	0.01	0	0.01	0	0	0	0	0	0	0.01	0.01	0	0.01	0	0.01	0.03	0.03	0.02	0.01	0.02	0	0	0	0	0.01	0
ENSMMUG00000000509	0	0	0	0	0	0	0	0	0	0	0	0	0	0.03	0	0.04	0	0	0	0	0	0	0	0.01	0	0	0	0	0	0.05	0	0	0	0	0	0	0	0	0	0.02	0	0	0	0	0	0	0	0	0
ENSMMUG00000000511	20.45	21.76	19.95	18.44	17.56	18.11	17.54	18.38	18.56	19.11	18.56	18.96	16.21	21.53	19.13	16.16	19.12	16.52	15.04	17.61	13.82	19.58	24.43	19.74	17.68	18.07	19.19	17.56	16.09	20.4	18.72	17.18	22.57	28.62	23.97	26.55	22.6	29.15	23.1	21.42	27.5	26.47	30.74	31.66	22.26	33.12	30.67	29.29	21.07
ENSMMUG00000000512	11.93	12.56	15.6	9.59	10.69	11.5	10.15	12.27	13.86	12.85	14.73	12.61	13.95	13.64	15.26	15.2	10.08	8.39	11.11	11.92	11.55	10.2	11.18	11.59	12.1	11.39	16.98	14	13.55	15.35	16.5	15.1	24.97	23.19	22.44	22	24.42	25.71	20.79	25.74	9.94	11.16	13.03	12.4	12.85	14.19	13.76	13.64	14.41
ENSMMUG00000000513	2.52	2.71	2.07	1.84	1.64	1.78	2.06	1.98	4.42	4.82	3.88	4.3	3.85	4.39	4.02	4.3	4.03	3.87	3.28	4.52	2.71	3.83	4.7	3.1	2.85	3.05	2.13	1.96	2.25	2.44	2.43	1.96	2	2.06	1.55	2.4	1.75	2	1.84	1.94	8.16	8.08	7.3	6.49	6.76	7.79	7.1	7.41	5.87
ENSMMUG00000000514	0.07	0.29	0.16	0.39	0.56	0.21	0.17	0.18	0.23	0.17	0.37	0.06	0.28	0.07	0.34	0.1	0.41	0.4	0.07	0.13	0.19	0.07	0.07	0.15	0.09	0.32	0.23	0.18	0.26	0.38	0.28	0.55	0.36	0.37	0.04	0.28	0.12	0.15	0.33	0.48	0.07	0.03	0.1	0.12	0.11	0	0	0.08	0.14
ENSMMUG00000000515	2.25	1.53	2.75	1.62	1.09	1.54	1.02	1.43	4.18	2.35	3.12	4.59	4	4.51	2.75	2.88	4.83	3.73	2.51	2.85	2.15	3.61	2.39	2.37	3.14	3.68	5.43	3.68	4.61	3.36	3.06	2.45	19.59	19.45	12.42	18.8	16.41	19.3	14.68	13.7	8.16	6.88	5.4	6.75	6.21	9.08	5.89	6.3	4.9
ENSMMUG00000000517	4	3.81	2.85	2.84	2.12	2.37	2.22	2.9	0.91	0.92	0.72	0.9	0.44	0.7	0.89	0.91	1.06	1.11	0.84	0.77	0.73	0.76	0.64	0.82	2.03	2.11	2.81	2.78	3	2.49	2.45	3.54	3.28	2.58	2.55	2.74	2.1	2.47	2.46	2.17	1.88	1.8	1.72	1.53	1.27	1.81	1.72	1.52	2.01
ENSMMUG00000000519	0.21	0.09	0.09	0.05	0.03	0.03	0.02	0.03	0.05	0.01	0.04	0.05	0.06	0.02	0.01	0.04	0.03	0.04	0	0.02	0.06	0.14	0	0	0	0.06	0.1	0	0.03	0	0.02	0	0.03	0.15	0.06	0	0.04	0.04	0.06	0.05	0.06	0.14	0.08	0.11	0.04	0.3	0.06	0.29	0.12
ENSMMUG00000000520	0.01	0	0.04	0	0	0	0	0.01	0.02	0	0	0	0.02	0	0.04	0	0.04	0	0.03	0.01	0.02	0	0	0.02	0	0	0.05	0	0	0.05	0	0	0.08	0.06	0.13	0.2	0.25	0.19	0	0.13	0	0	0	0.01	0.01	0	0	0.13	0
ENSMMUG00000000521	4.98	3.79	6.32	4.8	4.27	4.09	4.91	5.45	6.98	6.04	7.54	6.4	6.88	6.55	6.62	7.38	5.7	4.64	6.49	5.91	6.68	5.25	4.99	6.87	4.31	4.3	6.27	4.51	5.28	7.14	6.63	6.5	1.13	0.84	0.89	0.86	1.17	1.04	1.2	1.41	8.91	9.85	13.18	9.21	10.24	11.08	13.21	13.79	8.64
ENSMMUG00000000522	33.59	39.46	40.95	35.74	26.65	24.54	30.23	27.74	44.11	41.75	55.48	48.52	51.17	48.32	56.45	46.74	45.2	45.47	40.67	45.53	55.59	48.25	66.09	50.55	40.5	43.33	48.31	46.05	50.54	57.26	43.73	54.81	40.67	43.2	45.38	50.59	60.75	60.81	63.16	57.92	53.7	45.15	50.65	56.06	61.31	55.43	62.1	50.45	63.15
ENSMMUG00000000523	44.48	45.9	47.02	40.75	26.85	27.64	30.88	32.62	46.15	33.51	51.08	42	49.92	55.1	58.34	48.03	43.24	30.11	32.11	40.41	39.06	40.17	52.43	38.56	38.78	36.29	49.32	46.11	41.79	55.86	43	52.36	62.36	67.36	60.37	69.36	69.53	81.52	64.57	69.67	56.76	51.34	48.46	54.32	56.17	60.81	62.49	56.07	59.89
ENSMMUG00000000524	0.13	0.02	0.09	0.1	0.09	0.1	0.1	0.16	0	0.01	0.02	0.01	0.01	0	0.07	0.01	0.11	0.05	0	0.02	0.02	0.06	0.16	0.05	0.55	0.06	0.18	0.07	0.11	0.17	0.32	0.11	32.49	33.56	11.39	14.16	14.6	19.05	9.32	12.52	2.87	2.63	2.14	2.39	1.36	2.01	2.25	1.65	1.57
ENSMMUG00000000525	2.47	2.5	2.62	2.66	2.35	3.27	2.66	2.92	2.32	2.34	2.53	2.71	2.36	3.26	3.08	3.31	2	1.75	2.24	2.25	2.6	2.58	3.74	2.49	2.19	2.19	1.93	2.3	2.09	2.76	2.6	2.06	5.64	5.84	5.64	5.11	5.52	7.23	6.67	6.24	4.57	4.3	5.08	4.8	4.45	5.93	4.46	5.22	3.6
ENSMMUG00000000526	0	0	0	0	0	0	0	0	0	0	0	0	0	0	0	0	0	0	0	0	0	0	0	0	0	0	0	0	0	0	0	0	0.06	0.07	0.02	0.06	0.04	0.04	0.15	0.05	0.16	0.25	0.11	0.11	0.11	0.09	0.22	0.19	0.13
ENSMMUG00000000527	1.29	1.54	2.05	1.53	1.82	1.53	0.84	1.35	3.17	2.7	2.3	2.54	1.53	1.67	1.16	1.56	1.92	1.5	1.39	1.72	1.14	1.03	1.52	0.99	1.94	2.02	0.99	1.26	1.07	1.14	1.01	0.58	4.33	3.53	3.36	3.2	3.1	2.26	1.98	2.93	21.95	27.15	13.44	13.39	12.2	13.03	9.75	9.74	17.23
ENSMMUG00000000529	0.81	0.41	0.72	0.69	0.4	0.29	0.52	0.26	1.49	1.01	1.77	1.89	1.65	1.68	1.6	2.01	0.52	1.14	0.86	2.75	1.37	0.67	0.86	0.73	0.7	0.69	0.52	0.66	0.99	1.19	0.48	0.38	1.34	1.18	1.37	0.78	0.7	0.84	0.41	0.71	2.5	2.36	2.45	2.55	2.14	2.66	1.65	1.66	3.13
ENSMMUG00000000531	0.01	0.01	0	0.03	0	0	0	0	0	0	0	0	0	0	0	0	0	0	0	0	0	0	0	0	0	0.03	0	0	0.03	0	0	0	0	0	0	0	0	0	0	0.03	0.11	0.17	0.04	0.02	0.02	0.07	0.13	0	0.11
ENSMMUG00000000532	0.02	0	0.01	0	0.01	0.05	0.04	0	0	0.03	0	0.02	0	0.04	0.01	0.02	0	0.05	0.03	0	0	0	0	0	0.01	0	0	0	0	0.02	0.02	0.06	0	0	0	0	0	0	0.02	0.02	0.02	0	0	0	0	0.01	0.01	0.02	0
ENSMMUG00000000533	0.07	0.09	0.1	0.08	0.11	0.07	0.07	0.06	0.04	0.06	0.04	0.08	0.09	0.05	0.06	0.01	0.04	0.03	0.06	0.06	0.1	0.05	0.06	0.02	0.04	0.07	0.03	0	0.01	0.03	0.06	0.05	0.05	0.1	0.05	0.09	0.11	0.13	0.1	0.06	0.06	0.02	0.04	0.04	0.04	0.08	0.03	0.05	0.04
ENSMMUG00000000534	0.3	0.37	0.3	0.21	0.23	0.29	0.11	0.19	0.2	0.17	0.15	0.16	0.18	0.18	0.2	0.25	0.12	0.11	0.14	0.18	0.15	0.09	0.22	0.27	0.12	0.19	0.17	0.13	0.13	0.05	0.14	0.09	0.12	0.12	0.07	0.09	0.1	0.09	0.08	0.03	0.23	0.36	0.2	0.23	0.23	0.21	0.25	0.27	0.35
ENSMMUG00000000535	18.92	19.75	26.57	23.98	21.05	21.76	17.36	23.8	17.88	15.14	17.1	17.14	14.67	14.5	16.91	17.34	15.8	16.43	15.87	18.88	14.88	12.22	13.69	14.79	21.55	18.64	25.47	22.92	24.29	20.92	21.05	25.77	13.59	12.92	18.56	14.27	16.27	14.36	15.94	18.43	18.59	21.38	25.01	21.05	20.5	17.46	21.24	22.24	19.65
ENSMMUG00000000536	0	0	0	0	0.01	0.03	0	0.01	0	0	0	0	0	0	0.02	0	0	0.02	0	0	0	0	0	0	0.01	0	0	0	0	0	0	0	0	0	0.01	0.02	0	0	0.04	0.01	0	0	0.01	0.04	0	0	0.04	0	0
ENSMMUG00000000537	1.74	1.68	1.56	1.28	1.67	1.32	1.05	1.71	3.91	2.22	6.19	2.97	6.28	4.15	4.49	5.63	2.17	3.02	3.64	4.4	2.54	2.92	2.09	1.86	2.28	2.14	1.7	1.63	1.09	1.86	1.78	1.58	9.08	10.09	8.06	8.68	6.9	6.33	7.98	8.45	4.93	5.4	6.81	4.33	6.51	6.26	4.6	5.95	4.12
ENSMMUG00000000539	0	0	0.03	0	0	0	0.02	0.01	0.02	0	0.03	0	0	0	0.01	0	0.04	0.01	0.01	0	0.01	0.03	0	0.01	0.02	0	0.04	0.03	0.01	0	0	0.02	0	0	0	0	0	0	0	0.01	0.05	0.01	0.04	0.01	0	0.01	0	0	0.02
ENSMMUG00000000540	0.01	0.02	0.02	0.02	0.01	0	0.01	0.03	0.03	0.01	0.02	0.07	0.08	0	0.01	0.06	0.02	0.03	0.02	0.11	0.03	0.01	0.03	0	0.03	0	0.01	0.03	0	0.04	0.05	0.01	0.52	0.28	0.68	0.55	0.64	0.89	0.48	0.19	0.11	0.02	0.08	0.17	0.19	0.14	0.16	0.04	0.11
ENSMMUG00000000541	2.83	2.5	2.67	2.42	2.31	2.49	2.22	2.42	2.42	2.43	2.62	2.81	2.18	2.84	2.68	2.83	2.15	1.86	2.18	2.36	2.12	2.14	2.46	2.23	2.45	2.73	2.04	2.48	2.12	2.13	2.37	2.63	12.08	13.71	10.74	14.06	12.15	12.86	12.07	12.11	8.49	8.16	8.57	7.84	8.28	7.86	8.68	8.33	4.92
ENSMMUG00000000542	28.45	24.39	20.96	22.48	15.42	14.9	17.12	16.17	21.96	15.08	19.66	23.81	21.24	25.71	31.23	22.88	26	19.71	19.81	25.41	28.53	26.39	32.06	26.47	22.6	18.76	19.48	21.28	20.71	21.5	23.96	21.72	16.49	13.79	8.99	11.19	10.16	9.53	10.4	8.83	19.76	15.74	13.42	18.29	14.72	12.09	21.35	14.07	19.09
ENSMMUG00000000543	0.02	0.05	0	0	0.01	0.01	0.05	0	0	0.01	0.02	0	0.04	0	0	0.02	0	0.02	0.04	0.08	0	0	0	0.03	0.05	0	0	0.06	0	0	0	0	0	0.01	0	0.05	0	0	0	0	0	0	0	0	0.01	0	0	0	0
ENSMMUG00000000544	1.35	1	1.52	0.76	1.27	1.66	2.74	1.81	3.1	2.9	5.86	4.64	5.87	7.39	6.18	6.83	2.01	2.61	4.52	4.19	2.65	4.03	3.1	1.79	1.24	1.33	0.9	0.87	0.64	1.65	1.9	1.05	1.9	2.64	1.36	1.98	2.53	1.49	2.44	3.06	2.45	2.34	1.86	1.45	3.03	3.56	2.4	3.92	2.54
ENSMMUG00000000545	0.38	0.34	0.51	0.36	0.2	0.6	0.13	0.4	0.47	0.33	0.65	0.64	0.62	1.25	0.65	0.63	0.45	0.3	0.4	0.55	0.36	1.05	0.48	0.5	0.42	0.32	0.27	0.51	0.29	0.82	0.23	0.39	0.47	0.3	0.34	0.68	0.25	1.12	0.27	0.41	0.77	0.6	0.72	1.05	0.64	1.56	0.88	1.18	0.72
ENSMMUG00000000546	0.49	0.39	0.38	0.55	0.23	0.24	0.47	0.37	0.67	0.32	0.25	0.66	0.49	0.42	0.62	0.53	0.62	0.43	0.53	0.61	0.57	0.37	0.64	0.46	0.51	0.55	0.43	0.6	0.33	0.61	0.53	0.63	0.51	0.45	0.31	0.39	0.38	0.47	0.47	0.43	0.68	0.52	0.74	0.41	0.68	1.4	0.62	0.5	0.58
ENSMMUG00000000547	0.56	0.84	0.67	0.71	0.71	0.56	0.77	0.87	0.44	0.43	0.58	0.39	0.62	0.44	1.09	0.79	0.38	0.39	0.48	0.47	0.41	0.58	0.28	1.02	0.85	0.57	0.57	0.72	0.38	0.69	0.74	0.63	1.27	1.09	1.82	1.43	1.46	0.96	1.47	1.44	0.43	0.89	1.07	0.76	1.32	0.78	1.06	0.93	0.31
ENSMMUG00000000548	0	0	0	0	0	0	0	0	0	0	0	0	0	0	0	0	0	0	0	0	0	0	0	0	0	0	0	0	0	0	0	0	0.12	0.2	0.17	0.1	0.12	0.37	0.33	0	0	0.07	0.03	0.09	0.14	0.04	0	0.08	0.05
ENSMMUG00000000549	0.09	0.07	0.04	0.02	0.12	0.1	0.02	0.01	0.12	0.04	0.01	0.12	0.06	0.01	0.03	0.08	0	0.05	0.01	0.03	0	0.01	0.01	0.08	0.02	0.05	0.01	0.11	0.03	0.05	0.04	0	0	0.01	0.01	0.01	0	0.03	0.01	0	0.1	0.08	0.01	0.07	0.01	0.14	0.06	0.03	0.01
ENSMMUG00000000550	0.01	0	0.02	0.02	0.01	0.01	0.02	0.01	0	0.02	0	0.01	0.01	0.01	0.01	0.03	0.01	0.01	0.01	0	0.01	0.04	0	0	0	0.01	0.01	0	0	0	0	0	0.02	0.02	0.03	0.04	0.01	0.01	0.04	0.03	0.01	0.02	0	0.02	0.01	0.01	0.01	0.01	0
ENSMMUG00000000551	0	0	0	0	0.01	0	0.01	0.07	0	0.06	0	0	0	0	0.03	0.02	0.04	0	0	0	0	0	0	0	0	0	0.02	0	0	0.02	0	0.02	0.07	0.04	0	0	0	0.04	0	0	0	0.02	0	0	0.09	0	0.07	0	0.03
ENSMMUG00000000552	0	0	0	0	0.01	0	0.01	0.01	0	0	0	0	0	0.01	0	0.01	0	0	0	0	0	0	0	0	0.02	0	0	0.01	0	0	0	0	0.01	0.02	0.02	0.01	0	0.01	0.02	0.01	0.01	0.03	0.03	0	0	0	0	0.01	0
ENSMMUG00000000553	4.38	4.72	5.54	4.84	5.88	5.51	4.55	5.16	4.02	3.99	5.34	4.22	4.6	5.13	4.57	4.89	2.89	2.62	4.04	3.62	3.53	3.61	4.15	3.54	3.35	3.47	3.9	3.29	3.55	4.55	4.44	4.33	13.57	16.47	14.26	14.87	14.98	19.93	16.92	16.08	6.85	8	8.91	7.93	6.98	8.59	8.49	8.78	6.07
ENSMMUG00000000554	0.09	0.07	0.07	0.09	0.05	0.06	0.04	0.07	0.14	0.14	0.14	0.13	0.17	0.12	0.18	0.14	0.11	0.15	0.07	0.13	0.18	0.15	0.19	0.12	0.15	0.15	0.09	0.07	0.1	0.14	0.09	0.07	0.06	0.03	0.02	0.04	0.05	0.04	0.03	0.07	0.23	0.33	0.27	0.22	0.23	0.45	0.22	0.36	0.21
ENSMMUG00000000555	0	0.01	0.05	0.07	0	0.04	0.01	0.05	0.05	0	0.08	0	0.17	0.03	0	0.09	0	0.07	0.01	0	0.03	0	0	0.03	0.08	0.06	0.25	0.12	0.2	0.13	0.12	0.09	2.38	1.54	0.23	1.12	0.2	0.36	0.13	0.39	0.03	0	0	0.03	0	0.03	0	0	0
ENSMMUG00000000556	0.55	0.31	0.24	0.21	0.24	0.16	0.32	0.22	0.4	0.24	0.4	0.31	0.35	0.16	0.29	0.25	0.28	0.32	0.14	0.36	0.41	0.28	0.39	0.34	0.27	0.3	0.34	0.51	0.25	0.35	0.18	0.17	2.48	3.61	1.73	2.23	2.26	3.67	2	3.03	1.04	1.12	0.65	0.93	1.08	0.87	0.88	0.5	0.77
ENSMMUG00000000558	0	0	0.02	0.03	0.03	0	0	0.02	0	0.03	0	0	0.02	0.02	0.02	0	0.04	0.03	0	0.07	0	0.04	0	0.02	0.03	0	0.02	0.02	0.03	0.06	0.05	0.07	0.12	0.05	0.03	0.14	0	0.03	0.07	0.04	0.01	0	0.03	0.04	0	0.01	0	0	0
ENSMMUG00000000560	17.29	17.11	20.35	17.78	15.73	16.93	13.3	17.1	24.36	17.51	25.33	23.03	26.6	27.41	21.97	23.62	18.26	16.3	17.83	22.03	21.26	20.46	19.24	19.83	14.36	15.45	36.26	28.59	28.2	27.02	22.45	24.46	37.71	31.01	32.38	34.94	26.83	35.14	29.45	32.68	23.08	18.02	18.62	21.25	21.95	25.13	21.86	20.72	24.65
ENSMMUG00000000561	0.01	0	0.01	0.01	0.02	0.01	0.02	0	0.01	0.01	0	0.02	0.01	0.02	0.02	0.02	0.01	0	0	0	0.01	0.01	0	0.02	0.01	0	0	0	0	0	0.01	0	0.09	0.14	0.21	0.09	0.14	0.15	0.12	0.12	0.02	0.02	0.02	0.02	0.03	0	0.01	0	0.02
ENSMMUG00000000563	0.51	0.43	0.59	0.49	0.47	0.43	0.28	0.37	0.49	0.28	0.35	0.33	0.29	0.27	0.36	0.45	0.38	0.31	0.41	0.29	0.28	0.27	0.1	0.38	0.34	0.36	0.34	0.18	0.2	0.3	0.28	0.23	0.23	0.28	0.33	0.29	0.29	0.18	0.23	0.32	0.32	0.54	0.53	0.52	0.37	0.19	0.46	0.44	0.57
ENSMMUG00000000565	4.46	4.02	4.08	4.07	3.27	3.66	2.18	3.54	4.19	3.22	3.64	3.35	3.35	3.23	3.64	3.23	3.74	2.43	2.42	3.42	2.96	3.51	2.99	2.38	3.42	3.39	2.95	4.01	3.12	3	3.34	3.28	31.6	29.19	24.13	30.22	23.79	35.96	25.34	28.35	10.53	10.16	8.23	10.21	8.7	11.63	7.7	10.51	9.18
ENSMMUG00000000566	0.05	0.09	0.05	0.08	0.03	0.06	0.19	0.06	0.03	0.06	0.08	0.08	0.02	0.05	0.04	0.09	0.06	0.11	0.07	0.04	0.01	0.05	0.05	0.07	0.1	0.05	0.16	0.05	0.1	0	0.05	0.06	0.02	0.03	0.04	0.03	0.04	0.15	0.07	0.06	0.07	0.03	0.05	0.07	0.01	0.02	0.03	0.05	0.06
ENSMMUG00000000567	2.38	2.95	2.73	1.98	1.17	1	1.19	2.19	2.35	2.17	2.57	2.39	2.12	1.77	2.39	2.73	2.67	2.89	2.63	3.51	1.94	1.74	1.98	1.99	2.63	4.01	3.19	2.75	2.53	1.63	1.99	2.39	1.5	1.47	1.18	1.45	1.02	0.93	1.24	1.52	2.05	1.68	1.47	1.83	1.62	1.26	1.82	1.48	2.93
ENSMMUG00000000568	0	0.01	0.01	0	0.01	0.01	0.01	0.03	0	0.07	0	0.03	0.02	0.07	0.04	0.02	0	0	0.03	0.07	0.04	0.01	0	0	0.03	0	0.08	0	0.01	0.06	0.01	0.08	0.16	0.25	0.06	0.26	0.02	0.2	0.33	0.03	0	0	0	0.02	0	0	0.01	0.01	0
ENSMMUG00000000570	0	0.01	0	0.01	0.01	0.01	0.01	0.02	0.02	0.02	0.01	0.01	0.02	0.01	0.01	0	0.03	0.02	0.01	0.01	0	0.01	0	0.01	0	0.03	0.01	0	0.01	0.02	0.01	0.01	0.01	0.02	0.03	0.03	0	0.03	0.02	0.01	0.01	0.02	0.01	0.01	0.02	0	0.02	0	0
ENSMMUG00000000571	12.65	10.56	13.13	12.61	8.88	9.68	7.24	8.63	10.31	7.38	12.23	11.27	8.97	10.91	12.24	10.14	6.97	6.78	8.97	10.14	7.88	7.28	7.55	8.34	9	6.88	9.12	7.53	8.59	8.88	9.14	9.25	13.77	12.66	11.5	12.49	15.13	13.86	14.05	12.98	9.07	11.31	14.16	13.34	11.88	11.22	11.02	11.36	12.57
ENSMMUG00000000572	15.62	15.59	19.39	16.05	13.79	16.38	17.23	16.06	11.32	12.05	12.7	14.84	12.51	12.61	13.99	10.99	12.29	11.86	15.72	14.32	12.66	12.9	13.08	12.82	12.26	13.99	17.39	13.87	11.5	14.46	16.18	16.8	17.09	16.76	21.52	18.47	17.45	17.68	15.87	21.15	14.24	17.09	21.94	17.77	16.59	19.64	20.33	16.62	14.73
ENSMMUG00000000573	14.44	14.41	13.73	14.17	11.79	12.05	9.76	11.53	15.11	13.73	13.48	12.14	12.86	13.06	13.06	12.59	10.73	8.3	9.44	11.9	11.33	9.96	13.19	8.91	11.26	9.93	8.72	9.67	9.67	9.66	10.13	9.12	14.12	16.62	12.84	15.15	15.28	17.15	14.88	15.12	20.77	20.12	14.43	16.38	14.98	23.67	15.08	14.54	22.77
ENSMMUG00000000574	3.29	3.23	3.08	3.1	3.15	3.5	3.46	3.64	2.01	2.42	2.02	1.66	1.49	2.02	2.49	2.03	2.15	2.31	2.63	1.86	2.59	1.93	2.95	2.42	2.63	1.96	2.92	2.21	3.35	1.99	3.32	1.9	2.1	2.07	3.62	1.9	2.4	2.38	2.51	2.18	1.85	2.15	2.94	2.14	2.33	1.87	2	2.47	3.01
ENSMMUG00000000575	10.24	12.63	12.35	11.95	12.85	12.93	9.31	13.64	7.91	10.08	8.84	8.91	6.58	8.8	7.95	9.46	5.5	6.58	6.92	9.24	6.54	6.05	7.06	8.29	6.87	7.59	8.6	7.8	7.74	5.86	10.26	9.08	10.89	12.38	10.33	12.3	10.36	11.69	11.17	13.83	6.62	8.9	8.75	10.31	8.44	8.01	10.65	10.57	11.29
ENSMMUG00000000576	0.28	0.31	0.3	0.22	0.25	0.14	0.18	0.19	0.6	0.56	0.74	0.49	0.43	0.42	0.32	0.57	0.62	0.46	0.45	0.33	0.4	0.21	0.32	0.38	0.81	0.66	0.26	0.26	0.34	0.26	0.29	0.21	13.09	9.96	11.69	8.54	8.55	8.83	8.81	9.94	2.51	4.19	2.71	2.27	2.17	2.56	1.97	2.21	1.89
ENSMMUG00000000577	11.74	11.63	12.18	9.82	7.98	7.98	7.02	8.18	11.76	12.26	10.34	9.55	8.94	7.84	9.18	9.26	9.87	11.03	9.77	10.02	9.38	8.07	7.5	9.93	10.25	11.29	10.53	9.07	8.83	7.7	9.16	8.26	11.42	12.72	11.11	11.28	11.73	9.43	11.48	12	16.19	22.62	18.25	17.66	15.81	14.01	19.26	16.13	16.08
ENSMMUG00000000578	0	0	0	0	0	0.01	0	0.01	0.02	0	0.03	0	0	0.01	0	0	0	0.02	0	0	0	0.02	0	0.01	0	0	0.01	0	0	0	0	0.02	0	0.03	0	0.02	0	0.01	0.02	0	0	0	0	0	0	0	0	0.02	0.01
ENSMMUG00000000579	0.01	0.05	0	0	0.11	0.01	0.04	0.02	0.01	0.12	0.03	0	0.01	0.05	0.04	0.07	0.1	0.09	0.01	0.07	0.11	0.09	0	0.02	0.06	0.05	0.07	0.04	0.08	0.03	0.09	0	0.1	0.07	0	0.07	0.04	0	0.02	0.09	0.09	0.11	0.05	0.01	0.04	0.02	0.04	0	0.09
ENSMMUG00000000580	0.01	0.03	0.01	0.02	0.01	0.01	0.01	0.02	0.03	0	0	0.01	0	0	0.01	0.01	0	0.01	0	0	0	0	0	0	0.01	0.01	0.02	0.02	0.01	0.02	0.01	0.05	0.08	0.06	0.03	0.03	0.05	0.03	0.04	0.02	0.01	0.03	0	0.01	0.01	0.02	0	0.02	0.02
ENSMMUG00000000582	75.1	71.49	95.48	80.24	104.84	96.25	85.24	90.07	57.65	81.24	59.55	57.38	60.58	54.6	62.46	61.15	51.32	57.05	76.08	52.67	50.44	50.41	40.84	53.34	50.56	68.68	99.66	61.65	65.45	58.93	83.55	63.33	53.09	50.92	85.5	53.89	46.9	46.78	53.57	60.03	41.23	56.81	64.68	51.15	55.22	50.16	65.98	56.38	55.92
ENSMMUG00000000583	9.25	8.29	12.42	13.33	14.22	15.37	9.34	10.97	11.25	9.34	9.79	9.79	8.9	7.39	8.43	9.35	9.82	8.7	9.08	7.92	7.08	7.85	9.52	6.84	10.4	10.74	8.17	8.33	8.91	7.59	9.21	7.14	66.16	67.44	82.06	68.9	57.5	57.29	65.31	52.25	113.84	138.89	91.34	94.79	79.91	93.54	71.67	71.12	99.81
ENSMMUG00000000584	0.03	0.01	0.01	0.02	0.03	0.01	0	0.01	0.02	0.01	0.01	0.04	0.03	0	0.02	0.02	0.01	0.01	0.04	0	0.02	0	0	0.02	0.02	0	0	0	0	0	0	0	0.01	0	0	0	0.01	0.02	0	0	0.01	0	0	0.03	0	0	0	0.01	0.02
ENSMMUG00000000585	0	0.02	0	0	0.04	0	0	0	0	0	0	0	0	0	0.09	0	0	0	0	0	0	0	0	0	0	0.06	0	0	0	0	0	0	0.04	0	0.06	0	0	0	0	0	0	0	0	0	0.07	0	0	0	0
ENSMMUG00000000586	1.74	1.26	1.11	4.14	3.25	2.89	2.01	2.86	3.62	2.29	2.67	1.68	4.85	5.01	5.37	4.58	2.86	1.45	1.81	4.11	3.55	3.69	5.75	4.05	3.4	3.3	4.39	6.37	6.74	2.64	7.16	5.21	3.52	4.35	4.32	9.84	6.95	10.37	9.09	8.32	5.9	2.46	3.85	5.2	3.73	6.42	8.34	5.67	5.32
ENSMMUG00000000587	56.36	44.52	42.07	40.35	21.82	21.73	30.34	33.48	70.35	31.51	51.47	58.09	48.29	56.89	74.65	59.53	62.18	43.2	34.46	53.01	33.12	40.42	61.43	51.55	57.01	45.88	50.8	53.9	49.36	64	52.2	69.32	30.81	24.15	19.42	31.2	26.38	34.1	34.66	37.86	63.3	43.23	37.82	57.22	43.59	43.36	67.26	54.47	62.74
ENSMMUG00000000588	1.13	1.72	0.99	1.12	0.84	1.08	0.81	1	0.83	1.12	1.34	1.34	1.46	1.35	1.29	1.32	0.95	1.19	1.16	1.04	1.28	1.34	1.8	1.15	1.01	1.18	0.94	1.02	1.01	1.32	1.1	0.98	1.55	1.87	1.17	1.74	1.68	1.55	1.68	1.15	1.41	1.24	1.08	1.32	1.44	1.51	1.48	1.41	1.57
ENSMMUG00000000589	4.81	5.06	4.87	4.85	3.93	3.96	4.04	3.98	6.73	4.04	6.6	5.42	7.86	5.45	7.03	5.73	6.1	5.37	4.39	5.52	6.95	5.61	10.48	4.76	4.75	4.46	5.25	6.26	6.66	7.98	5	5	10.57	12.38	7.87	13.48	11.5	14.48	12.84	11.15	10.36	10.15	7.96	10.34	9.84	9.42	12.29	11.69	9.76
ENSMMUG00000000590	3.75	3.55	3.73	4.72	4.48	4.99	3.74	4.04	3.62	3.68	4.55	6.04	6.66	5.4	5.68	5.12	3.81	3.16	4.32	4.56	5.69	5.35	8.73	4.35	3.63	3.27	3.2	3.86	4.54	3.73	4.38	3.34	10.02	12.1	9.7	13.33	11.39	12.62	12.03	10.11	7.52	6.35	7.58	8.73	9.82	7.57	7.63	7.92	6.07
ENSMMUG00000000591	1.08	0.95	1.1	0.94	0.95	1.25	0.91	1.13	0.81	0.72	0.64	0.53	0.86	1.17	0.65	1.03	0.71	0.45	0.84	0.94	0.56	0.74	0.97	0.55	0.75	0.63	0.77	1.15	0.57	1.14	0.92	1.21	5.26	5.15	5.5	5.66	5.91	7.86	8.52	6.32	3.7	3.02	4.17	3.52	4.27	5.99	3.55	3.3	2.08
ENSMMUG00000000592	0	0	0	0	0	0	0	0.02	0.1	0.02	0	0	0.17	0	0.05	0	0.02	0	0.05	0.27	0.04	0	0	0.04	0	0	0	0	0	0.07	0	0	0	0	0	0	0	0	0.03	0	0.07	0	0	0.02	0.04	0	0	0.04	0
ENSMMUG00000000594	16.15	16.84	15.92	15.87	9.3	8.49	9.47	10.32	16.63	10.33	17.63	14.57	14.19	17.9	20.08	14.91	18.64	14.75	10.93	16.44	15.71	14.72	18.22	15.74	13.04	13.18	14.52	16.63	16.11	15.77	15.63	17.2	14.07	11.75	10.34	11.79	11.29	14.04	13.3	12.08	19.64	14.37	13.28	15.93	14.97	13.94	17.15	16.36	20.06
ENSMMUG00000000595	1.92	2.78	1.87	2.29	2.47	2.75	2.56	2.69	0.66	0.56	1.04	0.71	1.44	1.27	0.94	1.26	0.52	0.44	0.84	0.56	0.39	0.86	0.27	0.34	0.86	1.06	2.11	1.96	2.75	1.68	2.45	2.3	3.29	3.34	2.78	3.26	2.84	2.3	4.83	3.28	1.52	1.67	1.91	1.52	2.54	3.05	2.24	2.76	2.03
ENSMMUG00000000596	48.93	48.48	47.34	49.36	52.13	58.17	52.14	53.67	44.97	49.55	51.31	52.83	44.05	58.9	54.18	49.6	44.6	40.36	40.91	45.38	38.53	47	49.3	46.18	44.2	47.61	51.67	38.72	29.64	56.27	48.86	40	66.13	72.25	62.56	71.23	66.74	79.75	73.84	72.85	68.35	79.17	74.8	72.08	61.23	72.43	68.54	70.98	59.18
ENSMMUG00000000598	0	0	0	0.03	0.08	0	0.03	0.08	0.04	0.03	0	0	0	0	0	0	0	0	0	0	0	0	0	0	0	0	0	0	0	0	0.06	0	0	0.03	0	0	0.05	0	0	0	0	0	0	0.02	0	0	0	0	0
ENSMMUG00000000599	2.8	2.72	2.6	2.16	2.05	2.08	2.22	2.56	2.83	2.53	3.02	2.43	3.07	3.34	3.15	2.98	2.74	2	2.39	2.43	2.67	3.03	3.79	2.83	2.39	2.87	2.35	2.36	2.82	3.35	2.88	2.92	5.13	5.13	3.41	4.6	4.51	5.41	4.83	4.5	3.43	3.33	2.59	2.87	2.89	3.42	3.05	3.34	3.58
ENSMMUG00000000600	0.06	0.05	0	0.05	0	0	0.06	0	0.08	0.07	0	0.1	0.09	0	0	0	0	0	0	0.11	0.13	0	0	0.44	0	0	0	0	0	0	0	0.12	0.16	0.51	0.03	0.24	0	0.17	0.21	0	0	0	0	0.04	0.12	0	0	0	0
ENSMMUG00000000601	0	0.03	0	0.06	0.03	0	0	0	0	0	0	0	0	0	0	0	0.09	0.15	0.06	0	0	0.06	0.09	0	0.04	0	0.1	0	0.05	0.06	0	0	0.07	0.05	0.06	0.08	0.05	0.12	0.2	0.09	0.09	0	0	0	0	0.1	0.05	0.04	0.08
ENSMMUG00000000602	1.74	1.99	2.45	2.31	3.13	2.42	2.53	1.95	2.9	4.39	4.43	5.29	5.45	4.67	6.1	5.11	2.7	2.3	2.96	3.43	3.66	3.63	5.03	2.92	3.04	3.34	2.23	2.39	1.9	2.58	3.08	2.51	12.91	17.24	14.54	19.27	16.03	18.49	16.52	14.27	6.55	5.93	5.05	6.71	7.14	4.94	7.02	5.79	4.7
ENSMMUG00000000603	43.42	35.16	45.12	32.96	23.56	22.5	24.06	28.64	82.94	54.19	81.61	80.5	89.32	94.22	81.9	75.79	98.75	66.76	50.42	67.74	63.83	74.2	76.78	62.55	64.05	55.96	34.28	39.66	42.05	56.83	31.3	37.16	14.62	12.96	12.83	18.04	20.39	23.84	19.71	19.53	112.15	81.57	63.12	73.95	73.78	74.22	66.08	62.93	134.47
ENSMMUG00000000604	0.73	0.59	1.21	1.18	0.87	1.33	1.15	1.25	0.94	1.47	1.49	1.75	1.41	1.63	1.99	1.97	0.76	0.72	2.22	1.23	1.03	1.32	1.85	1.95	1.46	2.09	1.06	1	0.38	1.1	1.22	0.34	1.88	2.09	2.72	4.05	3.09	4.6	4.55	4.13	1.9	1.98	2.27	2.75	2.17	1.93	2.22	2.91	1.1
ENSMMUG00000000605	6.42	6.19	7.29	6.69	5.98	6.72	6.3	6.06	7.42	6.45	7.61	7.61	6.15	9.09	7.94	7.66	5.82	4.79	6.17	6.06	5.7	7	8.11	6.18	5.46	5.66	8.25	6.4	6.88	10.49	8.01	7	13.69	16.45	14.76	15.09	13.64	19.48	15.49	15.41	10.5	9.6	9.52	9.57	9.18	11.77	10.69	11.03	9.06
ENSMMUG00000000608	0.09	0.27	0.28	0.11	0.1	0.13	0.09	0.11	0.18	0.11	0.24	0.21	0.33	0.13	0.15	0.09	0.25	0.2	0.15	0.29	0.05	0.19	0.19	0.3	0.32	0.03	0.16	0.23	0.09	0.31	0.22	0.43	1	0.73	0.9	0.85	0.6	1.35	1.07	0.88	0.75	0.79	0.92	0.54	0.8	0.85	0.43	0.96	0.84
ENSMMUG00000000609	23.07	17.88	20.83	18.25	14.68	14.4	15.07	12.64	29.2	18.46	32.16	23.19	30.64	31.23	31.98	22.23	21.96	17.63	22.99	25.25	24.88	24.55	32.13	20.95	18.94	18.42	21.45	20.82	24.15	34.8	22.2	18.54	21.07	25.29	23.28	25.59	26.49	33.51	28.79	23.62	33.2	23.58	28.89	32.22	28.44	31.21	35.8	25.72	29.79
ENSMMUG00000000610	1.2	1.46	0.83	7.88	0.86	0.71	0.68	0.46	1.03	1.45	1.69	11.24	1.63	1.63	1.72	1.51	1.49	1.72	1.99	8.51	1.98	1.74	1.97	1.57	1.32	1.5	1.5	5.1	1.54	1.43	1.29	0.89	1.78	2.48	2.32	5.47	3.31	2.18	3.21	2.11	1.9	4.7	2.5	13.43	2.95	2.45	2.21	1.58	1.41
ENSMMUG00000000612	19.86	19.69	19.29	16.8	12.17	10.94	11.53	14.4	18.83	15.79	19.8	19.27	21.04	18.3	20.86	21.15	19.14	18.81	17.28	17.52	21.31	20.59	23.26	19.95	18.05	15.23	17.85	18.09	21.83	20.26	15.95	23.76	14.82	13.83	12.38	13.96	17.93	17.4	18.27	14.59	19.09	14.58	14.83	16.91	20.12	15.14	15.52	15.04	22.29
ENSMMUG00000000613	26.44	27.44	28.03	25.17	21.09	22.53	20.38	21.73	44.32	34.31	46.82	49.72	44	46.7	46.96	44.72	40.72	42.3	34.39	42.46	39.85	40.23	44.84	39.59	33.82	34.87	28.4	27.18	35.58	38.08	31.54	30.43	33.3	34.05	29.7	34.22	38.67	44.2	38.82	35.68	61.68	53	43.99	53.64	55.91	54.74	54.19	52.03	47.96
ENSMMUG00000000614	0.87	0.73	0.76	0.74	1.28	1.15	1.35	0.67	0.56	0.98	0.65	0.77	1.18	0.78	0.68	0.81	0.87	1	0.87	0.9	0.95	0.83	0.86	0.69	0.9	0.81	0.94	0.8	0.71	0.35	1.34	0.75	2.51	3.96	5.17	3.98	4.51	3.45	3.25	2.84	1.14	1.22	1.81	1.35	1.5	1.86	1.46	1.44	1.37
ENSMMUG00000000615	2.35	2.54	2.37	2.59	2.64	2.71	2.18	2.45	3.3	2.59	3.18	3.19	3.15	3.33	2.77	3.28	2.99	3.48	2.65	3.13	2.95	3.38	3.19	3.54	2.87	2.83	2.43	2.35	2.38	2.99	2.38	2.79	5.06	5.18	5.37	5.72	6.45	6.73	6.17	5.32	5.14	4.28	4.59	4.9	5.23	4.81	3.95	4.82	4.24
ENSMMUG00000000616	0.02	0.08	0.04	0.05	0.02	0.02	0.03	0.02	0.06	0.04	0.1	0.13	0.13	0.13	0.15	0.15	0.08	0.05	0.05	0.03	0.09	0.08	0.13	0.03	0.1	0.12	0.11	0.06	0.14	0.09	0.09	0.04	0.8	0.63	0.63	0.89	1.3	1.33	1.73	1.46	0.31	0.34	0.28	0.27	0.15	0.25	0.22	0.36	0.08
ENSMMUG00000000617	20.57	20.98	17.7	24.32	27.3	31.33	23.83	26.67	18.33	22.01	23.09	21.37	22.99	25.67	23.42	22.89	14.54	13.34	16.45	18.61	16.83	18.07	25.8	17.45	15.41	15.68	18.3	20.3	21.18	23.33	26.71	18.72	39.13	48.69	42.56	48.01	38.96	54.8	44.49	45.48	35.62	39.31	33.74	39.42	31.18	38.08	31.51	35.93	27.01
ENSMMUG00000000618	53.66	53.16	60.16	54.91	55.48	50.53	51.36	55.58	53.12	59.36	63.98	57.64	61.19	56.29	69.74	60.6	58.12	58.58	59.12	58.61	65.55	60.74	66.93	69.65	48.64	50.71	60.55	48.86	55.69	48.4	53.56	57.41	48.99	48.33	56.98	48.05	56.13	49.85	49.85	63.31	42.85	48.18	56.19	50.82	54.83	50.86	67.08	55.57	43.7
ENSMMUG00000000619	0	0	0	0	0	0	0	0	0	0	0	0	0	0	0	0	0	0	0	0	0	0	0	0	0	0	0	0	0	0	0	0	0	0	0	0	0.05	0	0	0	0	0	0.03	0.04	0	0	0.03	0.15	0.06
ENSMMUG00000000620	6.18	5.03	6.37	5.38	6.36	5.24	4.7	5.99	10.18	9.49	8.75	12.4	15.08	13.43	12.81	11.34	8.77	6.59	7	10.94	11.91	10.36	13.53	10.64	7.82	5.27	5.5	6.11	9.51	8.6	7.27	7.33	7.49	7.25	5.58	10	9.69	10.63	9.09	10.13	13.15	11.77	11.66	16.04	15.74	13.36	13.95	15.51	13.33
ENSMMUG00000000621	0	0.02	0.01	0	0.01	0	0	0.01	0.02	0	0	0	0.05	0.05	0.01	0.02	0.03	0	0.1	0.01	0	0	0.02	0	0.01	0	0	0	0.01	0.1	0.05	0.02	0	0.04	0.01	0.08	0.04	0	0.08	0.03	0.02	0.03	0	0	0.02	0	0.04	0.01	0.03
ENSMMUG00000000622	2.04	2.29	1.84	1.73	1.99	1.64	1.67	1.94	2.32	2.08	2.59	2.6	2.82	2.71	2.72	2.02	2.06	1.89	2.53	2.11	2.55	2.14	2.09	2.05	1.67	1.7	2.05	2.09	1.9	2.15	1.9	2.01	2.08	1.99	1.94	1.64	2.96	3.07	2.29	1.92	2.94	2.29	2.35	2.98	3.65	2.48	2.81	2.38	2.58
ENSMMUG00000000623	1.43	1.21	2.24	2.26	1.67	1.75	2.19	1.81	0.97	1	1.02	0.86	1.12	1.11	0.7	1.14	0.76	0.83	1.47	1.19	0.96	1.45	1.21	1.28	1.65	2.32	3.04	2.89	2.11	2.53	2.46	2.09	1.62	1.43	2.31	2.57	3.39	2.79	4.84	3.58	12.11	15.58	12.82	12.92	12.29	13.83	12.32	10.67	5.99
ENSMMUG00000000625	0	0	0.03	0	0.02	0	0	0.02	0	0.04	0	0	0	0	0	0	0.03	0	0.05	0	0.02	0	0.02	0	0	0	0	0	0	0	0	0	0.11	0.08	0.12	0.05	0.06	0	0.16	0.1	0	0	0	0	0.02	0	0	0	0.04
ENSMMUG00000000626	0	0	0	0	0	0	0	0	0	0	0	0	0	0	0	0	0	0	0	0	0	0	0	0	0	0	0	0	0	0	0	0	3.02	3.43	2.21	3.11	3.83	3.03	3.55	2.79	2.14	2.11	1.44	2.05	1.19	2.49	0.96	1.44	2.88
ENSMMUG00000000628	36.06	36.61	37.16	32.26	35.3	33.83	30.27	36.5	31.01	35.06	29.83	27.67	27.95	26.64	30.56	26.88	29.71	26.62	25.78	26.75	24.42	24.89	24.69	25.45	28.81	30.8	33.55	28.04	31.39	28.87	31.83	31.93	26.72	24.91	29.26	25.14	24.99	22.85	25.19	26.32	30.87	34.11	33.34	30.76	29.42	31.22	33.45	31.07	37.76
ENSMMUG00000000629	0.08	0.01	0.09	0.01	0.02	0.03	0	0.03	0.01	0	0	0	0.11	0	0	0	0.03	0	0.12	0.03	0.02	0.04	0.01	0	0.08	0.03	0.01	0.02	0.14	0	0	0	0.27	0.17	0.22	0.15	0.14	0.1	0.23	0.2	0.33	0.04	0.07	0.03	0.12	0	0.03	0.05	0.06
ENSMMUG00000000630	0.46	0.48	0.69	0.57	0.63	0.52	0.5	0.67	0.5	0.76	0.5	0.66	0.47	0.53	0.5	0.64	0.49	0.4	0.7	0.45	0.48	0.59	0.62	0.61	0.51	0.69	0.86	0.91	0.54	0.67	0.76	0.64	5.15	6.34	5.43	5.74	4.17	4.2	4.83	5.18	1.52	2.32	2.16	1.79	1.91	1.66	1.74	2.05	0.92
ENSMMUG00000000632	9.79	11.47	12.92	10.88	8.53	8.29	8.24	8.7	13.58	15.23	19.04	17.27	15.53	16.98	16.5	14.91	12.62	13.83	12.73	15.62	12.61	12.06	14.29	12.28	11.26	13.2	13	9.93	9.92	13.83	10.57	10.59	19.34	21.34	16.02	17.83	18	20.35	17.35	17.75	19.97	22.52	17.03	19.02	16.51	17.1	16.79	16.45	17.62
ENSMMUG00000000633	2.94	2.2	2.68	2.51	1.57	1.81	1.94	2.24	3.18	2.71	3.41	3.09	2.86	4.39	3.39	3.03	3.56	2.63	2.18	3.48	4.65	3.88	3.9	2.92	2.87	2.09	2.41	2.12	2.46	3.91	2.65	3.31	12.89	12.11	11.14	14.02	14.93	16.84	16.81	14.87	12	9.94	9.11	11.79	9.06	10.79	7.13	8.04	8.47
ENSMMUG00000000634	2.9	3.76	3.91	3.3	3.47	3.91	4.29	3.97	4.36	4.77	5.04	5.67	4.81	5.52	5.35	5.65	4.07	4.11	5.28	4.7	4.89	5.49	5.23	5.86	5.1	5.74	5.08	4.16	3.57	6.58	5.22	4.99	17.25	22.77	21.37	20.34	17.34	21.67	21.45	24.9	12.31	13.12	11.27	12.82	10.77	12.51	14.57	14.26	10.79
ENSMMUG00000000635	2.42	2.34	2.7	2.08	1.76	1.83	1.96	2.52	6.9	7.2	6.92	7.45	5.03	6.42	5.26	5.5	6.84	5.33	3.92	4.91	4.45	4.18	5.66	5.35	5.49	4.55	3.49	2.61	1.84	3.1	1.95	2.19	122.68	105.95	118.16	97.19	105.29	131.98	114.37	114.17	30.35	24.07	20.69	20.63	16.34	22.39	18.93	17.73	17.81
ENSMMUG00000000637	7.21	7.19	7.71	6.91	8.11	8.05	6.08	7.39	6.65	7.46	6.36	6.05	5.02	4.97	4.9	5.08	6.95	6.13	5.58	5.32	4.76	5.07	5.03	5.13	6.37	6.18	5.22	5.57	6.07	3.98	6.2	5.06	13.86	14.12	14.32	13.37	12.7	11.67	12.62	11	20.01	23.83	16.86	14.42	14.2	17.76	13.06	13.04	14.92
ENSMMUG00000000638	0.13	0.2	0.15	0.12	0.09	0.06	0.07	0.12	0.21	0.2	0.14	0.32	0.24	0.2	0.25	0.33	0.16	0.07	0.38	0.23	0.24	0.13	0.19	0.41	0.25	0.14	0.52	0.23	0.28	0.34	0.19	0.37	0.17	0.15	0.32	0.22	0.1	0.06	0.16	0.2	0.34	0.09	0.47	0.37	0.47	0.19	0.28	0.21	0.29
ENSMMUG00000000639	151.81	160.29	163.86	188.59	209.07	166.05	213.98	218.27	113.21	128.21	244.44	130.57	171.81	211.65	162.77	132.59	177.64	140.16	312.85	148.97	220.76	226.71	390.52	278.53	105.65	93.06	155.73	174.65	222.86	152.05	194.9	162.15	50.64	41.94	97.83	58.7	96.17	88.91	79.89	92.76	133.27	112.99	184.29	171.55	145.99	196.39	228.23	194.37	133.41
ENSMMUG00000000640	0	0	0	0.01	0.05	0.03	0.04	0.05	0.05	0	0	0	0	0	0	0	0.03	0.04	0.05	0.02	0	0.07	0	0	0	0.02	0	0.02	0.02	0	0.03	0	0.07	0	0.05	0	0.02	0.02	0.02	0.02	0	0.01	0	0.01	0	0	0	0	0.03
ENSMMUG00000000641	0.52	0.44	0.35	0.32	0.37	0.36	0.39	0.3	0.22	0.24	0.25	0.26	0.28	0.14	0.11	0.14	0.24	0.21	0.25	0.16	0.12	0.18	0.12	0.12	0.39	0.39	0.7	0.49	0.58	0.65	0.54	0.62	7.7	8.05	10.47	8.06	6.28	5.98	6.14	7.06	8.28	10.01	9.86	9.02	8.91	8.85	9.5	8.23	7.01
ENSMMUG00000000642	1.66	1.56	1.78	1.5	1.68	1.49	1.56	1.82	1.67	1.41	1.77	1.39	1.53	1.47	1.67	1.78	1.3	1.03	1.44	1.34	0.97	1.38	1.35	1.33	1.63	1.2	1.87	1.47	1.6	1.36	1.77	1.61	7.74	6.99	6.44	6.82	6.82	6.14	8.64	7.35	7.48	7.58	7.38	6.43	6.8	7.37	7.72	6.57	6.01
ENSMMUG00000000643	8.3	7.75	8.98	7.91	7.25	7	8.88	7.68	8.13	7.43	7.63	9.84	7.95	9.05	9.92	9.1	9.46	8.25	8.06	8.68	7.73	7.96	8.03	7.66	8.05	8.53	8.47	6.83	7.35	8.22	8.37	7.67	13.67	14.39	15.82	14.05	14.19	12.2	15.6	17.09	15.73	17.82	18.15	16.78	18.94	19.64	23.06	20.57	13.66
ENSMMUG00000000644	3.63	4.03	5.02	3.85	3.11	3.81	5.22	4.81	1.91	2.13	2.95	2.33	2.33	3.23	2.64	2.83	1.9	1.65	3.28	2.9	2.36	3.47	3.67	3.45	6.59	6.51	10.62	8.59	5.9	12.34	7.82	8.85	8	8.69	7.86	8.11	7.34	9.53	8.47	8.83	4.99	4.74	6.9	7.09	5.36	7.21	7.7	6.74	2.88
ENSMMUG00000000645	0.56	0.56	0.73	0.58	0.58	0.75	0.45	0.71	0.52	0.49	0.49	0.71	0.43	0.66	0.39	0.77	0.53	0.42	0.74	0.85	0.16	0.59	0.43	0.45	0.75	0.65	0.71	0.55	0.44	0.58	0.71	0.36	16.55	16.87	20.47	16.5	13.58	14.19	14.86	14.53	7.26	10.84	11.18	10.31	9.59	10.85	8.71	11.6	7.34
ENSMMUG00000000646	33.93	36.16	33.78	32.81	23.71	22.66	28.31	26.48	14.96	13.81	20.62	16.75	19.41	20.55	18.54	18.45	18.11	14.37	19.47	17.12	21.58	20.57	33.44	22.43	25.82	25.21	41.16	41.06	42.48	41.93	34.09	51.35	13.15	13.36	17.08	16.19	21	20.43	22.89	17.62	12.92	10.12	15.89	19.82	17.5	14.81	19.29	17.14	15.53
ENSMMUG00000000647	0.06	0.03	0	0.03	0.03	0.02	0.04	0.02	0.01	0.03	0	0	0.03	0.03	0.01	0.09	0	0.02	0	0.01	0	0	0	0	0.07	0.11	0.18	0.11	0.1	0.05	0.09	0.21	0.02	0.01	0.03	0.04	0	0.01	0.06	0.01	0	0.05	0.01	0.03	0.02	0.01	0.05	0.02	0.01
ENSMMUG00000000648	0	0	0.01	0.03	0.01	0.03	0	0	0.03	0.01	0.02	0	0	0.01	0	0.01	0	0	0.01	0	0.02	0	0	0	0.05	0.01	0	0.01	0.04	0	0.01	0	0.12	0.12	0.16	0.08	0.08	0.09	0.04	0.07	0.05	0.02	0.02	0.02	0	0.05	0.07	0.04	0
ENSMMUG00000000649	1.42	1.39	1.17	1.42	1.24	1.14	0.99	0.93	1.56	1.07	1.51	1.45	1.71	1.74	1.62	1.5	1.42	1.05	0.83	1.18	1.56	1.25	1.65	1.35	1.36	1.37	1.78	1.54	1.72	2.57	1.87	1.82	0.8	0.9	0.74	1.07	1.2	1.15	0.89	0.97	1.87	1.3	1.47	1.58	1.92	2.1	1.51	1.77	1.74
ENSMMUG00000000651	0.12	0.17	0.51	0.16	0.05	0.08	0.08	0.09	0.36	0.58	0.54	0.45	0.45	0.43	0.47	0.34	0.35	0.23	0.41	0.71	0.28	0.24	0.31	0.5	0.76	0.67	0.27	0.39	0.25	0.47	0.23	0.65	0.08	0.09	0.08	0.1	0.06	0.07	0.06	0.11	3.7	3.35	4.43	3.62	3.51	3.73	3.5	3.18	1.97
ENSMMUG00000000652	55.26	57.72	60.77	51.58	47.82	48.88	46.02	47.56	59.3	55.85	60.16	57.49	50.16	51.48	58.68	47.52	49.66	40.65	41.61	50.18	42.32	43.45	48.11	43.26	45.14	46.58	52.6	43.37	44.01	53.11	48.2	42.67	43.55	41.94	43.85	40.63	41.71	39.04	37.02	43.51	50.07	54.11	52.68	53.6	48.72	49.6	57.78	50.71	51.44
ENSMMUG00000000653	1233.63	1072.9	1908.58	1053.21	726.4	568.52	855.68	905.69	2553.63	2270.29	2740.71	2227.37	2311.72	2166.07	2662.41	2202.72	2055.31	1478.3	1790.13	1939.71	2002.05	1347.17	2120.97	1972.83	1876.35	1727.71	2004.98	1369.72	1013.62	1439.89	1290.71	1392.5	765.84	580.13	587.16	645.09	581.82	575.27	682.92	618.02	1887.13	1784.27	2000.76	2122.68	1730.45	1614.85	2262.47	1743.82	2922.9
ENSMMUG00000000654	0.25	0.41	0.22	0.21	0.16	0.3	0.22	0.12	0.17	0.27	0.11	0.17	0.13	0.3	0.3	0.25	0.22	0.15	0.1	0.2	0.3	0.27	0.22	0.35	0.14	0.41	0.08	0.23	0.05	0.2	0.34	0.19	0.1	0.14	0.07	0.12	0.25	0.17	0.21	0.14	0.29	0.24	0.29	0.14	0.27	0.51	0.43	0.22	0.27
ENSMMUG00000000655	0	0	0	0	0	0	0	0	0	0	0	0	0	0	0	0	0	0	0	0	0	0	0	0	0	0	0	0	0	0	0	0	6.64	7.43	4.29	6.14	4.49	6.88	5.89	6.63	2.24	2.38	2.52	1.93	2.68	2.3	2.15	2.01	1.84
ENSMMUG00000000657	0.01	0	0.03	0.07	0.02	0.05	0.02	0	0	0.02	0.02	0.03	0.03	0.02	0.03	0	0.04	0	0.02	0.03	0	0.03	0.04	0	0.02	0.01	0.02	0	0.01	0.02	0.02	0.04	0	0.02	0	0.01	0.02	0	0	0	0	0.01	0.13	0.03	0	0.01	0.03	0	0.01
ENSMMUG00000000658	0.2	0.18	0.24	0.13	0.15	0.16	0.14	0.11	0.05	0.05	0.1	0.08	0.09	0.05	0.11	0.15	0.02	0.04	0.08	0.02	0.1	0.06	0.09	0.1	0.15	0.1	0.16	0.18	0.22	0.4	0.19	0.14	0.25	0.25	0.23	0.26	0.29	0.22	0.28	0.25	0.05	0.04	0.08	0.05	0.05	0.06	0.07	0.03	0.04
ENSMMUG00000000659	0.01	0.01	0.03	0.01	0.01	0.02	0.01	0.01	0	0.01	0	0	0.02	0	0.01	0.03	0	0.02	0	0	0	0.04	0	0	0	0.01	0.01	0	0.01	0.02	0	0	0	0.03	0.01	0.01	0	0	0.03	0.02	0	0.02	0.01	0	0.01	0.01	0	0.01	0.03
ENSMMUG00000000660	0	0.01	0	0	0.03	0	0.01	0	0.01	0	0.02	0.02	0.02	0	0.03	0	0	0	0.01	0	0	0	0	0.01	0	0	0.02	0.02	0.03	0	0	0	0.02	0.01	0.01	0.01	0.05	0	0.01	0.01	0	0	0	0.02	0.04	0	0	0	0.01
ENSMMUG00000000661	0.33	0.27	0.3	0.37	0.41	0.47	0.35	0.19	0.29	0.22	0.25	0.24	0.35	0.35	0.29	0.24	0.18	0.34	0.33	0.26	0.41	0.19	0.38	0.19	0.41	0.42	0.26	0.42	0.45	0.26	0.44	0.35	0.54	0.64	0.77	0.68	0.83	0.7	0.69	0.59	0.41	0.43	0.54	0.36	0.6	0.55	0.27	0.38	0.4
ENSMMUG00000000662	0.01	0.01	0.01	0	0.01	0.01	0	0	0.01	0	0.01	0.02	0.01	0.01	0	0	0.01	0	0.04	0	0	0.02	0	0.01	0	0	0.04	0	0	0.01	0.02	0.08	0.82	0.81	0.76	0.84	0.58	0.59	0.84	1.19	0.98	0.85	0.9	0.88	1.16	1.81	1.07	0.86	1.24
ENSMMUG00000000663	0.5	0.49	0.69	0.33	0.55	0.51	0.69	1.11	0.5	0.43	0.6	0.49	0.56	0.49	0.79	1.24	0.47	0.55	0.69	0.65	0.79	0.38	0.6	0.64	0.54	0.48	0.79	0.73	0.64	0.56	0.72	1.18	0.48	0.47	0.48	0.56	0.29	0.3	0.48	0.63	0.6	0.63	0.71	0.61	0.74	0.99	0.67	0.74	0.46
ENSMMUG00000000664	10.96	8.84	8.2	6.32	5.49	5.35	4.66	4.27	8.55	6.63	5.68	7.08	5.45	4.84	5.82	5.07	7.09	5.82	5.74	6.27	4.51	4	3.76	4.08	7.65	7.72	4.92	5.87	4.27	3.72	4.68	3.33	14.89	13.22	14.3	13.13	12.85	12.92	12.31	13.06	12.48	13.4	9.85	9.35	9.17	9.49	10.45	9.34	13.07
ENSMMUG00000000667	4.36	4.28	3.95	4.93	5.22	6.07	4.35	4.7	3.26	3.79	4.11	3.95	4.16	4.41	3.8	4.14	2.89	3.21	3.13	3.45	3.29	3.45	4.16	3.35	2.76	3.4	2.98	3.65	4.07	4.33	4.16	3.85	3.81	3.93	3.73	4.57	4.34	5.6	4.97	4.31	4.02	3.98	3.89	4.1	4.21	3.72	4.03	4.28	5.04
ENSMMUG00000000669	5.02	6.64	11.06	6.11	4.04	4.31	10.57	7.85	0.62	0.64	3.67	1.86	3.04	5.2	3.75	4.17	2.69	2.77	7.6	3.68	6.52	10.24	16.68	12.47	16.12	15.47	45.48	28.09	27.34	42.17	25.79	37.68	8.5	6.69	10.39	12.2	14.23	15.38	13.18	12.76	5.92	4.95	15.47	20.57	11.74	17.23	30.12	19.18	1.87
ENSMMUG00000000670	17.35	18.1	19.09	16.88	18.35	18.67	18.15	20.8	18.41	19.76	19.54	19.56	16.47	16.83	20.1	18.52	11.63	11.68	13.95	16.32	13.03	13.09	15.3	13.5	12.94	12.52	13.56	13.51	14.02	12.78	16.55	14.04	24.78	25.93	24.15	25.4	24.99	22.36	23.04	23.62	25.26	29.99	27.45	28.32	28.38	25.61	30.06	26.87	25.86
ENSMMUG00000000671	24.39	25.16	29.27	25.63	19.91	22.33	11.55	16.73	16.62	9.56	16.29	18.81	14.99	11.82	15.24	17.39	13.76	14.11	13.14	15.31	12.67	10.45	10.13	10.82	17.91	19.27	15.01	17.9	19.5	16.5	16.6	19.03	11.09	13.69	10.61	12.52	12.45	12.28	10.77	14.42	19.14	19.53	21.51	24.15	19.56	14.78	20.5	21.97	24.09
ENSMMUG00000000672	0.11	0.03	0.19	0.04	0.02	0.05	0.01	0.03	0.05	0.05	0.1	0.1	0.02	0.05	0.11	0.05	0.1	0.02	0.05	0.05	0	0.29	0.05	0.01	0.16	0.03	0.13	0.05	0.06	0.06	0.13	0.01	0.23	0.11	0.11	0.13	0.09	0.13	0.09	0.05	0.07	0.06	0.13	0.09	0.03	0.1	0.1	0.08	0.16
ENSMMUG00000000673	0	0	0	0	0	0	0.1	0.07	0	0.05	0	0	0	0	0	0	0.04	0	0	0	0	0.11	0	0	0	0	0	0	0.05	0.2	0	0	0.06	0.04	0.05	0	0	0	0	0.06	0	0.1	0	0.03	0	0	0	0.13	0
ENSMMUG00000000674	6.28	6.5	8.22	8.19	6.82	6.95	4.94	6.95	6.06	6.77	6.96	7.04	6	8.32	7.91	9.79	5.01	3.69	4.9	5.77	4.11	7.32	5.63	5.42	4.85	4.69	5.89	5.7	4.51	4.94	5.83	7.43	15.6	15.66	12.33	13.62	11.49	13.18	14.59	16.16	10.85	12.98	11.24	11.35	10.93	9.33	10.45	12.4	10.3
ENSMMUG00000000675	41.94	44.13	35.35	35.93	24.98	27.36	28.56	32.43	27.62	19.79	32.11	33.41	24.72	31.07	34.54	33.11	27.6	24.48	28.67	30.76	30.79	32.6	35.66	32.28	29.36	29.17	32.68	34.75	29.91	41.59	39.4	42.28	18.65	17.97	17.12	16.87	14.34	18.2	16.36	18.94	26.26	23.95	27.45	29.43	27.56	25.46	31.68	28.07	24.37
ENSMMUG00000000676	2.13	2.32	2.81	2.15	1.99	2.4	1.76	1.9	1.66	1.53	2.4	1.81	1.79	1.83	1.84	1.99	1.1	1.32	1.46	1.85	1.13	1.11	1.28	1.32	1.87	2.05	2.39	2.35	1.32	2.31	2.28	1.73	14.43	14.54	11.59	12.18	14.32	11.84	11.47	13.64	9.56	9.63	9.44	8.15	8.49	7.59	8.47	8.19	5.4
ENSMMUG00000000677	9.21	9.83	10.71	10.24	10.93	11.88	11	11.99	10.4	12.26	14.99	13.81	13.06	14.89	14.69	13.6	8.05	7.78	9.96	11.32	9.71	10.72	13.33	11.03	8.34	8.73	10.45	9.95	10.53	12.68	11.51	11.13	14.4	17.72	14.86	16.92	15.96	21.84	17.66	18.59	12.59	13.25	12.56	14.3	11.94	14.78	15.67	15.84	11.21
ENSMMUG00000000678	55.6	53.24	58.07	60.78	60.02	55.37	54.31	57.12	50.58	49.95	67.14	53.53	73.5	58.88	73.25	58.89	44.65	37.37	47.55	53.39	66.8	52.27	83.01	54.24	36.25	32.18	41.87	42.81	57.24	45.6	52.7	42.95	112.77	123.87	129.07	143.41	176.44	165.85	201.79	144.67	130.95	117.37	141.83	135.93	161.87	126.13	136.27	150.66	170.19
ENSMMUG00000000680	0.43	0.15	0.24	0.15	0.23	0.33	0.34	0.28	1.07	0.56	0.89	1.07	0.22	0.44	0.38	0.36	1.34	0.7	1.23	1.58	0.43	0.82	0.68	0.53	0.7	0.31	0.37	0.15	0.15	0.31	0.42	0.33	0.62	0.73	0.96	1.01	0.8	0.89	1.25	1.12	1.04	0.52	0.5	0.42	0.37	0.48	0.51	0.44	1.02
ENSMMUG00000000681	1.99	2.31	2.21	1.76	1.28	1.3	2.12	2.2	0.76	0.94	1.17	1.39	1.02	1.39	1.27	1.37	1.37	1.36	1.3	1.34	1.82	1.86	2.04	2.07	3.64	4.65	6.95	6.15	5.49	6.99	4.91	7.55	4.35	5.7	4.14	4.44	4.2	4.37	4.17	3.8	3.15	3.2	4	5.53	3.97	4.51	5.9	6.26	1.42
ENSMMUG00000000682	22.59	27.64	31.02	26.88	23.63	22.95	17.01	20.14	20.75	19.08	22.05	23.26	19.42	20.11	19.47	18.39	13.69	13.15	16.35	19.23	15.64	15.23	13.56	15.38	15.46	16.57	17.08	18.49	20.63	15.86	17.57	16.36	20.57	22.98	22.45	21.8	22.99	21.63	19.45	22.99	25.71	28.87	31.13	31.95	25.44	26.03	28.98	26.59	24.08
ENSMMUG00000000683	3.47	2.67	4.98	1.5	0.43	0.7	0.84	1.14	18.82	18.03	9.74	12.54	7.14	10.01	7.82	7.33	10.7	7.99	4.74	9.01	3.38	3.26	4.38	3.06	4.12	5.72	2.78	2.92	2.1	4.88	2.93	1.8	0.87	1.37	0.8	1.18	0.86	0.78	0.74	1.04	4.8	5.46	2.1	2.62	2.27	2.79	2.29	2.32	16.6
ENSMMUG00000000684	15.89	15.78	19.83	16.42	18.77	17.5	13.05	18.08	15.52	15.61	16.65	16.74	16.36	15.34	18.16	16	10.24	11.46	14.43	14.05	12.01	9.58	11.5	11.26	11.9	13.36	13.65	13.79	12.74	11.24	14.24	12.08	17.82	19.23	20.74	17.29	16.3	15.73	15.35	18.84	15.52	21.02	20.84	19.38	19.77	16.22	20.34	17.98	20.13
ENSMMUG00000000685	0	0	0	0.03	0.01	0	0	0	0	0.02	0.02	0.07	0.04	0.03	0.08	0.02	0	0.04	0.18	0	0.02	0.01	0	0	0.04	0	0	0	0	0	0.06	0	0.05	0	0	0	0	0	0	0	0	0.08	0	0.02	0	0.1	0.03	0.03	0
ENSMMUG00000000686	0.08	0.15	0.18	0.04	0.06	0.03	0.02	0.02	0.86	0.76	0.66	0.5	0.32	0.34	0.26	0.58	0.52	0.49	0.17	0.37	0.14	0.26	0.03	0.28	0.39	0.14	0.06	0.1	0.02	0.14	0.09	0.04	0.07	0.02	0.04	0.06	0	0	0.02	0.03	0.91	0.54	0.42	0.46	0.19	0.22	0.29	0.42	1.31
ENSMMUG00000000687	0.18	0.08	0.18	0.44	0.12	0.42	0.33	0.29	0.06	0.08	0.25	0.33	0.56	0.18	0.93	0.86	0.08	0.02	0.16	0.3	0.38	0.59	1.04	0.46	0.12	0.12	0.26	0.19	0.29	0.27	0.43	0.22	0.15	0.09	0.18	0.08	0.11	0.19	0.09	0.19	0.23	0.24	0.69	0.57	0.94	1.52	1.51	1.2	0.22
ENSMMUG00000000688	0.01	0.02	0	0.02	0.02	0.02	0.07	0.01	0.16	0.14	0.02	0	0	0	0.01	0.04	0.01	0.04	0.02	0.1	0.04	0	0.01	0.02	0.06	0.05	0.06	0.03	0.04	0.04	0.04	0.02	0.11	0.05	0.15	0.05	0.02	0.03	0.02	0.07	0.09	0.09	0.1	0.05	0.2	0.06	0.01	0.05	0.42
ENSMMUG00000000689	8.89	9.36	12.32	10.08	7.98	7.13	6.88	7.57	9.17	7.3	10.85	8.7	10.51	7.43	9.29	10.15	6.87	8.47	10.01	9.96	9.13	6.65	8.49	10.33	7.29	8.25	10.71	9.27	8.4	6.83	8.83	8.97	54.49	54.22	58.8	42.21	46.56	41.68	45.11	50.91	33.49	39.11	45.13	35.05	34.8	31.08	34.64	38.66	37.77
ENSMMUG00000000690	6.72	6.7	8.09	7.73	9.16	8.16	7.63	8.11	7.36	8.03	7.62	8.74	8.15	7.68	7.5	9.58	6.94	7.2	10.32	9.65	7.52	8.37	4.42	7.58	8.58	11.08	8.23	9.38	5.76	6.65	6.61	7.43	11.11	10.4	13.02	11.47	12.99	9.24	11.27	13.11	36.57	43.15	42.21	37.22	38.67	38.97	34.74	33.88	16.33
ENSMMUG00000000692	0.69	0.72	0.35	0.54	0.51	0.43	0.42	0.61	0.18	0.42	0.65	0.68	0.69	0.63	0.76	0.85	0.56	0.26	0.7	0.54	0.57	0.76	0.84	0.53	0.43	0.6	0.58	0.89	1.06	1.17	1.04	0.93	14.85	9.96	12.83	12.63	10.83	10.17	10.92	14.72	7.88	10.6	20.28	19.33	13.14	18.08	18.03	20.85	6.17
ENSMMUG00000000693	0	0	0	0	0.07	0	0.03	0	0	0	0	0.06	0	0	0	0	0	0	0	0	0	0	0	0	0	0	0	0	0	0	0.07	0	0	0.09	0.04	0	0	0	0	0.05	0	0	0	0	0	0	0.04	0	0
ENSMMUG00000000694	0.15	0.25	0.37	0.17	0.15	0.21	0.3	0.18	0.82	0.98	1.04	1.07	1.04	1.19	0.83	1.24	0.6	0.66	0.82	0.75	0.59	0.71	0.48	0.62	0.44	0.61	0.56	0.23	0.38	0.43	0.26	0.29	0.4	0.63	0.51	0.65	0.57	0.44	0.42	0.8	1.93	3.36	4.42	4.05	3.77	3.84	3.68	4.84	1.43
ENSMMUG00000000695	1.91	1.72	1.71	2.16	1.63	1.51	1.66	1.64	1.97	1.26	1.93	2.14	1.95	1.89	1.7	1.82	1.28	1.2	1.23	1.5	1.39	1.25	1.61	1.24	1.68	1.66	1.66	2.02	1.62	1.8	1.97	1.35	9.52	9.69	10.03	10.04	8.54	8.81	9	9.83	8.98	9.35	7.23	7.19	8.29	9.42	7.36	7.4	5.1
ENSMMUG00000000696	14.04	14.46	15.33	13.33	11.93	11.3	9.91	13.1	12.87	11.76	14.28	14.7	13.06	13.32	15.88	14.6	7.22	7.61	12.37	11.6	11.71	9.07	10.76	11.42	9.42	10.02	13.13	11.71	10.31	9.43	11.36	10.99	12.87	14.34	14.31	13.97	15.91	12.83	13.45	17.46	11.74	14.66	20.46	18.77	16.92	15.04	19.44	19.52	12.19
ENSMMUG00000000697	99.56	78.82	134.88	101.02	75.94	73.87	63.06	67.05	131.2	111.4	213.15	181.78	218.88	256.37	235.08	219.37	131.45	100.91	155.81	178.89	190.41	202.18	266.74	244.86	99.14	89.56	104.91	82.6	69.62	101.39	89.86	74.44	197.83	196.28	179.13	216.16	216.3	257.92	227.37	239.12	183.4	180.01	261.33	283.56	233.04	277.56	250.49	275.54	136.5
ENSMMUG00000000698	1.33	1.43	0.85	1.46	1.22	0.68	0.7	0.8	1.64	1.57	0.6	2.41	2.73	1.2	1.32	0.99	1.47	1.28	0.65	2.35	1.4	1.23	2.11	0.74	2.49	1.56	0.99	1.69	2.51	2.12	1.98	1.59	1.06	1.08	0.55	1.07	1.44	0.83	0.96	0.54	1.2	1.21	0.47	1.87	1.16	0.9	1.06	0.34	2.46
ENSMMUG00000000699	4.25	4.5	5.31	4.38	4.05	4.86	3.98	4.74	4.29	3.86	4.74	4.12	3.88	3.62	4.48	4.74	2.99	3.06	3.94	3.9	3.46	3.85	2.84	3.49	4.12	5.03	4.6	4.75	4.62	5.46	4.22	4.53	3.53	3.77	4.01	3.62	4.8	3.44	3.21	4.07	4.03	4.17	5.52	4.54	4.19	3.85	4.96	4.99	3.92
ENSMMUG00000000700	0	0	0	0	0	0	0	0	0	0	0	0	0	0	0	0	0	0	0	0	0	0	0	0	0	0	0	0	0	0	0	0	15.04	16.75	14.54	16.17	19.01	21	17.06	18.84	8.38	7.66	8.4	9.01	10.28	8.41	8.17	9.97	7.32
ENSMMUG00000000701	0.05	0	0	0	0	0.02	0	0	0	0	0	0.08	0.08	0	0	0.07	0	0.02	0.02	0	0.05	0.03	0	0	0.06	0	0	0.04	0.04	0	0	0	0.13	0	0.03	0	0	0.04	0	0	0	0.02	0	0	0.05	0	0	0	0
ENSMMUG00000000703	0	0.01	0.01	0	0.01	0	0.02	0	0	0	0	0.01	0	0	0.01	0.02	0.02	0	0	0.02	0	0	0.01	0	0	0.02	0.01	0	0	0.01	0.01	0	0.01	0	0	0.02	0.01	0.01	0.01	0.01	0	0.01	0.06	0	0	0.01	0	0.02	0
ENSMMUG00000000704	2.52	2.99	2.99	3.23	3.02	3.27	2.27	3.19	2.23	2.08	2.05	2.16	2.25	2.35	1.94	2.25	2.08	2.23	2.23	2.33	2.11	2.1	2.11	2.24	2.22	2.36	2.18	2.1	1.85	2.33	2.23	2.11	10.21	12.06	9.86	10.51	8.6	9.88	8.16	10.75	5.91	6.63	6.16	6.74	6.02	5.34	5.22	5.4	5.66
ENSMMUG00000000705	0.03	0.03	0	0.04	0.05	0.06	0.02	0.04	0	0.02	0.02	0.01	0.06	0.02	0.08	0.12	0.03	0.02	0.01	0.1	0.03	0	0	0.01	0.02	0	0.04	0.01	0.04	0.02	0.04	0.07	0.02	0.03	0.02	0.01	0	0.01	0.01	0.03	0.09	0.02	0.03	0.06	0.04	0	0.07	0.06	0
ENSMMUG00000000706	1.06	1.06	1.41	1.32	1.41	1.4	1.36	1.49	0.76	0.6	1.01	1.03	1.36	1.63	1.21	1.38	0.61	0.6	0.92	0.89	0.77	1.06	0.98	0.79	0.96	1.08	1.34	1.79	1.57	2.19	1.65	1.78	6.72	12.47	6.4	8	5.98	8.2	5.76	8.62	1.73	1.54	2.09	2.03	1.82	2.08	2.26	2.17	1.42
ENSMMUG00000000707	0	0	0	0	0	0	0	0	0	0	0	0	0	0	0	0	0	0	0	0	0	0	0	0	0	0	0	0	0	0	0	0	12.39	17.53	14.08	17.5	23.03	26.5	20.89	22.61	0.33	0.35	0.35	0.59	0.46	0.61	0.78	0.3	0.46
ENSMMUG00000000709	0.84	1.03	1.35	1.22	1.48	1.3	0.96	1.38	1.85	1.64	1.71	2.23	1.88	2.45	1.67	1.8	0.79	0.93	1.05	1.77	1.15	1.29	1.81	1.38	0.87	0.91	1.42	1.28	1.12	1.45	1.46	1.15	2.28	2.22	1.76	2.59	2.75	3.36	2.81	2.54	1.91	1.92	1.36	1.87	1.67	1.61	1.18	1.77	1.39
ENSMMUG00000000710	0	0	0.01	0	0	0	0	0	0	0	0	0	0.02	0	0	0	0.01	0.02	0	0	0	0	0	0.01	0	0.01	0	0	0	0	0	0	0	0.03	0	0.01	0	0	0	0.01	0.01	0.01	0.01	0	0	0	0.01	0	0
ENSMMUG00000000711	0.22	0.06	0.2	0.16	0.15	0.24	0.14	0.17	0.54	0.43	0.51	0.37	0.46	0.47	0.42	0.55	0.51	0.33	0.31	0.26	0.18	0.22	0.15	0.29	0.45	0.4	0.2	0.22	0.06	0.42	0.05	0.23	0.46	0.28	0.58	0.63	0.17	0.99	0.25	0.39	1.35	0.67	0.5	0.49	0.4	0.79	0.52	0.69	0.89
ENSMMUG00000000712	0.69	0.91	0.88	0.54	0.45	0.55	0.5	0.61	2.5	2.68	1.78	1.68	1.35	1.94	1.34	1.32	1.53	1.46	1.96	1.78	1.53	1.63	1.65	1.25	1.53	1.35	1.09	0.72	0.51	0.76	0.57	0.47	1.12	1.18	1.43	1	1.17	0.88	0.99	0.89	2.78	3.27	3.01	3.41	2.6	2.9	3.17	2.27	4.03
ENSMMUG00000000713	3.87	3.45	3.19	3.35	2.57	2.37	2.34	2.69	5.21	3.62	6.06	5.67	5.49	5.88	5.6	5.38	4.13	2.93	3.61	3.86	4.8	4.43	6.11	5.22	3.82	3.45	3.47	4.33	3.75	4.66	3.85	4.55	11.67	12.45	11.63	13.78	13.4	15.54	14.32	13.47	7.13	5.89	7.43	7.74	7.58	6.03	7.95	7.02	5.04
ENSMMUG00000000715	0.29	0.43	0.28	0.44	0.23	0.33	0.53	0.34	0.39	0.26	0.47	0.48	0.6	0.73	0.47	0.49	0.2	0.24	0.48	0.37	0.37	0.67	0.65	0.33	0.45	0.39	0.54	0.47	0.38	0.55	0.36	0.63	0.91	0.87	1.19	1.1	1.27	1.73	1.67	1.44	0.67	0.24	0.41	0.79	0.74	0.67	0.62	0.72	0.49
ENSMMUG00000000716	0.55	0.45	0.56	0.39	0.67	0.51	0.17	0.78	0.34	0.3	0.45	0.91	0.73	1.58	0.59	0.8	0.45	0.56	0.64	0.56	0.64	0.66	0.86	0.66	0.34	0.65	0.52	0.24	0.57	0.63	0.48	0.62	1.06	1.36	0.78	1.26	1.1	1.09	1.07	1.07	0.47	1.11	0.48	0.65	0.47	0.77	0.42	0.95	0.72
ENSMMUG00000000717	11.28	11.74	9.05	9.11	8.97	7.96	8.36	7.89	12.44	9.67	12.58	10.94	11.39	11.77	12.95	10.5	12.38	10.98	8.74	9.37	11.2	9.23	15.16	10.53	9.64	9.86	11.05	9.19	13.31	10.86	10.7	11.69	6.2	5.41	5.29	5.51	7.01	6.54	5.97	5.46	12.33	10.35	10.02	9.37	11	11.56	13.09	9.21	10.43
ENSMMUG00000000718	5.95	5.07	6.69	6.64	5.48	7.35	5.42	5.65	5.08	5.45	6.22	5.51	6.82	8.33	6.23	5.94	5.59	4.85	4.92	4.86	5.89	6.85	6.73	5.84	6.67	6.08	7.61	7.96	6.27	9.43	6.4	5.95	10.49	12.7	10.77	13.69	12.17	16.74	13.53	14.58	12.96	13.6	14.41	15.93	14.03	14.26	12.11	13.52	8.23
ENSMMUG00000000719	0.02	0.02	0.07	0.16	0.06	0.02	0.02	0.15	0.2	0.12	0	0.1	0.04	0.05	0.02	0.02	0.02	0.01	0.05	0.09	0.04	0.08	0.02	0.05	0.09	0.09	0.08	0.08	0.04	0.29	0.07	0.12	0.78	0.71	0.76	0.62	0.58	0.81	0.55	0.68	0.13	0.19	0.11	0.37	0.16	0.12	0.3	0.07	0.2
ENSMMUG00000000720	0.06	0.15	0.2	0.12	0.06	0.08	0.1	0.17	0.03	0.02	0.16	0.45	0.19	0.23	0.4	0.36	0.15	0.04	0.09	0.45	0.24	0.18	0.33	0.51	0.11	0.12	0.32	0.16	0.28	0.52	0.34	0.38	0	0.02	0.05	0.03	0.05	0.03	0.01	0.05	0.26	0.51	0.55	1.23	0.72	0.36	0.69	1.09	0.28
ENSMMUG00000000721	45.81	46.28	50.36	45.77	39.86	40.36	34.13	40	33.4	28.91	33.83	29.68	30.05	26.18	30.14	28.7	28.31	28.85	33.98	33.6	32.99	27.88	33.83	34.11	36.17	35.19	50.38	43.25	33.92	37.86	38.18	35.89	231.33	224.44	192	194.05	208.97	162.94	157.46	181.31	82.76	91.98	111.44	95.11	81.73	87.95	87.43	91.58	109.6
ENSMMUG00000000722	1.32	1.26	0.96	1.11	0.81	0.66	1.15	1.16	0.92	0.58	0.84	1.35	1.25	1.23	0.95	1.25	0.93	0.69	0.78	1.17	1.24	1.05	1.34	1.44	1.46	1.19	1.88	2.48	1.25	1.3	1.83	1.76	5.62	4.69	5.25	5.62	4.81	5	5.51	5.21	2.75	2.8	3.39	3.61	2.66	3.11	3.89	3.83	2.05
ENSMMUG00000000723	0	0	0	0	0	0	0	0	0	0	0	0	0	0	0	0	0	0	0	0	0	0	0	0	0	0	0	0	0	0	0	0	1.96	0.91	1.69	0.51	0.35	2.1	1.11	1.4	1.26	1.6	1.47	2.04	1.82	2.21	0.93	1.22	1.76
ENSMMUG00000000724	0.03	0.01	0.03	0.03	0.01	0	0.02	0.02	0	0.04	0.05	0.02	0.02	0.02	0	0.03	0.03	0	0.02	0.03	0.04	0.09	0.03	0	0.02	0.01	0.08	0.1	0.04	0.02	0.06	0.02	0	0.02	0.07	0.07	0.05	0.03	0.02	0.04	0.04	0	0	0.03	0.01	0	0.03	0.02	0.01
ENSMMUG00000000725	0.04	0.02	0	0	0.01	0	0	0	0	0	0	0	0	0.02	0	0	0	0.01	0	0	0	0.04	0	0	0	0	0	0	0	0	0	0	0.02	0	0	0	0.03	0	0	0	0	0	0	0.01	0	0.01	0.01	0	0
ENSMMUG00000000726	0	0	0	0	0	0	0	0	0.01	0.01	0.02	0.02	0	0	0	0.02	0	0	0	0.04	0	0.03	0	0	0.01	0	0	0	0	0	0	0	0.02	0	0	0	0	0	0	0.02	0	0.02	0	0	0	0	0	0	0.01
ENSMMUG00000000727	0	0.02	0.01	0	0.02	0.01	0	0.01	0.01	0.02	0.02	0.05	0	0	0.04	0.03	0	0	0.01	0	0	0.04	0.06	0	0.06	0	0.06	0	0.04	0.09	0.02	0.02	0.07	0	0.02	0	0.02	0	0	0.03	0	0	0	0	0	0	0	0	0
ENSMMUG00000000728	0.07	0.05	0.04	0.05	0.03	0.01	0.04	0.02	0.11	0.05	0.03	0.13	0.11	0.12	0.08	0.01	0.07	0.08	0.09	0.12	0.04	0.05	0.05	0.03	0.05	0.06	0.05	0.02	0.06	0.16	0.08	0.04	0.05	0.01	0.02	0	0.05	0.03	0.11	0.03	0.04	0.05	0.01	0.02	0.05	0.03	0.02	0.02	0.06
ENSMMUG00000000729	1.11	0.83	0.89	0.96	0.54	0.78	1.02	1.11	1.07	0.62	2.49	1.58	1.68	2.2	2.46	2.55	0.87	0.82	1.2	1.4	1.43	1.44	1.48	0.89	1.28	0.55	1.23	1.4	0.88	1.47	1.01	1.17	2.42	2.33	2.23	2.73	2.42	2.93	2.7	3.54	1.78	1.27	1.79	1.56	2.17	1.96	2.35	2.22	1.74
ENSMMUG00000000730	0.02	0.01	0.02	0.01	0.01	0.02	0.01	0.01	0.01	0.01	0.01	0	0.02	0.01	0.02	0.01	0.02	0.01	0.02	0.01	0.02	0.03	0	0	0	0.01	0.03	0.01	0	0.01	0.01	0.02	0.02	0.01	0.03	0.02	0.01	0.01	0.01	0.02	0.01	0.02	0	0.02	0	0.01	0.03	0	0.01
ENSMMUG00000000731	1.07	1.12	3.47	0.69	0.46	0.54	1.25	1	7.47	4.8	17.43	7.31	14.37	12.46	12.16	18.33	2.53	4.19	7.66	7.01	2.35	3.57	2.25	1.78	1.06	2.5	4.75	0.7	1.14	1.93	1.17	1.65	4.79	8.25	5.52	4.07	6.6	3.33	4.42	9.31	4.18	3.8	7.01	2.18	5.91	8.34	4.35	7.8	4.72
ENSMMUG00000000732	0.01	0.01	0.02	0.01	0.02	0.01	0	0.03	0.01	0.01	0.01	0.02	0.03	0	0.04	0.02	0.01	0	0	0.02	0.01	0.03	0.07	0.02	0.01	0.03	0.04	0	0.02	0.04	0.02	0.04	0.02	0.01	0.01	0.02	0.01	0.02	0.02	0.02	0	0	0	0	0.02	0.03	0.01	0.03	0.01
ENSMMUG00000000733	0.02	0.03	0.05	0.03	0	0.03	0.12	0.09	0.05	0.04	0	0	0.02	0.02	0.05	0.09	0.04	0	0.05	0.06	0.04	0	0.03	0.02	0.02	0.04	0	0	0.06	0	0.06	0.02	0.03	0.02	0.01	0.04	0.02	0.04	0.06	0.03	0.05	0.07	0	0.01	0.01	0.02	0.01	0.03	0.03
ENSMMUG00000000734	0.07	0	0.01	0.01	0.03	0.01	0.04	0.03	0.03	0.02	0.04	0	0.08	0	0.06	0	0.01	0	0	0	0.01	0.04	0	0	0	0	0.07	0	0.06	0	0	0	0	0.06	0.01	0.03	0.1	0.05	0.03	0.03	0.04	0	0	0.01	0.15	0	0.05	0.02	0.03
ENSMMUG00000000735	14.49	13.45	16.13	13.32	12.16	12.53	11.06	12.13	14.39	12	16.12	15.32	17.01	16.94	15.51	13.94	11.14	9.38	12.55	14.68	14.34	14.76	15.5	12.13	13.22	11.88	16.93	17.42	18.72	22.46	16.41	20.1	14.57	14.06	13.21	15.88	17.22	17.65	16.41	16.19	14.45	12.02	14.26	14.44	14.96	14.47	15.18	14.79	14.82
ENSMMUG00000000736	3.94	3.82	3.64	4.41	4.16	3.86	3.48	4.01	3.93	3.5	4.95	4.43	4.93	4.82	4.31	4.25	3.48	3.36	3.62	3.91	3.74	4.31	4.95	3.73	3.98	3.83	4	4.48	4.13	5.39	4.5	3.78	6.54	7.96	6.04	8.28	7.63	9.02	7.85	7.69	5.57	5.03	4.76	6.18	5.19	5.53	5.03	5.49	4.58
ENSMMUG00000000737	44.95	40	46.92	45.89	43.92	31.93	33.42	38.15	53.81	37.14	65.01	58.26	68.26	64.01	68.1	58.93	43.36	32.7	40.45	56.06	52.01	40.21	58.9	42.02	37.24	33.74	50.96	45.55	48.12	59.34	45.14	47.17	42.95	44.08	48.68	56.66	59.66	60.63	61.36	55.42	53.42	51.46	50.89	59.85	60.82	52.07	59.39	51.65	56.36
ENSMMUG00000000738	2.92	2.55	2.68	2.16	2.28	2.15	1.37	1.87	2.41	1.85	2.34	2.7	1.81	2.01	2.42	2.36	1.1	1.24	1.63	2.12	1.69	1.55	1.98	1.74	2.03	1.5	1.93	1.8	1.78	1.66	2.46	2.44	5.65	5.9	4.86	5.72	5.9	5.68	5.32	5.77	5.61	4.96	4.56	5.53	4.86	4.93	5.04	4.99	5.95
ENSMMUG00000000739	0.23	0.27	0.19	0.23	0.43	0.31	0.19	0.2	0.31	0.44	0.18	0.33	0.26	0.19	0.23	0.11	0.22	0.28	0.21	0.14	0.15	0.23	0.01	0.16	0.1	0.36	0.4	0.38	0.32	0.21	0.37	0.18	6.34	5.46	4.86	7.6	11.56	8.86	9.84	9.73	1.78	2.01	1.71	1.34	1.82	1.33	1.97	2.06	1.42
ENSMMUG00000000740	4.49	4.83	6.14	5.95	5.76	6.13	4.7	5.94	4.72	4.88	7.51	7.14	7.54	7.54	8.18	7.57	4.11	3.47	5.6	6.07	6.65	5.6	7.61	6.74	3.83	4.04	5.7	5.38	5.51	6.56	5.8	5.1	7.88	9.12	9.1	9.64	11.91	11.2	11.43	11.02	6.23	6.9	8.29	8.69	8.48	7.61	7.82	8.87	6.31
ENSMMUG00000000741	2.71	3.16	3	2.79	2.86	2.62	2.54	2.89	2.41	2.53	3.12	3.25	3.23	3.3	2.88	2.52	2.61	2.33	2.39	2.38	2.62	3.38	4.19	3.01	2.24	2.26	2.74	2.1	2.29	3.35	2.6	2.83	5.96	7.06	5.41	6.52	7.38	7.35	8.32	7.62	3.33	3.53	4.07	3.5	3.54	4.22	3.96	4.41	3.42
ENSMMUG00000000742	0.09	0.09	0.03	0.05	0.07	0.02	0.03	0.1	0.11	0.11	0.09	0.06	0.11	0.08	0.08	0.12	0.07	0.05	0.07	0.03	0.04	0.01	0	0.03	0.08	0.04	0.07	0.04	0.04	0.12	0.1	0.08	0.03	0.11	0.04	0.07	0.06	0.05	0.09	0.08	0.07	0.2	0.05	0.03	0.07	0.11	0.06	0.06	0.25
ENSMMUG00000000743	0.01	0.01	0	0	0.04	0.01	0.03	0	0.03	0.09	0.02	0.01	0	0.01	0.1	0.03	0	0	0.03	0	0	0	0	0.01	0.02	0.01	0.02	0	0.02	0	0.05	0	0.01	0.01	0.01	0	0	0.02	0.04	0.01	0.03	0.02	0.02	0.05	0.03	0.02	0.12	0.09	0.01
ENSMMUG00000000744	0	0	0	0.01	0	0.02	0.01	0	0	0	0	0.04	0	0	0	0	0.01	0	0	0	0	0	0	0	0	0	0.01	0	0	0	0	0	0	0.02	0.04	0.01	0.01	0.04	0.02	0.01	0.01	0.01	0	0.01	0	0.01	0	0.02	0
ENSMMUG00000000746	16.08	18.36	19.83	20.31	15.93	15.09	13.2	16.9	19.28	16.88	20.37	19.8	19.84	21.57	20.57	20.07	16.24	13.54	17.17	22.49	16.12	15.71	21.29	16.19	14.95	13.41	18.05	17.02	14.72	19.68	17.68	17.07	14.66	15.92	16.28	18.02	17.72	18.65	16.38	18.34	20.92	21.13	20.38	23.64	19.08	19.85	22.13	18.56	20.37
ENSMMUG00000000747	8.13	7.23	7.51	6.75	5.35	5.15	5.62	4.64	8.12	7.11	8.9	8.08	7.14	7.93	7.16	6.87	6.78	5.4	6.04	7.02	5.86	6.26	6.57	5.28	7.59	5.15	7.21	6.82	5.25	7.15	5.38	5.22	19.4	21.24	16.32	21.77	19.06	21.9	17.91	18.08	14.87	14.93	14.22	15.49	12.56	11.54	14.97	11.87	13.34
ENSMMUG00000000749	1.07	1.12	0.56	1.29	0.8	1.43	1.2	1.83	0.14	0.16	0.36	0.25	0.71	0.71	0.86	1.93	0.1	0.06	0.65	0.2	0.51	1.03	1.05	0.81	0.66	0.71	1.36	1.12	1.08	1.76	1.24	1.85	0.37	0.41	0.5	0.58	0.53	0.87	0.6	1.43	0.3	0.22	0.35	0.29	0.44	1.18	0.69	1.21	0.19
ENSMMUG00000000750	0.76	0.89	1.02	0.62	0.57	0.74	0.79	0.81	0.68	0.39	0.88	0.72	0.68	0.7	0.97	0.95	0.52	0.35	0.73	0.6	0.9	0.86	0.99	1.04	1.25	1.1	1.63	1.53	1.2	1.94	1.13	1.95	3.8	3.64	3.32	4.42	4.03	6.03	4.96	4.92	5.17	4.53	6.61	7.89	6.85	6.97	7.06	7	3.16
ENSMMUG00000000751	3.12	2.91	3.28	2.81	2.83	2.32	2.29	2.29	3.18	2.6	3.51	3.37	3.5	3.1	4.64	3.07	3.11	2.29	2.17	2.86	2.47	2.23	2.96	1.57	2.51	2.52	2.8	2.56	3.06	2.94	2.8	3.45	2.95	3	2.6	3.77	3.2	3.49	3.85	3.68	3.34	2.99	2.87	2.92	2.83	3.04	3.61	2.61	3.42
ENSMMUG00000000752	0.02	0.04	0.07	0.04	0.02	0.02	0.02	0.02	0.02	0.02	0.03	0.03	0.05	0.05	0	0.03	0.05	0.03	0.03	0	0	0	0	0	0.02	0.01	0	0.04	0.01	0.03	0.02	0	0.31	0.23	0.17	0.18	0.07	0.02	0.03	0.07	0.01	0.18	0.05	0.09	0.12	0.04	0.1	0.19	0.1
ENSMMUG00000000753	0.04	0.06	0.09	0.06	0.15	0.09	0.09	0.11	0.06	0.08	0.04	0.09	0.02	0.16	0.09	0.14	0.03	0	0.09	0.09	0.01	0.04	0.03	0.07	0.07	0.08	0.13	0.02	0.04	0.09	0.13	0.08	0.21	0.16	0.16	0.07	0.09	0.07	0.08	0.1	0.07	0.14	0.1	0.22	0.05	0.12	0.07	0.11	0.05
ENSMMUG00000000754	11	9.66	9.47	10.41	12.15	11.9	9.6	11.68	6.28	7.34	5.8	6.35	5.64	5.06	5.19	5.64	5.29	4.96	6.83	6.05	4.7	4.78	4.58	5.52	5.54	6.13	5.34	6.24	5.85	4.77	6.66	4.45	8.31	7.92	9.99	7.58	6.62	5.95	6.41	6.43	6.24	8.29	8.51	7.01	6.2	6.66	5.64	6.54	7.64
ENSMMUG00000000755	0	0	0.03	0	0.04	0.07	0.17	0.04	0	0	0	0.02	0.01	0.09	0.02	0.01	0	0	0.01	0	0.01	0.05	0	0.03	0	0.03	0.06	0.02	0.04	0.04	0.07	0.06	0.07	0.02	0.02	0.06	0.04	0.06	0.14	0.1	0	0.01	0.01	0.02	0	0	0.05	0.01	0
ENSMMUG00000000756	2.04	1.85	2.06	2.35	2.01	1.78	1.84	1.64	1.9	1.51	2.74	2.62	2.7	2.75	2.9	2.1	2.01	1.61	1.95	2.51	2.1	2.41	2.84	2.13	1.79	2.22	2.11	2.11	1.86	3.01	2.02	2.02	9.24	9.25	7.18	8.15	7.41	10.43	9.55	8.58	3.66	3.26	3.16	3.96	4.11	4.2	4.15	3.76	3.15
ENSMMUG00000000757	12.14	11.42	14.04	10.15	9.12	8.92	8.82	10.86	10.98	8.27	12.62	11.86	14.29	13.4	14.23	14.35	9.8	10.39	12	12.56	13.95	13.14	13.33	12.5	12.3	13.09	17.03	15.02	14.99	17.67	14.78	16.72	17.67	18.51	17.64	20.65	23.52	22.75	20.35	23.73	13.8	12.62	17.53	15.74	16.7	14.02	18.08	17.48	12.98
ENSMMUG00000000758	1.28	1.49	1.48	1.03	0.8	1.05	2.25	2.77	0.7	0.77	1.59	1.05	1.43	1.87	1.74	2.29	0.73	0.75	1.79	1.24	1.41	1.97	2.5	3.14	2.96	3.06	4.36	3.83	3.43	8.76	4.7	8.38	2.88	3.09	5.5	5.82	5.16	7.24	10.33	8.72	2.25	1.87	2.5	3.63	3.07	4.08	5.16	5.77	1.62
ENSMMUG00000000759	1.65	1.4	1.21	1.33	2.28	1.72	1.35	1.36	1.06	0.87	0.69	0.95	0.67	0.68	0.79	0.69	0.97	0.94	1.03	0.94	0.63	0.72	0.75	0.58	0.97	1.15	1.39	1.05	0.91	0.74	0.98	0.59	30.62	30.97	35.95	28.01	19.15	21.78	22.01	18.37	2.74	3.99	3.66	2.89	3.41	3.22	3.69	2.87	2.97
ENSMMUG00000000760	0	0	0	0	0	0	0	0	0	0	0	0	0	0	0	0	0	0	0	0	0	0	0	0	0	0	0	0	0.11	0	0	0	0	0	0	0	0	0	0	0	0	0	0	0	0	0	0	0	0
ENSMMUG00000000761	0.53	0.45	0.33	0.62	0.46	0.61	0.42	0.57	0.65	0.52	0.49	0.68	0.59	0.43	0.37	0.7	0.5	0.45	0.29	0.68	0.58	0.5	0.15	0.67	0.65	0.56	0.4	0.48	0.24	0.56	0.33	0.7	2.06	1.95	1.12	2.74	2.21	1.83	1.77	2.4	1.33	1.71	0.94	1.46	1.33	0.99	1.09	1.18	1.61
ENSMMUG00000000763	1.82	1.97	1.09	1.26	1.12	1.08	0.83	1.52	2.91	2.45	2.04	2.33	2.63	1.49	2.09	2.72	1.56	1.55	1.6	2	1.19	1	0.96	1.34	1.61	1.43	0.66	1.21	1.14	0.78	1.38	0.96	17.76	19.25	8.86	14.79	7.96	7.2	8.4	8.58	2.02	2.22	1.51	1.26	1.02	0.91	0.92	1.08	2.53
ENSMMUG00000000764	0	0	0.04	0	0	0.02	0	0	0.06	0	0	0	0	0	0	0	0	0.02	0	0	0.02	0	0	0	0	0	0.03	0	0	0	0	0	0	0.07	0	0	0	0	0	0.07	0	0	0	0	0	0.04	0	0	0
ENSMMUG00000000765	2.06	2.44	2.73	1.74	2.85	2.39	1.86	2.65	2.22	2.8	2.31	1.83	2.28	1.66	1.77	1.76	1.53	1.8	2.39	1.56	1.97	1.58	0.98	1.46	1.86	1.88	2.03	1.7	1.77	1.55	1.94	1.37	5.7	6.31	6.11	5.65	5.1	4.86	4.77	5.03	5.98	6.71	6.29	4.41	5.77	5.03	4.57	5.02	4.6
ENSMMUG00000000766	41.47	39.44	55.67	39.7	30.32	31.92	26.84	31.37	78.62	54.82	78.01	82.09	83.85	81.99	72.84	70.2	84.75	68.19	66.19	81.31	80.69	72.42	95.25	81.48	72.79	60.33	52.32	52.32	53.72	53.16	45.19	51	75.13	74.02	63.24	78.22	86.15	91.37	82.69	75.43	150.29	121.57	111.5	129.97	117.21	114.44	94.55	107.63	111.66
ENSMMUG00000000767	4.86	4.36	4.66	5.37	4.99	5.21	4.32	4.38	4.86	4.91	6.08	5.95	5.48	6.12	5.31	5.93	3.62	3.02	3.19	4.64	3.7	4.96	5.07	3.87	4.04	4.02	3.79	4.11	3.96	6.23	4.53	4.31	14.46	16.2	12.65	14.81	13.88	17.47	15.37	14.62	10.33	9.97	8.12	9.94	8.71	10.11	8.8	9.36	8.17
ENSMMUG00000000768	4.03	3.81	3.85	2.65	2.34	3.21	2.82	3.2	5.57	4.51	6.98	5.42	6.43	6.49	5.91	5.89	3.9	3.56	4.81	4.74	3.66	4.49	5.41	3.46	3.96	3.65	2.91	2.99	2.82	3.49	4	2.62	7.68	8.93	8.29	7.21	6.55	6.18	7.88	5.69	17.33	17.82	15.05	12.41	12.08	15.82	12.94	12.83	10.73
ENSMMUG00000000769	0.23	0.13	0.22	0.14	0.11	0.12	0.1	0.14	0.1	0.12	0.22	0.14	0.14	0.19	0.2	0.22	0.15	0.13	0.19	0.18	0.12	0.22	0.24	0.19	0.16	0.17	0.13	0.2	0.16	0.27	0.15	0.16	0.4	0.39	0.25	0.33	0.26	0.2	0.24	0.21	0.3	0.2	0.38	0.25	0.33	0.44	0.27	0.27	0.26
ENSMMUG00000000771	0.03	0.02	0	0.02	0.02	0.02	0	0	0.03	0	0	0	0	0	0	0	0	0	0	0	0	0	0	0	0	0	0	0	0	0.06	0	0.02	0	0.04	0	0	0	0.02	0.02	0	0	0	0	0	0	0	0	0.01	0
ENSMMUG00000000772	0	0	0.02	0	0	0	0	0	0	0	0	0	0.02	0	0	0	0	0	0	0	0	0.02	0	0	0	0	0	0	0	0	0	0	0.02	0	0	0	0	0	0	0.02	0	0	0	0	0	0	0	0	0
ENSMMUG00000000773	0	0	0.05	0	0	0.02	0	0.02	0.01	0	0	0	0.02	0.02	0	0	0	0	0.02	0.02	0	0	0	0	0.01	0	0	0	0.01	0	0	0	0	0.02	0.03	0	0	0	0	0.02	0	0	0	0	0.04	0	0	0	0
ENSMMUG00000000774	0	0	0	0.03	0	0.01	0	0	0	0	0	0.02	0	0.06	0	0	0	0	0	0	0	0.03	0	0	0	0.02	0.02	0.02	0	0	0	0	0	0.01	0.01	0	0	0	0.03	0	0.05	0.02	0	0	0.01	0	0	0	0
ENSMMUG00000000775	0	0	0	0	0	0	0	0	0	0	0	0	0	0	0	0	0	0	0	0	0	0	0	0	0	0	0	0	0	0	0	0	2.76	3.11	2.02	2.62	2.32	2.34	2.43	2.34	2.08	2.66	2.09	2.23	2.54	1.99	1.95	2.2	1.85
ENSMMUG00000000776	3.68	3.7	7.77	8.04	7.34	6.48	4.83	6.1	7.96	8.32	10.49	9.78	11.34	9.18	8.53	8.73	6.71	5.84	7.9	9.21	9.22	7.65	8.59	9.28	5.46	4.6	4.43	3.25	3.38	3.1	3.7	3.07	0.87	1.18	0.74	0.47	0.55	0.62	0.56	0.44	43.3	51.03	46.33	43.01	39.23	47.83	38.03	38.79	22.53
ENSMMUG00000000777	13.76	13.59	13.9	15.54	19.86	21.96	31.01	23.3	10.55	13.99	10.28	11.77	10.32	12.27	10.99	12.06	9.62	9.13	13.6	10.42	10.56	12.12	11.14	11.16	12.17	12.61	13.01	12.58	13.46	14.87	17.98	14.9	9.91	8.97	14.57	10.42	9.23	8.87	9.67	10.6	10.68	12.39	12.55	13.1	12.01	15.01	14.77	13.93	10.42
ENSMMUG00000000779	38.66	36.83	42.09	43.14	36.62	36.41	30.95	38.83	47.35	36.11	53.36	52.1	54.76	55.75	57.05	50.19	37.04	31.36	33.96	46.42	39.99	40.42	53.54	39.63	35.07	32.18	34.75	39.44	42.7	41.46	39.47	39.85	45.75	47.23	38.94	49.65	51.15	63.28	55.28	52.16	59.35	52.4	49.91	60.57	57.59	60.66	62.6	61	56.3
ENSMMUG00000000780	0.03	0.01	0	0	0.01	0	0.03	0	0	0.01	0	0.03	0	0.02	0	0	0.09	0.11	0	0	0.01	0.03	0.01	0.01	0.02	0.08	0.03	0	0.03	0	0	0.03	0	0.04	0.01	0.01	0.01	0.01	0.01	0	0	0.05	0.04	0.03	0.01	0.06	0.01	0.05	0.1
ENSMMUG00000000781	0.28	0.28	0.45	0.18	0.3	0.11	0.29	0.31	0.46	0.2	0.64	0.43	0.47	0.45	0.31	0.25	0.7	0.4	0.34	0.45	0.61	0.25	0.52	0.67	0.31	0.15	0.22	0.29	0.24	0.33	0.39	0.5	0.75	0.33	0.32	0.63	0.43	0.11	0.29	0.25	0.46	0.4	0.64	0.42	0.53	0.3	0.16	0.34	0.38
ENSMMUG00000000782	0.09	0.08	0.09	0.1	0.12	0.09	0.06	0.12	0.07	0.06	0.06	0.06	0.06	0.09	0.09	0.07	0.03	0.04	0.08	0.06	0.06	0.12	0.03	0.09	0.05	0.09	0.2	0.15	0.18	0.3	0.09	0.13	0.17	0.1	0.11	0.12	0.08	0.17	0.07	0.17	0.06	0.07	0.08	0.09	0.1	0.11	0.07	0.17	0.04
ENSMMUG00000000783	0.24	0.28	0.16	0.18	0.12	0.15	0.16	0.24	0.08	0.15	0.13	0.18	0.15	0.15	0.14	0.15	0.05	0.06	0.13	0.15	0.12	0.1	0.16	0.21	0.31	0.24	1.03	0.6	0.54	0.81	0.54	0.47	0.04	0.05	0.06	0.12	0.02	0.09	0.04	0.05	0.19	0.24	0.43	0.41	0.38	0.38	0.34	0.41	0.15
ENSMMUG00000000784	0.75	0.69	0.62	0.87	0.82	0.82	0.86	0.93	0.65	0.54	0.79	0.99	0.65	0.9	0.93	0.8	0.65	0.65	0.94	0.55	0.78	0.9	0.94	0.81	0.75	0.92	0.95	0.93	0.85	0.89	0.89	1.01	1.69	1.07	1.31	1.43	1.82	1.3	1.16	2.01	0.91	0.84	1.53	1.02	1.44	1.31	1.48	0.86	0.76
ENSMMUG00000000785	0.05	0.08	0.03	0.12	0.04	0.05	0.02	0.07	0.04	0.03	0.05	0.02	0.07	0.06	0.01	0.01	0.03	0.01	0.04	0.07	0	0.07	0.02	0.1	0.08	0.05	0.05	0.05	0.01	0.06	0.03	0.04	0.08	0.16	0.13	0.17	0.1	0.16	0.26	0.14	0.08	0.06	0.08	0.1	0.12	0.08	0.13	0.07	0.12
ENSMMUG00000000786	0.87	0.82	1.14	0.98	0.71	0.85	0.77	0.76	1.06	0.68	1.76	1.18	1.34	1.3	1.67	1.07	0.41	0.49	1.09	0.7	1.25	1.26	1.02	0.48	0.68	0.58	1.23	1.18	0.92	1.46	1.13	1.31	4.87	3.38	4.78	5.22	5.3	3.89	4.52	4.44	2.67	1.7	2.96	2.8	2.94	3.44	3.17	3.06	1.52
ENSMMUG00000000787	3.19	2.88	2.89	2.64	3.39	3.29	2.68	4.03	2.86	3.2	2.76	2.64	2.89	2.77	2.71	3.43	1.96	2.29	2.96	2.64	2.87	2.51	2.13	2.74	2.7	2.53	2.33	2.05	2.01	2.04	2.2	2.65	4.06	4.05	3.39	3.91	3.67	3.27	3.37	4.69	2.31	3.36	4.51	3.81	4.14	3.65	4.07	4.41	2.45
ENSMMUG00000000788	0	0.03	0.02	0	0	0.02	0.01	0.02	0	0.02	0.03	0.01	0.02	0.04	0.01	0.03	0.01	0.01	0.06	0.01	0.01	0.07	0.01	0	0.03	0.01	0.02	0.04	0.02	0.02	0.01	0	0.28	0.23	0.3	0.25	0.19	0.35	0.24	0.28	0.03	0.04	0.05	0.12	0.12	0.04	0.03	0.01	0.02
ENSMMUG00000000789	0.97	1.08	1.33	1.05	1.28	1.27	1.1	1.01	1	1.33	1.26	0.81	1.28	0.89	1.28	1.12	0.74	0.66	1.18	0.83	0.93	1.13	0.62	0.96	0.88	0.84	0.85	0.73	0.87	1.27	1.19	0.98	4.23	4.09	3.59	3.59	4.35	4.16	4.73	5.14	3.13	3.87	4.38	4.08	4.65	3.96	4.54	4.23	2.55
ENSMMUG00000000790	7.18	7.73	7.63	7.99	9.08	10.17	9.3	10.74	9.2	11.5	9.87	10.3	9.24	11.55	12.46	11.4	6.9	5.8	7.37	8.95	6.55	8.87	8.5	8.03	6.17	7.06	5.77	6.44	6.89	7.97	9.9	7.45	26.84	28.58	30.24	29.9	25.55	26.3	27.28	28.23	27.2	32.34	28.59	27.94	24.69	31.78	29.42	30.07	20.59
ENSMMUG00000000791	8.96	9.77	9.49	9.21	8.86	8.1	10.04	9.22	8.07	7.48	10	7.83	8.99	10.43	12.98	10.23	7.94	6.79	6.69	9.08	10.14	8.85	13.72	8.27	7.32	8.41	11.95	10.22	9.67	13.74	11.69	9.73	12.8	15.35	13.25	15.81	14.17	17.1	15.64	15.36	8.59	9.87	9.78	10.05	10.99	10.49	14.56	11.17	7.85
ENSMMUG00000000792	31.14	30.46	37.91	29.69	27.58	27.42	23.87	29.36	44.3	39.73	59.07	49.81	58.58	61.18	61.92	54.65	27.97	25.48	35.08	40.29	36.33	36.18	55.7	34.65	27.67	23.97	24.52	26.51	26.59	28.86	29.29	26.96	53.73	58.7	48.04	51.54	55.38	66.72	59.25	52.03	45.63	41.81	46.98	49.81	48.6	51.15	50.13	49.45	48.16
ENSMMUG00000000793	2.12	3.38	2.93	2.95	3.88	4.08	3.25	4.26	1.45	3.05	2.11	2.45	2.4	2.17	2.5	2.72	1.37	1.63	3.01	2.53	2.03	1.87	1.82	2.27	1.58	2.67	2.65	2.56	2.17	2.58	2.73	2.82	12.87	14.15	14.23	12.91	12.09	10.65	11.94	10.91	13.09	18.89	16.32	12.75	16.31	15.25	16.6	15.24	8.8
ENSMMUG00000000795	0	0	0	0	0	0	0	0	0	0	0	0	0	0	0	0	0	0	0	0	0	0	0	0	0	0	0	0	0	0	0	0	67.43	56.72	86.23	76.51	79.97	69.25	68.75	80.11	43.36	44.13	57.97	51.32	51.38	47.18	61.22	53.4	38.59
ENSMMUG00000000796	0.99	0.86	1.18	1	1.02	1.14	1.07	0.92	1.14	0.71	1.03	0.9	1.12	0.98	1.35	1.34	0.56	0.47	0.73	0.95	0.72	0.62	0.61	0.74	0.77	0.68	1.11	0.8	0.7	0.93	0.85	0.76	1.75	2.15	2.84	2.04	2.14	1.86	2.06	2.3	1.43	1.3	1.85	1.85	2.38	1.14	1.38	1.62	1.36
ENSMMUG00000000797	0.15	0.1	0.22	0.21	0.34	0.23	0.31	0.24	0.5	0.52	0.36	0.45	0.36	0.28	0.25	0.32	0.52	0.45	0.26	0.44	0.31	0.3	0.3	0.25	0.37	0.44	0.17	0.25	0.2	0.19	0.19	0.19	26.57	24.92	20.24	25.66	22.06	21.9	20.51	25	5.56	5.55	2.97	1.98	2.8	2.11	2.52	2.39	3
ENSMMUG00000000798	4.11	4.19	8.73	3.74	3.32	3.69	3.88	4.34	2.51	2.09	7.34	3.21	3.84	5.4	4.24	4.2	3.11	3.19	7.43	3.13	4.02	5.48	5.75	3.94	3.16	3.38	15.53	4.34	5.35	6.65	4.89	5.72	6.41	5.24	26.14	6.3	8.25	9.81	9.46	9.48	3.46	2.81	7.34	2.51	3.14	9.13	3.75	3.55	3.19
ENSMMUG00000000799	0	0.15	0.1	0.15	0.21	0	0.05	0.28	0	0.2	0.19	0.09	0.09	0	0.15	0.33	0.32	0.21	0.59	0.6	0	0.06	0	0.12	0	0	0.09	0	0	0	0	0	0.29	0.65	0.55	0.37	0.26	0.24	0.4	0.91	0.11	0.09	0.32	0.07	0	0	0.04	0.48	0.36
ENSMMUG00000000800	41.37	41.9	40.23	36.69	33.26	33.69	31.35	35.78	45.88	37.15	51.73	45.46	49.63	55.02	52.85	49.46	41.35	37.18	36.83	42.98	41.23	42.42	56.04	43.49	36.2	38.89	36.98	37.15	41.75	48.65	41.45	38.92	39.36	40.75	33.8	41.57	38.12	46.87	40.27	42.49	46.85	43.01	40.45	45.34	40.75	46.32	45.76	45.55	45.5
ENSMMUG00000000801	20.12	18.98	23	18.41	13.25	12.77	11.81	14.06	21.93	15.17	25.76	22.92	21.89	23.35	23.55	23.44	21.93	17.75	21.11	23.51	21.42	20.83	24.46	23.99	23.01	19.8	22.88	20	18.67	20.91	17.4	21.19	30.31	30.61	25.32	29.38	28.17	34.13	27.79	29.48	29.45	26.27	28.35	28.65	23.31	25.29	25.75	24.4	27.7
ENSMMUG00000000802	0.49	0.55	0.74	0.75	0.91	0.99	0.47	0.46	0.39	0.31	0.4	0.36	0.48	0.36	0.4	0.27	0.21	0.29	0.22	0.35	0.22	0.21	0.33	0.2	0.22	0.42	0.59	0.62	0.53	0.33	0.64	0.34	9.59	10.12	14.16	9.92	6.98	7.58	8.82	7.52	9.38	12.95	8.35	7.06	6.53	7.43	6.72	5.81	8.85
ENSMMUG00000000803	5.59	5.04	4.95	5.93	6.2	6.88	5.09	5.08	2.65	3.05	3.31	3.17	3.93	4.29	4.2	4.16	2.57	2.33	3.08	3.16	2.96	3.9	5.14	3.21	3.12	2.99	3.7	3.64	3.77	4.59	4.47	3.73	18.79	21.31	13.01	18.52	16.87	21.08	18.64	17.01	5.3	4.26	5.11	5.37	6.76	5.88	5.92	5.79	4.04
ENSMMUG00000000805	0.07	0.07	0.08	0.07	0.03	0.09	0.04	0.11	0.06	0.06	0.08	0.06	0.02	0.04	0.05	0.07	0.05	0.1	0.05	0.06	0.05	0.06	0.02	0.08	0.06	0.09	0.06	0.03	0.05	0.03	0.03	0.03	0.13	0.07	0.16	0.1	0.11	0.11	0.1	0.11	0.11	0.05	0.13	0.07	0.05	0.15	0.05	0.04	0.04
ENSMMUG00000000806	0	0	0	0	0	0	0.11	0	0.05	0	0	0	0	0	0	0	0	0	0	0	0	0	0	0	0	0	0	0	0	0	0	0	0	0.09	0	0	0	0	0	0	0	0	0	0.03	0	0	0	0	0
ENSMMUG00000000807	6.46	6.85	6.66	7.92	6.02	6.53	6.01	7.04	5.22	4.78	8.21	8.59	7.43	9.22	8.22	9.06	4.94	5.56	7.9	7.96	7.03	8.74	8.57	8.96	4.89	5.62	5.76	6.31	4.62	8.06	6.62	7.39	9.97	11.38	9.1	12.52	12.75	15.75	12.77	14.07	8.71	9.11	9.53	12.68	10.05	10.07	11.09	10.6	6.81
ENSMMUG00000000808	0.04	0.04	0.05	0.05	0.03	0.05	0.03	0.06	0.27	0.44	0.34	0.35	0.14	0.23	0.12	0.32	0.19	0.16	0.24	0.2	0.14	0.11	0.13	0.03	0.22	0.16	0.06	0.05	0.03	0.04	0.03	0.05	0.05	0.04	0.03	0.02	0.01	0.02	0.01	0.1	0.04	0.08	0.15	0.19	0.07	0.09	0.24	0.13	0.28
ENSMMUG00000000809	0	0	0	0	0	0	0	0	0	0	0	0	0	0	0	0	0	0	0	0	0	0	0	0	0	0	0	0	0	0	0	0	46.28	32.35	37	40.41	44.55	39.99	39.49	49.57	22.69	25.04	45.77	74.02	31.2	34.39	59.89	52.35	9.47
ENSMMUG00000000810	0.76	0.78	0.75	0.76	0.33	0.34	0.31	0.57	0.57	0.27	0.8	0.72	0.76	0.79	0.55	0.68	0.99	0.79	0.6	0.89	0.49	0.97	1	0.63	0.87	0.59	0.96	0.91	0.92	0.82	0.65	0.68	1.68	1.9	1.01	1.15	1.12	1.16	1.01	1.16	1.31	0.47	0.65	0.58	0.91	0.72	0.5	0.53	1.13
ENSMMUG00000000811	3.78	2.94	4.96	2.25	1.54	1.74	2.4	2.05	12.59	4.25	13.57	11.97	17.23	9.73	11.55	12.77	7.76	3.94	9.49	5.47	7.04	7.61	7.62	8.16	7.65	6.65	8.1	4.05	4.57	5.09	4.81	5.84	2.04	2.02	2.39	1.79	1.89	2.38	1.99	2.11	12.75	5.29	6.86	7.32	10.21	7.58	6.15	6.42	4.13
ENSMMUG00000000812	7.8	6.45	9.51	9.02	11.31	10.52	9.34	10.68	7.56	9.52	9.21	8.7	8.16	7.7	9.75	8.8	6.85	6.53	8.96	7.84	8.75	7.22	6.95	7.77	5.88	6.03	7.84	6.04	7.27	6.27	6.97	7.8	6.88	5.77	9.67	6.54	7.72	7.17	7.47	8.44	7.63	10.02	11.63	8.55	10.78	7.89	12.07	10.89	7.6
ENSMMUG00000000813	0	0	0	0	0	0.01	0.02	0	0	0.01	0	0	0	0	0.05	0	0	0	0.03	0	0	0.01	0	0	0	0	0.04	0.08	0	0.04	0	0	0.1	0.04	0	0	0	0	0.04	0	0.01	0	0.02	0	0	0	0	0.01	0.02
ENSMMUG00000000815	0.01	0	0.01	0	0.01	0.01	0.01	0	0	0	0.01	0	0.01	0.02	0.02	0	0.01	0.03	0.01	0	0	0	0.01	0.02	0.01	0.01	0.01	0.01	0.01	0	0.05	0.02	0.02	0.02	0.03	0.02	0.02	0	0.01	0.01	0.03	0.04	0.05	0.06	0.06	0.08	0.18	0.14	0.02
ENSMMUG00000000816	0.07	0.31	0.37	0.19	0.29	0.27	0.2	0.31	0.05	0.13	0.24	0.06	0.05	0.07	0.28	0.05	0.17	0.03	0	0.12	0.18	0.35	0.1	0	0.04	0.09	0.39	0.06	0.41	0	0.14	0.13	0.19	0.47	0.76	0.37	0.41	0.56	0.38	0.16	0.06	0.43	0.3	0.06	0.24	0.04	0.18	0.64	0.09
ENSMMUG00000000818	0.05	0.01	0.01	0.03	0	0.01	0.01	0.03	0.02	0.02	0.04	0.01	0.02	0.02	0.01	0.01	0.03	0.01	0.04	0.05	0.02	0	0.1	0.05	0.01	0.06	0.02	0.01	0.03	0.01	0.02	0.03	0.07	0.04	0.05	0.02	0.03	0.02	0.01	0.03	0.06	0.02	0	0.04	0.02	0.01	0	0.01	0.04
ENSMMUG00000000820	0	0	0	0	0	0	0	0.01	0	0	0	0	0	0	0	0	0.01	0	0	0	0	0	0	0	0	0	0	0	0	0	0.05	0	0	0.03	0.02	0	0	0	0	0.02	0	0	0	0	0.01	0	0	0	0
ENSMMUG00000000821	0.03	0.18	0.06	0.08	0.15	0.04	0.09	0.11	0.08	0.1	0.12	0.08	0.08	0.06	0.12	0.1	0.04	0.15	0.08	0.04	0.04	0.02	0.16	0.08	0.09	0.05	0.02	0	0.1	0.04	0.06	0.11	0.07	0.06	0.07	0.03	0.05	0.04	0.05	0.06	0.01	0.19	0.05	0.05	0.05	0.15	0.06	0.05	0.03
ENSMMUG00000000822	10.78	11.69	11.76	9.99	9.61	9.21	8.2	9.47	12.57	10.52	13.55	14	12.86	12.69	14.4	12.71	10.26	9.25	9.46	11.92	10.07	9.6	12.84	9.56	10.21	9.51	9.15	9.07	9.96	9.2	9.7	9	16.34	17.57	13.46	16.69	16.81	19.16	17	15.92	14.99	14.25	15.23	14.61	14.21	14.28	16.12	14.51	14.73
ENSMMUG00000000823	1.93	1.57	2.31	1.59	1.53	1.68	1.32	1.49	1.68	1.73	1.99	1.78	1.62	1.81	2.04	2	1.18	1.47	1.92	2.03	1.48	1.38	1.44	1.78	1.53	1.76	1.8	1.15	1.09	1.61	1.38	1.17	10.23	9.07	11.21	9.92	8.05	11.52	9.51	10.33	2.31	2.61	4.08	2.9	2.53	2.56	2.57	2.69	2.44
ENSMMUG00000000824	0.33	0.36	0.32	0.11	0.23	0.2	0.17	0.19	0.59	0.45	0.55	0.48	0.67	0.46	0.71	0.78	0.28	0.24	0.45	0.32	0.56	0.46	0.3	0.47	0.31	0.13	0.27	0.11	0.2	0.23	0.13	0.14	2.75	2.83	1.47	2.5	1.74	1.85	1.33	1.81	0.5	0.48	0.87	0.7	0.99	1.49	0.87	1.1	0.72
ENSMMUG00000000825	1.3	1.36	1.43	1.18	1.62	1.41	1.29	1.41	1.36	1.58	1.54	1.76	1.6	1.63	1.47	1.47	1.87	1.16	1.27	1.61	1.9	1.67	1.78	1.38	1.23	1.26	1.23	1.4	1.54	1.88	1.47	1.57	7.18	8.78	6.19	7.79	8.22	10.87	8.18	8.57	3.47	3.62	2.68	3.31	3.43	4	3.59	3.02	3.46
ENSMMUG00000000826	1.01	0.71	0.91	0.65	1	0.93	0.72	0.7	0.54	0.5	0.87	0.69	0.77	0.75	0.87	0.68	0.42	0.63	0.82	0.45	0.8	0.71	0.85	0.6	0.84	0.62	1.13	0.49	0.83	0.8	0.9	0.83	0.52	0.3	0.42	0.42	0.64	0.5	0.89	0.75	0.53	0.36	1.32	0.71	1.02	1.24	1.63	1	0.79
ENSMMUG00000000827	2.55	2.32	3.06	2.42	2.95	2.75	2.14	2.46	2.43	2.76	2.32	2.19	2.03	1.71	2.04	1.67	2.06	1.73	2.7	1.9	1.94	1.59	1.21	1.62	2.16	2.19	2.31	1.89	1.97	1.61	2.19	1.78	2.88	3.02	3.75	2.74	3.09	2.68	2.3	3.09	1.96	2.38	2.68	2.17	1.75	2.32	1.89	2.1	2.61
ENSMMUG00000000828	1.68	1.82	2.96	1.64	1.38	1.49	2.02	2.03	1.03	1.26	2.01	1.91	1.77	1.68	1.9	1.88	1.22	1.31	2.24	1.78	1.69	1.79	1.89	2.1	3.04	3.9	5.44	4.15	3.39	4.56	3.16	4.35	3.48	3.62	3.17	2.86	3.07	2.86	3.21	3.25	6.64	8.24	6.71	7.75	7.28	7.3	9.08	8.47	4.48
ENSMMUG00000000829	33.14	31.64	38.33	33.34	35.23	35.52	36.88	37.77	33.06	34.8	32.62	31.86	32.07	29.5	34.39	32.67	24.51	25.05	32.19	29.7	29.22	27.26	27.05	28.44	25.29	29.4	33.63	28.73	29.45	31.58	34.55	32.54	24.62	24.5	30.52	24.61	23.94	22.69	23.68	28.44	25.36	33.44	38.93	34.02	34.56	37.15	42.84	36.64	29.85
ENSMMUG00000000830	66.23	57.88	57.73	52.61	35.38	36.6	41	42.32	53.09	33.55	50.29	46.37	47.47	50.81	54.23	50.69	53.77	46.38	48.49	56.75	55.54	59.25	66.41	57.43	51.22	42.71	63.98	50.51	52.02	55.95	54.37	71.86	93.68	84	71.33	71.78	78.07	81.53	86.42	78.05	81.22	70.53	91.69	80.21	82.61	83.35	86.33	79.5	80.09
ENSMMUG00000000833	62.02	55.69	54.08	54.16	49.2	45.51	46.96	50.22	68.08	60.24	73.8	64.93	69.49	75.3	75.26	61	61.08	44.03	46.26	47.83	54.14	54.15	66.67	51.51	47.81	43.41	58.49	45.95	61.29	60.19	54.98	54.1	38.41	35.02	40.12	43.03	46.34	48.23	45.91	41.71	56.22	44.27	44.09	47.4	50.21	45.12	47.92	47.39	65.65
ENSMMUG00000000834	1.3	1.62	1.67	1.89	1.78	1.86	1.43	2.15	1.55	1.79	1.59	1.6	1.69	1.48	1.25	1.23	1.44	1.3	1.81	1.08	1.25	1.15	0.73	1.45	0.73	0.9	1.47	1.05	1.17	0.52	1.66	1.78	6.09	6.06	7.06	7.24	7.1	6.31	7.63	8.68	4.58	5.02	5.66	6.46	6.87	6.25	6.9	6.7	5.27
ENSMMUG00000000835	0.03	0.03	0.01	0.04	0.04	0.01	0.08	0	0.17	0.23	0.31	0.48	0.62	0.26	0.41	0.17	0.17	0.03	0.08	0.39	0.17	0.11	0.08	0.06	0.09	0.11	0.04	0.07	0.06	0.06	0.02	0.04	0.15	0.22	0.05	0.12	0.26	0.19	0.09	0.14	0.3	0.25	0.18	0.17	0.27	0.28	0.16	0.11	0.34
ENSMMUG00000000836	0.47	0.54	0.74	0.58	1.33	1.2	0.77	1.13	0.29	0.61	0.6	0.5	0.78	0.46	0.75	1.1	0.47	0.34	0.65	0.6	0.25	0.9	0.5	0.92	0.5	0.87	0.35	0.68	0.48	0.42	0.75	1.03	1.53	1.82	2.28	2.31	1.89	3.01	2.33	4.64	1.04	1.4	1.55	1.75	1.52	0.9	2.13	2.44	1.31
ENSMMUG00000000837	0.05	0.04	0.03	0.11	0.04	0.03	0.01	0.02	0.04	0.02	0.02	0.07	0.07	0.04	0	0.07	0.04	0.1	0.03	0.01	0.04	0.07	0.01	0.01	0.02	0.04	0.01	0.03	0.09	0.08	0.01	0.01	0.9	0.51	0.37	0.57	0.25	0.52	0.38	0.4	0.02	0.08	0.03	0.07	0.05	0.06	0	0.05	0.13
ENSMMUG00000000838	2.59	2.01	2.09	1.91	1.84	1.8	2.14	1.95	6.03	6.63	4.91	5.39	4.54	4.8	4.07	3.9	5.22	4.37	3.35	3.24	3.23	3.43	3.36	2.97	4.28	3.59	2.08	2.44	2.03	2.99	2.26	1.89	1.24	1.21	1.1	1.39	1.24	1.23	1.17	1.24	6.05	5.65	3.78	4	4.15	3.71	3.21	4.01	7.63
ENSMMUG00000000839	0.07	0.05	0.05	0.09	0.02	0.04	0.05	0.04	0.02	0.03	0.06	0.04	0.04	0.07	0.05	0.06	0.08	0.05	0.04	0.02	0.02	0.05	0.05	0.04	0.03	0.06	0.04	0.02	0.04	0.03	0.07	0.12	0.04	0.08	0.06	0.07	0.04	0.06	0.05	0.07	0.04	0.09	0.07	0.06	0.11	0.08	0.05	0.08	0.04
ENSMMUG00000000841	9.23	8.16	9.43	8.36	7.17	6.32	6.2	7.22	8.68	6.56	9.93	8.91	13.02	10.41	11.96	10.9	9.2	7.31	10.25	10.02	11.87	12.08	13.41	12.41	7.38	7.79	8.95	9.94	11.14	14.08	8.35	9.75	23.25	23.64	23.72	27.22	28.9	30.59	27.99	27.59	12.09	9.91	11.3	13.03	12.87	14.05	12	11.55	11.27
ENSMMUG00000000842	1.18	1.27	0.91	1.06	1.7	1.31	1.53	1.6	2.21	1.82	2.86	2.88	2.13	4.41	2.28	3.54	2.1	1.5	2.23	2	2.48	1.61	1.81	3.16	1.4	1.65	1.31	1.18	1.37	1.35	1.59	1.72	3.08	3.54	2.45	3.18	2.69	4.59	3.1	3.87	2.9	3.02	2.32	2.43	1.52	2.68	1.93	1.53	3.15
ENSMMUG00000000843	0.86	0.92	0.64	0.78	0.82	0.68	0.83	0.93	1.06	0.98	0.96	0.91	1.42	1.12	1.34	1.38	1.17	0.77	0.66	0.57	1.13	0.61	0.92	0.97	0.8	0.87	0.67	0.63	1.11	1.09	0.85	0.94	1.39	1.23	1.15	1.24	1.61	1.66	1.26	1.62	0.99	0.98	0.8	1.03	1.18	0.92	1.01	1.26	1.05
ENSMMUG00000000844	5.35	5.56	5.82	5.28	5.99	5.52	5.31	5.51	5.67	6.38	6.11	5.71	5.49	4.98	5.55	4.96	4.6	5.37	5.54	5.36	4.14	4.03	5.55	4.89	4.61	5.09	5.24	4.4	4.41	4.55	5.42	4.71	19.93	21.08	24.5	21.41	18.05	18.34	19.74	17.99	14.27	16	15.98	14.11	13.38	14.5	14.64	12.99	10.97
ENSMMUG00000000845	0.79	0.63	1.44	0.94	0.88	0.69	0.96	0.76	4.58	3.39	5.35	7.72	6.28	6.12	6.33	5.43	3.62	2.84	5.26	6.68	5.4	7.52	6.91	6.41	2.41	1.97	1.26	0.85	0.53	0.99	1.14	0.62	69.51	65.79	68.99	64.23	78.54	78.25	74.59	83.11	5.26	3.91	5.3	6.48	4.97	5.95	4.97	5.36	4.36
ENSMMUG00000000846	0.08	0.16	0.1	0.18	0.07	0.09	0.04	0.08	0.87	1.03	1.54	1.23	1.14	1.28	1.6	1.5	0.54	1.02	0.79	1.14	1.07	0.81	1.54	0.91	0.13	0.39	0.28	0.15	0.2	0.27	0.2	0.32	14.14	19.81	16.99	17.89	18.07	17.34	19.21	12.11	0.66	0.76	1.16	1.14	1.29	1.35	1.1	1.3	1.44
ENSMMUG00000000847	0.02	0.05	0.1	0	0.03	0.03	0.01	0	0.03	0	0.05	0.04	0.08	0	0.01	0.01	0.01	0	0.02	0.06	0.01	0	0.06	0.08	0.11	0.01	0.04	0.04	0	0	0.06	0	2.47	2.59	3.06	2.89	2.04	1.98	2.72	3.68	1.12	0.9	1.58	1.68	1.04	0.97	1.15	1.64	1.02
ENSMMUG00000000849	0.06	0	0	0.03	0.03	0.06	0	0.03	0	0	0	0	0	0.07	0	0.05	0	0.03	0	0	0	0	0	0.1	0.04	0	0	0	0	0	0.06	0	0.05	0.21	0.03	0.09	0.38	0.21	0.49	0.29	0	0	0	0	0	0	0.2	0	0
ENSMMUG00000000850	90.68	84.6	94.37	55.34	73.63	56.96	66.66	87.95	145.73	134.3	119.22	99.79	125.16	106.06	93.28	113.84	140.25	121.1	92.21	104.95	116.89	100.57	100.72	111.48	93.09	117.23	99.42	63.58	66	108.08	73.74	96.58	0.13	0.04	0.16	0.1	0.38	0.46	0.14	0	86.07	90.37	62.25	56.82	63.1	54.22	32.79	48.29	173.73
ENSMMUG00000000851	0.69	0.56	0.72	0.47	0.56	0.68	0.66	0.78	0.56	0.86	0.15	0.32	0.35	0.66	0.47	0.12	0.18	0.4	0.11	0.25	0.06	0.06	0.11	0.1	0.2	0.55	0.62	0.54	0.98	0.64	0.98	0.93	0.04	0.04	0.02	0.05	0.04	0.03	0.04	0.01	0	0.01	0.01	0.01	0.02	0	0	0.01	0.45
ENSMMUG00000000853	3.55	3.49	3.57	3.28	3.55	3.22	2.94	3.09	3.19	3.96	2.95	2.88	3	2.87	3.28	2.87	2.41	2.06	2.21	2.74	2.53	1.93	2.14	2.09	2.55	2.58	2.73	2.46	2.48	2.26	2.81	2.19	4.06	4.15	3.79	4.08	3.62	3.51	3.51	4.12	4.43	6.48	4.57	4.79	4.3	4.23	5.47	4.69	5.07
ENSMMUG00000000854	10.98	10.5	12.82	10.07	9.72	9.13	9.61	9.19	11.01	8.65	12.94	10.45	13.22	12.97	13.19	11	9.5	8.9	13.4	12.3	13.98	11.69	11.59	13.17	8.23	9.32	12.31	8.53	10.57	8.14	9.24	9.23	17.93	20.01	17.38	19.35	21.66	14.07	18.2	21.81	11.14	15.01	22.22	15.05	15.9	12.56	18.11	15.24	11.82
ENSMMUG00000000856	0	0	0	0	0	0.03	0	0	0	0	0	0	0	0	0	0	0	0	0	0	0	0	0.02	0	0.04	0	0	0	0.02	0	0	0	0	0.02	0	0.02	0	0	0	0	0	0.02	0	0	0	0	0	0	0
ENSMMUG00000000857	3.36	3	4.3	3.31	2.21	3.61	3.06	4.72	2.55	1.17	4.57	3.37	4.26	5.68	6.28	8.18	2.51	2.48	4.44	3.64	4.14	5.48	6.71	6.4	3.24	2.92	6.57	4.06	3.82	8.17	4.74	8.46	3.25	2.65	2.38	3.21	2.15	2.21	2.54	4.18	3.98	2.59	5.87	6.27	4.27	4.42	6.19	8.38	4.36
ENSMMUG00000000858	1.67	1.87	1.55	1.53	1.72	1.57	1.85	1.92	1.23	1.5	1.33	1.36	1.65	1.39	1.73	1.12	1.11	1.31	1.03	1.25	1.43	1.39	1.22	1.22	1.31	1.6	1.68	1.51	1.22	0.93	1.64	1.53	5.42	5.91	5.27	6.33	5.24	5.25	5.73	5.53	4.45	4.81	4.32	4.61	4.34	4.36	4.31	4.39	3.4
ENSMMUG00000000859	3.15	3.19	3.53	3.14	2.64	2.27	2.38	2.42	3.26	3.01	4.33	4.04	4.42	4.34	4.96	4.9	2.22	2.88	3.64	3.23	3.28	3.83	4.27	3.12	2.11	2.66	2.8	3.26	2.55	4.04	3.25	2.8	2.46	3.39	3.25	3.22	3.68	4.57	3.92	3.95	3.33	3.15	2.96	3.67	4.15	3.52	3.27	3.31	3.47
ENSMMUG00000000860	1.55	1.57	1.44	2.24	2.83	2.7	1.37	1.76	2.22	2.48	1.97	2.71	2.65	2.89	2.14	1.79	2.18	2.3	1.94	2.58	2.34	2.36	2.61	3.14	2.16	2.07	1.09	0.9	1.27	1.49	1.28	1.05	3.6	3.6	4.12	5.8	7.49	6.47	6.44	5.64	5.96	5.79	5.01	5.72	6.28	5.21	5.35	6.72	3.9
ENSMMUG00000000861	2.21	3.1	2.32	2.17	2.16	1.67	1.76	1.24	2.1	2.27	2.99	2.99	4.19	3.59	3.77	2.77	2.27	2.1	1.95	2.86	3.03	2.8	3.01	3.02	2.47	2.27	3.3	1.64	1.84	2.51	1.95	2.94	2.2	2.47	1.87	2.56	1.99	2.7	2.07	3.38	3.6	2.63	2.46	3.5	2.43	2.68	1.93	2.1	2.68
ENSMMUG00000000862	3.53	6.06	4.46	2.65	2.67	4.33	1.07	2.82	20.87	11.8	6.66	8.99	10.56	8.27	7.06	7.53	15.08	13.67	4.42	5.73	5.98	5.34	6.8	4.74	10.83	19.03	8.64	4.9	6.16	7.63	5.31	9.37	4.06	3.51	2.24	2.41	4.09	4.78	3.99	3.18	18.07	18.64	13.67	12.53	15.86	15.88	10.89	10.28	15.82
ENSMMUG00000000863	11.02	10.68	7.88	11.71	14.27	13.64	12.51	12.94	5.83	7.82	3.79	3.27	4.16	3.05	3.91	3.9	5.45	6.66	3.66	4.23	3.97	3.35	2.09	3.21	6.57	7.59	6.66	8.79	8.82	6.99	8.9	8.47	2.63	2.07	2.01	2.84	1.85	1.75	1.34	1.24	3.78	3.93	1.82	4.18	4.96	3.03	3.47	3.2	4.87
ENSMMUG00000000864	0.05	0.08	0.02	0.03	0.05	0.09	0.01	0.21	0.18	0.17	0.05	0.14	0.09	0.06	0.07	0.08	0.13	0.11	0.12	0.13	0.1	0.02	0	0.09	0.16	0.26	0.1	0.08	0.03	0.05	0.09	0.16	0.09	0.06	0.07	0.09	0.01	0.04	0.08	0.11	0.09	0.18	0.04	0.03	0.04	0.07	0.14	0.09	0.06
ENSMMUG00000000866	7.79	8.3	8.47	7.79	6.16	6.8	5.88	7.2	9.25	8.45	9.84	9.31	9.44	10.16	9.29	9.61	8.18	6.53	8.13	7.59	6.78	7.9	9.48	9.04	7.77	8.21	7.53	8.29	7.48	12.55	9.26	8.12	47.48	48.34	49.21	51.98	45.05	51.25	47.68	54.09	33.82	40.85	32.68	34.77	30.45	38.46	32.47	38.09	27.98
ENSMMUG00000000868	2.18	1.89	2.51	2.08	1.89	1.69	1.57	1.67	3.03	2.08	2.46	2.42	2.98	1.99	2.61	2.51	2.37	1.5	2.7	2.69	2.19	2.36	2.28	1.74	2.74	2.4	2	1.94	1.86	2.48	2.1	1.73	1.61	1.53	1.4	1.46	1.7	1.38	1.35	1.92	3.02	3.79	3.92	3.14	2.65	2.75	3.54	3.44	2.99
ENSMMUG00000000869	0	0	0	0	0	0	0	0	0	0	0	0	0	0	0	0	0	0	0	0	0	0	0	0	0	0	0	0	0	0	0	0	34.49	44.41	38.87	36.66	42.43	44.2	35.66	39.36	33.06	35.28	35.74	34.69	35.57	40.95	39.65	32.93	33.76
ENSMMUG00000000870	0.12	0.2	0.23	0.2	0.21	0.08	0.07	0.13	0.1	0.09	0.17	0.15	0.17	0.08	0.11	0.09	0.05	0.11	0.19	0.11	0.16	0.12	0.12	0.03	0.19	0.16	0.16	0.12	0.23	0.04	0.13	0.15	0.09	0.04	0.09	0.18	0.09	0.04	0.2	0.09	0.16	0.09	0.16	0.1	0.35	0.11	0.18	0.18	0.14
ENSMMUG00000000871	4.66	4.9	5.16	5.05	4.38	4.72	4.62	5.06	4.38	4.33	4.98	4.8	4.93	5.22	4.81	4.72	4.22	3.81	3.81	4.57	4.6	4.78	6.08	4.6	5.57	5.91	5.93	6.49	8.03	8.64	7.25	8.19	6.42	7.04	6.28	9.03	7.96	8.88	8.19	8.33	7.31	7.16	6.15	8.37	6.87	6.49	8.03	7.68	6.48
ENSMMUG00000000872	0.05	0.06	0.02	0.02	0.03	0	0.01	0.04	0.04	0.09	0.07	0.02	0.04	0.05	0.01	0.04	0.01	0.05	0.03	0.02	0.08	0	0	0.02	0.03	0.04	0.13	0.04	0.13	0.09	0.05	0.04	0.08	0.02	0.02	0.03	0.02	0.02	0	0.03	0.1	0.02	0.03	0.02	0.05	0	0	0.01	0.08
ENSMMUG00000000873	27.28	25.57	29.77	24.64	24.24	24.13	21.15	23.58	24.75	24.62	27.28	26.76	25.69	22.6	30.46	24.23	22.46	22.89	25.25	24.04	20.07	18.29	20.76	23.17	22.09	21.17	23.08	18.03	18.33	17.73	22.88	17.81	25.59	23.03	25.51	24.04	26.17	18.35	22.19	27.38	21.94	30.83	29.59	30.7	27.94	24.46	29.13	23.93	26.97
ENSMMUG00000000874	32.71	34.12	30.77	36.59	37.84	39.94	36.51	39.86	20.43	20.58	24.92	24.3	21.98	26.18	26.4	23.67	19.52	18.58	21.77	23.79	20.05	21.94	25.49	16.04	16.35	15.53	21.71	24.58	28.95	27.62	28.91	24.98	4.05	3.71	5.8	5.25	5.26	4.47	8.86	5.18	38.24	34.83	35.08	30.1	33.46	38.81	33.73	29.91	41.98
ENSMMUG00000000875	0.02	0	0.03	0.02	0.04	0.02	0.01	0.01	0.01	0.02	0.02	0.01	0.02	0.03	0.02	0.01	0.01	0.01	0.01	0.03	0.02	0.02	0.02	0	0.01	0	0.02	0.03	0.01	0.02	0.01	0.03	0.05	0.08	0.03	0.04	0.04	0.01	0.07	0.02	0.05	0.11	0.08	0.05	0.05	0.1	0.07	0.02	0.06
ENSMMUG00000000876	0.04	0	0	0	0	0	0.07	0	0.05	0	0	0	0	0	0.05	0	0	0	0.24	0.03	0	0.15	0	0.42	0	0.14	0	0.18	0.05	0	0.43	0	0	0.04	0.13	0	0	0.35	0	0.11	0	0.07	0	0	0	0.04	0.04	0	0
ENSMMUG00000000877	0.08	0	0.05	0.02	0	0	0	0	0	0	0	0.04	0	0.06	0	0	0.05	0	0.13	0	0	0	0.05	0	0.03	0	0	0	0	0.14	0	0	0.09	0	0.1	0.15	0	0.2	0	0	0	0	0	0.28	0.08	0.08	0	0.09	0.21
ENSMMUG00000000878	26.03	27.26	28.94	27.31	25.74	23.2	20.31	23.36	20.17	19.19	20.78	20.33	22.03	17.79	20.78	20.68	20.92	16.98	22.85	23.86	22.4	18.66	22.54	22.47	19.84	20.83	25.65	24.33	23.72	20.73	21.29	28.51	54.48	55.58	53.95	56.64	54.62	47.86	52.8	55.24	27.22	26.91	30.11	31.37	26.15	24.28	29.05	27.56	30.02
ENSMMUG00000000879	0	0	0	0	0	0	0	0	0.06	0	0	0	0	0	0	0.03	0	0	0	0	0.1	0.05	0	0	0	0	0	0	0	0	0	0	0.04	0	0	0.03	0	0	0	0	0	0.02	0	0	0	0	0	0	0
ENSMMUG00000000880	1.01	0.77	2.14	1.24	0.94	0.64	0.95	0.97	0.78	0.45	2.08	1.46	1.38	1.24	1.63	1.51	0.54	0.32	1.3	1.55	0.56	0.61	0.82	0.75	0.92	0.78	3.18	1.47	1.05	1.56	1.45	2.3	0.93	0.73	2.24	1.17	0.97	0.93	0.7	1.27	1.4	0.86	2.4	1.8	2.02	2.02	2.07	1.81	0.71
ENSMMUG00000000881	19.25	17.76	22.63	21.18	17.62	20.97	15.87	21.12	15	11.6	16.65	17.99	16.46	15.43	19.34	19.06	10.21	10.72	14.51	14.15	12.11	12.06	12.68	15.99	17.1	14.98	20.18	17.98	14.55	17.74	17.47	20.12	23.97	24.14	28.65	24.84	23.35	25.6	26.07	31.67	14.27	17.25	25.7	25.5	21.87	19.4	26.06	25.57	15.54
ENSMMUG00000000882	0.33	0.61	0.79	0.29	0.19	0.27	0.42	0.16	1.08	1.58	2.22	1.4	2.25	1.58	1.6	1.2	0.86	0.78	1.96	1.27	1.63	1.36	1.54	1.82	1.04	1.01	1.64	1.19	1.42	1.15	0.89	1.16	0.36	0.13	1.65	0.56	1.43	1.32	0.96	0.67	4.02	3.77	8.98	6.86	6.37	6.23	5.51	6.04	3.64
ENSMMUG00000000884	0.38	0.16	0.27	0.28	0.11	0.06	0.16	0.09	0.96	1.46	0.99	1.09	0.75	0.84	0.99	0.53	1.49	1.52	1.08	1.19	0.61	0.6	1.1	0.89	0.63	0.63	0.52	0.26	0.23	0.62	0.49	0.23	3.83	4.95	4.26	4.74	5.01	4.05	5.77	5.38	55.61	78.12	57	49.61	50.95	58.09	44.52	58.6	27.38
ENSMMUG00000000885	9.38	10.34	10.09	9.94	12.34	11.83	12.03	10.88	9.73	10.56	12.55	10.48	10.14	12.55	12.93	12.35	9.29	8.1	8.97	8.83	8.63	8.76	12.11	10.18	9.32	9.1	13.6	10.06	10.01	15.66	14.67	13.02	11.34	13.07	12.69	11.93	12.74	14.68	12.52	12.78	11.62	10.31	11.69	10.72	11.81	13.04	13.85	12.69	11.18
ENSMMUG00000000886	16.22	15.58	16.22	17.06	15.63	13.69	13.68	13.52	13.77	11.03	21.37	17.57	17.1	18.52	19.98	18.13	13.39	13.5	18.09	17.02	16.07	15.03	20.21	18.88	12.77	13.33	17.21	12.02	13.34	12.15	14.75	15.67	25.46	29.52	30.91	30.87	39.85	38.2	37.83	40.95	28.03	28.03	36.53	32.12	40.55	37.98	41.99	37.07	19.37
ENSMMUG00000000887	1.78	2.05	2.14	1.98	1.12	1.15	1.49	1.5	1.83	1.31	2.16	1.97	1.57	1.56	2.03	1.73	2.12	2.49	2.38	2.14	2.1	2.07	2.99	2.72	1.99	2.35	2.3	2.11	1.81	1.62	1.92	1.93	2.03	2.12	2.09	2.12	2.13	2.28	2.85	2.48	3.44	3.11	3.8	2.75	3.04	2.24	4.76	3.68	3.24
ENSMMUG00000000889	0.13	0.04	0	0	0	0	0	0	0.06	0.05	0	0	0	0	0	0	0.13	0	0	0	0	0	0	0	0	0	0	0	0	0	0	0	0	0.05	0.05	0	0	0	0	0	0	0	0	0	0	0	0	0	0
ENSMMUG00000000890	0	0	0	0.01	0	0.01	0.01	0	0	0	0	0	0.02	0	0.08	0	0	0	0.01	0.01	0	0.01	0.06	0	0	0	0.04	0.04	0	0.02	0	0	0.04	0.07	0.01	0.05	0	0	0.04	0	0.02	0	0	0	0.02	0.04	0	0	0.03
ENSMMUG00000000891	0	0	0	0	0	0	0	0	0	0	0	0	0	0	0	0	0	0	0	0	0	0	0	0	0	0	0	0	0	0	0	0	0.91	0.6	1.26	1.04	0.9	0.55	1.06	0.84	1.07	0.85	0.76	0.98	0.96	0.93	0.94	1.05	0.57
ENSMMUG00000000892	2.46	2.85	3.07	2.33	2.53	2.08	1.63	2.13	5.7	4.21	3.56	3.93	3.07	3.66	3.23	2.59	4.64	3.81	2.5	3.28	2.5	2.85	2.48	2.39	4.17	3.25	2.37	1.95	2.71	2.54	3.01	1.68	8.82	7.93	5.79	5.83	2.62	3.41	3.43	2.38	48.78	59	31.45	32.23	27.59	39.41	26.92	34.07	25.99
ENSMMUG00000000893	4.79	4.51	4.98	4.97	5.45	5.86	4.79	4.84	5.36	5.55	6.37	5.72	5.38	5.2	5.39	5.81	5.47	5.21	4.59	4.75	4.53	5.51	6.29	5.34	5.82	5.59	5.57	5.08	5.47	5.03	5.59	5.13	10.88	12.35	11.77	12.39	11.5	11.55	11.43	12.43	9.36	8.47	8.79	8.1	8.31	8.5	8.8	9.14	6.61
ENSMMUG00000000894	1.31	0.93	1.08	1.05	1.36	1.2	1.33	1.38	1.39	1.4	0.74	1.12	0.95	0.81	0.89	1.04	1.38	1.11	0.9	1.06	0.95	0.92	0.84	1.11	1.19	1.12	1.21	1	0.82	0.96	1.38	0.84	1.52	1.24	1.43	1.53	1.55	1.22	1.39	1.64	0.99	1.22	1.1	0.99	1.32	1.14	1.57	1.37	0.95
ENSMMUG00000000895	2.07	1.98	1.99	2.21	1.74	1.91	1.66	1.82	1.72	1.5	2.32	1.78	2.04	2.34	2.03	2.02	1.83	1.92	1.39	1.76	1.64	2.36	2.95	2.03	2	1.71	2.26	1.64	2.22	2.81	2.38	1.99	1.85	2.04	2.01	2.36	2.12	2.5	2.06	2.21	2.81	1.84	2.1	2.36	2.49	2.32	2.05	1.91	2.03
ENSMMUG00000000896	0.23	0.62	0.42	0.31	0.34	0.23	0.57	0.44	0.73	0.83	1.16	1.09	1.53	1.17	1.38	1.43	0.66	0.64	0.8	0.76	1.44	1	1.57	0.73	0.5	0.56	0.42	0.33	0.62	0.38	0.54	0.31	0.74	0.63	0.67	0.81	0.65	0.5	0.59	0.5	0.93	0.8	0.68	0.57	1.21	0.78	0.71	1.12	0.84
ENSMMUG00000000897	0.03	0.02	0	0.03	0.02	0.02	0.01	0.02	0	0.01	0.01	0.01	0.01	0.03	0.06	0.01	0.01	0	0.02	0.01	0.01	0	0	0.04	0.03	0	0.01	0	0.01	0.03	0.02	0	0.75	0.35	0.23	0.34	0.18	0.16	0.11	0.2	0.09	0.08	0.04	0.07	0.1	0.11	0.09	0.04	0.07
ENSMMUG00000000898	11.1	10.15	11.62	13.33	15.63	16.68	12.06	14.96	11.37	15.87	12.38	13.97	13.47	14.05	13.28	14.43	9	9.82	12.01	11.74	10.61	11.23	10.28	11.74	9.32	10.91	11.46	11.69	11.99	10.75	11.63	11.48	14.33	16.36	19.98	19.81	15.78	15.64	16.97	17.88	12.32	15.59	16.01	16.68	16.48	16.04	17.33	16.66	11.13
ENSMMUG00000000899	3.44	3.18	3.49	3.66	3.89	4.45	2.92	4.06	2.68	2.54	3.39	3.12	4.11	4.8	3.57	4.65	2.2	1.63	2.5	2.97	2.61	3	3.22	2.93	1.93	2.07	2.27	2.37	2.96	3.67	3.08	3.31	10.35	11.56	9.28	10.83	12.75	15.96	11.3	13.59	7.89	8.26	8.11	7.84	8.55	10.16	8.04	10.7	8.77
ENSMMUG00000000900	0.67	1.07	0.9	0.82	0.47	0.4	0.62	0.98	0.7	0.8	0.92	1.14	0.78	0.94	1.08	0.84	0.63	0.51	0.61	1.12	0.43	0.46	0.98	0.69	0.7	0.91	1.37	1.21	0.83	0.83	1.25	0.96	0.44	0.74	0.74	0.72	0.51	0.66	0.59	0.61	0.79	0.85	1.14	1.34	0.74	0.61	1.64	1.06	0.85
ENSMMUG00000000901	0	0	0	0	0	0	0	0	0	0	0	0	0	0	0	0	0	0	0	0	0	0	0	0	0	0	0	0	0	0	0	0	0	0.05	0	0.03	0	0.06	0.12	0	0.06	0	0	0.02	0.06	0.04	0	0.02	0
ENSMMUG00000000902	0.04	0.05	0.3	0.1	0.01	0.02	0.05	0.03	0.13	0.09	0.57	0.19	0.17	0.22	0.24	0.23	0.14	0.04	0.57	0.22	0.1	0.14	0.35	0.02	0.09	0.09	0.49	0.07	0.03	0.06	0.07	0.01	0.1	0.24	0.74	0.4	0.11	0.36	0.18	0.26	0.25	0.2	0.8	0.12	0.21	0.22	0.23	0.1	0.15
ENSMMUG00000000903	0.27	0.15	0.83	0.26	0.36	0.35	0.75	0.66	0.31	0.08	0.52	0.39	0.43	0.45	0.49	0.46	0.21	0.08	0.37	0.36	0.51	0.47	0.55	0.44	0.33	0.15	0.34	0.5	0.58	0.82	0.92	1.11	0.29	0.25	0.22	0.27	0.3	0.31	0.21	0.3	0.34	0.13	0.28	0.3	0.43	0.44	0.48	0.35	0.59
ENSMMUG00000000905	0.11	0.17	0.32	0.11	0.18	0.2	0.1	0.08	0.28	0.17	0.39	0.14	0.54	0.25	0.29	0.3	0.16	0.18	0.3	0.16	0.27	0.49	0.04	0.11	0.07	0.13	0.53	0.35	0.41	0.37	0.23	0.18	0.9	0.65	1.55	0.49	1.2	1.29	0.42	0.87	0.34	0.24	0.91	0.19	0.88	0.64	0.12	0.24	0.34
ENSMMUG00000000906	88.1	79.61	83.27	83.7	59.41	55.57	57.05	66.15	85.44	56.5	85.51	83.9	83.27	83.44	96.58	90.45	88.18	70.31	76.91	88.02	82.94	85.75	94.74	116.77	76.26	74.8	102.98	70.17	67.49	106.55	85.33	107.7	127.02	137.13	118.54	139.71	130.52	131.38	144.7	159.38	94.26	88.41	108.57	119.68	89.35	93.41	127.81	107.05	71.01
ENSMMUG00000000907	0.94	0.99	0.67	0.88	1.5	0.82	1.16	1.18	0.47	1.33	1.06	0.86	1.11	0.75	0.71	0.87	0.62	0.76	1	0.54	0.79	0.56	0.18	0.67	0.72	1.08	1.13	0.94	0.92	0.84	0.92	0.73	0.9	1.51	1.99	1.31	1.22	0.99	0.69	1.29	2.1	4.24	4.35	4.17	4.05	3.35	2.52	3.27	2.05
ENSMMUG00000000908	42.12	44.63	44.38	38.7	30.92	27.61	28.79	31.28	38.79	25.04	41.7	38.74	42.5	40.35	39.28	36.77	44.55	36.57	40.81	45.83	42.95	33.66	51.14	40.01	38.64	39.21	48.02	44.36	42.56	57.04	44.72	51.29	52.85	56.3	46.49	53.23	54.28	50.94	52.86	50.32	52.13	52.25	53.57	53.61	49.49	49.3	55.96	46.7	46.94
ENSMMUG00000000911	0.01	0	0.01	0	0	0.04	0	0.01	0.03	0.03	0.02	0.01	0.07	0.04	0.01	0.02	0.02	0	0.02	0.01	0.01	0.02	0.05	0.02	0.02	0	0.08	0.05	0.05	0.12	0.04	0.01	0.07	0.02	0.05	0.04	0.03	0.02	0	0.02	0.02	0.01	0.03	0.03	0	0.02	0.01	0.01	0.02
ENSMMUG00000000912	1.78	1.85	2.92	0.88	1.05	1.14	1.38	1.29	1.87	1.09	2.4	1.22	1.29	1.36	1.43	1.33	1.9	1.93	2.14	1.64	1.53	1.78	1.67	0.78	1.81	1.98	2.57	1.41	1.72	1.7	1.64	2.68	0.73	0.82	1.33	0.84	0.92	1.09	0.84	1.03	2.02	1.17	2.37	1.15	1.29	1.56	1.4	1.41	1.96
ENSMMUG00000000913	0.01	0.04	0.01	0.02	0.02	0	0.03	0.01	0	0.01	0.03	0	0	0.04	0.02	0	0.01	0.02	0	0	0.02	0.02	0	0.01	0	0.05	0.03	0	0	0.05	0	0	0.27	0.23	0.22	0.16	0.09	0.29	0.53	0.49	0.01	0.03	0	0.05	0.02	0.04	0.02	0.09	0.17
ENSMMUG00000000914	15.2	14.6	14.98	15.72	16.52	16.02	9.74	13.23	22.99	20.04	16.42	20.38	14.71	13.4	17	14.75	14.31	13	11.89	15.97	12.38	9.09	7.23	9.87	15.2	12.15	11.24	9.86	10.69	8.29	12.03	9.35	65.86	68.2	52.15	49.43	51.93	40.51	40.94	54.83	29.28	34.3	19.54	18.73	21.45	14.16	20.04	17.28	27.25
ENSMMUG00000000915	0.38	0.36	0.22	0.4	0.53	0.47	0.41	0.47	0.27	0.31	0.15	0.24	0.12	0.07	0.07	0.09	0.17	0.26	0.24	0.16	0.09	0.18	0.16	0.23	0.28	0.2	0.39	0.29	0.2	0.34	0.36	0.22	0.5	0.76	0.81	0.46	0.46	0.51	0.53	0.36	1.33	1.9	1.46	1.07	1.12	1.42	0.79	1.12	2.49
ENSMMUG00000000916	1.38	1.4	1.27	1.39	1.18	1.14	1.03	1.05	1.41	1.33	1.37	1.67	1.27	1.41	1.35	1.37	1.56	1.52	1.07	1.35	1.16	1.02	1.5	1.29	1.57	1.53	1.47	1.19	1.3	1.48	1.74	1.36	3.72	3.16	2.96	3.51	3.17	3.18	3.19	3.56	3.34	2.9	2.47	3.16	3.26	2.46	2.59	2.57	2.08
ENSMMUG00000000917	6.24	5.44	6.26	5.82	5.22	4.86	4.58	5.3	6.52	4.21	7.8	6.84	7.7	7.87	7.63	6.94	5.79	4.12	6.27	7.51	7.47	6.19	9.13	6.87	5.67	4.47	6.75	7.33	7.43	8.32	6.88	8.15	11.98	10.89	10.39	14	12.77	14.42	16.13	13.1	8.57	5.65	8.04	8.93	8.43	9.13	8.51	8.2	8.4
ENSMMUG00000000918	23	23.6	23.63	21.3	22.23	20.96	18.39	22.32	26.68	29.77	28.9	25.18	25.75	25.29	26.34	25.52	22.87	20.7	21.59	22.88	22.97	20.44	25.77	25.43	18.09	17.19	19.82	15.79	21.19	16.77	19.56	17.38	28.34	31.1	25.79	28.86	31.61	33.75	26.15	29.43	22.71	24.6	22.43	23.12	20.21	21.86	19.56	25.32	28.12
ENSMMUG00000000921	0	0	0	0	0	0.02	0	0.02	0	0	0	0	0	0.04	0.03	0.03	0	0.04	0	0	0	0	0	0	0.12	0	0	0.03	0.09	0.04	0	0	0.1	0	0	0	0	0	0	0	0	0	0	0.03	0	0	0	0	0
ENSMMUG00000000923	0	0	0	0	0	0	0	0	0	0	0	0	0	0	0	0	0	0	0	0	0	0	0	0	0	0	0	0	0	0	0	0	0	0.01	0.03	0	0.02	0	0	0	0	0	0	0	0	0	0	0	0
ENSMMUG00000000924	0.06	0.02	0.03	0.04	0.03	0.03	0.02	0.08	0.04	0.02	0.03	0.02	0.04	0.02	0.03	0.03	0.06	0.03	0.06	0.04	0	0.05	0.02	0.07	0.03	0.03	0.05	0.15	0.04	0.04	0.04	0.01	0.07	0.05	0.07	0.06	0.05	0.05	0.05	0.03	0.06	0.06	0.02	0.01	0.01	0.02	0.04	0.02	0.06
ENSMMUG00000000925	0	0.01	0	0	0	0	0	0.01	0	0	0	0	0	0	0.03	0	0	0	0.01	0.01	0.02	0	0.04	0	0.01	0	0.02	0	0.02	0.02	0	0.04	0	0.03	0	0	0	0.02	0	0.02	0	0	0	0.01	0	0	0	0.03	0
ENSMMUG00000000926	0.01	0.03	0.01	0.02	0.02	0.05	0.02	0.06	0.02	0.02	0	0.03	0.03	0.01	0.02	0.01	0.04	0.02	0.01	0.06	0.05	0.01	0.01	0.01	0.01	0.04	0.02	0.06	0.05	0	0.02	0.08	0.07	0.04	0.07	0.05	0.03	0.04	0.05	0.03	0.03	0.01	0.03	0.01	0.03	0.03	0.03	0.01	0.02
ENSMMUG00000000927	0.43	0.39	0.42	0.41	0.39	0.3	0.23	0.45	0.37	0.53	0.42	0.39	0.46	0.44	0.45	0.49	0.16	0.34	0.15	0.41	0.49	0.3	0.32	0.48	0.53	0.39	0.59	0.59	0.57	0.54	0.42	0.49	0.62	0.83	0.45	0.93	0.47	0.54	0.51	0.66	0.39	0.66	0.76	0.47	0.49	0.6	0.65	0.59	0.56
ENSMMUG00000000928	0.09	0.1	0.15	0.06	0.07	0.16	0.11	0.03	0.11	0.07	0.11	0.14	0.06	0.11	0.01	0.07	0.08	0.1	0.07	0.02	0.03	0.06	0.05	0.1	0.12	0.07	0.07	0.09	0.04	0.05	0.05	0.11	0.1	0.08	0.12	0.05	0.08	0.09	0.09	0.08	0.02	0.06	0.12	0.08	0.1	0.05	0.1	0.1	0.05
ENSMMUG00000000929	0.36	0.22	0.61	0.59	0.21	0.41	0.98	0.38	0.27	0.15	0.56	0.9	0.1	1.32	1.72	0.36	0.37	0.34	0.63	0.66	0.16	0.37	1.73	0.22	0.42	0.39	0.61	1.12	0.15	1.36	1.37	1.07	0.94	0.96	1.07	1.51	0.49	1.61	1.17	0.78	0.63	0.39	1.26	1.16	0.22	1.63	2.62	0.76	0.58
ENSMMUG00000000930	0.24	0.28	0.31	0.16	0.15	0.15	0.23	0.25	0.28	0.35	0.31	0.22	0.06	0.04	0.24	0.12	0.2	0.14	0.12	0.23	0.1	0.1	0.09	0.06	0.07	0.24	0.19	0.07	0.09	0.16	0.06	0.12	0.12	0.09	0.12	0.17	0	0.13	0.12	0.12	0.03	0.11	0.08	0.11	0	0.08	0.06	0.23	0.06
ENSMMUG00000000931	1.49	1.95	1.62	1.62	1.82	1.63	1.39	1.64	1.13	1.24	1.18	1.31	1.22	1.08	1.35	1.13	0.98	1.17	1.34	1.36	1.36	0.86	0.91	1.07	1.4	1.45	1.4	1.08	1.48	1.24	1.25	1.14	2.67	3.07	3.13	2.7	2.99	2.79	2.74	3.26	2.15	2.48	2.61	2.38	2.94	2.76	2.87	2.52	1.75
ENSMMUG00000000932	0.95	0.9	1.3	1.01	1.12	0.96	1	1.03	0.9	0.83	0.86	1.07	0.91	0.66	0.99	0.98	0.63	0.54	0.82	0.81	0.68	0.79	0.88	1.01	1.17	1.24	1.54	1.36	1.27	1.41	1.12	1.55	1	1.03	0.97	1.08	1.05	0.76	1.32	0.96	2.33	2.23	2.27	2.85	2.73	2.91	3.85	2.46	2.06
ENSMMUG00000000933	5.22	5.32	6.09	5.49	5.55	5.64	5.07	5.01	4.03	4.83	5.98	4.63	4.91	4.35	4.75	4.96	4.73	4.59	6.05	4.23	5.11	4.77	4.92	5.58	4.99	5.02	5.67	4.28	4.46	4.86	5.01	4.56	9.79	10.11	11.56	9.31	10.33	10.84	9.46	11.22	6.49	7.72	8.9	6.51	7.38	8.08	6.99	7.99	5.37
ENSMMUG00000000934	0.18	0.09	0.09	0.14	0.15	0.04	0.07	0	0.24	0.2	0.23	0.22	0.44	0.5	0.71	0.39	0.76	0.11	0.17	0.12	0.25	0.15	0.05	0.25	0.06	0.21	0.05	0.05	0.15	0.24	0.18	0.14	0.73	0.33	0.56	0.35	0.55	0.54	0.21	0.63	0.59	0.53	0.46	0.49	0.44	0.19	0.66	0.23	0.88
ENSMMUG00000000935	8.98	8.61	9.75	8.7	5.95	8.11	11.65	11.07	7.79	6.88	11	10.96	7.32	11.77	19.37	16.55	6.41	6.42	8.46	9.32	8.04	9.92	16.66	13.37	8.67	8.67	10.17	9.32	6.81	10.67	17.18	19.96	16.41	19.04	18.39	19.82	17.95	23.17	27.14	24.43	10.53	10.34	14.17	13.44	9.87	14.14	22.13	18.2	9.59
ENSMMUG00000000937	0.24	0.22	0.17	0.19	0.33	0.23	0.25	0.22	0.31	0.31	0.22	0.32	0.19	0.21	0.53	0.38	0.37	0.22	0.32	0.18	0.19	0.19	0.21	0.26	0.4	0.3	0.15	0.25	0.18	0.5	0.26	0.15	1.52	1.08	0.73	0.88	1.04	1.17	1.46	0.63	0.84	0.79	0.55	0.67	0.72	0.59	0.92	0.71	0.95
ENSMMUG00000000938	14.91	12.69	13.45	16	18.18	18.11	11.64	16.81	10.72	9.57	9.67	9.4	8.11	7.76	7.82	8.88	8.16	8.25	8.83	10.2	9.12	7.47	9.23	8.02	8.63	7.52	8.91	9.31	8.68	7.7	10.21	9.45	12.98	9.4	14.18	11.01	9.91	10.86	9.1	9.64	10.41	8.55	9.87	9.11	8.54	8.37	9.4	11.36	17.91
ENSMMUG00000000940	0.01	0.02	0.01	0.02	0	0.01	0	0.04	0	0.02	0	0	0	0.05	0	0.04	0	0	0	0	0	0	0	0	0.06	0	0.02	0.09	0.02	0.02	0	0	0	0	0.05	0.02	0.02	0	0	0.06	0.05	0.04	0.15	0	0	0.07	0	0	0
ENSMMUG00000000943	2.66	2.74	2.44	2.84	2.57	2.26	2.13	2.31	2.7	1.82	2.95	2.85	2.47	2.46	2.81	3	1.7	1.68	2.16	3.04	1.9	2.27	2.15	1.39	2.34	2.07	2.91	2.55	2.66	3.32	2.83	2.02	4.08	4.74	3.73	4.37	4.38	4.06	4.6	4.24	3.2	2.78	2.63	3.38	3.22	3.08	3.98	3.56	2.78
ENSMMUG00000000945	11	11.2	11.5	10.57	9.3	9.14	7.68	9.69	9.8	8.29	10.54	9.96	10.31	12	11.86	11.77	8.5	7.46	9.82	10.92	8.45	9.26	10.98	9.34	8.88	8.74	9.98	9.11	7.56	9.83	9.32	10.68	17.16	16.75	14.93	17.68	16.9	18.05	15.23	16.23	13.73	13.05	13.75	16.31	14.12	17.3	14.19	15.09	13.05
ENSMMUG00000000946	0.44	0.38	0.7	0.42	0.27	0.37	0.28	0.42	0.23	0.14	0.32	0.34	0.13	0.22	0.16	0.28	0.39	0.3	0.61	0.51	0.48	0.52	0.53	0.53	1.97	1.78	2.25	1.45	0.83	2.23	1.15	1.87	0.89	0.95	1.27	0.9	1.11	1.25	1.21	1.29	1.04	1.18	1.58	1.14	1.69	1.52	1.61	1.73	1.02
ENSMMUG00000000947	0.95	0.69	1.12	1.32	0.81	0.99	1.09	0.96	0.28	0.39	0.8	0.58	0.35	0.46	0.43	0.64	0.53	0.35	0.85	0.4	0.58	0.62	0.84	0.77	0.66	0.67	1.1	1	1	0.73	1.33	0.83	0.13	0.14	0.12	0.06	0.13	0.07	0.07	0.17	1.78	2.69	3.71	4.6	4.12	1.94	2.88	3.89	0.42
ENSMMUG00000000948	7.44	7.35	8.74	8.07	8.13	8.04	10.56	9.69	20.33	12.04	12.59	12.94	13.72	10.94	16.04	17.69	14.31	15.84	21.36	16.72	19.16	15.55	10	15.29	13.54	14.46	10.35	8.64	8.86	10.49	10.83	11.5	8.95	8.86	9.88	9.16	9.32	6.53	9.26	12.71	19.54	14.41	18.34	11.01	18.66	13.39	13.49	16.01	20.22
ENSMMUG00000000949	6.84	6.6	9.8	6.15	5.13	6.03	5.45	6.26	12.81	10.88	12.14	11.91	9.67	11.55	10.73	10.51	9.06	7.4	11.42	10.13	7.87	9.09	10.14	9.63	9.44	8.73	8.49	7.24	6.04	6.39	5.99	7.85	104	93.6	90.32	85.29	67.23	65.93	63.61	58.17	109.08	134.73	98.15	94.29	84.59	100.45	85.22	84.33	72.35
ENSMMUG00000000950	18.19	19.35	22.53	18.73	14.47	14.45	15.01	14.02	15.57	8.95	17.56	15.02	15.75	14.17	16.9	16.28	10.46	12.53	12.97	16.87	13.18	10.34	14.88	10.8	13.83	15.54	28.72	22.71	23.76	23.68	21.95	21.73	22.52	20.71	20.58	22.9	16.73	20.09	18.93	21.67	17.12	15.91	17.88	18.85	19.44	19.39	22.51	16.41	14.81
ENSMMUG00000000951	1.79	1.32	2.68	2.04	1.31	1.16	2.09	1.43	1.63	0.76	2.18	1.96	1.64	1.07	1.68	1.92	1.77	1.25	2.14	1.99	1.55	1.28	2.56	1.26	1.98	1.74	3.63	3.43	2.77	3.59	2.92	3.48	1.19	1.04	1.5	1.4	1.23	1.1	1.57	1.53	1.32	0.63	1.57	1.11	0.95	1.1	1.07	1.44	1.39
ENSMMUG00000000952	0.09	0.13	0.19	0.08	0.07	0.15	0.06	0.11	0.15	0.11	0.15	0.09	0.13	0.11	0.21	0.2	0.14	0.12	0.13	0.17	0.13	0.22	0.15	0.18	0.12	0.09	0.17	0.1	0.18	0.15	0.19	0.15	0.37	0.5	0.34	0.38	0.38	0.27	0.59	0.34	1.02	0.66	0.29	0.54	0.5	0.49	0.45	0.54	0.6
ENSMMUG00000000953	8.47	9.94	11.38	10.34	9	8.53	10.04	9.9	10.7	11.71	14.73	13.9	13.37	17.11	18.61	17.27	10.27	9.35	8.83	10.76	7.58	13.13	15.79	12.55	8.23	11.06	11.28	7.74	9.18	12.81	12.34	12.2	23.53	25.97	19.74	26.28	23.53	30.21	20.71	23.18	19.05	21.73	17.82	19.47	23.1	22.99	24.34	22.3	22.83
ENSMMUG00000000955	4.03	3.78	4.39	4.22	4.9	4.76	4.14	4.47	4.61	5.08	2.82	4.02	3.37	2.77	3.26	3.55	3.56	3.12	3.7	3.95	2.63	2.74	2.2	2.41	3.73	4.12	3.05	3.11	2.77	2.79	3.45	2.4	13.45	13.01	17.05	13.63	11.01	11.28	11.67	10.75	12.19	17.49	12.06	10.99	10.86	10.07	11.32	9.95	10.37
ENSMMUG00000000956	2.45	2.38	2.34	2.21	2.56	2.35	2.27	2.24	2.2	2.22	2.02	2.19	1.9	2.17	2.1	2.05	1.85	1.87	2.21	2.17	1.77	1.51	1.51	1.88	2.48	2.66	2.43	2.27	1.77	2.03	2.34	1.9	8.93	8.4	9	8.92	7.9	7.3	7.24	7.15	5.69	6.97	6.52	6.08	6.48	6.11	5.95	6.01	4.91
ENSMMUG00000000957	0	0.02	0	0	0	0	0	0	0	0	0	0.08	0.11	0	0	0.11	0	0	0.02	0	0	0.2	0	0	0	0	0	0	0.04	0	0	0	0	0.03	0	0	0	0.11	0	0.18	0	0	0	0	0.09	0.02	0	0.05	0
ENSMMUG00000000958	0.21	0.15	0.06	0.01	0.31	0.15	0.1	0.15	0.43	0.33	0.03	0.19	0.1	0.18	0.03	0.05	0.6	0.32	0.06	0.46	0.2	0.19	0.02	0.06	0.27	0.19	0.06	0.07	0.1	0.07	0.24	0.16	0.19	0.11	0.02	0	0.01	0.01	0.03	0.06	0.42	0.12	0	0	0.04	0	0	0.04	0.42
ENSMMUG00000000959	0.01	0.01	0	0.01	0	0.01	0	0	0.02	0.02	0	0.01	0	0.01	0	0	0	0	0	0	0	0	0	0.04	0	0	0.02	0.04	0	0	0	0.01	0	0.01	0	0	0	0	0	0.01	0	0	0	0	0	0.01	0.01	0	0
ENSMMUG00000000960	29.42	29.47	35.17	29.66	27.72	27.5	24.01	29.23	32.27	26.6	31.54	25.11	28.35	31.83	26	28.82	26.15	19.71	21.92	23.7	23.04	25.74	27.34	23.13	28.13	26.68	30.5	30.26	29.49	35.1	30.49	28.02	20.06	21.09	21.86	21.22	22.18	27.72	26.44	23.21	34.86	31.08	30.42	32.01	22.77	35.63	26.63	29.52	40.09
ENSMMUG00000000961	0.01	0	0.01	0.11	0	0	0.05	0.01	0.06	0	0.01	0.19	0.09	0	0.04	0	0.14	0.06	0	0.07	0.21	0.03	0.04	0.02	0.06	0.01	0.02	0.21	0.04	0	0.03	0	0.27	0.12	0.11	1	0.15	0.16	0.4	0.06	0.03	0.03	0.03	0.31	0.17	0.03	0.23	0.03	0.13
ENSMMUG00000000962	24.03	21.74	24.62	24.1	17.44	15.26	13.69	17.28	21.44	15.22	22.93	25.33	22.54	21.62	25.1	22.63	20.32	21.53	19.83	23.02	21.94	19.12	19.4	22.97	23.04	28.37	32.09	26.01	26.92	25.98	21.9	28.88	56.94	56.92	49.06	55.11	52.76	57	47.16	56.85	32.23	31.72	39.71	32.98	33.55	26.3	32.66	30.64	32.83
ENSMMUG00000000963	23.73	21.74	18.73	22	17.11	15.58	15.78	18.51	10.46	9.21	11.84	11.67	11.16	9.63	10.99	9.94	11.73	11.4	13.1	13.08	12.22	9.83	11.71	12.29	11.49	10.72	11.65	13.57	13.81	10.73	13.69	12.78	16.79	16.31	16.39	15.15	21.66	18.16	18.53	21.36	13.77	12.35	11.84	11.05	10.36	10.48	11.36	11.29	12.74
ENSMMUG00000000964	0	0.01	0.01	0	0.01	0	0.02	0.03	0.03	0.03	0.02	0.01	0.01	0.03	0.03	0.01	0.01	0.01	0.01	0.01	0	0.03	0.07	0.03	0.02	0.01	0	0.01	0	0	0.02	0.01	0	0.05	0.04	0.03	0.03	0.01	0.02	0.02	0.01	0.01	0.01	0.01	0.01	0.03	0.09	0.04	0.02
ENSMMUG00000000965	5.87	5.91	5.88	5.65	5.83	6.1	5.54	5.67	4.39	3.94	3.97	3.71	3.86	3.88	3.55	3.81	3.68	3.39	4.03	3.96	3.61	3.99	4.01	3.97	4.74	4.95	5.87	4.8	5.17	5.54	5.86	5.78	10.89	10.7	10.12	9.98	9	8.75	9.02	8.75	7.43	8.58	8.62	7.32	7.33	7.62	7.94	7.64	7.35
ENSMMUG00000000966	0.99	1.06	1.16	0.84	0.91	1.18	0.92	1.17	1.67	1.5	1.6	1.33	1.58	1.4	1.5	1.26	1.37	0.94	1.02	1.07	1.39	1.1	1.43	1.13	1.18	1.01	0.94	0.86	0.86	1.06	0.87	0.76	2.81	2.69	1.54	1.99	2.25	2.93	1.86	2.25	2.04	1.72	1.83	1.94	1.66	1.81	2.3	1.81	2.23
ENSMMUG00000000968	0.11	0.18	0.13	0.17	0.16	0.14	0.15	0.14	0.18	0.17	0.16	0.16	0.25	0.11	0.19	0.17	0.35	0.3	0.17	0.22	0.15	0.21	0.46	0.33	0.39	0.15	0.18	0.47	0.19	0.19	0.36	0.22	0.4	0.28	0.16	0.39	0.44	0.27	0.19	0.07	0.39	0.17	0.36	0.31	0.23	0.28	0.35	0.28	0.48
ENSMMUG00000000969	0.15	0.13	0.22	0.22	0.28	0.38	0.49	0.42	0.34	0.28	0.44	0.34	0.46	0.8	0.92	0.83	0.4	0.35	0.7	0.84	0.96	1.09	0.89	0.7	0.33	0.64	0.51	0.61	0.54	0.47	0.54	0.29	0.38	0.53	0.45	0.34	0.9	0.33	0.83	0.77	0.58	0.22	0.48	0.54	0.62	0.54	0.73	0.86	0.52
ENSMMUG00000000970	0.38	0.55	0.55	0.19	0.49	0.47	0.12	0.44	0.62	0.31	0.66	1.06	0.66	0.75	0.78	0.68	0.61	0.46	0.12	0.43	1	0.67	1.52	0.89	0.94	0.75	1.19	1.14	1.25	1.16	0.88	0.9	3.19	1.94	3.27	4.52	5.06	4.24	3.51	3.62	1.36	1.57	2.05	3.2	2.77	2.77	2.26	2.52	0.47
ENSMMUG00000000971	0.23	0.34	0.34	0.29	0.07	0.09	0.36	0.31	0.11	0.11	0.08	0.08	0.04	0.14	0.13	0.07	0.02	0.1	0.09	0.31	0.12	0.08	0.18	0.44	0.55	0.39	1.31	0.71	0.79	1.49	0.75	1.08	0.68	0.57	0.39	0.55	0.42	0.46	0.42	0.76	0.33	0.33	0.65	0.53	0.36	0.36	0.6	0.57	0.35
ENSMMUG00000000972	14.73	14.78	15.66	14.72	14.34	15.44	15.84	14.74	19.09	19.58	24.8	28	30.33	33.96	37.45	33.64	18.58	19.7	22.97	24.92	28.54	30.62	36.18	31.78	17.03	18.76	16.9	17.24	21.13	29.31	22.6	20.13	25.46	31.52	27.57	31.68	32.21	38.71	36.05	33.43	21.63	22.04	24.95	29.09	33.17	28.05	34.1	33.7	23.53
ENSMMUG00000000973	11.49	10.44	13.84	12.23	8.79	9.48	8.96	9.88	13.78	9.03	13.32	15.2	12.22	14.04	14.82	13.12	11.42	8.44	10.61	15.75	11.39	11.44	13.12	11.53	11.84	9.66	14.54	16.54	12.45	19.9	12.42	12.33	30.71	32	26.73	30.55	27.65	35.89	27.67	31.09	16.22	13.21	14.44	19.3	14.81	13.86	18.39	16.71	15.71
ENSMMUG00000000974	6.56	6.56	7.22	6.46	6.65	6.85	5.58	7.38	5.82	6.78	5.86	6.22	6.82	6.08	6.21	6.56	3.77	4.57	7.2	5.84	6.18	4.51	4.74	5.57	5.07	5.1	6.79	5.13	4.49	5.24	6.13	4.62	9.3	9	11.79	10.01	8.72	9.03	9.33	10.99	4.88	6.97	7.89	6.94	6.98	7.91	7.99	8.1	6.78
ENSMMUG00000000975	0.06	0.03	0.03	0.05	0.07	0.08	0.05	0.04	0.03	0.03	0.01	0.03	0.03	0.05	0.03	0.02	0.03	0.02	0.05	0.04	0.04	0.07	0.01	0.03	0.05	0.03	0.04	0.03	0.05	0.05	0.05	0.02	0.09	0.05	0.06	0.05	0.03	0.05	0.05	0.04	0.07	0.06	0.06	0.05	0.04	0.09	0.07	0.07	0.05
ENSMMUG00000000976	0.99	1.13	1.49	1.41	1.23	1.14	1.36	1.15	2.1	1.55	1.84	2.36	2.02	1.93	1.48	1.68	3.13	1.89	2.1	2.29	2.32	2.3	2.62	1.92	1.69	1.38	1.82	1.89	1.5	2.08	1.07	1.06	26.18	23.56	26.31	28.38	29.69	33.78	31.98	28.69	11.44	8.68	9.15	8.5	7.95	10.48	8.59	8.07	5.46
ENSMMUG00000000978	0.52	0.58	0.7	0.62	0.62	0.63	0.48	0.64	0.61	0.48	0.72	0.77	0.73	0.58	0.59	0.74	0.54	0.58	0.58	0.56	0.35	0.66	0.66	0.59	0.62	0.62	0.55	0.57	0.54	0.48	0.52	0.49	4.19	4.97	4	4.02	4.38	5.74	4.58	4.18	2.71	2.22	2.35	2.63	2.47	2.47	2.66	2.37	1.86
ENSMMUG00000000979	3.09	3.43	4.62	2.6	2.38	2.39	4.22	4.03	1.6	1.56	1.96	1.73	2.25	2.21	2.53	2.82	1.58	1.95	2.68	2.29	2.8	2.32	3.87	2.91	3.95	4.71	9.24	5.75	6.62	8.27	9.17	11.15	6.13	6.09	5.57	6.79	7.04	6.47	7.14	7.49	2.06	1.93	3.25	3.55	3.04	2.68	5.48	3.63	2.58
ENSMMUG00000000980	0	0	0	0	0	0	0	0	0	0	0	0	0	0	0	0	0	0	0	0	0	0	0	0	0	0	0	0	0	0	0	0	121.34	131.19	120.48	125.25	131.66	147.04	150.12	137.92	139.29	128.28	143.82	145.58	156.28	150.62	142.19	154.44	127.16
ENSMMUG00000000981	0	0	0	0	0	0	0	0	0	0	0	0	0	0	0	0	0	0	0	0	0	0	0	0	0	0	0	0	0	0	0	0	0.4	0.22	0.36	0.53	0.25	0.45	0.39	0.34	0.49	0.2	0.49	0.6	0.41	0.51	0.34	0.49	0.29
ENSMMUG00000000982	0	0	0	0	0	0	0	0	0	0	0	0	0	0	0	0	0	0	0	0	0	0	0	0	0	0	0	0	0	0	0	0	21.98	23.71	22.62	24	21.84	27.25	24	23.91	14.86	13.45	12.6	14.62	14.8	13.79	14.24	15.21	12.45
ENSMMUG00000000983	0	0	0	0	0	0	0	0	0	0	0	0	0	0	0	0	0	0	0	0	0	0	0	0	0	0	0	0	0	0	0	0	37.55	37.71	41.06	41.59	54.95	60.57	58.02	50.84	47.26	38.6	46.13	51.44	50.68	58.41	49.12	51.85	44.54
ENSMMUG00000000984	0.12	0.1	0.09	0.26	0.16	0.2	0.14	0.24	0.14	0.05	0.19	0.31	0.3	0.3	0.43	0.45	0.09	0.14	0.12	0.28	0.21	0.4	0.26	0.29	0.08	0.11	0.21	0.42	0.43	0.52	0.33	0.51	0.08	0.13	0.11	0.11	0.15	0.23	0.31	0.31	0.13	0.12	0.11	0.28	0.17	0.25	0.39	0.28	0.09
ENSMMUG00000000985	3.09	3.89	2.82	3.25	2.57	2.2	2.31	2.66	2.24	2.07	2.9	3.16	3.6	3.48	3.57	3.57	2.67	2.6	3.06	3.03	3.51	3.86	3.74	3.01	2.98	2.87	3.69	3.98	3.11	4.12	3.05	3.82	2.37	2.62	2.82	3.02	2.52	3.16	3.08	3.69	2.75	2.73	3.25	3.86	3.88	3.92	4.26	3.46	2.61
ENSMMUG00000000986	0.01	0.02	0.05	0.02	0.03	0.02	0.03	0.01	0	0.03	0.01	0.06	0.05	0.04	0.01	0.04	0.03	0.02	0	0.01	0.03	0.01	0	0.01	0.01	0	0	0	0	0.01	0.03	0.05	0.02	0.02	0.01	0.03	0	0.03	0.02	0	0.01	0.01	0.08	0.01	0.02	0.03	0.03	0.02	0.03
ENSMMUG00000000987	0.18	0.23	0.1	0.12	0.17	0.09	0.09	0.15	0.03	0.03	0.06	0.04	0.12	0.04	0.05	0.11	0.05	0.05	0.1	0.02	0.09	0.08	0.14	0.14	0.19	0.2	0.36	0.27	0.3	0.39	0.29	0.36	0.05	0.04	0.08	0.05	0.1	0.05	0.1	0.09	0.13	0.13	0.24	0.16	0.26	0.2	0.35	0.19	0.07
ENSMMUG00000000988	0.04	0	0	0	0	0.04	0.02	0	0.03	0	0	0	0	0.04	0	0	0	0	0	0	0	0	0	0	0	0	0	0.07	0	0	0	0	0	0.02	0	0.08	0.03	0	0.03	0	0	0	0	0	0	0	0.02	0	0
ENSMMUG00000000989	0.06	0	0.01	0.01	0.01	0.02	0.02	0.01	0.04	0	0.06	0	0.01	0.07	0.01	0	0	0.03	0.02	0.01	0	0.01	0	0.02	0.04	0	0.04	0	0.01	0.03	0.03	0.05	0.03	0	0.01	0.03	0	0.01	0.04	0	0.05	0	0.04	0.05	0.02	0.01	0.06	0.06	0.03
ENSMMUG00000000990	17.66	16.99	15.33	15.1	11.76	11.01	13.08	12.63	12.95	10.56	17.65	13.88	14.72	14.59	16.88	12.95	13.45	12.32	11.95	13.92	12.96	14.39	20.13	13.49	11.45	12.3	15.02	13.76	14.5	17.66	16.19	15.03	12.09	13.01	11.4	13.29	13.63	15.67	13.87	13.61	15.72	13.74	14.59	14.94	14.31	15.43	17.91	14.07	14.16
ENSMMUG00000000991	0.01	0.02	0	0.01	0.01	0.03	0.01	0.01	0.03	0	0	0.01	0.01	0.03	0.03	0.07	0.07	0.04	0.03	0.02	0.06	0.01	0.06	0.06	0.02	0.01	0.02	0.01	0.04	0.12	0.01	0	0	0	0.02	0.01	0.01	0.02	0.01	0	0.04	0.01	0	0.03	0.01	0.07	0.05	0.05	0.1
ENSMMUG00000000994	11.78	10.41	12.95	12.79	12.94	13.98	10.83	12.11	11.86	11.67	15.78	13.55	15.23	17.18	13.73	13.75	10.04	8.09	11.14	12.44	12.06	12.97	16.42	11.73	9.81	8.44	10.76	10.62	12.22	11.97	11.92	10.4	21.44	24.46	23.12	26.18	25.06	30.7	28.42	24.8	17.07	16.05	19.29	19.3	18.01	21.42	17.02	20.05	14.33
ENSMMUG00000000995	0.71	0.54	0.79	0.62	0.67	0.57	0.58	0.56	0.46	0.32	0.8	0.53	0.75	0.71	0.53	0.89	0.34	0.44	1.07	0.86	0.88	0.7	0.81	1.16	0.63	0.71	0.97	0.73	0.8	0.8	0.62	0.99	1.41	0.74	1.85	1.99	1.88	1.61	1.59	1.71	0.88	0.66	1.19	1.18	1.12	1.26	1.04	0.83	0.68
ENSMMUG00000000996	3.09	3.49	3.96	3.36	2.96	3.09	3.32	3.78	3.93	4.23	4.08	3.95	3.21	4.24	3.88	4.19	4.01	2.69	3.21	4.32	3.18	3.74	3.77	3.08	3.92	3.57	3.13	2.6	3.19	3.81	3.38	3.55	15.07	17.59	24.33	18.97	17.2	15.51	17.27	17.98	11.26	13.55	13.42	10.78	10.64	15.54	11.57	13.33	9.79
ENSMMUG00000000997	1.91	2.04	2.5	1.93	1.65	1.41	1.58	2.16	1.69	1.02	2.87	1.55	1.93	2.48	2.56	2.29	1.65	1.36	2.72	1.85	1.61	2.55	1.67	2.04	1.42	1.37	2.32	1.5	1.11	1.88	2.04	1.57	1.64	1.78	2.56	1.62	1.93	2.45	2.4	2.6	1.41	1.27	2.07	1.37	1.56	1.25	1.51	1.84	2
ENSMMUG00000000999	0.05	0	0.02	0	0	0	0	0	0	0	0	0	0	0	0	0	0.03	0	0	0	0	0	0	0.11	0	0	0	0.05	0	0	0	0	0	0	0	0.15	0	0	0	0	0.13	0	0	0	0	0	0	0	0
ENSMMUG00000001000	1.69	1.48	1.26	1.35	0.64	0.72	0.65	1.32	1.63	1.53	1.34	1.66	1.87	1.61	3.06	1.94	1.61	0.88	1.14	2.44	1.26	1.7	2.58	1.18	1.88	2.48	1.06	1.04	0.97	0.8	0.98	1.49	2.08	1.91	1.24	2.37	1.23	2.57	1.69	2.68	2.39	1.2	1.27	2.43	1.31	1.1	2.54	2.03	1.93
ENSMMUG00000001001	0.05	0.02	0	0.02	0	0.01	0	0	0	0	0	0	0	0	0	0.02	0	0.01	0	0	0	0	0	0.03	0	0	0.02	0.04	0	0	0	0	0.02	0.01	0	0.03	0	0	0	0	0	0	0	0	0	0.04	0.01	0	0.02
ENSMMUG00000001002	0	0	0	0	0	0	0	0	0	0	0	0	0	0	0	0.01	0	0	0	0	0	0.01	0	0.01	0.01	0.01	0	0	0.01	0	0	0	0.06	0.02	0.01	0	0.01	0.01	0.02	0.04	0	0.01	0	0.01	0.01	0	0	0	0
ENSMMUG00000001003	3.3	3.17	4.36	3.89	3.58	3.24	2.96	3.84	3.34	2.53	4.58	4.54	5.23	6.16	5.33	5.66	2.96	2.23	4.09	4.42	4.34	3.11	4.4	4.04	2.95	2.44	3.06	2.53	3.2	4.05	3.72	3.94	7.25	8.1	7.3	8.43	10.45	10.54	7.94	10.69	4.66	5.04	5.16	5.58	7.2	5.65	6.63	6.72	4.78
ENSMMUG00000001005	8.48	8.33	7.76	7.47	7.94	8.38	7.18	8.15	8.23	6.93	7.01	6.67	5.49	6.36	6.02	6.59	7.26	6.52	6.56	6.46	5.78	6.21	6.04	5.97	8.24	8.18	9.01	7.42	7.36	7.51	7.46	9.52	7.8	7.34	8.37	6.9	7.11	6.74	6.33	8.1	8.03	8.52	8.31	7.1	7.45	9.07	8.75	8.04	6.77
ENSMMUG00000001006	12.53	10.94	14.18	12.09	12.04	11.91	11.14	12.39	11.61	11.14	11.07	11.47	10.25	9.56	11.77	11.83	9.84	8.57	12.4	10.59	9.49	9.7	9.44	9.95	10.25	11.35	12.59	9.61	9.03	9.52	12.08	10.16	20.75	21.4	23.04	19.91	20.55	17.33	19.07	23.06	15.73	16.55	18.87	15.85	15.18	15.48	17.1	16.9	13.18
ENSMMUG00000001008	0.95	1.02	1.2	0.99	1.17	1.27	2.27	1.23	1.34	1.39	1.39	1.49	1.38	1.58	1.62	1.68	1.04	1.02	1.45	1.36	1.11	1.36	1.32	1.19	1.11	1.08	1.14	0.92	0.91	1.12	1.55	1.06	5.74	6.02	6.77	5.87	4.17	4.55	5.29	5.26	1.6	1.66	2.17	1.75	1.86	1.97	2.03	2.27	1.36
ENSMMUG00000001009	0.05	0	0.04	0.05	0	0	0	0	0.09	0.06	0.05	0.04	0.1	0.05	0	0	0.01	0	0.18	0.02	0	0	0	0.01	0	0.03	0.11	0.09	0	0.09	0.05	0	0.05	0.03	0.05	0	0.02	0	0	0	0.01	0.01	0.05	0.01	0.05	0	0	0	0.07
ENSMMUG00000001010	18.96	15.76	20.04	16.41	11.36	9.63	11.37	15.93	19.38	14.9	16.92	19.24	28.4	19.07	19.85	21.91	12.15	10.93	11.46	13.43	16.31	19.39	11.98	17.91	15.34	13.63	30.53	14.56	17.55	21.43	16.23	18.68	18.46	18.14	14.73	15.29	16.27	15.86	14.8	18.72	13.61	16.56	21.19	18.11	18.06	14.45	16.41	20.13	16.45
ENSMMUG00000001011	0.06	0.04	0.2	0.06	0.03	0.17	0.22	0.08	0.1	0.19	0.11	0.03	0.07	0.03	0.04	0.05	0.2	0.34	0.26	0.22	0.02	0.14	0.1	0.23	0.04	0.02	0.15	0.13	0.05	0.08	0.12	0.06	0	0.12	0.14	0.11	0.05	0.05	0.19	0.1	0.15	0.25	0.1	0.12	0	0.12	0.11	0.02	0.08
ENSMMUG00000001012	3.1	3.41	4.39	3.36	3.63	3.26	3.15	3.85	10.25	9.73	10.35	11.92	8.99	7.76	7.28	8.87	10.56	9.33	12.55	10.71	8.36	8.51	7.46	9.31	6.64	6.73	4.05	3.74	2.74	2.54	3.24	2.96	59.85	59.79	75.99	62.65	62.55	53.37	66.1	60.49	14.16	13.99	13.4	11.17	10.99	10.15	9.87	11.01	13.02
ENSMMUG00000001014	0.37	0.44	0.38	0.21	0.24	0.34	1.06	0.86	0.09	0.1	0.09	0.09	0.64	1.39	0.91	1.15	0.05	0.07	0.41	0.02	1.96	2.41	5.86	4.51	0.22	0.2	0.83	0.77	1.46	1.43	1.99	1.95	0.11	0.21	0.2	0.21	1.54	2.78	3.71	5.44	0.19	0.36	1.64	0.67	2.87	3.54	4.78	4.25	0.26
ENSMMUG00000001016	0.03	0.09	0.09	0.03	0.05	0.04	0.08	0.14	0.06	0.05	0.05	0.16	0.11	0.03	0.02	0.1	0.05	0.03	0	0.11	0.15	0.11	0.28	0.01	0.05	0.02	0.11	0.14	0.02	0.25	0.19	0.24	0.14	0.35	0.04	0.27	0.1	0.02	0.16	0.19	0.05	0.05	0.19	0.2	0.06	0.03	0.1	0.03	0.23
ENSMMUG00000001017	0.02	0.01	0.02	0.01	0	0.02	0.01	0	0.02	0.02	0.01	0.01	0	0.02	0.03	0.02	0	0	0.05	0.07	0.01	0	0.01	0.03	0.02	0	0.03	0.03	0.01	0.04	0.16	0	0.01	0.01	0.04	0.05	0.01	0.02	0.02	0.05	0.02	0	0.04	0.03	0.02	0.01	0.06	0.04	0
ENSMMUG00000001018	2.49	2.62	2.68	2.33	2.57	2.46	1.91	3.01	2.69	2.57	2.75	2.79	3.39	2.45	2.48	2.64	2.48	1.49	2.33	2.89	1.94	1.71	1.46	1.93	2.41	2.05	2.33	1.93	1.88	2.27	2.01	2.54	5.46	6.23	4.62	7.01	6.72	6.62	5.74	6.8	4.62	4.71	4.16	5.51	5.27	4.78	6.11	5.02	3.44
ENSMMUG00000001019	0	0	0	0.01	0	0.04	0.03	0.06	0.03	0	0.02	0	0	0.02	0	0.01	0.04	0.02	0	0	0	0.02	0.02	0	0.01	0	0.02	0	0	0	0	0	0.03	0	0.02	0.01	0	0	0.03	0	0	0	0.03	0	0.01	0.06	0	0	0.09
ENSMMUG00000001021	8.84	8.75	10.3	9.19	11.54	11.52	12.99	12.06	10.35	12.24	12.7	11.6	12.69	13.84	14.14	14.27	7.28	6.89	10.96	10.09	10.03	11.4	13.07	12.31	7.96	7.67	8.59	7.12	8.43	8.41	10.04	7.92	10.97	10.58	13.92	12.16	12.79	11.04	12.98	14.05	11.05	12.27	15.12	15.56	13.29	16.89	18.8	17.83	9.71
ENSMMUG00000001022	0.03	0	0.01	0	0.02	0	0.01	0	0	0	0.01	0.01	0.04	0.02	0	0.02	0	0	0.06	0.02	0	0.02	0.04	0.01	0	0	0.04	0	0	0	0	0	0	0	0.03	0.03	0.03	0.02	0.01	0.04	0.01	0	0	0	0	0	0	0	0
ENSMMUG00000001024	0.3	0.49	0.42	0.41	0.38	0.37	0.31	0.28	0.4	0.7	0.34	0.52	0.34	0.53	0.38	0.34	0.38	0.4	0.4	0.64	0.44	0.66	0.98	0.51	0.43	0.52	0.6	0.48	0.51	0.46	0.65	0.57	0.67	1.26	1.23	1.01	1.18	1.1	1.1	1.17	0.35	0.9	0.76	0.74	0.87	0.78	0.76	0.88	0.37
ENSMMUG00000001025	0.02	0	0	0	0	0	0	0.02	0	0	0	0	0	0	0	0	0.05	0	0	0	0	0.12	0	0.02	0	0	0	0	0	0	0	0	0	0	0.02	0	0	0.03	0.03	0	0	0	0	0	0	0	0	0	0
ENSMMUG00000001026	11.19	11.59	14.34	10.63	10.11	10.31	9.03	9.97	13.27	12.41	15.82	12.9	13.4	11.27	13.75	11.95	9.87	11.23	12.48	12.56	11.38	10.69	12.64	10.26	11.18	11.96	12.18	11.38	8.44	11.68	11.1	8.52	24.31	27.22	21.29	22.52	21.78	22.23	19.54	21.08	17.97	18.21	17.48	16.92	14.17	13.3	14.95	14.85	16.36
ENSMMUG00000001027	0.45	0.31	0.31	0.46	0.57	0.41	0.28	0.39	0.35	0.39	0.33	0.37	0.57	0.6	0.35	0.47	0.39	0.38	0.37	0.56	0.36	0.59	0.26	0.31	0.38	0.3	0.33	0.34	0.21	0.33	0.31	0.24	10.58	10.98	7.33	12.4	11.55	9.96	9.73	9.52	6.52	6.6	6.61	6.6	8.15	5.72	6.02	6.17	4.49
ENSMMUG00000001028	6.48	7.05	6.82	6.49	5.52	5.94	5.58	5.94	7.09	7.33	7.57	7.19	7.24	6.86	7.37	7.58	6.3	5.28	7.16	6.57	6.46	5.74	7	7.08	6.44	6.1	6.74	5.77	4.96	5.85	7.12	5.2	22.64	23.11	21.81	21.15	22.65	20.14	19.86	24.58	9.72	12.06	12.55	12.14	11.04	10.73	12.41	12.54	9.54
ENSMMUG00000001029	3.8	3.83	4.22	3.16	3.42	3.06	3.17	3.47	4.71	4.26	6.04	4.91	5.7	5.58	5.14	4.8	3.56	3.04	4.74	4.8	3.89	4.4	5.47	4.41	3.47	2.79	4.74	4.02	4.46	4.75	5.32	4.07	4.54	4.22	7.63	6.69	8.08	7.84	7.69	7.48	6.69	6.55	7.18	6.24	7.19	6.94	5.98	6.48	6.64
ENSMMUG00000001030	6.42	5.73	6.49	6.22	7.51	8.3	6.03	6.5	9.68	8.29	10.74	9.23	10.08	10.34	10.15	10.11	8.42	6.19	7.82	8.52	7.81	8.11	7.62	7.9	7.46	7.26	7.02	6.49	6.5	8.5	7.05	5.3	25.27	29.99	18.56	22.9	20.5	31.76	26.81	29.89	14.87	14.44	17.51	17.46	14.83	21.23	15.96	18.35	11.84
ENSMMUG00000001031	1.22	1.34	1.37	1.02	1.09	1.05	0.94	0.82	1.2	0.82	1.39	1.32	0.97	0.97	1.16	1.13	1.48	1.35	1.27	1.12	0.37	0.91	1.04	0.63	1.29	1.54	1.55	1.3	1.38	0.97	1.2	1.28	3.34	3.62	3.86	3.82	3.57	3.39	3.29	2.86	2.84	2.36	2.54	2.19	2.47	2.1	1.78	2.18	2.53
ENSMMUG00000001034	0.78	1.04	1.02	0.91	1.18	0.89	0.89	1.23	0.87	0.96	1.1	0.75	1.26	0.96	1.14	1.03	0.89	0.8	0.77	0.9	1.14	1.05	1.31	1.26	1.31	0.87	0.86	0.83	1.03	1.08	0.67	0.96	3.23	3.33	2.68	3.83	4.19	3.06	3.07	5.18	2.14	2.89	3.06	2.8	2.59	2.41	2.83	3.94	1.32
ENSMMUG00000001035	9.29	9.8	8.49	8.28	6.72	6.75	6.86	7.18	9.28	8.46	9.68	9.16	10.84	11.04	11.05	9.4	7.62	8.08	7.37	9.1	9.25	9.2	11.94	8.74	8.87	8.38	9.41	9.16	9.76	9.01	8.5	8.99	9.82	12.6	10.25	12.55	12.24	13.96	13.02	12.23	12.2	11.25	11.51	11.94	11.03	12.5	11.15	11.17	10.86
ENSMMUG00000001036	0.12	0.15	0.26	0.17	0.28	0.07	0.21	0.22	0.5	0.76	0.49	0.38	0.69	0.54	0.64	0.39	0.16	0.3	0.26	0.26	0.33	0.2	0.67	0.25	0.21	0.34	0.21	0.09	0.15	0.19	0.14	0.3	2.48	2.59	1.66	2.11	2.18	2.71	2.19	1.94	1.07	1.38	0.75	0.87	1.54	0.8	1.06	1.45	1.25
ENSMMUG00000001037	0.18	0.09	0.27	0.17	0.15	0.09	0.06	0.18	0.27	0.11	0.29	0.07	0.09	0.13	0.18	0.12	0.06	0.1	0.15	0.04	0.16	0.09	0.08	0.15	0.28	0.14	0.33	0.24	0.23	0.41	0.21	0.52	0.33	0.48	0.55	0.46	0.53	0.4	0.22	0.27	0.61	0.42	0.43	0.39	0.48	0.25	0.58	0.4	0.93
ENSMMUG00000001038	0.45	0.25	0.28	0.47	0.32	0.19	0.22	0.33	0.17	0.5	0.47	0.36	0.5	0.26	0.2	0.57	0.33	0.38	0.41	0.33	0.38	0.46	0.2	0.32	0.44	0.37	0.29	0.4	0.33	0.33	0.26	0.27	2.39	2.79	1.98	2.13	1.19	1.96	2.17	2.98	1.35	1.02	1.79	1.25	0.99	1.33	1.55	1.23	1.03
ENSMMUG00000001039	0	0	0.02	0.01	0.03	0.01	0.03	0.03	0.01	0.06	0.01	0.01	0.03	0.03	0.01	0.04	0.01	0.05	0.03	0.02	0.06	0.04	0	0.05	0.04	0.06	0	0	0	0.01	0	0.03	0.95	0.66	0.39	0.36	0.21	0.28	0.5	0.26	0.06	0.18	0.08	0.09	0.08	0.07	0.14	0.12	0.14
ENSMMUG00000001040	0.28	0.34	0.37	0.22	0.21	0.46	0.4	0.36	0.3	0.22	0.41	0.32	0.23	0.37	0.51	0.54	0.11	0.18	0.36	0.16	0.19	0.2	0.34	0.43	0.21	0.37	0.52	0.25	0.15	0.46	0.47	0.51	0.51	0.58	0.61	0.38	0.28	0.64	0.56	0.44	0.79	0.58	0.78	0.46	0.49	0.71	0.5	0.85	0.49
ENSMMUG00000001041	2.56	2.16	2.96	2.58	2.71	3.03	2.31	2.85	2.51	2.74	3.13	2.95	3.32	3.7	3.74	3.67	2.38	2.11	3.27	3.06	3.32	3.25	2.4	3.35	3.03	2.49	2.56	2.29	2.04	2.44	2.5	2.58	10.64	12.88	13.41	13.48	11.46	12.82	10.33	13.31	8.43	9.6	9.63	9.37	7.25	9.13	6.68	8.21	5.65
ENSMMUG00000001043	0.06	0.1	0.18	0.08	0.09	0.15	0.16	0.25	0.05	0.08	0.23	0.14	0.14	0.28	0.12	0.26	0.17	0.1	0.23	0.08	0.16	0.25	0.24	0.46	0.05	0.1	0.14	0.12	0.2	0.28	0.24	0.41	10.39	10.82	7.61	9.05	7.88	8.11	7.92	8.96	1.51	1.85	3.15	2.34	2.71	3.06	3.73	4.34	2.23
ENSMMUG00000001044	17.12	16.02	17.23	15.34	12.88	12.19	11.76	12.58	18.46	14.1	18.62	20.08	20.78	19.95	21.42	19.67	16.16	14.56	14.42	17.88	18.39	16.15	21	16.26	14.98	14.43	14.52	17.46	17.94	20.03	16.26	17.34	16.07	16.27	14.13	19.51	18.24	21.76	18.31	18.08	20.63	16.53	17.12	20.56	21.88	18.5	19.87	19.84	21.48
ENSMMUG00000001045	5.52	5.02	6.01	4.71	5.24	5.96	4.45	5.42	3.52	3.16	3.6	4.09	3.73	4.88	4.37	4.19	2.94	2.78	4.45	3.95	3.69	4.13	3.33	4.17	3.91	3.15	4.36	3.55	3.15	4.17	4.56	4.04	9.04	7.93	12.69	10.54	8.55	10.13	9.7	9.01	8.04	8.12	10.25	10.12	8.45	9.53	8.67	8.14	7.92
ENSMMUG00000001047	0.05	0.09	0.08	0.15	0.02	0.07	0.06	0.03	0.06	0.03	0.13	0.08	0.14	0.04	0.05	0.15	0.03	0	0.14	0.17	0.04	0.23	0.18	0.29	0.04	0.05	0.07	0	0.07	0.06	0.07	0.2	0.03	0.04	0.17	0.16	0.13	0.15	0.13	0.07	0.02	0.06	0.15	0.19	0.28	0.23	0.07	0.47	0.09
ENSMMUG00000001048	0.72	0.46	0.38	0.6	0.49	0.46	0.64	0.43	0.45	0.23	0.03	0.47	0.36	0.53	0.74	0.84	0.29	0.16	0.64	0.49	0.39	0.33	0.46	0.48	0.24	0.84	0.33	1.02	0.54	0.38	0.93	0.6	0.97	0.72	1.91	1.43	1.42	1.48	1.18	1.32	1.14	1.14	1.61	0.89	1.74	1.48	1.87	1.65	1.14
ENSMMUG00000001049	14.51	13.69	10.51	9.98	8.35	7.85	7.99	9.9	9.89	6.77	7.43	8.01	8.06	6.1	9.57	8.52	10.88	10.76	8.77	9.18	9.02	7.46	9.34	9.01	8.93	8.8	7.84	8.49	9.11	7.78	10.72	8.38	5.83	4.53	4.69	4.74	5.12	4.31	5.28	5.39	11.74	12.12	9.79	9.73	9.54	7.34	11.21	8.88	13.09
ENSMMUG00000001050	0.48	0.21	0.83	0.39	0.35	0.16	0.27	0.54	0.39	0.26	1.04	0.8	0.57	0.78	0.7	0.84	0.34	0.32	0.91	0.6	0.42	0.84	0.28	0.63	0.35	0.49	0.77	0.39	0.59	0.6	0.34	0.97	0.29	0.42	0.42	0.63	0.4	0.23	0.38	0.33	0.64	0.52	1.04	0.52	0.48	1.15	0.58	0.63	0.49
ENSMMUG00000001051	4.95	4.76	6.32	5.22	4.04	4.09	4.05	4.16	8.9	7.65	8.21	7.37	5.67	6.61	7.39	6.48	6.46	7.09	6.78	7.1	5.47	5.18	6.7	5.8	5.97	5.93	5.16	5.01	4.13	4.89	4.8	3.21	19.86	18.37	14.32	13.25	13.58	13.27	13.58	16.42	16.91	14.74	13.66	13.86	15.39	14.15	18.52	13.72	12.86
ENSMMUG00000001053	0.32	0.27	0.27	0.33	0.37	0.36	0.32	0.34	0.21	0.32	0.25	0.35	0.33	0.25	0.42	0.43	0.34	0.35	0.26	0.25	0.38	0.46	0.36	0.4	0.38	0.29	0.44	0.49	0.4	0.5	0.4	0.38	8.44	7.91	6	7	6.9	8.33	9.49	7.84	4.31	4.53	3.7	3.67	4.47	4.34	4.61	4.24	2.87
ENSMMUG00000001054	105.8	100.52	105.6	94.34	64.01	58.66	61.31	63.65	81.15	58.37	96.87	80.47	80.16	85.04	95.03	77.91	66.28	58.83	68.87	77.28	73.84	71.03	69.77	68.76	74.12	67.31	79.52	68.86	79.63	91.3	67.58	80.32	60.37	54.8	55.39	61.63	76.67	70.08	61.86	64	67.23	63.26	78.52	74.16	67.68	57.73	75.97	55.64	65.44
ENSMMUG00000001056	0.01	0	0	0.02	0.01	0.03	0.02	0	0	0	0	0	0	0	0	0	0	0.07	0.03	0	0	0	0	0	0.01	0	0	0	0	0	0	0.04	0	0.01	0	0.01	0	0.03	0	0.02	0	0	0	0.03	0	0.04	0.02	0.03	0.01
ENSMMUG00000001057	0.22	0.13	0.1	0.19	0.17	0.24	0.16	0.13	0.73	0.68	0.52	0.67	0.48	0.64	0.3	0.53	0.24	0.33	0.33	0.61	0.18	0.33	0.36	0.2	0.16	0.21	0.12	0.22	0.15	0.22	0.16	0.2	0.22	0.14	0.15	0.15	0.19	0.2	0.12	0.13	0.54	0.57	0.24	0.27	0.23	0.22	0.19	0.21	0.66
ENSMMUG00000001058	1.08	1.24	0.71	1.01	0.9	0.95	0.65	0.71	0.9	0.82	0.83	1.02	0.77	0.78	0.77	0.85	0.66	0.61	0.64	0.72	0.45	0.54	0.63	0.56	0.62	0.66	0.41	0.59	0.58	0.57	0.72	0.69	2.07	2.27	1.96	1.72	1.5	1.56	1.67	2.37	6.35	7.43	5.55	4.95	5.75	5.88	4.82	5.35	5.65
ENSMMUG00000001060	8.5	7.94	7.03	10.95	14.3	15.67	11.65	12.47	5.23	6.18	5.86	5.57	4.81	5.61	4.7	4.89	6.97	5.48	4.81	4.18	4.05	5.55	4.89	4.63	7.19	6.49	5.55	6.68	7.5	6.06	8.7	7.12	24.46	24.4	28.26	25.12	20.38	20.84	21.88	20.84	18.5	21.48	17.74	17.61	15.78	17.81	16.49	14.65	14.87
ENSMMUG00000001061	7.94	8.44	10.29	8.91	10.94	10.04	8.44	8.43	8.85	9.8	11.15	10.27	10.37	9.98	10.05	8.98	8.25	8.45	8.65	9.28	9.32	8.33	8.58	8.08	7.31	8.73	8.84	6.02	8.33	8.27	8.65	6.94	9.85	9.98	9.37	9.64	9.85	10.23	9.62	9.91	9.3	11.1	9.99	9.06	9.22	8.82	9.64	8.67	10.54
ENSMMUG00000001062	5.32	5.43	6.02	5.3	4.62	4.75	3.92	5.04	5.16	4.07	5.99	5.32	5.38	4.6	6.36	5.55	3.89	3.59	3.42	4.58	3.68	3.64	3.6	3.19	3.64	3.88	3.8	3.58	3.19	4.04	4.21	3.95	10.33	10.56	8.85	9.84	11.31	9.08	9.61	12.59	7.25	7.75	7.86	7.84	8.03	6.84	9.53	8.2	6.41
ENSMMUG00000001063	5.55	4.92	6.14	5.69	6.42	6.15	6.06	6.45	4.87	5.54	4.29	5.37	4.23	4.17	4.63	4.63	4	3.99	4.91	4.38	3.73	3.71	3.11	3.87	4.67	4.72	5.03	4.55	4.19	4.13	5.46	4.39	5.62	6.38	8.01	6.88	6.57	5.93	6.77	7.38	4.63	6.02	5.8	6.13	5.34	5.26	5.56	5.48	6.06
ENSMMUG00000001064	0	0	0	0.02	0.01	0	0.01	0.02	0	0	0	0.02	0	0.02	0	0	0.01	0	0	0	0	0	0.03	0	0	0	0.02	0.02	0	0	0	0	0	0.04	0.04	0	0	0.02	0	0	0.01	0	0	0.03	0	0	0	0.02	0
ENSMMUG00000001065	0.03	0	0	0	0	0	0	0	0	0	0	0	0	0	0.01	0	0.01	0	0	0	0.01	0	0	0	0.01	0	0	0.03	0.03	0	0	0	0.02	0.02	0.02	0	0	0.01	0	0.02	0	0	0	0	0	0.01	0	0	0
ENSMMUG00000001066	0	0	0	0	0	0.02	0	0	0	0	0	0	0	0	0	0	0	0	0.01	0	0	0	0	0	0	0	0	0	0	0	0	0	0	0	0	0.01	0	0	0	0	0.01	0	0	0	0	0	0.01	0	0
ENSMMUG00000001067	0	0	0	0	0	0.03	0	0	0	0	0	0	0	0	0	0.04	0	0.1	0.03	0	0	0	0	0	0	0	0	0	0	0	0	0	0	0	0.03	0	0.09	0	0	0	0	0	0	0.02	0.11	0	0	0	0
ENSMMUG00000001068	0	0	0.01	0	0	0.02	0	0	0	0	0	0	0	0.04	0.03	0	0	0.02	0	0	0	0	0	0	0.04	0	0	0.02	0	0	0	0.04	0	0	0	0	0	0.01	0.06	0	0	0	0.01	0.01	0	0.01	0	0	0
ENSMMUG00000001069	0	0	0.03	0.01	0.01	0.01	0.01	0.01	0	0	0	0	0	0	0.03	0.01	0	0.02	0	0.02	0.07	0	0	0	0.01	0.03	0	0	0.03	0.04	0	0	0.03	0.01	0.03	0	0.02	0	0.02	0	0	0.04	0	0	0	0	0	0	0.01
ENSMMUG00000001070	0.01	0	0	0	0.01	0	0	0	0	0	0	0	0	0	0	0.02	0	0	0	0	0.02	0	0	0	0	0	0.03	0	0	0	0	0	0	0	0	0.01	0.03	0	0	0	0	0	0	0	0.01	0	0	0	0.01
ENSMMUG00000001071	0	0.02	0	0.01	0	0.01	0	0	0	0	0.05	0.02	0	0	0	0	0	0.03	0.03	0	0	0	0	0	0.04	0	0	0.02	0.03	0	0	0	0.02	0.07	0	0.03	0	0.01	0	0.04	0	0	0	0.01	0	0	0	0	0
ENSMMUG00000001072	0	0.01	0	0.01	0.01	0.01	0.01	0	0	0.04	0	0.02	0	0	0	0	0	0	0.01	0	0	0.02	0	0.04	0.01	0	0	0.03	0.05	0	0.04	0	0.04	0	0.01	0	0.07	0.02	0	0.05	0	0	0.01	0	0	0.01	0	0.01	0.03
ENSMMUG00000001073	0.05	0.01	0	0.03	0	0	0	0	0	0	0	0	0	0	0	0.02	0.01	0	0.01	0	0	0	0	0	0	0	0	0	0	0	0	0	0	0	0	0.04	0	0	0	0	0	0	0	0.05	0	0.03	0	0	0
ENSMMUG00000001074	1.32	1.41	1.3	1.32	1.17	1.24	1	0.96	0.78	0.91	0.81	0.69	0.5	0.94	0.73	0.54	0.37	0.63	0.62	0.68	0.56	0.4	0.76	0.52	0.79	0.64	0.86	0.83	1.02	1.21	1.42	0.81	0.86	0.98	1.01	0.89	1.15	0.93	0.9	0.99	1.19	1.31	1.04	1.31	1.34	1.21	1.39	1.63	1.17
ENSMMUG00000001075	11	11	11.91	11.35	10.93	11.24	8.21	10.32	14.83	10.98	14.34	13.46	11.21	11.93	10.27	12.07	10.63	9.04	9.67	11.28	8.93	8.53	10.84	9.97	9.76	8.48	7.36	8.01	7.97	8.67	8.71	8.83	19.43	20.32	16.53	16.85	16.6	18.11	17.74	18.64	28.18	25.85	26.53	24.37	25.76	24.8	23.6	29.39	24.71
ENSMMUG00000001077	93.06	93.8	95.71	79.11	36.71	59.43	76.45	78.88	140.9	117.14	215.92	214.25	217.47	229.61	248.01	229.76	102.53	84.48	153.3	214.09	155.13	136.31	179.97	150.91	98.03	86.04	61.17	61.96	54.01	62.03	78.48	61.17	0.62	0.51	0.94	1.02	0.84	0.43	0.29	0.89	128.99	146.85	163.62	165.58	120.91	116.63	126.61	127.14	88.82
ENSMMUG00000001078	34.54	35.6	41.17	31.69	36.87	33.55	30.42	40.87	34.05	36.18	35.82	32.57	35.3	28.96	36.51	33.94	24.27	22.45	32.84	32.35	29.75	21.57	27.72	28.88	23.45	23.72	27.33	21.89	25.26	20.32	28.2	24.58	28.93	27.66	30.51	26.63	27.06	24.54	26.14	29.7	28.75	33.6	35.7	32.72	30.48	30.3	34.25	35.31	39.77
ENSMMUG00000001079	3.48	3.1	2.61	2.25	1.42	2.14	2.19	2.38	1.91	1.11	1.55	1.68	1.72	3.13	3.07	2.29	1.57	1.81	1.43	3.52	1.44	1.67	2.06	1.53	1.55	2.09	2.02	2.4	3.32	3.24	2.62	2.79	22.9	27.28	22.21	20.77	22.21	21.35	21.08	23.37	8.15	9.05	6.28	5.91	8.53	9.57	8.98	7.9	5.2
ENSMMUG00000001081	0.04	0.05	0.09	0	0.02	0.06	0.01	0.07	0.01	0.01	0	0.06	0.05	0.04	0.03	0	0.02	0.03	0	0.01	0.03	0.07	0	0.01	0.02	0	0	0.02	0.04	0.09	0.12	0	0.02	0	0.02	0.01	0	0.01	0	0	0	0	0.04	0.02	0	0	0.01	0	0.01
ENSMMUG00000001083	0.92	0.84	0.53	0.45	0.41	0.79	0.61	0.62	0.75	0.85	0.46	0.5	0.37	0.31	0.65	0.31	0.34	0.45	0.49	0.5	0.32	0.39	0.31	0.58	0.71	0.7	0.57	0.61	0.29	0.77	0.72	0.51	0.91	1.39	0.94	1.01	0.46	1.02	1.08	0.62	0.71	0.9	1.61	0.96	0.55	0.76	0.7	0.65	0.77
ENSMMUG00000001084	1.37	1.35	1.48	1.44	1.43	1.73	1.49	1.54	0.95	1.14	0.96	1.25	1.17	1.17	1.17	1.18	0.99	1.03	1.22	1.17	0.72	0.84	0.95	1.24	1.04	1.04	1.15	1.43	1.12	0.93	1.39	1.16	4.34	4.5	5.02	4.22	3.4	3.65	4.22	3.6	3.17	3.26	3.49	2.92	3.03	2.75	3.61	3.1	1.99
ENSMMUG00000001087	0	0	0	0	0	0	0	0	0	0	0	0	0	0	0	0	0	0	0	0	0	0	0	0	0	0	0	0	0	0	0	0	0	0	0	0	0	0	0	0	0	0	0	0	0	0	0	0	0
ENSMMUG00000001088	0.59	0.64	0.73	0.36	0.13	0.27	0.25	0.33	0.81	1.03	0.92	0.74	0.41	0.62	0.59	0.66	1.15	1.09	0.64	0.45	0.54	0.49	0.36	0.44	1.27	1.14	0.67	0.82	0.29	0.45	0.1	0.25	38.64	41.35	29.28	42.63	29.53	28.48	31.5	29.73	3.81	4.36	2.32	2.69	2.32	2.95	2.16	2.39	4.49
ENSMMUG00000001090	5.1	4.58	4.33	6.07	5.71	5.39	4.24	4.93	2.97	2.28	2.02	2.11	2.19	2.62	2.52	2.81	1.73	1.8	1.67	2.79	2.07	1.97	1.98	1.68	1.96	2.13	1.78	2.18	1.98	2.07	2.81	1.81	9.67	11.62	7.24	9.74	9.79	10.01	10.18	9.19	5.41	5.26	2.19	2.45	1.93	3.19	1.99	2.62	4.3
ENSMMUG00000001091	8.9	8.95	10.44	9.23	9.31	9.56	9.11	9.12	9.21	11.41	11.25	10.52	9.51	10.11	10.85	10.69	10.93	10.7	8.85	9.54	8.55	10.19	9.28	9.12	10.36	12.07	10.03	9.63	9.38	8.89	9.62	9.82	90.27	106.76	83.9	88.26	89.28	104.75	88.62	93.65	28.84	28.79	27.86	28.64	29.99	30.49	30.63	30.51	26.51
ENSMMUG00000001092	2.32	1.88	2.02	1.92	2.79	3.39	2.32	2.87	2.32	2.47	2.86	2.27	2.81	4.22	3.22	3.27	1.78	1.45	2.1	1.91	1.97	2.74	3.42	2.12	1.48	1.18	1.54	1.56	2.16	1.96	2.22	1.34	20.45	21.84	16.82	20.51	17.53	23.2	17.73	21.21	3.48	3.26	4.11	3.66	3.75	5.41	4.68	4.48	2.82
ENSMMUG00000001093	0	0	0	0	0	0.03	0	0	0	0	0	0	0	0	0	0	0	0	0	0	0	0	0	0	0	0	0	0	0	0	0	0	0	0	0	0	0	0.05	0	0	0	0.2	0	0	0	0	0	0	0
ENSMMUG00000001094	3.18	2.16	1.64	1.49	1.04	1.02	1.01	1.38	2.09	1.65	4.09	3.46	6.58	4.05	9.13	5.95	2.44	1.07	2.02	0.72	3.48	2.09	4.18	2.34	1.12	1.02	1.44	1.38	1.49	1.46	1.52	1.05	0.54	0.69	0.48	0.43	0.5	0.64	0.53	0.35	3.21	2.38	2.14	1.99	2.67	2.18	4.53	1.93	1.41
ENSMMUG00000001095	1.21	1.43	1.39	1.23	1.42	1.46	1.13	1.2	0.94	0.96	1.13	0.9	1.27	1.13	0.77	0.89	1.15	1.08	1.05	0.97	0.81	1.04	0.9	0.84	1.03	1.05	1.22	1.36	1.2	1.38	1.02	1.15	2.07	2.65	2.31	2.73	2.73	3.36	2.38	2.66	2.69	2.66	2.11	2.26	2.18	2.61	1.83	2.4	1.96
ENSMMUG00000001096	4.56	4.71	4.79	4.61	4.61	5.14	4.62	5.34	4.68	5.28	4.32	4.99	4.72	4.6	5.36	4.22	3.62	3.38	4.91	4.47	4.57	4.59	3.62	4.96	4.78	4.14	3.39	4.04	2.92	3.14	4.53	3.99	23.44	22.1	33.32	24.24	22.71	20.49	23.21	20.83	15.01	15.08	17.72	14.89	13.07	14.84	14.92	13.75	10.65
ENSMMUG00000001097	8.4	7.69	9.96	8.34	5.96	6.31	8.16	8.08	7.79	5.69	9.37	9.4	7.88	9.66	11.46	8.57	7.3	7.3	8.92	8.04	6.58	8.39	13.17	11.13	9.2	7.24	13.28	11.55	9.51	13.17	10.78	14.15	6.05	5.49	6.37	8.15	6.6	7.5	7.72	8.8	9.41	8.08	12.94	14.42	10.57	10.82	15.02	11.55	10.04
ENSMMUG00000001098	4.05	4.37	5.61	4.12	6.16	5.52	4	4.11	4.24	4.69	4.87	4.9	4.24	4.35	4.64	4.28	3.98	3.92	4.63	4.16	3.97	3.75	3.88	4.1	4.01	3.78	3.7	3.55	3.79	3.23	3.82	2.4	10.31	11.08	10.23	10.78	11.3	9.39	9.38	10.13	11.67	13.95	11.92	11.07	11	9.79	10.61	10.51	11.07
ENSMMUG00000001099	3.7	3.82	4.4	4.22	5.18	5.47	5.24	4.58	3.35	3.46	2.76	2.33	2.13	2.2	2.58	2.49	2.71	2.01	2.3	2.13	1.99	2.39	1.69	2.04	2.39	2.96	3.22	2.45	3.5	3.49	3.86	3.69	0.28	0.18	0.47	0.31	0.31	0.19	0.4	0.38	2.2	2.01	2.08	1.73	2.67	2.22	2.89	2.36	2.19
ENSMMUG00000001100	4.8	4.81	4.99	3.92	3.83	4.41	2.64	3.88	3.69	2.95	3.32	3.31	2.58	2.34	2.17	2.57	2.4	2.02	1.91	2.61	2.28	2.25	1.65	2.26	3.13	4.19	2.98	2.4	3.1	3.01	2.8	1.8	10.44	11.21	9.04	10.03	9.25	8.55	9.55	9.7	8.96	11.79	11.37	9.11	8.93	8.94	8.37	8.59	8.49
ENSMMUG00000001102	0.98	1.34	1.94	1.33	1.25	0.9	1.21	1.33	0.65	0.51	0.81	1.02	0.71	0.54	0.57	0.88	0.31	0.44	0.63	0.76	0.51	0.66	0.16	0.39	0.74	0.87	1.41	1.03	1.05	1.99	1.31	1.51	0.41	0.44	0.93	0.25	0.69	0.47	0.5	0.75	1.49	1.15	0.99	0.72	0.51	1.05	0.62	1.01	1.22
ENSMMUG00000001103	0	0	0	0	0	0	0	0	0	0	0	0	0	0	0	0	0	0	0	0	0	0	0	0	0	0	0	0	0	0	0	0	0.14	0.09	0.13	0.09	0.09	0.07	0.04	0.07	0.07	0.04	0.02	0.02	0.03	0.07	0.12	0.11	0.04
ENSMMUG00000001105	0	0	0	0	0	0	0	0	0	0	0	0	0	0	0	0	0	0	0	0	0	0	0	0	0	0	0	0	0	0	0	0	4.62	2.58	4.92	4.16	4.78	4.19	4.25	5.2	6.52	5.65	7.88	5.79	5.44	3.37	7.02	6.83	13.13
ENSMMUG00000001106	2.23	2.74	2.72	3.11	2.93	3.78	2.94	3.41	2.25	2.17	2.59	3.57	2.42	3.13	2.82	3.11	1.64	1.65	2.42	2.33	1.76	2.71	1.68	1.99	2.03	2.45	1.8	2.05	1.5	2.47	2.69	2.19	3.25	3.72	2.9	3.65	3.54	3.19	3.1	3.88	2.65	3.48	4.76	3.73	4.04	3.29	4.39	4.67	2.62
ENSMMUG00000001107	0.25	0.25	0.32	0.31	0.37	0.26	0.9	0.72	0.09	0.19	0.25	0.2	0.34	0.39	0.42	0.43	0.16	0.18	0.16	0.3	0.35	0.42	0.56	0.44	0.19	0.28	0.48	0.43	0.85	0.56	1.04	0.86	0.4	0.18	0.17	0.23	0.27	0.32	0.49	0.47	0.17	0.17	0.24	0.22	0.38	0.37	0.61	0.6	0.15
ENSMMUG00000001108	0.13	0.18	0.35	0.1	0.17	0.19	0.1	0.17	0.94	0.92	1.06	1.07	0.99	1.07	1.02	1.08	0.7	0.45	0.62	0.74	0.49	0.84	0.98	0.82	0.74	0.42	0.27	0.34	0.14	0.38	0.36	0.2	1.54	1.19	0.97	1.35	1	1.09	0.92	0.83	13.74	14.6	11.28	10.31	8.2	11.28	9.25	10.53	5.92
ENSMMUG00000001110	3.54	3.34	4.91	3.39	4.32	4.72	3.78	3.02	6.32	6.75	6.71	5.4	6.56	8.57	6.22	4.6	4.53	4.41	3.89	4.77	4.9	4.96	5.28	2.95	3.37	4.24	4.5	3.15	4.15	5.64	3.88	3.82	12.92	13.31	12.03	12.17	10.55	12.05	10.89	10.89	16.14	15.55	10.73	11.53	11.57	11.88	11.52	10.14	14.79
ENSMMUG00000001111	2.7	2.62	2.59	2.4	1.79	1.91	2.23	1.73	4.21	3.16	4.51	4.78	5.69	5.84	7.02	5.83	4.24	3.17	3.58	5.29	4.08	5.73	6.73	5.26	2.65	2.84	2.45	2.3	2.68	4.2	2.29	2.15	2.11	2.14	1.64	1.93	1.95	2.12	1.96	1.94	4.68	3.48	3.7	4.41	4.99	6.62	4.8	4.86	3.28
ENSMMUG00000001112	0	0.01	0	0	0.03	0	0.04	0.01	0	0	0	0	0	0	0	0	0	0	0.06	0.01	0	0	0.01	0.07	0.03	0	0.02	0.04	0	0.02	0	0	0.02	0.01	0.01	0.04	0	0.03	0.02	0.02	0.05	0	0.01	0.01	0	0	0.04	0.01	0.04
ENSMMUG00000001114	0	0	0.02	0.03	0.01	0.02	0	0.01	0	0	0.02	0	0.01	0	0.03	0	0	0	0.03	0.03	0	0	0.03	0	0.03	0.02	0	0.02	0.07	0	0.06	0	173.76	144.86	194.31	166.01	174.23	150.46	171.94	184.36	82.85	110.51	126.06	94.86	113.3	99.19	109.79	122.48	68.32
ENSMMUG00000001116	0	0	0	0	0	0	0	0	0	0	0	0	0	0	0	0	0	0	0	0	0	0	0	0	0	0	0	0	0	0	0	0	6.86	6.82	7.32	5.91	7.73	7.56	7.67	8.16	4.85	5.83	5.57	5.24	5.68	6.76	6.53	5.82	3.5
ENSMMUG00000001118	4.52	3.95	4.12	4.1	5.62	5.39	4.09	5.35	3.93	5.19	4.31	4.19	4.09	3.85	4	3.95	3.43	3.06	3.47	3.83	2.83	2.51	3.02	3.3	3.38	3.12	3.01	3.19	2.87	3.38	3.6	2.52	8.35	9.28	8.49	8.53	7.34	6.78	6.89	7.48	6.51	8.05	6.89	6.86	6.25	7.19	6.63	6.18	6.6
ENSMMUG00000001119	0	0.02	0.02	0.01	0.02	0.02	0.02	0.05	0	0.1	0.1	0.04	0.06	0.05	0	0.04	0.01	0.05	0.05	0.01	0.03	0.06	0.12	0.06	0	0	0.04	0	0	0	0	0.03	0.03	0.03	0	0.01	0	0	0	0.01	0.01	0.08	0.05	0.05	0.12	0.04	0.02	0.06	0.01
ENSMMUG00000001120	37.41	46.51	44.11	46.92	47	54.5	42.1	53.41	24.07	31.25	40.6	34.15	36.94	36.77	37.22	38.68	14.53	15.46	19.35	24.38	22.04	19.3	29.03	19.01	14.39	14.97	13.38	26.03	26.44	22.28	25.58	20.38	221.52	180.28	182.83	179.61	113.9	133.29	114.09	119.84	49.97	49.89	47.35	54.62	44.18	55.86	46.48	53.1	93.09
ENSMMUG00000001121	0	0	0	0	0	0	0	0	0	0	0	0	0	0	0	0	0	0	0	0	0	0	0	0	0	0	0	0	0	0	0	0	2.31	2.28	1.71	2.3	2.27	3.47	2.84	2.84	2.11	2.24	2.64	2.38	2.17	2.47	2.16	2.48	2.38
ENSMMUG00000001122	0	0	0	0	0	0	0	0	0	0	0	0	0	0	0	0	0	0	0	0	0	0	0	0	0	0	0	0	0	0	0	0	4.06	4.18	2.91	4.06	4.13	4.3	4.24	3.99	3.22	2.38	2.93	2.99	3.31	2.87	3.11	2.92	3.14
ENSMMUG00000001123	0	0	0	0	0	0	0	0	0	0	0	0	0	0	0	0	0	0	0	0	0	0	0	0	0	0	0	0	0	0	0	0	1.47	1.69	1.51	1.77	1.66	2.23	1.89	1.68	0.5	0.7	0.58	0.77	1.07	1.02	0.91	0.81	0.44
ENSMMUG00000001124	0.08	0.04	0	0.02	0.02	0.01	0.01	0.03	0.02	0.04	0.06	0.03	0.05	0.05	0.16	0.05	0.1	0.04	0.02	0.13	0.04	0.03	0.1	0.03	0.02	0.05	0.01	0.05	0.02	0.03	0.05	0.06	0.3	0.36	0.16	0.26	0.15	0.05	0.13	0.1	0.07	0.02	0.02	0.11	0.02	0.04	0.14	0.07	0.11
ENSMMUG00000001125	2.07	2.11	2.1	1.97	2.55	1.93	1.8	2.52	1.8	2.06	2.26	2.01	2.33	2.17	2.28	2.33	1.86	1.68	2.04	1.99	1.86	1.79	1.45	2.42	1.46	1.66	2.34	1.82	2.02	2.05	1.93	2.11	3.97	4.96	3.85	4.33	4.23	5.25	4.78	5.44	2.78	3.27	3.21	3.31	3.23	2.51	3.68	3.68	2.75
ENSMMUG00000001126	5.21	4.99	5.51	5.26	5.73	6.02	4.93	5.61	3.69	4.49	2.74	3.76	3.45	3.2	3.59	4.04	3.25	3.82	4.28	4.2	3.16	3.41	2.34	3.38	4.24	5.17	4.78	4.43	2.71	4.17	5.09	3.73	13.35	14.39	13.14	13.3	10.14	9.89	10.7	12.25	5.62	7.46	6.95	7.3	6.21	6.45	6.45	6.59	6.11
ENSMMUG00000001127	0	0	0	0	0	0	0	0	0	0	0	0	0	0	0	0	0	0	0	0	0	0	0	0	0	0	0	0	0	0	0	0	42.45	30.7	22.27	29.74	34.1	31.23	20.7	21.2	1.02	0.88	1.3	1.29	2.22	1.72	1.34	1.74	1.02
ENSMMUG00000001128	1.22	1.27	0.76	0.9	0.59	0.6	1.06	0.65	0.27	0.19	0.22	0.14	0.23	0.25	0.13	0.21	0.26	0.13	0.26	0.39	0.24	0.13	0.36	0.21	1.36	1.08	2.86	1.59	2.2	2.74	1.29	1.78	0.65	0.62	0.62	0.62	0.5	1.03	0.77	0.69	0.26	0.23	0.46	0.18	0.23	0.16	0.49	0.34	0.17
ENSMMUG00000001129	8.39	9.18	10.25	8.26	8.57	8.1	6.34	8.42	8.9	7.11	10.47	9.6	13.57	11.79	11.19	12.67	7.41	6.02	8.26	10.4	9.77	7.04	9.75	9.02	6.61	6.9	7.47	8.94	10.17	9.77	8.29	10.25	16.7	21.18	16.29	20.1	21.37	24.64	20.05	20.37	11.85	11.06	11.89	12.56	13.87	11.93	13.02	12.88	10.7
ENSMMUG00000001130	1.1	1.48	1.1	1.12	1.76	1.49	1.4	1.73	1.09	1.26	0.88	1.2	1.46	1.2	1.19	1.28	0.62	0.67	0.32	1.01	0.62	0.87	0.69	0.99	1.09	0.81	1.13	1.5	1.49	1.92	1.67	1.72	0.1	0.25	0.42	0.23	0.4	0.26	0.19	0.32	9.59	10.62	6.9	6.82	8.03	7.48	5.88	8.31	5.33
ENSMMUG00000001131	10.71	9.52	14.12	8.99	7.87	9.88	6.9	8.38	14.34	12.38	20.82	13.44	18.46	20.81	17.03	17	14.91	11.62	14.25	12.78	15.85	16.4	16.31	12.93	11.56	10.48	15.58	9.34	13.44	17.4	11.42	11.05	16.16	14.15	17.36	14.57	17.04	16.38	13.96	16.55	16.06	12.39	17.75	12.97	15.97	19.16	14.28	17.29	17.12
ENSMMUG00000001132	0	0	0	0	0	0	0	0	0	0	0	0	0	0	0	0	0	0	0	0	0	0	0	0	0	0	0	0	0	0	0	0	0.42	0.21	0.5	0.35	0.46	0.37	0.41	0.51	0.4	0.36	0.56	0.37	0.4	0.71	0.98	0.9	0.22
ENSMMUG00000001133	5.94	5.05	6.13	6.06	5.74	8.49	4.05	6.26	3.82	3.88	4.81	5.01	3.42	5.23	4.71	4.79	2.98	2.45	3.22	3.79	3.98	3.13	3.29	3	2.83	2.97	6.82	3.98	3.25	4.38	2.83	5.29	3.53	1.86	3.51	3.54	2.2	2.34	2.9	1.91	1.87	2.92	2.66	2.19	2.74	3.04	3.38	1.83	2.84
ENSMMUG00000001134	0	0	0	0	0	0	0	0	0	0	0	0	0	0	0	0	0	0	0	0	0	0	0	0	0	0	0	0	0	0	0	0	0.79	0.38	2.35	1.51	2.26	2.53	2.54	2.43	0.23	0.08	0.31	0.31	1.04	1	1.7	2.92	0.22
ENSMMUG00000001136	0.03	0	0.01	0	0.05	0.01	0.01	0	0.12	0.05	0	0.1	0.09	0	0	0	0.04	0	0.08	0	0.05	0.04	0.01	0.03	0.05	0.09	0.16	0.1	0.02	0.1	0	0.03	0.08	0.12	0.09	0.12	0.17	0.15	0.09	0.11	0.1	0	0.03	0.03	0	0.06	0.02	0	0.04
ENSMMUG00000001137	2.6	2.57	2.45	2.71	3.53	3.11	3.08	4.29	1.72	2.11	2.67	2.17	3.1	2.65	2.99	2.53	1.38	2	2.31	2.63	3.69	2.27	2.52	3.21	1.84	1.86	1.85	2.11	2.21	2	2.81	2.22	4.26	2.97	5.36	3.99	5.35	5.42	4.64	6.08	4.75	5.09	7.81	6.17	7.84	8.88	10	9.66	4.72
ENSMMUG00000001138	9.33	8.95	10.42	10.22	9.47	10.71	9.41	10.84	6.89	9.97	10.1	9.11	9.21	9.58	10.68	10.89	4.18	4.97	6.86	6.8	8.32	5.54	9.25	7.5	4.53	3.9	4.86	4.79	7.12	5.17	8.39	6.77	8.37	9.53	10.13	10.28	10.97	13.91	13.25	11.52	4.68	5.92	8.09	7.48	6.17	7.41	7.24	8.41	6.21
ENSMMUG00000001139	5.17	4.72	8.16	5.22	5	4.44	4.07	4.7	14.24	8.47	13.07	14.71	12.59	12.99	11.61	12.03	13.63	10.59	11.34	13.32	12.79	12.96	14.89	12.64	11.83	7.73	7.09	6.19	8.09	9.22	9.13	7.8	13.18	11.79	12.35	14.79	17.76	22.82	18.19	16.03	21.19	15.6	18.87	22.6	20.6	21.45	19.91	21.52	14.28
ENSMMUG00000001140	0	0	0	0	0	0	0	0	0	0	0	0	0	0	0	0	0	0	0	0	0	0	0	0	0	0	0	0	0.06	0	0	0	0	0	0	0	0	0	0	0	0	0	0	0	0	0	0	0	0
ENSMMUG00000001141	0.2	0.17	0.34	0.22	0.2	0.22	0.26	0.31	0.22	0.13	0.32	0.24	0.31	0.3	0.29	0.32	0.19	0.16	0.28	0.3	0.23	0.16	0.17	0.25	0.38	0.24	0.4	0.5	0.48	0.58	0.38	0.58	0.83	1.08	0.81	0.9	0.99	0.65	0.93	1.12	1.29	1.07	1.49	0.91	1.92	2.36	1.79	1.92	1.03
ENSMMUG00000001142	0	0	0.03	0	0.01	0.02	0.01	0.01	0.02	0.01	0.03	0.02	0.01	0.01	0.01	0.02	0.02	0.01	0.01	0	0	0.01	0	0	0	0.01	0.05	0	0	0	0.01	0.02	0.02	0	0	0.02	0.02	0.02	0.02	0.01	0	0.01	0.01	0.01	0.01	0.03	0.01	0.02	0
ENSMMUG00000001143	0.4	0.53	0.2	0.2	0.03	0.13	0.05	0.06	0.3	0.19	0.32	0.05	0.04	0.12	0.22	0.27	0.1	0.01	0.04	0.03	0	0.13	0.04	0.02	0.23	0.4	0.55	0.24	0.32	0.59	0.11	0.44	4.68	4.77	4.34	5.48	8.18	9.36	6.02	7	0.1	0.01	0.04	0	0	0.01	0	0.02	0.06
ENSMMUG00000001144	0	0	0	0	0	0	0	0	0	0	0	0	0	0	0	0	0	0	0	0	0.01	0.06	0	0	0	0	0	0	0	0	0	0	0	0	0.07	0	0	0.04	0	0	0	0	0	0.05	0	0	0	0	0
ENSMMUG00000001145	0.29	0.46	0.37	0.13	0.28	0.18	0.33	0.26	0.3	0.23	0.22	0.21	0.45	0.51	0.33	0.29	0.23	0.2	0.24	0.29	0.23	0.29	0.29	0.21	0.46	0.39	0.39	0.23	0.19	0.34	0.36	0.28	0.7	0.55	0.3	0.36	0.4	0.22	0.33	0.56	0.51	0.53	0.75	0.5	0.48	0.41	0.7	0.46	0.46
ENSMMUG00000001147	2.76	3.14	3.15	3.22	2.95	3.57	2.47	3.56	3.34	3.7	3.67	3.1	3.82	3.98	3.36	4.27	2.69	1.95	3.22	2.87	2.83	2.79	3.81	3.37	2.73	2.33	2.63	2.84	2.72	2.7	2.34	2.68	8.78	8.56	7.61	9.44	11.25	9.74	8.75	9.06	7.08	7.51	8.35	7.84	7.77	7.84	7.1	7.82	6.04
ENSMMUG00000001149	8.61	6.68	8.32	7.19	6.26	6.36	5.94	5.97	8.1	5.08	7.12	6.5	6.37	5.68	6.12	5.81	6.2	5.72	6.46	6.2	6.82	5.02	5.75	5.76	6.24	5.63	7.4	5.42	6.12	6.24	6.25	5.06	11.37	10.35	9.07	10.5	12.97	9.58	9.62	9.99	9.39	10.14	10.91	9.06	10.94	9.88	9.67	8.05	9.23
ENSMMUG00000001150	1.32	1.67	2.7	1.74	1.62	1.16	1.31	1.78	2.69	3.23	3.43	2.39	2.37	3.13	2.72	3.22	1.22	1.08	1.7	1.9	1.34	0.98	1.16	2.22	1.14	1.62	2.1	1.29	0.76	1.44	1.21	1.24	14.16	17.75	21.29	17.39	14.13	14.68	12.5	15.11	13.42	21.36	18.92	15.67	12.35	18	15.05	15.16	10.5
ENSMMUG00000001151	5.22	5.25	7.82	6.58	5.76	6.91	5.79	5.83	4.52	4.05	4.54	4.95	3.82	4.65	4.69	4.04	4.21	4.34	5.51	5.33	4.37	5.75	5.58	4.84	7.11	8.68	12.33	9.98	7.76	11.38	8.66	10.94	34.52	33.44	35.31	31.02	29.16	27.4	31	33.25	6.06	7.88	10.06	8.48	6.78	7.47	9.15	8.13	4.65
ENSMMUG00000001152	0.34	0.29	0.46	0.29	0.29	0.37	0.4	0.43	0.33	0.18	0.32	0.32	0.27	0.35	0.22	0.38	0.34	0.17	0.55	0.28	0.12	0.33	0.23	0.47	0.34	0.44	0.46	0.66	0.36	0.3	0.31	0.44	0.23	0.21	0.31	0.28	0.28	0.14	0.22	0.36	0.22	0.23	0.32	0.32	0.21	0.16	0.48	0.2	0.3
ENSMMUG00000001153	1.16	0.78	0.66	1.49	0.99	1.06	0.63	1.22	0.66	0.71	1.42	0.89	1.47	1.06	0.94	1.58	0.57	0.43	0.98	1.13	0.43	0.95	0.76	1.21	0.92	0.78	0.58	1.16	0.95	0.98	0.96	1.49	6.39	3.46	7.1	4.03	5.18	6.95	8.69	9.66	8.6	8.08	6.89	4.98	5.28	7.03	4.39	6.24	2.79
ENSMMUG00000001154	14.17	11.8	15.88	13.23	8.87	6.87	8.54	11.76	15.29	10.31	22.49	16.94	18.89	17.97	18.9	18.5	13.29	10.67	13.36	14.6	15.55	14.1	13.91	14.58	10.9	9.98	24.11	13.52	17.7	18.11	12.23	18.51	9.78	8.07	10.45	10.11	9.66	10.75	9.34	12.28	14.76	9.75	16.08	14.73	16.55	12.39	15.19	16.91	16.05
ENSMMUG00000001155	0.39	0.38	0.66	0.52	0.37	0.33	0.56	0.59	0.56	0.38	0.7	0.64	0.5	0.37	0.67	0.55	0.38	0.36	0.69	0.79	0.58	0.53	0.74	0.34	0.53	0.33	0.67	0.67	0.61	0.66	0.83	0.83	0.23	0.34	0.39	0.35	0.41	0.36	0.35	0.35	0.48	0.28	0.64	0.51	0.43	0.53	0.57	0.57	0.53
ENSMMUG00000001156	0.22	0.24	0.23	0.22	0.22	0.29	0.22	0.18	0.29	0.24	0.1	0.24	0.26	0.17	0.22	0.16	0.32	0.19	0.23	0.15	0.21	0.37	0.17	0.18	0.24	0.18	0.18	0.22	0.21	0.26	0.25	0.24	2.09	1.43	2.11	1.6	1.45	2.59	1.79	2.4	3.26	2.02	2.41	1.78	1.97	2.1	1.97	1.96	2.45
ENSMMUG00000001157	12.31	12.24	13.25	11.68	11.05	10.72	10.93	12.35	11.46	10.42	12.13	11.82	10.41	9.28	11.22	10.32	9.5	9.76	11.66	10.92	10.07	8.96	10.29	10.03	9.26	9.72	13.06	11.5	10.21	9.19	10.8	11.12	13.17	13.94	13.85	13.73	15.3	12.07	13.71	13.86	10.68	11.8	13.2	12.15	10.68	9.83	11.46	12.18	11.49
ENSMMUG00000001158	1.83	1.74	2.11	1.77	1.85	2.08	1.45	1.89	1.63	2.08	1.86	1.93	1.65	2.19	1.81	2.05	1.01	1.07	1.88	1.57	1.14	1.38	1	1.57	1.09	1.29	1.25	1.34	0.89	1.2	1.42	1.37	2.01	2.38	2.99	2.13	2.6	2.51	2.54	3.53	1.48	2.47	2.35	2.21	2.45	2.03	2.26	2.86	2.16
ENSMMUG00000001160	10.01	9.62	11.26	10.22	8.45	9.25	7.69	8.22	12.84	8.63	13.51	13.91	14.25	13.71	14.29	13.55	12.54	11.24	11.38	10.91	11.45	12.8	13.6	10.61	12.84	11.28	10.87	10.04	11.59	15.6	11.98	12.12	32.78	36.37	34.94	36.64	38.02	48.58	43.24	44.2	20.62	15.07	16.37	16.68	18.58	15.51	17.22	16.37	17.24
ENSMMUG00000001161	4.45	4.2	4.63	3.37	3.4	3.41	4.25	3.39	4.86	2.8	4.53	3.94	3.24	3.31	4.16	3.51	3.42	3.01	3.37	4.04	2.85	4.12	2.31	3.01	3.81	3.7	3.64	3.01	4.08	4.48	2.97	3.74	24.27	25.63	28.54	25.15	25.53	22.4	24.34	21.06	28.94	33.83	26.55	22.76	27.19	27.9	26.06	20.88	20.93
ENSMMUG00000001162	1.4	1.53	1.97	2.15	2.97	2.71	2.3	2.15	2.45	3.07	3.08	3.01	2.77	3.82	3.38	3.4	1.82	1.47	2.47	1.82	1.77	2.21	2.22	1.69	1.42	1.75	1.33	1.36	1.48	1.82	2.81	0.79	62.56	69.64	96.1	70.53	69.79	75.94	85.99	82.78	26.4	22.82	28.52	18.63	17.91	25.54	25.19	18.25	14.6
ENSMMUG00000001163	7.82	8.04	11.71	9.06	7.5	8.18	5.47	8.77	4.48	4.95	5.11	6.32	5.33	4.6	5.97	6.82	1.54	1.71	2.58	3.47	2.29	2.27	1.76	1.96	4.46	5.04	5.47	6.23	5.38	4.1	4.77	5.71	70.09	74.55	86.84	83.53	54.44	51.93	65.02	56.83	9.92	13.19	13.23	20.46	9.27	13.24	14.66	10.98	23.94
ENSMMUG00000001165	0	0	0	0	0	0	0	0	0	0	0	0	0	0	0	0	0	0	0	0	0	0	0	0	0	0	0	0	0	0	0	0	0.05	0.27	0.14	0.19	0.58	0.13	0.27	0.13	0.08	0.21	0.08	0.17	0.15	0.06	0.17	0.33	0.38
ENSMMUG00000001166	0.76	0.46	0.67	0.43	0.27	0.31	0.36	0.49	0.99	0.51	0.69	0.87	0.64	0.61	0.75	0.61	0.34	0.71	0.62	0.67	0.49	0.49	0.82	0.48	0.63	0.39	0.71	0.77	0.7	1.41	0.7	1.1	0.45	0.3	0.24	0.25	0.75	0.48	0.86	0.44	0.92	0.14	0.6	0.55	0.33	0.43	0.56	0.43	0.78
ENSMMUG00000001167	2.84	2.91	2.97	3.44	3.81	3.66	2.43	2.9	2.43	3.6	3.64	3.06	4.65	4.95	4.25	4.48	2.32	2.4	3.78	3.04	3.95	3.69	4.22	4.31	2.84	3.65	3.06	3.1	3.32	3.63	3.01	3.06	5.26	6.51	5.89	7	6.43	9.73	7.89	8.06	4.27	5.29	4.59	5.96	5.75	6.35	5.2	6.19	3.77
ENSMMUG00000001168	1.19	1.07	1.64	1.01	1.04	1.28	1.46	1.25	1.68	1.24	2.06	2.46	1.85	2.15	1.83	2.37	2.15	1.78	1.62	2.13	1.83	2.31	2.12	1.78	1.72	1.34	1.27	1.15	1.79	1.3	1.79	1.68	2.31	2.76	2.25	2.66	2.75	2.93	2.68	3.12	9.27	11.59	9.59	7.96	10.25	11.14	8.12	9.32	5.72
ENSMMUG00000001169	6.49	5.63	5.98	6.4	5.76	5.96	6.51	5.74	7.92	7	6.56	7.41	6.34	5.99	7.43	6.32	8.02	7.31	6.53	6.62	6.59	6.43	6.05	6.11	7.26	6.61	5.91	4.89	5.62	4.56	5.51	5.35	19.72	17.24	23.14	18.58	17.91	16.6	18.76	18.07	25.65	29.24	22.78	19.32	20.43	20.45	19.73	19.23	18.21
ENSMMUG00000001171	0.46	0.28	0.17	0.2	0.15	0.19	0.16	0.12	0.27	0.17	0.2	0.3	0.11	0.06	0.14	0.19	0.38	0.41	0.21	0.29	0.06	0.21	0.17	0.1	0.16	0.28	0.3	0.46	0.22	0.46	0.21	0.18	1.68	1.14	0.24	0.53	0.16	0.26	0.14	0.28	0.52	0.6	0.43	0.49	0.4	0.16	0.16	0.26	0.69
ENSMMUG00000001172	0.33	0.41	0.31	0.13	0.23	0.3	0.24	0.48	0.26	0.25	0.13	0.08	0.23	0.19	0.19	0.41	0.11	0.23	0.29	0.15	0.15	0.19	0.26	0.34	0.31	0.26	0.22	0.18	0.11	0.19	0.06	0.25	0.48	0.59	0.49	0.28	0.44	0.34	0.31	0.48	0.28	0.47	0.43	0.2	0.19	0.16	0.3	0.73	0.55
ENSMMUG00000001174	0.19	0	0.08	0.04	0.04	0	0.06	0.17	0.08	0.13	0.07	0	0.1	0.09	0.12	0.15	0.14	0	0.08	0.04	0.11	0.11	0.06	0.18	0	0.16	0.1	0	0	0.07	0	0	0.4	0.39	0.29	0.44	0.3	0.25	0.27	0.19	0.57	0.53	0.28	0.16	0.34	0.31	0.28	0.88	1.18
ENSMMUG00000001175	0.19	0.17	0.15	0.07	0.03	0.08	0.13	0.16	0.07	0.27	0	0.09	0.17	0	0.07	0.2	0.03	0.08	0	0.07	0.09	0.2	0.08	0.35	0.14	0.21	0.35	0	0.04	0	0	0.21	1.55	1.2	0.71	1.87	0.92	0.85	0.65	1.03	0.4	1.28	0.6	1.02	0.56	0.43	0.88	0.84	1.31
ENSMMUG00000001176	12.62	13.47	15.39	13.54	11.58	15.71	14.91	17.75	7.28	7.26	10.19	10.2	8.51	12.36	12.21	12.04	6.78	6.26	12.36	10.37	8.82	11.76	10.98	13.54	10.11	11.43	17.87	14.66	11.33	16.33	15.54	16.97	13.64	14.33	19.81	14.18	14.01	15.32	15.86	19.16	8.51	9.13	14.71	12.8	11.9	16.7	17.97	15.23	7.4
ENSMMUG00000001178	1.05	0.62	1.2	0.89	0.79	0.77	0.84	0.79	1.45	0.87	1.18	1.29	1.09	1.68	1.23	0.99	0.85	0.33	0.75	1.26	0.89	0.82	1.55	0.9	0.76	0.63	0.95	1.07	1.08	1.44	1.2	1.05	0.1	0.22	0.18	0.22	0.32	0.13	0.22	0.21	0.43	0.65	0.51	0.73	0.58	0.85	0.57	0.85	1.33
ENSMMUG00000001179	80.09	71.82	114.82	68.29	48.52	49.56	52.09	60.38	149.92	93.98	180.1	161.79	148.14	159.76	158.55	142.77	157.47	127.01	136.84	134.41	129.22	148.35	159.22	164.02	176.27	149.48	137.89	133.74	106.05	141.5	109.81	142.03	50.24	49.71	72.23	64.11	90.32	109.25	84.3	80.76	539.43	462.34	596.65	566.24	579.8	509.21	669.62	541.8	328.78
ENSMMUG00000001180	17.39	17.07	18.47	16.76	18.11	17.1	13.9	17.16	17.98	19.87	21.77	20.55	24.73	26.08	23.57	22.72	17.17	15.65	17.41	19.74	20.81	18.65	24.53	20	15.85	17.18	16.49	18.04	17.47	20.21	17.79	16.16	30.03	35.49	27.05	33.15	32.86	38.29	36.48	34.7	24.77	26.09	23.54	26.58	25.28	22.45	22.48	26.11	22.57
ENSMMUG00000001181	0.3	0.39	0.18	0.28	0.31	0.76	0.66	0.48	0.19	0.37	0.28	0.27	0.31	0.34	0.26	0.22	0.17	0.16	0.39	0.33	0.13	0.37	0.28	0.22	0.24	0.21	0.36	0.24	0.16	0.44	0.35	0.18	2	2.98	2.14	2.08	0.64	2.44	3.21	1.85	0.31	0.39	0.32	0.36	0.28	0.38	0.47	0.33	0.34
ENSMMUG00000001182	2.18	2.17	2.14	2.07	2.3	2.34	1.82	2.44	1.72	1.66	1.81	1.9	1.67	2.04	1.53	1.8	1.25	1.21	1.19	1.63	1.56	1.33	1.6	1.28	1.12	1.08	1.6	2.16	2.52	2.17	2.01	2.18	9	10.35	8.61	11.58	10.93	12.11	10.4	10.42	7.35	7.08	5.39	5.75	5.17	5.61	4.93	5.65	9.45
ENSMMUG00000001183	20.82	21.97	18.69	22.72	24.28	25.29	21.81	25.69	22.91	26.37	22.41	26.43	29.51	31.12	29.31	30.21	16.51	15.2	17.88	22.12	19.85	21.48	26.95	20.75	17.38	17.71	14.42	18.42	21.69	20.92	22.25	19.65	14.55	18.63	15.75	17.69	19.86	23.18	20.82	20.68	22.96	23.56	19.48	26.74	23.11	27.98	29.16	31.73	20.76
ENSMMUG00000001185	35.99	36.18	39.83	32.97	32.44	30.02	31.46	33.25	31.99	33.27	36.01	35.82	37.31	33.66	38.59	36.93	26	26.51	31.8	33.24	31.75	27.14	29.88	32.48	31.71	29.89	35.84	29.4	26.19	27.52	32.32	30.05	58.85	60.63	61.89	57.52	59.33	53.81	52.91	59.52	46.77	54.92	61.39	55.65	51.7	53.96	60.75	52.5	42.08
ENSMMUG00000001186	1.77	1.87	2	1.7	1.94	2.04	1.87	1.95	1.72	1.86	2.29	2.03	2.13	2.3	2.05	2.07	1.48	1.35	2.21	1.83	1.86	1.8	2.54	1.94	1.49	1.7	1.77	1.31	1.71	1.76	2.04	1.56	2.86	3.45	4.03	4.13	4.2	4.52	4.23	4.24	3.06	2.98	3.63	3.32	3.34	3.45	3.62	3.44	2.64
ENSMMUG00000001187	0.89	0.51	0.46	0.28	0.11	0.08	0.51	0.33	0.31	0.71	0.55	0.41	0.21	0.37	1.5	0.66	0.4	0.23	0.22	0.3	0.06	0.07	0.57	0.17	0.58	0.55	0.62	0.77	0.32	0.99	0.74	0.5	0.1	0.03	0.01	0	0	0.01	0	0	0.18	0.1	0.09	0.03	0	0.02	0.07	0	0.31
ENSMMUG00000001190	0.03	0.07	0.04	0.05	0.04	0.07	0.07	0.07	0.06	0.1	0.06	0.06	0.05	0.15	0.11	0.06	0.15	0.06	0.05	0.07	0.06	0.11	0.1	0.12	0.16	0.13	0.07	0.14	0.03	0.22	0.12	0.03	0.18	0.22	0.11	0.17	0.17	0.25	0.15	0.18	0.28	0.35	0.2	0.19	0.11	0.21	0.22	0.14	0.48
ENSMMUG00000001191	11.47	10.84	10.29	11.8	8.53	7.17	7.85	8.12	13.4	9.23	14.5	14.01	15.05	15.64	14.26	11.87	12.2	9.85	9.53	10.58	11.06	10.51	12.35	10.88	9.54	10.09	12.98	9.96	12.22	14.91	10.4	10.79	14.68	14.44	12.92	15.98	16.18	18.14	15.62	16.13	16.3	14.08	14.33	16.22	16.53	13.95	15.45	12.21	15.83
ENSMMUG00000001192	6.05	6.18	6.91	6.47	6.75	6.73	6.21	5.89	6.95	6.17	10.57	8.79	10.02	9.48	11.49	9.78	6.23	4.56	5.63	6.98	6.05	7.27	8.96	7.04	5.41	6.22	7.73	6.05	7.08	10.27	10.14	6.13	10.24	12.87	13.25	12.85	11.77	16.92	15.84	15.22	9.26	8.8	9.47	9.71	11.39	12.29	13.17	10.87	7.49
ENSMMUG00000001193	1.18	1.07	1.28	1.43	1.49	1.25	1.38	1.52	0.89	1.15	1.01	0.94	0.88	0.83	0.9	1.08	0.73	0.65	1.18	0.9	0.95	0.63	0.75	0.84	0.78	0.76	1.19	0.93	0.86	1.22	1.13	1.05	2.6	2.31	2.53	2.57	2.6	2.46	2.78	2.65	1.82	1.95	1.79	2.03	1.86	1.43	2.2	1.9	1.84
ENSMMUG00000001194	405.14	387.95	383.84	326.58	252.81	267.11	242.32	295.51	258.3	179.21	269.16	259.72	278.78	266.75	307.11	269.04	275.41	232.47	270.92	324.37	298.62	244.94	296.57	305.33	304.97	294.61	479.57	401.67	410.74	322.54	409.13	463.66	140.28	145.84	150.27	140.31	130.97	139.23	143.94	148.65	237.74	214.95	229.32	236.33	216.78	208.53	257.33	216.65	266.16
ENSMMUG00000001195	0	0	0	0	0	0	0	0	0	0	0	0	0	0	0	0	0	0	0	0	0	0	0	0	0	0	0	0	0	0	0	0	1.73	1.22	0.93	1.17	0.54	0.98	0.5	1.24	0.19	0.14	0.1	0.22	0.17	0.72	0.23	0.27	0.09
ENSMMUG00000001196	0	0.27	0.04	0.04	0	0.15	0.02	0.12	0	0.07	0	0.03	0	0.21	0.11	0.29	0	0.39	0	0.02	0	0	0.09	0.44	0	0.23	0.03	0.03	0.03	0.14	0.04	0.23	0.1	0.09	0.05	0.3	0.07	0	0.03	0.21	0.02	0.02	0	0.16	0	0.02	0	0.07	0.05
ENSMMUG00000001197	9.47	9.16	11.02	9.46	7.58	7.81	6.85	8.55	9.88	7.4	14.19	12.71	13.72	15.04	14.19	14.19	9.24	9.17	10.51	11.68	11.76	13.15	15.07	11.94	9.14	9.18	9.96	9.82	11.06	13.32	10.41	11.73	19.61	22.34	21.76	26.67	28.84	33.62	28.71	29.12	16.76	17.04	17.54	18.64	20.06	19.1	18.43	19.25	13.01
ENSMMUG00000001198	0	0	0	0	0	0	0.12	0	0	0	0	0	0	0	0	0.05	0	0.06	0.06	0	0	0	0	0	0	0.08	0	0.05	0	0	0	0.06	0	0.04	0	0	0	0	0.05	0	0.09	0	0	0	0	0.13	0	0	0
ENSMMUG00000001199	26.25	28.25	38.24	31.47	33.03	29.97	26.84	28.77	33.57	34.08	38.56	32.8	31.77	31.02	33.71	33.06	28.62	26.29	31.3	31.74	28.11	26.2	31.12	31.07	25.81	23.41	29.31	23.26	25.49	27.45	28.78	29.2	26.04	28.17	29.3	28.41	30.69	32.24	28.88	33.21	43.41	48.94	46.21	43.67	39.08	39.2	40.37	44.06	38.23
ENSMMUG00000001200	0.16	0	0	0.05	0	0.02	0	0	0	0	0.04	0.03	0	0	0.08	0.09	0.02	0.1	0.04	0.02	0.04	0	0.04	0.11	0	0	0.06	0	0.03	0.07	0	0.08	0.12	0.1	0.07	0.02	0.09	0.05	0.09	0.14	0.05	0.11	0.01	0.01	0.07	0.05	0.02	0	0
ENSMMUG00000001201	7.17	6.92	8.16	7.79	7.88	7.73	7.14	6.97	5.69	5.53	6.6	5.83	6.89	6.57	6.13	6.17	5.17	5.3	5.82	5.75	6.48	6.75	8.2	6.76	5.21	4.73	8.23	7.36	8.18	8.32	9.77	8.48	9.08	9.99	11.12	9.45	10.42	9.89	10.18	9.6	7.73	7.99	8.73	7.52	7.63	6.98	8.71	8.04	7.7
ENSMMUG00000001203	1.21	2.04	1.9	1.35	1.04	0.88	1.45	0.86	3.43	2.51	1.57	3.52	1.43	1.88	1.45	1.77	3.51	2.36	2.19	2.54	1.59	1.54	2.03	0.99	1.05	1.15	1.29	0.67	2.1	1.42	1.32	0.93	3.18	2.7	4.01	4.36	5.47	8.5	8.53	6.85	1.75	1.26	0.72	0.89	1.89	0.84	0.74	1.45	3.83
ENSMMUG00000001204	0.02	0	0	0	0	0.02	0	0	0	0	0	0	0	0	0	0	0	0	0	0	0	0	0	0	0.02	0	0	0.03	0	0	0	0	0	0.04	0.05	0.03	0.06	0	0	0	0	0	0	0	0	0.04	0	0	0
ENSMMUG00000001205	10.05	10.16	10.01	10.18	11.61	12.79	10.83	15.03	8.55	9.5	6.86	8.68	7.4	7.43	7.2	8.59	7.12	6.85	9.67	8.25	7.33	7.03	6.01	8.22	9.25	10.08	9.26	9.95	8.32	8.6	10.39	11.35	18.11	17.83	21.09	17.58	15.62	12.81	15.39	16.17	12.48	14.82	14.6	13.07	13.47	13.22	13.76	13.91	11.59
ENSMMUG00000001206	0	0	0	0.03	0	0	0	0	0	0	0	0	0	0	0	0	0	0	0	0	0	0	0.06	0	0	0	0	0	0	0.06	0	0.07	0	0	0	0	0	0.05	0	0	0	0	0	0	0	0	0	0	0
ENSMMUG00000001207	0.01	0	0	0.01	0	0.02	0	0	0.02	0.01	0	0	0.09	0	0	0	0	0	0.01	0	0	0	0.01	0	0.01	0.03	0	0	0	0.02	0	0.02	0.07	0.04	0.01	0.02	0.01	0.03	0.01	0.02	0	0.01	0.01	0	0.02	0	0	0	0.01
ENSMMUG00000001208	0.03	0.02	0.06	0.02	0.03	0.02	0.01	0.02	0.07	0.12	0.11	0.09	0.05	0.06	0.11	0.08	0.11	0.04	0.08	0.09	0.05	0.04	0.04	0.05	0.07	0.11	0.07	0.01	0.02	0.02	0.04	0.01	0.1	0.05	0.09	0.07	0.09	0.11	0.04	0.05	0.17	0.05	0.07	0.1	0.08	0.06	0.1	0.11	0.24
ENSMMUG00000001209	1.67	1.34	1.67	1.42	1.45	1.37	1.57	1.37	1.1	0.66	1.47	0.89	1.13	0.82	0.82	1.08	0.8	0.63	1.47	0.7	1.03	0.69	1	0.87	1.01	1.36	1.4	1.17	1.08	1.49	1.33	1.25	5.02	4.34	3.88	4.57	4.85	4.19	3.62	3.97	1.34	2.56	2.41	2.44	2.53	2.27	2.83	2.07	1.85
ENSMMUG00000001210	0	0	0	0	0	0	0	0	0	0	0	0	0	0	0	0	0	0	0	0	0	0	0	0	0	0	0	0	0	0	0	0	0.26	0.5	0.22	0.19	0.19	0.15	0.25	0.36	0.01	0.08	0.05	0.04	0.06	0.07	0.14	0.08	0.08
ENSMMUG00000001211	0.12	0.06	0.05	0.08	0.03	0.05	0.06	0.05	0.08	0.07	0.2	0.07	0.19	0.24	0.19	0.2	0.03	0.08	0.08	0.03	0.09	0.24	0.29	0.05	0.04	0.04	0.05	0.01	0.04	0	0.06	0.06	0	0.02	0.03	0.04	0	0.01	0	0.04	0.1	0.03	0.2	0.19	0.03	0.09	0.06	0.03	0.02
ENSMMUG00000001212	0.4	0.69	0.67	0.62	0.64	0.79	0.27	0.62	0.55	0.53	0.34	0.59	0.48	0.75	0.42	0.58	0.28	0.39	0.34	0.53	0.48	0.53	0.31	0.57	0.68	0.63	0.56	0.68	0.66	0.48	0.47	0.51	0.73	0.65	0.28	0.6	0.54	0.72	0.47	0.52	0.38	0.44	0.67	0.66	0.62	0.6	0.5	0.53	0.28
ENSMMUG00000001213	0.07	0.13	0.1	0.02	0.1	0.08	0.05	0.07	0.02	0.03	0.02	0.02	0.01	0	0.05	0.14	0.02	0.1	0.05	0.01	0.04	0.15	0.01	0.01	0.07	0.09	0.08	0.07	0.02	0.09	0.02	0.05	0.59	0.71	1.07	0.74	0.97	0.56	0.84	0.89	0.43	1.05	1.26	1.08	1	0.95	1.07	1.46	0.56
ENSMMUG00000001214	0.1	0.18	0.08	0.13	0.09	0.06	0.05	0.03	0.12	0.06	0.13	0.07	0.04	0.04	0.06	0.07	0.09	0.07	0.03	0.08	0.01	0.07	0.07	0.05	0.06	0.05	0.09	0.15	0.08	0.14	0.06	0.23	0.52	0.36	0.4	0.31	0.2	0.3	0.34	0.31	0.15	0.29	0.18	0.19	0.29	0.28	0.2	0.17	0.17
ENSMMUG00000001216	0	0	0	0	0	0	0	0	0	0	0	0	0	0	0	0	0	0	0	0	0	0	0	0	0	0	0	0	0	0	0	0	4.09	4.84	4.1	4.05	3.05	3.67	4.73	3.87	2.76	3.52	3.7	3.06	2.46	2.15	2.69	2.92	2.9
ENSMMUG00000001217	0.94	0.7	0.8	0.58	0.23	0.35	0.24	0.34	0.38	0.32	0.62	0.48	0.51	0.37	0.67	0.35	0.78	0.46	0.82	0.91	0.65	0.36	0.47	0.23	0.86	0.88	0.56	0.37	0.66	0.33	0.44	0.56	0.76	0.59	0.57	0.48	0.73	0.31	0.31	0.58	0.87	0.79	0.87	0.43	0.78	0.78	0.9	0.38	0.94
ENSMMUG00000001218	0.02	0.03	0.03	0.02	0.02	0.04	0.02	0.01	0.01	0	0.02	0.03	0.03	0.01	0.04	0.07	0.02	0.02	0.04	0.03	0.05	0.02	0.01	0	0.02	0.01	0.03	0.01	0.05	0.03	0.02	0.02	0.01	0.03	0.04	0.04	0	0.01	0	0.01	0.05	0.03	0.01	0.04	0.05	0.01	0.02	0.01	0.06
ENSMMUG00000001219	13.93	12.9	15.48	14.45	12.93	9.92	10.33	14.46	13.82	13.33	22.73	19.31	18.94	20.45	17.9	20.16	11.87	9	14.72	16.82	14.28	12.79	19.63	17.9	10.81	8.39	11.82	11.03	11	11.19	9.64	13.63	14.89	17.02	15.78	16.51	17.86	20.35	17.49	17.34	13.87	13.85	17.99	18.64	16.77	15.76	14.08	19.22	14.66
ENSMMUG00000001220	0.02	0.01	0.17	0.15	0.01	0.05	0.04	0.04	0.06	0.02	0.17	0.19	0.08	0.11	0.05	0.08	0.07	0.09	0.13	0.12	0.06	0.11	0.04	0.07	0.16	0.01	0.14	0.15	0.07	0.12	0.07	0.08	0.12	0.03	0.1	0.26	0.07	0.15	0.02	0.09	0.07	0.04	0.19	0.15	0.07	0.18	0.01	0.05	0.11
ENSMMUG00000001221	0.34	0.23	0.3	0.47	0.57	0.6	0.33	0.36	0.46	0.33	0.28	0.24	0.28	0.26	0.19	0.3	0.2	0.22	0.29	0.19	0.23	0.23	0.23	0.15	0.28	0.48	0.47	0.33	0.26	0.52	0.24	0.17	4.47	5.45	3.25	4.44	3.97	3.87	4.37	4.09	0.27	0.53	0.24	0.41	0.39	0.37	0.37	0.45	0.34
ENSMMUG00000001223	0	0	0	0	0	0	0	0	0	0	0	0	0	0	0	0	0	0	0	0	0	0	0	0	0	0	0	0	0	0	0	0	0.07	0.07	0.07	0.05	0.02	0.02	0.05	0.04	0	0.06	0	0.02	0	0	0	0	0.08
ENSMMUG00000001224	11.16	11.06	10.14	9.97	10.14	9.71	8.88	10.34	12.22	12.36	12.96	13.84	13.51	12.44	14.02	12.79	9.59	10.7	12.73	14.13	14.34	10.98	14.68	14.15	10.29	10.1	9.87	9.54	9.92	8.81	10.2	9.2	11.61	13.23	13.39	12.51	14.12	14.08	14.43	12.02	22.52	23.01	22.06	21.02	20.71	22.36	21.64	20.66	15.77
ENSMMUG00000001225	3.68	4.58	3.84	4.49	5.07	3.74	3.76	4.6	2.79	2.48	2.17	2.44	1.89	1.92	3.09	2.06	2.43	1.93	1.66	2.73	1.9	1.28	2.43	1.69	2.9	2.57	3.75	3.47	4.45	4.05	5.96	4.92	246.78	274.36	209.65	275.39	238.9	231.46	232.51	178.09	55.62	61.86	59.08	63.15	59.79	86.48	62.08	70.06	20.23
ENSMMUG00000001226	84.01	81.41	76.69	69.15	63.65	58.68	61.99	74.15	60.02	45.95	52.81	41.68	37.76	37.63	34.53	32.46	55.36	36.08	44.28	42.22	38.44	30.79	28.72	28.82	47.35	35.65	42.64	43.79	44.45	40.06	38.24	37.04	26.99	15.72	20.86	18.01	17.67	12.99	13.4	17.45	32.66	26.75	30.48	24.36	21.13	23.35	24.84	19.57	50.2
ENSMMUG00000001228	0.09	0.12	0.11	0.08	0.02	0.05	0.05	0.03	0.15	0.16	0.2	0.16	0.19	0.25	0.17	0.1	0.11	0.1	0.05	0.1	0	0.17	0.06	0.05	0.17	0.07	0.18	0.11	0.04	0.12	0.04	0.2	2.19	2.88	1.87	2.62	2.52	2.56	2.34	1.67	1.34	1.2	0.71	0.71	0.66	0.45	0.75	0.73	0.8
ENSMMUG00000001230	0	0	0	0	0	0	0	0	0	0	0	0	0	0	0	0	0	0	0	0	0	0	0	0	0	0	0	0	0	0	0	0	0.04	0	0	0.03	0	0	0	0	0	0	0	0	0	0	0	0	0
ENSMMUG00000001232	0	0	0	0	0	0	0	0	0	0	0	0	0	0	0	0	0	0	0	0	0	0	0	0	0	0	0	0	0	0	0	0	0	0	0.18	0	0	0	0	0	0	0	0	0	0	0.15	0	0	0
ENSMMUG00000001233	2.64	3.05	2.75	2.29	2.25	2.38	2.01	2.76	2.1	1.97	2.15	2.23	1.82	1.68	2.08	2.02	1.5	1.67	2.6	2.5	1.84	1.55	1.79	2.13	1.82	1.99	2.26	2.26	1.98	1.74	2.27	2.08	2.55	2.72	3.07	2.59	2.47	2.19	2.48	2.75	3.22	3.94	3.64	3.2	3.3	3.66	3.05	3.6	3.44
ENSMMUG00000001234	0.04	0.03	0	0.03	0	0	0	0	0	0	0	0	0	0	0	0	0	0	0	0	0	0	0	0	0	0	0	0	0	0.14	0	0	0	0	0	0	0	0	0	0	0	0	0	0	0	0	0	0	0
ENSMMUG00000001235	0	0	0	0	0.01	0.02	0	0.02	0	0	0	0	0	0	0	0	0.01	0.01	0	0	0	0	0	0	0	0	0	0	0	0	0	0	0	0	0	0	0	0	0.01	0	0.01	0.02	0.04	0	0	0	0	0	0.03
ENSMMUG00000001236	0.01	0	0	0	0	0	0.01	0	0.03	0	0	0	0	0	0	0.03	0	0	0	0	0	0	0	0	0	0.02	0	0	0.04	0	0	0	0.02	0	0.02	0	0	0	0	0	0	0	0	0	0	0	0	0	0
ENSMMUG00000001238	1.26	1.4	1.43	1.36	1.47	1.6	1.52	1.52	1.71	2.28	1.72	1.84	2.25	2.21	1.89	1.95	1.3	1.42	1.49	1.62	1.21	1.52	1.65	1.48	1.4	1.15	1.17	1.36	1.18	1.62	1.57	1.26	25.41	31.29	24.34	28.25	27.14	34.67	31.16	27.54	17.9	18.08	17.2	19.24	18.73	22.53	16.37	19.99	13.74
ENSMMUG00000001239	0.97	0.43	0.37	0.4	0.97	0.98	0.98	0.98	0.78	0.51	0.49	0.44	0.88	0.87	0.84	0.32	0.82	0.41	0.74	0.62	1.01	0.78	0.4	0.58	1	0.44	1.05	0.33	0.84	0.58	0.52	0.59	3.38	3.31	3.95	2.83	2.8	3.91	3.75	3.18	2.88	2.98	1.97	1.96	3.05	4.54	2.09	2.81	1.96
ENSMMUG00000001242	0.01	0.03	0	0.02	0.03	0.03	0.01	0.02	0.03	0.04	0.04	0.02	0.02	0.03	0.03	0.02	0.03	0.01	0.04	0.02	0.01	0.04	0.01	0.01	0.01	0.02	0.02	0.01	0.02	0.01	0	0.01	0.04	0.03	0.07	0.08	0.03	0.03	0.03	0.03	0.02	0.05	0.06	0.02	0.07	0.03	0.08	0	0.03
ENSMMUG00000001243	2.34	2.01	2.43	2.34	2.31	2.65	1.78	2.36	2.06	2.1	2.34	2.69	2.33	2.83	2.87	2.92	1.52	1.39	1.87	2.23	1.8	2.55	3.13	2.21	1.91	1.57	1.75	1.46	1.61	2.02	1.98	1.81	8.5	9.77	9.28	10.17	10.86	13.37	12.42	11.14	8.24	7.3	7.83	7.76	6.45	10.35	7.58	9.27	4.41
ENSMMUG00000001244	1.11	1.14	0.83	1.04	0.76	0.84	0.85	0.82	0.9	0.87	0.89	0.95	0.63	0.69	0.47	0.91	0.66	1	0.74	0.93	0.55	0.72	0.73	0.56	0.74	1.01	0.76	0.95	0.68	0.64	0.66	0.63	9.1	7.86	9.32	7.36	9.36	7.59	9.45	8.46	2.87	2.66	2.87	2.74	3.03	2.76	2.7	2.96	2.95
ENSMMUG00000001245	5.15	5.23	5.47	5.9	6.18	6.87	4.8	5.48	4.56	4.3	4.32	4.19	4.28	3.99	3.85	4.21	3.78	3.78	3.93	4.04	3.61	3.49	3.28	3.95	4.73	4.58	6.11	4.96	3.75	5.31	5.39	4.7	14.07	16.56	16.06	16.59	15.19	16.54	14.32	16.58	8.47	9.98	9.98	8.83	7.99	8.34	8.88	9	7.07
ENSMMUG00000001246	39.46	37.6	47.22	41.89	30.55	28.87	26.88	29.83	55.2	33.03	51.81	56.99	55.18	53.13	59.23	51.03	49.05	36.01	42.21	54.49	49.42	45.68	51.03	46.21	39	38.41	39.76	45.47	45.24	57.91	41.1	46.64	38.74	40.43	32.1	42.17	39.8	47.07	39.2	40.19	56.5	48.69	40.79	59.35	50.15	45.84	53.37	47.58	48.07
ENSMMUG00000001247	5.79	6.48	5.81	7.26	6.66	6.21	5.6	6.61	6.11	8.19	7.32	9.65	8.47	8.81	8.92	8.43	5.88	5.51	5.02	7.5	7.29	7.08	7.55	6.95	5.23	6.42	4.71	5.68	7.03	6.99	7.57	6.36	16.76	19.42	15.92	18.98	18.9	19.85	19.7	18.76	12.72	13.45	10.88	12.38	13.15	12.41	12.45	12.1	8.92
ENSMMUG00000001248	1.43	1.57	3.16	1.5	2.15	2.6	1.9	1.94	2.34	1.79	3.74	2.93	3.42	2.52	2.69	4.08	1.27	1.36	2.95	3.66	2.46	2.26	1.53	1.11	1.49	1.51	3.25	1.12	1.32	1.86	1.78	1.55	1.42	1.1	1.33	1.98	1.92	1.73	1.34	2.6	2.3	1.94	2.31	1.33	1.81	1.73	1.32	2.23	2.96
ENSMMUG00000001250	1.98	1.89	3.05	2.16	2.97	2.7	1.95	1.98	4.27	4.06	4.94	5.11	4.88	4.12	4.57	3.95	2.73	2.81	4.02	3.94	3.71	3.16	3.44	2.98	2.45	2.41	1.91	1.74	1.98	2.04	2.08	1.84	5.92	6.03	3.99	4.69	3.61	4.03	3.64	3.35	5.48	5.74	6.03	5.78	5.46	4.93	5.18	4.83	6.07
ENSMMUG00000001251	0.01	0.01	0.01	0	0.01	0.01	0	0.03	0.02	0	0	0.01	0	0	0.02	0	0.03	0.02	0	0.02	0	0	0	0	0	0.01	0	0	0.03	0.05	0	0	1.2	4.58	1.38	1.84	3.57	5.6	2.27	2.07	0	0.01	0	0	0	0.03	0.02	0	0
ENSMMUG00000001252	0.08	0	0.14	0	0.07	0.3	0	0	0.03	0	0.09	0	0	0.27	0	0.08	0	0	0.08	0	0	0.11	0	0	0	0	0.08	0	0.04	0.09	0	0	0.63	1.21	0.81	0.39	0.6	3.31	1.49	0.55	0	0	0.05	0	0.05	0	0	0	0
ENSMMUG00000001254	0.01	0.01	0.01	0.02	0.01	0.01	0.03	0.01	0.05	0.02	0.07	0.04	0.03	0.01	0.04	0.02	0.03	0.01	0.16	0.06	0.1	0.06	0.05	0.03	0.03	0.03	0.03	0.03	0.03	0.04	0.02	0.01	0.01	0.01	0.01	0.02	0.02	0	0.01	0.02	0.04	0.02	0.02	0.03	0.02	0.02	0.01	0	0.04
ENSMMUG00000001255	0.12	0.22	0.09	0.02	0.06	0.16	0.1	0.14	0.19	0.18	0.11	0.24	0	0.3	0.17	0.12	0.12	0.04	0.22	0.06	0	0.04	0.09	0.07	0.41	0.1	0.17	0.24	0.12	0	0	0.24	0.35	0.69	0.38	0.22	0	0.06	0.36	0.47	0	0.33	0	0.11	0.04	0.06	0.02	0	0.11
ENSMMUG00000001256	0.02	0.02	0.02	0.01	0.02	0.02	0.02	0.01	0.01	0	0	0.03	0	0	0.02	0.02	0.02	0.01	0.06	0.06	0	0.01	0	0.01	0	0.01	0.01	0	0.02	0.04	0.01	0.03	0.13	0.09	0.03	0.08	0.02	0.09	0.19	0.04	0.02	0	0	0	0.01	0.01	0.02	0	0.02
ENSMMUG00000001258	2.1	2.68	2.47	2.6	3.35	3.02	2.39	2.55	2.07	2.78	1.77	2.72	2.24	2.29	2.18	2.06	1.33	1.7	2.49	2.91	1.49	1.96	1.55	1.56	2.21	2.55	1.79	1.71	1.36	2.17	2.75	1.7	2.85	3.12	4.44	4.04	3.8	3.6	3.79	4.27	2.28	2.92	3.02	3.54	2.61	2.64	2.79	2.84	3.15
ENSMMUG00000001259	0	0.02	0.01	0.01	0.02	0.03	0.04	0.03	0.06	0.01	0.01	0.03	0.02	0.01	0.04	0.03	0.02	0.06	0.02	0.01	0	0.03	0.02	0.01	0.04	0.02	0.03	0	0.06	0.01	0.01	0.03	0.04	0.05	0.04	0.06	0.05	0.07	0.02	0.01	0.02	0.05	0.03	0.03	0.02	0.02	0	0	0.04
ENSMMUG00000001260	0.01	0.02	0.01	0.04	0.02	0.04	0.04	0.02	0	0.05	0.04	0.02	0.01	0	0.03	0.02	0.01	0.01	0.02	0.02	0.09	0.01	0.05	0.07	0.04	0.03	0.11	0.05	0.01	0.02	0.12	0	0.02	0	0.01	0.05	0.01	0.03	0.05	0.06	0	0.05	0.06	0.01	0.01	0.05	0.18	0.01	0.02
ENSMMUG00000001261	0.02	0.02	0.01	0.04	0.03	0.02	0	0.01	0.01	0.01	0.02	0.03	0	0.01	0.01	0.02	0.02	0.03	0.01	0.01	0.01	0.01	0	0.02	0.01	0	0.04	0.01	0.03	0	0.02	0.04	0.05	0.02	0.03	0.02	0	0.06	0.02	0.03	0.04	0.02	0.06	0.04	0.03	0.01	0.02	0.01	0.03
ENSMMUG00000001262	55.48	54.62	42.97	42.05	22.91	25.94	27.36	26.19	72.72	46.79	58.71	61.65	44.99	52.35	52.49	40.46	73.11	59.32	39.81	56.53	46.92	43.9	68.79	41.43	48.62	45.54	42.59	44.19	45.79	45.66	41.19	55.65	2.12	2.31	1.67	2.84	2.21	2.06	2.48	1.6	57.14	43.17	38.23	47.57	36.19	34.08	37.9	24.06	71.63
ENSMMUG00000001264	24	24.44	29.11	24.4	21.43	23.38	19.09	22.55	23.24	19.04	24.17	24.28	20.83	22.52	24	25.74	23.89	20.84	20.09	24.5	20.55	20.37	22.25	20.65	22.31	25.15	27.49	29.05	26.9	32.11	27.81	27.21	34.71	41.46	32.27	36.41	32.44	37.21	34.58	35.22	30.97	30	28.56	32.1	26	28.84	27.84	30.87	32.35
ENSMMUG00000001266	5.71	5.79	7.26	6.17	6.22	6.8	5.81	6.99	4.92	6.28	6.65	5.64	5.23	6.85	6.55	6.57	4.37	4.48	5.53	4.88	5	5.44	7.49	5.91	3.96	3.78	4.62	4.16	4.58	4.61	5.73	4.98	7.62	8.78	7.87	7.04	6.85	9.87	9.48	7.64	5.13	5.39	6.29	5.36	5.07	5.46	5.69	5.83	5.55
ENSMMUG00000001267	5.65	6.28	6.3	6.57	6.33	5.57	6.12	6.03	7.74	7.58	10.27	9.32	9.96	10.82	10.76	9.33	6.6	6.32	5.97	7.99	7.78	7.93	11.6	8.55	6.78	6.02	6.95	7.52	7.16	8.38	7.58	6.58	8.21	9.93	7.62	9.4	9.85	12.48	11.08	10.63	9.98	8.84	7.29	8.88	10.02	9.92	10.76	9.68	7.99
ENSMMUG00000001268	3.61	4.18	5.04	3.84	3.52	3.45	2.78	3.82	4.02	3.16	3.58	4.1	3.93	3.9	4.21	4.01	3.38	2.4	3.48	3.76	3.35	2.96	3.62	3.45	3.67	3.55	4.01	3.92	3.15	3.53	3.97	4.06	13.16	13.12	10.67	13.15	12.61	12.92	12.06	13.28	10.53	10.36	9.67	10.1	8.45	7.89	9.13	9.05	10.38
ENSMMUG00000001269	6.37	5.45	8.19	5.96	5.72	6.51	5.52	6.31	5.93	5.6	6.62	6.37	5.52	5.66	7.85	6.57	4.92	4.15	6.68	5.98	5.08	5.2	4.98	5.5	5.92	6	7.14	5.23	5.38	6.87	6.56	6.3	9.63	8.03	9.1	9.55	9.92	8.9	8.99	10.85	7.11	7.85	10.99	9.75	7.05	7.44	10.93	8.9	6.51
ENSMMUG00000001270	0	0	0	0	0	0	0	0	0	0	0	0	0	0	0	0	0	0	0	0	0	0	0	0	0	0	0	0	0	0	0	0	2.5	1.5	2.56	1.6	1.46	2.01	1.45	2.13	3.46	1.7	3.42	1.58	2.06	2.57	1.89	1.87	2.83
ENSMMUG00000001271	0.02	0.02	0.02	0.05	0.17	0.11	0.09	0.09	0.02	0.09	0	0.03	0.08	0.11	0.1	0.03	0	0	0.09	0.08	0	0	0.05	0.04	0	0	0.18	0	0.05	0.03	0.07	0.07	1.22	1.07	0.73	1.31	0.46	1.12	1.46	1.13	0.33	0.21	0.27	0.14	0.48	0.31	0.13	0.2	0.09
ENSMMUG00000001272	0.1	0.24	0.21	0.12	0.31	0.27	0.19	0.08	0.09	0.12	0.11	0.16	0.11	0.13	0.25	0.07	0.24	0.14	0.22	0.25	0.17	0.2	0.15	0.06	0.21	0.19	0.15	0.11	0.1	0.24	0.41	0.06	1.5	1.07	1.59	1.59	1.39	1.54	1.98	0.79	0.89	0.42	0.73	0.74	0.75	0.85	0.71	0.57	0.55
ENSMMUG00000001273	4.47	4.08	5.16	5.21	5.35	4.15	4.17	4.06	5.18	5	6.01	5.67	6.07	4.66	5.95	4.37	4.33	3.38	3.43	4.83	5.02	3.48	4.05	3.46	3.85	2.83	3.66	3.49	5.47	3.2	4.1	3.63	2.21	1.89	1.96	2.87	2.22	2.41	2.21	2.1	5.81	4.86	4.62	4.83	6.48	4.08	6.53	4.21	7.28
ENSMMUG00000001274	0	0	0	0	0	0	0	0	0	0	0.06	0	0.03	0.04	0.07	0.05	0	0.02	0.02	0	0	0.02	0	0	0	0	0	0	0.03	0	0	0	0	0	0	0	0	0	0	0	0	0.1	0	0	0	0.04	0	0.01	0
ENSMMUG00000001275	20.46	22.09	24.61	19.05	15.15	14.73	14.98	17.02	20.79	21.71	20.06	19.55	18.6	17.13	22.29	19.16	17.59	15.56	18.38	21.22	19.76	14.69	19.56	18.15	18.96	19.34	22.88	21.48	17.03	21.86	20.33	24.36	25.56	26.64	31.36	27.44	28.61	24.7	25.5	35.11	32.77	34.36	32.66	33.7	31.56	33.92	41.48	32.28	30.72
ENSMMUG00000001276	2.18	2.11	2.35	2.7	3.06	2.99	2.68	3.06	3.34	3.54	3.49	3.46	3.72	3.48	3.51	3.47	2.92	2.13	3.15	2.52	2.84	2.92	3.32	2.83	2.76	2.42	1.82	1.94	1.67	2.59	2.65	1.68	2.57	2.52	3.02	3.17	2.9	4.48	4.75	3.89	3.96	4.09	3.37	3.73	3.41	4.29	3.81	3.78	3.8
ENSMMUG00000001278	2.3	2.68	3.36	4.03	2.46	3.44	1.81	2.1	3.67	4.33	2.07	3.64	1.33	3.02	1.97	2.65	2.54	2.55	1.35	3.79	1.45	2.73	2.08	2.48	1.77	1.72	1.72	2.53	1.43	2.41	2.38	2.45	1.36	1.04	1.04	1.78	0.49	2.3	1.29	1.65	1.63	1.73	1.13	1.94	1.4	1.81	2.19	2.34	4.82
ENSMMUG00000001279	0	0	0.01	0	0.03	0	0	0.01	0	0	0	0	0	0	0	0.01	0	0	0	0	0	0.01	0	0.05	0	0.03	0	0	0.03	0	0	0	0.02	0	0.01	0.03	0	0.04	0	0	0	0	0	0.01	0	0	0	0	0.04
ENSMMUG00000001281	0	0	0	0	0	0	0	0	0	0	0	0	0	0	0	0	0	0	0	0	0	0	0	0	0	0	0	0	0	0	0	0	0.35	0.49	0.36	0.08	0.31	0.48	0.39	0.33	0.37	0.59	1.17	1.28	0.38	0.69	1.08	0.36	0.42
ENSMMUG00000001282	47.47	52.52	51.96	42.58	32.86	30.59	33.2	34.83	41.73	31.94	39.18	33.98	37.69	33.43	40.74	36.05	35.12	34.59	38.33	38.51	35.36	32.47	34.26	41.45	41.24	40.72	52.21	45.89	40.41	41.83	40.99	49.5	48.09	48.19	46.45	44.1	46.11	44.75	39.66	51.28	42.72	44.49	43.81	42.11	41.5	32.79	48.87	42.29	42.35
ENSMMUG00000001283	4	4.52	2.15	2.17	1.45	3.02	2.49	2.31	2.18	2.25	2.23	2.51	2.81	5.87	5.75	3.15	3.16	2.27	1.24	1.8	1.98	4.68	5.62	2.77	2.24	3.09	2.05	2.03	2.33	5.25	3.71	2.88	2.97	2.63	3.37	2.7	3.6	4.51	4.4	4.27	2.59	1.88	2.79	2.37	3.21	4.82	4.77	2.98	2.23
ENSMMUG00000001284	0.01	0.03	0.03	0.04	0.04	0.02	0.02	0.07	0.04	0.03	0.04	0	0.01	0.03	0.02	0	0.01	0.09	0.02	0.03	0.04	0.03	0.01	0.02	0.04	0.09	0.05	0	0.07	0.06	0.03	0.02	0.09	0.11	0.07	0.09	0.03	0.09	0.04	0.1	0.07	0.02	0.05	0.03	0.05	0.02	0.01	0.02	0.07
ENSMMUG00000001285	0.19	0.33	0.17	0.14	0.27	0.16	0.14	0.26	0.15	0.13	0.18	0.29	0.21	0.14	0.34	0.34	0.08	0.06	0.24	0.2	0.06	0.27	0.15	0.17	0.26	0.19	0.13	0.15	0.07	0.14	0.27	0.33	7.57	10.17	6.82	9.54	8.82	12.07	11.54	9.3	8.41	8.77	8.67	10.58	9.65	11.35	11.75	13.01	8.41
ENSMMUG00000001286	73.99	65.61	57.93	91.46	98.42	104.82	77.92	91.57	19.85	22.87	29.46	30.49	29.64	31.58	29.55	32.21	26.39	20.92	21.76	26.67	27.02	26.16	37.68	32.6	28.48	27.15	26.8	44.69	49.69	35.39	48.09	40.58	83.97	90.83	85.36	90.23	108.62	101.55	103.66	102.29	26.7	26.11	32.68	35.06	29.34	36.25	36.73	35.24	25.25
ENSMMUG00000001287	35.68	34.35	46.26	34.26	32.9	31.7	32.56	35.34	43.3	40.03	54.58	53.43	45.52	47.75	53.03	47.61	31.99	25.51	41.39	48.03	41.53	35.05	47.06	43.61	27.97	24.46	28.04	24.94	24.23	23.61	29.28	27.38	56.61	57.41	60.01	57.96	59.28	57.82	58.24	64.77	44.85	49.65	53.9	57.32	45.38	48.58	59.6	51.92	44.69
ENSMMUG00000001288	0.09	0.03	0.04	0.02	0.14	0.02	0.05	0.03	0.08	0.02	0.06	0.03	0.07	0.03	0.01	0.05	0.1	0.04	0.03	0.03	0.03	0.03	0.04	0.01	0.17	0.01	0.03	0.03	0.13	0.18	0.01	0.01	0.03	0.02	0.03	0.04	0.05	0.02	0.03	0.01	0.09	0.03	0.04	0.07	0.05	0.02	0.05	0.04	0.06
ENSMMUG00000001290	3.11	2.58	3.49	2.22	2.56	2.23	1.66	2.61	4.96	3.83	7.75	6.36	8.63	6.5	6.84	7.41	3.77	2.28	5.6	5.97	6.01	3.57	6.34	6.2	3.87	2.67	2.46	2.12	3.24	3.21	3.05	3.48	7.49	7.56	8.18	11.07	12.19	15.21	12.91	12.25	14.43	10.36	16.21	15.82	16.54	13.91	16.7	16.3	7.8
ENSMMUG00000001291	0.23	0.24	0.35	0.09	0.04	0.2	0.11	0.13	0.2	0.37	0.34	0.11	0.64	0.61	0.55	0.64	0.82	0.61	0.44	0.51	0.15	0.38	0.19	0.3	1.19	0.75	0.45	0	0.11	0.19	0.13	0.11	0.23	0.2	0.27	0.32	0.25	0.22	0.39	0.12	5.24	6.67	6	3.71	4.71	5.22	5.46	3.42	0.69
ENSMMUG00000001292	2.46	2.05	2.41	2.66	2.68	2.64	2.76	3.07	2.22	1.95	1.69	2.16	1.8	1.82	1.76	1.96	1.91	1.63	1.96	2.14	1.69	1.81	1.56	1.75	2.09	1.94	1.81	2.01	1.86	1.93	2.11	1.81	3.26	2.38	2.72	2.43	1.83	2.32	2.3	2.3	3.71	4.32	4.53	3.78	4.37	3.81	3.77	3.57	4.73
ENSMMUG00000001293	2.85	2.85	3.09	2.88	2.4	2.51	2.9	3.4	2.52	2.84	3.17	3.34	2.7	4.12	4.44	3.59	2.71	2.03	3.08	3.15	2.86	3.27	3.59	3.22	3.57	3.88	4.5	3.66	3.36	6.31	4.46	5.03	4.77	4.87	4.9	5.81	5.6	7.19	6.42	6.09	3.05	3.78	4.16	4.43	4.12	4.31	5.4	4.75	3.32
ENSMMUG00000001294	4.5	4.79	4.62	3.43	2.6	2.77	2.21	2.71	3.77	3.34	3.93	3.7	3.16	3.08	3.51	3.53	3.14	3.17	2.99	3.91	3.2	2.41	3.2	2.81	3.72	4.13	3.89	3.55	2.99	3.6	3.61	3.08	17.97	17.46	20.65	18.55	16.03	16.24	18.22	16.68	9.52	9.76	10.65	9.97	9.88	10.89	10.85	11.19	10
ENSMMUG00000001295	0	0.03	0	0	0	0	0.05	0	0.04	0.03	0.15	0.14	0.31	0.06	0	0	0	0	0.6	0	0.3	0.49	0.91	0.21	0.18	0.04	0.14	0	0	0	0.06	0	0	0	0	0	0	0	0.18	0	0.42	0.36	1.58	0.86	2.25	1.83	1.82	1.68	0.05
ENSMMUG00000001296	0.22	0.34	0.49	0.5	0.8	0.96	0.55	0.33	0.16	0.34	0.31	0.51	0.15	0.41	0.29	0.19	0.2	0.43	0.31	0.43	0.25	0.28	0.29	0.32	0.38	0.35	0.38	0.33	0.28	0.75	0.42	0.21	0.07	0.08	0.08	0.13	0.01	0.08	0.13	0.1	0.13	0.03	0.33	0.29	0.1	0.18	0.18	0.17	0.02
ENSMMUG00000001297	35.79	38.78	45.92	42.59	45.45	48.71	33.94	46.61	79.53	72.76	80.3	67.54	68.46	80.8	64.12	64.4	44.9	33.39	38.93	55.34	40.67	40.87	61.95	41.16	35.9	31.22	24.57	39.75	37.92	38.15	38.19	35.22	148.01	169.6	138.25	166.72	177.67	206.67	161.77	158.46	101.51	92.52	69.08	77.05	60.79	88.26	60.83	71.17	106.56
ENSMMUG00000001299	0.11	0.05	0.04	0.09	0.1	0.06	0.06	0.1	0.38	0.2	0.22	0.15	0.28	0.15	0.16	0.11	0.04	0.03	0.09	0.08	0.08	0.14	0.09	0.09	0.05	0.06	0.07	0.06	0.05	0.06	0.07	0.01	8.18	5.24	3.75	4.36	2.67	3.68	2.59	2.9	0.2	0.17	0.19	0.26	0.09	0.27	0.06	0.1	0.26
ENSMMUG00000001300	0.45	0.65	2.48	0.66	1.25	0.8	0.65	0.71	1.15	1.04	3.52	1.37	1.5	1.75	0.79	0.62	1	1.01	3.77	1.43	1.24	2.19	1.06	0.47	0.38	0.88	2.68	0.9	0.63	0.65	0.54	0.55	3.99	6.17	5.96	3.47	4.84	3.23	2.63	3.03	0.97	1.53	2.92	0.81	1.18	1.59	0.39	0.86	1.37
ENSMMUG00000001301	0.02	0	0.01	0	0	0	0.05	0	0	0	0	0.08	0	0.02	0	0	0.03	0.01	0.01	0.1	0	0.04	0.01	0	0	0	0.03	0	0	0.07	0	0	0.02	0.07	0.02	0	0	0.07	0	0	0.02	0	0.04	0.01	0.01	0	0	0	0
ENSMMUG00000001302	0.02	0.04	0.04	0.03	0.02	0.02	0.02	0.02	0.02	0.03	0.01	0.02	0	0.01	0.02	0.02	0.02	0.03	0.01	0.01	0.03	0.01	0.02	0.01	0.01	0.02	0.03	0.02	0.01	0.01	0.02	0.01	0.02	0.02	0.03	0.02	0.02	0	0.03	0.03	0.03	0.04	0.01	0.01	0.01	0.04	0.04	0.01	0.02
ENSMMUG00000001303	0	0	0.01	0	0.02	0	0	0	0	0	0	0.07	0	0	0	0.01	0	0	0	0.03	0	0.01	0	0	0	0.01	0	0.03	0	0	0	0.04	0	0.01	0.01	0.01	0	0.02	0.05	0.02	0	0	0	0	0	0	0.09	0	0
ENSMMUG00000001304	1.29	1.01	1.46	1.52	1.26	1.09	0.96	0.92	1.08	0.71	1.21	1.03	0.99	0.88	0.9	1.08	0.79	0.73	0.89	1.04	0.45	0.8	0.75	0.72	0.99	0.9	1.75	1.39	1.11	1.68	1.5	1.43	22.04	21.72	21.82	26.65	18.51	17.28	24.34	18.59	3.59	3.57	4.17	3.91	3.12	3.61	5.02	3.9	3.56
ENSMMUG00000001305	14.14	12.68	15.69	13.44	11.19	9.66	10.58	11.65	14.5	11.7	17.42	14.48	17.72	19.42	20.22	16.57	13.51	10.53	12.22	15.28	16.87	13.42	21.45	13.05	13.32	12.25	16.32	14.58	14.03	22.28	14.19	16.47	19.5	18.19	15.64	16.93	21.67	20.98	20.56	19.78	18.8	17.68	18.19	20.12	23.88	22.69	24.56	20.76	18.53
ENSMMUG00000001306	0.98	0.72	0.59	0.74	0.55	0.72	0.51	0.7	0.91	0.66	1.03	0.85	0.92	1.31	0.96	0.96	0.84	0.92	0.57	1.19	1.1	1.5	1.23	0.86	0.51	0.48	1.02	0.81	0.68	1.49	0.75	0.81	1.28	1.53	1.45	1.29	1.21	1.62	1.3	1.45	0.71	0.8	0.77	0.68	0.84	1.64	0.63	0.74	0.96
ENSMMUG00000001307	0.06	0.1	0.05	0.08	0.08	0.06	0.07	0.05	0.08	0.12	0.1	0.12	0.08	0.07	0.09	0.07	0.07	0.11	0.06	0.14	0.01	0.07	0.06	0.04	0.11	0.04	0.05	0.08	0.03	0.09	0.08	0.06	0.38	0.36	0.32	0.36	0.35	0.37	0.33	0.24	0.09	0.08	0.09	0.08	0.03	0.06	0.04	0.08	0.19
ENSMMUG00000001308	8.37	7.4	5.68	6.55	6.95	7.91	4.79	6.78	17.4	11.83	17.92	13.73	13.54	11.41	11.26	10.49	7.53	5.93	8.44	7.79	6.35	4.85	6.89	6.54	7.87	6.95	5.66	4.74	5.05	4.67	6.32	5.42	1.18	0.83	0.9	1.11	1.04	0.91	0.87	0.7	43.74	47.15	37.3	33.33	27.92	28.83	23.92	28.45	20.75
ENSMMUG00000001310	0.24	0.21	0.16	0.36	0.2	0.05	0.15	0.13	0.31	0.29	0.55	0.44	0.33	0.22	0.4	0.27	0.3	0.32	0.18	0.47	0.51	0.19	0.17	0.36	0.13	0.17	0.08	0	0.16	0.33	0.26	0.26	0.18	0.21	0.26	0.29	0.22	0.2	0.25	0.2	0.32	0.15	0.23	0.43	0.24	0.14	0.25	0.46	0.31
ENSMMUG00000001311	0	0	0.03	0.02	0	0.01	0	0	0	0	0	0	0	0.02	0	0	0	0	0	0	0	0	0	0	0	0.01	0	0	0	0.02	0	0	0.02	0.02	0.03	0.02	0.08	0.08	0.01	0.02	0	0.02	0	0.04	0.02	0	0	0	0
ENSMMUG00000001312	8.52	8.61	12.97	9.49	11.43	13.47	9.9	12.11	20.07	23.67	21.31	16.68	15.18	16.87	19.6	16.15	16.91	15.49	17.3	16.75	14.85	14.35	19.26	13.42	13.08	13.89	15.29	8.63	11.42	10.34	14.73	10.74	3.38	4.01	4.75	3.94	2.73	2.58	3.05	3.1	19.53	21.45	20.01	16	16.21	19.98	23.24	19.99	20.67
ENSMMUG00000001313	3.41	3.8	4.6	4.42	3.52	4.19	4.49	4.78	3.3	3.29	3.8	4.71	4.45	4.23	4.93	4.65	3.1	2.48	3.2	3.78	3.52	3.41	4.67	3.93	4.24	4.06	4	5.72	6.14	6.04	6.05	6.22	9.93	10.22	8.82	10.14	9.74	10.47	9.75	10.07	6.41	5.92	6.91	8.35	6.07	6.85	9.06	7.72	6.69
ENSMMUG00000001314	46.39	46.78	57.39	46.99	41.5	42.33	36.28	38.87	57.88	48.3	59.63	57.9	57.14	55.21	60.91	51.9	46.48	43.49	38.97	52.7	44.67	39.99	49.03	34.91	40.29	36.62	44.35	43.88	56.92	44.54	44.08	54.73	28.44	31.1	26.46	29.19	31.3	38.71	34.43	29.98	39.77	36.9	33.74	37.39	34.54	34.62	34.13	34.8	58.79
ENSMMUG00000001316	4.14	4.16	4.57	3.71	3.71	3.03	3.08	4.4	3.46	4.22	3.66	3.73	3.97	3.47	4.89	4.09	2.48	2.66	3.86	3.35	2.72	2.64	3.35	2.85	2.81	3.52	3.11	4.39	2.79	2.66	3.69	3.14	3.57	4.07	5.03	4.11	3.98	3.48	3.72	5.04	3.63	4.25	4.55	3.76	4.64	3.7	4.57	4.69	3.51
ENSMMUG00000001317	52.66	53.09	60.68	52.71	48.03	51.36	46	49.77	52.86	44.11	49.93	48.86	39.62	37.7	41.86	41.77	50.78	51.59	43.46	49.97	43.27	38.75	38.4	42.05	46.87	48.57	48.06	42.22	48.39	41.41	44.52	49.26	36.28	33.14	35.83	32.85	32.71	30.32	30.33	36.59	48.73	52.78	53.48	44.97	44.03	42.21	46.97	47.14	54.56
ENSMMUG00000001319	18.13	17.3	17.39	16.51	16.07	15.97	15.67	17.88	18.38	19.5	23.62	19.83	22.47	20.96	21.54	19.72	16.07	14.93	18.18	20.46	19.64	17.32	23.3	18.45	13.51	13.06	14.36	13.5	15.28	14.39	16.38	14.47	13.72	13.11	11.35	13.54	13.07	13.05	12.46	12.88	19.51	19.49	20.94	20.54	16.61	19.08	19.11	21.92	21.57
ENSMMUG00000001321	25.31	27.05	26.06	22.55	14.86	15.89	18.28	26.93	26.03	22.5	35.01	33.6	30.42	36.29	37.64	41.82	17.14	19.11	21.16	28.82	22.92	26.58	35.72	26.77	17.71	18.53	22.97	24.26	29.29	33.89	26.71	30.07	48.9	75.27	67.05	70.53	77.92	101.71	87.98	97.13	22.13	22.89	28.09	31.98	30.51	37.95	33.52	32.97	25.26
ENSMMUG00000001322	0.02	0.04	0.1	0.01	0.03	0.03	0	0.02	0.06	0	0.06	0	0	0	0.09	0.05	0.02	0.03	0	0	0	0	0.08	0	0.02	0.04	0	0.05	0.07	0.06	0.06	0	0.06	0.02	0	0.04	0	0.05	0	0.05	0.02	0	0	0.06	0.05	0.06	0.02	0	0
ENSMMUG00000001324	0.02	0.04	0.01	0.05	0.01	0.12	0.1	0.04	0.03	0.17	0.24	0.23	0.15	0.21	0.19	0.31	0.05	0.08	0.1	0.22	0.04	0.1	0.01	0.01	0.09	0.1	0.05	0.06	0.04	0.08	0.08	0.01	0.15	0.28	0.13	0.22	0.19	0.09	0.18	0.24	0.11	0.22	0.13	0.12	0.12	0.34	0.08	0.37	0.09
ENSMMUG00000001325	0.79	0.39	0.71	0.67	0.44	0.27	0.55	0.48	0.71	0.59	0.8	0.88	0.77	1.02	0.78	0.63	0.76	0.95	0.73	0.5	0.61	0.54	0.73	0.38	0.43	0.54	0.38	0.4	0.41	0.37	0.46	0.26	0.35	0.25	0.32	0.48	0.31	0.41	0.5	0.28	0.44	0.55	0.5	0.81	0.4	0.65	0.53	0.46	0.51
ENSMMUG00000001326	0.06	0.03	0.04	0.07	0.03	0.01	0.03	0.03	0.08	0.04	0.03	0.02	0.08	0.04	0.03	0.04	0.04	0.03	0.01	0.04	0.02	0.01	0.13	0.02	0.01	0.04	0	0	0.04	0.02	0	0.06	0.01	0	0	0.07	0.03	0.01	0.03	0.06	0.04	0.01	0.09	0.03	0.05	0.02	0.02	0.06	0.12
ENSMMUG00000001328	0.83	1.08	0.3	0.45	0.3	0.39	0.2	0.46	0.32	0.22	0.45	0.25	0.33	0.27	0.24	0.61	0.36	0.1	0.19	0.33	0.26	0.26	0.29	0.23	0.94	0.94	1.13	0.38	0.46	1.13	0.35	1.97	0.48	0.24	0.24	0.4	0.16	0.32	0.44	0.4	0.4	0.16	0.26	0.22	0.13	0.24	0.2	0.33	0.31
ENSMMUG00000001329	0.43	0.31	0.5	0.36	0.66	0.55	0.55	0.48	0.34	0.37	0.31	0.42	0.58	0.59	0.45	0.48	0.49	0.33	0.44	0.39	0.5	0.62	0.43	0.59	0.57	0.57	0.52	0.24	0.43	0.47	0.47	0.57	4.21	4.26	3.92	3.77	4.21	4.48	4.41	4.21	1.38	1.55	1.68	1.68	2.2	2.22	2.18	1.95	0.85
ENSMMUG00000001330	0	0	0	0	0	0	0	0	0	0	0	0	0	0	0	0	0	0	0	0	0	0	0	0	0	0	0	0	0	0	0	0	18.38	21.75	16.67	19.68	20.31	23.37	18.49	20.08	24.58	23.42	24.44	26.4	27.95	23.64	24.02	21.06	26.99
ENSMMUG00000001332	6.09	5.94	5.03	3.95	3.09	2.99	4.7	5.41	1.84	1.6	5.4	3.46	4.19	4.63	5.77	6.12	3.63	3.41	4.49	4.86	4.15	5.67	8.87	6.61	4.86	2.92	5.19	6.68	4.8	6.88	5.56	8.42	2.3	1.88	2.69	3	3.24	4.15	5.52	4	3.95	1.73	4.29	5.16	5.09	5.9	4.88	5.22	3.33
ENSMMUG00000001334	36.75	36.3	36.24	31.3	29.78	30.48	27.89	40.14	51.69	52.02	58.34	44.13	53.2	55.12	44.7	50.82	33.94	31.05	33.86	35.53	37.88	31.33	48.41	36.99	34.65	29.68	36.38	39.11	38.61	57.49	40.88	30.89	13.93	19.48	18.11	20.66	17.6	22.42	18.26	22.71	47.3	47.32	38.95	45.23	32.51	50.61	38.23	45.66	54.54
ENSMMUG00000001335	0	0	0	0	0.02	0	0.05	0	0	0.02	0	0	0.02	0	0	0	0	0	0.01	0	0	0	0	0	0.02	0	0	0	0	0	0	0	0.02	0	0	0	0	0	0	0.02	0	0	0	0	0.01	0	0	0	0
ENSMMUG00000001336	0.65	0.55	0.54	0.36	0.35	0.6	0.32	0.49	0.18	0.29	0.22	0.35	0.2	0.22	0.32	0.29	0.32	0.41	0.22	0.32	0.2	0.24	0.17	0.11	0.22	0.23	0.23	0.35	0.27	0.24	0.46	0.29	4.38	3.78	3.06	2.41	4.47	3.1	2.39	2.34	2.01	2.32	1.8	1.29	1.6	1.6	1.57	1	2.43
ENSMMUG00000001338	29.86	30.56	35.78	26.53	25.55	24.18	22.28	25.27	32.59	30.87	32.34	30.82	27.31	25.88	29.98	28.71	22.94	20.26	22.69	26.92	22.15	21.01	22.27	24.17	26.99	25.94	24.66	18.91	19.55	19.96	21.95	20.16	26.63	27.8	25.31	25.35	27.06	23.24	22.59	27.54	28.08	34.44	31.53	28.97	24.05	25.28	25.88	30.21	36
ENSMMUG00000001339	2.46	2.39	2.56	2.67	2.7	2.51	1.66	2.52	3.15	3.24	3.41	2.75	3.82	2.93	2.77	2.94	2.29	2.14	2.22	2.57	2.86	2.44	2.52	2.28	2.18	2.04	1.96	2	2.61	2.04	2.32	1.81	2.38	2.59	2.3	2.8	3.35	3.49	2.99	2.93	5.24	5.17	4.75	4.84	4.86	4.07	4.13	5.08	5.28
ENSMMUG00000001340	7.2	5.92	7.36	5.9	4.01	4.42	3.47	4.7	6.97	4.04	5.73	5.38	5.92	6.31	5.9	7.18	10.22	8.14	7.44	8.04	8.81	5.82	5.81	7.7	8.71	9.14	10.5	9.89	8.82	13.18	10	14.84	14.77	19.98	17.84	19.05	18.35	16.33	16.69	21.78	18.12	18.6	15.02	19.02	17.98	14.53	17.13	20.48	20.21
ENSMMUG00000001341	1.01	1.24	1.69	0.97	0.58	0.45	0.89	0.81	3.56	3.21	3.79	3.49	3.1	3.73	3.25	3.07	4.03	3.76	2.52	3.25	3.11	3.06	4.96	3.05	3.85	2.8	2.73	1.66	1.55	1.93	1.79	1.76	23.35	22.43	17.92	24.06	19.23	18.6	19.9	21.39	18.58	21.03	16.72	19.89	14.05	20	13.66	18.63	6.5
ENSMMUG00000001342	11.18	10.97	15.46	12.89	10.75	11.33	9.34	11.75	26.33	24.32	33.58	37.05	27.41	30.99	25.95	28.71	28.03	24.52	21.5	28.08	24.62	26.65	32.81	29.77	23.56	23.18	13.16	15.16	14.39	14	13.75	15.89	16.51	18.07	15.25	19.6	20.38	23.12	21.73	19.49	41.03	33.87	39.95	50.14	39.85	38.45	38.07	46.5	29.81
ENSMMUG00000001343	5.24	4.84	5.78	5.39	5.13	5.19	5.15	5.72	4.98	4.75	6.21	4.98	6.33	6.61	6.46	6.09	4.18	3.16	4.53	5.03	5.16	4.92	5.86	5.03	4.49	4.86	6.24	5.89	6.8	8.96	7.04	7.21	17.63	18.48	14.87	19.08	20.7	27.89	20.75	18.72	11.37	10.36	10.61	12.26	11.62	13.52	12.56	12.1	10.56
ENSMMUG00000001344	35.49	28.69	19.23	30.28	25.14	27.43	17.8	26.14	15.94	13.09	20.39	13.55	12.08	12.9	14.01	13.25	19.37	11.8	11.49	10.89	9.62	11.37	13.14	10.42	16.66	15.61	10.85	10.98	16.36	11.73	19.37	11.7	157.37	174.4	195.13	193.62	153.42	155.26	164.13	176.82	104.46	104.19	99.76	88.83	75.18	96.53	73.64	91.04	34.76
ENSMMUG00000001345	6.88	7.4	8.38	6.44	5.87	8.19	7.85	7.47	5.77	5.24	7.42	7.16	6.39	7.58	7.91	7.9	6.71	5.88	7.57	6.43	5.23	6.74	6.23	6.51	7	8.58	10.5	7.6	6.12	13.18	10.65	8.44	11.37	12.91	12.09	13.34	11.91	18.35	15.2	17.07	8.45	7.99	8.81	7.85	8.78	8.97	8.91	8.59	7.67
ENSMMUG00000001346	0.63	0.65	0.66	0.5	0.42	0.26	0.46	0.35	0.78	0.55	0.52	0.6	0.53	0.48	0.79	0.67	0.82	0.42	0.36	0.62	0.2	0.22	0.11	0.18	0.55	0.67	0.55	0.75	0.48	0.41	0.54	0.55	0.2	0.68	0.38	0.58	0.69	0.05	0.75	0.72	0.4	0.44	0.13	0.28	0.56	0.23	0.41	0.47	1.45
ENSMMUG00000001347	1.93	1.8	2.26	2.1	1.85	2.44	1.77	1.95	2.62	2.2	2.62	2.27	2.7	2.72	2.15	2.41	1.98	1.62	1.62	1.98	2.34	1.99	2.32	2	1.79	1.72	1.98	2.02	2.35	2.72	2.38	1.92	4.24	6.07	4.34	5.58	4.37	6.02	4.61	5.69	4.53	4.38	3.12	3.82	4.07	3.76	3.75	3.39	3.91
ENSMMUG00000001348	1.12	1.41	0.95	1.1	1.24	0.91	1.09	0.92	1.51	0.92	2.25	1.77	2.93	2.27	2.33	2	1.24	1.02	1.33	1.8	1.43	1.37	1.59	0.98	1	0.93	1.27	1.1	1.71	1.47	1.45	1.54	1.79	2.06	1.44	1.75	2.01	1.78	1.92	1.69	1.6	1.15	1.28	1.36	2.04	1.69	1.52	1.85	1.53
ENSMMUG00000001349	7.83	6.83	6.46	6.48	6.77	6.52	4.66	6.23	7.66	6.34	7.04	6.54	6.3	6.41	5.81	7.12	5.32	3.8	4.91	6.13	3.79	4.57	4.42	3.49	5.18	4.58	4.27	5.71	6.05	5.77	5.66	3.9	12.36	10.93	10.54	11.29	8.31	8.18	8.15	7.02	5.55	5.78	4.38	6.18	4.66	6.99	5.75	5.26	8.42
ENSMMUG00000001350	5.34	6.14	7.18	4.94	6.17	5.9	5.77	6.28	5.55	6.33	8.08	7.04	7.19	7.59	7.3	7.2	5.01	4.57	5.66	6.17	6.31	6.47	6.57	6.53	4.99	5.06	6.05	5.25	5.65	5.07	6.88	5.93	18.84	19.09	17.09	20.24	19.43	17.59	18.46	20.21	13.65	14.28	14.26	14.7	15.41	14.14	14.68	15.98	10.76
ENSMMUG00000001351	17.56	18.52	19.19	14.85	13.34	11.45	10.6	13.45	16.13	9.57	15.85	13.27	16.09	16.76	15.53	12.67	17.61	14.61	13.36	14.33	17.23	14.98	16.33	15.23	13.13	11.61	18.07	15.85	19.47	30.54	15.51	17.03	22.94	19.94	19.03	19.63	24.67	24.42	21.58	23.53	25.24	18.58	17.69	20.71	23.44	20.14	17.81	19.7	23.43
ENSMMUG00000001352	68.91	61.18	71.62	56.77	45.63	41.83	44.94	50.37	79.43	48.82	65.84	66.73	63.13	70.23	67.47	60.49	70.5	51.93	47.16	63.42	60.09	55.3	71.2	63.13	63.74	57.31	73.15	62.99	62.09	62.93	64.56	75.65	51.76	51.63	43.62	59.39	56.47	55.53	51.51	59.71	90.19	71.65	75.23	81.45	71.1	80.62	91.29	74.72	88.07
ENSMMUG00000001353	0.01	0.02	0.03	0	0.02	0	0.01	0.01	0	0	0	0	0	0.05	0	0.04	0.02	0	0.02	0	0.01	0.01	0	0	0	0.02	0.05	0.01	0	0.01	0	0	0	0	0.01	0.01	0.03	0	0	0	0.01	0	0	0.01	0	0.01	0.01	0	0
ENSMMUG00000001354	0.01	0.03	0.01	0	0.05	0.01	0.02	0	0	0.03	0	0	0.06	0	0.1	0	0.04	0	0.02	0	0.01	0.04	0.07	0.01	0.02	0.08	0	0	0.02	0.02	0	0.02	0	0	0.03	0	0.05	0	0	0	0.05	0.03	0.01	0.01	0.14	0	0.01	0.02	0.01
ENSMMUG00000001356	2.94	2.37	2.56	2.78	1.37	1.68	1.72	1.54	2.2	1.23	2.85	2.29	2.61	1.79	3.19	2.28	1.12	1.91	2.5	2.31	2.11	2.08	2.66	1.38	1.47	1.97	2.43	2.08	1.56	3.5	2.76	2.58	6	3.61	8.11	7.77	9.69	9.97	12.23	8.93	0.97	0.75	1.77	0.9	1.18	1.28	1.6	1.55	1.79
ENSMMUG00000001357	0.46	0.36	0.35	0.41	0.4	0.3	0.17	0.3	0.2	0.19	0.41	0.25	0.37	0.4	0.45	0.37	0.24	0.3	0.39	0.12	0.39	0.5	0.9	0.51	0.4	0.33	0.49	0.3	0.72	0.86	0.28	0.27	15.71	18.21	15.47	20.2	35.71	36.54	32.48	28.35	0.71	1.54	1.24	1.64	1.2	1.45	0.73	0.73	1.18
ENSMMUG00000001359	6.18	6.16	6.68	5.66	6.84	6.61	6.19	7.37	5	5.95	5.28	5.18	5.17	4.79	4.49	4.79	4.69	3.93	6.37	5.18	3.78	3.92	3.85	4.4	4.63	4.72	4.59	4.86	4.48	4.46	6.1	4.86	12.02	12.87	13.64	12.55	12.84	11.51	12.27	12.53	6.02	8.52	8.75	7.75	7.51	6.89	7.44	7.6	7.58
ENSMMUG00000001360	5.23	5.89	6.31	4.71	4.14	5.04	5.47	6.08	4.01	2.96	4.66	3.7	3.56	3.98	4.05	4.42	3.95	4.29	4.67	4.12	4.35	4.15	5.23	4.31	5.08	6.14	8.21	5.89	6.13	6.58	6.44	7.8	9.69	9.99	11.04	9.16	8.75	9.05	9.18	11.43	7.05	8.08	8.97	7.96	8.38	8.23	10.39	9.64	6.73
ENSMMUG00000001361	9.33	9.55	9.54	9.3	10.07	9.88	8.57	9.63	7.29	7.13	7.31	8.29	7.45	6.93	8.49	8.84	5.76	5.23	7.24	7.68	7.09	5.85	6.42	6.48	6.05	6.16	7.21	7.16	6.65	5.71	8.13	6.88	10.72	10.34	9.43	9.64	9.05	9.21	9.55	10.1	6.63	7.72	7.78	8.73	7.8	7.7	8.56	8.19	7.85
ENSMMUG00000001362	2.45	2.46	2.02	2.56	2.99	3.06	4.41	2.9	1.74	1.96	1.47	1.9	1.85	1.97	1.93	1.77	1.55	1.71	1.65	1.65	1.52	1.99	1.24	1.39	1.83	2.21	2.06	2.26	2.23	2.66	3.04	2.23	4.11	4.75	5.68	4.98	4.28	3.52	4.83	3.72	3.15	4.7	4.15	4.18	4.07	4.49	5.19	3.84	3.05
ENSMMUG00000001363	0	0	0.02	0.04	0.01	0	0	0.06	0.01	0.02	0.01	0.03	0.05	0.06	0	0.04	0	0.04	0	0.01	0	0	0	0.04	0.02	0.01	0.02	0.03	0.02	0.02	0	0.03	0.05	0.01	0	0.02	0.01	0.02	0.04	0.11	0.01	0.04	0.02	0.03	0.01	0	0	0.05	0.02
ENSMMUG00000001364	0	0.02	0.01	0.1	0.05	0.01	0.18	0.05	0	0	0	0.02	0	0.03	0.03	0	0	0.01	0.01	0	0.03	0.01	0.06	0.03	0	0.05	0.02	0.04	0.04	0.13	0	0	0.04	0.07	0.12	0.1	0.06	0.02	0.29	0.02	0.11	0.16	0	0	0	0.05	0.16	0	0.07
ENSMMUG00000001365	0.1	0.11	0.29	0.12	0.25	0.11	0.04	0.02	0.14	0.02	0.15	0.38	0.09	0.05	0.09	0.19	0.09	0.04	0.28	0.12	0	0.07	0	0.14	0.05	0.03	0.25	0.1	0.24	0.17	0.02	0.39	0.15	0.25	0.17	0.32	0.37	0.19	0.37	0.38	0.16	0.11	0.15	0.18	0.24	0.05	0.15	0.19	0.16
ENSMMUG00000001366	8.59	7.12	7.85	9.67	12.76	10.77	9.19	10.34	5.44	7.08	4.3	4.73	4.05	2.31	5.12	4.3	4.51	5.03	5.64	5.12	3.67	3.96	1.76	3.87	5.87	7.56	11.77	9.1	5.04	5.39	8.39	6.61	0.45	0.62	0.96	0.64	0.54	0.56	0.38	0.34	3.74	4.15	4.21	4.67	4.11	2.7	4.4	3.45	6.33
ENSMMUG00000001368	0	0	0	0.02	0.05	0	0.04	0	0	0.02	0	0.16	0	0.08	0.03	0.11	0.11	0	0	0	0	0.18	0.34	0.04	0	0.07	0.06	0.19	0	0	0.08	0.15	0	0.04	0.05	0	0.1	0.09	0.09	0.06	0.02	0	0	0.03	0.02	0	0	0.04	0.08
ENSMMUG00000001369	11.57	11.38	17.84	13.17	8.88	8.98	11.52	11.53	14.8	10.22	20.2	17.57	18.65	18.43	18.95	18.09	14.83	13.53	15.21	18.13	16.3	16.57	20.45	16.53	16.54	17.84	22.87	21.21	21.29	31.74	21.85	25.41	15.24	15.26	14.44	15.11	15	16.95	16.42	15.64	20.35	17.04	18.44	20.47	20.71	18.24	21.36	20.24	16.9
ENSMMUG00000001371	1.13	1.44	1.44	0.99	1.03	1.37	1.04	1.32	1.65	1.88	2.18	2.22	1.77	2.71	2.25	2.09	1.08	1.04	1.23	1.65	1.11	1.65	1.65	1.41	1.51	1.45	1.54	1.47	1.36	1.67	1.48	1.53	14.21	14.6	16.47	23.28	18.76	24.43	19.83	17.97	12.51	12.82	11.65	11.43	11.66	15.41	12.92	12.1	9.36
ENSMMUG00000001372	31.5	32.08	33.12	33.57	26.17	26.45	27.55	28.17	34.7	31.42	42.85	38.94	36.33	45.33	47.88	38.96	29.46	25.87	30.12	35.54	30.44	28.87	42.66	33.25	28.65	25.89	33.78	30.49	29.83	38.62	34.7	34.45	29.36	33.81	31.67	32.49	34.97	39.71	35.31	33.4	36.5	36.48	37.49	43.3	35.32	40.23	47.16	40.36	34.15
ENSMMUG00000001374	0.44	0.54	0.95	0.44	0.51	0.57	0.62	0.46	1.25	0.96	1.74	1.48	1.49	1.43	1.48	1.39	0.79	0.89	1.32	1.2	0.92	1.14	0.86	0.54	0.5	0.63	0.69	0.47	0.57	0.8	0.67	0.43	1.69	2.05	2.01	1.93	1.98	1.76	1.93	2.04	1.26	1.16	1.5	0.99	1.49	1.97	1.5	1.49	1.46
ENSMMUG00000001375	21.04	24.07	22.13	19.58	15.54	17.54	16.59	19.18	22.49	24.84	22.07	21	19.88	21.14	21.05	18.47	21.76	16.72	14.96	17.87	17.28	19.03	19.59	19.36	22.56	23.53	25.81	23.01	21.75	23.15	19.55	25.9	25.79	20.29	22.44	26.52	20.46	19	22.96	22.06	28.16	30.98	29.06	36.41	29.94	34.82	34.79	33.81	25.08
ENSMMUG00000001376	1.36	1.13	1.32	1.44	1.58	1.69	1.32	1.69	1.33	1.51	1.24	1.46	1.29	1.6	1.33	1.76	0.95	0.99	1.26	1.22	1.03	1.19	0.98	1.33	1.05	1.44	1.09	1.13	0.96	1.4	1.46	1.41	4.09	4.57	4.97	4.49	4.08	4.48	4.81	4.86	3.95	5.74	4.7	4.89	4.22	4.98	4.94	5.19	3.76
ENSMMUG00000001377	2.62	2.44	2.63	2.21	2.47	2.56	2.69	2.07	2.26	2.68	2.28	1.76	1.83	1.88	2.07	1.86	2.45	2.57	2.13	1.93	2.19	1.86	2.51	2.11	2.68	2.55	2.88	2.07	2.09	2.17	2.52	2.19	4.85	4.33	5.02	4.54	3.81	4.08	4.45	4.11	3.21	3.27	3.2	3.06	3.26	3.05	3.6	3.03	2.84
ENSMMUG00000001378	0	0	0	0	0	0.04	0	0	0	0	0	0	0	0	0	0	0	0	0	0	0	0	0	0	0	0	0	0	0	0	0	0	0	0	0	0	0	0	0	0	0	0	0.02	0	0	0	0.03	0	0
ENSMMUG00000001379	0.05	0.01	0.01	0.01	0.02	0.02	0.05	0.02	0	0.06	0	0	0.04	0	0.01	0.01	0	0.05	0	0.02	0.06	0.02	0.01	0	0	0	0	0.02	0	0.1	0	0	0.03	0.04	0.13	0.06	0.06	0.05	0.26	0.29	0.02	0.01	0.04	0.02	0.01	0.06	0	0	0
ENSMMUG00000001380	8.57	8.86	8.79	7.54	7.44	9.26	9.89	8.43	7.37	10.47	4.56	6.74	5.68	5.23	6.63	4.7	6.84	6.59	8.73	5.84	4.38	5.36	4.37	4.78	9.02	9.31	8.22	7.27	4.52	5.54	8.22	6.29	9.34	9.24	8.7	7.37	5.57	5.59	6.56	6.41	7.78	10.08	8.39	7.55	7.53	6.41	9.67	6.07	9.9
ENSMMUG00000001381	0.53	0.64	1.12	0.55	0.39	0.38	1.01	0.49	0.07	0.07	0.2	0.11	0.2	0.11	0.12	0.09	0.16	0.3	0.39	0.2	0.32	0.33	0.42	0.31	1.2	1.64	2.31	1.9	1.43	1.4	1.38	1.51	0.2	0.24	0.3	0.18	0.3	0.26	0.29	0.11	0.16	0.3	0.54	0.62	0.3	0.36	0.74	0.31	0.08
ENSMMUG00000001382	0.01	0.05	0.01	0.02	0	0	0.01	0.01	0.02	0.02	0	0	0	0.03	0	0.04	0.02	0.01	0.01	0	0.01	0	0.03	0	0.02	0.01	0.02	0.02	0.01	0.01	0.06	0	0.15	0.03	0.04	0.15	0.01	0	0	0.04	0.01	0.03	0.01	0.01	0.06	0.02	0	0	0
ENSMMUG00000001384	3.64	3.82	4.2	2.89	2.79	2.77	2.84	3.11	3.22	2.92	3.47	3.34	4.05	3.23	4.17	3.35	2.41	2.66	3.49	3.31	3.72	2.98	3.72	3.06	3.77	3.6	4.64	3.83	3.97	4	3.81	3.19	4.91	5.22	5.82	5.55	5.4	6.1	6.37	5.77	4.07	4.91	5.32	4.77	5.64	5.25	5.71	5.23	4.97
ENSMMUG00000001386	7.2	7.44	6.43	8.25	8.58	8.58	5.59	6.09	8.15	8.09	6.84	7.12	6.71	6.17	6.8	6.85	6.06	6.43	5.88	7.17	5.6	6	5.73	4.81	5.6	6.32	4.13	5.88	5.56	4.47	5.48	5.08	38.34	29.05	29.43	36.96	23.25	34.84	49.06	35.17	68.85	73.42	41.07	41.41	42.82	45.96	36.31	38.92	39.81
ENSMMUG00000001387	31.77	29.67	60.11	33.08	35.37	34.61	30.37	37.02	77.89	67.59	102.25	82.71	81.08	80.7	74.36	72.06	47.05	39.7	57.54	66.52	51.6	50.94	69.5	54.4	44.55	40.05	36.76	33.43	32.36	35.76	34.25	29.68	127.12	134.08	110.77	122.34	120.16	129.33	108.71	114.24	99.53	98.76	106.13	113.08	81.03	105.52	87.68	95.86	102.03
ENSMMUG00000001388	28.69	26.04	17.99	21.63	17.05	19.29	16.71	23	6.17	4.03	8.11	6.4	7.68	7.22	8.25	7.96	5.77	4.74	7.09	8.46	6.98	5.34	6.65	6.25	8.24	8.11	13.67	14.55	16	12.12	13.81	19.92	2.33	1.55	2	1.58	1.35	1.66	1.53	1.47	9.08	9.57	12.05	12.71	9.29	9.82	8.57	12.61	11.61
ENSMMUG00000001389	2.34	3.04	0.83	1.38	0.69	0.79	1.57	2.01	0.24	0.08	0.63	0.37	0.96	2.53	0.74	0.85	0.06	0	0.22	0.31	0.61	0.48	0.19	0.57	0.86	0.69	1.86	1.82	2.04	7.62	2.26	2.94	6.83	7.85	6.76	7.96	7.17	9.11	8.13	8.68	0.32	0.17	0.2	0.44	0.5	0.77	0.9	1.03	0.35
ENSMMUG00000001390	27.14	26.05	36.51	30.22	28.64	24.38	19.17	25.34	40.31	37.02	47.7	40.61	34.98	37.49	35.36	33.49	41.27	34.01	32.97	33.46	31.67	30.26	36.39	34.09	34.98	31.69	37.87	22.49	25.71	20.31	25.69	27.39	19.75	19.66	24.49	22.75	21.53	25.69	20.7	21.56	51.89	49.31	49.9	56.9	43.53	48.61	43.93	49.34	44.91
ENSMMUG00000001391	0	0	0	0.01	0	0	0	0.01	0.01	0.01	0.01	0	0	0	0	0.01	0.02	0	0	0	0	0	0	0	0	0	0	0	0	0	0	0	0	0.02	0	0.03	0	0	0	0	0	0	0	0.02	0	0	0	0	0
ENSMMUG00000001392	2.63	2.18	2.58	2.22	2.87	2.39	2.27	2.81	3.25	3.97	4.68	4.66	5.87	5.66	5.31	6.02	3.46	3.54	5.49	4.35	5.52	5.95	4.81	7.55	3.16	3.54	3.43	2.69	3.3	3.19	2.5	3.02	8.95	8.47	9.5	8.35	8.33	9.33	7.95	10.35	3.96	5.37	7.84	6.08	8.98	6.68	8.88	8.05	2.72
ENSMMUG00000001394	1.5	2	2.02	1.91	1.64	1.82	1.51	2.08	1.94	2.24	2.49	2.8	3.1	2.8	2.76	2.91	1.38	1.4	1.9	2.38	1.59	2.15	2.18	2.22	1.51	1.75	1.46	1.8	1.79	1.95	1.77	1.44	7.95	10.58	9.85	12.3	11.35	13.12	11.76	11.83	7.47	10.61	9.1	10.25	10	8.57	9.01	9.39	7.18
ENSMMUG00000001395	0.22	0.36	0.08	0.06	0.13	0.11	0.11	0.05	0.21	0.3	0.16	0.24	0.28	0.25	0.19	0.29	0.34	0.19	0.05	0.06	0.33	0.12	0.19	0.22	0.29	0.29	0.05	0.24	0.15	0	0.17	0.22	0.24	0.2	0.16	0.12	0.11	0.23	0.22	0.24	0.45	0.35	0.47	0.63	0.55	0.17	0.67	0.51	1.06
ENSMMUG00000001397	3.32	3.21	5.16	4.79	5.22	6.01	3.63	4.04	3.33	3.37	2.91	4.14	2.81	3.05	3.75	3.47	2.42	2.59	3.36	3.55	1.94	1.79	1.9	1.7	2.87	3.67	3.32	3.59	3.9	3	3.8	3.09	75.34	75.16	82.08	66.95	51.68	54.06	60.5	44.51	8.14	13.03	10.58	12.12	7.73	9.09	10.24	7.69	12.6
ENSMMUG00000001398	0.19	0.16	0.11	0.05	0.28	0.13	0.13	0.1	0.05	0.12	0.07	0.07	0.09	0.1	0.08	0.02	0.22	0.02	0.12	0	0.03	0.16	0.08	0.01	0.12	0.1	0.04	0.05	0.05	0.04	0.29	0.03	1.13	1.09	0.36	0.62	0.41	0.27	0.15	0.38	0.86	1.27	1.47	1.11	1.22	1.1	0.79	1.64	1.55
ENSMMUG00000001399	1.97	2.76	2.28	2.13	1.84	1.81	2.3	2.5	1.25	1.89	1.69	1.34	1.44	1.07	1.62	1.15	1.21	0.64	1.04	1.04	1.07	0.61	0.83	1.06	0.99	1.13	1.33	1.06	1.23	0.74	1.7	1.14	10.37	9.69	9.23	8.73	9.72	5.74	8.14	8.35	5.03	5.95	4.38	4.67	5.14	3.09	5.22	3.89	5.58
ENSMMUG00000001400	1.29	1.37	1.59	1.45	1.6	1.33	1.47	1.65	1.32	1.16	1.03	1.58	1.43	1.13	1.13	1.54	1.33	0.83	1.57	1.18	1.1	1.32	0.72	1.54	1.43	1.14	1.39	1.79	1.55	1.47	1.44	2.05	3.68	3.05	3.23	3.64	3.44	3.97	2.84	3.6	2.03	2.24	2.6	2.38	2.69	2.37	2.47	2.29	1.97
ENSMMUG00000001401	0	0.03	0.04	0.01	0	0	0.06	0.02	0	0	0	0	0	0	0.04	0	0.02	0.12	0.03	0.03	0.07	0.02	0	0.03	0	0	0	0.03	0.02	0.15	0	0.03	0.21	0.18	0.17	0.19	0.2	0.17	0.11	0.12	0.06	0.02	0.02	0	0.02	0.01	0	0.04	0.03
ENSMMUG00000001402	0.06	0.03	0.1	0.04	0.01	0.08	0.02	0.03	0.13	0.03	0.12	0.05	0.48	0.11	0.09	0.11	0.04	0.04	0.05	0.02	0.05	0.08	0.02	0.05	0.08	0.07	0.74	0.52	0.37	0.5	0.34	0.14	2.31	1.31	0.47	0.95	0.17	0.33	0.25	0.32	0.08	0.01	0.06	0.03	0.04	0.06	0.04	0.03	0.03
ENSMMUG00000001403	3.6	4.27	3.73	3.44	2.47	2.55	2.87	2.95	4.02	3.16	4.94	4.31	5.56	5.33	5.86	5.42	5.72	5.74	4.53	5.06	6.88	5.58	7.74	5.98	4.67	5.99	5.35	5.46	5.4	6.41	3.8	6.45	9.18	9.57	6.34	9.91	10.47	13.32	11.36	10.65	8.98	6.1	7.52	8.93	9.72	8.07	8.91	9.85	5.69
ENSMMUG00000001404	46.18	53.86	50.12	62.85	58.24	66.38	51.74	52.52	30.47	34.84	30.17	32.97	24.37	30.3	29.84	26.99	30.23	27.7	22.65	26.15	22.47	24.99	33.07	21.44	29.82	32.02	35.16	41.98	50.21	43.09	45.35	49.47	91.11	103.87	98.74	106.43	105.93	120.59	123.29	115.01	32.96	25.51	28.6	32.48	25.87	29.09	31.87	28.04	38.72
ENSMMUG00000001405	40.1	43.2	50.08	49.27	37.4	30.14	42	38.81	79.66	59.47	101.55	99.92	136.75	111.78	120.01	110.28	71.87	74.39	65.52	107.91	104.06	87.61	112.43	78.8	47.89	54.11	47.6	58.11	63.87	70.74	58.09	60.24	94.82	110.94	96.53	111.37	131.38	127.02	147.18	125.01	100.37	86.66	83.24	93.19	123.01	98.88	120.58	112.65	81.71
ENSMMUG00000001407	0.86	0.98	1.35	1.34	0.7	1.05	2.88	2.68	0.17	0.14	0.72	0.54	0.58	1.39	1.06	1.21	0.95	0.31	1.21	1.24	1.1	2.49	3.54	2.37	2.05	1.5	4.04	3.95	3.17	5.42	4.78	6.93	4.71	3.83	5.72	7.91	6.14	13.73	11.48	18.46	3.74	2.41	5.95	9.17	4.44	9.67	13.39	10.34	0.83
ENSMMUG00000001408	3.01	3.03	3.49	2.92	3.76	3.18	4.12	3.1	2.8	2.4	2.85	2.6	2.57	3.14	3.38	2.67	2.83	2.95	3.32	2.84	3.27	2.66	3.39	3.03	2.63	3.15	3.16	2.66	3.08	3.12	4.28	3.57	4.95	5.67	5.21	5.88	6.3	6.22	6.34	6.16	3.84	3.69	4.35	4.05	4.77	3.62	4.06	4.39	3.53
ENSMMUG00000001409	0.01	0.05	0.05	0.03	0.01	0.01	0.02	0.03	0.03	0.02	0.03	0.02	0.04	0.03	0.02	0.01	0.02	0.02	0	0	0.03	0	0	0	0.01	0.02	0.06	0.02	0.02	0.14	0.01	0.04	0.04	0.08	0.04	0.07	0.07	0.02	0.05	0.01	0	0.03	0.01	0.02	0.04	0.02	0.04	0.11	0.01
ENSMMUG00000001410	0	0	0	0	0.01	0	0	0.02	0	0	0	0	0	0	0.03	0	0	0	0	0.01	0	0	0	0	0	0	0	0	0.06	0	0	0	0	0.03	0.01	0.01	0.01	0.01	0	0	0.02	0	0	0.01	0.02	0.02	0	0	0
ENSMMUG00000001411	0	0	0	0	0	0	0	0	0	0	0	0	0	0	0	0	0	0	0	0	0	0	0	0	0	0	0	0	0	0	0	0	0.36	0.4	0.48	0.44	0.27	0.33	0.24	0.35	0.11	0.05	0.32	0.11	0.17	0.12	0.19	0.08	0.19
ENSMMUG00000001413	5.35	5.01	5.33	4.06	2.84	3.16	3.48	4.06	4.12	3.1	4.06	3.28	4.08	4.63	3.39	3.84	3.51	3.13	4.38	4.56	3.63	4.56	4.49	4.64	4.39	4.41	6.77	4.97	5.72	8.08	5.12	6.71	6.82	6.29	6.2	7.02	8.78	7.88	8.81	8.96	4.45	5.82	5.73	5.94	5.65	6.11	5.66	6.28	6.17
ENSMMUG00000001414	28.56	28.02	34	26.71	22.86	21.84	18.77	21.82	33.33	25.38	33.15	30.86	26.94	27.36	28.27	27.21	31.15	28.05	25.76	29.71	23.68	23.89	25	27.61	30.65	27.09	29.29	24.25	27.76	24.75	24.46	32.18	26.8	23.79	22.89	25.18	26.75	25.98	22.83	27.1	35.83	31.71	32.02	32.01	23.19	24.88	24.43	26.23	40.8
ENSMMUG00000001415	0.02	0.16	0.22	0.04	0.01	0.04	0.08	0.13	0.05	0.03	0.06	0.12	0.1	0	0.05	0.07	0.01	0.02	0.11	0.03	0.03	0.09	0.08	0.03	0.09	0.09	0.12	0	0.13	0.2	0.1	0.07	0.27	0.59	0.24	0.35	0.28	0.53	0.25	0.6	0.03	0	0.18	0.13	0.22	0.1	0.42	0.25	0.26
ENSMMUG00000001416	15.46	15.4	19.27	18.91	18.15	12.22	12.98	16.56	14.5	17.53	15.86	15.65	16.64	13.46	15.23	14.42	14.36	14.41	16.03	20.74	21.32	15.58	14.67	15.56	11.52	12.09	12.97	13.09	17.96	12.94	13.91	14.5	14.17	13.75	14.02	16.75	22.7	14.36	14.95	17.81	14.76	17.3	15.84	17.6	25.07	15.86	17.83	18.01	23.71
ENSMMUG00000001417	0	0	0	0	0	0	0	0	0.02	0	0	0	0	0	0	0	0	0	0	0.01	0	0	0	0	0	0	0	0	0	0	0	0	0	0	0.03	0.02	0	0	0.02	0.02	0	0	0	0	0	0	0	0	0
ENSMMUG00000001418	0.05	0.07	0.03	0.08	0.01	0.11	0.09	0.06	0.03	0.09	0.01	0.01	0.11	0.05	0.08	0.14	0	0.07	0.07	0.06	0.02	0.02	0.06	0.03	0.05	0.1	0.05	0.06	0.1	0.05	0.08	0.03	0.16	0.14	0.22	0.09	0.2	0.08	0.11	0.06	0.07	0.07	0.1	0.03	0.08	0.06	0.05	0.1	0.16
ENSMMUG00000001420	0.36	0.45	0.09	0.17	0.21	0.09	0.15	0.11	0.71	0.44	1.05	0.86	1.13	0.77	0.69	0.99	0.95	0.79	0.43	1.23	0.41	0.94	0.53	0.17	0.17	0.29	0.43	0.19	0.42	0.41	0.09	0.25	1.42	1.24	0.9	0.83	0.94	0.74	0.97	0.96	0.83	1.08	0.72	0.36	0.79	0.49	0.74	0.88	0.68
ENSMMUG00000001421	0.99	0.87	0.78	1.19	1.26	1.09	1.19	1	2.24	2.9	2.17	2.17	2	1.87	2.45	2.12	3.03	3.24	1.92	2.49	1.92	2.88	3.02	2.43	1.97	2.25	1.55	1.01	1.61	1.02	1.64	1.06	0.53	0.51	0.49	0.59	0.44	0.44	0.54	0.48	3.21	3.65	3.95	3.17	3.98	3.12	4.48	3.76	2.48
ENSMMUG00000001422	0	0.01	0.01	0.01	0	0	0	0	0	0	0.02	0	0	0	0	0	0.01	0.02	0.01	0.02	0.01	0	0	0	0	0	0.04	0.02	0	0	0.05	0	0.02	0.01	0	0.07	0	0.06	0.02	0	0	0	0	0.01	0	0	0	0	0
ENSMMUG00000001423	4.11	3.9	5.43	4.57	7.62	5.28	4.28	5.55	4.78	6.79	4.3	4.61	4.44	3.37	4.01	3.45	4.68	5.4	4.16	4.25	4.84	3.37	3.11	3.67	4.73	4.42	3.65	3.17	3.5	2.45	3.24	2.74	17.66	16.32	15.11	16.4	14.89	11.74	13.68	14.54	12.83	15.25	12.93	11.87	12.36	10.62	10.03	11.32	9.29
ENSMMUG00000001424	0.61	0.77	0.81	1.1	1.25	1.39	0.92	0.91	1.18	1.23	1.26	1.17	1.09	1.34	1.29	1.16	0.78	0.44	0.73	1.16	0.77	0.94	0.87	0.53	0.46	0.58	0.55	0.84	0.98	0.41	0.7	0.58	29.36	29.76	32.22	30.23	27.38	31.97	28.73	29.16	20.5	19.15	20.35	15.87	15.68	18.5	14.91	15.87	10.02
ENSMMUG00000001425	0.02	0.01	0.05	0.05	0.05	0.01	0.02	0.05	0	0.01	0	0.01	0	0	0	0.01	0.05	0	0.02	0.03	0	0.01	0	0.01	0.06	0.03	0	0.01	0	0.05	0.08	0	0.59	0.32	1.29	0.69	0.79	0.68	1.91	1	0.01	0.01	0	0.04	0	0.01	0	0.02	0.02
ENSMMUG00000001426	1.62	1.93	1.91	2.16	2.06	2.13	1.7	2.37	3.14	2.95	5.95	4.17	3.98	5.16	3.64	3.91	3.36	2.25	6.08	5.06	4.4	5.5	9.43	4.7	2.01	1.87	1.77	2.03	2.31	1.99	2.37	1.53	43.08	58.12	50.47	44.36	38.18	43.06	42.04	37.69	13.01	11.79	17.17	15.21	12.69	18.46	12.2	13.01	7.67
ENSMMUG00000001427	10.11	11	7.42	8.95	9.39	9.04	13.27	12.1	6.79	6.05	12.31	10.22	13.93	16.83	16.78	12.95	7.41	6.53	10.41	8.51	12.22	15.51	21.27	14.73	9.43	10.2	13.8	10.94	16.69	23.06	18.36	14.72	17.62	23.45	21.24	23.53	26.83	33.98	31.69	27.29	14.8	12.24	16.5	18.21	18.81	22.89	22.49	21.54	7.55
ENSMMUG00000001428	0	0.01	0	0	0	0.01	0	0	0	0	0	0.07	0	0	0	0.02	0	0.05	0	0.01	0	0	0	0	0.02	0.02	0.06	0.04	0.02	0	0	0	0.05	0.02	0.02	0	0	0	0	0	0	0	0.01	0.02	0	0	0	0	0
ENSMMUG00000001432	1.79	1.34	1.64	1.75	1.56	1.77	1.64	1.69	1.6	1.81	2.02	2.44	2.31	2.32	2.49	1.95	1.16	0.78	1.74	1.9	1.3	2.04	1.62	2.04	1.38	1.24	1.23	1.36	1.58	2.33	1.55	1.44	4.52	5.1	5.75	6	4.68	6.45	6.3	4.81	12.91	13.46	13.48	13.56	12.53	18.59	12.47	14.53	9.18
ENSMMUG00000001433	1.39	1.3	2.21	1.11	0.55	0.71	0.73	0.8	2.69	2.35	3.28	2.4	2.39	2.63	3.18	3.01	1.59	2.2	2.32	2.21	2.58	2.26	3.43	2.49	1.63	1.63	1.57	0.98	1.12	1.28	1.46	1.26	1.32	0.89	1.41	1.14	1.64	1.64	1.19	1.85	3.1	2.25	3.19	2.66	3.75	3.68	3.24	2.85	3.26
ENSMMUG00000001434	6.76	6.41	5.23	5.45	5.7	6.4	4.25	5.23	7.6	6.35	5.27	6.01	6.01	4.86	6.35	6.18	5.1	4.39	3.81	5.36	4.53	4.57	4.43	4.71	5.45	5.56	3.65	4.13	4.66	4.62	4.68	3.3	13.56	14.63	10.89	12.27	14.56	12.08	13.6	13.44	11.52	11.23	9.6	10.57	9.87	9.6	10.33	11.32	8.22
ENSMMUG00000001435	0.05	0.01	0.06	0.02	0.02	0.05	0.08	0.02	0.05	0.01	0	0.06	0.03	0.04	0.01	0.01	0.03	0.04	0	0.03	0.06	0.05	0.01	0	0.06	0.01	0.03	0.06	0	0.02	0.04	0	0.05	0.07	0.04	0.04	0.1	0.11	0.08	0.01	0.03	0.02	0.05	0.07	0.07	0.05	0	0.07	0.01
ENSMMUG00000001436	1.32	1.57	1.49	1.44	1.6	1.53	1.17	1.59	1.2	1.33	1.28	1.38	1.14	1.12	1.35	1.34	1.04	1.06	1.27	1.51	1.05	0.84	1.02	1.09	0.97	1.26	0.92	1.06	0.89	0.91	1.2	1.39	3.64	3.69	3.21	3.44	3.73	2.9	3.08	4.02	2.8	2.86	3.13	3.05	3.39	2.25	3.37	2.79	2.9
ENSMMUG00000001437	0	0	0	0	0	0	0	0	0	0	0	0	0	0	0	0	0	0	0	0	0	0	0	0	0	0	0	0	0	0	0	0	0	0	0	0	0	0	0	0.03	0	0	0	0	0	0	0	0	0
ENSMMUG00000001438	0	0.02	0	0	0	0	0	0	0	0	0.04	0	0	0	0	0	0.02	0	0.02	0	0	0.02	0	0	0.03	0	0.08	0.04	0	0	0.1	0	0.2	0.12	0.26	0	0.12	0	0	0	0.12	0	0	0	0	0	0.11	0.06	0
ENSMMUG00000001439	0.05	0.04	0	0.04	0	0.02	0.02	0.09	0	0.03	0	0	0.11	0	0.03	0	0.02	0	0	0	0.02	0	0	0	0.06	0.06	0	0	0	0	0	0	0.03	0.03	0.06	0.05	0.08	0	0.11	0.1	0.07	0.06	0.02	0.06	0	0.02	0	0.16	0
ENSMMUG00000001440	0	0	0	0	0	0	0	0	0	0	0	0.05	0	0	0	0.04	0	0	0	0.08	0	0	0	0	0	0	0.05	0	0	0	0	0	0	0.03	0	0	0	0.05	0	0	0	0	0	0	0	0	0	0.04	0
ENSMMUG00000001441	0	0	0	0	0	0	0	0	0	0	0	0	0	0	0	0	0	0	0	0	0	0	0	0	0	0	0	0	0	0	0	0	0	0	0	0	0	0	0	0	0	0.09	0	0	0	0	0	0	0
ENSMMUG00000001442	0	0	0	0	0.01	0.01	0	0	0.02	0.02	0	0	0.02	0	0.04	0	0.01	0.09	0.01	0	0	0	0	0	0	0.02	0	0	0.04	0	0	0.03	0.02	0	0.05	0	0	0.06	0.04	0	0.03	0.03	0	0.04	0.16	0	0	0.02	0
ENSMMUG00000001443	4.19	5.24	4.96	4.03	3.27	3.42	2.78	3.5	4.88	3.05	4.12	4.48	3.59	3.45	4.06	4.03	3.91	3.6	4.38	4.67	3.86	3.79	2.52	4.06	4.69	4.68	5.5	5.65	4.04	4.34	4.03	5.87	9.3	8.02	7.7	7.52	6.35	5.7	6.89	7.54	6.76	6.68	7.34	5.39	6.08	5.51	7.22	6.73	5.59
ENSMMUG00000001444	0	0	0	0	0	0	0	0	0	0	0	0.04	0	0	0	0	0	0	0	0	0	0	0	0	0	0	0	0	0	0	0.1	0	0	0	0	0	0	0	0	0	0	0	0	0	0	0	0	0	0
ENSMMUG00000001445	0	0.02	0	0	0	0	0	0.05	0	0.03	0	0	0	0	0	0	0	0.1	0.05	0	0	0.03	0	0.06	0.2	0	0	0	0	0	0.05	0	0	0.06	0	0.06	0.09	0.03	0	0.08	0	0	0	0	0	0	0	0.03	0
ENSMMUG00000001454	74.97	75.27	73.61	68.37	56.51	53.77	52.56	52.66	72.94	60.29	87.41	81.77	89.91	93.52	85.73	75.31	75.61	71.06	73.42	82.86	92.96	85.29	108.9	74.45	72.33	66.67	59.92	76.65	83.33	79.69	69.54	64.29	56.84	59.59	56.35	66.22	75.83	80.77	69.9	61.49	86.33	69.02	80.89	86.02	87.26	87.54	73.85	79.04	85.96
ENSMMUG00000001456	5.35	5.54	6.13	5.67	6.1	6.54	4.94	5.28	3.98	2.94	5.74	5.86	4.79	6.1	5.38	7.17	3.59	3.07	4.6	4.92	4.55	5.67	3.42	5.18	4.01	4.19	3.81	4.38	4.04	5.45	4.45	4.17	22.96	23.56	23.47	29.4	24.41	27.78	24.63	27.29	10.61	10.35	12.73	11.85	12.67	13.44	12.75	13.49	7.76
ENSMMUG00000001457	8.01	7.4	7.99	8.32	8.76	10.27	14.53	9.48	7.73	7.83	4.7	7.36	5.25	5.18	8.09	6.1	5.17	4.61	5.14	5.52	4.16	4.97	3.8	4.05	6.66	7.13	4.66	5.24	4.73	6.2	9.27	6.96	8.77	8.6	7.23	7.62	6.61	6.92	10.1	7.98	9.28	10.42	8.22	8.76	8.97	7.56	12	8.07	9.64
ENSMMUG00000001458	5.23	4.3	7.33	4.43	3.3	2.93	3.97	4.01	6.91	3.93	9.45	6.32	6.91	6.86	7.38	8.39	5.74	4.42	6.74	7.45	6.01	7.08	5.53	6.23	5.73	5.09	9.35	6.67	5.67	9.09	6.14	8.93	5.21	5.39	5.42	5.55	5.58	5.49	5.46	6.67	7.16	4.21	8.09	6	6.3	6.92	8.43	7.11	6.18
ENSMMUG00000001459	27.71	23.84	28.3	24.46	19.69	19.04	19.02	19.93	36.3	24.35	31.44	31.95	34.47	34.69	34.62	30.35	32.22	24.75	23.56	31.47	31.8	25.05	36.49	27.07	30.26	26.04	30.16	29.63	35.33	35.85	29.46	34	36.61	34.02	34.55	42.38	50.84	52.62	43.61	47.21	46.24	30.96	32.87	39.56	42.06	35.98	42.82	36.47	47.14
ENSMMUG00000001460	160.28	170.67	173.52	160.58	139.98	126.39	145.97	140.14	173.42	148.26	214.04	185.68	183.77	197.25	227.53	187.69	165.09	143.1	148.74	184.65	181.67	165.3	233.05	185.1	132.71	140.45	190.07	151.84	162	184.13	171.31	183.38	128.58	140.93	129.25	135.24	136	159.04	143.07	146.82	187.63	167.18	189.33	206.91	194.34	208.41	247.25	206.86	170.92
ENSMMUG00000001461	7.74	6.93	8.08	7.97	9.21	10.07	8.22	10.19	6.8	8.15	6.67	8.9	7.73	7.91	9.48	8.61	4.64	4.4	7.31	7.67	6.82	6.29	6.29	6.82	5.5	5.17	5.37	5.43	4.19	4.89	7.21	5.63	7.66	6.24	8.81	8.36	7.78	7.35	8.07	8.65	5.59	7.29	9.39	9.29	8.11	7.87	10.09	9.84	7.04
ENSMMUG00000001462	8.08	8.29	8.83	7.76	9.98	7.9	9.72	10.14	7	9.88	5.97	7.09	6.16	4.89	7.61	6.7	5.54	6.14	7.49	5.98	5.8	4.26	5.35	5.33	7.02	8.14	6.72	5.93	5.8	4.51	8.57	6.88	19.68	20.84	27.28	21.11	21.35	14.77	17.09	17.87	13.17	15.5	16.97	15.53	16.27	12.52	16.98	14.27	13.04
ENSMMUG00000001463	1.31	1.16	1.52	1.01	0.74	1.06	1.25	1.27	1.4	0.58	1	0.74	0.75	0.68	0.7	0.84	1.83	0.99	1.22	1.07	1.17	1.28	1.26	1.22	1.86	1.81	3.6	3.07	1.98	4.02	2.44	3.23	5.04	3.57	3.93	3.43	3.38	3.49	3.35	3.9	3.34	2.77	3.86	3.5	3.41	3.77	4.39	3.72	4.21
ENSMMUG00000001464	0.14	0.19	0.05	0.38	0.09	0.2	0.05	0.12	0.11	0.14	0.07	0.16	0.01	0	0.02	0.01	0.1	0.05	0.04	0	0.03	0	0.02	0	0.16	0.03	0.22	0.43	0.16	0.14	0.15	0.16	0.01	0.08	0.05	0.06	0	0.01	0.01	0.05	0.01	0.02	0	0.07	0	0.01	0.01	0.01	0.06
ENSMMUG00000001465	0.04	0.08	0	0	0.02	0.05	0	0	0.02	0	0.06	0	0	0	0	0.05	0	0	0	0	0	0	0	0.02	0.02	0.05	0	0.03	0	0.42	0	0	0	0	0	0	0	0	0	0	0.03	0	0	0.07	0	0	0.04	0	0.05
ENSMMUG00000001466	0.01	0.02	0	0.04	0.02	0.09	0.04	0.04	0.06	0.1	0.08	0	0.06	0.08	0.09	0.15	0.02	0.01	0.04	0.09	0.1	0.04	0.02	0.03	0.05	0.07	0.04	0	0	0.03	0.13	0.1	0.09	0.13	0.14	0.07	0.05	0.04	0.05	0.08	0.12	0.06	0.06	0.07	0.2	0.06	0.08	0.25	0.02
ENSMMUG00000001467	0.37	0.23	0.08	0.09	0.15	0.19	0.21	0.25	2.33	1.25	2.26	1.87	2.89	3.01	1.13	1.82	1.7	1.6	1.07	1.69	1.76	2.82	0.57	0.41	0.42	0.51	0.19	0.15	0.14	0.45	0.13	0.18	1.11	0.98	0.48	0.8	1.02	0.63	0.4	0.44	1.99	1.39	0.72	0.49	1.7	1.4	0.57	1.16	2.07
ENSMMUG00000001468	0.54	0.69	0.65	0.66	1.31	1.3	1.5	0.78	0.99	0.7	0.82	0.55	0.7	0.84	0.55	1.02	0.6	1.16	0.89	0.59	0.67	1.2	0.29	0.86	0.93	1.35	0.67	0.82	0.69	0.62	0.73	0.61	0.69	0.97	0.73	0.76	0.59	0.75	1.02	0.82	0.71	1.01	0.82	0.78	0.57	0.97	0.53	0.77	0.64
ENSMMUG00000001469	0	0.05	0.02	0.02	0.03	0.05	0	0.07	0	0.04	0.02	0.02	0.04	0.04	0	0.06	0.09	0	0.06	0.01	0	0.01	0.03	0	0.02	0.02	0	0.03	0.03	0	0.06	0	0.08	0.02	0	0.05	0.03	0.01	0.03	0.07	0.14	0.03	0.04	0.02	0	0.02	0	0.1	0.07
ENSMMUG00000001470	0	0	0	0	0	0	0	0	0	0	0	0	0	0	0	0	0	0	0	0	0	0	0	0	0	0	0	0	0	0	0	0	0	0.04	0	0	0	0	0	0	0	0	0	0	0	0.02	0	0	0
ENSMMUG00000001471	7.2	7.56	9.56	7.88	7.65	8.78	5.96	7.79	12.99	13.3	15.1	14.99	12.53	11.68	11.46	12.37	6.92	5.88	7.85	9.46	6.96	6.83	9.21	7.69	7.3	7.34	6.68	6.99	6.59	6.08	7.27	6.35	84.12	94.47	59.73	74.82	70.63	61.43	61.43	51.42	136.45	137.47	106.79	99.51	89.41	111.44	85.53	99.54	62.8
ENSMMUG00000001472	0.14	0.11	0.19	0.17	0.14	0.2	0.07	0.21	0.23	0.17	0.14	0.22	0.18	0.15	0.11	0.22	0.11	0.1	0.13	0.19	0.08	0.1	0.19	0.19	0.23	0.12	0.18	0.16	0.15	0.37	0.19	0.15	21.61	23.81	23.61	22.62	18.68	20.39	18.92	20.18	14.91	17.89	18.53	17.14	13.4	15.28	15.34	15.75	15.07
ENSMMUG00000001473	0.02	0	0.17	0.06	0.2	0.04	0.34	0.17	0.42	0.13	0.34	0.13	0.94	1.86	0.7	1.28	0.29	0.62	0.5	0.17	1.73	2.52	0.87	0.46	0.07	0.1	0.03	0.02	0.18	0.06	0.13	0.19	0.09	0.26	0.25	0.01	0.35	0.18	0.33	0.39	0.55	0.28	0.2	0.37	0.87	2.19	0.24	0.76	0.52
ENSMMUG00000001475	52.51	52.47	40.74	48.38	40.39	40.99	39.89	44.09	25.01	25.24	25.48	21.78	21.81	24	25.52	22.91	16.4	14.87	17.61	16.98	17.03	13.98	17.9	19.44	17.48	19.41	23.99	30.47	29.5	25.28	32.19	26.17	39.82	30.93	34.13	31.17	27.63	28.21	29.69	20.66	24.09	25.13	25.48	31.2	24.61	24.9	34.26	24.94	49.6
ENSMMUG00000001476	12.46	12.9	12.02	10.58	7.52	8.42	6.88	7.87	10.79	9.11	12.25	13.55	13.55	12.68	14.78	11.69	13.79	12.58	8.48	13.13	11.59	11.25	17.48	11.56	9.75	13.77	12.36	14.19	13.04	16.55	13.13	10.6	16.98	21.73	18.14	19.4	16.83	21.09	19.84	18.33	16.62	12.8	16.51	16.59	15.31	15.95	15.5	12.93	14.04
ENSMMUG00000001477	0	0	0	0	0	0	0	0	0	0	0	0	0	0	0	0	0.04	0	0	0	0	0	0	0.14	0	0	0	0	0	0	0	0	0	0	0	0	0.15	0	0	0	0	0.04	0	0	0	0	0	0	0
ENSMMUG00000001478	0.09	0.12	0.07	0.1	0.14	0.15	0.1	0.11	0.06	0.07	0.14	0.12	0.04	0.02	0.08	0.06	0.13	0.12	0.07	0.08	0.1	0.11	0.04	0.06	0.08	0.07	0.08	0.02	0.03	0.02	0.08	0.07	0.09	0.03	0.06	0.07	0.06	0.04	0.09	0.08	0.17	0.16	0.1	0.05	0.11	0.06	0.11	0.07	0.02
ENSMMUG00000001479	0.12	0.33	0.09	0.03	0.05	0.02	0.03	0.09	0.23	0.17	0.12	0.08	0.09	0.04	0.04	0.09	0.09	0.09	0.13	0.11	0.11	0.02	0.1	0.03	0.05	0.09	0.03	0.05	0.07	0.08	0.14	0.09	0.25	0.14	0.13	0.11	0.17	0.11	0.1	0.06	0.12	0.19	0.34	0.1	0.18	0.22	0.11	0.16	0.13
ENSMMUG00000001480	0.42	0.55	0.78	0.52	0.39	0.36	0.66	0.52	0.46	0.41	0.59	0.56	0.43	0.48	0.49	0.48	0.3	0.31	0.43	0.79	0.45	0.59	0.71	0.38	1.24	1.09	1.69	1.64	1.58	1.92	1.49	2.01	1.86	1.74	1.53	1.51	1.54	1.38	1.5	1.7	1.17	1.03	1.46	1.92	1.4	1.54	2.51	2.33	1.1
ENSMMUG00000001481	6.92	6.8	8.13	6.49	5.99	7.78	4.77	8.1	8.57	10.31	12.64	10.76	10.88	12.62	10.14	11.98	5.23	4.29	7.7	8.69	4.77	6.34	9.16	6.83	6.39	5.54	5.42	7.03	4.79	6.64	7.15	7.71	266.97	246.76	193.37	223.04	190.5	189.55	186.89	186.43	102.45	104.1	81.03	83.55	67.2	82.99	76	79.51	59
ENSMMUG00000001482	16.38	14.37	12.59	15.24	11.04	13.73	10.63	11.81	14.27	10.28	11.64	13.84	12.06	15.96	15.32	11.62	11.54	9.2	8.81	12.94	10.13	11.98	14.86	9.93	11.84	9.46	11.49	11.95	12.74	13.22	12.36	12.25	15.23	13.47	11.33	14.52	13.98	18.46	15.09	12.61	15.76	11.9	12.37	14.63	11.5	14.69	12.69	12.49	14.41
ENSMMUG00000001483	2.73	2.63	2.15	2.42	2.11	2.3	2	2.06	2.94	2.23	2.82	2.61	3.28	3.87	4.29	2.93	2.54	1.99	2.2	2.55	2.19	2.93	3.4	2.24	2.2	2.06	2.24	2.06	2.37	3.27	2.25	2.74	3.41	3.54	2.82	4.53	4.37	6.07	4.29	4.64	4.25	3.56	3.82	4.07	3.66	4.88	4.57	4.86	3.33
ENSMMUG00000001484	4.36	4.95	6.81	5.34	3.61	3.83	5.09	5.69	3.54	2.23	4.21	3.91	3.71	3.82	4.01	4.3	3.34	3.43	5.63	4.44	4.17	4.34	4.91	6.89	9.32	9.12	13.4	11.33	7.62	10.41	10.38	13.29	20.24	17.85	19.22	18.13	21.09	14.54	17.19	21.24	15.26	18.79	22.55	24.35	19.58	20.32	25.73	23.2	13.43
ENSMMUG00000001485	0.21	0.42	0.35	0.21	0.49	0.38	0.37	0.48	0.64	0.91	1.29	0.85	0.43	0.34	0.73	0.65	0.22	0.54	0.65	0.37	0.17	0.17	0.36	0.32	0.55	0.18	0.45	0.27	0.34	0.41	0.41	0.27	0.71	0.24	0.21	0.22	0.27	0.1	0.55	0.39	4.42	3.29	3.54	1.75	1.6	1.55	1.27	1.8	2.51
ENSMMUG00000001487	0.2	0.12	0.1	0.12	0.29	0.06	0.24	0.27	0.22	0.42	0.12	0.16	0.26	0.17	0.15	0.23	0.3	0.2	0.34	0.21	0.22	0.28	0	0.22	0.38	0.27	0.27	0.56	0.25	0.08	0.09	0.09	0.1	0	0.01	0.06	0	0	0.02	0.11	0.81	0.33	0.34	0.2	0.03	0.33	0.55	0.13	0.3
ENSMMUG00000001489	0.09	0	0	0	0	0	0.02	0.02	0.03	0	0	0	0	0	0	0.03	0.14	0	0	0	0	0	0	0	0	0	0.08	0	0	0	0	0	0	0	0.03	0.03	0	0	0.11	0	0	0	0	0	0	0	0	0	0.03
ENSMMUG00000001490	0	0	0.03	0	0.01	0.02	0	0.01	0	0.03	0.02	0	0	0	0	0	0	0	0.02	0	0	0	0	0	0.03	0	0	0	0	0.02	0	0	0	0.02	0	0	0	0.02	0	0	0	0	0	0	0	0	0	0	0
ENSMMUG00000001491	0	0	0	0	0.02	0	0	0.03	0	0	0.02	0	0	0	0	0.01	0.05	0	0.01	0	0	0.01	0	0	0	0	0	0	0	0	0	0	0	0.04	0	0.03	0.03	0.03	0.08	0	0.01	0.01	0	0	0	0	0	0	0
ENSMMUG00000001492	0.02	0.01	0	0.02	0.01	0	0	0	0.01	0	0	0	0	0	0	0	0	0.02	0.01	0	0.01	0	0.01	0.01	0	0.01	0	0.06	0	0.01	0.01	0	0.01	0.01	0.01	0.02	0.03	0	0	0.01	0	0	0	0.02	0	0	0	0	0.01
ENSMMUG00000001493	0	0.01	0	0	0	0	0	0.01	0	0	0	0	0	0	0	0	0	0	0	0	0	0	0	0.08	0	0	0.02	0	0	0	0	0	0	0	0.01	0	0	0.06	0.02	0.04	0	0.01	0	0	0	0	0	0	0
ENSMMUG00000001494	0	0.01	0	0	0	0	0	0.01	0	0	0.02	0	0.02	0.02	0.01	0.01	0	0.01	0.05	0.01	0.01	0	0	0	0.01	0.01	0	0	0	0	0	0	0.02	0.02	0.04	0	0	0.01	0.02	0	0	0.02	0.07	0	0	0	0	0	0
ENSMMUG00000001495	0.05	0.02	0.04	0.02	0.07	0.04	0.07	0.03	0.05	0.03	0.08	0.04	0.03	0.01	0.04	0.02	0.04	0.03	0.05	0.04	0.05	0.09	0.04	0.06	0.07	0.11	0.03	0.05	0.02	0.04	0.08	0.11	0.09	0.06	0.04	0.01	0.03	0.03	0.07	0.05	0.06	0.09	0.02	0.01	0.04	0.02	0.03	0.02	0.03
ENSMMUG00000001496	0.19	0.11	0.1	0.1	0.16	0.4	0.35	0.32	0.12	0.24	0.07	0.14	0.11	0.28	0.09	0.13	0.12	0.07	0.18	0.08	0.07	0.23	0.01	0.13	0.11	0.3	0.21	0.04	0.06	0.37	0.2	0.15	0.78	0.91	2.79	1.18	1.18	1.18	1.02	0.73	0.68	1.09	1.29	0.78	0.92	1.16	0.34	0.41	1.05
ENSMMUG00000001497	0.01	0	0.03	0	0	0.01	0.01	0	0.02	0.01	0	0	0.01	0.01	0	0.01	0	0.02	0.01	0.01	0.03	0	0.01	0.02	0	0.02	0.08	0.02	0	0.02	0.02	0.03	0.04	0.01	0.01	0	0.01	0.05	0	0.02	0	0.01	0.01	0.01	0	0.01	0	0	0
ENSMMUG00000001498	0.4	0.17	0.61	0.49	0.12	0.05	0.21	0.33	0.51	0.24	1.63	1.28	1.85	1.69	1.28	1.41	0.67	0.57	1.55	1.49	0.36	1.14	1.25	0.89	0.37	0.58	0.74	0.4	0.61	0.6	0.39	0.51	0.54	0.8	1.28	1.16	0.77	1.14	1.17	1.15	0.63	0.39	1.48	0.85	1.08	1.41	0.93	1.11	0.8
ENSMMUG00000001499	0	0.02	0	0.02	0.01	0.02	0.01	0.01	0	0	0.04	0.02	0.03	0	0.02	0.02	0	0	0	0	0	0.01	0.01	0.03	0.01	0	0	0.01	0.02	0.03	0	0.02	0.01	0	0	0.01	0	0.03	0.04	0.01	0.01	0.01	0	0.01	0	0.01	0	0	0
ENSMMUG00000001500	2.25	1.59	2.36	2.27	2.04	1.58	1.54	1.91	2.31	1.78	3.15	2.44	2.65	2.13	2.87	2.47	2.06	1.55	2.15	2.3	2.57	1.91	2.75	2.32	2.37	2.14	3.47	2.95	2.22	2.11	2.34	2.71	2.87	3.53	2.57	2.75	3.13	2.71	3.22	2.95	2.96	2.95	3.23	2.68	2.4	1.84	2.68	2.57	2.53
ENSMMUG00000001502	0	0.02	0.03	0	0.01	0.01	0.02	0	0.1	0.09	0.09	0.13	0.18	0.12	0.07	0.09	0.14	0.05	0	0.11	0.18	0.09	0.08	0.01	0.06	0.07	0.02	0.02	0.06	0.15	0	0	0.04	0.01	0.05	0.04	0	0.02	0	0.03	0.08	0.02	0.03	0.12	0.11	0.1	0.07	0	0.12
ENSMMUG00000001503	0.14	0.01	0.38	0.01	0	0.04	0.01	0.1	0.49	0.79	0.56	0.52	0.63	0.36	0.61	0.49	0.31	0.04	0.07	0.06	0.04	0.05	0.2	0.22	0.62	0.32	0.29	0.05	0.02	0.08	0.19	0.03	0	0	0.03	0.02	0	0	0	0.01	0.06	0.31	0.27	0.19	0.13	0.12	0.21	0.39	0.27
ENSMMUG00000001505	0	0.01	0.03	0	0.02	0.01	0	0.01	0.01	0.01	0.01	0.01	0	0.01	0.01	0.01	0.02	0	0.03	0	0	0.02	0.03	0	0	0.07	0.01	0.01	0.01	0.01	0	0	0	0.03	0.07	0.05	0.01	0.01	0.01	0.02	0	0.01	0	0.02	0	0	0	0.02	0.01
ENSMMUG00000001507	15.96	18.39	18.34	17.43	19.16	19.82	16.64	19	18.69	22.12	21.96	21.35	20.7	22.58	22.85	22.39	15.81	16.84	19.72	19.5	16.9	16.63	20.72	19.11	15.86	18.43	17.27	14.67	12.62	17.25	18.64	14.2	28.35	34.98	27.09	30.96	26.36	29.18	25.46	30.9	26.33	32.69	30.82	33.62	27.17	28.89	30.94	30.65	23.07
ENSMMUG00000001508	0.59	0.66	0.74	0.64	0.94	0.72	0.53	0.67	0.66	0.84	0.58	0.61	0.79	0.86	0.78	0.72	0.54	0.62	0.67	0.62	0.69	0.78	0.62	0.55	0.84	0.66	0.75	0.45	0.43	0.53	0.49	0.52	10.84	10.73	9.76	10.76	9.65	10.19	9.93	12.59	8.77	9.23	7.34	7.79	7	9.92	8.05	8.91	5.9
ENSMMUG00000001509	29.09	27.74	29.47	26.94	26.64	23.68	21.11	24.45	24.99	21.74	27.44	25.18	24.35	22.89	24.37	24	17.93	16.54	21.76	22.46	20.17	18.7	20.9	21.9	18.27	18.4	24.76	20.95	20.05	18.47	22.11	18.91	24.55	23.58	24.77	22.94	24.25	22.58	20.21	26.25	21.73	22.95	25.11	25.16	20.92	20.79	25.69	23.07	24.45
ENSMMUG00000001510	0.01	0	0.01	0.01	0.01	0.02	0	0	0.01	0.01	0	0.02	0.01	0.06	0	0.02	0.04	0.01	0	0.01	0	0	0.01	0	0	0.01	0.03	0.01	0.02	0	0.01	0	0.03	0.01	0.03	0.01	0	0	0.01	0.03	0.01	0.02	0.01	0	0	0	0.02	0	0
ENSMMUG00000001511	0.04	0.01	0	0.02	0.03	0.04	0.03	0.04	0.05	0.01	0.01	0.04	0.04	0.01	0.03	0.02	0.04	0.01	0	0	0	0	0.02	0	0.04	0.04	0.03	0.03	0.02	0.02	0.07	0	0.01	0.02	0.01	0.01	0.04	0.01	0.05	0.02	0.08	0.01	0.03	0	0.02	0	0.06	0.02	0.02
ENSMMUG00000001513	5.87	7.13	6.64	5.88	5.69	5.98	5.19	6.21	7.73	8.73	6.18	7.05	4.76	5.51	5.5	5.29	6.91	6.83	5.1	5.97	4.03	3.99	4.75	4.07	7.41	8.7	9.17	7.86	9.15	8.23	9.15	9.27	1.03	1.22	1.09	0.95	0.88	1.11	1.05	0.99	12.35	13.26	10.02	9.41	7.75	10.99	9.03	9.55	12.46
ENSMMUG00000001514	0.08	0.11	0.12	0.14	0.16	0.24	0.05	0.07	0.04	0.12	0.08	0.1	0.07	0.11	0.05	0.04	0.05	0.07	0.07	0.06	0.03	0.1	0.09	0.03	0.04	0.09	0.06	0.09	0.01	0.04	0.08	0.05	0.17	0.27	0.14	0.18	0.3	0.33	0.22	0.25	0.03	0.12	0.14	0.1	0.12	0.08	0.05	0.13	0.03
ENSMMUG00000001515	5.7	5.6	5.12	5.79	5.24	5.43	4.48	5.79	5.13	5.18	5.57	5.97	4.78	5.1	5.61	5.76	4.14	3.69	4.91	5.28	4.37	3.95	4.71	4.94	4.5	4.19	4.33	4.58	3.78	3.58	4.37	4.24	8.57	9.26	7.48	8.46	8.54	8.35	8.51	8.46	7.1	7.74	8.15	8.3	5.93	6.08	7.11	6.77	6.33
ENSMMUG00000001516	9.07	8.46	9.45	7.29	6.51	6.14	6.59	7.48	8.47	7.15	8.56	8.46	8.07	8.21	9.31	9.22	7.09	6.81	9.1	9.06	8.62	7.12	7	7.66	9.07	8.86	10.26	8.45	7.29	8.21	8.42	9.07	17.3	16.26	15.53	13.14	13.77	14.16	14.2	16.05	8.39	10.34	10.03	10.41	9.66	10.13	10.08	10.31	9.19
ENSMMUG00000001518	2.16	1.69	2.06	1.86	2.43	2.45	2.64	2.01	1.55	1.73	0.78	1.47	1.3	1.28	1.12	1.42	1.43	1.59	1.72	1.45	1.16	1.37	1.01	0.94	1.79	2	1.57	1.47	1.56	1.82	1.84	1.3	2.36	2.43	2.45	2.39	1.82	1.8	1.97	1.92	1.79	2.14	1.84	1.65	2.16	1.94	2.11	1.81	1.74
ENSMMUG00000001519	0.08	0.04	0.14	0.02	0	0.04	0.1	0.07	0.08	0.03	0.07	0	0.01	0.03	0.02	0.01	0.14	0.11	0.09	0.01	0.01	0	0.09	0.04	0.16	0.09	0.27	0.08	0.01	0.03	0.13	0.07	0.08	0.04	0.07	0.01	0	0.01	0.01	0.01	0.01	0.04	0.07	0.03	0	0	0.02	0	0.03
ENSMMUG00000001520	0.02	0.05	0.07	0.01	0.01	0	0	0	0.03	0.02	0.04	0	0.04	0.07	0.01	0	0	0.04	0.08	0.01	0.02	0.01	0.02	0.01	0.01	0.01	0.1	0.07	0.02	0.06	0.01	0	0.09	0.01	0.03	0.04	0.03	0.04	0.01	0.04	0	0.02	0.01	0	0	0.01	0.03	0.01	0.01
ENSMMUG00000001521	0.05	0.02	0.07	0.03	0.06	0.04	0.03	0.07	0.06	0.09	0.08	0.1	0.08	0.13	0.09	0.11	0.07	0.1	0.05	0.04	0.01	0.13	0.1	0.18	0.05	0.03	0.05	0.01	0.03	0.04	0.01	0.03	2.6	1.61	2.01	3.42	1.98	0.83	2.25	0.68	0.18	0.2	0.08	0.06	0.21	0.22	0.06	0.2	0.28
ENSMMUG00000001522	0.06	0.11	0.27	0.25	0.07	0.12	0.2	0.1	0.18	0.27	0.48	0.45	0.36	0.76	0.73	0.5	0.13	0.29	0.29	0.56	0.05	0.36	0.12	0.36	0.08	0.09	0.12	0.02	0.05	0.13	0.14	0.05	3.57	3.63	1.47	5.75	4.41	2.8	6.7	5.55	0.19	0.52	0.02	0.38	0.66	0.48	0.08	0.79	0.9
ENSMMUG00000001524	0.95	1.12	1.3	1.24	1.14	0.78	1	1.08	1.08	1.15	1.24	1.3	1.2	0.96	1.17	0.99	0.72	0.79	1.09	1.38	0.76	0.93	1.02	0.84	1	1.2	1.21	0.97	1.01	1.08	1.06	1.27	4.52	5.14	5.41	5.56	5.12	3.9	4.46	4.43	4.94	5.38	6.48	5.09	4.48	3.62	4.85	4.02	3.99
ENSMMUG00000001526	2.53	2.52	2.75	1.92	2.09	2.15	1.68	2.19	2.8	2.53	2.15	2.05	1.83	1.88	1.87	2.12	1.77	1.27	2.02	1.76	1.75	1.53	1.72	1.7	1.72	1.75	2.01	1.83	1.71	1.59	2	1.62	4.8	4.61	4.6	4.83	4.38	4.28	4.01	4.67	3.95	4.85	4.33	4.16	3.3	4.22	4.58	4.36	3.43
ENSMMUG00000001527	12.1	11.39	15.87	10.52	11.01	10.51	8.71	10.99	17.54	13.15	17.42	18.81	16.4	13.13	14.72	17.23	10.83	6.82	12.45	13.21	7.75	8.29	7.62	8.92	11.69	11.24	12.91	9.85	11.8	14.45	10.82	11.18	11.27	11.17	10.67	9.97	9.83	9.55	7.15	12.2	15.28	16.17	15.49	15.86	13.23	11.39	10.4	10.8	18.01
ENSMMUG00000001529	5.86	5.74	6	5.04	4.74	4.22	4.1	5.01	6.49	4.88	6.47	6.58	6.86	6.97	7.53	7.14	5.97	4.68	5.45	6.84	5.1	5.22	6.49	6.26	6.18	4.97	6.9	5.95	5.61	6.43	5.34	6.34	14.73	15.03	13.84	15.13	15.63	14.31	14.31	16.43	12.48	12.76	11.45	12.6	11.77	12.6	13.2	12.29	11.4
ENSMMUG00000001530	4.82	5.29	5.09	6.6	6.81	6.61	4.36	5.98	3.69	4.23	3.42	3.35	2.97	2.85	2.5	3.52	2.65	3.4	3.8	3.8	3.52	3.15	2.2	3.32	3.71	3.7	3.37	3.94	3.67	3.7	4.15	3.75	10.6	11.58	11.59	10.01	8.64	8.9	8.78	9.36	9.85	12.82	9.27	9.61	10.46	8.93	9.56	10.65	9.36
ENSMMUG00000001531	10.69	10.93	8.48	10.25	7.96	7.99	8.01	10.1	8.66	6.38	8.26	9.63	9.52	8.49	9.26	9.58	7.77	7.56	7.71	10.23	8.87	9.45	10.6	9.32	9.26	9.12	9.72	11.94	10.16	13.75	13.49	12.4	18.93	17.97	15.19	21.15	18.87	20.59	19.69	20.41	13.28	11.47	10.93	13.73	12.1	12.82	14.36	13.32	11.35
ENSMMUG00000001532	0.65	0.78	1.01	0.76	0.55	0.77	0.61	0.95	0.71	0.5	0.67	0.58	0.69	1.21	0.81	1.02	0.62	0.48	0.65	0.77	0.63	1.18	0.75	0.93	0.98	0.85	1.25	1.45	1.08	1.71	1.12	1.96	2.49	2.82	2.92	2.6	2.55	3.35	3.01	3.2	2.1	2.22	2.05	2.41	1.99	2.58	3.03	2.85	1.76
ENSMMUG00000001533	2.57	3.17	2.87	2.83	2.68	2.76	3.48	3.46	2.83	3.09	4.27	2.97	2.81	3.61	3.88	3.3	3.46	3.23	3.08	3.28	3.95	3.17	5.6	3.02	2.21	2.16	2.62	2.68	3.41	3.12	4.26	3.24	1.29	2.88	1.95	2.01	1.98	2.71	3.34	2.15	2.96	2.29	2.45	2.67	2.44	3.22	4.08	3.92	3.16
ENSMMUG00000001534	0.49	0.39	0.51	0.81	0.67	0.62	0.55	0.86	0.45	0.45	0.47	0.56	0.46	0.56	0.37	0.33	0.35	0.42	0.64	0.49	0.53	0.46	0.57	0.55	0.45	0.5	0.77	1.09	0.75	1.11	0.68	0.96	0.85	0.92	0.81	1.64	1.41	1.54	1.04	1.68	0.72	0.75	0.94	1.57	1.01	0.88	1.12	1.51	0.76
ENSMMUG00000001535	0.39	0.32	0.43	0.35	0.41	0.59	0.33	0.35	0.4	0.41	0.31	0.47	0.34	0.52	0.46	0.59	0.3	0.46	0.37	0.33	0.21	0.17	0.24	0.2	0.27	0.3	0.25	0.34	0.14	0.35	0.35	0.31	8.15	7.86	7.28	8.76	9.21	10.64	5.99	11.42	1.55	2.01	1.71	1.51	1.84	2.03	1.59	2.03	1.56
ENSMMUG00000001536	0.72	0.77	0.83	1.02	0.71	0.8	0.78	0.76	0.53	0.48	0.53	0.73	0.62	0.58	0.65	0.64	0.51	0.5	0.64	0.61	0.46	0.76	0.54	0.63	0.67	0.72	0.68	0.68	0.61	0.75	0.72	0.87	1.96	1.89	2.34	2.12	1.75	1.72	1.72	1.84	1.26	1.46	1.62	1.28	1.57	1.33	1.53	1.89	1.07
ENSMMUG00000001537	8.39	7.19	6.31	5.79	2.77	4.82	5.31	5.77	16.94	13.5	14.47	15.57	8.66	15.77	14.17	14.6	13.47	12.81	8.91	18.07	7.31	13.17	11.51	11.11	8.1	7.85	6.2	6.55	4.2	7.5	7.49	8.3	3.8	4.01	2.72	4.6	2.35	3.5	3.49	2.76	16.99	12.96	9.97	13.32	8.22	16.84	13.78	11.8	13.2
ENSMMUG00000001538	11.66	11.73	10.14	10.85	8.9	10.1	8.93	10.47	11.04	10.39	11.18	11.05	12.39	12.91	11.2	11.23	10.63	9.41	10.74	11.5	10.94	12.12	15.34	10	9.25	9.39	10.89	10.83	12.55	15.32	11.09	11.81	18.36	20.19	18.23	21.94	20.87	26	21.82	21.11	17.22	14.55	13.49	15.49	14.12	16.48	13.34	15.6	14.84
ENSMMUG00000001539	1.94	2.15	2.08	2.17	2.41	2.4	1.99	2.29	1.61	1.88	2.37	2.59	2.56	2.63	3	2.96	1.55	1.35	2.06	2	1.45	1.8	2.51	2.02	1.92	1.57	1.86	1.66	1.46	1.98	1.98	1.58	13.18	15.05	11.3	14	14.14	14.28	14.26	13.53	8.12	8.58	7.64	8.47	8.89	8.96	8.43	8.57	4.72
ENSMMUG00000001540	2.47	1.99	3.08	1.63	1.65	1.81	1.47	2.19	3.07	3.77	4.1	3.63	3.46	4.01	3.09	3.89	1.61	1.92	3.18	4.37	2.88	2.05	3.78	2.3	1.87	1.97	2.08	2.58	2.14	1.85	2.39	1.51	2.45	2.32	2.74	2.89	2.55	2.26	2.27	1.91	3.86	3.52	2.73	3.52	4.27	4.43	5	4.69	8.83
ENSMMUG00000001543	3.66	4.08	2.99	3.24	2.44	2.49	2.8	2.95	3.56	2.71	4.72	4.6	5.65	5.54	5.56	5.57	3.59	3.95	4.21	4.52	4.99	5.42	7.3	5	2.7	3.85	3.46	3.57	4.82	4.64	4.35	4.76	10.98	11.82	7.05	9.69	12.94	11.65	10.04	8.62	8.51	7.74	8.24	8.28	13.28	9.26	10.87	9.91	6.65
ENSMMUG00000001544	0	0	0	0	0	0	0	0	0	0	0	0	0	0	0	0	0	0	0	0	0	0	0	0	0	0	0	0	0	0	0	0	2.91	2.94	2.72	2.84	3.09	2.94	2.42	2.38	5.23	5.35	5.41	4.97	5.21	3.87	5.16	3.87	6.18
ENSMMUG00000001547	10.66	9.93	13.29	12.3	11.97	12.18	10.97	13.33	17.15	14.1	21.28	20.97	16.58	18.14	18.55	18.83	18.27	15.59	18.56	20.25	17.77	19.51	18.59	18.13	12.95	13.9	13.62	11.36	15.07	12.35	13.21	16.11	9.99	10.36	10.56	10.8	10.79	10.17	9.88	12.47	17.63	17.34	20.27	18.43	18.78	17.93	18.35	21.23	15.23
ENSMMUG00000001548	5.47	6.44	7.59	6.08	5.18	5.19	4.26	6.14	5.09	3.69	4.94	5.89	4.04	3.48	4.15	4.62	4.01	3.52	4.53	4.87	3.54	3.12	3.61	3.68	3.64	4.16	4.88	4.8	4.68	5.39	4.7	5.05	9.41	9.95	8.58	8.65	9.89	7.72	7.98	8.27	7.03	7.35	8.58	7.79	10.07	6.65	8.37	8.33	6.17
ENSMMUG00000001549	7.38	7.24	5.58	6.33	5.94	5.99	4.88	5.66	8.06	7.49	8.65	8.63	8.79	9.86	8.26	8.63	6.09	4.96	6	7.76	7.02	7.19	10.17	7.76	5.65	6.05	6.01	6.09	6.66	7.99	6.87	6.11	9.85	11.02	10.43	14.88	13.34	16.51	15.63	13.93	11.83	10.47	12.47	11.68	11.16	12.24	11.39	12.26	9.53
ENSMMUG00000001550	0.57	0.7	0.61	0.45	0.73	0.6	0.74	0.66	0.92	0.73	0.86	0.79	0.95	1.27	1.15	1.02	0.58	0.55	0.84	0.74	1.03	1.04	1.15	0.69	0.65	0.83	0.82	0.64	0.89	1.44	0.57	0.61	7.24	8.24	8.1	10.3	8.87	11.2	10.82	10.02	5.5	5.96	8.15	7.06	6.81	6.21	7.51	7.8	3.84
ENSMMUG00000001551	57.81	57.4	71.65	65.97	58.84	51.57	48.11	54.33	63.92	53.06	87.04	81.23	86.72	90.95	93.33	80.57	56.29	48.07	62.5	71.7	75.5	67.52	85.89	73.71	48.19	47.91	58.07	53.16	60.72	59.98	57.64	63.39	65.39	67.41	69.94	80.16	94.5	93.08	88.8	86.5	75.38	62.85	80.28	84.91	88.01	76.51	89.08	81.5	77.36
ENSMMUG00000001552	0.01	0.03	0	0.01	0	0.01	0.01	0	0.01	0	0	0	0	0	0	0.01	0.01	0	0.01	0.01	0.05	0.01	0.01	0.02	0.02	0	0.02	0	0	0	0	0	0.01	0.03	0	0.01	0	0	0	0.01	0.01	0	0	0.03	0.01	0	0.04	0	0.02
ENSMMUG00000001553	12.16	12.63	10.4	9.21	7.86	9.81	6.98	8.8	9.23	9.48	10.62	8.54	9.97	13.76	10.1	10.81	8.47	10.04	7.81	8.87	9.08	12.9	9.62	8.67	7.71	9.1	8.71	8.99	8.4	12.98	7.89	10.83	18.35	19.48	15.83	20.59	18.2	21.86	17.93	19.11	11.97	13.91	13.57	12.5	11.08	15.65	10.94	14.06	10.34
ENSMMUG00000001554	0.02	0.01	0.01	0	0	0	0.01	0	0.04	0.02	0	0	0	0.02	0	0.02	0	0.03	0.02	0	0	0	0.01	0.02	0.02	0.08	0.01	0.01	0	0.03	0.03	0	0.01	0.03	0.07	0.01	0	0.01	0.04	0.02	0.05	0.08	0	0.03	0	0.04	0.01	0	0.03
ENSMMUG00000001555	0	0	0.04	0	0	0	0	0	0	0	0	0	0	0	0	0	0	0	0	0	0	0	0	0	0	0	0	0	0	0	0	0	0	0	0	0	0	0	0	0	0	0	0	0	0.08	0	0	0	0
ENSMMUG00000001556	0	0.11	0.03	0.12	0.12	0.06	0.15	0	0.08	0.12	0.17	0	0.34	0.46	0.04	0.05	0.06	0.06	0.09	0.17	0.2	0	0.03	0	0.04	0.12	0.1	0	0.09	0.23	0.25	0	0.08	0.27	0.28	0.35	0.59	0.58	0	0.28	0.06	0	0.03	0	0.15	0	0.22	0.04	0.25
ENSMMUG00000001557	0	0	0	0	0	0	0	0	0	0	0	0	0	0	0	0	0	0	0	0	0	0	0	0.01	0	0	0	0.01	0	0	0	0	0	0.03	0.01	0.01	0	0	0.01	0.01	0	0	0	0.02	0	0.02	0.01	0.02	0
ENSMMUG00000001558	8.68	9.92	11.43	8.94	4.75	4.13	8.56	7.13	7.8	5.66	7.74	8.39	9.19	10.3	8.26	6.35	8.89	7.55	9.07	8.83	7.84	9.33	11.64	9.14	14.41	13.49	22.95	21.79	20.31	29.96	17.02	25.38	4.3	3.61	4.64	5.48	5.47	5.35	6.5	6.28	7.97	6.19	10.33	11.84	10.81	10.85	11.96	11.3	10.52
ENSMMUG00000001559	2.24	2.5	2.29	1.87	1.43	1.8	1.98	2.15	1.61	1.13	1.92	1.78	1.38	1.62	1.76	1.91	1.87	1.31	2.33	1.84	1.95	2	1.59	1.83	2.29	2.02	2.36	2.12	1.61	2.21	2.31	2.8	13.74	11.16	10.83	10.47	10.81	10.94	10.97	10.79	5.68	4.75	6.28	4.97	6.34	4.86	5.5	5.57	5.99
ENSMMUG00000001560	2.17	2.03	2.53	2.09	2.1	1.91	1.61	2.28	1.86	1.23	1.52	1.44	1.61	1.37	1.62	1.37	2.18	1.57	2.02	1.85	2.06	1.33	1.55	2.25	1.33	1.4	1.54	1.75	1.65	1.15	1.5	1.18	4.36	4.23	4.3	4.25	5.01	4.47	4.26	4.78	2.94	2.93	3.31	2.85	3.35	3.34	3.44	3.31	2.61
ENSMMUG00000001561	174.15	189.43	172.76	143.99	146.56	128.69	163.59	160.29	174.63	160.26	167.35	146.05	136.44	132.89	156.64	147.36	153.66	133.44	133.53	140.07	137.31	118.67	143.41	135.93	125.74	134.75	177.36	127.6	143.62	151.44	160.4	175.57	124.38	131.33	136.1	136.47	123.21	125.01	120.91	163.31	112.09	140.21	128.72	134.64	124.44	137.26	170.31	154.49	142.94
ENSMMUG00000001562	7.12	7.71	8.51	7.92	9.09	9.44	7.3	7.84	5.42	5.5	4.67	5.37	4.36	4.54	5.92	4.92	3.94	4.48	5.06	5.14	4.25	4.06	3.75	4.22	4.94	4.23	4.77	5.3	4.48	4.77	6.27	4.24	19.24	18.88	18.78	18.61	16.58	15.57	18.11	17.64	11.57	13.52	11.36	10.97	11.33	11.52	13.38	10.58	10.33
ENSMMUG00000001563	0.68	0.63	0.42	0.49	0.38	0.42	0.45	0.5	0.35	0.2	0.4	0.44	0.55	0.52	0.46	0.49	0.31	0.51	0.34	0.3	0.33	0.31	0.39	0.22	0.35	0.31	0.52	0.77	0.49	1.24	0.89	0.98	3.48	3.89	5.49	5.22	6.23	7.92	4.91	5.3	3.24	2.82	3.45	2.9	3.21	3.16	2.45	3.12	3.78
ENSMMUG00000001564	1.73	2.06	1.89	2.21	1.77	1.66	1.4	1.93	1.22	0.97	1.42	1.28	1.71	1.71	1.9	1.7	0.75	1.12	1.84	1.62	1.38	1.25	1.44	1.34	1.24	1.52	1.68	1.52	1.36	1.89	1.69	2.17	4.09	4.5	4.76	4.07	6.15	6.96	6.44	5.59	2.62	2.78	3.8	3.4	3.94	4.07	3.94	3.6	2.91
ENSMMUG00000001565	3.23	3.02	3.72	3.61	3.89	3.61	4.38	4.14	4.5	3.96	4.07	5.47	4.88	5.29	5.75	4.76	3.81	2.55	4.33	4.81	4.5	4.12	4.66	4.05	2.6	2.91	3.47	3.11	3.27	3.15	3.81	3.67	47.98	45.04	41.91	46.53	39.87	34.89	38.93	35.24	24.42	24.73	19.53	19.87	21.43	23.14	20.73	20.85	15.89
ENSMMUG00000001568	0	0	0	0	0	0	0	0	0	0	0	0	0	0	0	0	0	0	0	0	0	0	0	0	0	0	0	0	0	0	0	0	7.99	7.8	4.78	8.24	7.03	9.13	6.01	7.3	6.56	4.06	3.52	5.01	4.73	3.22	3.43	3.92	1.8
ENSMMUG00000001569	1.41	0.79	0.66	0.44	0.75	0.26	0.51	0.84	0.26	0.74	0.28	0.36	0.26	0.14	0.49	0.81	0.41	0.7	0.26	0.5	0.53	0.4	0.66	0.53	1.02	0.94	0.73	0.98	0.35	0.6	0.63	0.94	0.61	0.48	0.41	0.5	0.66	0.85	0.48	1.01	0.45	1.07	0.58	0.6	0.7	0.86	0.74	1.08	0.99
ENSMMUG00000001570	4.81	7.23	5.68	5.09	5.07	5.59	5.8	5.53	4.01	4.4	3.12	4.09	4.29	4.47	4.12	3.2	3.51	4.71	6.19	5.81	4.38	4.11	3.29	4.06	5.43	5.72	8.06	6.83	5.08	7.01	5.79	7.42	12.2	13.77	13.01	17.45	13.15	12.53	14.45	14.3	5.33	9.51	8.67	9.96	6.91	7.54	12.02	7.87	5.65
ENSMMUG00000001571	38.64	39.29	52.3	36.7	32.39	34.36	32.57	40.94	34.19	32.87	43.17	42	38.39	40.57	45.19	41.42	27.5	23.84	47.08	42.71	38.4	38.87	39.4	43.7	28.23	26.44	44.85	30.4	31.86	34.37	32.66	36.13	36.41	33.48	70.65	41.29	41.34	45.34	39.87	43.24	23.36	29.31	47.75	39.09	31.21	31.3	41.76	36.57	31.84
ENSMMUG00000001572	14.71	17.19	13.75	11.09	10.01	11.25	9.74	9.5	13.24	9.41	15.43	12.31	10.72	11.67	13.65	10.75	11.41	13.64	11.99	11.45	13.3	10.12	14.17	10.09	12.38	13.11	14.53	11.93	11.82	14.94	12.58	12.06	16.78	16.4	12.64	14.91	14.43	13.56	13.36	15.56	18.96	19.52	19.4	15.89	17.41	15.95	18.69	17.11	13.83
ENSMMUG00000001573	25.39	23.84	24.25	23.78	14.83	15.95	12.77	17.75	20.15	15.43	21.72	23.09	23.33	26.96	22.84	23.93	20.37	18.07	21.96	25.98	24.22	26.73	25.03	24.33	19.2	19.73	24.67	25.2	22.44	28.38	16.88	23	39.52	38.67	28	38.33	35.7	39.41	33.29	35.02	29.94	30.33	28.36	32.7	30.23	32.69	26.92	28.8	22.22
ENSMMUG00000001575	2.94	2.89	2.26	2.73	4.73	3.66	2.87	3.74	1.98	2.42	1.5	1.92	2.14	1.72	1.92	2.12	1.73	1.37	1.84	1.78	2.07	1.88	1.41	2.23	2.18	2.16	2.32	2.13	2.26	1.96	2.84	2.08	2.32	2.09	2.07	2.27	2.26	1.71	1.96	2.5	3.53	3.97	3.3	3.84	3.93	4.1	3.76	4.42	3.67
ENSMMUG00000001577	0.01	0.01	0	0	0.06	0.04	0.01	0.03	0.01	0	0	0.02	0.01	0.01	0.01	0.01	0	0.01	0	0	0.01	0	0	0	0.03	0.04	0.06	0.02	0.13	0	0.02	0.04	1.75	1.51	1.94	1.78	1.61	3.4	2.09	1.91	0.02	0	0	0.01	0	0	0.01	0	0.02
ENSMMUG00000001579	0.41	0.8	0.51	0.38	0.16	0.16	0.17	0.09	0.5	0.45	0.25	0.52	0.23	0.19	0.27	0.13	0.34	0.53	0.48	0.31	0.3	0.07	0.13	0.07	0.27	0.46	0.18	0.37	0.25	0.16	0.27	0.08	0.67	0.93	0.74	0.89	0.31	0.2	0.24	0.28	0.64	0.96	0.56	0.57	0.18	0.31	0.27	0.27	0.53
ENSMMUG00000001580	0.8	0.8	0.66	0.94	0.44	0.67	0.67	0.56	1.17	0.76	1.05	0.9	0.79	0.72	0.87	0.94	0.97	0.6	0.96	0.85	0.63	0.79	0.61	0.85	0.82	0.61	0.54	0.77	0.61	0.43	0.63	0.55	13.78	13.84	20.09	14.67	17.68	24.19	9.83	27.45	13.71	16.39	12.32	8.18	8.08	11.68	4.64	8.07	8.29
ENSMMUG00000001582	104.26	102.58	95.01	89.91	64.51	67.71	65.75	68.35	86.7	57.98	101.48	85.33	93.8	83.74	93.13	83.75	79.02	85.52	93.24	103.96	106.15	93.83	98.1	87.26	68.86	65.36	88.84	66.89	74.34	80.28	70.05	70.15	106.23	96.68	94.14	89.87	96.22	92.74	83.36	91.67	70.22	72.82	87.23	74.56	84.91	73.51	75.76	74.06	76.98
ENSMMUG00000001583	0.14	0.14	0.21	0.17	0.15	0.16	0.08	0.15	0.24	0.32	0.19	0.21	0.37	0.26	0.39	0.26	0.23	0.24	0.25	0.07	0.06	0.19	0.25	0.08	0.28	0.5	0.29	0.32	0.15	0.3	0.32	0.19	0.46	0.85	0.25	0.86	0.4	0.47	0.19	0.18	0.45	0.52	0.34	0.63	0.72	0.37	0.38	0.31	0.52
ENSMMUG00000001585	1.32	1.21	1.32	1	0.83	0.98	0.95	0.97	1.23	0.95	0.98	1.33	1.24	1	1.06	1.05	1.09	0.77	0.96	0.85	0.85	1.15	0.94	1.09	1.16	0.95	1.1	1.19	1.13	1.18	0.87	1.12	4.32	4.22	4.03	5.05	3.7	5.29	4.35	4.47	1.75	1.65	1.63	1.78	1.66	2.07	1.79	1.84	2.16
ENSMMUG00000001586	7.32	6.54	8.55	7.61	7.13	7.01	6.43	7.18	7.99	7.74	9.58	9.35	10.89	11.93	11.4	10.6	7.46	7.02	7.92	9.12	10.93	9.67	13.62	10.93	7.29	6.94	6.97	6.99	7.72	6.75	6.86	7.36	10.53	10.14	9.15	11.66	12.16	15.06	13.57	11.34	11.65	10.65	10.73	11.98	12.16	11.19	12.16	12.63	10.98
ENSMMUG00000001587	36.36	33.3	46.34	46.86	52.39	51.4	34.38	43.29	41.34	38.04	40.47	34.93	32.67	28.2	36.02	34.33	24.77	23.22	30.98	34.17	28.77	22.32	25.99	23.49	20.2	20.8	26.11	24.51	24.34	23.56	27.96	25.77	28.89	28.53	28.69	26.37	36.9	30.49	27.12	33.51	37.57	40.66	43.27	37.89	37.3	34.17	41.62	36.57	49.52
ENSMMUG00000001588	0.06	0.06	0.08	0.11	0.08	0.01	0.03	0.02	0.3	0.1	0.07	0.09	0.21	0.06	0.08	0.12	0.12	0.15	0.19	0.05	0.19	0.21	0.05	0.17	0.11	0.14	1.52	1.13	0.86	0.25	0.34	0.02	1	0.84	0.76	0.62	0.35	0.24	0.26	0.31	0.23	0.05	0.1	0.05	0.24	0.09	0.06	0.04	0.12
ENSMMUG00000001589	0.01	0.02	0.01	0.02	0.01	0.07	0.01	0.01	0.05	0.03	0.01	0.03	0	0.01	0	0	0.03	0	0.01	0.09	0.01	0	0.01	0.02	0.03	0	0	0.02	0	0.03	0	0	0	0.03	0.01	0.06	0.14	0.02	0.08	0.03	0.05	0.08	0.17	0.11	0.12	0.08	0.11	0.1	0.16
ENSMMUG00000001591	0	0	0	0	0	0	0	0	0	0	0	0	0	0	0	0	0	0	0	0	0	0	0	0	0	0	0	0	0	0	0	0	0.05	0.04	0	0.03	0.12	0.04	0.02	0.02	0	0	0.07	0.07	0.02	0	0.01	0	0
ENSMMUG00000001592	15.33	14.67	14.05	15.26	11.07	12.6	10.74	11.85	12.21	8.73	11.18	13.66	16.07	13.43	13.62	14.16	13.77	14.24	14.38	16.38	18.8	18.19	21.38	21.57	12.88	12.99	17.24	16.57	17.09	20.32	15.42	18.43	30.26	30.76	27.53	35.66	37.16	40.67	35.25	34.42	20.06	19.97	19.43	20.92	19.72	18.54	18.49	20.2	17.12
ENSMMUG00000001593	0.1	0.02	0.18	0.15	0.1	0.09	0.07	0.04	0.1	0.03	0.08	0.1	0.1	0.01	0.06	0.07	0.15	0.02	0.1	0.12	0.14	0.06	0.09	0.11	0.21	0.06	0.03	0.07	0.23	0.07	0.06	0.03	0.19	0.32	0.2	0.32	0.22	0.21	0.22	0.29	0.27	0.4	0.35	0.4	0.32	0.2	0.32	0.31	0.18
ENSMMUG00000001594	3.38	3.2	5.04	3.79	3.73	3.36	2.42	3.18	3.82	2.75	4.73	3.17	3.85	3.31	3.85	3.18	2.44	1.89	3.57	2.79	3.1	3.01	3.3	3.29	2.85	2.32	4.1	2.32	3.31	2.75	2.83	3.07	5.07	5.45	4.07	4.55	5.76	4.69	4.53	4.18	3.72	3.8	4.76	3.81	4.32	3.47	4.5	3.99	4
ENSMMUG00000001595	2.55	2.13	2.91	2.29	1.6	1.9	1.16	1.79	4.14	3.35	3.15	3.85	2.92	3.73	2.62	3.8	5.11	3	3.1	3.39	2.93	3.56	4.56	2.59	3.62	3.68	2.55	2.73	2.43	3.26	2.15	2.39	5.47	5.94	4.43	5.25	5.23	3.89	4	3.94	7.98	6.37	7.02	6.56	4.93	4.82	5.91	4.94	7.7
ENSMMUG00000001596	7.2	6.31	8.01	7.64	6.7	6.79	4.9	6.65	7.26	5	6.09	7.66	7.83	6.55	7.29	6.02	4.56	3.4	5.28	6.74	5.03	4.61	6.63	4.65	6.35	5.33	6.93	6.84	6.5	7.59	5.95	7.81	9.95	9.02	8.25	9.72	8.83	10.21	8.12	10.09	8.81	9.13	8.8	10.76	9.36	8.06	9.71	9.34	9.54
ENSMMUG00000001597	0	0.05	0	0.05	0.01	0.02	0.01	0.02	0.09	0	0.02	0.06	0.05	0	0	0	0.05	0.11	0	0.01	0	0.13	0	0.01	0.05	0	0.09	0	0.03	0	0	0.09	0.19	0.17	0.14	0.19	0.09	0.13	0.03	0.18	0.16	0.02	0.02	0.08	0.06	0.02	0.05	0.13	0.07
ENSMMUG00000001600	0.01	0.03	0.03	0.01	0	0.01	0	0.01	0.03	0	0.01	0.02	0.02	0	0.04	0	0.02	0.02	0.01	0.04	0	0.02	0	0	0.01	0.01	0.03	0	0	0.01	0	0.02	0.21	0.33	0.3	0.29	0.18	0.2	0.28	0.17	0.17	0.12	0.18	0.26	0.17	0.25	0.16	0.22	0.18
ENSMMUG00000001601	0	0	0	0	0	0	0	0	0	0	0	0	0	0	0	0.1	0	0	0	0	0	0	0	0	0	0	0	0	0	0	0	0	0	0.08	0	0.09	0	0.19	0	0	0	0	0	0	0	0	0.23	0	0.08
ENSMMUG00000001604	0	0	0	0	0	0	0	0	0	0	0	0	0	0	0	0	0	0	0	0	0	0	0	0	0	0	0	0	0	0	0	0	0.37	0.65	0.44	0.35	0.44	0.19	0.34	0.53	0.27	0.49	0.43	0.24	0.43	0.34	0.33	0.59	0.51
ENSMMUG00000001607	0.5	0.8	0.36	0.33	0.27	0.33	0.41	0.31	0.77	0.44	0.44	0.74	0.67	0.67	0.89	0.63	0.26	0.25	0.32	0.3	0.21	0.25	0.36	0.28	0.33	0.45	0.33	0.31	0.29	0.24	0.42	0.36	1.01	1.27	0.9	0.85	0.75	0.87	0.81	1.08	0.64	0.48	0.51	0.56	0.53	0.56	0.58	0.46	0.43
ENSMMUG00000001608	2.38	2.97	2.17	2.32	2.19	1.93	2.01	2.26	1.88	1.97	2.18	2.21	2.41	1.92	2.37	3.18	1.8	1.79	2.58	2.38	2.78	2.01	2.09	2.43	1.91	2.25	2.32	2.1	2.08	2.01	2.52	2.17	1.73	1.67	1.78	1.29	1.53	0.99	1.13	1.39	3.03	3.59	3.71	3.37	3.94	3.3	3.96	4.41	3.12
ENSMMUG00000001609	0.75	0.71	0.83	0.56	0.31	0.37	0.42	0.44	0.37	0.34	0.54	0.4	0.59	0.44	0.65	0.62	0.47	0.34	0.79	0.53	0.52	0.65	0.4	0.37	0.61	0.51	0.61	0.59	0.45	0.44	0.37	0.5	0.88	0.75	1.12	0.65	0.84	0.48	0.72	0.84	0.85	1.06	1.58	0.74	0.93	2.06	1.07	0.85	0.91
ENSMMUG00000001610	13.94	12.53	12.49	12.03	11.56	12.2	11.22	14.14	13.79	13.84	18.88	17.53	21.24	22.96	20.93	19.13	12.25	11.6	14.48	15.26	16.44	17.76	23.6	15.51	11.09	10.17	12.02	13.72	16.71	17.17	15.28	14.13	24.8	25.75	24.24	29.71	31.96	39.13	33.06	29.44	21.06	18.55	21.21	23.15	23.07	24.65	20.98	26.06	19.72
ENSMMUG00000001611	0.77	0.85	0.77	0.72	0.81	0.78	0.79	0.88	0.54	0.54	0.35	0.66	0.49	0.45	0.55	0.58	0.46	0.35	0.58	0.43	0.4	0.59	0.41	0.41	0.86	0.78	0.89	0.89	0.55	0.83	0.89	0.79	5.33	5.8	6.07	5.91	4.84	4.93	5.98	4.95	3.45	4.6	4.5	4.55	4.07	5.11	4.91	4.49	2.74
ENSMMUG00000001612	10.76	10.23	11.02	9.81	10.89	11.9	12.89	9.54	9.61	7.56	12	13.32	13.56	17.1	20.99	15.44	10.13	11.11	11.79	13.73	15.7	16.26	24.47	13.56	7.44	9.51	8.1	10.92	13.76	12.68	16.2	10.45	39.03	36.23	36.73	38.28	38.65	45.54	38.18	37.93	27.94	26.37	25.14	26.57	29.17	33.61	30.63	29.76	21.29
ENSMMUG00000001613	56.36	49.43	53.9	48.42	37.61	36.54	41.49	43.76	55.31	39.86	49.59	49.32	45.52	47.93	55.12	48.94	58.41	47.54	41.08	52.76	44.44	42.98	60.85	48.5	44.09	43.18	48.3	44.88	45.14	45.28	48.98	47.58	47.77	47.43	43.17	50.25	51.88	53.67	52.62	51.93	54.72	46.79	43.97	48.79	45.94	43.22	52.23	43.36	66.53
ENSMMUG00000001614	20.25	18.75	20.14	18.07	14.1	11.45	11.9	14.57	20.75	16.2	24.61	22.09	22.46	22.61	22.48	20.2	19.42	16.28	18.71	20.83	17.79	19.23	18.45	19.32	18.95	17.18	20.91	17.56	20.98	20.15	18.9	18.64	47.49	42.08	40.32	42.17	49.59	50.81	48.19	45.84	36.6	35.86	41.23	41.44	38.18	39.37	36.6	35.94	29.72
ENSMMUG00000001616	15.93	19.36	19.26	18.01	15.06	17.93	19.97	20.7	14.46	12.38	18.83	15.36	18.28	18.79	18.77	19.67	17.56	18.56	22	18.13	25.3	23.27	29.25	26.88	21.33	20.92	35.03	25.57	28.29	34.71	27.42	33.66	8.36	7.35	10.1	9.13	10.72	12.36	10.82	11.68	22.11	21.55	24.69	24.14	26.99	23.01	28.18	27.24	17.54
ENSMMUG00000001617	0.03	0.01	0.01	0	0.02	0	0.08	0	0	0.01	0.01	0.03	0.05	0.02	0	0.01	0	0	0	0	0.05	0	0.02	0	0.02	0.05	0.01	0.14	0.01	0	0	0	4.26	2.59	0.74	1.52	0.34	0.34	0.35	0.46	0.07	0.05	0.05	0.03	0.02	0.03	0.01	0.16	0.07
ENSMMUG00000001618	0.01	0.02	0	0	0.02	0	0	0	0.09	0	0	0	0.01	0.03	0	0	0.02	0.01	0.07	0.01	0.06	0.04	0	0.02	0.05	0.06	0.03	0.04	0.05	0	0	0	0.11	0.39	0.28	0.07	0.2	0.07	0.11	0.12	0.03	0.04	0.1	0.03	0.03	0.02	0.02	0.01	0.03
ENSMMUG00000001619	4.56	4.29	5.17	3.68	3.36	2.88	3.62	4.08	4.26	3.4	3.77	3.22	3.04	3.15	3.61	3.46	3.79	3.04	4.09	3.35	3.26	3.35	2.79	3.34	4.25	4.34	5.25	3.93	3.51	3.84	4.09	4.65	4.75	4.18	4.9	3.69	4.26	3.15	4.31	4.93	3.56	4.1	5.68	4.41	3.93	3.8	5.35	4.16	3.74
ENSMMUG00000001620	0.29	0.29	0.43	0.11	0.31	0.14	0.06	0.18	0.02	0	0.32	0	0.01	0.01	0.03	0.01	0.07	0.03	0.43	0	0	0.01	0.01	0	0.02	0.02	0.31	0.04	0.09	0.03	0	0.12	0.03	0.03	0.32	0.03	0.01	0.02	0.04	0.06	0.04	0.05	0.2	0.03	0.01	0.07	0.03	0.01	0
ENSMMUG00000001621	0	0.03	0	0	0.03	0.02	0.02	0	0.03	0.02	0.02	0.05	0.02	0	0.04	0	0	0	0.02	0.06	0	0.01	0.03	0.02	0.03	0.04	0	0	0.01	0	0.02	0	0.09	0.07	0.05	0.07	0.02	0.03	0.08	0.05	0	0	0.03	0.04	0	0.03	0.05	0	0.01
ENSMMUG00000001622	0.02	0.06	0.02	0.06	0.04	0.03	0.08	0.05	0	0	0.02	0.02	0.03	0	0.03	0.01	0.01	0.01	0	0	0	0	0.07	0.01	0.1	0	0.05	0.03	0.03	0.02	0	0	0	0	0	0.05	0.02	0.02	0	0.02	0.06	0	0.02	0.01	0.03	0	0	0.05	0
ENSMMUG00000001623	4.53	4.1	3.9	4.92	3.99	3.37	3.34	4.11	5.19	4.31	4.46	4.85	4.33	5.72	5.73	4.87	4.04	3.47	3.64	4.63	4.22	3.71	4	2.93	3.27	3.28	2.3	3.08	3.73	4.24	3.43	3.29	3.95	4.59	4.54	5.03	4.03	6.35	6.05	4.84	3.54	3.05	2.61	2.75	2.9	2.81	3.21	3.28	4.53
ENSMMUG00000001624	0	0	0	0	0.01	0.02	0	0.03	0	0	0	0	0	0.02	0	0	0	0	0	0	0.01	0	0	0	0	0	0.02	0	0	0	0	0	0	0	0	0	0	0	0	0.02	0	0	0	0	0	0	0.01	0	0
ENSMMUG00000001625	0.41	0.47	0.68	0.2	0.25	0.22	0.65	0.41	0.57	0.75	0.71	0.91	0.53	0.78	0.72	0.54	0.47	0.59	0.46	0.4	0.44	0.48	0.75	0.53	0.55	0.78	0.49	0.24	0.44	0.65	1.05	0.79	15.87	15.34	4.31	9.48	3.32	2.51	3.66	2.04	2.68	4.58	3.5	4.51	2.52	2.92	6.69	3.92	7.11
ENSMMUG00000001628	0	0	0	0	0	0	0	0	0	0	0	0	0	0	0	0	0	0	0	0	0	0	0	0	0	0	0	0	0	0	0	0	1.67	2.13	2.38	1.61	1.48	1.33	1.44	1.59	1.12	2.25	1.65	1.37	0.89	1.25	2.08	1.5	1.1
ENSMMUG00000001629	0	0	0	0	0	0	0	0	0	0	0	0	0	0	0	0	0	0	0	0	0	0	0	0	0	0	0	0	0	0	0	0	0.16	0.22	0.36	0.07	0	0.36	0.08	0.22	0.09	0	0	0.08	0.05	0.45	0	0.11	0
ENSMMUG00000001630	0.87	1.09	0.69	0.81	0.77	1.34	1.37	0.91	1.17	0.93	1.27	1.13	0.8	0.95	0.98	1.19	0.88	0.61	0.8	1.46	0.89	0.85	0.52	0.66	0.78	1.59	2.17	1.09	1.22	1.05	1.14	1.27	0.53	0.37	0.29	0.49	0.36	0.23	0.27	0.42	0.82	0.8	0.83	0.69	0.65	0.55	0.69	0.82	1.14
ENSMMUG00000001631	0.1	0.04	0.12	0.12	0.16	0.13	0.11	0.02	0.18	0.12	0.11	0.05	0.13	0.26	0.1	0.11	0.06	0.02	0.13	0.1	0.1	0.18	0.08	0.02	0.05	0.23	0.11	0.07	0	0.29	0.07	0.25	9.73	8.89	7.72	8.8	6.07	6.3	7.46	7.41	1.08	1.14	0.87	0.82	1.44	0.94	1.14	1.33	1.28
ENSMMUG00000001632	20.88	20.6	23.06	20.84	13.48	16.75	13.12	16.79	23.02	15.79	22.53	21.04	21.01	20.91	18.38	19.2	20.29	16.59	15.23	25.24	21.08	20.21	21.22	18.29	20.36	22.26	21.36	26.97	25.52	28.78	24.89	28.04	81.95	87.98	77.91	89.85	83.04	78.66	67.39	71.4	58.14	65.33	58.28	59.78	55.23	56.17	48.51	48.39	52.18
ENSMMUG00000001633	0	0	0	0	0	0	0	0	0	0	0	0	0	0	0	0	0	0	0	0	0	0	0	0	0	0	0	0	0	0	0	0	0.44	0.4	0.89	0.63	0.67	0.66	0.48	0.59	0.92	0.39	0.48	0.54	0.67	0.79	0.59	0.51	0.64
ENSMMUG00000001634	3.55	5.42	4.17	4.8	4.8	5.07	4.33	5.51	4.55	4.33	6.96	6.37	6.33	6.88	7.99	6.8	3.54	4.08	4.87	6.34	3.91	5.12	6.48	5.08	3.13	4.19	3.08	2.87	2.9	3.42	4.43	3.17	21.88	22.77	23.03	23.86	19.82	19.47	21.5	19.34	72.86	71.3	57.31	50.16	51.69	55.94	49.15	46.56	34.23
ENSMMUG00000001635	0.62	0.58	0.68	0.4	0.33	0.31	0.49	0.46	1.02	0.96	0.99	0.94	1.03	1.25	1.3	1.31	0.81	0.76	1.2	0.91	1.04	1.33	1.56	1.06	0.74	0.58	0.58	0.72	0.75	0.92	0.6	0.81	4.43	3.86	2.57	2.88	3.73	3.91	3.62	3.24	1.01	0.8	1.12	0.97	0.99	1.24	0.86	1.13	1.42
ENSMMUG00000001638	34.52	42.71	48.42	36.54	35.39	30.82	30.85	36.5	24.2	22.69	28.69	24.73	25.55	21.28	27.89	22.03	24.9	27.75	29.67	30.66	28.84	20.67	28.07	25.78	24.48	27.49	32.68	27.82	28.65	25.4	27.55	28.39	30.32	28.42	25.11	25.63	25.11	20.73	22.76	26.2	36.76	47.89	42.81	37.14	35.4	28.98	41.45	33.31	34.5
ENSMMUG00000001639	0	0	0	0	0	0	0	0	0	0	0	0	0	0	0	0	0	0	0	0	0	0	0	0	0	0	0	0	0	0	0	0	0.05	0.07	0.1	0.07	0.16	0.14	0.13	0.11	0.19	0.2	0.27	0.21	0.1	0.11	0.14	0.1	0.23
ENSMMUG00000001640	0.11	0.06	0.23	0.1	0.1	0.15	0.12	0.09	0.04	0.08	0.2	0.15	0.16	0.11	0.11	0.13	0.12	0.06	0.21	0.12	0.07	0.1	0.09	0.03	0.07	0.14	0.14	0.06	0.01	0.15	0.15	0.1	0.32	0.23	0.67	0.2	0.33	0.27	0.44	0.48	0.54	0.18	0.84	0.33	0.63	0.59	0.29	0.52	0.11
ENSMMUG00000001641	0	0	0	0	0	0	0	0	0	0	0	0	0	0	0	0	0	0	0	0	0	0	0	0	0	0	0	0	0	0	0	0	0.28	0.41	0.42	0.32	0.73	0.46	0.49	0.67	0.56	0.43	0.43	0.5	1.21	0.47	0.53	0.47	0.28
ENSMMUG00000001642	15.31	16.65	21.01	17.33	17.06	17.43	16.8	18.15	12.53	15.05	15.88	16.26	14.86	16.41	17.36	15.74	14.45	12.96	16.71	16.17	16.11	16.7	15.33	15.2	14.08	14.3	16.05	14.25	14.68	16.18	14.47	14.55	40.84	42.58	46.77	43.76	42.41	42.13	43.38	42.44	39.5	43.91	41.99	35.94	37.93	37.55	40.86	36.89	33.2
ENSMMUG00000001644	0.56	0.92	1.08	1.49	1.8	1.5	0.9	1.52	1.44	1.37	1.36	1.46	1.36	1.37	1.17	1.28	0.99	1.04	1.48	1.65	0.88	0.95	1.36	1.65	1.28	1.04	0.8	0.87	1.16	0.76	0.99	0.83	5.99	6.21	5.75	5.94	5.48	6.74	4.95	6.96	5.29	7.23	5.79	5.43	5.73	6.72	4.65	5.79	3.29
ENSMMUG00000001645	0	0	0	0	0	0	0	0	0	0	0	0	0	0	0	0	0	0	0	0	0	0	0	0	0	0	0	0	0	0	0	0	31.26	30.03	26.81	33.16	40.74	43.22	40.82	39.35	18.65	17.64	18.91	18.93	24.11	19.38	21.97	20.44	15.59
ENSMMUG00000001646	9.13	8.02	9.28	7.28	7.15	7.97	7.7	7.47	9.5	7.57	9.74	8.75	7.12	8.65	11.3	8.95	5.76	5.89	6.7	6.77	4.59	6.22	6.93	5.22	6.48	7.15	6.85	6.33	6.43	8.13	8.91	7.26	11.98	12.98	11.91	11.29	12.22	12.59	12.5	12.04	10.31	10.09	10.32	10.45	8.46	8.38	9.58	9.08	10.17
ENSMMUG00000001647	0.02	0	0.05	0	0	0	0	0.02	0.05	0.02	0	0.03	0	0	0.02	0.05	0	0.06	0.02	0	0	0	0	0	0	0.02	0.03	0	0.03	0.12	0	0	0.03	0.06	0.02	0	0.09	0.05	0	0	0	0.02	0	0	0	0	0	0.04	0
ENSMMUG00000001648	0.86	1.02	1.21	1.06	0.58	0.76	1	0.79	0.49	0.56	1.06	0.72	0.42	0.62	0.45	0.32	0.45	0.59	0.87	1.12	0.58	0.42	0.34	0.62	0.55	0.68	0.8	0.7	0.63	0.87	1.19	1.05	0.74	0.6	0.69	0.52	0.56	0.78	0.45	0.86	0.39	0.41	1.01	0.77	0.53	0.73	0.66	0.72	0.84
ENSMMUG00000001649	0.04	0.03	0.08	0.03	0.02	0.04	0.06	0.06	0.05	0.05	0.09	0.05	0.06	0.06	0.07	0.03	0.07	0.04	0.07	0.05	0.11	0.07	0.01	0.01	0.04	0.05	0.14	0.08	0.04	0.07	0.05	0.08	0.73	0.72	0.69	0.88	0.82	0.84	1.09	1.09	0.56	0.41	0.46	0.24	0.35	0.43	0.34	0.3	0.5
ENSMMUG00000001651	0	0	0	0.01	0	0	0.01	0.01	0	0	0	0	0	0	0.01	0	0	0.01	0	0	0	0	0	0	0	0	0	0	0	0	0	0	0.06	0.07	0.01	0	0.03	0.01	0	0.01	0.01	0	0	0.01	0.02	0.01	0	0	0
ENSMMUG00000001652	0.35	0.6	0.05	0.03	0.01	0.06	0.01	0.03	0.05	0.02	0.01	0.12	0.02	0.03	0.03	0	0.04	0.06	0	0.01	0.02	0.01	0.06	0	0.09	0.05	0.01	0.03	0.02	0.07	0.03	0.12	0.21	0.65	0.06	0.12	0.08	0.09	0.09	0.01	0.34	0.22	0.06	0.08	0.1	0.08	0.06	0.08	0.05
ENSMMUG00000001653	7.18	7.88	9.2	8.19	6.57	6.58	5.38	6.82	8.47	8.06	6.46	8.19	6.45	7.66	7.58	8.86	5.92	6.18	5.87	8.74	6.61	5.55	5.26	7.11	5.59	7.49	7.27	8.26	8.01	6.16	6.83	8.08	16.52	15.29	20.51	17.87	13.88	14.18	13.69	16.22	10.31	13.3	13.53	13.76	12.11	11.58	14.34	12.85	11.88
ENSMMUG00000001654	0	0	0.01	0.01	0.01	0.02	0	0.01	0.01	0.02	0.04	0.03	0.04	0.05	0.1	0.09	0.01	0.01	0.03	0.02	0.03	0.03	0.04	0.01	0	0.01	0	0	0.02	0	0.02	0.02	0.04	0	0.04	0.05	0.05	0.05	0.03	0.05	0	0.01	0.01	0	0	0.01	0.02	0	0
ENSMMUG00000001655	57.16	63.98	56.84	64.07	59.86	57.18	58.4	70.74	48.05	74.27	50.86	52.45	56.62	60.53	46.66	55.26	68.68	67.75	81.43	69.66	87.31	71.44	58.49	70.48	46.16	48.05	60.26	63.23	75.56	80.39	53.87	57.48	52.82	49.97	71.44	49.93	52.89	45.29	81.2	52.14	25.23	25.64	29.92	28.82	37.59	30.44	17.2	27.72	52.23
ENSMMUG00000001656	0.09	0.05	0.02	0.09	0.02	0.03	0.08	0.22	0.09	0.08	0.06	0.04	0.07	0.04	0.1	0.45	0.11	0.07	0.06	0.04	0.34	0.09	0.18	0.19	0.02	0.2	0.04	0.06	0.06	0.05	0.04	0.26	0.74	0.59	0.23	0.47	0.2	0.19	0.23	0.24	0.13	0.04	0.06	0.01	0.14	0.05	0.26	0.49	0.13
ENSMMUG00000001657	4.09	5.17	6.05	4.02	2.37	2.19	3.08	3.26	4.45	3.15	6.1	3.89	2.75	2.42	3.44	3.8	4.69	5.72	5.7	4.02	2.52	2.1	3.7	2.09	4.51	5.9	9.47	6.2	4.92	5.77	5.18	8.03	2.89	3.17	3.37	2.5	2.43	1.74	2.17	2.71	4.55	3.71	5.76	3.54	3.32	2.25	3.67	4.41	5.03
ENSMMUG00000001658	4.11	4.38	3.95	3.94	2.85	3.2	3.77	3.54	8.58	7.03	8.2	9	6.75	7.83	8.35	7.44	6.04	7.03	6.76	6.45	5.77	7.21	7.14	7.83	4.48	4.77	3.53	3.51	4.71	4.17	4.88	4.24	2.48	2.61	2.17	2.38	2.42	2.33	2.36	2.65	9.29	8.61	9.59	8.82	8.09	8.75	11.49	10.57	5.87
ENSMMUG00000001659	1.22	1.66	1.39	1.11	1.12	0.99	1.11	1.29	1.13	1.03	1.22	1.17	0.86	0.8	0.86	1.14	0.65	0.9	0.91	0.92	1.06	0.8	0.48	0.82	0.85	0.97	1.2	1.32	1.18	0.95	1.18	1.73	4.75	4.97	4.5	4.7	4.61	4.36	4.23	4.58	3.28	3.09	3.1	3.03	3.32	2.46	3.1	2.79	2.07
ENSMMUG00000001660	0.05	0.09	0.01	0	0.23	0	0.12	0.06	0	0.04	0.03	0	0.15	0.07	0.06	0	0.02	0.07	0.05	0.06	0.08	0.03	0.06	0.03	0	0.02	0.13	0	0.14	0.11	0.16	0.12	0.05	0.11	0.04	0.06	0	0.02	0	0.17	0.01	0.13	0.05	0.04	0	0.05	0.06	0.09	0.08
ENSMMUG00000001661	53.02	52.24	54.94	58.93	68.18	69.33	49.4	67.53	82.92	101.36	104.96	74.64	85.55	98.88	78.12	80.62	54.54	46.54	60.98	66.43	54.43	63.65	84.68	50.55	45.19	38.07	34.45	41.46	47.67	43.47	54.83	34.95	58	78.72	70.45	82.07	94.64	117.73	102.32	99.67	125.99	115.49	98.03	106.94	89.43	120.94	97.26	105.95	113.46
ENSMMUG00000001662	0.19	0.18	0.29	0.3	0.25	0.56	0.18	0.28	0.43	0.37	0.25	0.2	0.47	0.23	0.34	0.35	0.29	0.1	0.38	0.39	0.27	0.39	0.29	0.35	0.18	0.27	0.25	0.32	0.29	0.2	0.26	0.2	1.18	0.88	0.88	0.98	1.29	1.16	1.54	1.28	0.34	0.61	0.36	0.57	0.5	0.63	0.47	1.05	0.73
ENSMMUG00000001663	1.05	1.21	1.38	1.01	1.25	1.26	1.17	1.14	1.95	2.31	1.75	2.17	1.65	1.64	1.51	2.02	0.93	0.92	1.25	1.45	0.87	1.31	1.05	1.17	1.11	1.26	1.12	1.08	0.96	1.49	0.97	1.51	90.02	84.23	83.79	68.36	51.16	46.03	56.29	44.45	183	219.71	118.44	119.91	107.45	130.75	91.5	94.61	122.93
ENSMMUG00000001664	0.03	0.01	0.01	0.01	0.04	0.02	0.02	0.02	0.05	0.01	0.02	0	0.01	0.03	0	0.01	0	0.03	0	0	0.04	0.01	0	0.02	0	0.02	0	0.02	0.02	0.01	0.02	0.04	0.05	0.04	0.01	0.06	0.02	0	0.04	0.02	0	0.03	0.04	0.04	0.01	0.02	0	0.01	0.02
ENSMMUG00000001665	0	0	0	0.05	0.01	0	0	0	0.01	0	0	0	0	0	0	0	0	0	0	0	0.05	0	0	0.1	0	0	0	0	0	0	0	0	0	0	0	0	0.03	0	0	0.03	0	0	0	0	0	0	0	0	0
ENSMMUG00000001666	0.11	0.09	0.08	0.01	0	0.01	0.01	0.01	0.02	0.01	0.08	0.06	0.03	0.16	0.08	0.01	0.02	0.02	0.07	0	0.04	0.13	0.05	0	0.05	0.04	0.02	0.03	0	0	0	0.04	0.92	0.89	0.95	1.04	1.27	1.73	1.56	1.24	0.03	0.01	0.11	0.01	0.09	0.06	0.01	0.05	0.04
ENSMMUG00000001667	0	0.12	0	0.06	0	0.04	0	0.02	0	0	0	0	0	0	0	0	0	0	0	0.06	0	0	0.1	0	0.03	0.03	0	0	0.06	0	0	0	0.81	0.61	0.4	0.44	0.36	0.29	0.34	0.2	0	0	0	0	0.08	0.02	0	0.05	0.03
ENSMMUG00000001668	1.52	2	1.31	2.17	1.65	1.88	1.46	2.42	1.3	1.84	1.23	1.76	1.61	1.16	2.08	1.97	1.34	1.77	1.07	1.61	1.73	1.26	1.28	0.97	0.87	2.07	0.81	1.97	1.61	1.42	2.11	2.08	5.18	6.97	3.19	7.02	6.04	3.5	5.32	5.4	4.57	7.18	2.26	3.59	3.83	2.4	3.79	3.84	4.9
ENSMMUG00000001669	5.95	6.05	6.04	5.69	6.24	6.12	5.51	5.71	7.31	6.7	9.82	8.52	9.14	9.71	9.31	8.67	5.36	4.56	6.01	6.49	6.29	7.86	8.55	7.83	5.52	5.09	5.87	6.17	6.2	7.99	6.46	5.63	11.83	14.04	11.41	13.8	14.84	17.08	18.79	15.9	9.71	10.16	8.48	10.07	9.51	9.07	9.09	9.9	9.42
ENSMMUG00000001671	0.86	0.86	0.87	1.13	0.67	0.85	0.53	0.68	0.64	0.52	0.78	0.79	0.91	0.83	1.09	0.7	0.77	0.33	0.81	0.66	0.45	0.62	0.42	0.54	0.42	0.4	0.77	0.56	0.64	0.9	0.84	0.54	57.08	59.32	56.6	60.49	64.17	57.79	59.06	58.05	63.22	69.48	66.33	71.36	64.38	69.51	79.05	67.18	58.28
ENSMMUG00000001672	0.02	0.02	0.01	0.01	0.02	0.04	0.01	0.03	0.04	0.02	0	0.03	0	0.01	0	0.02	0.05	0.02	0.04	0	0.01	0	0.01	0	0.02	0.02	0	0.01	0.01	0	0	0	0.01	0.04	0.06	0.06	0	0.02	0.01	0.03	0	0.02	0.01	0.09	0.03	0.01	0.01	0.02	0.01
ENSMMUG00000001673	11.15	12.21	11.47	10.53	9.37	7.98	7.72	8.39	13.56	12.88	17.8	14.97	16.69	16.37	15.5	14.11	12.17	13.5	13.04	13.34	13.71	14.82	17.06	15.55	13.58	13.14	22.71	19.01	17.29	25.39	18.44	20.04	15.76	22.7	18.89	19.8	23.32	27.41	24.16	24.86	17.85	18.04	17.48	19.6	21.75	18.72	22.31	17.88	15.87
ENSMMUG00000001674	0.72	0.9	0.82	0.53	0.71	0.82	0.96	1.21	1.05	1.47	1.49	1.26	1.24	1.63	1.43	1.6	0.95	0.7	1.44	1.37	1.01	1.2	1.62	1.65	0.92	0.98	0.79	0.86	0.87	1.11	1.14	1.09	94.48	100.23	83.53	68.61	36.64	43.29	45.23	38.74	49.84	59.14	38.72	42.75	39.71	42.61	35.3	33.64	47.91
ENSMMUG00000001675	8.71	8.08	8.38	7.9	8.21	7.75	7.73	7.71	6.32	5.86	8.45	6.65	8.14	7.82	8.85	8.32	5.89	5.71	6.37	7.39	7.59	7.53	8.84	7.42	7.63	6.22	8.95	6.56	8.49	9.45	9.17	9.4	13.23	14.96	13.01	15.01	16.7	17.24	17.67	16.76	10.83	10.46	10.53	10.9	11.57	11.43	11.74	11	8.38
ENSMMUG00000001676	0.34	0.4	0.84	0.09	0.1	0.19	0.07	0.14	0.47	0.22	0.39	0.2	0.06	0.3	0.22	0.17	0.21	0.16	0.5	0.37	0.15	0.25	0.1	0.19	0.41	0.34	0.92	0.22	0.11	0.73	0.09	0.1	0.28	0.37	0.7	0.24	0.09	0.18	0.3	0.4	0.24	0.39	0.73	0.15	0.18	0.24	0.17	0.13	0.4
ENSMMUG00000001677	7.83	7.71	10.04	8.23	6.84	6.45	10.43	8.03	10.17	7.97	12.77	10.11	13.22	13.32	14.63	11.53	9.2	7.94	9.41	9.33	10.67	9.51	14.72	12.05	11.31	10.78	15.1	13.69	14.24	19.95	12.8	18.54	60.32	74.91	57.37	64.77	66.48	86.85	77.79	67.58	11.01	7.95	10.76	11.24	11.5	11.58	12.12	12.72	9.56
ENSMMUG00000001678	1.87	1.32	0.39	0.85	0.15	0.09	0.64	0.22	0.23	0.26	0.11	0.02	0	0.02	0.04	0.05	0.06	0.1	0.01	0.02	0.01	0.02	0.07	0	1.36	1.75	3.84	2.21	2.23	4.95	1.22	1.76	0.05	0.11	0.05	0.08	0.29	0.05	0.03	0.02	0	0.07	0.01	0.03	0.07	0.02	0	0	0.16
ENSMMUG00000001680	5.84	6.08	6.75	6.8	6.97	7.33	4.95	7.67	5.95	7.52	5.64	6.75	5.39	5.94	5.42	6.23	4.46	4.56	5.73	6.72	5.98	5.22	3.33	5.58	5.77	5.83	5.42	5.51	5.57	4.63	5.5	5.62	13.61	14	19.46	15.67	15.75	12.27	12.77	13.73	12.47	17.37	16.85	16.9	17.16	13.87	15.81	15.73	12.6
ENSMMUG00000001682	106.91	114.74	116.94	110.55	103.77	107.93	95.6	109.92	92.75	89.44	117.45	86.66	89.33	97.05	91.28	90.57	79.66	80.3	98.34	100.5	78.76	82.79	100.52	81.39	74.5	80.08	106.66	79.02	83.05	103.14	92.32	89.54	64.29	73.72	89.65	71.23	69.99	83.19	70.39	78.4	85.24	92.2	98.98	82.84	71.33	95.56	81.83	89.79	98.32
ENSMMUG00000001683	0.1	0.12	0.09	0.15	0.15	0.11	0.18	0.07	0.09	0.1	0.09	0.19	0.11	0.07	0.2	0.22	0.12	0.09	0.15	0.17	0.15	0.18	0.1	0.04	0.1	0.04	0.17	0.09	0.1	0.12	0.12	0.14	0.38	0.42	0.44	0.82	0.37	0.5	0.68	0.69	0.05	0.1	0.07	0.1	0.06	0.11	0.07	0.12	0.08
ENSMMUG00000001684	0	0	0	0	0	0	0	0	0	0	0	0	0	0	0	0	0	0	0	0	0	0	0	0	0	0	0	0	0	0	0	0	0.16	0.2	0.04	0.16	0.12	0.03	0.08	0.03	0.33	0.32	0.1	0.17	0.15	0.2	0.08	0.09	0.45
ENSMMUG00000001685	0	0	0	0	0	0	0	0	0	0	0	0	0	0	0	0	0	0	0	0	0	0	0	0	0	0	0	0	0	0	0	0	0	0.05	0	0.04	0	0	0.01	0	0.07	0.01	0	0.02	0	0	0	0.03	0.03
ENSMMUG00000001686	1.52	1.5	1.16	1.34	0.9	1.14	1.01	1.32	0.7	0.56	1.15	0.56	1.01	1.43	1.47	1.37	0.45	0.71	1.14	0.78	1.28	1.37	0.97	1.32	0.84	1.14	2.22	1.76	1.33	1.73	1.75	1.73	0.7	1.55	1	0.87	1.36	0.87	1.71	1.15	0.58	1.03	0.78	0.84	1.11	2.03	1.21	1.07	0.88
ENSMMUG00000001687	127.87	115.11	108.11	108.04	117.4	121.34	126.18	108.26	85.6	87.58	62.67	58.16	70.71	57.62	69.93	66.12	60.07	65.84	67.12	60.92	62.96	49.7	51.41	51.35	67.56	75.14	169.99	120.44	118.16	109.98	136.09	120.11	22.78	22.21	20.23	13.75	13.7	16.28	18.32	19.25	28.28	32.28	37.91	32.33	47.77	38.09	65.43	41.35	60.58
ENSMMUG00000001688	0.05	0.05	0	0.22	0.08	0.01	0.02	0.01	0.1	0.05	0	0.06	0.04	0	0	0.21	0.04	0	0	0.15	0	0.03	0.07	0	0.05	0	0	0.17	0.08	0.07	0.13	0.05	0.02	0.04	0.03	0.09	0.04	0	0.19	0.31	0	0	0	0.24	0.17	0	0.03	0.07	0
ENSMMUG00000001689	39.99	35.67	51.26	35.98	39.7	32.4	32.44	33.97	25.85	17.28	25.04	24.09	29.8	22.69	29.76	29.51	22.47	19.05	35.41	28.67	27.92	20.39	22.27	21.66	35.52	36.14	50.52	51.62	47.69	51.66	54.28	49.59	20.11	15.59	17.24	15.28	16.1	18.56	16.49	22.14	33.24	35.58	47	41.39	52.23	35.25	55.79	48.32	40.24
ENSMMUG00000001690	104.43	101.79	97.69	88.47	58.76	66.68	66.66	74.69	61.61	44.09	71.46	64.93	58.03	62.98	70.87	70.56	57.75	59.99	67.01	68.34	71.7	61.09	72.47	65.2	71.38	70.42	97	84.63	73	84.9	83.17	95.06	80.25	83.41	76.9	72.88	67.46	66.68	57.4	68.67	59.75	55.76	64.49	57.46	52.15	65.29	65.55	60.32	67.42
ENSMMUG00000001692	0.43	0.18	0.36	0.3	0.14	0.37	0.33	0.55	0.27	0.52	0.13	0.38	0.08	0.21	0.48	0.22	0.12	0.28	0.9	0.31	0.22	0.21	0.07	0.37	0.41	0.22	0.81	0.63	0.26	0.36	0.1	0.29	0.46	0.77	1.12	0.38	0.48	0.24	0.16	0.34	0.1	0.29	0.38	0.2	0.37	0.32	0.59	0.33	0.6
ENSMMUG00000001693	16.33	16.66	19.82	17.2	20.38	19.54	16.14	19.42	14.32	16.2	18.22	13.19	13.06	13.79	15.59	14.16	12.36	10.8	13.59	14.22	11.62	9.93	14.36	12.49	10.69	10.87	13.23	11.24	11.34	12.28	13.52	11.08	19.76	18.27	22.6	19.45	18.36	16.71	18.1	19.12	16.72	22.05	21.99	20.56	17.39	21.04	21.22	20.22	18.62
ENSMMUG00000001694	1.2	1.41	0.94	1.02	0.89	0.87	1.14	0.98	1.27	0.71	0.92	1.58	1.09	1.01	1.64	1.31	1.19	1	0.85	1.59	1.38	1.77	1.92	0.87	0.86	0.92	0.9	0.82	0.97	1.1	1.54	1	0.26	0.18	0.37	0.14	0.39	0.31	0.75	0.62	1.21	1.27	0.65	1.01	1.08	1.17	0.99	1.17	1.27
ENSMMUG00000001695	0.1	0.08	0.19	0.07	0.06	0.11	0.09	0.05	0.29	0.38	0.94	0.47	0.89	0.69	0.58	0.63	0.49	0.16	0.83	0.35	0.67	0.89	0.63	0.73	0.15	0.16	0.14	0.11	0.09	0.09	0.25	0.1	0.11	0.18	0.17	0.07	0.21	0.16	0.2	0.11	0.57	0.37	0.57	0.52	0.7	0.67	0.34	0.22	0.27
ENSMMUG00000001696	0	0	0.03	0	0.06	0	0.04	0.02	0	0.01	0.04	0	0	0.02	0.01	0.05	0	0	0.01	0	0.02	0.06	0	0.06	0.03	0.01	0.05	0.01	0	0	0.02	0	0.03	0.05	0	0	0.03	0.08	0.04	0.01	0	0.01	0.05	0	0.02	0.01	0	0	0.01
ENSMMUG00000001697	10.86	9.68	8.46	9.6	6.03	5.27	3.44	2.95	2.16	2.24	4.02	3.45	3.28	2.86	2.67	2.57	1.42	1.79	2.96	2.85	2.94	2.31	3.26	3.03	6.07	23.23	17.83	10.46	10.85	9.25	4.61	4.44	3.12	3.77	3.68	2.93	3.61	2.93	2.98	3.14	4.62	5.32	5.58	5.11	5.44	4.6	5.1	4.88	2.36
ENSMMUG00000001698	0	0	0	0	0	0	0	0	0	0	0	0	0	0	0	0	0	0	0	0	0	0	0	0	0	0	0	0	0	0	0	0	0	0.07	0	0	0	0.02	0.02	0.04	0.16	0.12	1.22	0.05	0.27	0	0.24	0.42	0
ENSMMUG00000001699	0.07	0.15	0	0.01	0.02	0.17	0.03	0.08	0.13	0.02	0.11	0.08	0.03	0	0.09	0.02	0.03	0.17	0.05	0.04	0.14	0.03	0	0	0.08	0.08	0	0.14	0.12	0	0.06	0.16	1.84	1.43	1.37	2.18	1.35	1.3	1.08	2.15	0.29	0.24	0.23	0.3	0.18	0.02	0.23	0.13	0.36
ENSMMUG00000001700	15.07	17.48	18.77	17.5	19.24	20.41	15.12	20.67	17	18.43	17.78	15.94	13.55	12.71	13.07	12.99	10.83	10.92	12.58	13.66	10.58	10.67	11.48	10.42	11.02	11.08	11.51	12.36	11.03	11.22	13.87	13.44	22.62	22.68	18.31	20.54	22.21	19.28	17.72	19.25	15.76	17.18	16.24	17.83	14.2	15.8	17.61	16.35	18.2
ENSMMUG00000001701	8.44	8.54	8.79	8.34	6.14	6.53	6.88	7.43	7.41	6.96	9.17	7.53	6.96	7.71	8.69	7.6	8.12	8.04	8.01	8.91	8.59	5.99	8.52	9.25	8.8	8.95	10.22	8.16	7.32	7.57	8.65	9.8	7.08	9.47	5.93	7.64	7.07	6.86	7.03	7.13	9.09	9.65	9.37	9.76	7.65	7.4	10.93	9.7	7.03
ENSMMUG00000001702	1.17	1.9	1.23	1.45	0.98	1.01	1.78	1.25	1.04	1.11	1.26	2.08	1.66	1.08	2.35	2.35	1.22	1.22	1.03	1.79	1.48	1.87	2.1	2.03	1.12	1.48	1.22	1.34	1.37	1.43	1.75	1.8	10.98	9.11	10.87	12.2	13.54	8.04	12.44	11.03	8.3	6.97	5.48	7.88	8.72	9.77	9.52	10.01	7.67
ENSMMUG00000001703	0.01	0.01	0	0	0	0	0	0	0.01	0.01	0	0	0	0	0	0	0	0	0	0	0.01	0	0	0	0	0.01	0	0.02	0	0	0	0	0.01	0	0.02	0	0	0	0	0	0	0	0	0.01	0	0	0	0	0
ENSMMUG00000001704	0.44	0.63	0.42	0.52	0.76	0.79	0.55	0.94	0.64	0.44	0.36	0.6	0.68	0.34	0.69	0.52	0.79	0.8	0.91	0.73	0.6	0.84	0.59	0.61	0.7	0.75	0.86	0.76	0.41	0.93	1.01	1.06	2.5	2.89	2.86	2.59	1.74	1.95	2.04	2.31	0.64	0.96	1.04	0.88	0.93	0.88	0.4	1.18	0.55
ENSMMUG00000001705	0.25	0.26	0.25	0.22	0.13	0.1	0.14	0.09	0.23	0.25	0.23	0.22	0.25	0.21	0.32	0.22	0.25	0.33	0.19	0.22	0.06	0.11	0.12	0.08	0.32	0.38	0.21	0.18	0.16	0.17	0.2	0.29	3.79	3.66	3.71	3.81	2.8	2.83	3.22	3.31	0.41	0.37	0.29	0.19	0.34	0.35	0.23	0.35	0.26
ENSMMUG00000001706	12.41	9.36	12.45	10.01	9.64	8.66	7.31	8.64	13.46	12.58	13.94	13.54	16.97	17.72	18.21	13.44	11.94	10.91	10.18	14.22	11.3	12.5	13.38	12.89	9.68	8.73	9.96	9.26	10.31	11.76	9.51	11.79	19.98	21.46	19.55	24.37	22.92	25.74	21.17	21.72	25.67	24.63	21.67	24.48	22.28	23.21	26.42	22.63	20.13
ENSMMUG00000001707	3.88	3.98	3.72	3.47	3.62	3.87	3.89	4.26	4.67	5.68	5.38	5.09	6.54	6.09	5.75	5.59	4.25	3.97	4.17	5.77	5.06	4.78	6.18	6.17	3.63	3.39	2.87	2.86	3.82	4.45	3.87	3.16	11.15	11.96	10.08	12.86	12.77	15.49	11.22	11.56	8.61	8.72	8.79	11.06	10.31	9.64	9.4	10.08	8.77
ENSMMUG00000001708	0.94	0.98	1.74	0.72	1.34	0.88	1.2	1.08	4.4	5.1	3.85	6	4.51	6.11	4.69	4.66	2.09	2.59	4.08	3.8	2.37	3.43	2.63	3.43	2.34	3.32	2.13	1.86	1.28	2.56	1.28	0.9	13.69	20.54	16.82	19.91	15.87	24.09	16.04	18.27	3.58	6.22	3.06	3.97	2.05	6.09	1.83	3.5	3.73
ENSMMUG00000001709	0.01	0.01	0.04	0.01	0	0.11	0	0.02	0.03	0	0.02	0.05	0.03	0.05	0.01	0.02	0.03	0	0.03	0.01	0	0.15	0.01	0	0	0.03	0.05	0	0	0.06	0	0.02	0.09	0.03	0.07	0.03	0.04	0.03	0.04	0.07	0	0	0.09	0.02	0.12	0.12	0.01	0	0
ENSMMUG00000001710	0.55	0.26	0.61	0.73	0.42	0.28	0.55	0.22	0.68	0.56	0.42	0.6	0.88	0.48	0.67	0.66	0.79	0.58	0.75	0.71	0.96	0.66	0.55	0.53	0.35	0.46	0.6	0.31	0.73	0.54	0.37	0.28	0.26	0.12	0.31	0.25	1.54	0.26	0.56	0.07	1.43	0.63	0.62	1.13	1.35	0.78	1.21	0.61	1.11
ENSMMUG00000001711	392.79	367.37	407.44	385.06	309.25	305.62	296.41	320.08	345.59	235.96	367.74	332.42	329.66	346.82	387.96	324.54	329.22	272.26	319.46	378.1	315.86	302.47	365.83	344.83	285.68	266.9	418.28	340.11	327.54	358.66	317.61	349.04	355.58	344.93	340.58	348.03	308.97	339.98	290.98	347.81	320.07	297.69	355.72	357.36	323.62	292.71	371.78	318.3	342.53
ENSMMUG00000001712	7.9	7.72	7.73	7.48	8.92	9.36	7.73	7.68	7.2	8.43	8.84	7.32	7.8	8.41	7.75	7.59	6.64	6.65	7.84	6.13	7.18	6.44	9.39	7.36	6.63	7.2	8.34	6.11	7.65	7.24	7.96	6.85	10.12	10.95	11.91	11.01	10.66	9.76	10.98	10.49	11.12	12.17	12.36	11.63	11.52	12.49	11.36	11.79	9.52
ENSMMUG00000001713	5.43	5.82	5.53	4.38	3.63	3.88	5.08	5.15	5.74	5.16	6.28	6.13	5.93	6.23	6.04	6.56	5.33	5.39	5.72	6.16	5.88	5.83	7.25	6.09	5.86	6.26	6.4	5.87	5.48	8.6	6.99	8.76	5.5	5.98	5.59	6.14	5.3	5.54	4.88	5.04	8.81	10.34	9.77	10.86	8.56	8.06	10.49	11.39	8.99
ENSMMUG00000001714	0.6	0.29	0.44	0.61	0.82	0.54	0.52	0.42	0.42	0.46	0.49	0.43	0.77	0.4	0.51	0.36	0.47	0.37	0.55	0.46	0.37	0.29	0.36	0.32	0.49	0.27	0.44	0.3	0.51	0.52	0.52	0.38	4.86	4.25	4.88	4.72	4.48	3.61	4.12	3.85	2.34	2.2	2.07	1.6	2.59	1.97	2.34	2.07	2.25
ENSMMUG00000001715	3.37	2.94	3.4	2.93	2.56	2.69	2.1	2.44	3.11	2.77	3.11	2.84	2.6	2.45	2.85	2.67	2.24	2.48	2.74	2.62	2.13	1.86	2.29	2.66	2.61	2.52	2.78	2.32	2.54	2.33	2.58	2.24	6.93	7.6	6.23	5.37	6.04	5.62	6.07	6.95	4.2	4.45	4.82	3.84	3.74	3.9	3.42	4.22	4
ENSMMUG00000001716	0.03	0	0	0.02	0	0.15	0	0	0	0	0	0	0	0	0	0.04	0.02	0	0.03	0	0	0.29	0.02	0.05	0	0	0	0.04	0	0	0	0	0	0.03	0.1	0	0.04	0.12	0.12	0.16	0.02	0	0	0	0	0.19	0.03	0	0
ENSMMUG00000001717	1.78	2.25	2.64	2.57	2.64	2.4	1.61	2.45	1.7	1.69	1.2	1.49	1.37	1.58	1.26	1.27	1.84	1.42	1.24	1.76	1.39	1.45	1.42	1.15	1.63	2.04	1.44	1.72	1.86	1.46	1.5	1.64	4.28	4.99	4.64	5.32	4.04	4.1	4.44	4.21	4.07	4.22	4.96	4.88	4.37	3.83	3.86	4.21	3.64
ENSMMUG00000001719	0	0	0	0	0	0	0	0	0	0	0	0	0	0	0	0	0	0	0	0	0	0	0	0	0	0	0	0	0	0	0	0	0.21	0.29	0.92	0.34	0.35	0.83	0.49	0.85	0	0	0	0	0.13	0	0	0	0
ENSMMUG00000001720	9.56	8.65	8.67	7.52	5.84	5.75	5.46	5.39	12.05	8.61	11.72	13.11	12.35	11.2	12.65	9.14	15.28	8.29	8.76	9.4	8.07	8.21	8.48	8.16	11.11	8.74	9.09	8.85	9.28	11.2	7.09	7.86	7.46	7.43	8.03	8.24	8.79	9.42	10.49	8.85	14.47	9.82	8.76	9.07	10.65	8.17	8.11	6.69	16.39
ENSMMUG00000001721	0.1	0.07	0.16	0.09	0.07	0.12	0.07	0.12	0.56	0.17	0.24	0.32	0.87	0.34	0.27	0.35	0.27	0.22	0.23	0.18	0.43	0.19	0.18	0.34	0.15	0.21	2.12	1.33	1.04	0.51	0.56	0.33	1.12	0.81	0.98	0.7	0.26	0.4	0.31	0.42	0.17	0.11	0.15	0.13	0.14	0.18	0.09	0.12	0.2
ENSMMUG00000001722	9.1	9.37	8.71	8.26	7.73	7.52	6.08	7.1	7.92	7.45	6.16	6.86	5.91	4.85	6.77	5.94	6.59	6.41	4.56	5.85	5.12	5.15	4.16	4.48	6.63	7.48	5.79	7.28	7.88	6.74	6.42	7.07	19.37	19.82	21.21	19.18	17.65	15.87	18.25	16.97	24.2	28.97	22.87	19.98	19.91	21.01	21.61	19.85	20.71
ENSMMUG00000001723	12.25	11.34	13.66	12.16	10.02	11.12	10.91	14.41	14.2	12.32	21.2	20.22	17.52	22.55	21.89	26.12	16.29	11.04	16.2	19.38	19.95	20.86	26.49	25	15.33	12.38	12.63	14.61	11.62	16.09	15.06	19.2	20.54	21.52	17.8	23.31	19.47	29.8	25.37	26.92	31.15	24.02	29.44	34.74	30.83	33.03	34.87	36.02	26.25
ENSMMUG00000001724	0.07	0	0	0	0.06	0	0	0.07	0	0	0	0	0	0	0	0	0.13	0	0	0.06	0.15	0	0	0	0	0.26	0.11	0	0	0	0	0	0	0	0	0	0	0	0	0	0	0.06	0	0.12	0	0	0	0	0
ENSMMUG00000001725	2.83	3.45	3.42	2.92	2.78	2.89	2.67	3.12	4.31	3.76	4.45	4.3	4.7	5.39	4.25	4.28	4.45	4.09	5.1	5.6	5.01	5.64	6.83	4.64	3.82	4.32	4.44	3.56	4.87	4.65	4.12	4.57	5.88	6.22	6.57	6.68	7.44	7.99	7.64	5.91	5.66	5.28	5.6	5.78	6.2	6.24	4.86	6.72	5.25
ENSMMUG00000001726	0	0.01	0.01	0.02	0.07	0.01	0.02	0.02	0.02	0.02	0.06	0.02	0.09	0.03	0.03	0.03	0.01	0.01	0.06	0.05	0.01	0.02	0	0.03	0.02	0.02	0.08	0.01	0.19	0.06	0.01	0	0.03	0.2	0.06	0.18	0.4	0.09	0.18	0.07	0.01	0.21	0.02	0.07	0.19	0.05	0.1	0.09	0.08
ENSMMUG00000001727	17.98	14.5	22.17	19.83	18.38	19.77	16.35	16.82	15.21	14.11	22.23	18.66	20.02	24.28	18.94	15.52	14.44	10.35	15.92	17.14	21.02	18.68	24.51	14.38	12.62	11.18	14.94	16.17	17.17	16.43	16.33	13.09	58.14	56.89	52.53	61.9	61.23	65.07	59.61	54.48	48.92	44.65	48.7	44.73	45.2	52.4	45.49	40.18	44.64
ENSMMUG00000001728	25.78	27.53	37.72	25.31	26.79	29.64	22.7	29.44	43.26	44.02	56.4	51.38	46.64	49.4	48.92	49.13	32.48	27.04	38.17	41.59	33	34.94	40.51	45.5	31.49	32.29	26.87	23.31	22.55	21.57	25.09	23.64	60.77	55.61	59.55	58.14	68.94	62.96	59.85	64.06	67.54	72.34	78.65	75.79	60.88	71.49	69.52	75.5	55.94
ENSMMUG00000001730	2.78	3.03	3.11	2.82	2.88	2.19	2.35	2.6	2.45	2.27	2.83	2.59	2.27	3.02	2.55	2.91	2.18	1.78	2.1	2.05	1.88	2.67	2.25	2.1	2.67	2.83	2.93	2.7	2.19	3.26	2.33	2.79	7.82	8.21	6.64	9.04	8.29	8.39	11.37	8.26	5.47	5.78	7.1	6.81	6	8.39	7.07	7.21	3.9
ENSMMUG00000001731	1.47	1.43	1.79	1.8	1.49	2.23	1.52	1.61	1.98	1.77	2.79	2.08	2.69	4.35	2.81	2.65	1.81	1.56	2.47	2.03	2.55	3.8	3.05	2.5	1.71	1.89	1.71	1.72	1.22	2.7	1.77	1.33	2.66	4.28	3.4	4.38	3.82	8.06	5.29	3.21	4.19	4.4	5.35	4.61	5.01	9.06	4.47	5.17	2.91
ENSMMUG00000001732	1.35	2.75	3.05	1.99	2.15	3.19	2.55	2.78	4.68	4.33	5.29	3.46	2.65	3.31	3.49	2.51	4.34	2.18	3.76	4.13	3	2.62	1.23	3.98	2.12	2.48	2.35	4.3	0.72	3.25	2.67	4.49	0.72	1.18	1.54	2.5	2.02	0.37	1.17	1.6	1.42	2.54	3.47	2.38	3.89	2.94	2.95	2.85	1.53
ENSMMUG00000001734	0	0.01	0	0	0	0	0	0	0.01	0	0	0	0	0	0	0	0	0.05	0.04	0.01	0	0	0	0.03	0.01	0	0	0.04	0.06	0	0	0	0	0	0	0	0.02	0	0.02	0	0	0	0	0.02	0	0.04	0.01	0	0
ENSMMUG00000001735	5.94	6.25	7.12	8.47	6.05	6.33	5.65	7.21	7.79	9.14	9.71	7.43	6.38	7.43	7.39	6.21	5.77	4.68	5.78	7.16	3.98	3.93	5.85	4.57	4.19	2.62	3.03	4.06	4.31	5.13	4.41	6.35	41.35	46.54	49.8	48.64	45.56	57.91	63.41	41.1	6.78	7.12	4.58	5.9	4.35	3.23	4.86	4.91	8.76
ENSMMUG00000001736	0.02	0.07	0.07	0.11	0.03	0.04	0.01	0	0	0.01	0	0	0	0	0.01	0	0	0	0	0	0	0	0	0	0.01	0.05	0.06	0.11	0.01	0	0	0.04	0	0	0.01	0	0.05	0.03	0	0	0.01	0	0.01	0	0.04	0.05	0	0	0.01
ENSMMUG00000001737	4.24	4.3	5.17	4.6	5.13	4.83	4.99	5.15	4.85	5.2	5.38	5.08	5.03	5.28	5.47	4.84	4.25	3.94	4.42	4.35	4.25	3.82	4.12	3.95	4.03	4.32	4.81	4.51	4.64	4.91	5.31	4.52	11.74	13.19	11.56	11.61	12.22	12.29	12.67	13.03	8.58	8.81	8.79	8.52	8.64	6.95	9.02	8.69	6.82
ENSMMUG00000001738	0	0	0	0.02	0	0	0	0.02	0	0.07	0.03	0	0	0	0	0	0	0	0.02	0.07	0	0	0.04	0	0.02	0	0	0.07	0	0	0	0	0	0	0	0.08	0	0.03	0	0	0.31	0	0.02	0.22	0	0	0.16	0	0
ENSMMUG00000001739	16.94	17.4	18.63	18.23	20.12	23.52	14.79	20.05	22.97	25.4	31.04	22.81	24.39	24.53	21.43	22.75	16.55	14.19	18.12	20.78	15.37	17.31	22.27	17.3	15.55	15.85	14.23	13.14	14.65	16.65	16.99	12.39	26	29.01	26.77	26.34	26	29.14	24.01	24.34	32.87	37.42	35.82	31.89	25.33	35.55	26.97	34.65	28.27
ENSMMUG00000001740	4.62	4.91	4.96	5.71	5.2	5.86	5.38	5.6	2.16	2.65	2.96	2.7	2.41	3.27	2.72	2.65	2.88	2.76	3.28	2.92	3.72	3.82	4.79	4.08	3.9	3.86	4.81	5.51	6.05	6.06	5.11	6.64	20.56	24.58	25.67	20.33	18.94	22.25	19.49	22.68	16.24	18.25	18.84	19.99	15.87	20.77	19.85	20.2	10.75
ENSMMUG00000001741	17.06	17.49	19.65	15.79	16.47	15.56	12.64	15.05	18.6	16.19	17.79	16.56	16.31	16.28	15.71	14.25	15.91	12.76	17.41	16.68	13.83	13.55	14.89	15.3	15.53	14.01	17.77	13.18	12.83	12.31	15.48	13.33	27.74	25.61	24.41	24.8	27.12	24.13	24.03	26.18	33.53	37.4	35.28	32.22	25.26	28.07	25.77	27.43	26.37
ENSMMUG00000001742	0.87	0.74	0.71	0.57	0.91	0.81	0.66	0.9	1	0.76	1.54	1.29	2.05	1.71	1.56	1.6	0.67	0.88	1.2	1.11	1.18	1.5	0.86	0.85	0.6	0.71	0.88	0.57	0.91	1.2	1.21	0.93	2.45	2.64	2.07	1.98	2.89	2.18	2.43	2.26	2.21	2.7	2.57	1.85	3.1	3.75	3.11	2.68	2.09
ENSMMUG00000001743	1.17	1.42	1.37	1.14	1.34	1.21	1	0.92	0.62	0.85	0.84	0.92	1.11	1.17	0.93	0.65	1.01	1.36	0.64	1.2	0.76	1.14	0.47	0.87	1.42	1.52	1.63	1.76	1.21	0.98	1.2	1.4	3.41	4.71	4.06	4.11	3.66	3.17	3.07	3.96	1.79	3.01	1.86	2.03	2.96	2.25	2.62	2.37	1.56
ENSMMUG00000001744	7.41	6.66	7.36	5.25	4.52	4.79	4.62	6.61	6.11	4.31	6.26	5.11	5.57	6.4	6.29	6.16	4.29	3.85	4.82	6.17	4.71	4.4	5.34	4.58	4.8	4.73	6.48	6.03	5.84	6.12	5.95	7.12	8.15	8.63	8.03	9.1	9.24	9.21	9.03	8.44	14.67	13.31	11.98	9.98	12.78	12.26	12.08	12.13	10.94
ENSMMUG00000001745	8.86	9.15	10.86	8.96	8.3	8.64	7.61	9.16	10.03	9.9	13.2	10.9	11.4	11.25	11.34	11.58	7.54	7.17	9.92	10.11	7.96	8.18	10.99	8.95	8.35	7.69	8.66	7.89	8.18	8.09	8.27	7.17	14.77	14.93	14.73	15.07	14.98	16.1	14.19	16.34	13.87	13.67	16.63	14.67	12.75	14.2	13.44	14.92	12.16
ENSMMUG00000001746	0	0	0	0	0	0	0	0	0	0	0	0	0	0	0	0	0	0	0	0	0	0	0	0	0.01	0.01	0	0	0	0	0	0.02	0.02	0	0.01	0	0.03	0.01	0	0	0	0.01	0	0.03	0	0.08	0	0	0.03
ENSMMUG00000001747	5.2	5.18	7.09	5.67	4.88	5.6	5.61	6.8	5.8	7.17	6.52	6.94	6.75	6.46	7.31	6.77	4.86	4.73	7.36	6.21	5.4	5.03	6.79	5.98	6.18	5.12	7.17	6.16	5.39	5.44	6.77	6.62	14.7	13.76	14.28	13.95	12.32	12.95	12.92	13.27	8.85	9.75	9.96	9.25	9.84	9.16	11.51	10.51	9.63
ENSMMUG00000001748	1.23	1.16	1.89	0.93	0.76	0.69	0.72	0.85	1.16	0.74	1.43	0.69	0.92	0.82	1.17	0.79	0.87	0.88	1.08	0.9	0.92	0.79	0.86	0.85	1.3	1.3	2.14	1.19	1.38	1.97	1.54	2.08	0.88	1.08	1.49	0.91	1.16	1.21	0.99	1	1.28	1.32	2	1	1.04	1.07	1.22	0.91	1.27
ENSMMUG00000001750	0	0	0.08	0	0	0	0	0	0	0	0	0	0	0	0	0	0	0	0	0.32	0	0	0	0	0.22	0.12	0.15	0	0	0	0	0	0	0	0.11	0	0	0.13	0.14	0.14	0.17	0.09	0	0.08	0.18	0	0.21	0	0
ENSMMUG00000001751	0.01	0.01	0.01	0	0	0.03	0	0.01	0	0.02	0.02	0	0	0	0	0	0	0	0.03	0.01	0.01	0.02	0	0.03	0	0	0	0	0	0	0.04	0	0.15	0.21	0.15	0.15	0.11	0.13	0.18	0.19	0.15	0.04	0.09	0.11	0.34	0.1	0.14	0.16	0.14
ENSMMUG00000001752	2.19	2.11	6.58	3.58	3.67	2.74	4.36	4.4	10.61	9.47	16.48	14.27	12.66	11.64	11.59	10.39	12.55	7.5	12.09	13.21	11.08	10.43	12.03	12.29	11.28	7.14	4.71	3.03	1.91	2.51	3.51	2.15	0.19	0.1	0.13	0.18	0.13	0.05	0.1	0.12	16.05	11.98	15.85	15.72	9.02	9.48	9.9	10.09	12.88
ENSMMUG00000001753	0.96	0.96	0.83	0.99	0.88	0.94	0.8	0.83	1.06	0.97	1.28	1.02	1.17	1.15	1.18	1.01	0.69	0.62	0.98	0.82	0.83	0.85	0.94	0.83	0.68	0.68	0.97	0.75	0.66	0.74	0.83	0.57	6.92	3.76	4.56	4.87	11.02	5.49	19.29	6.04	5.29	3.47	5.29	3.3	12.03	4.05	18.97	6.16	5.57
ENSMMUG00000001758	18.64	20.44	22.98	18.64	19.45	18.52	14.66	18.74	14.71	14.25	17.16	15.66	16.98	14.12	16.5	16.61	11.46	11.69	13.95	14.11	14.01	12.55	13.81	13.2	14.54	16.14	19.08	15.84	16.13	17.1	16.83	15.95	77.1	81.42	67.34	73.39	70.22	73.72	67.66	67.6	37.82	42.68	43.86	37.31	34.65	39.43	37.77	35.95	31.83
ENSMMUG00000001759	0	0.02	0.05	0	0.02	0	0	0	0	0.11	0.03	0.03	0.06	0	0	0	0	0	0.05	0.02	0	0	0	0	0.02	0	0.09	0	0.05	0	0	0.03	0.06	0	0	0.1	0	0	0	0	0	0.02	0	0	0	0.04	0	0	0
ENSMMUG00000001760	6.21	6.6	7.19	7.77	6.45	6.19	4.73	5.98	6.76	6.5	7.23	8.05	6.67	6.69	5.95	5.73	6.37	5.48	7.33	8.43	5.67	5.74	6.25	6.07	5.57	5.21	6.18	5.39	6.52	5.14	5.4	5.27	43.74	40.39	49.21	43.65	40.6	39.95	42.41	35.66	34.03	31.67	32.7	29.21	29.11	32.19	27.92	27.79	28.36
ENSMMUG00000001761	3.64	3.89	2.7	2.61	1.9	1.84	2.66	2.45	6.12	6.6	5.54	5.01	3.94	3.24	3.63	3.39	4.63	4.95	4.71	4.98	3.04	3.24	3.18	2.56	3.55	4.28	2.46	2.08	1.95	2.01	2.72	1.72	2.91	2.74	2.53	2.91	2.31	1.59	2.37	2.25	9.19	15.03	8.04	6.01	4.91	6.1	5.63	6.23	8.54
ENSMMUG00000001763	5.87	4.95	7.65	7.69	7.39	8.26	6.89	6.58	7.38	6.43	10.53	9.17	11.07	10.44	9.84	9.58	6.63	4.26	7.06	7.4	7.24	7.77	8.25	6.26	6.42	4.78	5.04	5.41	5.01	8.07	6.26	5.47	12.6	15.35	13.31	17.14	13.48	21.25	15.16	15.96	10.36	10.24	9.19	10.93	9.48	9.1	11.82	9.55	9.8
ENSMMUG00000001764	1.7	2.08	1.69	1.06	1.11	0.76	1.24	1.03	1.44	1.48	1.56	1.69	2.43	1.58	2.23	1.89	1.17	1.52	1.14	1.4	1.93	1.36	1.48	2.05	1.5	1.03	0.87	0.94	1.08	1.66	1.3	1.15	2.55	3.19	2.65	2.43	2.93	3.76	3.25	3.07	2.18	2.39	1.85	1.77	2.35	2.12	3.2	2	1.94
ENSMMUG00000001765	0.45	0.5	0.64	0.35	0.16	0.15	0.33	0.34	0.42	0.14	0.34	0.2	0.26	0.23	0.33	0.15	0.23	0.2	0.52	0.36	0.06	0.23	0.4	0.25	0.86	0.55	1.35	0.92	0.79	1.32	1.02	1.19	0.28	0.22	0.33	0.43	0.22	0.24	0.15	0.13	0.37	0.13	0.25	0.21	0.25	0.19	0.33	0.12	0.23
ENSMMUG00000001766	0.35	0.26	0.1	0.27	0.05	0	0.11	0	0	0.14	0	0	0	0	0	0	0	0	0	0.1	0	0	0	0	0.44	0	1.41	0.3	0.95	1.15	0.58	1.36	0	0.23	0.12	0.07	0	0.09	0	0	0	0.06	0	0	0	0.06	0	0	0
ENSMMUG00000001767	0.64	0.52	0.62	0.73	0.48	0.36	0.22	0.26	0.57	0.42	0.55	0.67	0.54	0.6	0.79	0.76	0.25	0.43	0.33	0.49	0.56	0.32	0.4	0.52	0.43	0.4	0.46	0.53	0.55	0	0.46	0.73	0.8	1.15	0.95	0.9	1.56	1.09	1.26	1.14	0.75	0.3	0.85	1.08	0.9	0.73	0.98	0.64	0.5
ENSMMUG00000001768	2.05	1.52	2.13	2.14	2.15	1.67	1.82	2.03	1.73	1.92	1.94	2.13	1.85	1.74	1.97	2.26	1.07	1.39	1.96	1.68	1.58	1.24	1.61	1.44	1.48	1.34	1.34	1.35	1.1	1.35	1.5	1.4	2.78	2.5	2.92	3.03	2.77	3.16	3.14	3.82	2.03	2.05	2.15	2.17	2.06	2.3	2.84	2.22	1.9
ENSMMUG00000001770	1.2	1.33	1.31	1.53	1.46	1.28	1.17	1.16	1.66	1.31	2.22	1.59	1.98	2.54	2.1	2.29	2.09	1.31	1.12	1.05	1.58	1.3	2.31	1.89	1.18	1.27	0.94	0.86	1.35	1.33	1.1	1.86	1.35	1.84	1.5	1.34	2.32	1.61	1.76	2.19	3.27	2.18	2.51	2.55	2.88	2.41	3.04	2.52	2.3
ENSMMUG00000001773	0.78	0.62	0.8	0.56	0.45	0.36	0.37	0.54	0.56	0.52	0.98	0.96	1.08	1.01	0.71	0.76	0.52	0.45	0.95	1.1	0.98	0.76	1.05	0.87	0.67	0.89	0.74	0.93	0.65	0.68	0.75	1.3	0.58	1.03	1.08	1.52	1.07	1.51	1.52	1.74	1.78	1.38	2.94	3.39	3.11	2.38	3.39	3.15	1.78
ENSMMUG00000001774	0.22	0.34	0.37	0.22	0.19	0.43	0.2	0.23	0.37	0.23	0.4	0.47	0.51	0.46	0.36	0.4	0.31	0.09	0.37	0.32	0.18	0.51	0.45	0.68	0.25	0.17	0.29	0.19	0.21	0.41	0.33	0.56	3.25	2.31	2	2.12	1.61	2.63	2.18	2.32	2.5	1.63	3.36	3.16	3.6	5.34	3.92	4.71	2.17
ENSMMUG00000001775	0.02	0	0.05	0	0	0.07	0.07	0.05	0	0	0.03	0	0	0	0	0	0.03	0.05	0	0	0	0.02	0	0	0	0	0	0	0	0	0	0	0.03	0.08	0	0.05	0	0.05	0.03	0	0.05	0.02	0.03	0.02	0	0	0	0	0
ENSMMUG00000001776	0	0	0	0	0	0	0	0	0	0	0	0	0	0	0	0	0	0	0	0	0	0	0	0	0	0	0	0	0	0	0	0	30.9	30.99	28.43	28.61	30.24	42.15	34.48	35.11	47.21	35.38	27.35	28.7	22.45	27.57	24.7	26.75	48.03
ENSMMUG00000001777	0.09	0.12	0.06	0.05	0.12	0.06	0.03	0.08	0.06	0.02	0.16	0.03	0.04	0.09	0.06	0.04	0.01	0.01	0.04	0.03	0.04	0.04	0.06	0.01	0.03	0.02	0.16	0.15	0.13	0.07	0.17	0.05	0.12	0.11	0.12	0.07	0.08	0.05	0.01	0.06	0.05	0.03	0.04	0.03	0.02	0.02	0.11	0.01	0.07
ENSMMUG00000001780	2.36	2.56	1.92	1.75	1.73	1.42	1.83	1.79	2.6	2.07	3.31	2.83	3.13	3.07	2.87	3.16	2.64	2.93	3.29	2.74	2.58	3.22	3.97	2.27	2.24	2.86	2.1	1.52	2.14	2.1	2.86	2.17	11.02	12.24	12.09	9.32	11.71	11.16	11.28	12.92	14	12.66	13.13	9.76	15.43	11.2	12.77	10.64	11.36
ENSMMUG00000001781	1.35	1.38	1.06	0.78	0.71	0.69	0.89	0.67	0.63	0.55	0.98	0.56	0.97	0.65	0.7	0.95	0.58	0.5	0.63	0.61	0.65	0.43	0.76	0.49	1.02	1.15	2.3	1.44	1.36	2.81	1.06	1.97	3.28	2.39	2.24	2.32	3.5	3.52	2.77	2.74	2.28	1.79	2	1.7	2.02	2.27	2.16	1.61	2.04
ENSMMUG00000001782	18.21	19.44	19.5	18.22	16.61	20.91	17.08	21.4	38.72	43.57	35.03	30.98	27.02	32.36	27.26	23.87	29.43	24.16	21.52	26.28	21.75	21.09	28.29	17.85	20.06	16.77	17.56	17.62	19.96	19.96	18.23	16.88	13.08	14.12	11.95	12.09	12.71	15.11	14.27	11.84	42.24	39.74	30.68	30.5	25.92	42.69	23.26	28.66	57.75
ENSMMUG00000001785	1.36	1.59	1.42	1.26	1.48	1.61	1.09	1.07	1.17	1.17	1.27	1.03	1.19	1.18	1.01	1.1	1.18	0.86	1.08	1.22	1.24	1.38	1.29	1.03	0.87	1.09	1.32	0.95	1.33	1.44	1.51	1.59	3.84	3.41	2.53	3.35	3.45	3.55	3.07	2.99	2.18	2.68	3.02	2.7	2.8	2.69	3.58	2.77	2.34
ENSMMUG00000001786	0.62	0.69	0.87	0.83	0.77	0.79	0.44	0.5	0.9	0.8	1	1.19	1.05	0.8	0.77	0.7	0.75	0.76	0.67	1.02	0.55	0.7	0.82	0.49	0.55	0.5	0.46	0.69	0.56	0.66	0.44	0.45	6.66	6.49	6.15	6.21	6.69	7.53	6.52	6.21	4	4.84	6.18	5.56	6.08	5.45	6.86	6.32	4.56
ENSMMUG00000001788	0.02	0	0	0	0	0	0	0	0	0.01	0	0.03	0	0.03	0	0	0.01	0	0	0	0	0	0	0.02	0	0	0	0	0.02	0	0.02	0	0	0.01	0	0.02	0	0.05	0	0.01	0.01	0	0	0	0	0	0	0.02	0
ENSMMUG00000001789	2.51	3.68	2.22	3.59	2.14	3.45	1.77	2.38	1.67	0.96	2.27	2.07	1.49	2.51	1.75	2.37	0.68	0.77	1.88	2.3	1.42	0.9	1.27	0.85	1.37	1.58	2.51	3.98	3.58	3.25	3.87	3.59	0.01	0.03	0.04	0.04	0	0.01	0	0.05	0.4	0.23	0.08	0.33	0.12	0.03	0.07	0.1	1.47
ENSMMUG00000001790	0	0	0	0	0	0	0	0	0	0	0	0	0	0	0	0	0	0	0	0	0	0	0	0	0	0	0	0	0	0	0	0	0.17	0.55	0.16	0.21	0.45	0.68	0.32	0.35	2.1	1.31	2.52	3.03	2.54	3.29	3.28	3.21	0.43
ENSMMUG00000001791	1.29	1.44	1.78	1.6	1.33	1.09	1.27	1.06	2.01	1.56	2.71	1.97	2.39	2.41	2.52	2.34	1.2	0.54	1.37	1.39	1.17	1.36	2.53	1.28	1.17	1.44	1.81	1.35	2.08	2.86	2.05	2.4	2.59	3.03	2.56	3.65	3.57	4.35	3.63	3.38	2.83	2.54	2.58	3.12	3.09	2.76	3.08	2.62	2.43
ENSMMUG00000001792	0.71	0.62	1.28	1.18	0.76	1.05	0.86	0.72	1.35	0.62	1.61	1.42	1.35	1.52	1.23	1.13	1.26	0.66	1.18	1.34	1.32	1.54	1.53	1.17	1.61	1.24	0.81	1.49	0.81	1.43	0.81	0.91	2.33	2.29	2.55	2.58	2.52	4.29	3.53	2.74	3.19	2.51	3	3.01	2.93	3.25	2.54	2.8	2.63
ENSMMUG00000001793	23.72	22.52	29.98	21.36	17.85	18.95	18.35	17.54	30.66	28.55	41.21	35.04	39.25	39.13	42.08	35.71	28.35	22.74	26.89	29.7	31.01	27.84	38.76	29.43	27.69	24.26	25.98	22.46	20.1	34.09	23.66	22.2	43.77	45.3	43.12	44.19	48.66	52.67	46.19	45.34	43.17	38.39	47.72	49.71	47.38	48.02	54.44	48.09	40.79
ENSMMUG00000001794	0	0.06	0	0	0.13	0.13	0.26	0	0.18	0.25	0.12	0	0	0	0	0.2	0	0	0	0.06	0	0.14	0.06	0	0.17	0.26	0.11	0.68	0.4	0	0.4	0	2.07	1.76	1.25	3.02	1.48	1.3	2.45	0.72	2.36	1.48	0.84	1.63	0.73	0.7	1.02	0.71	2.11
ENSMMUG00000001795	0	0	0	0	0	0	0	0	0	0	0	0	0	0	0	0	0	0	0	0	0	0	0	0	0	0	0	0	0	0	0	0	35.85	42.32	41.11	41.65	43.55	48.3	44.73	45.83	30.47	33.14	38.1	39.28	36.61	32.76	40.86	38.93	29.18
ENSMMUG00000001797	0.59	0.47	0.37	0.65	0.4	0.48	0.23	0.4	0.67	0.56	0.82	0.46	1.1	1.07	0.72	0.73	0.26	0.34	0.44	0.44	0.46	0.67	0.41	0.49	0.3	0.31	0.83	0.42	0.47	0.55	0.46	0.21	8.86	5.71	3.4	4.79	1.98	2.94	2.63	3.57	0.82	0.78	0.35	0.6	0.43	0.98	0.77	0.49	0.9
ENSMMUG00000001798	31.19	33.03	39.81	31.72	28.03	28.43	23.79	28.16	33.31	28.95	38.7	34.61	35.98	36.87	33.52	33.6	26.22	22.49	29.11	32.97	29.47	27.62	37.89	30	27.76	25.32	35.55	31.2	32.3	33.83	31.93	35.22	102.82	108.77	108.92	108.52	114.52	119.44	113.14	112.85	114.85	116.76	110.02	112.32	111.91	112.26	107.37	116.73	116.03
ENSMMUG00000001799	17.74	14.11	17.23	13.63	9.82	9.08	9.41	11.42	33.21	17.92	26.29	29.17	28.89	27.32	28.99	27.14	35.28	25.69	20.66	26.8	25.52	25.08	30.12	27.07	27.36	22.41	19.01	18.29	21.88	23.29	16.52	21.95	33.81	30.85	28.47	39.08	38.59	44.03	38.66	37.33	41.38	29.58	27.93	33.54	33.86	30.7	31.85	30.15	37.31
ENSMMUG00000001800	13.2	13.63	15.53	16.49	17.04	16.16	16.25	16.79	11.45	14.58	12.4	14.9	12.74	11.43	14.97	13.2	9.86	10.83	13.02	12.98	12.69	11.27	11.11	12.27	9.43	11.08	11.39	10.49	12.67	10.53	13.73	10.34	20.43	21.45	23.06	23.54	21.84	20.12	21.36	21.29	14.89	20.95	20.23	19.09	21.1	18.23	23.31	18.66	15.35
ENSMMUG00000001801	8.68	8.05	9.74	9.31	9.4	10.67	7.89	8.23	10.35	10.39	10.12	10.09	7.33	8.33	7.73	8.53	9.25	9.41	7.53	8.63	6.49	7.1	8.06	7.04	8.93	9.81	7.85	7.92	8.08	8.61	8.93	9.13	19.28	20.27	21.68	20.02	17.1	16.85	17.73	17.37	44.64	50.62	33.22	34.59	31.84	35.29	32.29	34.01	28.99
ENSMMUG00000001802	0.49	0.51	0.37	0.24	0.14	0.09	0.06	0.11	0.71	0.53	0.37	0.46	0.2	0.29	0.19	0.35	0.62	0.32	0.22	0.44	0.24	0.12	0.12	0.33	0.66	0.69	0.29	0.36	0.18	0.26	0.3	0.12	1.92	1.35	1.07	1.11	0.73	0.71	0.65	0.74	7.43	9.49	8.69	8.57	3.91	6.31	6.4	8.04	5.6
ENSMMUG00000001803	0.09	0.09	0.17	0.12	0.08	0.13	0.19	0.15	0.37	0.2	0.33	0.34	0.4	0.4	0.19	0.55	0.22	0.04	0.24	0.36	0.48	0.42	0.31	0.4	0.18	0.15	0.1	0.19	0.15	0.18	0.17	0.17	0.5	0.31	0.25	0.24	0.48	0.52	0.24	0.46	0.66	0.27	0.43	0.32	1.04	0.48	0.38	0.67	0.61
ENSMMUG00000001804	0	0	0	0	0.02	0	0	0	0	0	0	0	0	0	0	0	0	0	0	0	0	0	0	0	0	0	0	0	0	0	0	0	0	0	0	0	0	0.06	0	0.06	0	0	0	0	0.06	0	0	0	0
ENSMMUG00000001805	0.89	1.3	0.49	0.89	0.44	0.64	0.59	0.35	1.53	1.54	0.46	0.27	0.31	0.34	0.16	0.06	0.92	1.02	0.23	0.18	0.14	0.29	0.16	0.07	1.46	1.01	2.38	1.67	1.33	2.48	1.52	1.99	0.1	0.22	0.11	0.18	0.16	0.11	0.17	0.19	0.35	0.4	0.03	0.08	0.02	0.09	0.12	0.07	0.93
ENSMMUG00000001806	6.25	5.76	6.93	5.19	6.91	5.94	5.91	6.77	6.8	7.76	5.91	6.34	5.76	5.44	7	5.62	4.42	4.46	6.59	5.53	5.29	4.38	4.7	4.66	4.8	6.22	5.31	4.39	4.83	4.52	4.97	6.01	16.86	15.51	17.12	14.44	15.69	13.41	11.31	14.41	8.78	11.38	10.97	9.25	10.94	7.97	9.93	8.36	8.51
ENSMMUG00000001807	1.35	0.88	0.76	0.62	0.87	1.09	0.68	0.77	0.78	0.7	0.48	0.95	0.69	0.81	0.88	1.14	0.64	0.61	0.87	1.07	0.49	0.81	0.34	0.37	0.8	0.45	0.41	0.62	0.46	1.01	0.59	0.36	2.65	2.04	2.41	3.06	1.62	1.59	3.28	2.69	1.72	2.49	1.95	1.9	2.39	2.08	3.62	1.99	2.54
ENSMMUG00000001808	0.85	1.3	1.39	1.1	0.78	0.67	0.49	0.54	1.06	1.48	1.55	0.89	0.49	0.39	0.54	0.82	1.05	2.2	1.82	0.44	0.48	0.85	0.2	1.16	1.6	1.76	1.62	0.53	0.34	0.2	0.35	0.2	4.45	5.65	7.29	3.49	3.65	3.06	2.46	3.87	1.26	3.08	3.16	1.03	1.13	0.54	0.88	1.3	1.18
ENSMMUG00000001809	2.95	3.55	4.1	3.02	3.91	4.48	2.94	3.23	3.9	3.93	4.37	4.3	4.32	4.49	3.55	3.75	3.04	2.78	4.38	3.2	3	4.32	4.07	4.61	3.83	3.89	2.94	2.1	1.65	2.35	2.62	1.93	8.28	9.11	7.07	5.43	7.56	8.01	7.09	8	11.76	15.95	14.79	12.53	10.66	13.38	13.54	12.71	6.67
ENSMMUG00000001810	0.88	1.29	1.19	1.27	1.83	1.69	1.14	1.66	0.58	1.45	0.4	0.56	0.27	0.42	0.44	0.56	0.63	1.11	0.72	0.75	0.35	0.55	0.21	0.59	0.75	1.16	0.6	0.71	0.34	0.75	1.2	0.69	1.81	1.87	1.01	1.38	1.62	1.09	1.4	2.29	1.33	2.11	1.29	1.12	0.9	1.08	1.17	0.93	1.83
ENSMMUG00000001811	0.2	0.2	0.44	0.29	0.24	0.18	0.25	0.21	0.67	1.01	1.12	1.06	1.41	1.36	1.72	1.2	1.06	1.11	1.18	1.01	2.08	1.93	2.62	2.06	0.71	0.6	0.55	0.44	0.38	0.47	0.6	0.45	2.79	2.99	3.39	3.44	3.57	2.99	3.55	3.35	13.88	18	17.04	14.78	17.49	18.71	15.88	19.01	7.09
ENSMMUG00000001812	0.02	0.03	0	0	0.03	0.05	0.01	0.01	0.06	0.02	0.01	0.01	0.03	0	0.02	0.01	0.06	0.01	0	0	0.01	0	0.04	0.01	0.01	0.02	0	0.01	0.02	0	0.04	0.02	0.18	0.06	0.09	0.11	0.1	0.07	0.09	0.02	0.02	0.03	0	0	0.04	0.04	0.07	0.04	0
ENSMMUG00000001813	0.01	0	0.01	0	0.05	0	0.01	0	0	0	0	0	0	0	0	0	0	0	0.06	0	0	0	0	0	0	0.01	0	0.02	0	0	0	0	0.04	0	0	0	0	0	0.07	0	0	0	0	0	0	0	0	0	0
ENSMMUG00000001814	2.38	1.91	3.5	2.55	1.46	1.5	2.21	2.42	2.06	1.37	3.26	2.97	3.35	3.17	2.99	3.13	2.1	2.43	3.01	4.28	2.77	2.91	3.53	2.92	4.13	4.11	6.79	4.67	5.36	8.04	4.05	6.64	3.85	3.81	4.42	4.57	4.18	3.62	4.69	4.68	2.88	3.21	5.19	4.88	3.82	5.8	4.84	5	3.04
ENSMMUG00000001815	0.07	0.03	0.21	0.12	0.06	0.4	0.19	0	0.05	0.04	0	0.34	0.11	0	0.14	0.2	0.59	0.1	0.16	0.18	0.04	0	0.06	0.68	0.3	0.17	0.22	0.4	0.15	0.18	0	0.66	0.29	0.1	0.39	0.24	0.43	0.03	0.23	0.36	0.11	0.06	0.28	0.13	0.31	0.32	0.04	0.18	0.1
ENSMMUG00000001816	34.04	37.56	42.41	29.44	25.66	24.15	26.35	29.55	35.82	30.78	32.46	32.08	26.03	29.7	33.33	26.75	29.67	30.79	26.65	31.52	26.72	23.81	29.1	23.72	33.48	38.07	41.58	35.86	32.44	41.72	39.19	41.1	21.86	21.86	17.54	20.74	18.3	19.09	16.18	21	27.19	32.07	27.39	25.7	26.34	24.54	33.21	26.05	33.51
ENSMMUG00000001817	2.82	1.73	1.67	1.67	1.28	1.05	0.92	1.11	2.77	2.14	1.96	1.79	2.24	1.53	1.36	1.58	2.34	1.91	1.28	1.64	1.57	1.29	0.98	1.35	2.16	1.99	1.38	1.25	1.28	1.5	1.18	1.22	0.97	0.99	0.26	1.04	1.34	0.58	0.93	0.97	1.68	0.79	0.44	0.78	1.02	1.04	0.47	0.87	2.39
ENSMMUG00000001819	9.03	2.7	1.79	1.72	1	1.09	0.9	2.04	3.23	1.96	1.59	2.09	1.47	2.34	2.69	5.02	2.24	2.67	1.02	2.37	1.48	2.07	1.54	1.62	3.69	2.02	2.11	2.23	2.34	2.53	1.56	2.24	1.87	2.35	0.67	2.28	1.89	3.19	1.27	1.66	2.11	1.87	1	2.03	2.97	1.79	1.42	1.45	2.76
ENSMMUG00000001820	1.14	0.7	2.76	1.16	1.52	1.37	1.73	1.17	11.08	10.6	12.37	13.27	11.38	11.3	11.11	10.23	8.18	7.95	10.02	12.38	8.85	8.58	8.58	6.75	6.22	5.75	2.48	1.85	1.59	2.07	2.34	2.08	7.98	8.33	9.67	8.38	6.81	8.34	8.48	7.76	50.88	48.57	23.5	24.39	24.3	23.47	19.56	20.08	32.93
ENSMMUG00000001821	5.71	6.53	8.31	5.62	5.31	5.46	8.03	7.4	3.71	3.5	5.19	5.06	5.2	5.25	5.83	6.08	4.13	5.11	7.46	5.51	6.05	6.63	8.34	7.16	7.65	8.28	12.91	10.99	8.69	12.72	10.27	13.25	9.09	10.01	9.99	10.86	11.52	11.47	12.37	12.78	7.13	7.96	11.61	12.22	11.24	11.05	14.11	13.17	5.39
ENSMMUG00000001824	48.01	45.14	57.13	49.99	44.82	38.52	42.41	50.58	41.35	48.76	48.68	49.47	44.01	39.73	55.15	48.69	49	49.18	48.33	45.77	42.35	41.63	46.14	48.91	41.74	50.38	65.58	52.59	50.84	60.85	52.22	57.16	43.18	42.38	50.22	46.43	44.17	45.56	46.66	50.02	44.09	50.08	50.95	52.92	50.85	43.77	66.67	50.5	39.08
ENSMMUG00000001825	21.4	19.32	19.88	21.17	24.56	24.9	17.02	21.99	13.24	14.58	11.57	12.39	10.23	10.83	11.61	12.39	10.16	10.77	14.85	13.25	10.22	9.29	9.96	13.46	11.13	11.6	10.91	10.76	9.72	7.7	13.15	10.97	51.26	44.06	44.22	38.45	32.86	29.05	29.39	34.82	35.21	43.69	39.77	37.66	31.4	32.73	32.74	33.09	28.32
ENSMMUG00000001826	0	0	0	0	0	0	0	0	0	0.03	0.08	0	0	0	0.03	0	0	0	0	0	0.02	0	0.02	0	0	0	0	0	0	0	0.13	0	0	0.05	0	0.03	0	0	0	0	0.04	0	0.04	0	0.04	0	0	0	0
ENSMMUG00000001827	8.78	9.06	7.08	6.46	5.35	4.45	3.84	4.01	5.56	3.87	3.51	2.67	2.39	1.96	2.26	2.39	5.03	4.15	3.88	3.92	3.05	2.3	2.88	1.86	5.12	4.15	5.31	5.64	4.82	3.47	4	3.63	8.2	8.53	6.35	6.7	5.71	5.4	5.09	5.31	10.45	13.54	7.64	5.79	5.64	6.45	5.34	5.12	11.35
ENSMMUG00000001831	1.8	2.27	2.11	1.82	1.76	1.6	1.44	1.67	1.68	1.66	2.71	2.01	2.04	2.02	2.37	2.67	1.66	1.48	1.74	1.78	1.69	2.19	1.9	1.71	1.63	2.16	2.2	1.65	1.65	2.2	2.23	2.13	6.57	7.44	5.69	6.36	6.56	7.03	7.07	7.77	3.75	4.38	5.65	4.75	6.7	4.76	5.66	5.05	3.85
ENSMMUG00000001833	9.66	10.3	12.2	10.82	11.51	12.25	10.11	11.31	11.14	12.79	14.18	15.41	13.16	12.61	13.36	13.91	10.25	9.7	14.19	14.11	10.86	11.76	10.86	13.26	10.6	11.39	12.54	11.54	8.9	11.76	10.48	11.04	30.1	35.13	28.41	32.12	25.4	28.18	25.81	28.71	21.9	25.19	25.94	28.74	21.54	22.23	23.7	25	20.32
ENSMMUG00000001834	0	0	0	0.02	0.03	0	0.02	0	0.05	0.04	0.03	0.12	0.06	0.04	0	0.11	0	0	0.02	0.05	0	0.02	0	0.02	0.05	0.05	0	0	0	0.03	0	0.04	0	0	0	0.02	0	0.03	0	0	0.02	0.22	0.11	0.13	0.04	0.11	0	0.04	0.24
ENSMMUG00000001835	5.73	6.64	5.64	7.64	8.4	9.35	5.28	6.01	3.83	4.68	3.22	3.83	2.66	3.73	3.26	3.84	3.42	2.25	2.58	2.82	2.07	3.12	3.58	2.71	3.3	3.15	2.53	4.24	3.05	3.1	3.5	1.99	1.6	1.53	0.6	1.13	0.72	0.59	0.53	0.44	6.47	6.18	5.56	7.79	5.81	7.89	6.82	6.26	8.5
ENSMMUG00000001836	0.09	0.04	0.27	0.03	0.08	0.14	0.18	0.03	0.63	0.48	1.94	1.31	2.38	2.36	1.71	2.04	0.47	0.88	0.7	1.23	0.28	1	0.82	0.43	0.34	0.28	0.27	0.14	0.08	0.08	0.15	0.19	1.46	1.31	0.92	1.07	1.71	0.94	0.97	1.37	1.04	0.87	1.28	1.39	2.47	2.31	1.7	2.54	0.85
ENSMMUG00000001837	0.24	0.21	0.15	0.21	0.11	0.06	0.11	0.17	0.18	0.19	0.15	0.2	0.16	0.07	0.11	0.12	0.12	0.22	0.09	0.22	0.09	0.18	0.12	0.12	0.17	0.12	0.15	0.16	0.25	0.15	0.08	0.1	0.26	0.3	0.21	0.24	0.1	0.2	0.1	0.08	0.25	0.25	0.12	0.18	0.2	0.31	0.12	0.25	0.4
ENSMMUG00000001841	14.12	14.27	14.25	13.57	12.9	14.53	11.57	13.73	8.57	7.02	9.67	9.57	8.87	9.32	10.32	10.35	8.48	8.23	10.8	10.71	9.87	10.24	10.48	11.59	12.51	12.86	14.28	12.66	11.14	12.26	13.24	13.91	18.85	18.48	15.64	15.09	14.77	13.73	13.28	16.14	13.12	15.45	17.7	16.79	14.54	17.75	16.11	17.43	11.15
ENSMMUG00000001844	3.63	3.33	3.15	2.88	2.6	2.43	2.79	2.84	3.02	3.32	3.63	3.85	3.86	3.95	4.49	3.82	3.2	3.42	4.71	3.78	5.01	4.5	5.32	5.71	3.22	3.08	3.39	2.19	2.42	2.59	3.32	2.45	3.77	3.06	4.62	4.96	6.1	3.91	5.11	4.98	4.51	6.25	7.46	5.95	6.93	7.45	6.89	7.12	3.36
ENSMMUG00000001845	14.22	11.88	12.99	12.24	8.16	7.98	5.89	8.61	11.68	7.28	11.39	10.04	10.56	11.3	10.83	9.37	10.92	7.77	10.02	11.49	9.07	9.88	12.98	9.45	8.49	8.29	14	14.65	12.78	15.46	9.68	14.33	9.23	8.97	9.07	10.14	10.41	9.84	9.65	11	8.38	7.15	10.07	7.8	7.91	8.28	7.67	8.51	12.27
ENSMMUG00000001846	0.32	0.57	0.13	0.41	0.27	0.29	0.25	0.29	0.27	0.12	0.09	0.12	0.11	0.1	0.09	0.16	0.28	0.24	0.09	0.14	0.07	0.13	0.19	0.07	0.11	0.07	0.04	0.05	0.25	0.12	0.13	0.11	0.3	0.12	0.28	0.14	0.19	0.14	0.17	0.27	1.15	1.94	1.77	0.83	1.21	1.96	0.98	1.31	1.1
ENSMMUG00000001847	1.27	0.91	1.63	1.52	1.4	1.48	0.89	1.02	3.52	2.66	2.85	2.28	2.44	2.07	2.22	2.3	3.81	2.89	1.98	2.3	1.98	1.77	1.35	1.94	2.16	2.45	0.97	1.43	1.02	1.35	0.77	0.95	28.24	23.35	20.53	16.62	13.85	8.89	8.43	10.56	21.86	18.86	15.12	11.78	11.82	13.55	9.89	11.15	11.98
ENSMMUG00000001848	3.98	4.32	3.13	2.96	2.8	2.81	2.78	3.04	3.33	3.29	3.21	3.68	2.89	3.54	2.96	3.14	2.93	4.03	4.54	3.96	4.3	4.37	4.07	3.43	2.97	3.37	3.38	2.38	3.15	3.25	2.6	2.39	9.95	12.49	9.07	10.11	11.87	13.02	10.19	9.49	9.36	8.31	8.92	7.52	8.89	8.8	7.21	7.66	8.89
ENSMMUG00000001849	0.07	0.06	0.05	0.04	0.03	0.06	0.06	0.03	0.01	0.03	0.08	0.01	0.01	0.02	0.01	0.02	0.04	0.06	0.01	0.04	0.02	0.02	0	0.01	0.08	0.12	0.02	0.1	0.15	0.05	0.06	0.08	0.02	0.05	0.04	0.02	0.06	0.05	0	0.06	0.04	0.13	0.03	0.02	0.01	0.01	0	0.01	0.06
ENSMMUG00000001850	122.97	137.71	117.15	85.11	44.05	63.57	62.22	71.79	50.39	31.04	82.03	53.79	48.77	62.33	67.21	72.9	38.3	30.99	62.39	70.2	52.02	61.17	60.89	54.77	52.86	57.69	103.73	93.76	84.69	115.94	85.17	81.87	82.08	93.74	88.3	93.04	71.8	121.09	95.36	76.03	42.05	41.22	50.47	45.71	54.14	48.36	59.7	53.02	57.77
ENSMMUG00000001851	0	0	0	0.02	0	0	0	0	0	0	0	0	0	0	0	0	0	0	0	0	0.05	0	0	0	0	0	0	0	0	0	0	0	0.08	0	0	0.07	0	0	0	0	0	0	0	0	0	0	0	0	0
ENSMMUG00000001852	8.46	10.38	7.5	9.36	9.05	8.85	5.25	6.04	8.79	7.87	6.43	8.35	7.57	7.72	7.55	6.19	9.49	7.93	5.19	6.62	5.44	7.43	10.36	7.64	10.28	10.92	10.93	9.07	10.4	7.97	8	11.58	20.87	23.25	17.42	22.68	26.62	26.21	21.48	19.11	20.9	18.78	22.07	22.01	20.78	21.99	17.43	21.65	9.93
ENSMMUG00000001853	15.27	13.44	17.7	14.74	13.81	13.08	12.82	11.16	20.86	16.49	24.13	20.7	26.32	27.71	26.74	18.8	15.62	11.11	17.43	19	18.36	18.82	25.78	15.98	14.25	12.77	16.9	14.36	15.66	22.17	15.95	13.92	19.33	19.85	16.7	23.26	29.44	29.16	24.62	22.18	35.48	32.02	30.16	36.74	32.34	32.14	39.05	29.37	24.5
ENSMMUG00000001854	0	0	0	0	0	0	0	0.01	0	0	0	0	0	0	0	0	0	0.01	0	0	0	0	0	0	0.01	0	0	0	0	0	0	0	0	0	0.04	0	0.02	0	0	0	0	0	0	0	0	0	0	0	0
ENSMMUG00000001855	6.27	6.8	6.39	6.97	5.31	5.7	3.61	5.86	8.01	5.66	6.75	7.65	8.1	7.33	7.17	7.47	7.11	6.28	5.68	7.42	6.99	7.83	7.46	6.09	7.21	7.24	6.65	6.9	7.45	7.78	6.24	7.53	13.5	12.84	12.43	14.23	13.62	19.8	13.07	14.12	14.58	12.21	13.67	16.2	12.53	15.02	12.89	15.51	10.84
ENSMMUG00000001856	91.18	87.54	88.73	84.28	78.14	76.8	70.9	81.84	86.06	76.69	104.79	83.25	98.69	108.94	104.74	94.36	72.94	65.42	76.59	85.87	85.94	84.99	113.53	86.59	64.73	64.73	77.16	72.9	77.91	83.65	80.26	79.24	101.11	102.92	97.55	104.37	114.23	129.2	116.28	109.84	100.44	97.6	104.53	106.48	96.17	122.09	110.85	106.22	102.27
ENSMMUG00000001858	52.61	53.8	57.49	60.75	58.1	57.56	56.83	59.01	49.2	52.32	57.75	52.94	52.05	53.51	63.33	52.55	39.85	37.52	42.58	46.81	37.94	45.47	43.95	45.8	36.9	37.3	51.65	39.7	37.83	47.76	52.61	37.33	60.81	61.29	70.55	62.98	55.99	58.23	54.51	72.33	39	49.01	49.41	51.98	45.86	47.58	57.93	53.2	47.15
ENSMMUG00000001859	0.02	0	0.02	0.01	0.01	0.03	0	0.06	0.11	0.03	0.16	0.19	0.03	0.12	0	0.04	0.27	0.15	0.15	0.24	0.02	0.14	0.23	0.01	0.04	0.02	0.07	0.04	0	0.01	0.03	0	0	0	0.08	0.01	0	0.03	0	0.03	0.39	0.15	0.05	0.33	0.06	0.2	0.18	0.09	0.11
ENSMMUG00000001860	0.01	0	0.01	0	0.01	0	0.02	0.02	0.02	0	0.01	0	0	0.02	0	0.01	0	0	0.09	0	0	0	0.05	0.06	0.02	0.02	0.01	0	0	0.04	0.02	0.06	0.02	0.03	0.01	0.04	0	0	0.05	0.02	0.03	0.01	0.01	0.05	0.01	0.02	0.06	0.01	0.01
ENSMMUG00000001861	12.85	14.04	16.61	12.83	10.68	12.8	14.19	13.63	9.8	9.5	10.64	10.99	9.83	10.48	11.26	10.82	12.1	13.99	16.31	13.58	13.92	12.61	12.61	14.53	14.52	16.27	22.25	17.47	13.9	18.06	17.79	19.5	17.29	16.64	18.79	15.86	17.4	12.99	15.16	18.77	11.75	14.08	15.29	13.97	13.28	12.2	17.1	14.58	10.37
ENSMMUG00000001862	0	0	0	0	0.01	0	0	0	0.01	0	0	0	0	0	0	0	0	0	0	0.03	0	0	0	0	0.01	0	0.07	0	0	0	0	0	0	0	0	0	0	0.03	0	0	0	0.01	0	0	0	0	0.01	0	0
ENSMMUG00000001863	0.02	0.02	0.01	0	0	0	0.01	0	0	0.02	0	0	0.01	0	0	0.04	0.03	0	0	0.02	0.01	0.01	0.03	0.03	0	0.01	0.03	0.02	0.03	0	0.04	0.04	0.05	0.02	0.08	0.02	0.06	0.03	0	0	0	0	0	0	0	0	0	0	0.02
ENSMMUG00000001864	0	0	0.05	0.02	0.03	0	0	0	0	0	0	0	0	0	0	0	0	0.05	0.02	0	0	0.04	0	0	0	0.07	0	0	0.08	0	0	0	0.03	0.02	0.04	0	0	0	0.02	0.07	0	0	0	0.11	0	0	0	0.02	0
ENSMMUG00000001866	0.04	0.07	0.18	0.09	0.06	0.12	0.06	0.2	0.24	0.15	0.48	0.23	0.28	0.33	0.62	0.38	0.11	0.06	0.36	0.49	0.13	0.67	0.22	0.23	0.02	0	0.22	0.33	0	0	0	0.04	6.42	8.57	7.19	10.58	7.98	9.86	10.24	9.6	0.45	0.17	0.29	0.31	0.49	0.54	0.48	0.69	0.15
ENSMMUG00000001867	0	0	0	0	0	0	0	0	0	0	0	0	0	0	0	0	0	0	0	0	0	0	0	0	0	0	0	0	0	0	0	0	1.77	2.27	1.74	2.5	2.96	2.57	2.3	2.93	1.73	1.62	1.75	2.02	2.8	1.56	1.67	1.67	1.98
ENSMMUG00000001868	0.13	0.2	0.18	0.11	0.15	0.1	0.1	0.13	0.11	0.13	0.23	0.14	0.2	0.18	0.2	0.17	0.11	0.12	0.17	0.22	0.25	0.24	0.22	0.13	0.1	0.09	0.12	0.11	0.08	0.14	0.15	0.12	0.6	0.68	0.62	0.66	0.56	0.81	0.61	0.56	0.39	0.44	0.48	0.41	0.48	0.33	0.63	0.55	0.29
ENSMMUG00000001869	6.23	6.59	7.22	6.94	7.4	6.93	3.96	6.34	6.8	6.38	9.4	7.56	9.93	8.92	7.16	7.85	5.82	4.99	6.15	8.05	8.63	5.76	7.01	6.69	5.23	4.59	6.09	5.93	6.46	6.28	4.31	6.31	10.21	11.64	9.61	12.4	12.8	15.21	12.4	11.72	12.04	10.31	12.55	11.86	11.99	11.43	10	10.33	10.49
ENSMMUG00000001870	0.6	0.84	0.74	0.97	1.23	1.28	1	1.13	0.49	0.59	0.65	0.78	0.97	0.6	0.46	0.86	0.51	0.39	0.6	0.65	0.53	0.54	0.62	0.79	0.48	0.6	0.43	0.66	0.66	0.54	0.95	0.7	1.61	2.44	2.33	2.31	3.04	2.81	2.56	3.04	2.08	1.92	1.79	2.2	1.93	1.97	1.69	2.34	1.61
ENSMMUG00000001871	0.7	0.85	0.83	1.11	1.43	1.41	1.25	1.09	0.6	0.56	0.69	0.64	0.88	0.66	0.87	1.22	0.45	0.73	1.02	0.77	1.33	0.94	0.71	0.79	0.37	0.53	0.39	0.6	0.54	0.4	0.7	0.34	0.44	0.29	0.45	0.51	0.57	0.45	0.49	0.46	0.53	0.42	0.73	0.55	0.81	0.42	0.43	0.75	0.46
ENSMMUG00000001872	1.64	1.31	1.65	1.16	1.18	1.39	0.92	0.85	1.41	1.21	1.14	1.01	0.9	1.12	0.85	1.15	1.57	1.28	1.54	1.39	1	1.06	1.12	1.06	1.66	1.27	1.78	1.36	1.24	1.41	1.06	0.87	10.97	7.77	10.61	8	8.46	7.71	6.51	9.17	2.15	2.21	3.13	3.1	2.02	2.22	1.86	2.47	2.29
[truncated: 25,086 more rows]
[truncated: 17 more columns]

## Sheet: lncRNA RPKM
LncRNA	CB_01F	CB_01M	CB_04F	CB_04M	CB_10F	CB_10M	CB_20F	CB_20M	DG_01F	DG_01M	DG_04F	DG_04M	DG_10F	DG_10M	DG_20F	DG_20M	PFC_01F	PFC_01M	PFC_04F	PFC_04M	PFC_10F	PFC_10M	PFC_20F	PFC_20M	PCC_01F	PCC_01M	PCC_04F	PCC_04M	PCC_10F	PCC_10M	PCC_20F	PCC_20M	CA1_01F	CA1_01M	CA1_04F	CA1_04M	CA1_10F	CA1_10M	CA1_20F	CA1_20M	OC_01F	OC_01M	OC_04F	OC_04M	OC_10F	OC_10M	OC_20F	OC_20M	PC_01F
[truncated: 9,904 more rows]
[truncated: 18 more columns]
