# Supplementary material for: Annotation and cluster analysis of spatiotemporal- and sex-related lncRNA expression in rhesus macaque brain
Source: Genome Res. 2017 Sep;27(9):1608–20. doi: 10.1101/gr.217463.116 (PMC5580719; doi:10.1101/gr.217463.116)
Supplement: Supplemental Material [file supp_gr.217463.116_Supplemental_Table_S2.xlsx]

## Sheet: legend
Supplemental Table S2- LncRNA filtering steps and the homologous analysis with other species.
Filtering: The filtering steps and the number statistics in each step.
Gorilla: The BLASTN alignment result between our predicted rhesus lncRNAs with gorilla lncRNAs from NONCODE.
Human: The BLASTN alignment result between our predicted rhesus lncRNAs with human lncRNAs from NONCODE.
Mouse: The BLASTN alignment result between our predicted rhesus lncRNAs with mouse lncRNAs from NONCODE.
Rhesus: The BLASTN alignment result between our predicted rhesus lncRNAs with rhesus lncRNAs from NONCODE.

## Sheet: Filtering
Type	Number
Total Transcripts	620089
Intergenic & Antisense Transcripts	444833
Distance to gene more than 1000 bp	439230
Removing coding potential and shorter than 200 bp	354097
Single Exon transcripts (gene)	334588 (334588)
Multiple Exon transcripts (gene)	19509 (9904)

## Sheet: Gorilla
LncRNA	Gorilla_LncRNA	Identity	Length	Mismatch	Gap	Q_start	Q_end	O_start	O_end	E-value	Score
XLOC_000002	NONGGOT002292.1	85.32	252	22	3	1305	1541	1142	1393	2e-52	206
XLOC_000002	NONGGOT002292.1	85.32	252	22	3	826	1062	1142	1393	1e-52	206
XLOC_000002	NONGGOT002292.1	85.32	252	22	3	787	1023	1142	1393	1e-52	206
XLOC_000002	NONGGOT002292.1	85.32	252	22	3	776	1012	1142	1393	1e-52	206
XLOC_000004	NONGGOT003264.1	84.44	90	8	2	1066	1155	1621	1538	3e-08	60
XLOC_000009	NONGGOT013734.1	97.24	434	11	1	5	438	433	1	0	757
XLOC_000013	NONGGOT009059.1	88.24	255	24	3	452	701	754	1007	9e-66	250
XLOC_000015	NONGGOT020163.1	88.63	255	25	2	920	1172	2956	3208	8e-70	264
XLOC_000015	NONGGOT020163.1	88.63	255	25	2	1011	1263	2956	3208	9e-70	264
XLOC_000015	NONGGOT020163.1	88.63	255	25	2	893	1145	2956	3208	8e-70	264
XLOC_000015	NONGGOT020163.1	88.63	255	25	2	1189	1441	2956	3208	9e-70	264
XLOC_000016	NONGGOT008215.1	100	24	0	0	899	922	2456	2479	6e-05	48.1
XLOC_000016	NONGGOT008215.1	100	24	0	0	1204	1227	2456	2479	7e-05	48.1
XLOC_000017	NONGGOT013332.1	90.48	84	8	0	774	857	1117	1034	1e-21	103
XLOC_000017	NONGGOT007902.1	92.73	275	19	1	1195	1468	136	410	3e-104	379
XLOC_000020	NONGGOT005293.1	90.83	436	38	2	59	493	3912	4346	6e-151	531
XLOC_000023	NONGGOT000983.1	91.86	848	58	5	1699	2541	842	1	0	1104
XLOC_000023	NONGGOT000983.1	92.88	660	42	3	1316	1972	658	1	0	916
XLOC_000023	NONGGOT000983.1	91.79	828	57	5	209	1031	822	1	0	1072
XLOC_000023	NONGGOT000983.1	91.77	826	57	5	61	881	820	1	0	1068
XLOC_000024	NONGGOT017607.1	97.06	34	1	0	1	34	1129	1162	8e-09	60
XLOC_000025	NONGGOT005422.1	85.86	1047	136	7	4008	5046	2365	1323	0	856
XLOC_000026	NONGGOT018256.1	96.43	28	1	0	1182	1209	2325	2298	0.0002	48.1
XLOC_000026	NONGGOT018256.1	96.43	28	1	0	440	467	2325	2298	0.0001	48.1
XLOC_000031	NONGGOT001585.1	87.7	244	30	0	113	356	1211	968	2e-64	246
XLOC_000033	NONGGOT000056.1	93.6	172	10	1	272	443	1	171	1e-64	246
XLOC_000033	NONGGOT000056.1	93.6	172	10	1	19	190	1	171	2e-64	246
XLOC_000035	NONGGOT016394.1	82.26	124	22	0	1192	1315	372	249	5e-12	71.9
XLOC_000035	NONGGOT016394.1	82.26	124	22	0	1340	1463	372	249	6e-12	71.9
XLOC_000035	NONGGOT016394.1	82.26	124	22	0	1262	1385	372	249	6e-12	71.9
XLOC_000035	NONGGOT016394.1	82.26	124	22	0	1263	1386	372	249	6e-12	71.9
XLOC_000035	NONGGOT016394.1	82.26	124	22	0	733	856	372	249	4e-12	71.9
XLOC_000035	NONGGOT016394.1	82.26	124	22	0	672	795	372	249	3e-12	71.9
XLOC_000035	NONGGOT016394.1	82.26	124	22	0	704	827	372	249	4e-12	71.9
XLOC_000042	NONGGOT000083.1	93.06	72	5	0	172	243	276	347	2e-22	103
XLOC_000045	NONGGOT015202.1	93.55	31	2	0	557	587	2110	2140	0.0001	46.1
XLOC_000045	NONGGOT015202.1	93.55	31	2	0	557	587	2110	2140	0.0002	46.1
XLOC_000045	NONGGOT015202.1	93.55	31	2	0	241	271	2110	2140	8e-05	46.1
XLOC_000045	NONGGOT013855.1	85.86	99	12	1	632	728	193	95	2e-14	79.8
XLOC_000045	NONGGOT013855.1	85.86	99	12	1	198	294	193	95	1e-14	79.8
XLOC_000045	NONGGOT013855.1	85.86	99	12	1	146	242	193	95	1e-14	79.8
XLOC_000046	NONGGOT001945.1	86.92	237	31	0	385	621	2986	3222	6e-58	224
XLOC_000047	NONGGOT000539.1	91.49	47	4	0	467	513	29	75	2e-09	61.9
XLOC_000047	NONGGOT000539.1	91.49	47	4	0	505	551	29	75	3e-09	61.9
XLOC_000047	NONGGOT000539.1	91.49	47	4	0	613	659	29	75	3e-09	61.9
XLOC_000052	NONGGOT000098.1	95.48	177	7	1	1819	1994	1	177	5e-74	280
XLOC_000053	NONGGOT007849.1	100	24	0	0	426	449	4040	4017	2e-05	48.1
XLOC_000056	NONGGOT008924.1	85.9	312	43	1	395	706	488	798	2e-69	262
XLOC_000057	NONGGOT020155.1	89.88	257	21	3	433	688	594	846	8e-69	260
XLOC_000057	NONGGOT020155.1	89.88	257	21	3	1878	2133	594	846	2e-68	260
XLOC_000058	NONGGOT010756.1	100	24	0	0	168	191	489	512	1e-05	48.1
XLOC_000060	NONGGOT008929.1	90.32	93	9	0	131	223	2400	2492	2e-25	113
XLOC_000061	NONGGOT000709.1	90.14	71	7	0	461	531	965	895	1e-16	85.7
XLOC_000061	NONGGOT000709.1	90.14	71	7	0	260	330	965	895	8e-17	85.7
XLOC_000062	NONGGOT016820.1	91.89	111	8	1	1180	1289	1314	1424	6e-33	141
XLOC_000068	NONGGOT015061.1	89.47	38	4	0	94	131	227	190	0.0002	44.1
XLOC_000068	NONGGOT015061.1	89.47	38	4	0	71	108	227	190	0.0003	44.1
XLOC_000068	NONGGOT000556.1	89.62	183	18	1	94	275	1649	1467	2e-52	204
XLOC_000071	NONGGOT007403.1	86.07	244	20	3	1	233	536	776	1e-54	212
XLOC_000072	NONGGOT009264.1	93.18	264	13	2	1247	1510	324	582	1e-101	371
XLOC_000073	NONGGOT014589.1	91.85	233	18	1	4356	4587	567	799	3e-81	303
XLOC_000073	NONGGOT012420.1	94.29	35	2	0	672	706	327	293	6e-07	54
XLOC_000073	NONGGOT012420.1	94.29	35	2	0	858	892	327	293	8e-07	54
XLOC_000073	NONGGOT012420.1	94.29	35	2	0	398	432	327	293	4e-07	54
XLOC_000073	NONGGOT012420.1	94.29	35	2	0	846	880	327	293	1e-06	54
XLOC_000075	NONGGOT003159.1	96.23	53	2	0	24	76	1483	1535	2e-17	89.7
XLOC_000077	NONGGOT015444.1	86.86	236	30	1	824	1059	3243	3009	5e-55	214
XLOC_000078	NONGGOT010322.1	96.61	59	2	0	370	428	311	369	2e-21	101
XLOC_000078	NONGGOT010322.1	96.61	59	2	0	297	355	311	369	1e-21	101
XLOC_000082	NONGGOT009314.1	92.34	209	16	0	883	1091	2762	2554	8e-77	287
XLOC_000086	NONGGOT001150.1	100	30	0	0	317	346	280	251	5e-09	60
XLOC_000087	NONGGOT000171.1	93.5	569	34	2	57	623	1	568	0	821
XLOC_000087	NONGGOT000171.1	93.5	569	34	2	70	636	1	568	0	821
XLOC_000087	NONGGOT000171.1	93.5	569	34	2	224	790	1	568	0	821
XLOC_000087	NONGGOT000171.1	93.5	569	34	2	258	824	1	568	0	821
XLOC_000089	NONGGOT010179.1	88.41	233	26	1	14	246	422	653	7e-63	240
XLOC_000091	NONGGOT009394.1	93.94	33	2	0	291	323	398	430	7e-06	50.1
XLOC_000094	NONGGOT003025.1	90.65	139	11	1	1988	2124	1016	878	2e-40	167
XLOC_000094	NONGGOT003025.1	90.65	139	11	1	1848	1984	1016	878	2e-40	167
XLOC_000094	NONGGOT003025.1	90.65	139	11	1	1661	1797	1016	878	2e-40	167
XLOC_000099	NONGGOT009228.1	93.33	30	2	0	272	301	1132	1103	0.0006	44.1
XLOC_000101	NONGGOT010794.1	100	39	0	0	557	595	90	128	4e-14	77.8
XLOC_000104	NONGGOT016843.1	92.19	64	5	0	4	67	3083	3020	6e-17	87.7
XLOC_000104	NONGGOT008911.1	88.54	96	11	0	1083	1178	215	120	1e-21	103
XLOC_000104	NONGGOT008911.1	88.54	96	11	0	328	423	215	120	5e-22	103
XLOC_000109	NONGGOT009156.1	94.74	38	2	0	1	38	215	178	7e-09	60
XLOC_000112	NONGGOT004662.1	92.44	119	7	1	30	146	359	241	3e-38	159
XLOC_000114	NONGGOT020544.1	80.91	110	21	0	325	434	3613	3722	2e-06	52
XLOC_000114	NONGGOT020544.1	80.91	110	21	0	310	419	3613	3722	2e-06	52
XLOC_000115	NONGGOT000193.1	96.39	83	3	0	1	83	139	221	2e-33	141
XLOC_000115	NONGGOT000193.1	97.96	49	1	0	1	49	173	221	8e-18	89.7
XLOC_000115	NONGGOT000195.1	94.29	280	14	1	82	359	1	280	7e-118	422
XLOC_000120	NONGGOT013304.1	85.71	98	14	0	432	529	4765	4668	8e-16	83.8
XLOC_000121	NONGGOT011238.1	92.75	69	5	0	260	328	1114	1046	3e-20	97.6
XLOC_000122	NONGGOT015553.1	92.16	51	4	0	584	634	51	1	2e-11	69.9
XLOC_000122	NONGGOT015553.1	92.16	51	4	0	303	353	51	1	1e-11	69.9
XLOC_000126	NONGGOT001477.1	93.75	176	11	0	769	944	41	216	2e-69	262
XLOC_000127	NONGGOT000237.1	92.91	141	9	1	83	222	349	489	3e-49	192
XLOC_000129	NONGGOT000087.1	87.55	265	29	3	58	321	1991	1730	1e-63	242
XLOC_000138	NONGGOT000276.1	94.08	169	10	0	64	232	1	169	4e-68	256
XLOC_000139	NONGGOT000281.1	93.62	188	9	2	300	487	1	185	3e-70	264
XLOC_000145	NONGGOT001287.1	93.69	111	6	1	137	246	830	720	4e-38	157
XLOC_000145	NONGGOT001287.1	93.75	112	6	1	137	247	830	719	1e-38	159
XLOC_000145	NONGGOT001287.1	93.75	112	6	1	137	247	830	719	1e-38	159
XLOC_000146	NONGGOT000311.1	93.55	186	6	1	10	195	1	180	6e-74	276
XLOC_000146	NONGGOT000311.1	97.42	155	4	0	192	346	225	379	5e-74	276
XLOC_000148	NONGGOT015363.1	88.03	117	14	0	5963	6079	189	73	3e-26	121
XLOC_000148	NONGGOT009816.1	83.67	245	28	2	612	845	1630	1873	1e-42	172
XLOC_000148	NONGGOT009816.1	83.67	245	28	2	332	565	1630	1873	8e-43	172
XLOC_000148	NONGGOT015363.1	88.03	117	14	0	5987	6103	189	73	3e-26	121
XLOC_000153	NONGGOT000331.1	97.89	473	9	1	1	473	545	1016	0	809
XLOC_000153	NONGGOT000331.1	94.88	332	13	1	385	712	1036	1367	1e-147	521
XLOC_000154	NONGGOT000331.1	91.46	199	16	1	518	715	1372	1570	2e-66	252
XLOC_000154	NONGGOT000331.1	89.6	548	40	3	355	885	1372	1919	0	638
XLOC_000155	NONGGOT003337.1	96.77	31	1	0	1631	1661	594	564	2e-06	54
XLOC_000158	NONGGOT007359.1	87.84	74	9	0	340	413	466	393	1e-13	75.8
XLOC_000158	NONGGOT007359.1	87.84	74	9	0	267	340	466	393	8e-14	75.8
XLOC_000158	NONGGOT007359.1	87.84	74	9	0	373	446	466	393	1e-13	75.8
XLOC_000163	NONGGOT000339.1	98.77	162	2	0	1	162	12	173	3e-83	305
XLOC_000165	NONGGOT016010.1	95.45	44	2	0	193	236	291	248	8e-13	71.9
XLOC_000166	NONGGOT016378.1	90.67	75	7	0	798	872	196	270	1e-18	93.7
XLOC_000166	NONGGOT016378.1	90.67	75	7	0	705	779	196	270	1e-18	93.7
XLOC_000166	NONGGOT018671.1	89.09	55	6	0	312	366	412	466	2e-09	61.9
XLOC_000166	NONGGOT016378.1	90.67	75	7	0	700	774	196	270	1e-18	93.7
XLOC_000166	NONGGOT002178.1	88.48	217	25	0	10	226	1278	1062	2e-42	170
XLOC_000167	NONGGOT019066.1	92	100	8	0	388	487	384	285	2e-31	135
XLOC_000169	NONGGOT016289.1	93.96	149	9	0	2126	2274	1376	1524	2e-57	224
XLOC_000169	NONGGOT016289.1	93.96	149	9	0	2158	2306	1376	1524	2e-57	224
XLOC_000170	NONGGOT000347.1	94.02	351	21	0	373	723	70	420	4e-150	529
XLOC_000174	NONGGOT001346.1	100	37	0	0	13	49	183	147	2e-13	73.8
XLOC_000177	NONGGOT003875.1	92.45	53	4	0	1029	1081	1092	1040	1e-12	73.8
XLOC_000177	NONGGOT000378.1	100	33	0	0	1	33	56	88	3e-10	65.9
XLOC_000181	NONGGOT004456.1	100	22	0	0	752	773	249	270	0.0007	44.1
XLOC_000187	NONGGOT016564.1	96.97	33	1	0	343	375	636	604	2e-08	58
XLOC_000188	NONGGOT004901.1	100	25	0	0	19	43	206	230	3e-06	50.1
XLOC_000190	NONGGOT004271.1	85.93	135	19	0	228	362	308	442	9e-26	117
XLOC_000191	NONGGOT014084.1	100	22	0	0	705	726	323	302	0.0007	44.1
XLOC_000193	NONGGOT009025.1	90.71	183	14	1	1	180	989	1171	4e-58	224
XLOC_000195	NONGGOT006236.1	91.89	37	3	0	512	548	934	898	7e-06	50.1
XLOC_000196	NONGGOT000436.1	94.95	396	20	0	5	400	9	404	3e-179	626
XLOC_000199	NONGGOT017607.1	95.89	73	3	0	1022	1094	1157	1085	5e-27	121
XLOC_000205	NONGGOT014859.1	88.85	269	20	1	825	1093	259	1	3e-82	305
XLOC_000205	NONGGOT007902.1	89.57	278	28	1	1333	1609	141	418	1e-84	313
XLOC_000206	NONGGOT016288.1	89	200	21	1	49	247	3311	3112	2e-55	214
XLOC_000207	NONGGOT016299.1	91.94	248	19	1	26	273	768	522	4e-80	297
XLOC_000208	NONGGOT013306.1	95.24	84	4	0	51	134	762	845	1e-31	135
XLOC_000209	NONGGOT015421.1	100	22	0	0	91	112	150	171	0.0004	44.1
XLOC_000209	NONGGOT015421.1	100	22	0	0	86	107	150	171	0.0002	44.1
XLOC_000211	NONGGOT017776.1	100	25	0	0	229	253	19	43	6e-06	50.1
XLOC_000222	NONGGOT000539.1	92.31	52	4	0	661	712	27	78	3e-12	71.9
XLOC_000224	NONGGOT016299.1	89.51	267	26	2	405	669	789	523	3e-78	291
XLOC_000224	NONGGOT016299.1	89.51	267	26	2	292	556	789	523	3e-78	291
XLOC_000224	NONGGOT005412.1	84.87	119	18	0	112	230	982	864	1e-18	93.7
XLOC_000225	NONGGOT000492.1	92.75	345	24	1	944	1288	79	422	2e-134	478
XLOC_000225	NONGGOT000492.1	93.21	368	24	1	208	575	56	422	2e-148	523
XLOC_000226	NONGGOT000481.1	98.47	196	3	0	137	332	918	723	1e-100	365
XLOC_000226	NONGGOT000481.1	98.47	196	3	0	87	282	918	723	1e-100	365
XLOC_000226	NONGGOT000481.1	98.47	196	3	0	40	235	918	723	1e-100	365
XLOC_000226	NONGGOT000481.1	98.47	196	3	0	37	232	918	723	1e-100	365
XLOC_000226	NONGGOT000481.1	98.45	194	3	0	58	251	916	723	1e-99	361
XLOC_000226	NONGGOT000481.1	98.45	194	3	0	25	218	916	723	1e-99	361
XLOC_000226	NONGGOT000481.1	98.47	196	3	0	9	204	918	723	9e-101	365
XLOC_000226	NONGGOT000481.1	98.45	194	3	0	9	202	916	723	1e-99	361
XLOC_000228	NONGGOT009357.1	89.66	58	6	0	1181	1238	122	65	7e-11	67.9
XLOC_000229	NONGGOT001464.1	94.12	102	6	0	19	120	650	751	3e-37	155
XLOC_000229	NONGGOT001464.1	94.12	102	6	0	13	114	650	751	3e-37	155
XLOC_000230	NONGGOT001464.1	90	120	12	0	184	303	694	813	8e-34	143
XLOC_000231	NONGGOT000112.1	87.63	97	12	0	146	242	739	835	3e-20	97.6
XLOC_000233	NONGGOT001464.1	91.46	82	7	0	1	82	668	749	2e-23	107
XLOC_000237	NONGGOT012389.1	90.62	96	9	0	117	212	347	442	1e-26	119
XLOC_000245	NONGGOT000709.1	90.91	66	6	0	271	336	961	896	3e-16	83.8
XLOC_000246	NONGGOT013455.1	93.33	45	3	0	178	222	45	1	9e-11	65.9
XLOC_000250	NONGGOT015675.1	90.54	222	21	0	1048	1269	11	232	6e-73	274
XLOC_000251	NONGGOT011685.1	88.79	223	25	0	869	1091	764	542	9e-64	244
XLOC_000253	NONGGOT020163.1	92.55	255	18	1	499	752	6416	6670	3e-95	347
XLOC_000254	NONGGOT001730.1	92.99	214	15	0	338	551	203	416	1e-82	305
XLOC_000254	NONGGOT001730.1	92.99	214	15	0	315	528	203	416	1e-82	305
XLOC_000254	NONGGOT001730.1	92.99	214	15	0	275	488	203	416	1e-82	305
XLOC_000254	NONGGOT001730.1	92.99	214	15	0	254	467	203	416	1e-82	305
XLOC_000259	NONGGOT009631.1	87.23	94	12	0	381	474	363	270	2e-18	91.7
XLOC_000259	NONGGOT009631.1	87.23	94	12	0	293	386	363	270	2e-18	91.7
XLOC_000259	NONGGOT009631.1	87.23	94	12	0	177	270	363	270	1e-18	91.7
XLOC_000260	NONGGOT001715.1	98.85	174	2	0	367	540	42	215	1e-89	329
XLOC_000260	NONGGOT018648.1	100	27	0	0	363	389	170	144	9e-07	54
XLOC_000260	NONGGOT001715.1	98.85	174	2	0	69	242	42	215	1e-89	329
XLOC_000260	NONGGOT001715.1	98.85	174	2	0	261	434	42	215	1e-89	329
XLOC_000260	NONGGOT001715.1	98.88	178	2	0	285	462	42	219	3e-92	337
XLOC_000260	NONGGOT001715.1	98.88	178	2	0	289	466	42	219	3e-92	337
XLOC_000260	NONGGOT001715.1	98.85	174	2	0	285	458	42	215	1e-89	329
XLOC_000260	NONGGOT001715.1	97.22	216	5	1	210	425	1	215	9e-103	373
XLOC_000260	NONGGOT001715.1	98.85	174	2	0	44	217	42	215	1e-89	329
XLOC_000260	NONGGOT001715.1	98.88	178	2	0	309	486	42	219	3e-92	337
XLOC_000261	NONGGOT001716.1	97.06	34	1	0	297	330	185	218	5e-09	60
XLOC_000261	NONGGOT001716.1	97.06	34	1	0	743	776	185	218	1e-08	60
XLOC_000265	NONGGOT010054.1	90.91	44	4	0	457	500	319	362	2e-07	56
XLOC_000265	NONGGOT001693.1	92.16	102	7	1	192	293	1	101	5e-30	131
XLOC_000265	NONGGOT001693.1	92.16	102	7	1	189	290	1	101	8e-30	131
XLOC_000265	NONGGOT001693.1	92.16	102	7	1	184	285	1	101	7e-30	131
XLOC_000265	NONGGOT001693.1	92.16	102	7	1	165	266	1	101	2e-30	131
XLOC_000265	NONGGOT001693.1	92.16	102	7	1	134	235	1	101	3e-30	131
XLOC_000265	NONGGOT001693.1	92.16	102	7	1	134	235	1	101	5e-30	131
XLOC_000265	NONGGOT010054.1	90.91	44	4	0	545	588	319	362	2e-07	56
XLOC_000265	NONGGOT011323.1	89.8	255	24	2	81	333	1462	1716	7e-76	283
XLOC_000269	NONGGOT014859.1	86.5	237	30	1	2377	2611	237	1	2e-53	210
XLOC_000269	NONGGOT014859.1	86.5	237	30	1	2315	2549	237	1	2e-53	210
XLOC_000269	NONGGOT014859.1	86.5	237	30	1	2312	2546	237	1	2e-53	210
XLOC_000269	NONGGOT014859.1	86.5	237	30	1	2474	2708	237	1	2e-53	210
XLOC_000274	NONGGOT019802.1	88.37	301	34	1	210	509	974	1274	1e-84	311
XLOC_000274	NONGGOT019802.1	88.37	301	34	1	129	428	974	1274	1e-84	311
XLOC_000275	NONGGOT000753.1	96.43	84	3	0	307	390	407	324	1e-33	143
XLOC_000275	NONGGOT000753.1	96.43	84	3	0	292	375	407	324	6e-34	143
XLOC_000276	NONGGOT000753.1	95.56	135	6	0	1	135	242	108	4e-57	220
XLOC_000276	NONGGOT000753.1	95.56	135	6	0	1	135	242	108	5e-57	220
XLOC_000276	NONGGOT000753.1	95.56	135	6	0	1	135	242	108	3e-57	220
XLOC_000276	NONGGOT000753.1	95.35	129	6	0	1	129	235	107	2e-53	208
XLOC_000276	NONGGOT000753.1	90.62	64	6	0	1	64	171	108	1e-14	79.8
XLOC_000276	NONGGOT018810.1	85.8	162	22	1	306	466	308	469	3e-30	131
XLOC_000278	NONGGOT001672.1	92.79	222	16	0	153	374	50	271	2e-85	313
XLOC_000279	NONGGOT000751.1	97.61	209	4	1	409	616	342	134	4e-101	367
XLOC_000282	NONGGOT020686.1	94.74	38	2	0	115	152	397	360	6e-09	60
XLOC_000284	NONGGOT011956.1	100	22	0	0	353	374	58	37	0.0003	44.1
XLOC_000285	NONGGOT019319.1	100	22	0	0	262	283	98	119	0.0002	44.1
XLOC_000289	NONGGOT000729.1	94.87	78	4	0	161	238	1256	1179	4e-28	123
XLOC_000289	NONGGOT004321.1	93.75	192	11	1	830	1020	147	338	4e-74	278
XLOC_000289	NONGGOT000729.1	94.87	78	4	0	657	734	1256	1179	9e-28	123
XLOC_000289	NONGGOT000729.1	98.92	93	1	0	839	931	1151	1059	1e-43	176
XLOC_000289	NONGGOT000729.1	98.92	93	1	0	751	843	1151	1059	1e-43	176
XLOC_000291	NONGGOT017854.1	87.76	49	6	0	596	644	260	212	1e-05	50.1
XLOC_000291	NONGGOT001651.1	97.28	331	8	1	375	704	1229	1559	3e-164	577
XLOC_000293	NONGGOT014771.1	96.55	29	1	0	838	866	113	85	1e-05	50.1
XLOC_000296	NONGGOT005740.1	89.16	83	8	1	695	776	11	93	2e-16	85.7
XLOC_000300	NONGGOT007939.1	91.67	36	3	0	445	480	198	233	5e-05	48.1
XLOC_000303	NONGGOT008530.1	92.62	149	11	0	2836	2984	843	991	7e-53	208
XLOC_000303	NONGGOT018267.1	89.58	48	5	0	747	794	402	355	5e-07	56
XLOC_000303	NONGGOT018267.1	89.58	48	5	0	518	565	402	355	5e-07	56
XLOC_000304	NONGGOT020662.1	88.1	84	10	0	1258	1341	703	786	9e-17	87.7
XLOC_000308	NONGGOT019276.1	87.26	157	15	2	225	376	456	300	7e-34	143
XLOC_000312	NONGGOT009264.1	87.07	232	19	3	32	253	312	542	2e-55	214
XLOC_000314	NONGGOT000696.1	94.67	75	4	0	773	847	340	266	6e-26	117
XLOC_000314	NONGGOT000696.1	94.67	75	4	0	584	658	340	266	5e-26	117
XLOC_000314	NONGGOT000696.1	94.67	75	4	0	635	709	340	266	5e-26	117
XLOC_000314	NONGGOT000696.1	94.59	74	4	0	505	578	339	266	2e-25	115
XLOC_000314	NONGGOT000696.1	94.67	75	4	0	404	478	340	266	3e-26	117
XLOC_000314	NONGGOT000696.1	94.67	75	4	0	666	740	340	266	5e-26	117
XLOC_000316	NONGGOT012255.1	82.89	339	52	6	420	755	677	1012	4e-40	165
XLOC_000319	NONGGOT001609.1	95.33	214	9	1	312	525	130	342	2e-81	301
XLOC_000320	NONGGOT000688.1	95.98	174	7	0	1	174	283	110	4e-78	289
XLOC_000322	NONGGOT003892.1	82.23	349	49	6	67	405	895	1240	1e-40	167
XLOC_000322	NONGGOT003892.1	82.23	349	49	6	67	405	895	1240	5e-41	167
XLOC_000322	NONGGOT003892.1	82.23	349	49	6	40	378	895	1240	1e-40	167
XLOC_000322	NONGGOT003892.1	82.23	349	49	6	39	377	895	1240	7e-41	167
XLOC_000322	NONGGOT003892.1	82.23	349	49	6	16	354	895	1240	4e-41	167
XLOC_000322	NONGGOT003892.1	82.23	349	49	6	16	354	895	1240	9e-41	167
XLOC_000322	NONGGOT003892.1	82.23	349	49	6	10	348	895	1240	4e-41	167
XLOC_000322	NONGGOT003892.1	81.68	322	47	5	2	313	921	1240	1e-34	145
XLOC_000322	NONGGOT001607.1	95	40	2	0	282	321	173	212	3e-10	63.9
XLOC_000323	NONGGOT015103.1	85.92	632	87	2	50	679	539	1170	2e-150	531
XLOC_000324	NONGGOT001606.1	94.51	255	9	1	1	250	439	693	5e-110	394
XLOC_000326	NONGGOT020697.1	90.79	76	7	0	1495	1570	1097	1022	4e-19	95.6
XLOC_000331	NONGGOT013221.1	94.44	36	2	0	8	43	70	35	7e-08	56
XLOC_000332	NONGGOT019121.1	95.24	42	2	0	76	117	334	293	4e-11	67.9
XLOC_000332	NONGGOT000849.1	87.67	146	16	2	168	312	31	175	4e-30	131
XLOC_000332	NONGGOT001594.1	97.81	228	1	1	546	769	68	295	3e-114	410
XLOC_000332	NONGGOT012151.1	89.25	93	10	0	38	130	1405	1497	2e-22	105
XLOC_000334	NONGGOT013065.1	83.49	109	18	0	335	443	423	315	4e-13	73.8
XLOC_000342	NONGGOT018116.1	89.89	267	23	2	1944	2210	2309	2571	2e-81	303
XLOC_000342	NONGGOT018116.1	89.89	267	23	2	1944	2210	2309	2571	2e-81	303
XLOC_000342	NONGGOT004766.1	91.94	186	15	0	2118	2303	347	162	2e-65	250
XLOC_000342	NONGGOT016755.1	88.17	93	11	0	816	908	188	96	6e-20	97.6
XLOC_000342	NONGGOT018116.1	89.89	267	23	2	2055	2321	2309	2571	2e-81	303
XLOC_000342	NONGGOT004766.1	91.94	186	15	0	2091	2276	347	162	2e-65	250
XLOC_000342	NONGGOT016755.1	88.17	93	11	0	1201	1293	188	96	9e-20	97.6
XLOC_000342	NONGGOT018116.1	89.89	267	23	2	2051	2317	2309	2571	2e-81	303
XLOC_000342	NONGGOT004766.1	91.94	186	15	0	1987	2172	347	162	2e-65	250
XLOC_000342	NONGGOT020269.1	91.49	47	4	0	334	380	1175	1221	2e-09	61.9
XLOC_000342	NONGGOT004766.1	91.94	186	15	0	1871	2056	347	162	2e-65	250
XLOC_000342	NONGGOT016755.1	88.17	93	11	0	543	635	188	96	4e-20	97.6
XLOC_000342	NONGGOT018116.1	89.89	267	23	2	1765	2031	2309	2571	2e-81	303
XLOC_000342	NONGGOT018116.1	89.89	267	23	2	1762	2028	2309	2571	2e-81	303
XLOC_000342	NONGGOT004766.1	91.94	186	15	0	2073	2258	347	162	2e-65	250
XLOC_000343	NONGGOT019383.1	88.72	337	34	2	1534	1866	2109	2445	3e-97	355
XLOC_000349	NONGGOT017510.1	83.53	85	14	0	603	687	430	514	4e-08	58
XLOC_000349	NONGGOT017510.1	83.53	85	14	0	1010	1094	430	514	7e-08	58
XLOC_000350	NONGGOT009561.1	87.41	143	13	2	791	929	379	520	2e-29	131
XLOC_000350	NONGGOT009561.1	87.41	143	13	2	651	789	379	520	1e-29	131
XLOC_000350	NONGGOT007653.1	90.1	101	8	1	1	101	179	277	2e-25	115
XLOC_000353	NONGGOT011646.1	85.11	94	14	0	107	200	43	136	3e-13	75.8
XLOC_000356	NONGGOT006693.1	100	23	0	0	31	53	4	26	7e-05	46.1
XLOC_000362	NONGGOT000924.1	87.72	114	12	1	37	148	754	641	4e-24	109
XLOC_000362	NONGGOT000819.1	94.44	126	7	0	176	301	539	414	1e-49	194
XLOC_000362	NONGGOT015541.1	86.49	222	20	3	147	358	1928	1707	6e-49	192
XLOC_000364	NONGGOT014449.1	87.1	155	19	1	50	203	2	156	2e-25	115
XLOC_000365	NONGGOT009183.1	89.58	48	5	0	17	64	20	67	1e-07	56
XLOC_000367	NONGGOT004382.1	86.05	129	17	1	325	453	214	87	2e-22	105
XLOC_000367	NONGGOT004382.1	86.05	129	17	1	551	679	214	87	3e-22	105
XLOC_000367	NONGGOT004382.1	86.05	129	17	1	540	668	214	87	3e-22	105
XLOC_000367	NONGGOT004382.1	86.05	129	17	1	206	334	214	87	2e-22	105
XLOC_000367	NONGGOT004382.1	86.05	129	17	1	213	341	214	87	2e-22	105
XLOC_000367	NONGGOT004382.1	86.05	129	17	1	228	356	214	87	2e-22	105
XLOC_000368	NONGGOT019383.1	94.7	151	7	1	1	151	2414	2265	1e-59	228
XLOC_000369	NONGGOT013125.1	91.4	93	8	0	2368	2460	581	489	2e-26	121
XLOC_000369	NONGGOT013125.1	91.4	93	8	0	2341	2433	581	489	3e-26	121
XLOC_000370	NONGGOT018281.1	83.93	112	18	0	492	603	161	50	9e-15	79.8
XLOC_000371	NONGGOT016299.1	90.76	249	21	2	709	956	789	542	8e-72	270
XLOC_000371	NONGGOT016299.1	90.76	249	21	2	713	960	789	542	8e-72	270
XLOC_000375	NONGGOT014861.1	100	23	0	0	569	591	286	308	0.0003	46.1
XLOC_000376	NONGGOT016951.1	82.86	70	12	0	261	330	471	540	0.0003	44.1
XLOC_000376	NONGGOT016951.1	82.86	70	12	0	329	398	471	540	0.0004	44.1
XLOC_000376	NONGGOT016951.1	82.86	70	12	0	248	317	471	540	0.0003	44.1
XLOC_000376	NONGGOT016951.1	82.86	70	12	0	343	412	471	540	0.0004	44.1
XLOC_000379	NONGGOT009452.1	83.22	149	25	0	4	152	1864	1716	3e-20	97.6
XLOC_000382	NONGGOT009021.1	93.41	91	6	0	839	929	126	216	1e-30	133
XLOC_000387	NONGGOT013502.1	100	24	0	0	687	710	202	225	5e-05	48.1
XLOC_000389	NONGGOT001765.1	91.82	269	19	2	150	416	1	268	7e-95	345
XLOC_000391	NONGGOT013035.1	86.57	134	12	2	245	376	352	223	2e-25	115
XLOC_000391	NONGGOT017607.1	96.47	85	3	0	296	380	1158	1074	1e-34	145
XLOC_000391	NONGGOT017607.1	96.47	85	3	0	245	329	1158	1074	1e-34	145
XLOC_000397	NONGGOT012726.1	91.67	36	3	0	392	427	1814	1849	2e-05	48.1
XLOC_000397	NONGGOT012726.1	91.67	36	3	0	585	620	1814	1849	4e-05	48.1
XLOC_000399	NONGGOT020428.1	88.46	52	6	0	1040	1091	13	64	2e-07	56
XLOC_000400	NONGGOT001747.1	89.17	351	31	1	1	344	237	587	5e-111	398
XLOC_000400	NONGGOT001746.1	97.06	204	6	0	30	233	70	273	9e-98	357
XLOC_000400	NONGGOT001746.1	97.06	204	6	0	30	233	70	273	7e-98	357
XLOC_000402	NONGGOT013769.1	94.77	153	8	0	231	383	219	67	1e-62	240
XLOC_000402	NONGGOT013769.1	94.77	153	8	0	231	383	219	67	1e-62	240
XLOC_000402	NONGGOT013768.1	88.49	139	16	0	58	196	366	228	2e-35	149
XLOC_000402	NONGGOT013768.1	88.49	139	16	0	58	196	366	228	3e-35	149
XLOC_000403	NONGGOT013981.1	93.24	74	5	0	10	83	2330	2257	3e-23	107
XLOC_000404	NONGGOT014379.1	85.79	985	91	18	2948	3908	19	978	0	761
XLOC_000407	NONGGOT014304.1	82.59	224	38	1	1069	1291	1301	1078	2e-28	127
XLOC_000407	NONGGOT014304.1	82.59	224	38	1	1069	1291	1301	1078	2e-28	127
XLOC_000410	NONGGOT013102.1	91.43	35	3	0	444	478	195	161	0.0001	46.1
XLOC_000410	NONGGOT016040.1	86.71	143	16	1	3	145	2364	2225	8e-30	129
XLOC_000410	NONGGOT017308.1	88.71	248	28	0	587	834	983	736	2e-71	270
XLOC_000410	NONGGOT017308.1	88.71	248	28	0	587	834	983	736	2e-71	270
XLOC_000411	NONGGOT014565.1	84.08	157	21	2	439	591	2258	2414	3e-21	101
XLOC_000412	NONGGOT002292.1	86.54	52	7	0	826	877	4928	4877	6e-05	48.1
XLOC_000413	NONGGOT007902.1	94.37	284	14	1	2940	3223	418	137	2e-119	430
XLOC_000413	NONGGOT007902.1	94.37	284	14	1	2940	3223	418	137	2e-119	430
XLOC_000413	NONGGOT007902.1	94.37	284	14	1	2940	3223	418	137	2e-119	430
XLOC_000413	NONGGOT007902.1	94.37	284	14	1	2940	3223	418	137	2e-119	430
XLOC_000414	NONGGOT003478.1	84.59	305	35	3	1	294	606	303	1e-58	226
XLOC_000414	NONGGOT003478.1	84.59	305	35	3	1	294	606	303	2e-58	226
XLOC_000414	NONGGOT011039.1	87.08	209	26	1	195	402	1206	998	2e-48	192
XLOC_000415	NONGGOT007777.1	85.83	360	49	1	69	428	2043	1686	6e-82	303
XLOC_000416	NONGGOT000944.1	92.68	369	26	1	1	368	1442	1074	5e-144	509
XLOC_000416	NONGGOT000944.1	92.68	369	26	1	1	368	1442	1074	4e-144	509
XLOC_000418	NONGGOT007403.1	88.89	108	11	1	164	271	774	668	5e-24	111
XLOC_000418	NONGGOT007403.1	88.89	108	11	1	164	271	774	668	6e-24	111
XLOC_000418	NONGGOT007403.1	88.89	108	11	1	164	271	774	668	7e-24	111
XLOC_000418	NONGGOT007403.1	88.89	108	11	1	164	271	774	668	5e-24	111
XLOC_000418	NONGGOT007403.1	88.89	108	11	1	164	271	774	668	4e-24	111
XLOC_000419	NONGGOT019571.1	85.56	270	32	3	255	521	422	157	1e-41	168
XLOC_000420	NONGGOT018255.1	87.73	269	31	2	423	691	1700	1434	2e-67	256
XLOC_000421	NONGGOT016299.1	92.25	271	16	3	674	941	521	789	9e-81	301
XLOC_000421	NONGGOT016299.1	92.25	271	16	3	674	941	521	789	9e-81	301
XLOC_000421	NONGGOT016299.1	92.25	271	16	3	674	941	521	789	1e-80	301
XLOC_000421	NONGGOT016299.1	92.25	271	16	3	674	941	521	789	1e-80	301
XLOC_000421	NONGGOT016299.1	92.25	271	16	3	674	941	521	789	1e-80	301
XLOC_000424	NONGGOT004861.1	86.97	238	30	1	374	611	1072	1308	5e-56	218
XLOC_000431	NONGGOT000972.1	90.98	133	12	0	186	318	784	652	7e-42	168
XLOC_000433	NONGGOT000031.1	95.8	119	5	0	477	595	2	120	2e-49	196
XLOC_000433	NONGGOT007232.1	85.42	96	14	0	1277	1372	520	615	3e-14	79.8
XLOC_000433	NONGGOT007232.1	85.42	96	14	0	1262	1357	520	615	3e-14	79.8
XLOC_000433	NONGGOT007232.1	85.42	96	14	0	963	1058	520	615	3e-14	79.8
XLOC_000433	NONGGOT007232.1	85.42	96	14	0	1285	1380	520	615	4e-14	79.8
XLOC_000435	NONGGOT000983.1	87.47	423	35	5	155	573	1923	1515	1e-112	404
XLOC_000435	NONGGOT000983.1	92.47	93	7	0	302	394	1437	1345	7e-30	129
XLOC_000437	NONGGOT003323.1	85.58	104	15	0	1301	1404	249	146	9e-17	87.7
XLOC_000439	NONGGOT020619.1	93.59	78	5	0	3	80	1057	980	8e-26	115
XLOC_000440	NONGGOT004130.1	93.33	30	2	0	177	206	603	632	0.0004	44.1
XLOC_000443	NONGGOT020369.1	100	23	0	0	197	219	3026	3048	4e-05	46.1
XLOC_000445	NONGGOT000536.1	86.09	115	15	1	12	126	323	210	4e-19	93.7
XLOC_000447	NONGGOT006758.1	91.05	190	14	1	359	545	2007	2196	3e-62	238
XLOC_000448	NONGGOT000076.1	95.81	167	7	0	254	420	290	456	5e-74	276
XLOC_000450	NONGGOT013213.1	91.67	144	12	0	414	557	411	268	3e-48	190
XLOC_000450	NONGGOT001117.1	94.21	121	7	0	996	1116	202	322	4e-46	184
XLOC_000451	NONGGOT001835.1	92.11	38	3	0	449	486	404	367	2e-06	52
XLOC_000452	NONGGOT012483.1	95.74	47	2	0	475	521	294	340	3e-14	77.8
XLOC_000453	NONGGOT015696.1	86.73	113	15	0	88	200	457	345	2e-22	105
XLOC_000456	NONGGOT001050.1	87.13	171	19	3	444	613	462	294	5e-33	141
XLOC_000457	NONGGOT015802.1	91.67	48	4	0	36	83	502	455	3e-10	63.9
XLOC_000458	NONGGOT016299.1	87.86	140	17	0	60	199	657	518	5e-34	143
XLOC_000460	NONGGOT001464.1	86.27	102	13	1	234	334	751	650	3e-16	83.8
XLOC_000460	NONGGOT001464.1	86.27	102	13	1	237	337	751	650	3e-16	83.8
XLOC_000461	NONGGOT003150.1	93.16	1477	76	10	11	1479	5533	4074	0	1994
XLOC_000461	NONGGOT003150.1	93.16	1477	76	10	11	1479	5533	4074	0	1994
XLOC_000461	NONGGOT003150.1	93.5	862	43	7	11	868	5533	4681	0	1174
XLOC_000461	NONGGOT003150.1	93.16	1477	76	10	11	1479	5533	4074	0	1994
XLOC_000461	NONGGOT003150.1	93.16	1477	76	10	11	1479	5533	4074	0	1994
XLOC_000461	NONGGOT003150.1	93.16	1477	76	10	11	1479	5533	4074	0	1994
XLOC_000462	NONGGOT003147.1	93.25	637	32	5	1	636	4332	3706	0	894
XLOC_000465	NONGGOT009754.1	86.75	249	33	0	2	250	1599	1847	9e-61	232
XLOC_000466	NONGGOT007839.1	88.75	329	32	2	377	700	568	240	8e-96	349
XLOC_000467	NONGGOT010558.1	96.55	29	1	0	1891	1919	11419	11447	3e-05	50.1
XLOC_000467	NONGGOT001065.1	94.59	148	7	1	1846	1993	213	67	4e-57	222
XLOC_000467	NONGGOT001065.1	95.41	414	18	1	1836	2249	481	69	0	662
XLOC_000467	NONGGOT001065.1	95.41	414	18	1	1836	2249	481	69	0	662
XLOC_000467	NONGGOT001065.1	95.43	416	18	1	1836	2251	481	67	0	666
XLOC_000467	NONGGOT001065.1	95.41	414	18	1	1836	2249	481	69	0	662
XLOC_000467	NONGGOT001065.1	95.41	414	18	1	1836	2249	481	69	0	662
XLOC_000467	NONGGOT001065.1	95.41	414	18	1	1836	2249	481	69	0	662
XLOC_000467	NONGGOT001065.1	95.41	414	18	1	1836	2249	481	69	0	662
XLOC_000467	NONGGOT001065.1	95.41	414	18	1	1836	2249	481	69	0	662
XLOC_000467	NONGGOT001065.1	95.41	414	18	1	1836	2249	481	69	0	662
XLOC_000467	NONGGOT001065.1	95.41	414	18	1	1836	2249	481	69	0	662
XLOC_000467	NONGGOT001065.1	95.41	414	18	1	1836	2249	481	69	0	662
XLOC_000467	NONGGOT001065.1	95.41	414	18	1	1836	2249	481	69	0	662
XLOC_000467	NONGGOT007232.1	96.08	51	2	0	230	280	615	565	1e-16	85.7
XLOC_000467	NONGGOT007232.1	96.08	51	2	0	230	280	615	565	3e-16	85.7
XLOC_000467	NONGGOT007232.1	96.08	51	2	0	230	280	615	565	2e-16	85.7
XLOC_000471	NONGGOT000107.1	100	57	0	0	2603	2659	527	583	4e-24	113
XLOC_000471	NONGGOT000107.1	100	57	0	0	339	395	527	583	8e-25	113
XLOC_000472	NONGGOT001070.1	97.6	125	3	0	462	586	208	84	2e-58	224
XLOC_000473	NONGGOT009770.1	100	23	0	0	2567	2589	226	204	0.0008	46.1
XLOC_000474	NONGGOT005904.1	94.74	38	2	0	1695	1732	90	127	3e-08	60
XLOC_000474	NONGGOT005904.1	94.74	38	2	0	1695	1732	90	127	3e-08	60
XLOC_000475	NONGGOT012452.1	97.37	38	1	0	782	819	1327	1364	6e-11	67.9
XLOC_000477	NONGGOT003205.1	88.12	261	31	0	84	344	463	203	4e-72	272
XLOC_000477	NONGGOT003205.1	88.12	261	31	0	84	344	463	203	5e-72	272
XLOC_000477	NONGGOT003205.1	88.12	261	31	0	84	344	463	203	8e-72	272
XLOC_000483	NONGGOT015362.1	90.39	229	22	0	564	792	814	586	2e-74	280
XLOC_000483	NONGGOT015362.1	90.39	229	22	0	564	792	814	586	2e-74	280
XLOC_000483	NONGGOT015362.1	90.39	229	22	0	564	792	814	586	2e-74	280
XLOC_000483	NONGGOT009264.1	87.98	233	25	1	195	427	542	313	2e-61	236
XLOC_000484	NONGGOT016959.1	100	46	0	0	1	46	79	124	3e-18	91.7
XLOC_000487	NONGGOT000087.1	88.85	269	27	2	43	310	1718	1984	3e-75	281
XLOC_000489	NONGGOT020131.1	100	29	0	0	4	32	3858	3886	3e-08	58
XLOC_000489	NONGGOT020131.1	100	29	0	0	4	32	3858	3886	5e-08	58
XLOC_000489	NONGGOT011958.1	88.33	257	29	1	720	976	6592	6847	1e-69	264
XLOC_000490	NONGGOT008828.1	89.87	79	8	0	474	552	504	426	5e-19	93.7
XLOC_000490	NONGGOT002208.1	86.14	267	33	2	1058	1323	323	60	3e-42	172
XLOC_000491	NONGGOT012492.1	89.58	259	24	2	345	603	332	77	1e-76	285
XLOC_000492	NONGGOT006768.1	96.3	27	1	0	365	391	90	64	0.0005	46.1
XLOC_000494	NONGGOT001111.1	94.55	110	6	0	310	419	369	260	2e-42	170
XLOC_000495	NONGGOT001111.1	95.6	159	7	0	153	311	260	102	5e-69	260
XLOC_000495	NONGGOT001111.1	96.2	158	6	0	1	158	243	86	5e-71	266
XLOC_000496	NONGGOT000150.1	94.55	110	6	0	147	256	251	360	3e-42	170
XLOC_000496	NONGGOT000150.1	95.92	98	4	0	88	185	263	360	6e-40	163
XLOC_000496	NONGGOT000150.1	94.5	109	6	0	81	189	252	360	1e-41	168
XLOC_000506	NONGGOT012492.1	86.67	240	31	1	366	605	306	68	9e-40	163
XLOC_000508	NONGGOT017705.1	88.5	113	13	0	177	289	1865	1753	3e-27	121
XLOC_000509	NONGGOT001147.1	93.87	310	18	1	38	346	310	1	2e-128	456
XLOC_000509	NONGGOT001147.1	93.87	310	18	1	748	1056	310	1	7e-128	456
XLOC_000509	NONGGOT001147.1	93.87	310	18	1	744	1052	310	1	8e-128	456
XLOC_000509	NONGGOT001147.1	93.87	310	18	1	290	598	310	1	5e-128	456
XLOC_000510	NONGGOT001148.1	95.8	143	6	0	556	698	217	75	9e-62	236
XLOC_000510	NONGGOT001148.1	95.8	143	6	0	919	1061	217	75	1e-61	236
XLOC_000510	NONGGOT001148.1	95.8	143	6	0	17	159	217	75	2e-62	236
XLOC_000512	NONGGOT000166.1	94.92	197	10	0	388	584	1156	1352	1e-84	311
XLOC_000512	NONGGOT000166.1	94.92	197	10	0	388	584	1156	1352	2e-84	311
XLOC_000512	NONGGOT000166.1	94.92	197	10	0	388	584	1156	1352	2e-84	311
XLOC_000512	NONGGOT000166.1	94.92	197	10	0	388	584	1156	1352	2e-84	311
XLOC_000512	NONGGOT000166.1	96.91	356	10	1	1	356	801	1155	2e-174	611
XLOC_000513	NONGGOT013856.1	100	39	0	0	170	208	54	16	1e-14	77.8
XLOC_000516	NONGGOT015634.1	93.88	49	3	0	199	247	897	849	3e-12	73.8
XLOC_000516	NONGGOT020660.1	96.49	57	2	0	3182	3238	1408	1352	2e-19	97.6
XLOC_000516	NONGGOT020660.1	96.49	57	2	0	3220	3276	1408	1352	2e-19	97.6
XLOC_000516	NONGGOT020660.1	96.49	57	2	0	2913	2969	1408	1352	2e-19	97.6
XLOC_000518	NONGGOT003270.1	88.89	171	18	1	1583	1752	203	373	1e-44	180
XLOC_000518	NONGGOT013089.1	87.04	54	7	0	168	221	350	297	2e-06	52
XLOC_000518	NONGGOT013332.1	90.48	42	4	0	299	340	3873	3914	2e-06	52
XLOC_000518	NONGGOT013332.1	90.48	42	4	0	299	340	3873	3914	2e-06	52
XLOC_000521	NONGGOT000183.1	100	29	0	0	1255	1283	532	560	8e-08	58
XLOC_000523	NONGGOT000087.1	90.04	261	25	1	4477	4736	1731	1991	3e-81	303
XLOC_000523	NONGGOT007403.1	88.65	282	30	1	975	1254	509	790	3e-80	299
XLOC_000523	NONGGOT007403.1	88.65	282	30	1	975	1254	509	790	4e-80	299
XLOC_000523	NONGGOT007403.1	88.65	282	30	1	975	1254	509	790	4e-80	299
XLOC_000523	NONGGOT007403.1	88.65	282	30	1	975	1254	509	790	3e-80	299
XLOC_000529	NONGGOT018467.1	94.12	119	7	0	30	148	352	470	5e-45	180
XLOC_000529	NONGGOT018467.1	94.12	119	7	0	30	148	352	470	8e-45	180
XLOC_000534	NONGGOT008563.1	94.74	57	3	0	9	65	706	650	3e-17	89.7
XLOC_000539	NONGGOT004734.1	98.21	56	1	0	328	383	569	624	4e-22	103
XLOC_000542	NONGGOT001214.1	96	225	9	0	258	482	225	1	1e-103	375
XLOC_000542	NONGGOT001214.1	95.56	225	10	0	258	482	225	1	3e-101	367
XLOC_000542	NONGGOT001214.1	96	225	9	0	258	482	225	1	1e-103	375
XLOC_000542	NONGGOT001214.1	96	225	9	0	258	482	225	1	9e-104	375
XLOC_000542	NONGGOT001214.1	95.89	219	9	0	258	476	225	7	3e-100	363
XLOC_000542	NONGGOT017700.1	100	21	0	0	91	111	1167	1147	0.0006	42.1
XLOC_000542	NONGGOT016289.1	90.74	54	5	0	278	331	905	958	2e-11	67.9
XLOC_000542	NONGGOT015061.1	91.89	37	3	0	13	49	157	193	5e-06	50.1
XLOC_000544	NONGGOT009150.1	90.12	81	8	0	1	81	743	663	6e-20	97.6
XLOC_000545	NONGGOT017942.1	96.15	26	1	0	258	283	925	950	0.0006	44.1
XLOC_000547	NONGGOT001241.1	95.07	223	9	2	64	284	898	676	3e-93	339
XLOC_000547	NONGGOT001241.1	96.3	324	12	0	798	1121	1660	1337	3e-155	547
XLOC_000547	NONGGOT001241.1	95.48	752	34	0	798	1549	1660	909	0	1221
XLOC_000547	NONGGOT001241.1	94.62	1097	50	5	798	1885	1660	564	0	1675
XLOC_000547	NONGGOT001242.1	95.93	761	24	4	421	1177	758	1	0	1237
XLOC_000547	NONGGOT001242.1	95.61	570	19	3	421	987	758	192	0	914
XLOC_000547	NONGGOT001242.1	95.61	570	19	3	421	987	758	192	0	914
XLOC_000547	NONGGOT001242.1	95.61	570	19	3	421	987	758	192	0	914
XLOC_000547	NONGGOT001242.1	95.61	570	19	3	421	987	758	192	0	914
XLOC_000547	NONGGOT009136.1	96.15	78	3	0	2	79	364	287	6e-30	131
XLOC_000547	NONGGOT009136.1	96.15	78	3	0	2	79	364	287	2e-30	131
XLOC_000549	NONGGOT000269.1	93.33	30	2	0	250	279	336	307	0.0003	44.1
XLOC_000553	NONGGOT008271.1	91.67	36	3	0	224	259	390	425	4e-05	48.1
XLOC_000562	NONGGOT004986.1	89.06	64	7	0	47	110	431	368	9e-13	71.9
XLOC_000564	NONGGOT011657.1	88.57	105	12	0	1838	1942	345	449	3e-24	113
XLOC_000565	NONGGOT014707.1	95.95	74	3	0	9	82	17	90	2e-27	123
XLOC_000565	NONGGOT014707.1	95.95	74	3	0	9	82	17	90	2e-27	123
XLOC_000566	NONGGOT000284.1	97.1	69	1	1	651	718	1	69	8e-25	113
XLOC_000568	NONGGOT001172.1	89.73	224	22	1	37	259	947	1170	4e-67	254
XLOC_000573	NONGGOT000308.1	100	62	0	0	157	218	775	836	4e-27	123
XLOC_000574	NONGGOT001295.1	94.31	281	15	1	952	1231	281	1	4e-105	381
XLOC_000574	NONGGOT001295.1	94.31	281	15	1	297	576	281	1	2e-105	381
XLOC_000574	NONGGOT001295.1	94.56	239	12	1	266	503	281	43	1e-87	321
XLOC_000574	NONGGOT001294.1	92.59	243	17	1	559	801	341	100	4e-90	331
XLOC_000574	NONGGOT001295.1	94.31	281	15	1	649	928	281	1	3e-105	381
XLOC_000574	NONGGOT001295.1	94.31	281	15	1	904	1183	281	1	4e-105	381
XLOC_000574	NONGGOT001295.1	94.31	281	15	1	802	1081	281	1	4e-105	381
XLOC_000574	NONGGOT001295.1	94.31	281	15	1	284	563	281	1	2e-105	381
XLOC_000574	NONGGOT001295.1	94.33	282	15	1	306	586	282	1	5e-106	383
XLOC_000574	NONGGOT016102.1	100	25	0	0	759	783	1844	1868	3e-05	50.1
XLOC_000574	NONGGOT016102.1	100	25	0	0	759	783	1844	1868	3e-05	50.1
XLOC_000574	NONGGOT016102.1	100	25	0	0	759	783	1844	1868	4e-05	50.1
XLOC_000574	NONGGOT001295.1	94.33	282	15	1	2498	2778	282	1	2e-105	383
XLOC_000574	NONGGOT001295.1	94.33	282	15	1	2465	2745	282	1	2e-105	383
XLOC_000574	NONGGOT001295.1	94.31	281	15	1	2213	2492	281	1	8e-105	381
XLOC_000574	NONGGOT001295.1	94.31	281	15	1	2246	2525	281	1	8e-105	381
XLOC_000574	NONGGOT001295.1	94.31	281	15	1	245	524	281	1	2e-105	381
XLOC_000578	NONGGOT011685.1	88.85	269	30	0	750	1018	810	542	3e-79	295
XLOC_000578	NONGGOT011685.1	88.85	269	30	0	750	1018	810	542	2e-79	295
XLOC_000579	NONGGOT001300.1	88.11	244	9	1	1	244	276	53	1e-76	283
XLOC_000580	NONGGOT016620.1	91.67	36	3	0	4	39	434	469	1e-05	48.1
XLOC_000583	NONGGOT020660.1	88	100	12	0	5	104	1630	1729	4e-22	103
XLOC_000587	NONGGOT000785.1	85.33	225	30	2	578	802	628	849	7e-42	170
XLOC_000587	NONGGOT000785.1	85.33	225	30	2	578	802	628	849	7e-42	170
XLOC_000587	NONGGOT000785.1	85.33	225	30	2	578	802	628	849	8e-42	170
XLOC_000587	NONGGOT000785.1	85.33	225	30	2	578	802	628	849	8e-42	170
XLOC_000587	NONGGOT000785.1	85.33	225	30	2	578	802	628	849	8e-42	170
XLOC_000588	NONGGOT012392.1	88.36	275	29	2	929	1203	1938	2209	1e-73	278
XLOC_000588	NONGGOT020437.1	89.71	272	27	1	3147	3417	1950	1679	3e-83	309
XLOC_000592	NONGGOT001321.1	94.71	208	10	1	137	343	417	210	3e-86	317
XLOC_000592	NONGGOT001321.1	94.71	208	10	1	137	343	417	210	1e-86	317
XLOC_000592	NONGGOT001322.1	91.32	311	23	2	344	650	454	144	3e-108	391
XLOC_000592	NONGGOT001321.1	94.71	208	10	1	137	343	417	210	2e-86	317
XLOC_000592	NONGGOT001321.1	94.71	208	10	1	117	323	417	210	2e-86	317
XLOC_000592	NONGGOT001321.1	94.71	208	10	1	50	256	417	210	1e-86	317
XLOC_000592	NONGGOT019571.1	84.58	253	25	3	1	252	179	418	6e-36	151
XLOC_000592	NONGGOT001322.1	91.32	311	23	2	379	685	454	144	3e-108	391
XLOC_000595	NONGGOT000345.1	95.38	195	9	0	58	252	1667	1861	9e-86	315
XLOC_000595	NONGGOT000345.1	95.38	195	9	0	128	322	1668	1862	5e-86	315
XLOC_000595	NONGGOT000345.1	95.36	194	9	0	128	321	1668	1861	4e-85	313
XLOC_000595	NONGGOT000345.1	94.97	199	10	0	206	404	1663	1861	1e-85	315
XLOC_000595	NONGGOT000345.1	95.9	536	21	1	1	536	1327	1861	0	839
XLOC_000598	NONGGOT011941.1	89.54	239	25	0	606	844	604	842	2e-73	276
XLOC_000601	NONGGOT004759.1	91.15	113	10	0	1927	2039	875	763	1e-33	145
XLOC_000603	NONGGOT001357.1	95.17	145	5	1	604	746	836	692	1e-58	226
XLOC_000603	NONGGOT001357.1	95.17	145	5	1	812	954	836	692	1e-58	226
XLOC_000603	NONGGOT001357.1	95.17	145	5	1	604	746	836	692	1e-58	226
XLOC_000603	NONGGOT001357.1	95.17	145	5	1	812	954	836	692	2e-58	226
XLOC_000603	NONGGOT001357.1	95.27	148	5	1	598	743	839	692	2e-60	232
XLOC_000603	NONGGOT001357.1	95.17	145	5	1	63	205	836	692	9e-59	226
XLOC_000603	NONGGOT001131.1	89.22	167	16	1	1	165	240	74	9e-46	182
XLOC_000608	NONGGOT001367.1	95.45	44	2	0	644	687	105	62	3e-12	71.9
XLOC_000609	NONGGOT017474.1	85.04	274	35	2	536	805	809	538	3e-31	137
XLOC_000609	NONGGOT017474.1	85.04	274	35	2	536	805	809	538	3e-31	137
XLOC_000612	NONGGOT011182.1	90.04	542	50	1	71	612	1298	761	0	644
XLOC_000612	NONGGOT011182.1	90.04	542	50	1	71	612	1298	761	0	644
XLOC_000612	NONGGOT011182.1	90.04	542	50	1	71	612	1298	761	0	644
XLOC_000612	NONGGOT011182.1	90.04	542	50	1	71	612	1298	761	0	644
XLOC_000613	NONGGOT006784.1	85	80	12	0	304	383	731	652	6e-10	63.9
XLOC_000614	NONGGOT004806.1	98	50	1	0	1	50	1126	1175	1e-18	91.7
XLOC_000621	NONGGOT000517.1	88.37	43	5	0	29	71	404	446	0.0003	46.1
XLOC_000621	NONGGOT000517.1	88.37	43	5	0	29	71	404	446	0.0003	46.1
XLOC_000621	NONGGOT000517.1	88.37	43	5	0	29	71	404	446	0.0002	46.1
XLOC_000624	NONGGOT020660.1	91.89	37	3	0	676	712	348	384	1e-05	50.1
XLOC_000624	NONGGOT020660.1	89.66	87	9	0	611	697	348	434	3e-21	101
XLOC_000624	NONGGOT010603.1	86.13	238	31	1	710	947	43	278	1e-39	163
XLOC_000624	NONGGOT020660.1	90.11	91	9	0	297	387	348	438	7e-24	109
XLOC_000626	NONGGOT020487.1	85.57	201	28	1	132	332	804	1003	4e-39	161
XLOC_000628	NONGGOT020099.1	96.25	80	3	0	3	82	1016	1095	4e-31	135
XLOC_000628	NONGGOT001396.1	93.93	214	13	0	605	818	597	384	2e-87	321
XLOC_000628	NONGGOT020099.1	96.25	80	3	0	3	82	1016	1095	2e-31	135
XLOC_000628	NONGGOT001396.1	94.38	178	10	0	1	178	561	384	2e-73	274
XLOC_000628	NONGGOT001396.1	94.38	178	10	0	1	178	561	384	4e-73	274
XLOC_000628	NONGGOT001396.1	95.39	152	7	0	1	152	561	410	8e-65	246
XLOC_000631	NONGGOT018631.1	96.43	28	1	0	1	28	85	112	5e-05	48.1
XLOC_000631	NONGGOT018631.1	96.43	28	1	0	1	28	85	112	6e-05	48.1
XLOC_000632	NONGGOT012492.1	87.17	265	33	1	3541	3804	320	56	2e-64	248
XLOC_000634	NONGGOT001410.1	95.01	361	17	1	332	691	1090	730	1e-146	517
XLOC_000635	NONGGOT001410.1	94.93	138	5	1	123	258	377	240	4e-55	212
XLOC_000636	NONGGOT000087.1	92.79	111	7	1	650	759	1739	1849	2e-35	149
XLOC_000636	NONGGOT000087.1	92.79	111	7	1	900	1009	1739	1849	2e-35	149
XLOC_000636	NONGGOT007403.1	86.67	270	26	3	633	901	775	515	6e-54	210
XLOC_000636	NONGGOT007403.1	86.67	270	26	3	649	917	775	515	7e-54	210
XLOC_000636	NONGGOT007403.1	86.67	270	26	3	1034	1302	775	515	9e-54	210
XLOC_000643	NONGGOT001476.1	93.81	113	6	1	69	180	148	260	2e-39	161
XLOC_000646	NONGGOT020740.1	100	51	0	0	4	54	3568	3618	2e-21	101
XLOC_000648	NONGGOT000479.1	96.63	89	3	0	290	378	2603	2691	5e-37	153
XLOC_000648	NONGGOT000479.1	96.67	90	3	0	294	383	2603	2692	1e-37	155
XLOC_000648	NONGGOT000479.1	96.63	89	3	0	208	296	2603	2691	4e-37	153
XLOC_000650	NONGGOT020627.1	93.75	32	2	0	68	99	559	528	5e-05	48.1
XLOC_000650	NONGGOT012939.1	96.55	29	1	0	522	550	218	246	1e-05	50.1
XLOC_000651	NONGGOT016299.1	94.53	128	7	0	211	338	521	648	8e-51	198
XLOC_000655	NONGGOT001491.1	96.46	226	6	1	358	581	592	367	2e-92	337
XLOC_000655	NONGGOT001491.1	96.3	216	6	1	358	571	592	377	2e-86	317
XLOC_000656	NONGGOT001945.1	88.5	226	25	1	1020	1245	2998	3222	1e-60	234
XLOC_000657	NONGGOT010227.1	93.1	58	4	0	383	440	767	824	7e-16	83.8
XLOC_000658	NONGGOT009264.1	89.26	270	24	2	308	577	587	323	2e-79	295
XLOC_000661	NONGGOT008404.1	85.86	99	14	0	36	134	880	978	1e-16	85.7
XLOC_000663	NONGGOT009336.1	97.44	39	1	0	1	39	519	481	4e-12	69.9
XLOC_000664	NONGGOT001072.1	100	25	0	0	164	188	41	17	3e-06	50.1
XLOC_000672	NONGGOT018053.1	90.48	42	4	0	13	54	303	262	1e-06	52
XLOC_000674	NONGGOT010781.1	97.14	35	1	0	518	552	57	23	2e-09	61.9
XLOC_000675	NONGGOT014978.1	83.33	78	13	0	113	190	37	114	1e-06	52
XLOC_000676	NONGGOT015099.1	86.86	137	17	1	1597	1732	452	316	1e-26	121
XLOC_000676	NONGGOT015099.1	86.86	137	17	1	1597	1732	452	316	1e-26	121
XLOC_000676	NONGGOT017571.1	84.83	211	28	1	2191	2397	2141	2351	6e-39	163
XLOC_000677	NONGGOT020752.1	90	50	5	0	573	622	149	100	9e-09	60
XLOC_000679	NONGGOT001585.1	91.7	253	20	1	735	987	990	1241	8e-89	327
XLOC_000680	NONGGOT015655.1	87.5	128	16	0	444	571	450	577	1e-28	127
XLOC_000680	NONGGOT015655.1	87.5	128	16	0	444	571	450	577	1e-28	127
XLOC_000680	NONGGOT015655.1	87.5	128	16	0	444	571	450	577	1e-28	127
XLOC_000682	NONGGOT006341.1	96.3	27	1	0	761	787	374	400	0.0002	46.1
XLOC_000689	NONGGOT003650.1	88.4	250	29	0	11	260	493	244	9e-71	266
XLOC_000690	NONGGOT018375.1	93.22	59	2	2	180	236	157	99	4e-11	69.9
XLOC_000694	NONGGOT019390.1	100	24	0	0	159	182	525	548	2e-05	48.1
XLOC_000695	NONGGOT003782.1	100	28	0	0	76	103	59	86	8e-08	56
XLOC_000696	NONGGOT000728.1	91.81	757	47	5	39	793	744	1	0	989
XLOC_000696	NONGGOT000728.1	93.19	279	15	1	497	771	387	109	2e-111	400
XLOC_000696	NONGGOT000728.1	91.98	823	48	5	282	1099	810	1	0	1094
XLOC_000696	NONGGOT000728.1	92.35	823	48	5	282	1102	810	1	0	1112
XLOC_000697	NONGGOT016040.1	89.25	214	23	0	564	777	2174	2387	3e-63	242
XLOC_000697	NONGGOT001643.1	94.79	211	11	0	1198	1408	401	191	4e-90	331
XLOC_000698	NONGGOT000723.1	95.27	148	7	0	1	148	175	28	2e-62	238
XLOC_000699	NONGGOT009262.1	87.78	90	11	0	161	250	1	90	2e-18	91.7
XLOC_000699	NONGGOT009262.1	87.78	90	11	0	161	250	1	90	2e-18	91.7
XLOC_000699	NONGGOT009262.1	87.78	90	11	0	161	250	1	90	4e-18	91.7
XLOC_000702	NONGGOT006292.1	89.13	230	25	0	258	487	2	231	4e-68	258
XLOC_000705	NONGGOT002205.1	92.55	94	7	0	76	169	1048	955	3e-30	131
XLOC_000707	NONGGOT000713.1	93.15	248	13	1	238	481	323	76	8e-98	355
XLOC_000707	NONGGOT000713.1	93.4	288	15	1	233	516	323	36	7e-117	418
XLOC_000707	NONGGOT000713.1	93.09	362	21	1	436	793	379	18	2e-146	517
XLOC_000710	NONGGOT004269.1	97.96	49	1	0	728	776	2872	2824	1e-17	89.7
XLOC_000711	NONGGOT014908.1	88.98	118	13	0	193	310	387	270	3e-30	131
XLOC_000711	NONGGOT014908.1	88.98	118	13	0	193	310	387	270	4e-30	131
XLOC_000716	NONGGOT006758.1	92.5	120	9	0	331	450	2110	1991	1e-40	167
XLOC_000716	NONGGOT006758.1	92.5	120	9	0	331	450	2110	1991	1e-40	167
XLOC_000722	NONGGOT010231.1	79.34	513	88	7	4666	5172	3272	3772	7e-33	143
XLOC_000724	NONGGOT000689.1	94.29	333	19	0	1	333	333	1	1e-143	509
XLOC_000724	NONGGOT012099.1	100	26	0	0	3	28	166	141	5e-06	52
XLOC_000725	NONGGOT003606.1	94.41	161	8	1	92	251	4272	4112	3e-63	240
XLOC_000726	NONGGOT000688.1	90.2	51	2	1	590	640	104	57	4e-08	58
XLOC_000727	NONGGOT016299.1	92.57	175	13	0	72	246	722	548	2e-64	244
XLOC_000729	NONGGOT000686.1	95.88	437	17	1	172	608	436	1	0	716
XLOC_000729	NONGGOT000686.1	92.94	85	5	1	412	496	84	1	7e-25	113
XLOC_000731	NONGGOT000684.1	91.24	217	12	2	1	214	797	585	1e-73	274
XLOC_000746	NONGGOT004793.1	82.52	143	21	2	343	483	509	369	9e-13	73.8
XLOC_000748	NONGGOT000642.1	93.67	221	12	1	2	220	320	100	5e-88	321
XLOC_000749	NONGGOT000641.1	95.43	197	7	2	109	304	279	84	3e-82	303
XLOC_000750	NONGGOT000636.1	95.5	289	12	1	1	289	426	139	6e-130	462
XLOC_000751	NONGGOT010428.1	84.62	65	10	0	219	283	861	797	6e-06	50.1
XLOC_000756	NONGGOT017322.1	89.77	88	9	0	46	133	224	311	2e-22	103
XLOC_000759	NONGGOT001225.1	86.21	116	16	0	556	671	269	154	4e-21	103
XLOC_000760	NONGGOT013165.1	86.38	213	28	1	982	1194	525	314	8e-46	184
XLOC_000761	NONGGOT008817.1	91.43	35	3	0	211	245	165	131	0.0002	46.1
XLOC_000761	NONGGOT001551.1	93.1	145	10	0	173	317	520	376	9e-54	208
XLOC_000765	NONGGOT000621.1	93.94	33	2	0	583	615	1	33	9e-06	50.1
XLOC_000769	NONGGOT013812.1	94.55	55	3	0	51	105	564	510	1e-16	85.7
XLOC_000769	NONGGOT013812.1	94.55	55	3	0	51	105	564	510	1e-16	85.7
XLOC_000777	NONGGOT008270.1	89.11	101	11	0	2007	2107	517	617	2e-24	113
XLOC_000778	NONGGOT014745.1	90.79	76	6	1	143	217	192	267	1e-16	87.7
XLOC_000778	NONGGOT004446.1	79.02	305	64	0	11	315	4298	3994	6e-20	97.6
XLOC_000778	NONGGOT004446.1	79.02	305	64	0	11	315	4298	3994	1e-19	97.6
XLOC_000779	NONGGOT004384.1	82.89	228	34	2	47	274	2065	1843	7e-31	133
XLOC_000779	NONGGOT004384.1	82.89	228	34	2	47	274	2065	1843	8e-31	133
XLOC_000786	NONGGOT014985.1	89.22	102	10	1	25	125	136	35	4e-23	107
XLOC_000793	NONGGOT008051.1	85.54	83	12	0	112	194	2667	2585	3e-12	69.9
XLOC_000794	NONGGOT016357.1	91.49	141	11	1	26	165	1284	1144	3e-44	176
XLOC_000796	NONGGOT016378.1	87.12	264	33	1	68	331	355	93	6e-65	246
XLOC_000796	NONGGOT016378.1	87.12	264	33	1	68	331	355	93	7e-65	246
XLOC_000797	NONGGOT020437.1	90.36	280	27	0	2901	3180	1958	1679	1e-92	341
XLOC_000797	NONGGOT020437.1	90.36	280	27	0	2901	3180	1958	1679	2e-92	341
XLOC_000800	NONGGOT001799.1	90.48	42	4	0	793	834	271	312	1e-05	52
XLOC_000802	NONGGOT011883.1	87.41	135	17	0	109	243	71	205	9e-31	133
XLOC_000804	NONGGOT001782.1	100	104	0	0	1193	1296	274	377	3e-52	206
XLOC_000805	NONGGOT009009.1	93.44	122	8	0	1930	2051	2029	1908	5e-44	178
XLOC_000806	NONGGOT017322.1	92.68	41	3	0	266	306	570	530	8e-08	58
XLOC_000806	NONGGOT017322.1	92.68	41	3	0	266	306	570	530	9e-08	58
XLOC_000806	NONGGOT017322.1	92.68	41	3	0	266	306	570	530	9e-08	58
XLOC_000806	NONGGOT017322.1	92.68	41	3	0	266	306	570	530	1e-07	58
XLOC_000807	NONGGOT009754.1	88.89	270	30	0	1687	1956	1597	1866	2e-79	297
XLOC_000808	NONGGOT007403.1	84.87	271	31	2	1953	2214	521	790	7e-54	212
XLOC_000813	NONGGOT004881.1	91.78	73	6	0	206	278	1335	1407	2e-20	97.6
XLOC_000814	NONGGOT017066.1	100	24	0	0	449	472	223	246	6e-05	48.1
XLOC_000815	NONGGOT001759.1	94.94	158	8	0	474	631	3011	3168	5e-66	250
XLOC_000817	NONGGOT018108.1	84.34	83	13	0	137	219	198	116	3e-09	61.9
XLOC_000818	NONGGOT019921.1	89.19	148	15	1	226	372	927	1074	7e-39	159
XLOC_000822	NONGGOT006130.1	88.79	116	13	0	2468	2583	377	262	2e-28	127
XLOC_000825	NONGGOT017617.1	98.04	51	1	0	6	56	476	526	2e-18	93.7
XLOC_000826	NONGGOT011048.1	89.66	87	7	1	960	1044	782	696	5e-19	95.6
XLOC_000830	NONGGOT010603.1	87.35	253	29	1	828	1077	263	11	5e-64	244
XLOC_000830	NONGGOT009264.1	90	230	17	2	2636	2865	326	549	5e-70	266
XLOC_000830	NONGGOT002691.1	93.06	72	5	0	278	349	2035	2106	3e-21	103
XLOC_000830	NONGGOT009264.1	90	230	17	2	1615	1844	326	549	4e-70	266
XLOC_000830	NONGGOT009264.1	90	230	17	2	834	1063	326	549	3e-70	266
XLOC_000831	NONGGOT016040.1	87.45	263	32	1	1576	1838	2441	2180	3e-66	252
XLOC_000835	NONGGOT002386.1	88.76	267	30	0	1419	1685	757	491	4e-78	291
XLOC_000837	NONGGOT013236.1	91.78	73	6	0	9	81	320	248	2e-20	97.6
XLOC_000837	NONGGOT003432.1	95.24	42	2	0	92	133	1273	1232	8e-11	67.9
XLOC_000843	NONGGOT005978.1	91.3	46	4	0	1553	1598	3880	3835	2e-08	60
XLOC_000847	NONGGOT009872.1	90.87	219	12	1	106	316	201	419	7e-76	281
XLOC_000848	NONGGOT008911.1	100	22	0	0	177	198	902	881	0.0006	44.1
XLOC_000851	NONGGOT009854.1	91.87	332	22	2	25	354	215	543	1e-121	434
XLOC_000853	NONGGOT006283.1	94.29	70	4	0	1	70	15	84	2e-23	107
XLOC_000858	NONGGOT014589.1	90.35	228	20	2	3300	3525	599	826	1e-68	262
XLOC_000858	NONGGOT014589.1	90.35	228	20	2	2823	3048	599	826	9e-69	262
XLOC_000858	NONGGOT014589.1	90.35	228	20	2	3639	3864	599	826	1e-68	262
XLOC_000858	NONGGOT016299.1	91.51	271	21	1	9869	10139	789	521	3e-86	321
XLOC_000858	NONGGOT017561.1	91.26	103	9	0	1351	1453	946	844	2e-30	133
XLOC_000858	NONGGOT017561.1	91.26	103	9	0	1774	1876	946	844	2e-30	133
XLOC_000859	NONGGOT010314.1	88.52	244	27	1	3549	3792	517	759	4e-66	254
XLOC_000862	NONGGOT009509.1	95.83	48	1	1	236	283	685	639	1e-12	71.9
XLOC_000862	NONGGOT007920.1	90.7	43	4	0	409	451	262	220	4e-07	54
XLOC_000866	NONGGOT006049.1	87.66	154	10	2	2691	2835	261	414	5e-36	153
XLOC_000866	NONGGOT006049.1	87.66	154	10	2	2674	2818	261	414	5e-36	153
XLOC_000867	NONGGOT017857.1	83.62	116	13	2	100	213	965	1076	3e-12	71.9
XLOC_000868	NONGGOT019161.1	92.31	104	7	1	112	214	386	283	4e-31	135
XLOC_000868	NONGGOT019121.1	91.78	219	18	0	1381	1599	783	1001	3e-78	291
XLOC_000869	NONGGOT017643.1	96.15	26	1	0	462	487	56	81	0.0005	44.1
XLOC_000870	NONGGOT005186.1	85.05	408	39	2	546	950	1080	1468	2e-95	349
XLOC_000870	NONGGOT005186.1	85.05	408	39	2	523	927	1080	1468	2e-95	349
XLOC_000871	NONGGOT017509.1	88.33	60	7	0	136	195	113	54	2e-09	63.9
XLOC_000879	NONGGOT007694.1	95.03	322	10	2	851	1172	9	324	4e-142	504
XLOC_000881	NONGGOT018693.1	88.76	249	26	1	408	656	965	719	1e-61	236
XLOC_000882	NONGGOT020369.1	97.37	38	1	0	1	38	94	57	7e-11	67.9
XLOC_000885	NONGGOT005414.1	94.74	38	2	0	1259	1296	257	294	2e-08	60
XLOC_000886	NONGGOT000907.1	84.92	484	60	4	1525	1999	292	771	1e-100	367
XLOC_000886	NONGGOT000907.1	84.92	484	60	4	1523	1997	292	771	1e-100	367
XLOC_000887	NONGGOT009608.1	95.39	1063	45	3	527	1586	1409	348	0	1697
XLOC_000888	NONGGOT009609.1	92.29	402	30	1	105	506	874	474	2e-154	543
XLOC_000889	NONGGOT016299.1	90.48	252	21	1	881	1132	769	521	3e-67	256
XLOC_000890	NONGGOT003236.1	90.7	86	8	0	8	93	243	328	6e-23	107
XLOC_000890	NONGGOT003236.1	92.21	77	6	0	3	79	252	328	1e-22	105
XLOC_000890	NONGGOT011048.1	91.53	59	5	0	1	59	1668	1726	2e-14	77.8
XLOC_000890	NONGGOT013553.1	89.84	246	25	0	476	721	605	850	2e-77	289
XLOC_000890	NONGGOT009016.1	91.23	57	5	0	352	408	1041	1097	4e-13	73.8
XLOC_000890	NONGGOT014986.1	100	21	0	0	167	187	238	258	0.0007	42.1
XLOC_000890	NONGGOT003936.1	96.43	28	1	0	561	588	1	28	4e-05	48.1
XLOC_000890	NONGGOT003936.1	96.43	28	1	0	585	612	1	28	4e-05	48.1
XLOC_000891	NONGGOT010090.1	88.89	90	10	0	309	398	38	127	8e-21	99.6
XLOC_000893	NONGGOT009813.1	100	35	0	0	867	901	717	751	2e-11	69.9
XLOC_000893	NONGGOT016083.1	86.96	46	6	0	23	68	1973	1928	0.001	44.1
XLOC_000893	NONGGOT009813.1	100	35	0	0	546	580	717	751	1e-11	69.9
XLOC_000893	NONGGOT012392.1	86.92	260	30	3	1542	1798	1940	2198	2e-57	224
XLOC_000893	NONGGOT012392.1	86.92	260	30	3	1777	2033	1940	2198	2e-57	224
XLOC_000893	NONGGOT012392.1	86.92	260	30	3	1698	1954	1940	2198	2e-57	224
XLOC_000893	NONGGOT012392.1	86.92	260	30	3	1693	1949	1940	2198	2e-57	224
XLOC_000893	NONGGOT012392.1	86.92	260	30	3	1385	1641	1940	2198	2e-57	224
XLOC_000893	NONGGOT009185.1	90.91	33	3	0	228	260	37	5	0.0009	42.1
XLOC_000893	NONGGOT012392.1	86.92	260	30	3	1652	1908	1940	2198	2e-57	224
XLOC_000893	NONGGOT012392.1	86.92	260	30	3	1554	1810	1940	2198	2e-57	224
XLOC_000893	NONGGOT012392.1	86.92	260	30	3	1636	1892	1940	2198	2e-57	224
XLOC_000893	NONGGOT012392.1	86.92	260	30	3	1626	1882	1940	2198	2e-57	224
XLOC_000893	NONGGOT012392.1	86.92	260	30	3	1531	1787	1940	2198	2e-57	224
XLOC_000893	NONGGOT012392.1	86.92	260	30	3	1535	1791	1940	2198	2e-57	224
XLOC_000893	NONGGOT012392.1	86.92	260	30	3	1165	1421	1940	2198	2e-57	224
XLOC_000893	NONGGOT012392.1	86.92	260	30	3	847	1103	1940	2198	1e-57	224
XLOC_000894	NONGGOT005364.1	87.93	58	7	0	425	482	1535	1592	7e-09	60
XLOC_000895	NONGGOT008431.1	91.6	119	10	0	801	919	349	231	9e-38	157
XLOC_000895	NONGGOT008431.1	91.6	119	10	0	596	714	349	231	7e-38	157
XLOC_000896	NONGGOT016755.1	84.31	102	16	0	375	476	210	109	1e-13	75.8
XLOC_000898	NONGGOT009607.1	87.72	57	7	0	961	1017	296	352	7e-08	58
XLOC_000898	NONGGOT009607.1	87.72	57	7	0	564	620	296	352	5e-08	58
XLOC_000898	NONGGOT009607.1	87.72	57	7	0	550	606	296	352	5e-08	58
XLOC_000900	NONGGOT007902.1	86.57	283	27	1	997	1268	136	418	2e-45	182
XLOC_000900	NONGGOT007902.1	86.57	283	27	1	726	997	136	418	1e-45	182
XLOC_000904	NONGGOT000329.1	88.93	262	29	0	548	809	1612	1351	2e-77	289
XLOC_000907	NONGGOT009377.1	93.57	140	5	3	28	164	1	139	9e-47	184
XLOC_000908	NONGGOT000852.1	90.2	51	5	0	536	586	580	530	2e-09	61.9
XLOC_000909	NONGGOT005554.1	100	30	0	0	305	334	319	290	1e-08	60
XLOC_000909	NONGGOT005554.1	100	30	0	0	305	334	319	290	1e-08	60
XLOC_000915	NONGGOT002041.1	90.91	44	3	1	18	60	155	112	7e-05	48.1
XLOC_000917	NONGGOT010925.1	88.37	43	5	0	267	309	290	332	0.0001	46.1
XLOC_000917	NONGGOT008503.1	91.43	35	3	0	325	359	154	120	0.0001	46.1
XLOC_000917	NONGGOT010925.1	88.37	43	5	0	861	903	290	332	0.0003	46.1
XLOC_000917	NONGGOT010925.1	88.37	43	5	0	195	237	290	332	0.0002	46.1
XLOC_000917	NONGGOT014133.1	84.62	65	10	0	1041	1105	682	746	2e-05	50.1
XLOC_000919	NONGGOT009405.1	91.8	1390	94	8	62	1434	43	1429	0	1788
XLOC_000920	NONGGOT009408.1	95.56	135	6	0	1	135	94	228	6e-57	220
XLOC_000920	NONGGOT009408.1	96.88	128	4	0	84	211	360	487	1e-57	222
XLOC_000920	NONGGOT009408.1	96.88	128	4	0	62	189	360	487	1e-57	222
XLOC_000920	NONGGOT009408.1	96.88	128	4	0	14	141	360	487	1e-57	222
XLOC_000921	NONGGOT000140.1	92.86	70	3	2	515	582	863	932	6e-16	83.8
XLOC_000922	NONGGOT016659.1	93.62	47	1	1	137	181	1643	1597	2e-10	63.9
XLOC_000922	NONGGOT010374.1	85.56	277	31	6	978	1251	771	501	8e-48	190
XLOC_000922	NONGGOT018725.1	87.1	62	8	0	281	342	1047	1108	3e-08	60
XLOC_000922	NONGGOT018725.1	87.1	62	8	0	189	250	1047	1108	3e-08	60
XLOC_000926	NONGGOT019161.1	87.55	249	27	3	181	427	501	255	1e-58	226
XLOC_000926	NONGGOT019161.1	86.64	277	33	3	380	654	529	255	3e-61	234
XLOC_000928	NONGGOT016474.1	86.96	69	9	0	388	456	84	16	1e-10	65.9
XLOC_000929	NONGGOT019675.1	89	100	9	1	124	223	158	61	1e-22	105
XLOC_000930	NONGGOT009444.1	89.61	77	8	0	143	219	372	448	3e-18	89.7
XLOC_000931	NONGGOT005770.1	100	22	0	0	402	423	227	248	0.0007	44.1
XLOC_000936	NONGGOT017607.1	96.05	76	3	0	856	931	1159	1084	7e-29	127
XLOC_000936	NONGGOT017607.1	96.05	76	3	0	886	961	1159	1084	7e-29	127
XLOC_000936	NONGGOT017607.1	96.05	76	3	0	653	728	1159	1084	5e-29	127
XLOC_000936	NONGGOT018411.1	92.92	212	6	3	1108	1310	1659	1448	1e-77	289
XLOC_000936	NONGGOT017607.1	96.05	76	3	0	1697	1772	1159	1084	1e-28	127
XLOC_000938	NONGGOT010456.1	96.56	262	4	1	251	512	1226	970	3e-113	406
XLOC_000939	NONGGOT009264.1	89	100	11	0	438	537	313	412	2e-24	111
XLOC_000939	NONGGOT009264.1	89	100	11	0	335	434	313	412	2e-24	111
XLOC_000941	NONGGOT013751.1	86.92	107	10	1	64	170	50	152	2e-20	99.6
XLOC_000941	NONGGOT015213.1	94.74	38	2	0	9	46	67	30	1e-08	60
XLOC_000942	NONGGOT003482.1	92.16	51	4	0	405	455	1060	1010	1e-11	69.9
XLOC_000942	NONGGOT003482.1	92.16	51	4	0	495	545	1060	1010	1e-11	69.9
XLOC_000944	NONGGOT009266.1	85.29	102	15	0	271	372	441	340	7e-16	83.8
XLOC_000944	NONGGOT018273.1	88	75	9	0	518	592	482	408	5e-14	77.8
XLOC_000944	NONGGOT009266.1	85.29	102	15	0	367	468	441	340	8e-16	83.8
XLOC_000945	NONGGOT007520.1	92.63	190	14	0	429	618	1017	828	1e-60	232
XLOC_000947	NONGGOT003652.1	89.57	230	17	3	954	1179	481	255	8e-57	220
XLOC_000949	NONGGOT006698.1	97.3	37	1	0	264	300	2389	2353	1e-10	65.9
XLOC_000950	NONGGOT007902.1	98.1	105	2	0	1284	1388	141	245	2e-48	192
XLOC_000950	NONGGOT007902.1	98.1	105	2	0	1489	1593	141	245	2e-48	192
XLOC_000951	NONGGOT003236.1	88.66	97	11	0	308	404	337	241	4e-22	105
XLOC_000954	NONGGOT010459.1	94.17	103	6	0	5	107	141	243	3e-38	157
XLOC_000958	NONGGOT016299.1	93.68	269	16	1	3849	4116	789	521	2e-107	391
XLOC_000960	NONGGOT019018.1	96.77	31	1	0	4	34	1148	1118	2e-07	54
XLOC_000962	NONGGOT020382.1	86.57	216	29	0	321	536	257	42	1e-50	198
XLOC_000963	NONGGOT010251.1	84.51	71	10	1	98	168	103	172	6e-05	46.1
XLOC_000963	NONGGOT010251.1	84.51	71	10	1	67	137	103	172	5e-05	46.1
XLOC_000964	NONGGOT010499.1	100	60	0	0	365	424	629	570	8e-27	119
XLOC_000965	NONGGOT017715.1	100	38	0	0	1	38	204	241	1e-13	75.8
XLOC_000968	NONGGOT000234.1	90.48	42	4	0	753	794	987	1028	4e-06	52
XLOC_000969	NONGGOT016299.1	95.08	264	13	0	11901	12164	526	789	5e-116	420
XLOC_000969	NONGGOT016299.1	95.08	264	13	0	12033	12296	526	789	5e-116	420
XLOC_000969	NONGGOT016299.1	95.08	264	13	0	11824	12087	526	789	5e-116	420
XLOC_000970	NONGGOT003959.1	100	21	0	0	40	60	814	794	0.0007	42.1
XLOC_000971	NONGGOT009508.1	91.89	74	5	1	745	818	788	860	6e-18	91.7
XLOC_000974	NONGGOT012885.1	83.61	122	20	0	574	695	848	969	8e-16	83.8
XLOC_000974	NONGGOT012885.1	83.61	122	20	0	743	864	848	969	1e-15	83.8
XLOC_000974	NONGGOT012885.1	83.61	122	20	0	599	720	848	969	9e-16	83.8
XLOC_000974	NONGGOT012885.1	83.61	122	20	0	714	835	848	969	1e-15	83.8
XLOC_000974	NONGGOT019701.1	91.11	45	4	0	688	732	2001	2045	5e-08	58
XLOC_000974	NONGGOT012885.1	83.61	122	20	0	615	736	848	969	9e-16	83.8
XLOC_000975	NONGGOT004465.1	89.58	48	4	1	1776	1823	6	52	0.0002	48.1
XLOC_000977	NONGGOT018478.1	93.33	30	2	0	186	215	2196	2167	0.0003	44.1
XLOC_000977	NONGGOT018478.1	93.33	30	2	0	168	197	2196	2167	0.0002	44.1
XLOC_000977	NONGGOT018478.1	93.33	30	2	0	84	113	2196	2167	0.0002	44.1
XLOC_000977	NONGGOT012084.1	92.31	65	5	0	98	162	1699	1763	1e-17	89.7
XLOC_000981	NONGGOT019598.1	97.67	43	1	0	184	226	66	24	1e-14	77.8
XLOC_000989	NONGGOT012492.1	87.06	170	21	1	916	1085	145	313	4e-37	155
XLOC_000990	NONGGOT015961.1	93.2	147	10	0	833	979	125	271	2e-54	212
XLOC_000990	NONGGOT015961.1	91.71	181	15	0	1034	1214	125	305	1e-62	240
XLOC_000992	NONGGOT007215.1	89.58	96	10	0	788	883	1259	1164	6e-24	111
XLOC_000992	NONGGOT001901.1	88.64	273	31	0	563	835	631	359	2e-79	295
XLOC_000992	NONGGOT007215.1	89.58	96	10	0	731	826	1259	1164	5e-24	111
XLOC_000992	NONGGOT001901.1	88.64	273	31	0	389	661	631	359	2e-79	295
XLOC_000992	NONGGOT001901.1	88.64	273	31	0	282	554	631	359	2e-79	295
XLOC_000994	NONGGOT017630.1	100	24	0	0	204	227	400	377	2e-05	48.1
XLOC_000994	NONGGOT014304.1	97.5	40	1	0	1	40	1111	1072	1e-12	71.9
XLOC_000994	NONGGOT017630.1	100	24	0	0	291	314	400	377	2e-05	48.1
XLOC_000995	NONGGOT001945.1	88	225	27	0	90	314	2998	3222	7e-61	232
XLOC_000996	NONGGOT001156.1	87.91	91	11	0	2	92	408	318	2e-18	93.7
XLOC_001001	NONGGOT020163.1	86.89	267	30	3	1139	1402	2935	3199	7e-60	232
XLOC_001001	NONGGOT020163.1	86.89	267	30	3	1517	1780	2935	3199	8e-60	232
XLOC_001002	NONGGOT013369.1	87.16	109	14	0	475	583	516	408	5e-22	105
XLOC_001003	NONGGOT015501.1	97.83	46	1	0	2	47	797	752	3e-15	83.8
XLOC_001004	NONGGOT017615.1	85.85	106	15	0	41	146	574	679	1e-18	91.7
XLOC_001005	NONGGOT019161.1	87.06	255	33	0	7	261	276	530	7e-64	244
XLOC_001006	NONGGOT000163.1	87.75	253	27	3	878	1129	451	700	1e-60	234
XLOC_001008	NONGGOT003021.1	100	28	0	0	84	111	235	208	1e-07	56
XLOC_001016	NONGGOT009451.1	86.42	162	21	1	441	602	2459	2299	1e-32	139
XLOC_001020	NONGGOT015363.1	86.75	166	19	1	896	1061	393	555	6e-36	151
XLOC_001020	NONGGOT010424.1	92	75	5	1	257	330	1	75	9e-19	93.7
XLOC_001020	NONGGOT015363.1	86.75	166	19	1	877	1042	393	555	6e-36	151
XLOC_001021	NONGGOT014166.1	96.43	28	1	0	81	108	1170	1143	6e-05	48.1
XLOC_001021	NONGGOT009142.1	100	33	0	0	950	982	926	894	3e-10	65.9
XLOC_001021	NONGGOT009142.1	100	33	0	0	1154	1186	926	894	4e-10	65.9
XLOC_001021	NONGGOT009142.1	100	33	0	0	1379	1411	926	894	4e-10	65.9
XLOC_001021	NONGGOT010426.1	91.36	162	13	1	2496	2656	39	200	5e-51	202
XLOC_001021	NONGGOT009142.1	100	33	0	0	1396	1428	926	894	4e-10	65.9
XLOC_001021	NONGGOT010426.1	91.36	162	13	1	2513	2673	39	200	5e-51	202
XLOC_001021	NONGGOT010426.1	91.25	160	13	1	2665	2823	41	200	8e-50	198
XLOC_001021	NONGGOT010426.1	91.25	160	13	1	2435	2593	41	200	7e-50	198
XLOC_001021	NONGGOT010426.1	91.25	160	13	1	2584	2742	41	200	7e-50	198
XLOC_001021	NONGGOT010426.1	91.25	160	13	1	2356	2514	41	200	7e-50	198
XLOC_001021	NONGGOT020153.1	93.48	46	3	0	88	133	411	456	1e-10	67.9
XLOC_001021	NONGGOT010426.1	91.36	162	13	1	2855	3015	39	200	5e-51	202
XLOC_001021	NONGGOT010426.1	91.36	162	13	1	1703	1863	39	200	3e-51	202
XLOC_001021	NONGGOT010426.1	91.36	162	13	1	1916	2076	39	200	4e-51	202
XLOC_001021	NONGGOT010426.1	91.25	160	13	1	2150	2308	41	200	6e-50	198
XLOC_001021	NONGGOT010426.1	91.19	159	13	1	733	890	42	200	1e-49	196
XLOC_001021	NONGGOT010426.1	91.19	159	13	1	712	869	42	200	1e-49	196
XLOC_001023	NONGGOT020697.1	97.14	35	1	0	208	242	1057	1023	2e-09	61.9
XLOC_001024	NONGGOT016299.1	95.56	270	12	0	153	422	788	519	5e-123	440
XLOC_001025	NONGGOT012823.1	96	25	1	0	65	89	473	497	0.0009	42.1
XLOC_001027	NONGGOT000536.1	93.94	33	2	0	790	822	484	452	2e-05	50.1
XLOC_001027	NONGGOT013823.1	92.31	65	5	0	825	889	172	108	2e-17	89.7
XLOC_001027	NONGGOT013823.1	92.31	65	5	0	1733	1797	172	108	3e-17	89.7
XLOC_001027	NONGGOT001700.1	91.18	34	3	0	429	462	1914	1881	0.0005	44.1
XLOC_001027	NONGGOT012492.1	87.55	273	32	1	1055	1327	68	338	3e-60	232
XLOC_001027	NONGGOT010256.1	95.56	90	4	0	27	116	375	286	6e-35	147
XLOC_001027	NONGGOT010256.1	95.56	90	4	0	27	116	375	286	6e-35	147
XLOC_001027	NONGGOT010256.1	95.56	90	4	0	27	116	375	286	8e-35	147
XLOC_001027	NONGGOT013823.1	92.31	65	5	0	905	969	172	108	2e-17	89.7
XLOC_001027	NONGGOT013823.1	92.31	65	5	0	966	1030	172	108	2e-17	89.7
XLOC_001028	NONGGOT010431.1	90.28	72	7	0	112	183	114	185	2e-17	87.7
XLOC_001030	NONGGOT019152.1	94.2	69	4	0	323	391	117	49	3e-22	105
XLOC_001030	NONGGOT019152.1	94.2	69	4	0	424	492	117	49	3e-22	105
XLOC_001032	NONGGOT009314.1	85.91	298	42	0	991	1288	2757	2460	5e-68	258
XLOC_001034	NONGGOT014990.1	90.22	92	9	0	1234	1325	1315	1224	9e-24	111
XLOC_001034	NONGGOT014990.1	90.22	92	9	0	1173	1264	1315	1224	9e-24	111
XLOC_001034	NONGGOT014990.1	90.22	92	9	0	939	1030	1315	1224	8e-24	111
XLOC_001034	NONGGOT014990.1	90.22	92	9	0	1885	1976	1315	1224	1e-23	111
XLOC_001034	NONGGOT014990.1	90.22	92	9	0	945	1036	1315	1224	8e-24	111
XLOC_001035	NONGGOT012677.1	90.41	271	26	0	1727	1997	368	638	6e-90	331
XLOC_001036	NONGGOT010690.1	93.33	30	2	0	954	983	100	71	0.0009	44.1
XLOC_001036	NONGGOT010690.1	93.33	30	2	0	678	707	100	71	0.0006	44.1
XLOC_001037	NONGGOT003528.1	96.77	31	1	0	1414	1444	246	276	3e-06	54
XLOC_001038	NONGGOT003447.1	97.48	119	3	0	411	529	79	197	9e-55	212
XLOC_001040	NONGGOT016475.1	87.38	103	13	0	69	171	474	576	1e-21	101
XLOC_001041	NONGGOT009123.1	92.11	38	3	0	723	760	460	423	3e-06	52
XLOC_001041	NONGGOT008928.1	92.42	66	3	1	701	764	429	364	2e-16	85.7
XLOC_001041	NONGGOT011590.1	88.1	42	5	0	285	326	115	74	0.0005	44.1
XLOC_001041	NONGGOT008928.1	92.42	66	3	1	449	512	429	364	2e-16	85.7
XLOC_001041	NONGGOT011590.1	87.8	41	5	0	44	84	114	74	0.001	42.1
XLOC_001043	NONGGOT009009.1	90.15	132	12	1	559	689	1773	1904	3e-36	151
XLOC_001050	NONGGOT013657.1	90.32	93	9	0	189	281	1349	1441	1e-24	113
XLOC_001051	NONGGOT011048.1	89.66	87	7	1	352	436	782	696	3e-19	95.6
XLOC_001056	NONGGOT009584.1	95.96	198	8	0	1	198	1121	924	9e-90	329
XLOC_001058	NONGGOT017857.1	96.15	26	1	0	460	485	1058	1083	0.0005	44.1
XLOC_001062	NONGGOT012035.1	87.76	98	12	0	347	444	4379	4282	8e-21	99.6
XLOC_001066	NONGGOT009896.1	93.02	43	3	0	226	268	1	43	1e-09	61.9
XLOC_001067	NONGGOT009563.1	94.96	119	5	1	253	371	248	131	3e-45	180
XLOC_001072	NONGGOT010603.1	89.84	246	25	0	2652	2897	252	7	3e-77	289
XLOC_001074	NONGGOT012737.1	96.15	26	1	0	96	121	461	436	0.0005	44.1
XLOC_001075	NONGGOT009873.1	97.87	94	2	0	123	216	89	182	1e-42	170
XLOC_001077	NONGGOT011992.1	93.33	45	3	0	256	300	244	200	2e-10	65.9
XLOC_001077	NONGGOT011992.1	93.33	45	3	0	256	300	244	200	3e-10	65.9
XLOC_001080	NONGGOT009537.1	95.87	218	8	1	447	664	281	65	7e-97	353
XLOC_001080	NONGGOT009537.1	95.87	218	8	1	447	664	281	65	8e-97	353
XLOC_001084	NONGGOT017647.1	100	22	0	0	19	40	372	351	0.0002	44.1
XLOC_001085	NONGGOT012470.1	86.08	79	10	1	7	84	763	685	1e-09	61.9
XLOC_001085	NONGGOT019066.1	87.6	121	15	0	77	197	412	292	3e-27	121
XLOC_001085	NONGGOT019066.1	87.6	121	15	0	77	197	412	292	3e-27	121
XLOC_001086	NONGGOT010982.1	85.16	128	14	1	74	196	26	153	5e-22	103
XLOC_001087	NONGGOT001771.1	87.38	103	13	0	46	148	1089	987	7e-21	101
XLOC_001087	NONGGOT001771.1	87.38	103	13	0	46	148	1089	987	9e-21	101
XLOC_001087	NONGGOT001771.1	87.38	103	13	0	46	148	1089	987	9e-21	101
XLOC_001087	NONGGOT001771.1	87.38	103	13	0	46	148	1089	987	8e-21	101
XLOC_001087	NONGGOT019571.1	92.5	80	6	0	2	81	257	178	2e-24	111
XLOC_001089	NONGGOT010211.1	87.14	241	29	1	1339	1579	101	339	2e-49	196
XLOC_001089	NONGGOT010211.1	87.14	241	29	1	1339	1579	101	339	3e-49	196
XLOC_001089	NONGGOT010211.1	87.14	241	29	1	1339	1579	101	339	3e-49	196
XLOC_001089	NONGGOT002092.1	87.97	133	16	0	475	607	1923	2055	6e-32	137
XLOC_001089	NONGGOT002092.1	87.97	133	16	0	475	607	1923	2055	9e-32	137
XLOC_001089	NONGGOT002092.1	87.97	133	16	0	475	607	1923	2055	9e-32	137
XLOC_001089	NONGGOT002820.1	100	23	0	0	731	753	1811	1789	0.0003	46.1
XLOC_001089	NONGGOT000709.1	96.97	33	1	0	1371	1403	915	947	8e-08	58
XLOC_001089	NONGGOT000709.1	96.97	33	1	0	1264	1296	915	947	1e-07	58
XLOC_001089	NONGGOT002820.1	100	23	0	0	404	426	1811	1789	0.0002	46.1
XLOC_001090	NONGGOT016299.1	90.32	155	15	0	549	703	520	674	2e-47	188
XLOC_001091	NONGGOT012627.1	96.3	27	1	0	1651	1677	5326	5300	0.0004	46.1
XLOC_001091	NONGGOT018033.1	96.15	26	1	0	39	64	3460	3485	0.0005	44.1
XLOC_001094	NONGGOT003323.1	88.57	70	8	0	517	586	216	285	9e-13	75.8
XLOC_001094	NONGGOT003323.1	88.57	70	8	0	517	586	216	285	9e-13	75.8
XLOC_001094	NONGGOT003323.1	88.57	70	8	0	517	586	216	285	8e-13	75.8
XLOC_001095	NONGGOT013088.1	91.67	36	3	0	80	115	204	169	3e-05	48.1
XLOC_001098	NONGGOT007830.1	90.54	148	14	0	4935	5082	567	420	7e-45	182
XLOC_001098	NONGGOT016299.1	89.84	246	24	1	5694	5939	522	766	7e-67	256
XLOC_001100	NONGGOT010950.1	100	25	0	0	3	27	148	124	5e-06	50.1
XLOC_001107	NONGGOT003760.1	85.63	334	45	3	100	431	1103	1435	1e-68	258
XLOC_001108	NONGGOT009607.1	95.79	190	8	0	106	295	277	88	3e-85	313
XLOC_001108	NONGGOT009607.1	95.81	191	8	0	106	296	277	87	8e-86	315
XLOC_001114	NONGGOT009623.1	98.44	64	1	0	186	249	268	205	4e-27	119
XLOC_001114	NONGGOT009813.1	96.15	26	1	0	17	42	657	682	0.0002	44.1
XLOC_001115	NONGGOT013819.1	96.3	27	1	0	37	63	150	124	0.0002	46.1
XLOC_001117	NONGGOT014589.1	87.78	180	18	1	1	176	724	545	2e-45	180
XLOC_001122	NONGGOT009632.1	90.45	335	21	2	725	1056	690	364	9e-115	412
XLOC_001122	NONGGOT009632.1	90.36	332	21	2	725	1053	690	367	6e-113	406
XLOC_001124	NONGGOT015975.1	96.67	30	1	0	284	313	205	176	3e-06	52
XLOC_001124	NONGGOT015975.1	96.67	30	1	0	284	313	205	176	3e-06	52
XLOC_001128	NONGGOT004731.1	86.21	58	8	0	623	680	835	892	2e-06	52
XLOC_001128	NONGGOT009683.1	96.59	88	3	0	1050	1137	318	231	6e-36	151
XLOC_001128	NONGGOT009683.1	96.59	88	3	0	701	788	318	231	4e-36	151
XLOC_001128	NONGGOT009683.1	90.67	150	14	0	64	213	478	329	7e-47	186
XLOC_001128	NONGGOT009683.1	96.59	88	3	0	420	507	318	231	4e-36	151
XLOC_001129	NONGGOT009685.1	95.12	82	4	0	833	914	1116	1035	4e-30	131
XLOC_001130	NONGGOT009685.1	92.53	870	60	4	5	872	868	2	0	1096
XLOC_001130	NONGGOT009685.1	92.54	871	60	4	5	873	868	1	0	1098
XLOC_001130	NONGGOT009685.1	92.52	869	60	4	5	871	868	3	0	1094
XLOC_001130	NONGGOT008954.1	87.18	78	10	0	218	295	837	914	8e-14	75.8
XLOC_001130	NONGGOT005412.1	81.87	342	52	5	349	687	1239	905	9e-38	157
XLOC_001135	NONGGOT009704.1	94.74	304	14	2	268	570	542	240	3e-129	460
XLOC_001136	NONGGOT012878.1	88.64	44	5	0	415	458	958	1001	9e-05	48.1
XLOC_001136	NONGGOT012878.1	88.64	44	5	0	415	458	958	1001	9e-05	48.1
XLOC_001141	NONGGOT009738.1	90.53	169	13	1	246	414	248	83	2e-52	204
XLOC_001141	NONGGOT009738.1	90.44	251	21	1	319	569	248	1	3e-82	303
XLOC_001147	NONGGOT020004.1	94.42	197	11	0	1795	1991	702	506	4e-81	303
XLOC_001147	NONGGOT020004.1	94.42	197	11	0	1795	1991	702	506	4e-81	303
XLOC_001147	NONGGOT020004.1	94.42	197	11	0	1795	1991	702	506	4e-81	303
XLOC_001147	NONGGOT020004.1	94.42	197	11	0	1795	1991	702	506	4e-81	303
XLOC_001150	NONGGOT001564.1	89.94	179	17	1	77	255	4444	4267	2e-52	204
XLOC_001151	NONGGOT020163.1	88.07	243	29	0	2236	2478	4080	4322	6e-66	252
XLOC_001152	NONGGOT009314.1	88.45	277	31	1	796	1072	2475	2750	5e-66	252
XLOC_001154	NONGGOT010463.1	92.12	203	12	1	792	990	384	182	5e-73	274
XLOC_001155	NONGGOT018111.1	81.85	270	44	3	4	268	1557	1288	5e-29	127
XLOC_001155	NONGGOT010459.1	90.76	119	11	0	903	1021	243	125	2e-35	149
XLOC_001155	NONGGOT020740.1	87.91	273	31	2	334	605	2036	1765	5e-70	264
XLOC_001160	NONGGOT013734.1	85.71	105	15	0	1125	1229	4521	4625	3e-17	89.7
XLOC_001161	NONGGOT000706.1	89.11	202	19	2	4135	4335	2945	3144	8e-54	212
XLOC_001163	NONGGOT010250.1	95.87	315	13	0	102	416	315	1	3e-147	521
XLOC_001163	NONGGOT010250.1	95.87	315	13	0	102	416	315	1	3e-147	521
XLOC_001163	NONGGOT010250.1	95.87	315	13	0	102	416	315	1	3e-147	521
XLOC_001163	NONGGOT006698.1	95.24	42	2	0	252	293	2394	2353	4e-11	67.9
XLOC_001166	NONGGOT017607.1	97.3	74	2	0	1	74	1085	1158	3e-30	131
XLOC_001166	NONGGOT017607.1	97.3	74	2	0	1	74	1085	1158	5e-30	131
XLOC_001167	NONGGOT013698.1	83.47	236	36	1	43	275	695	930	2e-37	155
XLOC_001168	NONGGOT010274.1	90	240	18	2	3	239	237	1	3e-74	278
XLOC_001168	NONGGOT010274.1	90	240	18	2	3	239	237	1	3e-74	278
XLOC_001168	NONGGOT010274.1	90	240	18	2	3	239	237	1	4e-74	278
XLOC_001168	NONGGOT010274.1	90	240	18	2	3	239	237	1	5e-74	278
XLOC_001168	NONGGOT010274.1	90	240	18	2	3	239	237	1	5e-74	278
XLOC_001171	NONGGOT010485.1	92.59	54	4	0	22	75	281	228	9e-14	75.8
XLOC_001172	NONGGOT010486.1	89.04	73	8	0	124	196	258	186	2e-15	81.8
XLOC_001172	NONGGOT010486.1	85.45	110	15	1	300	408	258	149	5e-16	83.8
XLOC_001172	NONGGOT010486.1	85.45	110	15	1	300	408	258	149	7e-16	83.8
XLOC_001172	NONGGOT010486.1	85.45	110	15	1	300	408	258	149	9e-16	83.8
XLOC_001172	NONGGOT010486.1	89.04	73	8	0	5	77	258	186	9e-16	81.8
XLOC_001172	NONGGOT002762.1	86.81	235	23	1	7	241	3943	4169	4e-48	190
XLOC_001174	NONGGOT003809.1	100	25	0	0	811	835	210	186	1e-05	50.1
XLOC_001176	NONGGOT018467.1	100	28	0	0	654	681	471	444	1e-07	56
XLOC_001177	NONGGOT015197.1	86.5	163	13	1	527	680	1237	1075	5e-38	157
XLOC_001179	NONGGOT014412.1	91.23	57	5	0	17	73	579	523	7e-13	73.8
XLOC_001179	NONGGOT014412.1	91.23	57	5	0	17	73	579	523	7e-13	73.8
XLOC_001179	NONGGOT014412.1	91.23	57	5	0	17	73	579	523	4e-13	73.8
XLOC_001181	NONGGOT010503.1	95.18	83	4	0	490	572	237	155	7e-31	133
XLOC_001183	NONGGOT015661.1	93.55	31	2	0	70	100	213	243	6e-05	46.1
XLOC_001185	NONGGOT003826.1	90.7	43	4	0	261	303	1614	1572	3e-07	54
XLOC_001186	NONGGOT011657.1	90.16	122	11	1	534	654	466	345	1e-32	139
XLOC_001188	NONGGOT019571.1	100	25	0	0	1	25	176	152	4e-06	50.1
XLOC_001189	NONGGOT010227.1	85.99	157	16	2	2	155	825	672	1e-29	129
XLOC_001193	NONGGOT005578.1	89.11	257	26	2	917	1171	593	337	4e-72	272
XLOC_001193	NONGGOT005578.1	89.11	257	26	2	917	1171	593	337	5e-72	272
XLOC_001194	NONGGOT009126.1	96.55	29	1	0	354	382	1024	996	5e-06	50.1
XLOC_001197	NONGGOT008867.1	93.88	49	3	0	678	726	1164	1212	7e-13	73.8
XLOC_001198	NONGGOT010533.1	89.01	455	16	5	13	462	820	395	2e-148	523
XLOC_001198	NONGGOT010533.1	89.01	455	16	5	13	462	820	395	2e-148	523
XLOC_001199	NONGGOT010541.1	86.84	76	6	1	1166	1237	110	35	2e-11	69.9
XLOC_001199	NONGGOT010541.1	86.84	76	6	1	277	348	110	35	1e-11	69.9
XLOC_001199	NONGGOT010541.1	86.84	76	6	1	277	348	110	35	7e-12	69.9
XLOC_001199	NONGGOT010542.1	92.4	263	19	1	187	449	262	1	1e-97	355
XLOC_001199	NONGGOT010542.1	92.4	263	19	1	433	695	262	1	2e-97	355
XLOC_001199	NONGGOT010541.1	86.84	76	6	1	128	199	110	35	5e-12	69.9
XLOC_001200	NONGGOT009047.1	84.5	200	31	0	222	421	520	719	2e-36	151
XLOC_001200	NONGGOT009047.1	84.5	200	31	0	222	421	520	719	3e-36	151
XLOC_001202	NONGGOT018086.1	88.97	136	15	0	2	137	400	265	3e-36	151
XLOC_001203	NONGGOT018631.1	90.7	43	3	1	77	119	71	112	9e-05	46.1
XLOC_001205	NONGGOT011021.1	91.84	196	13	1	407	602	236	44	2e-68	258
XLOC_001207	NONGGOT000328.1	90.37	218	21	0	729	946	2284	2501	1e-69	266
XLOC_001207	NONGGOT000328.1	90.37	218	21	0	729	946	2284	2501	1e-69	266
XLOC_001207	NONGGOT000328.1	90.37	218	21	0	729	946	2284	2501	1e-69	266
XLOC_001207	NONGGOT000328.1	90.37	218	21	0	729	946	2284	2501	1e-69	266
XLOC_001207	NONGGOT000328.1	90.37	218	21	0	729	946	2284	2501	1e-69	266
XLOC_001207	NONGGOT000328.1	90.37	218	21	0	729	946	2284	2501	1e-69	266
XLOC_001207	NONGGOT000328.1	90.37	218	21	0	729	946	2284	2501	1e-69	266
XLOC_001207	NONGGOT000328.1	90.37	218	21	0	729	946	2284	2501	1e-69	266
XLOC_001208	NONGGOT008822.1	100	25	0	0	1740	1764	149	173	2e-05	50.1
XLOC_001208	NONGGOT008822.1	100	25	0	0	427	451	149	173	9e-06	50.1
XLOC_001214	NONGGOT015100.1	91.75	97	8	0	40	136	4050	4146	2e-29	129
XLOC_001216	NONGGOT018255.1	87.96	274	30	2	783	1054	1709	1437	8e-71	268
XLOC_001216	NONGGOT018255.1	87.96	274	30	2	783	1054	1709	1437	8e-71	268
XLOC_001217	NONGGOT014859.1	90.57	212	17	2	757	968	30	238	1e-64	248
XLOC_001217	NONGGOT014859.1	90.57	212	17	2	757	968	30	238	9e-65	248
XLOC_001217	NONGGOT016299.1	90.18	275	21	1	1253	1527	521	789	3e-90	333
XLOC_001217	NONGGOT016299.1	90.18	275	21	1	1253	1527	521	789	2e-90	333
XLOC_001218	NONGGOT011323.1	88.75	160	18	0	75	234	1628	1469	1e-43	174
XLOC_001220	NONGGOT010579.1	100	169	0	0	219	387	1726	1558	9e-92	335
XLOC_001220	NONGGOT010579.1	93.91	542	33	0	497	1038	558	17	0	741
XLOC_001220	NONGGOT010579.1	100	168	0	0	219	386	1726	1559	5e-91	333
XLOC_001220	NONGGOT010579.1	97.43	584	12	3	219	800	1726	1144	0	973
XLOC_001220	NONGGOT010579.1	93.29	417	24	2	3	415	999	583	3e-169	593
XLOC_001234	NONGGOT001225.1	88.99	109	12	0	180	288	160	268	4e-27	121
XLOC_001236	NONGGOT010434.1	93.59	952	52	3	266	1217	1124	2066	0	1392
XLOC_001237	NONGGOT010434.1	89.47	38	4	0	1	38	2293	2330	0.0003	44.1
XLOC_001237	NONGGOT010434.1	96.55	29	1	0	6	34	2390	2418	4e-06	50.1
XLOC_001238	NONGGOT010575.1	88.87	467	40	6	809	1265	1	465	8e-134	478
XLOC_001239	NONGGOT012726.1	86.27	51	7	0	66	116	5543	5593	5e-05	46.1
XLOC_001240	NONGGOT010620.1	87.14	140	18	0	901	1040	294	155	4e-31	135
XLOC_001240	NONGGOT010620.1	87.5	144	18	0	117	260	298	155	3e-34	143
XLOC_001243	NONGGOT000496.1	94.23	52	3	0	1	52	83	32	1e-14	79.8
XLOC_001243	NONGGOT000618.1	91.67	72	6	0	833	904	1754	1825	2e-19	95.6
XLOC_002085	NONGGOT004861.1	87.4	254	24	3	3503	3749	1039	1291	7e-61	236
XLOC_002088	NONGGOT001131.1	91.96	112	9	0	39	150	199	88	3e-36	151
XLOC_002089	NONGGOT003910.1	97.3	37	1	0	1600	1636	1231	1267	4e-10	65.9
XLOC_002089	NONGGOT003910.1	97.3	37	1	0	983	1019	1231	1267	2e-10	65.9
XLOC_002089	NONGGOT003910.1	97.3	37	1	0	948	984	1231	1267	2e-10	65.9
XLOC_002089	NONGGOT003910.1	97.3	37	1	0	1127	1163	1231	1267	3e-10	65.9
XLOC_002089	NONGGOT003910.1	97.3	37	1	0	961	997	1231	1267	2e-10	65.9
XLOC_002092	NONGGOT004392.1	95.38	65	3	0	1	65	77	13	6e-22	105
XLOC_002093	NONGGOT003918.1	98.25	171	3	0	56	226	1	171	4e-86	315
XLOC_002095	NONGGOT004257.1	91.43	35	3	0	967	1001	1305	1271	0.0004	46.1
XLOC_002099	NONGGOT019411.1	87.2	125	15	1	334	458	7030	7153	2e-24	113
XLOC_002099	NONGGOT020364.1	94.29	35	2	0	1	35	1210	1244	2e-06	54
XLOC_002100	NONGGOT011050.1	90.08	131	11	2	412	541	3511	3640	3e-33	141
XLOC_002101	NONGGOT013406.1	89.29	56	4	1	242	297	94	41	3e-08	58
XLOC_002102	NONGGOT007517.1	85.19	81	12	0	199	279	711	631	6e-11	65.9
XLOC_002103	NONGGOT000140.1	86.89	122	6	2	1	112	854	733	7e-26	115
XLOC_002104	NONGGOT010874.1	100	27	0	0	7	33	82	56	6e-07	54
XLOC_002106	NONGGOT008410.1	93.28	119	8	0	1842	1960	528	410	5e-42	172
XLOC_002108	NONGGOT016378.1	84.29	210	33	0	210	419	150	359	2e-37	155
XLOC_002110	NONGGOT004424.1	94.44	36	2	0	1	36	312	277	1e-07	56
XLOC_002112	NONGGOT005444.1	88.55	131	15	0	757	887	306	436	9e-33	141
XLOC_002118	NONGGOT004535.1	88.89	63	7	0	24	86	634	572	7e-12	69.9
XLOC_002119	NONGGOT020697.1	89.8	49	5	0	176	224	1333	1381	1e-08	58
XLOC_002122	NONGGOT003999.1	97.22	324	9	0	136	459	143	466	9e-163	571
XLOC_002124	NONGGOT005584.1	93.1	29	2	0	106	134	920	892	0.0007	42.1
XLOC_002125	NONGGOT004011.1	100	23	0	0	395	417	254	276	0.0001	46.1
XLOC_002125	NONGGOT004011.1	100	23	0	0	395	417	254	276	0.0001	46.1
XLOC_002125	NONGGOT004452.1	95.74	94	4	0	847	940	94	1	6e-37	155
XLOC_002125	NONGGOT004452.1	95.74	94	4	0	825	918	94	1	6e-37	155
XLOC_002126	NONGGOT009339.1	95	60	3	0	533	592	1770	1711	2e-19	95.6
XLOC_002127	NONGGOT005444.1	93.33	90	6	0	1049	1138	347	436	6e-30	131
XLOC_002127	NONGGOT005444.1	93.33	90	6	0	554	643	347	436	3e-30	131
XLOC_002130	NONGGOT020589.1	96.67	30	1	0	133	162	197	168	1e-06	52
XLOC_002130	NONGGOT020589.1	96.67	30	1	0	684	713	197	168	3e-06	52
XLOC_002130	NONGGOT020589.1	96.67	30	1	0	114	143	197	168	1e-06	52
XLOC_002130	NONGGOT020589.1	96.67	30	1	0	276	305	197	168	2e-06	52
XLOC_002131	NONGGOT016330.1	90.15	457	40	2	147	599	931	1386	3e-153	539
XLOC_002132	NONGGOT020740.1	97.44	39	1	0	1	39	3583	3621	5e-12	69.9
XLOC_002137	NONGGOT001585.1	88.79	223	24	1	4375	4597	1235	1014	7e-61	236
XLOC_002137	NONGGOT001585.1	88.79	223	24	1	4390	4612	1235	1014	7e-61	236
XLOC_002137	NONGGOT001585.1	88.79	223	24	1	3284	3506	1235	1014	6e-61	236
XLOC_002137	NONGGOT018690.1	90.72	97	9	0	222	318	2477	2573	9e-27	121
XLOC_002137	NONGGOT003652.1	88.64	132	15	0	10	141	383	252	1e-33	143
XLOC_002139	NONGGOT002691.1	93.48	46	3	0	331	376	2025	2070	2e-11	67.9
XLOC_002144	NONGGOT003236.1	90.38	52	5	0	308	359	620	569	4e-10	63.9
XLOC_002145	NONGGOT002208.1	87.72	114	14	0	361	474	167	54	1e-25	115
XLOC_002147	NONGGOT014565.1	96.67	30	1	0	390	419	995	1024	1e-06	52
XLOC_002147	NONGGOT014565.1	96.67	30	1	0	426	455	995	1024	2e-06	52
XLOC_002147	NONGGOT014565.1	96.67	30	1	0	369	398	995	1024	1e-06	52
XLOC_002152	NONGGOT016299.1	91.88	271	20	2	3021	3290	790	521	4e-86	319
XLOC_002152	NONGGOT020394.1	100	24	0	0	3015	3038	733	710	0.0002	48.1
XLOC_002154	NONGGOT004071.1	95.58	113	5	0	165	277	219	331	1e-46	184
XLOC_002156	NONGGOT004073.1	93.86	114	6	1	6	118	418	531	1e-39	163
XLOC_002158	NONGGOT004082.1	94.9	431	22	0	105	535	1	431	0	680
XLOC_002158	NONGGOT004082.1	94.9	431	22	0	160	590	1	431	0	680
XLOC_002159	NONGGOT016299.1	89.71	272	28	0	679	950	789	518	5e-86	317
XLOC_002159	NONGGOT016299.1	89.71	272	28	0	192	463	789	518	4e-86	317
XLOC_002161	NONGGOT010472.1	96.3	27	1	0	121	147	281	255	0.0003	46.1
XLOC_002165	NONGGOT017607.1	94.32	88	4	1	918	1004	1158	1071	7e-29	127
XLOC_002166	NONGGOT013981.1	87.71	236	22	2	889	1118	2126	2360	2e-60	232
XLOC_002166	NONGGOT013981.1	87.71	236	22	2	724	953	2126	2360	2e-60	232
XLOC_002166	NONGGOT004517.1	94.53	750	33	3	843	1584	1826	1077	0	1148
XLOC_002167	NONGGOT004428.1	92.8	125	9	0	1	125	653	529	7e-44	176
XLOC_002169	NONGGOT020359.1	90.12	81	8	0	1	81	1932	1852	2e-20	97.6
XLOC_002173	NONGGOT012099.1	97.06	34	1	0	386	419	141	174	8e-09	60
XLOC_002173	NONGGOT010558.1	88.37	172	20	0	3	174	2389	2218	1e-45	182
XLOC_002184	NONGGOT005645.1	89.13	46	5	0	187	232	894	939	1e-06	52
XLOC_002185	NONGGOT018113.1	94.12	34	2	0	341	374	503	536	5e-06	52
XLOC_002186	NONGGOT018231.1	86.89	183	24	0	587	769	278	96	1e-42	172
XLOC_002188	NONGGOT011450.1	93.33	60	4	0	2250	2309	664	723	2e-16	87.7
XLOC_002190	NONGGOT016360.1	86.89	61	8	0	715	775	413	473	4e-08	58
XLOC_002191	NONGGOT009504.1	90.83	120	11	0	419	538	201	82	4e-36	151
XLOC_002201	NONGGOT010297.1	83.49	218	25	1	513	730	3258	3052	2e-38	159
XLOC_002205	NONGGOT013481.1	90.38	530	47	3	898	1425	116	643	3e-178	624
XLOC_002205	NONGGOT013481.1	90.38	530	47	3	745	1272	116	643	3e-178	624
XLOC_002205	NONGGOT013481.1	91.2	648	50	4	382	1027	1	643	0	807
XLOC_002205	NONGGOT013481.1	90.38	530	47	3	668	1195	116	643	3e-178	624
XLOC_002205	NONGGOT013481.1	90.38	530	47	3	616	1143	116	643	3e-178	624
XLOC_002205	NONGGOT013481.1	91.2	648	50	4	229	874	1	643	0	807
XLOC_002205	NONGGOT013481.1	90.38	530	47	3	616	1143	116	643	3e-178	624
XLOC_002205	NONGGOT013481.1	91.2	648	50	4	257	902	1	643	0	807
XLOC_002208	NONGGOT019051.1	90.24	41	4	0	396	436	44	4	6e-06	50.1
XLOC_002208	NONGGOT019051.1	90.24	41	4	0	1464	1504	44	4	2e-05	50.1
XLOC_002214	NONGGOT009776.1	96.88	32	1	0	273	304	960	929	2e-07	56
XLOC_002214	NONGGOT011121.1	84.91	212	31	1	517	727	606	395	1e-38	159
XLOC_002216	NONGGOT020382.1	88.68	106	12	0	1	106	4	109	5e-25	115
XLOC_002220	NONGGOT002484.1	89.25	93	10	0	324	416	99	191	3e-22	105
XLOC_002220	NONGGOT002484.1	89.25	93	10	0	326	418	99	191	3e-22	105
XLOC_002226	NONGGOT016299.1	91.82	269	17	1	704	967	789	521	1e-98	359
XLOC_002230	NONGGOT017323.1	81.84	468	80	3	285	747	592	125	1e-60	234
XLOC_002230	NONGGOT017323.1	81.84	468	80	3	255	717	592	125	1e-60	234
XLOC_002231	NONGGOT012483.1	100	22	0	0	2	23	299	278	0.001	44.1
XLOC_002232	NONGGOT016818.1	100	53	0	0	490	542	694	746	1e-22	105
XLOC_002234	NONGGOT003667.1	96.97	33	1	0	432	464	392	424	5e-08	58
XLOC_002240	NONGGOT000556.1	91.11	90	7	1	109	198	514	602	4e-23	107
XLOC_002244	NONGGOT010211.1	88.73	275	29	2	8572	8845	330	57	5e-75	283
XLOC_002244	NONGGOT020686.1	89.45	957	90	5	626	1574	2025	2978	0	1035
XLOC_002246	NONGGOT001084.1	85.08	181	24	1	176	353	3128	2948	2e-33	141
XLOC_002250	NONGGOT005809.1	89.23	260	20	2	1044	1297	737	480	2e-77	289
XLOC_002253	NONGGOT017302.1	100	24	0	0	987	1010	642	665	0.0002	48.1
XLOC_002253	NONGGOT017682.1	100	23	0	0	2506	2528	869	891	0.0006	46.1
XLOC_002253	NONGGOT017682.1	100	23	0	0	2453	2475	869	891	0.0006	46.1
XLOC_002254	NONGGOT019572.1	92.31	52	4	0	23	74	872	821	2e-12	71.9
XLOC_002257	NONGGOT004735.1	96.99	166	5	0	285	450	868	703	6e-68	256
XLOC_002258	NONGGOT016285.1	89.01	191	19	2	1	190	556	367	5e-50	196
XLOC_002259	NONGGOT004254.1	98.15	162	3	0	118	279	206	367	9e-81	297
XLOC_002259	NONGGOT004254.1	98.15	162	3	0	75	236	206	367	8e-81	297
XLOC_002261	NONGGOT010374.1	85.82	282	40	0	910	1191	775	494	4e-63	242
XLOC_002263	NONGGOT009767.1	88.56	236	26	1	1622	1856	3092	2857	3e-64	246
XLOC_002264	NONGGOT001117.1	93.14	102	7	0	95	196	286	185	7e-35	147
XLOC_002266	NONGGOT005544.1	84.56	259	36	2	876	1133	2230	1975	7e-46	184
XLOC_002267	NONGGOT004273.1	93.42	228	13	2	1	227	159	385	8e-87	317
XLOC_002268	NONGGOT015173.1	94.62	93	5	0	1134	1226	551	459	9e-34	145
XLOC_002270	NONGGOT016471.1	91.04	67	6	0	396	462	59	125	1e-16	85.7
XLOC_002272	NONGGOT008965.1	90.57	212	20	0	89	300	672	461	5e-69	262
XLOC_002272	NONGGOT004284.1	95.68	139	6	0	63	201	14	152	5e-60	228
XLOC_002272	NONGGOT020660.1	100	23	0	0	1782	1804	1776	1754	0.0005	46.1
XLOC_002272	NONGGOT020660.1	100	23	0	0	1799	1821	1776	1754	0.0005	46.1
XLOC_002272	NONGGOT004284.1	94.5	291	15	1	57	346	14	304	3e-123	442
XLOC_002272	NONGGOT004284.1	94.5	291	15	1	57	346	14	304	1e-123	442
XLOC_002272	NONGGOT020660.1	100	23	0	0	1798	1820	1776	1754	0.0005	46.1
XLOC_002272	NONGGOT020660.1	100	23	0	0	1586	1608	1776	1754	0.0004	46.1
XLOC_002272	NONGGOT020660.1	100	23	0	0	1592	1614	1776	1754	0.0004	46.1
XLOC_002273	NONGGOT013806.1	96.15	26	1	0	166	191	1	26	0.0005	44.1
XLOC_002274	NONGGOT000108.1	92.5	40	2	1	193	231	1302	1341	2e-05	48.1
XLOC_002276	NONGGOT012152.1	90.91	143	13	0	7	149	944	802	2e-45	180
XLOC_002277	NONGGOT020660.1	92.52	107	8	0	160	266	1718	1612	6e-36	149
XLOC_002279	NONGGOT000131.1	100	22	0	0	65	86	1109	1088	0.0008	44.1
XLOC_002280	NONGGOT015934.1	86.67	60	8	0	2009	2068	253	194	5e-07	56
XLOC_002281	NONGGOT001901.1	84.91	265	38	2	961	1223	625	361	3e-48	192
XLOC_002282	NONGGOT000064.1	88.89	54	5	1	1124	1176	581	634	1e-05	52
XLOC_002282	NONGGOT000064.1	88.89	54	5	1	930	982	581	634	1e-05	52
XLOC_002282	NONGGOT000064.1	88.89	54	5	1	1438	1490	581	634	1e-05	52
XLOC_002282	NONGGOT000064.1	88.89	54	5	1	839	891	581	634	1e-05	52
XLOC_002282	NONGGOT000064.1	88.89	54	5	1	786	838	581	634	1e-05	52
XLOC_002282	NONGGOT000064.1	88.89	54	5	1	801	853	581	634	1e-05	52
XLOC_002282	NONGGOT000064.1	88.89	54	5	1	974	1026	581	634	1e-05	52
XLOC_002283	NONGGOT008623.1	84.07	427	59	4	346	766	548	125	1e-76	285
XLOC_002284	NONGGOT007434.1	91.18	34	3	0	309	342	415	448	0.0006	44.1
XLOC_002284	NONGGOT016492.1	100	22	0	0	52	73	886	907	0.0007	44.1
XLOC_002284	NONGGOT005364.1	96.23	53	2	0	393	445	1567	1619	7e-18	89.7
XLOC_002285	NONGGOT019383.1	89.02	346	38	0	1118	1463	2100	2445	4e-106	385
XLOC_002285	NONGGOT004442.1	85.94	64	9	0	232	295	335	272	2e-07	56
XLOC_002285	NONGGOT019383.1	89.02	346	38	0	898	1243	2100	2445	3e-106	385
XLOC_002286	NONGGOT006571.1	84.91	212	31	1	3362	3572	293	504	7e-38	159
XLOC_002286	NONGGOT020409.1	88.3	94	11	0	18	111	1756	1849	6e-21	99.6
XLOC_002286	NONGGOT012538.1	85.37	294	41	2	508	800	1380	1088	5e-48	190
XLOC_002286	NONGGOT006571.1	84.91	212	31	1	2553	2763	293	504	6e-38	159
XLOC_002287	NONGGOT014978.1	87.61	331	38	2	1	329	831	502	5e-86	317
XLOC_002289	NONGGOT019161.1	88.27	196	22	1	100	295	284	478	2e-50	198
XLOC_002290	NONGGOT001349.1	90.16	61	6	0	14	74	687	747	1e-12	73.8
XLOC_002290	NONGGOT001349.1	90.16	61	6	0	11	71	687	747	1e-12	73.8
XLOC_002291	NONGGOT004326.1	93.88	49	3	0	310	358	1	49	4e-13	73.8
XLOC_002291	NONGGOT004326.1	93.88	49	3	0	852	900	1	49	1e-12	73.8
XLOC_002291	NONGGOT000900.1	100	22	0	0	535	556	1102	1123	0.0008	44.1
XLOC_002292	NONGGOT017510.1	88.71	62	7	0	566	627	446	507	5e-11	67.9
XLOC_002292	NONGGOT017510.1	88.71	62	7	0	142	203	446	507	2e-11	67.9
XLOC_002293	NONGGOT004330.1	90.17	407	28	1	2195	2601	60	454	8e-142	504
XLOC_002294	NONGGOT004330.1	92.82	362	22	3	487	845	831	1191	5e-138	490
XLOC_002297	NONGGOT015663.1	86.89	61	7	1	332	391	822	882	5e-06	50.1
XLOC_002299	NONGGOT004862.1	89.92	129	12	1	1	128	1806	1678	8e-35	145
XLOC_002300	NONGGOT004870.1	89.47	76	7	1	6	80	1590	1515	9e-15	79.8
XLOC_002303	NONGGOT018622.1	100	22	0	0	499	520	883	862	0.001	44.1
XLOC_002305	NONGGOT014908.1	88.95	172	19	0	694	865	430	259	9e-48	190
XLOC_002309	NONGGOT004367.1	93.24	74	5	0	125	198	74	1	9e-23	107
XLOC_002309	NONGGOT004367.1	93.24	74	5	0	125	198	74	1	9e-23	107
XLOC_002310	NONGGOT010297.1	94.25	87	5	0	520	606	9683	9597	2e-30	133
XLOC_002311	NONGGOT014389.1	93.55	62	4	0	186	247	1774	1835	9e-19	91.7
XLOC_002312	NONGGOT004380.1	95.58	113	3	1	200	310	4935	4823	8e-45	178
XLOC_002315	NONGGOT004383.1	90.71	226	20	1	7	231	1510	1285	1e-73	274
XLOC_002322	NONGGOT004392.1	92.49	173	13	0	4314	4486	328	156	3e-62	240
XLOC_002331	NONGGOT010103.1	86.86	137	18	0	151	287	320	184	8e-30	129
XLOC_002332	NONGGOT006899.1	100	22	0	0	123	144	852	831	0.0005	44.1
XLOC_002332	NONGGOT006899.1	100	22	0	0	123	144	852	831	0.0004	44.1
XLOC_002333	NONGGOT014608.1	83.8	179	27	1	719	895	397	219	2e-26	119
XLOC_002333	NONGGOT014608.1	83.8	179	27	1	719	895	397	219	2e-26	119
XLOC_002334	NONGGOT005814.1	88.48	269	31	0	1135	1403	3014	2746	8e-77	287
XLOC_002334	NONGGOT009838.1	84.81	158	24	0	881	1038	1231	1074	1e-27	123
XLOC_002335	NONGGOT014000.1	89.92	129	12	1	13	140	180	52	1e-34	145
XLOC_002336	NONGGOT006098.1	89.29	84	8	1	578	661	246	328	7e-17	87.7
XLOC_002336	NONGGOT006098.1	89.29	84	8	1	253	336	246	328	5e-17	87.7
XLOC_002336	NONGGOT006098.1	89.29	84	8	1	307	390	246	328	8e-17	87.7
XLOC_002337	NONGGOT019571.1	89.24	223	22	1	2	224	204	424	2e-52	204
XLOC_002339	NONGGOT008052.1	100	26	0	0	30	55	326	351	1e-05	52
XLOC_002342	NONGGOT010189.1	89.64	280	27	2	3941	4218	759	1038	7e-83	309
XLOC_002342	NONGGOT003951.1	94.52	73	4	0	75	147	143	71	2e-24	113
XLOC_002342	NONGGOT003951.1	94.52	73	4	0	75	147	143	71	1e-24	113
XLOC_002342	NONGGOT007194.1	83.33	108	16	2	480	585	2747	2640	2e-07	56
XLOC_002344	NONGGOT013730.1	86.08	79	11	0	93	171	94	16	6e-12	69.9
XLOC_002345	NONGGOT010610.1	96.55	29	1	0	1938	1966	1247	1275	3e-05	50.1
XLOC_002346	NONGGOT020155.1	89.94	179	18	0	1	179	761	583	1e-54	212
XLOC_002347	NONGGOT017187.1	100	24	0	0	707	730	319	342	5e-05	48.1
XLOC_002347	NONGGOT020370.1	87.3	63	6	1	853	913	817	755	2e-07	56
XLOC_002347	NONGGOT020370.1	87.3	63	6	1	778	838	817	755	2e-07	56
XLOC_002347	NONGGOT017187.1	100	24	0	0	707	730	319	342	5e-05	48.1
XLOC_002348	NONGGOT000872.1	89.58	48	5	0	45	92	32	79	5e-08	56
XLOC_002350	NONGGOT003966.1	97.43	311	7	1	325	634	1135	1445	8e-155	545
XLOC_002350	NONGGOT003966.1	97.43	311	7	1	752	1061	1135	1445	1e-154	545
XLOC_002351	NONGGOT008939.1	82.84	408	65	2	289	692	1790	1384	4e-64	244
XLOC_002354	NONGGOT015541.1	87.27	110	14	0	10	119	1722	1831	3e-23	107
XLOC_002354	NONGGOT004430.1	89.09	55	6	0	286	340	55	1	2e-09	61.9
XLOC_002355	NONGGOT003892.1	83.52	358	47	5	285	634	1247	894	8e-56	216
XLOC_002355	NONGGOT003892.1	83.52	358	47	5	285	634	1247	894	7e-56	216
XLOC_002356	NONGGOT012262.1	100	29	0	0	1	29	1478	1450	3e-08	58
XLOC_002358	NONGGOT013456.1	89.8	49	5	0	503	551	475	523	3e-08	58
XLOC_002372	NONGGOT012099.1	100	24	0	0	533	556	2995	3018	3e-05	48.1
XLOC_002373	NONGGOT007028.1	82.76	116	13	1	141	256	521	413	1e-13	75.8
XLOC_002374	NONGGOT000555.1	94.12	68	4	0	7	74	720	787	5e-22	103
XLOC_002374	NONGGOT000555.1	94.12	68	4	0	7	74	720	787	5e-22	103
XLOC_002376	NONGGOT004485.1	95.4	174	7	1	159	332	219	47	1e-60	232
XLOC_002376	NONGGOT004485.1	95.4	174	7	1	159	332	219	47	1e-60	232
XLOC_002376	NONGGOT004485.1	95.4	174	7	1	159	332	219	47	2e-60	232
XLOC_002388	NONGGOT010489.1	91.18	170	13	1	1	168	891	722	1e-54	212
XLOC_002389	NONGGOT015061.1	86.44	59	8	0	425	483	158	216	8e-07	54
XLOC_002390	NONGGOT004998.1	89	209	22	1	651	859	1087	880	9e-58	224
XLOC_002390	NONGGOT004998.1	89	209	22	1	651	859	1087	880	9e-58	224
XLOC_002395	NONGGOT009750.1	90.85	142	10	1	32	173	286	148	2e-43	174
XLOC_002395	NONGGOT009750.1	90.38	156	12	1	32	187	286	134	4e-47	186
XLOC_002395	NONGGOT009750.1	90.26	154	12	1	32	185	286	136	1e-45	182
XLOC_002395	NONGGOT009750.1	90.85	142	10	1	32	173	286	148	2e-43	174
XLOC_002401	NONGGOT015634.1	89.25	93	9	1	1319	1411	855	946	9e-20	97.6
XLOC_002401	NONGGOT006132.1	87.1	124	15	1	294	417	2135	2013	5e-26	117
XLOC_002401	NONGGOT006132.1	87.1	124	15	1	294	417	2135	2013	7e-26	117
XLOC_002402	NONGGOT017571.1	96.08	51	2	0	1237	1287	2136	2186	3e-16	85.7
XLOC_002404	NONGGOT016299.1	88.11	244	26	3	1560	1800	522	765	1e-59	230
XLOC_002405	NONGGOT002210.1	96	25	1	0	267	291	361	385	0.001	42.1
XLOC_002407	NONGGOT007424.1	92.86	42	3	0	16	57	144	185	7e-09	60
XLOC_002407	NONGGOT020035.1	98.04	51	1	0	5	55	104	154	5e-19	93.7
XLOC_002407	NONGGOT001117.1	86.39	169	16	2	3	164	347	179	6e-35	147
XLOC_002407	NONGGOT001117.1	86.39	169	16	2	3	164	347	179	6e-35	147
XLOC_002407	NONGGOT001117.1	86.39	169	16	2	3	164	347	179	7e-35	147
XLOC_002413	NONGGOT000908.1	85.31	177	26	0	824	1000	860	684	7e-34	145
XLOC_002414	NONGGOT004536.1	96.53	692	22	2	704	1395	1173	484	0	1166
XLOC_002416	NONGGOT001854.1	100	22	0	0	5	26	64	43	0.0004	44.1
XLOC_002420	NONGGOT008051.1	88.46	78	9	0	104	181	2389	2466	7e-16	83.8
XLOC_002420	NONGGOT012658.1	94	50	2	1	4	53	45	93	3e-11	67.9
XLOC_002423	NONGGOT019130.1	85.94	192	22	2	138	324	14	205	3e-38	157
XLOC_002428	NONGGOT017615.1	97.62	42	1	0	527	568	597	638	2e-13	75.8
XLOC_002432	NONGGOT004604.1	95.14	144	7	0	111	254	206	63	2e-60	230
XLOC_002433	NONGGOT004610.1	98.96	96	1	0	28	123	96	1	3e-46	182
XLOC_002433	NONGGOT004610.1	98.96	96	1	0	299	394	96	1	6e-46	182
XLOC_002436	NONGGOT019574.1	84.68	346	43	3	2451	2787	372	28	1e-54	214
XLOC_002436	NONGGOT019574.1	84.68	346	43	3	2451	2787	372	28	1e-54	214
XLOC_002436	NONGGOT019574.1	84.68	346	43	3	2449	2785	372	28	2e-54	214
XLOC_002438	NONGGOT009013.1	82.08	307	29	5	148	450	2	286	3e-43	174
XLOC_002440	NONGGOT009284.1	89.66	87	9	0	31	117	138	52	1e-21	101
XLOC_002445	NONGGOT008052.1	100	26	0	0	367	392	2036	2061	2e-06	52
XLOC_002446	NONGGOT020627.1	88.37	43	5	0	610	652	412	370	0.0002	46.1
XLOC_002447	NONGGOT000996.1	100	29	0	0	690	718	3268	3240	4e-08	58
XLOC_002449	NONGGOT008310.1	100	28	0	0	1423	1450	374	401	4e-07	56
XLOC_002449	NONGGOT008310.1	100	28	0	0	1211	1238	374	401	3e-07	56
XLOC_002451	NONGGOT017363.1	96.3	27	1	0	1051	1077	299	273	0.0002	46.1
XLOC_002452	NONGGOT004634.1	96.61	59	2	0	38	96	135	77	1e-21	101
XLOC_002453	NONGGOT004645.1	100	63	0	0	110	172	201	139	2e-28	125
XLOC_002454	NONGGOT004646.1	93.88	147	9	0	1	147	148	2	1e-57	220
XLOC_002455	NONGGOT004650.1	89.77	215	16	3	633	844	384	173	4e-61	234
XLOC_002456	NONGGOT004653.1	89.19	111	12	0	562	672	556	446	2e-28	125
XLOC_002458	NONGGOT019163.1	92.68	41	3	0	10	50	1250	1290	6e-08	58
XLOC_002460	NONGGOT002292.1	92.52	147	8	1	43	189	2756	2899	5e-51	200
XLOC_002460	NONGGOT002292.1	92.52	147	8	1	43	189	2756	2899	5e-51	200
XLOC_002460	NONGGOT002292.1	92.52	147	8	1	43	189	2756	2899	6e-51	200
XLOC_002461	NONGGOT008901.1	84.69	294	45	0	296	589	886	593	1e-58	226
XLOC_002465	NONGGOT003449.1	89.14	175	19	0	1018	1192	2942	2768	2e-49	196
XLOC_002470	NONGGOT006611.1	89.06	64	7	0	212	275	297	360	2e-12	71.9
XLOC_002470	NONGGOT006611.1	89.06	64	7	0	212	275	297	360	2e-12	71.9
XLOC_002472	NONGGOT006132.1	90.12	81	7	1	565	644	2063	1983	3e-17	89.7
XLOC_002476	NONGGOT008238.1	88.46	104	12	0	383	486	2025	2128	2e-24	111
XLOC_002479	NONGGOT011180.1	82.56	195	32	1	370	564	1144	1336	6e-24	111
XLOC_002479	NONGGOT011180.1	82.56	195	32	1	370	564	1144	1336	5e-24	111
XLOC_002479	NONGGOT011180.1	82.56	195	32	1	370	564	1144	1336	6e-24	111
XLOC_002479	NONGGOT011180.1	82.56	195	32	1	370	564	1144	1336	6e-24	111
XLOC_002479	NONGGOT011180.1	82.56	195	32	1	370	564	1144	1336	6e-24	111
XLOC_002482	NONGGOT014416.1	85.81	148	21	0	218	365	2797	2650	2e-28	127
XLOC_002482	NONGGOT014416.1	85.81	148	21	0	218	365	2797	2650	1e-28	127
XLOC_002482	NONGGOT014416.1	85.81	148	21	0	218	365	2797	2650	1e-28	127
XLOC_002483	NONGGOT020351.1	91.07	56	5	0	42	97	561	506	2e-12	71.9
XLOC_002485	NONGGOT005905.1	89.58	48	2	1	1100	1147	526	570	5e-06	52
XLOC_002486	NONGGOT010559.1	91.3	46	4	0	505	550	1526	1481	1e-08	60
XLOC_002486	NONGGOT010559.1	91.3	46	4	0	656	701	1526	1481	2e-08	60
XLOC_002486	NONGGOT010559.1	91.3	46	4	0	630	675	1526	1481	2e-08	60
XLOC_002486	NONGGOT010559.1	100	25	0	0	123	147	1526	1502	3e-06	50.1
XLOC_002488	NONGGOT004715.1	92.86	84	6	0	384	467	232	149	1e-26	119
XLOC_002488	NONGGOT004715.1	93.02	129	8	1	407	535	232	105	5e-44	176
XLOC_002490	NONGGOT004726.1	95.6	91	4	0	281	371	91	1	8e-36	149
XLOC_002490	NONGGOT004726.1	95.92	98	4	0	251	348	219	122	4e-40	163
XLOC_002491	NONGGOT007403.1	87.96	274	29	3	243	516	790	521	8e-69	260
XLOC_002491	NONGGOT007403.1	87.96	274	29	3	243	516	790	521	7e-69	260
XLOC_002491	NONGGOT007403.1	87.96	274	29	3	243	516	790	521	9e-69	260
XLOC_002491	NONGGOT007403.1	87.96	274	29	3	243	516	790	521	8e-69	260
XLOC_002491	NONGGOT007403.1	87.96	274	29	3	243	516	790	521	9e-69	260
XLOC_002492	NONGGOT014416.1	90.07	272	26	1	1642	1912	2533	2804	1e-85	317
XLOC_002492	NONGGOT014416.1	90.07	272	26	1	1642	1912	2533	2804	2e-85	317
XLOC_002492	NONGGOT014416.1	90.07	272	26	1	1642	1912	2533	2804	2e-85	317
XLOC_002492	NONGGOT014416.1	90.07	272	26	1	1642	1912	2533	2804	2e-85	317
XLOC_002492	NONGGOT014416.1	90.07	272	26	1	1642	1912	2533	2804	2e-85	317
XLOC_002493	NONGGOT001731.1	84.54	207	29	2	4232	4435	800	594	5e-21	103
XLOC_002493	NONGGOT001731.1	84.54	207	29	2	4232	4435	800	594	5e-21	103
XLOC_002494	NONGGOT019219.1	89.01	182	20	0	8	189	762	581	7e-51	202
XLOC_002495	NONGGOT007435.1	93.55	31	2	0	1	31	841	811	7e-05	46.1
XLOC_002495	NONGGOT012345.1	96.97	33	1	0	579	611	1265	1233	3e-08	58
XLOC_002495	NONGGOT012345.1	96.97	33	1	0	358	390	1265	1233	2e-08	58
XLOC_002496	NONGGOT015362.1	91.35	185	16	0	775	959	586	770	7e-63	240
XLOC_002496	NONGGOT019411.1	87.01	77	10	0	818	894	6677	6753	9e-13	73.8
XLOC_002496	NONGGOT015541.1	90.91	110	10	0	1115	1224	1695	1586	2e-32	139
XLOC_002496	NONGGOT007186.1	91.1	146	13	0	1089	1234	1032	887	1e-46	186
XLOC_002500	NONGGOT020359.1	88.84	251	27	1	981	1231	605	854	7e-71	268
XLOC_002500	NONGGOT020359.1	88.84	251	27	1	981	1231	605	854	7e-71	268
XLOC_002501	NONGGOT018255.1	86.55	223	30	0	1	223	1477	1699	2e-52	204
XLOC_002505	NONGGOT020031.1	91.33	173	11	2	1561	1729	1085	913	9e-54	212
XLOC_002505	NONGGOT020031.1	91.33	173	11	2	1561	1729	1085	913	9e-54	212
XLOC_002505	NONGGOT020031.1	91.33	173	11	2	1561	1729	1085	913	5e-54	212
XLOC_002505	NONGGOT020031.1	91.33	173	11	2	1561	1729	1085	913	1e-53	212
XLOC_002505	NONGGOT020031.1	91.33	173	11	2	1561	1729	1085	913	1e-53	212
XLOC_002505	NONGGOT020031.1	91.33	173	11	2	1561	1729	1085	913	1e-53	212
XLOC_002505	NONGGOT020031.1	91.33	173	11	2	1561	1729	1085	913	1e-53	212
XLOC_002506	NONGGOT009224.1	100	23	0	0	612	634	431	409	0.0003	46.1
XLOC_002507	NONGGOT016376.1	93.44	61	4	0	151	211	331	271	3e-18	89.7
XLOC_002509	NONGGOT004794.1	90.1	192	9	1	2	183	300	109	2e-63	240
XLOC_002510	NONGGOT001156.1	92.41	79	6	0	24	102	408	330	2e-23	109
XLOC_002511	NONGGOT004269.1	92.41	79	6	0	2	80	2440	2518	2e-23	109
XLOC_002513	NONGGOT017134.1	93.94	33	2	0	1	33	386	418	7e-06	50.1
XLOC_002514	NONGGOT004298.1	87.31	134	17	0	431	564	3	136	3e-30	131
XLOC_002516	NONGGOT004822.1	91.55	142	12	0	347	488	245	104	4e-47	186
XLOC_002517	NONGGOT009271.1	86.75	151	20	0	1603	1753	704	854	9e-33	141
XLOC_002517	NONGGOT009271.1	86.75	151	20	0	1704	1854	704	854	9e-33	141
XLOC_002517	NONGGOT009271.1	86.75	151	20	0	1632	1782	704	854	9e-33	141
XLOC_002517	NONGGOT009271.1	86.75	151	20	0	1197	1347	704	854	7e-33	141
XLOC_002522	NONGGOT004489.1	89.09	55	6	0	588	642	3	57	2e-09	61.9
XLOC_002524	NONGGOT004836.1	88.21	195	23	0	432	626	2134	1940	3e-52	204
XLOC_002524	NONGGOT004836.1	90.04	452	43	1	432	881	2134	1683	3e-151	533
XLOC_002524	NONGGOT004836.1	90.36	560	49	1	705	1264	1137	583	0	682
XLOC_002524	NONGGOT004836.1	91.18	510	45	0	1155	1664	1137	628	0	654
XLOC_002524	NONGGOT004836.1	91.1	888	72	5	616	1498	2401	1516	0	1098
XLOC_002527	NONGGOT000691.1	100	27	0	0	360	386	2344	2370	4e-07	54
XLOC_002530	NONGGOT013293.1	93.94	33	2	0	1158	1190	241	209	2e-05	50.1
XLOC_002530	NONGGOT013293.1	93.94	33	2	0	364	396	241	209	2e-05	50.1
XLOC_002530	NONGGOT013293.1	93.94	33	2	0	451	483	241	209	2e-05	50.1
XLOC_002534	NONGGOT000923.1	96.15	26	1	0	324	349	3177	3202	0.0004	44.1
XLOC_002534	NONGGOT000923.1	96.15	26	1	0	749	774	3177	3202	0.0007	44.1
XLOC_002537	NONGGOT002292.1	94.44	54	3	0	215	268	2902	2849	3e-16	83.8
XLOC_002538	NONGGOT017617.1	100	26	0	0	22	47	529	504	1e-06	52
XLOC_002539	NONGGOT001188.1	89.13	92	10	0	665	756	413	322	1e-21	103
XLOC_002542	NONGGOT000399.1	91.53	59	5	0	76	134	560	502	3e-14	77.8
XLOC_002543	NONGGOT013987.1	92.98	57	4	0	189	245	74	130	9e-16	81.8
XLOC_002544	NONGGOT011768.1	91.85	319	17	4	6	317	1	317	8e-113	404
XLOC_002548	NONGGOT000948.1	90.14	71	6	1	78	148	363	294	3e-14	77.8
XLOC_002549	NONGGOT004759.1	88.89	54	6	0	545	598	764	817	1e-08	60
XLOC_002550	NONGGOT008266.1	96.2	79	3	0	687	765	26	104	9e-31	133
XLOC_002550	NONGGOT008266.1	96.2	79	3	0	831	909	26	104	1e-30	133
XLOC_002550	NONGGOT008266.1	96.2	79	3	0	491	569	26	104	7e-31	133
XLOC_002550	NONGGOT008266.1	96.2	79	3	0	483	561	26	104	6e-31	133
XLOC_002551	NONGGOT011791.1	91.38	174	15	0	24	197	3	176	7e-59	226
XLOC_002551	NONGGOT011791.1	91.23	171	15	0	19	189	6	176	4e-57	220
XLOC_002551	NONGGOT011791.1	91.48	176	15	0	11	186	1	176	4e-60	230
XLOC_002556	NONGGOT007204.1	89.81	108	11	0	200	307	559	452	3e-29	127
XLOC_002557	NONGGOT020077.1	96.67	60	2	0	111	170	1047	1106	6e-22	103
XLOC_002558	NONGGOT001181.1	90.2	51	5	0	507	557	516	566	4e-09	61.9
XLOC_002559	NONGGOT017809.1	87.4	127	16	0	814	940	1707	1581	4e-28	125
XLOC_002561	NONGGOT003938.1	94.82	328	15	2	321	648	1004	679	4e-141	500
XLOC_002561	NONGGOT003938.1	94.82	328	15	2	647	974	1004	679	5e-141	500
XLOC_002562	NONGGOT011807.1	92.97	128	7	2	325	450	171	298	4e-41	167
XLOC_002562	NONGGOT011807.1	92.97	128	7	2	380	505	171	298	5e-41	167
XLOC_002562	NONGGOT011807.1	92.97	128	7	2	302	427	171	298	4e-41	167
XLOC_002562	NONGGOT011807.1	92.97	128	7	2	343	468	171	298	4e-41	167
XLOC_002562	NONGGOT011807.1	92.97	128	7	2	386	511	171	298	5e-41	167
XLOC_002563	NONGGOT008376.1	91.43	105	8	1	1149	1253	788	685	2e-29	129
XLOC_002563	NONGGOT008376.1	91.43	105	8	1	1047	1151	788	685	2e-29	129
XLOC_002563	NONGGOT008376.1	91.43	105	8	1	636	740	788	685	1e-29	129
XLOC_002564	NONGGOT004272.1	83.05	118	19	1	1662	1779	482	366	2e-10	67.9
XLOC_002564	NONGGOT004272.1	83.05	118	19	1	1309	1426	482	366	1e-10	67.9
XLOC_002564	NONGGOT004272.1	83.05	118	19	1	1119	1236	482	366	1e-10	67.9
XLOC_002567	NONGGOT007058.1	86.15	130	16	2	2022	2150	715	843	5e-20	99.6
XLOC_002567	NONGGOT009339.1	91.49	47	4	0	474	520	1054	1100	2e-09	61.9
XLOC_002568	NONGGOT009314.1	87.55	273	34	0	763	1035	2749	2477	4e-72	272
XLOC_002570	NONGGOT009339.1	96.43	28	1	0	511	538	977	1004	3e-05	48.1
XLOC_002572	NONGGOT005003.1	85.28	265	33	1	960	1224	1120	862	4e-56	218
XLOC_002575	NONGGOT011039.1	87.89	223	27	0	369	591	987	1209	4e-59	228
XLOC_002576	NONGGOT011830.1	91.45	234	20	0	4	237	297	530	4e-83	305
XLOC_002578	NONGGOT012271.1	92.98	57	4	0	91	147	95	39	2e-15	81.8
XLOC_002584	NONGGOT011852.1	93.21	560	36	2	1	559	44	602	0	793
XLOC_002585	NONGGOT012298.1	96.43	56	2	0	66	121	56	1	1e-19	95.6
XLOC_002587	NONGGOT011865.1	93.89	311	12	4	227	535	1	306	6e-123	440
XLOC_002587	NONGGOT011865.1	94.14	273	10	3	114	384	38	306	8e-110	396
XLOC_002587	NONGGOT011865.1	93.98	299	11	4	148	444	1	294	1e-118	424
XLOC_002587	NONGGOT011865.1	94.14	273	10	3	49	319	38	306	7e-110	396
XLOC_002588	NONGGOT004633.1	89.74	39	4	0	486	524	1153	1191	0.0004	46.1
XLOC_002589	NONGGOT020371.1	89.67	184	17	1	3297	3478	1324	1507	9e-53	208
XLOC_002590	NONGGOT011869.1	100	89	0	0	181	269	1	89	6e-44	176
XLOC_002590	NONGGOT011869.1	100	89	0	0	181	269	1	89	4e-44	176
XLOC_002591	NONGGOT011870.1	95.44	285	11	2	1	285	431	713	8e-113	404
XLOC_002596	NONGGOT011234.1	90.77	65	6	0	16	80	783	847	3e-15	81.8
XLOC_002605	NONGGOT012333.1	98.39	62	1	0	97	158	62	1	3e-25	115
XLOC_002605	NONGGOT012333.1	98.39	62	1	0	81	142	62	1	3e-25	115
XLOC_002606	NONGGOT011905.1	95.45	66	3	0	44	109	1	66	2e-23	107
XLOC_002607	NONGGOT018353.1	97.5	40	1	0	261	300	86	47	4e-12	71.9
XLOC_002608	NONGGOT012035.1	88.24	102	12	0	1	102	4259	4158	6e-23	107
XLOC_002608	NONGGOT016246.1	81.61	87	16	0	225	311	114	200	0.0001	46.1
XLOC_002611	NONGGOT012336.1	95.6	182	8	0	887	1068	465	284	4e-80	297
XLOC_002614	NONGGOT012151.1	89.25	93	10	0	5	97	1423	1515	1e-22	105
XLOC_002615	NONGGOT003424.1	88.89	63	7	0	93	155	1120	1182	3e-12	69.9
XLOC_002616	NONGGOT012804.1	93.33	30	2	0	261	290	978	949	0.0004	44.1
XLOC_002622	NONGGOT016256.1	87.5	96	11	1	383	478	711	805	3e-17	87.7
XLOC_002628	NONGGOT007403.1	86.72	271	35	1	1603	1873	521	790	9e-64	244
XLOC_002638	NONGGOT016280.1	86.73	211	28	0	789	999	1510	1720	1e-49	196
XLOC_002639	NONGGOT011364.1	87.96	216	24	1	736	951	542	329	1e-55	216
XLOC_002642	NONGGOT016299.1	92.94	269	19	0	1447	1715	789	521	6e-105	383
XLOC_002643	NONGGOT017207.1	96.15	26	1	0	634	659	101	76	0.0006	44.1
XLOC_002645	NONGGOT020627.1	100	25	0	0	475	499	357	381	1e-05	50.1
XLOC_002645	NONGGOT011992.1	95.55	247	11	0	1243	1489	433	679	1e-111	402
XLOC_002645	NONGGOT011992.1	95.55	247	11	0	964	1210	433	679	1e-111	402
XLOC_002645	NONGGOT011992.1	95.55	247	11	0	1176	1422	433	679	1e-111	402
XLOC_002645	NONGGOT011992.1	95.55	247	11	0	1163	1409	433	679	1e-111	402
XLOC_002645	NONGGOT011992.1	95.55	247	11	0	1024	1270	433	679	1e-111	402
XLOC_002645	NONGGOT011992.1	95.55	247	11	0	1167	1413	433	679	1e-111	402
XLOC_002645	NONGGOT020627.1	100	25	0	0	547	571	357	381	1e-05	50.1
XLOC_002645	NONGGOT020627.1	100	25	0	0	551	575	357	381	1e-05	50.1
XLOC_002645	NONGGOT011992.1	95.55	247	11	0	414	660	433	679	7e-112	402
XLOC_002645	NONGGOT015620.1	100	23	0	0	3	25	927	949	0.0001	46.1
XLOC_002653	NONGGOT012014.1	96.36	357	11	2	129	485	1	355	9e-168	589
XLOC_002653	NONGGOT012014.1	97.5	80	2	0	112	191	1	80	8e-34	143
XLOC_002653	NONGGOT012014.1	95.68	185	7	1	103	287	1	184	7e-80	295
XLOC_002653	NONGGOT012014.1	95.68	185	7	1	95	279	1	184	9e-80	295
XLOC_002655	NONGGOT012021.1	92.38	223	16	1	272	493	1	223	4e-81	299
XLOC_002656	NONGGOT007485.1	90.16	254	24	1	381	634	1784	2036	4e-80	297
XLOC_002656	NONGGOT007485.1	90.16	254	24	1	472	725	1784	2036	5e-80	297
XLOC_002659	NONGGOT005980.1	84.48	58	9	0	66	123	1123	1180	0.0008	44.1
XLOC_002662	NONGGOT018917.1	96.15	26	1	0	61	86	363	338	0.001	44.1
XLOC_002662	NONGGOT018917.1	96.15	26	1	0	61	86	363	338	0.0004	44.1
XLOC_002662	NONGGOT018917.1	96.15	26	1	0	182	207	363	338	0.0005	44.1
XLOC_002663	NONGGOT009452.1	81.52	211	37	1	531	741	1704	1912	1e-21	103
XLOC_002666	NONGGOT017723.1	85.48	241	35	0	10	250	1	241	3e-51	200
XLOC_002668	NONGGOT012032.1	91.11	45	4	0	424	468	520	564	6e-08	58
XLOC_002670	NONGGOT007331.1	81.76	1124	184	10	929	2041	204	1317	1e-143	509
XLOC_002671	NONGGOT011266.1	87.69	260	32	0	2	261	980	721	2e-69	262
XLOC_002671	NONGGOT011266.1	88.96	154	17	0	2	155	874	721	7e-42	170
XLOC_002671	NONGGOT015495.1	84.24	203	30	2	447	648	1158	957	1e-30	133
XLOC_002673	NONGGOT012040.1	91.64	742	54	6	1	737	503	1241	0	936
XLOC_002676	NONGGOT001737.1	100	22	0	0	224	245	3143	3122	0.0002	44.1
XLOC_002678	NONGGOT008929.1	90.59	170	12	3	2503	2669	2440	2608	9e-47	188
XLOC_002678	NONGGOT008929.1	90.59	170	12	3	2373	2539	2440	2608	9e-47	188
XLOC_002678	NONGGOT008929.1	90.59	170	12	3	1687	1853	2440	2608	7e-47	188
XLOC_002678	NONGGOT008929.1	90.59	170	12	3	1450	1616	2440	2608	7e-47	188
XLOC_002678	NONGGOT008929.1	90.59	170	12	3	1454	1620	2440	2608	7e-47	188
XLOC_002680	NONGGOT010188.1	93.59	234	13	1	7	238	341	574	2e-79	297
XLOC_002680	NONGGOT010188.1	93.12	160	9	1	3	160	415	574	9e-59	224
XLOC_002680	NONGGOT012045.1	90.48	189	12	1	139	327	1	183	3e-61	234
XLOC_002683	NONGGOT009772.1	96.3	27	1	0	425	451	1255	1229	0.0001	46.1
XLOC_002683	NONGGOT009772.1	96.3	27	1	0	269	295	1255	1229	7e-05	46.1
XLOC_002696	NONGGOT017705.1	96.15	26	1	0	348	373	3117	3142	0.0008	44.1
XLOC_002697	NONGGOT000726.1	96.72	61	2	0	927	987	959	899	3e-22	105
XLOC_002697	NONGGOT012095.1	93.46	153	9	1	576	727	1	153	1e-55	216
XLOC_002697	NONGGOT000726.1	96.72	61	2	0	651	711	959	899	2e-22	105
XLOC_002697	NONGGOT007902.1	93.62	282	18	0	776	1057	137	418	2e-115	416
XLOC_002697	NONGGOT007902.1	93.62	282	18	0	1045	1326	137	418	2e-115	416
XLOC_002697	NONGGOT007902.1	93.62	282	18	0	912	1193	137	418	2e-115	416
XLOC_002697	NONGGOT007902.1	93.62	282	18	0	2321	2602	137	418	3e-115	416
XLOC_002697	NONGGOT007902.1	93.62	282	18	0	557	838	137	418	2e-115	416
XLOC_002697	NONGGOT006132.1	88.56	271	26	2	957	1222	1441	1711	3e-75	281
XLOC_002697	NONGGOT007902.1	93.62	282	18	0	663	944	137	418	2e-115	416
XLOC_002697	NONGGOT012095.1	93.46	153	9	1	71	222	1	153	4e-56	216
XLOC_002698	NONGGOT012502.1	97.78	45	1	0	1561	1605	172	128	6e-15	81.8
XLOC_002699	NONGGOT005365.1	100	39	0	0	1	39	936	974	4e-14	77.8
XLOC_002700	NONGGOT012106.1	93.75	112	7	0	85	196	42	153	5e-41	167
XLOC_002703	NONGGOT002392.1	93.55	62	4	0	489	550	2552	2613	2e-18	91.7
XLOC_002705	NONGGOT012189.1	96.61	59	2	0	405	463	127	69	3e-21	101
XLOC_002705	NONGGOT012189.1	96.61	59	2	0	547	605	127	69	4e-21	101
XLOC_002705	NONGGOT012189.1	96.61	59	2	0	405	463	127	69	3e-21	101
XLOC_002705	NONGGOT012189.1	96.61	59	2	0	547	605	127	69	3e-21	101
XLOC_002705	NONGGOT012189.1	96.61	59	2	0	405	463	127	69	3e-21	101
XLOC_002705	NONGGOT012189.1	96.61	59	2	0	405	463	127	69	3e-21	101
XLOC_002705	NONGGOT012189.1	96.61	59	2	0	519	577	127	69	3e-21	101
XLOC_002705	NONGGOT012189.1	96.61	59	2	0	738	796	127	69	5e-21	101
XLOC_002705	NONGGOT012189.1	96.61	59	2	0	62	120	127	69	1e-21	101
XLOC_002705	NONGGOT010886.1	83.82	68	11	0	38	105	378	445	2e-05	48.1
XLOC_002706	NONGGOT019837.1	94.87	39	2	0	338	376	6944	6906	1e-09	61.9
XLOC_002710	NONGGOT007137.1	91.14	79	5	1	282	360	378	302	2e-19	95.6
XLOC_002711	NONGGOT018255.1	95.7	93	4	0	144	236	1473	1565	1e-36	153
XLOC_002713	NONGGOT012234.1	93.87	163	7	1	592	754	876	717	9e-63	240
XLOC_002713	NONGGOT012234.1	89.57	393	18	3	756	1145	612	240	5e-132	470
XLOC_002713	NONGGOT012234.1	96.52	287	9	1	1	287	1161	876	9e-136	482
XLOC_002715	NONGGOT012236.1	97.52	121	3	0	1	121	471	351	2e-56	216
XLOC_002717	NONGGOT016040.1	84.23	279	39	3	46	323	2180	2454	3e-46	184
XLOC_002719	NONGGOT005895.1	94.64	168	9	0	23	190	5	172	2e-69	262
XLOC_002719	NONGGOT005895.1	94.64	168	9	0	23	190	5	172	2e-69	262
XLOC_002721	NONGGOT018378.1	87.5	112	14	0	219	330	47	158	2e-24	111
XLOC_002722	NONGGOT003236.1	93.65	63	4	0	23	85	226	288	3e-19	93.7
XLOC_002723	NONGGOT016918.1	93.75	32	2	0	108	139	684	715	4e-05	48.1
XLOC_002723	NONGGOT008838.1	91.18	102	7	1	1	102	83	182	4e-28	125
XLOC_002723	NONGGOT008838.1	91.18	102	7	1	1	102	83	182	2e-28	125
XLOC_002724	NONGGOT014978.1	89.47	76	8	0	9	84	61	136	3e-17	87.7
XLOC_002725	NONGGOT020163.1	86.55	119	13	1	1013	1131	4594	4709	6e-22	105
XLOC_002726	NONGGOT012270.1	97.5	80	2	0	520	599	180	101	7e-34	143
XLOC_002727	NONGGOT004151.1	94.12	34	2	0	380	413	102	135	1e-06	52
XLOC_002731	NONGGOT007230.1	87.1	93	12	0	881	973	446	354	2e-17	89.7
XLOC_002731	NONGGOT007230.1	87.1	93	12	0	881	973	446	354	2e-17	89.7
XLOC_002733	NONGGOT015003.1	95.65	46	2	0	1	46	116	161	5e-13	75.8
XLOC_002735	NONGGOT020638.1	91.67	48	4	0	298	345	17	64	4e-10	63.9
XLOC_002735	NONGGOT009767.1	86.82	220	22	2	773	985	2862	3081	9e-51	200
XLOC_002735	NONGGOT009767.1	86.82	220	22	2	724	936	2862	3081	1e-50	200
XLOC_002736	NONGGOT012314.1	96.83	126	4	0	49	174	128	3	8e-57	218
XLOC_002737	NONGGOT002691.1	91.07	56	5	0	618	673	1908	1853	5e-12	71.9
XLOC_002739	NONGGOT012320.1	94.55	202	10	1	543	743	524	323	1e-82	305
XLOC_002739	NONGGOT019090.1	96.77	31	1	0	95	125	518	488	3e-07	54
XLOC_002739	NONGGOT012107.1	89.36	141	15	0	320	460	544	684	4e-39	161
XLOC_002739	NONGGOT012320.1	94.55	202	10	1	1058	1258	524	323	2e-82	305
XLOC_002746	NONGGOT012330.1	98.04	51	1	0	1494	1544	118	68	2e-18	93.7
XLOC_002746	NONGGOT012330.1	98	50	1	0	1263	1312	117	68	6e-18	91.7
XLOC_002746	NONGGOT012331.1	92.34	222	8	1	1788	2000	827	606	1e-84	313
XLOC_002746	NONGGOT012331.1	97.18	71	2	0	1423	1493	376	306	5e-28	125
XLOC_002746	NONGGOT012330.1	94.26	122	7	0	1505	1626	447	326	2e-46	186
XLOC_002746	NONGGOT012331.1	95.03	523	15	3	1677	2189	827	306	0	823
XLOC_002747	NONGGOT009774.1	90.77	65	6	0	25	89	953	889	8e-16	81.8
XLOC_002749	NONGGOT014393.1	87.6	258	31	1	1	257	3176	2919	1e-65	250
XLOC_002749	NONGGOT019405.1	83.33	258	42	1	820	1076	3885	3628	2e-39	163
XLOC_002754	NONGGOT012343.1	93.75	176	11	0	394	569	233	58	1e-69	262
XLOC_002754	NONGGOT012343.1	93.75	176	11	0	394	569	233	58	1e-69	262
XLOC_002755	NONGGOT005542.1	94.81	77	4	0	1	77	893	969	2e-27	121
XLOC_002757	NONGGOT011657.1	89.19	111	11	1	76	185	465	355	5e-26	117
XLOC_002763	NONGGOT008721.1	88.37	129	15	0	202	330	7	135	6e-32	137
XLOC_002766	NONGGOT015816.1	93.75	32	2	0	38	69	692	723	4e-05	48.1
XLOC_002768	NONGGOT002294.1	89.72	107	11	0	6	112	265	371	2e-28	125
XLOC_002769	NONGGOT012400.1	95.51	89	4	0	36	124	89	1	2e-34	145
XLOC_002769	NONGGOT012401.1	94.87	117	5	1	153	268	742	626	2e-44	176
XLOC_002770	NONGGOT006864.1	100	23	0	0	295	317	155	133	0.0001	46.1
XLOC_002770	NONGGOT006864.1	100	23	0	0	153	175	155	133	7e-05	46.1
XLOC_002770	NONGGOT006864.1	100	23	0	0	151	173	155	133	7e-05	46.1
XLOC_002770	NONGGOT006864.1	100	23	0	0	417	439	155	133	0.0001	46.1
XLOC_002770	NONGGOT006864.1	100	23	0	0	548	570	155	133	0.0002	46.1
XLOC_002775	NONGGOT012410.1	96.83	189	6	0	419	607	849	661	2e-89	327
XLOC_002775	NONGGOT012410.1	93.71	143	9	0	184	326	1164	1022	1e-54	212
XLOC_002780	NONGGOT003892.1	91.79	195	14	2	340	534	1112	920	3e-64	244
XLOC_002781	NONGGOT009021.1	88.64	273	28	3	160	430	124	395	3e-72	272
XLOC_002781	NONGGOT009021.1	88.64	273	28	3	160	430	124	395	3e-72	272
XLOC_002781	NONGGOT009021.1	88.64	273	28	3	160	430	124	395	3e-72	272
XLOC_002781	NONGGOT009021.1	88.64	273	28	3	160	430	124	395	3e-72	272
XLOC_002781	NONGGOT009021.1	88.64	273	28	3	160	430	124	395	3e-72	272
XLOC_002781	NONGGOT009021.1	88.64	273	28	3	160	430	124	395	3e-72	272
XLOC_002781	NONGGOT009021.1	88.64	273	28	3	160	430	124	395	3e-72	272
XLOC_002782	NONGGOT008721.1	94.23	52	3	0	3	54	17	68	5e-15	79.8
XLOC_002785	NONGGOT019349.1	94.12	51	3	0	423	473	1128	1078	1e-13	77.8
XLOC_002787	NONGGOT012431.1	94.32	176	8	2	35	208	212	37	9e-68	254
XLOC_002789	NONGGOT013812.1	88.33	60	4	2	69	125	572	513	5e-06	50.1
XLOC_002795	NONGGOT012700.1	83.05	118	18	1	237	352	595	712	2e-11	69.9
XLOC_002795	NONGGOT012700.1	83.05	118	18	1	237	352	595	712	2e-11	69.9
XLOC_002795	NONGGOT012700.1	83.05	118	18	1	237	352	595	712	2e-11	69.9
XLOC_002795	NONGGOT019834.1	100	28	0	0	2	29	2207	2234	1e-07	56
XLOC_002796	NONGGOT015103.1	83.2	387	59	3	2200	2580	926	540	1e-60	234
XLOC_002796	NONGGOT004374.1	84.34	198	31	0	1977	2174	534	731	2e-34	147
XLOC_002798	NONGGOT014086.1	89.19	37	4	0	48	84	116	80	0.0008	42.1
XLOC_002799	NONGGOT009451.1	86.13	137	19	0	233	369	2301	2437	3e-27	121
XLOC_002799	NONGGOT009451.1	86.13	137	19	0	138	274	2301	2437	3e-27	121
XLOC_002799	NONGGOT009451.1	86.13	137	19	0	186	322	2301	2437	3e-27	121
XLOC_002800	NONGGOT002320.1	93.94	33	2	0	190	222	152	120	5e-06	50.1
XLOC_002800	NONGGOT004620.1	95.45	66	3	0	386	451	269	204	3e-23	107
XLOC_002802	NONGGOT012558.1	86.32	95	13	0	97	191	201	295	3e-16	85.7
XLOC_002803	NONGGOT002036.1	86.92	130	12	1	251	380	1176	1052	2e-27	123
XLOC_002803	NONGGOT002036.1	86.92	130	12	1	251	380	1176	1052	1e-27	123
XLOC_002803	NONGGOT002036.1	86.92	130	12	1	251	380	1176	1052	1e-27	123
XLOC_002803	NONGGOT002036.1	86.82	129	12	1	251	379	1176	1053	9e-27	121
XLOC_002804	NONGGOT016689.1	93.88	49	3	0	1	49	2566	2518	5e-13	73.8
XLOC_002806	NONGGOT015709.1	96.15	26	1	0	141	166	552	577	0.0003	44.1
XLOC_002810	NONGGOT012485.1	87.82	312	32	2	1	306	1903	1592	5e-84	309
XLOC_002810	NONGGOT012485.1	94.52	146	8	0	74	219	526	381	4e-59	226
XLOC_002810	NONGGOT012485.1	94.52	146	8	0	65	210	526	381	4e-59	226
XLOC_002811	NONGGOT006734.1	100	27	0	0	843	869	146	120	2e-06	54
XLOC_002811	NONGGOT020545.1	96.43	28	1	0	210	237	1037	1010	4e-05	48.1
XLOC_002814	NONGGOT005072.1	96.77	31	1	0	127	157	69	99	6e-07	54
XLOC_002814	NONGGOT005072.1	96.77	31	1	0	127	157	69	99	4e-07	54
XLOC_002815	NONGGOT018252.1	90.83	327	26	3	595	918	353	28	1e-107	389
XLOC_002815	NONGGOT018252.1	90.7	344	27	4	595	934	353	11	1e-110	398
XLOC_002815	NONGGOT018252.1	90.83	327	26	3	595	918	353	28	1e-107	389
XLOC_002815	NONGGOT018252.1	90.59	340	27	4	595	930	353	15	3e-108	391
XLOC_002815	NONGGOT018252.1	90.59	340	27	4	595	930	353	15	3e-108	391
XLOC_002815	NONGGOT018252.1	90.83	327	26	3	595	918	353	28	1e-107	389
XLOC_002819	NONGGOT012697.1	87.04	54	5	1	2590	2643	1858	1807	0.0006	46.1
XLOC_002819	NONGGOT016299.1	91.27	229	19	1	2476	2704	537	764	1e-76	287
XLOC_002819	NONGGOT012697.1	87.04	54	5	1	1363	1416	1858	1807	0.0003	46.1
XLOC_002819	NONGGOT012697.1	87.04	54	5	1	1836	1889	1858	1807	0.0004	46.1
XLOC_002819	NONGGOT016299.1	91.27	229	19	1	589	817	537	764	6e-77	287
XLOC_002820	NONGGOT000852.1	89.9	99	10	0	369	467	574	476	9e-26	117
XLOC_002820	NONGGOT000852.1	91.67	72	6	0	1	72	547	476	4e-19	95.6
XLOC_002822	NONGGOT006049.1	91.11	180	16	0	1102	1281	221	400	9e-60	230
XLOC_002824	NONGGOT015672.1	93.22	59	4	0	970	1028	202	144	3e-16	85.7
XLOC_002825	NONGGOT016299.1	92.34	222	13	1	511	728	781	560	6e-82	303
XLOC_002829	NONGGOT010657.1	88.58	324	32	4	321	641	1	322	6e-87	319
XLOC_002830	NONGGOT019160.1	100	23	0	0	464	486	363	341	0.0002	46.1
XLOC_002830	NONGGOT019051.1	100	35	0	0	1	35	12	46	1e-11	69.9
XLOC_002832	NONGGOT010672.1	93.33	60	4	0	86	145	59	118	6e-17	87.7
XLOC_002832	NONGGOT010672.1	96.03	126	5	0	47	172	556	681	1e-53	210
XLOC_002833	NONGGOT008857.1	90.7	86	8	0	3142	3227	1307	1222	3e-22	107
XLOC_002833	NONGGOT000866.1	88.33	240	28	0	3744	3983	1392	1631	7e-54	212
XLOC_002833	NONGGOT008857.1	90.7	86	8	0	3063	3148	1307	1222	3e-22	107
XLOC_002833	NONGGOT016289.1	85.51	69	10	0	1758	1826	247	315	1e-07	58
XLOC_002833	NONGGOT016289.1	85.51	69	10	0	1860	1928	247	315	1e-07	58
XLOC_002833	NONGGOT004250.1	80.99	142	23	1	949	1086	177	318	3e-10	65.9
XLOC_002833	NONGGOT008857.1	90.7	86	8	0	3499	3584	1307	1222	3e-22	107
XLOC_002833	NONGGOT016289.1	85.51	69	10	0	2277	2345	247	315	1e-07	58
XLOC_002833	NONGGOT008857.1	90.7	86	8	0	2725	2810	1307	1222	2e-22	107
XLOC_002833	NONGGOT016289.1	85.51	69	10	0	416	484	247	315	3e-08	58
XLOC_002836	NONGGOT010463.1	85.71	56	8	0	9	64	115	170	2e-05	48.1
XLOC_002838	NONGGOT010680.1	90.24	82	8	0	86	167	119	200	2e-20	99.6
XLOC_002840	NONGGOT010686.1	87.25	306	16	3	7	290	2085	2389	2e-85	313
XLOC_002841	NONGGOT010686.1	86.35	359	34	1	29	387	5462	5805	3e-94	343
XLOC_002843	NONGGOT014837.1	89.89	89	9	0	1031	1119	103	191	3e-22	105
XLOC_002843	NONGGOT014837.1	89.89	89	9	0	895	983	103	191	3e-22	105
XLOC_002846	NONGGOT002205.1	89.89	89	9	0	579	667	960	1048	2e-22	105
XLOC_002847	NONGGOT009812.1	92.13	89	7	0	648	736	923	1011	6e-27	121
XLOC_002848	NONGGOT012104.1	88.89	225	25	0	61	285	1304	1080	4e-65	248
XLOC_002849	NONGGOT012885.1	94.87	39	2	0	287	325	934	972	2e-09	61.9
XLOC_002851	NONGGOT016811.1	92.06	63	5	0	226	288	91	29	2e-16	85.7
XLOC_002851	NONGGOT010722.1	89.73	146	12	1	80	222	817	962	3e-41	167
XLOC_002851	NONGGOT016811.1	92.06	63	5	0	209	271	91	29	2e-16	85.7
XLOC_002851	NONGGOT016811.1	92.06	63	5	0	214	276	91	29	2e-16	85.7
XLOC_002852	NONGGOT015099.1	84.96	133	19	1	172	303	448	316	6e-20	97.6
XLOC_002853	NONGGOT010730.1	95.18	83	4	0	151	233	1	83	5e-31	133
XLOC_002855	NONGGOT006257.1	85	100	14	1	180	278	3778	3877	1e-12	71.9
XLOC_002859	NONGGOT010758.1	95	120	5	1	116	235	364	482	9e-46	182
XLOC_002859	NONGGOT010758.1	90.98	244	10	3	112	344	240	482	4e-82	303
XLOC_002859	NONGGOT010758.1	90.38	260	10	2	1	246	224	482	3e-89	327
XLOC_002859	NONGGOT010758.1	88	175	7	1	1	161	237	411	2e-50	198
XLOC_002862	NONGGOT010762.1	93.71	175	11	0	1	175	174	348	3e-69	260
XLOC_002866	NONGGOT010771.1	97.27	256	7	0	352	607	115	370	5e-114	410
XLOC_002866	NONGGOT010771.1	94.74	114	4	1	343	454	371	484	7e-43	172
XLOC_002869	NONGGOT010778.1	92.61	568	33	2	5	572	6	564	0	797
XLOC_002869	NONGGOT010778.1	91.18	567	28	1	1	567	20	564	0	761
XLOC_002869	NONGGOT010778.1	94.6	315	17	0	1	315	38	352	6e-138	490
XLOC_002869	NONGGOT010778.1	94.35	283	16	0	1	283	70	352	7e-122	434
XLOC_002871	NONGGOT012392.1	89.01	273	27	2	1426	1696	1945	2216	2e-77	289
XLOC_002871	NONGGOT003956.1	82.18	101	16	1	143	243	163	65	7e-06	52
XLOC_002878	NONGGOT006795.1	85.97	278	34	1	639	916	867	595	2e-54	212
XLOC_002881	NONGGOT020030.1	87.88	264	31	1	17	280	157	419	1e-69	262
XLOC_002882	NONGGOT006236.1	93.55	62	4	0	376	437	2392	2453	2e-18	91.7
XLOC_002885	NONGGOT009758.1	88.84	224	23	1	90	313	371	150	1e-62	240
XLOC_002885	NONGGOT017615.1	90.91	55	5	0	242	296	490	544	1e-11	69.9
XLOC_002887	NONGGOT010760.1	91.67	96	8	0	1298	1393	545	450	1e-28	127
XLOC_002887	NONGGOT010760.1	91.67	96	8	0	298	393	545	450	6e-29	127
XLOC_002888	NONGGOT005847.1	100	22	0	0	112	133	964	985	0.0002	44.1
XLOC_002890	NONGGOT006694.1	91.22	262	23	0	6	267	610	349	2e-91	337
XLOC_002892	NONGGOT010822.1	92.25	258	20	0	97	354	1	258	4e-97	353
XLOC_002892	NONGGOT010822.1	94.15	171	10	0	36	206	989	1159	2e-69	260
XLOC_002893	NONGGOT010825.1	95	320	11	1	2	321	29	343	1e-129	460
XLOC_002895	NONGGOT011345.1	93.75	464	13	5	1931	2381	1590	1130	0	672
XLOC_002902	NONGGOT017629.1	100	31	0	0	7	37	114	84	2e-09	61.9
XLOC_002902	NONGGOT015242.1	100	22	0	0	243	264	3604	3625	0.0002	44.1
XLOC_002904	NONGGOT020163.1	88.67	203	22	1	471	673	5720	5921	1e-54	212
XLOC_002904	NONGGOT003432.1	100	37	0	0	65	101	1257	1293	1e-12	73.8
XLOC_002904	NONGGOT010859.1	94.92	59	3	0	1	59	104	162	7e-19	93.7
XLOC_002905	NONGGOT020351.1	90.3	268	24	2	1565	1831	507	773	2e-83	309
XLOC_002905	NONGGOT016560.1	87.88	66	7	1	547	611	508	573	2e-08	60
XLOC_002905	NONGGOT020351.1	90.3	268	24	2	813	1079	507	773	1e-83	309
XLOC_002905	NONGGOT020351.1	90.3	268	24	2	814	1080	507	773	1e-83	309
XLOC_002907	NONGGOT011368.1	97.22	72	2	0	235	306	752	681	3e-29	127
XLOC_002909	NONGGOT010211.1	87.96	274	26	3	428	700	329	62	1e-70	266
XLOC_002912	NONGGOT019161.1	86.53	245	33	0	1873	2117	280	524	1e-57	224
XLOC_002912	NONGGOT019161.1	86.53	245	33	0	1472	1716	280	524	8e-58	224
XLOC_002914	NONGGOT010890.1	94.74	57	3	0	1	57	150	206	3e-18	89.7
XLOC_002916	NONGGOT019571.1	96	50	2	0	338	387	379	428	4e-16	83.8
XLOC_002919	NONGGOT020280.1	93.67	79	3	1	330	406	342	264	2e-24	111
XLOC_002923	NONGGOT012574.1	88.64	44	5	0	257	300	13	56	2e-05	48.1
XLOC_002924	NONGGOT001100.1	93.75	48	3	0	783	830	323	370	6e-12	71.9
XLOC_002925	NONGGOT008183.1	86.89	122	16	0	280	401	606	727	7e-25	115
XLOC_002925	NONGGOT014389.1	100	24	0	0	164	187	1789	1766	4e-05	48.1
XLOC_002926	NONGGOT010252.1	100	25	0	0	383	407	778	802	6e-06	50.1
XLOC_002927	NONGGOT003801.1	83.33	192	25	4	28	215	539	351	4e-21	101
XLOC_002933	NONGGOT001225.1	90.48	63	6	0	628	690	174	236	4e-14	77.8
XLOC_002933	NONGGOT010428.1	86.33	256	31	3	1127	1382	2294	2545	5e-53	208
XLOC_002933	NONGGOT010428.1	86.33	256	31	3	1163	1418	2294	2545	5e-53	208
XLOC_002933	NONGGOT010428.1	86.33	256	31	3	2076	2331	2294	2545	7e-53	208
XLOC_002933	NONGGOT010428.1	86.33	256	31	3	1293	1548	2294	2545	5e-53	208
XLOC_002933	NONGGOT010428.1	86.33	256	31	3	1208	1463	2294	2545	5e-53	208
XLOC_002933	NONGGOT016641.1	100	23	0	0	379	401	295	273	0.0002	46.1
XLOC_002933	NONGGOT010428.1	86.33	256	31	3	1299	1554	2294	2545	5e-53	208
XLOC_002933	NONGGOT010428.1	86.33	256	31	3	850	1105	2294	2545	4e-53	208
XLOC_002933	NONGGOT010428.1	86.33	256	31	3	636	891	2294	2545	4e-53	208
XLOC_002933	NONGGOT010428.1	86.33	256	31	3	603	858	2294	2545	4e-53	208
XLOC_002933	NONGGOT010428.1	86.33	256	31	3	541	796	2294	2545	3e-53	208
XLOC_002933	NONGGOT010428.1	86.33	256	31	3	534	789	2294	2545	3e-53	208
XLOC_002933	NONGGOT010428.1	86.33	256	31	3	433	688	2294	2545	3e-53	208
XLOC_002933	NONGGOT010428.1	86.33	256	31	3	389	644	2294	2545	3e-53	208
XLOC_002939	NONGGOT010540.1	88.39	112	13	0	18	129	1061	950	1e-26	119
XLOC_002940	NONGGOT017667.1	89.69	97	10	0	657	753	845	749	1e-24	113
XLOC_002940	NONGGOT017667.1	89.69	97	10	0	571	667	845	749	9e-25	113
XLOC_002940	NONGGOT017667.1	89.69	97	10	0	657	753	845	749	1e-24	113
XLOC_002941	NONGGOT012347.1	88.57	70	8	0	588	657	2279	2348	2e-13	75.8
XLOC_002942	NONGGOT010939.1	95.83	120	5	0	354	473	11	130	1e-50	198
XLOC_002942	NONGGOT010939.1	94.56	147	8	0	312	458	11	157	2e-59	228
XLOC_002942	NONGGOT010939.1	94.48	145	8	0	304	448	11	155	3e-58	224
XLOC_002948	NONGGOT010956.1	92.76	359	21	4	3	358	127	483	8e-122	434
XLOC_002955	NONGGOT010979.1	99.26	135	1	0	1	135	1043	1177	6e-69	260
XLOC_002955	NONGGOT008860.1	89.42	104	11	0	323	426	259	156	2e-26	119
XLOC_002957	NONGGOT008673.1	93.75	32	2	0	76	107	12	43	1e-05	48.1
XLOC_002959	NONGGOT014565.1	87.5	64	8	0	1005	1068	1190	1253	1e-09	63.9
XLOC_002959	NONGGOT014565.1	87.5	64	8	0	642	705	1190	1253	6e-10	63.9
XLOC_002961	NONGGOT001413.1	93.75	48	3	0	1	48	837	884	1e-12	71.9
XLOC_002964	NONGGOT004062.1	87.5	112	13	1	712	823	883	993	1e-21	103
XLOC_002964	NONGGOT004062.1	87.5	112	13	1	904	1015	883	993	1e-21	103
XLOC_002965	NONGGOT011503.1	91.29	241	16	1	107	342	712	472	8e-85	311
XLOC_002967	NONGGOT005642.1	89.74	39	4	0	262	300	169	131	0.0002	46.1
XLOC_002968	NONGGOT013102.1	92.31	39	3	0	142	180	846	884	2e-07	54
XLOC_002971	NONGGOT012896.1	87.59	282	30	1	1674	1950	992	711	4e-75	281
XLOC_002972	NONGGOT012410.1	94.29	35	2	0	398	432	1096	1130	2e-06	54
XLOC_002972	NONGGOT012410.1	94.29	35	2	0	398	432	1096	1130	1e-06	54
XLOC_002972	NONGGOT004259.1	100	22	0	0	836	857	602	581	0.0007	44.1
XLOC_002972	NONGGOT004259.1	100	22	0	0	691	712	602	581	0.0006	44.1
XLOC_002972	NONGGOT004259.1	100	22	0	0	1119	1140	602	581	0.001	44.1
XLOC_002975	NONGGOT011004.1	92.56	524	28	3	197	711	1	522	0	686
XLOC_002979	NONGGOT003836.1	84.47	103	14	2	885	986	857	756	5e-09	61.9
XLOC_002980	NONGGOT019165.1	86.96	46	6	0	616	661	1134	1179	0.0006	44.1
XLOC_002980	NONGGOT012677.1	94.34	106	6	0	546	651	533	638	2e-39	163
XLOC_002981	NONGGOT008924.1	83.09	136	23	0	933	1068	954	1089	1e-16	87.7
XLOC_002981	NONGGOT008924.1	83.09	136	23	0	1132	1267	954	1089	1e-16	87.7
XLOC_002981	NONGGOT008924.1	83.09	136	23	0	1158	1293	954	1089	1e-16	87.7
XLOC_002984	NONGGOT014978.1	83.17	202	31	1	504	702	757	556	6e-29	127
XLOC_002987	NONGGOT011041.1	94.55	55	3	0	4	58	162	216	1e-16	85.7
XLOC_002998	NONGGOT018715.1	93.94	33	2	0	108	140	821	789	4e-06	50.1
XLOC_002999	NONGGOT020740.1	91.6	262	21	1	259	519	1764	2025	3e-92	337
XLOC_003002	NONGGOT011180.1	92.5	80	6	0	1747	1826	1143	1222	9e-24	111
XLOC_003002	NONGGOT011180.1	92.5	80	6	0	1861	1940	1143	1222	9e-24	111
XLOC_003003	NONGGOT011068.1	88.69	168	12	1	1	161	123	290	2e-47	186
XLOC_003004	NONGGOT011075.1	96.77	341	9	2	78	417	1	340	6e-151	531
XLOC_003004	NONGGOT011075.1	98.08	104	2	0	4	107	1	104	3e-48	190
XLOC_003004	NONGGOT011075.1	96.64	238	7	1	266	502	103	340	6e-99	359
XLOC_003006	NONGGOT007902.1	91.26	286	23	2	2862	3146	137	421	5e-79	295
XLOC_003006	NONGGOT007902.1	91.26	286	23	2	2427	2711	137	421	5e-79	295
XLOC_003006	NONGGOT011084.1	97.85	93	2	0	404	496	578	670	1e-41	168
XLOC_003006	NONGGOT007902.1	91.26	286	23	2	1690	1974	137	421	4e-79	295
XLOC_003006	NONGGOT011084.1	97.85	93	2	0	1203	1295	578	670	3e-41	168
XLOC_003006	NONGGOT007902.1	91.26	286	23	2	2020	2304	137	421	4e-79	295
XLOC_003006	NONGGOT007902.1	91.26	286	23	2	2423	2707	137	421	5e-79	295
XLOC_003006	NONGGOT007902.1	91.26	286	23	2	2043	2327	137	421	4e-79	295
XLOC_003006	NONGGOT007902.1	91.26	286	23	2	2011	2295	137	421	4e-79	295
XLOC_003006	NONGGOT001060.1	100	30	0	0	220	249	338	309	6e-09	60
XLOC_003011	NONGGOT004464.1	87.67	146	18	0	4	149	359	214	8e-35	147
XLOC_003011	NONGGOT004464.1	87.67	146	18	0	4	149	359	214	9e-35	147
XLOC_003011	NONGGOT020686.1	88.95	1059	112	5	1358	2413	2103	3159	0	1098
XLOC_003011	NONGGOT011604.1	96.55	232	8	0	1	232	273	42	4e-110	396
XLOC_003013	NONGGOT011106.1	96.13	155	6	0	358	512	593	747	4e-69	260
XLOC_003017	NONGGOT008022.1	87.8	82	10	0	136	217	30	111	7e-16	83.8
XLOC_003017	NONGGOT008022.1	87.8	82	10	0	136	217	30	111	7e-16	83.8
XLOC_003017	NONGGOT008022.1	87.8	82	10	0	135	216	30	111	4e-16	83.8
XLOC_003017	NONGGOT008022.1	87.8	82	10	0	118	199	30	111	5e-16	83.8
XLOC_003017	NONGGOT009794.1	96.55	29	1	0	230	258	742	714	7e-06	50.1
XLOC_003020	NONGGOT000556.1	86.39	169	23	0	533	701	504	672	1e-36	153
XLOC_003020	NONGGOT000556.1	86.39	169	23	0	474	642	504	672	1e-36	153
XLOC_003022	NONGGOT015444.1	88.41	138	16	0	482	619	1254	1391	6e-35	147
XLOC_003022	NONGGOT009838.1	89.81	216	22	0	726	941	1397	1612	5e-67	254
XLOC_003022	NONGGOT009838.1	89.81	216	22	0	586	801	1397	1612	4e-67	254
XLOC_003026	NONGGOT011647.1	91.28	298	18	3	1	290	13	310	5e-102	371
XLOC_003026	NONGGOT011647.1	91.52	283	16	3	2	276	28	310	3e-98	357
XLOC_003026	NONGGOT011647.1	91.42	338	18	5	11	339	128	463	3e-115	412
XLOC_003027	NONGGOT009284.1	82.81	192	30	2	777	965	55	246	3e-22	105
XLOC_003029	NONGGOT006266.1	82.79	122	20	1	249	369	947	1068	4e-11	67.9
XLOC_003030	NONGGOT014859.1	88.19	237	24	2	1339	1571	238	2	3e-61	236
XLOC_003032	NONGGOT011658.1	87.06	170	10	1	2	159	122	291	4e-44	176
XLOC_003032	NONGGOT011658.1	93.75	32	2	0	1	32	260	291	1e-05	48.1
XLOC_003034	NONGGOT009812.1	86.15	130	17	1	468	597	912	1040	5e-23	107
XLOC_003034	NONGGOT009812.1	86.15	130	17	1	499	628	912	1040	6e-23	107
XLOC_003036	NONGGOT008292.1	87.96	108	13	0	4	111	1486	1379	2e-24	111
XLOC_003037	NONGGOT006928.1	96.3	27	1	0	1298	1324	44	70	0.0003	46.1
XLOC_003038	NONGGOT011671.1	100	38	0	0	409	446	274	311	1e-13	75.8
XLOC_003038	NONGGOT016394.1	86.73	98	13	0	1544	1641	395	298	7e-18	91.7
XLOC_003038	NONGGOT016394.1	86.73	98	13	0	1299	1396	395	298	6e-18	91.7
XLOC_003038	NONGGOT011671.1	88.03	117	9	1	1	117	164	275	2e-27	121
XLOC_003038	NONGGOT011671.1	88.68	106	7	1	4	109	175	275	4e-25	115
XLOC_003038	NONGGOT011671.1	88.46	104	7	1	1	104	177	275	7e-24	111
XLOC_003038	NONGGOT016394.1	86.73	98	13	0	1280	1377	395	298	6e-18	91.7
XLOC_003041	NONGGOT015620.1	91.07	56	5	0	303	358	914	969	2e-12	71.9
XLOC_003042	NONGGOT012149.1	91.36	602	38	2	2540	3140	1349	761	0	789
XLOC_003042	NONGGOT012149.1	91.36	602	38	2	2510	3110	1349	761	0	789
XLOC_003042	NONGGOT012149.1	91.36	602	38	2	1736	2336	1349	761	0	789
XLOC_003042	NONGGOT012149.1	91.36	602	38	2	1646	2246	1349	761	0	789
XLOC_003042	NONGGOT012149.1	91.36	602	38	2	1525	2125	1349	761	0	789
XLOC_003045	NONGGOT006928.1	92.59	54	4	0	102	155	760	813	5e-14	75.8
XLOC_003047	NONGGOT008426.1	88.89	45	5	0	570	614	106	62	1e-05	50.1
XLOC_003047	NONGGOT008426.1	88.89	45	5	0	361	405	106	62	1e-05	50.1
XLOC_003048	NONGGOT001481.1	87.72	57	7	0	1492	1548	912	968	1e-07	58
XLOC_003049	NONGGOT011691.1	91.63	203	17	0	79	281	1	203	4e-71	268
XLOC_003049	NONGGOT011691.1	91.63	203	17	0	32	234	1	203	1e-71	268
XLOC_003049	NONGGOT011691.1	91.63	203	17	0	15	217	1	203	2e-71	268
XLOC_003050	NONGGOT018494.1	94.44	72	3	1	631	701	355	426	8e-22	103
XLOC_003050	NONGGOT018494.1	94.44	72	3	1	551	621	355	426	7e-22	103
XLOC_003052	NONGGOT008880.1	86.78	227	20	3	516	741	386	603	1e-51	202
XLOC_003054	NONGGOT000520.1	87.93	58	7	0	225	282	493	550	8e-09	60
XLOC_003056	NONGGOT020465.1	86.49	74	9	1	246	318	187	260	1e-08	60
XLOC_003056	NONGGOT020465.1	86.49	74	9	1	231	303	187	260	1e-08	60
XLOC_003057	NONGGOT011323.1	96.55	87	3	0	1	87	13	99	1e-35	149
XLOC_003057	NONGGOT020360.1	96.92	65	2	0	1	65	110	46	4e-25	113
XLOC_003063	NONGGOT002924.1	90.48	42	4	0	1455	1496	577	618	9e-06	52
XLOC_003063	NONGGOT014178.1	100	24	0	0	100	123	227	204	4e-05	48.1
XLOC_003068	NONGGOT016102.1	86.96	69	7	1	853	919	1589	1657	1e-08	60
XLOC_003069	NONGGOT020523.1	85.93	135	19	0	490	624	156	22	1e-25	117
XLOC_003069	NONGGOT020523.1	85.93	135	19	0	490	624	156	22	1e-25	117
XLOC_003069	NONGGOT008871.1	89.73	146	14	1	1785	1930	622	766	3e-39	163
XLOC_003069	NONGGOT011457.1	92.11	38	3	0	338	375	655	618	4e-06	52
XLOC_003069	NONGGOT011457.1	92.11	38	3	0	338	375	655	618	4e-06	52
XLOC_003070	NONGGOT011169.1	88.22	331	38	1	149	478	463	133	8e-93	339
XLOC_003070	NONGGOT011169.1	88.22	331	38	1	149	478	463	133	6e-93	339
XLOC_003071	NONGGOT011262.1	88.35	266	27	2	336	601	1234	1495	8e-72	270
XLOC_003072	NONGGOT013109.1	83.86	477	62	5	14	489	3560	4022	3e-85	315
XLOC_003072	NONGGOT006788.1	90	110	10	1	166	275	921	813	2e-27	123
XLOC_003072	NONGGOT010655.1	84.18	373	22	5	2960	3296	567	938	5e-79	295
XLOC_003072	NONGGOT010655.1	84.18	373	22	5	2764	3100	567	938	4e-79	295
XLOC_003072	NONGGOT011170.1	96.28	215	8	0	2996	3210	226	12	2e-99	363
XLOC_003072	NONGGOT010655.1	87.28	346	24	3	1	326	147	492	3e-95	347
XLOC_003072	NONGGOT010655.1	85.29	612	52	6	982	1557	567	1176	2e-145	515
XLOC_003072	NONGGOT011170.1	96.28	215	8	0	418	632	226	12	5e-100	363
XLOC_003072	NONGGOT011170.1	96.28	215	8	0	571	785	226	12	7e-100	363
XLOC_003073	NONGGOT010006.1	84.72	72	10	1	180	251	1082	1152	5e-05	48.1
XLOC_003073	NONGGOT010006.1	84.72	72	10	1	205	276	1082	1152	5e-05	48.1
XLOC_003073	NONGGOT020597.1	96	25	1	0	184	208	659	683	0.0007	42.1
XLOC_003079	NONGGOT009767.1	91.96	224	17	1	628	850	2859	3082	2e-78	293
XLOC_003080	NONGGOT000235.1	100	30	0	0	1	30	155	126	4e-09	60
XLOC_003084	NONGGOT011180.1	87.8	369	34	6	1329	1695	475	116	1e-91	337
XLOC_003087	NONGGOT010821.1	89.86	69	6	1	381	448	1022	954	1e-12	73.8
XLOC_003087	NONGGOT010821.1	89.86	69	6	1	381	448	1022	954	1e-12	73.8
XLOC_003089	NONGGOT011198.1	93.94	231	9	2	517	747	285	60	3e-92	337
XLOC_003089	NONGGOT011199.1	93.67	221	14	0	600	820	306	86	3e-89	327
XLOC_003089	NONGGOT011199.1	93	343	19	1	595	937	423	86	5e-138	490
XLOC_003089	NONGGOT011199.1	93	343	19	1	595	937	423	86	4e-138	490
XLOC_003089	NONGGOT011198.1	96.1	77	3	0	517	593	285	209	1e-29	129
XLOC_003089	NONGGOT011199.1	93.12	654	39	2	388	1040	734	86	0	932
XLOC_003091	NONGGOT014053.1	96.3	27	1	0	190	216	283	257	6e-05	46.1
XLOC_003093	NONGGOT009631.1	88.57	70	8	0	1272	1341	300	369	4e-13	75.8
XLOC_003096	NONGGOT011224.1	91.51	212	16	1	282	491	453	242	1e-72	272
XLOC_003096	NONGGOT011223.1	95.13	267	13	0	6	272	789	523	4e-119	426
XLOC_003100	NONGGOT011232.1	94.49	127	7	0	221	347	127	1	5e-50	196
XLOC_003101	NONGGOT002796.1	100	26	0	0	1676	1701	76	101	2e-05	52
XLOC_003101	NONGGOT002796.1	100	26	0	0	1676	1701	76	101	2e-05	52
XLOC_003101	NONGGOT002796.1	100	26	0	0	1676	1701	76	101	2e-05	52
XLOC_003101	NONGGOT002796.1	100	26	0	0	1676	1701	76	101	2e-05	52
XLOC_003101	NONGGOT002796.1	100	26	0	0	1676	1701	76	101	2e-05	52
XLOC_003101	NONGGOT002796.1	100	26	0	0	1676	1701	76	101	2e-05	52
XLOC_003101	NONGGOT002796.1	100	26	0	0	1676	1701	76	101	2e-05	52
XLOC_003101	NONGGOT002796.1	100	26	0	0	1676	1701	76	101	2e-05	52
XLOC_003102	NONGGOT014416.1	88.57	140	16	0	758	897	2661	2800	5e-36	151
XLOC_003102	NONGGOT014416.1	88.57	140	16	0	656	795	2661	2800	4e-36	151
XLOC_003103	NONGGOT003173.1	97.67	43	1	0	1796	1838	3	45	2e-13	77.8
XLOC_003103	NONGGOT012104.1	87.5	208	25	1	3227	3433	1098	1305	1e-49	198
XLOC_003104	NONGGOT020740.1	97.96	49	1	0	1	49	3573	3621	2e-17	89.7
XLOC_003104	NONGGOT020740.1	97.96	49	1	0	1	49	3573	3621	9e-18	89.7
XLOC_003104	NONGGOT013212.1	94.87	39	2	0	30	68	296	334	1e-09	61.9
XLOC_003107	NONGGOT001585.1	86.1	223	27	1	332	554	968	1186	3e-49	194
XLOC_003110	NONGGOT013732.1	91.43	35	3	0	248	282	123	157	0.0002	46.1
XLOC_003110	NONGGOT013732.1	91.43	35	3	0	248	282	123	157	0.0002	46.1
XLOC_003111	NONGGOT011295.1	95	80	4	0	4	83	251	172	2e-29	127
XLOC_003114	NONGGOT008590.1	91.89	37	3	0	4	40	79	115	1e-05	50.1
XLOC_003114	NONGGOT008590.1	91.89	37	3	0	4	40	79	115	1e-05	50.1
XLOC_003114	NONGGOT008590.1	91.89	37	3	0	4	40	79	115	1e-05	50.1
XLOC_003114	NONGGOT008590.1	91.89	37	3	0	4	40	79	115	2e-05	50.1
XLOC_003119	NONGGOT018715.1	84.71	85	13	0	510	594	409	493	2e-10	65.9
XLOC_003121	NONGGOT010793.1	91.94	62	5	0	577	638	175	236	7e-16	83.8
XLOC_003121	NONGGOT010793.1	91.94	62	5	0	219	280	175	236	4e-16	83.8
XLOC_003121	NONGGOT012483.1	91.89	111	9	0	188	298	399	289	1e-35	149
XLOC_003121	NONGGOT012483.1	91.89	111	9	0	188	298	399	289	1e-35	149
XLOC_003121	NONGGOT012483.1	91.89	111	9	0	188	298	399	289	2e-35	149
XLOC_003121	NONGGOT012483.1	91.89	111	9	0	188	298	399	289	2e-35	149
XLOC_003123	NONGGOT009754.1	84.98	213	24	1	47	259	1853	1649	2e-43	174
XLOC_003124	NONGGOT016299.1	88.1	269	32	0	1821	2089	521	789	3e-74	280
XLOC_003124	NONGGOT016299.1	88.1	269	32	0	1821	2089	521	789	3e-74	280
XLOC_003130	NONGGOT015728.1	88.33	60	7	0	216	275	29	88	1e-09	63.9
XLOC_003130	NONGGOT015728.1	88.33	60	7	0	269	328	29	88	1e-09	63.9
XLOC_003130	NONGGOT015728.1	88.33	60	7	0	260	319	29	88	1e-09	63.9
XLOC_003132	NONGGOT013031.1	91.53	59	5	0	176	234	351	293	2e-14	77.8
XLOC_003134	NONGGOT009264.1	84.9	245	20	4	2016	2260	542	315	3e-46	186
XLOC_003136	NONGGOT005583.1	96.15	26	1	0	177	202	1247	1222	0.001	44.1
XLOC_003138	NONGGOT009009.1	81.95	604	79	8	1735	2314	2059	2656	2e-84	313
XLOC_003138	NONGGOT009009.1	81.95	604	79	8	1735	2314	2059	2656	2e-84	313
XLOC_003138	NONGGOT015444.1	90.23	266	26	0	4984	5249	2997	3262	2e-86	321
XLOC_003139	NONGGOT002860.1	91.67	36	3	0	3433	3468	1217	1182	0.0002	48.1
XLOC_003139	NONGGOT002860.1	91.67	36	3	0	3527	3562	1217	1182	0.0002	48.1
XLOC_003139	NONGGOT014565.1	89.89	89	9	0	12	100	2285	2373	4e-22	105
XLOC_003140	NONGGOT020573.1	89.55	67	7	0	1	67	1545	1479	2e-14	77.8
XLOC_003144	NONGGOT015588.1	100	62	0	0	1	62	334	395	9e-28	123
XLOC_003147	NONGGOT000904.1	94.74	38	2	0	6	43	116	79	2e-08	60
XLOC_003149	NONGGOT003650.1	85.13	269	40	0	457	725	510	242	1e-55	216
XLOC_003150	NONGGOT011376.1	94.94	237	10	1	68	302	237	1	1e-101	369
XLOC_003150	NONGGOT011376.1	94.67	225	10	1	68	290	237	13	2e-94	345
XLOC_003150	NONGGOT011376.1	95.69	557	20	2	1092	1644	568	12	0	902
XLOC_003150	NONGGOT011376.1	96.65	448	13	1	1092	1537	568	121	0	763
XLOC_003150	NONGGOT011376.1	97.52	121	3	0	104	224	237	117	5e-56	216
XLOC_003153	NONGGOT011379.1	96.09	230	9	0	18	247	704	475	8e-107	385
XLOC_003154	NONGGOT006928.1	91.67	120	10	0	788	907	170	51	2e-38	159
XLOC_003156	NONGGOT020031.1	91.26	206	12	2	1013	1213	872	1076	7e-68	258
XLOC_003156	NONGGOT020031.1	91.26	206	12	2	1013	1213	872	1076	7e-68	258
XLOC_003158	NONGGOT016471.1	90.91	99	9	0	2482	2580	68	166	8e-28	125
XLOC_003158	NONGGOT016471.1	90.91	99	9	0	2546	2644	68	166	8e-28	125
XLOC_003159	NONGGOT007830.1	98.08	52	1	0	8	59	518	569	3e-19	95.6
XLOC_003159	NONGGOT007830.1	98.08	52	1	0	8	59	518	569	3e-19	95.6
XLOC_003161	NONGGOT009767.1	100	29	0	0	3	31	426	454	2e-08	58
XLOC_003162	NONGGOT018411.1	90.54	74	7	0	1	74	886	959	2e-18	91.7
XLOC_003163	NONGGOT016521.1	96.15	26	1	0	488	513	300	275	0.0008	44.1
XLOC_003164	NONGGOT001168.1	92.94	85	6	0	473	557	1223	1307	3e-27	121
XLOC_003166	NONGGOT010927.1	100	25	0	0	82	106	128	152	7e-06	50.1
XLOC_003169	NONGGOT011412.1	98.53	204	3	0	189	392	273	70	1e-105	381
XLOC_003170	NONGGOT004128.1	91.08	213	18	1	825	1037	1224	1013	2e-61	236
XLOC_003171	NONGGOT016494.1	92.96	71	5	0	467	537	193	123	3e-21	101
XLOC_003171	NONGGOT016494.1	92.96	71	5	0	467	537	193	123	4e-21	101
XLOC_003172	NONGGOT009376.1	88.69	221	23	2	1	220	513	294	4e-58	224
XLOC_003175	NONGGOT001492.1	92.04	113	9	0	1211	1323	530	418	3e-36	153
XLOC_003175	NONGGOT001492.1	92.04	113	9	0	1211	1323	530	418	4e-36	153
XLOC_003175	NONGGOT001492.1	92.04	113	9	0	1211	1323	530	418	4e-36	153
XLOC_003175	NONGGOT001492.1	92.04	113	9	0	1211	1323	530	418	4e-36	153
XLOC_003175	NONGGOT001492.1	92.04	113	9	0	1211	1323	530	418	4e-36	153
XLOC_003175	NONGGOT001492.1	92.04	113	9	0	1211	1323	530	418	4e-36	153
XLOC_003175	NONGGOT001492.1	92.04	113	9	0	1211	1323	530	418	3e-36	153
XLOC_003175	NONGGOT001492.1	92.04	113	9	0	1211	1323	530	418	4e-36	153
XLOC_003177	NONGGOT010032.1	89.8	49	5	0	547	595	1256	1208	6e-08	58
XLOC_003182	NONGGOT016299.1	93.47	245	12	2	2	243	534	777	2e-86	319
XLOC_003183	NONGGOT010959.1	90.67	150	13	1	771	920	105	253	2e-44	178
XLOC_003183	NONGGOT010959.1	90.67	150	13	1	503	652	105	253	2e-44	178
XLOC_003187	NONGGOT002208.1	84.86	251	37	1	1304	1554	303	54	8e-47	188
XLOC_003188	NONGGOT020595.1	96.43	28	1	0	2114	2141	584	611	0.0001	48.1
XLOC_003191	NONGGOT020001.1	87.01	154	18	1	59	210	201	48	5e-33	141
XLOC_003192	NONGGOT014589.1	89.73	185	18	1	1	185	799	616	2e-53	208
XLOC_003192	NONGGOT015661.1	82.35	119	21	0	46	164	397	279	2e-11	69.9
[truncated: 6,389 more rows]

## Sheet: Human
LncRNA	Human_LncRNA	Identity	Length	Mismatch	Gap	Q_start	Q_end	O_start	O_end	E-value	Score
XLOC_000001	NONHSAT199671.1	90.12	1083	105	1	101	1181	3310	4392	0	1292
XLOC_000001	NONHSAT199671.1	89.11	1368	127	2	30	1375	3025	4392	0	1554
XLOC_000002	NONHSAT164134.1	88.98	245	19	4	1305	1541	4956	5200	6e-64	248
XLOC_000002	NONHSAT164134.1	88.98	245	19	4	826	1062	4956	5200	5e-64	248
XLOC_000002	NONHSAT164134.1	88.98	245	19	4	787	1023	4956	5200	5e-64	248
XLOC_000002	NONHSAT164134.1	88.98	245	19	4	776	1012	4956	5200	5e-64	248
XLOC_000004	NONHSAT154639.1	85.39	89	7	1	1061	1149	3542	3624	5e-12	75.8
XLOC_000005	NONHSAT210177.1	96.67	30	1	0	485	514	3290	3261	2e-05	52
XLOC_000008	NONHSAT094596.2	93.1	87	6	0	114	200	119	205	6e-28	125
XLOC_000009	NONHSAT198150.1	97.73	484	10	1	5	488	928	446	0	864
XLOC_000010	NONHSAT094518.2	91.67	48	4	0	180	227	611	658	2e-09	63.9
XLOC_000011	NONHSAT148205.1	92.19	128	9	1	90	217	4234	4360	3e-40	167
XLOC_000013	NONHSAT189136.1	91.76	255	18	1	447	698	1737	1483	2e-90	335
XLOC_000015	NONHSAT000338.2	92.12	622	41	3	396	1017	267	880	0	785
XLOC_000015	NONHSAT000338.2	92.12	622	41	3	487	1108	267	880	0	785
XLOC_000015	NONHSAT000338.2	92.12	622	41	3	369	990	267	880	0	785
XLOC_000015	NONHSAT000338.2	92.12	622	41	3	665	1286	267	880	0	785
XLOC_000016	NONHSAT000371.2	86.47	473	31	4	189	638	95	557	7e-127	456
XLOC_000016	NONHSAT000371.2	89.51	324	31	2	946	1267	589	911	2e-97	359
XLOC_000017	NONHSAT150977.1	93.48	890	56	2	1	888	316	1205	0	1289
XLOC_000017	NONHSAT150977.1	94.35	513	28	1	141	652	437	949	0	779
XLOC_000018	NONHSAT148241.1	93.16	380	25	1	117	495	265	644	5e-152	539
XLOC_000018	NONHSAT148241.1	93.01	386	26	1	17	401	259	644	3e-153	543
XLOC_000018	NONHSAT148241.1	92.99	385	26	1	15	398	260	644	1e-152	541
XLOC_000018	NONHSAT148241.1	92.48	412	29	2	87	496	233	644	8e-157	555
XLOC_000020	NONHSAT105129.2	91.03	435	38	1	59	493	731	298	5e-154	545
XLOC_000022	NONHSAT000567.2	92.27	220	13	2	33	248	70	289	9e-77	289
XLOC_000022	NONHSAT000567.2	92.12	241	15	2	7	243	49	289	2e-84	315
XLOC_000022	NONHSAT000567.2	92.27	220	13	2	20	235	70	289	9e-77	289
XLOC_000023	NONHSAT148260.1	91.27	332	24	3	1862	2191	390	718	5e-112	408
XLOC_000023	NONHSAT148260.1	90.94	309	23	3	1316	1622	413	718	8e-101	371
XLOC_000023	NONHSAT148260.1	95.77	71	3	0	39	109	167	237	4e-25	117
XLOC_000023	NONHSAT148260.1	97.37	38	1	0	1	38	199	236	2e-10	67.9
XLOC_000023	NONHSAT148260.1	91.27	332	24	3	352	681	390	718	3e-112	408
XLOC_000023	NONHSAT148260.1	91.27	332	24	3	202	531	390	718	2e-112	408
XLOC_000024	NONHSAT148260.1	97.83	46	1	0	112	157	2087	2132	6e-15	83.8
XLOC_000024	NONHSAT148260.1	89.39	132	14	0	1	132	739	870	3e-35	151
XLOC_000025	NONHSAT201332.1	82.72	1684	211	18	3417	5042	11591	13252	0	969
XLOC_000026	NONHSAT188553.1	96.77	31	1	0	1181	1211	4185	4215	3e-05	54
XLOC_000026	NONHSAT188553.1	96.77	31	1	0	439	469	4185	4215	2e-05	54
XLOC_000027	NONHSAT000628.2	92.34	418	32	0	1	418	418	1	9e-163	575
XLOC_000029	NONHSAT148314.1	99.64	275	1	0	56	330	2	276	2e-151	537
XLOC_000029	NONHSAT148314.1	99.64	276	1	0	115	390	1	276	5e-152	539
XLOC_000029	NONHSAT148314.1	99.64	275	1	0	28	302	2	276	2e-151	537
XLOC_000030	NONHSAT151064.1	96.75	431	14	0	357	787	431	1	0	743
XLOC_000031	NONHSAT141159.2	89.96	239	24	0	113	351	3379	3141	8e-75	283
XLOC_000033	NONHSAT000740.2	94.12	204	11	1	247	450	1	203	2e-80	301
XLOC_000033	NONHSAT148325.1	93.94	198	11	1	1	198	7	203	2e-76	289
XLOC_000034	NONHSAT000741.2	89.92	129	12	1	83	210	129	1	7e-34	145
XLOC_000035	NONHSAT220676.1	88.1	84	10	0	1232	1315	3072	2989	1e-15	87.7
XLOC_000035	NONHSAT220676.1	88.1	84	10	0	1380	1463	3072	2989	1e-15	87.7
XLOC_000035	NONHSAT220676.1	88.1	84	10	0	1302	1385	3072	2989	1e-15	87.7
XLOC_000035	NONHSAT220676.1	88.1	84	10	0	1303	1386	3072	2989	1e-15	87.7
XLOC_000035	NONHSAT220676.1	88.1	84	10	0	773	856	3072	2989	7e-16	87.7
XLOC_000035	NONHSAT220676.1	88.1	84	10	0	712	795	3072	2989	6e-16	87.7
XLOC_000035	NONHSAT220676.1	88.1	84	10	0	744	827	3072	2989	6e-16	87.7
XLOC_000036	NONHSAT000861.2	98.28	58	1	0	274	331	1	58	3e-22	107
XLOC_000036	NONHSAT148356.1	93.71	525	20	2	321	833	67	590	0	785
XLOC_000036	NONHSAT148356.1	93.71	525	20	2	440	952	67	590	0	785
XLOC_000036	NONHSAT148356.1	94.24	573	20	2	216	776	19	590	0	880
XLOC_000037	NONHSAT148374.1	95.66	622	22	3	381	997	28	649	0	999
XLOC_000038	NONHSAT148380.1	94.32	88	5	0	192	279	60	147	1e-30	135
XLOC_000038	NONHSAT148380.1	94.32	88	5	0	187	274	60	147	9e-31	135
XLOC_000038	NONHSAT148380.1	94.44	90	5	0	177	266	60	149	1e-31	139
XLOC_000039	NONHSAT148395.1	95.08	386	18	1	1	386	100	484	1e-172	607
XLOC_000039	NONHSAT148395.1	90.91	396	18	2	1	396	107	484	3e-145	515
XLOC_000039	NONHSAT148395.1	95.57	271	8	1	1	267	214	484	1e-122	440
XLOC_000039	NONHSAT148395.1	90.43	230	5	1	76	305	272	484	4e-82	305
XLOC_000039	NONHSAT148395.1	97.65	213	5	0	76	288	272	484	2e-105	383
XLOC_000039	NONHSAT148395.1	97.67	215	5	0	53	267	270	484	1e-106	387
XLOC_000042	NONHSAT000976.2	97.33	75	2	0	169	243	373	447	3e-30	133
XLOC_000045	NONHSAT148497.1	91.47	387	31	2	23	408	186	571	3e-137	490
XLOC_000045	NONHSAT148497.1	91.47	387	31	2	23	408	186	571	4e-137	490
XLOC_000045	NONHSAT148497.1	92.39	92	7	0	1	92	480	571	3e-28	127
XLOC_000045	NONHSAT148497.1	92.39	92	7	0	1	92	480	571	3e-28	127
XLOC_000045	NONHSAT152189.1	87.62	307	26	3	111	406	2304	2609	3e-80	301
XLOC_000045	NONHSAT152189.1	91.32	242	20	1	49	289	2687	2928	1e-62	242
XLOC_000045	NONHSAT152189.1	91.18	238	20	1	1	237	2691	2928	3e-60	234
XLOC_000046	NONHSAT006164.2	90.21	235	21	2	380	614	604	836	5e-70	268
XLOC_000046	NONHSAT148497.1	91.55	71	6	0	454	524	820	890	6e-18	93.7
XLOC_000047	NONHSAT001142.2	88.5	226	24	2	1	225	665	889	8e-58	226
XLOC_000047	NONHSAT006459.2	85.44	316	43	2	293	606	184	498	2e-64	248
XLOC_000047	NONHSAT006459.2	85.44	316	43	2	401	714	184	498	3e-64	248
XLOC_000049	NONHSAT151192.1	93.75	128	8	0	66	193	182	55	1e-47	190
XLOC_000051	NONHSAT001257.2	94.37	71	4	0	40	110	72	2	7e-23	109
XLOC_000052	NONHSAT148467.1	93.89	393	22	2	1819	2210	1	392	2e-161	573
XLOC_000053	NONHSAT001281.2	93.09	362	16	2	96	456	554	907	1e-145	517
XLOC_000056	NONHSAT175594.1	85.55	353	49	2	390	741	686	1037	7e-74	280
XLOC_000057	NONHSAT162152.1	90.49	263	21	2	433	694	1029	1288	4e-76	287
XLOC_000057	NONHSAT162152.1	90.49	263	21	2	1878	2139	1029	1288	9e-76	287
XLOC_000058	NONHSAT148510.1	94.5	218	11	1	36	253	99	315	3e-89	329
XLOC_000060	NONHSAT183413.1	93.26	89	6	0	135	223	1327	1415	4e-29	129
XLOC_000061	NONHSAT001537.2	93.49	169	8	1	344	512	233	398	3e-63	244
XLOC_000061	NONHSAT001537.2	93.49	169	8	1	143	311	233	398	2e-63	244
XLOC_000062	NONHSAT203483.1	90.83	109	6	1	1178	1282	1900	1792	4e-30	135
XLOC_000063	NONHSAT001585.2	97.06	34	1	0	129	162	46	13	2e-07	60
XLOC_000063	NONHSAT001585.2	95.65	46	2	0	74	119	46	1	1e-12	75.8
XLOC_000064	NONHSAT148535.1	95.49	133	5	1	23	155	157	288	2e-52	208
XLOC_000065	NONHSAT148560.1	93.26	193	13	0	643	835	158	350	8e-74	280
XLOC_000067	NONHSAT148567.1	100	51	0	0	399	449	184	234	2e-20	101
XLOC_000068	NONHSAT001863.2	94.34	53	3	0	113	165	26	78	1e-14	81.8
XLOC_000068	NONHSAT001863.2	94.34	53	3	0	90	142	26	78	1e-14	81.8
XLOC_000068	NONHSAT128126.2	86.94	268	32	1	99	363	522	255	4e-65	250
XLOC_000069	NONHSAT001863.2	88.24	102	3	1	1	102	125	217	7e-25	115
XLOC_000070	NONHSAT153522.1	98.8	167	2	0	140	306	421	587	5e-85	315
XLOC_000071	NONHSAT223537.1	91.3	184	13	1	1	184	446	266	3e-60	234
XLOC_000072	NONHSAT148598.1	94.63	968	49	2	274	1238	20	987	0	1411
XLOC_000073	NONHSAT211573.1	93.08	260	17	1	4342	4600	1711	1452	9e-99	365
XLOC_000073	NONHSAT002007.2	95.42	153	5	1	90	240	758	910	1e-62	242
XLOC_000073	NONHSAT002007.2	95.42	153	5	1	90	240	758	910	2e-62	242
XLOC_000073	NONHSAT002007.2	95.42	153	5	1	90	240	758	910	8e-63	242
XLOC_000073	NONHSAT002008.2	93.92	181	11	0	946	1126	66	246	3e-71	272
XLOC_000075	NONHSAT002153.2	95.38	693	24	4	835	1522	617	1306	0	1096
XLOC_000075	NONHSAT002153.2	95.38	693	24	4	182	869	617	1306	0	1096
XLOC_000075	NONHSAT002153.2	95.38	693	24	4	13	700	617	1306	0	1096
XLOC_000077	NONHSAT153557.1	95.43	569	25	1	8	575	1370	1938	0	914
XLOC_000078	NONHSAT002201.2	87.38	206	17	1	230	426	8690	8895	3e-53	210
XLOC_000078	NONHSAT002201.2	87.38	206	17	1	157	353	8690	8895	2e-53	210
XLOC_000082	NONHSAT002382.2	96.32	1223	40	2	790	2008	373	1594	0	1957
XLOC_000083	NONHSAT002390.2	94.56	1103	49	6	747	1842	1	1099	0	1673
XLOC_000083	NONHSAT002390.2	94.8	789	36	2	747	1531	1	788	0	1229
XLOC_000084	NONHSAT148714.1	96.12	232	4	1	1	227	62	293	4e-107	389
XLOC_000086	NONHSAT002497.2	93.73	319	17	1	1	316	172	490	2e-131	470
XLOC_000086	NONHSAT002497.2	93.71	318	17	1	1	315	173	490	1e-130	468
XLOC_000086	NONHSAT002498.2	94.95	198	7	1	311	505	189	386	8e-83	309
XLOC_000086	NONHSAT002498.2	94.51	237	10	1	1	234	150	386	1e-98	363
XLOC_000086	NONHSAT002498.2	94.49	236	10	1	1	233	151	386	2e-98	361
XLOC_000086	NONHSAT002498.2	95.02	201	7	1	21	218	186	386	2e-84	315
XLOC_000086	NONHSAT002498.2	95.34	193	6	1	46	235	194	386	9e-83	307
XLOC_000087	NONHSAT148756.1	93.29	566	35	2	57	620	1	565	0	807
XLOC_000087	NONHSAT148756.1	93.29	566	35	2	70	633	1	565	0	807
XLOC_000087	NONHSAT148756.1	93.29	566	35	2	224	787	1	565	0	807
XLOC_000087	NONHSAT148756.1	93.29	566	35	2	258	821	1	565	0	807
XLOC_000089	NONHSAT002525.2	95	240	11	1	85	324	3	241	6e-102	373
XLOC_000089	NONHSAT002525.2	95	240	11	1	85	324	3	241	4e-102	373
XLOC_000089	NONHSAT158376.1	88.58	254	28	1	1	254	2099	1847	1e-69	266
XLOC_000091	NONHSAT002600.2	91.79	536	36	4	28	558	612	1144	0	690
XLOC_000094	NONHSAT002655.2	97.81	137	2	1	2454	2590	547	412	2e-61	240
XLOC_000094	NONHSAT148798.1	95.08	244	4	2	168	406	1	241	5e-105	385
XLOC_000094	NONHSAT002655.2	97.81	137	2	1	2127	2263	547	412	2e-61	240
XLOC_000095	NONHSAT174971.1	84.71	85	13	0	25	109	2355	2271	8e-10	65.9
XLOC_000101	NONHSAT027612.2	100	42	0	0	558	599	497	456	6e-15	83.8
XLOC_000103	NONHSAT148828.1	97.05	474	11	1	4	474	56	529	0	825
XLOC_000104	NONHSAT210966.1	96.36	55	2	0	3	57	99	45	1e-17	93.7
XLOC_000104	NONHSAT148828.1	93.71	334	21	0	847	1180	692	1025	1e-138	496
XLOC_000104	NONHSAT148828.1	93.45	351	21	1	77	425	675	1025	1e-142	507
XLOC_000107	NONHSAT072850.2	85.59	229	30	2	59	286	140	366	9e-44	178
XLOC_000107	NONHSAT072850.2	95.65	46	2	0	39	84	140	185	7e-13	75.8
XLOC_000108	NONHSAT002785.2	99.23	130	1	0	124	253	355	226	8e-65	250
XLOC_000109	NONHSAT193909.1	94.87	39	2	0	1	39	5033	5071	2e-08	61.9
XLOC_000112	NONHSAT095106.2	91.53	118	8	1	31	146	2796	2679	3e-34	149
XLOC_000114	NONHSAT191509.1	94.34	53	2	1	476	527	446	498	6e-12	73.8
XLOC_000114	NONHSAT170013.1	100	25	0	0	217	241	1576	1600	7e-05	50.1
XLOC_000115	NONHSAT148892.1	93.68	253	16	0	245	497	257	509	1e-102	375
XLOC_000115	NONHSAT148892.1	90	350	19	1	1	334	160	509	5e-122	438
XLOC_000115	NONHSAT148892.1	93.65	252	16	0	227	478	258	509	4e-102	373
XLOC_000115	NONHSAT148894.1	94.64	280	13	1	82	359	1	280	3e-119	430
XLOC_000116	NONHSAT166678.1	92.86	42	3	0	1	42	296	255	3e-08	60
XLOC_000117	NONHSAT003167.2	93.87	163	10	0	483	645	112	274	6e-63	244
XLOC_000117	NONHSAT003167.2	93.87	163	10	0	483	645	112	274	5e-63	244
XLOC_000117	NONHSAT003167.2	94.84	213	11	0	1	213	62	274	1e-90	335
XLOC_000117	NONHSAT003166.2	93.45	168	11	0	281	448	248	415	1e-63	246
XLOC_000118	NONHSAT003176.2	95.55	494	22	0	220	713	1	494	0	805
XLOC_000118	NONHSAT003179.2	94.57	276	15	0	138	413	818	1093	6e-119	428
XLOC_000119	NONHSAT179440.1	100	24	0	0	130	153	2054	2077	0.0002	48.1
XLOC_000120	NONHSAT054870.2	89.11	101	11	0	432	532	2070	2170	9e-24	113
XLOC_000121	NONHSAT219994.1	89.47	95	9	1	234	328	2335	2242	2e-20	101
XLOC_000122	NONHSAT148951.1	95.52	290	7	1	3	292	47	330	3e-132	474
XLOC_000122	NONHSAT056851.2	88.33	60	7	0	293	352	275	216	9e-09	63.9
XLOC_000126	NONHSAT003313.2	96.2	79	3	0	903	981	130	208	1e-29	133
XLOC_000126	NONHSAT214249.1	93.45	168	11	0	777	944	1079	912	1e-63	246
XLOC_000127	NONHSAT148969.1	93.01	143	10	0	4	146	132	274	9e-52	204
XLOC_000128	NONHSAT213787.1	100	25	0	0	155	179	1385	1361	0.0002	50.1
XLOC_000129	NONHSAT188785.1	88.33	257	27	2	66	321	1951	2205	3e-67	258
XLOC_000132	NONHSAT149020.1	94.53	128	4	1	13	140	1950	2074	1e-48	194
XLOC_000138	NONHSAT149076.1	95.32	171	8	0	64	234	1	171	5e-73	276
XLOC_000139	NONHSAT149101.1	93.09	188	10	2	300	487	1	185	8e-67	256
XLOC_000142	NONHSAT003785.2	93.15	73	5	0	1	73	530	602	5e-22	105
XLOC_000145	NONHSAT153773.1	95.93	246	10	0	206	451	93	338	7e-113	408
XLOC_000145	NONHSAT149182.1	92.31	117	9	0	19	135	1	117	3e-38	161
XLOC_000145	NONHSAT149182.1	92.31	117	9	0	19	135	1	117	3e-38	161
XLOC_000145	NONHSAT149182.1	92.31	117	9	0	19	135	1	117	4e-38	161
XLOC_000145	NONHSAT153787.1	92.09	531	31	3	1	521	1297	1826	5e-179	628
XLOC_000145	NONHSAT149185.1	94.12	34	2	0	70	103	467	500	1e-05	52
XLOC_000146	NONHSAT149208.1	94.09	186	6	1	10	195	1	181	1e-74	281
XLOC_000146	NONHSAT149208.1	94.05	185	6	1	8	192	1	180	4e-74	280
XLOC_000148	NONHSAT149227.1	95.92	49	2	0	74	122	72	120	1e-14	81.8
XLOC_000148	NONHSAT214219.1	85	220	28	3	3986	4204	3548	3333	2e-35	155
XLOC_000148	NONHSAT004022.2	95.11	348	17	0	121	468	264	611	8e-157	555
XLOC_000148	NONHSAT004022.2	93.08	347	23	1	219	565	622	967	3e-137	490
XLOC_000148	NONHSAT004022.2	93.85	130	8	0	27	156	264	393	3e-47	194
XLOC_000149	NONHSAT004062.2	93.77	321	18	1	1	321	207	525	4e-132	472
XLOC_000151	NONHSAT149235.1	90.3	268	26	0	1	268	199	466	6e-88	325
XLOC_000152	NONHSAT149258.1	94.51	237	13	0	1	237	278	514	1e-100	367
XLOC_000152	NONHSAT149258.1	94.67	150	8	0	2	151	364	513	4e-60	234
XLOC_000152	NONHSAT149261.1	94.25	87	5	0	329	415	110	196	5e-30	133
XLOC_000152	NONHSAT149261.1	98.36	61	1	0	253	313	317	377	4e-24	113
XLOC_000152	NONHSAT183033.1	96.55	29	1	0	274	302	7426	7398	6e-05	50.1
XLOC_000153	NONHSAT004168.2	97.89	473	10	0	1	473	172	644	0	817
XLOC_000153	NONHSAT149268.1	98.65	296	4	0	63	358	348	643	3e-144	513
XLOC_000154	NONHSAT004171.2	93.2	721	43	5	1	717	1153	435	0	922
XLOC_000154	NONHSAT004171.2	93.54	557	32	3	2	554	991	435	0	763
XLOC_000155	NONHSAT181487.1	92.11	38	3	0	1621	1658	229	266	7e-05	52
XLOC_000156	NONHSAT004212.2	98.84	172	2	0	135	306	112	283	1e-87	325
XLOC_000158	NONHSAT216019.1	92.31	78	6	0	350	427	3946	4023	3e-22	107
XLOC_000158	NONHSAT216019.1	92.31	78	6	0	277	354	3946	4023	3e-22	107
XLOC_000158	NONHSAT216019.1	92.31	78	6	0	383	460	3946	4023	3e-22	107
XLOC_000159	NONHSAT177225.1	96.3	27	1	0	186	212	350	324	0.0005	46.1
XLOC_000163	NONHSAT149299.1	98.15	162	3	0	1	162	16	177	8e-80	297
XLOC_000164	NONHSAT194116.1	96.67	30	1	0	516	545	787	758	2e-05	52
XLOC_000164	NONHSAT194116.1	96.67	30	1	0	673	702	787	758	3e-05	52
XLOC_000164	NONHSAT153889.1	96.77	93	3	0	470	562	163	255	4e-38	161
XLOC_000165	NONHSAT004319.2	95.1	102	4	1	1	101	231	332	8e-37	155
XLOC_000166	NONHSAT044001.2	93.49	169	11	0	1	169	459	627	4e-64	248
XLOC_000166	NONHSAT149317.1	96.38	138	2	1	176	313	1414	1548	9e-59	230
XLOC_000166	NONHSAT149317.1	96.38	138	2	1	174	311	1414	1548	3e-59	230
XLOC_000166	NONHSAT149317.1	96.38	138	2	1	174	311	1414	1548	3e-59	230
XLOC_000166	NONHSAT149318.1	96.35	137	2	1	174	310	115	248	3e-58	228
XLOC_000166	NONHSAT149319.1	93.71	175	11	0	577	751	205	379	6e-68	260
XLOC_000166	NONHSAT149319.1	93.71	175	11	0	296	470	205	379	4e-68	260
XLOC_000166	NONHSAT011873.2	90.25	236	23	0	1	236	1278	1513	4e-55	216
XLOC_000166	NONHSAT149319.1	93.71	175	11	0	762	936	205	379	8e-68	260
XLOC_000166	NONHSAT149320.1	94.44	36	2	0	1	36	182	217	2e-06	56
XLOC_000167	NONHSAT149318.1	93.91	115	7	0	50	164	540	654	9e-42	172
XLOC_000169	NONHSAT151902.1	92.74	413	30	0	3571	3983	1127	715	7e-164	581
XLOC_000169	NONHSAT151902.1	92.74	413	30	0	3603	4015	1127	715	7e-164	581
XLOC_000170	NONHSAT149331.1	94.32	352	20	0	372	723	67	418	4e-152	539
XLOC_000171	NONHSAT149353.1	100	37	0	0	349	385	745	781	4e-12	73.8
XLOC_000174	NONHSAT213682.1	100	23	0	0	142	164	201	179	0.0004	46.1
XLOC_000176	NONHSAT004661.2	95.69	209	9	0	143	351	7	215	2e-93	343
XLOC_000177	NONHSAT149400.1	99.01	202	2	0	78	279	113	314	6e-106	385
XLOC_000177	NONHSAT004676.2	93.52	880	53	2	219	1098	1	876	0	1221
XLOC_000177	NONHSAT149400.1	99.02	205	2	0	25	229	113	317	4e-107	391
XLOC_000177	NONHSAT149400.1	99.02	205	2	0	11	215	113	317	4e-107	391
XLOC_000177	NONHSAT149400.1	99.01	203	2	0	10	212	113	315	5e-106	387
XLOC_000177	NONHSAT149401.1	96.97	33	1	0	1	33	56	88	7e-07	58
XLOC_000179	NONHSAT149400.1	96.52	230	8	0	1	230	2063	2292	5e-108	392
XLOC_000180	NONHSAT004706.2	98.09	262	5	0	1	262	82	343	1e-134	480
XLOC_000180	NONHSAT004704.2	97.78	45	1	0	1	45	350	394	1e-14	81.8
XLOC_000181	NONHSAT198405.1	96.67	30	1	0	748	777	5925	5954	3e-05	52
XLOC_000182	NONHSAT004819.2	96.43	168	6	0	268	435	468	635	6e-76	285
XLOC_000182	NONHSAT149467.1	94.75	419	19	1	238	656	2749	3164	0	652
XLOC_000182	NONHSAT004822.2	94.12	442	23	1	59	500	1	439	0	666
XLOC_000182	NONHSAT004816.2	94.68	677	30	3	1	677	531	1201	0	1039
XLOC_000182	NONHSAT004818.2	94.75	419	19	1	53	471	1606	2021	0	652
XLOC_000182	NONHSAT149467.1	94.75	419	19	1	248	666	2749	3164	0	652
XLOC_000183	NONHSAT004845.2	93.29	164	11	0	155	318	318	481	3e-61	238
XLOC_000183	NONHSAT004845.2	93.29	164	11	0	109	272	318	481	1e-61	238
XLOC_000183	NONHSAT004845.2	93.29	164	11	0	109	272	318	481	3e-61	238
XLOC_000183	NONHSAT004844.2	97.01	67	2	0	266	332	566	632	7e-25	117
XLOC_000185	NONHSAT222411.1	82.37	312	54	1	314	625	600	290	3e-42	174
XLOC_000185	NONHSAT102994.2	84.79	355	53	1	30	383	387	741	3e-60	234
XLOC_000185	NONHSAT102994.2	84.69	320	48	1	29	347	387	706	3e-51	204
XLOC_000185	NONHSAT222411.1	82.37	312	54	1	132	443	600	290	2e-42	174
XLOC_000186	NONHSAT052275.2	82.38	244	43	0	28	271	345	588	4e-33	143
XLOC_000187	NONHSAT220272.1	96.97	33	1	0	343	375	347	315	2e-07	58
XLOC_000188	NONHSAT214030.1	100	27	0	0	17	43	961	987	2e-06	54
XLOC_000189	NONHSAT004978.2	93.35	451	25	3	1	447	251	700	0	636
XLOC_000190	NONHSAT004989.2	92.88	267	13	4	722	982	288	554	4e-95	351
XLOC_000191	NONHSAT155173.1	91.23	57	5	0	571	627	1496	1440	8e-12	73.8
XLOC_000193	NONHSAT154027.1	94.44	288	15	1	438	724	277	564	4e-121	436
XLOC_000193	NONHSAT154027.1	94.44	288	15	1	611	897	277	564	6e-121	436
XLOC_000194	NONHSAT154027.1	93.2	338	22	1	12	348	1110	1447	6e-134	480
XLOC_000194	NONHSAT154027.1	93.2	338	22	1	12	348	1110	1447	8e-134	480
XLOC_000194	NONHSAT210734.1	100	25	0	0	554	578	1493	1517	0.0001	50.1
XLOC_000195	NONHSAT133323.2	100	30	0	0	518	547	1913	1942	8e-08	60
XLOC_000196	NONHSAT149538.1	93.44	610	40	0	5	614	490	1099	0	892
XLOC_000199	NONHSAT005111.2	98.42	505	8	0	1	505	456	960	0	938
XLOC_000200	NONHSAT154036.1	96.89	322	10	0	1	322	1450	1771	2e-158	559
XLOC_000200	NONHSAT149585.1	94.6	685	30	5	411	1093	1154	1833	0	993
XLOC_000200	NONHSAT154036.1	97.46	197	5	0	1	197	1573	1769	6e-96	351
XLOC_000200	NONHSAT149587.1	94.88	215	10	1	177	390	560	774	2e-89	331
XLOC_000200	NONHSAT149585.1	94.99	859	35	6	163	1018	980	1833	0	1283
XLOC_000200	NONHSAT149585.1	94.6	685	30	5	547	1229	1154	1833	0	993
XLOC_000200	NONHSAT149585.1	94.6	685	30	5	240	922	1154	1833	0	993
XLOC_000200	NONHSAT149585.1	94.6	685	30	5	305	987	1154	1833	0	993
XLOC_000200	NONHSAT149585.1	94.6	685	30	5	377	1059	1154	1833	0	993
XLOC_000200	NONHSAT149587.1	94.88	215	10	1	79	292	560	774	1e-89	331
XLOC_000203	NONHSAT005201.2	94.86	292	15	0	1	292	102	393	2e-128	460
XLOC_000204	NONHSAT005220.2	97.92	96	2	0	402	497	1	96	5e-42	174
XLOC_000204	NONHSAT005220.2	97.92	96	2	0	380	475	1	96	2e-42	174
XLOC_000204	NONHSAT005220.2	97.94	97	2	0	354	450	1	97	4e-43	176
XLOC_000204	NONHSAT005220.2	97.92	96	2	0	323	418	1	96	2e-42	174
XLOC_000204	NONHSAT005220.2	98.31	59	1	0	1	59	24	82	2e-22	109
XLOC_000204	NONHSAT149603.1	100	26	0	0	1	26	626	651	3e-05	52
XLOC_000204	NONHSAT005222.2	95	40	2	0	1	40	142	181	8e-09	63.9
XLOC_000205	NONHSAT172698.1	93.33	225	15	0	875	1099	717	493	8e-88	327
XLOC_000205	NONHSAT005307.2	95	280	14	0	1662	1941	280	1	6e-123	444
XLOC_000206	NONHSAT127941.2	91.71	193	15	1	49	240	366	174	2e-64	248
XLOC_000207	NONHSAT059251.2	93.55	248	16	0	26	273	1046	1293	8e-87	323
XLOC_000208	NONHSAT005312.2	90.1	192	18	1	20	210	95	286	6e-57	222
XLOC_000209	NONHSAT149626.1	92.98	171	10	1	149	317	213	383	1e-61	238
XLOC_000209	NONHSAT149626.1	95.04	141	5	2	1	140	23	162	7e-53	208
XLOC_000211	NONHSAT172211.1	97.22	36	1	0	258	293	1074	1039	4e-09	63.9
XLOC_000215	NONHSAT001193.2	92.31	247	8	2	108	354	1434	1199	9e-93	341
XLOC_000216	NONHSAT001189.2	93.31	314	19	2	88	400	74	386	3e-122	440
XLOC_000216	NONHSAT001186.2	98.32	179	3	0	703	881	548	726	3e-89	331
XLOC_000217	NONHSAT148498.1	92.35	196	10	2	319	513	624	815	5e-68	260
XLOC_000219	NONHSAT006059.2	94.01	284	17	0	27	310	1166	1449	5e-119	428
XLOC_000219	NONHSAT006059.2	94.02	368	20	1	1	366	1082	1449	2e-155	549
XLOC_000219	NONHSAT006059.2	93.99	366	20	1	1	364	1084	1449	4e-154	545
XLOC_000220	NONHSAT006136.2	94.05	185	11	0	309	493	33	217	4e-74	280
XLOC_000221	NONHSAT005828.2	88.61	158	11	1	79	236	265	415	4e-42	174
XLOC_000221	NONHSAT005828.2	88.61	158	11	1	78	235	265	415	1e-42	174
XLOC_000221	NONHSAT005828.2	88.61	158	11	1	70	227	265	415	3e-42	174
XLOC_000221	NONHSAT005828.2	88.61	158	11	1	67	224	265	415	2e-42	174
XLOC_000221	NONHSAT006164.2	94.34	53	3	0	1	53	549	601	3e-14	81.8
XLOC_000221	NONHSAT006164.2	94.34	53	3	0	1	53	549	601	1e-14	81.8
XLOC_000221	NONHSAT005828.2	88.61	158	11	1	36	193	265	415	3e-42	174
XLOC_000221	NONHSAT005828.2	90	60	6	0	9	68	356	415	3e-11	71.9
XLOC_000222	NONHSAT154111.1	94.72	360	19	0	39	398	381	22	3e-159	563
XLOC_000223	NONHSAT001411.2	90.91	44	4	0	274	317	248	291	7e-07	56
XLOC_000224	NONHSAT006001.2	91.92	965	60	5	143	1103	1	951	0	1263
XLOC_000224	NONHSAT006001.2	91.75	800	52	4	30	825	1	790	0	1033
XLOC_000224	NONHSAT149730.1	93.44	701	36	7	86	783	3	696	0	975
XLOC_000225	NONHSAT149732.1	93.04	345	24	0	944	1288	79	423	4e-138	494
XLOC_000225	NONHSAT149732.1	93.48	368	24	0	208	575	56	423	3e-152	539
XLOC_000226	NONHSAT149743.1	91.38	58	4	1	1	58	468	524	3e-10	67.9
XLOC_000227	NONHSAT006063.2	88.04	627	54	5	27	650	978	1586	0	640
XLOC_000228	NONHSAT149724.1	89.77	88	6	1	351	435	584	497	2e-19	99.6
XLOC_000229	NONHSAT149770.1	92.72	591	31	4	65	644	1	590	0	815
XLOC_000229	NONHSAT149770.1	93.23	591	31	3	59	641	1	590	0	842
XLOC_000230	NONHSAT001219.2	88.36	438	47	2	187	624	508	75	7e-126	452
XLOC_000231	NONHSAT006168.2	90.91	418	31	4	6	421	71	483	6e-141	502
XLOC_000233	NONHSAT149770.1	95.1	286	13	1	29	314	1	285	5e-125	448
XLOC_000234	NONHSAT149778.1	95.41	109	5	0	75	183	252	360	4e-43	176
XLOC_000235	NONHSAT149782.1	99.02	102	1	0	471	572	296	397	2e-47	194
XLOC_000236	NONHSAT006391.2	94.28	402	15	3	542	940	221	617	2e-170	601
XLOC_000236	NONHSAT006391.2	95.47	552	16	4	1	549	72	617	0	874
XLOC_000237	NONHSAT006443.2	93.67	663	37	4	137	797	382	1041	0	952
XLOC_000237	NONHSAT006442.2	91.75	739	38	6	45	767	1297	2028	0	922
XLOC_000237	NONHSAT006437.2	93.92	148	9	0	1	148	331	478	5e-57	222
XLOC_000237	NONHSAT006442.2	91.75	739	38	6	465	1187	1297	2028	0	922
XLOC_000237	NONHSAT006438.2	91.67	84	5	1	69	152	269	350	1e-21	105
XLOC_000237	NONHSAT006443.2	93.67	663	37	4	218	878	382	1041	0	952
XLOC_000237	NONHSAT006438.2	92.04	377	22	3	36	409	269	640	6e-139	496
XLOC_000237	NONHSAT006442.2	91.78	742	38	6	114	839	1294	2028	0	928
XLOC_000238	NONHSAT006479.2	94.4	393	22	0	33	425	578	970	5e-172	605
XLOC_000239	NONHSAT154161.1	89.29	336	25	6	66	398	2415	2742	4e-93	343
XLOC_000240	NONHSAT201457.1	100	24	0	0	842	865	1101	1078	0.0005	48.1
XLOC_000241	NONHSAT006905.2	92.67	300	21	1	39	337	1232	933	5e-114	412
XLOC_000241	NONHSAT006905.2	92.72	302	21	1	135	435	1234	933	4e-115	416
XLOC_000241	NONHSAT006905.2	92.69	301	21	1	178	477	1233	933	1e-114	414
XLOC_000245	NONHSAT162631.1	92	75	6	0	262	336	190	264	2e-20	101
XLOC_000246	NONHSAT090180.2	87.34	79	9	1	185	263	380	457	6e-11	69.9
XLOC_000247	NONHSAT007038.2	96.97	132	3	1	1	131	217	348	2e-56	222
XLOC_000250	NONHSAT007118.2	91.62	740	29	8	548	1267	755	1481	0	961
XLOC_000251	NONHSAT007159.2	92.53	950	49	7	95	1027	200	1144	0	1294
XLOC_000253	NONHSAT009896.2	89.39	396	37	2	354	749	2835	3225	8e-123	442
XLOC_000254	NONHSAT153042.1	98.47	131	2	0	690	820	33	163	4e-63	244
XLOC_000254	NONHSAT153042.1	98.05	154	3	0	667	820	10	163	2e-74	281
XLOC_000254	NONHSAT153042.1	98.44	128	2	0	699	826	36	163	2e-61	238
XLOC_000254	NONHSAT177219.1	100	58	0	0	763	820	3803	3860	2e-24	115
XLOC_000256	NONHSAT153037.1	92.81	139	10	0	87	225	721	859	2e-49	196
XLOC_000259	NONHSAT201420.1	88.18	110	13	0	356	465	1046	937	2e-24	115
XLOC_000259	NONHSAT201420.1	88.18	110	13	0	268	377	1046	937	1e-24	115
XLOC_000259	NONHSAT201420.1	88.18	110	13	0	152	261	1046	937	1e-24	115
XLOC_000260	NONHSAT153001.1	98.85	174	2	0	367	540	172	345	1e-88	329
XLOC_000260	NONHSAT012746.2	84.09	88	14	0	360	447	89	176	1e-08	63.9
XLOC_000260	NONHSAT153001.1	98.85	174	2	0	69	242	172	345	1e-88	329
XLOC_000260	NONHSAT153001.1	98.85	174	2	0	261	434	172	345	1e-88	329
XLOC_000260	NONHSAT153001.1	98.86	175	2	0	285	459	172	346	2e-89	331
XLOC_000260	NONHSAT153001.1	98.86	176	2	0	288	463	171	346	5e-90	333
XLOC_000260	NONHSAT153001.1	98.85	174	2	0	285	458	172	345	1e-88	329
XLOC_000260	NONHSAT153001.1	98.86	175	2	0	251	425	171	345	3e-89	331
XLOC_000260	NONHSAT153001.1	98.85	174	2	0	44	217	172	345	1e-88	329
XLOC_000260	NONHSAT153001.1	96.25	267	10	0	217	483	80	346	3e-125	450
XLOC_000261	NONHSAT153002.1	100	34	0	0	297	330	296	329	2e-10	67.9
XLOC_000261	NONHSAT153002.1	100	34	0	0	743	776	296	329	5e-10	67.9
XLOC_000262	NONHSAT009623.2	98.98	98	1	0	1	98	196	293	1e-45	186
XLOC_000262	NONHSAT009623.2	98.91	92	1	0	1	92	202	293	4e-42	174
XLOC_000264	NONHSAT009576.2	93.24	148	10	0	1	148	17	164	3e-54	214
XLOC_000264	NONHSAT009576.2	94.69	113	6	0	5	117	54	166	6e-43	176
XLOC_000265	NONHSAT152960.1	97.56	82	2	0	149	230	1115	1196	8e-34	147
XLOC_000265	NONHSAT152961.1	92.44	291	17	2	3	293	202	487	9e-108	392
XLOC_000265	NONHSAT152961.1	92.41	290	17	2	1	290	203	487	5e-107	391
XLOC_000265	NONHSAT152961.1	92.28	285	17	2	1	285	208	487	5e-104	381
XLOC_000265	NONHSAT152961.1	92.11	266	16	2	1	266	227	487	9e-96	351
XLOC_000265	NONHSAT152961.1	91.91	235	14	2	1	235	258	487	1e-81	305
XLOC_000265	NONHSAT152961.1	91.91	235	14	2	1	235	258	487	2e-81	305
XLOC_000265	NONHSAT152960.1	97.56	82	2	0	237	318	1115	1196	8e-34	147
XLOC_000265	NONHSAT152960.1	97.56	82	2	0	325	406	1115	1196	1e-33	147
XLOC_000265	NONHSAT152960.1	97.56	82	2	0	321	402	1115	1196	6e-34	147
XLOC_000265	NONHSAT152960.1	97.56	82	2	0	300	381	1115	1196	1e-33	147
XLOC_000265	NONHSAT152960.1	97.56	82	2	0	261	342	1115	1196	1e-33	147
XLOC_000265	NONHSAT152960.1	97.56	82	2	0	164	245	1115	1196	5e-34	147
XLOC_000265	NONHSAT152960.1	97.56	82	2	0	173	254	1115	1196	2e-34	147
XLOC_000265	NONHSAT214463.1	90.41	271	24	2	86	355	644	913	2e-84	315
XLOC_000266	NONHSAT152958.1	92.72	261	17	1	57	317	36	294	9e-99	361
XLOC_000268	NONHSAT152946.1	93.44	457	28	1	160	616	105	559	0	662
XLOC_000269	NONHSAT166198.1	87.4	254	31	1	2365	2617	384	131	5e-62	242
XLOC_000269	NONHSAT049670.2	100	26	0	0	124	149	27	2	1e-05	52
XLOC_000269	NONHSAT166198.1	87.4	254	31	1	2303	2555	384	131	5e-62	242
XLOC_000269	NONHSAT166198.1	87.4	254	31	1	2300	2552	384	131	5e-62	242
XLOC_000269	NONHSAT166198.1	87.4	254	31	1	2462	2714	384	131	6e-62	242
XLOC_000274	NONHSAT222723.1	89.37	301	31	1	210	509	12820	12520	9e-91	335
XLOC_000274	NONHSAT222723.1	89.37	301	31	1	129	428	12820	12520	7e-91	335
XLOC_000275	NONHSAT009449.2	96.51	516	12	3	242	757	2959	3468	0	821
XLOC_000275	NONHSAT009449.2	96.51	516	12	3	500	1015	2959	3468	0	821
XLOC_000275	NONHSAT009449.2	93.39	378	20	2	1	377	1230	1603	2e-140	500
XLOC_000276	NONHSAT152891.1	93.93	346	20	1	306	650	604	949	8e-144	511
XLOC_000276	NONHSAT152920.1	93.2	309	21	0	1	309	148	456	5e-124	446
XLOC_000276	NONHSAT152920.1	93.23	310	21	0	1	310	148	457	7e-125	448
XLOC_000276	NONHSAT152891.1	93.93	346	20	1	411	755	604	949	1e-143	511
XLOC_000276	NONHSAT152920.1	92.09	177	14	0	210	386	282	458	7e-62	240
XLOC_000276	NONHSAT152891.1	93.55	279	17	1	957	1234	671	949	1e-110	402
XLOC_000276	NONHSAT108462.2	81.94	504	82	6	5	501	1175	1676	8e-61	236
XLOC_000277	NONHSAT152927.1	94.13	443	18	3	84	520	1465	1905	0	658
XLOC_000278	NONHSAT152891.1	94.03	268	16	0	159	426	2720	2987	9e-112	404
XLOC_000279	NONHSAT150486.1	96.24	186	6	1	432	616	318	133	1e-81	305
XLOC_000282	NONHSAT009409.2	94.19	396	19	2	21	413	17	411	7e-168	591
XLOC_000284	NONHSAT154545.1	94.19	241	9	1	38	278	236	1	2e-100	367
XLOC_000285	NONHSAT222665.1	80.33	183	14	2	1	165	179	1	1e-20	101
XLOC_000286	NONHSAT152857.1	94.27	960	49	3	237	1196	24	977	0	1449
XLOC_000286	NONHSAT152857.1	97.06	102	2	1	137	238	24	124	1e-41	170
XLOC_000287	NONHSAT009251.2	96.53	490	12	1	268	757	316	800	0	799
XLOC_000287	NONHSAT009249.2	96.57	321	6	1	480	800	98	413	1e-143	511
XLOC_000288	NONHSAT152813.1	96.57	175	5	1	1	174	10477	10651	9e-78	291
XLOC_000289	NONHSAT150408.1	93.9	82	5	0	78	159	2798	2717	4e-27	123
XLOC_000289	NONHSAT170496.1	95.26	190	9	0	829	1018	1745	1934	2e-81	305
XLOC_000289	NONHSAT150408.1	93.49	169	11	0	487	655	2885	2717	3e-64	248
XLOC_000289	NONHSAT150408.1	95.98	224	9	0	820	1043	1775	1552	1e-91	339
XLOC_000289	NONHSAT150408.1	95.98	224	9	0	732	955	1775	1552	1e-91	339
XLOC_000289	NONHSAT150408.1	93.49	169	11	0	487	655	2885	2717	3e-64	248
XLOC_000290	NONHSAT154515.1	100	23	0	0	222	244	1078	1056	0.0005	46.1
XLOC_000291	NONHSAT196343.1	86.89	61	8	0	656	716	2460	2400	4e-07	58
XLOC_000291	NONHSAT152810.1	96.43	336	10	2	371	704	557	892	1e-156	555
XLOC_000293	NONHSAT009171.2	95.54	112	5	0	570	681	1	112	1e-44	182
XLOC_000293	NONHSAT009171.2	95.54	112	5	0	570	681	1	112	1e-44	182
XLOC_000295	NONHSAT152805.1	93.89	3093	168	10	1944	5021	2070	5156	0	4575
XLOC_000295	NONHSAT009146.2	97.72	219	5	0	1653	1871	677	895	4e-108	394
XLOC_000295	NONHSAT152805.1	93.89	3093	168	10	3076	6153	2070	5156	0	4575
XLOC_000295	NONHSAT009145.2	97.52	685	13	1	2056	2736	1	685	0	1187
XLOC_000295	NONHSAT009152.2	96.38	304	10	1	1117	1420	3938	3636	3e-142	507
XLOC_000295	NONHSAT152805.1	93.89	3093	168	10	3857	6934	2070	5156	0	4575
XLOC_000296	NONHSAT161863.1	88.78	98	10	1	667	763	608	511	2e-19	99.6
XLOC_000299	NONHSAT008997.2	97.35	264	7	0	1	264	395	658	9e-131	468
XLOC_000300	NONHSAT168636.1	92.86	42	3	0	438	479	460	501	1e-07	60
XLOC_000301	NONHSAT173243.1	91.67	36	3	0	528	563	50	85	0.0004	48.1
XLOC_000303	NONHSAT204884.1	87.11	256	30	3	1893	2146	1965	1711	5e-56	222
XLOC_000303	NONHSAT150358.1	93.33	90	6	0	683	772	129	40	4e-29	131
XLOC_000303	NONHSAT150357.1	93.43	1035	63	1	849	1883	1976	947	0	1513
XLOC_000303	NONHSAT150357.1	93.42	1034	63	1	726	1759	1975	947	0	1511
XLOC_000303	NONHSAT150357.1	93.43	1035	63	1	620	1654	1976	947	0	1513
XLOC_000303	NONHSAT008966.2	92.59	675	41	4	928	1601	1834	1168	0	920
XLOC_000304	NONHSAT141542.2	94.03	67	4	0	1071	1137	506	440	6e-20	101
XLOC_000308	NONHSAT137840.2	87.68	138	7	2	369	496	5841	5704	1e-31	139
XLOC_000312	NONHSAT192236.1	85.4	274	27	2	28	288	44749	44476	9e-60	232
XLOC_000313	NONHSAT008764.2	97.26	73	2	0	1	73	74	2	4e-29	129
XLOC_000314	NONHSAT152730.1	97.3	148	4	0	236	383	1	148	2e-68	262
XLOC_000314	NONHSAT152730.1	97.3	148	4	0	204	351	1	148	2e-68	262
XLOC_000314	NONHSAT152730.1	97.28	147	4	0	297	443	1	147	1e-67	260
XLOC_000314	NONHSAT152730.1	97.28	147	4	0	167	313	1	147	5e-68	260
XLOC_000314	NONHSAT152730.1	97.28	147	4	0	218	364	1	147	6e-68	260
XLOC_000314	NONHSAT152730.1	97.28	147	4	0	164	310	1	147	5e-68	260
XLOC_000314	NONHSAT152730.1	97.3	148	4	0	106	253	1	148	3e-68	262
XLOC_000314	NONHSAT152730.1	97.76	223	5	0	106	328	1	223	4e-111	402
XLOC_000314	NONHSAT152730.1	97.3	148	4	0	80	227	1	148	2e-68	262
XLOC_000315	NONHSAT008664.2	97.99	298	6	0	1	298	91	388	1e-153	543
XLOC_000316	NONHSAT008654.2	96.03	403	15	1	98	499	5956	6358	0	664
XLOC_000317	NONHSAT154423.1	98.84	86	1	0	1	86	996	911	1e-38	163
XLOC_000318	NONHSAT152700.1	96.53	346	12	0	86	431	152	497	8e-168	591
XLOC_000319	NONHSAT152699.1	94.21	501	25	4	27	525	8	506	0	696
XLOC_000320	NONHSAT161358.1	87.06	85	11	0	1	85	190	106	2e-14	81.8
XLOC_000322	NONHSAT191379.1	84.05	351	44	5	67	407	897	549	1e-57	226
XLOC_000322	NONHSAT191379.1	84.05	351	44	5	67	407	897	549	7e-58	226
XLOC_000322	NONHSAT191379.1	84.05	351	44	5	40	380	897	549	1e-57	226
XLOC_000322	NONHSAT191379.1	84.05	351	44	5	39	379	897	549	9e-58	226
XLOC_000322	NONHSAT191379.1	84.05	351	44	5	16	356	897	549	5e-58	226
XLOC_000322	NONHSAT191379.1	84.05	351	44	5	16	356	897	549	1e-57	226
XLOC_000322	NONHSAT191379.1	84.05	351	44	5	10	350	897	549	5e-58	226
XLOC_000322	NONHSAT191379.1	83.85	322	41	4	4	315	869	549	1e-52	208
XLOC_000322	NONHSAT008550.2	93.57	342	18	2	1	339	791	451	5e-138	492
XLOC_000322	NONHSAT152682.1	90	50	5	0	324	373	126	175	7e-08	60
XLOC_000323	NONHSAT162399.1	89.54	832	82	4	1	828	8381	9211	0	888
XLOC_000324	NONHSAT152681.1	94.14	256	9	1	1	250	441	696	8e-108	391
XLOC_000326	NONHSAT008391.2	92.3	1195	72	5	72	1253	1	1188	0	1629
XLOC_000326	NONHSAT008391.2	91.5	929	65	4	373	1288	261	1188	0	1203
XLOC_000326	NONHSAT008391.2	91.49	928	65	4	255	1169	261	1187	0	1201
XLOC_000326	NONHSAT152643.1	96.36	55	2	0	48	102	190	244	6e-18	93.7
XLOC_000326	NONHSAT152643.1	96.15	52	2	0	30	81	190	241	4e-16	87.7
XLOC_000326	NONHSAT054568.2	100	24	0	0	1105	1128	278	301	0.0007	48.1
XLOC_000327	NONHSAT008384.2	94.61	204	11	0	221	424	589	792	2e-85	317
XLOC_000327	NONHSAT008384.2	94.63	205	11	0	70	274	588	792	4e-86	319
XLOC_000330	NONHSAT167973.1	100	24	0	0	454	477	639	616	0.0004	48.1
XLOC_000331	NONHSAT152630.1	94.81	270	11	1	83	349	752	1021	1e-116	420
XLOC_000332	NONHSAT169024.1	90.36	83	6	2	81	161	118	36	2e-15	85.7
XLOC_000332	NONHSAT150137.1	91.87	123	9	1	188	310	176	55	7e-37	157
XLOC_000332	NONHSAT152629.1	97.82	229	1	1	545	769	91	319	8e-114	412
XLOC_000332	NONHSAT055686.2	89.72	107	11	0	23	129	17863	17757	2e-27	125
XLOC_000334	NONHSAT152621.1	94.29	280	16	0	145	424	110	389	7e-119	428
XLOC_000338	NONHSAT192510.1	85.71	70	9	1	310	379	402	334	1e-05	52
XLOC_000339	NONHSAT008281.2	93.98	83	5	0	484	566	2052	1970	2e-27	125
XLOC_000339	NONHSAT008281.2	93.98	83	5	0	1198	1280	2052	1970	4e-27	125
XLOC_000341	NONHSAT152606.1	95.76	401	17	0	1	401	224	624	0	660
XLOC_000342	NONHSAT191518.1	92.28	272	20	1	1938	2209	1892	1622	6e-99	365
XLOC_000342	NONHSAT191518.1	92.28	272	20	1	1938	2209	1892	1622	6e-99	365
XLOC_000342	NONHSAT148667.1	93.68	190	11	1	2112	2301	2463	2651	1e-71	274
XLOC_000342	NONHSAT056165.2	86.33	139	18	1	788	925	5627	5489	7e-25	117
XLOC_000342	NONHSAT191518.1	92.28	272	20	1	2049	2320	1892	1622	6e-99	365
XLOC_000342	NONHSAT148667.1	93.68	190	11	1	2085	2274	2463	2651	1e-71	274
XLOC_000342	NONHSAT056165.2	86.33	139	18	1	1173	1310	5627	5489	1e-24	117
XLOC_000342	NONHSAT191518.1	92.28	272	20	1	2045	2316	1892	1622	6e-99	365
XLOC_000342	NONHSAT148667.1	93.68	190	11	1	1981	2170	2463	2651	1e-71	274
XLOC_000342	NONHSAT168157.1	90.91	44	4	0	339	382	2892	2849	2e-06	56
XLOC_000342	NONHSAT148667.1	93.68	190	11	1	1865	2054	2463	2651	1e-71	274
XLOC_000342	NONHSAT056165.2	86.33	139	18	1	515	652	5627	5489	5e-25	117
XLOC_000342	NONHSAT191518.1	92.28	272	20	1	1759	2030	1892	1622	6e-99	365
XLOC_000342	NONHSAT191518.1	92.28	272	20	1	1756	2027	1892	1622	6e-99	365
XLOC_000342	NONHSAT148667.1	93.68	190	11	1	2067	2256	2463	2651	1e-71	274
XLOC_000343	NONHSAT007812.2	92.39	1564	82	7	1	1529	248	1809	0	2145
XLOC_000343	NONHSAT007813.2	92.77	581	29	2	383	951	864	1443	0	825
XLOC_000343	NONHSAT007813.2	92.78	582	29	2	136	705	863	1443	0	827
XLOC_000344	NONHSAT007356.2	93.01	143	8	1	129	271	82	222	1e-49	198
XLOC_000344	NONHSAT007356.2	93.01	143	8	1	426	568	82	222	2e-49	198
XLOC_000346	NONHSAT007392.2	98.62	1162	15	1	714	1875	3346	4506	0	1961
XLOC_000347	NONHSAT150017.1	100	27	0	0	1	27	832	858	3e-06	54
XLOC_000349	NONHSAT196334.1	81.35	193	33	1	519	708	787	979	8e-18	93.7
XLOC_000349	NONHSAT196334.1	81.35	193	33	1	926	1115	787	979	1e-17	93.7
XLOC_000350	NONHSAT153273.1	84.59	292	40	4	2013	2301	25099	25388	5e-47	192
XLOC_000350	NONHSAT153273.1	84.59	292	40	4	1873	2161	25099	25388	5e-47	192
XLOC_000350	NONHSAT007580.2	93.24	340	20	2	42	378	357	18	7e-134	478
XLOC_000350	NONHSAT222700.1	88.83	358	32	5	160	509	1	358	6e-98	359
XLOC_000350	NONHSAT222700.1	88.83	358	32	5	268	617	1	358	7e-98	359
XLOC_000351	NONHSAT150058.1	94.37	142	8	0	214	355	80	221	1e-55	218
XLOC_000351	NONHSAT150058.1	94.37	142	8	0	195	336	80	221	1e-55	218
XLOC_000351	NONHSAT150058.1	94.37	142	8	0	178	319	80	221	1e-55	218
XLOC_000352	NONHSAT150057.1	95.89	146	6	0	21	166	663	808	6e-63	242
XLOC_000352	NONHSAT150057.1	92.76	221	12	1	118	338	375	591	6e-83	309
XLOC_000353	NONHSAT150061.1	91.46	246	17	1	924	1169	1	242	1e-85	319
XLOC_000359	NONHSAT150083.1	95.65	230	10	0	81	310	396	625	1e-103	377
XLOC_000359	NONHSAT007774.2	95.32	235	11	0	26	260	161	395	3e-104	379
XLOC_000359	NONHSAT007774.2	95.32	235	11	0	71	305	161	395	4e-104	379
XLOC_000359	NONHSAT150083.1	95.65	230	10	0	120	349	396	625	2e-103	377
XLOC_000362	NONHSAT010779.2	86	150	17	2	1	148	518	371	5e-26	119
XLOC_000362	NONHSAT010779.2	86	150	17	2	1	148	518	371	5e-26	119
XLOC_000362	NONHSAT203425.1	89.39	179	13	3	210	382	167	345	4e-46	186
XLOC_000364	NONHSAT101274.2	83.95	299	31	6	90	374	4053	4348	6e-46	186
XLOC_000365	NONHSAT010766.2	96.83	63	2	0	1	63	644	706	1e-22	109
XLOC_000366	NONHSAT010763.2	95.42	306	14	0	21	326	937	632	4e-139	496
XLOC_000367	NONHSAT214372.1	86.88	160	21	0	305	464	892	1051	4e-35	151
XLOC_000367	NONHSAT214372.1	86.88	160	21	0	531	690	892	1051	5e-35	151
XLOC_000367	NONHSAT214372.1	86.88	160	21	0	520	679	892	1051	5e-35	151
XLOC_000367	NONHSAT214372.1	86.88	160	21	0	186	345	892	1051	3e-35	151
XLOC_000367	NONHSAT214372.1	86.88	160	21	0	193	352	892	1051	4e-35	151
XLOC_000367	NONHSAT214372.1	86.88	160	21	0	208	367	892	1051	4e-35	151
XLOC_000368	NONHSAT216763.1	96.05	152	5	1	1	152	340	490	6e-64	246
XLOC_000369	NONHSAT010657.2	95.32	342	12	1	4644	4985	681	1018	3e-154	549
XLOC_000369	NONHSAT010657.2	95.73	1030	25	7	6000	7022	1	1018	0	1661
XLOC_000370	NONHSAT032357.2	90.65	139	11	2	333	470	280	417	5e-37	157
XLOC_000371	NONHSAT010633.2	94.97	338	14	1	171	505	567	230	1e-149	531
XLOC_000371	NONHSAT010633.2	94.97	338	14	1	175	509	567	230	1e-149	531
XLOC_000372	NONHSAT153266.1	96.72	61	2	0	39	99	1	61	3e-21	105
XLOC_000372	NONHSAT150864.1	98.15	594	11	0	426	1019	2671	2078	0	1090
XLOC_000372	NONHSAT150864.1	98.15	594	11	0	844	1437	2671	2078	0	1090
XLOC_000372	NONHSAT150864.1	98.15	594	11	0	622	1215	2671	2078	0	1090
XLOC_000372	NONHSAT153266.1	97.22	36	1	0	379	414	360	395	4e-09	63.9
XLOC_000372	NONHSAT150864.1	98.15	594	11	0	207	800	2671	2078	0	1090
XLOC_000372	NONHSAT150864.1	98.15	594	11	0	359	952	2671	2078	0	1090
XLOC_000372	NONHSAT150864.1	98.15	594	11	0	53	646	2671	2078	0	1090
XLOC_000375	NONHSAT222704.1	95.35	43	2	0	558	600	279	237	2e-10	69.9
XLOC_000376	NONHSAT154822.1	92.47	93	7	0	1	93	93	1	8e-29	129
XLOC_000376	NONHSAT215040.1	86.75	83	10	1	320	401	294	212	7e-11	69.9
XLOC_000376	NONHSAT215040.1	86.75	83	10	1	239	320	294	212	6e-11	69.9
XLOC_000376	NONHSAT215040.1	86.75	83	10	1	334	415	294	212	8e-11	69.9
XLOC_000379	NONHSAT068119.2	87.5	120	15	0	33	152	2392	2273	9e-26	119
XLOC_000381	NONHSAT010407.2	93.82	421	25	1	155	575	68	487	1e-176	620
XLOC_000382	NONHSAT208569.1	94.51	91	5	0	839	929	1063	973	5e-32	141
XLOC_000385	NONHSAT114895.2	84.96	585	82	3	329	913	717	1295	4e-123	444
XLOC_000387	NONHSAT153139.1	89.33	75	8	0	1	75	925	999	2e-15	85.7
XLOC_000388	NONHSAT183047.1	93.55	31	2	0	6	36	1964	1994	0.0006	46.1
XLOC_000389	NONHSAT153110.1	92.91	268	18	1	149	416	1	267	3e-102	373
XLOC_000391	NONHSAT010178.2	88.62	123	14	0	40	162	28	150	7e-30	133
XLOC_000391	NONHSAT131432.2	97.65	85	2	0	296	380	850	766	5e-36	153
XLOC_000391	NONHSAT131432.2	97.65	85	2	0	245	329	850	766	4e-36	153
XLOC_000393	NONHSAT010140.2	94.89	176	3	2	35	207	23	195	3e-71	270
XLOC_000393	NONHSAT010141.2	96.25	160	3	1	47	203	36	195	5e-70	266
XLOC_000395	NONHSAT153098.1	93.54	557	36	0	131	687	336	892	0	819
XLOC_000395	NONHSAT153100.1	93.18	484	30	1	3	486	381	861	0	694
XLOC_000397	NONHSAT191866.1	100	24	0	0	401	424	475	498	0.0003	48.1
XLOC_000397	NONHSAT191866.1	100	24	0	0	594	617	475	498	0.0004	48.1
XLOC_000399	NONHSAT150692.1	89.99	749	51	7	347	1091	770	42	0	868
XLOC_000400	NONHSAT153080.1	89.17	351	31	1	1	344	322	672	5e-110	398
XLOC_000400	NONHSAT010066.2	95.81	477	20	0	27	503	123	599	0	787
XLOC_000400	NONHSAT010066.2	95.81	477	20	0	27	503	123	599	0	787
XLOC_000400	NONHSAT153078.1	98.18	55	1	0	1	55	294	348	5e-20	101
XLOC_000401	NONHSAT094799.2	97.77	224	5	0	127	350	4318	4095	7e-112	404
XLOC_000402	NONHSAT198180.1	95.42	153	7	0	229	381	221	69	5e-64	248
XLOC_000402	NONHSAT094789.2	96.79	156	5	0	1602	1757	363	208	2e-70	270
XLOC_000402	NONHSAT094789.2	96.79	156	5	0	1294	1449	363	208	1e-70	270
XLOC_000402	NONHSAT094789.2	96.79	156	5	0	427	582	363	208	9e-71	270
XLOC_000402	NONHSAT094789.2	95.21	501	24	0	255	755	708	208	0	803
XLOC_000402	NONHSAT094789.2	95.21	501	24	0	255	755	708	208	0	803
XLOC_000403	NONHSAT137877.2	92.77	83	6	0	1	83	528	446	3e-25	117
XLOC_000404	NONHSAT094707.2	87.46	917	79	10	2730	3636	77	967	0	825
XLOC_000406	NONHSAT094680.2	90	230	22	1	465	693	326	555	1e-69	266
XLOC_000407	NONHSAT094678.2	92.99	599	36	4	1252	1846	6	602	0	827
XLOC_000407	NONHSAT094678.2	92.54	684	45	4	1252	1931	6	687	0	924
XLOC_000410	NONHSAT094568.2	87.79	385	25	4	5	372	1891	1512	8e-109	394
XLOC_000410	NONHSAT094568.2	87.79	385	25	4	5	372	1891	1512	1e-108	394
XLOC_000410	NONHSAT094568.2	87.79	385	25	4	5	372	1891	1512	1e-108	394
XLOC_000410	NONHSAT094568.2	87.79	385	25	4	5	372	1891	1512	1e-108	394
XLOC_000410	NONHSAT094572.2	96.01	576	20	1	567	1142	1213	641	0	955
XLOC_000410	NONHSAT076181.2	88.97	145	13	1	1	145	540	681	4e-37	157
XLOC_000410	NONHSAT094572.2	93.73	877	54	1	1564	2440	2342	1467	0	1294
XLOC_000410	NONHSAT094572.2	92.95	965	58	2	1564	2528	2342	1388	0	1374
XLOC_000411	NONHSAT176648.1	88.62	123	8	3	445	565	1287	1169	2e-24	115
XLOC_000412	NONHSAT094578.2	90.27	329	27	3	321	648	401	77	1e-103	379
XLOC_000412	NONHSAT094570.2	93.74	463	23	3	605	1067	3732	3276	4e-159	563
XLOC_000413	NONHSAT194949.1	95.07	284	11	2	2940	3223	1	281	8e-121	438
XLOC_000413	NONHSAT194949.1	95.07	284	11	2	2940	3223	1	281	8e-121	438
XLOC_000413	NONHSAT194949.1	95.07	284	11	2	2940	3223	1	281	9e-121	438
XLOC_000413	NONHSAT194949.1	95.07	284	11	2	2940	3223	1	281	8e-121	438
XLOC_000414	NONHSAT223804.1	93.04	273	19	0	1	273	753	1025	4e-107	391
XLOC_000414	NONHSAT223804.1	93.04	273	19	0	1	273	753	1025	7e-107	391
XLOC_000414	NONHSAT198146.1	90.91	242	18	2	107	345	241	1	7e-78	293
XLOC_000415	NONHSAT198144.1	93.43	335	21	1	682	1016	334	1	1e-134	482
XLOC_000415	NONHSAT198144.1	93.46	627	39	2	1	626	1422	797	0	902
XLOC_000416	NONHSAT150944.1	94.85	369	18	1	539	907	3252	2885	4e-162	573
XLOC_000416	NONHSAT150945.1	92.95	369	25	1	1	368	1434	1066	2e-145	517
XLOC_000418	NONHSAT025266.2	88.89	108	12	0	164	271	13776	13669	2e-25	119
XLOC_000418	NONHSAT025266.2	88.89	108	12	0	164	271	13776	13669	2e-25	119
XLOC_000418	NONHSAT025266.2	88.89	108	12	0	164	271	13776	13669	3e-25	119
XLOC_000418	NONHSAT025266.2	88.89	108	12	0	164	271	13776	13669	2e-25	119
XLOC_000418	NONHSAT025266.2	88.89	108	12	0	164	271	13776	13669	2e-25	119
XLOC_000419	NONHSAT150964.1	89.67	271	13	3	181	436	275	5	2e-70	268
XLOC_000420	NONHSAT150972.1	90.79	608	32	3	175	777	811	223	0	779
XLOC_000420	NONHSAT150972.1	88.94	461	27	3	163	618	664	223	1e-148	527
XLOC_000420	NONHSAT150972.1	88.5	339	17	2	168	503	560	241	3e-106	387
XLOC_000420	NONHSAT150972.1	90.85	590	32	2	175	761	811	241	0	765
XLOC_000420	NONHSAT150972.1	92.75	193	11	1	182	371	433	241	2e-70	268
XLOC_000420	NONHSAT150972.1	93.16	234	16	0	163	396	664	431	3e-91	337
XLOC_000420	NONHSAT150972.1	88.33	908	62	4	1065	1947	1129	241	0	1007
XLOC_000421	NONHSAT224040.1	92.49	1159	82	2	953	2107	2783	1626	0	1598
XLOC_000421	NONHSAT224040.1	92.49	1159	82	2	953	2107	2783	1626	0	1598
XLOC_000421	NONHSAT224040.1	92.49	1159	82	2	953	2107	2783	1626	0	1598
XLOC_000421	NONHSAT224040.1	92.49	1159	82	2	953	2107	2783	1626	0	1598
XLOC_000421	NONHSAT224040.1	92.49	1159	82	2	953	2107	2783	1626	0	1598
XLOC_000423	NONHSAT000343.2	98.47	131	2	0	46	176	829	699	1e-63	244
XLOC_000424	NONHSAT060078.2	89.57	211	22	0	402	612	4735	4945	9e-63	244
XLOC_000430	NONHSAT181075.1	93.28	268	17	1	552	819	288	554	3e-104	381
XLOC_000431	NONHSAT151008.1	91.73	133	11	0	186	318	787	655	3e-43	176
XLOC_000433	NONHSAT000540.2	92.81	640	46	0	40	679	804	165	0	904
XLOC_000433	NONHSAT000543.2	92.45	503	33	3	1	502	1395	897	0	676
XLOC_000433	NONHSAT000543.2	92.45	503	33	3	1	502	1395	897	0	676
XLOC_000433	NONHSAT151015.1	90.37	218	19	1	212	427	485	268	1e-67	260
XLOC_000433	NONHSAT000545.2	92.27	194	14	1	95	287	2220	2027	9e-67	258
XLOC_000434	NONHSAT000546.2	92.26	956	67	4	620	1572	1747	796	0	1283
XLOC_000434	NONHSAT000546.2	91.74	581	43	2	760	1339	1747	1171	0	761
XLOC_000435	NONHSAT151020.1	90.07	151	15	0	6	156	907	757	3e-44	180
XLOC_000435	NONHSAT151020.1	90	150	15	0	6	155	907	758	9e-44	178
XLOC_000437	NONHSAT016230.2	89.47	95	10	0	1310	1404	456	550	3e-22	109
XLOC_000438	NONHSAT154831.1	100	27	0	0	246	272	1807	1833	1e-05	54
XLOC_000438	NONHSAT154831.1	100	27	0	0	246	272	1807	1833	2e-05	54
XLOC_000438	NONHSAT154831.1	100	27	0	0	246	272	1807	1833	1e-05	54
XLOC_000439	NONHSAT159058.1	97.4	77	2	0	1	77	86	10	2e-31	137
XLOC_000440	NONHSAT137539.2	85.29	68	8	1	141	206	4104	4171	7e-05	50.1
XLOC_000443	NONHSAT000626.2	92.06	63	5	0	1	63	570	508	5e-16	85.7
XLOC_000445	NONHSAT191174.1	89.29	84	8	1	10	92	949	1032	3e-16	87.7
XLOC_000446	NONHSAT000821.2	93.73	574	17	6	521	1079	1359	1928	0	831
XLOC_000446	NONHSAT000821.2	93.72	573	17	6	377	934	1360	1928	0	829
XLOC_000446	NONHSAT000821.2	93.72	573	17	6	377	934	1360	1928	0	829
XLOC_000447	NONHSAT148348.1	96.12	206	8	0	140	345	621	826	2e-93	345
XLOC_000448	NONHSAT148382.1	95.81	167	7	0	254	420	291	457	6e-73	276
XLOC_000450	NONHSAT153399.1	96.18	157	6	0	401	557	703	859	3e-69	264
XLOC_000450	NONHSAT153399.1	100	31	0	0	726	756	167	197	3e-08	61.9
XLOC_000450	NONHSAT153399.1	95.95	148	6	0	980	1127	703	850	1e-63	246
XLOC_000451	NONHSAT151134.1	96.52	345	8	1	26	366	345	1	2e-166	587
XLOC_000452	NONHSAT205601.1	97.96	49	1	0	496	544	4119	4167	9e-17	89.7
XLOC_000453	NONHSAT151162.1	91.69	445	23	2	77	507	3035	2591	2e-169	597
XLOC_000453	NONHSAT151162.1	91.74	448	23	2	226	659	3038	2591	4e-171	603
XLOC_000455	NONHSAT001092.2	86.81	182	7	2	68	237	382	206	3e-45	184
XLOC_000456	NONHSAT152250.1	88.33	257	28	2	349	604	2048	2303	1e-66	256
XLOC_000457	NONHSAT005967.2	93.51	339	22	0	5	343	492	154	7e-140	498
XLOC_000458	NONHSAT005828.2	96.08	102	4	0	297	398	266	165	3e-41	170
XLOC_000458	NONHSAT005828.2	96.12	103	4	0	415	517	266	164	7e-42	172
XLOC_000458	NONHSAT005828.2	96.12	103	4	0	207	309	266	164	4e-42	172
XLOC_000458	NONHSAT159070.1	91.37	139	12	0	61	199	159	21	2e-44	180
XLOC_000459	NONHSAT151179.1	90.31	320	19	1	1	308	1474	1155	3e-111	402
XLOC_000459	NONHSAT151179.1	87.61	331	18	2	1	319	1474	1155	3e-97	357
XLOC_000459	NONHSAT151179.1	90.31	320	19	1	1	308	1474	1155	3e-111	402
XLOC_000460	NONHSAT001214.2	93.43	289	14	2	1	284	333	45	3e-114	412
XLOC_000460	NONHSAT001132.2	90.99	333	25	2	1	328	335	3	3e-114	412
XLOC_000461	NONHSAT219051.1	89.95	945	78	9	16	952	1828	893	0	1019
XLOC_000461	NONHSAT219051.1	89.95	945	78	9	16	952	1828	893	0	1019
XLOC_000461	NONHSAT219051.1	89.51	858	77	7	16	868	1828	979	0	898
XLOC_000461	NONHSAT219051.1	89.95	945	78	9	16	952	1828	893	0	1019
XLOC_000461	NONHSAT219051.1	89.95	945	78	9	16	952	1828	893	0	1019
XLOC_000461	NONHSAT219051.1	89.95	945	78	9	16	952	1828	893	0	1019
XLOC_000462	NONHSAT097772.2	91.85	466	36	2	16	480	465	1	2e-172	607
XLOC_000463	NONHSAT001273.2	85.29	367	28	6	33	375	2566	2202	8e-78	291
XLOC_000465	NONHSAT153458.1	93.99	233	14	0	188	420	185	417	1e-95	351
XLOC_000465	NONHSAT153458.1	93.97	232	14	0	380	611	185	416	7e-95	349
XLOC_000465	NONHSAT153458.1	94.49	272	15	0	248	519	186	457	2e-116	420
XLOC_000466	NONHSAT175204.1	88.27	358	38	2	354	707	745	388	1e-99	365
XLOC_000466	NONHSAT183025.1	96.55	29	1	0	84	112	2210	2182	5e-05	50.1
XLOC_000467	NONHSAT001362.2	93.62	956	57	2	575	1530	1404	453	0	1400
XLOC_000467	NONHSAT001362.2	93.53	896	54	2	575	1470	1404	513	0	1304
XLOC_000467	NONHSAT001364.2	95.43	416	18	1	1836	2251	792	378	0	666
XLOC_000467	NONHSAT001365.2	95.44	417	18	1	1836	2252	581	166	0	668
XLOC_000467	NONHSAT001365.2	95.41	414	18	1	1836	2249	581	169	0	662
XLOC_000467	NONHSAT001365.2	95.44	417	18	1	1836	2252	581	166	0	668
XLOC_000467	NONHSAT001365.2	95.43	416	18	1	1836	2251	581	167	0	666
XLOC_000467	NONHSAT001365.2	95.44	417	18	1	1836	2252	581	166	0	668
XLOC_000467	NONHSAT001365.2	95.45	418	18	1	1836	2253	581	165	0	670
XLOC_000467	NONHSAT001365.2	95.45	418	18	1	1836	2253	581	165	0	670
XLOC_000467	NONHSAT001365.2	95.45	418	18	1	1836	2253	581	165	0	670
XLOC_000467	NONHSAT001365.2	95.41	414	18	1	1836	2249	581	169	0	662
XLOC_000467	NONHSAT001365.2	95.42	415	18	1	1836	2250	581	168	0	664
XLOC_000467	NONHSAT001365.2	95.45	418	18	1	1836	2253	581	165	0	670
XLOC_000467	NONHSAT118374.2	96.43	56	2	0	230	285	276	221	1e-18	95.6
XLOC_000467	NONHSAT151231.1	93.22	118	8	0	735	852	118	1	6e-41	170
XLOC_000467	NONHSAT151231.1	93.22	118	8	0	604	721	118	1	6e-41	170
XLOC_000467	NONHSAT104862.2	96.43	28	1	0	57	84	44	71	0.0003	48.1
XLOC_000468	NONHSAT001374.2	93.76	529	21	2	115	631	529	1	0	791
XLOC_000470	NONHSAT009896.2	100	23	0	0	384	406	3163	3141	0.001	46.1
XLOC_000471	NONHSAT196667.1	86.89	122	16	0	934	1055	12	133	4e-24	115
XLOC_000471	NONHSAT196667.1	86.89	122	16	0	934	1055	12	133	7e-24	115
XLOC_000471	NONHSAT196667.1	86.89	122	16	0	934	1055	12	133	1e-23	115
XLOC_000472	NONHSAT151237.1	100	60	0	0	70	129	60	1	1e-25	119
XLOC_000472	NONHSAT151237.1	100	59	0	0	1	59	59	1	2e-25	117
XLOC_000472	NONHSAT151237.1	100	59	0	0	1	59	59	1	2e-25	117
XLOC_000473	NONHSAT151254.1	93.84	292	6	1	2880	3171	634	355	2e-124	450
XLOC_000474	NONHSAT185542.1	96.55	29	1	0	1695	1723	2592	2620	0.0003	50.1
XLOC_000474	NONHSAT151256.1	98.53	68	1	0	1688	1755	4545	4478	1e-27	127
XLOC_000474	NONHSAT151256.1	96.61	354	11	1	1692	2044	4446	4093	2e-169	599
XLOC_000474	NONHSAT151256.1	93.78	225	11	2	1755	1978	4056	3834	6e-86	321
XLOC_000474	NONHSAT151256.1	93.81	226	11	2	1688	1912	4057	3834	1e-86	323
XLOC_000475	NONHSAT151257.1	96.91	583	17	1	156	738	909	328	0	1005
XLOC_000476	NONHSAT151260.1	92.89	1196	65	4	1	1181	1216	26	0	1697
XLOC_000476	NONHSAT151260.1	92.96	1221	66	4	1	1206	1216	1	0	1739
XLOC_000477	NONHSAT153653.1	89.49	257	27	0	87	343	299	555	3e-78	295
XLOC_000477	NONHSAT153653.1	89.49	257	27	0	87	343	299	555	4e-78	295
XLOC_000477	NONHSAT153653.1	89.49	257	27	0	87	343	299	555	6e-78	295
XLOC_000479	NONHSAT001575.2	100	364	0	0	214	577	411	48	4e-171	603
XLOC_000479	NONHSAT001575.2	100	411	0	0	214	624	411	1	0	696
XLOC_000479	NONHSAT001575.2	100	410	0	0	205	614	410	1	0	694
XLOC_000481	NONHSAT151272.1	93.38	438	29	0	6	443	1443	1006	0	638
XLOC_000481	NONHSAT151272.1	93.38	438	29	0	6	443	1443	1006	0	638
XLOC_000482	NONHSAT001624.2	94.29	210	11	1	32	241	273	65	1e-84	313
XLOC_000483	NONHSAT001713.2	94.08	456	25	2	1199	1654	459	6	0	674
XLOC_000483	NONHSAT001713.2	94.08	456	25	2	1199	1654	459	6	0	674
XLOC_000483	NONHSAT001713.2	94.08	456	25	2	1199	1654	459	6	0	674
XLOC_000483	NONHSAT001713.2	94.08	456	25	2	651	1106	459	6	0	674
XLOC_000484	NONHSAT001734.2	94.62	260	13	1	61	319	348	89	3e-86	319
XLOC_000484	NONHSAT001734.2	94.6	278	14	1	405	681	348	71	3e-94	347
XLOC_000485	NONHSAT080114.2	100	24	0	0	611	634	1037	1014	0.0006	48.1
XLOC_000487	NONHSAT151297.1	92.79	1263	68	6	49	1291	1293	34	0	1723
XLOC_000489	NONHSAT180147.1	100	34	0	0	1	34	1083	1050	4e-10	67.9
XLOC_000489	NONHSAT180147.1	100	34	0	0	1	34	1083	1050	6e-10	67.9
XLOC_000489	NONHSAT149938.1	94.74	76	4	0	58	133	290	365	2e-25	119
XLOC_000489	NONHSAT120308.2	89.43	265	28	0	712	976	1339	1075	1e-80	303
XLOC_000490	NONHSAT194388.1	92.59	81	6	0	472	552	2716	2796	6e-24	113
XLOC_000490	NONHSAT136617.2	88.68	265	27	2	1060	1323	626	364	3e-53	212
XLOC_000491	NONHSAT207766.1	82.95	88	15	0	320	407	553	640	1e-06	56
XLOC_000491	NONHSAT180108.1	90.29	278	26	1	339	616	432	156	1e-88	329
XLOC_000494	NONHSAT148627.1	93.08	419	29	0	1	419	562	980	8e-171	601
XLOC_000495	NONHSAT151354.1	95.86	145	6	0	167	311	248	104	4e-62	240
XLOC_000495	NONHSAT151354.1	96.15	156	6	0	1	156	245	90	9e-69	262
XLOC_000496	NONHSAT151356.1	95.06	81	4	0	26	106	81	1	1e-28	129
XLOC_000496	NONHSAT002070.2	95.38	65	3	0	88	152	592	656	1e-21	105
XLOC_000496	NONHSAT002070.2	93.42	76	5	0	81	156	581	656	2e-23	111
XLOC_000498	NONHSAT002185.2	88.34	489	34	3	338	810	1663	1182	3e-150	533
XLOC_000498	NONHSAT002185.2	89.42	539	34	3	1	523	1713	1182	3e-180	632
XLOC_000498	NONHSAT002191.2	93.75	144	8	1	249	392	674	532	4e-52	206
XLOC_000499	NONHSAT002185.2	91.83	257	21	0	279	535	305	49	4e-93	343
XLOC_000500	NONHSAT148665.1	95.78	332	14	0	223	554	9	340	2e-154	547
XLOC_000500	NONHSAT148665.1	95.7	465	18	1	225	687	1	465	0	757
XLOC_000500	NONHSAT148665.1	95.36	474	20	1	223	694	9	482	0	759
XLOC_000501	NONHSAT151397.1	99.03	411	4	0	1401	1811	550	140	0	783
XLOC_000502	NONHSAT002313.2	94.35	124	5	2	1	124	432	311	1e-42	174
XLOC_000506	NONHSAT024034.2	91.28	149	13	0	335	483	64	212	1e-47	192
XLOC_000507	NONHSAT002377.2	94.94	79	1	1	2	80	131	206	3e-26	121
XLOC_000508	NONHSAT173533.1	91.38	116	10	0	172	287	1626	1741	3e-35	151
XLOC_000509	NONHSAT151438.1	94.23	312	16	1	38	347	312	1	2e-131	470
XLOC_000509	NONHSAT151438.1	94.23	312	16	1	748	1057	312	1	5e-131	470
XLOC_000509	NONHSAT151438.1	94.23	312	16	1	744	1053	312	1	6e-131	470
XLOC_000509	NONHSAT151438.1	94.23	312	16	1	290	599	312	1	4e-131	470
XLOC_000510	NONHSAT153584.1	97.22	144	4	0	555	698	570	713	4e-66	254
XLOC_000510	NONHSAT153584.1	97.22	144	4	0	918	1061	570	713	6e-66	254
XLOC_000510	NONHSAT153584.1	97.22	144	4	0	16	159	570	713	9e-67	254
XLOC_000511	NONHSAT153586.1	96.03	151	5	1	7	157	1281	1430	1e-63	244
XLOC_000511	NONHSAT153586.1	96.03	151	5	1	7	157	1281	1430	1e-63	244
XLOC_000511	NONHSAT153586.1	96.08	153	5	1	7	159	1281	1432	1e-64	248
XLOC_000512	NONHSAT148728.1	96.08	255	10	0	318	572	496	750	4e-118	426
XLOC_000512	NONHSAT148728.1	96.08	255	10	0	318	572	496	750	6e-118	426
XLOC_000512	NONHSAT148728.1	96.08	255	10	0	318	572	496	750	6e-118	426
XLOC_000512	NONHSAT148728.1	96.08	255	10	0	318	572	496	750	6e-118	426
XLOC_000512	NONHSAT148728.1	96.52	575	19	1	1	575	177	750	0	973
XLOC_000512	NONHSAT002438.2	88.99	227	12	2	166	379	300	74	1e-67	258
XLOC_000512	NONHSAT002438.2	89.85	197	11	1	174	361	268	72	3e-62	240
XLOC_000513	NONHSAT153595.1	95.35	172	8	0	67	238	949	1120	8e-74	278
XLOC_000514	NONHSAT151462.1	92.86	154	11	0	7	160	456	303	1e-55	218
XLOC_000514	NONHSAT212615.1	89.36	47	5	0	577	623	1052	1098	7e-06	54
XLOC_000515	NONHSAT151474.1	95.06	263	13	0	292	554	264	2	8e-116	418
XLOC_000515	NONHSAT151474.1	95.11	266	13	0	293	558	267	2	1e-117	424
XLOC_000516	NONHSAT002557.2	93.07	866	51	6	1472	2330	1718	855	0	1199
XLOC_000516	NONHSAT002556.2	92.81	1001	62	7	1472	2464	1854	856	0	1364
XLOC_000516	NONHSAT002557.2	93.07	866	51	6	1472	2330	1718	855	0	1199
XLOC_000516	NONHSAT002557.2	93.07	866	51	6	1472	2330	1718	855	0	1199
XLOC_000518	NONHSAT002655.2	95.58	317	12	2	244	559	547	232	2e-140	502
XLOC_000518	NONHSAT002655.2	94.62	316	14	2	244	556	547	232	5e-133	478
XLOC_000518	NONHSAT002655.2	93.61	548	26	4	244	783	547	1	0	787
XLOC_000518	NONHSAT002655.2	94.48	145	7	1	24	167	232	88	3e-55	216
XLOC_000518	NONHSAT002658.2	96.69	151	5	0	309	459	306	156	4e-68	260
XLOC_000518	NONHSAT002658.2	96.43	112	4	0	451	562	306	195	3e-47	190
XLOC_000518	NONHSAT002658.2	96.5	143	5	0	451	593	301	159	3e-63	244
XLOC_000520	NONHSAT002679.2	95.5	400	18	0	587	986	2645	3044	0	650
XLOC_000521	NONHSAT002711.2	95.67	901	35	2	547	1443	1458	558	0	1465
XLOC_000523	NONHSAT069821.2	92.4	263	20	0	4477	4739	1553	1815	4e-98	363
XLOC_000523	NONHSAT211573.1	89.81	265	24	1	987	1248	1708	1444	2e-81	307
XLOC_000523	NONHSAT211573.1	89.81	265	24	1	987	1248	1708	1444	2e-81	307
XLOC_000523	NONHSAT211573.1	89.81	265	24	1	987	1248	1708	1444	2e-81	307
XLOC_000523	NONHSAT211573.1	89.81	265	24	1	987	1248	1708	1444	2e-81	307
XLOC_000523	NONHSAT002723.2	88.94	208	23	0	628	835	677	470	2e-58	230
XLOC_000524	NONHSAT151507.1	94.44	288	15	1	1	288	790	504	2e-121	436
XLOC_000525	NONHSAT144196.2	100	23	0	0	254	276	1108	1086	0.0008	46.1
XLOC_000526	NONHSAT151511.1	88.8	125	10	1	40	164	436	316	7e-31	135
XLOC_000527	NONHSAT002799.2	95.83	48	2	0	801	848	144	97	1e-13	79.8
XLOC_000527	NONHSAT002798.2	94.74	95	5	0	799	893	174	80	2e-34	149
XLOC_000528	NONHSAT002827.2	94.9	529	22	1	247	770	739	211	0	835
XLOC_000529	NONHSAT002829.2	96.06	686	21	3	153	833	823	139	0	1128
XLOC_000529	NONHSAT002829.2	95.15	495	19	2	153	643	823	330	0	781
XLOC_000532	NONHSAT002942.2	94.66	262	14	0	1	262	498	237	2e-112	408
XLOC_000532	NONHSAT002942.2	93.62	345	22	0	1	345	498	154	7e-143	509
XLOC_000532	NONHSAT002942.2	93.62	345	22	0	1	345	498	154	3e-143	509
XLOC_000532	NONHSAT002942.2	94.66	262	14	0	1	262	498	237	1e-112	408
XLOC_000532	NONHSAT002942.2	93.62	345	22	0	1	345	498	154	4e-143	509
XLOC_000532	NONHSAT002942.2	94.66	262	14	0	1	262	498	237	9e-113	408
XLOC_000534	NONHSAT187504.1	96.49	57	2	0	9	65	1167	1111	1e-18	97.6
XLOC_000537	NONHSAT148900.1	96.95	197	6	0	3	199	2442	2638	2e-93	343
XLOC_000537	NONHSAT148900.1	96.94	196	6	0	3	198	2442	2637	2e-92	341
XLOC_000539	NONHSAT168000.1	87.06	170	12	4	218	383	4761	4598	5e-33	143
XLOC_000540	NONHSAT139868.2	86.21	58	8	0	374	431	181	124	2e-05	52
XLOC_000542	NONHSAT151579.1	96.46	226	8	0	257	482	250	25	1e-105	385
XLOC_000542	NONHSAT151579.1	96.02	226	9	0	257	482	250	25	3e-103	377
XLOC_000542	NONHSAT151579.1	96.46	226	8	0	257	482	250	25	1e-105	385
XLOC_000542	NONHSAT151579.1	96.48	227	8	0	257	483	250	24	3e-106	387
XLOC_000542	NONHSAT151579.1	96.36	220	8	0	257	476	250	31	4e-102	373
XLOC_000542	NONHSAT003156.2	94.23	52	3	0	312	363	285	234	6e-14	79.8
XLOC_000542	NONHSAT003159.2	95	100	1	1	288	383	327	228	5e-37	157
XLOC_000542	NONHSAT003159.2	95.07	142	3	1	296	433	369	228	2e-57	224
XLOC_000542	NONHSAT003159.2	95.74	47	2	0	337	383	369	323	2e-13	77.8
XLOC_000542	NONHSAT201767.1	89.47	57	6	0	13	69	2309	2253	8e-10	65.9
XLOC_000544	NONHSAT218707.1	92.21	77	6	0	2	78	408	332	3e-21	105
XLOC_000545	NONHSAT148975.1	93.67	632	35	3	3	634	1	627	0	916
XLOC_000547	NONHSAT151650.1	95.61	228	7	2	60	284	905	678	3e-98	359
XLOC_000547	NONHSAT151650.1	95.98	323	13	0	799	1121	1663	1341	3e-151	537
XLOC_000547	NONHSAT151650.1	94.67	751	40	0	799	1549	1663	913	0	1172
XLOC_000547	NONHSAT151650.1	94.08	1098	54	5	799	1885	1663	566	0	1633
XLOC_000547	NONHSAT153705.1	94.85	990	35	4	1	987	3073	4049	0	1550
XLOC_000547	NONHSAT153705.1	93.1	1160	69	5	1014	2166	5651	6806	0	1637
XLOC_000547	NONHSAT153705.1	94.85	991	35	4	1	988	3073	4050	0	1552
XLOC_000547	NONHSAT153705.1	94.85	991	35	4	1	988	3073	4050	0	1552
XLOC_000547	NONHSAT153705.1	94.85	991	35	4	1	988	3073	4050	0	1552
XLOC_000547	NONHSAT153705.1	95.41	109	5	0	1	109	4740	4848	2e-43	176
XLOC_000547	NONHSAT151654.1	97.92	96	2	0	1181	1276	646	551	5e-42	174
XLOC_000547	NONHSAT151654.1	97.92	96	2	0	317	412	646	551	2e-42	174
XLOC_000547	NONHSAT151654.1	97.92	96	2	0	208	303	646	551	1e-42	174
XLOC_000547	NONHSAT151654.1	95.33	492	17	2	240	725	646	155	0	785
XLOC_000547	NONHSAT151261.1	100	25	0	0	180	204	170	194	7e-05	50.1
XLOC_000547	NONHSAT151654.1	97.92	96	2	0	349	444	646	551	2e-42	174
XLOC_000547	NONHSAT151261.1	100	25	0	0	180	204	170	194	0.0001	50.1
XLOC_000549	NONHSAT151653.1	93.92	181	11	0	1	181	464	284	8e-72	272
XLOC_000551	NONHSAT044237.2	86.25	80	11	0	138	217	773	852	1e-11	71.9
XLOC_000552	NONHSAT003493.2	92.68	41	3	0	361	401	707	747	2e-07	58
XLOC_000553	NONHSAT149003.1	90.75	281	24	1	31	311	1	279	1e-93	345
XLOC_000556	NONHSAT003560.2	94.56	349	13	1	1	349	480	138	1e-153	543
XLOC_000556	NONHSAT003560.2	94.56	349	13	1	1	349	480	138	2e-153	543
XLOC_000558	NONHSAT149050.1	95.12	82	4	0	1843	1924	1884	1965	1e-28	131
XLOC_000560	NONHSAT151702.1	96.06	127	5	0	1	127	844	718	6e-54	212
XLOC_000561	NONHSAT003618.2	95.83	48	2	0	172	219	427	380	6e-14	79.8
XLOC_000562	NONHSAT197508.1	93.59	78	5	0	25	102	120	43	7e-25	115
XLOC_000563	NONHSAT003717.2	98.23	113	2	0	235	347	1112	1000	1e-52	208
XLOC_000563	NONHSAT151736.1	98.21	112	2	0	235	346	1034	923	1e-51	206
XLOC_000564	NONHSAT003723.2	93.54	650	35	4	322	970	674	1317	0	930
XLOC_000565	NONHSAT151738.1	99.18	122	1	0	120	241	135	14	1e-60	234
XLOC_000565	NONHSAT003723.2	91.54	461	30	2	1112	1563	3374	3834	1e-170	603
XLOC_000565	NONHSAT003723.2	91.48	458	30	2	1112	1560	3374	3831	6e-169	597
XLOC_000566	NONHSAT003786.2	96.52	287	10	0	250	536	171	457	4e-137	490
XLOC_000568	NONHSAT168898.1	88.93	253	25	2	15	264	547	295	1e-69	266
XLOC_000569	NONHSAT193638.1	96.55	29	1	0	491	519	134	162	0.0001	50.1
XLOC_000569	NONHSAT193638.1	96.55	29	1	0	491	519	134	162	0.0001	50.1
XLOC_000573	NONHSAT149203.1	96.83	63	2	0	157	219	854	916	7e-22	109
XLOC_000574	NONHSAT041411.2	89.36	141	11	1	98	234	593	453	3e-37	159
XLOC_000574	NONHSAT151793.1	93.57	249	14	1	51	297	249	1	2e-98	361
XLOC_000574	NONHSAT151793.1	93.41	91	6	0	176	266	91	1	6e-30	133
XLOC_000574	NONHSAT151793.1	93.52	247	14	1	558	802	247	1	7e-97	357
XLOC_000574	NONHSAT151793.1	93.41	91	6	0	559	649	91	1	1e-29	133
XLOC_000574	NONHSAT151793.1	93.52	247	14	1	558	802	247	1	6e-97	357
XLOC_000574	NONHSAT151793.1	93.52	247	14	1	558	802	247	1	6e-97	357
XLOC_000574	NONHSAT151793.1	93.52	247	14	1	40	284	247	1	3e-97	357
XLOC_000574	NONHSAT151793.1	97.92	48	1	0	7	54	48	1	4e-16	87.7
XLOC_000574	NONHSAT188113.1	96.97	33	1	0	759	791	119	87	1e-06	58
XLOC_000574	NONHSAT188113.1	96.97	33	1	0	759	791	119	87	1e-06	58
XLOC_000574	NONHSAT188113.1	96.97	33	1	0	759	791	119	87	2e-06	58
XLOC_000574	NONHSAT188113.1	96.97	33	1	0	759	791	119	87	2e-06	58
XLOC_000574	NONHSAT188113.1	96.97	33	1	0	759	791	119	87	2e-06	58
XLOC_000574	NONHSAT188113.1	96.97	33	1	0	759	791	119	87	2e-06	58
XLOC_000574	NONHSAT188113.1	96.97	33	1	0	759	791	119	87	2e-06	58
XLOC_000574	NONHSAT189678.1	100	25	0	0	8	32	7505	7481	3e-05	50.1
XLOC_000575	NONHSAT149233.1	100	31	0	0	764	794	136	166	3e-08	61.9
XLOC_000577	NONHSAT004092.2	91.04	67	6	0	99	165	254	188	5e-16	85.7
XLOC_000578	NONHSAT192638.1	90.41	271	26	0	748	1018	1367	1637	6e-89	331
XLOC_000578	NONHSAT192638.1	90.41	271	26	0	748	1018	1367	1637	5e-89	331
XLOC_000579	NONHSAT151812.1	96.64	119	4	0	1	119	219	101	1e-51	204
XLOC_000580	NONHSAT004151.2	92.31	247	19	0	1	247	456	210	3e-92	339
XLOC_000582	NONHSAT151838.1	94.01	217	13	0	1	217	324	108	8e-89	327
XLOC_000583	NONHSAT072680.2	91.46	82	7	0	23	104	4	85	3e-22	107
XLOC_000586	NONHSAT151862.1	94.52	420	21	1	1	420	7827	7410	0	644
XLOC_000587	NONHSAT073077.2	88.42	190	20	1	578	767	252	65	1e-48	196
XLOC_000587	NONHSAT073077.2	88.42	190	20	1	578	767	252	65	1e-48	196
XLOC_000587	NONHSAT073077.2	88.42	190	20	1	578	767	252	65	1e-48	196
XLOC_000587	NONHSAT073077.2	88.42	190	20	1	578	767	252	65	1e-48	196
XLOC_000587	NONHSAT073077.2	88.42	190	20	1	578	767	252	65	2e-48	196
XLOC_000588	NONHSAT184235.1	89.55	268	26	1	937	1204	1041	776	2e-80	303
XLOC_000588	NONHSAT219843.1	90.85	284	25	1	3137	3419	1874	2157	4e-94	349
XLOC_000589	NONHSAT151869.1	98.19	882	16	0	12	893	1120	239	0	1622
XLOC_000590	NONHSAT151873.1	96.08	153	6	0	72	224	656	504	5e-67	256
XLOC_000590	NONHSAT151873.1	96.08	153	6	0	72	224	656	504	5e-67	256
XLOC_000590	NONHSAT151873.1	96.08	153	6	0	463	615	656	504	9e-67	256
XLOC_000590	NONHSAT151873.1	96.08	153	6	0	463	615	656	504	1e-66	256
XLOC_000590	NONHSAT151873.1	96.08	153	6	0	463	615	656	504	1e-66	256
XLOC_000590	NONHSAT151873.1	96.08	153	6	0	28	180	656	504	4e-67	256
XLOC_000590	NONHSAT151873.1	96.08	153	6	0	535	687	656	504	1e-66	256
XLOC_000592	NONHSAT151896.1	94.79	211	10	1	136	345	258	48	5e-87	323
XLOC_000592	NONHSAT151896.1	94.79	211	10	1	136	345	258	48	2e-87	323
XLOC_000592	NONHSAT004325.2	94.79	211	10	1	136	345	250	40	5e-87	323
XLOC_000592	NONHSAT004325.2	94.4	250	13	1	136	384	250	1	2e-103	377
XLOC_000592	NONHSAT004327.2	94.79	211	10	1	114	323	350	140	4e-87	323
XLOC_000592	NONHSAT151897.1	94.96	258	12	1	1	257	438	181	1e-110	400
XLOC_000592	NONHSAT174766.1	84.62	247	22	3	1	246	756	525	2e-38	163
XLOC_000593	NONHSAT004323.2	98.2	111	2	0	116	226	283	173	9e-52	204
XLOC_000594	NONHSAT004335.2	91.86	172	13	1	1	172	1218	1048	4e-57	222
XLOC_000595	NONHSAT004366.2	93.49	461	26	3	59	519	471	15	0	654
XLOC_000595	NONHSAT151904.1	96.41	195	7	0	128	322	433	239	1e-89	331
XLOC_000595	NONHSAT004366.2	93.49	461	26	3	128	588	471	15	0	654
XLOC_000595	NONHSAT004360.2	90.46	608	34	6	70	671	604	15	0	733
XLOC_000595	NONHSAT004370.2	95.29	679	27	4	46	724	674	1	0	1021
XLOC_000596	NONHSAT136306.2	85.71	63	9	0	391	453	487	425	5e-06	54
XLOC_000596	NONHSAT136306.2	85.71	63	9	0	394	456	487	425	5e-06	54
XLOC_000597	NONHSAT154036.1	90.91	44	4	0	405	448	477	520	1e-06	56
XLOC_000598	NONHSAT004404.2	93.71	668	41	1	592	1259	1128	462	0	983
XLOC_000598	NONHSAT151924.1	97.76	268	5	1	46	312	1259	992	2e-133	476
XLOC_000598	NONHSAT151924.1	96.36	604	20	2	299	901	1594	992	0	1007
XLOC_000598	NONHSAT151924.1	94.76	2615	108	6	1002	3613	3580	992	0	4014
XLOC_000598	NONHSAT151924.1	94.76	2616	108	6	1002	3614	3580	991	0	4016
XLOC_000598	NONHSAT004411.2	94.74	2622	109	6	1002	3620	2925	330	0	4020
XLOC_000598	NONHSAT151924.1	94.76	2615	108	6	1002	3613	3580	992	0	4014
XLOC_000600	NONHSAT004486.2	95.07	284	14	0	1	284	284	1	4e-126	452
XLOC_000601	NONHSAT004529.2	95.19	104	5	0	364	467	138	35	4e-40	167
XLOC_000601	NONHSAT004527.2	93.5	1385	77	4	2225	3608	1503	131	0	1963
XLOC_000602	NONHSAT126528.2	87.5	88	10	1	745	832	660	574	1e-13	79.8
XLOC_000602	NONHSAT126528.2	87.5	88	10	1	860	947	660	574	2e-13	79.8
XLOC_000602	NONHSAT126528.2	87.5	88	10	1	606	693	660	574	1e-13	79.8
XLOC_000602	NONHSAT126528.2	87.5	88	10	1	520	607	660	574	1e-13	79.8
XLOC_000603	NONHSAT151957.1	95.17	145	5	1	604	746	1108	964	1e-57	226
XLOC_000603	NONHSAT151957.1	95.17	145	5	1	812	954	1108	964	1e-57	226
XLOC_000603	NONHSAT151957.1	95.17	145	5	1	604	746	1108	964	1e-57	226
XLOC_000603	NONHSAT004614.2	89.61	356	18	3	1228	1564	434	79	6e-116	420
XLOC_000603	NONHSAT004614.2	89.61	356	18	3	1017	1353	434	79	5e-116	420
XLOC_000603	NONHSAT004614.2	89.61	356	18	3	479	815	434	79	3e-116	420
XLOC_000603	NONHSAT004609.2	94.67	338	18	0	337	674	713	376	2e-148	527
XLOC_000603	NONHSAT004609.2	94.67	338	18	0	337	674	713	376	2e-148	527
XLOC_000603	NONHSAT004609.2	94.67	338	18	0	337	674	713	376	3e-148	527
XLOC_000603	NONHSAT004614.2	89.1	321	16	3	355	656	434	114	3e-100	367
XLOC_000606	NONHSAT151967.1	91.98	424	19	2	32	441	430	8	7e-165	581
XLOC_000608	NONHSAT151987.1	95.65	46	2	0	642	687	261	216	2e-12	75.8
XLOC_000609	NONHSAT004731.2	92.72	151	10	1	3467	3617	2639	2490	2e-50	204
XLOC_000609	NONHSAT004731.2	92.57	148	10	1	3467	3614	2639	2493	1e-48	198
XLOC_000610	NONHSAT004731.2	98.26	575	10	0	1	575	764	190	0	1061
XLOC_000611	NONHSAT004768.2	94.57	129	7	0	337	465	126	254	3e-50	200
XLOC_000612	NONHSAT004783.2	90.57	1007	67	6	4	983	1225	220	0	1239
XLOC_000612	NONHSAT004783.2	90.57	1007	67	6	4	983	1225	220	0	1239
XLOC_000612	NONHSAT004783.2	90.58	1008	67	6	4	984	1225	219	0	1241
XLOC_000612	NONHSAT004783.2	89.54	1224	82	9	4	1184	1225	5	0	1413
XLOC_000613	NONHSAT215569.1	84.95	93	14	0	290	382	5549	5457	7e-12	73.8
XLOC_000614	NONHSAT202974.1	97.96	49	1	0	2	50	3201	3249	5e-17	89.7
XLOC_000616	NONHSAT179832.1	85.92	71	10	0	95	165	1112	1042	2e-08	61.9
XLOC_000616	NONHSAT179832.1	85.92	71	10	0	95	165	1112	1042	3e-08	61.9
XLOC_000616	NONHSAT179832.1	85.92	71	10	0	95	165	1112	1042	3e-08	61.9
XLOC_000616	NONHSAT149482.1	100	31	0	0	596	626	1	31	2e-08	61.9
XLOC_000616	NONHSAT149482.1	100	31	0	0	908	938	1	31	4e-08	61.9
XLOC_000619	NONHSAT098468.2	85.96	57	8	0	118	174	7077	7133	3e-05	50.1
XLOC_000621	NONHSAT005996.2	85.04	421	61	2	22	441	968	549	2e-69	266
XLOC_000621	NONHSAT005996.2	85.04	421	61	2	22	441	968	549	2e-69	266
XLOC_000621	NONHSAT006130.2	87	223	29	0	267	489	230	8	2e-53	212
XLOC_000622	NONHSAT154111.1	90.4	125	10	2	213	336	9	132	3e-31	137
XLOC_000622	NONHSAT154111.1	89.04	374	35	4	231	600	9	380	8e-107	389
XLOC_000623	NONHSAT036485.2	96.77	31	1	0	69	99	2819	2789	4e-06	54
XLOC_000624	NONHSAT208651.1	94.59	37	2	0	676	712	1125	1161	4e-07	58
XLOC_000624	NONHSAT029935.2	93.1	87	6	0	611	697	289	375	2e-27	125
XLOC_000624	NONHSAT004981.2	91.46	246	20	1	807	1051	37	282	7e-84	313
XLOC_000624	NONHSAT029935.2	93.33	90	6	0	297	386	289	378	2e-29	131
XLOC_000626	NONHSAT072980.2	84.38	256	38	1	132	387	784	1037	3e-45	184
XLOC_000627	NONHSAT190270.1	100	23	0	0	13	35	684	706	0.0005	46.1
XLOC_000628	NONHSAT182169.1	97.37	76	2	0	1	76	2339	2414	4e-30	135
XLOC_000628	NONHSAT005103.2	93.8	242	15	0	579	820	946	705	3e-98	361
XLOC_000628	NONHSAT182169.1	97.37	76	2	0	1	76	2339	2414	2e-30	135
XLOC_000628	NONHSAT005103.2	95.56	180	8	0	1	180	884	705	3e-78	293
XLOC_000628	NONHSAT005103.2	95.56	180	8	0	1	180	884	705	4e-78	293
XLOC_000628	NONHSAT005103.2	96.05	152	6	0	1	152	884	733	4e-66	254
XLOC_000629	NONHSAT005107.2	100	85	0	0	731	815	415	331	2e-40	168
XLOC_000630	NONHSAT005137.2	95.28	106	5	0	405	510	291	396	3e-41	170
XLOC_000631	NONHSAT094233.2	100	30	0	0	1	30	1787	1816	1e-07	60
XLOC_000631	NONHSAT094233.2	100	30	0	0	1	30	1787	1816	2e-07	60
XLOC_000632	NONHSAT152081.1	94.28	2658	118	13	3524	6161	2941	298	0	3889
XLOC_000634	NONHSAT152124.1	95.83	312	13	0	380	691	623	312	6e-145	515
XLOC_000635	NONHSAT005345.2	87.82	197	13	2	19	213	188	1	4e-51	202
XLOC_000636	NONHSAT023385.2	90.21	235	16	3	78	312	617	390	3e-70	268
XLOC_000636	NONHSAT023385.2	90.21	235	16	3	328	562	617	390	3e-70	268
XLOC_000636	NONHSAT023385.2	90.21	235	16	3	340	574	617	390	3e-70	268
XLOC_000636	NONHSAT023385.2	90.21	235	16	3	77	311	617	390	4e-70	268
XLOC_000636	NONHSAT023385.2	90.21	235	16	3	741	975	617	390	5e-70	268
XLOC_000638	NONHSAT152143.1	96.57	175	1	2	1	174	2574	2404	3e-77	289
XLOC_000639	NONHSAT005416.2	93.22	59	4	0	1	59	157	215	7e-16	85.7
XLOC_000639	NONHSAT152154.1	100	115	0	0	1	115	440	326	9e-59	228
XLOC_000643	NONHSAT006059.2	94.22	346	17	2	1	345	526	183	1e-144	513
XLOC_000644	NONHSAT154117.1	90.85	317	28	1	208	523	1986	2302	2e-107	391
XLOC_000644	NONHSAT152247.1	95.24	105	5	0	48	152	189	85	8e-41	168
XLOC_000646	NONHSAT201672.1	100	52	0	0	4	55	76	127	7e-21	103
XLOC_000647	NONHSAT152233.1	90.83	229	16	1	1	229	295	72	1e-76	287
XLOC_000648	NONHSAT005862.2	95.6	91	4	0	203	293	310	220	8e-35	149
XLOC_000648	NONHSAT005862.2	95.6	91	4	0	207	297	310	220	8e-35	149
XLOC_000648	NONHSAT005862.2	95.6	91	4	0	121	211	310	220	6e-35	149
XLOC_000649	NONHSAT152250.1	86.71	286	34	3	71	353	2508	2792	6e-51	202
XLOC_000650	NONHSAT152247.1	94.32	546	15	3	298	843	718	189	0	839
XLOC_000650	NONHSAT152247.1	95.62	160	6	1	298	457	718	560	5e-66	254
XLOC_000651	NONHSAT204167.1	96.09	128	5	0	211	338	197	324	1e-54	214
XLOC_000652	NONHSAT152278.1	95.19	208	9	1	373	579	438	231	9e-88	325
XLOC_000652	NONHSAT149702.1	96.17	183	7	0	873	1055	685	867	5e-82	307
XLOC_000652	NONHSAT152278.1	95.95	173	6	1	373	544	438	266	1e-73	280
XLOC_000652	NONHSAT152278.1	95.95	173	6	1	373	544	438	266	1e-73	280
XLOC_000652	NONHSAT006245.2	91.9	210	16	1	540	748	1681	1472	4e-72	274
XLOC_000655	NONHSAT152281.1	97.05	237	7	0	3	239	818	582	1e-114	414
XLOC_000655	NONHSAT152281.1	97.05	237	7	0	3	239	818	582	1e-114	414
XLOC_000656	NONHSAT152283.1	92.97	327	22	1	2178	2503	950	624	2e-104	383
XLOC_000657	NONHSAT219200.1	88.3	94	11	0	388	481	624	531	1e-19	99.6
XLOC_000658	NONHSAT223715.1	88.97	281	23	3	308	587	3014	3287	6e-79	297
XLOC_000661	NONHSAT191046.1	85.93	135	18	1	11	144	301	167	1e-22	109
XLOC_000662	NONHSAT149833.1	95.17	704	34	0	172	875	10226	10929	0	1092
XLOC_000662	NONHSAT149833.1	94.81	77	4	0	159	235	10226	10302	1e-26	121
XLOC_000662	NONHSAT149833.1	94.45	901	44	3	406	1302	10226	11124	0	1298
XLOC_000662	NONHSAT149833.1	94.37	871	42	5	1	867	9289	10156	0	1263
XLOC_000663	NONHSAT006627.2	91.25	160	11	1	41	197	392	233	5e-51	202
XLOC_000664	NONHSAT115729.2	100	29	0	0	160	188	390	362	1e-07	58
XLOC_000665	NONHSAT152397.1	95.36	323	15	0	1	323	533	211	9e-147	521
XLOC_000667	NONHSAT171851.1	93.75	48	3	0	58	105	482	435	2e-11	71.9
XLOC_000669	NONHSAT149905.1	89.59	269	28	0	1046	1314	743	1011	4e-83	311
XLOC_000669	NONHSAT149905.1	89.59	269	28	0	1041	1309	743	1011	4e-83	311
XLOC_000669	NONHSAT149905.1	90.04	281	28	0	999	1279	743	1023	3e-90	335
XLOC_000670	NONHSAT152413.1	95.28	508	24	0	2	509	649	142	0	817
XLOC_000672	NONHSAT010030.2	93.33	240	14	1	1	240	417	180	3e-83	309
XLOC_000673	NONHSAT153069.1	98.81	84	1	0	74	157	7	90	1e-37	159
XLOC_000674	NONHSAT209480.1	92.31	52	4	0	520	571	733	784	2e-11	71.9
XLOC_000675	NONHSAT157509.1	90.74	54	5	0	92	145	828	775	2e-10	67.9
XLOC_000675	NONHSAT016398.2	89.86	69	7	0	92	160	294	226	1e-14	81.8
XLOC_000676	NONHSAT150673.1	95	100	5	0	2938	3037	211	112	7e-37	159
XLOC_000676	NONHSAT150673.1	95	100	5	0	2850	2949	211	112	7e-37	159
XLOC_000676	NONHSAT174766.1	87.08	209	23	1	2191	2395	779	571	1e-48	198
XLOC_000676	NONHSAT150673.1	95.05	101	5	0	1953	2053	212	112	1e-37	161
XLOC_000676	NONHSAT150671.1	91.12	428	37	1	1	428	750	324	3e-152	539
XLOC_000677	NONHSAT150668.1	95.83	96	4	0	550	645	178	83	1e-37	159
XLOC_000678	NONHSAT198148.1	88.89	45	5	0	1	45	2775	2731	6e-05	50.1
XLOC_000679	NONHSAT203384.1	83.9	739	83	9	14	720	8860	9594	7e-141	504
XLOC_000680	NONHSAT211864.1	93.55	124	8	0	431	554	1811	1934	2e-44	182
XLOC_000680	NONHSAT009809.2	93.48	138	9	0	1606	1743	161	24	3e-50	202
XLOC_000680	NONHSAT009809.2	93.43	137	9	0	1606	1742	161	25	1e-49	200
XLOC_000681	NONHSAT009718.2	97.35	226	6	0	436	661	226	1	2e-110	400
XLOC_000681	NONHSAT009718.2	97.35	226	6	0	436	661	226	1	3e-110	400
XLOC_000681	NONHSAT150616.1	96.26	321	12	0	402	722	1069	749	1e-152	541
XLOC_000681	NONHSAT009718.2	97.35	226	6	0	436	661	226	1	3e-110	400
XLOC_000681	NONHSAT009718.2	97.35	226	6	0	436	661	226	1	3e-110	400
XLOC_000681	NONHSAT009718.2	97.35	226	6	0	436	661	226	1	3e-110	400
XLOC_000681	NONHSAT009718.2	97.35	226	6	0	436	661	226	1	3e-110	400
XLOC_000681	NONHSAT009713.2	98.42	253	4	0	562	814	288	36	4e-131	470
XLOC_000681	NONHSAT009710.2	96.28	565	17	1	403	967	577	17	0	952
XLOC_000681	NONHSAT009718.2	97.35	226	6	0	436	661	226	1	3e-110	400
XLOC_000681	NONHSAT150616.1	96.26	321	12	0	402	722	1069	749	2e-152	541
XLOC_000681	NONHSAT150616.1	96.26	321	12	0	402	722	1069	749	1e-152	541
XLOC_000681	NONHSAT009710.2	96.28	565	17	1	403	967	577	17	0	952
XLOC_000681	NONHSAT009718.2	97.35	226	6	0	436	661	226	1	3e-110	400
XLOC_000681	NONHSAT009709.2	95.43	175	8	0	1	175	221	47	1e-75	283
XLOC_000682	NONHSAT150610.1	92.27	233	18	0	202	434	817	585	8e-86	319
XLOC_000689	NONHSAT180591.1	90.38	260	25	0	5	264	2935	2676	3e-85	317
XLOC_000690	NONHSAT164664.1	91.3	805	50	7	1920	2716	793	1	0	981
XLOC_000691	NONHSAT150453.1	93.39	605	33	3	1435	2039	1797	1200	0	866
XLOC_000691	NONHSAT150453.1	93.39	605	33	3	1435	2039	1797	1200	0	866
XLOC_000695	NONHSAT216371.1	96.88	32	1	0	255	286	1439	1470	9e-07	56
XLOC_000696	NONHSAT009160.2	91.3	805	51	7	39	841	788	1	0	1009
XLOC_000696	NONHSAT009160.2	94.57	497	23	3	1	496	1132	639	0	749
XLOC_000696	NONHSAT009160.2	92.34	1149	69	8	1	1147	1132	1	0	1538
XLOC_000696	NONHSAT009160.2	92.1	1152	69	9	1	1150	1132	1	0	1516
XLOC_000697	NONHSAT009048.2	91.72	580	33	3	584	1148	681	102	0	722
XLOC_000697	NONHSAT009048.2	92.09	632	35	3	584	1200	681	50	0	809
XLOC_000698	NONHSAT150369.1	94.59	148	8	0	1	148	148	1	5e-59	230
XLOC_000699	NONHSAT148087.2	89.32	103	11	0	148	250	3852	3954	4e-25	117
XLOC_000699	NONHSAT148087.2	89.32	103	11	0	148	250	3852	3954	5e-25	117
XLOC_000699	NONHSAT154483.1	93.63	157	8	1	565	719	1209	1053	6e-50	200
XLOC_000700	NONHSAT009019.2	90.1	293	15	2	328	608	790	500	7e-98	359
XLOC_000701	NONHSAT008996.2	95.52	134	6	0	51	184	1054	1187	6e-56	218
XLOC_000702	NONHSAT000379.2	91.63	227	19	0	256	482	40	266	1e-79	299
XLOC_000705	NONHSAT158468.1	92.71	96	7	0	72	167	961	866	2e-30	135
XLOC_000706	NONHSAT008930.2	94.24	139	8	0	113	251	501	363	4e-54	212
XLOC_000707	NONHSAT008878.2	93.14	277	15	1	209	481	354	78	3e-109	396
XLOC_000707	NONHSAT008878.2	93.58	265	13	1	232	492	326	62	7e-107	389
XLOC_000707	NONHSAT150333.1	93.42	319	17	1	437	751	539	221	2e-129	464
XLOC_000709	NONHSAT133161.2	96.03	151	6	0	471	621	1371	1221	1e-65	252
XLOC_000709	NONHSAT133161.2	90.95	420	37	1	709	1127	455	36	4e-147	523
XLOC_000709	NONHSAT133161.2	94.44	180	10	0	253	432	1371	1192	3e-73	278
XLOC_000709	NONHSAT221011.1	88.89	414	45	1	1292	1704	1	414	3e-124	448
XLOC_000709	NONHSAT133161.2	90.91	418	37	1	709	1125	455	38	8e-146	519
XLOC_000709	NONHSAT133161.2	90.97	421	37	1	503	922	456	36	2e-147	525
XLOC_000709	NONHSAT221011.1	88.89	414	45	1	1250	1662	1	414	6e-124	448
XLOC_000709	NONHSAT133161.2	89.78	822	58	3	401	1198	1146	327	0	985
XLOC_000709	NONHSAT133161.2	90.91	418	37	1	709	1125	455	38	2e-145	519
XLOC_000709	NONHSAT221011.1	88.89	414	45	1	1280	1692	1	414	6e-124	448
XLOC_000709	NONHSAT221011.1	88.89	414	45	1	970	1382	1	414	5e-124	448
XLOC_000709	NONHSAT133161.2	92	275	19	1	409	680	868	594	1e-99	367
XLOC_000709	NONHSAT133161.2	90.91	418	37	1	709	1125	455	38	2e-145	519
XLOC_000709	NONHSAT221011.1	88.89	414	45	1	1047	1459	1	414	5e-124	448
XLOC_000710	NONHSAT191518.1	96.49	57	2	0	720	776	1904	1848	5e-19	97.6
XLOC_000711	NONHSAT214742.1	91.51	106	9	0	201	306	1783	1678	1e-31	139
XLOC_000711	NONHSAT214742.1	91.51	106	9	0	201	306	1783	1678	2e-31	139
XLOC_000712	NONHSAT139919.2	93.67	79	5	0	445	523	167	245	5e-25	117
XLOC_000716	NONHSAT008728.2	92.92	226	16	0	608	833	506	281	2e-86	321
XLOC_000716	NONHSAT008728.2	92.92	226	16	0	679	904	506	281	2e-86	321
XLOC_000716	NONHSAT008728.2	88.95	353	27	5	494	837	2043	1694	2e-99	365
XLOC_000716	NONHSAT008728.2	93.53	649	38	2	549	1195	2584	1938	0	942
XLOC_000716	NONHSAT008728.2	93.53	649	38	2	549	1195	2584	1938	0	942
XLOC_000717	NONHSAT150295.1	93.63	612	36	1	203	811	846	235	0	900
XLOC_000717	NONHSAT150295.1	93.63	612	36	1	203	811	846	235	0	900
XLOC_000719	NONHSAT150290.1	98.02	101	2	0	1	101	424	324	2e-45	184
XLOC_000720	NONHSAT008671.2	95.8	119	5	0	437	555	450	332	7e-49	196
XLOC_000721	NONHSAT015312.2	92.11	38	3	0	298	335	230	193	1e-05	52
XLOC_000722	NONHSAT211882.1	79.3	1517	262	20	3852	5338	6641	5147	3e-108	396
XLOC_000724	NONHSAT150263.1	89.24	474	30	1	3	455	492	19	5e-160	567
XLOC_000724	NONHSAT150259.1	93.97	779	47	0	1978	2756	779	1	0	1172
XLOC_000724	NONHSAT150259.1	93.97	779	47	0	1897	2675	779	1	0	1172
XLOC_000724	NONHSAT150259.1	93.97	779	47	0	1903	2681	779	1	0	1172
XLOC_000724	NONHSAT150259.1	93.97	779	47	0	2257	3035	779	1	0	1172
XLOC_000724	NONHSAT150263.1	88.89	486	33	1	7	471	504	19	3e-160	567
XLOC_000724	NONHSAT150259.1	93.97	779	47	0	1904	2682	779	1	0	1172
XLOC_000724	NONHSAT150259.1	93.41	1017	59	2	24	1040	1009	1	0	1481
XLOC_000725	NONHSAT169377.1	93.79	161	9	1	92	251	5910	5750	7e-60	232
XLOC_000726	NONHSAT022904.2	82.35	102	18	0	433	534	1241	1140	1e-07	60
XLOC_000727	NONHSAT194949.1	94.29	175	10	0	72	246	202	28	1e-70	268
XLOC_000729	NONHSAT008572.2	96.12	438	16	1	172	609	549	113	0	726
XLOC_000729	NONHSAT150252.1	94.25	87	4	1	411	497	197	112	2e-27	125
XLOC_000730	NONHSAT150244.1	95.76	118	5	0	2	119	374	257	2e-48	194
XLOC_000730	NONHSAT150244.1	94.39	196	11	0	2	197	374	179	6e-81	301
XLOC_000731	NONHSAT008567.2	92.52	214	12	1	1	214	682	473	3e-79	295
XLOC_000735	NONHSAT008505.2	91.93	1066	55	3	1	1041	1164	105	0	1415
XLOC_000735	NONHSAT008505.2	92.36	1125	55	3	1	1100	1164	46	0	1532
XLOC_000735	NONHSAT008499.2	92.4	1158	57	3	1	1133	1326	175	0	1582
XLOC_000735	NONHSAT008505.2	92.62	1166	55	3	1	1141	1164	5	0	1614
XLOC_000735	NONHSAT008504.2	92.67	1174	55	3	1	1149	1168	1	0	1629
XLOC_000735	NONHSAT008500.2	92.93	1344	64	3	11	1329	1341	4	0	1895
XLOC_000736	NONHSAT150184.1	94.56	147	8	0	179	325	335	189	9e-59	228
XLOC_000737	NONHSAT150179.1	95.74	188	8	0	223	410	664	477	4e-83	309
XLOC_000738	NONHSAT150179.1	98.81	84	1	0	77	160	257	174	4e-38	159
XLOC_000742	NONHSAT008295.2	95.08	1098	48	5	263	1357	1358	264	0	1663
XLOC_000746	NONHSAT008289.2	93.65	63	4	0	850	912	212	150	1e-17	93.7
XLOC_000748	NONHSAT150120.1	93.69	222	11	1	2	220	313	92	3e-88	325
XLOC_000749	NONHSAT150119.1	95.45	198	8	1	108	304	281	84	3e-84	313
XLOC_000750	NONHSAT150096.1	95.33	257	12	0	34	290	352	96	1e-114	414
XLOC_000751	NONHSAT133604.2	85.88	85	11	1	219	302	3573	3657	1e-09	65.9
XLOC_000752	NONHSAT007252.2	94.51	182	9	1	289	470	228	48	3e-72	274
XLOC_000752	NONHSAT007256.2	93.91	279	16	1	289	567	458	181	2e-113	410
XLOC_000753	NONHSAT154210.1	100	47	0	0	231	277	3005	3051	3e-18	93.7
XLOC_000755	NONHSAT214811.1	100	25	0	0	285	309	453	477	0.0005	50.1
XLOC_000755	NONHSAT214811.1	100	25	0	0	285	309	453	477	0.0005	50.1
XLOC_000756	NONHSAT223364.1	91.11	90	8	0	44	133	354	265	6e-25	115
XLOC_000758	NONHSAT194661.1	90.57	53	5	0	134	186	2293	2241	6e-10	65.9
XLOC_000759	NONHSAT179787.1	90.57	106	10	0	564	669	1495	1390	2e-28	131
XLOC_000760	NONHSAT001345.2	87.76	286	24	2	845	1129	2165	2440	5e-77	291
XLOC_000761	NONHSAT007450.2	93.67	158	10	0	38	195	207	50	1e-60	234
XLOC_000761	NONHSAT060841.2	94.29	35	2	0	211	245	288	254	9e-06	54
XLOC_000761	NONHSAT152515.1	92.31	91	7	0	215	305	228	138	1e-27	125
XLOC_000765	NONHSAT190368.1	88.64	44	5	0	562	605	885	842	0.0004	48.1
XLOC_000766	NONHSAT007615.2	94.56	294	12	2	387	676	1327	1034	2e-123	444
XLOC_000766	NONHSAT007615.2	94.58	295	12	2	449	739	1328	1034	5e-124	446
XLOC_000767	NONHSAT054868.2	89.47	57	6	0	983	1039	420	364	3e-09	65.9
XLOC_000768	NONHSAT152551.1	95.71	466	19	1	618	1083	1917	1453	0	757
XLOC_000768	NONHSAT007632.2	95.72	467	19	1	618	1084	1449	984	0	759
XLOC_000768	NONHSAT152552.1	95.71	466	19	1	618	1083	702	238	0	757
XLOC_000768	NONHSAT007632.2	95.73	468	19	1	618	1085	1449	983	0	761
XLOC_000768	NONHSAT152551.1	95.71	466	19	1	618	1083	1917	1453	0	757
XLOC_000768	NONHSAT152552.1	95.71	466	19	1	618	1083	702	238	0	757
XLOC_000768	NONHSAT152551.1	95.71	466	19	1	618	1083	1917	1453	0	757
XLOC_000768	NONHSAT152551.1	95.71	466	19	1	618	1083	1917	1453	0	757
XLOC_000769	NONHSAT152565.1	94.32	88	5	0	238	325	88	1	3e-30	135
XLOC_000769	NONHSAT152565.1	88.89	135	10	1	49	178	909	775	8e-35	149
XLOC_000769	NONHSAT152565.1	88.89	135	10	1	49	178	909	775	1e-34	149
XLOC_000769	NONHSAT007722.2	93.97	282	13	3	21	298	598	317	2e-111	402
XLOC_000769	NONHSAT152565.1	96.77	93	2	1	21	112	486	394	4e-36	153
XLOC_000770	NONHSAT007745.2	91.43	747	50	4	163	906	739	4	0	920
XLOC_000772	NONHSAT007755.2	95.66	507	19	2	191	696	640	136	0	817
XLOC_000773	NONHSAT195583.1	93.18	44	3	0	133	176	3166	3123	4e-09	63.9
XLOC_000775	NONHSAT154266.1	96.49	285	8	2	8	290	128	412	1e-131	470
XLOC_000777	NONHSAT007763.2	95.45	198	9	0	1910	2107	275	78	5e-86	321
XLOC_000778	NONHSAT201116.1	86.52	178	23	1	174	350	270	93	7e-36	155
XLOC_000778	NONHSAT027366.2	79.34	305	63	0	11	315	3878	3574	3e-21	105
XLOC_000778	NONHSAT027366.2	79.34	305	63	0	11	315	3878	3574	5e-21	105
XLOC_000778	NONHSAT007762.2	93.04	158	7	2	995	1152	452	299	5e-54	214
XLOC_000779	NONHSAT164329.1	83.76	234	32	3	47	279	1414	1642	2e-33	145
XLOC_000779	NONHSAT164329.1	83.76	234	32	3	47	279	1414	1642	2e-33	145
XLOC_000780	NONHSAT007794.2	96.36	110	4	0	84	193	546	437	2e-46	186
XLOC_000782	NONHSAT010818.2	91.35	370	32	0	1	370	491	122	3e-134	480
XLOC_000782	NONHSAT150905.1	92.13	178	14	0	354	531	372	195	1e-62	242
XLOC_000782	NONHSAT010818.2	90.65	310	29	0	354	663	431	122	2e-105	385
XLOC_000784	NONHSAT216107.1	93.75	32	2	0	54	85	1214	1183	0.0002	48.1
XLOC_000786	NONHSAT215888.1	92.11	114	9	0	1	114	6104	6217	2e-36	155
XLOC_000790	NONHSAT010677.2	98.33	60	1	0	50	109	732	791	3e-23	111
XLOC_000792	NONHSAT010633.2	95.71	233	9	1	20	252	232	1	1e-102	375
XLOC_000792	NONHSAT010633.2	95.71	233	9	1	20	252	232	1	8e-103	375
XLOC_000792	NONHSAT010633.2	95.71	233	9	1	20	252	232	1	8e-103	375
XLOC_000793	NONHSAT097833.2	92.42	66	4	1	103	168	152	88	2e-15	83.8
XLOC_000794	NONHSAT179435.1	90.3	165	16	0	1	165	1169	1005	2e-50	200
XLOC_000795	NONHSAT150861.1	100	33	0	0	450	482	124	92	1e-09	65.9
XLOC_000796	NONHSAT219996.1	88.52	244	28	0	81	324	10034	9791	1e-68	262
XLOC_000796	NONHSAT219996.1	88.52	244	28	0	81	324	10034	9791	1e-68	262
XLOC_000797	NONHSAT192221.1	92.62	271	20	0	2910	3180	23407	23137	7e-103	379
XLOC_000797	NONHSAT010538.2	90.08	867	83	3	5738	6602	866	1	0	1013
XLOC_000798	NONHSAT150839.1	97.96	49	1	0	684	732	93	45	1e-16	89.7
XLOC_000798	NONHSAT153242.1	97.4	77	2	0	687	763	3432	3508	6e-31	137
XLOC_000800	NONHSAT010485.2	92.94	3046	203	8	8	3049	3782	745	0	4107
XLOC_000801	NONHSAT010471.2	95.16	516	25	0	419	934	518	3	0	825
XLOC_000801	NONHSAT010471.2	95.16	516	25	0	356	871	518	3	0	825
XLOC_000801	NONHSAT010471.2	95.54	606	27	0	189	794	608	3	0	987
XLOC_000802	NONHSAT212535.1	88.49	139	16	0	112	250	1790	1652	2e-34	149
XLOC_000804	NONHSAT010292.2	92.79	222	16	0	647	868	576	797	2e-83	313
XLOC_000805	NONHSAT154765.1	94.79	211	11	0	181	391	2286	2076	1e-89	331
XLOC_000805	NONHSAT154765.1	94.91	216	11	0	181	396	2286	2071	1e-92	341
XLOC_000805	NONHSAT154765.1	94.74	209	11	0	181	389	2286	2078	7e-88	327
XLOC_000805	NONHSAT154765.1	94.88	215	11	0	181	395	2286	2072	2e-91	339
XLOC_000805	NONHSAT010292.2	95.26	211	9	1	33	242	812	1022	1e-89	331
XLOC_000806	NONHSAT150780.1	95.27	1312	56	2	18	1323	2205	894	0	2101
XLOC_000806	NONHSAT150780.1	95.27	1312	56	2	18	1323	2205	894	0	2101
XLOC_000806	NONHSAT150780.1	95.27	1310	56	2	18	1321	2205	896	0	2097
XLOC_000806	NONHSAT150780.1	95.27	1312	56	2	18	1323	2205	894	0	2101
XLOC_000807	NONHSAT123669.2	89.49	276	27	1	1693	1968	2488	2215	2e-82	311
XLOC_000808	NONHSAT193211.1	88.1	269	30	2	1941	2208	668	401	2e-68	264
XLOC_000811	NONHSAT153111.1	92.22	180	13	1	211	390	1	179	7e-51	202
XLOC_000812	NONHSAT010169.2	94.17	206	12	0	353	558	329	124	3e-84	313
XLOC_000813	NONHSAT214053.1	84.3	172	24	2	113	282	1902	1732	3e-24	113
XLOC_000814	NONHSAT075128.2	88.57	70	8	0	499	568	4973	4904	3e-12	75.8
XLOC_000816	NONHSAT150711.1	94.58	166	9	0	1	166	166	1	9e-68	258
XLOC_000816	NONHSAT150711.1	95.38	130	6	0	82	211	130	1	1e-53	210
XLOC_000817	NONHSAT192354.1	87.5	80	10	0	140	219	5866	5787	1e-13	79.8
XLOC_000818	NONHSAT140658.2	90.14	142	13	1	232	372	2572	2713	5e-39	163
XLOC_000819	NONHSAT150708.1	94.71	435	20	2	1	435	508	77	0	666
XLOC_000819	NONHSAT150708.1	94.58	424	20	2	1	424	508	88	0	644
XLOC_000821	NONHSAT080948.2	96.2	316	11	1	128	442	2	317	1e-147	523
XLOC_000821	NONHSAT080948.2	96.2	316	11	1	141	455	2	317	2e-147	523
XLOC_000822	NONHSAT189712.1	86.36	132	18	0	2460	2591	93	224	6e-25	119
XLOC_000824	NONHSAT080910.2	93.64	708	38	3	1116	1816	1831	2538	0	1031
XLOC_000825	NONHSAT080883.2	92.36	144	8	2	2124	2264	1	144	9e-45	184
XLOC_000826	NONHSAT080883.2	88.33	377	41	2	1	374	925	1301	4e-105	385
XLOC_000826	NONHSAT080883.2	91.55	142	12	0	1	142	1160	1301	8e-46	186
XLOC_000827	NONHSAT080876.2	93.09	1317	78	6	367	1672	2815	4129	0	1814
XLOC_000830	NONHSAT093885.2	90	250	22	1	828	1074	1864	1615	7e-78	293
XLOC_000830	NONHSAT093885.2	90	250	22	1	761	1007	1864	1615	2e-77	293
XLOC_000830	NONHSAT149752.1	90.62	96	8	1	276	370	406	311	1e-22	111
XLOC_000830	NONHSAT210796.1	86.21	58	8	0	1366	1423	7611	7668	5e-05	52
XLOC_000830	NONHSAT004512.2	91.44	222	19	0	1623	1844	3384	3163	3e-76	289
XLOC_000830	NONHSAT210796.1	86.21	58	8	0	527	584	7611	7668	2e-05	52
XLOC_000830	NONHSAT004512.2	91.44	222	19	0	842	1063	3384	3163	2e-76	289
XLOC_000830	NONHSAT210796.1	86.21	58	8	0	495	552	7611	7668	2e-05	52
XLOC_000831	NONHSAT002201.2	88.19	271	32	0	1574	1844	4440	4170	1e-74	283
XLOC_000834	NONHSAT080758.2	86.32	541	52	4	571	1101	292	820	5e-137	490
XLOC_000834	NONHSAT080758.2	86.32	541	52	4	346	876	292	820	4e-137	490
XLOC_000834	NONHSAT080758.2	86.32	541	52	4	411	941	292	820	5e-137	490
XLOC_000835	NONHSAT080752.2	90.6	1607	132	8	7	1607	1038	2631	0	1947
XLOC_000837	NONHSAT189937.1	92	100	8	0	962	1061	144	243	4e-30	135
XLOC_000837	NONHSAT158410.1	93.06	72	5	0	10	81	654	725	3e-21	103
XLOC_000837	NONHSAT080706.2	96.03	126	5	0	66	191	261	136	9e-53	210
XLOC_000839	NONHSAT216633.1	86.11	108	15	0	58	165	945	1052	2e-18	95.6
XLOC_000842	NONHSAT189911.1	96.45	591	21	0	175	765	1	591	0	952
XLOC_000843	NONHSAT132006.2	94.74	38	2	0	1559	1596	983	946	3e-07	60
XLOC_000844	NONHSAT080588.2	94.69	377	17	1	22	398	1	374	9e-166	585
XLOC_000844	NONHSAT080580.2	90.62	373	12	4	298	649	449	819	2e-130	468
XLOC_000846	NONHSAT190507.1	91.3	276	21	1	43	315	1898	1623	2e-96	353
XLOC_000847	NONHSAT080494.2	88.99	218	16	1	107	316	156	373	1e-64	248
XLOC_000848	NONHSAT189855.1	88.61	79	9	0	593	671	314	392	2e-15	85.7
XLOC_000849	NONHSAT189840.1	94.92	59	3	0	508	566	377	435	6e-18	93.7
XLOC_000850	NONHSAT080425.2	92.34	274	13	1	115	380	261	534	4e-105	383
XLOC_000851	NONHSAT189818.1	90.96	332	25	2	25	354	236	564	2e-113	410
XLOC_000853	NONHSAT137578.2	95.65	69	3	0	1	69	40	108	4e-24	113
XLOC_000858	NONHSAT189782.1	93.55	682	36	4	2312	2991	1590	2265	0	866
XLOC_000858	NONHSAT189782.1	93.55	682	36	4	1835	2514	1590	2265	0	866
XLOC_000858	NONHSAT189782.1	93.55	682	36	4	2651	3330	1590	2265	0	866
XLOC_000858	NONHSAT189782.1	93.55	682	36	4	2129	2808	1590	2265	0	866
XLOC_000858	NONHSAT080276.2	92.47	730	40	4	589	1303	1217	488	0	1001
XLOC_000858	NONHSAT080276.2	91.9	531	29	3	1210	1726	1018	488	0	710
XLOC_000859	NONHSAT080219.2	93.87	1712	86	6	5542	7238	1974	3681	0	2498
XLOC_000861	NONHSAT188841.1	92.15	395	28	3	230	621	115	509	3e-144	513
XLOC_000861	NONHSAT188841.1	92.23	399	28	3	221	616	115	513	1e-146	521
XLOC_000861	NONHSAT188841.1	92.23	399	28	3	332	727	115	513	1e-146	521
XLOC_000861	NONHSAT188841.1	92.23	399	28	3	215	610	115	513	1e-146	521
XLOC_000861	NONHSAT188841.1	88.28	418	27	4	215	629	115	513	2e-123	444
XLOC_000861	NONHSAT188841.1	92.16	204	14	2	215	416	115	318	9e-69	262
XLOC_000862	NONHSAT188867.1	93	243	17	0	252	494	579	337	4e-94	347
XLOC_000862	NONHSAT188864.1	90.79	152	14	0	249	400	3865	3714	2e-47	190
XLOC_000862	NONHSAT080105.2	91.67	48	3	1	236	283	152	106	7e-07	56
XLOC_000862	NONHSAT055369.2	96.77	31	1	0	414	444	858	888	4e-06	54
XLOC_000862	NONHSAT188866.1	93.94	198	12	0	1	198	198	1	1e-79	297
XLOC_000862	NONHSAT188864.1	90.79	152	14	0	53	204	3865	3714	1e-47	190
XLOC_000863	NONHSAT188830.1	96.46	113	3	1	1	113	2181	2070	7e-46	184
XLOC_000866	NONHSAT080546.2	83.33	360	42	6	2555	2896	7921	7562	2e-53	214
XLOC_000866	NONHSAT080546.2	83.33	360	42	6	2538	2879	7921	7562	2e-53	214
XLOC_000867	NONHSAT058809.2	100	33	0	0	95	127	717	685	2e-09	65.9
XLOC_000868	NONHSAT207166.1	93.33	105	6	1	111	214	1673	1569	4e-33	145
XLOC_000868	NONHSAT150114.1	93.82	178	11	0	1435	1612	248	71	2e-69	266
XLOC_000869	NONHSAT033338.2	93.33	45	3	0	466	510	3584	3540	1e-09	65.9
XLOC_000870	NONHSAT166329.1	91.6	381	27	3	573	950	1386	1764	2e-134	482
XLOC_000870	NONHSAT166329.1	91.6	381	27	3	550	927	1386	1764	2e-134	482
XLOC_000871	NONHSAT079899.2	90.99	577	45	3	1335	1911	814	1383	0	716
XLOC_000874	NONHSAT079758.2	94.1	390	17	2	381	764	343	732	3e-165	583
XLOC_000876	NONHSAT190282.1	94.68	188	10	0	306	493	544	357	3e-78	293
XLOC_000876	NONHSAT190282.1	94.68	188	10	0	268	455	544	357	3e-78	293
XLOC_000877	NONHSAT079622.2	92.48	319	21	1	263	578	973	1291	9e-122	438
XLOC_000877	NONHSAT079622.2	92.9	338	21	1	29	363	954	1291	3e-133	476
XLOC_000878	NONHSAT189628.1	99.57	235	1	0	1	235	17	251	1e-127	458
XLOC_000878	NONHSAT189628.1	99.51	206	1	0	1	206	46	251	2e-110	400
XLOC_000879	NONHSAT079548.2	95.94	689	14	7	1	678	936	1621	0	1076
XLOC_000880	NONHSAT079488.2	91.03	591	31	5	476	1054	298	878	0	745
XLOC_000880	NONHSAT079488.2	91.03	591	31	5	248	826	298	878	0	745
XLOC_000881	NONHSAT149964.1	90.48	42	4	0	1261	1302	564	605	6e-05	52
XLOC_000881	NONHSAT148760.1	88.35	266	28	1	401	666	12550	12288	5e-66	254
XLOC_000881	NONHSAT149964.1	90.48	42	4	0	1163	1204	564	605	6e-05	52
XLOC_000882	NONHSAT002922.2	100	37	0	0	1	37	2084	2048	1e-11	73.8
XLOC_000883	NONHSAT079414.2	93.43	578	34	1	55	628	1	578	0	842
XLOC_000884	NONHSAT189585.1	100	50	0	0	433	482	59	108	8e-20	99.6
XLOC_000885	NONHSAT079366.2	93.86	1189	57	10	115	1301	2458	3632	0	1673
XLOC_000885	NONHSAT079366.2	97.06	136	4	0	43	178	2458	2593	4e-61	238
XLOC_000886	NONHSAT211683.1	87.93	555	63	4	1512	2063	3622	3069	5e-151	537
XLOC_000886	NONHSAT211683.1	87.93	555	63	4	1510	2061	3622	3069	5e-151	537
XLOC_000887	NONHSAT189182.1	95.08	1341	63	3	526	1865	1556	218	0	2111
XLOC_000889	NONHSAT078078.2	90.25	790	64	4	100	881	188	972	0	942
XLOC_000890	NONHSAT112941.2	91.4	93	8	0	1	93	3187	3095	4e-26	121
XLOC_000890	NONHSAT087667.2	90.85	142	12	1	279	419	1830	1689	2e-41	170
XLOC_000890	NONHSAT189992.1	93.9	164	10	0	258	421	36	199	5e-64	246
XLOC_000890	NONHSAT211573.1	90.87	252	23	0	478	729	1695	1444	7e-85	317
XLOC_000890	NONHSAT087667.2	90.85	142	12	1	272	412	1830	1689	2e-41	170
XLOC_000890	NONHSAT148276.1	96.3	27	1	0	185	211	557	531	0.0005	46.1
XLOC_000890	NONHSAT197539.1	96.55	29	1	0	560	588	245	273	0.0001	50.1
XLOC_000890	NONHSAT197539.1	96.55	29	1	0	584	612	245	273	0.0001	50.1
XLOC_000890	NONHSAT189992.1	93.9	164	10	0	298	461	36	199	5e-64	246
XLOC_000891	NONHSAT181866.1	87.64	178	21	1	309	486	2743	2919	3e-41	170
XLOC_000892	NONHSAT078083.2	95.25	421	19	1	137	556	683	263	4e-164	579
XLOC_000893	NONHSAT188354.1	88.57	315	23	5	382	685	382	694	1e-84	315
XLOC_000893	NONHSAT188354.1	89.21	315	24	5	382	688	382	694	1e-87	325
XLOC_000893	NONHSAT188354.1	88.57	315	23	5	358	661	382	694	1e-84	315
XLOC_000893	NONHSAT196025.1	97.62	42	1	0	862	903	8865	8824	3e-12	75.8
XLOC_000893	NONHSAT188354.1	89.21	315	24	5	800	1106	382	694	2e-87	325
XLOC_000893	NONHSAT196025.1	97.62	42	1	0	541	582	8865	8824	2e-12	75.8
XLOC_000893	NONHSAT188354.1	89.14	313	24	5	208	512	384	694	1e-86	321
XLOC_000893	NONHSAT189197.1	96.47	170	6	0	416	585	404	235	4e-76	289
XLOC_000893	NONHSAT189197.1	96.47	170	6	0	567	736	404	235	4e-76	289
XLOC_000893	NONHSAT189197.1	96.47	170	6	0	488	657	404	235	4e-76	289
XLOC_000893	NONHSAT189197.1	96.47	170	6	0	567	736	404	235	4e-76	289
XLOC_000893	NONHSAT222678.1	88.49	278	27	4	1378	1651	803	527	1e-69	268
XLOC_000893	NONHSAT180555.1	85.8	176	23	2	55	229	41	215	8e-31	135
XLOC_000893	NONHSAT189197.1	96.47	170	6	0	526	695	404	235	4e-76	289
XLOC_000893	NONHSAT189197.1	96.47	170	6	0	428	597	404	235	4e-76	289
XLOC_000893	NONHSAT189197.1	96.47	170	6	0	426	595	404	235	4e-76	289
XLOC_000893	NONHSAT189197.1	96.47	170	6	0	500	669	404	235	4e-76	289
XLOC_000893	NONHSAT189197.1	96.47	170	6	0	405	574	404	235	4e-76	289
XLOC_000893	NONHSAT189197.1	96.47	170	6	0	325	494	404	235	4e-76	289
XLOC_000893	NONHSAT222678.1	88.49	278	27	4	1158	1431	803	527	1e-69	268
XLOC_000893	NONHSAT222678.1	88.49	278	27	4	840	1113	803	527	1e-69	268
XLOC_000894	NONHSAT186826.1	91.67	48	4	0	434	481	1671	1718	5e-09	63.9
XLOC_000895	NONHSAT217790.1	92.24	116	9	0	801	916	1408	1293	2e-37	159
XLOC_000895	NONHSAT217790.1	92.24	116	9	0	596	711	1408	1293	2e-37	159
XLOC_000896	NONHSAT188364.1	90.78	141	12	1	1	141	108	247	1e-40	168
XLOC_000896	NONHSAT188364.1	90.78	141	12	1	1	141	108	247	9e-41	168
XLOC_000896	NONHSAT188364.1	90.78	141	12	1	1	141	108	247	1e-40	168
XLOC_000897	NONHSAT131733.2	96.97	33	1	0	489	521	600	632	4e-07	58
XLOC_000898	NONHSAT036762.2	92.59	54	4	0	980	1033	2094	2147	3e-12	75.8
XLOC_000898	NONHSAT036762.2	92.59	54	4	0	583	636	2094	2147	2e-12	75.8
XLOC_000898	NONHSAT036762.2	92.59	54	4	0	569	622	2094	2147	2e-12	75.8
XLOC_000900	NONHSAT188377.1	92.71	288	21	0	210	497	5	292	3e-111	404
XLOC_000900	NONHSAT078249.2	95.44	439	14	3	1	437	756	322	0	694
XLOC_000901	NONHSAT191610.1	93.75	32	2	0	104	135	763	732	0.0001	48.1
XLOC_000902	NONHSAT188423.1	95.11	327	16	0	338	664	415	741	2e-146	521
XLOC_000904	NONHSAT069885.2	91.39	267	23	0	536	802	900	634	9e-94	347
XLOC_000906	NONHSAT189316.1	91.67	252	21	0	193	444	519	268	6e-90	333
XLOC_000907	NONHSAT078608.2	94.57	258	11	2	17	271	1	258	1e-106	387
XLOC_000908	NONHSAT171024.1	94.74	38	2	0	549	586	205	168	9e-08	60
XLOC_000909	NONHSAT201121.1	90.32	62	6	0	312	373	99	38	2e-12	75.8
XLOC_000909	NONHSAT201121.1	90.32	62	6	0	312	373	99	38	2e-12	75.8
XLOC_000910	NONHSAT188473.1	95.15	103	5	0	65	167	483	585	8e-40	165
XLOC_000915	NONHSAT193388.1	100	27	0	0	869	895	135	161	1e-05	54
XLOC_000916	NONHSAT183744.1	92.79	111	7	1	152	261	122	232	7e-35	149
XLOC_000917	NONHSAT182419.1	90.7	43	4	0	248	290	43	1	6e-06	54
XLOC_000917	NONHSAT211647.1	87.5	56	7	0	400	455	5727	5782	2e-06	56
XLOC_000917	NONHSAT211647.1	87.5	56	7	0	1218	1273	5727	5782	4e-06	56
XLOC_000917	NONHSAT211647.1	87.5	56	7	0	552	607	5727	5782	2e-06	56
XLOC_000917	NONHSAT189399.1	98.28	58	1	0	711	768	194	137	1e-21	107
XLOC_000918	NONHSAT078820.2	91.92	1040	66	6	5	1035	291	1321	0	1332
XLOC_000919	NONHSAT188511.1	92.3	1390	85	9	62	1434	127	1511	0	1838
XLOC_000920	NONHSAT078881.2	93.39	832	43	6	137	962	48	873	0	1178
XLOC_000920	NONHSAT078881.2	93.4	833	43	6	84	910	47	873	0	1179
XLOC_000920	NONHSAT078881.2	93.4	833	43	6	62	888	47	873	0	1179
XLOC_000920	NONHSAT078881.2	93.4	833	43	6	14	840	47	873	0	1179
XLOC_000921	NONHSAT127031.2	94.2	69	2	2	516	582	231	299	1e-16	89.7
XLOC_000922	NONHSAT197153.1	92.73	55	2	1	129	181	393	339	9e-12	71.9
XLOC_000922	NONHSAT078951.2	95.97	471	17	1	98	566	264	734	0	777
XLOC_000922	NONHSAT188545.1	93.48	368	24	0	158	525	1	368	9e-152	539
XLOC_000922	NONHSAT078950.2	94.76	668	34	1	217	884	358	1024	0	942
XLOC_000922	NONHSAT078951.2	95.97	472	17	1	492	961	263	734	0	779
XLOC_000922	NONHSAT078950.2	95.59	204	9	0	1	204	19	222	2e-90	333
XLOC_000922	NONHSAT078950.2	94.67	225	10	1	1	223	41	265	4e-94	345
XLOC_000922	NONHSAT078950.2	94.15	804	44	2	401	1202	222	1024	0	1110
XLOC_000922	NONHSAT078951.2	95.96	470	17	1	46	513	265	734	0	775
XLOC_000923	NONHSAT079029.2	91.33	542	35	8	3	536	1684	2221	0	646
XLOC_000923	NONHSAT079029.2	93.33	45	3	0	1	45	2178	2222	7e-10	65.9
XLOC_000925	NONHSAT188592.1	94.74	304	15	1	37	340	1	303	2e-130	468
XLOC_000926	NONHSAT181433.1	86.74	264	34	1	165	428	3522	3260	4e-61	238
XLOC_000926	NONHSAT188597.1	83.62	116	12	1	154	269	213	321	5e-15	83.8
XLOC_000926	NONHSAT181433.1	86.74	264	34	1	392	655	3522	3260	2e-61	238
XLOC_000927	NONHSAT189494.1	92.59	270	19	1	1215	1483	851	582	2e-100	369
XLOC_000927	NONHSAT189494.1	92.59	270	19	1	1090	1358	851	582	2e-100	369
XLOC_000927	NONHSAT189494.1	92.59	270	19	1	877	1145	851	582	1e-100	369
XLOC_000928	NONHSAT079114.2	95.29	297	13	1	347	643	118	413	3e-131	470
XLOC_000929	NONHSAT188607.1	93.7	349	22	0	36	384	1326	1674	8e-146	517
XLOC_000931	NONHSAT190218.1	91.34	543	45	2	353	895	561	1101	0	688
XLOC_000934	NONHSAT079168.2	86.24	109	15	0	1	109	89	197	3e-19	97.6
XLOC_000935	NONHSAT083965.2	88.81	134	15	0	15	148	526	659	2e-34	147
XLOC_000936	NONHSAT126571.2	96	75	3	0	857	931	3561	3487	3e-27	125
XLOC_000936	NONHSAT126571.2	96	75	3	0	887	961	3561	3487	3e-27	125
XLOC_000936	NONHSAT126571.2	96	75	3	0	654	728	3561	3487	2e-27	125
XLOC_000936	NONHSAT194117.1	96.81	188	5	1	1123	1310	1459	1645	5e-85	317
XLOC_000936	NONHSAT208156.1	89.31	131	13	1	513	643	2260	2389	9e-32	141
XLOC_000938	NONHSAT191952.1	97.78	360	8	0	153	512	686	1045	4e-173	609
XLOC_000939	NONHSAT191957.1	99.53	214	1	0	97	310	1	214	3e-115	416
XLOC_000939	NONHSAT191957.1	99.53	214	1	0	92	305	1	214	2e-115	416
XLOC_000939	NONHSAT191957.1	100	174	0	0	34	207	41	214	8e-94	345
XLOC_000941	NONHSAT193117.1	92.42	488	31	2	313	794	488	1	0	666
XLOC_000941	NONHSAT193117.1	92.42	488	31	2	82	563	488	1	0	666
XLOC_000941	NONHSAT193117.1	92.42	488	31	2	565	1046	488	1	0	666
XLOC_000941	NONHSAT193117.1	92.42	488	31	2	448	929	488	1	0	666
XLOC_000941	NONHSAT193117.1	92.42	488	31	2	102	583	488	1	0	666
XLOC_000942	NONHSAT192003.1	92.98	228	16	0	4	231	88	315	1e-87	325
XLOC_000942	NONHSAT192003.1	92.72	302	22	0	1	302	132	433	2e-117	424
XLOC_000944	NONHSAT083436.2	91.58	202	14	2	552	750	276	75	1e-65	252
XLOC_000944	NONHSAT141501.2	88.51	87	9	1	537	622	1172	1086	2e-15	85.7
XLOC_000944	NONHSAT083436.2	91.58	202	14	2	648	846	276	75	2e-65	252
XLOC_000945	NONHSAT159226.1	93.68	190	12	0	430	619	2358	2169	5e-62	240
XLOC_000946	NONHSAT192029.1	90.79	228	19	2	311	536	5	232	7e-71	270
XLOC_000947	NONHSAT083544.2	91.12	1137	78	4	107	1225	2903	4034	0	1342
XLOC_000949	NONHSAT212496.1	84.69	98	15	0	265	362	1637	1734	1e-12	75.8
XLOC_000950	NONHSAT083625.2	92.22	90	7	0	7	96	25	114	4e-27	123
XLOC_000950	NONHSAT174881.1	97.27	110	3	0	1279	1388	1708	1817	6e-48	194
XLOC_000950	NONHSAT174881.1	97.27	110	3	0	1484	1593	1708	1817	6e-48	194
XLOC_000951	NONHSAT148396.1	94.67	75	4	0	1	75	1780	1706	1e-24	117
XLOC_000952	NONHSAT192041.1	93.08	159	11	0	137	295	1375	1533	8e-59	228
XLOC_000953	NONHSAT204506.1	86.21	145	18	1	300	442	46	190	6e-27	123
XLOC_000955	NONHSAT083883.2	100	34	0	0	108	141	545	512	2e-10	67.9
XLOC_000957	NONHSAT083632.2	90.8	609	52	1	1	605	2729	3337	0	761
XLOC_000958	NONHSAT084360.2	91.14	745	51	6	4	738	2430	3169	0	896
XLOC_000960	NONHSAT158435.1	90	60	6	0	146	205	6635	6576	9e-12	71.9
XLOC_000961	NONHSAT192159.1	91.57	178	11	2	106	282	570	396	7e-57	222
XLOC_000962	NONHSAT084392.2	92.58	391	28	1	147	536	49	439	4e-139	496
XLOC_000963	NONHSAT084422.2	89	200	19	1	13	209	1	200	8e-56	218
XLOC_000963	NONHSAT084420.2	91.67	252	21	0	9	260	31	282	2e-90	333
XLOC_000964	NONHSAT084427.2	90.57	424	23	3	1	424	12	418	1e-148	527
XLOC_000965	NONHSAT222056.1	100	38	0	0	1	38	1003	966	1e-12	75.8
XLOC_000968	NONHSAT148964.1	92.86	42	3	0	753	794	799	840	2e-07	60
XLOC_000969	NONHSAT192179.1	93.1	3523	213	16	43	3542	173	3688	0	4916
XLOC_000969	NONHSAT192179.1	93.37	3695	215	16	3	3674	1	3688	0	5241
XLOC_000969	NONHSAT192179.1	93.53	1854	108	5	56	1899	172	2023	0	2698
XLOC_000969	NONHSAT192181.1	93.05	3441	209	16	48	3465	329	3762	0	4785
XLOC_000970	NONHSAT192182.1	93.2	206	14	0	70	275	559	764	2e-79	297
XLOC_000970	NONHSAT192182.1	94.16	154	9	0	60	213	559	712	9e-61	234
XLOC_000971	NONHSAT084546.2	94.48	145	8	0	64	208	209	353	7e-57	224
XLOC_000972	NONHSAT084551.2	93.85	423	24	1	1	423	43	463	1e-178	626
XLOC_000972	NONHSAT192182.1	90.35	456	25	2	1	456	2244	2680	2e-162	573
XLOC_000972	NONHSAT192182.1	88.24	357	23	2	416	772	2343	2680	6e-108	392
XLOC_000973	NONHSAT192189.1	97.75	178	4	0	1	178	481	658	5e-87	321
XLOC_000974	NONHSAT084588.2	94.92	413	20	1	53	465	195	606	0	644
XLOC_000974	NONHSAT084588.2	94.92	413	20	1	49	461	195	606	0	644
XLOC_000974	NONHSAT084588.2	94.92	413	20	1	49	461	195	606	0	644
XLOC_000974	NONHSAT084588.2	94.92	413	20	1	49	461	195	606	0	644
XLOC_000974	NONHSAT084588.2	94.92	413	20	1	49	461	195	606	0	644
XLOC_000974	NONHSAT084588.2	94.92	413	20	1	49	461	195	606	0	644
XLOC_000974	NONHSAT084588.2	94.92	413	20	1	49	461	195	606	0	644
XLOC_000974	NONHSAT084588.2	94.92	413	20	1	49	461	195	606	0	644
XLOC_000974	NONHSAT084588.2	94.92	413	20	1	49	461	195	606	0	644
XLOC_000974	NONHSAT084588.2	93.45	336	18	2	1	333	272	606	4e-134	480
XLOC_000975	NONHSAT084626.2	88.93	813	64	8	2034	2835	392	1189	0	795
XLOC_000976	NONHSAT084639.2	90.61	181	14	2	12	189	407	587	8e-53	210
XLOC_000976	NONHSAT084639.2	90.66	182	14	2	32	210	406	587	2e-53	212
XLOC_000977	NONHSAT084657.2	94.95	218	11	0	22	239	47	264	5e-94	345
XLOC_000977	NONHSAT084661.2	94.79	211	11	0	11	221	164	374	8e-90	331
XLOC_000977	NONHSAT192222.1	94.12	136	8	0	1	136	395	530	3e-52	206
XLOC_000977	NONHSAT204379.1	98.7	77	1	0	243	319	392	316	1e-33	145
XLOC_000977	NONHSAT192222.1	94.08	152	9	0	384	535	568	719	4e-59	230
XLOC_000980	NONHSAT171351.1	87.1	124	16	0	38	161	130	253	4e-26	119
XLOC_000981	NONHSAT166873.1	93.1	58	4	0	169	226	150	207	2e-15	83.8
XLOC_000982	NONHSAT084878.2	93.44	244	8	2	46	285	67	306	2e-96	353
XLOC_000984	NONHSAT193170.1	94.44	504	26	1	116	617	413	916	0	771
XLOC_000986	NONHSAT192284.1	94.2	345	17	3	63	404	1	345	2e-140	502
XLOC_000988	NONHSAT192863.1	94.55	55	3	0	1	55	422	368	5e-15	85.7
XLOC_000988	NONHSAT192863.1	93.02	43	3	0	1	43	410	368	7e-08	61.9
XLOC_000989	NONHSAT085070.2	94.15	376	20	2	223	597	76	450	4e-144	513
XLOC_000990	NONHSAT072980.2	94.04	151	9	0	831	981	968	818	3e-58	228
XLOC_000990	NONHSAT072980.2	93.92	181	11	0	1032	1212	968	788	4e-71	272
XLOC_000991	NONHSAT191794.1	100	25	0	0	2381	2405	1357	1381	0.0004	50.1
XLOC_000991	NONHSAT191794.1	100	25	0	0	1013	1037	1357	1381	0.0002	50.1
XLOC_000991	NONHSAT191794.1	100	25	0	0	2033	2057	1357	1381	0.0003	50.1
XLOC_000991	NONHSAT191794.1	100	25	0	0	2239	2263	1357	1381	0.0004	50.1
XLOC_000991	NONHSAT192313.1	100	150	0	0	60	209	1	150	7e-80	297
XLOC_000992	NONHSAT085122.2	97.4	77	2	0	40	116	1	77	1e-30	137
XLOC_000992	NONHSAT185071.1	88.81	277	31	0	559	835	3018	2742	1e-80	303
XLOC_000992	NONHSAT160797.1	88.19	127	15	0	687	813	112	238	2e-29	133
XLOC_000992	NONHSAT192328.1	94.39	214	10	1	23	234	1	214	1e-86	323
XLOC_000992	NONHSAT185071.1	88.81	277	31	0	278	554	3018	2742	8e-81	303
XLOC_000993	NONHSAT085132.2	95.59	68	3	0	5	72	414	347	3e-23	111
XLOC_000994	NONHSAT180882.1	89.83	59	6	0	129	187	280	222	5e-11	69.9
XLOC_000994	NONHSAT212863.1	100	39	0	0	1	39	3009	2971	3e-13	77.8
XLOC_000994	NONHSAT180882.1	89.83	59	6	0	216	274	280	222	6e-11	69.9
XLOC_000995	NONHSAT153653.1	91.15	226	20	0	90	315	328	553	4e-77	289
XLOC_000996	NONHSAT086649.2	91.35	2012	140	7	111	2090	2029	4038	0	2506
XLOC_000996	NONHSAT086649.2	91.35	2012	140	7	126	2105	2029	4038	0	2506
XLOC_000997	NONHSAT086658.2	95.2	750	25	2	1	749	36	775	0	1203
XLOC_000997	NONHSAT192352.1	93.26	193	10	3	1	192	374	564	5e-67	256
XLOC_000999	NONHSAT043887.2	88.89	45	5	0	200	244	358	402	7e-05	50.1
XLOC_000999	NONHSAT043887.2	88.89	45	5	0	47	91	358	402	5e-05	50.1
XLOC_001001	NONHSAT192374.1	93.61	407	26	0	303	709	157	563	8e-170	601
XLOC_001001	NONHSAT192374.1	93.61	407	26	0	681	1087	157	563	8e-170	601
XLOC_001002	NONHSAT168563.1	91.51	106	9	0	477	582	4954	4849	4e-31	139
XLOC_001003	NONHSAT086793.2	93.62	847	51	2	1373	2217	846	1	0	1237
XLOC_001004	NONHSAT008757.2	87.3	126	16	0	45	170	219	94	4e-27	123
XLOC_001005	NONHSAT194561.1	88.12	261	30	1	1	260	2547	2287	8e-69	264
XLOC_001006	NONHSAT022895.2	87.54	281	34	1	886	1166	840	1119	7e-71	272
XLOC_001007	NONHSAT086871.2	98.15	54	1	0	3	56	93	146	1e-19	99.6
XLOC_001008	NONHSAT192210.1	100	29	0	0	83	111	5838	5810	3e-07	58
XLOC_001009	NONHSAT087000.2	97.26	401	10	1	549	949	1193	1592	0	700
XLOC_001009	NONHSAT087000.2	97.26	401	10	1	556	956	1193	1592	0	700
XLOC_001010	NONHSAT087019.2	91.76	558	28	1	4	543	150	707	0	767
XLOC_001014	NONHSAT192460.1	91.35	185	15	1	5	189	18	201	3e-60	232
XLOC_001016	NONHSAT136381.2	91.58	190	15	1	441	630	1754	1942	1e-62	242
XLOC_001017	NONHSAT192989.1	95.75	612	22	3	64	672	3590	2980	0	985
XLOC_001017	NONHSAT192989.1	95.75	612	22	3	91	699	3590	2980	0	985
XLOC_001018	NONHSAT212567.1	97.22	36	1	0	15	50	505	540	5e-09	63.9
XLOC_001020	NONHSAT192999.1	88.66	776	73	6	360	1130	9836	9071	0	811
XLOC_001020	NONHSAT192999.1	90.62	448	40	2	360	807	9836	9391	5e-152	539
XLOC_001020	NONHSAT192999.1	88.65	775	73	6	342	1111	9835	9071	0	809
XLOC_001021	NONHSAT087353.2	92.62	244	18	0	1	244	50	293	3e-92	341
XLOC_001021	NONHSAT087353.2	92.62	244	18	0	1	244	50	293	4e-92	341
XLOC_001021	NONHSAT087358.2	94.03	201	12	0	956	1156	195	395	1e-80	303
XLOC_001021	NONHSAT087358.2	94.03	201	12	0	1181	1381	195	395	1e-80	303
XLOC_001021	NONHSAT087358.2	94.03	201	12	0	2298	2498	195	395	2e-80	303
XLOC_001021	NONHSAT087358.2	94.03	201	12	0	1198	1398	195	395	1e-80	303
XLOC_001021	NONHSAT087358.2	94.03	201	12	0	2315	2515	195	395	2e-80	303
XLOC_001021	NONHSAT087358.2	94.03	201	12	0	1997	2197	195	395	2e-80	303
XLOC_001021	NONHSAT087358.2	94.03	201	12	0	1997	2197	195	395	2e-80	303
XLOC_001021	NONHSAT087358.2	94.03	201	12	0	1997	2197	195	395	2e-80	303
XLOC_001021	NONHSAT087358.2	94.03	201	12	0	1997	2197	195	395	2e-80	303
XLOC_001021	NONHSAT087358.2	94.03	201	12	0	1666	1866	195	395	1e-80	303
XLOC_001021	NONHSAT087358.2	94.03	201	12	0	2657	2857	195	395	2e-80	303
XLOC_001021	NONHSAT087358.2	94.03	201	12	0	1505	1705	195	395	1e-80	303
XLOC_001021	NONHSAT087358.2	94.03	201	12	0	1718	1918	195	395	1e-80	303
XLOC_001021	NONHSAT087358.2	94.03	201	12	0	1712	1912	195	395	2e-80	303
XLOC_001021	NONHSAT192510.1	91.98	162	12	1	731	891	1282	1443	8e-53	210
XLOC_001021	NONHSAT192510.1	91.98	162	12	1	710	870	1282	1443	8e-53	210
XLOC_001023	NONHSAT222724.1	88.89	72	8	0	149	220	12281	12210	1e-13	79.8
XLOC_001024	NONHSAT165850.1	96.67	270	9	0	153	422	1199	930	3e-129	464
XLOC_001025	NONHSAT162847.1	96.77	31	1	0	58	88	1257	1287	2e-06	54
XLOC_001027	NONHSAT055738.2	96.97	33	1	0	790	822	2797	2829	7e-07	58
XLOC_001027	NONHSAT087388.2	94.06	404	24	0	254	657	1	404	2e-173	611
XLOC_001027	NONHSAT087388.2	94.06	404	24	0	1165	1568	1	404	4e-173	611
XLOC_001027	NONHSAT193024.1	94.83	232	10	1	360	589	495	264	7e-98	359
XLOC_001027	NONHSAT087388.2	94.04	470	28	0	273	742	1	470	0	710
XLOC_001027	NONHSAT087388.2	94.04	470	28	0	623	1092	1	470	0	710
XLOC_001027	NONHSAT098468.2	89.64	251	24	1	1055	1305	29867	30115	3e-65	252
XLOC_001027	NONHSAT087388.2	94.06	404	24	0	230	633	1	404	1e-173	611
XLOC_001027	NONHSAT087388.2	94.06	404	24	0	355	758	1	404	2e-173	611
XLOC_001027	NONHSAT087388.2	94.06	404	24	0	355	758	1	404	2e-173	611
XLOC_001027	NONHSAT087388.2	94.06	404	24	0	355	758	1	404	2e-173	611
XLOC_001027	NONHSAT087388.2	94.06	404	24	0	319	722	1	404	2e-173	611
XLOC_001027	NONHSAT087388.2	94.06	404	24	0	319	722	1	404	2e-173	611
XLOC_001027	NONHSAT087388.2	94.06	404	24	0	319	722	1	404	2e-173	611
XLOC_001027	NONHSAT087388.2	94.06	404	24	0	398	801	1	404	2e-173	611
XLOC_001027	NONHSAT087388.2	94.06	404	24	0	398	801	1	404	2e-173	611
XLOC_001027	NONHSAT192524.1	95	40	2	0	189	228	584	623	3e-09	63.9
XLOC_001029	NONHSAT087397.2	86.98	192	25	0	1	192	546	355	3e-45	182
XLOC_001030	NONHSAT144776.2	87.68	138	16	1	317	453	736	873	5e-29	131
XLOC_001030	NONHSAT144776.2	87.68	138	16	1	418	554	736	873	6e-29	131
XLOC_001032	NONHSAT191518.1	89.32	281	28	1	993	1273	1892	1614	9e-84	313
XLOC_001033	NONHSAT193054.1	91.79	268	22	0	235	502	344	77	2e-97	357
XLOC_001034	NONHSAT192588.1	91.07	448	35	5	455	899	1	446	3e-149	531
XLOC_001034	NONHSAT192588.1	91.07	448	35	5	394	838	1	446	3e-149	531
XLOC_001034	NONHSAT192588.1	91.07	448	35	5	160	604	1	446	3e-149	531
XLOC_001034	NONHSAT087520.2	91.62	489	39	2	493	979	5	493	2e-178	628
XLOC_001034	NONHSAT192588.1	91.07	448	35	5	166	610	1	446	3e-149	531
XLOC_001035	NONHSAT087519.2	91.8	1280	87	8	1077	2346	1891	3162	0	1556
XLOC_001036	NONHSAT222500.1	94.83	58	3	0	926	983	436	493	4e-17	91.7
XLOC_001036	NONHSAT222500.1	94.83	58	3	0	650	707	436	493	3e-17	91.7
XLOC_001037	NONHSAT159449.1	100	29	0	0	1414	1442	505	477	2e-06	58
XLOC_001038	NONHSAT094422.2	88.46	234	22	2	282	511	1203	971	4e-62	240
XLOC_001039	NONHSAT185379.1	95.18	83	4	0	1	83	45	127	4e-30	133
XLOC_001039	NONHSAT087544.2	93.65	63	4	0	1	63	145	207	4e-18	93.7
XLOC_001040	NONHSAT081040.2	93.65	315	17	2	1	313	358	45	3e-126	452
XLOC_001041	NONHSAT188392.1	83.21	131	22	0	736	866	4252	4122	3e-15	85.7
XLOC_001041	NONHSAT172608.1	92.22	90	6	1	677	765	1619	1708	3e-24	115
XLOC_001041	NONHSAT187988.1	84.62	91	14	0	284	374	2313	2223	9e-11	69.9
XLOC_001041	NONHSAT172608.1	92.22	90	6	1	425	513	1619	1708	2e-24	115
XLOC_001041	NONHSAT187988.1	84.27	89	14	0	44	132	2311	2223	7e-10	65.9
XLOC_001043	NONHSAT191014.1	91.6	131	11	0	559	689	340	470	1e-41	172
XLOC_001045	NONHSAT081013.2	84.54	97	9	2	1	95	1243	1151	5e-10	65.9
XLOC_001046	NONHSAT080958.2	89.51	162	15	2	173	334	844	685	6e-41	170
XLOC_001046	NONHSAT080958.2	89.51	162	15	2	173	334	844	685	6e-41	170
XLOC_001047	NONHSAT080950.2	92.84	1691	109	6	13	1693	1834	146	0	2323
XLOC_001047	NONHSAT080950.2	92.84	1691	109	6	13	1693	1834	146	0	2323
XLOC_001047	NONHSAT080950.2	92.84	1691	109	6	13	1693	1834	146	0	2323
XLOC_001047	NONHSAT080950.2	92.84	1691	109	6	13	1693	1834	146	0	2323
XLOC_001047	NONHSAT080950.2	92.84	1690	109	6	13	1692	1834	147	0	2321
XLOC_001047	NONHSAT080950.2	92.84	1691	109	6	13	1693	1834	146	0	2323
XLOC_001048	NONHSAT080912.2	93.68	585	33	3	1	581	665	81	0	844
XLOC_001049	NONHSAT171024.1	93.33	45	3	0	83	127	9838	9882	1e-09	65.9
XLOC_001050	NONHSAT080906.2	93.39	121	8	0	488	608	298	178	6e-43	176
XLOC_001050	NONHSAT080907.2	92.12	800	53	7	29	823	799	5	0	995
XLOC_001051	NONHSAT002201.2	88.89	108	10	1	352	457	5079	5186	2e-23	113
XLOC_001052	NONHSAT080870.2	89.91	466	46	1	136	601	420	884	2e-153	543
XLOC_001052	NONHSAT080870.2	88.49	799	73	6	1	785	242	1035	0	833
XLOC_001054	NONHSAT080846.2	85.78	654	63	2	133	756	3408	2755	6e-170	599
XLOC_001055	NONHSAT190584.1	90.23	348	33	1	15	361	2567	2220	5e-114	412
XLOC_001056	NONHSAT190582.1	95.45	198	9	0	1	198	562	365	2e-86	321
XLOC_001057	NONHSAT189144.1	90.51	158	14	1	222	379	3396	3240	7e-46	186
XLOC_001058	NONHSAT189145.1	94.03	268	16	0	1	268	721	454	1e-111	404
XLOC_001058	NONHSAT189145.1	94.03	268	16	0	1	268	721	454	2e-111	404
XLOC_001062	NONHSAT140498.2	90.8	87	8	0	356	442	1021	1107	9e-23	109
XLOC_001063	NONHSAT189939.1	94.29	35	2	0	156	190	836	870	8e-06	54
XLOC_001064	NONHSAT189120.1	93.76	1105	60	5	1	1103	1098	1	0	1570
XLOC_001065	NONHSAT189099.1	93.9	164	10	0	1	164	376	213	4e-64	246
XLOC_001066	NONHSAT189914.1	91.67	48	4	0	226	273	2	49	3e-09	63.9
XLOC_001067	NONHSAT080661.2	92.15	242	13	3	139	376	577	338	1e-83	311
XLOC_001069	NONHSAT189911.1	95.63	252	11	0	57	308	99	350	3e-114	412
XLOC_001070	NONHSAT175148.1	92.86	42	3	0	1154	1195	1949	1990	2e-07	60
XLOC_001070	NONHSAT175148.1	92.5	40	3	0	1787	1826	1949	1988	4e-06	56
XLOC_001071	NONHSAT080613.2	100	156	0	0	60	215	468	313	3e-83	309
XLOC_001072	NONHSAT080542.2	92.42	462	34	1	1055	1515	1	462	8e-179	630
XLOC_001074	NONHSAT149289.1	100	26	0	0	96	121	3108	3083	2e-05	52
XLOC_001076	NONHSAT080492.2	93.63	377	20	2	174	547	411	36	5e-154	545
XLOC_001077	NONHSAT189855.1	97.33	75	2	0	1	75	440	514	9e-30	133
XLOC_001077	NONHSAT189855.1	97.33	75	2	0	1	75	440	514	1e-29	133
XLOC_001078	NONHSAT190493.1	94.2	500	27	1	1	498	810	311	0	755
XLOC_001080	NONHSAT080374.2	95.83	144	5	1	272	415	721	579	7e-59	230
XLOC_001080	NONHSAT080374.2	95.83	144	5	1	272	415	721	579	8e-59	230
XLOC_001081	NONHSAT188951.1	94.89	176	9	0	419	594	3098	2923	2e-73	278
XLOC_001082	NONHSAT188951.1	96.52	374	13	0	1	374	2236	1863	0	638
XLOC_001084	NONHSAT080367.2	97.62	42	1	0	101	142	255	214	7e-13	75.8
XLOC_001085	NONHSAT080280.2	91.32	242	13	3	175	410	240	1	4e-80	299
XLOC_001085	NONHSAT080281.2	92.58	485	28	3	234	712	483	1	0	662
XLOC_001085	NONHSAT080281.2	93.98	249	15	0	234	482	483	235	1e-102	375
XLOC_001086	NONHSAT164551.1	86.07	201	22	2	2	196	378	178	1e-40	168
XLOC_001087	NONHSAT080017.2	94.82	966	46	4	687	1649	2026	1062	0	1392
XLOC_001087	NONHSAT080017.2	95.19	831	36	4	687	1514	2026	1197	0	1203
XLOC_001087	NONHSAT080017.2	95.19	831	36	4	687	1514	2026	1197	0	1203
XLOC_001087	NONHSAT080017.2	95.19	831	36	4	687	1514	2026	1197	0	1203
XLOC_001087	NONHSAT176754.1	91	100	9	0	2	101	2864	2765	3e-28	127
XLOC_001088	NONHSAT189728.1	96.23	159	6	0	215	373	189	347	1e-70	268
XLOC_001089	NONHSAT186734.1	86.32	285	38	1	1296	1580	2916	2633	1e-53	214
XLOC_001089	NONHSAT186734.1	86.32	285	38	1	1296	1580	2916	2633	1e-53	214
XLOC_001089	NONHSAT188810.1	93.29	686	41	3	2578	3258	756	71	0	975
XLOC_001089	NONHSAT079957.2	92.06	189	15	0	1	189	245	57	6e-67	256
XLOC_001089	NONHSAT079957.2	92.06	189	15	0	1	189	245	57	1e-66	256
XLOC_001089	NONHSAT079957.2	92.06	189	15	0	1	189	245	57	2e-66	256
XLOC_001089	NONHSAT079957.2	92.06	189	15	0	1	189	245	57	2e-66	256
XLOC_001089	NONHSAT188810.1	92.35	340	25	1	658	997	3150	2812	6e-128	460
XLOC_001089	NONHSAT188810.1	92.35	340	25	1	569	908	3150	2812	6e-128	460
XLOC_001089	NONHSAT188810.1	92.35	340	25	1	414	753	3150	2812	8e-128	460
XLOC_001089	NONHSAT188810.1	92.35	340	25	1	331	670	3150	2812	4e-128	460
XLOC_001089	NONHSAT188810.1	100	52	0	0	1	52	748	697	3e-21	103
XLOC_001089	NONHSAT189720.1	92.23	103	8	0	1	103	1692	1794	2e-32	141
XLOC_001090	NONHSAT190366.1	94.53	256	14	0	255	510	1657	1402	5e-109	396
XLOC_001091	NONHSAT056253.2	91.11	45	4	0	1077	1121	1034	990	1e-06	58
XLOC_001092	NONHSAT099405.2	96.43	28	1	0	616	643	264	237	0.0004	48.1
XLOC_001093	NONHSAT079900.2	92.89	394	28	0	1	394	624	231	9e-158	559
XLOC_001094	NONHSAT079858.2	93.05	561	22	4	1	551	1140	587	0	797
XLOC_001094	NONHSAT079856.2	92.7	1588	102	7	3	1587	4103	2527	0	2187
XLOC_001094	NONHSAT079856.2	92.7	1588	102	7	3	1587	4103	2527	0	2187
XLOC_001094	NONHSAT079856.2	92.7	1588	102	7	3	1587	4103	2527	0	2187
XLOC_001095	NONHSAT195627.1	90.91	44	4	0	78	121	462	419	2e-06	56
XLOC_001097	NONHSAT198399.1	92.31	39	3	0	1152	1190	4397	4359	2e-05	54
XLOC_001097	NONHSAT188780.1	96.52	230	8	0	1718	1947	230	1	2e-107	392
XLOC_001097	NONHSAT188780.1	98	150	3	0	1720	1869	150	1	1e-71	274
XLOC_001097	NONHSAT188780.1	94.23	1768	77	9	1	1757	2227	474	0	2573
XLOC_001097	NONHSAT188780.1	94.23	1768	77	9	1	1757	2227	474	0	2573
XLOC_001097	NONHSAT188780.1	94.23	1768	77	9	1	1757	2227	474	0	2573
XLOC_001098	NONHSAT150626.1	95.87	121	5	0	4946	5066	1884	2004	3e-49	200
XLOC_001098	NONHSAT160431.1	90.32	248	22	1	5694	5939	879	1126	1e-67	262
XLOC_001100	NONHSAT079645.2	96	75	3	0	178	252	349	423	1e-27	125
XLOC_001101	NONHSAT188709.1	97.08	308	9	0	67	374	650	343	2e-152	539
XLOC_001103	NONHSAT079594.2	90.68	322	18	3	1	322	546	237	1e-108	394
XLOC_001104	NONHSAT102897.2	100	23	0	0	248	270	1274	1252	0.0007	46.1
XLOC_001105	NONHSAT188682.1	97.73	44	1	0	205	248	86	43	4e-14	79.8
XLOC_001107	NONHSAT224142.1	89.55	335	34	1	97	431	5208	4875	5e-104	379
XLOC_001108	NONHSAT189181.1	95.79	190	8	0	106	295	602	413	3e-84	313
XLOC_001108	NONHSAT078054.2	95.81	191	8	0	106	296	847	657	8e-85	315
XLOC_001108	NONHSAT189181.1	94.57	92	5	0	256	347	414	323	4e-33	143
XLOC_001114	NONHSAT078138.2	95	300	14	1	1066	1364	346	47	2e-130	468
XLOC_001114	NONHSAT078138.2	94.97	179	8	1	745	922	270	92	1e-72	276
XLOC_001114	NONHSAT078138.2	93.33	120	8	0	745	864	270	151	4e-42	174
XLOC_001114	NONHSAT078138.2	93.33	120	8	0	745	864	270	151	3e-42	174
XLOC_001114	NONHSAT189207.1	93.33	165	11	0	866	1030	1388	1224	8e-62	240
XLOC_001114	NONHSAT190003.1	97.56	82	2	0	105	186	1432	1513	2e-34	147
XLOC_001114	NONHSAT189207.1	95.08	244	12	0	1	244	1486	1243	3e-107	389
XLOC_001115	NONHSAT210288.1	100	27	0	0	37	63	2096	2122	8e-06	54
XLOC_001117	NONHSAT179865.1	88.95	181	14	2	1	177	667	489	4e-48	192
XLOC_001122	NONHSAT189258.1	92.62	244	18	0	812	1055	477	234	3e-92	341
XLOC_001122	NONHSAT189255.1	92.65	245	18	0	812	1056	666	422	8e-93	343
XLOC_001123	NONHSAT189266.1	97.3	74	2	0	7	80	2666	2593	3e-29	131
XLOC_001124	NONHSAT189323.1	93.76	657	21	4	136	788	1331	691	0	952
XLOC_001124	NONHSAT189323.1	95.79	642	22	3	136	773	1331	691	0	1013
XLOC_001124	NONHSAT078579.2	95.28	254	9	1	69	319	288	35	2e-106	387
XLOC_001126	NONHSAT197067.1	100	23	0	0	214	236	448	426	0.0006	46.1
XLOC_001128	NONHSAT010125.2	88.57	70	8	0	623	692	310	379	2e-12	75.8
XLOC_001128	NONHSAT189372.1	90.91	121	10	1	576	695	653	533	4e-33	145
XLOC_001128	NONHSAT189372.1	91.59	214	17	1	576	788	653	440	4e-72	274
XLOC_001128	NONHSAT189372.1	90.36	280	24	2	64	342	810	533	3e-88	327
XLOC_001128	NONHSAT189372.1	91.59	214	17	1	295	507	653	440	5e-72	274
XLOC_001129	NONHSAT189376.1	95.18	83	4	0	832	914	1114	1032	1e-29	133
XLOC_001130	NONHSAT189376.1	93.1	869	53	4	5	872	865	3	0	1150
XLOC_001130	NONHSAT189376.1	93.1	870	53	4	5	873	865	2	0	1152
XLOC_001130	NONHSAT189376.1	93.09	868	53	4	5	871	865	4	0	1148
XLOC_001130	NONHSAT037613.2	88.12	101	10	1	197	295	824	924	6e-20	99.6
XLOC_001130	NONHSAT102741.2	84.09	220	26	3	341	560	2293	2503	1e-33	147
XLOC_001131	NONHSAT188493.1	93.79	161	6	1	74	234	86	242	5e-61	238
XLOC_001131	NONHSAT188493.1	93.79	161	6	1	74	234	86	242	8e-61	238
XLOC_001131	NONHSAT078753.2	92.23	283	22	0	2502	2784	390	108	1e-105	387
XLOC_001131	NONHSAT078753.2	92	350	28	0	2396	2745	390	41	3e-131	472
XLOC_001131	NONHSAT078753.2	92.14	318	25	0	880	1197	390	73	1e-119	432
XLOC_001134	NONHSAT189426.1	94.34	106	5	1	1	105	161	56	1e-36	155
XLOC_001135	NONHSAT078914.2	93.89	573	32	3	1	571	747	176	0	835
XLOC_001136	NONHSAT078941.2	90.38	852	51	5	657	1490	3048	2210	0	993
XLOC_001136	NONHSAT078941.2	90.38	852	51	5	657	1490	3048	2210	0	993
XLOC_001137	NONHSAT190166.1	98.53	408	6	0	1	408	176	583	0	761
XLOC_001139	NONHSAT189501.1	93.25	415	26	2	171	584	814	401	7e-166	585
XLOC_001140	NONHSAT189504.1	92.65	272	19	1	1	271	525	254	2e-102	373
XLOC_001141	NONHSAT189511.1	90.78	217	16	2	199	414	297	84	3e-68	260
XLOC_001141	NONHSAT189511.1	90.64	299	24	2	272	569	297	2	7e-98	359
XLOC_001143	NONHSAT079124.2	90.19	316	15	4	1	303	313	1	2e-102	373
XLOC_001146	NONHSAT133491.2	97.22	36	1	0	164	199	551	516	2e-09	63.9
XLOC_001147	NONHSAT220586.1	94.42	197	11	0	1795	1991	707	511	4e-80	303
XLOC_001147	NONHSAT220586.1	94.42	197	11	0	1795	1991	707	511	5e-80	303
XLOC_001147	NONHSAT220586.1	94.42	197	11	0	1795	1991	707	511	4e-80	303
XLOC_001147	NONHSAT220586.1	94.42	197	11	0	1795	1991	707	511	5e-80	303
XLOC_001148	NONHSAT146937.2	91.53	354	30	0	5	358	501	148	2e-129	464
XLOC_001148	NONHSAT081137.2	95.09	265	13	0	1	265	2537	2273	8e-117	422
XLOC_001149	NONHSAT193078.1	88.64	88	10	0	196	283	102	189	7e-19	95.6
XLOC_001150	NONHSAT211290.1	90.7	172	16	0	84	255	1242	1413	2e-54	214
XLOC_001151	NONHSAT083413.2	91.91	346	23	2	423	764	1728	1384	9e-126	454
XLOC_001152	NONHSAT072098.2	90.33	269	25	1	796	1064	817	550	2e-74	283
XLOC_001153	NONHSAT192638.1	91.61	775	62	3	4	776	774	1	0	997
XLOC_001154	NONHSAT123172.2	86.52	141	19	0	486	626	7470	7610	2e-28	129
XLOC_001155	NONHSAT193113.1	87.95	473	29	3	1	462	1112	1567	9e-144	511
XLOC_001155	NONHSAT193113.1	87.95	473	29	3	1	462	1112	1567	1e-143	511
XLOC_001155	NONHSAT088761.2	90.15	274	24	2	334	605	756	1028	1e-84	315
XLOC_001156	NONHSAT191967.1	89.4	283	21	2	441	722	502	228	2e-86	321
XLOC_001156	NONHSAT191967.1	92.7	178	12	1	15	191	648	471	8e-49	194
XLOC_001157	NONHSAT192044.1	84.17	240	37	1	1	240	2527	2289	2e-40	167
XLOC_001158	NONHSAT083645.2	89.03	547	46	5	254	787	229	774	2e-166	587
XLOC_001159	NONHSAT074481.2	83.09	136	18	2	2	137	1322	1192	2e-13	77.8
XLOC_001159	NONHSAT083566.2	89.5	562	48	5	448	1003	1802	1246	8e-176	618
XLOC_001159	NONHSAT083568.2	91.85	785	61	3	527	1310	992	210	0	1025
XLOC_001159	NONHSAT083569.2	90.21	521	43	4	448	962	728	210	2e-171	605
XLOC_001159	NONHSAT083746.2	94.12	34	2	0	158	191	99	66	1e-05	52
XLOC_001160	NONHSAT083572.2	91.54	130	9	2	656	783	2026	1897	6e-36	155
XLOC_001161	NONHSAT013132.2	89.55	201	20	1	4136	4335	1583	1783	2e-56	224
XLOC_001162	NONHSAT032237.2	85	200	27	2	1	197	944	745	2e-33	145
XLOC_001163	NONHSAT118885.2	89.41	255	25	2	1266	1520	1051	799	3e-72	276
XLOC_001163	NONHSAT118885.2	89.41	255	25	2	1266	1520	1051	799	3e-72	276
XLOC_001163	NONHSAT118885.2	89.41	255	25	2	1266	1520	1051	799	3e-72	276
XLOC_001163	NONHSAT212496.1	84.69	98	15	0	258	355	1637	1734	2e-12	75.8
XLOC_001164	NONHSAT192041.1	98.31	118	2	0	6	123	1952	1835	7e-56	218
XLOC_001165	NONHSAT192671.1	97.45	275	7	0	39	313	371	97	1e-137	490
XLOC_001166	NONHSAT203666.1	97.44	78	2	0	1	78	3660	3737	1e-31	139
XLOC_001166	NONHSAT203666.1	97.44	78	2	0	1	78	3660	3737	2e-31	139
XLOC_001167	NONHSAT219747.1	83.81	278	37	2	1	275	4042	3770	4e-47	190
XLOC_001168	NONHSAT083656.2	91.8	793	58	3	1	786	748	1540	0	1041
XLOC_001168	NONHSAT083656.2	91.8	793	58	3	1	786	748	1540	0	1041
XLOC_001168	NONHSAT083656.2	91.79	792	58	3	1	785	748	1539	0	1039
XLOC_001168	NONHSAT083656.2	91.8	793	58	3	1	786	748	1540	0	1041
XLOC_001168	NONHSAT083656.2	91.8	793	58	3	1	786	748	1540	0	1041
XLOC_001169	NONHSAT083293.2	89.1	743	59	5	3	731	1825	1091	0	825
XLOC_001170	NONHSAT083939.2	93.58	265	15	2	1	264	355	92	6e-103	375
XLOC_001171	NONHSAT192707.1	94.36	195	10	1	179	372	404	210	8e-78	291
XLOC_001172	NONHSAT083927.2	92.81	139	10	0	4	142	227	89	5e-49	196
XLOC_001172	NONHSAT209069.1	85.29	68	10	0	300	367	221	288	1e-06	56
XLOC_001172	NONHSAT084423.2	82.86	105	18	0	609	713	119	15	2e-09	65.9
XLOC_001172	NONHSAT084423.2	87.6	121	11	2	516	632	288	168	2e-22	109
XLOC_001172	NONHSAT084423.2	82.86	105	18	0	110	214	119	15	6e-10	65.9
XLOC_001172	NONHSAT159168.1	85.9	234	24	2	7	239	1220	1445	2e-39	165
XLOC_001173	NONHSAT192155.1	93.85	715	42	2	488	1200	3776	3062	0	999
XLOC_001174	NONHSAT172656.1	100	27	0	0	806	832	1886	1860	9e-06	54
XLOC_001176	NONHSAT056215.2	100	31	0	0	651	681	710	740	3e-08	61.9
XLOC_001177	NONHSAT186085.1	85.24	271	40	0	118	388	6111	5841	5e-56	220
XLOC_001179	NONHSAT084438.2	91.54	449	29	3	186	632	561	120	2e-163	577
XLOC_001179	NONHSAT084438.2	92.78	263	17	2	186	446	382	120	1e-96	355
XLOC_001179	NONHSAT084416.2	90.85	306	24	1	184	485	2001	2306	4e-105	383
XLOC_001179	NONHSAT084438.2	92.78	263	17	2	34	294	382	120	7e-97	355
XLOC_001179	NONHSAT084433.2	92.83	265	17	2	248	510	356	92	7e-98	359
XLOC_001179	NONHSAT084436.2	92.46	544	32	3	155	696	551	15	0	741
XLOC_001180	NONHSAT192767.1	91.25	80	7	0	227	306	272	193	6e-21	103
XLOC_001181	NONHSAT192768.1	94.76	248	12	1	57	303	3942	3695	2e-104	381
XLOC_001182	NONHSAT084580.2	89.89	89	8	1	145	232	221	133	2e-19	97.6
XLOC_001183	NONHSAT084592.2	94.57	276	12	2	1	275	274	1	6e-115	414
XLOC_001185	NONHSAT192785.1	92.12	165	13	0	125	289	492	328	1e-57	224
XLOC_001186	NONHSAT084696.2	91.6	750	51	4	1	750	1128	391	0	971
XLOC_001188	NONHSAT084704.2	96.36	55	2	0	253	307	1319	1265	3e-18	93.7
XLOC_001189	NONHSAT118801.2	87.9	157	16	2	2	155	3362	3206	6e-34	147
XLOC_001190	NONHSAT084726.2	90.7	172	12	1	322	489	313	142	9e-54	212
XLOC_001192	NONHSAT084849.2	94.74	95	5	0	6	100	286	380	8e-35	149
XLOC_001193	NONHSAT200891.1	92.94	269	15	1	917	1181	1741	1473	7e-104	381
XLOC_001193	NONHSAT200891.1	92.94	269	15	1	917	1181	1741	1473	7e-104	381
XLOC_001194	NONHSAT171704.1	96.77	31	1	0	352	382	2123	2093	3e-06	54
XLOC_001195	NONHSAT084924.2	90.91	209	13	1	36	244	107	309	3e-70	266
XLOC_001196	NONHSAT084967.2	92.65	204	13	1	1	204	449	650	3e-74	280
XLOC_001197	NONHSAT059863.2	94	50	3	0	677	726	518	469	2e-12	75.8
XLOC_001198	NONHSAT192829.1	88.79	455	17	5	13	462	1594	1169	4e-145	515
XLOC_001198	NONHSAT192829.1	88.79	455	17	5	13	462	1594	1169	4e-145	515
XLOC_001199	NONHSAT193187.1	92.31	156	10	1	1	154	376	531	2e-52	208
XLOC_001199	NONHSAT193187.1	92.31	156	10	1	1	154	376	531	2e-52	208
XLOC_001199	NONHSAT193187.1	92.31	156	10	1	1	154	376	531	3e-52	208
XLOC_001199	NONHSAT193187.1	92.31	156	10	1	1	154	376	531	4e-52	208
XLOC_001199	NONHSAT085038.2	96.07	178	7	0	349	526	1223	1046	2e-79	297
XLOC_001199	NONHSAT085038.2	96.07	178	7	0	595	772	1223	1046	3e-79	297
XLOC_001200	NONHSAT223272.1	84.3	293	39	4	161	450	24846	25134	3e-47	190
XLOC_001200	NONHSAT223272.1	84.3	293	39	4	161	450	24846	25134	3e-47	190
XLOC_001201	NONHSAT125039.2	92.68	41	3	0	1	41	924	884	2e-07	58
XLOC_001202	NONHSAT085078.2	94.51	164	9	0	394	557	203	40	3e-66	254
XLOC_001203	NONHSAT123398.2	91.3	46	4	0	76	121	15010	15055	6e-08	60
XLOC_001205	NONHSAT192886.1	92.89	197	11	1	407	603	373	180	1e-72	276
XLOC_001206	NONHSAT193202.1	95.57	723	28	3	49	770	517	1236	0	1158
XLOC_001207	NONHSAT086592.2	91.36	660	53	2	1005	1660	556	1215	0	844
XLOC_001207	NONHSAT086592.2	91.36	660	53	2	1005	1660	556	1215	0	844
XLOC_001207	NONHSAT086592.2	91.36	660	53	2	1005	1660	556	1215	0	844
XLOC_001207	NONHSAT086592.2	91.36	660	53	2	1005	1660	556	1215	0	844
XLOC_001207	NONHSAT086592.2	91.36	660	53	2	1005	1660	556	1215	0	844
XLOC_001207	NONHSAT086592.2	91.36	660	53	2	1005	1660	556	1215	0	844
XLOC_001207	NONHSAT086592.2	91.36	660	53	2	1005	1660	556	1215	0	844
XLOC_001207	NONHSAT086592.2	91.36	660	53	2	1005	1660	556	1215	0	844
XLOC_001208	NONHSAT159343.1	100	26	0	0	1741	1766	427	452	7e-05	52
XLOC_001208	NONHSAT159343.1	100	26	0	0	428	453	427	452	2e-05	52
XLOC_001211	NONHSAT086629.2	94.92	433	17	2	867	1298	429	1	0	674
XLOC_001211	NONHSAT086629.2	94.92	433	17	2	596	1027	429	1	0	674
XLOC_001211	NONHSAT086629.2	94.92	433	17	2	590	1021	429	1	0	674
XLOC_001211	NONHSAT086629.2	94.92	433	17	2	846	1277	429	1	0	674
XLOC_001214	NONHSAT168677.1	90.91	99	9	0	42	140	62671	62769	4e-27	125
XLOC_001216	NONHSAT032140.2	95.08	264	12	1	2150	2413	385	123	2e-113	412
XLOC_001216	NONHSAT032140.2	95.02	261	12	1	2150	2410	385	126	1e-111	406
XLOC_001217	NONHSAT222539.1	89.87	227	21	2	758	984	777	1001	7e-65	252
XLOC_001217	NONHSAT222539.1	89.87	227	21	2	758	984	777	1001	6e-65	252
XLOC_001217	NONHSAT183265.1	91.64	287	23	1	1253	1539	2985	3270	1e-100	371
XLOC_001217	NONHSAT183265.1	91.64	287	23	1	1253	1539	2985	3270	1e-100	371
XLOC_001218	NONHSAT186427.1	86.81	235	29	2	2	234	5725	5959	1e-51	204
XLOC_001220	NONHSAT087048.2	97.15	281	8	0	219	499	316	36	2e-138	494
XLOC_001220	NONHSAT192947.1	94.63	615	32	1	405	1018	615	1	0	878
XLOC_001220	NONHSAT087047.2	96.83	379	12	0	219	597	699	321	0	656
XLOC_001220	NONHSAT192947.1	97.28	588	12	4	219	803	1107	521	0	965
XLOC_001220	NONHSAT192947.1	93.53	340	22	0	413	752	523	184	4e-140	500
XLOC_001221	NONHSAT087059.2	88.2	339	29	4	1	331	870	1205	2e-91	337
XLOC_001227	NONHSAT087180.2	100	25	0	0	326	350	28	4	5e-05	50.1
XLOC_001229	NONHSAT087310.2	96.83	284	8	1	133	415	611	328	1e-135	484
XLOC_001231	NONHSAT192516.1	91.28	321	20	1	1	321	1470	1782	1e-116	420
XLOC_001232	NONHSAT087375.2	90.83	349	23	2	40	379	99	447	3e-121	436
XLOC_001233	NONHSAT087379.2	88.61	913	68	6	92	969	950	39	0	997
XLOC_001234	NONHSAT127229.2	87.83	115	14	0	181	295	574	688	7e-25	117
XLOC_001236	NONHSAT192530.1	93.28	953	55	3	265	1217	1127	2070	0	1370
XLOC_001237	NONHSAT192530.1	96.55	29	1	0	6	34	2395	2423	5e-05	50.1
XLOC_001238	NONHSAT087394.2	91.52	1509	109	8	2256	3750	1754	251	0	1824
XLOC_001239	NONHSAT192303.1	89.09	55	6	0	63	117	21331	21277	9e-09	61.9
XLOC_001240	NONHSAT193032.1	88.62	325	36	1	565	888	390	66	7e-93	343
XLOC_001240	NONHSAT193032.1	88.62	325	36	1	565	888	390	66	9e-93	343
XLOC_001243	NONHSAT122447.2	90.08	121	12	0	638	758	3146	3026	2e-33	145
XLOC_001243	NONHSAT122447.2	89.68	126	13	0	603	728	3146	3021	8e-34	147
XLOC_002084	NONHSAT164330.1	98.41	63	1	0	5	67	1299	1361	3e-25	117
XLOC_002085	NONHSAT025395.2	93.12	1483	71	14	4585	6042	406	1882	0	1951
XLOC_002088	NONHSAT218906.1	93.91	115	7	0	39	153	1251	1365	9e-42	172
XLOC_002089	NONHSAT025510.2	91.62	191	14	2	235	424	190	1	2e-60	236
XLOC_002089	NONHSAT211366.1	91.67	48	4	0	371	418	358	311	1e-08	63.9
XLOC_002089	NONHSAT211366.1	91.67	48	4	0	336	383	358	311	9e-09	63.9
XLOC_002089	NONHSAT211366.1	91.67	48	4	0	515	562	358	311	1e-08	63.9
XLOC_002089	NONHSAT211366.1	91.67	48	4	0	349	396	358	311	1e-08	63.9
XLOC_002091	NONHSAT163210.1	91.61	429	34	2	42	470	1060	634	3e-155	549
XLOC_002095	NONHSAT161761.1	92.86	602	43	0	846	1447	3	604	0	852
XLOC_002095	NONHSAT161761.1	92.86	602	43	0	600	1201	3	604	0	852
XLOC_002095	NONHSAT161761.1	92.86	602	43	0	600	1201	3	604	0	852
XLOC_002095	NONHSAT025984.2	93.77	771	48	0	1272	2042	49	819	0	1148
XLOC_002095	NONHSAT025985.2	92.62	474	35	0	1602	2075	224	697	0	662
XLOC_002096	NONHSAT164357.1	97.73	88	2	0	1	88	1328	1415	6e-38	159
XLOC_002098	NONHSAT161781.1	98.75	80	1	0	194	273	54	133	2e-35	151
XLOC_002099	NONHSAT096018.2	90.59	510	34	3	918	1426	288	784	1e-178	628
XLOC_002099	NONHSAT096018.2	90.59	510	34	3	1574	2082	288	784	2e-178	628
XLOC_002100	NONHSAT026232.2	95.03	463	19	3	221	682	375	834	0	714
XLOC_002101	NONHSAT164384.1	93.85	179	11	0	414	592	18	196	2e-70	268
XLOC_002102	NONHSAT161835.1	92.19	64	5	0	1	64	790	853	1e-16	87.7
XLOC_002102	NONHSAT161835.1	89.04	228	16	1	61	279	936	1163	5e-69	262
XLOC_002103	NONHSAT193303.1	91.15	113	9	1	1	112	979	867	2e-31	137
XLOC_002104	NONHSAT164397.1	93.1	536	32	2	141	673	1348	1881	0	759
XLOC_002104	NONHSAT164397.1	93.1	536	32	2	110	642	1348	1881	0	759
XLOC_002104	NONHSAT164397.1	93.1	536	32	2	159	691	1348	1881	0	759
XLOC_002104	NONHSAT164397.1	93.1	536	32	2	360	892	1348	1881	0	759
XLOC_002104	NONHSAT164397.1	93.1	536	32	2	44	576	1348	1881	0	759
XLOC_002106	NONHSAT026925.2	91.39	1800	118	16	2	1771	12	1804	0	2010
XLOC_002107	NONHSAT026943.2	94.81	270	14	0	370	639	1	270	2e-117	424
XLOC_002108	NONHSAT158043.1	84.67	287	43	1	212	497	2928	2642	9e-54	212
XLOC_002110	NONHSAT163328.1	94.44	36	2	0	1	36	419	384	1e-06	56
XLOC_002112	NONHSAT156164.1	84.41	404	52	5	762	1159	996	598	1e-71	274
XLOC_002115	NONHSAT161896.1	94.93	611	18	5	1	610	422	1020	0	878
XLOC_002118	NONHSAT027209.2	94.17	240	13	1	216	454	5	244	2e-97	357
XLOC_002118	NONHSAT027209.2	94.17	240	13	1	262	500	5	244	2e-97	357
XLOC_002118	NONHSAT027209.2	94.17	240	13	1	265	503	5	244	2e-97	357
XLOC_002118	NONHSAT027208.2	98	150	3	0	344	493	487	636	5e-72	274
XLOC_002119	NONHSAT027212.2	92.5	80	6	0	50	129	352	431	1e-23	111
XLOC_002121	NONHSAT027296.2	95.58	317	13	1	4	319	96	412	2e-143	509
XLOC_002122	NONHSAT161961.1	96.92	325	9	1	136	460	145	468	1e-157	557
XLOC_002124	NONHSAT161985.1	95.58	181	8	0	58	238	751	931	3e-79	295
XLOC_002125	NONHSAT027420.2	96.55	87	3	0	366	452	110	196	6e-21	103
XLOC_002125	NONHSAT027420.2	96.55	87	3	0	366	452	110	196	7e-21	103
XLOC_002125	NONHSAT027424.2	93.08	679	42	5	488	1161	1	679	0	934
XLOC_002125	NONHSAT027424.2	93.08	679	42	5	466	1139	1	679	0	934
XLOC_002126	NONHSAT184745.1	91.67	84	7	0	528	611	169	86	3e-23	111
XLOC_002127	NONHSAT172183.1	85.71	217	28	1	1014	1227	3473	3689	7e-44	180
XLOC_002127	NONHSAT172183.1	85.71	217	28	1	519	732	3473	3689	4e-44	180
XLOC_002130	NONHSAT027691.2	93.91	197	11	1	72	267	370	566	1e-76	287
XLOC_002130	NONHSAT027691.2	92.28	298	21	1	2	297	60	357	8e-111	402
XLOC_002130	NONHSAT027691.2	91.7	253	16	2	1	248	314	566	6e-88	325
XLOC_002130	NONHSAT027691.2	93.91	197	11	1	215	410	370	566	2e-76	287
XLOC_002131	NONHSAT202475.1	91.41	454	36	2	147	600	9751	9301	2e-163	577
XLOC_002132	NONHSAT027707.2	92.8	250	13	2	40	284	1981	2230	2e-93	343
XLOC_002134	NONHSAT162070.1	94.82	309	10	2	144	446	21	329	8e-134	478
XLOC_002135	NONHSAT162071.1	95.68	139	6	0	1	139	5611	5749	6e-59	228
XLOC_002137	NONHSAT027771.2	93.03	1263	74	5	1802	3052	225	1485	0	1742
XLOC_002137	NONHSAT027771.2	93.03	1263	74	5	1817	3067	225	1485	0	1742
XLOC_002137	NONHSAT027771.2	93.03	1263	74	5	711	1961	225	1485	0	1742
XLOC_002137	NONHSAT027771.2	91.71	893	62	4	191	1073	225	1115	0	1126
XLOC_002137	NONHSAT125383.2	87.9	157	19	0	10	166	366	522	6e-38	161
XLOC_002138	NONHSAT027819.2	96.15	52	2	0	38	89	448	499	3e-16	87.7
XLOC_002139	NONHSAT200455.1	96.3	54	2	0	339	392	2549	2602	2e-17	91.7
XLOC_002142	NONHSAT027996.2	92.45	1047	65	7	165	1207	432	1468	0	1407
XLOC_002142	NONHSAT027996.2	92.45	1047	65	7	42	1084	432	1468	0	1407
XLOC_002142	NONHSAT027996.2	92.45	1047	65	7	463	1505	432	1468	0	1407
XLOC_002144	NONHSAT165123.1	90.2	51	5	0	308	358	4139	4189	1e-08	61.9
XLOC_002145	NONHSAT028083.2	97.41	116	3	0	60	175	1	116	5e-52	206
XLOC_002146	NONHSAT028116.2	95.35	129	6	0	1	129	573	701	7e-53	208
XLOC_002147	NONHSAT162175.1	90.83	109	8	1	100	206	274	382	2e-29	131
XLOC_002147	NONHSAT162175.1	90.65	107	8	1	68	172	274	380	4e-28	127
XLOC_002147	NONHSAT162175.1	90.83	109	8	1	79	185	274	382	2e-29	131
XLOC_002150	NONHSAT163534.1	97.66	171	4	0	507	677	433	263	4e-82	307
XLOC_002152	NONHSAT169584.1	92.91	282	19	1	3010	3290	1579	1298	1e-94	351
XLOC_002152	NONHSAT210789.1	96.67	30	1	0	3015	3044	9710	9739	0.0001	52
XLOC_002153	NONHSAT028299.2	92.95	156	11	0	683	838	1	156	2e-56	222
XLOC_002153	NONHSAT028299.2	92.95	156	11	0	515	670	1	156	2e-56	222
XLOC_002153	NONHSAT028299.2	92.95	156	11	0	401	556	1	156	1e-56	222
XLOC_002155	NONHSAT028330.2	92.67	232	11	1	1	232	262	487	2e-88	327
XLOC_002156	NONHSAT028350.2	92.08	240	15	1	74	313	105	340	6e-87	323
XLOC_002156	NONHSAT028350.2	92.12	241	15	1	286	526	104	340	2e-87	325
XLOC_002156	NONHSAT028350.2	92.08	240	15	1	66	305	105	340	6e-87	323
XLOC_002156	NONHSAT028350.2	92.12	241	15	1	9	249	104	340	1e-87	325
XLOC_002158	NONHSAT162231.1	94.94	1088	53	2	102	1188	2032	3118	0	1705
XLOC_002158	NONHSAT162231.1	94.94	1088	53	2	157	1243	2032	3118	0	1705
XLOC_002159	NONHSAT028580.2	88.25	570	44	4	566	1134	1	548	2e-155	551
XLOC_002159	NONHSAT028583.2	95.09	509	22	2	646	1153	1043	537	0	797
XLOC_002159	NONHSAT028583.2	95.47	397	15	2	111	506	931	537	1e-179	630
XLOC_002161	NONHSAT162241.1	94.35	248	14	0	165	412	132	379	3e-104	381
XLOC_002161	NONHSAT162241.1	93.77	385	18	2	211	595	1	379	1e-159	565
XLOC_002163	NONHSAT162246.1	95.92	147	6	0	52	198	89	235	5e-63	244
XLOC_002163	NONHSAT162246.1	95.92	147	6	0	133	279	89	235	5e-63	244
XLOC_002164	NONHSAT028698.2	93.36	422	21	3	1	420	132	548	3e-170	599
XLOC_002165	NONHSAT028699.2	93.58	483	28	2	1	480	1423	1905	0	698
XLOC_002166	NONHSAT054022.2	88.62	246	21	2	878	1117	6353	6109	9e-68	260
XLOC_002166	NONHSAT054022.2	88.62	246	21	2	713	952	6353	6109	8e-68	260
XLOC_002166	NONHSAT163602.1	94.81	751	31	3	842	1584	1872	1122	0	1166
XLOC_002167	NONHSAT163606.1	96.88	320	10	0	462	781	724	405	8e-157	555
XLOC_002169	NONHSAT168502.1	93.67	79	4	1	3	81	100	177	6e-23	109
XLOC_002171	NONHSAT028931.2	100	68	0	0	30	97	136	203	1e-30	135
XLOC_002173	NONHSAT029064.2	90	70	7	0	72	141	146	77	6e-15	83.8
XLOC_002173	NONHSAT174888.1	90.42	167	16	0	3	169	1102	1268	3e-51	204
XLOC_002175	NONHSAT029140.2	96.22	238	8	1	53	290	86	322	2e-108	392
XLOC_002176	NONHSAT029250.2	93.18	88	6	0	403	490	266	353	4e-28	127
XLOC_002177	NONHSAT029263.2	94.82	193	10	0	177	369	200	392	2e-81	303
XLOC_002181	NONHSAT027730.2	100	25	0	0	147	171	235	259	3e-05	50.1
XLOC_002183	NONHSAT029510.2	99.01	101	1	0	10	110	143	43	5e-47	192
XLOC_002184	NONHSAT029580.2	93.75	48	3	0	4	51	74	121	1e-11	71.9
XLOC_002185	NONHSAT162462.1	89.37	207	12	2	27	227	1	203	2e-60	236
XLOC_002186	NONHSAT029608.2	96.69	634	21	0	308	941	267	900	0	1090
XLOC_002186	NONHSAT029608.2	98.81	506	6	0	35	540	170	675	0	955
XLOC_002186	NONHSAT029608.2	96.7	637	21	0	45	681	264	900	0	1096
XLOC_002186	NONHSAT029608.2	96.69	634	21	0	123	756	267	900	0	1090
XLOC_002186	NONHSAT029608.2	96.68	633	21	0	72	704	268	900	0	1088
XLOC_002186	NONHSAT029608.2	96.69	634	21	0	105	738	267	900	0	1090
XLOC_002188	NONHSAT185710.1	82.29	175	31	0	40	214	734	908	1e-19	101
XLOC_002189	NONHSAT162467.1	92.91	141	6	1	306	442	76	216	1e-49	198
XLOC_002189	NONHSAT162467.1	92.91	141	6	1	237	373	76	216	9e-50	198
[truncated: 12,028 more rows]

## Sheet: Mouse
LncRNA	Mouse_LncRNA	Identity	Length	Mismatch	Gap	Q_start	Q_end	O_start	O_end	E-value	Score
XLOC_000002	NONMMUT092933.1	92.59	54	3	1	1420	1473	153	101	1e-09	67.9
XLOC_000002	NONMMUT092933.1	92.59	54	3	1	941	994	153	101	9e-10	67.9
XLOC_000002	NONMMUT092933.1	92.59	54	3	1	902	955	153	101	9e-10	67.9
XLOC_000002	NONMMUT092933.1	92.59	54	3	1	891	944	153	101	9e-10	67.9
XLOC_000008	NONMMUT041621.2	89.13	46	3	1	82	127	161	204	0.0004	46.1
XLOC_000009	NONMMUT121008.1	93.75	96	6	0	374	469	380	475	7e-33	143
XLOC_000013	NONMMUT068241.2	94.44	36	2	0	594	629	2379	2344	3e-06	56
XLOC_000015	NONMMUT087075.1	100	34	0	0	984	1017	70	37	1e-09	67.9
XLOC_000015	NONMMUT087075.1	100	34	0	0	1075	1108	70	37	1e-09	67.9
XLOC_000015	NONMMUT087075.1	100	34	0	0	957	990	70	37	1e-09	67.9
XLOC_000015	NONMMUT087075.1	100	34	0	0	1253	1286	70	37	1e-09	67.9
XLOC_000017	NONMMUT063034.2	91.3	46	4	0	797	842	2216	2171	2e-07	60
XLOC_000017	NONMMUT122916.1	97.5	40	1	0	1353	1392	2871	2910	1e-10	71.9
XLOC_000021	NONMMUT050856.2	89.02	173	19	0	270	442	307	479	8e-48	192
XLOC_000025	NONMMUT113458.1	81.32	257	48	0	5590	5846	793	537	1e-27	129
XLOC_000030	NONMMUT116030.1	90.75	281	26	0	505	785	281	1	6e-95	351
XLOC_000031	NONMMUT091716.1	91.53	59	4	1	207	265	1653	1596	2e-10	69.9
XLOC_000033	NONMMUT114317.1	100	27	0	0	1353	1379	757	731	2e-05	54
XLOC_000035	NONMMUT024060.2	93.75	32	2	0	1236	1267	792	761	0.0008	48.1
XLOC_000035	NONMMUT024060.2	93.75	32	2	0	1384	1415	792	761	0.0009	48.1
XLOC_000035	NONMMUT024060.2	93.75	32	2	0	1306	1337	792	761	0.0008	48.1
XLOC_000035	NONMMUT035303.2	96.43	28	1	0	75	102	1633	1606	0.0008	48.1
XLOC_000035	NONMMUT024060.2	93.75	32	2	0	777	808	792	761	0.0005	48.1
XLOC_000035	NONMMUT024060.2	93.75	32	2	0	716	747	792	761	0.0005	48.1
XLOC_000035	NONMMUT024060.2	93.75	32	2	0	748	779	792	761	0.0005	48.1
XLOC_000037	NONMMUT050607.2	89.15	378	26	3	620	996	774	1137	2e-117	424
XLOC_000039	NONMMUT002029.2	96.3	27	1	0	261	287	2680	2654	0.0008	46.1
XLOC_000039	NONMMUT002029.2	96.3	27	1	0	254	280	2680	2654	0.0008	46.1
XLOC_000039	NONMMUT002029.2	96.3	27	1	0	142	168	2680	2654	0.0005	46.1
XLOC_000039	NONMMUT002029.2	96.3	27	1	0	163	189	2680	2654	0.0006	46.1
XLOC_000039	NONMMUT002029.2	96.3	27	1	0	163	189	2680	2654	0.0006	46.1
XLOC_000039	NONMMUT002029.2	96.3	27	1	0	142	168	2680	2654	0.0005	46.1
XLOC_000045	NONMMUT047694.2	96.43	28	1	0	553	580	323	350	0.0004	48.1
XLOC_000045	NONMMUT047694.2	96.43	28	1	0	553	580	323	350	0.0004	48.1
XLOC_000045	NONMMUT047694.2	96.43	28	1	0	237	264	323	350	0.0002	48.1
XLOC_000045	NONMMUT006107.2	100	26	0	0	528	553	1751	1776	4e-05	52
XLOC_000045	NONMMUT006107.2	100	26	0	0	94	119	1751	1776	3e-05	52
XLOC_000045	NONMMUT006107.2	100	26	0	0	42	67	1751	1776	2e-05	52
XLOC_000046	NONMMUT122916.1	97.22	36	1	0	437	472	2908	2873	1e-08	63.9
XLOC_000048	NONMMUT115860.1	93.33	45	3	0	159	203	1738	1694	4e-10	65.9
XLOC_000052	NONMMUT104744.1	93.62	47	3	0	3065	3111	87	41	8e-10	69.9
XLOC_000053	NONMMUT129159.1	96.43	28	1	0	429	456	489	516	0.0002	48.1
XLOC_000057	NONMMUT111843.1	88.46	52	6	0	557	608	1314	1365	2e-06	56
XLOC_000057	NONMMUT111843.1	88.46	52	6	0	2002	2053	1314	1365	6e-06	56
XLOC_000058	NONMMUT015482.2	96.3	27	1	0	170	196	2199	2173	0.0005	46.1
XLOC_000060	NONMMUT104960.1	91.43	35	3	0	171	205	182	148	0.0004	46.1
XLOC_000061	NONMMUT070040.2	91.43	35	3	0	275	309	2102	2068	0.0007	46.1
XLOC_000062	NONMMUT098512.1	92.98	57	3	1	1180	1236	4114	4169	1e-11	73.8
XLOC_000067	NONMMUT068343.2	97.87	47	1	0	399	445	124	170	1e-15	85.7
XLOC_000068	NONMMUT014787.2	97.06	34	1	0	94	127	1941	1908	8e-08	60
XLOC_000071	NONMMUT122916.1	94.44	36	2	0	136	171	2873	2908	2e-06	56
XLOC_000072	NONMMUT117380.1	85.71	126	17	1	683	808	341	465	6e-19	99.6
XLOC_000073	NONMMUT080322.1	90.48	63	5	1	4048	4110	1069	1130	7e-10	69.9
XLOC_000073	NONMMUT118276.1	85.29	68	8	1	639	706	592	527	0.0001	50.1
XLOC_000073	NONMMUT118276.1	85.29	68	8	1	825	892	592	527	0.0001	50.1
XLOC_000073	NONMMUT118276.1	85.29	68	8	1	365	432	592	527	6e-05	50.1
XLOC_000073	NONMMUT118276.1	85.29	68	8	1	813	880	592	527	0.0002	50.1
XLOC_000075	NONMMUT057333.2	88	75	9	0	1	75	78	4	9e-13	77.8
XLOC_000077	NONMMUT070345.2	96.77	31	1	0	950	980	20	50	1e-05	54
XLOC_000078	NONMMUT087360.1	89.36	47	5	0	369	415	542	588	4e-06	54
XLOC_000078	NONMMUT087360.1	89.36	47	5	0	296	342	542	588	3e-06	54
XLOC_000082	NONMMUT070345.2	91.23	57	5	0	1041	1097	20	76	2e-11	73.8
XLOC_000089	NONMMUT021294.2	100	24	0	0	49	72	255	278	0.0004	48.1
XLOC_000089	NONMMUT021294.2	100	24	0	0	49	72	255	278	0.0003	48.1
XLOC_000089	NONMMUT122916.1	85.71	63	9	0	96	158	2846	2908	9e-06	54
XLOC_000094	NONMMUT070345.2	94.12	34	2	0	891	924	17	50	0.0001	52
XLOC_000094	NONMMUT070345.2	94.12	34	2	0	751	784	17	50	9e-05	52
XLOC_000094	NONMMUT070345.2	94.12	34	2	0	564	597	17	50	8e-05	52
XLOC_000101	NONMMUT136535.1	92.31	39	3	0	557	595	394	432	5e-06	54
XLOC_000104	NONMMUT070345.2	88.14	59	7	0	9	67	78	20	3e-08	61.9
XLOC_000104	NONMMUT070345.2	89.8	49	5	0	9	57	68	20	7e-07	58
XLOC_000104	NONMMUT064703.2	89.13	46	5	0	378	423	1428	1473	2e-05	52
XLOC_000112	NONMMUT048897.2	86.24	109	15	0	537	645	350	242	8e-19	97.6
XLOC_000112	NONMMUT048897.2	86.24	109	15	0	615	723	350	242	8e-19	97.6
XLOC_000112	NONMMUT048897.2	86.24	109	15	0	555	663	350	242	8e-19	97.6
XLOC_000112	NONMMUT048897.2	86.24	109	15	0	474	582	350	242	7e-19	97.6
XLOC_000112	NONMMUT048897.2	86.24	109	15	0	658	766	350	242	8e-19	97.6
XLOC_000117	NONMMUT048692.2	100	25	0	0	643	667	657	681	0.0002	50.1
XLOC_000117	NONMMUT048692.2	100	49	0	0	1	49	33	81	5e-19	97.6
XLOC_000117	NONMMUT048692.2	100	25	0	0	446	470	657	681	0.0001	50.1
XLOC_000118	NONMMUT117131.1	87.18	117	15	0	7	123	1	117	8e-24	113
XLOC_000120	NONMMUT136271.1	88.52	61	6	1	432	492	1526	1585	5e-07	58
XLOC_000121	NONMMUT036279.2	91.89	37	3	0	428	464	3414	3450	7e-05	50.1
XLOC_000122	NONMMUT128982.1	91.89	37	3	0	582	618	1579	1615	0.0002	50.1
XLOC_000122	NONMMUT128982.1	91.89	37	3	0	301	337	1579	1615	0.0001	50.1
XLOC_000126	NONMMUT067703.2	91.84	49	3	1	770	818	1528	1575	5e-07	58
XLOC_000129	NONMMUT070345.2	91.84	49	4	0	200	248	19	67	2e-09	65.9
XLOC_000145	NONMMUT114508.1	96.55	29	1	0	413	441	235	263	7e-05	50.1
XLOC_000148	NONMMUT107137.1	94.59	37	2	0	4263	4299	449	413	4e-06	58
XLOC_000148	NONMMUT014787.2	96.97	33	1	0	608	640	1940	1908	5e-07	58
XLOC_000148	NONMMUT014787.2	96.97	33	1	0	328	360	1940	1908	3e-07	58
XLOC_000148	NONMMUT107137.1	94.59	37	2	0	4287	4323	449	413	4e-06	58
XLOC_000158	NONMMUT127598.1	92.31	39	3	0	364	402	618	656	4e-06	54
XLOC_000158	NONMMUT127598.1	92.31	39	3	0	291	329	618	656	3e-06	54
XLOC_000158	NONMMUT127598.1	92.31	39	3	0	397	435	618	656	4e-06	54
XLOC_000161	NONMMUT107708.1	93.75	32	2	0	282	313	510	479	0.0002	48.1
XLOC_000166	NONMMUT106930.1	96.43	28	1	0	336	363	687	660	0.0003	48.1
XLOC_000166	NONMMUT104744.1	93.62	47	3	0	35	81	41	87	6e-11	69.9
XLOC_000167	NONMMUT114317.1	100	24	0	0	388	411	754	731	0.0003	48.1
XLOC_000169	NONMMUT002115.2	91.53	59	4	1	1980	2038	1801	1858	6e-10	69.9
XLOC_000169	NONMMUT002115.2	91.53	59	4	1	2012	2070	1801	1858	6e-10	69.9
XLOC_000177	NONMMUT113958.1	88.89	90	8	1	192	281	26	113	3e-18	93.7
XLOC_000177	NONMMUT045012.2	88.76	89	8	1	154	242	118	204	4e-17	91.7
XLOC_000177	NONMMUT113982.1	83.53	255	42	0	549	803	2758	3012	2e-41	172
XLOC_000177	NONMMUT113982.1	84.15	265	42	0	535	799	2758	3022	2e-47	192
XLOC_000177	NONMMUT113982.1	83.53	255	42	0	397	651	2758	3012	1e-41	172
XLOC_000177	NONMMUT113982.1	84.15	265	42	0	488	752	2758	3022	2e-47	192
XLOC_000177	NONMMUT113982.1	84.15	265	42	0	975	1239	2758	3022	2e-47	192
XLOC_000177	NONMMUT113982.1	83.53	255	42	0	962	1216	2758	3012	2e-41	172
XLOC_000181	NONMMUT083140.1	100	25	0	0	748	772	1459	1483	0.0001	50.1
XLOC_000185	NONMMUT036058.2	80.77	338	65	0	61	398	595	932	6e-24	113
XLOC_000185	NONMMUT036058.2	81.85	281	51	0	60	340	595	875	3e-23	111
XLOC_000186	NONMMUT071594.2	92.11	38	3	0	289	326	676	639	1e-05	52
XLOC_000187	NONMMUT104879.1	100	23	0	0	344	366	798	776	0.0008	46.1
XLOC_000190	NONMMUT073099.2	84.81	79	12	0	253	331	1	79	4e-08	61.9
XLOC_000193	NONMMUT015947.2	94.23	52	2	1	129	180	277	227	3e-11	71.9
XLOC_000195	NONMMUT033904.2	100	24	0	0	168	191	871	894	0.0003	48.1
XLOC_000199	NONMMUT044707.2	92.25	271	17	3	25	295	667	933	1e-94	349
XLOC_000205	NONMMUT032692.2	97.44	39	1	0	988	1026	19	57	3e-10	69.9
XLOC_000205	NONMMUT092933.1	91.67	60	4	1	383	442	93	151	9e-11	71.9
XLOC_000206	NONMMUT094109.1	94.44	36	2	0	198	233	3114	3149	1e-06	56
XLOC_000207	NONMMUT131734.1	89.47	57	5	1	127	183	13013	12958	7e-07	58
XLOC_000208	NONMMUT047488.2	96.97	33	1	0	253	285	56	88	2e-07	58
XLOC_000224	NONMMUT096553.1	92.11	38	3	0	394	431	408	371	6e-05	52
XLOC_000224	NONMMUT096553.1	92.11	38	3	0	281	318	408	371	5e-05	52
XLOC_000225	NONMMUT125574.1	91.67	36	3	0	755	790	380	345	0.0007	48.1
XLOC_000228	NONMMUT034034.2	84.38	64	10	0	40	103	196	259	0.0007	48.1
XLOC_000235	NONMMUT044213.2	90.96	177	8	3	3090	3262	2099	2271	3e-52	210
XLOC_000237	NONMMUT134600.1	96.3	27	1	0	18	44	169	195	0.0006	46.1
XLOC_000246	NONMMUT071230.2	91.67	36	3	0	187	222	634	669	0.0002	48.1
XLOC_000250	NONMMUT136271.1	97.37	38	1	0	1039	1076	1526	1563	7e-10	67.9
XLOC_000251	NONMMUT074763.2	92.31	52	3	1	955	1006	1770	1720	2e-08	63.9
XLOC_000254	NONMMUT070345.2	96.43	28	1	0	555	582	52	79	0.0004	48.1
XLOC_000254	NONMMUT070345.2	96.43	28	1	0	532	559	52	79	0.0004	48.1
XLOC_000254	NONMMUT070345.2	96.43	28	1	0	492	519	52	79	0.0004	48.1
XLOC_000254	NONMMUT098512.1	95.12	41	1	1	775	815	4124	4163	5e-07	58
XLOC_000257	NONMMUT004140.2	90.91	44	4	0	149	192	1977	1934	5e-07	56
XLOC_000259	NONMMUT033956.2	96.3	27	1	0	170	196	1155	1129	0.0008	46.1
XLOC_000265	NONMMUT135361.1	95.24	63	2	1	74	136	10	71	1e-17	93.7
XLOC_000269	NONMMUT122916.1	95	40	2	0	2510	2549	2871	2910	3e-08	63.9
XLOC_000269	NONMMUT122916.1	95	40	2	0	2448	2487	2871	2910	3e-08	63.9
XLOC_000269	NONMMUT122916.1	95	40	2	0	2445	2484	2871	2910	3e-08	63.9
XLOC_000269	NONMMUT122916.1	95	40	2	0	2607	2646	2871	2910	3e-08	63.9
XLOC_000276	NONMMUT077094.1	88.73	71	8	0	137	207	928	998	5e-13	77.8
XLOC_000288	NONMMUT077177.1	88.89	45	5	0	5	49	1362	1406	5e-05	50.1
XLOC_000289	NONMMUT070345.2	94.59	37	2	0	980	1016	21	57	7e-07	58
XLOC_000295	NONMMUT004502.2	96.67	60	2	0	8336	8395	536	595	9e-20	103
XLOC_000295	NONMMUT077187.1	85.06	154	20	2	820	973	1834	1984	3e-22	109
XLOC_000295	NONMMUT077187.1	85.06	154	20	2	753	906	1834	1984	2e-21	109
XLOC_000295	NONMMUT004497.2	93.81	113	7	0	570	682	27	139	6e-40	168
XLOC_000295	NONMMUT004497.2	93.81	113	7	0	544	656	27	139	3e-40	168
XLOC_000295	NONMMUT077187.1	85.06	154	20	2	1534	1687	1834	1984	2e-21	109
XLOC_000298	NONMMUT034784.2	96.43	28	1	0	155	182	1248	1221	0.0002	48.1
XLOC_000299	NONMMUT002596.2	93.39	121	8	0	66	186	83	203	5e-43	176
XLOC_000303	NONMMUT122916.1	95	40	2	0	2045	2084	2871	2910	3e-08	63.9
XLOC_000304	NONMMUT121578.1	94.87	39	2	0	1241	1279	698	660	5e-08	61.9
XLOC_000312	NONMMUT136296.1	92.16	51	3	1	44	94	1181	1230	2e-08	61.9
XLOC_000320	NONMMUT121578.1	91.11	45	4	0	25	69	660	704	3e-07	58
XLOC_000322	NONMMUT096553.1	92.5	40	2	1	614	653	399	361	0.0004	48.1
XLOC_000322	NONMMUT014505.2	88.24	68	7	1	736	803	6	72	1e-08	63.9
XLOC_000322	NONMMUT014505.2	88.24	68	7	1	611	678	6	72	1e-08	63.9
XLOC_000323	NONMMUT133052.1	91.84	49	4	0	778	826	99	51	4e-09	65.9
XLOC_000332	NONMMUT076567.1	84.85	297	25	4	383	678	1	278	2e-59	232
XLOC_000338	NONMMUT109564.1	86.96	69	8	1	310	378	324	391	2e-07	58
XLOC_000341	NONMMUT076603.1	96.83	63	2	0	8	70	23	85	1e-22	109
XLOC_000342	NONMMUT012722.2	85.88	85	12	0	390	474	1509	1593	3e-11	73.8
XLOC_000342	NONMMUT012722.2	85.88	85	12	0	390	474	1509	1593	3e-11	73.8
XLOC_000342	NONMMUT012722.2	85.54	83	12	0	569	651	1511	1593	3e-10	69.9
XLOC_000342	NONMMUT008164.2	100	28	0	0	882	909	2175	2148	2e-06	56
XLOC_000342	NONMMUT012722.2	85.54	83	12	0	503	585	1511	1593	5e-10	69.9
XLOC_000342	NONMMUT012722.2	85.54	83	12	0	542	624	1511	1593	3e-10	69.9
XLOC_000342	NONMMUT008164.2	100	28	0	0	1267	1294	2175	2148	3e-06	56
XLOC_000342	NONMMUT012722.2	85.54	83	12	0	499	581	1511	1593	5e-10	69.9
XLOC_000342	NONMMUT012722.2	86.05	86	12	0	435	520	1508	1593	5e-12	75.8
XLOC_000342	NONMMUT105294.1	100	24	0	0	350	373	2635	2658	0.0003	48.1
XLOC_000342	NONMMUT129066.1	94	50	2	1	1874	1923	136	88	1e-09	67.9
XLOC_000342	NONMMUT008164.2	100	28	0	0	609	636	2175	2148	1e-06	56
XLOC_000342	NONMMUT012722.2	85.54	83	12	0	213	295	1511	1593	5e-10	69.9
XLOC_000342	NONMMUT012722.2	85.54	83	12	0	210	292	1511	1593	5e-10	69.9
XLOC_000342	NONMMUT012722.2	85.54	83	12	0	524	606	1511	1593	3e-10	69.9
XLOC_000343	NONMMUT076626.1	81.89	127	22	1	5	130	253	379	7e-08	61.9
XLOC_000343	NONMMUT076626.1	81.89	127	22	1	5	130	253	379	4e-08	61.9
XLOC_000346	NONMMUT003637.2	92.21	629	35	7	1251	1873	306	926	0	644
XLOC_000350	NONMMUT037746.2	80.97	331	50	5	172	498	141	462	6e-30	133
XLOC_000350	NONMMUT037746.2	80.97	331	50	5	280	606	141	462	7e-30	133
XLOC_000362	NONMMUT111185.1	93.75	32	2	0	243	274	601	570	0.0002	48.1
XLOC_000366	NONMMUT060948.2	93.94	33	2	0	469	501	2178	2210	7e-05	50.1
XLOC_000367	NONMMUT063034.2	95.24	42	2	0	635	676	2212	2171	4e-10	67.9
XLOC_000367	NONMMUT063034.2	95.24	42	2	0	861	902	2212	2171	6e-10	67.9
XLOC_000367	NONMMUT063034.2	95.24	42	2	0	850	891	2212	2171	6e-10	67.9
XLOC_000367	NONMMUT063034.2	95.24	42	2	0	516	557	2212	2171	4e-10	67.9
XLOC_000367	NONMMUT063034.2	95.24	42	2	0	523	564	2212	2171	4e-10	67.9
XLOC_000367	NONMMUT063034.2	95.24	42	2	0	538	579	2212	2171	4e-10	67.9
XLOC_000369	NONMMUT003964.2	85.76	660	49	15	1	639	815	1450	2e-140	504
XLOC_000369	NONMMUT003964.2	85.15	633	49	15	1	612	842	1450	3e-124	450
XLOC_000371	NONMMUT096553.1	94.74	38	2	0	698	735	408	371	1e-07	60
XLOC_000371	NONMMUT096553.1	94.74	38	2	0	702	739	408	371	1e-07	60
XLOC_000372	NONMMUT076816.1	92.16	102	7	1	793	894	101	1	5e-29	131
XLOC_000372	NONMMUT076816.1	92.16	102	7	1	1211	1312	101	1	7e-29	131
XLOC_000372	NONMMUT076824.1	100	27	0	0	105	131	940	914	7e-06	54
XLOC_000372	NONMMUT076816.1	92.16	102	7	1	989	1090	101	1	6e-29	131
XLOC_000372	NONMMUT076824.1	100	27	0	0	81	107	940	914	1e-05	54
XLOC_000372	NONMMUT076824.1	100	27	0	0	50	76	940	914	4e-06	54
XLOC_000372	NONMMUT076816.1	92.16	102	7	1	574	675	101	1	4e-29	131
XLOC_000372	NONMMUT076816.1	92.16	102	7	1	726	827	101	1	4e-29	131
XLOC_000372	NONMMUT076816.1	92.16	102	7	1	420	521	101	1	3e-29	131
XLOC_000379	NONMMUT040707.2	94.12	34	2	0	154	187	1438	1405	2e-05	52
XLOC_000385	NONMMUT073444.2	83.87	93	15	0	401	493	512	604	4e-09	65.9
XLOC_000391	NONMMUT137054.1	100	24	0	0	297	320	661	684	0.0003	48.1
XLOC_000391	NONMMUT008099.2	100	28	0	0	307	334	2095	2068	8e-07	56
XLOC_000391	NONMMUT008099.2	100	28	0	0	256	283	2095	2068	7e-07	56
XLOC_000402	NONMMUT118236.1	90.91	44	4	0	516	559	301	258	3e-06	56
XLOC_000402	NONMMUT118236.1	90.91	44	4	0	516	559	301	258	4e-06	56
XLOC_000402	NONMMUT118236.1	90.91	44	4	0	369	412	301	258	4e-06	56
XLOC_000403	NONMMUT081531.1	93.18	44	2	1	28	71	228	186	1e-06	56
XLOC_000404	NONMMUT032208.2	97.5	40	0	1	1391	1430	1971	1933	4e-08	63.9
XLOC_000407	NONMMUT008099.2	100	28	0	0	21	48	2068	2095	5e-06	56
XLOC_000407	NONMMUT008099.2	100	28	0	0	21	48	2068	2095	5e-06	56
XLOC_000410	NONMMUT070345.2	94.59	37	2	0	72	108	21	57	2e-07	58
XLOC_000410	NONMMUT076433.1	94.12	34	2	0	580	613	540	507	0.0001	52
XLOC_000410	NONMMUT076433.1	94.12	34	2	0	580	613	540	507	0.0001	52
XLOC_000411	NONMMUT119579.1	94.74	38	2	0	661	698	34	71	1e-07	60
XLOC_000412	NONMMUT071907.2	90.48	42	4	0	710	751	355	314	4e-05	52
XLOC_000413	NONMMUT070345.2	92.98	57	4	0	3029	3085	57	1	2e-13	81.8
XLOC_000413	NONMMUT070345.2	92.98	57	4	0	3029	3085	57	1	2e-13	81.8
XLOC_000413	NONMMUT070345.2	92.98	57	4	0	3029	3085	57	1	2e-13	81.8
XLOC_000413	NONMMUT070345.2	92.98	57	4	0	3029	3085	57	1	2e-13	81.8
XLOC_000414	NONMMUT032420.2	93.33	45	3	0	982	1026	64	20	5e-09	65.9
XLOC_000414	NONMMUT032420.2	93.33	45	3	0	228	272	64	20	3e-09	65.9
XLOC_000418	NONMMUT055240.2	96.67	30	1	0	331	360	1421	1450	4e-05	52
XLOC_000418	NONMMUT055240.2	96.67	30	1	0	331	360	1421	1450	5e-05	52
XLOC_000418	NONMMUT055240.2	96.67	30	1	0	331	360	1421	1450	6e-05	52
XLOC_000418	NONMMUT055240.2	96.67	30	1	0	331	360	1421	1450	4e-05	52
XLOC_000418	NONMMUT057333.2	90.7	43	4	0	826	868	68	26	9e-06	54
XLOC_000419	NONMMUT070345.2	93.62	47	3	0	390	436	10	56	9e-11	69.9
XLOC_000420	NONMMUT040289.2	100	31	0	0	570	600	1216	1186	7e-08	61.9
XLOC_000421	NONMMUT070345.2	91.23	57	5	0	3011	3067	57	1	4e-11	73.8
XLOC_000421	NONMMUT070345.2	91.23	57	5	0	3011	3067	57	1	4e-11	73.8
XLOC_000421	NONMMUT070345.2	91.23	57	5	0	3011	3067	57	1	4e-11	73.8
XLOC_000421	NONMMUT070345.2	91.23	57	5	0	3011	3067	57	1	4e-11	73.8
XLOC_000421	NONMMUT070345.2	91.23	57	5	0	3011	3067	57	1	4e-11	73.8
XLOC_000422	NONMMUT050986.2	91.92	99	8	0	745	843	118	216	1e-29	133
XLOC_000422	NONMMUT050986.2	91.92	99	8	0	745	843	118	216	1e-29	133
XLOC_000422	NONMMUT050986.2	91.92	99	8	0	745	843	118	216	1e-29	133
XLOC_000422	NONMMUT050986.2	91.92	99	8	0	745	843	118	216	1e-29	133
XLOC_000424	NONMMUT014806.2	89.39	66	6	1	459	524	1333	1269	1e-09	67.9
XLOC_000425	NONMMUT050957.2	100	38	0	0	29	66	905	868	5e-13	75.8
XLOC_000433	NONMMUT073099.2	90.24	41	4	0	1644	1684	42	2	0.0003	50.1
XLOC_000433	NONMMUT073099.2	90.24	41	4	0	1311	1351	42	2	0.0003	50.1
XLOC_000433	NONMMUT073099.2	90.24	41	4	0	1296	1336	42	2	0.0003	50.1
XLOC_000433	NONMMUT073099.2	90.24	41	4	0	997	1037	42	2	0.0002	50.1
XLOC_000433	NONMMUT073099.2	90.24	41	4	0	1319	1359	42	2	0.0004	50.1
XLOC_000437	NONMMUT031934.2	80.6	134	25	1	707	839	2352	2485	5e-05	52
XLOC_000447	NONMMUT103030.1	100	30	0	0	712	741	1559	1588	1e-07	60
XLOC_000448	NONMMUT117714.1	87.36	87	9	2	334	420	2	86	6e-11	69.9
XLOC_000450	NONMMUT070345.2	89.66	58	6	0	474	531	67	10	3e-10	67.9
XLOC_000450	NONMMUT070345.2	89.66	58	6	0	1053	1110	67	10	7e-10	67.9
XLOC_000452	NONMMUT093047.1	95	40	1	1	482	521	1460	1422	1e-06	56
XLOC_000453	NONMMUT115889.1	90.82	98	7	1	410	507	1256	1161	6e-25	117
XLOC_000453	NONMMUT115889.1	90.82	98	7	1	562	659	1256	1161	6e-25	117
XLOC_000458	NONMMUT070345.2	89.58	48	5	0	60	107	10	57	9e-07	56
XLOC_000465	NONMMUT093149.1	94.44	36	2	0	86	121	1045	1080	1e-06	56
XLOC_000467	NONMMUT015482.2	100	25	0	0	1895	1919	2199	2175	0.0003	50.1
XLOC_000467	NONMMUT075505.1	97.06	34	1	0	3315	3348	670	637	5e-07	60
XLOC_000467	NONMMUT085049.1	92.11	38	3	0	231	268	620	583	2e-05	52
XLOC_000467	NONMMUT085049.1	92.11	38	3	0	231	268	620	583	4e-05	52
XLOC_000467	NONMMUT085049.1	92.11	38	3	0	231	268	620	583	4e-05	52
XLOC_000471	NONMMUT050200.2	93.09	188	11	2	420	606	428	242	6e-66	254
XLOC_000471	NONMMUT050200.2	93.09	188	11	2	420	606	428	242	1e-65	254
XLOC_000471	NONMMUT050200.2	93.09	188	11	2	420	606	428	242	2e-65	254
XLOC_000473	NONMMUT075971.1	100	25	0	0	2522	2546	669	693	0.0005	50.1
XLOC_000475	NONMMUT115781.1	86.81	91	10	1	287	377	1484	1396	2e-13	79.8
XLOC_000477	NONMMUT132715.1	92.16	51	3	1	291	341	1314	1363	8e-08	61.9
XLOC_000477	NONMMUT132715.1	92.16	51	3	1	291	341	1314	1363	9e-08	61.9
XLOC_000477	NONMMUT132715.1	92.16	51	3	1	291	341	1314	1363	1e-07	61.9
XLOC_000479	NONMMUT073008.2	88.1	84	10	0	128	211	248	165	5e-16	87.7
XLOC_000479	NONMMUT073008.2	88.1	84	10	0	128	211	248	165	5e-16	87.7
XLOC_000479	NONMMUT073008.2	89.33	75	8	0	128	202	248	174	2e-15	85.7
XLOC_000483	NONMMUT122916.1	96.88	32	1	0	615	646	2902	2871	4e-06	56
XLOC_000483	NONMMUT122916.1	96.88	32	1	0	615	646	2902	2871	4e-06	56
XLOC_000483	NONMMUT122916.1	96.88	32	1	0	615	646	2902	2871	4e-06	56
XLOC_000483	NONMMUT002115.2	90.32	62	5	1	366	427	1858	1798	8e-10	67.9
XLOC_000487	NONMMUT121578.1	97.37	38	1	0	128	165	672	709	8e-10	67.9
XLOC_000489	NONMMUT096229.1	100	26	0	0	20	45	297	322	3e-05	52
XLOC_000489	NONMMUT002115.2	88.68	53	6	0	154	206	1836	1784	1e-06	58
XLOC_000490	NONMMUT070345.2	91.38	58	4	1	1131	1187	67	10	1e-09	67.9
XLOC_000491	NONMMUT070345.2	91.04	67	6	0	419	485	67	1	3e-15	85.7
XLOC_000492	NONMMUT049901.2	87.79	131	15	1	1239	1369	1975	1846	4e-27	125
XLOC_000492	NONMMUT049901.2	87.79	131	15	1	1225	1355	1975	1846	4e-27	125
XLOC_000492	NONMMUT049901.2	87.5	96	11	1	1179	1273	1580	1485	8e-16	87.7
XLOC_000492	NONMMUT049901.2	87.79	131	15	1	1120	1250	1975	1846	6e-27	125
XLOC_000492	NONMMUT049901.2	91.6	119	9	1	816	934	2250	2133	4e-34	149
XLOC_000506	NONMMUT122916.1	97.37	38	1	0	421	458	2908	2871	4e-10	67.9
XLOC_000507	NONMMUT096026.1	96.43	28	1	0	130	157	325	352	0.0004	48.1
XLOC_000508	NONMMUT087075.1	100	24	0	0	265	288	68	45	0.0003	48.1
XLOC_000512	NONMMUT041507.2	86.57	67	9	0	186	252	2	68	2e-08	61.9
XLOC_000512	NONMMUT041507.2	86.57	67	9	0	186	252	2	68	3e-08	61.9
XLOC_000512	NONMMUT041507.2	86.57	67	9	0	186	252	2	68	4e-08	61.9
XLOC_000512	NONMMUT041507.2	86.57	67	9	0	186	252	2	68	4e-08	61.9
XLOC_000513	NONMMUT115937.1	96.3	27	1	0	163	189	3111	3085	0.0005	46.1
XLOC_000516	NONMMUT067703.2	91.07	56	4	1	3185	3240	1528	1582	3e-08	63.9
XLOC_000516	NONMMUT067703.2	91.07	56	4	1	3223	3278	1528	1582	3e-08	63.9
XLOC_000516	NONMMUT067703.2	91.07	56	4	1	2916	2971	1528	1582	3e-08	63.9
XLOC_000517	NONMMUT117230.1	87.27	55	7	0	1	55	2128	2182	3e-06	54
XLOC_000518	NONMMUT122916.1	87.3	63	8	0	1634	1696	2908	2846	9e-08	61.9
XLOC_000518	NONMMUT136448.1	91.67	36	3	0	299	334	1897	1932	0.0003	48.1
XLOC_000518	NONMMUT136448.1	91.67	36	3	0	299	334	1897	1932	0.0003	48.1
XLOC_000521	NONMMUT049228.2	91.07	168	13	2	48	213	2525	2358	4e-49	198
XLOC_000523	NONMMUT010039.2	95.35	43	2	0	4711	4753	1640	1682	7e-10	69.9
XLOC_000523	NONMMUT022385.2	100	28	0	0	1147	1174	2265	2238	9e-06	56
XLOC_000523	NONMMUT022385.2	100	28	0	0	1147	1174	2265	2238	9e-06	56
XLOC_000523	NONMMUT022385.2	100	28	0	0	1147	1174	2265	2238	9e-06	56
XLOC_000523	NONMMUT022385.2	100	28	0	0	1147	1174	2265	2238	9e-06	56
XLOC_000529	NONMMUT131181.1	94.12	34	2	0	98	131	4912	4945	3e-05	52
XLOC_000529	NONMMUT131181.1	94.12	34	2	0	98	131	4912	4945	5e-05	52
XLOC_000534	NONMMUT032692.2	90.7	43	4	0	14	56	299	341	1e-05	54
XLOC_000547	NONMMUT115385.1	85.86	99	12	1	1025	1121	190	92	2e-13	79.8
XLOC_000547	NONMMUT115385.1	85.42	192	24	3	1025	1214	190	1	1e-30	137
XLOC_000547	NONMMUT115385.1	85.42	192	24	3	1025	1214	190	1	2e-30	137
XLOC_000547	NONMMUT096553.1	88.33	60	6	1	19	78	350	408	3e-06	56
XLOC_000547	NONMMUT096553.1	88.33	60	6	1	19	78	350	408	1e-06	56
XLOC_000560	NONMMUT048223.2	90	70	7	0	16	85	739	670	2e-15	83.8
XLOC_000564	NONMMUT136448.1	94.44	36	2	0	859	894	1932	1897	6e-06	56
XLOC_000565	NONMMUT117056.1	96.72	122	4	0	120	241	134	13	1e-53	210
XLOC_000565	NONMMUT055409.2	94.55	55	3	0	1	55	13	67	5e-15	85.7
XLOC_000565	NONMMUT117056.1	95.45	132	6	0	1842	1973	132	1	8e-54	214
XLOC_000568	NONMMUT132737.1	97.14	35	1	0	75	109	467	501	3e-08	61.9
XLOC_000578	NONMMUT134386.1	88.52	61	6	1	873	933	1652	1593	1e-06	58
XLOC_000578	NONMMUT134386.1	88.52	61	6	1	873	933	1652	1593	1e-06	58
XLOC_000580	NONMMUT056729.2	91.89	37	3	0	96	132	1602	1638	3e-05	50.1
XLOC_000582	NONMMUT121507.1	100	23	0	0	4	26	661	683	0.0004	46.1
XLOC_000583	NONMMUT080322.1	87.3	63	7	1	41	103	1130	1069	4e-06	54
XLOC_000584	NONMMUT112355.1	88.33	60	5	1	681	738	101	42	4e-07	58
XLOC_000584	NONMMUT112355.1	88.33	60	5	1	705	762	101	42	4e-07	58
XLOC_000587	NONMMUT038529.2	92.5	40	2	1	741	780	1096	1058	0.0007	48.1
XLOC_000587	NONMMUT038529.2	92.5	40	2	1	741	780	1096	1058	0.0007	48.1
XLOC_000587	NONMMUT038529.2	92.5	40	2	1	741	780	1096	1058	0.0008	48.1
XLOC_000587	NONMMUT038529.2	92.5	40	2	1	741	780	1096	1058	0.0008	48.1
XLOC_000587	NONMMUT038529.2	92.5	40	2	1	741	780	1096	1058	0.0009	48.1
XLOC_000588	NONMMUT065286.2	92.5	40	3	0	1004	1043	725	686	7e-06	56
XLOC_000588	NONMMUT119509.1	92.86	42	3	0	3264	3305	498	539	5e-07	60
XLOC_000590	NONMMUT114312.1	88.46	78	9	0	335	412	596	673	7e-15	83.8
XLOC_000590	NONMMUT114312.1	88.46	78	9	0	335	412	596	673	8e-15	83.8
XLOC_000590	NONMMUT114312.1	88.46	78	9	0	335	412	596	673	8e-15	83.8
XLOC_000592	NONMMUT032692.2	93.1	58	4	0	53	110	67	10	1e-14	83.8
XLOC_000596	NONMMUT120957.1	96.67	30	1	0	179	208	1646	1617	2e-05	52
XLOC_000596	NONMMUT120957.1	96.67	30	1	0	179	208	1646	1617	2e-05	52
XLOC_000597	NONMMUT126111.1	93.94	33	2	0	416	448	615	583	7e-05	50.1
XLOC_000598	NONMMUT102103.1	88.89	63	6	1	680	742	748	687	5e-08	61.9
XLOC_000598	NONMMUT053545.2	92.76	221	15	1	93	312	623	403	2e-81	303
XLOC_000598	NONMMUT053545.2	92.76	221	15	1	682	901	623	403	5e-81	303
XLOC_000598	NONMMUT053545.2	92.76	221	15	1	3394	3613	623	403	2e-80	303
XLOC_000598	NONMMUT053545.2	92.79	222	15	1	3394	3614	623	402	5e-81	305
XLOC_000598	NONMMUT053545.2	92.79	222	15	1	3394	3614	623	402	5e-81	305
XLOC_000598	NONMMUT053545.2	92.76	221	15	1	3394	3613	623	403	2e-80	303
XLOC_000600	NONMMUT021972.2	86.27	284	39	0	1	284	284	1	2e-66	254
XLOC_000601	NONMMUT049804.2	94.59	37	2	0	419	455	1036	1000	3e-06	58
XLOC_000603	NONMMUT052494.2	94.29	35	2	0	770	804	651	617	8e-06	54
XLOC_000603	NONMMUT052494.2	94.29	35	2	0	978	1012	651	617	1e-05	54
XLOC_000603	NONMMUT052494.2	94.29	35	2	0	770	804	651	617	9e-06	54
XLOC_000603	NONMMUT052494.2	94.29	35	2	0	978	1012	651	617	1e-05	54
XLOC_000603	NONMMUT052494.2	94.29	35	2	0	767	801	651	617	1e-05	54
XLOC_000603	NONMMUT052494.2	94.29	35	2	0	229	263	651	617	7e-06	54
XLOC_000603	NONMMUT102064.1	90.16	61	5	1	21	81	687	746	1e-09	65.9
XLOC_000609	NONMMUT112022.1	85.59	111	14	1	3693	3801	2219	2109	2e-15	87.7
XLOC_000609	NONMMUT008416.2	94.44	36	2	0	602	637	2957	2992	9e-06	56
XLOC_000610	NONMMUT044947.2	86.94	490	55	5	35	520	485	1	5e-120	432
XLOC_000613	NONMMUT122641.1	100	24	0	0	240	263	2110	2087	0.0004	48.1
XLOC_000624	NONMMUT055409.2	96.43	28	1	0	667	694	55	28	0.0004	48.1
XLOC_000624	NONMMUT055409.2	94.29	35	2	0	755	789	55	21	9e-06	54
XLOC_000624	NONMMUT055409.2	94.29	35	2	0	353	387	55	21	4e-06	54
XLOC_000626	NONMMUT092856.1	96.97	33	1	0	607	639	3835	3867	4e-07	58
XLOC_000627	NONMMUT092856.1	90.32	62	6	0	3	64	3779	3840	5e-13	75.8
XLOC_000628	NONMMUT122823.1	85.71	56	8	0	16	71	774	719	0.0006	48.1
XLOC_000628	NONMMUT122823.1	85.71	56	8	0	16	71	774	719	0.0005	48.1
XLOC_000628	NONMMUT122823.1	85.71	56	8	0	16	71	774	719	0.0004	48.1
XLOC_000631	NONMMUT111908.1	92.31	39	3	0	320	358	242	204	4e-06	54
XLOC_000631	NONMMUT111908.1	93.94	33	2	0	879	911	242	210	0.0001	50.1
XLOC_000632	NONMMUT044694.2	87.09	333	35	1	4900	5224	1184	852	1e-76	291
XLOC_000634	NONMMUT032692.2	97.22	36	1	0	248	283	45	10	6e-09	63.9
XLOC_000636	NONMMUT070345.2	88.46	52	6	0	713	764	67	16	2e-06	56
XLOC_000636	NONMMUT070345.2	88.46	52	6	0	963	1014	67	16	2e-06	56
XLOC_000636	NONMMUT070345.2	88.46	52	6	0	696	747	67	16	2e-06	56
XLOC_000636	NONMMUT070345.2	88.46	52	6	0	712	763	67	16	2e-06	56
XLOC_000636	NONMMUT070345.2	88.46	52	6	0	1097	1148	67	16	3e-06	56
XLOC_000646	NONMMUT098512.1	95.35	43	1	1	5	47	4164	4123	2e-08	61.9
XLOC_000651	NONMMUT070345.2	100	32	0	0	307	338	50	19	3e-09	63.9
XLOC_000656	NONMMUT098512.1	92.31	52	3	1	5	56	4164	4114	2e-08	63.9
XLOC_000658	NONMMUT055409.2	91.04	67	6	0	386	452	67	1	4e-15	85.7
XLOC_000663	NONMMUT032493.2	100	25	0	0	4	28	1816	1840	4e-05	50.1
XLOC_000667	NONMMUT016749.2	93.94	33	2	0	77	109	632	664	7e-05	50.1
XLOC_000672	NONMMUT092738.1	93.55	31	2	0	20	50	812	842	0.0006	46.1
XLOC_000674	NONMMUT042155.2	94.12	34	2	0	524	557	1591	1624	2e-05	52
XLOC_000676	NONMMUT089171.1	97.22	36	1	0	589	624	97	62	3e-08	63.9
XLOC_000676	NONMMUT089171.1	97.22	36	1	0	589	624	97	62	3e-08	63.9
XLOC_000676	NONMMUT032692.2	97.3	37	1	0	2282	2318	47	11	1e-08	65.9
XLOC_000679	NONMMUT070345.2	89.55	67	7	0	792	858	67	1	1e-12	77.8
XLOC_000680	NONMMUT070345.2	91.23	57	5	0	498	554	79	23	1e-11	73.8
XLOC_000680	NONMMUT070345.2	91.23	57	5	0	498	554	79	23	2e-11	73.8
XLOC_000680	NONMMUT070345.2	91.23	57	5	0	498	554	79	23	2e-11	73.8
XLOC_000689	NONMMUT070345.2	88.06	67	8	0	68	134	67	1	1e-10	69.9
XLOC_000690	NONMMUT110714.1	100	25	0	0	209	233	1350	1374	0.0004	50.1
XLOC_000697	NONMMUT040289.2	97.62	42	1	0	659	700	1186	1227	4e-12	75.8
XLOC_000697	NONMMUT040289.2	97.62	42	1	0	659	700	1186	1227	4e-12	75.8
XLOC_000699	NONMMUT122069.1	92.68	41	2	1	145	185	293	332	8e-05	50.1
XLOC_000699	NONMMUT122069.1	92.68	41	2	1	145	185	293	332	8e-05	50.1
XLOC_000699	NONMMUT122069.1	92.68	41	2	1	145	185	293	332	0.0001	50.1
XLOC_000702	NONMMUT073099.2	93.48	46	3	0	291	336	46	1	9e-10	67.9
XLOC_000709	NONMMUT002711.2	85.71	133	19	0	474	606	1503	1371	7e-24	113
XLOC_000709	NONMMUT002711.2	85.71	133	19	0	256	388	1503	1371	1e-23	113
XLOC_000709	NONMMUT002711.2	85.71	133	19	0	256	388	1503	1371	1e-23	113
XLOC_000709	NONMMUT002711.2	85.71	133	19	0	256	388	1503	1371	2e-23	113
XLOC_000709	NONMMUT002711.2	85.71	133	19	0	256	388	1503	1371	2e-23	113
XLOC_000709	NONMMUT002711.2	92.98	57	4	0	352	408	1118	1062	9e-14	81.8
XLOC_000709	NONMMUT002714.2	87.22	180	21	1	3014	3193	760	583	7e-40	168
XLOC_000709	NONMMUT002711.2	85.71	133	19	0	256	388	1503	1371	5e-23	113
XLOC_000709	NONMMUT002714.2	86.71	173	21	1	2385	2557	753	583	1e-35	155
XLOC_000709	NONMMUT002714.2	86.71	173	21	1	2201	2373	753	583	1e-35	155
XLOC_000709	NONMMUT002714.2	86.71	173	21	1	1725	1897	753	583	1e-35	155
XLOC_000709	NONMMUT002714.2	86.71	173	21	1	1549	1721	753	583	1e-35	155
XLOC_000709	NONMMUT002714.2	87.22	180	21	1	2733	2912	760	583	9e-40	168
XLOC_000709	NONMMUT002714.2	86.71	173	21	1	1656	1828	753	583	1e-35	155
XLOC_000710	NONMMUT034977.2	96.67	30	1	0	744	773	1026	997	3e-05	52
XLOC_000711	NONMMUT055409.2	97.06	34	1	0	285	318	250	283	1e-07	60
XLOC_000711	NONMMUT055409.2	97.06	34	1	0	285	318	250	283	1e-07	60
XLOC_000712	NONMMUT002716.2	93.65	63	3	1	461	522	94	32	2e-15	85.7
XLOC_000716	NONMMUT015947.2	92.45	53	3	1	399	451	277	226	3e-09	65.9
XLOC_000716	NONMMUT015947.2	92.45	53	3	1	399	451	277	226	3e-09	65.9
XLOC_000717	NONMMUT078887.1	88.64	44	5	0	552	595	400	357	0.0006	48.1
XLOC_000717	NONMMUT078887.1	88.64	44	5	0	552	595	400	357	0.0005	48.1
XLOC_000719	NONMMUT078897.1	88.12	101	12	0	1	101	1293	1193	1e-21	105
XLOC_000722	NONMMUT121056.1	91.38	58	5	0	1077	1134	1078	1135	1e-11	75.8
XLOC_000725	NONMMUT112680.1	87.93	58	7	0	92	149	11219	11276	5e-08	60
XLOC_000727	NONMMUT104744.1	97.3	37	1	0	148	184	87	51	1e-09	65.9
XLOC_000729	NONMMUT078918.1	83.19	232	33	2	199	430	227	2	1e-32	143
XLOC_000734	NONMMUT076519.1	83.22	143	22	2	153	294	686	827	3e-13	77.8
XLOC_000735	NONMMUT003061.2	93.75	32	2	0	1262	1293	172	141	0.0007	48.1
XLOC_000735	NONMMUT003061.2	93.75	32	2	0	1401	1432	172	141	0.0008	48.1
XLOC_000735	NONMMUT003061.2	93.75	32	2	0	1221	1252	172	141	0.0007	48.1
XLOC_000744	NONMMUT066385.2	84.62	65	10	0	1	65	845	781	7e-05	50.1
XLOC_000744	NONMMUT066385.2	84.62	65	10	0	1	65	845	781	7e-05	50.1
XLOC_000746	NONMMUT127779.1	100	25	0	0	720	744	1593	1617	0.0001	50.1
XLOC_000749	NONMMUT126489.1	90	60	5	1	493	552	1820	1762	5e-09	63.9
XLOC_000755	NONMMUT003677.2	87.39	222	26	2	337	557	1003	783	6e-50	202
XLOC_000755	NONMMUT003677.2	87.39	222	26	2	337	557	1003	783	6e-50	202
XLOC_000759	NONMMUT003654.2	87.67	73	9	0	1295	1367	366	294	4e-11	73.8
XLOC_000766	NONMMUT118379.1	100	24	0	0	120	143	550	573	0.0004	48.1
XLOC_000766	NONMMUT118379.1	100	24	0	0	120	143	550	573	0.0004	48.1
XLOC_000768	NONMMUT106309.1	96.67	30	1	0	1310	1339	3884	3913	5e-05	52
XLOC_000769	NONMMUT076654.1	82.41	108	17	1	432	537	108	1	5e-07	58
XLOC_000769	NONMMUT076654.1	82.41	108	17	1	219	324	108	1	2e-07	58
XLOC_000769	NONMMUT076654.1	82.41	108	17	1	381	486	108	1	3e-07	58
XLOC_000773	NONMMUT014350.2	100	23	0	0	135	157	2111	2089	0.0008	46.1
XLOC_000777	NONMMUT129192.1	94.44	36	2	0	2056	2091	863	828	5e-06	56
XLOC_000780	NONMMUT076635.1	84.32	185	26	1	1	185	616	435	2e-30	133
XLOC_000787	NONMMUT003999.2	83.58	134	22	0	230	363	134	1	2e-17	91.7
XLOC_000794	NONMMUT112514.1	90.57	53	4	1	23	75	3693	3642	2e-07	58
XLOC_000796	NONMMUT095408.1	95	40	2	0	289	328	1728	1767	5e-09	63.9
XLOC_000796	NONMMUT095408.1	95	40	2	0	289	328	1728	1767	5e-09	63.9
XLOC_000797	NONMMUT087460.1	94.64	56	2	1	3033	3088	141	195	8e-13	79.8
XLOC_000797	NONMMUT087460.1	94.64	56	2	1	3033	3088	141	195	1e-12	79.8
XLOC_000801	NONMMUT016344.2	91.11	90	8	0	669	758	325	236	3e-24	115
XLOC_000801	NONMMUT016344.2	91.11	90	8	0	606	695	325	236	3e-24	115
XLOC_000801	NONMMUT016344.2	91.11	90	8	0	529	618	325	236	3e-24	115
XLOC_000802	NONMMUT122916.1	92.11	38	3	0	192	229	2908	2871	3e-05	52
XLOC_000804	NONMMUT126085.1	100	26	0	0	1305	1330	642	667	0.0001	52
XLOC_000805	NONMMUT040001.2	94.64	56	2	1	1930	1985	1990	2044	3e-13	79.8
XLOC_000806	NONMMUT111331.1	88.89	54	5	1	301	353	1596	1543	5e-05	52
XLOC_000806	NONMMUT111331.1	88.89	54	5	1	301	353	1596	1543	5e-05	52
XLOC_000806	NONMMUT111331.1	88.89	54	5	1	301	353	1596	1543	5e-05	52
XLOC_000806	NONMMUT111331.1	88.89	54	5	1	301	353	1596	1543	6e-05	52
XLOC_000807	NONMMUT104744.1	97.3	37	1	0	1776	1812	51	87	1e-08	65.9
XLOC_000808	NONMMUT124020.1	92.59	54	4	0	1950	2003	3286	3339	1e-11	75.8
XLOC_000810	NONMMUT129768.1	98.15	54	1	0	733	786	438	385	1e-19	99.6
XLOC_000813	NONMMUT032692.2	96.88	32	1	0	206	237	49	18	6e-07	56
XLOC_000818	NONMMUT070923.2	92.11	38	3	0	311	348	422	385	1e-05	52
XLOC_000822	NONMMUT099401.1	94.29	35	2	0	2452	2486	372	406	3e-05	54
XLOC_000825	NONMMUT117587.1	89.09	55	5	1	1	55	389	442	2e-05	54
XLOC_000826	NONMMUT041885.2	83.33	78	13	0	1718	1795	2242	2319	7e-05	52
XLOC_000830	NONMMUT068241.2	94.59	37	2	0	968	1004	2380	2344	7e-07	58
XLOC_000830	NONMMUT122916.1	94.59	37	2	0	2782	2818	2872	2908	2e-06	58
XLOC_000830	NONMMUT012524.2	100	31	0	0	301	331	1790	1760	1e-07	61.9
XLOC_000830	NONMMUT122916.1	94.59	37	2	0	1761	1797	2872	2908	2e-06	58
XLOC_000830	NONMMUT122916.1	94.59	37	2	0	980	1016	2872	2908	1e-06	58
XLOC_000831	NONMMUT034977.2	95.12	41	2	0	1585	1625	1023	983	4e-09	65.9
XLOC_000835	NONMMUT070345.2	91.67	48	4	0	1543	1590	20	67	2e-08	63.9
XLOC_000837	NONMMUT121578.1	92.31	39	3	0	90	128	699	661	1e-05	54
XLOC_000843	NONMMUT025071.2	88.64	44	5	0	868	911	2537	2580	0.001	48.1
XLOC_000844	NONMMUT041632.2	86.67	75	9	1	48	121	2	76	3e-08	61.9
XLOC_000858	NONMMUT070345.2	95.74	47	2	0	4032	4078	21	67	3e-12	77.8
XLOC_000858	NONMMUT070345.2	95.74	47	2	0	3555	3601	21	67	3e-12	77.8
XLOC_000858	NONMMUT070345.2	95.74	47	2	0	4371	4417	21	67	3e-12	77.8
XLOC_000858	NONMMUT070345.2	88.16	76	9	0	8231	8306	1	76	2e-12	79.8
XLOC_000858	NONMMUT122916.1	92.11	38	3	0	1414	1451	2908	2871	5e-05	52
XLOC_000858	NONMMUT004608.2	97.06	34	1	0	101	134	1636	1603	3e-07	60
XLOC_000859	NONMMUT108329.1	93.18	44	3	0	2682	2725	594	551	8e-08	63.9
XLOC_000868	NONMMUT123719.1	92.73	55	3	1	1479	1533	147	200	2e-10	69.9
XLOC_000870	NONMMUT051713.2	88	50	6	0	6	55	201	250	6e-05	52
XLOC_000879	NONMMUT040754.2	87.29	118	14	1	481	598	1316	1432	9e-22	107
XLOC_000880	NONMMUT040693.2	95.7	93	4	0	1180	1272	893	985	2e-35	153
XLOC_000880	NONMMUT040693.2	95.7	93	4	0	952	1044	893	985	1e-35	153
XLOC_000881	NONMMUT087839.1	92.19	64	4	1	391	454	695	633	2e-13	79.8
XLOC_000886	NONMMUT070345.2	93.1	58	4	0	1237	1294	10	67	2e-14	83.8
XLOC_000886	NONMMUT109982.1	93.06	72	5	0	54	125	60	131	2e-20	103
XLOC_000887	NONMMUT040526.2	95.45	176	3	4	1952	2124	117	290	4e-66	256
XLOC_000889	NONMMUT070345.2	92	50	4	0	987	1036	1	50	1e-09	67.9
XLOC_000890	NONMMUT063034.2	94.12	34	2	0	17	50	2171	2204	3e-05	52
XLOC_000890	NONMMUT063034.2	94.12	34	2	0	3	36	2171	2204	1e-05	52
XLOC_000890	NONMMUT104744.1	89.36	47	5	0	610	656	87	41	2e-05	54
XLOC_000893	NONMMUT070040.2	96.77	31	1	0	873	903	2102	2072	1e-05	54
XLOC_000893	NONMMUT070040.2	96.77	31	1	0	552	582	2102	2072	9e-06	54
XLOC_000893	NONMMUT102029.1	97.3	37	1	0	1538	1574	741	705	9e-09	65.9
XLOC_000893	NONMMUT102029.1	97.3	37	1	0	1773	1809	741	705	1e-08	65.9
XLOC_000893	NONMMUT102029.1	97.3	37	1	0	1694	1730	741	705	1e-08	65.9
XLOC_000893	NONMMUT102029.1	97.3	37	1	0	1689	1725	741	705	1e-08	65.9
XLOC_000893	NONMMUT102029.1	97.3	37	1	0	1381	1417	741	705	9e-09	65.9
XLOC_000893	NONMMUT102029.1	97.3	37	1	0	1648	1684	741	705	1e-08	65.9
XLOC_000893	NONMMUT102029.1	97.3	37	1	0	1550	1586	741	705	9e-09	65.9
XLOC_000893	NONMMUT102029.1	97.3	37	1	0	1632	1668	741	705	1e-08	65.9
XLOC_000893	NONMMUT102029.1	97.3	37	1	0	1622	1658	741	705	1e-08	65.9
XLOC_000893	NONMMUT102029.1	97.3	37	1	0	1527	1563	741	705	9e-09	65.9
XLOC_000893	NONMMUT102029.1	97.3	37	1	0	1531	1567	741	705	9e-09	65.9
XLOC_000893	NONMMUT102029.1	97.3	37	1	0	1161	1197	741	705	9e-09	65.9
XLOC_000893	NONMMUT102029.1	97.3	37	1	0	843	879	741	705	8e-09	65.9
XLOC_000895	NONMMUT115545.1	100	24	0	0	894	917	26	3	0.0006	48.1
XLOC_000895	NONMMUT115545.1	100	24	0	0	689	712	26	3	0.0005	48.1
XLOC_000900	NONMMUT070345.2	90.91	55	5	0	1125	1179	3	57	2e-10	69.9
XLOC_000900	NONMMUT070345.2	90.91	55	5	0	854	908	3	57	2e-10	69.9
XLOC_000904	NONMMUT021915.2	97.37	38	1	0	538	575	1062	1025	1e-09	67.9
XLOC_000907	NONMMUT108005.1	89.74	39	4	0	227	265	204	242	0.0006	46.1
XLOC_000913	NONMMUT040160.2	85.51	214	25	5	29	238	362	573	2e-32	141
XLOC_000916	NONMMUT114086.1	90.36	83	8	0	165	247	86	4	1e-20	101
XLOC_000917	NONMMUT089529.1	96.43	28	1	0	232	259	1083	1056	0.0004	48.1
XLOC_000917	NONMMUT089529.1	96.43	28	1	0	826	853	1083	1056	0.0008	48.1
XLOC_000917	NONMMUT089529.1	96.43	28	1	0	160	187	1083	1056	0.0005	48.1
XLOC_000917	NONMMUT089529.1	96.43	28	1	0	1140	1167	1083	1056	0.0009	48.1
XLOC_000921	NONMMUT032692.2	94.29	35	2	0	517	551	10	44	5e-06	54
XLOC_000922	NONMMUT108088.1	89.43	123	11	1	98	220	3299	3419	4e-30	135
XLOC_000922	NONMMUT108088.1	89.52	124	11	1	548	671	3298	3419	1e-30	137
XLOC_000922	NONMMUT108088.1	89.43	123	11	1	217	339	3299	3419	4e-30	135
XLOC_000922	NONMMUT108088.1	89.52	124	11	1	492	615	3298	3419	1e-30	137
XLOC_000922	NONMMUT108088.1	89.6	125	11	1	533	657	3297	3419	3e-31	139
XLOC_000922	NONMMUT108088.1	89.34	122	11	1	46	167	3300	3419	2e-29	133
XLOC_000926	NONMMUT087068.1	94.59	37	2	0	241	277	477	441	7e-07	58
XLOC_000926	NONMMUT087068.1	94.59	37	2	0	468	504	477	441	4e-07	58
XLOC_000936	NONMMUT008099.2	100	28	0	0	868	895	2095	2068	2e-06	56
XLOC_000936	NONMMUT008099.2	100	28	0	0	898	925	2095	2068	2e-06	56
XLOC_000936	NONMMUT008099.2	100	28	0	0	665	692	2095	2068	2e-06	56
XLOC_000936	NONMMUT109585.1	93.33	60	4	0	1175	1234	387	328	8e-16	87.7
XLOC_000936	NONMMUT008099.2	100	28	0	0	1709	1736	2095	2068	4e-06	56
XLOC_000938	NONMMUT058660.2	90.22	92	9	0	378	469	1603	1694	2e-23	111
XLOC_000939	NONMMUT036864.2	96.55	29	1	0	433	461	3615	3587	7e-05	50.1
XLOC_000939	NONMMUT036864.2	96.55	29	1	0	330	358	3615	3587	6e-05	50.1
XLOC_000941	NONMMUT055409.2	96.55	29	1	0	146	174	251	279	0.0002	50.1
XLOC_000941	NONMMUT055409.2	96.55	29	1	0	16	44	251	279	0.0001	50.1
XLOC_000944	NONMMUT071057.2	92.11	38	3	0	113	150	499	536	3e-05	52
XLOC_000944	NONMMUT071057.2	92.11	38	3	0	209	246	499	536	3e-05	52
XLOC_000945	NONMMUT101341.1	89.83	59	5	1	421	479	743	686	2e-08	61.9
XLOC_000947	NONMMUT131762.1	91.07	56	4	1	948	1003	258	312	1e-08	63.9
XLOC_000949	NONMMUT104539.1	92.68	41	3	0	258	298	228	268	2e-07	58
XLOC_000950	NONMMUT070345.2	91.53	59	5	0	776	834	78	20	8e-13	77.8
XLOC_000950	NONMMUT070345.2	91.53	59	5	0	981	1039	78	20	1e-12	77.8
XLOC_000951	NONMMUT034889.2	94.44	36	2	0	84	119	1844	1879	3e-06	56
XLOC_000958	NONMMUT026622.2	100	38	0	0	6675	6712	1209	1172	2e-11	75.8
XLOC_000960	NONMMUT026622.2	94.59	37	2	0	146	182	1208	1172	1e-07	58
XLOC_000962	NONMMUT032692.2	91.84	49	4	0	475	523	19	67	1e-09	65.9
XLOC_000964	NONMMUT045556.2	100	24	0	0	34	57	616	593	0.0003	48.1
XLOC_000965	NONMMUT135361.1	97.06	34	1	0	2	35	50	17	8e-08	60
XLOC_000969	NONMMUT053852.2	90.58	191	17	1	6700	6890	5724	5913	4e-57	228
XLOC_000969	NONMMUT053852.2	90.58	191	17	1	6832	7022	5724	5913	4e-57	228
XLOC_000969	NONMMUT053852.2	90.58	191	17	1	6623	6813	5724	5913	4e-57	228
XLOC_000970	NONMMUT030273.2	100	24	0	0	458	481	1949	1926	0.0003	48.1
XLOC_000971	NONMMUT072803.2	96.77	31	1	0	1225	1255	1190	1220	1e-05	54
XLOC_000974	NONMMUT118629.1	93.94	33	2	0	664	696	32	64	0.0001	50.1
XLOC_000977	NONMMUT130088.1	92	75	6	0	245	319	508	582	1e-20	101
XLOC_000977	NONMMUT130088.1	92	75	6	0	227	301	508	582	1e-20	101
XLOC_000977	NONMMUT130088.1	92	75	6	0	194	268	508	582	1e-20	101
XLOC_000977	NONMMUT130088.1	92	75	6	0	245	319	508	582	1e-20	101
XLOC_000977	NONMMUT130088.1	92	75	6	0	541	615	508	582	3e-20	101
XLOC_000989	NONMMUT092510.1	92.31	39	3	0	851	889	934	972	1e-05	54
XLOC_000990	NONMMUT070345.2	93.62	47	3	0	908	954	21	67	1e-10	69.9
XLOC_000990	NONMMUT070345.2	93.62	47	3	0	1109	1155	21	67	3e-10	69.9
XLOC_000991	NONMMUT024071.2	92.05	151	7	3	59	209	622	767	7e-46	184
XLOC_000992	NONMMUT063270.2	94.44	36	2	0	763	798	617	652	3e-06	56
XLOC_000992	NONMMUT096134.1	93.91	115	7	0	139	253	399	513	2e-41	172
XLOC_000992	NONMMUT063270.2	94.44	36	2	0	706	741	617	652	3e-06	56
XLOC_000992	NONMMUT015813.2	97.22	36	0	1	401	436	4413	4447	3e-06	56
XLOC_000992	NONMMUT015813.2	97.22	36	0	1	294	329	4413	4447	3e-06	56
XLOC_000994	NONMMUT125517.1	100	25	0	0	203	227	1083	1107	4e-05	50.1
XLOC_000994	NONMMUT008099.2	100	28	0	0	1	28	2068	2095	9e-07	56
XLOC_000994	NONMMUT125517.1	100	25	0	0	290	314	1083	1107	5e-05	50.1
XLOC_000995	NONMMUT070345.2	87.72	57	7	0	114	170	76	20	2e-07	58
XLOC_000996	NONMMUT057333.2	93.62	47	3	0	46	92	79	33	3e-10	69.9
XLOC_000996	NONMMUT121617.1	94.12	34	2	0	799	832	891	858	7e-05	52
XLOC_001001	NONMMUT070345.2	87.3	63	8	0	1210	1272	67	5	1e-07	61.9
XLOC_001001	NONMMUT070345.2	87.3	63	8	0	1588	1650	67	5	2e-07	61.9
XLOC_001003	NONMMUT070345.2	90.91	55	5	0	766	820	25	79	5e-10	69.9
XLOC_001004	NONMMUT057333.2	89.55	67	7	0	36	102	12	78	2e-13	77.8
XLOC_001005	NONMMUT124000.1	89.47	57	5	1	113	169	281	226	9e-07	58
XLOC_001006	NONMMUT024281.2	90.17	173	14	2	2197	2368	2700	2870	1e-47	194
XLOC_001008	NONMMUT066491.2	100	25	0	0	85	109	3187	3163	7e-05	50.1
XLOC_001017	NONMMUT011403.2	100	24	0	0	570	593	1358	1381	0.0004	48.1
XLOC_001017	NONMMUT011403.2	100	24	0	0	597	620	1358	1381	0.0004	48.1
XLOC_001021	NONMMUT129803.1	100	24	0	0	84	107	2212	2235	0.0006	48.1
XLOC_001021	NONMMUT129803.1	100	24	0	0	84	107	2212	2235	0.0008	48.1
XLOC_001021	NONMMUT129803.1	100	24	0	0	15	38	2212	2235	0.0009	48.1
XLOC_001021	NONMMUT129803.1	100	24	0	0	15	38	2212	2235	0.001	48.1
XLOC_001024	NONMMUT070345.2	97.37	38	1	0	294	331	20	57	7e-10	67.9
XLOC_001027	NONMMUT051389.2	100	28	0	0	1054	1081	473	446	4e-06	56
XLOC_001027	NONMMUT131284.1	96.43	28	1	0	22	49	442	415	0.0004	48.1
XLOC_001027	NONMMUT131284.1	96.43	28	1	0	22	49	442	415	0.0004	48.1
XLOC_001027	NONMMUT131284.1	96.43	28	1	0	22	49	442	415	0.0006	48.1
XLOC_001030	NONMMUT111185.1	96.88	32	1	0	232	263	601	570	2e-06	56
XLOC_001030	NONMMUT111185.1	96.88	32	1	0	333	364	601	570	3e-06	56
XLOC_001032	NONMMUT122916.1	88.89	63	7	0	1122	1184	2846	2908	2e-10	69.9
XLOC_001034	NONMMUT115475.1	92.86	42	3	0	1286	1327	659	700	3e-07	60
XLOC_001034	NONMMUT115475.1	92.86	42	3	0	1225	1266	659	700	3e-07	60
XLOC_001034	NONMMUT115475.1	92.86	42	3	0	991	1032	659	700	3e-07	60
XLOC_001034	NONMMUT115475.1	92.86	42	3	0	1937	1978	659	700	4e-07	60
XLOC_001034	NONMMUT115475.1	92.86	42	3	0	997	1038	659	700	3e-07	60
XLOC_001035	NONMMUT070345.2	90.67	75	7	0	1852	1926	2	76	3e-17	93.7
XLOC_001037	NONMMUT024626.2	92.39	92	7	0	34	125	391	482	2e-27	127
XLOC_001037	NONMMUT024626.2	90.35	114	11	0	4	117	369	482	1e-31	139
XLOC_001040	NONMMUT067179.2	92.31	39	3	0	62	100	22	60	3e-06	54
XLOC_001041	NONMMUT041957.2	90.45	178	11	3	334	510	175	3	4e-50	200
XLOC_001043	NONMMUT100994.1	90.74	54	4	1	630	683	78	130	1e-07	60
XLOC_001050	NONMMUT005547.2	96.88	32	1	0	182	213	1845	1876	2e-06	56
XLOC_001051	NONMMUT041885.2	100	25	0	0	992	1016	2112	2136	0.0002	50.1
XLOC_001066	NONMMUT076326.1	96.43	28	1	0	102	129	3086	3059	0.0001	48.1
XLOC_001072	NONMMUT088203.1	94.64	56	2	1	2761	2816	3652	3706	6e-13	79.8
XLOC_001073	NONMMUT072652.2	96.3	27	1	0	38	64	2991	3017	0.0007	46.1
XLOC_001079	NONMMUT041407.2	93.64	110	7	0	433	542	416	307	1e-38	163
XLOC_001080	NONMMUT025071.2	96.77	31	1	0	243	273	2539	2569	9e-06	54
XLOC_001080	NONMMUT025071.2	96.77	31	1	0	243	273	2539	2569	1e-05	54
XLOC_001085	NONMMUT015005.2	100	24	0	0	51	74	501	524	0.0002	48.1
XLOC_001085	NONMMUT032692.2	90.24	41	4	0	69	109	10	50	0.0001	50.1
XLOC_001085	NONMMUT032692.2	90.24	41	4	0	69	109	10	50	9e-05	50.1
XLOC_001087	NONMMUT136467.1	100	24	0	0	1	24	73	50	0.0002	48.1
XLOC_001088	NONMMUT041118.2	87.3	126	16	0	215	340	202	77	4e-27	123
XLOC_001089	NONMMUT055409.2	87.3	63	8	0	1375	1437	67	5	8e-08	61.9
XLOC_001089	NONMMUT055409.2	87.3	63	8	0	1375	1437	67	5	1e-07	61.9
XLOC_001089	NONMMUT055409.2	87.3	63	8	0	1375	1437	67	5	1e-07	61.9
XLOC_001089	NONMMUT041053.2	94.12	34	2	0	181	214	2378	2345	3e-05	52
XLOC_001089	NONMMUT006977.2	96.3	27	1	0	286	312	2507	2533	0.0007	46.1
XLOC_001090	NONMMUT122916.1	95	40	2	0	634	673	2910	2871	8e-09	63.9
XLOC_001094	NONMMUT072306.2	100	31	0	0	1492	1522	551	581	1e-07	61.9
XLOC_001094	NONMMUT072306.2	100	31	0	0	1492	1522	551	581	1e-07	61.9
XLOC_001094	NONMMUT072306.2	100	31	0	0	1492	1522	551	581	1e-07	61.9
XLOC_001097	NONMMUT108249.1	83.87	93	14	1	1811	1902	165	73	1e-06	58
XLOC_001097	NONMMUT108249.1	85.16	128	14	2	2107	2229	165	38	2e-17	93.7
XLOC_001097	NONMMUT108249.1	85.26	156	16	3	2029	2177	165	10	1e-22	111
XLOC_001098	NONMMUT040903.2	92.55	255	12	3	227	475	978	725	6e-77	291
XLOC_001098	NONMMUT040903.2	92.55	255	12	3	227	475	978	725	6e-77	291
XLOC_001098	NONMMUT040903.2	92.55	255	12	3	227	475	978	725	7e-77	291
XLOC_001098	NONMMUT040903.2	92.55	255	12	3	227	475	978	725	1e-76	291
XLOC_001098	NONMMUT040903.2	92.55	255	12	3	227	475	978	725	1e-76	291
XLOC_001098	NONMMUT040903.2	92.55	255	12	3	227	475	978	725	1e-76	291
XLOC_001098	NONMMUT040903.2	92.55	255	12	3	227	475	978	725	1e-76	291
XLOC_001100	NONMMUT119229.1	100	26	0	0	3	28	615	640	1e-05	52
XLOC_001114	NONMMUT011890.2	100	25	0	0	70	94	2891	2867	0.0002	50.1
XLOC_001117	NONMMUT132715.1	92	50	3	1	116	165	1314	1362	4e-08	60
XLOC_001128	NONMMUT071051.2	93.75	32	2	0	592	623	995	1026	0.0006	48.1
XLOC_001128	NONMMUT071051.2	93.75	32	2	0	592	623	995	1026	0.0004	48.1
XLOC_001128	NONMMUT071051.2	93.75	32	2	0	239	270	995	1026	0.0004	48.1
XLOC_001128	NONMMUT071051.2	93.75	32	2	0	311	342	995	1026	0.0005	48.1
XLOC_001130	NONMMUT121409.1	91.89	37	3	0	212	248	199	163	5e-05	50.1
XLOC_001130	NONMMUT121409.1	91.89	37	3	0	212	248	199	163	0.0002	50.1
XLOC_001131	NONMMUT031441.2	84.68	111	17	0	1853	1963	1772	1882	7e-15	85.7
XLOC_001131	NONMMUT031441.2	84.68	111	17	0	1853	1963	1772	1882	7e-15	85.7
XLOC_001131	NONMMUT031441.2	84.68	111	17	0	1853	1963	1772	1882	7e-15	85.7
XLOC_001131	NONMMUT109838.1	84.09	88	14	0	701	788	1896	1809	1e-08	63.9
XLOC_001147	NONMMUT095516.1	81.4	129	24	0	6375	6503	848	720	2e-08	65.9
XLOC_001147	NONMMUT095516.1	81.4	129	24	0	6375	6503	848	720	2e-08	65.9
XLOC_001147	NONMMUT095516.1	81.4	129	24	0	6375	6503	848	720	2e-08	65.9
XLOC_001147	NONMMUT095516.1	81.4	129	24	0	6375	6503	848	720	2e-08	65.9
XLOC_001150	NONMMUT053633.2	92.59	54	3	1	91	144	502	450	3e-10	67.9
XLOC_001151	NONMMUT020806.2	100	33	0	0	417	449	743	711	8e-09	65.9
XLOC_001152	NONMMUT135361.1	92.59	54	3	1	101	154	63	11	2e-09	67.9
XLOC_001154	NONMMUT131708.1	100	26	0	0	437	462	831	856	4e-05	52
XLOC_001155	NONMMUT065286.2	92.5	40	3	0	80	119	725	686	2e-06	56
XLOC_001155	NONMMUT065286.2	92.5	40	3	0	80	119	725	686	2e-06	56
XLOC_001155	NONMMUT124020.1	90	50	5	0	556	605	3339	3290	1e-07	60
XLOC_001159	NONMMUT069306.2	100	24	0	0	1723	1746	1063	1040	0.001	48.1
XLOC_001159	NONMMUT069306.2	100	24	0	0	1375	1398	1063	1040	0.0008	48.1
XLOC_001159	NONMMUT069306.2	100	24	0	0	294	317	1063	1040	0.0002	48.1
XLOC_001160	NONMMUT028199.2	90	40	4	0	1523	1562	1240	1201	0.0009	48.1
XLOC_001161	NONMMUT070345.2	87.67	73	9	0	4192	4264	76	4	5e-11	73.8
XLOC_001163	NONMMUT057333.2	91.11	45	4	0	1316	1360	67	23	1e-06	58
XLOC_001163	NONMMUT057333.2	91.11	45	4	0	1316	1360	67	23	1e-06	58
XLOC_001163	NONMMUT057333.2	91.11	45	4	0	1316	1360	67	23	1e-06	58
XLOC_001163	NONMMUT003886.2	94.59	37	2	0	260	296	1091	1055	4e-07	58
XLOC_001166	NONMMUT117587.1	88.33	60	6	1	13	72	384	442	1e-06	56
XLOC_001166	NONMMUT117587.1	88.33	60	6	1	13	72	384	442	2e-06	56
XLOC_001172	NONMMUT032692.2	94.87	39	2	0	124	162	17	55	2e-08	61.9
XLOC_001174	NONMMUT040370.2	90.48	42	4	0	797	838	3082	3123	4e-05	52
XLOC_001177	NONMMUT032692.2	92.86	56	4	0	596	651	66	11	1e-13	79.8
XLOC_001179	NONMMUT045346.2	93.75	32	2	0	44	75	2585	2554	0.0004	48.1
XLOC_001179	NONMMUT045346.2	93.75	32	2	0	44	75	2585	2554	0.0004	48.1
XLOC_001179	NONMMUT045346.2	93.75	32	2	0	44	75	2585	2554	0.0003	48.1
XLOC_001183	NONMMUT119149.1	98.7	77	1	0	210	286	82	6	9e-34	145
XLOC_001186	NONMMUT075505.1	97.06	34	1	0	550	583	637	670	1e-07	60
XLOC_001189	NONMMUT109656.1	100	28	0	0	16	43	514	487	2e-06	56
XLOC_001190	NONMMUT008367.2	87.32	71	7	1	322	390	390	320	5e-09	63.9
XLOC_001192	NONMMUT040514.2	87.64	89	11	0	8	96	300	388	6e-17	89.7
XLOC_001193	NONMMUT109441.1	90.38	52	4	1	1011	1062	431	481	5e-06	56
XLOC_001193	NONMMUT109441.1	90.38	52	4	1	1011	1062	431	481	5e-06	56
XLOC_001207	NONMMUT096139.1	97.87	94	2	0	8352	8445	1917	2010	5e-40	170
XLOC_001207	NONMMUT096139.1	97.87	94	2	0	8352	8445	1917	2010	5e-40	170
XLOC_001207	NONMMUT096139.1	97.87	94	2	0	8352	8445	1917	2010	5e-40	170
XLOC_001207	NONMMUT096139.1	97.87	94	2	0	8352	8445	1917	2010	5e-40	170
XLOC_001207	NONMMUT096139.1	97.87	94	2	0	8352	8445	1917	2010	5e-40	170
XLOC_001207	NONMMUT096139.1	97.87	94	2	0	8352	8445	1917	2010	5e-40	170
XLOC_001207	NONMMUT096139.1	97.89	95	2	0	8352	8446	1917	2011	1e-40	172
XLOC_001207	NONMMUT096139.1	97.87	94	2	0	8352	8445	1917	2010	5e-40	170
XLOC_001208	NONMMUT054524.2	100	25	0	0	1740	1764	151	175	0.0003	50.1
XLOC_001208	NONMMUT054524.2	100	25	0	0	427	451	151	175	9e-05	50.1
XLOC_001214	NONMMUT118555.1	92.73	55	3	1	83	137	911	858	2e-10	69.9
XLOC_001216	NONMMUT124394.1	87.69	260	31	1	2151	2410	551	809	1e-65	254
XLOC_001216	NONMMUT124394.1	87.69	260	31	1	2151	2410	551	809	1e-65	254
XLOC_001217	NONMMUT038061.2	96.88	32	1	0	799	830	173	142	7e-06	56
XLOC_001217	NONMMUT038061.2	96.88	32	1	0	799	830	173	142	7e-06	56
XLOC_001217	NONMMUT020266.2	90.48	63	6	0	575	637	67	5	3e-12	77.8
XLOC_001217	NONMMUT020266.2	90.48	63	6	0	575	637	67	5	2e-12	77.8
XLOC_001218	NONMMUT056062.2	100	26	0	0	78	103	256	281	1e-05	52
XLOC_001220	NONMMUT097469.1	90	160	13	1	219	375	269	110	5e-46	186
XLOC_001220	NONMMUT097469.1	90	160	13	1	219	375	269	110	1e-45	186
XLOC_001220	NONMMUT097469.1	90	160	13	1	219	375	269	110	7e-46	186
XLOC_001220	NONMMUT097470.1	89.55	201	14	2	221	414	435	235	1e-57	226
XLOC_001234	NONMMUT108128.1	96.97	33	1	0	184	216	279	311	5e-07	58
XLOC_001238	NONMMUT041326.2	97.3	37	1	0	2357	2393	256	292	1e-08	65.9
XLOC_001243	NONMMUT008099.2	96.55	29	1	0	22	50	2067	2095	0.0001	50.1
XLOC_001243	NONMMUT008099.2	96.55	29	1	0	22	50	2067	2095	0.0001	50.1
XLOC_002085	NONMMUT058611.2	82.02	406	44	11	4612	4995	1268	870	1e-33	149
XLOC_002088	NONMMUT070345.2	89.36	47	5	0	39	85	21	67	5e-06	54
XLOC_002090	NONMMUT058932.2	98.36	61	1	0	3287	3347	751	811	4e-23	113
XLOC_002099	NONMMUT102858.1	94.44	36	2	0	87	122	238	203	3e-06	56
XLOC_002103	NONMMUT129066.1	92.68	41	2	1	72	112	97	136	4e-05	50.1
XLOC_002106	NONMMUT135928.1	83.19	119	20	0	245	363	176	294	2e-12	77.8
XLOC_002107	NONMMUT073254.2	84.75	118	16	1	513	628	215	332	2e-15	85.7
XLOC_002108	NONMMUT015363.2	91.67	36	3	0	209	244	1670	1635	0.0003	48.1
XLOC_002113	NONMMUT124544.1	88.24	51	6	0	105	155	220	170	2e-06	54
XLOC_002117	NONMMUT059306.2	91.82	330	15	4	658	985	396	715	4e-105	385
XLOC_002117	NONMMUT059306.2	91.82	330	15	4	964	1291	396	715	5e-105	385
XLOC_002117	NONMMUT059306.2	91.82	330	15	4	604	931	396	715	4e-105	385
XLOC_002119	NONMMUT109091.1	100	26	0	0	197	222	1428	1403	7e-06	52
XLOC_002120	NONMMUT059351.2	93.18	44	3	0	1	44	245	288	1e-08	63.9
XLOC_002125	NONMMUT059525.2	91.24	194	17	0	565	758	412	219	1e-64	250
XLOC_002125	NONMMUT059525.2	91.24	194	17	0	543	736	412	219	1e-64	250
XLOC_002126	NONMMUT034977.2	97.22	36	1	0	554	589	1018	983	6e-09	63.9
XLOC_002131	NONMMUT126562.1	88.52	61	7	0	512	572	166	226	1e-09	65.9
XLOC_002132	NONMMUT049458.2	92.5	40	3	0	1	40	2068	2107	8e-07	56
XLOC_002136	NONMMUT097586.1	100	40	0	0	287	326	40	1	1e-13	79.8
XLOC_002137	NONMMUT040289.2	100	31	0	0	4517	4547	1216	1186	2e-07	61.9
XLOC_002137	NONMMUT040289.2	100	31	0	0	4532	4562	1216	1186	2e-07	61.9
XLOC_002137	NONMMUT040289.2	100	31	0	0	3426	3456	1216	1186	2e-07	61.9
XLOC_002137	NONMMUT040289.2	100	31	0	0	58	88	1216	1186	4e-08	61.9
XLOC_002144	NONMMUT096484.1	89.9	99	8	2	4	102	73	169	2e-20	101
XLOC_002145	NONMMUT005449.2	91.23	57	4	1	422	478	2265	2210	1e-09	65.9
XLOC_002152	NONMMUT070345.2	91.23	57	5	0	3145	3201	1	57	4e-11	73.8
XLOC_002153	NONMMUT097721.1	97.83	46	1	0	1000	1045	156	111	1e-14	83.8
XLOC_002153	NONMMUT097721.1	97.83	46	1	0	832	877	156	111	9e-15	83.8
XLOC_002153	NONMMUT097721.1	97.83	46	1	0	718	763	156	111	7e-15	83.8
XLOC_002155	NONMMUT096543.1	91.43	35	3	0	1	35	218	252	0.0008	46.1
XLOC_002159	NONMMUT070345.2	89.29	56	6	0	803	858	2	57	1e-08	63.9
XLOC_002159	NONMMUT070345.2	89.29	56	6	0	316	371	2	57	1e-08	63.9
XLOC_002165	NONMMUT129071.1	94.74	38	2	0	920	957	2601	2564	1e-07	60
XLOC_002166	NONMMUT002115.2	95	40	2	0	879	918	1797	1836	1e-08	63.9
XLOC_002166	NONMMUT002115.2	95	40	2	0	714	753	1797	1836	9e-09	63.9
XLOC_002166	NONMMUT081263.1	90	40	4	0	711	750	75	36	0.001	48.1
XLOC_002167	NONMMUT067206.2	92.11	38	3	0	23	60	636	673	3e-05	52
XLOC_002168	NONMMUT008138.2	90.7	43	4	0	122	164	617	659	4e-06	54
XLOC_002169	NONMMUT091854.1	94.59	37	2	0	44	80	208	244	2e-07	58
XLOC_002170	NONMMUT081246.1	85.78	232	26	2	123	354	225	1	5e-41	170
XLOC_002173	NONMMUT040289.2	100	30	0	0	4	33	1186	1215	1e-07	60
XLOC_002183	NONMMUT007413.2	86.54	260	30	2	2838	3092	1747	2006	9e-58	228
XLOC_002186	NONMMUT082614.1	86.1	295	40	1	427	720	182	476	2e-65	252
XLOC_002186	NONMMUT082614.1	85.91	291	40	1	251	540	182	472	4e-63	244
XLOC_002186	NONMMUT082614.1	86.1	295	40	1	167	460	182	476	1e-65	252
XLOC_002186	NONMMUT082614.1	86.1	295	40	1	242	535	182	476	1e-65	252
XLOC_002186	NONMMUT082614.1	86.1	295	40	1	190	483	182	476	1e-65	252
XLOC_002186	NONMMUT082614.1	86.1	295	40	1	224	517	182	476	1e-65	252
XLOC_002188	NONMMUT094265.1	92.11	38	3	0	2694	2731	258	295	0.0001	52
XLOC_002191	NONMMUT129066.1	93.88	49	2	1	623	671	96	143	2e-09	65.9
XLOC_002196	NONMMUT082548.1	87.76	98	12	0	757	854	157	254	2e-19	99.6
XLOC_002196	NONMMUT082548.1	87.76	98	12	0	655	752	157	254	1e-19	99.6
XLOC_002201	NONMMUT040289.2	93.48	46	3	0	660	705	1224	1179	4e-10	67.9
XLOC_002205	NONMMUT116229.1	92	50	3	1	1726	1775	857	809	3e-07	60
XLOC_002205	NONMMUT116229.1	92	50	3	1	1573	1622	857	809	3e-07	60
XLOC_002205	NONMMUT116229.1	92	50	3	1	1312	1361	857	809	3e-07	60
XLOC_002205	NONMMUT116229.1	92	50	3	1	1496	1545	857	809	3e-07	60
XLOC_002205	NONMMUT116229.1	92	50	3	1	1444	1493	857	809	3e-07	60
XLOC_002205	NONMMUT116229.1	92	50	3	1	1136	1185	857	809	3e-07	60
XLOC_002205	NONMMUT116229.1	92	50	3	1	1444	1493	857	809	3e-07	60
XLOC_002205	NONMMUT116229.1	92	50	3	1	1164	1213	857	809	3e-07	60
XLOC_002206	NONMMUT007133.2	92.98	114	2	3	990	1103	596	703	6e-33	145
XLOC_002214	NONMMUT053576.2	94.12	34	2	0	276	309	91	124	3e-05	52
XLOC_002214	NONMMUT011234.2	94.12	34	2	0	595	628	3067	3034	3e-05	52
XLOC_002216	NONMMUT101028.1	92.31	39	3	0	1811	1849	270	308	2e-05	54
XLOC_002220	NONMMUT136271.1	92	50	3	1	372	421	1584	1536	1e-07	60
XLOC_002220	NONMMUT136271.1	92	50	3	1	374	423	1584	1536	1e-07	60
XLOC_002224	NONMMUT006842.2	96.43	28	1	0	1	28	89	116	0.0007	48.1
XLOC_002225	NONMMUT082409.1	87.12	163	20	1	151	313	297	458	6e-35	149
XLOC_002225	NONMMUT006822.2	93.31	239	16	0	1022	1260	169	407	8e-94	347
XLOC_002225	NONMMUT006822.2	93.31	239	16	0	1033	1271	169	407	8e-94	347
XLOC_002225	NONMMUT006822.2	93.31	239	16	0	621	859	169	407	6e-94	347
XLOC_002226	NONMMUT070345.2	93.1	58	4	0	840	897	19	76	1e-14	83.8
XLOC_002230	NONMMUT135361.1	90.57	53	4	1	3290	3342	12	63	2e-06	58
XLOC_002230	NONMMUT135361.1	90.57	53	4	1	3238	3290	12	63	2e-06	58
XLOC_002232	NONMMUT129071.1	94.74	38	2	0	493	530	2601	2564	8e-08	60
XLOC_002233	NONMMUT006581.2	87.88	66	8	0	212	277	59	124	3e-10	67.9
XLOC_002233	NONMMUT006581.2	87.88	66	8	0	202	267	59	124	2e-10	67.9
XLOC_002233	NONMMUT006581.2	87.88	66	8	0	194	259	59	124	2e-10	67.9
XLOC_002234	NONMMUT086195.1	91.67	36	3	0	600	635	541	506	0.0005	48.1
XLOC_002236	NONMMUT006621.2	93.06	346	18	4	319	659	33	377	6e-130	468
XLOC_002240	NONMMUT127397.1	96.55	29	1	0	109	137	1361	1333	7e-05	50.1
XLOC_002244	NONMMUT070345.2	92.31	52	4	0	3257	3308	16	67	4e-10	71.9
XLOC_002244	NONMMUT097778.1	82.79	122	21	0	1036	1157	605	726	4e-12	75.8
XLOC_002246	NONMMUT043908.2	100	30	0	0	318	347	798	827	5e-08	60
XLOC_002250	NONMMUT097781.1	92.86	56	3	1	1173	1228	4258	4204	8e-11	71.9
XLOC_002258	NONMMUT025683.2	90.48	42	4	0	43	84	581	540	2e-05	52
XLOC_002259	NONMMUT069236.2	96.43	28	1	0	28	55	480	453	0.0001	48.1
XLOC_002261	NONMMUT121694.1	88.52	61	6	1	1045	1105	639	580	1e-06	58
XLOC_002263	NONMMUT104798.1	91.07	56	4	1	1757	1812	3320	3266	2e-08	63.9
XLOC_002266	NONMMUT063034.2	90.48	42	4	0	747	788	2171	2212	6e-05	52
XLOC_002268	NONMMUT070345.2	89.55	67	7	0	1090	1156	10	76	2e-12	77.8
XLOC_002272	NONMMUT093818.1	91.89	37	3	0	33	69	530	494	0.0004	50.1
XLOC_002272	NONMMUT055409.2	100	26	0	0	933	958	275	250	0.0001	52
XLOC_002272	NONMMUT055409.2	100	26	0	0	933	958	275	250	5e-05	52
XLOC_002276	NONMMUT122916.1	97.37	38	1	0	32	69	2871	2908	2e-10	67.9
XLOC_002277	NONMMUT102064.1	94.59	37	2	0	150	186	688	724	2e-07	58
XLOC_002280	NONMMUT136671.1	93.94	33	2	0	2009	2041	429	397	0.0003	50.1
XLOC_002281	NONMMUT011491.2	100	26	0	0	563	588	187	212	7e-05	52
XLOC_002282	NONMMUT119441.1	92.86	42	2	1	646	687	450	490	0.0001	52
XLOC_002282	NONMMUT119441.1	92.86	42	2	1	302	343	450	490	0.0001	52
XLOC_002286	NONMMUT063034.2	89.13	46	5	0	45	90	2171	2216	0.0001	52
XLOC_002286	NONMMUT063034.2	89.13	46	5	0	29	74	2171	2216	1e-05	52
XLOC_002286	NONMMUT063034.2	89.13	46	5	0	28	73	2171	2216	3e-05	52
XLOC_002286	NONMMUT063034.2	89.13	46	5	0	25	70	2171	2216	0.0001	52
XLOC_002289	NONMMUT003384.2	96.67	30	1	0	206	235	984	1013	2e-05	52
XLOC_002290	NONMMUT136448.1	100	28	0	0	19	46	1905	1932	2e-06	56
XLOC_002290	NONMMUT136448.1	92.68	41	3	0	3	43	1892	1932	6e-07	58
XLOC_002293	NONMMUT102064.1	90.32	62	5	1	1229	1290	687	747	2e-09	67.9
XLOC_002294	NONMMUT032692.2	94	50	3	0	422	471	19	68	3e-12	75.8
XLOC_002301	NONMMUT041957.2	100	23	0	0	215	237	1161	1183	0.0005	46.1
XLOC_002303	NONMMUT045362.2	96.67	30	1	0	353	382	1235	1264	4e-05	52
XLOC_002305	NONMMUT014466.2	94.29	35	2	0	829	863	256	290	1e-05	54
XLOC_002310	NONMMUT032692.2	97.56	41	1	0	445	485	50	10	2e-11	73.8
XLOC_002311	NONMMUT047919.2	86.27	102	13	1	26	126	393	292	2e-15	83.8
XLOC_002316	NONMMUT123047.1	90.24	41	4	0	4210	4250	426	386	0.0006	50.1
XLOC_002322	NONMMUT084060.1	100	25	0	0	3155	3179	1901	1925	0.0006	50.1
XLOC_002333	NONMMUT132412.1	91.67	36	3	0	809	844	376	341	0.0006	48.1
XLOC_002333	NONMMUT132412.1	91.67	36	3	0	809	844	376	341	0.0007	48.1
XLOC_002334	NONMMUT025915.2	91.07	56	4	1	1213	1268	1353	1407	2e-08	63.9
XLOC_002334	NONMMUT063034.2	90	40	4	0	674	713	2171	2210	0.0006	48.1
XLOC_002335	NONMMUT072341.2	92.73	55	4	0	342	396	106	160	2e-13	77.8
XLOC_002337	NONMMUT039064.2	92.31	52	3	1	173	224	1132	1182	4e-09	63.9
XLOC_002338	NONMMUT059043.2	81.51	119	22	0	23	141	516	398	2e-08	61.9
XLOC_002339	NONMMUT072458.2	80.56	180	35	0	95	274	9	188	2e-13	79.8
XLOC_002339	NONMMUT072458.2	80.56	180	35	0	95	274	9	188	4e-13	79.8
XLOC_002342	NONMMUT032692.2	92.16	51	4	0	5518	5568	60	10	1e-09	69.9
XLOC_002346	NONMMUT032420.2	89.06	64	7	0	586	649	64	1	2e-11	71.9
XLOC_002352	NONMMUT124530.1	93.97	199	8	2	371	569	1471	1277	9e-59	232
XLOC_002355	NONMMUT115931.1	100	24	0	0	700	723	196	173	0.0004	48.1
XLOC_002366	NONMMUT059465.2	100	23	0	0	142	164	84	106	0.0006	46.1
XLOC_002369	NONMMUT077642.1	100	23	0	0	283	305	11	33	0.0007	46.1
XLOC_002373	NONMMUT129547.1	93.55	31	2	0	226	256	3806	3836	0.001	46.1
XLOC_002376	NONMMUT014761.2	100	24	0	0	46	69	539	516	0.0005	48.1
XLOC_002376	NONMMUT014761.2	100	24	0	0	46	69	539	516	0.0004	48.1
XLOC_002376	NONMMUT014761.2	100	24	0	0	46	69	539	516	0.0005	48.1
XLOC_002381	NONMMUT024927.2	98.97	97	1	0	568	664	1	97	3e-45	184
XLOC_002388	NONMMUT032692.2	96.88	32	1	0	3	34	50	19	2e-06	56
XLOC_002390	NONMMUT067179.2	91.67	48	4	0	69	116	118	165	2e-08	63.9
XLOC_002390	NONMMUT067179.2	91.67	48	4	0	69	116	118	165	2e-08	63.9
XLOC_002394	NONMMUT097752.1	98.59	71	1	0	568	638	625	555	7e-30	133
XLOC_002395	NONMMUT025160.2	94.74	76	4	0	178	253	984	909	1e-25	119
XLOC_002395	NONMMUT025160.2	94.74	76	4	0	186	261	984	909	1e-25	119
XLOC_002395	NONMMUT025160.2	94.81	77	4	0	409	485	985	909	5e-26	121
XLOC_002401	NONMMUT008186.2	92.55	94	7	0	943	1036	1377	1470	6e-29	131
XLOC_002401	NONMMUT008186.2	92.31	91	7	0	943	1033	1377	1467	4e-27	125
XLOC_002401	NONMMUT008186.2	92.47	93	7	0	466	558	1378	1470	1e-28	129
XLOC_002401	NONMMUT008186.2	92.22	90	7	0	466	555	1378	1467	1e-26	123
XLOC_002402	NONMMUT055409.2	93.94	33	2	0	1247	1279	283	251	0.0002	50.1
XLOC_002404	NONMMUT008156.2	96.77	31	1	0	57	87	907	877	1e-05	54
XLOC_002404	NONMMUT008156.2	96.77	31	1	0	57	87	907	877	2e-05	54
XLOC_002404	NONMMUT121578.1	100	29	0	0	1646	1674	682	710	1e-06	58
XLOC_002406	NONMMUT081250.1	92	50	4	0	470	519	50	1	3e-10	67.9
XLOC_002407	NONMMUT121578.1	94.87	39	2	0	18	56	698	660	2e-08	61.9
XLOC_002407	NONMMUT116019.1	87.93	58	6	1	188	245	609	665	3e-05	52
XLOC_002407	NONMMUT116019.1	87.93	58	6	1	188	245	609	665	3e-05	52
XLOC_002407	NONMMUT116019.1	87.93	58	6	1	188	245	609	665	3e-05	52
XLOC_002412	NONMMUT007991.2	86.63	202	24	3	109	307	4246	4045	1e-25	121
XLOC_002413	NONMMUT099538.1	92.21	77	6	0	1095	1171	1	77	6e-21	105
XLOC_002414	NONMMUT007991.2	82.67	300	48	3	940	1237	621	324	8e-38	161
XLOC_002428	NONMMUT032989.2	95.12	41	2	0	527	567	2520	2480	2e-09	65.9
XLOC_002436	NONMMUT055409.2	91.67	48	4	0	80	127	68	21	3e-08	63.9
XLOC_002436	NONMMUT055409.2	91.67	48	4	0	80	127	68	21	3e-08	63.9
XLOC_002436	NONMMUT055409.2	91.67	48	4	0	80	127	68	21	4e-08	63.9
XLOC_002439	NONMMUT124055.1	94	100	6	0	1118	1217	141	42	8e-35	151
XLOC_002439	NONMMUT124055.1	94	100	6	0	1856	1955	141	42	1e-34	151
XLOC_002440	NONMMUT104960.1	90.91	44	4	0	28	71	139	182	6e-07	56
XLOC_002448	NONMMUT080725.1	89.23	65	7	0	1	65	160	96	3e-12	73.8
XLOC_002457	NONMMUT037017.2	88.37	43	5	0	98	140	376	334	0.0007	46.1
XLOC_002457	NONMMUT037017.2	88.37	43	5	0	98	140	376	334	0.0009	46.1
XLOC_002460	NONMMUT092933.1	88.33	60	6	1	134	193	93	151	2e-06	56
XLOC_002460	NONMMUT092933.1	88.33	60	6	1	134	193	93	151	2e-06	56
XLOC_002460	NONMMUT092933.1	88.33	60	6	1	134	193	93	151	2e-06	56
XLOC_002465	NONMMUT069582.2	97.06	34	1	0	1118	1151	2079	2046	2e-07	60
XLOC_002470	NONMMUT002573.2	86.89	61	7	1	223	282	2548	2488	9e-05	50.1
XLOC_002470	NONMMUT002573.2	86.89	61	7	1	223	282	2548	2488	9e-05	50.1
XLOC_002472	NONMMUT126111.1	91.67	36	3	0	1494	1529	616	581	0.001	48.1
XLOC_002476	NONMMUT053969.2	93.18	44	2	1	406	449	1016	974	1e-06	56
XLOC_002479	NONMMUT057333.2	91.07	56	5	0	510	565	22	77	5e-11	71.9
XLOC_002479	NONMMUT057333.2	91.07	56	5	0	510	565	22	77	5e-11	71.9
XLOC_002479	NONMMUT057333.2	91.07	56	5	0	510	565	22	77	5e-11	71.9
XLOC_002479	NONMMUT057333.2	91.07	56	5	0	510	565	22	77	5e-11	71.9
XLOC_002479	NONMMUT057333.2	91.07	56	5	0	510	565	22	77	6e-11	71.9
XLOC_002482	NONMMUT070345.2	85.94	64	9	0	671	734	79	16	5e-06	56
XLOC_002482	NONMMUT070345.2	85.94	64	9	0	671	734	79	16	4e-06	56
XLOC_002482	NONMMUT070345.2	85.94	64	9	0	671	734	79	16	4e-06	56
XLOC_002483	NONMMUT051389.2	94.44	36	2	0	58	93	446	481	1e-06	56
XLOC_002485	NONMMUT135114.1	85.71	84	11	1	1098	1180	698	781	1e-08	63.9
XLOC_002486	NONMMUT025071.2	85.71	63	9	0	489	551	2516	2578	8e-06	54
XLOC_002486	NONMMUT025071.2	85.71	63	9	0	640	702	2516	2578	1e-05	54
XLOC_002486	NONMMUT025071.2	85.71	63	9	0	614	676	2516	2578	1e-05	54
XLOC_002486	NONMMUT020578.2	100	23	0	0	12	34	2434	2456	0.0005	46.1
XLOC_002490	NONMMUT054196.2	90.2	51	5	0	124	174	907	857	1e-08	61.9
XLOC_002490	NONMMUT054196.2	90.2	51	5	0	87	137	907	857	1e-08	61.9
XLOC_002491	NONMMUT071377.2	92.86	42	3	0	358	399	421	462	1e-07	60
XLOC_002491	NONMMUT071377.2	92.86	42	3	0	358	399	421	462	1e-07	60
XLOC_002491	NONMMUT071377.2	92.86	42	3	0	358	399	421	462	2e-07	60
XLOC_002491	NONMMUT071377.2	92.86	42	3	0	358	399	421	462	2e-07	60
XLOC_002491	NONMMUT071377.2	92.86	42	3	0	358	399	421	462	2e-07	60
XLOC_002492	NONMMUT057333.2	89.66	58	6	0	1778	1835	10	67	2e-09	67.9
XLOC_002492	NONMMUT057333.2	89.66	58	6	0	1778	1835	10	67	3e-09	67.9
XLOC_002492	NONMMUT057333.2	89.66	58	6	0	1778	1835	10	67	3e-09	67.9
XLOC_002492	NONMMUT057333.2	89.66	58	6	0	1778	1835	10	67	3e-09	67.9
XLOC_002492	NONMMUT057333.2	89.66	58	6	0	1778	1835	10	67	3e-09	67.9
XLOC_002493	NONMMUT070345.2	88.68	53	6	0	4367	4419	23	75	3e-06	58
XLOC_002493	NONMMUT070345.2	88.68	53	6	0	4367	4419	23	75	3e-06	58
XLOC_002494	NONMMUT086543.1	90	60	5	1	140	199	519	461	4e-08	63.9
XLOC_002495	NONMMUT015947.2	91.43	35	3	0	357	391	226	260	0.0008	46.1
XLOC_002496	NONMMUT134386.1	92.45	53	3	1	906	958	1645	1594	2e-09	65.9
XLOC_002496	NONMMUT038424.2	96.97	33	1	0	970	1002	704	736	6e-07	58
XLOC_002496	NONMMUT108538.1	97.3	37	1	0	1105	1141	139	175	3e-09	65.9
XLOC_002496	NONMMUT108538.1	97.3	37	1	0	1085	1121	139	175	3e-09	65.9
XLOC_002500	NONMMUT119244.1	84.39	205	26	4	1478	1676	521	317	7e-27	125
XLOC_002500	NONMMUT119244.1	84.39	205	26	4	1478	1676	521	317	7e-27	125
XLOC_002501	NONMMUT128081.1	90.32	62	5	1	36	97	126	186	2e-10	67.9
XLOC_002504	NONMMUT119364.1	88.52	183	21	0	290	472	1675	1857	4e-49	196
XLOC_002504	NONMMUT119364.1	89.84	128	13	0	217	344	1675	1802	2e-35	151
XLOC_002505	NONMMUT119370.1	92.79	499	24	3	4922	5420	1869	2355	0	698
XLOC_002505	NONMMUT054408.2	91.25	617	42	7	4695	5307	869	261	0	708
XLOC_002505	NONMMUT054412.2	92.77	235	13	2	2575	2809	359	129	9e-73	278
XLOC_002505	NONMMUT119370.1	91.01	612	39	6	5797	6404	1869	2468	0	749
XLOC_002505	NONMMUT119370.1	91.01	612	39	6	2135	2742	1869	2468	0	749
XLOC_002505	NONMMUT054411.2	92.93	198	7	3	5648	5845	202	12	8e-69	266
XLOC_002505	NONMMUT054411.2	92.93	198	7	3	5845	6042	202	12	8e-69	266
XLOC_002505	NONMMUT119370.1	82.23	546	53	14	5039	5565	1292	1812	1e-67	262
XLOC_002505	NONMMUT119370.1	90.43	752	47	10	758	1499	1869	2605	0	844
XLOC_002507	NONMMUT033380.2	100	23	0	0	121	143	1210	1232	0.0004	46.1
XLOC_002510	NONMMUT132777.1	95.24	42	1	1	221	262	183	143	1e-07	60
XLOC_002511	NONMMUT057333.2	90	50	5	0	5	54	68	19	1e-07	60
XLOC_002524	NONMMUT131457.1	96.67	30	1	0	856	885	463	492	4e-05	52
XLOC_002524	NONMMUT032692.2	95.45	44	2	0	45	88	12	55	6e-11	71.9
XLOC_002524	NONMMUT032692.2	95.45	44	2	0	45	88	12	55	8e-11	71.9
XLOC_002529	NONMMUT119162.1	100	24	0	0	276	299	392	415	0.0003	48.1
XLOC_002537	NONMMUT098512.1	88.89	54	5	1	215	268	4115	4167	9e-06	52
XLOC_002539	NONMMUT080237.1	93.62	47	3	0	862	908	719	673	1e-10	69.9
XLOC_002546	NONMMUT037206.2	89.22	102	11	0	104	205	108	209	5e-25	115
XLOC_002546	NONMMUT037206.2	89.11	101	11	0	110	210	109	209	2e-24	113
XLOC_002548	NONMMUT037328.2	85.45	110	14	1	100	209	126	233	1e-15	85.7
XLOC_002550	NONMMUT098988.1	89.58	48	4	1	687	734	4694	4740	0.0004	48.1
XLOC_002550	NONMMUT098988.1	89.58	48	4	1	831	878	4694	4740	0.0005	48.1
XLOC_002550	NONMMUT098988.1	89.58	48	4	1	491	538	4694	4740	0.0003	48.1
XLOC_002550	NONMMUT098988.1	89.58	48	4	1	483	530	4694	4740	0.0003	48.1
XLOC_002557	NONMMUT136529.1	92	50	3	1	113	162	8782	8830	8e-08	60
XLOC_002558	NONMMUT095512.1	94.12	34	2	0	399	432	1342	1375	4e-05	52
XLOC_002559	NONMMUT055409.2	86.67	75	8	2	659	732	5	78	1e-05	54
XLOC_002562	NONMMUT107147.1	90.91	44	3	1	1	43	28	71	0.0003	48.1
XLOC_002562	NONMMUT107148.1	90.16	61	5	1	35	94	1287	1347	1e-09	65.9
XLOC_002564	NONMMUT037655.2	90.82	207	19	0	275	481	313	519	2e-67	260
XLOC_002567	NONMMUT037671.2	88.12	160	18	1	179	338	22	180	1e-37	159
XLOC_002567	NONMMUT037671.2	88.12	160	18	1	179	338	22	180	1e-37	159
XLOC_002567	NONMMUT037671.2	88.12	160	18	1	160	319	22	180	1e-37	159
XLOC_002567	NONMMUT037671.2	88.12	160	18	1	151	310	22	180	6e-37	159
XLOC_002567	NONMMUT037671.2	88.12	160	18	1	151	310	22	180	1e-37	159
XLOC_002567	NONMMUT107173.1	88.33	60	7	0	210	269	2	61	6e-09	63.9
XLOC_002568	NONMMUT037687.2	84.88	86	12	1	1668	1752	116	201	3e-07	60
XLOC_002572	NONMMUT037753.2	96.77	93	3	0	178	270	1614	1706	8e-38	161
XLOC_002572	NONMMUT037753.2	96.77	93	3	0	140	232	1614	1706	3e-38	161
XLOC_002574	NONMMUT109175.1	90	40	4	0	16	55	83	44	0.0001	48.1
XLOC_002575	NONMMUT104744.1	91.49	47	4	0	512	558	87	41	5e-08	61.9
XLOC_002578	NONMMUT107272.1	83.73	166	26	1	345	509	679	844	4e-22	107
XLOC_002581	NONMMUT107292.1	94.64	112	5	1	1	112	75	185	4e-40	167
XLOC_002584	NONMMUT037992.2	92.65	68	5	0	16	83	120	187	1e-18	95.6
XLOC_002586	NONMMUT107340.1	83.44	459	64	4	160	606	2833	3291	2e-67	258
XLOC_002586	NONMMUT107340.1	83.44	459	64	4	79	525	2833	3291	2e-67	258
XLOC_002586	NONMMUT107340.1	83.44	459	64	4	236	682	2833	3291	2e-67	258
XLOC_002589	NONMMUT038063.2	87.26	259	29	2	2044	2300	3382	3638	3e-61	240
XLOC_002591	NONMMUT107376.1	95.35	43	2	0	293	335	291	333	6e-11	69.9
XLOC_002607	NONMMUT125319.1	100	25	0	0	36	60	670	694	0.0002	50.1
XLOC_002608	NONMMUT070345.2	91.67	48	4	0	34	81	20	67	9e-09	63.9
XLOC_002611	NONMMUT075475.1	94.23	52	3	0	473	524	219	270	2e-13	79.8
XLOC_002612	NONMMUT000986.2	91.36	324	28	0	102	425	66	389	1e-115	420
XLOC_002614	NONMMUT121578.1	91.84	49	4	0	40	88	660	708	1e-09	65.9
XLOC_002628	NONMMUT076346.1	88.68	53	5	1	1720	1772	135	84	0.0003	50.1
XLOC_002632	NONMMUT075573.1	92.9	324	21	2	93	415	392	714	4e-123	444
XLOC_002637	NONMMUT001321.2	85.92	412	54	2	4009	4420	1136	729	7e-93	345
XLOC_002638	NONMMUT128317.1	100	23	0	0	192	214	1406	1384	0.0005	46.1
XLOC_002639	NONMMUT075630.1	84.78	289	33	4	151	438	5	283	1e-51	206
XLOC_002642	NONMMUT070345.2	90.57	53	5	0	2133	2185	5	57	2e-08	65.9
XLOC_002643	NONMMUT075662.1	100	40	0	0	284	323	5	44	1e-13	79.8
XLOC_002653	NONMMUT137560.1	100	25	0	0	436	460	502	478	7e-05	50.1
XLOC_002653	NONMMUT137560.1	100	25	0	0	522	546	502	478	9e-05	50.1
XLOC_002653	NONMMUT137560.1	100	25	0	0	428	452	502	478	7e-05	50.1
XLOC_002653	NONMMUT137560.1	100	25	0	0	202	226	502	478	4e-05	50.1
XLOC_002653	NONMMUT137560.1	100	25	0	0	256	280	502	478	5e-05	50.1
XLOC_002654	NONMMUT075786.1	97.5	40	1	0	61	100	1	40	2e-11	71.9
XLOC_002654	NONMMUT075786.1	97.5	40	1	0	51	90	1	40	2e-11	71.9
XLOC_002655	NONMMUT115335.1	96.55	29	1	0	151	179	797	769	7e-05	50.1
XLOC_002656	NONMMUT032692.2	91.38	58	5	0	515	572	10	67	3e-12	75.8
XLOC_002656	NONMMUT032692.2	91.38	58	5	0	606	663	10	67	3e-12	75.8
XLOC_002658	NONMMUT071047.2	96.43	28	1	0	1239	1266	1004	977	0.0007	48.1
XLOC_002658	NONMMUT071047.2	96.43	28	1	0	705	732	1004	977	0.0004	48.1
XLOC_002663	NONMMUT121578.1	89.36	47	5	0	589	635	661	707	1e-05	54
XLOC_002666	NONMMUT039064.2	91.84	49	3	1	202	250	1136	1183	3e-07	58
XLOC_002667	NONMMUT001779.2	93.67	79	5	0	199	277	454	532	5e-25	117
XLOC_002667	NONMMUT001779.2	93.67	79	5	0	115	193	454	532	4e-25	117
XLOC_002668	NONMMUT103060.1	100	24	0	0	659	682	5129	5106	0.0005	48.1
XLOC_002668	NONMMUT103060.1	100	24	0	0	932	955	5129	5106	0.0006	48.1
XLOC_002668	NONMMUT103060.1	100	24	0	0	832	855	5129	5106	0.0006	48.1
XLOC_002668	NONMMUT103060.1	100	24	0	0	258	281	5129	5106	0.0002	48.1
XLOC_002670	NONMMUT085755.1	91.23	57	4	1	2273	2329	944	999	6e-09	65.9
XLOC_002671	NONMMUT093701.1	92.86	42	2	1	994	1035	869	909	4e-05	52
XLOC_002671	NONMMUT093701.1	92.86	42	2	1	961	1002	869	909	4e-05	52
XLOC_002671	NONMMUT093701.1	92.86	42	2	1	607	648	869	909	3e-05	52
XLOC_002672	NONMMUT060953.2	92.41	79	6	0	214	292	1	79	5e-23	109
XLOC_002674	NONMMUT001878.2	90.48	63	6	0	138	200	1	63	1e-13	77.8
XLOC_002675	NONMMUT001878.2	86.67	195	26	0	1	195	293	487	4e-44	180
XLOC_002677	NONMMUT078194.1	90.73	151	14	0	253	403	684	534	9e-47	188
XLOC_002680	NONMMUT053633.2	100	35	0	0	1699	1733	450	484	8e-10	69.9
XLOC_002693	NONMMUT076005.1	80.15	131	26	0	33	163	68	198	2e-05	54
XLOC_002697	NONMMUT108140.1	92	50	3	1	929	978	462	510	1e-07	60
XLOC_002697	NONMMUT040264.2	100	24	0	0	310	333	259	236	0.0005	48.1
XLOC_002697	NONMMUT108140.1	92	50	3	1	653	702	462	510	1e-07	60
XLOC_002697	NONMMUT070345.2	92.59	54	4	0	915	968	4	57	8e-12	75.8
XLOC_002697	NONMMUT070345.2	92.59	54	4	0	1184	1237	4	57	9e-12	75.8
XLOC_002697	NONMMUT070345.2	92.59	54	4	0	1051	1104	4	57	8e-12	75.8
XLOC_002697	NONMMUT070345.2	92.59	54	4	0	2460	2513	4	57	1e-11	75.8
XLOC_002697	NONMMUT070345.2	92.59	54	4	0	696	749	4	57	8e-12	75.8
XLOC_002697	NONMMUT032692.2	93.75	48	3	0	1090	1137	10	57	5e-11	71.9
XLOC_002697	NONMMUT070345.2	92.59	54	4	0	802	855	4	57	8e-12	75.8
XLOC_002699	NONMMUT136535.1	92.5	40	3	0	1	40	432	393	1e-06	56
XLOC_002707	NONMMUT037129.2	87.25	204	23	3	99	301	541	742	1e-32	141
XLOC_002711	NONMMUT059647.2	93.33	45	3	0	262	306	2319	2363	2e-09	65.9
XLOC_002712	NONMMUT037360.2	96.43	28	1	0	53	80	99	72	0.0001	48.1
XLOC_002717	NONMMUT134532.1	91.23	57	4	1	133	189	828	883	2e-09	65.9
XLOC_002719	NONMMUT041276.2	91.11	45	4	0	129	173	4389	4433	5e-07	58
XLOC_002719	NONMMUT041276.2	91.11	45	4	0	129	173	4389	4433	5e-07	58
XLOC_002721	NONMMUT008416.2	94.44	36	2	0	229	264	2992	2957	1e-06	56
XLOC_002722	NONMMUT015454.2	96.77	31	1	0	24	54	958	928	3e-06	54
XLOC_002723	NONMMUT121578.1	90	40	4	0	44	83	660	699	0.0008	48.1
XLOC_002723	NONMMUT121578.1	90	40	4	0	44	83	660	699	0.0004	48.1
XLOC_002725	NONMMUT101102.1	94.87	39	2	0	1090	1128	187	225	8e-08	61.9
XLOC_002726	NONMMUT109178.1	96.3	81	3	0	519	599	327	247	5e-31	137
XLOC_002730	NONMMUT037990.2	90.57	53	5	0	698	750	165	113	2e-09	65.9
XLOC_002730	NONMMUT109226.1	88.94	823	72	9	646	1466	3214	2409	0	858
XLOC_002730	NONMMUT109226.1	88.94	823	72	9	646	1466	3214	2409	0	858
XLOC_002730	NONMMUT109226.1	88.94	823	72	9	646	1466	3214	2409	0	858
XLOC_002731	NONMMUT070345.2	82.93	82	14	0	859	940	10	91	4e-05	52
XLOC_002731	NONMMUT070345.2	82.93	82	14	0	859	940	10	91	4e-05	52
XLOC_002731	NONMMUT109231.1	86.75	83	11	0	799	881	563	481	6e-13	77.8
XLOC_002733	NONMMUT089270.1	100	26	0	0	9	34	769	744	7e-05	52
XLOC_002735	NONMMUT088245.1	94.12	34	2	0	829	862	412	445	5e-05	52
XLOC_002735	NONMMUT088245.1	94.12	34	2	0	780	813	412	445	6e-05	52
XLOC_002737	NONMMUT098535.1	90.91	44	4	0	608	651	231	188	3e-06	56
XLOC_002739	NONMMUT068513.2	94.29	35	2	0	93	127	2071	2105	7e-06	54
XLOC_002739	NONMMUT068513.2	94.29	35	2	0	93	127	2071	2105	3e-06	54
XLOC_002739	NONMMUT070345.2	93.75	32	2	0	47	78	50	19	0.0004	48.1
XLOC_002739	NONMMUT070345.2	93.75	32	2	0	47	78	50	19	0.0007	48.1
XLOC_002746	NONMMUT096531.1	90.48	42	4	0	2257	2298	681	722	8e-05	52
XLOC_002748	NONMMUT024875.2	100	27	0	0	180	206	975	949	5e-06	54
XLOC_002749	NONMMUT011949.2	89.09	55	5	1	227	281	23	76	1e-05	54
XLOC_002749	NONMMUT057333.2	90.57	53	5	0	968	1020	24	76	4e-09	65.9
XLOC_002750	NONMMUT077833.1	91.43	35	3	0	214	248	281	247	0.001	46.1
XLOC_002751	NONMMUT000985.2	93.63	1004	44	11	472	1462	1899	903	0	1279
XLOC_002753	NONMMUT000986.2	91.36	324	28	0	1194	1517	66	389	7e-116	420
XLOC_002754	NONMMUT108637.1	94.59	37	2	0	3	39	568	532	3e-07	58
XLOC_002754	NONMMUT108637.1	94.59	37	2	0	3	39	568	532	4e-07	58
XLOC_002755	NONMMUT020806.2	100	30	0	0	49	78	743	714	6e-08	60
XLOC_002757	NONMMUT020806.2	96.67	30	1	0	156	185	743	714	2e-05	52
XLOC_002763	NONMMUT136560.1	100	25	0	0	139	163	3331	3355	0.0001	50.1
XLOC_002768	NONMMUT131623.1	100	26	0	0	1	26	328	303	3e-05	52
XLOC_002770	NONMMUT078027.1	88.37	43	5	0	185	227	183	141	0.0007	46.1
XLOC_002770	NONMMUT078027.1	88.37	43	5	0	183	225	183	141	0.0007	46.1
XLOC_002780	NONMMUT050818.2	96.43	28	1	0	147	174	1286	1259	0.0004	48.1
XLOC_002784	NONMMUT001629.2	97.5	40	1	0	1230	1269	273	234	5e-11	71.9
XLOC_002785	NONMMUT134508.1	85.9	78	10	1	397	473	281	204	3e-07	60
XLOC_002786	NONMMUT071594.2	79.27	193	40	0	8	200	484	676	8e-10	65.9
XLOC_002786	NONMMUT071594.2	79.27	193	40	0	8	200	484	676	8e-10	65.9
XLOC_002791	NONMMUT001686.2	85.96	228	29	2	1225	1450	246	20	8e-45	184
XLOC_002795	NONMMUT079260.1	95.65	46	2	0	235	280	690	735	3e-12	75.8
XLOC_002795	NONMMUT079260.1	95.65	46	2	0	235	280	690	735	3e-12	75.8
XLOC_002795	NONMMUT079260.1	95.65	46	2	0	235	280	690	735	3e-12	75.8
XLOC_002796	NONMMUT121525.1	83.51	97	13	1	2624	2717	3154	3058	1e-07	61.9
XLOC_002796	NONMMUT100516.1	86.15	65	9	0	1848	1912	13416	13352	2e-06	58
XLOC_002800	NONMMUT108128.1	87.93	58	7	0	408	465	322	265	7e-08	60
XLOC_002803	NONMMUT069762.2	100	29	0	0	254	282	1674	1702	8e-07	58
XLOC_002803	NONMMUT069762.2	100	29	0	0	254	282	1674	1702	5e-07	58
XLOC_002803	NONMMUT069762.2	100	29	0	0	254	282	1674	1702	7e-07	58
XLOC_002803	NONMMUT069762.2	100	29	0	0	254	282	1674	1702	1e-06	58
XLOC_002813	NONMMUT078764.1	93.55	31	2	0	102	132	1112	1142	0.0005	46.1
XLOC_002819	NONMMUT055409.2	94.59	37	2	0	2549	2585	57	21	2e-06	58
XLOC_002819	NONMMUT055409.2	94.59	37	2	0	662	698	57	21	1e-06	58
XLOC_002820	NONMMUT134453.1	96.97	33	1	0	220	252	710	678	7e-07	58
XLOC_002825	NONMMUT070345.2	97.3	37	1	0	642	678	21	57	2e-09	65.9
XLOC_002833	NONMMUT088125.1	88.8	259	26	2	1391	1648	151	407	3e-70	270
XLOC_002833	NONMMUT040289.2	95.12	41	2	0	1195	1235	1227	1187	1e-08	65.9
XLOC_002833	NONMMUT088125.1	88.8	259	26	2	1312	1569	151	407	3e-70	270
XLOC_002833	NONMMUT088125.1	86	100	12	1	1210	1309	151	248	7e-14	81.8
XLOC_002833	NONMMUT088125.1	86	100	12	1	1312	1411	151	248	8e-14	81.8
XLOC_002833	NONMMUT088125.1	88.8	259	26	2	1748	2005	151	407	4e-70	270
XLOC_002833	NONMMUT088128.1	84.62	208	30	2	104	310	2	208	1e-32	143
XLOC_002833	NONMMUT088125.1	86	100	12	1	1729	1828	151	248	9e-14	81.8
XLOC_002833	NONMMUT088125.1	88.8	259	26	2	974	1231	151	407	3e-70	270
XLOC_002842	NONMMUT031472.2	100	23	0	0	150	172	435	413	0.0007	46.1
XLOC_002842	NONMMUT013697.2	88.68	53	5	1	199	250	1177	1229	7e-05	50.1
XLOC_002843	NONMMUT015947.2	94.87	39	2	0	1031	1069	227	265	4e-08	61.9
XLOC_002843	NONMMUT015947.2	94.87	39	2	0	895	933	227	265	4e-08	61.9
XLOC_002847	NONMMUT104744.1	92.45	53	4	0	658	710	87	35	1e-11	73.8
XLOC_002848	NONMMUT014466.2	83.91	174	27	1	1030	1202	119	292	4e-24	115
XLOC_002851	NONMMUT132254.1	91.11	45	4	0	209	253	6206	6162	5e-07	58
XLOC_002851	NONMMUT132254.1	91.11	45	4	0	192	236	6206	6162	5e-07	58
XLOC_002851	NONMMUT132254.1	91.11	45	4	0	197	241	6206	6162	5e-07	58
XLOC_002852	NONMMUT133722.1	90.24	41	4	0	278	318	510	470	0.0001	50.1
XLOC_002853	NONMMUT086351.1	85.34	116	17	0	192	307	1247	1132	1e-18	95.6
XLOC_002861	NONMMUT045894.2	96.3	27	1	0	65	91	812	786	0.0005	46.1
XLOC_002861	NONMMUT045894.2	96.3	27	1	0	104	130	812	786	0.0005	46.1
XLOC_002866	NONMMUT087877.1	93.16	234	16	0	373	606	66	299	8e-81	303
XLOC_002871	NONMMUT098988.1	92.16	51	3	1	1418	1468	4683	4732	7e-08	61.9
XLOC_002878	NONMMUT040289.2	97.62	42	1	0	778	819	1227	1186	4e-12	75.8
XLOC_002881	NONMMUT055190.2	92.86	56	3	1	139	194	900	954	2e-11	71.9
XLOC_002882	NONMMUT008099.2	96.43	28	1	0	378	405	2095	2068	0.0002	48.1
XLOC_002885	NONMMUT055409.2	91.38	58	5	0	178	235	10	67	4e-12	75.8
XLOC_002887	NONMMUT049732.2	91.67	36	3	0	357	392	840	875	0.0005	48.1
XLOC_002887	NONMMUT051792.2	87.5	88	11	0	6	93	52	139	4e-16	87.7
XLOC_002890	NONMMUT014466.2	89.19	74	8	0	2496	2569	211	284	4e-14	83.8
XLOC_002892	NONMMUT023905.2	100	23	0	0	3	25	1693	1715	0.0005	46.1
XLOC_002899	NONMMUT030701.2	91.86	86	7	0	259	344	116	201	9e-25	115
XLOC_002899	NONMMUT030701.2	91.86	86	7	0	774	859	116	201	2e-24	115
XLOC_002903	NONMMUT030747.2	93.04	345	24	0	1	345	350	6	7e-138	494
XLOC_002903	NONMMUT030748.2	95.29	191	5	3	256	445	38	225	1e-75	285
XLOC_002903	NONMMUT030748.2	95.34	193	5	3	600	791	36	225	1e-76	289
XLOC_002904	NONMMUT097493.1	97.44	39	1	0	625	663	1957	1919	1e-10	69.9
XLOC_002904	NONMMUT025446.2	100	24	0	0	176	199	3652	3675	0.0008	48.1
XLOC_002904	NONMMUT025446.2	100	24	0	0	176	199	3652	3675	0.0006	48.1
XLOC_002904	NONMMUT094109.1	96.77	31	1	0	65	95	3144	3114	1e-05	54
XLOC_002905	NONMMUT030811.2	84.15	82	12	1	306	387	605	525	5e-05	52
XLOC_002905	NONMMUT030811.2	84.15	82	12	1	306	387	605	525	6e-05	52
XLOC_002905	NONMMUT030811.2	84.15	82	12	1	306	387	605	525	6e-05	52
XLOC_002905	NONMMUT030811.2	84.15	82	12	1	306	387	605	525	0.0001	52
XLOC_002905	NONMMUT030811.2	84.15	82	12	1	306	387	605	525	7e-05	52
XLOC_002905	NONMMUT032692.2	91.38	58	5	0	1710	1767	10	67	5e-12	75.8
XLOC_002905	NONMMUT030811.2	84.15	82	12	1	306	387	605	525	3e-05	52
XLOC_002905	NONMMUT030811.2	84.15	82	12	1	306	387	605	525	6e-05	52
XLOC_002905	NONMMUT030811.2	84.15	82	12	1	105	186	605	525	4e-05	52
XLOC_002905	NONMMUT032692.2	91.38	58	5	0	958	1015	10	67	3e-12	75.8
XLOC_002905	NONMMUT032692.2	91.38	58	5	0	959	1016	10	67	3e-12	75.8
XLOC_002909	NONMMUT129999.1	97.14	35	1	0	422	456	141	107	3e-08	61.9
XLOC_002912	NONMMUT070345.2	91.23	57	5	0	1680	1736	20	76	2e-11	73.8
XLOC_002912	NONMMUT070345.2	91.23	57	5	0	1279	1335	20	76	2e-11	73.8
XLOC_002916	NONMMUT033116.2	91.89	37	3	0	346	382	2904	2940	6e-05	50.1
XLOC_002919	NONMMUT085502.1	96.55	29	1	0	335	363	1233	1205	7e-05	50.1
XLOC_002924	NONMMUT076859.1	100	27	0	0	803	829	2118	2092	2e-05	54
XLOC_002925	NONMMUT075574.1	94.59	37	2	0	347	383	5727	5763	1e-06	58
XLOC_002927	NONMMUT009086.2	87.37	95	12	0	439	533	115	21	1e-17	93.7
XLOC_002927	NONMMUT009086.2	86.32	117	16	0	485	601	137	21	3e-21	105
XLOC_002929	NONMMUT009085.2	88.05	159	19	0	247	405	741	899	5e-39	165
XLOC_002929	NONMMUT009085.2	86.9	84	11	0	3	86	816	899	2e-13	79.8
XLOC_002929	NONMMUT009085.2	92.68	41	3	0	10	50	859	899	7e-07	58
XLOC_002930	NONMMUT009081.2	85.48	186	21	4	1653	1835	1225	1043	2e-27	127
XLOC_002933	NONMMUT040289.2	91.11	45	4	0	1268	1312	1227	1183	1e-06	58
XLOC_002933	NONMMUT040289.2	91.11	45	4	0	1304	1348	1227	1183	1e-06	58
XLOC_002933	NONMMUT040289.2	91.11	45	4	0	2217	2261	1227	1183	2e-06	58
XLOC_002933	NONMMUT040289.2	91.11	45	4	0	1434	1478	1227	1183	1e-06	58
XLOC_002933	NONMMUT040289.2	91.11	45	4	0	1349	1393	1227	1183	1e-06	58
XLOC_002933	NONMMUT040289.2	91.11	45	4	0	1440	1484	1227	1183	1e-06	58
XLOC_002933	NONMMUT040289.2	91.11	45	4	0	991	1035	1227	1183	1e-06	58
XLOC_002933	NONMMUT040289.2	91.11	45	4	0	777	821	1227	1183	8e-07	58
XLOC_002933	NONMMUT040289.2	91.11	45	4	0	744	788	1227	1183	8e-07	58
XLOC_002933	NONMMUT040289.2	91.11	45	4	0	682	726	1227	1183	8e-07	58
XLOC_002933	NONMMUT040289.2	91.11	45	4	0	675	719	1227	1183	8e-07	58
XLOC_002933	NONMMUT040289.2	91.11	45	4	0	574	618	1227	1183	7e-07	58
XLOC_002933	NONMMUT040289.2	91.11	45	4	0	530	574	1227	1183	7e-07	58
XLOC_002935	NONMMUT008946.2	95.31	64	2	1	852	914	93	30	3e-18	95.6
XLOC_002939	NONMMUT026775.2	85.71	140	20	0	88	227	37	176	9e-26	119
XLOC_002939	NONMMUT069762.2	93.94	33	2	0	22	54	1674	1706	7e-05	50.1
XLOC_002940	NONMMUT070345.2	93.62	47	3	0	681	727	21	67	1e-10	69.9
XLOC_002940	NONMMUT070345.2	93.62	47	3	0	595	641	21	67	1e-10	69.9
XLOC_002940	NONMMUT070345.2	93.62	47	3	0	681	727	21	67	1e-10	69.9
XLOC_002955	NONMMUT057588.2	85.06	154	13	3	96	243	89	238	9e-24	113
XLOC_002955	NONMMUT070345.2	92.86	42	3	0	224	265	51	10	2e-07	60
XLOC_002961	NONMMUT131871.1	100	29	0	0	4	32	236	264	2e-07	58
XLOC_002964	NONMMUT071578.2	90.37	135	12	1	117	250	1201	1335	2e-37	157
XLOC_002964	NONMMUT071578.2	80.24	334	66	0	145	478	2000	2333	2e-31	139
XLOC_002964	NONMMUT071578.2	96.88	32	1	0	5	36	1406	1437	5e-07	56
XLOC_002964	NONMMUT071578.2	80.81	297	57	0	541	837	1942	2238	8e-31	137
XLOC_002964	NONMMUT071578.2	80.8	349	67	0	485	833	1942	2290	7e-38	161
XLOC_002964	NONMMUT071578.2	80.61	392	76	0	350	741	1942	2333	4e-42	174
XLOC_002971	NONMMUT070345.2	91.67	48	4	0	1754	1801	67	20	2e-08	63.9
XLOC_002979	NONMMUT057336.2	90.62	64	6	0	5	68	148	85	2e-13	79.8
XLOC_002980	NONMMUT117658.1	90.24	41	4	0	916	956	3083	3123	0.0002	50.1
XLOC_002981	NONMMUT126590.1	83.74	123	20	0	950	1072	906	784	5e-15	85.7
XLOC_002981	NONMMUT126590.1	83.74	123	20	0	1149	1271	906	784	5e-15	85.7
XLOC_002981	NONMMUT126590.1	83.74	123	20	0	1175	1297	906	784	5e-15	85.7
XLOC_002989	NONMMUT000557.2	92	75	6	0	350	424	2641	2567	5e-20	101
XLOC_002989	NONMMUT000557.2	92	75	6	0	763	837	2641	2567	7e-20	101
XLOC_002990	NONMMUT077601.1	86.24	109	12	2	989	1096	301	195	2e-14	83.8
XLOC_002992	NONMMUT075255.1	90.48	42	4	0	518	559	195	236	4e-05	52
XLOC_002992	NONMMUT075255.1	90.48	42	4	0	550	591	195	236	4e-05	52
XLOC_002992	NONMMUT075255.1	90.48	42	4	0	231	272	195	236	3e-05	52
XLOC_002993	NONMMUT051189.2	96.55	29	1	0	496	524	860	888	9e-05	50.1
XLOC_002993	NONMMUT051189.2	96.55	29	1	0	207	235	860	888	5e-05	50.1
XLOC_002999	NONMMUT054831.2	97.22	36	1	0	381	416	337	372	7e-09	63.9
XLOC_003002	NONMMUT122074.1	92	50	4	0	1737	1786	981	1030	1e-09	67.9
XLOC_003002	NONMMUT122074.1	92	50	4	0	1851	1900	981	1030	1e-09	67.9
XLOC_003006	NONMMUT000729.2	98.99	199	2	0	9	207	21	219	5e-103	379
XLOC_003006	NONMMUT000729.2	98.88	179	2	0	1	179	41	219	2e-91	339
XLOC_003006	NONMMUT000729.2	98.88	179	2	0	1	179	41	219	2e-91	339
XLOC_003006	NONMMUT000729.2	98.86	175	2	0	1	175	45	219	9e-89	331
XLOC_003006	NONMMUT075324.1	99.21	126	1	0	1	126	19	144	9e-63	242
XLOC_003006	NONMMUT075324.1	99.21	126	1	0	1	126	19	144	8e-63	242
XLOC_003006	NONMMUT075324.1	99.21	126	1	0	1	126	19	144	5e-62	242
XLOC_003006	NONMMUT075324.1	99.21	126	1	0	1	126	19	144	7e-63	242
XLOC_003006	NONMMUT075338.1	90.12	81	8	0	1194	1274	477	557	9e-19	97.6
XLOC_003006	NONMMUT122916.1	95	40	2	0	2178	2217	2871	2910	3e-08	63.9
XLOC_003006	NONMMUT122916.1	95	40	2	0	2581	2620	2871	2910	3e-08	63.9
XLOC_003006	NONMMUT122916.1	95	40	2	0	2201	2240	2871	2910	3e-08	63.9
XLOC_003006	NONMMUT122916.1	95	40	2	0	2169	2208	2871	2910	3e-08	63.9
XLOC_003006	NONMMUT104727.1	93.55	31	2	0	218	248	207	237	0.001	46.1
XLOC_003008	NONMMUT000745.2	95.52	223	10	0	678	900	8	230	1e-98	363
XLOC_003009	NONMMUT000747.2	89.64	280	28	1	4070	4349	2553	2831	2e-84	317
XLOC_003011	NONMMUT075365.1	93.38	136	8	1	842	977	1492	1626	6e-47	190
XLOC_003011	NONMMUT092933.1	91.94	62	4	1	93	154	92	152	3e-12	75.8
XLOC_003011	NONMMUT097778.1	82.01	139	24	1	1689	1826	605	743	6e-10	69.9
XLOC_003011	NONMMUT077706.1	90.68	236	21	1	1	236	235	1	1e-75	285
XLOC_003017	NONMMUT136448.1	95	40	2	0	146	185	1891	1930	7e-09	63.9
XLOC_003017	NONMMUT136448.1	95	40	2	0	146	185	1891	1930	7e-09	63.9
XLOC_003017	NONMMUT136448.1	95	40	2	0	145	184	1891	1930	3e-09	63.9
XLOC_003017	NONMMUT136448.1	95	40	2	0	128	167	1891	1930	5e-09	63.9
XLOC_003020	NONMMUT136535.1	92.31	39	3	0	533	571	394	432	7e-06	54
XLOC_003020	NONMMUT136535.1	92.31	39	3	0	474	512	394	432	7e-06	54
XLOC_003021	NONMMUT002468.2	83.33	144	24	0	341	484	295	438	2e-18	95.6
XLOC_003022	NONMMUT078802.1	89.26	149	16	0	102	250	535	683	2e-40	168
XLOC_003022	NONMMUT078802.1	89.26	149	16	0	102	250	535	683	2e-40	168
XLOC_003022	NONMMUT078802.1	89.26	149	16	0	102	250	535	683	2e-40	168
XLOC_003026	NONMMUT054345.2	100	30	0	0	1069	1098	186	215	2e-07	60
XLOC_003027	NONMMUT088745.1	92.86	42	3	0	895	936	764	723	1e-07	60
XLOC_003030	NONMMUT070345.2	91.3	46	4	0	1470	1515	22	67	3e-07	60
XLOC_003034	NONMMUT059591.2	97.37	38	1	0	496	533	1303	1266	5e-10	67.9
XLOC_003034	NONMMUT059591.2	97.37	38	1	0	527	564	1303	1266	5e-10	67.9
XLOC_003036	NONMMUT125517.1	92.11	38	3	0	45	82	3560	3597	2e-05	52
XLOC_003050	NONMMUT011548.2	96.55	29	1	0	643	671	1583	1611	0.0001	50.1
XLOC_003050	NONMMUT011548.2	96.55	29	1	0	563	591	1583	1611	9e-05	50.1
XLOC_003052	NONMMUT055409.2	100	26	0	0	699	724	250	275	3e-05	52
XLOC_003057	NONMMUT109570.1	97.3	37	1	0	50	86	381	417	1e-09	65.9
XLOC_003057	NONMMUT109570.1	97.3	37	1	0	28	64	381	417	9e-10	65.9
XLOC_003069	NONMMUT086807.1	87.5	144	16	2	1442	1583	1513	1370	1e-27	127
XLOC_003069	NONMMUT086807.1	87.5	144	16	2	1354	1495	1513	1370	2e-27	127
XLOC_003071	NONMMUT040289.2	95.24	42	2	0	425	466	1186	1227	6e-10	67.9
XLOC_003072	NONMMUT088153.1	90	50	5	0	1281	1330	260	309	3e-07	60
XLOC_003072	NONMMUT088153.1	90	50	5	0	1187	1236	260	309	3e-07	60
XLOC_003072	NONMMUT086789.1	88.89	72	8	0	3254	3325	263	192	5e-13	79.8
XLOC_003072	NONMMUT086789.1	82.76	87	15	0	421	507	503	417	6e-06	54
XLOC_003072	NONMMUT086789.1	88.81	143	14	2	829	971	263	123	5e-32	141
XLOC_003073	NONMMUT004735.2	100	24	0	0	185	208	2750	2773	0.0005	48.1
XLOC_003073	NONMMUT004735.2	100	24	0	0	210	233	2750	2773	0.0005	48.1
XLOC_003079	NONMMUT070345.2	89.66	58	6	0	658	715	67	10	2e-09	67.9
XLOC_003084	NONMMUT070345.2	94.74	38	2	0	1810	1847	57	20	4e-07	60
XLOC_003093	NONMMUT068513.2	87.5	48	6	0	1272	1319	2085	2132	0.0008	48.1
XLOC_003102	NONMMUT069762.2	100	31	0	0	783	813	1675	1705	3e-08	61.9
XLOC_003102	NONMMUT069762.2	100	31	0	0	681	711	1675	1705	3e-08	61.9
XLOC_003103	NONMMUT032989.2	92.5	40	3	0	1801	1840	2519	2480	6e-06	56
XLOC_003103	NONMMUT013707.2	89.47	95	7	1	4543	4634	1872	1966	1e-20	105
XLOC_003104	NONMMUT049458.2	92.5	40	3	0	11	50	2068	2107	2e-06	56
XLOC_003104	NONMMUT049458.2	92.5	40	3	0	11	50	2068	2107	1e-06	56
XLOC_003107	NONMMUT042675.2	94.12	51	2	1	427	477	3064	3015	1e-10	69.9
XLOC_003119	NONMMUT090750.1	96.43	28	1	0	509	536	655	682	0.0005	48.1
XLOC_003121	NONMMUT055409.2	89.8	49	5	0	96	144	68	20	3e-07	58
XLOC_003121	NONMMUT055409.2	89.8	49	5	0	96	144	68	20	3e-07	58
XLOC_003121	NONMMUT055409.2	89.8	49	5	0	96	144	68	20	5e-07	58
XLOC_003121	NONMMUT055409.2	89.8	49	5	0	96	144	68	20	5e-07	58
XLOC_003123	NONMMUT057333.2	89.66	58	6	0	175	232	10	67	4e-10	67.9
XLOC_003124	NONMMUT102025.1	92.98	57	4	0	3713	3769	2832	2888	2e-13	81.8
XLOC_003124	NONMMUT102025.1	92.98	57	4	0	3713	3769	2832	2888	2e-13	81.8
XLOC_003126	NONMMUT051782.2	86.79	53	3	1	787	835	216	164	0.0005	48.1
XLOC_003130	NONMMUT030858.2	91.89	37	3	0	240	276	1463	1499	0.0001	50.1
XLOC_003130	NONMMUT030858.2	91.89	37	3	0	293	329	1463	1499	0.0002	50.1
XLOC_003130	NONMMUT030858.2	91.89	37	3	0	284	320	1463	1499	0.0002	50.1
XLOC_003132	NONMMUT108146.1	100	23	0	0	212	234	52	74	0.0008	46.1
XLOC_003134	NONMMUT098285.1	97.3	37	1	0	2224	2260	8245	8281	8e-09	65.9
XLOC_003138	NONMMUT072249.2	86.11	72	10	0	515	586	365	436	3e-08	63.9
XLOC_003138	NONMMUT072249.2	86.11	72	10	0	515	586	365	436	3e-08	63.9
XLOC_003138	NONMMUT014693.2	95.45	44	2	0	8673	8716	540	497	4e-10	71.9
XLOC_003139	NONMMUT001798.2	100	34	0	0	246	279	3073	3040	8e-10	67.9
XLOC_003144	NONMMUT098512.1	93.62	47	2	1	13	59	4169	4124	3e-08	61.9
XLOC_003149	NONMMUT097180.1	92.73	55	3	1	546	600	1032	979	2e-10	69.9
XLOC_003150	NONMMUT102618.1	90.03	331	32	1	1092	1422	331	2	8e-106	387
XLOC_003150	NONMMUT102618.1	90.03	331	32	1	1092	1422	331	2	1e-105	387
XLOC_003153	NONMMUT102625.1	96.77	93	3	0	240	332	220	128	2e-38	161
XLOC_003154	NONMMUT109367.1	86.89	61	7	1	851	911	2582	2523	0.0001	50.1
XLOC_003155	NONMMUT102646.1	94.29	35	2	0	435	469	992	958	4e-06	54
XLOC_003156	NONMMUT014466.2	91.49	47	4	0	820	866	246	292	9e-08	61.9
XLOC_003156	NONMMUT014466.2	91.49	47	4	0	820	866	246	292	9e-08	61.9
XLOC_003158	NONMMUT055409.2	100	26	0	0	2490	2515	275	250	9e-05	52
XLOC_003158	NONMMUT055409.2	100	26	0	0	2554	2579	275	250	0.0001	52
XLOC_003159	NONMMUT101620.1	96.05	76	3	0	2200	2275	1	76	2e-27	127
XLOC_003159	NONMMUT101620.1	96.05	76	3	0	2173	2248	1	76	2e-27	127
XLOC_003159	NONMMUT031122.2	100	34	0	0	994	1027	1502	1469	1e-09	67.9
XLOC_003159	NONMMUT031122.2	100	34	0	0	994	1027	1502	1469	2e-09	67.9
XLOC_003159	NONMMUT101620.1	96.05	76	3	0	855	930	1	76	9e-28	127
XLOC_003159	NONMMUT075700.1	92.5	40	3	0	20	59	487	448	3e-06	56
XLOC_003164	NONMMUT091806.1	96.77	31	1	0	527	557	1374	1344	5e-06	54
XLOC_003169	NONMMUT083361.1	95.24	168	8	0	8	175	429	262	4e-71	270
XLOC_003170	NONMMUT070345.2	92.98	57	4	0	844	900	57	1	5e-14	81.8
XLOC_003171	NONMMUT032420.2	92.11	76	6	0	461	536	76	1	7e-21	103
XLOC_003171	NONMMUT032420.2	92.11	76	6	0	461	536	76	1	1e-20	103
XLOC_003172	NONMMUT070345.2	93.88	49	3	0	30	78	67	19	9e-12	73.8
XLOC_003174	NONMMUT083303.1	100	34	0	0	212	245	34	1	2e-10	67.9
XLOC_003175	NONMMUT057406.2	90.7	43	4	0	1291	1333	1228	1270	2e-05	54
XLOC_003175	NONMMUT057406.2	90.7	43	4	0	1291	1333	1228	1270	2e-05	54
XLOC_003175	NONMMUT057406.2	90.7	43	4	0	1291	1333	1228	1270	3e-05	54
XLOC_003175	NONMMUT057406.2	90.7	43	4	0	1291	1333	1228	1270	2e-05	54
XLOC_003175	NONMMUT057406.2	90.7	43	4	0	1291	1333	1228	1270	3e-05	54
XLOC_003175	NONMMUT057406.2	90.7	43	4	0	1291	1333	1228	1270	3e-05	54
XLOC_003175	NONMMUT057406.2	90.7	43	4	0	1291	1333	1228	1270	2e-05	54
XLOC_003175	NONMMUT057406.2	90.7	43	4	0	1291	1333	1228	1270	3e-05	54
XLOC_003182	NONMMUT034977.2	91.67	36	3	0	207	242	983	1018	0.001	48.1
XLOC_003183	NONMMUT069762.2	93.94	33	2	0	920	952	1673	1705	0.0001	50.1
XLOC_003183	NONMMUT069762.2	93.94	33	2	0	652	684	1673	1705	9e-05	50.1
XLOC_003187	NONMMUT057810.2	90	80	4	2	6	82	1181	1103	3e-14	83.8
XLOC_003189	NONMMUT057807.2	94.61	167	9	0	3314	3480	2098	1932	3e-67	260
XLOC_003192	NONMMUT012780.2	91.49	94	8	0	1087	1180	979	1072	2e-26	123
XLOC_003192	NONMMUT012780.2	91.49	94	8	0	1087	1180	979	1072	2e-26	123
XLOC_003192	NONMMUT012780.2	91.49	94	8	0	1087	1180	979	1072	2e-26	123
XLOC_003192	NONMMUT012780.2	91.49	94	8	0	1087	1180	979	1072	2e-26	123
XLOC_003192	NONMMUT114317.1	100	27	0	0	51	77	731	757	8e-06	54
XLOC_003194	NONMMUT037034.2	100	29	0	0	429	457	2352	2324	3e-07	58
XLOC_003195	NONMMUT104744.1	97.3	37	1	0	1683	1719	51	87	4e-09	65.9
XLOC_003206	NONMMUT094828.1	91.11	45	4	0	35	79	1109	1153	1e-07	58
XLOC_003209	NONMMUT104649.1	100	23	0	0	181	203	434	412	0.0005	46.1
XLOC_003211	NONMMUT059570.2	96.88	32	1	0	8	39	821	852	2e-06	56
XLOC_003212	NONMMUT058769.2	87.5	64	8	0	522	585	1567	1504	2e-08	63.9
XLOC_003216	NONMMUT069762.2	100	34	0	0	447	480	1706	1673	7e-10	67.9
XLOC_003216	NONMMUT040289.2	94.12	34	2	0	135	168	1186	1219	4e-05	52
XLOC_003216	NONMMUT040289.2	94.12	34	2	0	135	168	1186	1219	3e-05	52
XLOC_003221	NONMMUT094582.1	96.3	27	1	0	38	64	832	806	0.0007	46.1
XLOC_003222	NONMMUT039064.2	92.59	54	3	1	320	373	1131	1183	1e-09	67.9
XLOC_003222	NONMMUT070345.2	91.04	67	6	0	1996	2062	1	67	6e-15	85.7
XLOC_003229	NONMMUT000631.2	87.98	183	17	2	29	211	317	140	3e-43	178
XLOC_003229	NONMMUT000631.2	87.98	183	17	2	29	211	317	140	3e-43	178
XLOC_003229	NONMMUT000631.2	87.98	183	17	2	29	211	317	140	3e-43	178
XLOC_003234	NONMMUT050660.2	92.68	41	3	0	292	332	3116	3156	2e-07	58
XLOC_003236	NONMMUT071328.2	92.98	57	4	0	104	160	149	93	8e-15	81.8
XLOC_003237	NONMMUT064984.2	91.3	46	4	0	324	369	1492	1537	9e-08	60
XLOC_003245	NONMMUT088062.1	92.45	53	4	0	1102	1154	1813	1865	1e-11	73.8
XLOC_003248	NONMMUT077696.1	93.53	139	9	0	3	141	388	250	2e-51	204
XLOC_003248	NONMMUT077696.1	93.53	139	9	0	3	141	388	250	2e-51	204
XLOC_003249	NONMMUT002115.2	94.87	39	2	0	51	89	1836	1798	2e-08	61.9
XLOC_003249	NONMMUT002115.2	94.87	39	2	0	51	89	1836	1798	1e-08	61.9
XLOC_003249	NONMMUT002115.2	94.87	39	2	0	51	89	1836	1798	1e-08	61.9
XLOC_003252	NONMMUT075505.1	93.94	33	2	0	294	326	638	670	0.0002	50.1
XLOC_003252	NONMMUT077706.1	94.67	150	7	1	1133	1282	150	2	2e-57	226
XLOC_003252	NONMMUT077706.1	95.17	145	6	1	77	221	145	2	1e-57	224
XLOC_003252	NONMMUT077706.1	94.7	151	7	1	75	225	150	1	7e-59	228
XLOC_003254	NONMMUT078764.1	100	24	0	0	375	398	1065	1088	0.0003	48.1
XLOC_003257	NONMMUT070345.2	93.62	47	3	0	462	508	67	21	1e-10	69.9
XLOC_003261	NONMMUT020806.2	97.06	34	1	0	1351	1384	743	710	3e-07	60
XLOC_003261	NONMMUT039735.2	91.04	67	6	0	126	192	312	246	9e-16	85.7
XLOC_003264	NONMMUT039772.2	94.29	35	2	0	898	932	495	461	1e-05	54
XLOC_003266	NONMMUT073198.2	85.48	62	9	0	200	261	427	488	4e-05	52
XLOC_003270	NONMMUT056353.2	86.44	59	8	0	1436	1494	1269	1211	3e-05	54
XLOC_003273	NONMMUT070345.2	88.06	67	8	0	590	656	76	10	2e-10	69.9
XLOC_003276	NONMMUT008416.2	100	23	0	0	300	322	2973	2995	0.001	46.1
XLOC_003276	NONMMUT008416.2	100	23	0	0	180	202	2973	2995	0.0007	46.1
XLOC_003282	NONMMUT134357.1	90.7	43	4	0	425	467	247	205	8e-06	54
XLOC_003283	NONMMUT065286.2	91.89	37	3	0	1188	1224	689	725	0.0005	50.1
XLOC_003286	NONMMUT031834.2	86.6	97	13	0	7	103	1392	1296	7e-17	89.7
XLOC_003287	NONMMUT131181.1	97.14	35	1	0	244	278	4903	4937	1e-08	61.9
XLOC_003291	NONMMUT013778.2	93.33	60	3	1	283	342	870	928	1e-13	79.8
XLOC_003291	NONMMUT013778.2	93.33	60	3	1	283	342	870	928	1e-13	79.8
XLOC_003295	NONMMUT070345.2	100	30	0	0	495	524	50	21	2e-07	60
XLOC_003297	NONMMUT122916.1	97.3	37	1	0	67	103	2907	2871	2e-09	65.9
XLOC_003298	NONMMUT117458.1	100	26	0	0	38	63	218	243	5e-05	52
XLOC_003299	NONMMUT109656.1	93.62	47	2	1	1	47	531	486	2e-08	61.9
XLOC_003300	NONMMUT033116.2	91.89	37	3	0	1272	1308	2925	2889	0.0002	50.1
XLOC_003302	NONMMUT136271.1	91.3	46	3	1	824	869	2139	2095	8e-05	52
XLOC_003307	NONMMUT019762.2	96.43	28	1	0	416	443	39	12	0.0002	48.1
XLOC_003307	NONMMUT126361.1	94.64	56	3	0	466	521	101	156	4e-16	87.7
XLOC_003307	NONMMUT126361.1	94.64	56	3	0	1167	1222	101	156	1e-15	87.7
XLOC_003308	NONMMUT056353.2	88.68	53	6	0	294	346	1273	1221	3e-07	58
XLOC_003312	NONMMUT070345.2	84.93	73	11	0	429	501	76	4	1e-06	58
XLOC_003312	NONMMUT109381.1	93.33	45	2	1	643	687	1946	1989	5e-07	58
XLOC_003313	NONMMUT032692.2	94.87	39	2	0	1097	1135	19	57	3e-07	61.9
XLOC_003319	NONMMUT033534.2	89.47	95	10	0	660	754	2534	2628	1e-22	109
XLOC_003320	NONMMUT105093.1	90.11	91	9	0	2511	2601	181	271	5e-22	109
XLOC_003321	NONMMUT008099.2	100	28	0	0	474	501	2095	2068	1e-06	56
XLOC_003323	NONMMUT066141.2	91.07	56	4	1	611	666	6545	6491	6e-09	63.9
XLOC_003325	NONMMUT109381.1	93.33	45	2	1	1016	1060	1946	1989	9e-07	58
XLOC_003325	NONMMUT025780.2	95	40	2	0	1261	1300	869	908	1e-08	63.9
XLOC_003325	NONMMUT070345.2	89.36	47	5	0	1771	1817	21	67	2e-05	54
XLOC_003325	NONMMUT117672.1	90.48	42	4	0	409	450	2812	2771	2e-05	52
XLOC_003325	NONMMUT109381.1	93.33	45	2	1	1058	1102	1946	1989	9e-07	58
XLOC_003325	NONMMUT109381.1	93.33	45	2	1	937	981	1946	1989	8e-07	58
XLOC_003325	NONMMUT109381.1	93.33	45	2	1	907	951	1946	1989	8e-07	58
XLOC_003325	NONMMUT070345.2	89.36	47	5	0	1458	1504	21	67	2e-05	54
XLOC_003325	NONMMUT109381.1	93.33	45	2	1	1125	1169	1946	1989	9e-07	58
XLOC_003325	NONMMUT070345.2	89.36	47	5	0	1371	1417	21	67	1e-05	54
XLOC_003329	NONMMUT004328.2	89.86	69	7	0	374	442	10	78	5e-14	81.8
XLOC_003332	NONMMUT032692.2	95.12	41	2	0	1233	1273	10	50	3e-09	65.9
XLOC_003332	NONMMUT032692.2	95.12	41	2	0	1999	2039	10	50	5e-09	65.9
XLOC_003334	NONMMUT106091.1	90.91	44	3	1	380	423	1308	1350	0.0005	48.1
XLOC_003334	NONMMUT106091.1	90.91	44	3	1	116	159	1308	1350	0.0003	48.1
XLOC_003345	NONMMUT052900.2	88.33	497	58	0	182	678	4	500	7e-148	525
XLOC_003345	NONMMUT052900.2	88.33	497	58	0	72	568	4	500	2e-147	525
XLOC_003345	NONMMUT052900.2	88.33	497	58	0	70	566	4	500	6e-148	525
XLOC_003345	NONMMUT052900.2	86.3	146	20	0	30	175	713	858	9e-29	131
XLOC_003346	NONMMUT095313.1	86.89	61	7	1	48	108	2042	2101	0.0001	50.1
XLOC_003346	NONMMUT070345.2	89.55	67	7	0	914	980	10	76	8e-13	77.8
XLOC_003353	NONMMUT051192.2	92.68	41	3	0	2283	2323	2675	2715	2e-06	58
XLOC_003353	NONMMUT051192.2	92.68	41	3	0	3493	3533	2675	2715	3e-06	58
XLOC_003353	NONMMUT051192.2	92.68	41	3	0	2731	2771	2675	2715	2e-06	58
XLOC_003353	NONMMUT051192.2	92.68	41	3	0	3070	3110	2675	2715	2e-06	58
XLOC_003359	NONMMUT070345.2	91.23	57	5	0	882	938	1	57	9e-12	73.8
XLOC_003359	NONMMUT070345.2	91.23	57	5	0	677	733	1	57	7e-12	73.8
XLOC_003359	NONMMUT070345.2	91.23	57	5	0	660	716	1	57	7e-12	73.8
XLOC_003360	NONMMUT068926.2	100	24	0	0	838	861	481	504	0.0006	48.1
XLOC_003360	NONMMUT068926.2	100	24	0	0	604	627	481	504	0.0005	48.1
XLOC_003365	NONMMUT135361.1	92.45	53	3	1	1995	2047	12	63	5e-09	65.9
XLOC_003371	NONMMUT101028.1	90	60	6	0	790	849	315	256	6e-11	71.9
XLOC_003373	NONMMUT038827.2	80.95	357	43	4	2502	2854	2822	3157	6e-43	178
XLOC_003375	NONMMUT107579.1	91.67	60	5	0	324	383	121	180	2e-13	79.8
XLOC_003380	NONMMUT038975.2	91.67	36	3	0	62	97	3728	3693	0.0002	48.1
XLOC_003380	NONMMUT038975.2	91.67	36	3	0	61	96	3728	3693	0.0003	48.1
XLOC_003380	NONMMUT038975.2	91.67	36	3	0	61	96	3728	3693	0.0003	48.1
XLOC_003380	NONMMUT038975.2	91.67	36	3	0	56	91	3728	3693	0.0002	48.1
XLOC_003380	NONMMUT038975.2	91.67	36	3	0	51	86	3728	3693	0.0002	48.1
XLOC_003380	NONMMUT038975.2	91.67	36	3	0	49	84	3728	3693	0.0004	48.1
XLOC_003380	NONMMUT038975.2	91.67	36	3	0	49	84	3728	3693	0.0003	48.1
XLOC_003380	NONMMUT038975.2	91.67	36	3	0	30	65	3728	3693	0.0002	48.1
XLOC_003385	NONMMUT059863.2	89.58	48	5	0	1350	1397	9	56	6e-06	56
XLOC_003385	NONMMUT059863.2	89.58	48	5	0	2174	2221	9	56	8e-06	56
XLOC_003385	NONMMUT122511.1	92.16	51	4	0	1554	1604	729	779	4e-10	69.9
XLOC_003386	NONMMUT122916.1	90.32	62	6	0	1089	1150	2847	2908	6e-12	75.8
XLOC_003388	NONMMUT055409.2	91.53	59	5	0	1970	2028	21	79	2e-12	77.8
XLOC_003389	NONMMUT109381.1	93.33	45	2	1	1660	1704	1946	1989	2e-06	58
XLOC_003389	NONMMUT109381.1	93.33	45	2	1	1705	1749	1946	1989	2e-06	58
XLOC_003389	NONMMUT109381.1	93.33	45	2	1	1694	1738	1946	1989	2e-06	58
XLOC_003390	NONMMUT122916.1	96.88	32	1	0	1204	1235	2908	2877	3e-06	56
XLOC_003390	NONMMUT122916.1	96.88	32	1	0	981	1012	2908	2877	2e-06	56
XLOC_003390	NONMMUT122916.1	96.88	32	1	0	858	889	2908	2877	2e-06	56
XLOC_003393	NONMMUT071361.2	100	24	0	0	86	109	542	565	0.0001	48.1
XLOC_003394	NONMMUT056353.2	88.16	76	7	2	1633	1708	1315	1242	2e-08	63.9
XLOC_003397	NONMMUT074373.2	90	70	6	1	918	987	1940	1872	4e-12	75.8
XLOC_003399	NONMMUT136271.1	91.84	49	3	1	1291	1339	1528	1575	9e-07	58
XLOC_003399	NONMMUT136271.1	91.84	49	3	1	1767	1815	1528	1575	1e-06	58
XLOC_003399	NONMMUT136271.1	91.84	49	3	1	1390	1438	1528	1575	9e-07	58
XLOC_003399	NONMMUT136271.1	91.84	49	3	1	1451	1499	1528	1575	1e-06	58
XLOC_003399	NONMMUT136271.1	91.84	49	3	1	1475	1523	1528	1575	1e-06	58
XLOC_003399	NONMMUT136271.1	91.84	49	3	1	1292	1340	1528	1575	9e-07	58
XLOC_003399	NONMMUT136271.1	91.84	49	3	1	1102	1150	1528	1575	8e-07	58
XLOC_003402	NONMMUT043571.2	87.5	64	8	0	47	110	242	305	3e-09	63.9
XLOC_003407	NONMMUT069649.2	97.5	40	1	0	277	316	191	152	5e-11	71.9
XLOC_003411	NONMMUT072833.2	97.5	40	0	1	383	422	2796	2758	5e-09	63.9
XLOC_003411	NONMMUT072833.2	97.5	40	0	1	403	442	2796	2758	5e-09	63.9
XLOC_003412	NONMMUT011949.2	96.88	32	1	0	200	231	78	47	1e-06	56
XLOC_003429	NONMMUT089499.1	92.86	56	3	1	1474	1529	157	103	7e-11	71.9
XLOC_003439	NONMMUT091109.1	92.45	53	4	0	82	134	944	996	4e-11	73.8
XLOC_003439	NONMMUT091109.1	92.45	53	4	0	64	116	944	996	4e-11	73.8
XLOC_003440	NONMMUT135361.1	95	40	2	0	34	73	50	11	1e-08	63.9
XLOC_003444	NONMMUT070345.2	94.74	38	2	0	853	890	19	56	2e-07	60
XLOC_003449	NONMMUT032692.2	92	50	4	0	885	934	19	68	1e-09	67.9
XLOC_003449	NONMMUT032692.2	92	50	4	0	353	402	19	68	9e-10	67.9
XLOC_003449	NONMMUT014473.2	100	25	0	0	1284	1308	1850	1874	0.0004	50.1
XLOC_003449	NONMMUT032692.2	92	50	4	0	372	421	19	68	1e-09	67.9
XLOC_003449	NONMMUT032692.2	92	50	4	0	485	534	19	68	1e-09	67.9
XLOC_003451	NONMMUT068513.2	85.71	63	9	0	1298	1360	2120	2058	2e-05	54
XLOC_003451	NONMMUT068513.2	85.71	63	9	0	1190	1252	2120	2058	1e-05	54
XLOC_003455	NONMMUT090569.1	91.89	37	3	0	293	329	895	859	9e-05	50.1
XLOC_003455	NONMMUT090569.1	91.89	37	3	0	290	326	895	859	9e-05	50.1
XLOC_003455	NONMMUT090569.1	91.89	37	3	0	221	257	895	859	8e-05	50.1
XLOC_003457	NONMMUT095531.1	96.3	27	1	0	189	215	4113	4139	0.0008	46.1
XLOC_003461	NONMMUT079092.1	89.29	56	6	0	713	768	613	668	1e-08	63.9
XLOC_003461	NONMMUT079092.1	89.29	56	6	0	588	643	613	668	9e-09	63.9
XLOC_003461	NONMMUT079092.1	89.29	56	6	0	524	579	613	668	8e-09	63.9
XLOC_003461	NONMMUT079092.1	89.29	56	6	0	546	601	613	668	8e-09	63.9
XLOC_003461	NONMMUT079092.1	89.29	56	6	0	527	582	613	668	8e-09	63.9
XLOC_003461	NONMMUT079092.1	89.29	56	6	0	432	487	613	668	7e-09	63.9
XLOC_003461	NONMMUT079092.1	89.29	56	6	0	372	427	613	668	7e-09	63.9
XLOC_003466	NONMMUT104319.1	90	60	5	1	847	906	2446	2388	8e-09	63.9
XLOC_003469	NONMMUT134218.1	92.96	71	5	0	373	443	2531	2601	8e-20	101
XLOC_003469	NONMMUT134218.1	92.96	71	5	0	346	416	2531	2601	8e-20	101
XLOC_003469	NONMMUT134218.1	92.96	71	5	0	123	193	2531	2601	7e-20	101
XLOC_003469	NONMMUT134218.1	92.96	71	5	0	180	250	2531	2601	7e-20	101
XLOC_003469	NONMMUT134218.1	92.96	71	5	0	129	199	2531	2601	7e-20	101
XLOC_003470	NONMMUT068801.2	100	24	0	0	321	344	1045	1068	0.0003	48.1
XLOC_003470	NONMMUT064753.2	100	25	0	0	996	1020	1224	1200	0.0001	50.1
XLOC_003470	NONMMUT121578.1	94.44	36	2	0	605	640	660	695	3e-06	56
XLOC_003470	NONMMUT064753.2	100	25	0	0	597	621	1224	1200	9e-05	50.1
XLOC_003472	NONMMUT127551.1	94.12	34	2	0	123	156	1152	1119	1e-05	52
XLOC_003473	NONMMUT015947.2	94.87	39	2	0	1263	1301	227	265	7e-08	61.9
XLOC_003475	NONMMUT057018.2	92.59	54	3	1	1481	1534	1720	1772	2e-09	67.9
XLOC_003475	NONMMUT107279.1	91.07	56	4	1	1195	1250	96	42	1e-08	63.9
XLOC_003476	NONMMUT070345.2	93.88	49	3	0	1138	1186	19	67	1e-11	73.8
XLOC_003478	NONMMUT132437.1	91.21	91	8	0	407	497	932	842	2e-24	117
XLOC_003478	NONMMUT132437.1	91.21	91	8	0	192	282	932	842	9e-25	117
XLOC_003478	NONMMUT132437.1	91.21	91	8	0	121	211	932	842	8e-25	117
XLOC_003478	NONMMUT132437.1	88.42	95	11	0	264	358	621	527	4e-20	101
XLOC_003486	NONMMUT060622.2	91.89	37	3	0	516	552	2264	2228	8e-05	50.1
XLOC_003487	NONMMUT096600.1	94.74	38	2	0	426	463	211	248	1e-07	60
XLOC_003489	NONMMUT126708.1	97.14	35	1	0	956	990	60	94	4e-08	61.9
XLOC_003490	NONMMUT076396.1	87.59	145	18	0	1416	1560	212	356	6e-33	145
XLOC_003490	NONMMUT042675.2	90.38	52	4	1	377	428	3011	3061	1e-06	56
XLOC_003501	NONMMUT068466.2	92.86	56	4	0	35	90	202	257	4e-14	79.8
XLOC_003507	NONMMUT098512.1	93.88	49	2	1	228	276	4120	4167	3e-09	65.9
XLOC_003516	NONMMUT053358.2	94.59	37	2	0	493	529	2068	2104	1e-06	58
XLOC_003516	NONMMUT053358.2	94.59	37	2	0	99	135	2068	2104	4e-07	58
XLOC_003519	NONMMUT014466.2	90.48	42	4	0	1648	1689	297	256	6e-05	52
XLOC_003527	NONMMUT064283.2	87.25	102	12	1	242	342	1018	917	1e-16	91.7
XLOC_003528	NONMMUT126369.1	88.37	43	5	0	44	86	2520	2562	0.0006	46.1
XLOC_003532	NONMMUT127661.1	94.12	34	2	0	243	276	805	772	1e-05	52
XLOC_003534	NONMMUT136555.1	96.67	30	1	0	428	457	828	857	2e-05	52
XLOC_003535	NONMMUT034568.2	100	23	0	0	7	29	875	853	0.001	46.1
XLOC_003537	NONMMUT005604.2	96.43	28	1	0	140	167	467	440	0.0003	48.1
XLOC_003543	NONMMUT135361.1	92.31	39	3	0	11	49	50	12	4e-06	54
XLOC_003544	NONMMUT070345.2	89.29	56	6	0	425	480	56	1	1e-08	63.9
XLOC_003547	NONMMUT032692.2	93.75	48	3	0	1599	1646	57	10	7e-11	71.9
XLOC_003550	NONMMUT014466.2	93.48	46	3	0	108	153	246	291	8e-10	67.9
XLOC_003550	NONMMUT014466.2	93.48	46	3	0	108	153	246	291	7e-10	67.9
XLOC_003550	NONMMUT014466.2	93.48	46	3	0	108	153	246	291	6e-10	67.9
XLOC_003550	NONMMUT014466.2	93.48	46	3	0	108	153	246	291	7e-10	67.9
XLOC_003550	NONMMUT014466.2	93.48	46	3	0	108	153	246	291	1e-09	67.9
XLOC_003552	NONMMUT016590.2	98.8	83	1	0	146	228	766	684	4e-37	157
XLOC_003555	NONMMUT105820.1	85.07	134	17	3	1315	1448	732	602	1e-14	83.8
XLOC_003555	NONMMUT033630.2	89.13	92	9	1	1637	1727	560	469	6e-18	95.6
XLOC_003555	NONMMUT033634.2	84.72	144	19	3	1315	1458	1014	874	1e-15	87.7
XLOC_003555	NONMMUT033634.2	84.72	144	19	3	1315	1458	1014	874	1e-15	87.7
XLOC_003555	NONMMUT033634.2	84.72	144	19	3	1315	1458	1014	874	1e-15	87.7
XLOC_003555	NONMMUT033634.2	84.72	144	19	3	1315	1458	1014	874	1e-15	87.7
XLOC_003555	NONMMUT033630.2	89.13	92	9	1	1637	1727	560	469	6e-18	95.6
XLOC_003555	NONMMUT033630.2	89.13	92	9	1	1718	1808	560	469	7e-18	95.6
XLOC_003556	NONMMUT045672.2	97.3	37	1	0	754	790	1009	973	4e-09	65.9
XLOC_003559	NONMMUT002115.2	90.32	62	5	1	1800	1861	1858	1798	1e-09	67.9
XLOC_003559	NONMMUT002115.2	90.32	62	5	1	1800	1861	1858	1798	1e-09	67.9
XLOC_003559	NONMMUT002115.2	90.32	62	5	1	1800	1861	1858	1798	1e-09	67.9
XLOC_003559	NONMMUT002115.2	90.32	62	5	1	1800	1861	1858	1798	2e-09	67.9
XLOC_003568	NONMMUT089699.1	91.43	35	3	0	260	294	2507	2541	0.0009	46.1
XLOC_003569	NONMMUT018939.2	100	23	0	0	6	28	6265	6287	0.0007	46.1
XLOC_003573	NONMMUT008416.2	100	26	0	0	737	762	2957	2982	4e-05	52
XLOC_003576	NONMMUT114317.1	100	25	0	0	268	292	731	755	7e-05	50.1
XLOC_003578	NONMMUT070345.2	89.58	48	5	0	185	232	67	20	4e-06	56
XLOC_003579	NONMMUT038442.2	93.48	184	10	2	41	224	596	777	5e-66	254
XLOC_003579	NONMMUT038442.2	93.48	184	10	2	41	224	596	777	6e-66	254
XLOC_003579	NONMMUT098512.1	92.98	57	3	1	521	577	4169	4114	2e-11	73.8
XLOC_003580	NONMMUT111185.1	100	25	0	0	427	451	577	601	0.0003	50.1
XLOC_003585	NONMMUT060806.2	96.43	28	1	0	28	55	341	314	0.0005	48.1
XLOC_003585	NONMMUT060806.2	96.43	28	1	0	28	55	341	314	0.0003	48.1
XLOC_003585	NONMMUT122916.1	94.44	36	2	0	775	810	2873	2908	2e-06	56
XLOC_003586	NONMMUT038516.2	100	34	0	0	299	332	151	118	3e-10	67.9
XLOC_003587	NONMMUT131181.1	100	29	0	0	782	810	1549	1521	5e-07	58
XLOC_003593	NONMMUT075574.1	96.55	29	1	0	763	791	5735	5763	0.0001	50.1
XLOC_003594	NONMMUT110495.1	100	24	0	0	35	58	1333	1356	0.0002	48.1
XLOC_003595	NONMMUT066410.2	93.75	48	2	1	683	730	718	764	7e-09	63.9
XLOC_003598	NONMMUT038810.2	91.88	308	23	1	779	1086	4389	4084	3e-111	406
XLOC_003598	NONMMUT038810.2	91.88	308	23	1	779	1086	4389	4084	3e-111	406
XLOC_003598	NONMMUT038810.2	91.88	308	23	1	779	1086	4389	4084	3e-111	406
XLOC_003598	NONMMUT038810.2	91.88	308	23	1	779	1086	4389	4084	3e-111	406
XLOC_003598	NONMMUT038810.2	91.88	308	23	1	779	1086	4389	4084	3e-111	406
XLOC_003599	NONMMUT100806.1	100	25	0	0	2346	2370	531	555	0.0006	50.1
XLOC_003599	NONMMUT044109.2	95.12	41	2	0	1388	1428	85	45	5e-09	65.9
XLOC_003602	NONMMUT038894.2	82.71	266	46	0	68	333	307	572	8e-39	163
XLOC_003603	NONMMUT038894.2	82.57	109	19	0	383	491	1149	1257	1e-09	65.9
XLOC_003605	NONMMUT038965.2	93.1	145	10	0	83	227	858	714	2e-52	208
XLOC_003605	NONMMUT038965.2	93.1	145	10	0	83	227	858	714	2e-52	208
XLOC_003606	NONMMUT069762.2	100	30	0	0	1386	1415	1677	1706	2e-07	60
XLOC_003609	NONMMUT122916.1	87.3	63	8	0	1552	1614	2846	2908	9e-08	61.9
XLOC_003610	NONMMUT034642.2	96.43	28	1	0	1519	1546	452	425	0.001	48.1
XLOC_003617	NONMMUT125153.1	88.61	158	14	1	107	264	404	251	6e-41	168
XLOC_003618	NONMMUT122670.1	92.11	38	3	0	10	47	1505	1468	2e-05	52
XLOC_003618	NONMMUT122670.1	92.11	38	3	0	10	47	1505	1468	2e-05	52
XLOC_003618	NONMMUT122670.1	92.11	38	3	0	10	47	1505	1468	2e-05	52
XLOC_003621	NONMMUT074763.2	88.71	62	6	1	381	442	1780	1720	1e-07	60
XLOC_003622	NONMMUT062841.2	96.43	28	1	0	72	99	1529	1556	0.0002	48.1
XLOC_003622	NONMMUT073099.2	93.33	45	3	0	503	547	2	46	1e-09	65.9
XLOC_003632	NONMMUT063184.2	91.91	272	20	1	155	426	270	1	5e-98	359
XLOC_003632	NONMMUT063184.2	91.91	272	20	1	151	422	270	1	5e-98	359
XLOC_003632	NONMMUT063184.2	91.91	272	20	1	33	304	270	1	4e-98	359
XLOC_003634	NONMMUT134020.1	100	24	0	0	81	104	539	516	0.0002	48.1
XLOC_003634	NONMMUT134020.1	100	24	0	0	81	104	539	516	0.0002	48.1
XLOC_003634	NONMMUT134020.1	100	24	0	0	81	104	539	516	0.0003	48.1
XLOC_003635	NONMMUT063147.2	89.89	89	9	0	124	212	2567	2655	1e-21	105
XLOC_003642	NONMMUT104744.1	94.59	37	2	0	1195	1231	51	87	1e-06	58
XLOC_003644	NONMMUT121578.1	97.44	39	1	0	105	143	660	698	1e-10	69.9
XLOC_003645	NONMMUT062960.2	93.33	90	6	0	93	182	880	791	1e-28	131
XLOC_003645	NONMMUT062960.2	93.33	90	6	0	93	182	880	791	1e-28	131
XLOC_003646	NONMMUT098512.1	94.74	38	2	0	76	113	4151	4114	7e-08	60
XLOC_003648	NONMMUT130518.1	96.55	29	1	0	21	49	291	263	6e-05	50.1
XLOC_003650	NONMMUT062909.2	84.7	268	29	1	440	695	757	490	5e-56	220
XLOC_003659	NONMMUT065566.2	81.37	102	19	0	729	830	1156	1257	6e-05	52
XLOC_003659	NONMMUT065566.2	81.37	102	19	0	946	1047	1156	1257	7e-05	52
XLOC_003659	NONMMUT065566.2	81.37	102	19	0	1071	1172	1156	1257	8e-05	52
XLOC_003659	NONMMUT065566.2	81.37	102	19	0	505	606	1156	1257	6e-05	52
XLOC_003662	NONMMUT056556.2	100	26	0	0	822	847	174	199	5e-05	52
XLOC_003664	NONMMUT125797.1	91.43	35	3	0	257	291	298	264	0.0008	46.1
XLOC_003672	NONMMUT135361.1	97.44	39	1	0	753	791	50	12	5e-10	69.9
XLOC_003673	NONMMUT062680.2	88.64	493	35	9	502	988	566	89	1e-125	452
XLOC_003673	NONMMUT062680.2	88.3	581	47	9	454	1028	566	1	1e-149	531
XLOC_003674	NONMMUT125573.1	93.94	33	2	0	324	356	217	185	8e-05	50.1
XLOC_003674	NONMMUT014466.2	90.48	42	4	0	110	151	256	297	5e-05	52
XLOC_003674	NONMMUT125573.1	93.94	33	2	0	82	114	217	185	4e-05	50.1
XLOC_003674	NONMMUT125573.1	93.94	33	2	0	522	554	217	185	0.0001	50.1
XLOC_003678	NONMMUT055258.2	86.57	67	8	1	419	485	80	15	6e-06	54
XLOC_003683	NONMMUT032692.2	89.8	49	5	0	196	244	68	20	1e-06	58
XLOC_003689	NONMMUT136269.1	92.31	52	3	1	597	648	1337	1287	2e-08	63.9
XLOC_003689	NONMMUT136269.1	92.31	52	3	1	597	648	1337	1287	2e-08	63.9
XLOC_003697	NONMMUT134445.1	100	26	0	0	111	136	827	802	7e-05	52
XLOC_003705	NONMMUT132533.1	89.18	194	21	0	133	326	494	301	8e-56	218
XLOC_003705	NONMMUT132533.1	85.85	106	15	0	133	238	326	221	1e-17	91.7
XLOC_003713	NONMMUT132500.1	93.02	86	6	0	525	610	232	147	7e-27	123
XLOC_003713	NONMMUT068968.2	91.94	62	3	1	467	526	129	68	6e-13	77.8
XLOC_003713	NONMMUT068890.2	94.29	35	2	0	870	904	4319	4353	8e-06	54
XLOC_003713	NONMMUT132500.1	93.02	86	6	0	1182	1267	232	147	1e-26	123
XLOC_003713	NONMMUT132500.1	93.02	86	6	0	1302	1387	232	147	2e-26	123
XLOC_003713	NONMMUT132498.1	95.9	122	5	0	1546	1667	170	49	3e-50	202
XLOC_003713	NONMMUT132500.1	93.02	86	6	0	1827	1912	232	147	2e-26	123
XLOC_003713	NONMMUT132500.1	93.02	86	6	0	1669	1754	232	147	2e-26	123
XLOC_003713	NONMMUT068968.2	91.8	61	3	1	1194	1252	128	68	4e-12	75.8
XLOC_003713	NONMMUT132499.1	95.35	43	2	0	43	85	171	129	4e-11	69.9
XLOC_003718	NONMMUT086933.1	92.16	51	3	1	322	372	851	802	1e-08	61.9
XLOC_003723	NONMMUT068855.2	92.82	195	14	0	454	648	714	908	1e-72	276
XLOC_003725	NONMMUT055409.2	95.45	44	2	0	1109	1152	22	65	6e-11	71.9
XLOC_003725	NONMMUT055409.2	95.45	44	2	0	1109	1152	22	65	8e-11	71.9
XLOC_003725	NONMMUT122916.1	95	40	2	0	1409	1448	2871	2910	2e-08	63.9
XLOC_003732	NONMMUT132397.1	88.68	106	12	0	219	324	108	3	1e-24	115
XLOC_003734	NONMMUT122916.1	97.3	37	1	0	257	293	2908	2872	7e-10	65.9
XLOC_003735	NONMMUT100516.1	80.73	109	21	0	141	249	5125	5017	0.0002	50.1
XLOC_003736	NONMMUT040289.2	95.24	42	2	0	574	615	1186	1227	6e-10	67.9
XLOC_003738	NONMMUT048823.2	90.2	51	4	1	792	842	119	168	2e-05	54
XLOC_003745	NONMMUT002115.2	92.31	52	3	1	1978	2029	1808	1858	2e-08	63.9
XLOC_003747	NONMMUT134083.1	97.56	82	2	0	155	236	4213	4294	2e-34	147
XLOC_003748	NONMMUT068541.2	82.96	405	44	8	165	549	428	29	6e-58	226
XLOC_003748	NONMMUT068541.2	82.89	409	45	8	664	1052	432	29	1e-57	226
XLOC_003748	NONMMUT068541.2	82.89	409	45	8	664	1052	432	29	1e-57	226
XLOC_003748	NONMMUT068541.2	82.89	409	45	8	664	1052	432	29	1e-57	226
XLOC_003748	NONMMUT068541.2	82.96	405	44	8	306	690	428	29	9e-58	226
XLOC_003748	NONMMUT068541.2	82.88	403	44	8	167	549	426	29	1e-56	222
XLOC_003748	NONMMUT068541.2	83.03	442	49	9	242	663	464	29	4e-63	244
XLOC_003748	NONMMUT068541.2	82.88	403	44	8	37	419	426	29	1e-56	222
XLOC_003748	NONMMUT068541.2	82.88	403	44	8	37	419	426	29	9e-57	222
XLOC_003748	NONMMUT068541.2	83.03	442	49	9	865	1286	464	29	7e-63	244
XLOC_003748	NONMMUT068541.2	83.03	442	49	9	865	1286	464	29	7e-63	244
XLOC_003752	NONMMUT125574.1	100	25	0	0	106	130	1831	1807	0.0002	50.1
XLOC_003753	NONMMUT064781.2	100	24	0	0	647	670	293	316	0.0004	48.1
XLOC_003757	NONMMUT121578.1	97.14	35	1	0	2531	2565	664	698	1e-07	61.9
XLOC_003758	NONMMUT132229.1	89.62	106	11	0	536	641	777	672	7e-27	123
XLOC_003763	NONMMUT068430.2	92.65	68	5	0	531	598	302	235	2e-18	95.6
XLOC_003763	NONMMUT068430.2	92.42	66	5	0	102	167	300	235	2e-17	91.7
XLOC_003763	NONMMUT068430.2	92.42	66	5	0	102	167	300	235	3e-17	91.7
XLOC_003763	NONMMUT068430.2	92.42	66	5	0	102	167	300	235	3e-17	91.7
XLOC_003768	NONMMUT032692.2	91.23	57	5	0	5650	5706	73	17	1e-10	73.8
XLOC_003768	NONMMUT032692.2	91.23	57	5	0	1310	1366	73	17	5e-11	73.8
XLOC_003774	NONMMUT070345.2	89.55	67	7	0	452	518	67	1	8e-13	77.8
XLOC_003774	NONMMUT070345.2	89.55	67	7	0	384	450	67	1	6e-13	77.8
XLOC_003779	NONMMUT036290.2	88.63	422	48	0	178	599	527	948	1e-126	456
XLOC_003779	NONMMUT036290.2	88.86	431	48	0	463	893	527	957	8e-132	474
XLOC_003779	NONMMUT036290.2	88.86	431	48	0	672	1102	527	957	8e-132	474
XLOC_003781	NONMMUT135361.1	92.31	65	4	1	151	215	71	8	2e-14	81.8
XLOC_003783	NONMMUT134532.1	93.22	59	3	1	542	600	883	826	7e-13	77.8
XLOC_003783	NONMMUT134532.1	93.22	59	3	1	655	713	883	826	8e-13	77.8
XLOC_003791	NONMMUT071745.2	93.94	33	2	0	566	598	109	77	8e-05	50.1
XLOC_003795	NONMMUT087408.1	100	25	0	0	698	722	851	875	0.0001	50.1
XLOC_003798	NONMMUT004735.2	100	23	0	0	239	261	530	508	0.0009	46.1
XLOC_003801	NONMMUT096553.1	94.74	38	2	0	1702	1739	408	371	3e-07	60
XLOC_003801	NONMMUT096553.1	94.74	38	2	0	1705	1742	408	371	3e-07	60
XLOC_003801	NONMMUT096553.1	94.74	38	2	0	1303	1340	408	371	2e-07	60
XLOC_003801	NONMMUT096553.1	94.74	38	2	0	1692	1729	408	371	3e-07	60
XLOC_003801	NONMMUT096553.1	94.74	38	2	0	1207	1244	408	371	2e-07	60
XLOC_003802	NONMMUT070345.2	97.37	38	1	0	1335	1372	20	57	1e-09	67.9
XLOC_003805	NONMMUT108995.1	90.74	108	9	1	48	155	99	205	3e-28	127
XLOC_003808	NONMMUT036927.2	98.16	869	10	2	66	934	677	1539	0	1588
XLOC_003810	NONMMUT106641.1	96.43	28	1	0	79	106	248	221	0.0003	48.1
XLOC_003813	NONMMUT034977.2	93.18	44	3	0	243	286	983	1026	3e-08	63.9
XLOC_003814	NONMMUT116819.1	87.76	147	17	1	261	406	1412	1558	2e-32	141
XLOC_003815	NONMMUT098279.1	100	23	0	0	173	195	30	8	0.0006	46.1
XLOC_003816	NONMMUT110802.1	96.3	27	1	0	217	243	3479	3453	0.0009	46.1
XLOC_003819	NONMMUT016115.2	82.12	151	27	0	1535	1685	183	33	1e-14	85.7
XLOC_003819	NONMMUT016115.2	82.12	151	27	0	1429	1579	183	33	1e-14	85.7
XLOC_003819	NONMMUT016115.2	82.12	151	27	0	1322	1472	183	33	1e-14	85.7
XLOC_003819	NONMMUT016115.2	82.12	151	27	0	1325	1475	183	33	1e-14	85.7
XLOC_003819	NONMMUT016115.2	82.12	151	27	0	1251	1401	183	33	1e-14	85.7
XLOC_003819	NONMMUT016115.2	82.12	151	27	0	1112	1262	183	33	1e-14	85.7
XLOC_003820	NONMMUT047556.2	86.15	65	9	0	105	169	113	177	8e-07	58
XLOC_003820	NONMMUT047556.2	86.15	65	9	0	105	169	113	177	3e-07	58
XLOC_003820	NONMMUT047556.2	86.15	65	9	0	67	131	113	177	7e-07	58
XLOC_003820	NONMMUT047556.2	86.15	65	9	0	372	436	113	177	6e-07	58
XLOC_003820	NONMMUT047556.2	86.15	65	9	0	103	167	113	177	3e-07	58
XLOC_003822	NONMMUT094828.1	96.97	33	1	0	418	450	1121	1153	6e-07	58
XLOC_003828	NONMMUT074114.2	86	100	14	0	266	365	1	100	2e-16	87.7
XLOC_003829	NONMMUT047399.2	85.28	299	36	2	4531	4821	2021	2319	4e-61	240
XLOC_003829	NONMMUT047399.2	85.28	299	36	2	2410	2700	2021	2319	2e-61	240
XLOC_003831	NONMMUT102459.1	100	24	0	0	323	346	1724	1701	0.0004	48.1
XLOC_003831	NONMMUT102459.1	100	24	0	0	332	355	1724	1701	0.0004	48.1
XLOC_003835	NONMMUT032692.2	92.11	38	3	0	1366	1403	20	57	5e-05	52
XLOC_003837	NONMMUT116670.1	100	42	0	0	1	42	1174	1215	1e-14	83.8
XLOC_003843	NONMMUT047118.2	83.33	72	12	0	377	448	1	72	0.0003	48.1
XLOC_003843	NONMMUT047118.2	83.33	72	12	0	360	431	1	72	0.0003	48.1
XLOC_003845	NONMMUT056845.2	96.3	27	1	0	119	145	170	144	0.0007	46.1
XLOC_003846	NONMMUT070345.2	91.38	58	5	0	556	613	10	67	4e-12	75.8
XLOC_003848	NONMMUT067179.2	86.57	67	9	0	501	567	1	67	3e-08	61.9
XLOC_003849	NONMMUT102445.1	93.75	48	2	1	994	1041	1259	1305	4e-08	63.9
XLOC_003850	NONMMUT103281.1	92.11	38	3	0	749	786	279	242	5e-05	52
XLOC_003856	NONMMUT046713.2	82.22	433	42	8	6406	6834	3564	3965	2e-60	238
XLOC_003869	NONMMUT130865.1	100	25	0	0	231	255	69	93	0.0001	50.1
XLOC_003872	NONMMUT047888.2	90	50	5	0	438	487	2593	2642	2e-07	60
XLOC_003873	NONMMUT134386.1	87.69	65	7	1	1095	1159	1652	1589	7e-07	58
XLOC_003873	NONMMUT134386.1	87.69	65	7	1	816	880	1652	1589	6e-07	58
XLOC_003876	NONMMUT070345.2	91.49	47	4	0	1813	1859	10	56	2e-07	61.9
XLOC_003877	NONMMUT055409.2	89.8	49	5	0	1255	1303	19	67	1e-06	58
XLOC_003878	NONMMUT135982.1	93.94	33	2	0	693	725	4218	4186	0.0004	50.1
XLOC_003878	NONMMUT135982.1	93.94	33	2	0	238	270	4218	4186	5e-05	50.1
XLOC_003878	NONMMUT135982.1	93.94	33	2	0	236	268	4218	4186	4e-05	50.1
XLOC_003882	NONMMUT064447.2	100	25	0	0	287	311	449	473	8e-05	50.1
XLOC_003887	NONMMUT014695.2	87.76	49	6	0	1713	1761	1708	1756	0.0004	50.1
XLOC_003887	NONMMUT014695.2	87.76	49	6	0	938	986	1708	1756	0.0003	50.1
XLOC_003887	NONMMUT014695.2	87.76	49	6	0	596	644	1708	1756	0.0002	50.1
XLOC_003891	NONMMUT068513.2	92.31	39	3	0	1098	1136	2122	2084	1e-05	54
XLOC_003891	NONMMUT068513.2	92.31	39	3	0	965	1003	2122	2084	9e-06	54
XLOC_003891	NONMMUT068513.2	92.31	39	3	0	1561	1599	2122	2084	1e-05	54
XLOC_003891	NONMMUT068513.2	92.31	39	3	0	1104	1142	2122	2084	1e-05	54
XLOC_003899	NONMMUT056729.2	86.67	60	8	0	168	227	1670	1611	2e-06	56
XLOC_003911	NONMMUT030751.2	100	24	0	0	316	339	639	616	0.0002	48.1
XLOC_003915	NONMMUT092509.1	90.91	55	4	1	500	554	135	188	5e-08	61.9
XLOC_003918	NONMMUT034916.2	92.5	40	3	0	861	900	1321	1282	2e-06	56
XLOC_003918	NONMMUT034916.2	92.5	40	3	0	906	945	1321	1282	2e-06	56
XLOC_003925	NONMMUT028199.2	87.27	55	7	0	1402	1456	1201	1255	1e-05	54
XLOC_003927	NONMMUT129706.1	100	24	0	0	91	114	837	814	0.0009	48.1
XLOC_003927	NONMMUT129706.1	100	24	0	0	86	109	837	814	0.0009	48.1
XLOC_003927	NONMMUT129706.1	100	24	0	0	59	82	837	814	0.001	48.1
XLOC_003927	NONMMUT129706.1	100	24	0	0	59	82	837	814	0.0009	48.1
XLOC_003927	NONMMUT132715.1	92.16	51	3	1	90	140	1314	1363	6e-08	61.9
XLOC_003928	NONMMUT056353.2	88.68	53	6	0	99	151	1277	1225	3e-07	58
XLOC_003932	NONMMUT091874.1	89.36	47	5	0	137	183	324	278	6e-06	54
XLOC_003933	NONMMUT091854.1	94.29	35	2	0	1988	2022	244	210	2e-05	54
XLOC_003939	NONMMUT108879.1	96.3	27	1	0	129	155	205	231	0.0006	46.1
XLOC_003941	NONMMUT036417.2	87.02	262	34	0	1088	1349	1123	862	2e-64	250
XLOC_003942	NONMMUT070345.2	87.88	66	8	0	94	159	76	11	5e-10	67.9
XLOC_003942	NONMMUT070345.2	87.88	66	8	0	94	159	76	11	6e-10	67.9
XLOC_003942	NONMMUT114317.1	100	27	0	0	43	69	757	731	3e-06	54
XLOC_003943	NONMMUT032420.2	89.47	57	6	0	116	172	57	1	5e-09	65.9
XLOC_003943	NONMMUT032420.2	89.47	57	6	0	116	172	57	1	4e-09	65.9
XLOC_003945	NONMMUT129999.1	92.68	41	3	0	175	215	104	144	4e-07	58
XLOC_003945	NONMMUT129999.1	92.68	41	3	0	175	215	104	144	3e-07	58
XLOC_003945	NONMMUT129999.1	92.68	41	3	0	175	215	104	144	5e-07	58
XLOC_003951	NONMMUT025771.2	100	24	0	0	12	35	2854	2831	0.0003	48.1
XLOC_003951	NONMMUT025771.2	100	24	0	0	12	35	2854	2831	0.0002	48.1
XLOC_003953	NONMMUT087360.1	90.57	53	5	0	1272	1324	539	591	3e-09	65.9
XLOC_003955	NONMMUT124020.1	90.2	51	5	0	918	968	3339	3289	9e-08	61.9
XLOC_003957	NONMMUT062482.2	81.59	554	82	12	3015	3566	134	669	3e-52	210
XLOC_003961	NONMMUT045672.2	91.38	58	4	1	986	1043	1026	970	3e-09	67.9
XLOC_003961	NONMMUT045672.2	91.38	58	4	1	986	1043	1026	970	4e-09	67.9
XLOC_003961	NONMMUT045672.2	91.38	58	4	1	986	1043	1026	970	3e-09	67.9
XLOC_003963	NONMMUT110295.1	100	27	0	0	757	783	241	267	1e-05	54
XLOC_003963	NONMMUT110295.1	100	27	0	0	757	783	241	267	1e-05	54
XLOC_003963	NONMMUT110295.1	100	27	0	0	757	783	241	267	1e-05	54
XLOC_003969	NONMMUT121578.1	92	50	4	0	11	60	709	660	3e-10	67.9
XLOC_003972	NONMMUT047517.2	92.17	115	4	3	34	144	492	379	3e-30	137
XLOC_003976	NONMMUT047306.2	85.56	457	61	4	1182	1636	595	142	2e-95	353
XLOC_003982	NONMMUT020806.2	96.97	33	1	0	485	517	743	711	2e-06	58
XLOC_003985	NONMMUT054322.2	96.67	30	1	0	795	824	1736	1707	7e-05	52
XLOC_003987	NONMMUT047465.2	83.64	214	34	1	45	258	238	26	5e-32	139
XLOC_003989	NONMMUT009657.2	97.06	34	1	0	681	714	2130	2163	6e-07	60
XLOC_003992	NONMMUT109656.1	100	28	0	0	2185	2212	488	515	5e-06	56
XLOC_003992	NONMMUT109656.1	100	28	0	0	2177	2204	488	515	5e-06	56
XLOC_003992	NONMMUT109656.1	100	28	0	0	2208	2235	488	515	5e-06	56
XLOC_003992	NONMMUT109656.1	100	28	0	0	2182	2209	488	515	5e-06	56
XLOC_003992	NONMMUT131734.1	92.98	57	3	1	625	681	12958	13013	2e-11	73.8
XLOC_003992	NONMMUT131734.1	92.98	57	3	1	625	681	12958	13013	2e-11	73.8
XLOC_003992	NONMMUT131734.1	92.98	57	3	1	625	681	12958	13013	2e-11	73.8
XLOC_003992	NONMMUT131734.1	92.98	57	3	1	625	681	12958	13013	2e-11	73.8
XLOC_003992	NONMMUT131734.1	92.98	57	3	1	625	681	12958	13013	2e-11	73.8
XLOC_003992	NONMMUT131734.1	92.98	57	3	1	625	681	12958	13013	2e-11	73.8
XLOC_003992	NONMMUT131734.1	92.98	57	3	1	625	681	12958	13013	2e-11	73.8
XLOC_004005	NONMMUT047503.2	89.06	64	7	0	400	463	164	227	2e-11	71.9
XLOC_004007	NONMMUT047968.2	90.91	99	9	0	21	119	3238	3336	6e-28	125
XLOC_004008	NONMMUT065758.2	89.23	130	14	0	59	188	1211	1340	5e-34	147
XLOC_004009	NONMMUT047875.2	88.03	142	14	3	437	576	141	1	8e-27	123
XLOC_004009	NONMMUT047875.2	88.03	142	14	3	517	656	141	1	8e-27	123
XLOC_004009	NONMMUT047875.2	88.03	142	14	3	293	432	141	1	6e-27	123
XLOC_004011	NONMMUT008099.2	100	28	0	0	28	55	2068	2095	8e-07	56
XLOC_004014	NONMMUT034383.2	96.97	99	3	0	280	378	616	518	5e-42	172
XLOC_004014	NONMMUT034383.2	92.92	113	8	0	129	241	4028	3916	5e-38	161
XLOC_004014	NONMMUT034383.2	93.52	108	7	0	88	195	4023	3916	2e-37	159
XLOC_004021	NONMMUT067179.2	93.33	45	3	0	334	378	23	67	5e-09	65.9
XLOC_004021	NONMMUT067179.2	93.33	45	3	0	334	378	23	67	5e-09	65.9
XLOC_004021	NONMMUT067179.2	93.33	45	3	0	334	378	23	67	4e-09	65.9
XLOC_004021	NONMMUT067179.2	93.33	45	3	0	334	378	23	67	4e-09	65.9
XLOC_004021	NONMMUT067179.2	93.33	45	3	0	334	378	23	67	4e-09	65.9
XLOC_004021	NONMMUT113513.1	100	28	0	0	325	352	828	801	2e-06	56
XLOC_004035	NONMMUT000091.2	91.26	206	16	2	699	902	1	206	7e-65	250
XLOC_004035	NONMMUT000091.2	91.26	206	16	2	699	902	1	206	1e-64	250
XLOC_004036	NONMMUT035377.2	92	50	3	1	17	66	2797	2749	5e-08	60
XLOC_004037	NONMMUT058913.2	90	40	4	0	1311	1350	7562	7601	0.0007	48.1
XLOC_004037	NONMMUT058913.2	90	40	4	0	1318	1357	7562	7601	0.0008	48.1
XLOC_004041	NONMMUT129999.1	93.88	49	2	1	5	53	94	141	2e-09	65.9
XLOC_004042	NONMMUT017487.2	93.75	32	2	0	78	109	981	950	0.0006	48.1
[truncated: 3,940 more rows]

## Sheet: Rhesus
LncRNA	Rhesus_LncRNA	Identity	Length	Mismatch	Gap	Q_start	Q_end	O_start	O_end	E-value	Score
[truncated: 9,413 more rows]
