# Supplementary material for: Annotation and cluster analysis of spatiotemporal- and sex-related lncRNA expression in rhesus macaque brain
Source: Genome Res. 2017 Sep;27(9):1608–20. doi: 10.1101/gr.217463.116 (PMC5580719; doi:10.1101/gr.217463.116)
Supplement: Supplemental Material [file supp_gr.217463.116_Supplemental_Table_S4.xlsx]

## Sheet: Sheet1
Supplemental Table S4- Summary of the CAGE-Seq sequencing information in each brain area samples
	Area	Sample	Raw	Filtered	Filtering Percentage	Total Mapped	Total/ Filtered	Unique Mapped	Unique/ Total
	Cornu Ammonis (CA1)	CA1_01F	16522299	10062174	0.609006	7449361	0.7403	6874731	0.9229
		CA1_01M	16610763	9752655	0.587129	7356692	0.7543	6813869	0.9262
		CA1_04F	14311012	9214654	0.643886	7025661	0.7624	6442986	0.9171
		CA1_04M	14660514	8972131	0.611993	6786828	0.7564	6089385	0.8972
		CA1_10F	16804431	9726001	0.578776	7005419	0.7203	6301583	0.8995
		CA1_10M	17240075	9305891	0.539783	6618414	0.7112	6051448	0.9143
		CA1_20F	14113231	9069941	0.642655	6931946	0.7643	6390768	0.9219
		CA1_20M	15486807	5652238	0.364971	3996291	0.707	3609413	0.9032
	Cerebellar Cortex (CB)	CB_01F	7639288	6351877	0.831475	4603346	0.7247	4291961	0.9324
		CB_01M	7615401	6186352	0.812348	4500058	0.7274	4188608	0.9308
		CB_04F	7366252	6123144	0.831243	4395861	0.7179	4074301	0.9268
		CB_04M	7806109	6434505	0.824291	4875778	0.7578	4561665	0.9356
		CB_10F	21954223	12557836	0.572001	7728240	0.6154	7023720	0.9088
		CB_10M	7151791	6124735	0.856392	4404096	0.7191	4084694	0.9275
		CB_20F	7316003	6290047	0.859766	4477491	0.7118	4164036	0.93
		CB_20M	7713616	6800987	0.881686	4946063	0.7273	4575749	0.9251
	Dentate Gyrus (DG)	DG_01F	15814847	11658927	0.737214	7299526	0.6261	6522542	0.8936
		DG_01M	8774601	6111928	0.696548	3521753	0.5762	3201374	0.909
		DG_04F	8484370	5969194	0.703552	3743616	0.6272	3461181	0.9246
		DG_04M	8014368	6014837	0.750507	3874094	0.6441	3569282	0.9213
		DG_10F	7670900	6056528	0.789546	4190832	0.692	3913985	0.9339
		DG_10M	7406005	6312629	0.852366	4224604	0.6692	3915044	0.9267
		DG_20F	7866444	6147010	0.781422	4162696	0.6772	3888131	0.934
		DG_20M	9243484	7560836	0.817964	5149158	0.681	4680444	0.909
	Occipital Cortex (OC)	OC_01F	11873737	6600606	0.5559	3944062	0.5975	3645995	0.9244
		OC_01M	10917553	6189898	0.566968	3778655	0.6105	3483169	0.9218
		OC_04F	11764613	6358664	0.540491	4090479	0.6433	3738307	0.9139
		OC_04M	9447905	6126435	0.648444	4200148	0.6856	3860852	0.9192
		OC_10F	13847798	6124381	0.442264	3408718	0.5566	3128614	0.9178
		OC_10M	11775248	6509638	0.552824	3694508	0.5675	3385451	0.9163
		OC_20F	10705213	6568391	0.613569	4103381	0.6247	3750472	0.914
		OC_20M	9625469	6353307	0.660052	4020660	0.6328	3683669	0.9162
	Parietal Cortex (PC)	PC_01F	11574718	7109200	0.614201	4226269	0.5945	3859648	0.9133
		PC_01M	19351624	7523925	0.388801	4931147	0.6554	4320329	0.8761
		PC_04F	20091907	8535823	0.424839	5591057	0.655	4759739	0.8513
		PC_04M	25684262	9011186	0.350845	5635936	0.6254	4682404	0.8308
		PC_10F	20189984	7117118	0.352507	4863539	0.6834	4149722	0.8532
		PC_10M	9840321	8149989	0.828224	5492769	0.674	5112539	0.9308
		PC_20F	9116892	7331501	0.804167	4861837	0.6631	4359865	0.8968
		PC_20M	20648992	6928290	0.335527	4112904	0.5936	3610380	0.8778
	Posterior Cingulate Cortex (PCC)	PCC_01F	14308018	7878015	0.550601	4431433	0.5625	4141608	0.9346
		PCC_01M	15118353	6419579	0.424622	3074166	0.4789	2850571	0.9273
		PCC_04F	10109748	7730675	0.764675	5250195	0.6791	4809425	0.916
		PCC_04M	9675156	7475632	0.772663	5182350	0.6932	4835963	0.9332
		PCC_10F	13938748	7664855	0.549896	4477374	0.5841	4145985	0.926
		PCC_10M	19823577	9798573	0.494289	5508753	0.5622	5137692	0.9326
		PCC_20F	11262409	7913467	0.702644	5450203	0.6887	5068254	0.9299
		PCC_20M	10226560	7917953	0.774254	5460589	0.6896	5078823	0.9301
	Prefrontal Cortex (PFC)	PFC_01F	20121198	8440167	0.419466	5593719	0.6627	5184053	0.9268
		PFC_01M	18325510	7579271	0.413591	5145093	0.6788	4748951	0.923
		PFC_04F	19162156	7394242	0.385877	5357533	0.7246	4993333	0.932
		PFC_04M	17455172	7406780	0.424332	5456895	0.7367	5060192	0.9273
		PFC_10F	21972663	7373595	0.33558	5218148	0.7077	4886307	0.9364
		PFC_10M	18947114	7521838	0.396991	5571451	0.7407	5208745	0.9349
		PFC_20F	19232004	2618192	0.136137	1854006	0.7081	1738100	0.9375
		PFC_20M	21359769	7879884	0.368912	5735823	0.7279	5367739	0.9358
	Temporal Cortex (TC)	TC_01F	16672232	5748143	0.344773	4001249	0.6961	3663929	0.9157
		TC_01M	11355450	7053613	0.621165	4950328	0.7018	4547564	0.9186
		TC_04F	9457644	7569041	0.800309	5595553	0.7393	5102641	0.9119
		TC_04M	9441578	6868068	0.727428	5096347	0.742	4704057	0.923
		TC_10F	17979216	8683754	0.482988	4809251	0.5538	4364714	0.9076
		TC_10M	15670651	9401261	0.599928	6745609	0.7175	6204650	0.9198
		TC_20F	10661305	8611359	0.807721	6263005	0.7273	5801915	0.9264
		TC_20M	9083370	6985839	0.76908	5191311	0.7431	4794541	0.9236
