# Supplementary material for: Annotation and cluster analysis of spatiotemporal- and sex-related lncRNA expression in rhesus macaque brain
Source: Genome Res. 2017 Sep;27(9):1608–20. doi: 10.1101/gr.217463.116 (PMC5580719; doi:10.1101/gr.217463.116)
Supplement: Supplemental Material [file supp_gr.217463.116_Supplemental_Table_S5.xlsx]

## Sheet: legend
Supplemental Table S5-Correlation pairs statistics and the corresponding pairs in each lncRNA and mRNA modules.
network: Correlation pairs statistics with different threshold of lncRNA-mRNA, lncRNA-lncRNA, and mRNA-mRNA.
module pairs: Relationship between lncRNA and mRNA modules based on the correlation network, and red background represents for relation pairs more than 100.

## Sheet: network
	Network	Threshold	Pair number	Positive pair number(Per)	Negative pair number(Per)	LncRNA number in pairs	mRNA number in pairs
	LncRNA-mRNA	abs(cor)>=0.5, Pvalue<=0.05	15625515	12130090	3495425	8953	25799
				0.7763	0.2237
		abs(cor)>=0.7, Pvalue<=0.01	3341261	3105095	236166	5084	18418
				0.9293	0.0707
	LncRNA-LncRNA	abs(cor)>=0.5, Pvalue<=0.05	3795146	2833139	962007	8826	--
				0.7465	0.2535
		abs(cor)>=0.7, Pvalue<=0.01	703591	643759	59832	4980	--
				0.915	0.085
	mRNA-mRNA	abs(cor)>=0.5, Pvalue<=0.05	111456950	105855578	5601372	--	26386
				0.9497	0.0503
		abs(cor)>=0.7, Pvalue<=0.01	50525494	50028296	497198	--	21384
				0.9902	0.0098

## Sheet: module pairs
					LncRNA module
		Module		No module	0	1	2	3	4	5	6	7	8	9	10	11	12	13	14	15	16	17	18
			Gene Number/Module		694	794	443	396	369	207	138	123	63	58	57	46	44	41	41	38	36	35	33
		No module		2154257	3406	461904	12022	5266	7975	4707	7661	1070	287	99	588	119	324	164	465	350	40	148	45
	mRNA Module	0	1323	235	147	36	49	14	21	9	16	5	4	4	21	23	0	18	14	62	0	10	32
		1	2638	492204	50	125890	974	103	286	74	101	12	1	3	6	5	4	1	1	0	18	0	1
		2	662	4963	18	21	15	26	0	381	2661	8	0	9	173	0	0	0	4	0	1	0	0
		3	588	1767	12	24	88	749	0	48	157	15	1	0	0	1	2	0	16	0	2	0	0
		4	392	7302	12	29	193	16	9145	7	5	9	0	0	0	3	1	0	0	0	0	0	0
		5	316	296	8	20	9	5	0	0	0	3	0	0	0	0	1	0	148	0	0	0	0
		6	255	5691	0	329	42	919	6	491	261	273	0	5	0	0	0	0	0	1	0	0	0
		7	187	4254	1	49	13	2498	3	230	915	17	0	19	0	0	2	12	0	0	0	0	0
		8	168	3658	3	24	29	79	2	1151	634	18	0	0	39	0	0	0	0	0	0	1	0
		9	130	445	5	8	62	0	2	3	2	3	0	9	0	0	15	0	0	0	0	0	0
		10	116	4319	9	1	3724	7	184	0	1	0	0	0	0	0	0	0	0	0	0	0	0
		11	107	355	10	3	79	27	6	4	2	117	0	0	0	9	0	0	3	0	0	0	0
		12	81	46	8	3	0	2	3	1	0	6	102	0	1	0	0	0	0	0	0	0	1
		13	67	69	0	57	0	0	107	0	0	0	0	0	0	0	0	0	0	0	0	0	0
		14	40	32	0	1	2	1	4	2	0	0	0	0	1	0	0	0	0	0	0	0	4
