# Supplementary material for: Annotation and cluster analysis of spatiotemporal- and sex-related lncRNA expression in rhesus macaque brain
Source: Genome Res. 2017 Sep;27(9):1608–20. doi: 10.1101/gr.217463.116 (PMC5580719; doi:10.1101/gr.217463.116)
Supplement: Supplemental Material [file supp_gr.217463.116_Supplemental_Table_S6.xlsx]

## Sheet: legend
Supplemental Table S6 - Sequences of lncRNA in situ hybridization (ISH) probe and quantitative real time PCR preparation primers
ISH: Sequences of lncRNA in situ hybridization (ISH) probe preparation primers
qRT-PCR: sequences of quantitative real time PCR primers

## Sheet: ISH
	Table S6A - Sequences of lncRNA in situ hybrodization (ISH) probe preparation primers
	lncRNA gene	Sense primer	Antisense primer
	RP11-491F9.1	5'-attgaattcgagtgccttgagccctaatcat-3'	5'-ataagaaggatccgggcctgatggcttctgatagac-3'
	AC027613.1	5'-catgaatatcaaccgaaccagtccatgc-3'	5'-tgtactaggaatcaaagacaggcgcatacagga-3'
	AC016757.3	5'-cctcagtcattgatttccgctgcacttcct-3'	5'-ggccttcgcggcccggcgcaggccacgcccctt -3'
	AC112693.3	5'-gtgtggtattctctcagttctcttaaccata-3'	5'-attgccaataattttatagacaaaatatttc-3'
	HCG11	5'-tcctgaagcattctgccctg-3'	5'-ggcagggatgcaggtaatca-3'
	NONGGOT004660.1	5'-tcccagtggccttttcttttg-3'	5'-cccctttaacagaaggcagg-3'
	NONHSAT163151.1	5'-caggtatttgattcacccacacc-3'	5'-gaattttggaggagccaggg-3'
	Gm37142	5'-aggtgcaaagcaagtctcgt-3'	5'-ctcccacgctgactattggt-3'
	NONHSAG047825.1	5'-gctggagtgccaagtagatctc-3'	5'-agggaggaagtcaggggtt-3'
	NONMMLT001498.1	5'-tctccaggcaccgcacaca-3'	5'-taggaagacgctaagtccca-3'
	lnc-OCM-2	5'-aagaaactctgtgcaacgcag-3'	5'-aggaagaagccaagagacaaga-3'
	LINC00670	5'-tgccggtgtgagcccacaag-3'	5'-cctgcaccgtggggagccgga-3'
	AC132825.2	5'-tctaaagttttttcatagtaggt-3'	5'-tgacccttagccataatatga-3'

## Sheet: qRT-PCR
		TableS4A-Sequences of quantitative real time PCR primers, Related to Figure 4 and S11.
		lncRNA gene	Sense primer	Antisense primer
		LINC00670	5'-ggtcctgggagaaatggtgg-3'	5'-gactggcatcttgtcaccga-3'
		AC027613.1	5'-ctgactcccaccacatctcg-3'	5'-caccttgctgaagtttgcgt-3'
		AC016757.3	5'-tcagtcattgatttccgctgca-3'	5'-tctccgacatcgcgcaacag-3'
		AC112693.3	5'-gtgtggtattctctcagttctc-3'	5'-acataatttagtatgacaac-3'
		HCG11	5'-ttgctgttgagacattgccc-3'	5'-gggttagaaagggcgcaaac-3'
		Gm37142	5'-cccgttaggtgcaaagcaag-3'	5'-aatccgaacaagaggcgatgt-3'
		RP11-491F9.1	5'-cccgatggctctggaagtaa-3'	5'-gtgaaaccatccttgctggg-3'
		NONHSAG047825.1	5'-ccaagactttggatgggcaaata-3'	5'-agcatcgatcagcccgagggtc-3'
		Tsix	5'-ttcttttccctgcgttcacttg-3'	5'-ctcaaacaagccctctggcg-3'
		Rmst	5'-cagagcatttgtcaggatgttg-3'	5'-gagaagacgagaacaagggca-3'
		Xist	5'-ggcacacaggggaggaaaaa-3'	5'-tgtggctcttctttcacgct-3'
		Miat	5'-gtggacgactggatctggct-3'	5'-actccacacactctaacacctct-3'
		mouse Ptb	5'-aaccctgagagagtcacacc-3'	5'-tgcacactctgatgcttgga-3'
		mouse Emx2	5'-attacgtggtgggagcggaa-3'	5'-cttgctctgtgctgtccattt-3'
		mouse Lhx2	5'-cccctgatttgcgccct-3'	5'-gtcacaagggcagggggt-3'
		mouse Nr2e1	5'-gctgtccccggaaactcgg-3'	5'-ggacagagatggagacacgga-3'
		mouse Map2	5'-gtgctgtgtgctccaagttt-3'	5'-attctcaaacggctggtggt-3'
		mouse Kif3a	5'-gaagggaccaagcaggtaaaaaga-3'	5'-tgatgctcttgttgggcttt-3'
		mouse Foxg1	5'-cgagacggagggagaacaca-3'	5'-ggcatgtagcaaaagagcttcc-3'
		Gapdh	5'-aggtcggtgtgaacggatttg-3'	5'-tgtagaccatgtagttgaggtca-3'
