# Supplementary material for: Annotation and cluster analysis of spatiotemporal- and sex-related lncRNA expression in rhesus macaque brain
Source: HighWire-hosted journal article supplement (doi:10.1101/gr.217463.116), 2017-07-07
Supplement: Supplemental_Material.tar.gz [file All_DEG_merged_RPKM_WGCNA.xls]

names.DataExprG.	DG_01F	DG_01M	DG_04F	DG_04M	DG_10F	DG_10M	DG_20F	DG_20M	FL_01F	FL_01M	FL_04F	FL_04M	FL_10F	FL_10M	FL_20F	FL_20M	FMC_01F	FMC_01M	FMC_04F	FMC_04M	FMC_10F	FMC_10M	FMC_20F	FMC_20M	HI_01F	HI_01M	HI_04F	HI_04M	HI_10F	HI_10M	HI_20F	HI_20M	CE_01F	CE_01M	CE_04F	CE_04M	CE_10F	CE_10M	CE_20F	CE_20M	OL_01F	OL_01M	OL_04F	OL_04M	OL_10F	OL_10M	OL_20F	OL_20M	TL_01F
ENSMMUG00000000002	0.2	0.21	0.19	0.25	0.49	0.27	0.07	0.16	0.33	0.58	0.52	0.54	0.63	0.47	0.31	0.4	0.42	0.43	0.57	0.24	0.47	0.61	0.1	0.4	0.46	0.33	0.3	0.07	0.37	0.24	0.22	0.45	0.22	0.67	0.39	0.26	0.26	0.71	0.46	0.5	0.34	0.35	0.36	0.38	0.53	0.45	0.42	0.4	0.73
ENSMMUG00000000009	0.66	0.68	1.75	0.77	0.61	0.58	0.79	0.77	0.61	0.9	0.82	0.7	0.57	0.34	0.64	0.69	0.57	0.49	1.03	0.82	0.28	0.48	0.58	0.51	0.85	0.65	1.26	1.11	0.52	0.72	1.01	1.2	0.43	0.42	0.72	0.52	0.31	0.4	0.53	0.43	0.75	0.59	0.89	0.59	0.55	0.62	0.75	0.82	0.92
ENSMMUG00000000015	0.02	0	0.06	0	0.02	0	0	0	0.04	0	0.03	0	0.03	0	0.02	0	0.19	0	0	0.01	0	0	0	0	0.04	0	0	0.03	0	0	0	0	0.57	0.45	0.04	0.3	0.08	0.07	0.05	0.08	0.05	0.03	0	0.03	0.05	0	0	0.12	0.04
ENSMMUG00000000023	0.01	0.02	0	0.01	0.01	0	0	0	0	0.09	0.07	0.03	0.01	0	0	0.01	0	0.03	0.01	0	0	0.02	0.01	0.01	0.04	0.02	0	0.03	0	0	0.03	0	0.05	0.03	0.1	0.03	0.09	0.01	0.02	0.06	0.06	0.02	0.06	0.14	0.22	0.06	0.05	0.17	0.02
ENSMMUG00000000024	0.03	0.06	0.01	0.02	0.02	0.05	0.02	0.03	0.16	0.29	0.67	0.23	0.66	0.3	0.5	0.43	0.21	0.27	0.41	0.3	0.23	0.06	0.03	0.04	0.06	0.07	0.03	0.02	0.04	0.06	0.05	0.04	0.39	0.31	0.28	0.12	0.25	0.08	0.2	0.4	0.21	0.18	0.27	0.06	0.17	0.29	0.24	0.38	0.15
ENSMMUG00000000032	0.21	0.31	0.78	0.56	0.18	0.12	0.15	0.32	0.21	0.39	0.58	0.58	0.78	0.76	0.82	0.66	0.71	0.53	0.23	0.36	0.91	0.13	1.21	0.19	0.23	0.59	0.65	0.56	0.54	0.15	0.28	0.27	0.6	0.93	0.72	1.05	0.85	0.86	0.8	0.88	0.24	0.84	0.7	1.09	0.99	0.72	0.76	1	0.67
ENSMMUG00000000034	0.04	0.03	0.07	0.04	0.05	0.03	0.07	0.12	0.08	0.03	0.04	0.05	0.05	0.06	0.05	0.02	0.08	0.01	0.16	0.05	0.01	0.02	0.11	0.06	0.05	0.03	0.12	0.04	0	0.03	0.02	0.06	0.05	0.08	0.09	0.04	0.04	0.11	0.05	0.08	0.01	0.05	0.02	0.12	0.04	0.02	0.01	0.13	0.08
ENSMMUG00000000041	0.28	0.13	0.24	0.13	0.18	0.12	0.1	0.08	0.3	0.39	0.26	0.22	0.33	0.07	0.21	0.33	0.36	0.32	0.18	0.31	0.16	0.19	0.04	0.05	0.61	0.88	0.39	0.31	0.16	0.62	0.12	0.2	0.22	0.18	0.3	0.16	0.24	0.12	0.22	0.2	0.34	0.38	0.26	0.12	0.13	0.13	0.25	0.34	0.24
ENSMMUG00000000047	0.01	0	0	0	0	0	0	0.02	0.05	0	0	0	0.01	0	0	0	0	0.02	0	0.01	0	0	0	0	0.01	0	0	0.02	0	0	0	0	0	0	0.07	0.03	0	0.03	0	0.03	0	0	0	0.01	0	0	0	0.02	0
ENSMMUG00000000048	0.03	0.02	0.04	0.02	0.03	0.02	0.04	0.04	0.08	0.08	0.08	0.05	0.28	0.16	0.2	0.27	0.04	0.03	0.06	0.08	0.14	0.11	0.04	0.06	0.06	0.03	0.05	0.01	0.04	0.1	0.07	0.01	0.05	0.12	0.06	0.03	0.13	0.01	0.04	0.05	0.11	0.1	0.06	0.06	0.33	0.08	0.19	0.11	0.23
ENSMMUG00000000051	0.23	0.24	0.15	0.21	0.25	0.31	0.2	0.14	0.12	0.16	0.25	0.27	0.34	0.22	0.27	0.2	0.13	0.23	0.14	0.27	0.27	0.3	0.15	0.42	0.2	0.3	0.16	0.12	0.31	0.3	0.23	0.11	1.06	1.87	1.32	1.58	1.4	0.96	1.36	1.37	0.84	1.01	0.88	1.17	1.32	1.22	0.8	1.03	0.5
ENSMMUG00000000052	0.21	0.09	0.17	0.1	0.21	0.1	0.12	0.06	0.16	0.19	0.6	0.14	0.13	0.03	0.18	0.05	0.39	0.26	0.3	0.17	0.07	0.13	0.11	0.15	0.47	0.58	0.21	0.44	0.24	0.12	0.13	0.03	0.45	0.32	0.48	0.73	0.52	0.31	0.7	0.45	0.59	0.4	0.38	0.3	0.4	0.42	0.25	0.32	0.21
ENSMMUG00000000053	0.35	0.49	0.37	0.23	0.41	0.18	0.18	0.31	0.16	0.25	0.33	0.16	0.54	0.2	0.09	0.14	0.24	0.45	0.12	0.34	0.34	0.03	0	0.3	0.2	0.32	0.15	0.37	0.33	0	0.32	0.31	0.16	0.14	0.22	0.17	0.26	0.53	0.35	0.05	0.09	0.09	0.45	0.29	0.34	0.22	0	0.25	0.51
ENSMMUG00000000064	0	0.02	0.02	0	0.06	0	0	0.03	0.02	0	0	0	0.05	0	0.02	0.05	0	0	0	0	0	0	0	0	0	0	0.08	0.03	0	0	0	0	0	0.1	0	0	0.26	0.26	0.11	0.14	0.03	0	0.02	0	0	0	0	0	0.03
ENSMMUG00000000073	0	0	0	0	0	0	0	0	0	0	0	0	0	0	0	0	0	0	0	0	0	0	0	0	0	0	0	0	0	0	0	0	4.14	3.02	3.56	2.55	1.01	1.74	1.48	1.98	0.49	0.44	0.85	0.66	0.61	0.68	0.83	0.57	0.48
ENSMMUG00000000076	0	0	0	0	0	0	0	0	0	0	0	0	0	0	0	0	0	0	0	0	0	0	0	0	0	0	0	0	0	0	0	0	0.14	0.08	0.06	0.04	0.03	0.02	0.1	0.19	0	0.04	0.09	0.01	0.04	0.01	0.09	0.04	0.02
ENSMMUG00000000079	0.08	0.03	0.07	0.08	0.1	0.13	0.22	0.08	0.08	0.07	0.04	0.08	0.04	0.06	0.07	0.12	0.05	0.04	0.13	0.07	0.16	0.01	0.03	0.01	0.01	0.05	0.05	0.11	0.1	0.23	0.12	0.07	1.39	1.67	1.37	1.57	1.64	2.2	2.2	1.52	0.35	0.21	0.57	0.81	0.73	0.78	0.5	0.63	0.2
ENSMMUG00000000088	0	0.03	0	0	0	0	0	0	0	0.04	0	0	0	0.03	0	0	0.06	0.1	0.02	0	0	0	0	0.02	0	0	0	0.03	0	0	0	0	0	0.02	0	0.04	0	0.02	0	0	0	0	0	0	0	0	0	0	0
ENSMMUG00000000089	0.01	0.03	0.01	0.03	0.02	0.02	0.02	0.04	0.03	0.07	0.21	0.11	0.27	0.04	0.19	0.19	0.08	0.16	0.17	0.15	0	0.01	0.01	0	0.03	0.02	0.05	0.08	0.05	0.1	0.01	0.01	0.39	0.9	0.55	0.4	0.37	0.19	0.42	0.59	1.46	2.95	1.5	0.92	0.83	1.62	0.6	0.76	0.52
ENSMMUG00000000094	8.63	11.24	7.2	9.05	15.19	14.58	16.09	11.91	13.46	7.03	8.54	8.58	9.24	9.7	12.49	11.4	7.64	8.21	7.97	7.5	9.72	8.06	9.29	10.68	8.48	13.6	11.19	9.19	8.14	10.77	14.9	10.01	9	15.58	11.5	12.09	9.08	11.34	13.29	13.54	7.07	11.27	10.7	8.28	10.22	10.05	12.66	11.55	6.54
ENSMMUG00000000100	21.67	20.04	26.9	23.73	20.35	25.49	18.83	22.47	37.88	44.21	44.35	38.29	36.51	34.28	31.63	31.94	32.35	32.87	29.59	40.63	28.76	26.23	26.18	19.61	22.13	19	19.46	19.47	25.02	27.81	22.99	21.21	8.55	7.31	8.08	7.15	7.69	7.82	8.33	6.98	53.84	49.57	27.27	26.58	24.26	25.6	21.22	24.56	62.94
ENSMMUG00000000101	0.03	0.14	0.12	0.1	0.05	0.08	0.25	0.11	0.03	0.04	0.09	0.04	0.04	0.06	0	0.23	0.03	0	0.46	0.05	0.06	0.16	0.07	0.03	0.03	0.07	0.17	0.31	0.08	0	0	0	0.23	0.06	0.03	0	0.04	0.08	0.1	0.23	0.13	0.05	0.28	0.05	0	0.1	0.11	0.04	0.09
ENSMMUG00000000102	0.27	0.46	0.05	0.29	0.12	0.2	0.12	0.13	0.43	0.25	0.08	0.14	0.11	0.11	0.15	0.17	0.13	0.31	0.09	0.19	0.09	0.16	0.11	0.1	0.21	0.34	0.1	0.08	0.07	0.01	0.06	0.03	0.27	0.27	0.19	0.16	0.19	0.22	0.15	0.18	0.18	0.32	0.14	0.2	0.12	0.14	0.19	0.21	0.41
ENSMMUG00000000105	2.32	1.88	4.15	2.04	1.09	1.3	1.54	2.03	1.91	4.11	4.16	4.28	1.96	2.52	2.67	3.17	2.81	2.42	3.59	3.83	2.2	3.05	3.45	2.72	3.24	2.59	4.66	3.14	2.21	3.14	3.37	3.18	1.71	1.81	1.86	2.54	1.88	1.55	1.65	2.23	3.9	1.36	4.47	3.17	1.39	4.55	3.63	2.62	4.05
ENSMMUG00000000109	0.05	0.16	0.08	0.06	0.06	0.05	0.09	0.08	0.03	0.06	0.02	0.05	0.02	0.04	0.05	0.03	0.05	0.01	0.01	0	0	0.01	0.02	0	0.03	0.04	0.02	0.05	0.09	0.01	0.05	0.04	0.08	0.05	0.09	0.07	0.03	0.02	0.01	0.06	0.09	0.16	0.04	0.01	0.04	0.05	0.01	0.06	0.11
ENSMMUG00000000111	6.41	6.29	8.67	10	12.3	10.93	7.13	8.82	8.86	9.08	12.19	10.92	13.99	12.99	14.46	13.53	6.46	5.75	8.59	11.81	10.17	8.93	15.06	8.66	4.9	5.32	4.88	6.31	5.31	6.15	7.15	4.48	2.07	2.62	2.57	3.55	6.53	7.18	7.69	5.72	15.46	14.29	14.01	14.78	13.72	16.05	14.38	14.13	16.77
ENSMMUG00000000120	0	0.6	0.03	0	0	0.06	0	0	0.04	0	0	0	0	0.2	0	0	0	0.27	0.12	0	0.17	0	0	0	0	0.24	0	0.21	0	0	0	0	0.05	0.29	0	0	0	0	0	0	0.03	0.21	0	0	0	0	0	0	0
ENSMMUG00000000121	0.02	0.03	0.05	0.05	0.02	0.06	0.04	0.03	0.03	0.07	0.09	0.08	0.08	0.13	0.03	0.05	0.05	0.01	0	0.07	0.05	0.04	0.06	0.03	0.02	0.04	0.04	0.05	0.05	0.01	0.04	0.01	0.06	0.09	0.07	0.01	0.09	0.03	0.05	0.07	0.1	0.13	0.14	0.03	0.13	0.25	0.08	0.1	0.17
ENSMMUG00000000124	0	0	0	0	0	0	0	0	0	0	0	0	0	0	0	0	0	0	0	0	0	0	0	0	0	0	0	0	0	0	0	0	0.06	0.03	0.02	0.1	0.01	0.01	0.05	0.04	0.08	0.02	0.09	0.07	0.02	0.01	0.04	0.11	0.05
ENSMMUG00000000129	0.4	0.2	0.28	0.28	0.21	0.13	0.19	0.24	0.28	0.53	0.4	0.21	0.17	0.18	0.17	0.25	0.2	0.16	0.28	0.3	0.1	0.22	0.23	0.19	0.41	0.39	0.56	0.36	0.53	0.51	0.18	0.29	0.27	0.3	0.26	0.2	0.17	0.14	0.24	0.19	0.74	0.56	0.69	0.35	0.38	0.32	0.29	0.45	0.22
ENSMMUG00000000130	1.58	1.4	2.98	1.45	0.79	1.14	1.32	1.24	8.14	7.25	9.57	9.39	7.51	7.96	8.82	7.61	3.84	4.11	6.82	6.81	4.9	5.05	5.59	5.75	3.64	3.5	3.1	2.82	1.73	2.32	3.23	2.11	1.73	2.18	2.22	2.6	1.57	1.6	2.01	1.88	20.19	22.79	15.6	18.28	12.83	17.92	19.32	17.4	14.49
ENSMMUG00000000142	0	0	0	0	0	0	0	0	0	0	0	0	0	0	0	0	0	0	0	0	0	0	0	0	0	0	0	0	0	0	0	0	0.35	0.32	0.39	0	0.23	0.16	0.03	0.13	7.64	4.4	2.96	4.48	8.31	7.04	4.04	3.78	6.38
ENSMMUG00000000147	0	0	0	0	0	0	0	0	0	0	0	0	0	0	0	0	0	0	0	0	0	0	0	0	0	0	0	0	0	0	0	0	0	0.04	0	0	0	0	0	0	0.1	0.02	0.2	0.02	0	0	0.03	0	0
ENSMMUG00000000151	0.01	0	0	0.02	0	0.01	0.01	0.01	0.05	0.04	0.06	0.06	0.02	0.01	0.01	0.01	0.04	0.02	0	0.02	0.03	0.03	0.02	0	0.01	0.01	0	0.03	0	0	0.02	0.02	0.01	0.03	0.01	0.01	0	0.04	0.03	0.01	0	0.02	0.02	0.01	0	0.01	0.05	0	0.06
ENSMMUG00000000157	0.04	0.02	0.02	0	0.01	0	0.02	0.03	0.04	0.01	0.05	0.04	0.05	0.04	0.05	0.01	0	0.02	0.02	0	0.01	0	0.01	0.04	0.01	0	0.08	0.02	0.01	0.04	0.01	0.03	0.03	0.02	0.02	0.01	0.06	0.02	0	0.01	0	0.01	0.01	0.01	0	0.11	0	0.02	0
ENSMMUG00000000161	0.57	0.57	0.21	0.46	0.11	0.03	0.24	0.21	0.22	0.27	0.91	0.4	0.64	0.92	0.89	0.32	0.21	0.3	0.58	0.65	0.14	0.25	0.21	0.24	1.27	0.46	1.57	1.24	1.17	1.98	1.07	1.22	0.26	0.32	0.48	0.19	0.94	1	1.98	2.8	0.26	0.15	0.72	0.36	0.44	1.39	0.77	1.02	0.17
ENSMMUG00000000163	0.04	0.03	0.08	0.03	0.04	0.01	0.03	0.05	0.51	0.51	0.39	0.35	0.42	0.4	0.52	0.43	0.23	0.36	0.24	0.24	0.32	0.29	0.23	0.42	0.08	0.11	0.02	0.05	0.03	0.06	0.06	0.05	0.06	0.05	0.06	0.12	0.02	0.06	0.06	0.07	0.08	0.13	0.37	0.11	0.18	0.31	0.34	0.27	0.43
ENSMMUG00000000170	0.05	0.05	0.15	0.06	0.05	0.05	0.24	0.09	0.08	0.04	0.03	0.13	0.08	0.11	0.19	0.1	0.06	0.12	0.09	0.11	0.06	0.1	0.17	0.04	0.05	0.05	0.06	0.06	0.04	0.05	0.22	0.1	0.06	0.06	0.07	0.1	0.06	0.03	0.22	0.09	0.03	0.06	0.11	0.07	0.11	0.05	0.17	0.09	0.07
ENSMMUG00000000175	0.2	0.04	0	0.04	0	0.02	0	0.04	0	0.03	0	0	0	0	0	0.06	0.06	0.06	0.02	0	0	0.1	0	0	0.02	0.03	0	0.07	0	0.07	0.04	0	0	0.12	0	0	0.1	0	0	0.03	0.04	0.07	0	0.14	0.1	0.14	0	0.02	0
ENSMMUG00000000177	0.5	0.53	0.51	0.57	0.42	0.57	0.16	0.54	0.48	0.78	0.55	0.84	0.44	0.6	0.87	0.68	0.37	0.18	0.44	0.57	0.47	0.26	0.91	0.7	0.19	0.33	0.46	0.5	0.37	0.25	0.17	0.4	0.02	0.05	0	0.04	0	0.02	0	0.13	0.43	0.18	0.24	0.1	0.11	0.07	0.2	0.24	0.34
ENSMMUG00000000180	1.49	1.91	1.1	0.99	0.68	0.54	0.56	0.75	2.27	2.14	2.01	2.39	1.34	1.62	1.1	1.04	1.87	1.3	0.84	1.47	0.84	1.11	0.91	0.73	2.19	1.67	0.76	1.14	0.78	0.98	0.87	0.86	1.22	1.43	0.85	0.4	0.94	0.7	0.41	0.63	1.67	2.18	1.15	2.02	0.69	1.29	0.64	0.96	2.5
ENSMMUG00000000181	2.12	1.71	3.67	2.28	3.41	2.83	1.89	2.15	7.9	7.85	5.59	5.26	4.62	4.25	4.65	4.47	4.88	4.66	4.11	5.63	3.3	2.79	3.45	3.46	2.55	2.98	1.86	1.22	0.9	1.11	1.53	1.09	29.01	22.35	22.73	23.58	18.66	15.79	17.97	13.42	150.47	153.02	83.72	68.86	82.71	63.18	61.09	50.16	147.99
ENSMMUG00000000196	0.05	0.07	0.03	0.05	0.03	0.08	0.14	0.06	0.03	0.03	0.04	0.04	0.07	0.02	0.03	0.07	0.02	0.04	0.1	0.09	0.07	0.08	0.08	0.21	0.09	0.12	0.11	0.13	0.09	0.11	0.12	0.05	0.49	0.72	0.44	0.83	0.53	0.65	0.74	0.93	0.35	0.36	0.4	0.45	0.61	0.5	0.83	0.51	0.25
ENSMMUG00000000200	0.36	0.44	0.58	0.57	0.43	0.68	0.23	0.4	0.88	2.58	1.24	0.95	2.97	1.45	0.81	1.36	0.46	0.53	0.7	0.32	0.88	0.5	0.29	0.71	0.45	0.74	7.4	4.88	4.18	1.75	3.57	1.36	2.66	1.59	2.34	1.56	0.47	0.77	0.73	1.09	0.28	0.23	0.52	0.34	0.43	0.6	0.19	0.3	0.92
ENSMMUG00000000202	0.01	0.03	0.01	0.01	0.01	0	0.03	0.03	0.03	0.01	0	0.02	0.02	0.02	0	0.01	0.02	0	0.03	0.04	0	0.03	0	0.02	0.02	0.03	0.02	0.01	0.01	0	0.05	0	0.01	0.03	0.04	0.05	0.03	0.01	0.07	0.05	0.01	0.02	0.01	0	0	0.01	0.03	0.01	0.03
ENSMMUG00000000205	1.42	1.75	2.14	1.36	1.59	1.49	1.19	1.35	1.9	1.81	1.56	1.73	1.23	1.02	1.4	1.09	1.43	1.31	1.67	1.76	1.34	1.01	1.14	0.85	2.33	1.68	2.75	1.51	1.67	1.51	1.36	1.84	6.99	7.31	11.21	11.06	6.99	6.53	7.62	6.08	12.72	16.84	12.36	12.56	10.75	14.95	11.24	11	12.83
ENSMMUG00000000207	0.01	0.02	0.06	0	0.06	0.01	0.05	0.04	0.05	0	0.09	0	0.04	0.05	0.02	0	0.05	0.02	0	0.02	0.06	0.12	0.04	0.04	0.08	0.05	0.1	0.04	0	0.12	0.03	0	1.23	0.73	0.28	0.42	0.06	0.16	0.47	0.2	0.02	0.09	0.06	0	0.01	0.03	0	0.08	0.02
ENSMMUG00000000208	1.37	1.21	0.54	0.67	0.45	0.41	0.76	1.07	0.72	0.69	0.7	0.61	0.6	0.43	0.65	0.34	0.79	0.51	0.49	0.39	0.63	0.5	0.76	0.63	0.82	0.52	0.42	0.57	0.61	0.33	0.48	0.46	106.62	95.99	110.52	101.81	80.2	57.2	89.38	60.3	65.14	65.38	48.35	39.82	33.27	45.59	33.31	36.11	23.85
ENSMMUG00000000215	0.32	0.29	0.12	0.12	0.09	0.09	0.12	0.14	0.28	0.29	0.14	0.21	0.16	0.15	0.17	0.22	0.12	0.23	0.08	0.14	0.13	0.14	0.12	0.12	0.24	0.11	0.06	0.17	0.16	0.1	0.16	0.14	0.57	0.62	0.42	0.51	0.5	0.28	0.7	0.71	0.66	0.47	0.21	0.44	0.53	0.21	0.38	0.47	1.06
ENSMMUG00000000218	0.07	0.1	0.1	0.08	0.1	0.21	0	0.04	0.15	0.17	0	0.03	0.17	0.19	0.05	0.13	0.02	0.03	0.05	0.02	0.08	0.06	0.12	0.08	0.13	0.09	0.11	0.24	0.13	0.06	0.14	0.07	0.08	0.16	0.28	0.32	0.13	0.15	0.14	0.17	0.14	0.03	0	0.23	0.08	0.17	0.11	0.26	0.08
ENSMMUG00000000221	0.29	0.27	0.31	0.22	0.33	0.31	0.18	0.27	0.2	0.36	0.49	0.36	0.45	0.47	0.32	0.62	0.05	0.25	0.6	0.4	0.2	0.19	0.21	0.13	0.03	0.15	0.31	0.4	0.22	0.48	0.24	0.23	0.71	0.97	0.65	0.63	0.6	0.5	0.86	0.51	0.49	0.73	0.55	0.29	0.62	0.28	0.37	0.6	0.3
ENSMMUG00000000222	0.03	0.1	0	0.01	0.01	0.01	0	0	0	0	0.08	0	0	0	0	0	0	0	0	0.03	0	0.06	0	0.02	0.06	0	0.12	0	0.02	0.11	0	0.12	0.03	0.05	0.02	0	0	0	0.1	0.07	0	0.04	0.04	0.01	0.02	0.03	0	0.05	0.02
ENSMMUG00000000227	0.8	1.06	3.17	1.43	1.29	1	2.94	2.78	1.12	0.8	1.97	1.43	1.76	2.04	2.78	3.12	0.82	0.59	2.1	1.35	1.38	2.07	2.83	2.72	2.12	3.05	8.07	6.74	4.29	8.35	6.91	8.82	0.55	0.9	1.26	1.16	0.95	1.41	1.14	1.52	1.13	1.18	1.97	2.65	1.7	1.89	4.47	2.79	1.03
ENSMMUG00000000233	0	0	0	0	0	0	0	0	0	0	0	0	0.04	0	0	0	0.16	0	0	0.02	0	0	0	0	0	0	0	0	0	0	0	0	0	0	0	0.46	0	0	0.04	0	0	0	0	0	0.03	0	0	0.06	0
ENSMMUG00000000238	3.56	3.17	3.22	2.88	4.1	3.92	2.6	3.39	4.79	3.84	1.74	3.16	2.37	2.59	2.3	2.97	3.61	3.62	3.52	2.79	2.12	2.38	1.43	2.33	3.25	3.51	2.1	1.68	1.34	1.53	2.37	1.48	18.72	13.16	21.12	15	11.58	11.56	12.25	11.34	20.55	26.76	16.78	15.44	15.24	13.75	13.37	14.33	22.43
ENSMMUG00000000240	0	0	0	0.01	0.01	0.02	0	0.02	0	0.01	0.01	0.01	0.01	0.02	0.01	0.01	0.02	0	0.01	0	0	0.01	0	0.01	0	0	0	0.01	0.01	0.01	0	0	0.01	0.01	0.05	0.02	0.03	0.07	0.03	0.05	0.03	0	0.02	0.04	0	0.06	0.01	0.05	0.03
ENSMMUG00000000243	0	0	0	0	0	0	0	0	0	0	0	0	0	0	0	0	0	0	0	0	0	0	0	0	0	0	0	0	0	0	0	0	0	0.04	0.04	0.07	0	0.01	0.03	0.04	0.02	0.03	0	0.01	0	0.02	0	0.05	0.05
ENSMMUG00000000245	0.05	0.05	0.04	0.06	0.05	0.06	0.06	0.06	0.05	0.07	0.04	0.04	0.04	0.05	0.04	0.04	0.06	0.07	0.03	0.02	0.04	0.06	0.05	0.05	0.05	0.07	0.07	0.04	0.05	0.05	0.09	0.05	0.07	0.08	0.08	0.05	0.05	0.07	0.08	0.07	0.09	0.07	0.07	0.12	0.05	0.09	0.11	0.06	0.06
ENSMMUG00000000255	0	0	0.01	0.1	0.01	0	0	0	0	0	0	0	0	0.03	0	0.06	0.03	0	0.01	0	0	0	0	0	0	0	0	0	0	0.02	0.05	0.03	0	0.02	0	0.04	0	0.04	0	0.02	0	0.01	0.03	0	0	0.04	0	0.02	0.04
ENSMMUG00000000256	0.08	0.23	0.18	0.19	0.07	0.07	0.09	0.12	0.14	0.07	0.14	0.27	0.09	0.15	0.15	0.19	0.03	0.2	0.11	0.44	0.07	0.13	0.24	0.06	0.11	0.09	0.09	0.29	0.19	0.38	0.07	0.17	0.03	0.1	0.05	0.07	0.02	0.04	0.15	0.06	0.11	0.13	0	0.11	0.13	0.06	0.05	0.09	0.13
ENSMMUG00000000261	0.3	0.46	0.46	0.53	0.25	0.29	0.51	0.52	0.53	0.7	1.1	0.91	0.67	0.72	0.94	1.1	0.63	0.57	0.94	0.87	0.74	0.82	1.07	0.96	0.58	0.43	0.79	0.64	0.26	0.3	0.81	0.75	0.81	0.8	0.77	1.03	0.62	0.56	0.78	0.71	0.84	0.63	1.32	0.91	0.49	0.75	1.13	1.05	0.8
ENSMMUG00000000262	0	0	0.01	0.03	0	0.01	0.05	0	0.04	0	0.01	0.04	0.05	0	0.1	0.03	0.07	0	0.01	0	0.01	0.03	0.01	0.03	0.01	0	0.03	0.01	0.02	0	0.03	0.05	0	0.05	0.03	0.06	0.06	0.05	0.02	0.09	0.11	0.06	0.03	0	0.11	0.01	0.09	0.12	0.07
ENSMMUG00000000265	0.4	0.41	0.62	0.33	0.34	0.36	0.24	0.34	0.47	0.69	0.79	0.49	0.47	0.52	0.53	0.6	0.88	0.54	0.75	0.54	0.58	0.57	0.62	0.6	0.63	0.51	0.62	0.42	0.28	0.52	0.5	0.56	0.2	0.17	0.47	0.29	0.16	0.18	0.1	0.11	1.41	1.25	1.12	1.04	0.95	1.93	0.72	0.7	1.61
ENSMMUG00000000266	0.1	0.04	0.06	0.03	0.08	0.08	0.07	0.08	0.1	0.1	0.19	0.18	0.29	0.1	0.21	0.16	0.05	0.11	0.12	0.2	0.1	0.18	0.14	0.11	0.16	0.03	0.09	0.12	0.06	0.2	0.05	0.02	0.18	0.13	0.04	0.16	0.33	0.05	0.45	0.67	0.4	0.36	0.1	0.27	0.45	0.27	0.25	0.25	0.47
ENSMMUG00000000270	0.05	0.01	0	0.02	0.06	0.03	0.02	0	0.12	0.11	0.1	0.03	0.1	0.03	0.03	0.04	0.01	0.07	0.07	0.11	0.09	0.03	0.04	0.08	0.06	0.07	0.08	0.01	0.1	0.03	0.06	0.02	0.03	0.03	0.02	0.09	0.05	0.05	0.06	0.02	0.29	0.23	0.26	0.08	0.29	0.31	0.24	0.26	0.23
ENSMMUG00000000271	0.48	0.62	0.52	0.23	0.24	0.37	0.3	0.27	0.67	0.86	0.75	0.72	0.33	0.7	1.36	0.43	0.94	0.94	0.85	0.89	0.42	0.85	0.72	0.4	0.37	0.48	0.4	0.3	0.48	0.69	0.61	0.55	0.65	0.4	0.6	0.51	0.7	0.89	1.29	0.93	1.13	0.91	0.23	0.52	0.87	0.61	0.78	0.5	0.66
ENSMMUG00000000288	0.13	0.17	0.19	0.25	0.05	0.15	0.14	0.11	0.02	0.16	0.18	0.11	0.21	0.17	0.23	0.52	0.25	0.12	0.04	0.25	0.21	0.2	0	0.01	0.36	0.17	0.3	0.4	0.39	0.28	0.18	0.51	0.23	0.03	0.28	0.16	0.07	0.2	0.23	0.44	0.05	0.1	0	0	0.05	5.31	0	0.09	0.02
ENSMMUG00000000292	0.93	0.55	1.34	0.88	0.47	1.47	0.66	1.14	0.43	0.58	1.81	0.58	0.76	1.71	1.52	2.63	0.49	0.36	1.48	1.55	0.97	0.96	1.33	1.96	0.17	0.2	0.59	0.58	0.28	1.45	1.04	0.51	0.06	0.1	0.04	0.02	0	0.08	0	0	0.26	0.26	0.07	0.02	0.02	0.18	0.08	0	0.7
ENSMMUG00000000296	4.13	4.45	4.85	4.35	2.83	2.87	2.54	2.31	3.67	3.01	11.79	10.46	12.85	16.15	13.45	12.52	4.87	4.18	12.03	10.12	13.37	15.47	24.42	18.59	6.03	5.98	7.71	5.98	3.58	5.66	5	4.39	4.71	6.15	7.35	6.8	7.85	8.94	7.71	7.49	18.31	26.43	47.98	46.1	42.73	47.01	43.58	49.31	4.84
ENSMMUG00000000299	0	0.02	0	0.02	0.03	0.07	0.02	0.04	0	0.02	0.03	0	0	0.04	0	0	0	0.18	0.04	0.02	0.14	0.1	0	0	0.09	0.02	0.09	0	0.03	0.17	0.08	0	0.37	0.48	0.13	0.32	0.11	0.28	0.4	0.14	0.02	0.14	0.05	0.11	0.15	0.14	0	0.04	0
ENSMMUG00000000300	0.29	0.34	0.21	0.3	0.14	0.2	0.31	0.43	0.19	0.28	0.39	0.41	0.53	0.35	0.46	0.67	0.22	0.2	0.46	0.69	0.38	0.27	0.41	0.29	0.2	0.15	0.24	0.32	0.3	0.18	0.33	0.4	0.49	0.47	0.41	0.66	0.18	0.27	0.38	0.29	0.31	0.39	0.33	0.36	0.45	0.29	0.4	0.4	0.69
ENSMMUG00000000302	1.18	1.15	1.39	1.19	1.85	1.33	1.21	1.27	2.49	1.82	1.24	1.17	1.34	1.23	1.62	1.27	1.55	1.03	1.38	0.95	1.06	0.91	1.01	1.07	1.3	1.15	1	1.11	1.16	0.86	1.52	1.04	1.67	1.62	1.66	1.96	1.78	1.95	1.92	1.99	1.88	2.14	1.96	1.91	1.99	2.62	2.4	1.99	3.38
ENSMMUG00000000309	0.1	0	0	0.13	0.09	0.16	0	0.02	0	0.06	0.29	0.08	0.26	0.05	0.42	0.04	0.16	0.07	0.41	0.13	0	0.29	0.24	0.58	0.03	0	0.23	0	0.07	0	0.05	0	0	0.03	0	0	0	0.08	0.04	0	0.09	0.12	0.05	0.37	0.1	0.13	0.14	0.06	0
ENSMMUG00000000311	0	0.02	0	0.01	0.07	0.07	0	0.01	0.03	0.06	0.08	0.02	0.06	0	0	0.09	0.05	0.03	0.09	0	0	0.12	0.11	0	0.09	0	0.02	0.06	0	0.13	0.12	0.14	0.02	0.03	0	0	0.02	0.04	0	0.02	0.25	0	0	0	0	0	0	0.03	0.03
ENSMMUG00000000313	0.07	0.06	0.07	0.07	0.05	0.09	0.03	0.06	0.03	0.01	0.06	0.02	0.02	0.01	0.01	0.05	0.02	0.03	0.02	0.01	0.04	0.03	0.02	0.01	0.03	0	0.06	0.08	0.02	0.06	0.05	0.01	0.26	0.12	0.09	0.22	0.16	0.06	0.1	0.11	0.03	0.03	0.02	0.04	0.05	0.02	0.05	0.07	0.05
ENSMMUG00000000320	1.17	1.1	1.28	1.58	1.77	1.1	1.48	1.8	0.66	1.22	1.62	1.8	2.57	1.95	2.4	3.01	0.64	1.11	1.14	1.59	1.55	2.12	1.42	1.69	0.68	0.43	1.23	1.86	1.86	1.95	1.9	1.81	1.06	0.91	1.09	1.76	1.84	1.61	2.38	2.01	1.45	1.3	0.79	1.49	1.86	0.94	1.78	2.13	1.08
ENSMMUG00000000324	0.05	0.15	0.19	0	0	0.14	0.11	0	0.09	0	0.04	0	0.15	0.05	0.1	0.14	0.07	0.18	0.23	0.04	0	0.1	0	0.1	0	0.15	0.04	0	0	0.09	0	0	0.08	0.11	0.03	0	0	0.03	0	0	0	0.09	0.24	0.33	0	0	0.32	0.06	0.09
ENSMMUG00000000326	0.5	0.53	0.73	0.34	0.3	0.16	0.36	0.39	0.75	0.92	1	0.77	0.66	0.53	0.67	0.69	0.9	0.98	0.65	0.8	0.94	0.79	0.99	0.74	0.8	0.85	0.5	0.44	0.47	0.72	0.55	0.66	0.44	0.72	0.4	0.54	0.43	0.33	0.37	0.37	1.09	0.78	0.78	0.51	0.43	0.68	0.88	0.77	0.8
ENSMMUG00000000332	0.5	0.53	0.5	0.61	0.22	0.29	0.21	0.26	0.95	1.04	1.28	0.83	0.99	1.09	0.82	1.2	0.49	0.48	0.86	1.29	0.84	1.5	0.64	0.3	0.79	1.65	1.28	0.88	0.95	1.52	0.62	0.95	0.88	1.11	0.83	1.04	1.08	1.06	1.14	0.92	0.53	0.43	0.6	0.43	0.58	0.84	0.31	0.81	0.85
ENSMMUG00000000337	0	0	0	0	0	0	0	0	0.01	0	0.01	0	0	0	0	0.01	0	0	0.01	0	0	0.01	0	0	0	0	0	0	0	0	0	0	0.04	0.03	0.02	0.01	0.02	0.01	0.01	0	0.01	0.01	0	0	0.01	0.01	0.01	0.01	0
ENSMMUG00000000341	0	0	0.47	0	0	0.06	0	0.15	1.31	0.47	0.98	0.84	0.72	1.18	0.63	0.25	1.68	0.06	0.08	0.17	0.67	0.37	0.6	0.91	1.49	0.61	0.17	0.04	0.06	0.11	0.17	0.2	4.21	4.24	2.02	2.74	3.37	3.14	3.25	3.01	0.85	1.58	0.36	2.32	0.26	0.92	1.52	0.92	1.64
ENSMMUG00000000342	0.03	0.08	0.05	0.02	0.03	0.05	0.02	0.05	0.09	0.09	0.06	0.05	0.08	0.09	0.04	0.05	0.04	0.04	0.06	0.06	0.02	0.09	0.03	0.16	0.05	0.06	0.05	0.02	0.07	0.04	0.04	0.01	0.42	0.82	0.33	0.35	0.37	0.3	0.31	0.35	0.51	0.6	0.32	0.39	0.37	0.25	0.4	0.37	1.01
ENSMMUG00000000344	0.02	0.1	0.05	0.12	0.09	0.07	0.18	0.04	0.05	0.06	0.05	0.08	0	0.03	0.06	0.07	0.06	0.02	0.1	0.01	0.07	0.05	0.03	0.01	0.13	0.09	0.12	0.08	0.04	0.03	0.05	0.03	0.19	0.21	0.49	0.27	0.14	0.04	0.11	0.18	0	0.03	0.06	0.07	0.1	0	0.13	0.06	0.05
ENSMMUG00000000352	0.01	0.01	0.01	0	0.01	0.01	0.03	0.03	0.03	0.02	0.02	0	0	0.09	0.04	0.07	0	0	0.02	0.01	0.01	0.06	0.01	0.05	0.01	0.04	0.04	0.02	0	0.04	0.03	0.04	0.04	0.14	0.05	0.03	0.04	0.01	0.07	0.04	0.01	0.01	0.03	0.03	0.02	0.02	0.15	0.07	0.01
ENSMMUG00000000353	0.15	0	0	0.07	0.03	0.57	0.03	0.25	0.18	0	0.13	0.24	0.23	0.08	0.2	0.05	0.21	0.62	0.49	0.55	0.27	0.11	0.07	0.12	0.23	0.09	0.06	0	0.11	0	0	0	0.24	0.12	0.51	0.64	0.11	0.56	0.18	0.17	0.07	0.14	0.42	0.17	0.12	0.02	0	0.34	0.18
ENSMMUG00000000359	0.59	0.7	1.14	0.79	1.01	0.66	1.2	1.62	0.86	0.32	0.86	0.67	0.8	0.69	1.07	0.9	0.4	0.38	1.38	1.11	1.06	0.55	1.18	0.96	0.58	0.66	1.11	0.85	0.88	0.74	1.36	1.17	1.7	1.72	3.21	1.77	1.74	1.1	1.95	2.04	0.23	0.27	0.52	0.26	0.71	0.26	0.53	0.73	0.33
ENSMMUG00000000368	4.3	5.36	2.67	5.15	5.31	6.86	5.63	6.03	0.14	0.29	0.64	0.57	0.51	0.39	0.36	0.68	0	0.11	0.34	0.37	0.19	0.38	0.13	0.29	0.17	0.59	0.8	2.46	1.98	1.33	1.71	1.51	1.29	1.98	1.62	1.86	2.38	1.65	1.6	1.5	0.51	0.78	0.89	0.98	1.21	0.71	0.78	2.28	1.3
ENSMMUG00000000378	0.18	0.34	0.57	0.31	0.23	0.31	0.57	0.53	0.22	0.15	0.36	0.33	0.24	0.34	0.28	0.37	0.24	0.28	0.4	0.3	0.24	0.6	0.49	0.5	0.87	0.78	1.4	1.22	0.73	1.81	0.98	1.32	0.95	0.98	1.14	1.17	1.23	1.31	1.3	1.41	1.45	1.68	1.92	2.28	2.02	2.52	3.25	2.78	0.94
ENSMMUG00000000384	0	0.14	0.81	0.1	0	0	0.09	0.16	0.31	0.33	0.36	0.23	0.46	0.1	0.28	0.2	0.44	0	0.48	0.24	0.1	0.02	0.08	0.05	0.23	0.32	0.4	0.08	0.13	0	0.18	0.13	0.09	0	0	0	0	0.14	0	0	0.3	0.49	1.21	0.46	0.34	0.45	0.48	0.39	0.28
ENSMMUG00000000392	0	0	0	0	0	0	0	0	0	0	0	0	0	0	0	0	0	0	0	0	0	0	0	0	0	0	0	0	0	0	0	0	0.09	0.02	0.02	0.14	0.04	0	0	0.04	0	0	0	0.01	0	0.17	0	0	0.04
ENSMMUG00000000402	0.94	1.03	1.01	0.85	0.79	0.84	0.82	0.88	0.38	0.51	0.58	0.42	0.78	0.58	0.91	0.6	0.18	0.24	0.59	0.57	0.46	0.53	0.49	0.67	0.62	0.82	0.67	0.79	0.71	0.69	0.99	0.49	5.17	6.37	3.49	3.85	3.86	3.99	4.25	3.77	1.72	2.18	2.14	2.47	2.06	2.08	1.93	2.2	1.06
ENSMMUG00000000404	0.1	0.13	0.18	0.02	0.05	0.03	0.06	0.03	0.48	0.48	0.51	0.23	0.5	0.2	0.26	0.21	0.4	0.41	0.11	0.12	0.28	0.07	0.1	0.21	0.63	0.48	0.15	0	0.02	0.3	0.21	0.1	0.43	0.07	0.01	0.13	0	0.11	0	0	1.01	1.9	1.53	1.07	1.2	1.04	0.35	0.67	2.65
ENSMMUG00000000406	0.12	0.08	0.12	0.07	0.11	0.07	0.01	0.08	0.17	0.17	0.16	0.11	0.16	0.11	0.19	0.08	0.12	0.17	0.06	0.35	0.28	0.03	0.1	0.26	0.17	0.08	0.1	0.15	0	0.17	0.13	0.39	0.4	0.44	0.06	0.33	0.37	0.1	0.15	0.16	0.27	0.51	0.19	0.07	0.41	0.17	0.15	0.19	0.24
ENSMMUG00000000408	0.17	0.11	0.02	0.21	0.29	0.36	0.16	0.19	0.23	0.17	0	0.14	0.03	0.17	0.4	0.09	0.22	0.41	0.16	0.04	0.09	0.04	0.12	0	0.23	0.4	0.17	0.11	0.12	0.33	0.25	0.36	0.14	0.12	0.08	0.11	0.18	0	0.14	0.05	0.29	0.31	0.43	0.12	0.65	0.04	0.17	0.34	0.42
ENSMMUG00000000418	35.15	34.02	31.04	33.97	30.48	30.42	25.22	27.14	32.29	36.2	42.67	26.78	25.7	22.22	21.75	23.01	82.08	94.45	55.41	36	50.41	60.9	65.18	55.82	68.93	51.13	41.96	29.9	56.03	30.99	29.57	45.69	18.67	20.12	28.6	20.1	27.39	18.82	26.85	18.5	49.73	40	42.71	30.88	38.68	36.91	21.94	30.42	41.53
ENSMMUG00000000420	0.01	0	0.05	0	0.01	0	0	0.01	0	0	0.04	0.06	0.45	0.16	0.4	0.22	0	0	0.01	0.02	0.24	0.12	0.15	0.03	0.02	0	0.08	0.05	0.06	0.06	0.03	0.04	0	0	0.02	0.06	0	0.03	0.05	0.03	0.11	0	0.01	0	0.1	0	0	0.05	0.02
ENSMMUG00000000429	0.88	1.35	1.18	0.74	0.32	0.57	0.43	0.6	1.69	1.46	4.28	3.7	4.19	3.94	4.33	5.68	1.29	1.83	2.69	3.22	1.96	1.89	2.29	2.72	1.72	1.73	2.42	1.59	1.02	2.07	1.34	1.75	3.3	3.21	2.8	2.84	3.58	2.95	3.42	3.42	3.01	3.29	5.38	4.32	4.24	6.12	4.65	6.5	2.8
ENSMMUG00000000431	0.1	0.02	0.2	0.08	0.02	0.05	0.04	0.1	0.01	0	0.05	0.01	0	0.02	0.05	0.03	0.18	0.09	0.11	0.06	0.11	0.1	0.08	0.01	0.04	0.02	0.22	0.06	0.01	0.03	0.16	0	0.19	0.18	0.4	0.3	0.27	0.14	0.17	0.33	0.12	0.19	0.24	0.34	0.26	0.4	0.07	0.39	0.23
ENSMMUG00000000433	0.34	0.37	0.61	0.23	0.23	0.28	0.15	0.29	2.21	2.22	2.48	2.27	1.97	1.91	1.59	2	1.59	1.24	1.24	2.07	0.94	1.42	1.47	1.55	1.57	1.31	0.51	0.69	0.5	0.53	0.54	0.46	63.33	82.47	62.73	71.45	66.56	42.88	56.13	53.27	32.36	33.6	23.08	22.06	18.78	24.95	18.48	19.86	13.57
ENSMMUG00000000436	0.12	0	0.02	0.03	0.04	0.08	0.06	0.07	0.05	0.03	0.1	0.02	0	0.06	0.03	0.14	0.04	0.04	0	0	0.07	0.04	0.04	0.03	0.02	0.02	0	0	0.08	0	0.06	0	0.05	0.07	0.05	0.09	0.14	0.14	0.12	0.15	0.02	0.08	0.09	0.04	0	0.06	0.06	0.1	0.02
ENSMMUG00000000438	1.71	1.81	1.84	1.54	1.54	1.55	1.11	1.74	1.23	1.42	0.92	1.24	1.18	1.2	1.32	1.38	1.13	1.22	0.97	1.05	0.79	0.74	0.91	1.33	1.05	1.44	1.14	1.35	0.77	1.09	1.41	1.57	1.49	1.04	1.55	1.75	0.51	1.93	1.94	3.9	9.23	10.53	8.81	7.85	8.72	9.06	10.48	11.04	9.46
ENSMMUG00000000441	0.01	0.05	0	0.02	0.01	0	0.01	0.01	0	0	0	0	0	0	0.05	0.05	0.01	0.01	0.03	0.01	0.1	0	0	0.01	0	0	0	0	0	0	0	0.05	0.02	0	0.03	0	0	0	0.02	0.04	0	0	0	0	0	0	0	0	0
ENSMMUG00000000443	0.82	0.46	0.41	0.51	0.32	0.29	0.5	0.22	0.14	0.13	0.22	0.18	0.35	0.16	0.35	0.24	0.34	0.19	0.18	0.2	0.15	0.32	0.9	0.19	0.32	0.48	0.5	0.33	0.43	0.55	0.81	0.34	1.07	0.8	0.43	0.28	0.56	0.32	0.72	0.37	0.81	0.56	0.45	0.36	0.39	0.46	0.74	0.35	0.55
ENSMMUG00000000467	0.03	0.04	0.02	0.05	0.01	0.03	0.02	0.01	0.02	0.01	0.03	0.07	0.02	0.01	0.01	0.03	0.03	0.01	0.04	0.07	0.03	0.04	0	0.01	0.02	0	0.01	0.01	0.03	0.01	0.01	0.01	0.09	0.02	0.04	0	0.02	0.01	0	0.01	0.07	0.04	0.06	0.05	0.05	0.04	0.02	0	0.03
ENSMMUG00000000468	0.03	0.08	0.02	0.11	0.02	0.03	0.16	0.01	0.03	0.02	0.03	0.04	0.03	0.07	0.18	0.03	0.04	0.04	0.04	0.05	0.1	0.08	0	0.06	0.06	0.09	0.04	0.1	0.06	0.02	0.12	0.1	0.09	0.01	0.09	0.05	0.06	0.03	0.18	0.08	0.02	0.05	0.01	0.04	0.03	0.11	0.07	0.07	0.04
ENSMMUG00000000469	0.07	0.05	0.03	0.08	0.09	0.1	0.04	0.1	0.18	0.03	0.12	0.04	0.11	0.05	0.19	0.06	0.07	0	0.1	0.16	0.06	0.05	0.01	0.11	0.04	0.06	0.07	0.01	0.16	0	0.12	0.1	0.03	0	0.02	0.03	0.01	0.01	0	0.03	0.04	0.07	0.18	0.11	0.01	0.03	0.21	0.04	0.06
ENSMMUG00000000470	0.03	0.03	0	0.01	0.02	0.02	0.04	0.06	0.06	0.17	0	0.01	0.03	0	0.02	0	0.04	0	0.06	0.01	0.01	0.01	0.02	0.03	0.04	0.08	0.1	0.09	0.01	0.06	0.03	0.02	0.03	0.12	0.04	0.19	0.03	0.05	0.03	0.04	0.03	0.04	0.17	0.09	0.01	0.06	0.08	0.03	0
ENSMMUG00000000471	0.02	0.09	0.26	0	0	0.02	0	0.03	0.02	0	0	0	0.02	0.03	0	0	0.02	0.23	0	0	0	0	0	0	0.04	0.02	0	0	0	0.03	0.03	0	0.03	0.04	0	0.02	0	0.02	0.08	0	0.02	0	0	0.01	0	0	0	0	0
ENSMMUG00000000476	0.4	0.37	0.39	0.27	0.38	0.26	0.35	0.31	0.11	0.33	0.43	0.36	0.4	0.58	0.48	0.45	0.4	0.44	0.31	0.58	0.76	0.57	0.33	0.5	0.54	0.39	0.5	0.49	0.4	0.71	0.22	0.3	0.55	0.65	0.42	0.74	0.33	0.58	0.81	0.69	0.58	0.56	1.16	0.92	0.44	0.7	1.53	1.1	0.5
ENSMMUG00000000484	0.27	0.23	0.43	0.13	0.07	0.09	0.07	0.11	1.35	1.17	1.53	1.38	1.22	1.38	2.1	1.8	0.39	0.54	0.75	0.87	0.5	0.78	1.18	0.54	0.25	0.42	0.22	0.32	0.17	0.55	0.3	0.14	0	0.06	0.09	0.12	0	0.08	0.11	0.29	0.08	0.13	0.15	0.13	0.15	0.11	0.23	0.03	1.27
ENSMMUG00000000488	0.06	0.02	0.01	0.06	0.01	0.04	0.04	0.01	0.19	0.23	0.13	0.06	0.05	0.09	0.06	0.02	0.22	0.17	0.05	0.04	0.08	0.05	0	0	0.07	0.1	0.06	0.03	0.03	0.03	0.02	0.03	0.11	0.06	0.09	0.04	0.05	0.04	0.06	0.02	0.13	0.07	0.01	0.04	0.1	0.06	0.02	0.03	0.14
ENSMMUG00000000493	0.41	0.23	0.22	0.23	0.17	0.3	0.46	0.36	0.11	0.21	0.1	0.13	0.12	0.03	0.19	0.09	0.05	0.24	0.12	0.15	0.25	0.09	0.13	0.16	0.13	0.2	0.14	0.13	0.51	0.53	0.37	0.5	0.21	0.12	0.45	0.3	0.18	0.12	0.16	0.34	1.4	0.81	1.02	0.69	0.86	1.75	1.21	1	0.76
ENSMMUG00000000497	0.33	0.12	0.15	0.09	0.04	0.07	0.11	0.07	0.11	0.28	0.08	0.05	0.02	0.03	0	0.04	0.09	0.13	0.23	0.08	0.05	0.08	0	0.11	0.09	0.13	0.07	0.27	0.11	0.05	0.24	0.06	0.49	0.24	0.24	0.24	0.23	0.11	0.26	0.34	0.17	0.28	0.23	0.18	0.09	0.17	0.07	0.09	0.06
ENSMMUG00000000500	0.1	0.07	0.15	0.06	0.05	0.04	0.04	0.04	1.48	1.91	1.04	0.47	0.51	0.22	0.36	0.23	0.98	0.52	0.23	0.27	0.2	0.07	0.41	0.13	0.71	0.34	0.14	0.07	0.2	0.09	0.02	0.04	0.58	0.45	0.32	0.63	0.47	0.19	0.32	1.84	1.05	0.57	0.41	0.41	0.33	0.44	0.52	0.46	2.93
ENSMMUG00000000501	0	0.04	0.02	0.04	0.09	0.02	0	0.1	0.12	0.07	0.09	0.04	0	0.1	0.1	0	0.17	0	0	0.07	0.03	0	0	0.05	0	0.06	0.04	0	0	0.09	0.2	0	0	0.06	0.87	0.23	0.04	0.07	0.16	0.26	0.05	0.07	0	0.11	0.21	0.03	0.32	0	0.16
ENSMMUG00000000504	0.43	0.38	0.54	0.4	0.29	0.19	0.34	0.28	0.15	0.32	0.32	0.34	0.12	0.18	0.23	0.31	0.23	0.21	0.38	0.28	0.17	0.22	0.24	0.27	0.38	0.26	0.5	0.44	0.33	0.4	0.4	0.51	0.75	0.73	1.09	1	0.74	0.92	0.8	0.88	0.84	0.89	0.89	0.93	0.49	0.86	0.94	0.67	1.59
ENSMMUG00000000506	0.01	0.03	0.03	0.04	0.05	0.08	0.06	0.04	0.05	0.05	0.12	0.04	0.14	0.03	0.04	0.1	0.04	0.01	0.04	0.02	0.06	0.03	0.08	0.05	0.05	0.04	0.24	0.16	0.21	0.17	0.08	0.08	0.43	0.17	0.11	0.16	0.1	0.1	0.12	0.09	0.01	0.03	0.01	0.02	0.09	0.02	0.07	0.02	0.02
ENSMMUG00000000507	458.8	527.63	438.23	321.85	225.62	219.76	246.17	242.28	480.33	578.34	391.68	383.04	280.6	276.98	305.34	242.77	564.64	496.85	322.46	337.53	266.57	253.49	323.25	283.09	490.71	440.97	377.46	361.28	366.16	272.38	303.95	323.33	967.81	989.28	944.72	832.76	835.69	709.28	731.84	803.99	487.38	501.87	342.61	337.77	240.6	257.53	288.34	239.87	503.78
ENSMMUG00000000514	0.07	0.29	0.16	0.39	0.56	0.21	0.17	0.18	0.17	0.23	0.37	0.06	0.28	0.07	0.34	0.1	0.41	0.4	0.07	0.13	0.19	0.07	0.07	0.15	0.09	0.32	0.23	0.18	0.26	0.38	0.28	0.55	0.36	0.37	0.04	0.28	0.12	0.15	0.33	0.48	0.07	0.03	0.1	0.12	0.11	0	0	0.08	0.14
ENSMMUG00000000519	0.21	0.09	0.09	0.05	0.03	0.03	0.02	0.03	0.01	0.05	0.04	0.05	0.06	0.02	0.01	0.04	0.03	0.04	0	0.02	0.06	0.14	0	0	0	0.06	0.1	0	0.03	0	0.02	0	0.03	0.15	0.06	0	0.04	0.04	0.06	0.05	0.06	0.14	0.08	0.11	0.04	0.3	0.06	0.29	0.12
ENSMMUG00000000524	0.13	0.02	0.09	0.1	0.09	0.1	0.1	0.16	0.01	0	0.02	0.01	0.01	0	0.07	0.01	0.11	0.05	0	0.02	0.02	0.06	0.16	0.05	0.55	0.06	0.18	0.07	0.11	0.17	0.32	0.11	32.49	33.56	11.39	14.16	14.6	19.05	9.32	12.52	2.87	2.63	2.14	2.39	1.36	2.01	2.25	1.65	1.57
ENSMMUG00000000529	0.81	0.41	0.72	0.69	0.4	0.29	0.52	0.26	1.01	1.49	1.77	1.89	1.65	1.68	1.6	2.01	0.52	1.14	0.86	2.75	1.37	0.67	0.86	0.73	0.7	0.69	0.52	0.66	0.99	1.19	0.48	0.38	1.34	1.18	1.37	0.78	0.7	0.84	0.41	0.71	2.5	2.36	2.45	2.55	2.14	2.66	1.65	1.66	3.13
ENSMMUG00000000531	0.01	0.01	0	0.03	0	0	0	0	0	0	0	0	0	0	0	0	0	0	0	0	0	0	0	0	0	0.03	0	0	0.03	0	0	0	0	0	0	0	0	0	0	0.03	0.11	0.17	0.04	0.02	0.02	0.07	0.13	0	0.11
ENSMMUG00000000540	0.01	0.02	0.02	0.02	0.01	0	0.01	0.03	0.01	0.03	0.02	0.07	0.08	0	0.01	0.06	0.02	0.03	0.02	0.11	0.03	0.01	0.03	0	0.03	0	0.01	0.03	0	0.04	0.05	0.01	0.52	0.28	0.68	0.55	0.64	0.89	0.48	0.19	0.11	0.02	0.08	0.17	0.19	0.14	0.16	0.04	0.11
ENSMMUG00000000543	0.02	0.05	0	0	0.01	0.01	0.05	0	0.01	0	0.02	0	0.04	0	0	0.02	0	0.02	0.04	0.08	0	0	0	0.03	0.05	0	0	0.06	0	0	0	0	0	0.01	0	0.05	0	0	0	0	0	0	0	0	0.01	0	0	0	0
ENSMMUG00000000544	1.35	1	1.52	0.76	1.27	1.66	2.74	1.81	2.9	3.1	5.86	4.64	5.87	7.39	6.18	6.83	2.01	2.61	4.52	4.19	2.65	4.03	3.1	1.79	1.24	1.33	0.9	0.87	0.64	1.65	1.9	1.05	1.9	2.64	1.36	1.98	2.53	1.49	2.44	3.06	2.45	2.34	1.86	1.45	3.03	3.56	2.4	3.92	2.54
ENSMMUG00000000545	0.38	0.34	0.51	0.36	0.2	0.6	0.13	0.4	0.33	0.47	0.65	0.64	0.62	1.25	0.65	0.63	0.45	0.3	0.4	0.55	0.36	1.05	0.48	0.5	0.42	0.32	0.27	0.51	0.29	0.82	0.23	0.39	0.47	0.3	0.34	0.68	0.25	1.12	0.27	0.41	0.77	0.6	0.72	1.05	0.64	1.56	0.88	1.18	0.72
ENSMMUG00000000546	0.49	0.39	0.38	0.55	0.23	0.24	0.47	0.37	0.32	0.67	0.25	0.66	0.49	0.42	0.62	0.53	0.62	0.43	0.53	0.61	0.57	0.37	0.64	0.46	0.51	0.55	0.43	0.6	0.33	0.61	0.53	0.63	0.51	0.45	0.31	0.39	0.38	0.47	0.47	0.43	0.68	0.52	0.74	0.41	0.68	1.4	0.62	0.5	0.58
ENSMMUG00000000547	0.56	0.84	0.67	0.71	0.71	0.56	0.77	0.87	0.43	0.44	0.58	0.39	0.62	0.44	1.09	0.79	0.38	0.39	0.48	0.47	0.41	0.58	0.28	1.02	0.85	0.57	0.57	0.72	0.38	0.69	0.74	0.63	1.27	1.09	1.82	1.43	1.46	0.96	1.47	1.44	0.43	0.89	1.07	0.76	1.32	0.78	1.06	0.93	0.31
ENSMMUG00000000549	0.09	0.07	0.04	0.02	0.12	0.1	0.02	0.01	0.04	0.12	0.01	0.12	0.06	0.01	0.03	0.08	0	0.05	0.01	0.03	0	0.01	0.01	0.08	0.02	0.05	0.01	0.11	0.03	0.05	0.04	0	0	0.01	0.01	0.01	0	0.03	0.01	0	0.1	0.08	0.01	0.07	0.01	0.14	0.06	0.03	0.01
ENSMMUG00000000554	0.09	0.07	0.07	0.09	0.05	0.06	0.04	0.07	0.14	0.14	0.14	0.13	0.17	0.12	0.18	0.14	0.11	0.15	0.07	0.13	0.18	0.15	0.19	0.12	0.15	0.15	0.09	0.07	0.1	0.14	0.09	0.07	0.06	0.03	0.02	0.04	0.05	0.04	0.03	0.07	0.23	0.33	0.27	0.22	0.23	0.45	0.22	0.36	0.21
ENSMMUG00000000555	0	0.01	0.05	0.07	0	0.04	0.01	0.05	0	0.05	0.08	0	0.17	0.03	0	0.09	0	0.07	0.01	0	0.03	0	0	0.03	0.08	0.06	0.25	0.12	0.2	0.13	0.12	0.09	2.38	1.54	0.23	1.12	0.2	0.36	0.13	0.39	0.03	0	0	0.03	0	0.03	0	0	0
ENSMMUG00000000560	17.29	17.11	20.35	17.78	15.73	16.93	13.3	17.1	17.51	24.36	25.33	23.03	26.6	27.41	21.97	23.62	18.26	16.3	17.83	22.03	21.26	20.46	19.24	19.83	14.36	15.45	36.26	28.59	28.2	27.02	22.45	24.46	37.71	31.01	32.38	34.94	26.83	35.14	29.45	32.68	23.08	18.02	18.62	21.25	21.95	25.13	21.86	20.72	24.65
ENSMMUG00000000566	0.05	0.09	0.05	0.08	0.03	0.06	0.19	0.06	0.06	0.03	0.08	0.08	0.02	0.05	0.04	0.09	0.06	0.11	0.07	0.04	0.01	0.05	0.05	0.07	0.1	0.05	0.16	0.05	0.1	0	0.05	0.06	0.02	0.03	0.04	0.03	0.04	0.15	0.07	0.06	0.07	0.03	0.05	0.07	0.01	0.02	0.03	0.05	0.06
ENSMMUG00000000568	0	0.01	0.01	0	0.01	0.01	0.01	0.03	0.07	0	0	0.03	0.02	0.07	0.04	0.02	0	0	0.03	0.07	0.04	0.01	0	0	0.03	0	0.08	0	0.01	0.06	0.01	0.08	0.16	0.25	0.06	0.26	0.02	0.2	0.33	0.03	0	0	0	0.02	0	0	0.01	0.01	0
ENSMMUG00000000576	0.28	0.31	0.3	0.22	0.25	0.14	0.18	0.19	0.56	0.6	0.74	0.49	0.43	0.42	0.32	0.57	0.62	0.46	0.45	0.33	0.4	0.21	0.32	0.38	0.81	0.66	0.26	0.26	0.34	0.26	0.29	0.21	13.09	9.96	11.69	8.54	8.55	8.83	8.81	9.94	2.51	4.19	2.71	2.27	2.17	2.56	1.97	2.21	1.89
ENSMMUG00000000579	0.01	0.05	0	0	0.11	0.01	0.04	0.02	0.12	0.01	0.03	0	0.01	0.05	0.04	0.07	0.1	0.09	0.01	0.07	0.11	0.09	0	0.02	0.06	0.05	0.07	0.04	0.08	0.03	0.09	0	0.1	0.07	0	0.07	0.04	0	0.02	0.09	0.09	0.11	0.05	0.01	0.04	0.02	0.04	0	0.09
ENSMMUG00000000580	0.01	0.03	0.01	0.02	0.01	0.01	0.01	0.02	0	0.03	0	0.01	0	0	0.01	0.01	0	0.01	0	0	0	0	0	0	0.01	0.01	0.02	0.02	0.01	0.02	0.01	0.05	0.08	0.06	0.03	0.03	0.05	0.03	0.04	0.02	0.01	0.03	0	0.01	0.01	0.02	0	0.02	0.02
ENSMMUG00000000586	1.74	1.26	1.11	4.14	3.25	2.89	2.01	2.86	2.29	3.62	2.67	1.68	4.85	5.01	5.37	4.58	2.86	1.45	1.81	4.11	3.55	3.69	5.75	4.05	3.4	3.3	4.39	6.37	6.74	2.64	7.16	5.21	3.52	4.35	4.32	9.84	6.95	10.37	9.09	8.32	5.9	2.46	3.85	5.2	3.73	6.42	8.34	5.67	5.32
ENSMMUG00000000592	0	0	0	0	0	0	0	0.02	0.02	0.1	0	0	0.17	0	0.05	0	0.02	0	0.05	0.27	0.04	0	0	0.04	0	0	0	0	0	0.07	0	0	0	0	0	0	0	0	0.03	0	0.07	0	0	0.02	0.04	0	0	0.04	0
ENSMMUG00000000595	1.92	2.78	1.87	2.29	2.47	2.75	2.56	2.69	0.56	0.66	1.04	0.71	1.44	1.27	0.94	1.26	0.52	0.44	0.84	0.56	0.39	0.86	0.27	0.34	0.86	1.06	2.11	1.96	2.75	1.68	2.45	2.3	3.29	3.34	2.78	3.26	2.84	2.3	4.83	3.28	1.52	1.67	1.91	1.52	2.54	3.05	2.24	2.76	2.03
ENSMMUG00000000604	0.73	0.59	1.21	1.18	0.87	1.33	1.15	1.25	1.47	0.94	1.49	1.75	1.41	1.63	1.99	1.97	0.76	0.72	2.22	1.23	1.03	1.32	1.85	1.95	1.46	2.09	1.06	1	0.38	1.1	1.22	0.34	1.88	2.09	2.72	4.05	3.09	4.6	4.55	4.13	1.9	1.98	2.27	2.75	2.17	1.93	2.22	2.91	1.1
ENSMMUG00000000610	1.2	1.46	0.83	7.88	0.86	0.71	0.68	0.46	1.45	1.03	1.69	11.24	1.63	1.63	1.72	1.51	1.49	1.72	1.99	8.51	1.98	1.74	1.97	1.57	1.32	1.5	1.5	5.1	1.54	1.43	1.29	0.89	1.78	2.48	2.32	5.47	3.31	2.18	3.21	2.11	1.9	4.7	2.5	13.43	2.95	2.45	2.21	1.58	1.41
ENSMMUG00000000614	0.87	0.73	0.76	0.74	1.28	1.15	1.35	0.67	0.98	0.56	0.65	0.77	1.18	0.78	0.68	0.81	0.87	1	0.87	0.9	0.95	0.83	0.86	0.69	0.9	0.81	0.94	0.8	0.71	0.35	1.34	0.75	2.51	3.96	5.17	3.98	4.51	3.45	3.25	2.84	1.14	1.22	1.81	1.35	1.5	1.86	1.46	1.44	1.37
ENSMMUG00000000619	0	0	0	0	0	0	0	0	0	0	0	0	0	0	0	0	0	0	0	0	0	0	0	0	0	0	0	0	0	0	0	0	0	0	0	0	0.05	0	0	0	0	0	0.03	0.04	0	0	0.03	0.15	0.06
ENSMMUG00000000621	0	0.02	0.01	0	0.01	0	0	0.01	0	0.02	0	0	0.05	0.05	0.01	0.02	0.03	0	0.1	0.01	0	0	0.02	0	0.01	0	0	0	0.01	0.1	0.05	0.02	0	0.04	0.01	0.08	0.04	0	0.08	0.03	0.02	0.03	0	0	0.02	0	0.04	0.01	0.03
ENSMMUG00000000629	0.08	0.01	0.09	0.01	0.02	0.03	0	0.03	0	0.01	0	0	0.11	0	0	0	0.03	0	0.12	0.03	0.02	0.04	0.01	0	0.08	0.03	0.01	0.02	0.14	0	0	0	0.27	0.17	0.22	0.15	0.14	0.1	0.23	0.2	0.33	0.04	0.07	0.03	0.12	0	0.03	0.05	0.06
ENSMMUG00000000638	0.13	0.2	0.15	0.12	0.09	0.06	0.07	0.12	0.2	0.21	0.14	0.32	0.24	0.2	0.25	0.33	0.16	0.07	0.38	0.23	0.24	0.13	0.19	0.41	0.25	0.14	0.52	0.23	0.28	0.34	0.19	0.37	0.17	0.15	0.32	0.22	0.1	0.06	0.16	0.2	0.34	0.09	0.47	0.37	0.47	0.19	0.28	0.21	0.29
ENSMMUG00000000639	151.81	160.29	163.86	188.59	209.07	166.05	213.98	218.27	128.21	113.21	244.44	130.57	171.81	211.65	162.77	132.59	177.64	140.16	312.85	148.97	220.76	226.71	390.52	278.53	105.65	93.06	155.73	174.65	222.86	152.05	194.9	162.15	50.64	41.94	97.83	58.7	96.17	88.91	79.89	92.76	133.27	112.99	184.29	171.55	145.99	196.39	228.23	194.37	133.41
ENSMMUG00000000640	0	0	0	0.01	0.05	0.03	0.04	0.05	0	0.05	0	0	0	0	0	0	0.03	0.04	0.05	0.02	0	0.07	0	0	0	0.02	0	0.02	0.02	0	0.03	0	0.07	0	0.05	0	0.02	0.02	0.02	0.02	0	0.01	0	0.01	0	0	0	0	0.03
ENSMMUG00000000651	0.12	0.17	0.51	0.16	0.05	0.08	0.08	0.09	0.58	0.36	0.54	0.45	0.45	0.43	0.47	0.34	0.35	0.23	0.41	0.71	0.28	0.24	0.31	0.5	0.76	0.67	0.27	0.39	0.25	0.47	0.23	0.65	0.08	0.09	0.08	0.1	0.06	0.07	0.06	0.11	3.7	3.35	4.43	3.62	3.51	3.73	3.5	3.18	1.97
ENSMMUG00000000653	1233.63	1072.9	1908.58	1053.21	726.4	568.52	855.68	905.69	2270.29	2553.63	2740.71	2227.37	2311.72	2166.07	2662.41	2202.72	2055.31	1478.3	1790.13	1939.71	2002.05	1347.17	2120.97	1972.83	1876.35	1727.71	2004.98	1369.72	1013.62	1439.89	1290.71	1392.5	765.84	580.13	587.16	645.09	581.82	575.27	682.92	618.02	1887.13	1784.27	2000.76	2122.68	1730.45	1614.85	2262.47	1743.82	2922.9
ENSMMUG00000000654	0.25	0.41	0.22	0.21	0.16	0.3	0.22	0.12	0.27	0.17	0.11	0.17	0.13	0.3	0.3	0.25	0.22	0.15	0.1	0.2	0.3	0.27	0.22	0.35	0.14	0.41	0.08	0.23	0.05	0.2	0.34	0.19	0.1	0.14	0.07	0.12	0.25	0.17	0.21	0.14	0.29	0.24	0.29	0.14	0.27	0.51	0.43	0.22	0.27
ENSMMUG00000000657	0.01	0	0.03	0.07	0.02	0.05	0.02	0	0.02	0	0.02	0.03	0.03	0.02	0.03	0	0.04	0	0.02	0.03	0	0.03	0.04	0	0.02	0.01	0.02	0	0.01	0.02	0.02	0.04	0	0.02	0	0.01	0.02	0	0	0	0	0.01	0.13	0.03	0	0.01	0.03	0	0.01
ENSMMUG00000000658	0.2	0.18	0.24	0.13	0.15	0.16	0.14	0.11	0.05	0.05	0.1	0.08	0.09	0.05	0.11	0.15	0.02	0.04	0.08	0.02	0.1	0.06	0.09	0.1	0.15	0.1	0.16	0.18	0.22	0.4	0.19	0.14	0.25	0.25	0.23	0.26	0.29	0.22	0.28	0.25	0.05	0.04	0.08	0.05	0.05	0.06	0.07	0.03	0.04
ENSMMUG00000000660	0	0.01	0	0	0.03	0	0.01	0	0	0.01	0.02	0.02	0.02	0	0.03	0	0	0	0.01	0	0	0	0	0.01	0	0	0.02	0.02	0.03	0	0	0	0.02	0.01	0.01	0.01	0.05	0	0.01	0.01	0	0	0	0.02	0.04	0	0	0	0.01
ENSMMUG00000000662	0.01	0.01	0.01	0	0.01	0.01	0	0	0	0.01	0.01	0.02	0.01	0.01	0	0	0.01	0	0.04	0	0	0.02	0	0.01	0	0	0.04	0	0	0.01	0.02	0.08	0.82	0.81	0.76	0.84	0.58	0.59	0.84	1.19	0.98	0.85	0.9	0.88	1.16	1.81	1.07	0.86	1.24
ENSMMUG00000000669	5.02	6.64	11.06	6.11	4.04	4.31	10.57	7.85	0.64	0.62	3.67	1.86	3.04	5.2	3.75	4.17	2.69	2.77	7.6	3.68	6.52	10.24	16.68	12.47	16.12	15.47	45.48	28.09	27.34	42.17	25.79	37.68	8.5	6.69	10.39	12.2	14.23	15.38	13.18	12.76	5.92	4.95	15.47	20.57	11.74	17.23	30.12	19.18	1.87
ENSMMUG00000000672	0.11	0.03	0.19	0.04	0.02	0.05	0.01	0.03	0.05	0.05	0.1	0.1	0.02	0.05	0.11	0.05	0.1	0.02	0.05	0.05	0	0.29	0.05	0.01	0.16	0.03	0.13	0.05	0.06	0.06	0.13	0.01	0.23	0.11	0.11	0.13	0.09	0.13	0.09	0.05	0.07	0.06	0.13	0.09	0.03	0.1	0.1	0.08	0.16
ENSMMUG00000000680	0.43	0.15	0.24	0.15	0.23	0.33	0.34	0.28	0.56	1.07	0.89	1.07	0.22	0.44	0.38	0.36	1.34	0.7	1.23	1.58	0.43	0.82	0.68	0.53	0.7	0.31	0.37	0.15	0.15	0.31	0.42	0.33	0.62	0.73	0.96	1.01	0.8	0.89	1.25	1.12	1.04	0.52	0.5	0.42	0.37	0.48	0.51	0.44	1.02
ENSMMUG00000000683	3.47	2.67	4.98	1.5	0.43	0.7	0.84	1.14	18.03	18.82	9.74	12.54	7.14	10.01	7.82	7.33	10.7	7.99	4.74	9.01	3.38	3.26	4.38	3.06	4.12	5.72	2.78	2.92	2.1	4.88	2.93	1.8	0.87	1.37	0.8	1.18	0.86	0.78	0.74	1.04	4.8	5.46	2.1	2.62	2.27	2.79	2.29	2.32	16.6
ENSMMUG00000000685	0	0	0	0.03	0.01	0	0	0	0.02	0	0.02	0.07	0.04	0.03	0.08	0.02	0	0.04	0.18	0	0.02	0.01	0	0	0.04	0	0	0	0	0	0.06	0	0.05	0	0	0	0	0	0	0	0	0.08	0	0.02	0	0.1	0.03	0.03	0
ENSMMUG00000000686	0.08	0.15	0.18	0.04	0.06	0.03	0.02	0.02	0.76	0.86	0.66	0.5	0.32	0.34	0.26	0.58	0.52	0.49	0.17	0.37	0.14	0.26	0.03	0.28	0.39	0.14	0.06	0.1	0.02	0.14	0.09	0.04	0.07	0.02	0.04	0.06	0	0	0.02	0.03	0.91	0.54	0.42	0.46	0.19	0.22	0.29	0.42	1.31
ENSMMUG00000000687	0.18	0.08	0.18	0.44	0.12	0.42	0.33	0.29	0.08	0.06	0.25	0.33	0.56	0.18	0.93	0.86	0.08	0.02	0.16	0.3	0.38	0.59	1.04	0.46	0.12	0.12	0.26	0.19	0.29	0.27	0.43	0.22	0.15	0.09	0.18	0.08	0.11	0.19	0.09	0.19	0.23	0.24	0.69	0.57	0.94	1.52	1.51	1.2	0.22
ENSMMUG00000000688	0.01	0.02	0	0.02	0.02	0.02	0.07	0.01	0.14	0.16	0.02	0	0	0	0.01	0.04	0.01	0.04	0.02	0.1	0.04	0	0.01	0.02	0.06	0.05	0.06	0.03	0.04	0.04	0.04	0.02	0.11	0.05	0.15	0.05	0.02	0.03	0.02	0.07	0.09	0.09	0.1	0.05	0.2	0.06	0.01	0.05	0.42
ENSMMUG00000000692	0.69	0.72	0.35	0.54	0.51	0.43	0.42	0.61	0.42	0.18	0.65	0.68	0.69	0.63	0.76	0.85	0.56	0.26	0.7	0.54	0.57	0.76	0.84	0.53	0.43	0.6	0.58	0.89	1.06	1.17	1.04	0.93	14.85	9.96	12.83	12.63	10.83	10.17	10.92	14.72	7.88	10.6	20.28	19.33	13.14	18.08	18.03	20.85	6.17
ENSMMUG00000000703	0	0.01	0.01	0	0.01	0	0.02	0	0	0	0	0.01	0	0	0.01	0.02	0.02	0	0	0.02	0	0	0.01	0	0	0.02	0.01	0	0	0.01	0.01	0	0.01	0	0	0.02	0.01	0.01	0.01	0.01	0	0.01	0.06	0	0	0.01	0	0.02	0
ENSMMUG00000000711	0.22	0.06	0.2	0.16	0.15	0.24	0.14	0.17	0.43	0.54	0.51	0.37	0.46	0.47	0.42	0.55	0.51	0.33	0.31	0.26	0.18	0.22	0.15	0.29	0.45	0.4	0.2	0.22	0.06	0.42	0.05	0.23	0.46	0.28	0.58	0.63	0.17	0.99	0.25	0.39	1.35	0.67	0.5	0.49	0.4	0.79	0.52	0.69	0.89
ENSMMUG00000000719	0.02	0.02	0.07	0.16	0.06	0.02	0.02	0.15	0.12	0.2	0	0.1	0.04	0.05	0.02	0.02	0.02	0.01	0.05	0.09	0.04	0.08	0.02	0.05	0.09	0.09	0.08	0.08	0.04	0.29	0.07	0.12	0.78	0.71	0.76	0.62	0.58	0.81	0.55	0.68	0.13	0.19	0.11	0.37	0.16	0.12	0.3	0.07	0.2
ENSMMUG00000000720	0.06	0.15	0.2	0.12	0.06	0.08	0.1	0.17	0.02	0.03	0.16	0.45	0.19	0.23	0.4	0.36	0.15	0.04	0.09	0.45	0.24	0.18	0.33	0.51	0.11	0.12	0.32	0.16	0.28	0.52	0.34	0.38	0	0.02	0.05	0.03	0.05	0.03	0.01	0.05	0.26	0.51	0.55	1.23	0.72	0.36	0.69	1.09	0.28
ENSMMUG00000000723	0	0	0	0	0	0	0	0	0	0	0	0	0	0	0	0	0	0	0	0	0	0	0	0	0	0	0	0	0	0	0	0	1.96	0.91	1.69	0.51	0.35	2.1	1.11	1.4	1.26	1.6	1.47	2.04	1.82	2.21	0.93	1.22	1.76
ENSMMUG00000000724	0.03	0.01	0.03	0.03	0.01	0	0.02	0.02	0.04	0	0.05	0.02	0.02	0.02	0	0.03	0.03	0	0.02	0.03	0.04	0.09	0.03	0	0.02	0.01	0.08	0.1	0.04	0.02	0.06	0.02	0	0.02	0.07	0.07	0.05	0.03	0.02	0.04	0.04	0	0	0.03	0.01	0	0.03	0.02	0.01
ENSMMUG00000000729	1.11	0.83	0.89	0.96	0.54	0.78	1.02	1.11	0.62	1.07	2.49	1.58	1.68	2.2	2.46	2.55	0.87	0.82	1.2	1.4	1.43	1.44	1.48	0.89	1.28	0.55	1.23	1.4	0.88	1.47	1.01	1.17	2.42	2.33	2.23	2.73	2.42	2.93	2.7	3.54	1.78	1.27	1.79	1.56	2.17	1.96	2.35	2.22	1.74
ENSMMUG00000000730	0.02	0.01	0.02	0.01	0.01	0.02	0.01	0.01	0.01	0.01	0.01	0	0.02	0.01	0.02	0.01	0.02	0.01	0.02	0.01	0.02	0.03	0	0	0	0.01	0.03	0.01	0	0.01	0.01	0.02	0.02	0.01	0.03	0.02	0.01	0.01	0.01	0.02	0.01	0.02	0	0.02	0	0.01	0.03	0	0.01
ENSMMUG00000000731	1.07	1.12	3.47	0.69	0.46	0.54	1.25	1	4.8	7.47	17.43	7.31	14.37	12.46	12.16	18.33	2.53	4.19	7.66	7.01	2.35	3.57	2.25	1.78	1.06	2.5	4.75	0.7	1.14	1.93	1.17	1.65	4.79	8.25	5.52	4.07	6.6	3.33	4.42	9.31	4.18	3.8	7.01	2.18	5.91	8.34	4.35	7.8	4.72
ENSMMUG00000000732	0.01	0.01	0.02	0.01	0.02	0.01	0	0.03	0.01	0.01	0.01	0.02	0.03	0	0.04	0.02	0.01	0	0	0.02	0.01	0.03	0.07	0.02	0.01	0.03	0.04	0	0.02	0.04	0.02	0.04	0.02	0.01	0.01	0.02	0.01	0.02	0.02	0.02	0	0	0	0	0.02	0.03	0.01	0.03	0.01
ENSMMUG00000000733	0.02	0.03	0.05	0.03	0	0.03	0.12	0.09	0.04	0.05	0	0	0.02	0.02	0.05	0.09	0.04	0	0.05	0.06	0.04	0	0.03	0.02	0.02	0.04	0	0	0.06	0	0.06	0.02	0.03	0.02	0.01	0.04	0.02	0.04	0.06	0.03	0.05	0.07	0	0.01	0.01	0.02	0.01	0.03	0.03
ENSMMUG00000000734	0.07	0	0.01	0.01	0.03	0.01	0.04	0.03	0.02	0.03	0.04	0	0.08	0	0.06	0	0.01	0	0	0	0.01	0.04	0	0	0	0	0.07	0	0.06	0	0	0	0	0.06	0.01	0.03	0.1	0.05	0.03	0.03	0.04	0	0	0.01	0.15	0	0.05	0.02	0.03
ENSMMUG00000000742	0.09	0.09	0.03	0.05	0.07	0.02	0.03	0.1	0.11	0.11	0.09	0.06	0.11	0.08	0.08	0.12	0.07	0.05	0.07	0.03	0.04	0.01	0	0.03	0.08	0.04	0.07	0.04	0.04	0.12	0.1	0.08	0.03	0.11	0.04	0.07	0.06	0.05	0.09	0.08	0.07	0.2	0.05	0.03	0.07	0.11	0.06	0.06	0.25
ENSMMUG00000000743	0.01	0.01	0	0	0.04	0.01	0.03	0	0.09	0.03	0.02	0.01	0	0.01	0.1	0.03	0	0	0.03	0	0	0	0	0.01	0.02	0.01	0.02	0	0.02	0	0.05	0	0.01	0.01	0.01	0	0	0.02	0.04	0.01	0.03	0.02	0.02	0.05	0.03	0.02	0.12	0.09	0.01
ENSMMUG00000000744	0	0	0	0.01	0	0.02	0.01	0	0	0	0	0.04	0	0	0	0	0.01	0	0	0	0	0	0	0	0	0	0.01	0	0	0	0	0	0	0.02	0.04	0.01	0.01	0.04	0.02	0.01	0.01	0.01	0	0.01	0	0.01	0	0.02	0
ENSMMUG00000000749	1.07	1.12	0.56	1.29	0.8	1.43	1.2	1.83	0.16	0.14	0.36	0.25	0.71	0.71	0.86	1.93	0.1	0.06	0.65	0.2	0.51	1.03	1.05	0.81	0.66	0.71	1.36	1.12	1.08	1.76	1.24	1.85	0.37	0.41	0.5	0.58	0.53	0.87	0.6	1.43	0.3	0.22	0.35	0.29	0.44	1.18	0.69	1.21	0.19
ENSMMUG00000000752	0.02	0.04	0.07	0.04	0.02	0.02	0.02	0.02	0.02	0.02	0.03	0.03	0.05	0.05	0	0.03	0.05	0.03	0.03	0	0	0	0	0	0.02	0.01	0	0.04	0.01	0.03	0.02	0	0.31	0.23	0.17	0.18	0.07	0.02	0.03	0.07	0.01	0.18	0.05	0.09	0.12	0.04	0.1	0.19	0.1
ENSMMUG00000000753	0.04	0.06	0.09	0.06	0.15	0.09	0.09	0.11	0.08	0.06	0.04	0.09	0.02	0.16	0.09	0.14	0.03	0	0.09	0.09	0.01	0.04	0.03	0.07	0.07	0.08	0.13	0.02	0.04	0.09	0.13	0.08	0.21	0.16	0.16	0.07	0.09	0.07	0.08	0.1	0.07	0.14	0.1	0.22	0.05	0.12	0.07	0.11	0.05
ENSMMUG00000000755	0	0	0.03	0	0.04	0.07	0.17	0.04	0	0	0	0.02	0.01	0.09	0.02	0.01	0	0	0.01	0	0.01	0.05	0	0.03	0	0.03	0.06	0.02	0.04	0.04	0.07	0.06	0.07	0.02	0.02	0.06	0.04	0.06	0.14	0.1	0	0.01	0.01	0.02	0	0	0.05	0.01	0
ENSMMUG00000000758	1.28	1.49	1.48	1.03	0.8	1.05	2.25	2.77	0.77	0.7	1.59	1.05	1.43	1.87	1.74	2.29	0.73	0.75	1.79	1.24	1.41	1.97	2.5	3.14	2.96	3.06	4.36	3.83	3.43	8.76	4.7	8.38	2.88	3.09	5.5	5.82	5.16	7.24	10.33	8.72	2.25	1.87	2.5	3.63	3.07	4.08	5.16	5.77	1.62
ENSMMUG00000000774	0	0	0	0.03	0	0.01	0	0	0	0	0	0.02	0	0.06	0	0	0	0	0	0	0	0.03	0	0	0	0.02	0.02	0.02	0	0	0	0	0	0.01	0.01	0	0	0	0.03	0	0.05	0.02	0	0	0.01	0	0	0	0
ENSMMUG00000000776	3.68	3.7	7.77	8.04	7.34	6.48	4.83	6.1	8.32	7.96	10.49	9.78	11.34	9.18	8.53	8.73	6.71	5.84	7.9	9.21	9.22	7.65	8.59	9.28	5.46	4.6	4.43	3.25	3.38	3.1	3.7	3.07	0.87	1.18	0.74	0.47	0.55	0.62	0.56	0.44	43.3	51.03	46.33	43.01	39.23	47.83	38.03	38.79	22.53
ENSMMUG00000000780	0.03	0.01	0	0	0.01	0	0.03	0	0.01	0	0	0.03	0	0.02	0	0	0.09	0.11	0	0	0.01	0.03	0.01	0.01	0.02	0.08	0.03	0	0.03	0	0	0.03	0	0.04	0.01	0.01	0.01	0.01	0.01	0	0	0.05	0.04	0.03	0.01	0.06	0.01	0.05	0.1
ENSMMUG00000000781	0.28	0.28	0.45	0.18	0.3	0.11	0.29	0.31	0.2	0.46	0.64	0.43	0.47	0.45	0.31	0.25	0.7	0.4	0.34	0.45	0.61	0.25	0.52	0.67	0.31	0.15	0.22	0.29	0.24	0.33	0.39	0.5	0.75	0.33	0.32	0.63	0.43	0.11	0.29	0.25	0.46	0.4	0.64	0.42	0.53	0.3	0.16	0.34	0.38
ENSMMUG00000000782	0.09	0.08	0.09	0.1	0.12	0.09	0.06	0.12	0.06	0.07	0.06	0.06	0.06	0.09	0.09	0.07	0.03	0.04	0.08	0.06	0.06	0.12	0.03	0.09	0.05	0.09	0.2	0.15	0.18	0.3	0.09	0.13	0.17	0.1	0.11	0.12	0.08	0.17	0.07	0.17	0.06	0.07	0.08	0.09	0.1	0.11	0.07	0.17	0.04
ENSMMUG00000000783	0.24	0.28	0.16	0.18	0.12	0.15	0.16	0.24	0.15	0.08	0.13	0.18	0.15	0.15	0.14	0.15	0.05	0.06	0.13	0.15	0.12	0.1	0.16	0.21	0.31	0.24	1.03	0.6	0.54	0.81	0.54	0.47	0.04	0.05	0.06	0.12	0.02	0.09	0.04	0.05	0.19	0.24	0.43	0.41	0.38	0.38	0.34	0.41	0.15
ENSMMUG00000000785	0.05	0.08	0.03	0.12	0.04	0.05	0.02	0.07	0.03	0.04	0.05	0.02	0.07	0.06	0.01	0.01	0.03	0.01	0.04	0.07	0	0.07	0.02	0.1	0.08	0.05	0.05	0.05	0.01	0.06	0.03	0.04	0.08	0.16	0.13	0.17	0.1	0.16	0.26	0.14	0.08	0.06	0.08	0.1	0.12	0.08	0.13	0.07	0.12
ENSMMUG00000000788	0	0.03	0.02	0	0	0.02	0.01	0.02	0.02	0	0.03	0.01	0.02	0.04	0.01	0.03	0.01	0.01	0.06	0.01	0.01	0.07	0.01	0	0.03	0.01	0.02	0.04	0.02	0.02	0.01	0	0.28	0.23	0.3	0.25	0.19	0.35	0.24	0.28	0.03	0.04	0.05	0.12	0.12	0.04	0.03	0.01	0.02
ENSMMUG00000000797	0.15	0.1	0.22	0.21	0.34	0.23	0.31	0.24	0.52	0.5	0.36	0.45	0.36	0.28	0.25	0.32	0.52	0.45	0.26	0.44	0.31	0.3	0.3	0.25	0.37	0.44	0.17	0.25	0.2	0.19	0.19	0.19	26.57	24.92	20.24	25.66	22.06	21.9	20.51	25	5.56	5.55	2.97	1.98	2.8	2.11	2.52	2.39	3
ENSMMUG00000000798	4.11	4.19	8.73	3.74	3.32	3.69	3.88	4.34	2.09	2.51	7.34	3.21	3.84	5.4	4.24	4.2	3.11	3.19	7.43	3.13	4.02	5.48	5.75	3.94	3.16	3.38	15.53	4.34	5.35	6.65	4.89	5.72	6.41	5.24	26.14	6.3	8.25	9.81	9.46	9.48	3.46	2.81	7.34	2.51	3.14	9.13	3.75	3.55	3.19
ENSMMUG00000000799	0	0.15	0.1	0.15	0.21	0	0.05	0.28	0.2	0	0.19	0.09	0.09	0	0.15	0.33	0.32	0.21	0.59	0.6	0	0.06	0	0.12	0	0	0.09	0	0	0	0	0	0.29	0.65	0.55	0.37	0.26	0.24	0.4	0.91	0.11	0.09	0.32	0.07	0	0	0.04	0.48	0.36
ENSMMUG00000000802	0.49	0.55	0.74	0.75	0.91	0.99	0.47	0.46	0.31	0.39	0.4	0.36	0.48	0.36	0.4	0.27	0.21	0.29	0.22	0.35	0.22	0.21	0.33	0.2	0.22	0.42	0.59	0.62	0.53	0.33	0.64	0.34	9.59	10.12	14.16	9.92	6.98	7.58	8.82	7.52	9.38	12.95	8.35	7.06	6.53	7.43	6.72	5.81	8.85
ENSMMUG00000000808	0.04	0.04	0.05	0.05	0.03	0.05	0.03	0.06	0.44	0.27	0.34	0.35	0.14	0.23	0.12	0.32	0.19	0.16	0.24	0.2	0.14	0.11	0.13	0.03	0.22	0.16	0.06	0.05	0.03	0.04	0.03	0.05	0.05	0.04	0.03	0.02	0.01	0.02	0.01	0.1	0.04	0.08	0.15	0.19	0.07	0.09	0.24	0.13	0.28
ENSMMUG00000000809	0	0	0	0	0	0	0	0	0	0	0	0	0	0	0	0	0	0	0	0	0	0	0	0	0	0	0	0	0	0	0	0	46.28	32.35	37	40.41	44.55	39.99	39.49	49.57	22.69	25.04	45.77	74.02	31.2	34.39	59.89	52.35	9.47
ENSMMUG00000000813	0	0	0	0	0	0.01	0.02	0	0.01	0	0	0	0	0	0.05	0	0	0	0.03	0	0	0.01	0	0	0	0	0.04	0.08	0	0.04	0	0	0.1	0.04	0	0	0	0	0.04	0	0.01	0	0.02	0	0	0	0	0.01	0.02
ENSMMUG00000000815	0.01	0	0.01	0	0.01	0.01	0.01	0	0	0	0.01	0	0.01	0.02	0.02	0	0.01	0.03	0.01	0	0	0	0.01	0.02	0.01	0.01	0.01	0.01	0.01	0	0.05	0.02	0.02	0.02	0.03	0.02	0.02	0	0.01	0.01	0.03	0.04	0.05	0.06	0.06	0.08	0.18	0.14	0.02
ENSMMUG00000000816	0.07	0.31	0.37	0.19	0.29	0.27	0.2	0.31	0.13	0.05	0.24	0.06	0.05	0.07	0.28	0.05	0.17	0.03	0	0.12	0.18	0.35	0.1	0	0.04	0.09	0.39	0.06	0.41	0	0.14	0.13	0.19	0.47	0.76	0.37	0.41	0.56	0.38	0.16	0.06	0.43	0.3	0.06	0.24	0.04	0.18	0.64	0.09
ENSMMUG00000000818	0.05	0.01	0.01	0.03	0	0.01	0.01	0.03	0.02	0.02	0.04	0.01	0.02	0.02	0.01	0.01	0.03	0.01	0.04	0.05	0.02	0	0.1	0.05	0.01	0.06	0.02	0.01	0.03	0.01	0.02	0.03	0.07	0.04	0.05	0.02	0.03	0.02	0.01	0.03	0.06	0.02	0	0.04	0.02	0.01	0	0.01	0.04
ENSMMUG00000000826	1.01	0.71	0.91	0.65	1	0.93	0.72	0.7	0.5	0.54	0.87	0.69	0.77	0.75	0.87	0.68	0.42	0.63	0.82	0.45	0.8	0.71	0.85	0.6	0.84	0.62	1.13	0.49	0.83	0.8	0.9	0.83	0.52	0.3	0.42	0.42	0.64	0.5	0.89	0.75	0.53	0.36	1.32	0.71	1.02	1.24	1.63	1	0.79
ENSMMUG00000000835	0.03	0.03	0.01	0.04	0.04	0.01	0.08	0	0.23	0.17	0.31	0.48	0.62	0.26	0.41	0.17	0.17	0.03	0.08	0.39	0.17	0.11	0.08	0.06	0.09	0.11	0.04	0.07	0.06	0.06	0.02	0.04	0.15	0.22	0.05	0.12	0.26	0.19	0.09	0.14	0.3	0.25	0.18	0.17	0.27	0.28	0.16	0.11	0.34
ENSMMUG00000000836	0.47	0.54	0.74	0.58	1.33	1.2	0.77	1.13	0.61	0.29	0.6	0.5	0.78	0.46	0.75	1.1	0.47	0.34	0.65	0.6	0.25	0.9	0.5	0.92	0.5	0.87	0.35	0.68	0.48	0.42	0.75	1.03	1.53	1.82	2.28	2.31	1.89	3.01	2.33	4.64	1.04	1.4	1.55	1.75	1.52	0.9	2.13	2.44	1.31
ENSMMUG00000000837	0.05	0.04	0.03	0.11	0.04	0.03	0.01	0.02	0.02	0.04	0.02	0.07	0.07	0.04	0	0.07	0.04	0.1	0.03	0.01	0.04	0.07	0.01	0.01	0.02	0.04	0.01	0.03	0.09	0.08	0.01	0.01	0.9	0.51	0.37	0.57	0.25	0.52	0.38	0.4	0.02	0.08	0.03	0.07	0.05	0.06	0	0.05	0.13
ENSMMUG00000000839	0.07	0.05	0.05	0.09	0.02	0.04	0.05	0.04	0.03	0.02	0.06	0.04	0.04	0.07	0.05	0.06	0.08	0.05	0.04	0.02	0.02	0.05	0.05	0.04	0.03	0.06	0.04	0.02	0.04	0.03	0.07	0.12	0.04	0.08	0.06	0.07	0.04	0.06	0.05	0.07	0.04	0.09	0.07	0.06	0.11	0.08	0.05	0.08	0.04
ENSMMUG00000000845	0.79	0.63	1.44	0.94	0.88	0.69	0.96	0.76	3.39	4.58	5.35	7.72	6.28	6.12	6.33	5.43	3.62	2.84	5.26	6.68	5.4	7.52	6.91	6.41	2.41	1.97	1.26	0.85	0.53	0.99	1.14	0.62	69.51	65.79	68.99	64.23	78.54	78.25	74.59	83.11	5.26	3.91	5.3	6.48	4.97	5.95	4.97	5.36	4.36
ENSMMUG00000000847	0.02	0.05	0.1	0	0.03	0.03	0.01	0	0	0.03	0.05	0.04	0.08	0	0.01	0.01	0.01	0	0.02	0.06	0.01	0	0.06	0.08	0.11	0.01	0.04	0.04	0	0	0.06	0	2.47	2.59	3.06	2.89	2.04	1.98	2.72	3.68	1.12	0.9	1.58	1.68	1.04	0.97	1.15	1.64	1.02
ENSMMUG00000000850	90.68	84.6	94.37	55.34	73.63	56.96	66.66	87.95	134.3	145.73	119.22	99.79	125.16	106.06	93.28	113.84	140.25	121.1	92.21	104.95	116.89	100.57	100.72	111.48	93.09	117.23	99.42	63.58	66	108.08	73.74	96.58	0.13	0.04	0.16	0.1	0.38	0.46	0.14	0	86.07	90.37	62.25	56.82	63.1	54.22	32.79	48.29	173.73
ENSMMUG00000000851	0.69	0.56	0.72	0.47	0.56	0.68	0.66	0.78	0.86	0.56	0.15	0.32	0.35	0.66	0.47	0.12	0.18	0.4	0.11	0.25	0.06	0.06	0.11	0.1	0.2	0.55	0.62	0.54	0.98	0.64	0.98	0.93	0.04	0.04	0.02	0.05	0.04	0.03	0.04	0.01	0	0.01	0.01	0.01	0.02	0	0	0.01	0.45
ENSMMUG00000000860	1.55	1.57	1.44	2.24	2.83	2.7	1.37	1.76	2.48	2.22	1.97	2.71	2.65	2.89	2.14	1.79	2.18	2.3	1.94	2.58	2.34	2.36	2.61	3.14	2.16	2.07	1.09	0.9	1.27	1.49	1.28	1.05	3.6	3.6	4.12	5.8	7.49	6.47	6.44	5.64	5.96	5.79	5.01	5.72	6.28	5.21	5.35	6.72	3.9
ENSMMUG00000000862	3.53	6.06	4.46	2.65	2.67	4.33	1.07	2.82	11.8	20.87	6.66	8.99	10.56	8.27	7.06	7.53	15.08	13.67	4.42	5.73	5.98	5.34	6.8	4.74	10.83	19.03	8.64	4.9	6.16	7.63	5.31	9.37	4.06	3.51	2.24	2.41	4.09	4.78	3.99	3.18	18.07	18.64	13.67	12.53	15.86	15.88	10.89	10.28	15.82
ENSMMUG00000000863	11.02	10.68	7.88	11.71	14.27	13.64	12.51	12.94	7.82	5.83	3.79	3.27	4.16	3.05	3.91	3.9	5.45	6.66	3.66	4.23	3.97	3.35	2.09	3.21	6.57	7.59	6.66	8.79	8.82	6.99	8.9	8.47	2.63	2.07	2.01	2.84	1.85	1.75	1.34	1.24	3.78	3.93	1.82	4.18	4.96	3.03	3.47	3.2	4.87
ENSMMUG00000000864	0.05	0.08	0.02	0.03	0.05	0.09	0.01	0.21	0.17	0.18	0.05	0.14	0.09	0.06	0.07	0.08	0.13	0.11	0.12	0.13	0.1	0.02	0	0.09	0.16	0.26	0.1	0.08	0.03	0.05	0.09	0.16	0.09	0.06	0.07	0.09	0.01	0.04	0.08	0.11	0.09	0.18	0.04	0.03	0.04	0.07	0.14	0.09	0.06
ENSMMUG00000000870	0.12	0.2	0.23	0.2	0.21	0.08	0.07	0.13	0.09	0.1	0.17	0.15	0.17	0.08	0.11	0.09	0.05	0.11	0.19	0.11	0.16	0.12	0.12	0.03	0.19	0.16	0.16	0.12	0.23	0.04	0.13	0.15	0.09	0.04	0.09	0.18	0.09	0.04	0.2	0.09	0.16	0.09	0.16	0.1	0.35	0.11	0.18	0.18	0.14
ENSMMUG00000000872	0.05	0.06	0.02	0.02	0.03	0	0.01	0.04	0.09	0.04	0.07	0.02	0.04	0.05	0.01	0.04	0.01	0.05	0.03	0.02	0.08	0	0	0.02	0.03	0.04	0.13	0.04	0.13	0.09	0.05	0.04	0.08	0.02	0.02	0.03	0.02	0.02	0	0.03	0.1	0.02	0.03	0.02	0.05	0	0	0.01	0.08
ENSMMUG00000000877	0.08	0	0.05	0.02	0	0	0	0	0	0	0	0.04	0	0.06	0	0	0.05	0	0.13	0	0	0	0.05	0	0.03	0	0	0	0	0.14	0	0	0.09	0	0.1	0.15	0	0.2	0	0	0	0	0	0.28	0.08	0.08	0	0.09	0.21
ENSMMUG00000000880	1.01	0.77	2.14	1.24	0.94	0.64	0.95	0.97	0.45	0.78	2.08	1.46	1.38	1.24	1.63	1.51	0.54	0.32	1.3	1.55	0.56	0.61	0.82	0.75	0.92	0.78	3.18	1.47	1.05	1.56	1.45	2.3	0.93	0.73	2.24	1.17	0.97	0.93	0.7	1.27	1.4	0.86	2.4	1.8	2.02	2.02	2.07	1.81	0.71
ENSMMUG00000000882	0.33	0.61	0.79	0.29	0.19	0.27	0.42	0.16	1.58	1.08	2.22	1.4	2.25	1.58	1.6	1.2	0.86	0.78	1.96	1.27	1.63	1.36	1.54	1.82	1.04	1.01	1.64	1.19	1.42	1.15	0.89	1.16	0.36	0.13	1.65	0.56	1.43	1.32	0.96	0.67	4.02	3.77	8.98	6.86	6.37	6.23	5.51	6.04	3.64
ENSMMUG00000000884	0.38	0.16	0.27	0.28	0.11	0.06	0.16	0.09	1.46	0.96	0.99	1.09	0.75	0.84	0.99	0.53	1.49	1.52	1.08	1.19	0.61	0.6	1.1	0.89	0.63	0.63	0.52	0.26	0.23	0.62	0.49	0.23	3.83	4.95	4.26	4.74	5.01	4.05	5.77	5.38	55.61	78.12	57	49.61	50.95	58.09	44.52	58.6	27.38
ENSMMUG00000000891	0	0	0	0	0	0	0	0	0	0	0	0	0	0	0	0	0	0	0	0	0	0	0	0	0	0	0	0	0	0	0	0	0.91	0.6	1.26	1.04	0.9	0.55	1.06	0.84	1.07	0.85	0.76	0.98	0.96	0.93	0.94	1.05	0.57
ENSMMUG00000000892	2.46	2.85	3.07	2.33	2.53	2.08	1.63	2.13	4.21	5.7	3.56	3.93	3.07	3.66	3.23	2.59	4.64	3.81	2.5	3.28	2.5	2.85	2.48	2.39	4.17	3.25	2.37	1.95	2.71	2.54	3.01	1.68	8.82	7.93	5.79	5.83	2.62	3.41	3.43	2.38	48.78	59	31.45	32.23	27.59	39.41	26.92	34.07	25.99
ENSMMUG00000000896	0.23	0.62	0.42	0.31	0.34	0.23	0.57	0.44	0.83	0.73	1.16	1.09	1.53	1.17	1.38	1.43	0.66	0.64	0.8	0.76	1.44	1	1.57	0.73	0.5	0.56	0.42	0.33	0.62	0.38	0.54	0.31	0.74	0.63	0.67	0.81	0.65	0.5	0.59	0.5	0.93	0.8	0.68	0.57	1.21	0.78	0.71	1.12	0.84
ENSMMUG00000000901	0	0	0	0	0	0	0	0	0	0	0	0	0	0	0	0	0	0	0	0	0	0	0	0	0	0	0	0	0	0	0	0	0	0.05	0	0.03	0	0.06	0.12	0	0.06	0	0	0.02	0.06	0.04	0	0.02	0
ENSMMUG00000000902	0.04	0.05	0.3	0.1	0.01	0.02	0.05	0.03	0.09	0.13	0.57	0.19	0.17	0.22	0.24	0.23	0.14	0.04	0.57	0.22	0.1	0.14	0.35	0.02	0.09	0.09	0.49	0.07	0.03	0.06	0.07	0.01	0.1	0.24	0.74	0.4	0.11	0.36	0.18	0.26	0.25	0.2	0.8	0.12	0.21	0.22	0.23	0.1	0.15
ENSMMUG00000000903	0.27	0.15	0.83	0.26	0.36	0.35	0.75	0.66	0.08	0.31	0.52	0.39	0.43	0.45	0.49	0.46	0.21	0.08	0.37	0.36	0.51	0.47	0.55	0.44	0.33	0.15	0.34	0.5	0.58	0.82	0.92	1.11	0.29	0.25	0.22	0.27	0.3	0.31	0.21	0.3	0.34	0.13	0.28	0.3	0.43	0.44	0.48	0.35	0.59
ENSMMUG00000000905	0.11	0.17	0.32	0.11	0.18	0.2	0.1	0.08	0.17	0.28	0.39	0.14	0.54	0.25	0.29	0.3	0.16	0.18	0.3	0.16	0.27	0.49	0.04	0.11	0.07	0.13	0.53	0.35	0.41	0.37	0.23	0.18	0.9	0.65	1.55	0.49	1.2	1.29	0.42	0.87	0.34	0.24	0.91	0.19	0.88	0.64	0.12	0.24	0.34
ENSMMUG00000000911	0.01	0	0.01	0	0	0.04	0	0.01	0.03	0.03	0.02	0.01	0.07	0.04	0.01	0.02	0.02	0	0.02	0.01	0.01	0.02	0.05	0.02	0.02	0	0.08	0.05	0.05	0.12	0.04	0.01	0.07	0.02	0.05	0.04	0.03	0.02	0	0.02	0.02	0.01	0.03	0.03	0	0.02	0.01	0.01	0.02
ENSMMUG00000000913	0.01	0.04	0.01	0.02	0.02	0	0.03	0.01	0.01	0	0.03	0	0	0.04	0.02	0	0.01	0.02	0	0	0.02	0.02	0	0.01	0	0.05	0.03	0	0	0.05	0	0	0.27	0.23	0.22	0.16	0.09	0.29	0.53	0.49	0.01	0.03	0	0.05	0.02	0.04	0.02	0.09	0.17
ENSMMUG00000000915	0.38	0.36	0.22	0.4	0.53	0.47	0.41	0.47	0.31	0.27	0.15	0.24	0.12	0.07	0.07	0.09	0.17	0.26	0.24	0.16	0.09	0.18	0.16	0.23	0.28	0.2	0.39	0.29	0.2	0.34	0.36	0.22	0.5	0.76	0.81	0.46	0.46	0.51	0.53	0.36	1.33	1.9	1.46	1.07	1.12	1.42	0.79	1.12	2.49
ENSMMUG00000000924	0.06	0.02	0.03	0.04	0.03	0.03	0.02	0.08	0.02	0.04	0.03	0.02	0.04	0.02	0.03	0.03	0.06	0.03	0.06	0.04	0	0.05	0.02	0.07	0.03	0.03	0.05	0.15	0.04	0.04	0.04	0.01	0.07	0.05	0.07	0.06	0.05	0.05	0.05	0.03	0.06	0.06	0.02	0.01	0.01	0.02	0.04	0.02	0.06
ENSMMUG00000000926	0.01	0.03	0.01	0.02	0.02	0.05	0.02	0.06	0.02	0.02	0	0.03	0.03	0.01	0.02	0.01	0.04	0.02	0.01	0.06	0.05	0.01	0.01	0.01	0.01	0.04	0.02	0.06	0.05	0	0.02	0.08	0.07	0.04	0.07	0.05	0.03	0.04	0.05	0.03	0.03	0.01	0.03	0.01	0.03	0.03	0.03	0.01	0.02
ENSMMUG00000000927	0.43	0.39	0.42	0.41	0.39	0.3	0.23	0.45	0.53	0.37	0.42	0.39	0.46	0.44	0.45	0.49	0.16	0.34	0.15	0.41	0.49	0.3	0.32	0.48	0.53	0.39	0.59	0.59	0.57	0.54	0.42	0.49	0.62	0.83	0.45	0.93	0.47	0.54	0.51	0.66	0.39	0.66	0.76	0.47	0.49	0.6	0.65	0.59	0.56
ENSMMUG00000000929	0.36	0.22	0.61	0.59	0.21	0.41	0.98	0.38	0.15	0.27	0.56	0.9	0.1	1.32	1.72	0.36	0.37	0.34	0.63	0.66	0.16	0.37	1.73	0.22	0.42	0.39	0.61	1.12	0.15	1.36	1.37	1.07	0.94	0.96	1.07	1.51	0.49	1.61	1.17	0.78	0.63	0.39	1.26	1.16	0.22	1.63	2.62	0.76	0.58
ENSMMUG00000000930	0.24	0.28	0.31	0.16	0.15	0.15	0.23	0.25	0.35	0.28	0.31	0.22	0.06	0.04	0.24	0.12	0.2	0.14	0.12	0.23	0.1	0.1	0.09	0.06	0.07	0.24	0.19	0.07	0.09	0.16	0.06	0.12	0.12	0.09	0.12	0.17	0	0.13	0.12	0.12	0.03	0.11	0.08	0.11	0	0.08	0.06	0.23	0.06
ENSMMUG00000000934	0.18	0.09	0.09	0.14	0.15	0.04	0.07	0	0.2	0.24	0.23	0.22	0.44	0.5	0.71	0.39	0.76	0.11	0.17	0.12	0.25	0.15	0.05	0.25	0.06	0.21	0.05	0.05	0.15	0.24	0.18	0.14	0.73	0.33	0.56	0.35	0.55	0.54	0.21	0.63	0.59	0.53	0.46	0.49	0.44	0.19	0.66	0.23	0.88
ENSMMUG00000000935	8.98	8.61	9.75	8.7	5.95	8.11	11.65	11.07	6.88	7.79	11	10.96	7.32	11.77	19.37	16.55	6.41	6.42	8.46	9.32	8.04	9.92	16.66	13.37	8.67	8.67	10.17	9.32	6.81	10.67	17.18	19.96	16.41	19.04	18.39	19.82	17.95	23.17	27.14	24.43	10.53	10.34	14.17	13.44	9.87	14.14	22.13	18.2	9.59
ENSMMUG00000000937	0.24	0.22	0.17	0.19	0.33	0.23	0.25	0.22	0.31	0.31	0.22	0.32	0.19	0.21	0.53	0.38	0.37	0.22	0.32	0.18	0.19	0.19	0.21	0.26	0.4	0.3	0.15	0.25	0.18	0.5	0.26	0.15	1.52	1.08	0.73	0.88	1.04	1.17	1.46	0.63	0.84	0.79	0.55	0.67	0.72	0.59	0.92	0.71	0.95
ENSMMUG00000000947	0.95	0.69	1.12	1.32	0.81	0.99	1.09	0.96	0.39	0.28	0.8	0.58	0.35	0.46	0.43	0.64	0.53	0.35	0.85	0.4	0.58	0.62	0.84	0.77	0.66	0.67	1.1	1	1	0.73	1.33	0.83	0.13	0.14	0.12	0.06	0.13	0.07	0.07	0.17	1.78	2.69	3.71	4.6	4.12	1.94	2.88	3.89	0.42
ENSMMUG00000000952	0.09	0.13	0.19	0.08	0.07	0.15	0.06	0.11	0.11	0.15	0.15	0.09	0.13	0.11	0.21	0.2	0.14	0.12	0.13	0.17	0.13	0.22	0.15	0.18	0.12	0.09	0.17	0.1	0.18	0.15	0.19	0.15	0.37	0.5	0.34	0.38	0.38	0.27	0.59	0.34	1.02	0.66	0.29	0.54	0.5	0.49	0.45	0.54	0.6
ENSMMUG00000000958	0.21	0.15	0.06	0.01	0.31	0.15	0.1	0.15	0.33	0.43	0.03	0.19	0.1	0.18	0.03	0.05	0.6	0.32	0.06	0.46	0.2	0.19	0.02	0.06	0.27	0.19	0.06	0.07	0.1	0.07	0.24	0.16	0.19	0.11	0.02	0	0.01	0.01	0.03	0.06	0.42	0.12	0	0	0.04	0	0	0.04	0.42
ENSMMUG00000000961	0.01	0	0.01	0.11	0	0	0.05	0.01	0	0.06	0.01	0.19	0.09	0	0.04	0	0.14	0.06	0	0.07	0.21	0.03	0.04	0.02	0.06	0.01	0.02	0.21	0.04	0	0.03	0	0.27	0.12	0.11	1	0.15	0.16	0.4	0.06	0.03	0.03	0.03	0.31	0.17	0.03	0.23	0.03	0.13
ENSMMUG00000000964	0	0.01	0.01	0	0.01	0	0.02	0.03	0.03	0.03	0.02	0.01	0.01	0.03	0.03	0.01	0.01	0.01	0.01	0.01	0	0.03	0.07	0.03	0.02	0.01	0	0.01	0	0	0.02	0.01	0	0.05	0.04	0.03	0.03	0.01	0.02	0.02	0.01	0.01	0.01	0.01	0.01	0.03	0.09	0.04	0.02
ENSMMUG00000000968	0.11	0.18	0.13	0.17	0.16	0.14	0.15	0.14	0.17	0.18	0.16	0.16	0.25	0.11	0.19	0.17	0.35	0.3	0.17	0.22	0.15	0.21	0.46	0.33	0.39	0.15	0.18	0.47	0.19	0.19	0.36	0.22	0.4	0.28	0.16	0.39	0.44	0.27	0.19	0.07	0.39	0.17	0.36	0.31	0.23	0.28	0.35	0.28	0.48
ENSMMUG00000000970	0.38	0.55	0.55	0.19	0.49	0.47	0.12	0.44	0.31	0.62	0.66	1.06	0.66	0.75	0.78	0.68	0.61	0.46	0.12	0.43	1	0.67	1.52	0.89	0.94	0.75	1.19	1.14	1.25	1.16	0.88	0.9	3.19	1.94	3.27	4.52	5.06	4.24	3.51	3.62	1.36	1.57	2.05	3.2	2.77	2.77	2.26	2.52	0.47
ENSMMUG00000000971	0.23	0.34	0.34	0.29	0.07	0.09	0.36	0.31	0.11	0.11	0.08	0.08	0.04	0.14	0.13	0.07	0.02	0.1	0.09	0.31	0.12	0.08	0.18	0.44	0.55	0.39	1.31	0.71	0.79	1.49	0.75	1.08	0.68	0.57	0.39	0.55	0.42	0.46	0.42	0.76	0.33	0.33	0.65	0.53	0.36	0.36	0.6	0.57	0.35
ENSMMUG00000000975	0.06	0.03	0.03	0.05	0.07	0.08	0.05	0.04	0.03	0.03	0.01	0.03	0.03	0.05	0.03	0.02	0.03	0.02	0.05	0.04	0.04	0.07	0.01	0.03	0.05	0.03	0.04	0.03	0.05	0.05	0.05	0.02	0.09	0.05	0.06	0.05	0.03	0.05	0.05	0.04	0.07	0.06	0.06	0.05	0.04	0.09	0.07	0.07	0.05
ENSMMUG00000000984	0.12	0.1	0.09	0.26	0.16	0.2	0.14	0.24	0.05	0.14	0.19	0.31	0.3	0.3	0.43	0.45	0.09	0.14	0.12	0.28	0.21	0.4	0.26	0.29	0.08	0.11	0.21	0.42	0.43	0.52	0.33	0.51	0.08	0.13	0.11	0.11	0.15	0.23	0.31	0.31	0.13	0.12	0.11	0.28	0.17	0.25	0.39	0.28	0.09
ENSMMUG00000000986	0.01	0.02	0.05	0.02	0.03	0.02	0.03	0.01	0.03	0	0.01	0.06	0.05	0.04	0.01	0.04	0.03	0.02	0	0.01	0.03	0.01	0	0.01	0.01	0	0	0	0	0.01	0.03	0.05	0.02	0.02	0.01	0.03	0	0.03	0.02	0	0.01	0.01	0.08	0.01	0.02	0.03	0.03	0.02	0.03
ENSMMUG00000000987	0.18	0.23	0.1	0.12	0.17	0.09	0.09	0.15	0.03	0.03	0.06	0.04	0.12	0.04	0.05	0.11	0.05	0.05	0.1	0.02	0.09	0.08	0.14	0.14	0.19	0.2	0.36	0.27	0.3	0.39	0.29	0.36	0.05	0.04	0.08	0.05	0.1	0.05	0.1	0.09	0.13	0.13	0.24	0.16	0.26	0.2	0.35	0.19	0.07
ENSMMUG00000000989	0.06	0	0.01	0.01	0.01	0.02	0.02	0.01	0	0.04	0.06	0	0.01	0.07	0.01	0	0	0.03	0.02	0.01	0	0.01	0	0.02	0.04	0	0.04	0	0.01	0.03	0.03	0.05	0.03	0	0.01	0.03	0	0.01	0.04	0	0.05	0	0.04	0.05	0.02	0.01	0.06	0.06	0.03
ENSMMUG00000000991	0.01	0.02	0	0.01	0.01	0.03	0.01	0.01	0	0.03	0	0.01	0.01	0.03	0.03	0.07	0.07	0.04	0.03	0.02	0.06	0.01	0.06	0.06	0.02	0.01	0.02	0.01	0.04	0.12	0.01	0	0	0	0.02	0.01	0.01	0.02	0.01	0	0.04	0.01	0	0.03	0.01	0.07	0.05	0.05	0.1
ENSMMUG00000000995	0.71	0.54	0.79	0.62	0.67	0.57	0.58	0.56	0.32	0.46	0.8	0.53	0.75	0.71	0.53	0.89	0.34	0.44	1.07	0.86	0.88	0.7	0.81	1.16	0.63	0.71	0.97	0.73	0.8	0.8	0.62	0.99	1.41	0.74	1.85	1.99	1.88	1.61	1.59	1.71	0.88	0.66	1.19	1.18	1.12	1.26	1.04	0.83	0.68
ENSMMUG00000001000	1.69	1.48	1.26	1.35	0.64	0.72	0.65	1.32	1.53	1.63	1.34	1.66	1.87	1.61	3.06	1.94	1.61	0.88	1.14	2.44	1.26	1.7	2.58	1.18	1.88	2.48	1.06	1.04	0.97	0.8	0.98	1.49	2.08	1.91	1.24	2.37	1.23	2.57	1.69	2.68	2.39	1.2	1.27	2.43	1.31	1.1	2.54	2.03	1.93
ENSMMUG00000001009	0.05	0	0.04	0.05	0	0	0	0	0.06	0.09	0.05	0.04	0.1	0.05	0	0	0.01	0	0.18	0.02	0	0	0	0.01	0	0.03	0.11	0.09	0	0.09	0.05	0	0.05	0.03	0.05	0	0.02	0	0	0	0.01	0.01	0.05	0.01	0.05	0	0	0	0.07
ENSMMUG00000001011	0.06	0.04	0.2	0.06	0.03	0.17	0.22	0.08	0.19	0.1	0.11	0.03	0.07	0.03	0.04	0.05	0.2	0.34	0.26	0.22	0.02	0.14	0.1	0.23	0.04	0.02	0.15	0.13	0.05	0.08	0.12	0.06	0	0.12	0.14	0.11	0.05	0.05	0.19	0.1	0.15	0.25	0.1	0.12	0	0.12	0.11	0.02	0.08
ENSMMUG00000001014	0.37	0.44	0.38	0.21	0.24	0.34	1.06	0.86	0.1	0.09	0.09	0.09	0.64	1.39	0.91	1.15	0.05	0.07	0.41	0.02	1.96	2.41	5.86	4.51	0.22	0.2	0.83	0.77	1.46	1.43	1.99	1.95	0.11	0.21	0.2	0.21	1.54	2.78	3.71	5.44	0.19	0.36	1.64	0.67	2.87	3.54	4.78	4.25	0.26
ENSMMUG00000001016	0.03	0.09	0.09	0.03	0.05	0.04	0.08	0.14	0.05	0.06	0.05	0.16	0.11	0.03	0.02	0.1	0.05	0.03	0	0.11	0.15	0.11	0.28	0.01	0.05	0.02	0.11	0.14	0.02	0.25	0.19	0.24	0.14	0.35	0.04	0.27	0.1	0.02	0.16	0.19	0.05	0.05	0.19	0.2	0.06	0.03	0.1	0.03	0.23
ENSMMUG00000001017	0.02	0.01	0.02	0.01	0	0.02	0.01	0	0.02	0.02	0.01	0.01	0	0.02	0.03	0.02	0	0	0.05	0.07	0.01	0	0.01	0.03	0.02	0	0.03	0.03	0.01	0.04	0.16	0	0.01	0.01	0.04	0.05	0.01	0.02	0.02	0.05	0.02	0	0.04	0.03	0.02	0.01	0.06	0.04	0
ENSMMUG00000001022	0.03	0	0.01	0	0.02	0	0.01	0	0	0	0.01	0.01	0.04	0.02	0	0.02	0	0	0.06	0.02	0	0.02	0.04	0.01	0	0	0.04	0	0	0	0	0	0	0	0.03	0.03	0.03	0.02	0.01	0.04	0.01	0	0	0	0	0	0	0	0
ENSMMUG00000001039	0	0	0.02	0.01	0.03	0.01	0.03	0.03	0.06	0.01	0.01	0.01	0.03	0.03	0.01	0.04	0.01	0.05	0.03	0.02	0.06	0.04	0	0.05	0.04	0.06	0	0	0	0.01	0	0.03	0.95	0.66	0.39	0.36	0.21	0.28	0.5	0.26	0.06	0.18	0.08	0.09	0.08	0.07	0.14	0.12	0.14
ENSMMUG00000001043	0.06	0.1	0.18	0.08	0.09	0.15	0.16	0.25	0.08	0.05	0.23	0.14	0.14	0.28	0.12	0.26	0.17	0.1	0.23	0.08	0.16	0.25	0.24	0.46	0.05	0.1	0.14	0.12	0.2	0.28	0.24	0.41	10.39	10.82	7.61	9.05	7.88	8.11	7.92	8.96	1.51	1.85	3.15	2.34	2.71	3.06	3.73	4.34	2.23
ENSMMUG00000001047	0.05	0.09	0.08	0.15	0.02	0.07	0.06	0.03	0.03	0.06	0.13	0.08	0.14	0.04	0.05	0.15	0.03	0	0.14	0.17	0.04	0.23	0.18	0.29	0.04	0.05	0.07	0	0.07	0.06	0.07	0.2	0.03	0.04	0.17	0.16	0.13	0.15	0.13	0.07	0.02	0.06	0.15	0.19	0.28	0.23	0.07	0.47	0.09
ENSMMUG00000001048	0.72	0.46	0.38	0.6	0.49	0.46	0.64	0.43	0.23	0.45	0.03	0.47	0.36	0.53	0.74	0.84	0.29	0.16	0.64	0.49	0.39	0.33	0.46	0.48	0.24	0.84	0.33	1.02	0.54	0.38	0.93	0.6	0.97	0.72	1.91	1.43	1.42	1.48	1.18	1.32	1.14	1.14	1.61	0.89	1.74	1.48	1.87	1.65	1.14
ENSMMUG00000001050	0.48	0.21	0.83	0.39	0.35	0.16	0.27	0.54	0.26	0.39	1.04	0.8	0.57	0.78	0.7	0.84	0.34	0.32	0.91	0.6	0.42	0.84	0.28	0.63	0.35	0.49	0.77	0.39	0.59	0.6	0.34	0.97	0.29	0.42	0.42	0.63	0.4	0.23	0.38	0.33	0.64	0.52	1.04	0.52	0.48	1.15	0.58	0.63	0.49
ENSMMUG00000001056	0.01	0	0	0.02	0.01	0.03	0.02	0	0	0	0	0	0	0	0	0	0	0.07	0.03	0	0	0	0	0	0.01	0	0	0	0	0	0	0.04	0	0.01	0	0.01	0	0.03	0	0.02	0	0	0	0.03	0	0.04	0.02	0.03	0.01
ENSMMUG00000001057	0.22	0.13	0.1	0.19	0.17	0.24	0.16	0.13	0.68	0.73	0.52	0.67	0.48	0.64	0.3	0.53	0.24	0.33	0.33	0.61	0.18	0.33	0.36	0.2	0.16	0.21	0.12	0.22	0.15	0.22	0.16	0.2	0.22	0.14	0.15	0.15	0.19	0.2	0.12	0.13	0.54	0.57	0.24	0.27	0.23	0.22	0.19	0.21	0.66
ENSMMUG00000001088	0.59	0.64	0.73	0.36	0.13	0.27	0.25	0.33	1.03	0.81	0.92	0.74	0.41	0.62	0.59	0.66	1.15	1.09	0.64	0.45	0.54	0.49	0.36	0.44	1.27	1.14	0.67	0.82	0.29	0.45	0.1	0.25	38.64	41.35	29.28	42.63	29.53	28.48	31.5	29.73	3.81	4.36	2.32	2.69	2.32	2.95	2.16	2.39	4.49
ENSMMUG00000001090	5.1	4.58	4.33	6.07	5.71	5.39	4.24	4.93	2.28	2.97	2.02	2.11	2.19	2.62	2.52	2.81	1.73	1.8	1.67	2.79	2.07	1.97	1.98	1.68	1.96	2.13	1.78	2.18	1.98	2.07	2.81	1.81	9.67	11.62	7.24	9.74	9.79	10.01	10.18	9.19	5.41	5.26	2.19	2.45	1.93	3.19	1.99	2.62	4.3
ENSMMUG00000001094	3.18	2.16	1.64	1.49	1.04	1.02	1.01	1.38	1.65	2.09	4.09	3.46	6.58	4.05	9.13	5.95	2.44	1.07	2.02	0.72	3.48	2.09	4.18	2.34	1.12	1.02	1.44	1.38	1.49	1.46	1.52	1.05	0.54	0.69	0.48	0.43	0.5	0.64	0.53	0.35	3.21	2.38	2.14	1.99	2.67	2.18	4.53	1.93	1.41
ENSMMUG00000001102	0.98	1.34	1.94	1.33	1.25	0.9	1.21	1.33	0.51	0.65	0.81	1.02	0.71	0.54	0.57	0.88	0.31	0.44	0.63	0.76	0.51	0.66	0.16	0.39	0.74	0.87	1.41	1.03	1.05	1.99	1.31	1.51	0.41	0.44	0.93	0.25	0.69	0.47	0.5	0.75	1.49	1.15	0.99	0.72	0.51	1.05	0.62	1.01	1.22
ENSMMUG00000001107	0.25	0.25	0.32	0.31	0.37	0.26	0.9	0.72	0.19	0.09	0.25	0.2	0.34	0.39	0.42	0.43	0.16	0.18	0.16	0.3	0.35	0.42	0.56	0.44	0.19	0.28	0.48	0.43	0.85	0.56	1.04	0.86	0.4	0.18	0.17	0.23	0.27	0.32	0.49	0.47	0.17	0.17	0.24	0.22	0.38	0.37	0.61	0.6	0.15
ENSMMUG00000001108	0.13	0.18	0.35	0.1	0.17	0.19	0.1	0.17	0.92	0.94	1.06	1.07	0.99	1.07	1.02	1.08	0.7	0.45	0.62	0.74	0.49	0.84	0.98	0.82	0.74	0.42	0.27	0.34	0.14	0.38	0.36	0.2	1.54	1.19	0.97	1.35	1	1.09	0.92	0.83	13.74	14.6	11.28	10.31	8.2	11.28	9.25	10.53	5.92
ENSMMUG00000001124	0.08	0.04	0	0.02	0.02	0.01	0.01	0.03	0.04	0.02	0.06	0.03	0.05	0.05	0.16	0.05	0.1	0.04	0.02	0.13	0.04	0.03	0.1	0.03	0.02	0.05	0.01	0.05	0.02	0.03	0.05	0.06	0.3	0.36	0.16	0.26	0.15	0.05	0.13	0.1	0.07	0.02	0.02	0.11	0.02	0.04	0.14	0.07	0.11
ENSMMUG00000001128	1.22	1.27	0.76	0.9	0.59	0.6	1.06	0.65	0.19	0.27	0.22	0.14	0.23	0.25	0.13	0.21	0.26	0.13	0.26	0.39	0.24	0.13	0.36	0.21	1.36	1.08	2.86	1.59	2.2	2.74	1.29	1.78	0.65	0.62	0.62	0.62	0.5	1.03	0.77	0.69	0.26	0.23	0.46	0.18	0.23	0.16	0.49	0.34	0.17
ENSMMUG00000001134	0	0	0	0	0	0	0	0	0	0	0	0	0	0	0	0	0	0	0	0	0	0	0	0	0	0	0	0	0	0	0	0	0.79	0.38	2.35	1.51	2.26	2.53	2.54	2.43	0.23	0.08	0.31	0.31	1.04	1	1.7	2.92	0.22
ENSMMUG00000001141	0.2	0.17	0.34	0.22	0.2	0.22	0.26	0.31	0.13	0.22	0.32	0.24	0.31	0.3	0.29	0.32	0.19	0.16	0.28	0.3	0.23	0.16	0.17	0.25	0.38	0.24	0.4	0.5	0.48	0.58	0.38	0.58	0.83	1.08	0.81	0.9	0.99	0.65	0.93	1.12	1.29	1.07	1.49	0.91	1.92	2.36	1.79	1.92	1.03
ENSMMUG00000001143	0.4	0.53	0.2	0.2	0.03	0.13	0.05	0.06	0.19	0.3	0.32	0.05	0.04	0.12	0.22	0.27	0.1	0.01	0.04	0.03	0	0.13	0.04	0.02	0.23	0.4	0.55	0.24	0.32	0.59	0.11	0.44	4.68	4.77	4.34	5.48	8.18	9.36	6.02	7	0.1	0.01	0.04	0	0	0.01	0	0.02	0.06
ENSMMUG00000001145	0.29	0.46	0.37	0.13	0.28	0.18	0.33	0.26	0.23	0.3	0.22	0.21	0.45	0.51	0.33	0.29	0.23	0.2	0.24	0.29	0.23	0.29	0.29	0.21	0.46	0.39	0.39	0.23	0.19	0.34	0.36	0.28	0.7	0.55	0.3	0.36	0.4	0.22	0.33	0.56	0.51	0.53	0.75	0.5	0.48	0.41	0.7	0.46	0.46
ENSMMUG00000001166	0.76	0.46	0.67	0.43	0.27	0.31	0.36	0.49	0.51	0.99	0.69	0.87	0.64	0.61	0.75	0.61	0.34	0.71	0.62	0.67	0.49	0.49	0.82	0.48	0.63	0.39	0.71	0.77	0.7	1.41	0.7	1.1	0.45	0.3	0.24	0.25	0.75	0.48	0.86	0.44	0.92	0.14	0.6	0.55	0.33	0.43	0.56	0.43	0.78
ENSMMUG00000001171	0.46	0.28	0.17	0.2	0.15	0.19	0.16	0.12	0.17	0.27	0.2	0.3	0.11	0.06	0.14	0.19	0.38	0.41	0.21	0.29	0.06	0.21	0.17	0.1	0.16	0.28	0.3	0.46	0.22	0.46	0.21	0.18	1.68	1.14	0.24	0.53	0.16	0.26	0.14	0.28	0.52	0.6	0.43	0.49	0.4	0.16	0.16	0.26	0.69
ENSMMUG00000001172	0.33	0.41	0.31	0.13	0.23	0.3	0.24	0.48	0.25	0.26	0.13	0.08	0.23	0.19	0.19	0.41	0.11	0.23	0.29	0.15	0.15	0.19	0.26	0.34	0.31	0.26	0.22	0.18	0.11	0.19	0.06	0.25	0.48	0.59	0.49	0.28	0.44	0.34	0.31	0.48	0.28	0.47	0.43	0.2	0.19	0.16	0.3	0.73	0.55
ENSMMUG00000001174	0.19	0	0.08	0.04	0.04	0	0.06	0.17	0.13	0.08	0.07	0	0.1	0.09	0.12	0.15	0.14	0	0.08	0.04	0.11	0.11	0.06	0.18	0	0.16	0.1	0	0	0.07	0	0	0.4	0.39	0.29	0.44	0.3	0.25	0.27	0.19	0.57	0.53	0.28	0.16	0.34	0.31	0.28	0.88	1.18
ENSMMUG00000001181	0.3	0.39	0.18	0.28	0.31	0.76	0.66	0.48	0.37	0.19	0.28	0.27	0.31	0.34	0.26	0.22	0.17	0.16	0.39	0.33	0.13	0.37	0.28	0.22	0.24	0.21	0.36	0.24	0.16	0.44	0.35	0.18	2	2.98	2.14	2.08	0.64	2.44	3.21	1.85	0.31	0.39	0.32	0.36	0.28	0.38	0.47	0.33	0.34
ENSMMUG00000001187	0.89	0.51	0.46	0.28	0.11	0.08	0.51	0.33	0.71	0.31	0.55	0.41	0.21	0.37	1.5	0.66	0.4	0.23	0.22	0.3	0.06	0.07	0.57	0.17	0.58	0.55	0.62	0.77	0.32	0.99	0.74	0.5	0.1	0.03	0.01	0	0	0.01	0	0	0.18	0.1	0.09	0.03	0	0.02	0.07	0	0.31
ENSMMUG00000001190	0.03	0.07	0.04	0.05	0.04	0.07	0.07	0.07	0.1	0.06	0.06	0.06	0.05	0.15	0.11	0.06	0.15	0.06	0.05	0.07	0.06	0.11	0.1	0.12	0.16	0.13	0.07	0.14	0.03	0.22	0.12	0.03	0.18	0.22	0.11	0.17	0.17	0.25	0.15	0.18	0.28	0.35	0.2	0.19	0.11	0.21	0.22	0.14	0.48
ENSMMUG00000001195	0	0	0	0	0	0	0	0	0	0	0	0	0	0	0	0	0	0	0	0	0	0	0	0	0	0	0	0	0	0	0	0	1.73	1.22	0.93	1.17	0.54	0.98	0.5	1.24	0.19	0.14	0.1	0.22	0.17	0.72	0.23	0.27	0.09
ENSMMUG00000001196	0	0.27	0.04	0.04	0	0.15	0.02	0.12	0.07	0	0	0.03	0	0.21	0.11	0.29	0	0.39	0	0.02	0	0	0.09	0.44	0	0.23	0.03	0.03	0.03	0.14	0.04	0.23	0.1	0.09	0.05	0.3	0.07	0	0.03	0.21	0.02	0.02	0	0.16	0	0.02	0	0.07	0.05
ENSMMUG00000001203	1.21	2.04	1.9	1.35	1.04	0.88	1.45	0.86	2.51	3.43	1.57	3.52	1.43	1.88	1.45	1.77	3.51	2.36	2.19	2.54	1.59	1.54	2.03	0.99	1.05	1.15	1.29	0.67	2.1	1.42	1.32	0.93	3.18	2.7	4.01	4.36	5.47	8.5	8.53	6.85	1.75	1.26	0.72	0.89	1.89	0.84	0.74	1.45	3.83
ENSMMUG00000001207	0.01	0	0	0.01	0	0.02	0	0	0.01	0.02	0	0	0.09	0	0	0	0	0	0.01	0	0	0	0.01	0	0.01	0.03	0	0	0	0.02	0	0.02	0.07	0.04	0.01	0.02	0.01	0.03	0.01	0.02	0	0.01	0.01	0	0.02	0	0	0	0.01
ENSMMUG00000001208	0.03	0.02	0.06	0.02	0.03	0.02	0.01	0.02	0.12	0.07	0.11	0.09	0.05	0.06	0.11	0.08	0.11	0.04	0.08	0.09	0.05	0.04	0.04	0.05	0.07	0.11	0.07	0.01	0.02	0.02	0.04	0.01	0.1	0.05	0.09	0.07	0.09	0.11	0.04	0.05	0.17	0.05	0.07	0.1	0.08	0.06	0.1	0.11	0.24
ENSMMUG00000001211	0.12	0.06	0.05	0.08	0.03	0.05	0.06	0.05	0.07	0.08	0.2	0.07	0.19	0.24	0.19	0.2	0.03	0.08	0.08	0.03	0.09	0.24	0.29	0.05	0.04	0.04	0.05	0.01	0.04	0	0.06	0.06	0	0.02	0.03	0.04	0	0.01	0	0.04	0.1	0.03	0.2	0.19	0.03	0.09	0.06	0.03	0.02
ENSMMUG00000001213	0.07	0.13	0.1	0.02	0.1	0.08	0.05	0.07	0.03	0.02	0.02	0.02	0.01	0	0.05	0.14	0.02	0.1	0.05	0.01	0.04	0.15	0.01	0.01	0.07	0.09	0.08	0.07	0.02	0.09	0.02	0.05	0.59	0.71	1.07	0.74	0.97	0.56	0.84	0.89	0.43	1.05	1.26	1.08	1	0.95	1.07	1.46	0.56
ENSMMUG00000001217	0.94	0.7	0.8	0.58	0.23	0.35	0.24	0.34	0.32	0.38	0.62	0.48	0.51	0.37	0.67	0.35	0.78	0.46	0.82	0.91	0.65	0.36	0.47	0.23	0.86	0.88	0.56	0.37	0.66	0.33	0.44	0.56	0.76	0.59	0.57	0.48	0.73	0.31	0.31	0.58	0.87	0.79	0.87	0.43	0.78	0.78	0.9	0.38	0.94
ENSMMUG00000001218	0.02	0.03	0.03	0.02	0.02	0.04	0.02	0.01	0	0.01	0.02	0.03	0.03	0.01	0.04	0.07	0.02	0.02	0.04	0.03	0.05	0.02	0.01	0	0.02	0.01	0.03	0.01	0.05	0.03	0.02	0.02	0.01	0.03	0.04	0.04	0	0.01	0	0.01	0.05	0.03	0.01	0.04	0.05	0.01	0.02	0.01	0.06
ENSMMUG00000001220	0.02	0.01	0.17	0.15	0.01	0.05	0.04	0.04	0.02	0.06	0.17	0.19	0.08	0.11	0.05	0.08	0.07	0.09	0.13	0.12	0.06	0.11	0.04	0.07	0.16	0.01	0.14	0.15	0.07	0.12	0.07	0.08	0.12	0.03	0.1	0.26	0.07	0.15	0.02	0.09	0.07	0.04	0.19	0.15	0.07	0.18	0.01	0.05	0.11
ENSMMUG00000001228	0.09	0.12	0.11	0.08	0.02	0.05	0.05	0.03	0.16	0.15	0.2	0.16	0.19	0.25	0.17	0.1	0.11	0.1	0.05	0.1	0	0.17	0.06	0.05	0.17	0.07	0.18	0.11	0.04	0.12	0.04	0.2	2.19	2.88	1.87	2.62	2.52	2.56	2.34	1.67	1.34	1.2	0.71	0.71	0.66	0.45	0.75	0.73	0.8
ENSMMUG00000001239	0.97	0.43	0.37	0.4	0.97	0.98	0.98	0.98	0.51	0.78	0.49	0.44	0.88	0.87	0.84	0.32	0.82	0.41	0.74	0.62	1.01	0.78	0.4	0.58	1	0.44	1.05	0.33	0.84	0.58	0.52	0.59	3.38	3.31	3.95	2.83	2.8	3.91	3.75	3.18	2.88	2.98	1.97	1.96	3.05	4.54	2.09	2.81	1.96
ENSMMUG00000001242	0.01	0.03	0	0.02	0.03	0.03	0.01	0.02	0.04	0.03	0.04	0.02	0.02	0.03	0.03	0.02	0.03	0.01	0.04	0.02	0.01	0.04	0.01	0.01	0.01	0.02	0.02	0.01	0.02	0.01	0	0.01	0.04	0.03	0.07	0.08	0.03	0.03	0.03	0.03	0.02	0.05	0.06	0.02	0.07	0.03	0.08	0	0.03
ENSMMUG00000001248	1.43	1.57	3.16	1.5	2.15	2.6	1.9	1.94	1.79	2.34	3.74	2.93	3.42	2.52	2.69	4.08	1.27	1.36	2.95	3.66	2.46	2.26	1.53	1.11	1.49	1.51	3.25	1.12	1.32	1.86	1.78	1.55	1.42	1.1	1.33	1.98	1.92	1.73	1.34	2.6	2.3	1.94	2.31	1.33	1.81	1.73	1.32	2.23	2.96
ENSMMUG00000001251	0.01	0.01	0.01	0	0.01	0.01	0	0.03	0	0.02	0	0.01	0	0	0.02	0	0.03	0.02	0	0.02	0	0	0	0	0	0.01	0	0	0.03	0.05	0	0	1.2	4.58	1.38	1.84	3.57	5.6	2.27	2.07	0	0.01	0	0	0	0.03	0.02	0	0
ENSMMUG00000001252	0.08	0	0.14	0	0.07	0.3	0	0	0	0.03	0.09	0	0	0.27	0	0.08	0	0	0.08	0	0	0.11	0	0	0	0	0.08	0	0.04	0.09	0	0	0.63	1.21	0.81	0.39	0.6	3.31	1.49	0.55	0	0	0.05	0	0.05	0	0	0	0
ENSMMUG00000001254	0.01	0.01	0.01	0.02	0.01	0.01	0.03	0.01	0.02	0.05	0.07	0.04	0.03	0.01	0.04	0.02	0.03	0.01	0.16	0.06	0.1	0.06	0.05	0.03	0.03	0.03	0.03	0.03	0.03	0.04	0.02	0.01	0.01	0.01	0.01	0.02	0.02	0	0.01	0.02	0.04	0.02	0.02	0.03	0.02	0.02	0.01	0	0.04
ENSMMUG00000001255	0.12	0.22	0.09	0.02	0.06	0.16	0.1	0.14	0.18	0.19	0.11	0.24	0	0.3	0.17	0.12	0.12	0.04	0.22	0.06	0	0.04	0.09	0.07	0.41	0.1	0.17	0.24	0.12	0	0	0.24	0.35	0.69	0.38	0.22	0	0.06	0.36	0.47	0	0.33	0	0.11	0.04	0.06	0.02	0	0.11
ENSMMUG00000001256	0.02	0.02	0.02	0.01	0.02	0.02	0.02	0.01	0	0.01	0	0.03	0	0	0.02	0.02	0.02	0.01	0.06	0.06	0	0.01	0	0.01	0	0.01	0.01	0	0.02	0.04	0.01	0.03	0.13	0.09	0.03	0.08	0.02	0.09	0.19	0.04	0.02	0	0	0	0.01	0.01	0.02	0	0.02
ENSMMUG00000001259	0	0.02	0.01	0.01	0.02	0.03	0.04	0.03	0.01	0.06	0.01	0.03	0.02	0.01	0.04	0.03	0.02	0.06	0.02	0.01	0	0.03	0.02	0.01	0.04	0.02	0.03	0	0.06	0.01	0.01	0.03	0.04	0.05	0.04	0.06	0.05	0.07	0.02	0.01	0.02	0.05	0.03	0.03	0.02	0.02	0	0	0.04
ENSMMUG00000001260	0.01	0.02	0.01	0.04	0.02	0.04	0.04	0.02	0.05	0	0.04	0.02	0.01	0	0.03	0.02	0.01	0.01	0.02	0.02	0.09	0.01	0.05	0.07	0.04	0.03	0.11	0.05	0.01	0.02	0.12	0	0.02	0	0.01	0.05	0.01	0.03	0.05	0.06	0	0.05	0.06	0.01	0.01	0.05	0.18	0.01	0.02
ENSMMUG00000001261	0.02	0.02	0.01	0.04	0.03	0.02	0	0.01	0.01	0.01	0.02	0.03	0	0.01	0.01	0.02	0.02	0.03	0.01	0.01	0.01	0.01	0	0.02	0.01	0	0.04	0.01	0.03	0	0.02	0.04	0.05	0.02	0.03	0.02	0	0.06	0.02	0.03	0.04	0.02	0.06	0.04	0.03	0.01	0.02	0.01	0.03
ENSMMUG00000001271	0.02	0.02	0.02	0.05	0.17	0.11	0.09	0.09	0.09	0.02	0	0.03	0.08	0.11	0.1	0.03	0	0	0.09	0.08	0	0	0.05	0.04	0	0	0.18	0	0.05	0.03	0.07	0.07	1.22	1.07	0.73	1.31	0.46	1.12	1.46	1.13	0.33	0.21	0.27	0.14	0.48	0.31	0.13	0.2	0.09
ENSMMUG00000001272	0.1	0.24	0.21	0.12	0.31	0.27	0.19	0.08	0.12	0.09	0.11	0.16	0.11	0.13	0.25	0.07	0.24	0.14	0.22	0.25	0.17	0.2	0.15	0.06	0.21	0.19	0.15	0.11	0.1	0.24	0.41	0.06	1.5	1.07	1.59	1.59	1.39	1.54	1.98	0.79	0.89	0.42	0.73	0.74	0.75	0.85	0.71	0.57	0.55
ENSMMUG00000001281	0	0	0	0	0	0	0	0	0	0	0	0	0	0	0	0	0	0	0	0	0	0	0	0	0	0	0	0	0	0	0	0	0.35	0.49	0.36	0.08	0.31	0.48	0.39	0.33	0.37	0.59	1.17	1.28	0.38	0.69	1.08	0.36	0.42
ENSMMUG00000001283	4	4.52	2.15	2.17	1.45	3.02	2.49	2.31	2.25	2.18	2.23	2.51	2.81	5.87	5.75	3.15	3.16	2.27	1.24	1.8	1.98	4.68	5.62	2.77	2.24	3.09	2.05	2.03	2.33	5.25	3.71	2.88	2.97	2.63	3.37	2.7	3.6	4.51	4.4	4.27	2.59	1.88	2.79	2.37	3.21	4.82	4.77	2.98	2.23
ENSMMUG00000001285	0.19	0.33	0.17	0.14	0.27	0.16	0.14	0.26	0.13	0.15	0.18	0.29	0.21	0.14	0.34	0.34	0.08	0.06	0.24	0.2	0.06	0.27	0.15	0.17	0.26	0.19	0.13	0.15	0.07	0.14	0.27	0.33	7.57	10.17	6.82	9.54	8.82	12.07	11.54	9.3	8.41	8.77	8.67	10.58	9.65	11.35	11.75	13.01	8.41
ENSMMUG00000001288	0.09	0.03	0.04	0.02	0.14	0.02	0.05	0.03	0.02	0.08	0.06	0.03	0.07	0.03	0.01	0.05	0.1	0.04	0.03	0.03	0.03	0.03	0.04	0.01	0.17	0.01	0.03	0.03	0.13	0.18	0.01	0.01	0.03	0.02	0.03	0.04	0.05	0.02	0.03	0.01	0.09	0.03	0.04	0.07	0.05	0.02	0.05	0.04	0.06
ENSMMUG00000001291	0.23	0.24	0.35	0.09	0.04	0.2	0.11	0.13	0.37	0.2	0.34	0.11	0.64	0.61	0.55	0.64	0.82	0.61	0.44	0.51	0.15	0.38	0.19	0.3	1.19	0.75	0.45	0	0.11	0.19	0.13	0.11	0.23	0.2	0.27	0.32	0.25	0.22	0.39	0.12	5.24	6.67	6	3.71	4.71	5.22	5.46	3.42	0.69
ENSMMUG00000001295	0	0.03	0	0	0	0	0.05	0	0.03	0.04	0.15	0.14	0.31	0.06	0	0	0	0	0.6	0	0.3	0.49	0.91	0.21	0.18	0.04	0.14	0	0	0	0.06	0	0	0	0	0	0	0	0.18	0	0.42	0.36	1.58	0.86	2.25	1.83	1.82	1.68	0.05
ENSMMUG00000001296	0.22	0.34	0.49	0.5	0.8	0.96	0.55	0.33	0.34	0.16	0.31	0.51	0.15	0.41	0.29	0.19	0.2	0.43	0.31	0.43	0.25	0.28	0.29	0.32	0.38	0.35	0.38	0.33	0.28	0.75	0.42	0.21	0.07	0.08	0.08	0.13	0.01	0.08	0.13	0.1	0.13	0.03	0.33	0.29	0.1	0.18	0.18	0.17	0.02
ENSMMUG00000001299	0.11	0.05	0.04	0.09	0.1	0.06	0.06	0.1	0.2	0.38	0.22	0.15	0.28	0.15	0.16	0.11	0.04	0.03	0.09	0.08	0.08	0.14	0.09	0.09	0.05	0.06	0.07	0.06	0.05	0.06	0.07	0.01	8.18	5.24	3.75	4.36	2.67	3.68	2.59	2.9	0.2	0.17	0.19	0.26	0.09	0.27	0.06	0.1	0.26
ENSMMUG00000001300	0.45	0.65	2.48	0.66	1.25	0.8	0.65	0.71	1.04	1.15	3.52	1.37	1.5	1.75	0.79	0.62	1	1.01	3.77	1.43	1.24	2.19	1.06	0.47	0.38	0.88	2.68	0.9	0.63	0.65	0.54	0.55	3.99	6.17	5.96	3.47	4.84	3.23	2.63	3.03	0.97	1.53	2.92	0.81	1.18	1.59	0.39	0.86	1.37
ENSMMUG00000001302	0.02	0.04	0.04	0.03	0.02	0.02	0.02	0.02	0.03	0.02	0.01	0.02	0	0.01	0.02	0.02	0.02	0.03	0.01	0.01	0.03	0.01	0.02	0.01	0.01	0.02	0.03	0.02	0.01	0.01	0.02	0.01	0.02	0.02	0.03	0.02	0.02	0	0.03	0.03	0.03	0.04	0.01	0.01	0.01	0.04	0.04	0.01	0.02
ENSMMUG00000001303	0	0	0.01	0	0.02	0	0	0	0	0	0	0.07	0	0	0	0.01	0	0	0	0.03	0	0.01	0	0	0	0.01	0	0.03	0	0	0	0.04	0	0.01	0.01	0.01	0	0.02	0.05	0.02	0	0	0	0	0	0	0.09	0	0
ENSMMUG00000001307	0.06	0.1	0.05	0.08	0.08	0.06	0.07	0.05	0.12	0.08	0.1	0.12	0.08	0.07	0.09	0.07	0.07	0.11	0.06	0.14	0.01	0.07	0.06	0.04	0.11	0.04	0.05	0.08	0.03	0.09	0.08	0.06	0.38	0.36	0.32	0.36	0.35	0.37	0.33	0.24	0.09	0.08	0.09	0.08	0.03	0.06	0.04	0.08	0.19
ENSMMUG00000001324	0.02	0.04	0.01	0.05	0.01	0.12	0.1	0.04	0.17	0.03	0.24	0.23	0.15	0.21	0.19	0.31	0.05	0.08	0.1	0.22	0.04	0.1	0.01	0.01	0.09	0.1	0.05	0.06	0.04	0.08	0.08	0.01	0.15	0.28	0.13	0.22	0.19	0.09	0.18	0.24	0.11	0.22	0.13	0.12	0.12	0.34	0.08	0.37	0.09
ENSMMUG00000001328	0.83	1.08	0.3	0.45	0.3	0.39	0.2	0.46	0.22	0.32	0.45	0.25	0.33	0.27	0.24	0.61	0.36	0.1	0.19	0.33	0.26	0.26	0.29	0.23	0.94	0.94	1.13	0.38	0.46	1.13	0.35	1.97	0.48	0.24	0.24	0.4	0.16	0.32	0.44	0.4	0.4	0.16	0.26	0.22	0.13	0.24	0.2	0.33	0.31
ENSMMUG00000001332	6.09	5.94	5.03	3.95	3.09	2.99	4.7	5.41	1.6	1.84	5.4	3.46	4.19	4.63	5.77	6.12	3.63	3.41	4.49	4.86	4.15	5.67	8.87	6.61	4.86	2.92	5.19	6.68	4.8	6.88	5.56	8.42	2.3	1.88	2.69	3	3.24	4.15	5.52	4	3.95	1.73	4.29	5.16	5.09	5.9	4.88	5.22	3.33
ENSMMUG00000001341	1.01	1.24	1.69	0.97	0.58	0.45	0.89	0.81	3.21	3.56	3.79	3.49	3.1	3.73	3.25	3.07	4.03	3.76	2.52	3.25	3.11	3.06	4.96	3.05	3.85	2.8	2.73	1.66	1.55	1.93	1.79	1.76	23.35	22.43	17.92	24.06	19.23	18.6	19.9	21.39	18.58	21.03	16.72	19.89	14.05	20	13.66	18.63	6.5
ENSMMUG00000001346	0.63	0.65	0.66	0.5	0.42	0.26	0.46	0.35	0.55	0.78	0.52	0.6	0.53	0.48	0.79	0.67	0.82	0.42	0.36	0.62	0.2	0.22	0.11	0.18	0.55	0.67	0.55	0.75	0.48	0.41	0.54	0.55	0.2	0.68	0.38	0.58	0.69	0.05	0.75	0.72	0.4	0.44	0.13	0.28	0.56	0.23	0.41	0.47	1.45
ENSMMUG00000001357	0.46	0.36	0.35	0.41	0.4	0.3	0.17	0.3	0.19	0.2	0.41	0.25	0.37	0.4	0.45	0.37	0.24	0.3	0.39	0.12	0.39	0.5	0.9	0.51	0.4	0.33	0.49	0.3	0.72	0.86	0.28	0.27	15.71	18.21	15.47	20.2	35.71	36.54	32.48	28.35	0.71	1.54	1.24	1.64	1.2	1.45	0.73	0.73	1.18
ENSMMUG00000001363	0	0	0.02	0.04	0.01	0	0	0.06	0.02	0.01	0.01	0.03	0.05	0.06	0	0.04	0	0.04	0	0.01	0	0	0	0.04	0.02	0.01	0.02	0.03	0.02	0.02	0	0.03	0.05	0.01	0	0.02	0.01	0.02	0.04	0.11	0.01	0.04	0.02	0.03	0.01	0	0	0.05	0.02
ENSMMUG00000001364	0	0.02	0.01	0.1	0.05	0.01	0.18	0.05	0	0	0	0.02	0	0.03	0.03	0	0	0.01	0.01	0	0.03	0.01	0.06	0.03	0	0.05	0.02	0.04	0.04	0.13	0	0	0.04	0.07	0.12	0.1	0.06	0.02	0.29	0.02	0.11	0.16	0	0	0	0.05	0.16	0	0.07
ENSMMUG00000001365	0.1	0.11	0.29	0.12	0.25	0.11	0.04	0.02	0.02	0.14	0.15	0.38	0.09	0.05	0.09	0.19	0.09	0.04	0.28	0.12	0	0.07	0	0.14	0.05	0.03	0.25	0.1	0.24	0.17	0.02	0.39	0.15	0.25	0.17	0.32	0.37	0.19	0.37	0.38	0.16	0.11	0.15	0.18	0.24	0.05	0.15	0.19	0.16
ENSMMUG00000001368	0	0	0	0.02	0.05	0	0.04	0	0.02	0	0	0.16	0	0.08	0.03	0.11	0.11	0	0	0	0	0.18	0.34	0.04	0	0.07	0.06	0.19	0	0	0.08	0.15	0	0.04	0.05	0	0.1	0.09	0.09	0.06	0.02	0	0	0.03	0.02	0	0	0.04	0.08
ENSMMUG00000001379	0.05	0.01	0.01	0.01	0.02	0.02	0.05	0.02	0.06	0	0	0	0.04	0	0.01	0.01	0	0.05	0	0.02	0.06	0.02	0.01	0	0	0	0	0.02	0	0.1	0	0	0.03	0.04	0.13	0.06	0.06	0.05	0.26	0.29	0.02	0.01	0.04	0.02	0.01	0.06	0	0	0
ENSMMUG00000001381	0.53	0.64	1.12	0.55	0.39	0.38	1.01	0.49	0.07	0.07	0.2	0.11	0.2	0.11	0.12	0.09	0.16	0.3	0.39	0.2	0.32	0.33	0.42	0.31	1.2	1.64	2.31	1.9	1.43	1.4	1.38	1.51	0.2	0.24	0.3	0.18	0.3	0.26	0.29	0.11	0.16	0.3	0.54	0.62	0.3	0.36	0.74	0.31	0.08
ENSMMUG00000001382	0.01	0.05	0.01	0.02	0	0	0.01	0.01	0.02	0.02	0	0	0	0.03	0	0.04	0.02	0.01	0.01	0	0.01	0	0.03	0	0.02	0.01	0.02	0.02	0.01	0.01	0.06	0	0.15	0.03	0.04	0.15	0.01	0	0	0.04	0.01	0.03	0.01	0.01	0.06	0.02	0	0	0
ENSMMUG00000001389	2.34	3.04	0.83	1.38	0.69	0.79	1.57	2.01	0.08	0.24	0.63	0.37	0.96	2.53	0.74	0.85	0.06	0	0.22	0.31	0.61	0.48	0.19	0.57	0.86	0.69	1.86	1.82	2.04	7.62	2.26	2.94	6.83	7.85	6.76	7.96	7.17	9.11	8.13	8.68	0.32	0.17	0.2	0.44	0.5	0.77	0.9	1.03	0.35
ENSMMUG00000001395	0.22	0.36	0.08	0.06	0.13	0.11	0.11	0.05	0.3	0.21	0.16	0.24	0.28	0.25	0.19	0.29	0.34	0.19	0.05	0.06	0.33	0.12	0.19	0.22	0.29	0.29	0.05	0.24	0.15	0	0.17	0.22	0.24	0.2	0.16	0.12	0.11	0.23	0.22	0.24	0.45	0.35	0.47	0.63	0.55	0.17	0.67	0.51	1.06
ENSMMUG00000001398	0.19	0.16	0.11	0.05	0.28	0.13	0.13	0.1	0.12	0.05	0.07	0.07	0.09	0.1	0.08	0.02	0.22	0.02	0.12	0	0.03	0.16	0.08	0.01	0.12	0.1	0.04	0.05	0.05	0.04	0.29	0.03	1.13	1.09	0.36	0.62	0.41	0.27	0.15	0.38	0.86	1.27	1.47	1.11	1.22	1.1	0.79	1.64	1.55
ENSMMUG00000001402	0.06	0.03	0.1	0.04	0.01	0.08	0.02	0.03	0.03	0.13	0.12	0.05	0.48	0.11	0.09	0.11	0.04	0.04	0.05	0.02	0.05	0.08	0.02	0.05	0.08	0.07	0.74	0.52	0.37	0.5	0.34	0.14	2.31	1.31	0.47	0.95	0.17	0.33	0.25	0.32	0.08	0.01	0.06	0.03	0.04	0.06	0.04	0.03	0.03
ENSMMUG00000001407	0.86	0.98	1.35	1.34	0.7	1.05	2.88	2.68	0.14	0.17	0.72	0.54	0.58	1.39	1.06	1.21	0.95	0.31	1.21	1.24	1.1	2.49	3.54	2.37	2.05	1.5	4.04	3.95	3.17	5.42	4.78	6.93	4.71	3.83	5.72	7.91	6.14	13.73	11.48	18.46	3.74	2.41	5.95	9.17	4.44	9.67	13.39	10.34	0.83
ENSMMUG00000001409	0.01	0.05	0.05	0.03	0.01	0.01	0.02	0.03	0.02	0.03	0.03	0.02	0.04	0.03	0.02	0.01	0.02	0.02	0	0	0.03	0	0	0	0.01	0.02	0.06	0.02	0.02	0.14	0.01	0.04	0.04	0.08	0.04	0.07	0.07	0.02	0.05	0.01	0	0.03	0.01	0.02	0.04	0.02	0.04	0.11	0.01
ENSMMUG00000001411	0	0	0	0	0	0	0	0	0	0	0	0	0	0	0	0	0	0	0	0	0	0	0	0	0	0	0	0	0	0	0	0	0.36	0.4	0.48	0.44	0.27	0.33	0.24	0.35	0.11	0.05	0.32	0.11	0.17	0.12	0.19	0.08	0.19
ENSMMUG00000001415	0.02	0.16	0.22	0.04	0.01	0.04	0.08	0.13	0.03	0.05	0.06	0.12	0.1	0	0.05	0.07	0.01	0.02	0.11	0.03	0.03	0.09	0.08	0.03	0.09	0.09	0.12	0	0.13	0.2	0.1	0.07	0.27	0.59	0.24	0.35	0.28	0.53	0.25	0.6	0.03	0	0.18	0.13	0.22	0.1	0.42	0.25	0.26
ENSMMUG00000001418	0.05	0.07	0.03	0.08	0.01	0.11	0.09	0.06	0.09	0.03	0.01	0.01	0.11	0.05	0.08	0.14	0	0.07	0.07	0.06	0.02	0.02	0.06	0.03	0.05	0.1	0.05	0.06	0.1	0.05	0.08	0.03	0.16	0.14	0.22	0.09	0.2	0.08	0.11	0.06	0.07	0.07	0.1	0.03	0.08	0.06	0.05	0.1	0.16
ENSMMUG00000001420	0.36	0.45	0.09	0.17	0.21	0.09	0.15	0.11	0.44	0.71	1.05	0.86	1.13	0.77	0.69	0.99	0.95	0.79	0.43	1.23	0.41	0.94	0.53	0.17	0.17	0.29	0.43	0.19	0.42	0.41	0.09	0.25	1.42	1.24	0.9	0.83	0.94	0.74	0.97	0.96	0.83	1.08	0.72	0.36	0.79	0.49	0.74	0.88	0.68
ENSMMUG00000001425	0.02	0.01	0.05	0.05	0.05	0.01	0.02	0.05	0.01	0	0	0.01	0	0	0	0.01	0.05	0	0.02	0.03	0	0.01	0	0.01	0.06	0.03	0	0.01	0	0.05	0.08	0	0.59	0.32	1.29	0.69	0.79	0.68	1.91	1	0.01	0.01	0	0.04	0	0.01	0	0.02	0.02
ENSMMUG00000001433	1.39	1.3	2.21	1.11	0.55	0.71	0.73	0.8	2.35	2.69	3.28	2.4	2.39	2.63	3.18	3.01	1.59	2.2	2.32	2.21	2.58	2.26	3.43	2.49	1.63	1.63	1.57	0.98	1.12	1.28	1.46	1.26	1.32	0.89	1.41	1.14	1.64	1.64	1.19	1.85	3.1	2.25	3.19	2.66	3.75	3.68	3.24	2.85	3.26
ENSMMUG00000001435	0.05	0.01	0.06	0.02	0.02	0.05	0.08	0.02	0.01	0.05	0	0.06	0.03	0.04	0.01	0.01	0.03	0.04	0	0.03	0.06	0.05	0.01	0	0.06	0.01	0.03	0.06	0	0.02	0.04	0	0.05	0.07	0.04	0.04	0.1	0.11	0.08	0.01	0.03	0.02	0.05	0.07	0.07	0.05	0	0.07	0.01
ENSMMUG00000001442	0	0	0	0	0.01	0.01	0	0	0.02	0.02	0	0	0.02	0	0.04	0	0.01	0.09	0.01	0	0	0	0	0	0	0.02	0	0	0.04	0	0	0.03	0.02	0	0.05	0	0	0.06	0.04	0	0.03	0.03	0	0.04	0.16	0	0	0.02	0
ENSMMUG00000001464	0.14	0.19	0.05	0.38	0.09	0.2	0.05	0.12	0.14	0.11	0.07	0.16	0.01	0	0.02	0.01	0.1	0.05	0.04	0	0.03	0	0.02	0	0.16	0.03	0.22	0.43	0.16	0.14	0.15	0.16	0.01	0.08	0.05	0.06	0	0.01	0.01	0.05	0.01	0.02	0	0.07	0	0.01	0.01	0.01	0.06
ENSMMUG00000001465	0.04	0.08	0	0	0.02	0.05	0	0	0	0.02	0.06	0	0	0	0	0.05	0	0	0	0	0	0	0	0.02	0.02	0.05	0	0.03	0	0.42	0	0	0	0	0	0	0	0	0	0	0.03	0	0	0.07	0	0	0.04	0	0.05
ENSMMUG00000001466	0.01	0.02	0	0.04	0.02	0.09	0.04	0.04	0.1	0.06	0.08	0	0.06	0.08	0.09	0.15	0.02	0.01	0.04	0.09	0.1	0.04	0.02	0.03	0.05	0.07	0.04	0	0	0.03	0.13	0.1	0.09	0.13	0.14	0.07	0.05	0.04	0.05	0.08	0.12	0.06	0.06	0.07	0.2	0.06	0.08	0.25	0.02
ENSMMUG00000001467	0.37	0.23	0.08	0.09	0.15	0.19	0.21	0.25	1.25	2.33	2.26	1.87	2.89	3.01	1.13	1.82	1.7	1.6	1.07	1.69	1.76	2.82	0.57	0.41	0.42	0.51	0.19	0.15	0.14	0.45	0.13	0.18	1.11	0.98	0.48	0.8	1.02	0.63	0.4	0.44	1.99	1.39	0.72	0.49	1.7	1.4	0.57	1.16	2.07
ENSMMUG00000001468	0.54	0.69	0.65	0.66	1.31	1.3	1.5	0.78	0.7	0.99	0.82	0.55	0.7	0.84	0.55	1.02	0.6	1.16	0.89	0.59	0.67	1.2	0.29	0.86	0.93	1.35	0.67	0.82	0.69	0.62	0.73	0.61	0.69	0.97	0.73	0.76	0.59	0.75	1.02	0.82	0.71	1.01	0.82	0.78	0.57	0.97	0.53	0.77	0.64
ENSMMUG00000001469	0	0.05	0.02	0.02	0.03	0.05	0	0.07	0.04	0	0.02	0.02	0.04	0.04	0	0.06	0.09	0	0.06	0.01	0	0.01	0.03	0	0.02	0.02	0	0.03	0.03	0	0.06	0	0.08	0.02	0	0.05	0.03	0.01	0.03	0.07	0.14	0.03	0.04	0.02	0	0.02	0	0.1	0.07
ENSMMUG00000001473	0.02	0	0.17	0.06	0.2	0.04	0.34	0.17	0.13	0.42	0.34	0.13	0.94	1.86	0.7	1.28	0.29	0.62	0.5	0.17	1.73	2.52	0.87	0.46	0.07	0.1	0.03	0.02	0.18	0.06	0.13	0.19	0.09	0.26	0.25	0.01	0.35	0.18	0.33	0.39	0.55	0.28	0.2	0.37	0.87	2.19	0.24	0.76	0.52
ENSMMUG00000001478	0.09	0.12	0.07	0.1	0.14	0.15	0.1	0.11	0.07	0.06	0.14	0.12	0.04	0.02	0.08	0.06	0.13	0.12	0.07	0.08	0.1	0.11	0.04	0.06	0.08	0.07	0.08	0.02	0.03	0.02	0.08	0.07	0.09	0.03	0.06	0.07	0.06	0.04	0.09	0.08	0.17	0.16	0.1	0.05	0.11	0.06	0.11	0.07	0.02
ENSMMUG00000001479	0.12	0.33	0.09	0.03	0.05	0.02	0.03	0.09	0.17	0.23	0.12	0.08	0.09	0.04	0.04	0.09	0.09	0.09	0.13	0.11	0.11	0.02	0.1	0.03	0.05	0.09	0.03	0.05	0.07	0.08	0.14	0.09	0.25	0.14	0.13	0.11	0.17	0.11	0.1	0.06	0.12	0.19	0.34	0.1	0.18	0.22	0.11	0.16	0.13
ENSMMUG00000001485	0.21	0.42	0.35	0.21	0.49	0.38	0.37	0.48	0.91	0.64	1.29	0.85	0.43	0.34	0.73	0.65	0.22	0.54	0.65	0.37	0.17	0.17	0.36	0.32	0.55	0.18	0.45	0.27	0.34	0.41	0.41	0.27	0.71	0.24	0.21	0.22	0.27	0.1	0.55	0.39	4.42	3.29	3.54	1.75	1.6	1.55	1.27	1.8	2.51
ENSMMUG00000001487	0.2	0.12	0.1	0.12	0.29	0.06	0.24	0.27	0.42	0.22	0.12	0.16	0.26	0.17	0.15	0.23	0.3	0.2	0.34	0.21	0.22	0.28	0	0.22	0.38	0.27	0.27	0.56	0.25	0.08	0.09	0.09	0.1	0	0.01	0.06	0	0	0.02	0.11	0.81	0.33	0.34	0.2	0.03	0.33	0.55	0.13	0.3
ENSMMUG00000001495	0.05	0.02	0.04	0.02	0.07	0.04	0.07	0.03	0.03	0.05	0.08	0.04	0.03	0.01	0.04	0.02	0.04	0.03	0.05	0.04	0.05	0.09	0.04	0.06	0.07	0.11	0.03	0.05	0.02	0.04	0.08	0.11	0.09	0.06	0.04	0.01	0.03	0.03	0.07	0.05	0.06	0.09	0.02	0.01	0.04	0.02	0.03	0.02	0.03
ENSMMUG00000001496	0.19	0.11	0.1	0.1	0.16	0.4	0.35	0.32	0.24	0.12	0.07	0.14	0.11	0.28	0.09	0.13	0.12	0.07	0.18	0.08	0.07	0.23	0.01	0.13	0.11	0.3	0.21	0.04	0.06	0.37	0.2	0.15	0.78	0.91	2.79	1.18	1.18	1.18	1.02	0.73	0.68	1.09	1.29	0.78	0.92	1.16	0.34	0.41	1.05
ENSMMUG00000001498	0.4	0.17	0.61	0.49	0.12	0.05	0.21	0.33	0.24	0.51	1.63	1.28	1.85	1.69	1.28	1.41	0.67	0.57	1.55	1.49	0.36	1.14	1.25	0.89	0.37	0.58	0.74	0.4	0.61	0.6	0.39	0.51	0.54	0.8	1.28	1.16	0.77	1.14	1.17	1.15	0.63	0.39	1.48	0.85	1.08	1.41	0.93	1.11	0.8
ENSMMUG00000001502	0	0.02	0.03	0	0.01	0.01	0.02	0	0.09	0.1	0.09	0.13	0.18	0.12	0.07	0.09	0.14	0.05	0	0.11	0.18	0.09	0.08	0.01	0.06	0.07	0.02	0.02	0.06	0.15	0	0	0.04	0.01	0.05	0.04	0	0.02	0	0.03	0.08	0.02	0.03	0.12	0.11	0.1	0.07	0	0.12
ENSMMUG00000001503	0.14	0.01	0.38	0.01	0	0.04	0.01	0.1	0.79	0.49	0.56	0.52	0.63	0.36	0.61	0.49	0.31	0.04	0.07	0.06	0.04	0.05	0.2	0.22	0.62	0.32	0.29	0.05	0.02	0.08	0.19	0.03	0	0	0.03	0.02	0	0	0	0.01	0.06	0.31	0.27	0.19	0.13	0.12	0.21	0.39	0.27
ENSMMUG00000001505	0	0.01	0.03	0	0.02	0.01	0	0.01	0.01	0.01	0.01	0.01	0	0.01	0.01	0.01	0.02	0	0.03	0	0	0.02	0.03	0	0	0.07	0.01	0.01	0.01	0.01	0	0	0	0.03	0.07	0.05	0.01	0.01	0.01	0.02	0	0.01	0	0.02	0	0	0	0.02	0.01
ENSMMUG00000001511	0.04	0.01	0	0.02	0.03	0.04	0.03	0.04	0.01	0.05	0.01	0.04	0.04	0.01	0.03	0.02	0.04	0.01	0	0	0	0	0.02	0	0.04	0.04	0.03	0.03	0.02	0.02	0.07	0	0.01	0.02	0.01	0.01	0.04	0.01	0.05	0.02	0.08	0.01	0.03	0	0.02	0	0.06	0.02	0.02
ENSMMUG00000001514	0.08	0.11	0.12	0.14	0.16	0.24	0.05	0.07	0.12	0.04	0.08	0.1	0.07	0.11	0.05	0.04	0.05	0.07	0.07	0.06	0.03	0.1	0.09	0.03	0.04	0.09	0.06	0.09	0.01	0.04	0.08	0.05	0.17	0.27	0.14	0.18	0.3	0.33	0.22	0.25	0.03	0.12	0.14	0.1	0.12	0.08	0.05	0.13	0.03
ENSMMUG00000001519	0.08	0.04	0.14	0.02	0	0.04	0.1	0.07	0.03	0.08	0.07	0	0.01	0.03	0.02	0.01	0.14	0.11	0.09	0.01	0.01	0	0.09	0.04	0.16	0.09	0.27	0.08	0.01	0.03	0.13	0.07	0.08	0.04	0.07	0.01	0	0.01	0.01	0.01	0.01	0.04	0.07	0.03	0	0	0.02	0	0.03
ENSMMUG00000001520	0.02	0.05	0.07	0.01	0.01	0	0	0	0.02	0.03	0.04	0	0.04	0.07	0.01	0	0	0.04	0.08	0.01	0.02	0.01	0.02	0.01	0.01	0.01	0.1	0.07	0.02	0.06	0.01	0	0.09	0.01	0.03	0.04	0.03	0.04	0.01	0.04	0	0.02	0.01	0	0	0.01	0.03	0.01	0.01
ENSMMUG00000001521	0.05	0.02	0.07	0.03	0.06	0.04	0.03	0.07	0.09	0.06	0.08	0.1	0.08	0.13	0.09	0.11	0.07	0.1	0.05	0.04	0.01	0.13	0.1	0.18	0.05	0.03	0.05	0.01	0.03	0.04	0.01	0.03	2.6	1.61	2.01	3.42	1.98	0.83	2.25	0.68	0.18	0.2	0.08	0.06	0.21	0.22	0.06	0.2	0.28
ENSMMUG00000001522	0.06	0.11	0.27	0.25	0.07	0.12	0.2	0.1	0.27	0.18	0.48	0.45	0.36	0.76	0.73	0.5	0.13	0.29	0.29	0.56	0.05	0.36	0.12	0.36	0.08	0.09	0.12	0.02	0.05	0.13	0.14	0.05	3.57	3.63	1.47	5.75	4.41	2.8	6.7	5.55	0.19	0.52	0.02	0.38	0.66	0.48	0.08	0.79	0.9
ENSMMUG00000001556	0	0.11	0.03	0.12	0.12	0.06	0.15	0	0.12	0.08	0.17	0	0.34	0.46	0.04	0.05	0.06	0.06	0.09	0.17	0.2	0	0.03	0	0.04	0.12	0.1	0	0.09	0.23	0.25	0	0.08	0.27	0.28	0.35	0.59	0.58	0	0.28	0.06	0	0.03	0	0.15	0	0.22	0.04	0.25
ENSMMUG00000001558	8.68	9.92	11.43	8.94	4.75	4.13	8.56	7.13	5.66	7.8	7.74	8.39	9.19	10.3	8.26	6.35	8.89	7.55	9.07	8.83	7.84	9.33	11.64	9.14	14.41	13.49	22.95	21.79	20.31	29.96	17.02	25.38	4.3	3.61	4.64	5.48	5.47	5.35	6.5	6.28	7.97	6.19	10.33	11.84	10.81	10.85	11.96	11.3	10.52
ENSMMUG00000001569	1.41	0.79	0.66	0.44	0.75	0.26	0.51	0.84	0.74	0.26	0.28	0.36	0.26	0.14	0.49	0.81	0.41	0.7	0.26	0.5	0.53	0.4	0.66	0.53	1.02	0.94	0.73	0.98	0.35	0.6	0.63	0.94	0.61	0.48	0.41	0.5	0.66	0.85	0.48	1.01	0.45	1.07	0.58	0.6	0.7	0.86	0.74	1.08	0.99
ENSMMUG00000001577	0.01	0.01	0	0	0.06	0.04	0.01	0.03	0	0.01	0	0.02	0.01	0.01	0.01	0.01	0	0.01	0	0	0.01	0	0	0	0.03	0.04	0.06	0.02	0.13	0	0.02	0.04	1.75	1.51	1.94	1.78	1.61	3.4	2.09	1.91	0.02	0	0	0.01	0	0	0.01	0	0.02
ENSMMUG00000001579	0.41	0.8	0.51	0.38	0.16	0.16	0.17	0.09	0.45	0.5	0.25	0.52	0.23	0.19	0.27	0.13	0.34	0.53	0.48	0.31	0.3	0.07	0.13	0.07	0.27	0.46	0.18	0.37	0.25	0.16	0.27	0.08	0.67	0.93	0.74	0.89	0.31	0.2	0.24	0.28	0.64	0.96	0.56	0.57	0.18	0.31	0.27	0.27	0.53
ENSMMUG00000001580	0.8	0.8	0.66	0.94	0.44	0.67	0.67	0.56	0.76	1.17	1.05	0.9	0.79	0.72	0.87	0.94	0.97	0.6	0.96	0.85	0.63	0.79	0.61	0.85	0.82	0.61	0.54	0.77	0.61	0.43	0.63	0.55	13.78	13.84	20.09	14.67	17.68	24.19	9.83	27.45	13.71	16.39	12.32	8.18	8.08	11.68	4.64	8.07	8.29
ENSMMUG00000001583	0.14	0.14	0.21	0.17	0.15	0.16	0.08	0.15	0.32	0.24	0.19	0.21	0.37	0.26	0.39	0.26	0.23	0.24	0.25	0.07	0.06	0.19	0.25	0.08	0.28	0.5	0.29	0.32	0.15	0.3	0.32	0.19	0.46	0.85	0.25	0.86	0.4	0.47	0.19	0.18	0.45	0.52	0.34	0.63	0.72	0.37	0.38	0.31	0.52
ENSMMUG00000001588	0.06	0.06	0.08	0.11	0.08	0.01	0.03	0.02	0.1	0.3	0.07	0.09	0.21	0.06	0.08	0.12	0.12	0.15	0.19	0.05	0.19	0.21	0.05	0.17	0.11	0.14	1.52	1.13	0.86	0.25	0.34	0.02	1	0.84	0.76	0.62	0.35	0.24	0.26	0.31	0.23	0.05	0.1	0.05	0.24	0.09	0.06	0.04	0.12
ENSMMUG00000001589	0.01	0.02	0.01	0.02	0.01	0.07	0.01	0.01	0.03	0.05	0.01	0.03	0	0.01	0	0	0.03	0	0.01	0.09	0.01	0	0.01	0.02	0.03	0	0	0.02	0	0.03	0	0	0	0.03	0.01	0.06	0.14	0.02	0.08	0.03	0.05	0.08	0.17	0.11	0.12	0.08	0.11	0.1	0.16
ENSMMUG00000001591	0	0	0	0	0	0	0	0	0	0	0	0	0	0	0	0	0	0	0	0	0	0	0	0	0	0	0	0	0	0	0	0	0.05	0.04	0	0.03	0.12	0.04	0.02	0.02	0	0	0.07	0.07	0.02	0	0.01	0	0
ENSMMUG00000001593	0.1	0.02	0.18	0.15	0.1	0.09	0.07	0.04	0.03	0.1	0.08	0.1	0.1	0.01	0.06	0.07	0.15	0.02	0.1	0.12	0.14	0.06	0.09	0.11	0.21	0.06	0.03	0.07	0.23	0.07	0.06	0.03	0.19	0.32	0.2	0.32	0.22	0.21	0.22	0.29	0.27	0.4	0.35	0.4	0.32	0.2	0.32	0.31	0.18
ENSMMUG00000001597	0	0.05	0	0.05	0.01	0.02	0.01	0.02	0	0.09	0.02	0.06	0.05	0	0	0	0.05	0.11	0	0.01	0	0.13	0	0.01	0.05	0	0.09	0	0.03	0	0	0.09	0.19	0.17	0.14	0.19	0.09	0.13	0.03	0.18	0.16	0.02	0.02	0.08	0.06	0.02	0.05	0.13	0.07
ENSMMUG00000001607	0.5	0.8	0.36	0.33	0.27	0.33	0.41	0.31	0.44	0.77	0.44	0.74	0.67	0.67	0.89	0.63	0.26	0.25	0.32	0.3	0.21	0.25	0.36	0.28	0.33	0.45	0.33	0.31	0.29	0.24	0.42	0.36	1.01	1.27	0.9	0.85	0.75	0.87	0.81	1.08	0.64	0.48	0.51	0.56	0.53	0.56	0.58	0.46	0.43
ENSMMUG00000001617	0.03	0.01	0.01	0	0.02	0	0.08	0	0.01	0	0.01	0.03	0.05	0.02	0	0.01	0	0	0	0	0.05	0	0.02	0	0.02	0.05	0.01	0.14	0.01	0	0	0	4.26	2.59	0.74	1.52	0.34	0.34	0.35	0.46	0.07	0.05	0.05	0.03	0.02	0.03	0.01	0.16	0.07
ENSMMUG00000001618	0.01	0.02	0	0	0.02	0	0	0	0	0.09	0	0	0.01	0.03	0	0	0.02	0.01	0.07	0.01	0.06	0.04	0	0.02	0.05	0.06	0.03	0.04	0.05	0	0	0	0.11	0.39	0.28	0.07	0.2	0.07	0.11	0.12	0.03	0.04	0.1	0.03	0.03	0.02	0.02	0.01	0.03
ENSMMUG00000001620	0.29	0.29	0.43	0.11	0.31	0.14	0.06	0.18	0	0.02	0.32	0	0.01	0.01	0.03	0.01	0.07	0.03	0.43	0	0	0.01	0.01	0	0.02	0.02	0.31	0.04	0.09	0.03	0	0.12	0.03	0.03	0.32	0.03	0.01	0.02	0.04	0.06	0.04	0.05	0.2	0.03	0.01	0.07	0.03	0.01	0
ENSMMUG00000001625	0.41	0.47	0.68	0.2	0.25	0.22	0.65	0.41	0.75	0.57	0.71	0.91	0.53	0.78	0.72	0.54	0.47	0.59	0.46	0.4	0.44	0.48	0.75	0.53	0.55	0.78	0.49	0.24	0.44	0.65	1.05	0.79	15.87	15.34	4.31	9.48	3.32	2.51	3.66	2.04	2.68	4.58	3.5	4.51	2.52	2.92	6.69	3.92	7.11
ENSMMUG00000001631	0.1	0.04	0.12	0.12	0.16	0.13	0.11	0.02	0.12	0.18	0.11	0.05	0.13	0.26	0.1	0.11	0.06	0.02	0.13	0.1	0.1	0.18	0.08	0.02	0.05	0.23	0.11	0.07	0	0.29	0.07	0.25	9.73	8.89	7.72	8.8	6.07	6.3	7.46	7.41	1.08	1.14	0.87	0.82	1.44	0.94	1.14	1.33	1.28
ENSMMUG00000001639	0	0	0	0	0	0	0	0	0	0	0	0	0	0	0	0	0	0	0	0	0	0	0	0	0	0	0	0	0	0	0	0	0.05	0.07	0.1	0.07	0.16	0.14	0.13	0.11	0.19	0.2	0.27	0.21	0.1	0.11	0.14	0.1	0.23
ENSMMUG00000001640	0.11	0.06	0.23	0.1	0.1	0.15	0.12	0.09	0.08	0.04	0.2	0.15	0.16	0.11	0.11	0.13	0.12	0.06	0.21	0.12	0.07	0.1	0.09	0.03	0.07	0.14	0.14	0.06	0.01	0.15	0.15	0.1	0.32	0.23	0.67	0.2	0.33	0.27	0.44	0.48	0.54	0.18	0.84	0.33	0.63	0.59	0.29	0.52	0.11
ENSMMUG00000001648	0.86	1.02	1.21	1.06	0.58	0.76	1	0.79	0.56	0.49	1.06	0.72	0.42	0.62	0.45	0.32	0.45	0.59	0.87	1.12	0.58	0.42	0.34	0.62	0.55	0.68	0.8	0.7	0.63	0.87	1.19	1.05	0.74	0.6	0.69	0.52	0.56	0.78	0.45	0.86	0.39	0.41	1.01	0.77	0.53	0.73	0.66	0.72	0.84
ENSMMUG00000001649	0.04	0.03	0.08	0.03	0.02	0.04	0.06	0.06	0.05	0.05	0.09	0.05	0.06	0.06	0.07	0.03	0.07	0.04	0.07	0.05	0.11	0.07	0.01	0.01	0.04	0.05	0.14	0.08	0.04	0.07	0.05	0.08	0.73	0.72	0.69	0.88	0.82	0.84	1.09	1.09	0.56	0.41	0.46	0.24	0.35	0.43	0.34	0.3	0.5
ENSMMUG00000001651	0	0	0	0.01	0	0	0.01	0.01	0	0	0	0	0	0	0.01	0	0	0.01	0	0	0	0	0	0	0	0	0	0	0	0	0	0	0.06	0.07	0.01	0	0.03	0.01	0	0.01	0.01	0	0	0.01	0.02	0.01	0	0	0
ENSMMUG00000001652	0.35	0.6	0.05	0.03	0.01	0.06	0.01	0.03	0.02	0.05	0.01	0.12	0.02	0.03	0.03	0	0.04	0.06	0	0.01	0.02	0.01	0.06	0	0.09	0.05	0.01	0.03	0.02	0.07	0.03	0.12	0.21	0.65	0.06	0.12	0.08	0.09	0.09	0.01	0.34	0.22	0.06	0.08	0.1	0.08	0.06	0.08	0.05
ENSMMUG00000001656	0.09	0.05	0.02	0.09	0.02	0.03	0.08	0.22	0.08	0.09	0.06	0.04	0.07	0.04	0.1	0.45	0.11	0.07	0.06	0.04	0.34	0.09	0.18	0.19	0.02	0.2	0.04	0.06	0.06	0.05	0.04	0.26	0.74	0.59	0.23	0.47	0.2	0.19	0.23	0.24	0.13	0.04	0.06	0.01	0.14	0.05	0.26	0.49	0.13
ENSMMUG00000001657	4.09	5.17	6.05	4.02	2.37	2.19	3.08	3.26	3.15	4.45	6.1	3.89	2.75	2.42	3.44	3.8	4.69	5.72	5.7	4.02	2.52	2.1	3.7	2.09	4.51	5.9	9.47	6.2	4.92	5.77	5.18	8.03	2.89	3.17	3.37	2.5	2.43	1.74	2.17	2.71	4.55	3.71	5.76	3.54	3.32	2.25	3.67	4.41	5.03
ENSMMUG00000001660	0.05	0.09	0.01	0	0.23	0	0.12	0.06	0.04	0	0.03	0	0.15	0.07	0.06	0	0.02	0.07	0.05	0.06	0.08	0.03	0.06	0.03	0	0.02	0.13	0	0.14	0.11	0.16	0.12	0.05	0.11	0.04	0.06	0	0.02	0	0.17	0.01	0.13	0.05	0.04	0	0.05	0.06	0.09	0.08
ENSMMUG00000001663	1.05	1.21	1.38	1.01	1.25	1.26	1.17	1.14	2.31	1.95	1.75	2.17	1.65	1.64	1.51	2.02	0.93	0.92	1.25	1.45	0.87	1.31	1.05	1.17	1.11	1.26	1.12	1.08	0.96	1.49	0.97	1.51	90.02	84.23	83.79	68.36	51.16	46.03	56.29	44.45	183	219.71	118.44	119.91	107.45	130.75	91.5	94.61	122.93
ENSMMUG00000001664	0.03	0.01	0.01	0.01	0.04	0.02	0.02	0.02	0.01	0.05	0.02	0	0.01	0.03	0	0.01	0	0.03	0	0	0.04	0.01	0	0.02	0	0.02	0	0.02	0.02	0.01	0.02	0.04	0.05	0.04	0.01	0.06	0.02	0	0.04	0.02	0	0.03	0.04	0.04	0.01	0.02	0	0.01	0.02
ENSMMUG00000001668	1.52	2	1.31	2.17	1.65	1.88	1.46	2.42	1.84	1.3	1.23	1.76	1.61	1.16	2.08	1.97	1.34	1.77	1.07	1.61	1.73	1.26	1.28	0.97	0.87	2.07	0.81	1.97	1.61	1.42	2.11	2.08	5.18	6.97	3.19	7.02	6.04	3.5	5.32	5.4	4.57	7.18	2.26	3.59	3.83	2.4	3.79	3.84	4.9
ENSMMUG00000001672	0.02	0.02	0.01	0.01	0.02	0.04	0.01	0.03	0.02	0.04	0	0.03	0	0.01	0	0.02	0.05	0.02	0.04	0	0.01	0	0.01	0	0.02	0.02	0	0.01	0.01	0	0	0	0.01	0.04	0.06	0.06	0	0.02	0.01	0.03	0	0.02	0.01	0.09	0.03	0.01	0.01	0.02	0.01
ENSMMUG00000001674	0.72	0.9	0.82	0.53	0.71	0.82	0.96	1.21	1.47	1.05	1.49	1.26	1.24	1.63	1.43	1.6	0.95	0.7	1.44	1.37	1.01	1.2	1.62	1.65	0.92	0.98	0.79	0.86	0.87	1.11	1.14	1.09	94.48	100.23	83.53	68.61	36.64	43.29	45.23	38.74	49.84	59.14	38.72	42.75	39.71	42.61	35.3	33.64	47.91
ENSMMUG00000001676	0.34	0.4	0.84	0.09	0.1	0.19	0.07	0.14	0.22	0.47	0.39	0.2	0.06	0.3	0.22	0.17	0.21	0.16	0.5	0.37	0.15	0.25	0.1	0.19	0.41	0.34	0.92	0.22	0.11	0.73	0.09	0.1	0.28	0.37	0.7	0.24	0.09	0.18	0.3	0.4	0.24	0.39	0.73	0.15	0.18	0.24	0.17	0.13	0.4
ENSMMUG00000001678	1.87	1.32	0.39	0.85	0.15	0.09	0.64	0.22	0.26	0.23	0.11	0.02	0	0.02	0.04	0.05	0.06	0.1	0.01	0.02	0.01	0.02	0.07	0	1.36	1.75	3.84	2.21	2.23	4.95	1.22	1.76	0.05	0.11	0.05	0.08	0.29	0.05	0.03	0.02	0	0.07	0.01	0.03	0.07	0.02	0	0	0.16
ENSMMUG00000001683	0.1	0.12	0.09	0.15	0.15	0.11	0.18	0.07	0.1	0.09	0.09	0.19	0.11	0.07	0.2	0.22	0.12	0.09	0.15	0.17	0.15	0.18	0.1	0.04	0.1	0.04	0.17	0.09	0.1	0.12	0.12	0.14	0.38	0.42	0.44	0.82	0.37	0.5	0.68	0.69	0.05	0.1	0.07	0.1	0.06	0.11	0.07	0.12	0.08
ENSMMUG00000001684	0	0	0	0	0	0	0	0	0	0	0	0	0	0	0	0	0	0	0	0	0	0	0	0	0	0	0	0	0	0	0	0	0.16	0.2	0.04	0.16	0.12	0.03	0.08	0.03	0.33	0.32	0.1	0.17	0.15	0.2	0.08	0.09	0.45
ENSMMUG00000001688	0.05	0.05	0	0.22	0.08	0.01	0.02	0.01	0.05	0.1	0	0.06	0.04	0	0	0.21	0.04	0	0	0.15	0	0.03	0.07	0	0.05	0	0	0.17	0.08	0.07	0.13	0.05	0.02	0.04	0.03	0.09	0.04	0	0.19	0.31	0	0	0	0.24	0.17	0	0.03	0.07	0
ENSMMUG00000001692	0.43	0.18	0.36	0.3	0.14	0.37	0.33	0.55	0.52	0.27	0.13	0.38	0.08	0.21	0.48	0.22	0.12	0.28	0.9	0.31	0.22	0.21	0.07	0.37	0.41	0.22	0.81	0.63	0.26	0.36	0.1	0.29	0.46	0.77	1.12	0.38	0.48	0.24	0.16	0.34	0.1	0.29	0.38	0.2	0.37	0.32	0.59	0.33	0.6
ENSMMUG00000001695	0.1	0.08	0.19	0.07	0.06	0.11	0.09	0.05	0.38	0.29	0.94	0.47	0.89	0.69	0.58	0.63	0.49	0.16	0.83	0.35	0.67	0.89	0.63	0.73	0.15	0.16	0.14	0.11	0.09	0.09	0.25	0.1	0.11	0.18	0.17	0.07	0.21	0.16	0.2	0.11	0.57	0.37	0.57	0.52	0.7	0.67	0.34	0.22	0.27
ENSMMUG00000001696	0	0	0.03	0	0.06	0	0.04	0.02	0.01	0	0.04	0	0	0.02	0.01	0.05	0	0	0.01	0	0.02	0.06	0	0.06	0.03	0.01	0.05	0.01	0	0	0.02	0	0.03	0.05	0	0	0.03	0.08	0.04	0.01	0	0.01	0.05	0	0.02	0.01	0	0	0.01
ENSMMUG00000001697	10.86	9.68	8.46	9.6	6.03	5.27	3.44	2.95	2.24	2.16	4.02	3.45	3.28	2.86	2.67	2.57	1.42	1.79	2.96	2.85	2.94	2.31	3.26	3.03	6.07	23.23	17.83	10.46	10.85	9.25	4.61	4.44	3.12	3.77	3.68	2.93	3.61	2.93	2.98	3.14	4.62	5.32	5.58	5.11	5.44	4.6	5.1	4.88	2.36
ENSMMUG00000001698	0	0	0	0	0	0	0	0	0	0	0	0	0	0	0	0	0	0	0	0	0	0	0	0	0	0	0	0	0	0	0	0	0	0.07	0	0	0	0.02	0.02	0.04	0.16	0.12	1.22	0.05	0.27	0	0.24	0.42	0
ENSMMUG00000001699	0.07	0.15	0	0.01	0.02	0.17	0.03	0.08	0.02	0.13	0.11	0.08	0.03	0	0.09	0.02	0.03	0.17	0.05	0.04	0.14	0.03	0	0	0.08	0.08	0	0.14	0.12	0	0.06	0.16	1.84	1.43	1.37	2.18	1.35	1.3	1.08	2.15	0.29	0.24	0.23	0.3	0.18	0.02	0.23	0.13	0.36
ENSMMUG00000001705	0.25	0.26	0.25	0.22	0.13	0.1	0.14	0.09	0.25	0.23	0.23	0.22	0.25	0.21	0.32	0.22	0.25	0.33	0.19	0.22	0.06	0.11	0.12	0.08	0.32	0.38	0.21	0.18	0.16	0.17	0.2	0.29	3.79	3.66	3.71	3.81	2.8	2.83	3.22	3.31	0.41	0.37	0.29	0.19	0.34	0.35	0.23	0.35	0.26
ENSMMUG00000001709	0.01	0.01	0.04	0.01	0	0.11	0	0.02	0	0.03	0.02	0.05	0.03	0.05	0.01	0.02	0.03	0	0.03	0.01	0	0.15	0.01	0	0	0.03	0.05	0	0	0.06	0	0.02	0.09	0.03	0.07	0.03	0.04	0.03	0.04	0.07	0	0	0.09	0.02	0.12	0.12	0.01	0	0
ENSMMUG00000001710	0.55	0.26	0.61	0.73	0.42	0.28	0.55	0.22	0.56	0.68	0.42	0.6	0.88	0.48	0.67	0.66	0.79	0.58	0.75	0.71	0.96	0.66	0.55	0.53	0.35	0.46	0.6	0.31	0.73	0.54	0.37	0.28	0.26	0.12	0.31	0.25	1.54	0.26	0.56	0.07	1.43	0.63	0.62	1.13	1.35	0.78	1.21	0.61	1.11
ENSMMUG00000001716	0.03	0	0	0.02	0	0.15	0	0	0	0	0	0	0	0	0	0.04	0.02	0	0.03	0	0	0.29	0.02	0.05	0	0	0	0.04	0	0	0	0	0	0.03	0.1	0	0.04	0.12	0.12	0.16	0.02	0	0	0	0	0.19	0.03	0	0
ENSMMUG00000001721	0.1	0.07	0.16	0.09	0.07	0.12	0.07	0.12	0.17	0.56	0.24	0.32	0.87	0.34	0.27	0.35	0.27	0.22	0.23	0.18	0.43	0.19	0.18	0.34	0.15	0.21	2.12	1.33	1.04	0.51	0.56	0.33	1.12	0.81	0.98	0.7	0.26	0.4	0.31	0.42	0.17	0.11	0.15	0.13	0.14	0.18	0.09	0.12	0.2
ENSMMUG00000001726	0	0.01	0.01	0.02	0.07	0.01	0.02	0.02	0.02	0.02	0.06	0.02	0.09	0.03	0.03	0.03	0.01	0.01	0.06	0.05	0.01	0.02	0	0.03	0.02	0.02	0.08	0.01	0.19	0.06	0.01	0	0.03	0.2	0.06	0.18	0.4	0.09	0.18	0.07	0.01	0.21	0.02	0.07	0.19	0.05	0.1	0.09	0.08
ENSMMUG00000001736	0.02	0.07	0.07	0.11	0.03	0.04	0.01	0	0.01	0	0	0	0	0	0.01	0	0	0	0	0	0	0	0	0	0.01	0.05	0.06	0.11	0.01	0	0	0.04	0	0	0.01	0	0.05	0.03	0	0	0.01	0	0.01	0	0.04	0.05	0	0	0.01
ENSMMUG00000001738	0	0	0	0.02	0	0	0	0.02	0.07	0	0.03	0	0	0	0	0	0	0	0.02	0.07	0	0	0.04	0	0.02	0	0	0.07	0	0	0	0	0	0	0	0.08	0	0.03	0	0	0.31	0	0.02	0.22	0	0	0.16	0	0
ENSMMUG00000001742	0.87	0.74	0.71	0.57	0.91	0.81	0.66	0.9	0.76	1	1.54	1.29	2.05	1.71	1.56	1.6	0.67	0.88	1.2	1.11	1.18	1.5	0.86	0.85	0.6	0.71	0.88	0.57	0.91	1.2	1.21	0.93	2.45	2.64	2.07	1.98	2.89	2.18	2.43	2.26	2.21	2.7	2.57	1.85	3.1	3.75	3.11	2.68	2.09
ENSMMUG00000001746	0	0	0	0	0	0	0	0	0	0	0	0	0	0	0	0	0	0	0	0	0	0	0	0	0.01	0.01	0	0	0	0	0	0.02	0.02	0	0.01	0	0.03	0.01	0	0	0	0.01	0	0.03	0	0.08	0	0	0.03
ENSMMUG00000001751	0.01	0.01	0.01	0	0	0.03	0	0.01	0.02	0	0.02	0	0	0	0	0	0	0	0.03	0.01	0.01	0.02	0	0.03	0	0	0	0	0	0	0.04	0	0.15	0.21	0.15	0.15	0.11	0.13	0.18	0.19	0.15	0.04	0.09	0.11	0.34	0.1	0.14	0.16	0.14
ENSMMUG00000001752	2.19	2.11	6.58	3.58	3.67	2.74	4.36	4.4	9.47	10.61	16.48	14.27	12.66	11.64	11.59	10.39	12.55	7.5	12.09	13.21	11.08	10.43	12.03	12.29	11.28	7.14	4.71	3.03	1.91	2.51	3.51	2.15	0.19	0.1	0.13	0.18	0.13	0.05	0.1	0.12	16.05	11.98	15.85	15.72	9.02	9.48	9.9	10.09	12.88
ENSMMUG00000001765	0.45	0.5	0.64	0.35	0.16	0.15	0.33	0.34	0.14	0.42	0.34	0.2	0.26	0.23	0.33	0.15	0.23	0.2	0.52	0.36	0.06	0.23	0.4	0.25	0.86	0.55	1.35	0.92	0.79	1.32	1.02	1.19	0.28	0.22	0.33	0.43	0.22	0.24	0.15	0.13	0.37	0.13	0.25	0.21	0.25	0.19	0.33	0.12	0.23
ENSMMUG00000001767	0.64	0.52	0.62	0.73	0.48	0.36	0.22	0.26	0.42	0.57	0.55	0.67	0.54	0.6	0.79	0.76	0.25	0.43	0.33	0.49	0.56	0.32	0.4	0.52	0.43	0.4	0.46	0.53	0.55	0	0.46	0.73	0.8	1.15	0.95	0.9	1.56	1.09	1.26	1.14	0.75	0.3	0.85	1.08	0.9	0.73	0.98	0.64	0.5
ENSMMUG00000001777	0.09	0.12	0.06	0.05	0.12	0.06	0.03	0.08	0.02	0.06	0.16	0.03	0.04	0.09	0.06	0.04	0.01	0.01	0.04	0.03	0.04	0.04	0.06	0.01	0.03	0.02	0.16	0.15	0.13	0.07	0.17	0.05	0.12	0.11	0.12	0.07	0.08	0.05	0.01	0.06	0.05	0.03	0.04	0.03	0.02	0.02	0.11	0.01	0.07
ENSMMUG00000001789	2.51	3.68	2.22	3.59	2.14	3.45	1.77	2.38	0.96	1.67	2.27	2.07	1.49	2.51	1.75	2.37	0.68	0.77	1.88	2.3	1.42	0.9	1.27	0.85	1.37	1.58	2.51	3.98	3.58	3.25	3.87	3.59	0.01	0.03	0.04	0.04	0	0.01	0	0.05	0.4	0.23	0.08	0.33	0.12	0.03	0.07	0.1	1.47
ENSMMUG00000001790	0	0	0	0	0	0	0	0	0	0	0	0	0	0	0	0	0	0	0	0	0	0	0	0	0	0	0	0	0	0	0	0	0.17	0.55	0.16	0.21	0.45	0.68	0.32	0.35	2.1	1.31	2.52	3.03	2.54	3.29	3.28	3.21	0.43
ENSMMUG00000001802	0.49	0.51	0.37	0.24	0.14	0.09	0.06	0.11	0.53	0.71	0.37	0.46	0.2	0.29	0.19	0.35	0.62	0.32	0.22	0.44	0.24	0.12	0.12	0.33	0.66	0.69	0.29	0.36	0.18	0.26	0.3	0.12	1.92	1.35	1.07	1.11	0.73	0.71	0.65	0.74	7.43	9.49	8.69	8.57	3.91	6.31	6.4	8.04	5.6
ENSMMUG00000001803	0.09	0.09	0.17	0.12	0.08	0.13	0.19	0.15	0.2	0.37	0.33	0.34	0.4	0.4	0.19	0.55	0.22	0.04	0.24	0.36	0.48	0.42	0.31	0.4	0.18	0.15	0.1	0.19	0.15	0.18	0.17	0.17	0.5	0.31	0.25	0.24	0.48	0.52	0.24	0.46	0.66	0.27	0.43	0.32	1.04	0.48	0.38	0.67	0.61
ENSMMUG00000001805	0.89	1.3	0.49	0.89	0.44	0.64	0.59	0.35	1.54	1.53	0.46	0.27	0.31	0.34	0.16	0.06	0.92	1.02	0.23	0.18	0.14	0.29	0.16	0.07	1.46	1.01	2.38	1.67	1.33	2.48	1.52	1.99	0.1	0.22	0.11	0.18	0.16	0.11	0.17	0.19	0.35	0.4	0.03	0.08	0.02	0.09	0.12	0.07	0.93
ENSMMUG00000001807	1.35	0.88	0.76	0.62	0.87	1.09	0.68	0.77	0.7	0.78	0.48	0.95	0.69	0.81	0.88	1.14	0.64	0.61	0.87	1.07	0.49	0.81	0.34	0.37	0.8	0.45	0.41	0.62	0.46	1.01	0.59	0.36	2.65	2.04	2.41	3.06	1.62	1.59	3.28	2.69	1.72	2.49	1.95	1.9	2.39	2.08	3.62	1.99	2.54
ENSMMUG00000001808	0.85	1.3	1.39	1.1	0.78	0.67	0.49	0.54	1.48	1.06	1.55	0.89	0.49	0.39	0.54	0.82	1.05	2.2	1.82	0.44	0.48	0.85	0.2	1.16	1.6	1.76	1.62	0.53	0.34	0.2	0.35	0.2	4.45	5.65	7.29	3.49	3.65	3.06	2.46	3.87	1.26	3.08	3.16	1.03	1.13	0.54	0.88	1.3	1.18
ENSMMUG00000001810	0.88	1.29	1.19	1.27	1.83	1.69	1.14	1.66	1.45	0.58	0.4	0.56	0.27	0.42	0.44	0.56	0.63	1.11	0.72	0.75	0.35	0.55	0.21	0.59	0.75	1.16	0.6	0.71	0.34	0.75	1.2	0.69	1.81	1.87	1.01	1.38	1.62	1.09	1.4	2.29	1.33	2.11	1.29	1.12	0.9	1.08	1.17	0.93	1.83
ENSMMUG00000001812	0.02	0.03	0	0	0.03	0.05	0.01	0.01	0.02	0.06	0.01	0.01	0.03	0	0.02	0.01	0.06	0.01	0	0	0.01	0	0.04	0.01	0.01	0.02	0	0.01	0.02	0	0.04	0.02	0.18	0.06	0.09	0.11	0.1	0.07	0.09	0.02	0.02	0.03	0	0	0.04	0.04	0.07	0.04	0
ENSMMUG00000001815	0.07	0.03	0.21	0.12	0.06	0.4	0.19	0	0.04	0.05	0	0.34	0.11	0	0.14	0.2	0.59	0.1	0.16	0.18	0.04	0	0.06	0.68	0.3	0.17	0.22	0.4	0.15	0.18	0	0.66	0.29	0.1	0.39	0.24	0.43	0.03	0.23	0.36	0.11	0.06	0.28	0.13	0.31	0.32	0.04	0.18	0.1
ENSMMUG00000001817	2.82	1.73	1.67	1.67	1.28	1.05	0.92	1.11	2.14	2.77	1.96	1.79	2.24	1.53	1.36	1.58	2.34	1.91	1.28	1.64	1.57	1.29	0.98	1.35	2.16	1.99	1.38	1.25	1.28	1.5	1.18	1.22	0.97	0.99	0.26	1.04	1.34	0.58	0.93	0.97	1.68	0.79	0.44	0.78	1.02	1.04	0.47	0.87	2.39
ENSMMUG00000001819	9.03	2.7	1.79	1.72	1	1.09	0.9	2.04	1.96	3.23	1.59	2.09	1.47	2.34	2.69	5.02	2.24	2.67	1.02	2.37	1.48	2.07	1.54	1.62	3.69	2.02	2.11	2.23	2.34	2.53	1.56	2.24	1.87	2.35	0.67	2.28	1.89	3.19	1.27	1.66	2.11	1.87	1	2.03	2.97	1.79	1.42	1.45	2.76
ENSMMUG00000001820	1.14	0.7	2.76	1.16	1.52	1.37	1.73	1.17	10.6	11.08	12.37	13.27	11.38	11.3	11.11	10.23	8.18	7.95	10.02	12.38	8.85	8.58	8.58	6.75	6.22	5.75	2.48	1.85	1.59	2.07	2.34	2.08	7.98	8.33	9.67	8.38	6.81	8.34	8.48	7.76	50.88	48.57	23.5	24.39	24.3	23.47	19.56	20.08	32.93
ENSMMUG00000001836	0.09	0.04	0.27	0.03	0.08	0.14	0.18	0.03	0.48	0.63	1.94	1.31	2.38	2.36	1.71	2.04	0.47	0.88	0.7	1.23	0.28	1	0.82	0.43	0.34	0.28	0.27	0.14	0.08	0.08	0.15	0.19	1.46	1.31	0.92	1.07	1.71	0.94	0.97	1.37	1.04	0.87	1.28	1.39	2.47	2.31	1.7	2.54	0.85
ENSMMUG00000001837	0.24	0.21	0.15	0.21	0.11	0.06	0.11	0.17	0.19	0.18	0.15	0.2	0.16	0.07	0.11	0.12	0.12	0.22	0.09	0.22	0.09	0.18	0.12	0.12	0.17	0.12	0.15	0.16	0.25	0.15	0.08	0.1	0.26	0.3	0.21	0.24	0.1	0.2	0.1	0.08	0.25	0.25	0.12	0.18	0.2	0.31	0.12	0.25	0.4
ENSMMUG00000001846	0.32	0.57	0.13	0.41	0.27	0.29	0.25	0.29	0.12	0.27	0.09	0.12	0.11	0.1	0.09	0.16	0.28	0.24	0.09	0.14	0.07	0.13	0.19	0.07	0.11	0.07	0.04	0.05	0.25	0.12	0.13	0.11	0.3	0.12	0.28	0.14	0.19	0.14	0.17	0.27	1.15	1.94	1.77	0.83	1.21	1.96	0.98	1.31	1.1
ENSMMUG00000001847	1.27	0.91	1.63	1.52	1.4	1.48	0.89	1.02	2.66	3.52	2.85	2.28	2.44	2.07	2.22	2.3	3.81	2.89	1.98	2.3	1.98	1.77	1.35	1.94	2.16	2.45	0.97	1.43	1.02	1.35	0.77	0.95	28.24	23.35	20.53	16.62	13.85	8.89	8.43	10.56	21.86	18.86	15.12	11.78	11.82	13.55	9.89	11.15	11.98
ENSMMUG00000001849	0.07	0.06	0.05	0.04	0.03	0.06	0.06	0.03	0.03	0.01	0.08	0.01	0.01	0.02	0.01	0.02	0.04	0.06	0.01	0.04	0.02	0.02	0	0.01	0.08	0.12	0.02	0.1	0.15	0.05	0.06	0.08	0.02	0.05	0.04	0.02	0.06	0.05	0	0.06	0.04	0.13	0.03	0.02	0.01	0.01	0	0.01	0.06
ENSMMUG00000001859	0.02	0	0.02	0.01	0.01	0.03	0	0.06	0.03	0.11	0.16	0.19	0.03	0.12	0	0.04	0.27	0.15	0.15	0.24	0.02	0.14	0.23	0.01	0.04	0.02	0.07	0.04	0	0.01	0.03	0	0	0	0.08	0.01	0	0.03	0	0.03	0.39	0.15	0.05	0.33	0.06	0.2	0.18	0.09	0.11
ENSMMUG00000001860	0.01	0	0.01	0	0.01	0	0.02	0.02	0	0.02	0.01	0	0	0.02	0	0.01	0	0	0.09	0	0	0	0.05	0.06	0.02	0.02	0.01	0	0	0.04	0.02	0.06	0.02	0.03	0.01	0.04	0	0	0.05	0.02	0.03	0.01	0.01	0.05	0.01	0.02	0.06	0.01	0.01
ENSMMUG00000001863	0.02	0.02	0.01	0	0	0	0.01	0	0.02	0	0	0	0.01	0	0	0.04	0.03	0	0	0.02	0.01	0.01	0.03	0.03	0	0.01	0.03	0.02	0.03	0	0.04	0.04	0.05	0.02	0.08	0.02	0.06	0.03	0	0	0	0	0	0	0	0	0	0	0.02
ENSMMUG00000001866	0.04	0.07	0.18	0.09	0.06	0.12	0.06	0.2	0.15	0.24	0.48	0.23	0.28	0.33	0.62	0.38	0.11	0.06	0.36	0.49	0.13	0.67	0.22	0.23	0.02	0	0.22	0.33	0	0	0	0.04	6.42	8.57	7.19	10.58	7.98	9.86	10.24	9.6	0.45	0.17	0.29	0.31	0.49	0.54	0.48	0.69	0.15
ENSMMUG00000001876	0.37	0.28	0.51	0.26	0.2	0.14	0.19	0.28	0.21	0.32	0.32	0.41	0.18	0.22	0.29	0.34	0.2	0.16	0.25	0.17	0.11	0.13	0.32	0.21	0.28	0.18	0.49	0.39	0.21	0.46	0.32	0.36	0.25	0.2	0.26	0.3	0.35	0.29	0.22	0.29	0.4	0.3	0.37	0.24	0.35	0.38	0.38	0.43	0.64
ENSMMUG00000001879	0.02	0	0.01	0.02	0.02	0.01	0	0.08	0.03	0.01	0	0	0.01	0.01	0.02	0.06	0.01	0.01	0.01	0.01	0.01	0.04	0	0.12	0.03	0.02	0.04	0.01	0	0.13	0.03	0.17	0.29	0.12	0.11	0.19	0.01	0.24	0.05	0.4	0	0.04	0.03	0.04	0.03	0.13	0	0.21	0.02
ENSMMUG00000001880	0.2	0.27	0.22	0.14	0.16	0.2	0.14	0.33	0.22	0.16	0.12	0.16	0.12	0.09	0.12	0.26	0.13	0.14	0.13	0.18	0.13	0.08	0.12	0.22	0.23	0.31	0.12	0.14	0.13	0.2	0.24	0.24	0.17	0.22	0.13	0.16	0.1	0.13	0.12	0.28	0.15	0.33	0.15	0.21	0.19	0.16	0.21	0.31	0.25
ENSMMUG00000001882	1.37	1.78	1.18	1.75	1.46	1.59	1.38	1.87	0.43	0.47	0.41	0.48	0.24	0.45	0.4	0.58	0.22	0.42	0.3	0.95	0.18	0.12	0.41	0.37	0.72	0.54	0.99	1.1	0.82	1.03	1.35	1.55	0.04	0.07	0.1	0.07	0.06	0.04	0.03	0.06	0.62	0.11	0.4	0.43	0.34	0.39	0.53	0.4	0.54
ENSMMUG00000001883	6.06	5.54	3.69	6.99	5.51	6.1	6.35	6.01	1.92	1.59	1.04	1.71	1.09	1.22	1.86	2.31	1.08	1.58	0.88	2.33	1.24	1.02	0.79	0.95	2.18	2.58	5.81	5.13	3.81	4.72	6.52	5.21	1.1	1.28	0.46	0.79	1.27	0.86	1.17	1	0.38	0.28	0.31	0.7	0.42	0.29	0.57	0.6	1.47
ENSMMUG00000001897	0.02	0.01	0	0	0	0.02	0.01	0	0	0.01	0	0.01	0.02	0.01	0	0	0	0	0	0.01	0	0.01	0	0.01	0.02	0	0	0	0	0	0	0.03	0	0.01	0.06	0.05	0.02	0.01	0.03	0.01	0.03	0.01	0	0.04	0.01	0.01	0	0	0
ENSMMUG00000001903	0.02	0.02	0.04	0	0.04	0.06	0	0	0.05	0.03	0	0	0	0	0.03	0.03	0	0	0.04	0.13	0	0.02	0	0	0.03	0	0	0	0	0	0	0	0.04	0.08	0.26	0.04	0	0	0.2	0.29	0.02	0.04	0	0	0	0.16	0	0	0.06
ENSMMUG00000001904	0.22	0.39	0.03	0.13	0.02	0	0.03	0.01	0.01	0.02	0.01	0.04	0.02	0.07	0.02	0.06	0.03	0.08	0.01	0.11	0	0.06	0	0.02	0.04	0.03	0.08	0.06	0.02	0.02	0	0.04	13.74	17.13	8.56	11.86	8.41	11.62	10.66	9.11	0.13	0.05	0.27	0.22	0.04	0.19	0.09	0.13	0.01
ENSMMUG00000001909	0.73	0.66	1.37	0.58	0.46	0.4	0.41	0.43	8.81	11.37	9.29	8.73	7.17	6.88	6.28	7.63	7.26	7.9	5.93	8.16	4.95	4.61	4.91	3.78	4.64	4.24	1.27	0.49	0.51	1.15	1.03	0.58	1.18	1.07	0.77	1.05	0.84	1.4	0.96	1.08	21	18.54	14.32	11.45	13.59	16.25	11.42	13.75	13.03
ENSMMUG00000001910	0.02	0.01	0.05	0.03	0.06	0.05	0.07	0.06	0.09	0.04	0.11	0.16	0.12	0.21	0.21	0.23	0.05	0.01	0.15	0.15	0.27	0.15	0.06	0.19	0.03	0.07	0.05	0.08	0.01	0.01	0.01	0.02	0.04	0.07	0.1	0.09	0.13	0.14	0.14	0.3	0.17	0.08	0.12	0.14	0.21	0.43	0.18	0.13	0.07
ENSMMUG00000001915	0.2	0.17	0.18	0.15	0.14	0.19	0.13	0.18	0.05	0.04	0.05	0	0.03	0	0.04	0.12	0.11	0.18	0.05	0.02	0.03	0.03	0.01	0.04	0.08	0.13	0.26	0.15	0.04	0.11	0.09	0.16	0.28	0.03	0.04	0.07	0.06	0.22	0.07	0.26	0.27	0.69	0.96	0.4	0.5	0.47	0.71	0.24	0.2
ENSMMUG00000001923	1.23	1.33	0.95	1.35	0.96	0.72	2.23	1.19	2.58	3.46	3.92	3.44	3.73	3.78	3.8	5.02	2.66	3.37	2.45	3.81	4.78	3.22	3.26	2.87	1.25	1.62	1.62	1.57	1.23	1.52	1.95	1.52	1.96	2.16	1.24	2.36	1.56	1.29	1.44	2.67	2.74	2.39	2.06	1.89	3.84	2.05	3.16	2.86	3.14
ENSMMUG00000001929	0	0.03	0.01	0.01	0	0	0.03	0	0.02	0	0.02	0.02	0.01	0.02	0	0.01	0.01	0	0	0	0.08	0	0.02	0.02	0	0.07	0	0	0.01	0	0.02	0.11	0.05	0.07	0.07	0.1	0.08	0.11	0.19	0.07	0.03	0	0.07	0.05	0	0	0	0.04	0
ENSMMUG00000001934	0.28	0.25	0.58	0.68	0.78	0.63	0.53	0.56	0.46	0	0	0.16	0.29	0	0.13	0.55	0.27	0.61	0.18	0.25	0	0	0.77	0.39	0.35	0	0.9	0	0.28	0.17	0.19	0	2.52	2.29	2.42	1.76	2.5	2.02	2.5	1.26	0.3	0.05	0.19	0.63	1.53	0.05	0.15	0.72	0.05
ENSMMUG00000001936	4.98	6.42	7.92	4.34	2.6	2.51	8.66	7.75	1.58	0.55	3.34	2.73	2.35	5.29	3.16	2.65	1.95	2.3	5.38	2.98	5.12	6.49	8.89	6.85	16.51	17.51	22.43	22.23	15.16	31.51	14.94	22.29	4.14	3.17	4	4.88	4.97	5.81	5.04	7.46	4.07	4.83	9.9	15.32	7.2	8.92	13.07	11.04	1.84
ENSMMUG00000001946	2.29	2.3	1.75	1.69	2.04	2.36	1.54	2.61	2.4	2	1.44	1.68	1.33	1.67	1.92	1.99	0.95	0.95	1.12	1.36	0.78	0.82	0.68	0.76	0.99	1.68	1.73	1.5	1.65	1.79	2.55	1.84	0.65	0.71	0.43	0.31	0.4	0.28	0.3	0.23	2.04	3.54	2.68	3.41	1.23	1.46	2.42	2.24	4.25
ENSMMUG00000001948	0.33	0.21	0.04	0.14	0.05	0.19	0.33	0.16	0.06	0.03	0.04	0.02	0	0.09	0.12	0.07	0.01	0.01	0.07	0.06	0.02	0.04	0.04	0.05	0.13	0.07	0.16	0.13	0.15	0	0.16	0.15	2.02	1.65	1.74	1.79	1.52	1.24	1.93	1.38	0.02	0.18	0.02	0.06	0.07	0.1	0.13	0.07	0.05
ENSMMUG00000001976	0.29	0.19	0.12	0.19	0.23	0.23	0.2	0.24	0.4	0.15	0.17	0.14	0.14	0.11	0.1	0.16	0.14	0.1	0.16	0.09	0.09	0.1	0.11	0.17	0.29	0.2	0.24	0.13	0.1	0.22	0.2	0.21	0.37	0.39	0.21	0.26	0.22	0.15	0.05	0.21	0.2	0.23	0.26	0.35	0.18	0.27	0.32	0.28	0.18
ENSMMUG00000001978	0	0	0	0	0.01	0	0.01	0	0	0	0	0	0.01	0.01	0.01	0.01	0	0	0	0	0	0	0.03	0	0	0	0	0.01	0	0.01	0	0	0.01	0.01	0.01	0	0.03	0.01	0.01	0.01	0	0.04	0	0	0.03	0	0	0	0
ENSMMUG00000001979	5.52	4.56	4.18	3.47	2.1	2.41	2.24	3.43	1.02	0.16	0.55	0.78	0.26	0.85	0.45	0.39	0.66	0.21	0.65	0.37	0.7	0.57	0.21	0.5	2.67	2.69	2.95	3.22	1.72	2.05	1.56	1.81	16.1	20.48	28.51	17.58	18.61	13.03	16.18	19.21	1.23	1.22	4.85	7.67	1.54	2.91	5.21	2.86	0.92
ENSMMUG00000001981	0.07	0.11	0.04	0.08	0.08	0.03	0.01	0.1	0.04	0.09	0.17	0.05	0.13	0.11	0.05	0.09	0.07	0.09	0.01	0.05	0.01	0.11	0.11	0.03	0.07	0.05	0.09	0.16	0.13	0.1	0.08	0.12	1.12	0.8	0.88	0.78	0.64	0.61	0.34	0.43	1.45	1.75	1.32	1.2	1.51	0.96	1.4	1.08	1.03
ENSMMUG00000001985	0	0.01	0	0.03	0.02	0.01	0.02	0.01	0	0	0	0	0.02	0	0	0	0	0	0.07	0.01	0.01	0.01	0	0	0	0	0	0.02	0	0.4	0.03	0.02	2.47	1.57	2.76	2.4	3.55	4.05	3.18	3.47	0	0.05	0.1	0.08	0.04	0.03	0	0	0
ENSMMUG00000001991	0.23	0.6	0.25	0.28	0.24	0.54	0.55	0.38	0.48	0.4	0.73	0.61	0.33	0.9	0.64	0.83	0.52	0.25	0.49	0.63	0.38	0.58	1.12	1.32	0.44	0.37	0.25	0.35	0.31	0.28	0.49	0.63	1.21	1.47	1.62	2.25	1.92	3.36	3.63	3.62	0.49	0.94	0.93	1.59	0.41	1.46	1.5	1.7	0.66
ENSMMUG00000001995	0.03	0.01	0	0	0	0	0.01	0.02	0.02	0.01	0.01	0.02	0	0.01	0.01	0.01	0	0	0	0.02	0.01	0.01	0.01	0	0	0.02	0.02	0	0.02	0.04	0	0.02	0.02	0.05	0.07	0.08	0.03	0	0.02	0	0.01	0.02	0.02	0	0.02	0	0	0.02	0.02
ENSMMUG00000001997	0	0	0	0	0	0.03	0	0	0.04	0	0	0	0	0	0	0	0	0	0.03	0	0.02	0	0.02	0.02	0.02	0	0	0	0.1	0.12	0	0	0.6	0.18	0.13	0.19	0	0.03	0	0.03	0	0	0	0	0	0	0	0	0
ENSMMUG00000002006	0.03	0.02	0.01	0.03	0.03	0.05	0.02	0.04	0.02	0.02	0.02	0.03	0.03	0.02	0.02	0.02	0.01	0.02	0.01	0.01	0.02	0.02	0.02	0.04	0.04	0.01	0.03	0.01	0.02	0.02	0.06	0.01	0.03	0.14	0.07	0.11	0.05	0.1	0.14	0.04	0.03	0.02	0.06	0.01	0.01	0.01	0.03	0	0.03
ENSMMUG00000002011	0.52	0.17	0.81	0.49	0.24	0.18	0.26	0.25	0.08	0.16	0.3	0.29	0.21	0.16	0.27	0.14	0.19	0.04	0.31	0.24	0.14	0.12	0.18	0.21	0.38	0.16	1.19	0.61	0.63	0.33	0.42	0.84	1.6	0.2	1.74	1.07	0.82	0.54	0.94	0.94	0.55	0.19	1.07	0.84	0.72	0.61	0.91	0.69	0.32
ENSMMUG00000002014	0.02	0.06	0.05	0	0.03	0.01	0.01	0.03	0.12	0.05	0.03	0.04	0.07	0.06	0.05	0.1	0.06	0.01	0.07	0.06	0.02	0.02	0	0.04	0.06	0.11	0.06	0.07	0.03	0.04	0.01	0	0.01	0.04	0.04	0.06	0.01	0.03	0.03	0.02	0.11	0.04	0.03	0.06	0.03	0.08	0.01	0.1	0.1
ENSMMUG00000002020	0.03	0.02	0.03	0.05	0.03	0.03	0.02	0	0.07	0.01	0.04	0.08	0.23	0.13	0.08	0.14	0.02	0.07	0.26	0.22	0.23	0.13	0.29	0.15	0.06	0.01	0.19	0.08	0.07	0.11	0.08	0.09	0.22	0.1	0.21	0.07	0.17	0.1	0.1	0.06	0.02	0.04	0.27	0.22	0.14	0.17	0.19	0.23	0.01
ENSMMUG00000002029	2.3	0.8	2.24	1.49	0.89	0.81	0.91	0.88	0.4	1.71	1.91	1.2	1.6	1.37	1.03	0.65	2.14	1.03	1.9	1.71	2.18	1.86	1.37	1.11	2.54	1.35	2.27	1.24	1.71	2.1	1.21	0.67	6.3	2.39	3.65	3.42	4.74	2.98	2.64	1.74	1.97	1.07	1.66	1.2	1.57	1.03	1.34	0.81	1.56
ENSMMUG00000002031	0	0	0	0	0	0	0	0	0	0	0	0	0	0	0	0	0	0	0	0	0	0	0	0	0	0	0	0	0	0	0	0	3.29	3.66	2.6	3.08	2.94	2.99	2.66	3.17	0.42	0.21	0.05	0.14	0.4	0.1	0.1	0.21	0.43
ENSMMUG00000002037	0.26	0.21	0.33	0.27	0.18	0.21	0.17	0.2	0.25	0.4	0.34	0.23	0.17	0.3	0.09	0.18	0.4	0.24	0.3	0.26	0.23	0.26	0.13	0.15	0.2	0.2	0.36	0.23	0.25	1.86	0.24	0.19	0.28	0.16	0.28	0.29	0.28	0.32	0.18	0.23	0.12	0.19	0.24	0.21	0.2	0.24	0.17	0.27	0.46
ENSMMUG00000002038	0.42	0.36	0.66	0.52	0.69	0.92	0.67	0.59	1.94	2.32	2.23	2.01	2.57	2.13	2.01	2.14	1.21	1.3	1.4	2.11	0.83	0.97	0.59	0.62	0.87	0.76	0.46	0.31	0.3	0.43	0.55	0.44	22.69	31.44	20.26	26.94	21.85	22.18	18.89	18.7	18.84	22.86	18.55	14.16	18.78	17.1	12.72	17.14	14.06
ENSMMUG00000002041	0.18	0.25	0.46	0.16	0.13	0.1	0.19	0.17	1.77	1.11	1.33	1.7	1.05	1.37	1.01	1.31	0.71	1.27	0.89	1.04	0.79	0.83	0.43	0.7	0.35	0.83	0.31	0.17	0.12	0.38	0.26	0.19	0.26	0.35	0.24	0.35	0.24	0.2	0.22	0.27	1.49	2.33	2.04	1.55	1.22	2.3	2.04	1.53	2.04
ENSMMUG00000002049	0.06	0.1	0.06	0.14	0.09	0.09	0.29	0.05	0.14	0.05	0.07	0.13	0.08	0	0.03	0.06	0.14	0.12	0.1	0.19	0	0	0	0.19	0.08	0.05	0	0.13	0.15	0	0.1	0.12	0.04	0.12	0.06	0.1	0	0.08	0.08	0	0	0.04	0.01	0.1	0.05	0	0	0	0.02
ENSMMUG00000002052	0.76	0.99	1.4	0.78	0.59	0.53	1.18	1.16	0.35	0.51	1.52	1.39	1.36	2.21	1.7	1.4	0.59	0.49	1.28	1.28	1.83	2.21	2.7	2.09	1.86	1.58	3.56	2.76	2.84	3.62	2.56	2.49	3.75	3.02	3.85	3.69	6.68	7.52	10.53	8.6	3.41	2.25	6.1	7.68	6.51	10.81	9.53	8.69	1.9
ENSMMUG00000002075	0.07	0	0.01	0.04	0.03	0	0.04	0.01	0	0	0	0	0.02	0.06	0	0	0.03	0.01	0	0	0	0	0.13	0	0	0.02	0.02	0.02	0	0	0.03	0.05	0.01	0.05	0.05	0	0.02	0.06	0.04	0.05	0.02	0.01	0	0.01	0.01	0.07	0	0.01	0.01
ENSMMUG00000002081	0.82	1.02	1.14	0.7	0.67	0.53	0.54	0.81	0.58	0.59	0.62	0.55	0.74	1.16	0.79	0.62	0.88	0.76	0.61	0.4	0.66	0.89	1.54	0.65	0.64	1.21	1.14	0.71	0.82	0.84	1	1.13	1.15	1.76	2.25	2.66	2.46	2.35	2.47	2.31	0.97	0.87	1.4	1.16	1.88	2.91	1.72	1.44	1.25
ENSMMUG00000002083	0.11	0.01	0.1	0.06	0.02	0.01	0.05	0.01	0	0	0.02	0	0.08	0.03	0	0	0	0.02	0	0.09	0	0.01	0.09	0.01	0.05	0.02	0	0.04	0.09	0.11	0.12	0.02	1.46	2.33	5.74	1.28	0.75	0.8	1.08	1.14	0.41	0.69	1	0.48	0.86	1.17	0.7	0.86	1.17
ENSMMUG00000002087	0.53	0.35	0.53	0.76	0.89	0.45	0.91	0.24	0.16	0.09	0.12	0.19	0.17	0.35	0.22	0.33	0.04	0.16	0.26	0.13	0.28	0.27	0.51	0.25	0.57	0.46	0.52	1.01	0.7	1.11	0.56	0.37	4.58	4.02	5.86	6.36	8.02	7.37	7.72	6.64	0.55	0.31	0.5	0.93	0.76	0.55	0.72	0.69	0.29
ENSMMUG00000002090	0.13	0.03	0.03	0.09	0.09	0.1	0.15	0.14	0.04	0	0	0.04	0.04	0.09	0.05	0.04	0.02	0	0.02	0.12	0.03	0.05	0.11	0.13	0.04	0.03	0.16	0.17	0.15	0.09	0.12	0.11	0.45	0.29	0.63	0.22	0.39	0.34	0.27	0.33	0.13	0.08	0.22	0.06	0.1	0.04	0.06	0.1	0.08
ENSMMUG00000002092	0.09	0.08	0.15	0.15	0.1	0.09	0.06	0.09	0.35	0.16	0.23	0.18	0.28	0.21	0.23	0.34	0.09	0.17	0.24	0.32	0.22	0.3	0.28	0.5	0.12	0.12	0.05	0.07	0.07	0.04	0.14	0.12	0.94	1.46	1.45	1.41	1.65	1.96	1.18	1.45	0.33	0.34	0.45	0.32	0.52	0.5	0.59	0.49	0.21
ENSMMUG00000002099	1.67	1.49	1.23	0.88	1.53	0.4	1.83	1.37	0.68	1.46	1.2	0.46	0.64	0.29	1.5	0.4	0.8	1.3	1.06	0.61	3.1	2.26	1.78	2.47	1.03	1.58	4.42	5.09	3.87	5.38	1.64	0.8	1.58	1.73	2.39	0.96	1.78	1.38	1.95	1.28	1.49	1.76	3.72	3.21	1.11	2.46	2.29	2.05	0.85
ENSMMUG00000002101	0.14	0.12	0.23	0.14	0.16	0.13	0.26	0.14	0.1	0.1	0.14	0.19	0.18	0.04	0.13	0.23	0.02	0.04	0.19	0.17	0	0.14	0.14	0.1	0.07	0.07	0.12	0.23	0.2	0.38	0	0.11	19.19	17.34	14.5	17.28	20.19	13.93	12.05	15.37	10.96	8.7	9.38	9.14	10.33	8.58	6.48	8.91	7.49
ENSMMUG00000002107	0.02	0.01	0	0	0.01	0.02	0	0	0.03	0.04	0.02	0.01	0.02	0	0	0.02	0	0	0	0.01	0.01	0.01	0	0.01	0.01	0.04	0.01	0.02	0.01	0.04	0.03	0	0.07	0	0.01	0.01	0.01	0.01	0.03	0.02	0	0.03	0	0	0.01	0	0.01	0	0.05
ENSMMUG00000002108	0.11	0.08	0.16	0.16	0.08	0.13	0.19	0.08	0.28	0.53	0.1	0.59	0.83	0.31	0.33	0.37	0.21	0.45	0.12	0.76	0.46	0.03	0.58	0.26	0.12	0.15	0.61	0.42	0.55	0.23	0.56	0.29	1.68	0.95	1.02	0.7	0.17	0.3	0.21	0.72	0.59	0.24	0.09	0.44	0.44	0.07	0.22	0.16	0.2
ENSMMUG00000002111	0	0	0	0	0.13	0	0.03	0.03	0	0	0	0	0.17	0.06	0	0	0	0	0	0	0.09	0	0	0.03	0	0	0	0	0.04	0	0	0	0.05	0.13	0.34	0.04	0.02	0.08	0.09	0.13	0.23	0.21	0	0.12	0.25	0.23	0.26	0.1	0.37
ENSMMUG00000002121	2.01	1.72	1.45	2.03	2.12	2	2.12	1.64	1.78	2.37	1.58	2.04	1.42	1.49	1.49	1.25	3.91	2.76	1.31	1.7	1.26	2.01	1.51	1.37	2.37	2.32	2.06	2.54	2.63	2.14	2.01	1.92	3.58	3.72	4.79	4.49	3.5	3.53	4.54	2.96	2.88	2.88	3.02	2.94	2.93	3.65	3.52	2.71	3.15
ENSMMUG00000002128	0.02	0	0	0.02	0.03	0.04	0.03	0.02	0.01	0.05	0.02	0.02	0.09	0.1	0.04	0.16	0.08	0.01	0.17	0.04	0.16	0.35	0.55	0.32	0	0.04	0.3	0.16	0.09	0.06	0.06	0.03	0.03	0.01	0.06	0.11	0.06	0.15	0.2	0.03	0.03	0.05	0.23	0.07	0.21	0.25	0.24	0.46	0.01
ENSMMUG00000002137	0.12	0.17	0.03	0.2	0.4	0.3	0.35	0.18	0.08	0.04	0.11	0.05	0.33	0	0	0.14	0.15	0.14	0.12	0.03	0.33	0.16	0.03	0.16	0.11	0.12	0.2	0.15	0.09	0.05	0.24	0.12	0.42	0.39	0.3	0.38	0.1	0.36	0.83	0.37	0.29	0.23	0.12	0.29	0.06	0.13	0.25	0.07	0.08
ENSMMUG00000002140	0.02	0.03	0.04	0.02	0.02	0.05	0.02	0.02	0.05	0.04	0.05	0.02	0.07	0.03	0.02	0.08	0.02	0.04	0.04	0.04	0.07	0.05	0.02	0.04	0.02	0.03	0.04	0.06	0.06	0.04	0.08	0.04	0.15	0.16	0.14	0.14	0.11	0.07	0.12	0.06	0.1	0.12	0.04	0.12	0.15	0.11	0.09	0.16	0.12
ENSMMUG00000002144	0.01	0	0	0.01	0.01	0	0.01	0.01	0.01	0.01	0	0	0.01	0.01	0.01	0.01	0.02	0.01	0.02	0	0.02	0.01	0	0	0.01	0.02	0.02	0.01	0.01	0.02	0	0	0	0.01	0.03	0.01	0.02	0.02	0.02	0.01	0.01	0	0.02	0	0.02	0.01	0.03	0	0
ENSMMUG00000002155	0.85	0.53	0.69	0.76	0.25	0.35	0.38	0.77	0.1	0.3	0.53	0.28	0.08	0.19	0.5	0.54	0.25	0.06	0.31	0.37	0.06	0.22	0.12	0.39	0.37	0.4	0.92	0.61	0.44	0.4	0.69	1.09	0.43	0.49	0.57	0.61	0.38	0.41	0.43	0.67	0.13	0.15	0.31	0.33	0.19	0.21	0.36	0.38	0.31
ENSMMUG00000002156	0.01	0.02	0.01	0	0.01	0.05	0.01	0.01	0.08	0.06	0.04	0.04	0.11	0.12	0.02	0.2	0.04	0.05	0.13	0.09	0.15	0.06	0.02	0.03	0.01	0.02	0.05	0.05	0	0	0.01	0.04	0.03	0.02	0.03	0.04	0.01	0.08	0.02	0	0.08	0.08	0.06	0.04	0.06	0.11	0.03	0.12	0.04
ENSMMUG00000002159	0.02	0.02	0	0.01	0.08	0.02	0	0	0.03	0.02	0	0	0	0	0.07	0.02	0.08	0.06	0	0	0.04	0.02	0	0.03	0.06	0.03	0	0	0	0.08	0	0.05	0	0.01	0	0	0	0	0	0	0.02	0.01	0	0	0	0	0	0	0.02
ENSMMUG00000002162	0.04	0.05	0.1	0.02	0	0.04	0	0.04	0.02	0.05	0.07	0.03	0	0.04	0.05	0.06	0.04	0.04	0.06	0.03	0.06	0.06	0.02	0.08	0.05	0.05	0.03	0.1	0.06	0.28	0.08	0.04	0.44	0.17	0.18	0.37	0.44	0.11	0.18	0.31	0	0.09	0.07	0.12	0.04	0	0.16	0.15	0.3
ENSMMUG00000002163	0.06	0.03	0.05	0.04	0.04	0.02	0.05	0.03	0.04	0.02	0.01	0.05	0.1	0.04	0.09	0.08	0.05	0.02	0.02	0	0.06	0.01	0.05	0	0.11	0.11	0.16	0.13	0.23	0.5	0.11	0.22	0	0.02	0.01	0.02	0.02	0.02	0	0	0.04	0.02	0.01	0.03	0.08	0.05	0.05	0.01	0.02
ENSMMUG00000002175	0.02	0	0.01	0	0.01	0	0	0	0	0.01	0	0	0	0	0.01	0.02	0	0	0	0	0	0.01	0	0	0	0.04	0.02	0	0	0	0.03	0	0.04	0	0	0.05	0	0.02	0.01	0.01	0.04	0.04	0.01	0	0.01	0	0.04	0.01	0
ENSMMUG00000002187	4.72	4.85	4.76	4.03	3.41	3.59	3.22	3.38	3.88	3.24	4.6	3.91	4.06	4.91	4.76	5.02	3.02	4.96	4.69	4.91	3.08	2.96	4.14	3.11	3.41	3.79	5.06	4.43	3.28	3.89	4.42	3.41	3.85	5.57	5.24	5.87	2.84	2.47	4.08	3.84	3.17	4.16	4.32	3.66	4.47	4.15	5.28	3.67	4.43
ENSMMUG00000002188	0	0	0	0	0	0.02	0	0.01	0	0	0	0.01	0	0.01	0.01	0	0	0	0	0	0	0	0	0	0.01	0	0	0	0	0	0	0	0.63	0.35	0.45	0.37	0.44	0.29	0.51	0.38	0.55	0.6	1.21	1.05	1.03	1.66	1.63	1.68	0.43
ENSMMUG00000002190	0.05	0	0	0	0.02	0	0.11	0	0	0.06	0.08	0.04	0.08	0	0	0	0	0.09	0	0.02	0	0	0	0	0	0.18	0	0	0	0.04	0.05	0	0.08	0.08	0.12	0	0.04	0.07	0.08	0.07	0.16	0	0.14	0.06	0	0	0.06	0	0.06
ENSMMUG00000002192	0.54	0.68	0.98	0.39	0.09	0.14	0.77	0.32	0.66	0.64	0.45	0.43	0.33	0.24	0.51	0.59	0.48	1.15	0.55	0.55	0.28	0.17	0.07	0.41	0.62	1.15	1.66	0.64	0.24	0.6	0.86	0.6	0.6	0.77	0.94	0.51	0.73	0.55	0.44	0.65	0.73	1.02	0.91	0.65	0.7	0.34	0.73	0.48	0.75
ENSMMUG00000002195	0.04	0.08	0.1	0.05	0.04	0.04	0.04	0.04	0.37	0.73	0.53	0.33	0.47	0.32	0.26	0.33	0.15	0.28	0.25	0.37	0.35	0.6	0.2	0.28	0.12	0.18	0.11	0.02	0.03	0.02	0.01	0.02	1.14	1.17	0.85	1.27	1.16	0.9	1.02	1.51	12.35	16.23	7.11	7.07	8.38	7.7	4.61	7.29	5.27
ENSMMUG00000002198	0.38	0.46	0.67	0.24	0.27	0.31	0.56	0.51	0.66	0.92	0.19	0.81	0.75	0.34	0.51	0.75	0.7	0.23	0.13	0.24	0.17	0.36	0.4	0.57	0.43	0.55	0.6	0	0.95	0.14	0.43	0.36	35.1	42.26	33.24	35.72	27.01	24.52	28.76	27.99	12.43	14.69	12.48	10.64	15.06	15.73	13.47	13.7	15.91
ENSMMUG00000002199	0.08	0.18	0.14	0.21	0.15	0.18	0.2	0.14	0.12	0.18	0.09	0.19	0.3	0.24	0.12	0.34	0.17	0.05	0.06	0.21	0.11	0.3	0.1	0.31	0.09	0.22	0.22	0.14	0.28	0.39	0.04	0.07	1.34	1.7	1.54	1.86	1.4	1.97	1.94	2.13	1.11	1.27	1.91	1.92	2.12	2.15	2.59	1.66	0.77
ENSMMUG00000002201	0.04	0.03	0.04	0.03	0.02	0.03	0.06	0.02	0.02	0.05	0.04	0.02	0.01	0.01	0.01	0.01	0.03	0.01	0.01	0.01	0.02	0.01	0.02	0.01	0	0.01	0.01	0.02	0.01	0.01	0.01	0	0.57	0.34	0.59	0.55	0.42	0.47	0.52	0.53	0.01	0.01	0.01	0.01	0	0.03	0.02	0.02	0.05
ENSMMUG00000002202	0.01	0	0.02	0.01	0	0.03	0.01	0.01	0.04	0.02	0.01	0.01	0.03	0	0.03	0.02	0.01	0.01	0	0	0.01	0.01	0	0.02	0.01	0	0.02	0	0.02	0	0.01	0.04	0.01	0	0.04	0.03	0.01	0.02	0	0.03	0.02	0.02	0.02	0.02	0.01	0.03	0.03	0	0.03
ENSMMUG00000002203	0.75	0.3	0.68	0.27	0.3	0.54	0.39	0.44	0.73	0.76	0.86	0.55	0.55	0.58	0.92	0.78	0.74	0.47	0.74	0.56	0.49	0.56	0.84	0.52	0.82	0.53	0.84	0.81	0.67	0.57	0.57	0.91	1.17	0.63	1.06	0.87	0.95	1.17	0.94	0.83	1.84	1.14	1.28	1.12	0.89	0.88	1.44	1.01	3.07
ENSMMUG00000002207	2.6	2.3	3.55	2.79	2.57	3.43	2.16	3.46	2.6	1.97	1.79	1.91	2.23	2.32	2.39	2.86	0.84	0.87	2.02	2.2	1.8	1.26	1.41	1.65	1.49	1.8	2.42	1.91	1.37	2.42	1.66	2.6	1.3	1.21	2.08	1.51	1.97	1.36	1.66	1.92	0.96	1.55	2.27	1.75	1.73	1.47	1.96	2.31	1.54
ENSMMUG00000002208	0.13	0.15	0.07	0.2	0.06	0.04	0.13	0.03	0.05	0.13	0.06	0.09	0.14	0.09	0.11	0.07	0.06	0.23	0.05	0.05	0.11	0.22	0.08	0.06	0.14	0.13	0.19	0.26	0.24	0.36	0.08	0.18	0.48	0.46	0.55	0.54	0.88	0.39	0.29	0.34	0.21	0.25	0.27	0.35	0.2	0.2	0.2	0.13	0.1
ENSMMUG00000002210	0.06	0	0.08	0.1	0.02	0	0.1	0.02	0.08	0.03	0.04	0.07	0.07	0.13	0.09	0.12	0.08	0	0.04	0	0	0.09	0.1	0.02	0	0.3	0.07	0	0	0	0	0	0.15	0.3	0.13	0.14	0.07	0.16	0.13	0.06	0.36	0.48	0.25	0.33	0.11	0.11	0	0.25	0.19
ENSMMUG00000002217	2.74	2.8	2.28	2.11	1.72	1.65	1.53	1.75	5.15	5.58	6.51	5.37	6.45	5.54	5.21	4.34	6.24	4.44	4.41	4.71	4.79	4.88	4.21	2.79	3.56	3.25	1.85	2.21	2.09	1.68	1.54	2.39	1.46	1.75	0.76	0.81	1.14	1.09	0.89	1.57	5.73	4.28	3.65	4.34	3.73	4.63	2.91	3.86	6.58
ENSMMUG00000002219	0.68	0.73	0.38	0.39	0.15	0.29	0.23	0.53	0.66	1.03	0.33	0.18	0.46	0.17	0.62	0.28	0.16	0.48	0.8	0.24	0.52	0	0.07	0	0.2	0.82	0.6	0.72	0.12	0.52	0.59	0.36	1.97	2.03	2.02	1.62	1.78	1.32	1.23	0.65	0.33	0.4	0.54	0.21	0.63	0.42	0.41	0	0.42
ENSMMUG00000002220	0	0	0	0	0	0	0	0	0	0	0	0	0	0	0	0	0	0	0	0	0	0	0	0	0	0	0	0	0	0	0	0	0.4	0.21	0.22	0.16	0.31	0.29	0.49	0.09	0.01	0.06	0.07	0.07	0.04	0.05	0.02	0.01	0.01
ENSMMUG00000002234	0.2	0.08	0.1	0.17	0.21	0.18	0.26	0.07	1.36	1.73	1.02	1.27	1.46	1.38	1.05	1.13	0.87	0.73	0.67	0.88	0.87	0.88	1.71	0.95	0.78	0.76	0.56	0.16	0.01	0.5	0.49	0.05	0.65	0.57	0.7	0.76	2.58	3.28	1.7	2.28	17.94	29.52	19.72	21.65	20.95	25.31	15.61	20.7	6.15
ENSMMUG00000002236	0.04	0.11	0.13	0.16	0.12	0.12	0.08	0.09	0.14	0.18	0.11	0.08	0.28	0.11	0.14	0.18	0.03	0.07	0.14	0.08	0.08	0.06	0.17	0.14	0.01	0.04	0.29	0.16	0.17	0.08	0.06	0.09	0.51	0.59	0.36	0.33	0.23	0.3	0.31	0.22	0.03	0.07	0.08	0.1	0.15	0.35	0.05	0.16	0.15
ENSMMUG00000002238	0.1	0.01	0.14	0.1	0.06	0.05	0.08	0.1	0.2	0.15	0.06	0.11	0.23	0.2	0.07	0.31	0.09	0.27	0.05	0.1	0.09	0.08	0.12	0.03	0.18	0.08	0.05	0.11	0.07	0.2	0.19	0.03	0.11	0.06	0	0.15	0.03	0.02	0.05	0.05	0.17	0.24	0.11	0.1	0.08	0.17	0.04	0.17	0.53
ENSMMUG00000002239	0.02	0	0.06	0	0.06	0	0	0.04	0.05	0	0	0	0	0	0.17	0	0	0	0	0	0	0.04	0	0	0	0	0.07	0	0	0	0.04	0	0.4	0.42	0.37	0.42	0.5	0.6	0.57	0.39	0.26	0.11	0.3	0.55	0.52	0.33	0.47	0.1	0.17
ENSMMUG00000002243	0.02	0	0.03	0	0	0.02	0.01	0.01	0.45	0.14	0.32	0.06	0.16	0.02	0.17	0.01	0.02	0.2	0.19	0.14	0	0.02	0	0.13	0.02	0.04	0	0	0.09	0.04	0	0.08	0.11	0.09	0.05	0.11	0.01	0.05	0.05	0.06	0.03	0.06	0	0.03	0	0	0.03	0.04	0.07
ENSMMUG00000002253	0.09	0.04	0.01	0	0.1	0.05	0.02	0.05	0.03	0.07	0.01	0.07	0.11	0	0.02	0.02	0.03	0	0.01	0.01	0.04	0	0	0.01	0.02	0.06	0.02	0.03	0.13	0.05	0.03	0.12	0.08	0.07	0.02	0.02	0.28	0	0.02	0.02	0.01	0.04	0.04	0.05	0.02	0.01	0.02	0.05	0
ENSMMUG00000002254	0.02	0	0.47	0.1	0.19	0.09	0.37	0	0	0.19	0.03	0	0.11	0	0.03	0.05	0	0.03	0.05	0	0.2	0.13	0.34	0	0	0.44	0.44	0.22	0.32	0.1	0.36	0.28	0.06	0.16	0.11	0.18	0.34	0.11	0.23	0.01	0	0.09	0	0	0	0.23	0.07	0	0
ENSMMUG00000002255	0.03	0.02	0.02	0	0.01	0.02	0.03	0.03	0.03	0.05	0.02	0.02	0.03	0.02	0.01	0.01	0.01	0	0.06	0	0.01	0.06	0	0	0.04	0.03	0.06	0.03	0.02	0.02	0.04	0.02	0.12	0.1	0.07	0.09	0.04	0.16	0.1	0.07	0.03	0.02	0	0.01	0.01	0.07	0	0.01	0.05
ENSMMUG00000002258	1.07	1.7	0.62	3.44	1.88	1.42	1.42	0.95	0.84	0.75	0.23	0.51	0.26	0.44	0.22	0.29	0.67	0.6	0.2	0.29	0.22	0.12	0.05	0.14	0.6	0.53	0.81	1.55	0.98	0.69	0.79	0.7	0.16	0.39	0.21	0.26	0.37	0.37	0.26	0.23	0.24	0.37	0.27	0.41	0.17	0.3	0.36	0.26	0.92
ENSMMUG00000002260	1.04	0.83	1.71	1.32	0.59	0.75	0.95	0.83	1.01	1.57	1.65	1.64	1.06	1.27	1.42	1.22	1.48	1.14	1.85	1.79	1.22	1.55	1.23	1.16	1.43	1.22	1.54	1.39	1.12	1.66	1.53	1.39	1.57	1.53	1.41	1.86	1.76	1.24	1.51	1.8	1.91	1.6	2.81	1.94	1.97	2.39	2.31	1.62	2.17
ENSMMUG00000002264	0.09	0.04	0.06	0.01	0.03	0.01	0.03	0.22	0.11	0.08	0.09	0.1	0.15	0.1	0.09	0.08	0.14	0.09	0.09	0.09	0.13	0.04	0.01	0.02	0.03	0.03	0.03	0.01	0.01	0.04	0	0.02	0.49	0.76	0.29	0.27	0.19	0.17	0.16	0.08	0.13	0.04	0.1	0.04	0.04	0.05	0.03	0.04	0.34
ENSMMUG00000002266	0.15	0.09	0.1	0.17	0.12	0.08	0.11	0.13	0.02	0.02	0.01	0.01	0.02	0.04	0.12	0	0.04	0.06	0.01	0.06	0	0.03	0.01	0	0.02	0.06	0.09	0.08	0.05	0.05	0.06	0	0.22	0.35	0.04	0.13	0.1	0.08	0.12	0.04	0.05	0.03	0	0	0	0.02	0.01	0	0.05
ENSMMUG00000002268	0.4	0.53	0.73	0.34	0.35	0.63	1.18	0.63	0.3	0.16	0.25	0.14	0.4	0.62	0.51	0.45	0.31	0.14	0.47	0.44	0.95	0.73	0.56	0.79	1.65	1.79	2.41	2.18	1.66	5.35	2.39	3.61	1.32	0.61	0.79	0.99	1.09	1.31	1.6	1.8	0.26	0.32	1.11	1.64	1.34	2.62	3.1	2.29	0.29
ENSMMUG00000002279	0.04	0.03	0.05	0.07	0.03	0.01	0.14	0.15	0.07	0.2	0.04	0.2	0.25	0.21	0.25	0.39	0.29	0.17	0.13	0.21	0.26	0.07	0.24	0.23	0.09	0.05	0.05	0.02	0.15	0.04	0.06	0.22	0.21	0.05	0.14	0.12	0	0.13	0.22	0.09	0.2	0.13	0.2	0.22	0.03	0	0.41	0.27	0.13
ENSMMUG00000002280	2.75	3.11	2.49	2.44	2.2	2.19	2.41	2.8	1.66	2.62	1.78	2.53	2.57	1.91	2.82	2.82	2.02	2.5	1.98	2.19	1.68	2.16	1.66	2.49	3	2.26	2.82	3.49	2.07	3.16	2.14	2.64	5.44	4.81	3.55	3.21	3.69	2.72	2.42	4.06	3.33	2.4	4.06	3.42	1.73	1.81	2.29	2.22	2.35
ENSMMUG00000002288	0.13	0.11	0.17	0.1	0.14	0.16	0.13	0.13	0.14	0.15	0.14	0.17	0.23	0.15	0.15	0.17	0.21	0.06	0.15	0.16	0.08	0.23	0.25	0.23	0.17	0.17	0.15	0.23	0.29	0.19	0.26	0.24	1.79	2.39	0.82	1.04	0.78	1.35	0.56	0.81	0.24	0.26	0.26	0.29	0.21	0.24	0.25	0.35	0.22
ENSMMUG00000002295	2.4	2.08	3.54	0.88	1.07	0.87	1.42	0.81	7.25	17.07	44.18	23.48	51.12	40.56	33.67	35.62	6.98	8.69	15.59	23.24	8.85	14.8	6.54	2.74	2.66	3.47	2.21	1.07	2.37	4.91	3.24	1.86	10.71	13.85	8.73	10.44	14.8	9.08	12.09	17.45	10.84	8.75	15.81	9.94	19.7	28.35	19.11	22.2	13.64
ENSMMUG00000002296	0.31	0.49	0.82	0.25	0.33	0.58	0.76	0.5	0.54	1.04	0.51	0.51	0.39	0.23	0.69	0.68	0.55	0.81	0.56	0.5	0.48	0.9	0.12	0.22	0.49	0.73	0.73	0.37	0.48	0.59	0.9	1.02	3.81	1.23	1.41	0.68	0.7	0.72	0.6	0.76	1.13	1.22	0.51	0.8	0.95	0.92	0.81	0.77	1.84
ENSMMUG00000002299	3.78	3.46	6.1	4.1	3.62	3.51	3.26	2.88	7.35	9.68	10.89	11.79	11.54	11.1	12.29	9.68	9.22	7.39	7.71	8.42	9.89	9.11	11.63	9.18	6.75	6.12	5.78	4.1	4.71	5.3	4.88	5.01	0	0.05	0.24	0.31	0.7	0.23	0.37	0.19	20.6	18.04	20.02	19.52	22.62	23.6	20.81	20.16	17.11
ENSMMUG00000002305	0.03	0	0	0.01	0.04	0.03	0.03	0.02	0.06	0.05	0.06	0.11	0.1	0.05	0.03	0.08	0.09	0.03	0.07	0.08	0.08	0.04	0.07	0	0.05	0.05	0.01	0	0.03	0.03	0.02	0	0.01	0.01	0	0.02	0.02	0.02	0.01	0.01	0.03	0	0.02	0.02	0	0	0.02	0	0.11
ENSMMUG00000002308	0	0	0.01	0	0	0	0.03	0.01	0.02	0.01	0	0	0	0	0.02	0	0.01	0	0.09	0.02	0.01	0	0	0.07	0	0.05	0	0	0	0	0	0	0	0	0.02	0	0.06	0	0	0.04	0	0	0.02	0.01	0.05	0	0.02	0.06	0.02
ENSMMUG00000002312	0.15	0	0.17	0.14	0.12	0.07	0.13	0.09	0.03	0.03	0.08	0.02	0.02	0.05	0.02	0.15	0	0.03	0.05	0.09	0.07	0.1	0.06	0	0.08	0.12	0.02	0.02	0.08	0.04	0.05	0.07	0.12	0.12	0.15	0.17	0.11	0.1	0.21	0.07	0.11	0.21	0.43	0.52	0.06	0.21	0.16	0.22	0.09
ENSMMUG00000002313	0	0.12	0	0.02	0.05	0	0.07	0.11	0.09	0.05	0	0	0.12	0	0.03	0	0.04	0	0.02	0	0.14	0	0	0	0	0	0	0	0	0	0.22	0.07	0	0.09	0.07	0.08	0.06	0	0.09	0.06	0	0	0.02	0.13	0.09	0	0	0.02	0.05
ENSMMUG00000002314	0.83	0.64	0.79	0.47	0.21	0.33	0.16	0.31	2.17	2.29	1.27	0.88	1.19	0.67	1.04	1.36	1.72	2.18	1.37	1.1	1.03	0.83	0.66	1.16	1.34	1.59	1.11	0.84	0.59	0.57	0.64	0.73	0.08	0.03	0.03	0.02	0	0.07	0.06	0	1.55	1.62	0.49	0.52	0.74	0.28	0.27	0.46	2.12
ENSMMUG00000002318	0.06	0.03	0.01	0.03	0.04	0.08	0.03	0.02	0.23	0.19	0.16	0.24	0.1	0.06	0.14	0.21	0.48	0.33	0.36	0.47	0.4	0.07	0.18	0.13	0.16	0.05	0.02	0.02	0.03	0.03	0.15	0.36	0.13	0.07	0.05	0.05	0.05	0.08	0.07	0.06	0.45	0.27	0.04	0.02	0.06	0.06	0.05	0.18	0.16
ENSMMUG00000002326	0.01	0.02	0	0.02	0	0.01	0	0	0	0	0	0.02	0	0.02	0.04	0	0.02	0.01	0.12	0	0	0	0	0.04	0	0	0	0.05	0	0.04	0.06	0	0	0	0.01	0.08	0.09	0.01	0	0.02	0.01	0.08	0.03	0	0	0	0	0.04	0
ENSMMUG00000002327	3.93	3.72	3.19	3.97	4.52	4.88	3.71	4.17	3.85	3.43	4.03	3.32	3.43	3.45	3.47	3.4	2.21	1.89	2.44	2.86	1.89	2.34	2.5	1.71	1.78	2.41	2.58	2.9	2.9	2.22	3.07	2.34	7.13	6.89	6.02	6.57	2.28	1.13	2.73	1.79	4.56	4.52	3.82	3.84	4.46	5.25	4.51	4.82	8.56
ENSMMUG00000002333	0.04	0	0.01	0.01	0.02	0	0	0	0.01	0.04	0.02	0.01	0	0	0.02	0.01	0	0	0.01	0.01	0.01	0.02	0.01	0	0.03	0.01	0.01	0.06	0	0	0	0	0.03	0.02	0.06	0.13	0.03	0.03	0.06	0.07	0.07	0.03	0.11	0.07	0.14	0.2	0.32	0.36	0.02
ENSMMUG00000002343	0.66	1.06	4.13	1.56	2.2	1.72	2.48	2.44	1.64	0.98	2.18	3.8	3.81	3.74	4.43	2.37	1.19	0.51	1.86	2.29	2.18	2.49	3.84	1.91	1.46	1.6	1.86	2.95	1.94	2.73	3.33	2.05	1.36	2.43	0.94	2.43	2.52	3.18	3.33	3.17	0.88	1.06	2.34	3.47	1.82	2.12	1.94	3.18	2.1
ENSMMUG00000002347	0	0.04	0.06	0.03	0	0.01	0.01	0.02	0.23	0.36	0.51	0.53	0.37	0.17	0.34	0.38	0.26	0.27	0.1	0.86	0.05	0.37	0	0.07	0.03	0.06	0.02	0	0.03	0	0	0.05	0	0.08	0.07	0.05	0.02	0.03	0.11	0.16	0.21	0.24	0.31	0.67	0.23	0.24	0.55	0.32	0.35
ENSMMUG00000002349	0.02	0.04	0.03	0.02	0.03	0.01	0.04	0.01	0	0	0.02	0	0.05	0.02	0	0.03	0	0.02	0.02	0.03	0.01	0.01	0.06	0.1	0.05	0.01	0.07	0.02	0.05	0.04	0.04	0.11	0	0.08	0.01	0.01	0	0.02	0.07	0.02	0.04	0.02	0	0.02	0.03	0.06	0.04	0.06	0.03
ENSMMUG00000002350	3.99	1.57	1.4	1.72	1.19	0.93	1.61	2.51	2.41	2.54	1.26	1.7	1.36	0.82	1.41	2.36	2.17	1.9	1.94	2.58	1.77	1.24	1.26	1.89	2.23	2.2	1.62	1.91	1.13	1.16	1.65	3.02	2.27	2.26	1.56	2.24	1.23	1.37	1.56	2.32	1.84	2.1	1.74	1.95	2.47	1.33	1.65	2.38	3.96
ENSMMUG00000002352	0	0.12	0.1	0.07	0.05	0	0	0.16	0.66	0.39	0.51	0.27	0.29	0	0	0.59	0.28	0.18	0.21	0.65	0.69	0.03	0.1	0.11	0.1	0.27	0.13	0	0.24	0	0	0.36	0.09	0.16	0.35	0.07	0.13	0.01	0.01	0.2	0.17	1.18	0.72	0.47	0.65	0.11	0.26	0.41	0.81
ENSMMUG00000002353	0.1	0	0.02	0.06	0.02	0.03	0.02	0.05	0	0.04	0.01	0	0.02	0.02	0.01	0.03	0.01	0	0.03	0.02	0	0.04	0.01	0.02	0.05	0	0.02	0.03	0	0	0	0.06	0.04	0.03	0.01	0.02	0.07	0.03	0.05	0.02	0.04	0	0.05	0.08	0.07	0	0.08	0.05	0.12
ENSMMUG00000002365	1.08	0.97	0.38	0.67	0.45	0.4	0.35	0.72	0.26	0.36	0.58	0.46	0.76	0.78	0.77	0.98	0.15	0.31	0.6	0.31	0.96	0.66	0.88	0.35	0.85	0.7	0.31	0.46	0.49	1.11	0.47	0.68	2.93	3.57	3.77	3.6	4.02	4.18	4.83	3.47	0.63	1.99	2.2	1.6	1.69	2.28	2.58	1.74	0.86
ENSMMUG00000002366	0.81	1.16	0.9	0.88	0.82	0.71	0.52	0.43	2	1.65	1.71	1.39	1.22	1.4	1.01	1.24	2.02	2.32	2.13	1.76	1	1.54	1.21	1.04	1.51	1.95	0.8	0.8	0.55	0.97	0.64	0.6	305.38	311.88	340.49	249.04	164.11	187.19	200.5	145.38	30.76	42.28	26.01	25	22.49	25.49	22.13	21.02	36.82
ENSMMUG00000002375	0.02	0.05	0.05	0	0.01	0.05	0.05	0.04	0.05	0.03	0.09	0.1	0.04	0.08	0.24	0.11	0.02	0.05	0.06	0.04	0.05	0.05	0.07	0.09	0.01	0.06	0.09	0.1	0.03	0.13	0.05	0.02	0.36	0.36	0.18	0.21	0.14	0.62	0.6	0.43	0.04	0.02	0.13	0.05	0.05	0.01	0.11	0.12	0.11
ENSMMUG00000002376	0.16	0.24	0.24	0.21	0.11	0.15	0.14	0.1	0.25	0.25	0.19	0.23	0.07	0.18	0.28	0.21	0.29	0.28	0.19	0.14	0.04	0.08	0.19	0.08	0.1	0.39	0.25	0.24	0.25	0.13	0.36	0.06	1.43	2.03	1.63	2.86	1.8	2.83	1.42	1.55	0.88	0.52	0.69	0.68	0.71	0.86	0.9	0.55	0.6
ENSMMUG00000002377	0.73	0.65	0.53	0.81	0.52	0.37	0.65	0.7	0.4	0.72	0.56	0.61	0.46	0.63	0.73	0.71	0.64	0.63	0.44	0.53	0.56	0.51	0.58	0.62	0.52	0.67	0.37	0.38	0.39	0.67	0.68	0.6	1	0.98	0.93	1.12	1.13	1.45	1.32	1.27	0.53	0.54	0.52	0.81	0.43	0.42	1.01	0.62	0.59
ENSMMUG00000002382	0.65	0.51	0.7	1	0.94	0.79	0.91	1.04	0.08	0.06	0.34	0.22	0.35	0.25	0.41	0.3	0.12	0.11	0.43	0.2	0.21	0.4	0.91	0.3	0.25	0.1	0.49	0.4	0.38	0.5	0.56	0.46	0.28	0.19	0.86	0.34	0.56	0.69	0.82	0.54	0.4	0.08	0.53	0.37	0.84	0.8	0.61	0.49	0.17
ENSMMUG00000002383	0.2	0.3	0.09	0.7	0.22	0.13	0.32	0.1	0	0.09	0.35	0.45	0.52	0.14	0.32	0.49	0.42	0.38	0	0.12	0.29	0.1	0.15	0.28	0.12	0.3	0.05	0.78	0.59	1.42	0.13	0.71	0.07	0.39	0.1	0.38	0.17	0.12	0.16	0.41	0	0.16	0.27	0.17	0.78	0.1	0.66	0.32	0.22
ENSMMUG00000002384	0.36	0.37	0.59	0.36	0.21	0.33	0.28	0.27	0.3	0.46	0.5	0.47	0.44	0.8	0.56	0.39	0.58	0.19	0.8	0.55	0.49	0.5	0.58	0.37	0.7	0.76	0.37	0.23	0.44	0.61	0.43	0.38	1.19	1	1.15	1.03	0.98	1.29	1.04	1.03	0.63	0.82	0.86	0.86	1.29	1.24	0.82	0.88	0.98
ENSMMUG00000002388	0.1	0.15	0.05	0.06	0.12	0.04	0.16	0.16	0.08	0.03	0.06	0.14	0.29	0.07	0.18	0.15	0.13	0.09	0.04	0.1	0.1	0.16	0.1	0.17	0.07	0.16	0.23	0.38	0.18	0.25	0.1	0.2	0.33	0.16	0.33	0.36	0.58	0.28	0.11	0.27	0.18	0.27	0.21	0.48	0.3	0.27	0.37	0.4	0.25
ENSMMUG00000002389	6.39	5.53	11.56	3.82	6.18	4.49	6.68	6.86	25.83	30.59	52.86	23.99	49.03	40.94	37.22	39.34	29.92	28.48	38.39	20.64	47.47	42.32	66.87	51.93	14.79	13.99	15.62	4.51	10.65	11.98	11.7	7.85	8.95	9.77	17.66	8.45	33.28	24.09	32.74	22.7	40.04	34.34	46.54	26.08	58.24	45.9	33.46	52.99	32.63
ENSMMUG00000002392	0.57	0.21	0.48	0.44	0.8	0.64	0.25	0.48	0.5	0.81	0.52	0.66	0.59	0.65	0.49	0.39	0.54	0.43	0.5	0.34	0.82	0.31	0.52	0.81	0.39	0.48	0.33	0.29	0.49	0.06	0.31	0.21	0.19	0.38	0.42	0.87	0.64	0.44	0.61	0.48	0.76	0.94	0.77	0.93	0.99	0.62	1.01	0.86	0.84
ENSMMUG00000002409	0.68	0.5	0.53	0.61	0.23	0.55	0.58	0.52	0.59	0.54	1.19	0.92	1.03	1	1.09	0.97	0.24	0.17	0.58	0.74	0.54	0.53	1.03	0.86	0.49	0.69	1.39	0.73	0.82	1.42	1.48	1.35	0.69	0.67	0.6	0.77	0.85	0.8	0.98	0.67	0.4	0.54	0.7	0.69	0.75	0.72	0.84	0.93	0.95
ENSMMUG00000002418	0.09	0.06	0.12	0.04	0.06	0.05	0.09	0.03	0.06	0.03	0.03	0.02	0.08	0.02	0.06	0.02	0.1	0.04	0.08	0.08	0.03	0.08	0.08	0.05	0.08	0.12	0.07	0.13	0.08	0.01	0.06	0.08	0.06	0.05	0.02	0.06	0.03	0.02	0.06	0.01	0.06	0.09	0.09	0.12	0.07	0.05	0.05	0	0.09
ENSMMUG00000002419	0.83	0.6	2.18	0.96	0.82	0.62	0.77	1.02	0.35	0.76	1.24	0.63	0.2	0.64	0.23	0.22	0.88	0.22	1.47	0.64	0.67	0.43	0.25	0.47	0.98	0.85	3.1	1.52	1.01	1.02	0.59	1.4	0.53	0.55	2.03	0.78	0.72	0.94	0.4	0.7	0.6	0.56	2.58	0.73	0.77	0.67	0.68	0.45	0.93
ENSMMUG00000002420	0.02	0.01	0.02	0	0.03	0.02	0.01	0.01	0.01	0	0	0	0	0	0.01	0.03	0.03	0.02	0.02	0	0	0.04	0.03	0	0.05	0.01	0.04	0	0.01	0.03	0	0.04	0.13	0.04	0.09	0.03	0.08	0.08	0.12	0.03	0.06	0.03	0.03	0.04	0.06	0.03	0.12	0.11	0.05
ENSMMUG00000002421	0.08	0.05	0.11	0.1	0.04	0.04	0.02	0.12	0.11	0.09	0.14	0.17	0.23	0.05	0.12	0.15	0.08	0.12	0.09	0.21	0.07	0.14	0.15	0.05	0.18	0.11	0.11	0.13	0.08	0.12	0.11	0.04	0.66	0.26	0.24	0.12	0.15	0.2	0.27	0.34	0.21	0.26	0.1	0.02	0.08	0	0.17	0.14	0.22
ENSMMUG00000002425	0.25	0.16	0.17	0.31	0.04	0.07	0.04	0.1	0.01	0	0.02	0	0	0.02	0.01	0.02	0	0	0	0	0	0	0	0.04	0.25	0.64	0.6	0.16	0.08	0.09	0.04	0.06	0.42	0.09	0.3	2.6	0.32	3.47	2.06	0.2	0	0.04	0.01	0.02	0.01	0	0.02	0.01	0
ENSMMUG00000002426	0.25	0.44	0.51	0.53	0.36	0.16	0.28	0.33	0.84	0.63	0.63	1.37	0.38	1.16	0.56	1.01	0.94	1.39	0.6	0.72	0.39	0.47	1.06	0.97	0.3	0.71	1.02	0.63	0.39	0.52	0.65	1.05	1.79	1.12	1.27	2.47	1.06	1.74	0.99	1.58	1.51	0.44	0.96	0.44	0.41	0.71	0.5	0.67	1.07
ENSMMUG00000002431	0.22	0.11	0.14	0.14	0.12	0.14	0.12	0.1	0.34	0.31	0.14	0.29	0.14	0.18	0.11	0.22	0.24	0.16	0.19	0.22	0.1	0.17	0.15	0.13	0.18	0.21	0.18	0.25	0.14	0.12	0.17	0.1	21.09	23.01	16.83	19.66	15.48	13.46	13.26	16.22	3.85	3.95	2.55	2.22	2.7	3.11	2.68	2.31	2.82
ENSMMUG00000002432	0	0	0	0	0.04	0.12	0.02	0.05	0	0	0.02	0	0	0	0.01	0	0	0	0.01	0	0	0	0	0	0	0	0	0	0	0	0.08	0	3.61	2.3	0.51	1.56	0.4	0.4	0.31	0.5	0	0	0.06	0.02	0.03	0.03	0	0.01	0.04
ENSMMUG00000002435	0.15	0.08	0.17	0.11	0.12	0.1	0.22	0.13	0.13	0.29	0.38	0.19	0.4	0.36	0.3	0.57	0.13	0.21	0.33	0.23	0.2	0.23	0.21	0.19	0.13	0.12	0.19	0.2	0.14	0.19	0.2	0.12	2.01	1.69	1.29	1.41	0.81	0.97	1.03	1.03	0.84	0.86	1.1	0.76	1.72	1.97	1.02	1.42	0.89
ENSMMUG00000002436	0.14	0.16	0.21	0.19	0.18	0.26	0.1	0.18	0.14	0.25	0.19	0.23	0.25	0.58	0.28	0.3	0.24	0.16	0.92	0.55	0.71	0.99	0.94	0.65	0.45	0.37	0.48	0.2	0.34	0.31	0.29	0.48	0.72	0.46	0.65	1.1	1.33	1.06	1.46	1.04	1.1	1.08	2.16	1.76	1.26	1.84	1.53	2.17	0.37
ENSMMUG00000002438	1.09	1.08	2.16	0.72	0.47	0.34	0.71	0.6	0.61	0.94	1.03	0.76	0.71	0.52	0.71	0.37	0.87	0.53	1.22	1.32	0.93	0.67	0.65	0.76	0.79	1.16	2.39	1.04	1.07	1.42	0.59	1.2	0.33	0.22	0.57	0.22	0.51	0.65	0.19	0.45	1.02	0.35	0.96	0.7	0.73	0.21	0.44	0.29	0.69
ENSMMUG00000002439	0.64	0.47	0.4	0.6	0.5	1.04	0.18	0.72	0.25	0.34	0.6	0.52	0.64	0.46	0.53	0.6	0.5	0.24	0.31	0.48	0.09	0.31	0.21	0.23	0.5	0.29	0.14	0.56	0.24	0.04	0.17	0.38	0.27	0.46	0.35	0.29	0.5	0.39	0.29	0.24	0.7	0.3	0.65	0.48	0.34	0.87	0.46	0.49	0.4
ENSMMUG00000002455	0.1	0.32	0.19	0.24	0.12	0.17	0.03	0.07	0.01	0.01	0	0	0.02	0.05	0.07	0.12	0	0	0.01	0	0.17	0.01	0.01	0.06	0.06	0.13	0.62	0.51	0.35	0.66	0.26	0.29	0	0	0.01	0.04	0	0.06	0	0.03	0.02	0	0.04	0.05	0.06	0.08	0.04	0.01	0.02
ENSMMUG00000002457	0.2	0.37	0.29	0.21	0.18	0.15	0.19	0.15	0.24	0.29	0.34	0.3	0.48	0.35	0.37	0.37	0.34	0.24	0.46	0.6	0.48	0.18	0.2	0.31	0.26	0.38	0.28	0.25	0.37	0.53	0.43	0.6	0.19	0.31	0.4	0.88	0.7	0.53	0.37	0.32	0.31	0.15	0.18	0.18	0.59	0.23	0.66	0.06	0.22
ENSMMUG00000002467	0.09	0.11	0.06	0	0.03	0.03	0.15	0.04	0.08	0	0.06	0.02	0	0	0.08	0.06	0.03	0.17	0.05	0	0.07	0.17	0	0.01	0.11	0.01	0.04	0.07	0.1	0	0.02	0.09	0.09	0.04	0.11	0.12	0.02	0.11	0.12	0.02	0.08	0.03	0.05	0.04	0	0.03	0	0.17	0.01
ENSMMUG00000002468	0.04	0.02	0.05	0.01	0	0.01	0.01	0	0.46	0.64	0.45	0.39	0.35	0.84	0.17	0.29	0.32	0.22	0.06	0.05	0.13	0.27	0.07	0.15	0.23	0.18	0.03	0.05	0.03	0.08	0.02	0	0.01	0	0.01	0.02	0.02	0	0.05	0	0.91	0.73	0.2	0.21	0.27	0.23	0.04	0.15	0.73
ENSMMUG00000002471	0	0.42	0	0	0.09	0.12	0.24	0.12	0.08	0.25	0.11	0.1	0.29	0.06	0.21	0.09	0.18	0	0.03	0.08	0.07	0	0	0.03	0.04	0.08	0.4	0	0.64	0.83	0.37	0.06	0	0	0	0.04	0.05	0.14	0	0.09	0.18	0.03	0	0.08	0.06	0	0	0	0.48
ENSMMUG00000002477	0.01	0	0.04	0.03	0.01	0.03	0.01	0.1	0.01	0.01	0.01	0.01	0.02	0	0	0	0	0	0	0.01	0	0	0	0	0.02	0	0	0.03	0.02	0	0.06	0.03	0	0	0.05	0	0	0.01	0	0	0	0.02	0	0.01	0.05	0	0	0.05	0.02
ENSMMUG00000002480	0.57	0.56	0.72	0.8	1.28	1.45	0.77	0.66	0.57	0.33	0.25	0.44	0.32	0.29	0.23	0.31	0.17	0.58	0.59	0.55	0.29	0.33	0.28	0.21	0.22	0.37	0.32	0.3	0.35	0.27	0.44	0.14	1.76	2.26	1.07	0.2	0.32	0.76	0.38	0.15	1.16	2.4	1.44	1.96	1.22	2.78	1.8	0.99	1.82
ENSMMUG00000002482	0.3	0.29	0.47	0.11	0.08	0.2	0	0.06	0.04	0.19	0.31	0.1	0.14	0.24	0.08	0.09	0	0.19	0.62	0.26	0.06	0.3	0	0.28	0.07	0.15	0.66	0.25	0.17	0.36	0.35	0.23	0.15	0.17	0.11	0	0.25	0	0.27	0.08	1.05	0.14	1.62	0.33	0.45	0.36	0.45	0.27	0.08
ENSMMUG00000002488	0.14	0.08	0.15	0.07	0.04	0.08	0.02	0.04	0.34	0.41	0.35	0.31	0.39	0.56	0.29	0.34	0.15	0.23	0.46	0.74	0.2	0.36	0.23	0.4	0.18	0.22	0.18	0.04	0.09	0.11	0.21	0.12	2	1.83	2.04	1.83	1.82	2.74	1.66	1.41	2.22	1.61	0.83	0.96	1.01	1.62	1.82	1.33	0.88
ENSMMUG00000002492	0.34	0.56	0.64	0.4	0.48	0.34	0.49	0.51	0.46	0.31	1.12	0.68	0.81	0.88	0.76	0.59	0.35	0.33	0.82	0.61	0.72	0.72	0.84	0.6	0.52	0.54	0.72	0.55	0.53	0.8	0.82	0.62	0.65	0.57	0.64	0.98	1.09	1	1.09	0.78	0.89	1.3	1.4	1.23	2.21	1.43	2.36	1.6	0.84
ENSMMUG00000002493	0	0.01	0.02	0.01	0.03	0.04	0	0.04	0.14	0.06	0.05	0.03	0.06	0.02	0	0.01	0.06	0.14	0.01	0.01	0.02	0.07	0	0.09	0.01	0.02	0.06	0	0.03	0	0.04	0	0.17	0.13	0.04	0.04	0	0.05	0.04	0	2.33	4.06	2.29	3.31	2.07	1.33	0.71	2.54	0.81
ENSMMUG00000002494	0.04	0.05	0.05	0.03	0.05	0.06	0.03	0.04	0.1	0.16	0.34	0.31	0.57	0.25	0.39	0.39	0.17	0.09	0.25	0.16	0.24	0.2	0.27	0.19	0.12	0.05	0.1	0.17	0.11	0.01	0.09	0.05	0.32	0.29	0.21	0.32	0.39	0.24	0.34	0.3	0.21	0.12	0.24	0.19	0.31	0.28	0.4	0.31	0.11
ENSMMUG00000002500	0.15	0.24	0.15	0.19	0.25	0.13	0.16	0.21	0.19	0.23	0.03	0.22	0.21	0.12	0.41	0.53	0.11	0.04	0.11	0.24	0.26	0.21	0.03	0.3	0.54	0.46	0.03	0	0.34	0.71	0.34	0.29	0.85	0.55	0.7	0.75	0.42	1.15	0.48	1.18	0.59	0.59	0.73	0.23	0.68	0.33	0.55	0.22	0.49
ENSMMUG00000002508	0.1	0.11	0.16	0.03	0.07	0.11	0.06	0.2	0.07	0.13	0.08	0.1	0.11	0.2	0.12	0.22	0.02	0.04	0.12	0.16	0.16	0.15	0.1	0.07	0.13	0.05	0.09	0.11	0.04	0	0.01	0.02	0.75	0.72	0.53	0.74	0.57	0.35	0.56	0.5	0.81	1.4	0.96	0.93	1.04	0.6	0.9	1.08	0.7
ENSMMUG00000002511	1.34	1.01	0.91	0.88	1.14	1.01	0.76	1.34	0.71	1.26	1.24	0.91	1.35	0.89	1.14	0.65	0.36	0.47	1.23	0.64	0.75	0.45	0.09	0.84	0.93	1.3	0.52	0.54	0.43	0.91	0.58	0.59	0.42	0.22	0.78	0.93	0.7	0.37	0.61	0.33	1.16	0.78	0.47	0.55	0.92	1.12	0.65	0.78	0.92
ENSMMUG00000002518	0.05	0.14	0.1	0.06	0.1	0.07	0.08	0.08	0.11	0.11	0.07	0.06	0.02	0.07	0.08	0.08	0.04	0.04	0.05	0.11	0.01	0.06	0.06	0.07	0.12	0.13	0.08	0.07	0.03	0.02	0.14	0.13	0.1	0.12	0.16	0.09	0.11	0.03	0.05	0.05	0.16	0.1	0.02	0.09	0.12	0.01	0.1	0.14	0.09
ENSMMUG00000002527	0	0	0	0	0	0.02	0	0	0	0.11	0.11	0.04	0	0	0.03	0	0	0	0.04	0	0.07	0.02	0	0.11	0.11	0	0	0	0	0	0	0	0	0.02	0.1	0	0	0.25	0.2	0	0	0	0	0.11	0.26	0	0	0	0
ENSMMUG00000002529	0.15	0.1	0.15	0.09	0.03	0.07	0.03	0.05	0.1	0.13	0.05	0.09	0.09	0.03	0.07	0.04	0.04	0.13	0.1	0.15	0.02	0.01	0.09	0.01	0.3	0.06	0.2	0.06	0.09	0.21	0.05	0.12	0.1	0.18	0.09	0.06	0.14	0.1	0.08	0.05	0.12	0.08	0.16	0.02	0.11	0.03	0.05	0.03	0.19
ENSMMUG00000002533	1.29	0.85	1.68	0.5	0.51	0.35	0.57	0.38	2.51	2.47	3.18	2.86	3.13	3.31	3.35	3.22	1.95	2.23	2.02	2.82	1.84	2.3	1.88	1.65	2.2	2.11	1.59	0.87	0.74	1.09	0.93	0.82	0.82	1.02	0.68	0.62	1.12	0.46	0.88	1.19	2.83	3.7	5.24	3.77	4.39	5.82	4.26	4.9	2.46
ENSMMUG00000002535	0.57	0.83	0.64	0.65	0.5	0.5	1.11	0.91	0.59	0.36	0.67	0.56	0.41	0.48	0.53	0.48	0.42	0.89	1.11	0.67	0.53	0.59	0.89	0.7	1	1.67	1.61	1.43	0.94	1.1	1	1.77	0.32	0.36	0.63	0.35	0.26	0.33	0.3	0.66	0.36	0.52	0.71	0.81	0.32	0.49	0.65	0.55	0.53
ENSMMUG00000002538	0.06	0.1	0	0.02	0.05	0	0	0.03	0	0	0	0	0	0	0	0	0	0	0	0	0.03	0	0	0.12	0	0	0	0	0	0	0	0	0	0.03	0	0.04	0	0.12	0.04	0.04	0.03	0.03	0.03	0.02	0	0	0	0.1	0
ENSMMUG00000002549	0.02	0.06	0.02	0.02	0.04	0.08	0.04	0.04	0.03	0.01	0.09	0.06	0.06	0.01	0.06	0.05	0.01	0.03	0.04	0.04	0.02	0.01	0.03	0.05	0.01	0.02	0.08	0.02	0.05	0.01	0.01	0.04	0	0	0	0.09	0.02	0.01	0.05	0	0.01	0.05	0.01	0.01	0	0.1	0.03	0.04	0.07
ENSMMUG00000002551	1.66	1.85	2.1	2.46	2.82	2.96	2.9	2.99	0.06	0.07	0.03	0.05	0.01	0.03	0.03	0.04	0.05	0	0.08	0.03	0.08	0.01	0.04	0.01	0.13	0.33	0.28	0.99	1.14	0.41	0.75	0.9	0.08	0.07	0.04	0.12	0.12	0.02	0.06	0.15	0.06	0.02	0.09	0.04	0	0.03	0.09	0.06	0.04
ENSMMUG00000002553	0.45	0.15	0.11	0.1	0.04	0.07	0.03	0.19	0.51	0.86	0.51	0.77	0.59	0.37	0.53	0.43	0.67	0.66	0.23	0.69	0.6	0.3	0.19	0.37	1.11	0.34	0.05	0.03	0.02	0.13	0.11	0.04	0.05	0.02	0.01	0.03	0.03	0.05	0.01	0.05	1.64	1.84	0.58	1.01	0.62	0.47	0.29	0.55	2.5
ENSMMUG00000002555	0.04	0.04	0.06	0.04	0.01	0.02	0.01	0.15	0.05	0.04	0.08	0.05	0.08	0.02	0.08	0.2	0.02	0.03	0.01	0.09	0.01	0.02	0.06	0.21	0.03	0.14	0.03	0.06	0.04	0.04	0.04	0.17	0.83	0.8	0.61	1.02	1.19	1.08	0.9	0.81	0.1	0.17	0.12	0.23	0.39	0.31	0.31	0.58	0.02
ENSMMUG00000002558	1.87	1.65	3.38	2.31	2.46	1.72	1.61	0.94	5.46	7.59	5.54	5.54	3.46	3.86	4.92	3.98	6.82	3.19	2.23	3.5	2.05	2.78	3.25	1.52	4.71	3.81	4.74	3.57	3.05	4.87	2.79	3.54	0.14	0.19	0.24	0.56	0.45	0.13	0.24	0.15	7.39	5.47	2.21	2.21	1.99	2.52	3.12	1.94	8.53
ENSMMUG00000002564	0.86	0.86	0.67	0.55	0.56	0.69	0.41	0.56	1.49	1.82	1.22	1.06	1.13	0.82	0.65	0.84	1.6	0.94	0.92	0.85	0.63	0.78	0.51	0.72	1.51	1.02	0.78	0.5	0.54	0.56	0.6	0.58	0.81	0.91	0.61	0.66	0.42	0.51	0.36	0.71	4.86	4.73	3.66	3.32	3.08	3.39	2.51	2.72	3.35
ENSMMUG00000002567	0.1	0.02	0.08	0.08	0.13	0.35	0.11	0.14	0.14	0.2	0.13	0.15	0.04	0.08	0.02	0.15	0.06	0.04	0.01	0.07	0.01	0.35	0.01	0.04	0.08	0.05	0.04	0	0.02	0.04	0	0.02	0.12	0.07	0.08	0.24	0.23	0.16	0.23	0.09	0.1	0.09	0.02	0.08	0.03	0.05	0.19	0.02	0.12
ENSMMUG00000002570	0.14	0.32	0.11	0.15	0.17	0.12	0.22	0.09	0.21	0.24	0.36	0.11	0.16	0.19	0.37	0.4	0.21	0.25	0.26	0.09	0.12	0.17	0.42	0.28	0.24	0.2	0.23	0.2	0.08	0.49	0.24	0.18	0.2	0.17	0.25	0.16	0.2	0.09	0.16	0.26	0.29	0.15	0.2	0.09	0.1	0.26	0.42	0.22	0.18
ENSMMUG00000002572	0.02	0.09	0.02	0.12	0.11	0.22	0	0.06	0.21	0.1	0.13	0.03	0.27	0.2	0.03	0.03	0.26	0.09	0.13	0.1	0.04	0.1	0	0.06	0.12	0	0.03	0.03	0.17	0.03	0	0.07	0.62	0.39	0.1	0.4	0.28	0.4	0.28	0.23	0	0.05	0.03	0.07	0.09	0.11	0	0.05	0
ENSMMUG00000002574	0.65	1.17	0.36	0.1	0.1	0.11	0.11	0.2	0.8	1.41	1.45	0.74	1.18	0.78	1.35	1.16	0.72	0.75	0.77	0.69	0.7	0.32	1.22	0.43	0.45	0.3	0.38	0.28	0.13	0.38	0.32	0.14	0.06	0.18	0.11	0.6	1.02	0.63	0.67	0.14	0.37	0.35	0.52	0.2	0.44	0.18	0.38	0.53	1.33
ENSMMUG00000002579	0.02	0.02	0.01	0.01	0.01	0.01	0	0.02	0.02	0.01	0.02	0.03	0.04	0	0	0.04	0.01	0.04	0.03	0.03	0.01	0.01	0.02	0.03	0.01	0.02	0.03	0.04	0.03	0.01	0.02	0.01	0.49	0.35	0.21	0.29	0.14	0.15	0.05	0.16	0.04	0.03	0.02	0.03	0.02	0.02	0.04	0.01	0.04
ENSMMUG00000002582	0.02	0.03	0.1	0.01	0.04	0.01	0	0.01	0.01	0.03	0.04	0.03	0.02	0	0.06	0.02	0.05	0.03	0.07	0.01	0.01	0.05	0	0	0.03	0.01	0.07	0.02	0.01	0.05	0.01	0.01	0.07	0.01	0	0	0.13	0	0.02	0	0	0.04	0.03	0.02	0.02	0.01	0.01	0.06	0.02
ENSMMUG00000002585	1.47	1.37	1.41	0.69	1.28	0.48	0.94	1.36	0.39	0.51	0.72	0.57	0.63	0.47	0.63	1.1	0.66	0.57	0.76	0.72	1.08	0.37	0.7	1.11	1.48	0.9	1.36	1.18	2.21	1.7	1.92	3.4	0.04	0.13	0.14	0.08	0.1	0.19	0.03	0.12	0.74	0.54	0.65	0.58	0.44	0.44	0.49	0.81	0.66
ENSMMUG00000002587	0.07	0.26	0.32	0.12	0.18	0.39	0.11	0.27	0.82	1.03	0.28	0.38	0.38	0.2	0.35	0.48	0.58	0.35	0.52	0.32	0.1	0.68	0.25	0.44	0.24	0.37	0.13	0.05	0.19	0.23	0.13	0.31	0.03	0.08	0.02	0	0	0.02	0.05	0.07	0.52	0.34	0.25	0.03	0.21	0.1	0.21	0.64	0.64
ENSMMUG00000002595	0.2	0.11	0.23	0.18	0.17	0.25	0.25	0.23	0.28	0.42	0.35	0.27	0.24	0.35	0.38	0.39	0.28	0.26	0.35	0.27	0.25	0.37	0.27	0.16	0.39	0.23	0.23	0.2	0.1	0.37	0.33	0.12	0.48	0.41	0.51	0.36	0.33	0.41	0.29	0.3	2.38	3.37	2.24	1.79	2.48	3.04	2.49	2.18	1.28
ENSMMUG00000002602	0	0.06	0.01	0.01	0	0.01	0.01	0	0.03	0.02	0.04	0.04	0.11	0	0.02	0.02	0.01	0.01	0	0	0	0	0	0	0.03	0.02	0.04	0	0	0	0	0	0.17	0.03	0.11	0.07	0	0	0.02	0.19	0.34	0.31	0.14	0.28	0.39	0.16	0.48	0.17	0
ENSMMUG00000002604	0.05	0.06	0	0.08	0.01	0.04	0	0.02	0.05	0	0.07	0.14	0.03	0.02	0.04	0.15	0.01	0.04	0.17	0.02	0.06	0.06	0.02	0.14	0.11	0.12	0	0	0	0	0.04	0	0.22	0.18	0.62	0.18	0.16	0.18	0.22	0.11	0.2	0.05	0	0.11	0.06	0.07	0.04	0.07	0.08
ENSMMUG00000002605	1.12	1.27	2.2	1.02	0.67	0.54	1.49	0.99	0.63	1.14	1.64	1.7	1.5	1.21	2.49	1.52	0.85	0.98	2.13	1.45	1.49	1.6	2.73	1.3	1.09	0.8	1.96	1.06	1.42	1.2	1.36	1.47	1.07	1.1	1.29	1.19	1.37	1.01	1.46	0.96	1.64	0.8	1.68	1.67	2.06	1.21	1.98	1.77	1.94
ENSMMUG00000002607	1	0.91	1.33	1.15	1.01	1.16	1.03	1.22	0.22	0.24	0.48	0.55	0.53	0.5	0.61	0.84	0.26	0.18	0.53	0.34	0.5	0.46	0.39	0.43	0.52	0.49	1.09	1.33	1.21	1.35	1.18	1.55	0.44	0.63	0.59	0.73	0.67	0.46	0.52	0.8	0.73	0.78	0.96	0.96	1.14	0.96	1.55	0.99	0.77
ENSMMUG00000002608	0.26	0.63	1.4	0.87	0.17	0.45	0.42	0.41	0.73	1.16	0.89	0.69	1.16	0.7	0.6	0.45	0.79	0.8	0.84	0.76	0.77	0.87	0.95	0.81	0.64	0.98	0.79	0.69	1.07	1.37	1.33	1.5	0.75	1.21	1.24	0.95	0.89	1.23	1.08	0.85	0.67	0.82	1	1.15	0.27	1.11	1.22	0.8	1.02
ENSMMUG00000002610	0.14	0.06	0.23	0.06	0.15	0.09	0.19	0.12	0.05	0.08	0.6	0.08	0.59	0.03	0.5	0.48	0.21	0.06	0.4	0.09	0.3	0.03	0.28	0.12	0.17	0.34	0.68	0.15	0.06	0.06	0.17	0.11	0.31	0.5	0.34	0.4	0.54	0.24	0.35	0.38	0.05	0.06	0.24	0.1	0.31	0.05	0.46	0.26	0.16
ENSMMUG00000002611	0.08	0.12	0.1	0.05	0.04	0.07	0.04	0.07	0.06	0.04	0	0.04	0.02	0.02	0.04	0.02	0.07	0.01	0.04	0.01	0.06	0.06	0.01	0	0.07	0.11	0.2	0.06	0.22	0.2	0.13	0.16	0.11	0.16	0.22	0.27	0.33	0.29	0.4	0.26	0	0.04	0.01	0.11	0.05	0.05	0.04	0.04	0.06
ENSMMUG00000002612	4.14	2.64	1.48	2.74	1.45	1.38	1.25	1.03	0.79	1.2	3.11	2.86	3.33	3.46	3.88	3.73	0.75	1.08	1.93	2.48	3.1	3.56	2.47	1.83	2.57	3.28	6.54	2.27	4.8	7.61	2.28	1.88	1.71	1.55	2.08	2.31	2.31	2.17	2.66	3.35	2.27	0.8	1.91	1.14	3.19	4.03	2.49	2.31	1.35
ENSMMUG00000002613	0.27	0.39	0.13	0.3	0.16	0.08	0.35	0.39	0.04	0.01	0	0	0.06	0.03	0.02	0.04	0.02	0.05	0.01	0.03	0	0.03	0.07	0.01	0.04	0.05	0.04	0.31	0.26	0.27	0.63	0.14	8.13	6.43	3.13	5.37	3.51	3.82	2.89	3.29	0.06	0.06	0.02	0.02	0.04	0.02	0.02	0.06	0.05
ENSMMUG00000002618	0	0	0	0	0.03	0	0	0	0	0	0	0	0	0	0	0	0	0	0	0	0	0	0	0.16	0	0	0	0	0	0	0	0	0	0	0	0	0	0	0	0	0.01	0	0.01	0	0	0.04	0	0	0
ENSMMUG00000002620	0.62	0.72	0.32	0.57	0.68	0.33	0.49	0.72	0.54	0.76	0.74	0.57	0.71	0.87	1.18	0.74	0.43	0.34	0.69	0.71	0.69	0.48	0.58	0.7	0.65	0.31	0.71	0.48	1.03	0.57	0.55	0.75	0.88	0.8	0.61	0.86	0.72	0.77	1.24	0.73	0.74	0.58	0.37	0.27	0.65	0.47	0.79	0.52	0.96
ENSMMUG00000002621	0.03	0.02	0.03	0.03	0.02	0.03	0.01	0.02	0.02	0.02	0.04	0.03	0.04	0.04	0.02	0.02	0.02	0.03	0.05	0.02	0.01	0.02	0	0	0.03	0.03	0.01	0.02	0.01	0.04	0.02	0.02	0.05	0.04	0.04	0.03	0.05	0.04	0.03	0.07	0.03	0.05	0.04	0.02	0.03	0.05	0.02	0.04	0.06
ENSMMUG00000002622	0.8	0.96	0.29	0.58	0.51	0.62	0.53	0.44	0.4	0.38	0.27	0.5	0.71	0.68	0.41	0.63	0.24	0.2	0.14	0.28	0.85	0.24	0.54	0.42	0.36	0.83	0.78	0.81	1.09	0.94	0.72	0.77	0.2	0.27	0.09	0.17	0.45	0.25	0.06	0.36	0.64	0.82	0.83	0.77	0.86	0.61	1.15	0.7	0.33
ENSMMUG00000002625	0	0	0	0	0	0	0	0	0	0	0	0	0	0	0	0	0	0	0	0	0	0	0	0	0	0	0	0	0	0	0	0	0.17	0.16	0.09	0.18	0.04	0.1	0.27	0.14	0.08	0.26	0.09	0.26	0.14	0.1	0.18	0.25	0.14
ENSMMUG00000002636	0.03	0	0	0.16	0.11	0.22	0	0.03	0.04	0.15	0.1	0.05	0.13	0.06	0.08	0.08	0	0.19	0.19	0	0	0	0	0.27	0	0.15	0	0.05	0	0	0	0	1.5	1	0.56	1.06	0.78	0.64	0.46	0.82	0.03	0.14	0.06	0.1	0.08	0	0	0.1	0.04
ENSMMUG00000002648	0.06	0.07	0.03	0	0.01	0.03	0.05	0	0	0.02	0	0.08	0.12	0	0.04	0.02	0	0	0.02	0.06	0.02	0	0	0.08	0	0.04	0	0.03	0	0	0	0	0.03	0.04	0.04	0.09	0.03	0.09	0.08	0.07	0	0.01	0	0	0.05	0.03	0.15	0.07	0.12
ENSMMUG00000002653	0.13	0.02	0.18	0.15	0.05	0.13	0.17	0.21	0.08	0.08	0.15	0.23	0.07	0.13	0.24	0.32	0.08	0.11	0.25	0.31	0.08	0.17	0.23	0.22	0.16	0.12	0.23	0.22	0.09	0.35	0.19	0.3	1.74	1.07	1.89	1.49	1.21	1.97	2.01	2.49	0.4	0.22	0.31	0.29	0.57	0.51	0.26	0.56	0.16
ENSMMUG00000002654	0.07	0.02	0.01	0.04	0.03	0.02	0.04	0.04	0.03	0.01	0.02	0.02	0	0.08	0	0.03	0	0	0	0.04	0	0.07	0	0.07	0.04	0.02	0	0	0	0.06	0	0.02	0.19	0.05	0.09	0.07	0.03	0.13	0.03	0.08	0.04	0.09	0.02	0.05	0.26	0.16	0.06	0.12	0.04
ENSMMUG00000002657	0.84	0.58	0.28	0.26	0.23	0.2	0.38	0.27	0.57	0.77	0.51	0.37	0.69	0.83	0.88	1.33	0.49	0.29	0.41	0.57	0.6	0.73	0.9	1.01	0.35	0.22	0.12	0.34	0.26	0.41	0.5	0.53	0.19	0.12	0.11	0.18	0.05	0.09	0.08	0.14	0.28	0.23	0.2	0.23	0.71	0.23	0.7	0.3	0.59
ENSMMUG00000002658	0.1	0.03	0.05	0.22	0.03	0.04	0.11	0.21	0.04	0.04	0.14	0.15	0.08	0.08	0.02	0.11	0.01	0.08	0.02	0.23	0.09	0.04	0.08	0.08	0.07	0.01	0.09	0.22	0.14	0.12	0.07	0.16	0.52	0.09	0.35	0.59	0.22	0.31	0.28	0.18	0.03	0.01	0.01	0.08	0.1	0.03	0.05	0.03	0.12
ENSMMUG00000002671	0.23	0.42	0.34	0.45	0.27	0.82	0.86	0.78	0.46	0.19	0.25	0.15	0.18	0.24	0.12	0.17	0.06	0.03	0.62	0.18	0.44	0.27	0.4	0.06	1.3	1.48	2.15	0.59	1.2	2.17	1.79	1.07	1.04	0.69	0.2	0.41	0.24	0.34	0.65	0.59	0.2	0.14	0.49	0.73	0.25	0.37	0.61	0.26	0.45
ENSMMUG00000002674	0.28	0.15	0.15	0.13	0.11	0.17	0.2	0.14	0.05	0.12	0.15	0.1	0.27	0.33	0.32	0.24	0.1	0.12	0.15	0.21	0.15	0.17	0.14	0.27	0.15	0.01	0.2	0.21	0.32	0.16	0.14	0.08	0.8	0.76	0.57	0.93	0.84	1.38	1.01	0.97	0.19	0.18	0.08	0.11	0.21	0.55	0.24	0.38	0.34
ENSMMUG00000002678	0.01	0.01	0.03	0.01	0.02	0.01	0.01	0.03	0.02	0.01	0.01	0	0	0	0.01	0	0.03	0.02	0.02	0.02	0	0.01	0	0.01	0.04	0.03	0.01	0.01	0.01	0	0.02	0.02	0.02	0.02	0.01	0.03	0.01	0.02	0.03	0.03	0.01	0.03	0.01	0.01	0	0.01	0.01	0.01	0
ENSMMUG00000002683	0.06	0.05	0.01	0.03	0	0	0.01	0.03	0	0.02	0	0	0.07	0	0	0	0.01	0	0.04	0.04	0.02	0.02	0.03	0.11	0.02	0	0.19	0.1	0.11	0.08	0	0.06	1.61	0.65	0.36	0.54	0.12	0.33	0.16	0.27	0	0.01	0.01	0	0.01	0.03	0	0	0.02
ENSMMUG00000002688	0.49	0.25	0.26	0.46	0.26	0.74	0.73	0.48	0.22	0.53	0.17	0.44	0.13	0.65	0.56	0.22	0.57	0.16	0.17	0.42	0.06	0.74	1.02	0.51	0.39	0.19	0.12	0.54	0.1	0.46	0.7	0.34	0.95	0.54	0.43	0.56	0.57	0.99	0.78	0.54	0.78	0.37	0.34	0.68	0.46	0.98	0.5	0.51	1.18
ENSMMUG00000002690	0.05	0.04	0.03	0.01	0.01	0.01	0	0	0.22	0.29	0.14	0.2	0.29	0.25	0.19	0.24	0.25	0.07	0.14	0.15	0.08	0.06	0.27	0.15	0.07	0.12	0.13	0.19	0.01	0.01	0.07	0.09	1.45	1.28	0.94	1.33	1.44	1.09	0.93	1.23	0.09	0.03	0	0.06	0.1	0.02	0.01	0.03	0.31
ENSMMUG00000002694	0	0.04	0	0	0	0.04	0	0	0.03	0	0	0	0	0	0	0	0	0	0	0	0	0	0	0	0	0	0	0	0	0	0	0	0	0.43	0	0.03	0	0	0	0	0	0	0.02	0	0	0	0	0	0.06
ENSMMUG00000002695	0.09	0.24	0.13	0.2	0.06	0.15	0.08	0.07	0.25	0.32	0.18	0.27	0.21	0.18	0.17	0.18	0.35	0.7	0.04	0.15	0.06	0.17	0.04	0.23	0.24	0.34	0.17	0.26	0.14	0.24	0.32	0.15	0.3	0.19	0.14	0.17	0.13	0.18	0.34	0.1	0.21	0.19	0.24	0.18	0.02	0.1	0.33	0.08	0.12
ENSMMUG00000002698	0.14	0.14	0.25	0.1	0.1	0.1	0.05	0.1	0.06	0.07	0.23	0.03	0.11	0.12	0.28	0.15	0.12	0.1	0.17	0.12	0.25	0.03	0.16	0.14	0.06	0.02	0.28	0.12	0.12	0.21	0.13	0.16	0.15	0.06	0.03	0.02	0.13	0.06	0.15	0.09	0.17	0.16	0.21	0.13	0.25	0	0.36	0.19	0.03
ENSMMUG00000002700	2.87	3.63	4.31	4.1	8.35	7.01	5.81	6.18	1.74	1.81	4.7	4.08	7.56	6.03	7.41	6.87	0.62	1.57	2.51	3.82	1.71	1.31	1.66	1.04	1.25	1.58	1.46	1.69	2.58	2.17	3.85	2.71	3.09	5.38	3.07	1.8	4.93	2.08	5.88	7.63	4.07	3.58	4.29	3.22	3.48	7.25	5.7	6.5	3.55
ENSMMUG00000002702	0.07	0.05	0.04	0.03	0.03	0.04	0.05	0.07	0.03	0.06	0.05	0.03	0.05	0.02	0.06	0.05	0.02	0.04	0.06	0.05	0.04	0.02	0.02	0.06	0.03	0.03	0.06	0.04	0.08	0.05	0.07	0.05	0.11	0.13	0.1	0.13	0.09	0.06	0.08	0.06	0.07	0.08	0.1	0.07	0.1	0.12	0.12	0.16	0.11
ENSMMUG00000002704	0	0	0	0	0.07	0.07	0	0	0.06	0	0	0	0	0	0.1	0	0	0	0	0.02	0	0	0	0.03	0	0	0	0	0.07	0	0	0	0	0	0	0	0	0	0	0	0	0.18	0	0	0	0	0	0	0
ENSMMUG00000002705	0.51	0.46	0.65	0.43	0.53	0.55	0.62	1.01	0.47	0.33	1.34	0.59	0.77	1.4	0.9	0.99	0.41	0.31	1.91	0.7	1.17	1.52	2.89	1.58	0.28	0.19	0.33	0.24	0.56	0.32	0.59	0.46	0.64	0.4	1.17	0.76	0.98	1.07	1.07	1.01	0.43	0.42	1.04	1.01	0.63	1.21	1	1.41	0.17
ENSMMUG00000002711	0.3	0.11	0.39	0.03	0.43	0.31	0.13	0.15	0.07	0.14	0.14	0.1	0.47	0.14	0.38	0.06	0.15	0.12	0.33	0.06	0.19	0.14	0.04	0.25	0.24	0.13	0.29	0.04	0.46	0.28	0.29	0.18	0.55	0.12	0.49	0.01	0.73	0.49	0.65	0.36	0.4	0.13	0.59	0.2	0.7	0.26	0.18	0.18	0.3
ENSMMUG00000002712	19.34	16.84	16.29	16.81	14.98	14.23	12.5	13.84	19.55	23.85	19.95	19.25	15.56	13.68	17.36	16.76	39.72	36.27	17.13	17.9	17.3	20.36	20.2	16.1	36.45	37.22	22.91	23.13	28.3	21.72	20.11	22.09	73.25	71	70.48	60.65	49.05	42.28	47.59	43.34	47.95	50.49	36.48	32.42	33.6	32.39	32.38	27.46	37.58
ENSMMUG00000002723	0.06	0.03	0	0.03	0	0.03	0.03	0	0	0.04	0	0	0.04	0.06	0	0.04	0	0.13	0.03	0.25	0	0	0.03	0	0	0	0.09	0.05	0.25	0	0.17	0.05	0	0.1	0.17	0.11	0.14	0.04	0.09	0.04	0.03	0.03	0	0.07	0	0	0	0	0.04
ENSMMUG00000002724	0.01	0	0.04	0.06	0.01	0.01	0	0	0	0.04	0.02	0.04	0.09	0.03	0.02	0.01	0.08	0.08	0.01	0	0.06	0.04	0	0.01	0.02	0	0	0.07	0	0	0	0.03	0.02	0.02	0.04	0.06	0	0.02	0.06	0.01	0.05	0.13	0.02	0.02	0.01	0	0.01	0.02	0.04
ENSMMUG00000002731	0.03	0	0	0.02	0.01	0	0	0	0	0	0	0	0	0	0	0	0	0	0.1	0	0	0	0	0	0	0	0	0	0.08	0	0	0.05	0	0.02	0	0.02	0.04	0.02	0	0.04	0	0.01	0.01	0	0.16	0.01	0	0	0
ENSMMUG00000002734	0.09	0.46	0.27	0.15	0.09	0.36	0.07	0.24	0.69	0.22	0.85	0.66	0.32	0.74	0.2	0.11	0.29	0.49	0.71	0.57	0.24	0.4	0	0.61	0.21	0.26	0.3	0.13	0.06	0.53	0.11	0.04	0.19	0.57	0.25	0.33	0.28	0.11	0.41	0.14	0.44	0.65	0.47	0.54	0.46	0.78	0.46	0.39	0.37
ENSMMUG00000002735	0.03	0.14	0.09	0.07	0.12	0	0.05	0.1	0.1	0.1	0	0.09	0	0	0.11	0.08	0.02	0.07	0.1	0.46	0.03	0.11	0	0.11	0.06	0.07	0.04	0.13	0	0.05	0.05	0	0.27	0.32	0.15	0.07	0.04	0.1	0.21	0.12	0.07	0.23	0.02	0.26	0	0.03	0.33	0.06	0.12
ENSMMUG00000002737	1.8	1.23	2.59	1.74	0.93	0.98	1.29	1.57	1.08	2.41	4.13	3.04	3.27	2.57	2.61	3.42	1.44	1	2.84	2.91	1.15	1.25	0.85	1.03	2.03	1.42	3.03	2.18	1.36	1.28	2.08	2.38	3.38	3.91	4.67	2.79	3.5	1.76	2.49	3.3	1.5	1.05	2.53	1.31	1.56	2.25	1.39	1.8	1.51
ENSMMUG00000002741	0.4	0.42	0.33	0.48	0.64	0.79	0.42	0.59	0.26	0.22	0.17	0.2	0.16	0.23	0.18	0.28	0.26	0.2	0.22	0.17	0.13	0.21	0.17	0.17	0.29	0.26	0.26	0.31	0.23	0.31	0.24	0.24	11.23	10.77	12.02	10.02	10.68	9.47	10.89	9.96	11.55	15.03	10.91	10.16	8.4	12.13	8.88	10.66	5.15
ENSMMUG00000002745	0.02	0.04	0.02	0	0.01	0.03	0.08	0.02	0.05	0	0	0.01	0.01	0	0	0.04	0	0.02	0.04	0.01	0	0.01	0	0	0.01	0.01	0.04	0.01	0	0	0	0.05	0.11	0.04	0.03	0.04	0.07	0	0.03	0.04	0	0.02	0	0	0.1	0.05	0.06	0.04	0.03
ENSMMUG00000002746	0.02	0	0	0.02	0	0.03	0.02	0	0	0	0	0	0.05	0.04	0.09	0.02	0	0	0.03	0.26	0	0.24	0	0.05	0	0.02	0	0.06	0.1	0	0	0.07	0.14	0.02	0.12	0.07	0.09	0.02	0.08	0.05	0	0	0.03	0	0	0	0	0	0
ENSMMUG00000002748	0	0.15	0.03	0	0.12	0	0.1	0.07	0.07	0.02	0	0	0	0	0	0.05	0	0.05	0.05	0.05	0.06	0	0.02	0.04	0.05	0.05	0.15	0.34	0.03	0.03	0	0.07	0.06	0.02	0.14	0.05	0	0.05	0.03	0.08	0.07	0	0.04	0.02	0.07	0.02	0.04	0.02	0
ENSMMUG00000002750	0.91	1.12	0.95	1.05	0.6	0.45	0.6	1.14	0.8	1.59	0.66	1.12	1.22	1.53	1.26	1.78	1.66	2.13	1.01	2.45	1.72	1.34	2.01	1.33	1.43	1.51	0.68	1.39	1.12	0.85	1.2	1.8	0.94	0.81	0.41	0.88	0.64	0.46	0.64	0.83	2.15	1.36	0.87	0.76	1.45	1.26	1.57	1.78	2.77
ENSMMUG00000002751	0.49	0.32	0.58	0.25	0.26	0.11	0.2	0.25	1.87	2.08	2.96	1.89	3.83	2.57	2.7	2.54	3.81	2.72	1.51	2.33	3.8	2.87	2.26	2.83	1.93	1.73	0.78	0.49	0.48	0.55	0.85	0.65	0.38	0.2	0.55	0.26	0.25	0.39	0.39	0.89	8.2	7.63	4.93	5.35	10.24	6.26	4.85	6.04	4.96
ENSMMUG00000002752	0.91	0.83	1.34	1.11	1.07	0.82	0.77	0.7	0.82	1.3	0.71	0.75	0.71	0.5	0.39	0.27	1.24	1.23	0.61	0.62	0.37	0.5	0.55	0.43	1.25	0.94	0.81	1.4	1.01	0.65	0.86	0.8	0.14	0.08	0.38	0.07	0.01	0.19	0.24	0.14	1.97	2.19	1.36	1.42	1	1.85	1.49	1.07	2.46
ENSMMUG00000002753	0.64	0.85	0.79	0.42	0.53	0.49	0.44	0.47	0.78	0.8	0.8	0.96	0.61	0.5	0.76	0.63	0.55	0.65	0.68	0.83	0.67	0.61	0.53	0.41	0.8	0.82	0.72	0.6	0.86	0.56	0.63	0.6	3.25	3.25	4.05	3.24	2.69	2.49	2.99	2.14	10.54	13.18	7.91	7.9	8.37	9.01	8.15	6.36	10.89
ENSMMUG00000002760	0	0	0	0	0	0	0	0	0	0	0	0	0	0	0	0	0	0	0	0	0	0	0	0	0	0	0	0	0	0	0	0	0.08	0.11	0.19	0.44	0.13	0.02	0.25	0.24	0	0.03	0.11	0.09	0.04	0.14	0.02	0	0.04
ENSMMUG00000002764	0.24	0.21	0.22	0.07	0.04	0.03	0.07	0.11	0.12	0.29	0.31	0.2	0.56	0.04	0.31	0.55	0.12	0.08	0.73	0.22	0.37	0.14	0.28	0.06	0.13	0.03	0.26	0.06	0.09	0.1	0.07	0.05	0.12	0.04	0.27	0.21	0.15	0.05	0.11	0.08	0.45	0.06	0.14	0.05	0.1	0.06	0.05	0.05	0.22
ENSMMUG00000002766	0.19	0.25	0.38	0.12	0.15	0.23	0.22	0.16	0.17	0.19	0.28	0.36	0.29	0.47	0.19	0.24	0.15	0.16	0.34	0.15	0.24	0.18	0.16	0.22	0.26	0.16	0.62	0.44	0.42	0.75	0.17	0.24	0.52	0.47	1.31	0.47	0.41	0.27	0.46	0.42	0.21	0.23	0.6	0.36	0.17	0.21	0.19	0.42	0.29
ENSMMUG00000002768	58.1	64.23	64.49	56.21	44.98	50.9	24.39	32.59	54.81	69.68	51.72	54.43	33.32	32.1	23.03	24.37	78.99	53.6	39.5	43.16	32.73	29.37	28.07	34.55	85.06	74.53	37.64	41.87	24.5	23.42	20.95	17.6	682.67	543.76	297.43	431.03	307.26	357.41	260.67	281.29	286.56	266.55	123.4	165.72	75.61	107.03	110.22	98.62	112.01
ENSMMUG00000002770	1.02	1.08	1.18	0.7	0.35	0.45	0.4	0.58	0.81	1.09	2.12	1.61	1.23	1.85	1.78	2.37	0.62	1.01	2.74	1.94	1.21	1.67	0.65	0.88	0.71	1.72	2.22	1.15	1.22	2.27	0.65	0.92	2.35	2.27	2.33	1.91	2.03	1.44	2.41	1.86	0.99	1.08	1.56	0.49	1.42	1.93	0.87	1.69	0.88
ENSMMUG00000002774	0	0.01	0.11	0.06	0.01	0	0.09	0.03	0.05	0.02	0.03	0	0.02	0.02	0.08	0	0	0	0.03	0.08	0.02	0.01	0	0.01	0.07	0	0.04	0	0	0.03	0.05	0	0.12	0.05	0.11	0.11	0	0.14	0.06	0.07	0.05	0	0.05	0.02	0.11	0.02	0.07	0	0.06
ENSMMUG00000002778	0.34	0.24	0.48	0.22	0.07	0.08	0.15	0.1	0.12	0	0.42	0.34	0.19	0.33	0.63	0.38	0.37	0.15	0.15	0.04	0.3	0.1	0.07	0.17	0.25	0.51	0.84	0.2	0.27	0.75	0.68	0.62	0.38	0.07	0.07	0	0	0.18	1.11	0.34	0.15	0.19	0.12	0.5	0	0.29	0.34	0.14	0.19
ENSMMUG00000002781	0.07	0.04	0.13	0.05	0.06	0.08	0.06	0.03	0.24	0.18	0.28	0.1	0.16	0.12	0.12	0.09	0.1	0.14	0.17	0.08	0.09	0.09	0.02	0.18	0.09	0.06	0.06	0.09	0.07	0.06	0.1	0.05	0.09	0.26	0.2	0.15	0.11	0.18	0.15	0.15	0.17	0.4	0.29	0.28	0.29	0.14	0.21	0.31	0.69
ENSMMUG00000002782	0.03	0.08	0.04	0.08	0.06	0.02	0.04	0.06	0.07	0.01	0.05	0.06	0.02	0.01	0.04	0.03	0.05	0.11	0.08	0.11	0.09	0.02	0.1	0.12	0.06	0.15	0.07	0.04	0.11	0.06	0.14	0.13	0.07	0.1	0.17	0.17	0.1	0.02	0.11	0.14	0.02	0.03	0.01	0.08	0.2	0.02	0.12	0.02	0.05
ENSMMUG00000002783	0.15	0.06	0.54	0.06	0.05	0.05	0.08	0.08	0.99	0.54	0.75	0.86	0.8	1.34	0.58	1.06	0.7	0.55	0.53	0.25	0.52	0.56	0.48	1.18	0.91	0.45	0.49	0.52	0.36	0.67	0.14	0.25	0.79	0.41	0.44	0.47	0.94	0.72	0.93	0.63	0.33	0.49	0.54	0.69	0.33	0.5	0.11	0.8	0.76
ENSMMUG00000002785	0.14	0.06	0.21	0.07	0.03	0.08	0.04	0.05	0.24	0.23	0.11	0.08	0.1	0.1	0.11	0.08	0.19	0.11	0.06	0.16	0.01	0.08	0.16	0.07	0.15	0.1	0.13	0.16	0.08	0.06	0.08	0.07	2.65	1.87	3.11	3.12	2.01	3.55	4.79	3.02	3.11	2.47	1.8	1.62	1.54	1.71	1.85	1.85	2.22
ENSMMUG00000002788	0.1	0.08	0.04	0.04	0.04	0.05	0.54	0.08	0.07	0.09	0.04	0.05	0.08	0.03	0.49	0.05	0.06	0.05	0.04	0.03	0.06	0.03	0.18	0.11	0.06	0.06	0.02	0.08	0.05	0.05	0.89	0.06	0.06	0.06	0.04	0.09	0.06	0.09	0.99	0.07	0.08	0.11	0.08	0.07	0.07	0.08	1.6	0.07	0.08
ENSMMUG00000002802	1.19	1.17	1.9	2.52	2.29	1.38	0.77	1.09	1.24	1.16	1.57	1.79	1.64	0.91	0.84	1.11	0.77	0.77	0.57	1.18	1.16	0.73	1.47	0.43	0.73	0.44	1.31	0.99	0.85	0.72	0.54	1.14	0.34	0.07	0.57	0.42	0.41	0.6	0.31	0.37	1.43	1.72	0.82	0.72	1.1	0.65	0.88	1.76	2.01
ENSMMUG00000002811	2.8	2.53	3.69	2.82	2.92	3.91	2.97	3.31	4.14	3.35	3.61	2.68	2.67	3.28	2.91	2.73	2.28	2.99	3.07	3.12	2.02	2.23	2.55	1.84	2.01	2.12	2.4	2.65	2.03	2.29	2.41	2.54	6.32	3.81	6.35	15.61	4.3	5.52	10.44	9.93	13.15	23.97	17.81	16.36	12.69	20.55	12.91	19.89	14.19
ENSMMUG00000002822	0.07	0.02	0.05	0.04	0.02	0.05	0.04	0.08	0.03	0.02	0.11	0.07	0.02	0.05	0.03	0.09	0.03	0.01	0.05	0.05	0.02	0.05	0.01	0.07	0.06	0.08	0.11	0.06	0.11	0.1	0.05	0.16	0.14	0.16	0.17	0.22	0.11	0.36	0.29	0.52	0.07	0	0.07	0.07	0.02	0.03	0.05	0.08	0.02
ENSMMUG00000002828	0.01	0	0.01	0.04	0.01	0.01	0.03	0.02	0.02	0.04	0.03	0.01	0	0.05	0	0.01	0	0.02	0.01	0.02	0.01	0.12	0	0.05	0.01	0	0	0.01	0.02	0.08	0	0.01	0.01	0.03	0.01	0.03	0.05	0.01	0	0.02	0.02	0.01	0.03	0.01	0.08	0	0.08	0.08	0.01
ENSMMUG00000002832	0.09	0.01	0.03	0.01	0.03	0.02	0.01	0.03	0.03	0.02	0	0.07	0	0.04	0.04	0	0	0.06	0.02	0.02	0.01	0.01	0.08	0.03	0.01	0.1	0.01	0	0	0.05	0.1	0	146.06	119.35	116.57	132.08	142.43	110.23	113.79	137.32	0.01	0.03	0.01	0.04	0.05	0.01	0.09	0.06	0.02
ENSMMUG00000002834	0.03	0.04	0.09	0.07	0.06	0.07	0.08	0.11	0.11	0.19	0.23	0.24	0.26	0.31	0.24	0.44	0.03	0.04	0.21	0.21	0.29	0.37	0.13	0.14	0.14	0.08	0.08	0.07	0.1	0.12	0.2	0.13	0.22	0.22	0.15	0.3	0.22	0.18	0.17	0.29	0.22	0.18	0.19	0.17	0.26	0.3	0.32	0.26	0.23
ENSMMUG00000002846	0	0	0	0	0	0	0	0	0	0	0	0	0	0	0	0	0	0	0	0	0	0	0	0	0	0	0	0	0	0	0	0	0.42	0.94	0.43	0.95	0.43	0.85	0.89	0.77	0.16	0.35	0.14	0.19	0.09	0.06	0.11	0.16	0.39
ENSMMUG00000002849	0.66	0.72	0.58	0.46	0.62	0.47	0.67	0.56	0.6	0.97	1.27	1.01	1.33	1.67	1.34	1.5	0.77	0.47	0.79	1.08	1.24	0.98	1.56	0.86	0.81	0.46	0.59	0.76	0.96	0.94	1.13	0.66	1.57	1.2	0.98	1.87	1.16	2.09	1.79	1.24	1.48	0.89	1.03	1.36	1.6	1.7	1.33	1.47	0.91
ENSMMUG00000002850	0.64	0.7	0.72	1.06	0.76	0.9	0.97	1.1	0.67	0.47	0.94	0.97	0.87	0.85	0.93	0.93	0.52	0.42	0.8	1.35	1.03	1.26	1.13	0.76	0.51	0.37	0.92	0.83	0.58	1.45	0.91	0.99	1.05	0.49	0.61	1.44	0.78	1.28	1.1	0.83	0.68	0.89	1.6	2.23	1.13	1.77	1.89	1.62	0.8
ENSMMUG00000002853	0.61	0.49	0.85	0.38	0.19	0.3	0.35	0.22	1.52	0.94	1.61	1.5	0.86	1.03	1.23	1.09	1.02	1.05	1.18	0.79	0.91	1	1.13	1.03	1.08	1.04	0.81	0.54	0.44	0.64	0.49	0.78	9.4	9.63	14.48	12.11	17.6	19.05	16.96	17.1	2.65	2.01	3.56	2.81	3.02	3.07	3.24	2.25	1.66
ENSMMUG00000002854	8.88	8.45	7.05	7.77	7.51	8.28	6.52	8.27	9.89	8.28	9.73	8.21	10.24	8.09	8.59	8.2	7.66	7.37	7.34	8.96	7.48	6.37	9.05	7.56	6.37	6	5.95	5.47	6.66	6.03	6.81	6.46	2.58	3.2	1.1	0.94	1.45	2.21	1.97	1.6	14.42	17.34	14.19	13.33	12.94	11.01	14.36	15.95	14.58
ENSMMUG00000002857	0	0	0	0	0.03	0.02	0	0.06	0.01	0	0	0	0	0.04	0.03	0	0	0	0	0	0	0	0	0.03	0.01	0.01	0	0	0	0	0	0	1.17	0.45	1.01	0.97	0.76	0.63	1.11	1.02	0.64	0.82	0.46	0.43	1.17	1.31	0.77	0.77	0.58
ENSMMUG00000002861	0.14	0.14	0.08	0.06	0.05	0.08	0.14	0.09	0.1	0.29	0.23	0.39	0.3	0.29	0.26	0.24	0.17	0.12	0.15	0.35	0.27	0.18	0.06	0.05	0.19	0.15	0.09	0.13	0.04	0.08	0.1	0.06	0.18	0.27	0.14	0.33	0.2	0.15	0.22	0.21	0.44	0.36	0.13	0.08	0.23	0.44	0.14	0.16	0.19
ENSMMUG00000002862	0.02	0.09	0.01	0.03	0.07	0.03	0.05	0.04	0.01	0.03	0.02	0.01	0.01	0	0	0	0	0.02	0	0.02	0	0.01	0	0	0	0.01	0.02	0.02	0.04	0	0.08	0	0.03	0.02	0.03	0.02	0.02	0.03	0.02	0.01	0	0	0.01	0.02	0.01	0	0	0.01	0
ENSMMUG00000002865	0.16	0.25	0.15	0.1	0.08	0.13	0.12	0.15	0.4	0.5	0.39	0.42	0.54	0.55	0.34	0.55	0.4	0.58	0.31	0.41	0.51	0.46	0.15	0.33	0.44	0.35	1.68	1.11	0.92	0.63	0.53	0.42	0.72	0.45	0.86	0.65	0.25	0.25	0.26	0.39	2.51	3.17	1.07	1.06	0.98	1.55	0.96	1.28	0.54
ENSMMUG00000002867	0.01	0.01	0	0	0.01	0.02	0	0	0.04	0.06	0.1	0.02	0.15	0.11	0.08	0.05	0.12	0.08	0.01	0.03	0.15	0.11	0.23	0.14	0	0.01	0.03	0.01	0.04	0	0	0	0.06	0.06	0.06	0.01	0.02	0.02	0.01	0.02	0.02	0.01	0.02	0.05	0.02	0.02	0.01	0.03	0.02
ENSMMUG00000002869	0.03	0.02	0.01	0.03	0.02	0.05	0.03	0.05	0.06	0.16	0.2	0.09	0.27	0.22	0.26	0.4	0.04	0.03	0.11	0.17	0.03	0.15	0	0.03	0.01	0.04	0.11	0.06	0.06	0.1	0.04	0	4.38	4.51	5.13	5.25	4.58	4.74	4.97	4.66	0.06	0.01	0.02	0.05	0.13	0.06	0.02	0.02	0.01
ENSMMUG00000002871	0.09	0.04	0.04	0.09	0.06	0.09	0.07	0.08	0.11	0.06	0.03	0.04	0.03	0.04	0.01	0.05	0.06	0.07	0.07	0.04	0.04	0.04	0.03	0.05	0.09	0.07	0.08	0.04	0.05	0.05	0.07	0.05	0.1	0.11	0.1	0.06	0.04	0.06	0.01	0.04	0.08	0.08	0.03	0.04	0.02	0.06	0.05	0.05	0.09
ENSMMUG00000002873	3.25	2.92	0.82	2.16	1.47	1.42	3.59	3.16	1.41	1.76	5.23	3.81	5.27	6.19	5.5	3.73	0.89	1.55	2.2	3.51	1.09	1.48	0.46	0.36	0.27	0.3	0.48	0.68	0.65	0.73	1.52	0.69	5.3	4.8	2.7	2.84	2.58	2.63	2.59	3.14	1.29	1.56	2.21	0.81	3.01	5.05	1.94	3.16	1.59
ENSMMUG00000002875	5.24	5.82	6.03	5.87	5.68	5.91	3.76	4.99	5.88	7.68	6.17	7.04	5.22	5.29	5.1	5.11	3.93	3.76	4.03	6.44	3.59	3.54	2.7	3.19	2.73	3.03	2.55	2.75	3.26	3.01	3.12	2.69	559.62	607.43	575.12	640.63	414.62	453.47	478.15	343.3	391.14	458.46	259.61	282.07	225.22	327.74	211.14	219.3	236.54
ENSMMUG00000002876	1.94	1.97	1.43	1.69	1.97	1.9	2.01	1.76	0.33	0.19	0.2	0.13	0.2	0.24	0.72	0.34	0.2	0.15	0.28	0.08	0.25	0.16	0.81	0.25	0.74	1.15	2.24	1.18	1.8	1.32	1.95	1.25	0.47	0.27	0.28	0.22	0.36	0.23	0.3	0.35	0.08	0.16	0.2	0.09	0.21	0.22	0.27	0.28	0.19
ENSMMUG00000002877	0.32	0.19	0.17	0.16	0.25	0.3	0.39	0.12	0.09	0.09	0.06	0.03	0.14	0.07	0.1	0.01	0.04	0.08	0.01	0.12	0.01	0.02	0.04	0.05	0.09	0.05	0.15	0.15	0.1	0.23	0.12	0.15	0.05	0.06	0.03	0.02	0.04	0.05	0.07	0.09	0.15	0.16	0.08	0.09	0.09	0.04	0.12	0.06	0.08
ENSMMUG00000002883	0.09	0.34	0.22	0.05	0.08	0.11	0.11	0.1	0.05	0.05	0.02	0.04	0.05	0.04	0.04	0.08	0.05	0.07	0.06	0.13	0.11	0.12	0.03	0.04	0.22	0.22	0.21	0.17	0.77	0.31	0.1	0.49	2.02	2.42	2.39	4.09	1.56	2.35	2.68	1.38	0.73	1.11	1.58	1.43	1.58	1.56	2.36	1.97	0.74
ENSMMUG00000002890	0	0	0.01	0.02	0.01	0.03	0.01	0	0.01	0	0	0	0.03	0.02	0	0.02	0	0	0.02	0	0.01	0.01	0	0.01	0	0.01	0	0	0	0	0	0.07	0.02	0.02	0.02	0.01	0	0.01	0.02	0.02	0.01	0.01	0	0.01	0.01	0	0	0	0.01
ENSMMUG00000002896	0	0.05	0.02	0.11	0.06	0.11	0.13	0.21	0.02	0.07	0.15	0.09	0.11	0.49	0.21	0.09	0.18	0.07	0.1	0.05	0.18	0.2	0.18	0.1	0.02	0.04	0.03	0	0.06	0.29	0.17	0	0	0	0	0	0	0.01	0.01	0	0.3	0.35	0.26	0.34	0.28	0.43	0.33	0.33	0.02
ENSMMUG00000002904	0.27	0.33	0.85	0.44	0.64	0.57	0.46	0.44	0.11	0.22	0.37	0.21	0.28	0.34	0.22	0.27	0.05	0.15	0.13	0.34	0.27	0.08	0.14	0.04	0.09	0.08	0.75	0.25	0.63	0.45	0.31	0.47	0.11	0.1	0.3	0.09	0.34	0.21	0.18	0.06	0.48	0.36	0.26	0.07	0.33	0.05	0.14	0.23	0.39
ENSMMUG00000002909	0.54	0.51	0.46	0.51	0.36	0.24	0.25	0.63	0.5	0.56	1.49	1.2	1.82	1.67	2	1.58	0.47	0.43	1.07	1.37	0.78	0.51	0.72	0.88	0.68	0.37	0.58	1.01	0.87	1.29	1.34	1.65	0.77	1.04	0.65	0.9	1.57	0.76	1.19	1.19	0.53	0.43	0.66	0.53	0.61	0.9	0.96	0.79	0.53
ENSMMUG00000002912	0	0	0	0	0	0	0	0	0	0	0	0	0	0	0	0	0	0	0	0	0	0	0	0	0	0	0	0	0	0	0	0	0.11	0.04	0.06	0.16	0.04	0.01	0.12	0.08	0.05	0.06	0	0	0.02	0.04	0.01	0.02	0.03
ENSMMUG00000002917	0.34	0.12	0.51	0.29	0.27	0.36	0.32	0.43	0.34	0.4	0.42	0.3	0.68	0.57	0.46	0.73	0.26	0.42	0.37	0.26	0.52	0.44	0.68	0.56	0.23	0.27	0.45	0.12	0.41	0.82	0.52	0.74	0.26	0.3	0.57	0.29	0.33	0.29	0.32	0.35	0.44	0.51	0.55	0.35	0.61	0.38	0.43	0.61	0.76
ENSMMUG00000002920	0.05	0	0.1	0.01	0.05	0.03	0.09	0.05	0.02	0	0.14	0.09	0.08	0.06	0.04	0.08	0.08	0.14	0.03	0.08	0.11	0	0.02	0.08	0.05	0.03	0.02	0.16	0	0.09	0.08	0	0.21	0.06	0.26	0.16	0.06	0.19	0.2	0.04	0.03	0.04	0	0.07	0.04	0.07	0.03	0.05	0.06
ENSMMUG00000002923	0	0.02	0.04	0.01	0.02	0.02	0.02	0.01	0.02	0	0	0.02	0.02	0	0.01	0	0.01	0	0.12	0.01	0.05	0	0.01	0	0.02	0.02	0.05	0.11	0	0.01	0.01	0	0.02	0.04	0.07	0.01	0.01	0.01	0.01	0.03	0	0.03	0.01	0	0.02	0.03	0.04	0.02	0
ENSMMUG00000002927	0	0.01	0	0	0.02	0	0.01	0.01	0.01	0	0	0	0	0.02	0	0	0	0	0	0	0	0	0.04	0	0	0.01	0	0.01	0.01	0.01	0	0	0.11	0.02	0.01	0	0	0.02	0.01	0.01	0	0.01	0	0.07	0.09	0	0	0	0.01
ENSMMUG00000002932	0.14	0.06	0.11	0.08	0.07	0.03	0	0.06	0.11	0.04	0.27	0.28	0.29	0.39	0.27	0.64	0.27	0	0.1	0.12	0.23	0.17	0.38	0.67	0.06	0.16	0.07	0.16	0.11	0.25	0.43	0.42	0.35	0.08	0.06	0.06	0.37	0.3	0	0.19	0.06	0.02	0.15	0.18	0.35	0.06	0.42	0.61	0.15
ENSMMUG00000002935	0.22	0.21	0.78	0.61	0.25	0.29	0.41	0.38	0.6	0.45	1.47	0.9	0.61	0.76	1	0.92	0.63	0.82	1.29	0.81	0.41	1	0.87	0.8	0.92	1.05	0.92	0.65	0.42	0.56	0.63	0.43	0.35	0.54	1.14	0.91	0.27	0.43	0.63	0.6	1.86	2.88	2.66	2.56	0.65	1.91	2.18	1.4	1.7
ENSMMUG00000002946	0	0.06	0	0.01	0	0.03	0	0	0.02	0	0	0	0.01	0.02	0	0	0	0	0	0	0	0	0.01	0	0	0.02	0.07	0	0.03	0.03	0	0	0.3	0.48	0.31	0.33	0.57	0.31	0.37	0.38	0.32	0.19	0.17	0.34	0.05	0.11	0.21	0.23	0.19
ENSMMUG00000002947	0.49	0.35	0.37	0.39	0.42	0.36	0.76	0.34	1.37	1.89	4.47	2.29	5.03	3.77	3.24	4.36	1.06	1.03	1.96	2.48	1.81	2.63	1.65	0.42	0.6	0.92	0.66	0.38	0.7	0.82	0.7	0.45	1.74	1.37	1.47	2.43	2.41	1.33	1.85	1.64	2.8	1.7	1.95	1.37	3.91	3.16	1.94	2.35	2.53
ENSMMUG00000002950	1.6	1.42	1.5	0.78	0.8	0.79	0.6	0.93	1.56	2.09	1.82	2.83	1.79	3.32	1.94	1.79	1.7	1.5	2.71	2.86	1.4	2.45	1.92	1.59	1.96	1.62	0.79	0.8	0.95	1.62	1.15	0.89	0.51	0.88	0.61	0.71	0.47	0.84	0.63	0.66	3.12	4.23	1.91	4.01	4.11	3.56	1.59	3.09	2.99
ENSMMUG00000002951	0.13	0.11	0.02	0.05	0.02	0.03	0.05	0.05	0	0	0	0.04	0	0	0	0	0	0	0	0.01	0.04	0	0	0	0.22	0.18	0.21	0.04	0.16	0.14	0.08	0.3	0.33	0.15	0.18	0.14	0.15	0.21	0.16	0.13	0.01	0	0.03	0.1	0.09	0.01	0.23	0.06	0.01
ENSMMUG00000002954	0.04	0.03	0	0.01	0.02	0.01	0.02	0.01	0.02	0.02	0.02	0.01	0.01	0.01	0	0.02	0.01	0.05	0.01	0	0.01	0.02	0	0	0.01	0.03	0.02	0.03	0.01	0	0	0	0.08	0.1	0.16	0.06	0.08	0.07	0.03	0.08	0.01	0.03	0.05	0.03	0.05	0.02	0.03	0.01	0.04
ENSMMUG00000002956	1.48	1	1.05	1.09	0.43	1.17	0.85	1.27	0.88	1.66	0.54	1.13	0.85	1.14	0.85	1.68	1.43	1.02	0.95	1.03	0.57	0.95	0.77	0.93	1.97	1.41	1.26	0.96	0.88	1.31	0.78	1.96	1.24	0.99	0.96	0.5	1.01	0.94	0.83	1.41	1.5	1.28	1.32	0.7	0.92	1.19	1.12	1.67	2.75
ENSMMUG00000002957	3.12	3.23	3.17	2.65	1.58	2.02	1.3	1.67	3.53	6.59	4.36	6.9	3.18	3.2	2.38	2.86	7.29	7.25	3.75	3.42	3.85	3.13	2.92	3.68	5.86	5.87	3.1	3.85	4.75	3.72	2.73	3.94	13.07	16.79	12.02	11.84	13.02	14.89	10.83	11.14	11.4	10.96	9.19	10.42	8.9	6.33	4.6	8.61	10.96
ENSMMUG00000002958	0.04	0.08	0.05	0	0	0	0.04	0	0.02	0.04	0	0	0	0.03	0.23	0.04	0.19	0.19	0	0.09	0.03	0.04	0.13	0.01	0.05	0.05	0.07	0	0	0	0.11	0	0.05	0.09	0.02	0.05	0.02	0.03	0.18	0	0.08	0.22	0	0.11	0.2	0.04	0.2	0.01	0.04
ENSMMUG00000002966	0.13	0.1	0.19	0.11	1.88	0.03	0.13	0.14	0.06	0.03	0	0.02	1.78	0	0.11	0.07	0.05	0.17	0.02	0.02	0.86	0.05	0.11	0.07	0.06	0.09	0.19	0.02	1.24	0.06	0.05	0.21	0.04	0.04	0.15	0.05	0.74	0.21	0.07	0.23	0	0.01	0.06	0.1	1.72	0.05	0.03	0	0.01
ENSMMUG00000002967	15.73	19.21	32.62	16.4	11.37	11.55	29.52	22.46	2.87	2.41	8.54	6.18	8.35	13.11	8.56	7.5	7.87	7.67	17.87	9.72	14.41	19.04	26.92	21.96	50.43	52.86	104.84	76.19	61.45	121.75	64.12	84.31	11.6	9.77	11.45	13.14	14.9	16.42	16.28	16.37	9.61	9.84	21	32.76	18.43	19.3	37.75	25.81	3.72
ENSMMUG00000002969	0.05	0	0.01	0	0.02	0.01	0.01	0	0	0	0	0	0	0	0	0	0	0	0	0	0.01	0	0	0	0	0	0.02	0	0	0.02	0	0	0.07	0.31	0	0.04	0.02	0.06	0	0	0	0.01	0	0.02	0.01	0	0	0	0
ENSMMUG00000002971	0.38	0.1	0.16	0.08	0.12	0.07	0.19	0.06	0.16	0.16	0.13	0.12	0.13	0.12	0.2	0.14	0.18	0.3	0.08	0.11	0.06	0.24	0.15	0.19	0.24	0.33	0.07	0.08	0.14	0.36	0.22	0.18	0.3	0.17	0.17	0.18	0.2	0.21	0.17	0.16	0.63	0.42	0.52	0.06	0.27	0.41	0.49	0.11	0.5
ENSMMUG00000002974	0.05	0	0.13	0.03	0.01	0.04	0	0.02	0.07	0.09	0.05	0.02	0.06	0.02	0.12	0.09	0.03	0.07	0.02	0.26	0	0.17	0.1	0.02	0	0.05	0.03	0.13	0	0.03	0.08	0.04	0.1	0.05	0.05	0.03	0.05	0.06	0.06	0.03	0.1	0	0.13	0	0.08	0	0.06	0.06	0.03
ENSMMUG00000002977	0.01	0.03	0	0	0.01	0.01	0	0	0.02	0.02	0	0	0	0	0	0.02	0.03	0.01	0.01	0	0	0	0	0.02	0	0.02	0	0.02	0	0.03	0	0	0.05	0.17	0.16	0.06	0.05	0.17	0.09	0.31	0.35	0.04	0.19	0.1	0	0.18	0	0.1	0.17
ENSMMUG00000002997	0.33	0.33	0.09	0.29	0.31	0.31	0.33	0.18	0.72	0.76	0.3	0.28	0.56	0.21	0.21	0.22	0.39	0.47	0.22	0.22	0.46	0.26	0.31	0.22	0.34	0.43	0.3	0.18	0.3	0.34	0.52	0.26	0.83	0.62	0.26	0.63	0.49	0.98	0.53	0.31	0.61	0.43	0.42	0.29	0.6	0.73	0.63	0.21	0.6
ENSMMUG00000002998	0.02	0.03	0.06	0.03	0.02	0.01	0.01	0.01	0.03	0.08	0.05	0.01	0.02	0.08	0.05	0.07	0	0.02	0.03	0.04	0	0.03	0.15	0.02	0.01	0.06	0.01	0.01	0.01	0.03	0.05	0.04	0.1	0.11	0.05	0.14	0.11	0.15	0.12	0.22	0.01	0.03	0.04	0.05	0.03	0.02	0.05	0.08	0.09
ENSMMUG00000003004	0	0.09	0.12	0.16	0.03	0.24	0.03	0.1	0.43	0	0	0.06	0.11	0	0.1	0	0.07	0.07	0.17	0.09	0.11	0.04	0.1	0.18	0	0.27	0	0	0	0.31	0	0	0	0.12	0.43	0.47	0.06	0.05	0.11	0.26	0.2	0.03	0.03	0.03	0.14	0.65	0	0.24	0
ENSMMUG00000003005	1.13	0.82	1.41	0.66	0.46	0.44	0.75	0.58	0.54	1.02	0.98	0.85	0.95	0.98	0.88	1.19	1.46	0.95	1.49	1.3	0.74	1.72	1.2	0.77	1.02	0.98	1.59	1.19	1.45	1.49	1.43	1.05	0.97	1.12	1.28	1.69	0.97	1.05	0.91	0.8	1.15	1.05	1.7	0.81	1.15	0.96	1.2	0.91	1.23
ENSMMUG00000003009	0.27	0.19	0.4	0.51	0.22	0.26	0.15	0.32	0.36	0.49	0.09	0.04	0.25	0.22	0.22	0.12	0.13	0.03	0.26	0.26	0.03	0.33	0.37	0.2	0.1	0.2	0.56	0.13	0.24	0.66	0.11	0.1	0.23	0.5	0.46	0.51	0	0.08	0.21	0.32	0.1	0.2	0.23	0.21	0.05	0.03	0.31	0.25	0.21
ENSMMUG00000003011	0.01	0.01	0.02	0	0.01	0.01	0.01	0.01	0.02	0.12	0.04	0.01	0.06	0.01	0	0	0.02	0.03	0.03	0.03	0.02	0.02	0.01	0	0.02	0.04	0.01	0.03	0.01	0.02	0	0	0.04	0.03	0.06	0.02	0.05	0.05	0.07	0.04	0.05	0.02	0.02	0.01	0.05	0.01	0.05	0.02	0.19
ENSMMUG00000003014	10.03	13.14	21.1	11.03	14.42	13.72	7.23	9.54	7.76	17.39	16.4	11.14	19.4	22.91	10.88	16.37	17.57	9.82	12.41	11.98	16.96	19.99	8.88	8.91	12.38	14.79	29.74	18.27	55.63	66.54	21.45	38.85	6.74	8.47	6.8	6.41	6.62	3.53	5.23	6.21	13.01	8.42	10.37	7.27	11.42	15.67	5.23	10.79	18.56
ENSMMUG00000003021	0	0.02	0	0	0.02	0.05	0	0.01	0.02	0	0	0	0	0.02	0.01	0.01	0.01	0.01	0	0.01	0	0.02	0	0	0.03	0.03	0.02	0.01	0	0.05	0	0	0.04	0.02	0.09	0.03	0.04	0.1	0.03	0.03	0.04	0.05	0.02	0.01	0.02	0.03	0	0.01	0.04
ENSMMUG00000003022	0.02	0	0	0.01	0	0.01	0.03	0.01	0.11	0.04	0	0.01	0.03	0.01	0.01	0	0.04	0.01	0	0.01	0.01	0.02	0	0	0.03	0.03	0	0	0.01	0.01	0	0.01	0.03	0.01	0	0	0	0.01	0	0	0.01	0	0.05	0	0.01	0.03	0	0	0
ENSMMUG00000003024	0.17	0.06	0.09	0.05	0.09	0.1	0.1	0.1	0.07	0.21	0.22	0.25	0.13	0.14	0.13	0.3	0.18	0.22	0.34	0.24	0.56	0.29	0.22	0.25	0.18	0.16	0.11	0.06	0.09	0.26	0.07	0.1	0.18	0.18	0.28	0.17	0.21	0.07	0.1	0.43	0.41	0.12	0.23	0.1	0.19	0.48	0.15	0.19	0.4
ENSMMUG00000003027	0.11	0.1	0.1	0.03	0.12	0.03	0.15	0.08	0.2	0.29	0.17	0.24	0.15	0.17	0.26	0.2	0.17	0.35	0.3	0.12	0.15	0.17	0.21	0.65	0.24	0.17	0.09	0.08	0.01	0.03	0.11	0.09	0.05	0.03	0.03	0	0.02	0.07	0.03	0.04	0.49	0.61	0.19	0.28	0.23	0.33	0.56	0.25	0.35
ENSMMUG00000003028	0.06	0	0.01	0	0.02	0.02	0	0	0	0.04	0	0	0.02	0.02	0	0.01	0	0	0.01	0.03	0	0.01	0.01	0	0.01	0	0	0	0	0.02	0	0	0	0.03	0.04	0.08	0	0	0.02	0	0	0.02	0.02	0.05	0	0.04	0	0	0
ENSMMUG00000003030	0.47	0.46	0.49	0.37	0.24	0.2	0.25	0.21	0.21	0.47	0.26	0.38	0.27	0.13	0.18	0.32	0.4	0.41	0.19	0.28	0.23	0.13	0.27	0.17	0.6	0.32	0.54	0.42	0.63	0.93	0.54	0.68	0.33	0.28	0.28	0.28	0.39	0.33	0.36	0.26	0.53	0.38	0.23	0.32	0.28	0.17	0.36	0.17	0.65
ENSMMUG00000003031	0.02	0.03	0.1	0.03	0.05	0.05	0.02	0.05	0.08	0.03	0.04	0.06	0.15	0.09	0.08	0.07	0.11	0.08	0.03	0.04	0.04	0.11	0.1	0.06	0.03	0.1	0.08	0.06	0.05	0.02	0.03	0.03	0.3	0.14	0.06	0.08	0.09	0.1	0.09	0.07	0.07	0.07	0.05	0.14	0.08	0.02	0.12	0.08	0.03
ENSMMUG00000003033	0.01	0	0	0.03	0.05	0.03	0	0	0.01	0	0	0	0	0	0.02	0.03	0.01	0	0.03	0.05	0	0	0.04	0.03	0.02	0	0.08	0.01	0	0.02	0.02	0.07	0	0	0	0	0	0	0.03	0	0.05	0.02	0.01	0.01	0	0	0	0	0
ENSMMUG00000003041	1.12	1.06	0.93	1.89	1.42	1.98	1.05	1.64	0.89	0.77	0.55	0.6	0.47	0.47	0.32	0.42	0.6	0.85	0.44	0.58	0.52	0.45	0.36	0.51	0.42	0.42	0.5	0.65	0.73	0.53	0.74	0.57	0.23	0.16	0.08	0.12	0.07	0.13	0.06	0.1	0.96	1.04	0.76	0.91	0.62	1	0.59	0.85	0.97
ENSMMUG00000003049	0.02	0.09	0.05	0.08	0.05	0.01	0.01	0.07	0.01	0.01	0.02	0.01	0.01	0	0.02	0.01	0	0.01	0.01	0.02	0.01	0.03	0	0.02	0.08	0.05	0.14	0.11	0.16	0.15	0.04	0.24	0.07	0.01	0.02	0.02	0.03	0.05	0.04	0.04	0.03	0.02	0.01	0.01	0	0.03	0.01	0.04	0.06
ENSMMUG00000003052	0.09	0.15	0.15	0	0.08	0	0	0.13	0.26	1.25	1.12	1.36	1.33	0.36	1.58	1.01	1.03	0.16	0.08	0.08	0	0.18	0.87	0.09	0.85	0.76	0.14	0.14	0.06	0	0.17	0.08	0	0	0.05	0.12	0.07	0	0	0	0.25	0.2	0.17	0.22	0.13	0.18	0	0.12	1.93
ENSMMUG00000003061	10.43	10.55	8.51	9.14	9.56	9.34	7.87	8.79	5.52	6.49	4.51	5.02	3.92	3.42	4.33	4.28	4.77	6.15	2.69	4.1	3.72	2.98	3.03	2.64	4.85	6.94	8.43	7.45	7.96	8.33	6.48	8.19	9.23	7.91	9.3	6.71	8.23	7.28	6.64	5.95	2.65	3.47	1.72	1.86	2.32	2	2.16	1.66	3.21
ENSMMUG00000003062	0.22	0.22	0.39	0.1	0.07	0.12	0.12	0.15	2.46	1.77	2.42	1.9	2.3	1.97	2.03	1.98	1.39	1.24	1.58	1.35	1.52	1.67	2.75	1.82	1.02	1	0.71	0.21	0.06	0.26	0.41	0.11	8.95	9.33	9.02	10.5	8.05	8.95	8.91	9.48	33.77	30.22	24.28	25.03	23.36	34.06	25.26	26.73	15.14
ENSMMUG00000003066	4.32	3.45	5.09	4.55	3.44	3.94	2.98	4.39	2.01	2.77	3.45	2.51	2.47	2.51	3.22	2.87	2.41	2.43	3.11	3.17	2.57	2.3	2.56	2.65	2.91	3.31	7.41	5.26	5.59	5.08	4.58	8.43	1.19	1.22	0.97	1.52	1.3	1.25	1.5	1.88	1.28	0.99	2.77	3.05	2.25	1.79	1.85	2.41	2.31
ENSMMUG00000003069	0.76	0.68	0.94	0.71	0.96	1.08	0.71	0.48	0.84	0.77	0.53	0.86	0.87	0.73	0.72	0.91	0.63	0.61	0.34	0.9	0.75	0.86	0.5	0.32	0.91	0.43	0.59	0.49	0.54	1.05	0.64	0.79	3.2	3.59	2.76	3.3	2.56	3.57	2.51	2.27	1.56	1.74	1.3	1.92	1.33	0.89	1.62	1.51	1.5
ENSMMUG00000003071	0.03	0.01	0.02	0.02	0.01	0.01	0.01	0.02	0	0.03	0	0.01	0.04	0.01	0.01	0.03	0.03	0.01	0.02	0	0.02	0	0	0.01	0.02	0.02	0.04	0.02	0	0	0	0.01	0.13	0.14	0.1	0.07	0.18	0.11	0.27	0.21	0.13	0.11	0.12	0.08	0.15	0.33	0.15	0.25	0.13
ENSMMUG00000003072	0.01	0.02	0	0	0	0	0.01	0	0	0	0	0	0.01	0	0	0	0.01	0.01	0.01	0	0	0.02	0	0	0.01	0.01	0.01	0.01	0	0.02	0.01	0	0.02	0.02	0.01	0.01	0.02	0	0.01	0.01	0.01	0	0	0	0.01	0.01	0.01	0	0.01
ENSMMUG00000003079	0.01	0.01	0.07	0.01	0.05	0.12	0.01	0.04	0.02	0.01	0	0.02	0.05	0.01	0.03	0.02	0	0	0.01	0.02	0.02	0.01	0.02	0.03	0.1	0.01	0.01	0	0.08	0.12	0.1	0.09	0.08	0	0.13	0.02	0.06	0.04	0.14	0.03	0.07	0.01	0.1	0.03	0	0.17	0.05	0.05	0.11
ENSMMUG00000003082	14.39	9.3	1.04	3.05	1.73	1.54	2.14	2.58	0.1	0	0.03	0	0	0	0.16	0.06	0.14	0	0.04	0.02	0	0	0.04	0	0.15	0.1	0.74	0.1	0.89	0.14	0.72	1.17	0.44	0.58	0.22	0.14	0.27	0.12	0.51	0.34	0.04	0.04	0	0	0	0	0	0.05	0.1
ENSMMUG00000003083	9.34	10.57	7.61	6.68	4.73	4.64	5.55	4.57	9.3	13.79	7.16	11.83	9.14	12.45	13.05	8.45	15.09	12.49	9.22	11.89	8.15	8.67	11.28	7.91	11.55	12.49	9.1	10.55	7.37	14.52	10.5	9.29	21.43	24.17	14.07	15.05	12.84	18.99	14.32	16.94	16.64	14.58	7.32	7.87	8.09	8.22	12.5	8.31	18.68
ENSMMUG00000003087	0.34	0.73	1.15	0.5	1.43	1.52	0.81	0.58	0.02	0.03	0.18	0.03	0	0.04	0.31	0.09	0.04	0.03	0.01	0.02	0.06	0.1	0.02	0	0.25	0.1	0.39	0.35	0.65	0.32	0.33	0.29	3.02	2.25	2.27	1.16	0.74	0.35	0.37	1.16	0.09	0.02	0.02	0.11	0.04	0.05	0.35	0.12	0.07
ENSMMUG00000003088	0.03	0.14	0.09	0.02	0	0.03	0.1	0.08	0.17	0.09	0.15	0.06	0	0.07	0.07	0.27	0	0.16	0.26	0.03	0.05	0.05	0.36	0.62	0	0.32	0.27	0.11	0.25	0	0.07	0.2	0	0.33	0.06	0.23	0	0.03	0.16	0.21	0.21	0.13	0.02	0	0	0.21	0.24	0.14	0
ENSMMUG00000003100	0.03	0.02	0.15	0.05	0.05	0.03	0.06	0.04	0.11	0.07	0.05	0.08	0.07	0.07	0.11	0.14	0.05	0.03	0.15	0.06	0.08	0.03	0.08	0.18	0.11	0.08	0.12	0.04	0.13	0.07	0.09	0.06	0.07	0.14	0.11	0.06	0.09	0.07	0.12	0.12	0.05	0.14	0.22	0.16	0.25	0.03	0.06	0.32	0.08
ENSMMUG00000003108	0.04	0	0.01	0.04	0.08	0.12	0.47	0.02	0	0.01	0	0.17	0	0.06	0.15	0.01	0.04	0	0.01	0.06	0.11	0.01	0.47	0.01	0.03	0	0.03	0.03	0	0.02	0.04	0.06	0.02	0.02	0.04	0.01	0.05	0	0.02	0.11	0	0	0	0	0.02	0	0.02	0	0.08
ENSMMUG00000003109	0.03	0	0.01	0	0	0.01	0	0	0.02	0.02	0	0	0	0	0	0	0	0.04	0	0	0	0.13	0.01	0.01	0.02	0	0	0	0	0.02	0	0	0.02	0.06	0.02	0.04	0.02	0	0.04	0.04	0	0	0	0	0	0.03	0	0	0.03
ENSMMUG00000003113	0.18	0.48	0.23	0.35	0.46	0.68	0.55	0.4	0.44	0.34	0.22	0.3	0.46	0.5	0.47	0.46	0.23	0.36	0.34	0.25	0.16	0.4	0.16	0.42	0.23	0.43	0.39	0.34	0.21	0.26	0.34	0.33	3.59	3.8	3.71	4.09	3.61	3.86	4.1	4.54	1.46	1.84	1.54	1.24	1.22	2.13	1.4	1.7	0.78
ENSMMUG00000003115	0	0	0.01	0	0.01	0.01	0.01	0.01	0.01	0	0.01	0	0	0.01	0.01	0	0.01	0	0.04	0.01	0	0.01	0	0	0.01	0	0.04	0	0.01	0.02	0.01	0.02	0.35	0.06	0.19	0.1	0.06	0.16	0.02	0.59	0.04	0.03	0.06	0.04	0.03	0.07	0.01	0.03	0.07
ENSMMUG00000003117	0.02	0	0.07	0.04	0.03	0.02	0.02	0.1	0.02	0.03	0.1	0.01	0.1	0.04	0.02	0.09	0.01	0.01	0.09	0	0.11	0.04	0.06	0.07	0.03	0.01	0.15	0.05	0.02	0.01	0	0.07	0.35	0.19	0.82	0.39	0.44	0.34	0.84	0.8	0.56	0.27	1.66	0.33	1.59	0.28	0.73	1.15	0.49
ENSMMUG00000003131	0	0.11	0.02	0	0	0	0	0.08	0	0.05	0	0	0	0.09	0	0.09	0	0.04	0	0.02	0	0	0	0	0	0	0	0	0	0.07	0.12	0	0	0.07	0.1	0.05	0.4	0.06	0.07	0.18	0	0	0	0.02	0.1	0.11	0	0.12	0
ENSMMUG00000003133	0	0.14	0.04	0	0.07	0	0	0.06	0.02	0.08	0.05	0.03	0	0.03	0.02	0	0	0.15	0	0.01	0.03	0	0	0.05	0.04	0.02	0	0	0.02	0	0	0	0.16	0.05	0.04	0	0	0.02	0	0.05	0.01	0.1	0.07	0	0.03	0	0.02	0	0
ENSMMUG00000003140	0.81	0.77	0.76	0.74	0.56	0.39	0.97	1.02	0.8	1	1.62	1.44	1.72	2.21	2.01	1.86	0.83	0.55	1.53	1.27	2.08	2.36	2.81	2.73	1.74	1	2.18	1.55	1.28	2.93	1.8	1.88	3.12	3.52	2.99	4.27	3.4	6.13	5.2	5.17	1.92	1.41	3.34	3.95	3.57	4.66	4.17	4.3	1.19
ENSMMUG00000003143	0.11	0.12	0.03	0.09	0.04	0.03	0.08	0.13	0.07	0.05	0.34	0.11	0.4	0.24	0.26	0.22	0.01	0.1	0.83	0.32	0.74	0.66	0.39	0.37	0.02	0.01	0.02	0.02	0.03	0.08	0.05	0.09	0.01	0.06	0.05	0.01	0.06	0.01	0.02	0	0.01	0	0.09	0.04	0.23	0.11	0.04	0.03	0.01
ENSMMUG00000003144	0.11	0.11	0.11	0.03	0.06	0.04	0.04	0.06	0.12	0.05	0.13	0.13	0.06	0.1	0.05	0.06	0.12	0.06	0.22	0.08	0.15	0.02	0.1	0.07	0.02	0	0.1	0.03	0	0.03	0.12	0	0.04	0.1	0.1	0.01	0.12	0.05	0.02	0.1	0.15	0.2	0.27	0.21	0.06	0.08	0.05	0.18	0.24
ENSMMUG00000003145	0.02	0.01	0.01	0.01	0.02	0	0.01	0.03	0.16	0.25	0.12	0.06	0.09	0.01	0.09	0.13	0.09	0.16	0.12	0.13	0.1	0.04	0.24	0.01	0.05	0.08	0.01	0.06	0.09	0.01	0.01	0	0.01	0.03	0.03	0.01	0	0.03	0.04	0	0.13	0.2	0.26	0.08	0.45	0.18	0.07	0.07	0.2
ENSMMUG00000003146	0.38	0.13	0.81	0.59	0.32	0.36	0.6	0.55	0.68	0.81	1.75	1.59	2.24	2.35	2.18	2.05	0.96	0.71	2.17	2.17	2.49	1.82	2.32	1.46	0.51	0.76	0.68	0.45	0.64	1.26	0.79	0.79	0.9	0.74	0.61	0.63	1.47	0.78	1.25	0.73	1.57	1.36	2.63	2.4	2.78	2.55	1.46	2.29	0.62
ENSMMUG00000003148	0.04	0.04	0.05	0.05	0.01	0.03	0.1	0.06	0.03	0.09	0.06	0.06	0.12	0.06	0.06	0.09	0.1	0.05	0.09	0.05	0.05	0.12	0.13	0.11	0.1	0.03	0.08	0.09	0.1	0.2	0.09	0.17	0.16	0.16	0.13	0.11	0.15	0.12	0.08	0.03	0.26	0.2	0.2	0.2	0.16	0.15	0.14	0.2	0.27
ENSMMUG00000003149	0.35	0.26	0.21	0.11	0.13	0.15	0.31	0.31	0.19	0.27	0.27	0.31	0.32	0.28	0.41	0.23	0.3	0.29	0.37	0.24	0.31	0.25	0.31	0.4	0.19	0.33	0.32	0.45	0.59	0.4	0.34	0.59	0.08	0.25	0.2	0.19	0.22	0.31	0.17	0.35	0.31	0.09	0.15	0.18	0.29	0.17	0.34	0.18	0.3
ENSMMUG00000003153	0	0	0	0	0.01	0	0.01	0.01	0.01	0	0	0.02	0	0	0.01	0	0.05	0	0.03	0	0	0	0.13	0	0	0	0	0.02	0	0	0.04	0	0	0.05	0.04	0	0.02	0.07	0.02	0	0	0.02	0.02	0.02	0.04	0.01	0.02	0.01	0.01
ENSMMUG00000003155	7.72	8.85	7.22	6.68	4.88	4.34	5.47	6.41	5.82	7.38	7.32	7.15	5.69	7.93	7.84	7.81	4.86	5.36	4.83	5.56	5.05	4.54	7.96	5.75	4.45	5.74	7.3	4.86	4.35	6.16	5.44	4.61	0.04	0.14	0.03	0.03	0.06	0.02	0.01	0.08	7.11	7.99	5.86	6.1	7.06	9.29	8.63	7.92	6.17
ENSMMUG00000003156	0.21	0.15	0.23	0.22	0.1	0.1	0.14	0.13	0.02	0.07	0.06	0.05	0.03	0.06	0.05	0	0	0	0.13	0.15	0.01	0.01	0.23	0.04	0	0.03	0.09	0.05	0.1	0.12	0.27	0.11	0.16	0.36	0.36	0.18	0.27	0.15	0.07	0.12	0.09	0.06	0.06	0.07	0.06	0.06	0.04	0.07	0.03
ENSMMUG00000003158	2.16	2	1.6	1.83	2	2.29	1.82	2.3	0.39	0.38	1.44	1.12	1.17	1.57	2.22	1.84	0.31	0.49	1.18	1.05	1.54	1.47	2.55	1.71	0.5	0.81	1.7	0.99	1.47	1.58	1.97	1.7	6.04	6.02	12.24	7.06	15.93	20.13	24.46	22.37	12.18	15.42	33.3	32.39	35.36	45.66	35.62	44.33	3.84
ENSMMUG00000003163	2.15	2.38	4.44	2.46	1.48	1.22	2.29	2.27	1.93	2.76	4.83	3.21	2.98	3.46	3.44	3.61	2.94	2.86	3.71	4.36	2.2	2.91	4.48	1.72	2.74	3.42	5.92	4.39	3.82	4.79	3.17	4.54	1.38	2.19	2.57	2.94	3.01	2.17	1.84	2.35	2.64	1.85	3.3	2.22	2.75	2.96	2.13	2.65	2.18
ENSMMUG00000003165	0.87	1.31	0.81	0.89	1.99	1.53	2.38	1.72	1.79	0.82	0.64	0.88	0.87	0.97	1.37	1.36	0.82	1	1.07	0.79	0.78	0.81	0.81	0.91	0.98	1.49	0.65	0.77	0.75	0.58	2.04	0.92	0.34	0.44	0.6	0.32	0.67	0.35	0.95	0.66	1.21	1.88	0.9	1.02	1.19	0.74	1.43	1.22	0.93
ENSMMUG00000003169	3.29	3.12	2.24	3.72	4.97	4.25	3.56	4.38	1.4	1.35	1.63	1.64	1.24	1.4	0.98	1.54	2.47	1.18	0.99	0.97	1.12	1.02	1.54	1.46	1.8	2.16	2.07	3.99	3.35	2.57	2.74	2.55	4.37	3.85	3.16	4.33	2.59	3.07	3.03	2.97	20.23	23.65	20.11	24.83	14.58	21.62	18.77	18.8	10.89
ENSMMUG00000003172	0.03	0.08	0.03	0	0	0	0.03	0.03	0	0	0	0.05	0.14	0.25	0	0	0	0	0	0	0	0	0	0	0	0.04	0	0	0	0	0	0.17	0	0	0	0	0	0	0.05	0	0.08	0.03	0	0.1	0	0	0	0	0
ENSMMUG00000003174	0.82	1.94	0.72	1.19	1.82	2.06	1.58	1.22	1.27	0.78	0.69	1.15	2.16	1.7	1.56	1.16	0.72	1.1	1.04	1.1	1.36	1.46	1.53	0.84	0.83	1.46	1	1.28	2.11	3.14	1.89	1.2	7.03	8.12	5.95	7.83	7.16	12.07	7.62	7.85	2.07	2.08	2.03	2.12	3.08	3.24	2.2	2.53	1.84
ENSMMUG00000003191	0.1	0.12	0.06	0.08	0.06	0.1	0.05	0.07	0.09	0.11	0.07	0.04	0.15	0.12	0.16	0.21	0.04	0.12	0.13	0.1	0.07	0.07	0.09	0.14	0.11	0.07	0.08	0.09	0.08	0.04	0.13	0.01	1.85	1.63	1.43	2.22	1.45	1.7	1.34	1.53	2.19	1.71	2.07	1.52	1.87	2.74	2.05	2.34	1.47
ENSMMUG00000003192	0.55	0.57	0.77	0.28	0.87	0.75	0.44	0.72	0.19	0.16	0.43	0.26	0.3	0.31	0.23	0.42	0.37	0.44	0.78	0.32	0.33	0.24	0.43	0.43	0.65	0.62	0.78	0.86	0.45	0.3	0.75	0.54	1.85	1.74	3.88	3	3.45	2.37	2.76	3.13	1.23	1.49	2.54	2.07	2.4	1.63	1.66	1.88	0.76
ENSMMUG00000003194	0.06	0.16	0.05	0.14	0.25	0.24	0.27	0.16	0.09	0.08	0.02	0.08	0.11	0.18	0.15	0.21	0.06	0.01	0.18	0.01	0.05	0.07	0.01	0.09	0.2	0.22	0.12	0.1	0.29	0.24	0.22	0.24	0.17	0.44	0.65	0.63	0.35	0.61	0.44	0.26	0.09	0.32	0.4	0.24	0.27	0.25	0.17	0.3	0.11
ENSMMUG00000003198	0.02	0.02	0.01	0.04	0.05	0.01	0.05	0	0.07	0.06	0.04	0	0.06	0.07	0.02	0.05	0	0.13	0.04	0.01	0.04	0.03	0	0	0.02	0	0	0	0	0.01	0.03	0.02	0.04	0.04	0.04	0.09	0.01	0	0.03	0.03	0.04	0.02	0.07	0.01	0.03	0.02	0.04	0.03	0
ENSMMUG00000003199	0.11	0.03	0.04	0.09	0.03	0.04	0.05	0.04	0.05	0.1	0.14	0.09	0.12	0.1	0.06	0.07	0.16	0.06	0.04	0.16	0.08	0.08	0.06	0.09	0.06	0.09	0.06	0.01	0.02	0.11	0.02	0.14	0.21	0.13	0.24	0.1	0.13	0.02	0.2	0.13	0.22	0.1	0.07	0.11	0.19	0.19	0.14	0.1	0.17
ENSMMUG00000003200	0	0.03	0.27	0.04	0.03	0.04	0.03	0.12	0.45	0.42	0.58	0.41	0.39	0.55	0.35	0.39	0.45	0.45	0.36	0.26	0.22	0.44	0.29	0.51	0.85	0.49	0.33	0.08	0.02	0.16	0.11	0.04	0.06	0.09	0.06	0.05	0.01	0.02	0.01	0.02	2.93	4.24	3.68	2.47	2.32	2.4	1.98	2.34	1.04
ENSMMUG00000003203	0.86	0.62	0.9	0.98	0.53	0.8	0.85	0.45	3.33	5	5.98	5.02	5.21	5.26	6.9	6.17	2.76	3.71	4.74	5.9	5.81	6.29	7.99	6.53	2.11	2.45	1.38	0.99	0.59	1.92	1.75	0.59	0	0	0.03	0.06	0	0.03	0	0	6.26	4.46	3.7	4.07	4.96	6.77	5.29	4.12	5.07
ENSMMUG00000003206	0.14	0.04	0.12	0	0.02	0.07	0	0	0.03	0.09	0.08	0	0.14	0.05	0.13	0.14	0	0	0.04	0.1	0	0	0	0.02	0	0.18	0	0	0.14	0.21	0	0	0.08	0	0	0.09	0.16	0.07	0	0.25	0	0	0.04	0	0	0	0	0	0
ENSMMUG00000003210	1.22	0.99	4.16	0.72	0.55	0.54	0.65	0.94	6.7	5.01	4.96	5.11	4.93	6.76	5.29	4.99	3.21	2.74	2.78	3.09	3.75	3.32	3.97	3.99	4.02	3.4	2.98	1.4	1.02	1.96	1.49	1.11	4.18	5.25	3.28	2.5	3.63	3.24	4.09	2.21	7.38	8.21	5.31	5.99	4.21	10.36	4.59	5.01	7.19
ENSMMUG00000003214	0	0.01	0.01	0.01	0	0.02	0	0.01	0.03	0.02	0.02	0	0.02	0.05	0.03	0	0	0	0.02	0.02	0	0.01	0	0	0.05	0	0.02	0	0	0.06	0.02	0	0	0.18	0.27	0.16	0	0.09	0.15	0.15	0.14	0.1	0.98	0.01	0.09	0.16	0	0.17	0.09
ENSMMUG00000003215	0	0	0.47	0	0	0.02	0	0	0	0	0.11	0.03	0	0	0	0	0	0.06	0.06	0	0	0	0	0	0.03	0	0.13	0.1	0.06	0.15	0	0.48	0.21	0	0.18	0.17	0	0	0.06	0.06	0.12	0.04	0.39	0	0	0.21	0	0.07	0.13
ENSMMUG00000003231	0.29	0.36	0.07	0.16	0.06	0.02	0.19	0.04	0.04	0.01	0.03	0.11	0.03	0.03	0.05	0.05	0.01	0	0.04	0.12	0.02	0.03	0.05	0	0.39	0.24	0.75	0.42	0.83	1.4	0.47	0.6	0.08	0.11	0.1	0.14	0.03	0.07	0.05	0.09	0.06	0.08	0.02	0.19	0.08	0.04	0.05	0.08	0.05
ENSMMUG00000003235	0	0	0	0	0	0	0	0	0	0	0	0	0	0	0	0	0	0	0	0	0	0	0	0	0	0	0	0	0	0	0	0	2.23	2.08	0.9	1.69	1.44	1.69	1.24	1.2	0.46	0.41	0.3	0.62	1.17	0.9	0.52	0.48	0.61
ENSMMUG00000003240	1.38	1.91	1.35	1.29	0.71	0.53	0.96	0.96	2.28	2.01	4.34	3.05	4.24	4.25	5.58	3.67	2.91	2.44	4.3	4.21	3.93	3.27	6.74	4.45	1.79	1.56	1.38	1.82	1.49	1.56	1.38	1.01	49.47	48.89	49.29	54.11	54.25	65.11	56.48	50.76	3.49	3.47	6.84	7.75	5.78	6.1	7.19	7.71	2.2
ENSMMUG00000003244	0.06	0.06	0.01	0.08	0.02	0.02	0.05	0.1	0.03	0.05	0	0.1	0.02	0.13	0.03	0.09	0.02	0.05	0.25	0.09	0.13	0.04	0.05	0.01	0.06	0	0.08	0.02	0.02	0.07	0.05	0.1	0.33	0.2	0.08	0.07	0.1	0.02	0	0.15	0.2	0.34	0.14	0.2	0.11	0.06	0.13	0.1	0.15
ENSMMUG00000003247	4.27	2.02	3.69	1.85	0.96	1.15	1.31	1.72	5	7.62	14.52	10.93	16.02	12.89	18.57	12.47	8.73	4.72	11.52	13.59	14.06	11.37	16.74	11.57	6.49	4.91	5.61	4.07	4.2	6.53	5.4	3.28	8.36	5.18	6.24	9.07	8.34	8.78	8.67	8.01	10.64	7.44	10.58	8.35	14.52	9.92	13.44	9.72	4.53
ENSMMUG00000003251	0	0	0.08	0.06	0.05	0	0.14	0.02	0.04	0.02	0.06	0	0.05	0	0.14	0.05	0	0	0.13	0	0	0	0.25	0.05	0.04	0	0	0.03	0	0	0.07	0.16	0.29	0.12	0.12	0.3	0.11	0.02	0.19	0.2	0.02	0.09	0.18	0.03	0.05	0.02	0.02	0.1	0
ENSMMUG00000003256	2.76	2.69	4.41	3.59	4.03	4.15	2.77	4.04	2.88	2.81	3.48	3.08	2.96	2.47	3.07	3.25	1.36	1.01	3.02	2.98	2.35	1.81	1.84	1.82	1.89	1.85	2.06	2.09	2.27	2	2.2	2.35	3.15	3.06	4.11	2.94	2.99	2.9	2.59	3.56	1.96	2.99	4.63	3.48	3.11	3.79	3.6	3.17	2.72
ENSMMUG00000003261	1.34	1.78	1.79	2.06	3.07	3.69	1.51	1.79	0.62	0.56	0.84	0.91	0.91	0.74	1.03	0.99	0.53	0.43	0.63	0.83	0.66	1	0.85	0.89	0.88	0.79	2.1	1.83	2.64	2.36	1.83	2.52	0.13	0.14	0.09	0.1	0.06	0.06	0.05	0.09	1.52	1.23	1.22	1.68	1.39	2.24	1.47	1.91	1.4
ENSMMUG00000003265	0.59	0.58	0.48	0.45	0.85	0.74	0.51	0.5	0.09	0.09	0.22	0.08	0.12	0.11	0.18	0.1	0.13	0.1	0.24	0.15	0.09	0.06	0.08	0.14	0.23	0.18	0.21	0.35	0.52	0.24	0.51	0.33	0.35	0.24	0.7	0.3	0.29	0.1	0.16	0.18	1.02	1.19	1.1	0.75	0.87	0.29	0.46	0.5	0.52
ENSMMUG00000003266	0.03	0	0.02	0.04	0.01	0.03	0.04	0.02	0.01	0	0	0	0.04	0.02	0.02	0.02	0	0.03	0.02	0.03	0.05	0.02	0	0	0	0	0.03	0.07	0	0.08	0.02	0.03	0	0.06	0.04	0.05	0.03	0.03	0.02	0.02	0.01	0	0	0	0.02	0	0	0.01	0.01
ENSMMUG00000003268	0.02	0.01	0.02	0.05	0.01	0.01	0	0.03	0.08	0.09	0.07	0.11	0.1	0.02	0.01	0.07	0	0	0.05	0	0.01	0.02	0	0.09	0.01	0.04	0.09	0	0.11	0.07	0	0.02	0.37	0.15	0.14	0.09	0.14	0.18	0.45	0.07	0.17	0.06	0.17	0.19	0.07	0.13	0.06	0.03	0.02
ENSMMUG00000003271	0.01	0.01	0.07	0.03	0.02	0.02	0.04	0	0.01	0.03	0.05	0.08	0.13	0.19	0.08	0.04	0.22	0.08	0.15	0.12	0.01	0.09	0.03	0.03	0.04	0.03	0.05	0.03	0.09	0.04	0.04	0.03	0.08	0.05	0.13	0.11	0.07	0.04	0.06	0.07	0.27	0.09	0.02	0.12	0.11	0.23	0.14	0.18	0.05
ENSMMUG00000003272	0.74	0.1	0.14	0.17	0.24	0.17	0.12	0.2	0.23	0.32	0.15	0.16	0.21	0	0.05	0.5	0.46	0.18	0.09	0.29	0.23	0.03	0.27	0.26	0.28	0.29	0.08	0.38	0.31	0.23	0.18	0.34	1.38	0.75	0.23	0.46	0.76	1.8	0.9	0.62	0.41	0.51	0.45	0.31	0.89	0.43	0.29	0.42	0.69
ENSMMUG00000003274	1.19	1.36	0.65	0.78	0.95	0.83	0.87	1.16	0.29	0.28	0.3	0.27	0.5	0.44	0.43	0.39	0.26	0.32	0.27	0.38	0.36	0.37	0.62	0.39	0.39	0.28	0.33	0.52	0.86	0.96	0.6	0.85	0.04	0.04	0.07	0.08	0.03	0.05	0.04	0.03	0.44	0.33	0.43	0.28	0.14	0.25	0.24	0.4	0.52
ENSMMUG00000003277	12.75	14.83	7.54	9.88	8.47	10.72	12.59	13.57	7.01	6.82	6.97	5.1	4.15	5.52	4.36	4.45	4.28	3.13	2.88	2.58	2.73	2.28	3.21	3.64	6.77	6.73	9.78	8.65	10.65	5.44	10.37	8.29	1.31	0.71	0.4	0.65	0.24	0.24	0.19	0.35	16.52	25.08	17.36	16.21	11.07	11.83	10.56	15.51	19.22
ENSMMUG00000003282	0.45	0.3	0.92	0.85	0.87	0.48	0.45	0.75	0.44	0.28	0.64	0.45	0.29	0.21	0.27	0.37	0.4	0.3	0.44	0.26	0.17	0.07	0.24	0.3	0.34	0.31	0.46	0.51	0.36	0.23	0.32	0.47	0.07	0.09	0.04	0.06	0.03	0.05	0.1	0.03	0.36	0.54	0.36	0.66	0.23	0.18	0.17	0.12	0.55
ENSMMUG00000003285	0.66	0.18	0.3	0.18	0.73	0.26	0.09	0.27	0.08	0.9	0.2	0.26	1.55	0.43	0.15	0.17	0.78	0.23	0.2	0.28	1.02	0.28	0	0.12	0.2	0.17	0.25	0.23	0.64	0.44	0	0.48	0.16	0.1	0.39	0.25	1.72	0.5	0.43	0.25	0.19	0.19	0.17	0.24	1.54	0.53	0.05	0.34	0.21
ENSMMUG00000003286	0.12	0.15	0.04	0	0.05	0.11	0	0.02	0.16	0.07	0	0.08	0	0.03	0.02	0.02	0.38	0.02	0.13	0.01	0	0.15	0.21	0	0	0.13	0.03	0	0.07	0	0	0.19	0.06	0.1	0.04	0.05	0.06	0.29	0	0	0.18	0.53	0.46	0.03	0	0.03	0.19	0.1	0.38
ENSMMUG00000003289	0.11	0.18	0.05	0.04	0.05	0.09	0.07	0.02	0.07	0.1	0.05	0.06	0.01	0.03	0.11	0.02	0.12	0.1	0.1	0.06	0.08	0.07	0.06	0.03	0.12	0.02	0.07	0.1	0.1	0.2	0.14	0.01	0.04	0.02	0.03	0.06	0.05	0.05	0.03	0.06	0.03	0.19	0.05	0.08	0.12	0.13	0.06	0.08	0.09
ENSMMUG00000003297	0.28	0.28	0.58	0.52	0.38	0.54	0.42	0.55	0	0	0	0	0.04	0	0.01	0.07	0	0.01	0	0	0	0	0.03	0.01	0.02	0.15	0.47	0.21	0.15	0.25	0.18	0.52	0.29	0.08	0.14	0.29	0.22	0.22	0.18	0.15	0.04	0.04	0.06	0.01	0.01	0.12	0.07	0.01	0.01
ENSMMUG00000003300	2.78	2.52	3.97	3.38	2.99	3.27	3.53	3.54	7.22	7.12	6.47	5.65	3.63	6.56	5.97	4.98	4.65	3.46	3.35	5.23	2.8	3.35	5.14	2.72	3.15	3.67	2.01	2.81	1.64	3.12	2.39	1.64	0.41	0.37	0.29	0.42	0.26	0.3	0.27	0.22	9.35	10.77	3.29	4.28	2.64	5.21	3.18	2.72	8.27
ENSMMUG00000003301	0.02	0.12	0.06	0.04	0.02	0.03	0.08	0.07	0.4	0.52	0.28	0.43	0.33	0.22	0.21	0.16	0.21	0.26	0.13	0.33	0.09	0.12	0.17	0.02	0.21	0.17	0.06	0.02	0.01	0.15	0.11	0.04	0.19	0.15	0.16	0.22	0.12	0.18	0.18	0.17	1.3	2.03	0.5	0.42	0.6	0.76	0.33	0.28	1.09
ENSMMUG00000003309	0.27	0.25	0.28	0.46	0.63	1.97	0.69	0.36	0.17	0.27	0.33	0.37	0.46	1.18	0.49	0.49	0.52	0.23	0.46	0.24	0.45	1.26	0.35	0.66	0.44	0.3	0.36	0.26	0.09	0.99	0.28	0.06	1	0.81	1.47	1.3	1.69	3.84	1.42	1.5	0.93	0.93	2.03	1.46	1.51	2.88	1.65	1.13	0.7
ENSMMUG00000003319	0	0	0.15	0.02	0.02	0.02	0	0	3.08	3.19	1.23	1.5	1.8	1.17	1.17	1.55	1.2	1.41	0.73	1.44	1.04	0.63	0.78	0.54	0.3	0.43	0.03	0.01	0	0.09	0.03	0.01	0.02	0.01	0.01	0.01	0.01	0.02	0.01	0	0.45	0.67	0.01	0.06	0.07	0.03	0.01	0.02	2.72
ENSMMUG00000003320	0.63	0.7	0.53	0.73	0.52	0.56	0.48	0.56	0.52	0.49	0.41	0.44	0.47	0.38	0.48	0.52	0.51	0.31	0.35	0.42	0.35	0.22	0.2	0.3	0.45	0.56	0.53	0.25	0.39	0.3	0.63	0.4	0.37	0.47	0.34	0.32	0.42	0.29	0.15	0.15	0.35	0.55	0.59	0.5	0.61	0.39	0.55	0.48	0.41
ENSMMUG00000003322	0	0	0	0	0	0	0	0	0	0	0	0	0	0	0	0	0	0	0	0	0	0	0	0	0	0	0	0	0	0	0	0	0.44	0.29	0.11	0.77	0.19	0.49	0.14	0.04	0.27	0.17	0.6	0.63	0.64	0.11	0.67	0.42	0.22
ENSMMUG00000003324	0.02	0.01	0	0.02	0.03	0.04	0.08	0.01	0.02	0.02	0.02	0.14	0.01	0.01	0.03	0.01	0	0.03	0.03	0.06	0.01	0.01	0.04	0.01	0.04	0.02	0.02	0	0	0.04	0.03	0.01	0.15	0.15	0.03	0	0.22	0.2	0.1	0.2	0	0.1	0	0.04	0.14	0.02	0.05	0.08	0.12
ENSMMUG00000003329	1.89	1.88	2.68	1.55	1.33	2.2	1.52	1.42	5.93	5.5	4.12	5.55	5.71	4.21	3.83	4.51	3.26	3.34	3.2	3.64	3.05	2.49	2.13	3.38	4.23	3.61	2.06	2.02	1.85	1.53	2.02	1.14	9.24	15	11.95	5.2	7.35	6.22	8.89	6.19	201.18	291.79	131.01	132.31	112.92	89.98	103.72	99.72	141.35
ENSMMUG00000003334	0.07	0.07	0.12	0.07	0.05	0.11	0.08	0.08	0.1	0.13	0.08	0.07	0.05	0.06	0.08	0.11	0.08	0.05	0.11	0.08	0.07	0.03	0.04	0.04	0.06	0.02	0.09	0.06	0.08	0.05	0.06	0.11	0.08	0.16	0.1	0.15	0.1	0.09	0.11	0.12	0.08	0.09	0.1	0.04	0.1	0.05	0.04	0.04	0.14
ENSMMUG00000003336	0.02	0	0	0	0.01	0	0	0	0.01	0.02	0	0.02	0	0	0	0	0.01	0	0	0.06	0	0	0.01	0.03	0.01	0.02	0.02	0	0	0	0.02	0	0.06	0	0.01	0.06	0	0	0.06	0	0.01	0	0	0	0	0	0.13	0	0.02
ENSMMUG00000003345	22.56	29.1	61.48	30.82	22.65	24.66	65.67	53.75	3.97	2.36	12.3	7.89	10.24	16.8	11.67	11.4	7.72	8.72	27.82	14.02	22.88	24.21	26.23	34.96	70.98	76.78	148.46	118.14	79.54	119.37	90.72	138.92	10.91	7.06	15.88	11.95	13.11	12.45	13.94	18.93	6.92	8.56	24.99	32.16	19.67	20.22	45.14	29.59	3.11
ENSMMUG00000003354	0.01	0.03	0.02	0.01	0.01	0.06	0.01	0.01	0.02	0.01	0.08	0.04	0.08	0.07	0.13	0.06	0.01	0	0.17	0.13	0.1	0.17	0.12	0.07	0	0.04	0.05	0.06	0.06	0.06	0.02	0	0.02	0.03	0.01	0	0.02	0.01	0.03	0.01	0.01	0.05	0.07	0.02	0.05	0.12	0.11	0.02	0.02
ENSMMUG00000003356	3.35	3.68	1.78	2.35	2.71	3.31	2.21	2.35	2.59	2.89	1.55	1.76	1.13	1.54	1.72	1.65	2.57	2.54	0.9	1.44	1	1.1	1.18	1.02	1.92	2.26	1.49	1.77	1.79	2.69	1.79	1.94	0.29	0.21	0.06	0.09	0.04	0.09	0.02	0.04	1.41	1.69	0.44	0.93	0.3	0.81	0.78	0.63	2.75
ENSMMUG00000003359	0	0.02	0.02	0	0.03	0.05	0	0.05	0.19	0.04	0	0	0	0	0.19	0.2	0.13	0.03	0.03	0.2	0	0.31	0	0.05	0.04	0	0.08	0.06	0	0.06	0	0.2	0.06	0	0.13	0.16	0.28	0.22	0.32	0.24	0.06	0.19	0	0	0.01	0	0	0	0.04
ENSMMUG00000003362	0.5	0.48	0.38	0.26	0.25	0.43	0.43	0.25	0.29	0.33	0.33	0.24	0.49	0.59	0.24	0.23	0.2	0.32	0.21	0.15	0.67	0.48	0.12	0.23	0.45	0.34	1.18	0.5	0.51	0.22	0.75	0.46	1.91	1.75	1.54	1.08	1.95	1.05	0.84	1.34	0.71	0.75	0.56	0.31	1.22	0.64	0.57	0.83	1.1
ENSMMUG00000003364	0.17	0.04	0.21	0.19	0.14	0.08	0.04	0.2	0.32	0.26	0.25	0.15	0.12	0.1	0.13	0.07	0.08	0.06	0.47	0.57	0.09	0.12	0.01	0.1	0.12	0.27	0.33	0.16	0.01	0.14	0.17	0.13	0.5	0.49	1.1	0.74	0.18	0.43	0.37	0.68	0.34	0.24	0.94	0.62	0.35	0.58	0.76	0.65	0.69
ENSMMUG00000003365	0.01	0.03	0.01	0.06	0.05	0.04	0.04	0	0.05	0	0.06	0.05	0.14	0.02	0.02	0.09	0.01	0	0.08	0.08	0	0.01	0	0.03	0	0.07	0	0.01	0.05	0.01	0.03	0	0	0.03	0	0.02	0	0.04	0.01	0.02	0.01	0.11	0.04	0.04	0	0.02	0.01	0.14	0
ENSMMUG00000003373	0.05	0.02	0.09	0.04	0.02	0.06	0.04	0.05	0.03	0.05	0.02	0.08	0.07	0.05	0.04	0.08	0.06	0.04	0.04	0.03	0.03	0.01	0.03	0.03	0.07	0.05	0.07	0.16	0.06	0.07	0.03	0.06	0.02	0.02	0.05	0.05	0.02	0.05	0.04	0.03	0.09	0.03	0.11	0	0.03	0.05	0.01	0.01	0.03
ENSMMUG00000003383	1.81	1.58	3.54	1.34	0.82	0.93	0.81	0.77	3.37	1.51	2.44	3.21	1.55	3.61	2.67	2.53	1.63	1.39	0.86	1.22	1.38	1.89	2.55	2.78	3.75	4.59	2.61	3.36	1.46	4.06	1.74	1.4	27.52	34.95	23.69	26.78	26.68	31.7	28.5	28.9	1.62	1.91	2.67	7.98	2.08	2.77	4.4	3.59	1.37
ENSMMUG00000003384	0.07	0.15	0.27	0.19	0.24	0.3	0.19	0.26	0.12	0.14	0.25	0.25	0.2	0.22	0.09	0.15	0.1	0.06	0.1	0.24	0.17	0.2	0.37	0.13	0.13	0.12	0.17	0.17	0.11	0.17	0.17	0.34	0.26	0.31	0.38	0.68	0.27	0.7	0.42	0.5	0.81	0.64	0.79	0.99	0.87	0.99	0.62	0.85	0.24
ENSMMUG00000003388	0.01	0	0.06	0.02	0.03	0.02	0.01	0.03	0.01	0.02	0.02	0	0	0	0.01	0.01	0	0	0	0.02	0	0	0	0	0.01	0.01	0.02	0.01	0	0.07	0.02	0	0.03	0.01	0.02	0.04	0.02	0	0.01	0.01	0.01	0	0	0	0	0	0.02	0.02	0.01
ENSMMUG00000003390	0.1	0.14	0.1	0.18	0.08	0.09	0.11	0.09	0.11	0.07	0.18	0.05	0.18	0	0.06	0.07	0	0.04	0.05	0.18	0.07	0.21	0.14	0.05	0.12	0.06	0.19	0.14	0.1	0.21	0.16	0.12	0.29	0.28	0.21	0.1	0.28	0.53	0.27	0.2	0.16	0.21	0.28	0.08	0.26	0.1	0.22	0.19	0.13
ENSMMUG00000003394	1.45	1.27	1.34	1.27	1.25	0.93	0.84	1.04	0.5	0.96	0.36	0.26	0.26	0.19	0.21	0.16	0.59	0.65	0.39	0.26	0.31	0.23	0.04	0.08	0.81	0.99	1.9	1.49	1.13	1.11	1.41	1.73	0.37	0.55	0.47	0.57	0.75	0.32	0.43	0.3	0.68	0.59	0.83	0.31	0.73	0.27	0.19	0.16	0.93
ENSMMUG00000003398	2.55	2.72	2.65	3.46	2.01	1.93	3.18	3.19	1.3	0.86	1.02	1.39	0.97	1.02	1.87	1.32	0.35	0.72	1.27	1.42	0.79	0.66	0.57	0.54	0.96	1.03	1.3	1.78	1.23	0.92	2.56	1.84	0.23	0.11	0.22	0.17	0.11	0.07	0.15	0.24	0.38	0.42	0.58	0.49	0.38	0.64	1.16	0.61	1.44
ENSMMUG00000003402	0.19	0.09	0.01	0	0.03	0.02	0.07	0.01	0.46	0.16	0.28	0.12	0.1	0.13	0.12	0.09	0.22	0.18	0.16	0.12	0.17	0.37	0.37	0.31	0.08	0.19	0.04	0	0.07	0	0.02	0.24	0	0.01	0.03	0.02	0.17	0	0	0	2.04	1.27	2.12	1.41	1.12	1.89	1.53	2.22	0.47
ENSMMUG00000003404	0	0	0.02	0.01	0.01	0	0	0.02	0.05	0.06	0	0.01	0.03	0	0.07	0	0.02	0	0.01	0.03	0	0.06	0.02	0	0.04	0.03	0.03	0	0	0	0	0	0.09	0.09	0.07	0	0.06	0.05	0.08	0.05	0.68	0.75	0.82	0.8	0.4	1.02	0.57	0.82	0.21
ENSMMUG00000003414	0.1	0.13	0.14	0.05	0.07	0.11	0.13	0.1	0.36	0.23	0.15	0.2	0.25	0.2	0.17	0.18	0.38	0.34	0.25	0.14	0.16	0.21	0.06	0.06	0.31	0.36	0.08	0.14	0.08	0.1	0.13	0.08	0.08	0.14	0.22	0.1	0.17	0.18	0.15	0.12	1.76	2.1	1.27	0.92	0.89	1.99	0.66	0.59	1.04
ENSMMUG00000003418	0.05	0.13	0.3	0.04	0.05	0.24	0.3	0.12	0.27	0	0.08	0.16	0.08	0.05	0.1	0.21	0.16	0.18	0.12	0.13	0.08	0.05	0.07	0.1	0.33	0.19	0.35	0.33	0.25	0	0.39	0	0.17	0.42	0.51	0.23	0	0.22	0	0.26	0.12	0.18	0.26	0.17	0.2	0.13	0.17	0.06	0.06
ENSMMUG00000003420	0.01	0.01	0	0.01	0.01	0.01	0.04	0.08	0	0	0.01	0.01	0.02	0	0	0.02	0	0.01	0.04	0.01	0	0.01	0.01	0	0.01	0	0.01	0	0.02	0	0.05	0	0	0.03	0	0.03	0	0.01	0.01	0.02	0	0.02	0	0	0.01	0.02	0	0.02	0
ENSMMUG00000003423	0.13	0.17	0.1	0.02	0.07	0.04	0.04	0.03	0.21	0.35	0.15	0.37	0.25	0.27	0.37	0.17	0.29	0.24	0.16	0.34	0.19	0.28	0.41	0.17	0.2	0.18	0	0	0.05	0.01	0.03	0	0.01	0	0	0.04	0	0.04	0	0	2.18	1.88	1.53	1	2.75	0.95	1.45	1.38	0.85
ENSMMUG00000003424	0.03	0.07	0.01	0.01	0.02	0.04	0.05	0.05	0.02	0.03	0	0.06	0.04	0.01	0.03	0.04	0.02	0.01	0	0	0.11	0.02	0	0	0.01	0.01	0.01	0	0.03	0.07	0.07	0.01	0.08	0.14	0.07	0.03	0.08	0.05	0.13	0	0	0	0.04	0	0.04	0	0.05	0.04	0.03
ENSMMUG00000003425	0.23	0.39	0.45	0.48	0.67	1.07	0.72	0.86	0.52	0.2	0.33	0.4	0.19	0.55	0.57	0.65	0.2	0.15	0.7	0.22	0.34	0.42	0.48	0.71	0.27	0.3	0.31	0.37	0.39	0.97	0.55	0.27	0.66	0.23	1.73	0.53	0.06	0.63	0.97	1.35	2.03	3.49	5.16	4.36	2.81	6.89	5.51	6.18	1.62
ENSMMUG00000003427	0.02	0.09	0.11	0.04	0.07	0.06	0.08	0.12	0.01	0.04	0.03	0.02	0.07	0.07	0.07	0.08	0	0	0.07	0.07	0	0.05	0.09	0.06	0.02	0.04	0.04	0.03	0.1	0.04	0.05	0	1.06	0.52	0.41	0.37	0.15	0.2	0.13	0.24	0.01	0	0.05	0.04	0.01	0.04	0.02	0.03	0.03
ENSMMUG00000003428	0.18	0.31	0.09	0.34	0.23	0.21	0.15	0.3	0.03	0.01	0.03	0.07	0.06	0.01	0.03	0.08	0.04	0.02	0.13	0.06	0.08	0.08	0.11	0.06	0.03	0.06	0.12	0.09	0.26	0.17	0.19	0.09	0.09	0.13	0.07	0.15	0.1	0.11	0.09	0.11	0.17	0.21	0.21	0.18	0.18	0.2	0.23	0.15	0.33
ENSMMUG00000003431	0.13	0.14	0.04	0.16	0.08	0.09	0.13	0.13	0	0.03	0.03	0.04	0.04	0.05	0.03	0.06	0.01	0.04	0.02	0.01	0.02	0	0.08	0.01	0.02	0.02	0.02	0.03	0.06	0.01	0.01	0.01	0.12	0.06	0.03	0.04	0.03	0.02	0.04	0.03	0.04	0.03	0	0.03	0.01	0.07	0.03	0.02	0.03
ENSMMUG00000003433	0.02	0	0	0.02	0.02	0.02	0.01	0.03	0.01	0.02	0.05	0.05	0.06	0.06	0.04	0.02	0.01	0	0.02	0	0	0.06	0	0.01	0	0.01	0.03	0.05	0	0.02	0.05	0.01	4.66	1.9	6.85	6.72	8.21	5.89	2.24	7.31	0.19	0.08	0.47	0.26	0.59	0.5	0.48	0.5	0.29
ENSMMUG00000003436	0.04	0.06	0.05	0.04	0.04	0	0.04	0.03	0.03	0.02	0.01	0.02	0.01	0.01	0.01	0.02	0	0.01	0.02	0.03	0.01	0.03	0.02	0.03	0.03	0.08	0.38	0.12	0.05	0.18	0.12	0.08	0.01	0.02	0.01	0.02	0.07	0.06	0.02	0.04	0.01	0.04	0.01	0	0	0.01	0	0.05	0.03
ENSMMUG00000003451	0.14	0	0	0.02	0.05	0.1	0.08	0	0.2	0.14	0.14	0.18	0	0	0.04	0.08	0.16	0	0.1	0	0	0.08	0.05	0.08	0.07	0.07	0.22	0.18	0	0	0.11	0.05	0.13	0.47	0.56	0.07	0.07	0.04	0.45	0.4	0.34	0.13	0.41	0.05	0.05	0.21	0.32	0.22	0.01
ENSMMUG00000003455	0.03	0	0.02	0	0.01	0	0.02	0	0.11	0.12	0.16	0.07	0.04	0.08	0.05	0.12	0.24	0.01	0.2	0	0.03	0.04	0.01	0	0.26	0.22	0	0	0	0.02	0.03	0.03	0.18	0	0.02	0.04	0.02	0.04	0	0.08	0.69	1.39	0.37	1.07	0.94	0.64	0.88	1.05	0.26
ENSMMUG00000003459	0.02	0.13	0.11	0.05	0.1	0.1	0.02	0.05	0.07	0	0.09	0	0.11	0.22	0	0.03	0.03	0	0.03	0.02	0.02	0.02	0.03	0	0.04	0.14	0.2	0.12	0.03	0.13	0.07	0.07	0.43	0.35	0.35	0.27	0.06	0.45	0.06	0.08	0.08	0.07	0.09	0.09	0.05	0.35	0	0.21	0.21
ENSMMUG00000003460	0	0.03	0.06	0.06	0.07	0.03	0.07	0.1	0.09	0.14	0	0	0.16	0.15	0.19	0	0.07	0.1	0.03	0.16	0.08	0.04	0	0.04	0.04	0	0	0	0.05	0.81	0.14	0.07	0	0.05	0.26	0.04	0	0	0	0	0	0.24	0.14	0.02	0.02	0	0	0.2	0
ENSMMUG00000003462	5.2	5.51	6.56	5.15	5.34	5.32	4.44	4.48	7.57	7.46	5.92	5.95	5.16	4.62	6.51	5.23	4.21	3.57	2.75	4.34	2.87	2.21	2.67	2.16	3.55	3.54	2.43	3.35	2.54	3.07	3.84	2.08	7.13	5.88	7.28	7.75	5.25	10.64	8.75	5.39	4.29	5.69	1.98	3.04	2.38	1.75	2.39	1.71	9.07
ENSMMUG00000003463	3.84	4.27	7.08	7.85	5.91	4.94	4.97	4.46	4.23	6.51	5.38	5.47	4.54	2.23	3.74	3.77	3.53	3.72	4.74	7.75	4.92	3.32	3.57	4.01	3.72	4.98	7.89	11	6.15	4.05	5.88	7.59	6.24	7.95	6.62	8.95	7.62	6.22	6	5.51	4.26	7.82	5.93	7.48	6.57	6.99	6.62	4.82	4.95
ENSMMUG00000003473	0.21	0.12	0.17	0.15	0.06	0.21	0.07	0.11	0.24	0.48	0.24	0.11	0.82	0.39	0.16	0.4	0.16	0.18	0.22	0.17	0.3	0.2	0.14	0.25	0.19	0.24	1.8	1.02	0.66	0.63	0.45	0.44	3.13	2.01	0.8	1.57	0.46	0.73	0.27	0.65	0.05	0.08	0.14	0.09	0.15	0.24	0.06	0.12	0.14
ENSMMUG00000003474	1.97	1.72	1.39	1.01	1.19	0.94	0.95	1.12	4.76	3.97	3.76	3.91	2.49	3.21	2.7	2.39	3.34	1.86	1.96	1.97	2.19	2.42	2.11	2.17	2.96	1.95	1.26	0.97	0.77	1.01	1.35	1.2	1.37	1.23	1.68	1.08	1.64	1.41	1.26	0.88	8.67	8.87	10.53	9.28	6.89	8.26	8.67	8.65	8.67
ENSMMUG00000003475	0.54	0.78	0.65	0.98	0.82	0.8	0.73	1.23	0.24	0.3	0.35	0.36	0.21	0.47	0.45	0.32	0.15	0.11	0.17	0.25	0.17	0.16	0.14	0.14	0.16	0.16	0.28	0.19	0.34	0.26	0.63	0.33	2.54	3.26	2.42	1.69	2.48	2.14	2.27	2.84	0.3	0.46	0.85	0.84	0.57	0.99	1	1.1	0.34
ENSMMUG00000003479	0.03	0.01	0.01	0.01	0.03	0.02	0.02	0.02	0.02	0.02	0.04	0.02	0.03	0.01	0.03	0.01	0.01	0.01	0.02	0.02	0.1	0.04	0	0.05	0.02	0	0.01	0.05	0.01	0.02	0.01	0.01	0.02	0.01	0.01	0	0.01	0.04	0	0.04	0.01	0	0	0.03	0	0	0.01	0.01	0.01
ENSMMUG00000003481	0	0.03	0.07	0.02	0	0.02	0	0	0	0	0	0.02	0.04	0.05	0.02	0	0.01	0.02	0	0	0.01	0	0.1	0.03	0	0	0.02	0.06	0	0.22	0	0.07	0.02	0	0.02	0	0	0	0	0.11	0	0.07	0.07	0.07	0	0	0	0.01	0
ENSMMUG00000003486	3.91	1.86	7.24	2.02	1.9	2.18	1.67	1.94	2.01	3.58	5.4	2.33	1.79	2.33	1.07	3.9	3.5	2.63	7.59	3.58	2.12	2.48	1.02	1.64	4.63	2.38	8.61	1.89	1.7	2.97	1.65	3.95	0.85	0.27	2.08	0.51	0.86	0.39	0.39	0.65	1.65	1.14	3.55	1.05	1.25	0.94	1.04	1.07	3.02
ENSMMUG00000003488	2.76	2.62	2.64	2.5	1.89	2.5	1.81	2.97	0.99	0.98	0.94	1.08	1.3	0.42	0.95	0.91	0.45	1.17	0.43	0.6	0.4	0.46	0.47	0.51	1.12	1.18	1.17	1.91	1.49	1.5	2.29	2.16	1.07	0.79	0.51	0.37	0.4	0.49	0.61	0.41	9.48	11.29	6.95	7.17	7.67	10.03	11.66	8.39	10.32
ENSMMUG00000003489	0.21	0.21	0.06	0.15	0.31	0.14	0.61	0.16	0.12	0.19	0	0.04	0.22	0.05	0.1	0.24	0.11	0.02	0.07	0.15	0.2	0.02	0.22	0	0.09	0.09	0.15	0.12	0.21	0	0.05	0	0	0.05	0	0.45	0.04	0.07	0.42	0.11	0.63	1.27	1.2	0.94	1.79	2.3	0.91	1.17	1.01
ENSMMUG00000003497	0.02	0.03	0.04	0.02	0.02	0.01	0.01	0.01	0.04	0.02	0.01	0.02	0.02	0.04	0.02	0.03	0.02	0.01	0.02	0.02	0.03	0.02	0.01	0.01	0.03	0.03	0.02	0.03	0.02	0.05	0.01	0.01	25.97	28.74	19.33	24.3	20.54	24.86	21.7	21.37	0.02	0.01	0.02	0.02	0.02	0.02	0.03	0.01	0.01
ENSMMUG00000003499	0.7	0.73	0.81	0.55	0.5	0.57	0.45	0.54	1.87	1.8	1.4	1.39	1.1	1.27	0.91	1.04	1.61	1.26	0.96	1	0.73	0.85	1.1	0.84	1.22	1.26	0.84	0.74	0.73	0.7	0.84	0.67	2.13	2.61	1.8	2.64	2.67	2.53	1.85	2.22	3	3.74	1.86	2.88	1.6	1.73	1.71	1.86	2.02
ENSMMUG00000003504	0.04	0.04	0.13	0	0.04	0	0.07	0.08	0	0.01	0.08	0	0.14	0	0	0.04	0.13	0	0.21	0	0.23	0	0	0.01	0	0.02	0.11	0.03	0	0	0.02	0.03	0.03	0	0.13	0.09	0	0.01	0.11	0.05	0.08	0.01	0.16	0.12	0.04	0	0.02	0.02	0.04
ENSMMUG00000003510	0.17	0	0.1	0.3	0.2	0.05	0.1	0	0	0	0.28	0	0	0.11	0.3	0.08	0.11	0.26	0.05	0.1	0.99	0	0.05	0.29	0	0	0.09	0.09	0	0	0.22	0.21	0.37	0.31	0.38	0.42	0.57	0.6	0.56	0.67	0	0.07	0	0	0	0.01	0	0	0.06
ENSMMUG00000003511	0.06	0.05	0.05	0.02	0.04	0.01	0.04	0.02	0.02	0.09	0.03	0.01	0.02	0.07	0.07	0.02	0.02	0.03	0.01	0.05	0.02	0.08	0.04	0.01	0.03	0.01	0.04	0.06	0.06	0.08	0.04	0.05	0.23	0.3	0.26	0.25	0.41	0.44	0.48	0.37	0.12	0.12	0.22	0.13	0.15	0.32	0.23	0.17	0.04
ENSMMUG00000003515	0.02	0.01	0	0.01	0.01	0.02	0	0	0.01	0	0.05	0.03	0.05	0.07	0	0.15	0.01	0	0.01	0.1	0.06	0.04	0.04	0	0	0	0.04	0.07	0.02	0.02	0	0	0.02	0.07	0.03	0.07	0.01	0.01	0.05	0.07	0	0.02	0.03	0	0.03	0.03	0.02	0.06	0.02
ENSMMUG00000003516	0.04	0.04	0	0.17	0.08	0.02	0.16	0.21	0.1	0.11	0.04	0.07	0.06	0.04	0.14	0.09	0.1	0.18	0	0.09	0.38	0.15	0.15	0.11	0.05	0.03	0.07	0	0	0	0.04	0.44	0.29	1.28	0.46	0.83	0.92	0.97	1.19	1.65	0.67	0.45	0.42	1.16	1.07	1.82	1.94	0.8	0.54
ENSMMUG00000003519	0.99	0.99	0.59	0.9	0.66	0.62	1.03	0.73	1.09	0.7	0.66	0.39	0.65	0.59	0.89	1.2	0.4	0.59	1.09	1.21	0.41	0.16	1.05	0.61	0.9	0.97	1.07	0.55	0.78	1.07	0.69	0.88	2.61	2.77	2.06	2.41	1.67	2.56	2.67	1.87	0.85	1.01	1.45	0.6	0.59	0.52	0.88	0.88	0.89
ENSMMUG00000003525	0	0.01	0.19	0.05	0.02	0.01	0	0.01	0.07	0.04	0.15	0.1	0.09	0.1	0.13	0.06	0.03	0.05	0.09	0	0.05	0.09	0.18	0.17	0.11	0.15	0.19	0.15	0.08	0.29	0.09	0.15	0.02	0.05	0.03	0.02	0.05	0.04	0.02	0	0.03	0.09	0.08	0.1	0.06	0.12	0.23	0.15	0.03
ENSMMUG00000003528	0.02	0.02	0.01	0	0.01	0.02	0.04	0.01	0.03	0	0.05	0	0.02	0	0	0.02	0.01	0	0.09	0.03	0	0	0.02	0	0.01	0	0	0.01	0.02	0	0.03	0	0	0.01	0.02	0.02	0	0.02	0.03	0.01	0.02	0.04	0	0	0	0.08	0.01	0.05	0.01
ENSMMUG00000003532	0.03	0.2	0.07	0.08	0.32	0.62	0.17	0.6	0.16	0.05	0.18	0.13	0.72	0.29	0.4	0.23	0.07	0.14	0.57	0.38	0.34	0.34	0.79	0.53	0.24	0.11	0.14	0.17	0.11	0.27	0.51	0.25	0.76	1.58	0.97	1.02	3.99	0.51	1.04	1.28	0.19	0.29	0.52	0.3	0.7	0.58	0.81	1.29	0.14
ENSMMUG00000003533	0	0	0	0	0	0	0	0	0	0	0	0	0	0	0	0	0	0	0	0	0	0	0	0	0	0	0	0	0	0	0	0	0.28	0.33	0.58	0.64	0.3	0.42	0.6	0.28	0.13	0.24	0.52	0.24	0.38	0.16	0.32	0.4	0.21
ENSMMUG00000003548	0	0	0.09	0.01	0	0.02	0.04	0.05	0	0.03	0.02	0	0	0.02	0.03	0.01	0	0	0	0	0.05	0	0	0	0.01	0.04	0	0	0	0	0	0.04	0.03	0.04	0.11	0	0.02	0.01	0.03	0.03	0	0.02	0	0.13	0.19	0	0.13	0	0
ENSMMUG00000003563	19.05	10.07	3.69	8.68	4.37	7.33	16.07	16.45	4.79	4.33	1.25	1.12	0.46	0.67	2.08	0.71	5.64	4.84	0.95	1.22	0.53	0.15	1.44	0.06	2.29	2.24	1.16	2.2	1.32	1.75	6.53	2.25	22.65	1.24	18.82	23.45	3.57	5.25	18.1	5.07	0	0.2	0.17	0.25	0	0.37	0.17	0.42	7.76
ENSMMUG00000003566	0.26	0.13	0.2	0.05	0.24	0.12	0.07	0.04	0.17	0.74	0.34	0.41	0.33	0.13	0.41	0.38	0.29	0.29	0.22	0.46	0.46	0.15	0.42	0.02	0.35	0.12	0.28	0.27	0.32	0.15	0.23	0.25	0.81	0.56	0.34	0.34	0.16	0.16	0.2	0.33	0.8	0.3	0.58	0.33	1.18	0.8	0.65	0.36	0.65
ENSMMUG00000003567	0.07	0.01	0.04	0.02	0.01	0.03	0.02	0.01	0.04	0.01	0.04	0.05	0.01	0.02	0.03	0.02	0.01	0.01	0	0.01	0	0	0	0.04	0.01	0.02	0.08	0.05	0.01	0.01	0.01	0	0.03	0.03	0.02	0.04	0.07	0.06	0.02	0.07	0.04	0.01	0.01	0.01	0.01	0.02	0.02	0.05	0.09
ENSMMUG00000003575	0.16	0.14	0.38	0.24	0.13	0.23	0.14	0.25	0.1	0.1	0.1	0.09	0.1	0.1	0.17	0.16	0.06	0.21	0.07	0.13	0.04	0.11	0.05	0.18	0.13	0.34	0.25	0.26	0.2	0.35	0.41	0.4	0.18	0.22	0.25	0.26	0.33	0.16	0.25	0.3	0.31	0.27	0.51	0.42	0.21	0.21	0.28	0.32	0.37
ENSMMUG00000003579	2.37	1.76	3.5	2.12	1.43	1.36	2.08	1.41	1.22	3.17	2.47	1.15	4.99	1.91	1.8	2.92	1.39	2.12	2.35	1.4	3.59	1.89	2.38	2.44	1.92	3	13.6	9.72	7.65	9.74	6.95	6.65	6.57	2.35	4.22	3.12	2.25	3.2	1.06	1.54	1.73	1.35	2.37	1.38	1.2	2.2	0.8	0.91	2.05
ENSMMUG00000003582	1.42	1.54	1.31	1.89	1.1	1.83	2.07	1.78	2.13	2.82	6.51	5.67	8.25	8.95	8.17	7.64	1.86	2.63	2.83	4.9	3.12	4.24	5.2	2.14	1.14	1.98	1.35	1.52	1.17	2.97	2.22	2.18	5.07	6.5	4.37	6.35	6.73	7.63	5.15	7.23	3.86	3.7	4.95	6.66	5.31	7.44	7.95	9.39	2.53
ENSMMUG00000003587	0.04	0.06	0.03	0.06	0.16	0.2	0.09	0.13	0.08	0.06	0.12	0.01	0.02	0.06	0.06	0.08	0.03	0.04	0.09	0.04	0.06	0.14	0.05	0.04	0.09	0.04	0.08	0.05	0.03	0.11	0.04	0.06	9.97	9.25	9.29	9.32	8.38	8.88	7.41	9.55	25.09	34.49	19.09	21.67	17.15	14.76	17.36	14.37	31.1
ENSMMUG00000003591	4.5	5.8	9.37	10.02	11.83	13	6.84	9.2	1.66	1.6	3.62	4.04	3.64	3.9	5.16	3.58	1.1	1.35	3.31	4.24	2.93	3.36	3.4	3.32	1.21	1.87	2.88	4.65	3.62	3.57	4.41	3.21	1.5	1.53	1.57	1.91	2.04	1.46	1.85	1.68	8.68	11.69	11.75	10.87	13.87	13.19	15.13	12.12	4.86
ENSMMUG00000003598	0.05	0.07	0.07	0.05	0.1	0.09	0.08	0.05	0.05	0.04	0.09	0.09	0.11	0.05	0.09	0.11	0.02	0.02	0.06	0.08	0	0.05	0.07	0.11	0.04	0.05	0.08	0.08	0.08	0.12	0.09	0.03	0.61	3	2	2.11	1.63	5.59	5.03	4.84	0.03	0.08	0.2	0.11	0.18	0.09	0.22	0.23	0.11
ENSMMUG00000003605	0	0	0	0	0.07	0	0	0	0.02	0	0	0.05	0.08	0	0	0	0	0	0	0.02	0.01	0.01	0	0	0	0	0.03	0.05	0.03	0	0	0	0	0	0	0.01	0.02	0	0	0	0.01	0	0	0	0.02	0	0	0	0
ENSMMUG00000003607	0.01	0	0	0	0	0.02	0	0	0.03	0.01	0.03	0.01	0	0.03	0	0.03	0	0.01	0.05	0	0.08	0.04	0.01	0.01	0.01	0.01	0.04	0.01	0.02	0.01	0.02	0	0.01	0.01	0.02	0.05	0.01	0	0.01	0.03	0	0.03	0.03	0.01	0.01	0.02	0.01	0.03	0
ENSMMUG00000003608	0.48	0.42	0.68	0.51	0.24	0.62	0.58	0.68	0.36	0.49	0.65	0.93	0.47	0.84	0.65	0.8	0.34	0.26	0.6	0.92	0.51	0.74	0.84	0.7	1.13	1.08	1.88	1.59	1.35	2.02	1.27	2.2	1.32	1.62	1.58	2.05	1.81	2.93	1.74	2.87	1.19	1.23	2.03	3.81	2.29	2.38	3.07	3.5	0.61
ENSMMUG00000003609	0.59	0.3	0.48	0.64	0.61	0.5	1	0.44	0.83	1.05	1.67	0.9	1.27	1.08	1.63	1.34	0.2	1.28	0.95	1.9	0.8	1.03	1.83	0.94	0.84	1.13	0.49	0.39	0.73	0.87	1.49	0.63	0.4	1.04	0.46	1.81	1.3	0.44	0.69	0.45	0.62	2.4	1.23	2.26	5.03	1.31	1.52	1.36	1.43
ENSMMUG00000003611	0.61	0.47	0.61	0.42	0.53	0.6	0.4	0.61	0.15	0.36	0.66	0.35	0.46	0.5	0.33	0.52	0.34	0.11	0.46	0.44	0.33	0.64	0.44	0.19	0.43	0.4	0.49	0.27	0.34	0.36	0.33	0.46	2.25	1.09	1.52	1.84	1.42	1.53	1.43	1.18	0.58	0.51	1.12	0.71	0.86	1.48	0.77	0.84	0.54
ENSMMUG00000003614	6.24	6.01	5.92	5.92	5.99	5.83	4.24	6.03	5.45	6.23	4.39	4.49	4.19	3.45	4.08	3.88	4.68	4.79	3.71	4.15	3.95	2.96	3.28	2.54	3.8	4.4	2.94	4.15	4.26	2.63	4.4	4.08	5.51	4.38	4.01	3.3	3.45	2.75	2.83	2.39	33.12	47.23	20.2	22.9	21.7	20.11	19.62	15.23	40.05
ENSMMUG00000003622	0.18	0.25	0.24	0.11	0.23	0.17	0.25	0.16	0.67	0.56	0.35	0.2	0.42	0.51	0.65	0.3	0.3	0.28	0.41	0.32	0.22	0.45	0.5	0.17	0.29	0.48	0.22	0.14	0.3	0.46	0.19	0.21	4.65	6.49	3.6	4.85	6.26	10.32	7.1	9.13	0.97	1.61	1.44	0.93	1.3	1.85	1.85	1.27	1.43
ENSMMUG00000003633	0.02	0.02	0.06	0.03	0.09	0.03	0.07	0.03	0	0.03	0.13	0.04	0.09	0.17	0.04	0.12	0.01	0.04	0.26	0.05	0.04	0.24	0.44	0.06	0.04	0.02	0.02	0.03	0.06	0.02	0.04	0.04	0.06	0.05	0.09	0.13	0.11	0.11	0.04	0.04	0.02	0.02	0.31	0.08	0.09	0.38	0.1	0.08	0.03
ENSMMUG00000003634	0.19	0.21	0.26	0.78	0.25	0.31	0.19	0.42	0.17	0.23	0.2	0.34	0.15	0.16	0.16	0.29	0.13	0.19	0.32	0.47	0.08	0.06	0.07	0.23	0.17	0.3	0.25	0.53	0.19	0.22	0.19	0.28	0.17	0.17	0.22	0.24	0.35	0.22	0.12	0.16	0.28	0.21	0.23	0.21	0.36	0.29	0.26	0.27	0.27
ENSMMUG00000003638	1.33	1	0.76	0.63	0.63	0.58	0.79	0.56	1.1	0.88	1.27	1.06	1.59	1.33	1.15	1.55	0.48	0.99	0.86	0.94	0.88	0.98	0.98	0.63	0.47	1.02	0.6	0.58	0.85	1.26	0.63	0.87	0.62	1.14	0.4	0.67	0.8	0.62	0.92	0.89	1.76	1.54	1.01	0.66	1.29	1.28	0.88	1.24	1.91
ENSMMUG00000003639	0.83	1.09	0.4	0.46	1.23	0.92	0.42	1.13	0.85	0.84	0.55	0.64	0.69	0.26	0.17	1.02	1.1	0.78	0.73	0.06	0.27	0.91	0.06	1.13	0.47	1.13	0.41	0.21	0.19	0.56	0.5	0.86	0.98	0.96	1.72	1.38	2.35	0.56	0.7	1.16	0.6	0.77	0.73	0.71	0.9	1.05	0.3	0.59	0.27
ENSMMUG00000003640	0	0.29	0.28	0.29	0.35	0.37	0.24	0.25	0.23	0.5	0.33	0.32	0	0.26	0.52	0.37	0.49	0.72	0.55	0.28	0.2	0.45	0	0	0.39	0	0.1	0.96	0	0.23	0	0.25	0.65	0.44	0.23	0.6	0.32	0.19	0.4	0.39	0.24	0.66	0.49	0	0.32	0.26	1.03	0.15	0
ENSMMUG00000003642	0.04	0.01	0.1	0.07	0.13	0.03	0.03	0.05	0	0.1	0.05	0.05	0.04	0	0.06	0.01	0	0.02	0.01	0.03	0.03	0	0.03	0.02	0	0.03	0	0.12	0	0	0.06	0	0.07	0.25	0.1	0.21	0.03	0.22	0.04	0.14	0.33	0.29	0.24	0.43	0.4	0.2	0.15	0.21	0.5
ENSMMUG00000003651	0.28	0.46	0.54	0.59	0.54	0.3	0.46	0.86	1.25	0.67	0.54	0.49	0.36	0.82	0.59	0.55	0.94	0.85	0.49	0.63	0.4	0.5	0.95	0.54	0.44	0.52	0.35	0.46	0.49	0.17	0.31	1.02	0.17	0.13	0.19	0.1	0.13	0.15	0.4	0.36	0.65	1.01	0.53	0.63	0.4	0.48	0.57	0.11	1.16
ENSMMUG00000003652	0.19	0.16	0.08	0.04	0.03	0.07	0.02	0.1	0.01	0.04	0	0.01	0	0	0	0	0.02	0.03	0.05	0.01	0.02	0.01	0	0.01	0.03	0.01	0.01	0.06	0.04	0	0.06	0.02	0.06	0.06	0.05	0.02	0	0.02	0.02	0.04	0.05	0.03	0.02	0	0.02	0	0.01	0.01	0.12
ENSMMUG00000003662	0.11	0.08	0.09	0.1	0.07	0.09	0.08	0.12	0.11	0.07	0.09	0.12	0.1	0.15	0.16	0.12	0.09	0.1	0.06	0.1	0.14	0.12	0.13	0.15	0.08	0.07	0.12	0.15	0.14	0.13	0.15	0.09	0.08	0.06	0.09	0.08	0.07	0.06	0.07	0.09	0.12	0.12	0.22	0.29	0.39	0.26	0.35	0.36	0.13
ENSMMUG00000003665	0.9	1.04	2.57	1.02	1.34	0.72	1.36	1.49	0.89	1.84	3.7	2.33	4.18	3.78	2.93	3.13	0.91	1.2	3.51	3.22	2.28	2.51	1.39	1.34	1.18	1.46	3.82	1.76	2.02	2.43	1.57	2.54	2.3	1.93	3.05	2.26	3.73	2.35	2.32	3.53	2.59	1.13	3.87	2.07	4.16	4.23	3.11	3.52	1.55
ENSMMUG00000003666	0.06	0.14	0.1	0.33	0.54	0.46	0.41	0.26	0.13	0	0.11	0.18	0.2	0.04	0.12	0.09	0.23	0.28	0.08	0	0	0.11	0	0.14	0.51	0.38	0.28	0	0.06	0.19	0.43	0.04	1.14	0.64	0.45	0.9	1.26	0.62	0.83	0.87	0.42	0.76	0.66	0.35	0.09	0.22	0.12	0.09	0.05
ENSMMUG00000003673	0.2	0.42	0.17	0.25	0.23	0.13	0.14	0.23	0.22	0.23	0.34	0.22	0.14	0.15	0.34	0.31	0.07	0.31	0.31	0.25	0.31	0.28	0.22	0.23	0.12	0.41	0.74	0.2	0.25	0.27	0.27	0.39	0.26	0.67	0.46	0.58	0.78	0.67	0.59	0.75	0.33	0.52	0.62	0.35	0.82	0.47	0.43	0.63	0.05
ENSMMUG00000003674	0.41	0.17	0.11	0.04	0.2	0.16	0.05	0.16	0.28	0.25	0.2	0.1	0.08	0.04	0.14	0.2	0.12	0.15	0.16	0.05	0.02	0.14	0.11	0.09	0.21	0.16	0.15	0.03	0.14	0.09	0.08	0.14	0.14	0.14	0.09	0.04	0.16	0.08	0.03	0.13	0.24	0.09	0.09	0.1	0.25	0.15	0.27	0.27	0.28
ENSMMUG00000003676	1.57	1.36	1.58	1.08	0.96	1.19	0.97	1.17	3.7	3.3	2.32	1.94	1.45	1.43	1.11	1.49	2.18	1.95	1.54	1.21	0.63	0.71	0.5	0.91	1.99	1.62	1.14	0.72	0.58	0.73	0.72	0.5	0.39	0.5	0.62	0.53	0.51	0.32	0.45	0.5	3.08	3.86	2.24	1.81	1.37	1.06	0.85	1.29	6.69
ENSMMUG00000003679	0	0	0	0	0	0	0	0	0	0	0	0	0	0	0	0	0	0	0	0	0	0	0	0	0	0	0	0	0	0	0	0	0.26	0.26	0.39	0.46	0.22	0.38	0.55	0.44	0.15	0.06	0.34	0.13	0.58	0.38	0.37	0.26	0.28
ENSMMUG00000003680	0	0	0	0	0	0	0	0	0	0	0	0	0	0	0	0	0	0	0	0	0	0	0	0	0	0	0	0	0	0	0	0	0.07	0.09	0.09	0.07	0.04	0.08	0.09	0.11	0.06	0.05	0.09	0.07	0.08	0.07	0.13	0.1	0.13
ENSMMUG00000003683	1.23	1.42	1.03	0.82	0.81	1.03	1.11	1.26	0.61	1.1	1.31	0.99	0.98	1.19	1.58	1.27	0.79	0.71	1.43	1.35	0.85	1.22	1.2	1.37	1.26	1.58	2.64	1.34	1.78	1.96	2.35	1.72	4.82	2.95	4.72	3.83	4.97	5.33	6.02	3.31	1.02	0.79	2.63	2.26	2.8	2.03	2.72	2.18	1.18
ENSMMUG00000003684	0.17	0.21	0.22	0.08	0.13	0.15	0.29	0.14	0.08	0.28	0.17	0.1	0.21	0.09	0.29	0.23	0.25	0.04	0.19	0.07	0.05	0.05	0.06	0.07	0.13	0.23	0.28	0.16	0.26	0.16	0.3	0.17	0.42	0.34	0.55	0.42	0.41	0.37	0.39	0.4	0.54	0.55	0.44	0.46	0.58	0.58	0.63	0.41	0.71
ENSMMUG00000003696	0.01	0.03	0.02	0.02	0	0.02	0.02	0.03	0.1	0.04	0.02	0.05	0.06	0.01	0.01	0.08	0.07	0.02	0.01	0.03	0.02	0.08	0	0.01	0.01	0.02	0.02	0.07	0	0.02	0.02	0.03	0.06	0.02	0.01	0.08	0.04	0.02	0.02	0.03	0.02	0.02	0.03	0.06	0.04	0.02	0.03	0.12	0.01
ENSMMUG00000003700	0.02	0.04	0.04	0.01	0.01	0.04	0.02	0.02	0.02	0.02	0	0.05	0.05	0.02	0.05	0.07	0.04	0.03	0.11	0.09	0.03	0.05	0.14	0.05	0.03	0.02	0.08	0.03	0.04	0.01	0.01	0.02	0.03	0.03	0.01	0.07	0.03	0.05	0.04	0.04	0.01	0.1	0.19	0.07	0.19	0.22	0.1	0.2	0.05
ENSMMUG00000003708	2.19	1.96	2.85	2.54	3	2.69	1.65	2.26	4.44	3.53	3.49	3.59	3.33	3.31	2.35	2.64	2.04	1.91	2.6	3.02	1.68	2.11	1.8	1.51	1.7	2.06	0.9	1.1	0.8	0.82	1.41	0.57	2.25	1.98	2.19	2.5	1.89	1.39	1.91	1.62	40.77	48.63	18.71	18.03	18.69	21.21	14.13	14.38	23.63
ENSMMUG00000003713	0.88	0.75	0.75	1.52	1.75	1.39	0.61	0.97	0.1	0.15	0.13	0.22	0.17	0.05	0.24	0.19	0.1	0.08	0.15	0.1	0.01	0.05	0.02	0.02	0.07	0.03	0.05	0.22	0.23	0.38	0.11	0.16	0.03	0.03	0	0.02	0	0.01	0.05	0	0.06	0.03	0.03	0.11	0.01	0.03	0.02	0.04	0.2
ENSMMUG00000003714	0.08	0.12	0.05	0.04	0.09	0.05	0.05	0.01	0.02	0.01	0.03	0.02	0.02	0.01	0.02	0	0.06	0.02	0	0	0.01	0	0.01	0.01	0.01	0.01	0.01	0.08	0.05	0	0.03	0.03	0.02	0.03	0.04	0.07	0.01	0	0.01	0.01	0.01	0.02	0.02	0.01	0	0	0.01	0.03	0.01
ENSMMUG00000003716	0.79	0.34	0.69	0.77	0.29	0.63	0.3	0.44	0.58	0.63	0.46	0.74	0.85	0.39	0.76	0.73	0.11	0.11	0.79	0.61	0.53	0.78	0.73	0.67	0.34	0.51	0.47	0.82	0.26	0.33	0.37	0.19	12.51	11.72	12.55	13.99	11.16	13.18	13.93	11.1	6.43	7.37	6.5	5.8	3.8	5.79	5.79	4.98	2.83
ENSMMUG00000003719	0.04	0.06	0.12	0.01	0.02	0.01	0	0.02	0.15	0.07	0.06	0.24	0.06	0.26	0.08	0.11	0.07	0.14	0.2	0.04	0.23	0.11	0.22	0.14	0.06	0.03	0.05	0.07	0.04	0.09	0.07	0.1	0.22	0.15	0.18	0.28	0.3	0.2	0.1	0.12	0.21	0.31	0.24	0.23	0.37	0.43	0.34	0.25	0.05
ENSMMUG00000003720	1.23	1.83	2.51	1.31	0.82	0.56	0.28	0.67	2.16	3.54	3.49	5.23	3.12	2.69	2.61	2.87	1.76	1.66	1.47	1.92	1.02	0.97	1.25	1.11	1.96	1.9	1.71	2.82	1.8	1.97	1.85	2.25	2.61	2.03	2.63	2.73	2.71	3.93	2.58	3.38	0.64	0.72	1.52	0.95	0.77	1.77	0.91	1.47	5.49
ENSMMUG00000003722	0.03	0.05	0.02	0.03	0.08	0.09	0.03	0	0.13	0.09	0.11	0.17	0.06	0.08	0.1	0.12	0.05	0.04	0.13	0.15	0.18	0.14	0.11	0.09	0.04	0.06	0.03	0.05	0	0	0.04	0	0.02	0.01	0.02	0.01	0.03	0.07	0.01	0	0.19	0.05	0.11	0.06	0.07	0.19	0.02	0.1	0.12
ENSMMUG00000003723	0	0	0	0	0.01	0.01	0.01	0.01	0.01	0.02	0	0	0	0.01	0.03	0.01	0	0.01	0	0.02	0	0.01	0.01	0.01	0.04	0.01	0	0.01	0	0.02	0	0	0.22	0.39	0.12	0.27	0.12	0.46	0.32	0.41	0.05	0.11	0.1	0.18	0.12	0.33	0.19	0.24	0.05
ENSMMUG00000003725	0.74	0.93	0.59	0.77	0.71	0.91	0.88	0.68	0.96	1.24	0.65	0.92	1.09	1.14	0.84	1.36	0.86	1.09	0.69	1.15	0.65	0.64	0.79	0.55	0.83	0.65	0.3	0.62	0.73	0.79	0.86	0.6	12.36	15.94	17.59	18.96	21.5	24.71	22.95	21.97	3.18	2.66	1.1	1.2	1.04	1.31	1.01	0.92	3.09
ENSMMUG00000003733	0.68	1.02	1.08	0.83	0.9	0.76	0.79	1	2.21	2.26	1.81	1.57	0.97	0.74	0.92	1.4	1.23	0.89	0.7	1.35	1.05	0.59	0.62	0.58	1.33	1.36	0.72	1.02	0.72	0.9	1.01	0.43	17.11	15.38	18.82	16.37	7.79	9.63	9.87	8.73	42.06	37.77	27.42	26.68	22.18	24.32	19.89	21.19	37.84
ENSMMUG00000003740	0	0.01	0	0.01	0	0.06	0.02	0	0.03	0	0	0.02	0.01	0	0.08	0.01	0	0	0	0.03	0	0.03	0	0	0.01	0	0.01	0	0.01	0.04	0.04	0.01	0.04	0.05	0.02	0.05	0	0.03	0.02	0.05	0.03	0.02	0.03	0.02	0.01	0	0	0	0.02
ENSMMUG00000003742	2.03	2.37	1.52	1.09	0.55	0.69	1.43	1.28	0.48	0.44	0.98	0.76	0.77	0.81	0.81	0.71	0.62	0.91	1.28	0.79	0.71	0.87	0.76	0.96	2.34	3.39	3.92	2.69	1.87	2.41	2.13	2	1.07	1.06	0.94	0.62	0.67	0.7	0.98	0.71	0.51	0.71	1.6	1.26	0.96	0.87	1.37	1.28	0.51
ENSMMUG00000003758	0	0.23	0.05	0	0.05	0.02	0	0.1	0	0.03	0.27	0.17	0.12	0	0	0.53	0	0	0	0.18	0.11	0.18	0	0.83	0.03	0.06	0.16	0	0	0.05	0	0.74	0	0.21	0.22	0	0	0	0.04	0.54	0.1	0.41	0.26	0.28	0.8	0.05	0.39	1.25	0.07
ENSMMUG00000003769	0.21	0.23	0.28	0.16	0.17	0.1	0.27	0.24	0.08	0.1	0.13	0.05	0.05	0.13	0.12	0.17	0.1	0.06	0.05	0.03	0.14	0.14	0.05	0.1	0.28	0.1	0.43	0.28	0.27	0.32	0.17	0.19	0.09	0.1	0.09	0.08	0.15	0.06	0.06	0.08	0.07	0.11	0.11	0.09	0.17	0.12	0.15	0.17	0.1
ENSMMUG00000003770	0.02	0.01	0.05	0.01	0.01	0.02	0.02	0.02	0	0.01	0	0	0.03	0	0.02	0	0	0	0	0	0.03	0.02	0.02	0.03	0.01	0.04	0.03	0.03	0.01	0.01	0.02	0.03	0.01	0.04	0.04	0.05	0.04	0	0.01	0.02	0.06	0.01	0.03	0.04	0	0	0.02	0.02	0.05
ENSMMUG00000003782	0.03	0.05	0.03	0.04	0.01	0.01	0.03	0.02	0.03	0.03	0.02	0	0.01	0.01	0.03	0.01	0.03	0.02	0.02	0	0.02	0.01	0	0	0.02	0.02	0.05	0.02	0.01	0.04	0	0.03	0.03	0.05	0.05	0.03	0.02	0.05	0.03	0.02	0.05	0.04	0	0.01	0	0	0.02	0.03	0.06
ENSMMUG00000003789	0	0.03	0.09	0.02	0.03	0.02	0.01	0.04	0.04	0.09	0.09	0.11	0.08	0.07	0.14	0.03	0.01	0.01	0.12	0.02	0.05	0.03	0.14	0.04	0.02	0.02	0.08	0.02	0.09	0.05	0.09	0.15	1.58	2.15	1.37	1.18	0.85	1.89	1.08	0.72	0.11	0.24	0.77	0.54	0.22	0.7	0.42	0.4	0.07
ENSMMUG00000003796	0	0	0.09	0	0.02	0	0.05	0	0.03	0	0.27	0.09	0.08	0.43	0.1	0.45	0	0	0.02	0.05	0.11	0.39	0	0.16	0	0	0.04	0	0	0	0	0	0	0.18	0.06	0.17	0	0.19	0.2	0.08	0	0.02	0	0.09	0	0.26	0.06	0	0.07
ENSMMUG00000003803	0.04	0.07	0.02	0.04	0	0.04	0	0.02	0	0.08	0.07	0.07	0.49	0.45	0.43	0.17	0.09	0.46	0.38	0.37	2.42	0.87	0.33	0.93	0.05	0	0.09	0	0.03	0.07	0.23	0	0	0	0	0	0	0	0	0	0.32	0.15	0.26	0.1	0.28	0.18	0.05	0.23	0.03
ENSMMUG00000003810	8.09	8.93	12.69	8.45	5.67	5.08	15.7	11.32	0.73	1.01	3.72	3.16	6.03	7.79	7.56	4.7	4.12	3.55	7.56	5.16	10.21	12.16	17.75	16.81	21.94	22.1	48.21	39.26	37.95	61.35	33.08	61.17	5.46	4.47	5.8	7.15	9.92	9.02	10.19	10.74	3.77	4.21	8.92	13.91	10.37	9.34	20.2	14.46	1.67
ENSMMUG00000003811	0.21	0.45	0.22	0.24	0.06	0.13	0.23	0.1	1.25	1.08	0.99	1.3	1.4	1.59	1.13	0.76	0.92	1.09	0.45	0.34	1.43	1.85	1.15	1.39	0.45	1.08	0.67	0.49	0.33	0.98	0.55	0.23	0	0.02	0.09	0	0	0.04	0	0	1.92	2.22	2.31	2.34	2.86	1.88	1.54	2.43	0.72
ENSMMUG00000003815	0.12	0.07	0.08	0.11	0.2	0.11	0.03	0.27	0.13	0.23	0.43	0.53	0.66	0.37	0.32	0.69	0.37	0.26	0.32	0.4	0.46	0.54	0.44	0.3	0.28	0.18	0.09	0.3	0.19	0.37	0.11	0.54	0.33	0.22	0.07	0.15	0.18	0.16	0.17	0.35	0.3	0.4	0.19	0.53	0.24	0.26	0.13	0.52	0.39
ENSMMUG00000003827	0.09	0.04	0.02	0.05	0.08	0.04	0.03	0.05	0.03	0.01	0.03	0.05	0.05	0.05	0.02	0.03	0.03	0.02	0.01	0.05	0.08	0.6	0	0.05	0	0.01	0.01	0.03	0.01	0.01	0.02	0.08	0.04	0.03	0.02	0	0.03	0.02	0.02	0.03	0	0.03	0.06	0.03	0.05	0	0.03	0.01	0.01
ENSMMUG00000003828	0.01	0	0	0	0.01	0	0.01	0	0	0	0	0	0	0	0.01	0	0.05	0	0.02	0	0.01	0.05	0.01	0	0	0	0	0.02	0	0	0	0	0	0.05	0.01	0.03	0.02	0.01	0	0	0	0	0.1	0.02	0	0	0	0	0
ENSMMUG00000003829	2.06	2.81	3.41	2.23	1.94	1.63	4.87	3.66	2.53	2.78	6.26	4.92	4.82	4.27	3.86	4.8	2.02	2.65	4.45	4.59	4.19	4.78	7.22	6.62	1.86	2.5	4.14	3.08	3.59	3.73	5.52	7.7	2.25	3.35	4.11	3.47	4.11	4.1	4.99	5.79	6.04	5.93	10.72	11.84	10.94	14.44	14.43	15.59	4.01
ENSMMUG00000003830	0	0.03	0.03	0.03	0.07	0.02	0.03	0.03	0.05	0.01	0.16	0.08	0.17	0.16	0.15	0.05	0.06	0.12	0.17	0.06	0.12	0.14	0.06	0.03	0.29	0.18	0.09	0.01	0.09	0	0.06	0.02	0.02	0.01	0.05	0.03	0.01	0.02	0.03	0	0.4	0.27	0.14	0.27	0.09	0.11	0.21	0.09	0.23
ENSMMUG00000003831	0	0	0.01	0	0	0.02	0.03	0	0	0.01	0.04	0	0.06	0.07	0.02	0	0	0.01	0.01	0.04	0.04	0.01	0.03	0	0.07	0.03	0.05	0.03	0	0	0	0	0.01	0.03	0.03	0.02	0.02	0.03	0.06	0	0.36	0.88	0.63	0.62	0.36	0.58	0.24	0.12	0.02
ENSMMUG00000003833	0	0.01	0.03	0	0.04	0.02	0.01	0.01	0.03	0.02	0	0.04	0.05	0.02	0	0.02	0.01	0.01	0.01	0.01	0.03	0.04	0.01	0	0.04	0	0.04	0.02	0.03	0.05	0	0	0.06	0.04	0.12	0.05	0	0.01	0.04	0.05	0.62	1.66	1	1.9	1.01	1.22	1.52	2.54	0.1
ENSMMUG00000003834	0.55	0.5	2.55	1.42	3.26	2.17	1.77	3.92	2.47	4.47	5.62	4.65	4.57	3.18	4.83	4.04	4.99	2.11	3.51	4.11	3.26	1.8	2.42	1.92	2.39	1.21	1.3	0.96	1.66	1.27	0.92	1.82	0.09	0.08	0.25	0.14	0.12	0.14	0.11	0.14	7.74	4.26	3.27	2.21	3.58	3.36	3.66	2.41	7.63
ENSMMUG00000003836	0.03	0.06	0.45	0.05	0.04	0.08	0.1	0.07	0.04	0.14	0.3	0.05	0.08	0.29	0.21	0.09	0.09	0.13	0.7	0.22	0.12	0.07	0.13	0.08	0.1	0.17	0.53	0.12	0.03	0.02	0.07	0.01	0.01	0.06	0.21	0.02	0.01	0.03	0.03	0.02	0.03	0.04	0.14	0.2	0.04	0.14	0.16	0.04	0.07
ENSMMUG00000003840	4.05	2.7	6.9	3.1	1.82	1.45	1.92	1.69	1.15	3.34	3.98	2.14	2.16	1.85	1.95	2.44	3.26	1.89	3.97	2.56	1.97	1.5	2.05	1.96	3.71	2.98	9.68	4.01	3.96	4.99	2.87	6.05	2.27	1.75	3.21	2.04	2.31	2.72	2.12	2.37	3.08	1.4	4.43	2.39	1.98	1.98	2.21	1.75	2.81
ENSMMUG00000003844	0.07	0.06	0.2	0.04	0.06	0.03	0.06	0.05	0.14	0.09	0.22	0.23	0.12	0.24	0.11	0.16	0.07	0.06	0.14	0.1	0.11	0.12	0.09	0.09	0.1	0.11	0.14	0.11	0.08	0.23	0.13	0.15	0.05	0.06	0.02	0.07	0.06	0.09	0.07	0.07	0.05	0.04	0.07	0.07	0.05	0.04	0.03	0.07	0.05
ENSMMUG00000003848	0.03	0.04	0.04	0.07	0.02	0.04	0.04	0.05	0	0.01	0.01	0.02	0.01	0.02	0.02	0	0	0	0	0.06	0	0	0	0	0.01	0.02	0.08	0.05	0.11	0.14	0.08	0.12	0.06	0.09	0.02	0.13	0.12	0.01	0.14	0.04	0.03	0.03	0.07	0.06	0.02	0.04	0.02	0.01	0
ENSMMUG00000003850	1.29	1.36	1.37	1.86	1.7	2.62	2.54	3.31	1.53	1.08	1.01	0.97	0.81	1	0.61	1	2.1	1.38	0.98	0.95	0.5	0.96	0.59	1.08	5.2	4.55	3.98	3.89	1.58	6.6	4.43	5.69	1.85	1.66	1.17	1.55	1.16	1.69	1.2	1.87	3.95	3.03	1.5	2.86	1.1	1.3	2.1	2.21	1.55
ENSMMUG00000003862	0.2	0.32	0.33	0.32	0.59	0.48	0.28	0.45	0.02	0.02	0.02	0.02	0.06	0.06	0.09	0.07	0.03	0.03	0.14	0.1	0.06	0.06	0	0.06	0.14	0.08	0.21	0.21	0.2	0.2	0.25	0.15	0.22	0.15	0.15	0.21	0.11	0.08	0.18	0.07	0.06	0.08	0.02	0.07	0.02	0.08	0.07	0.15	0.06
ENSMMUG00000003870	0.01	0	0.01	0.01	0.01	0.01	0	0.01	0.02	0.01	0.02	0.01	0.05	0.05	0.06	0.05	0.03	0	0.04	0	0.06	0.02	0.03	0.02	0.02	0.01	0.07	0.04	0.02	0	0.06	0.03	0.38	0.36	0.27	0.25	0.46	0.41	0.13	0.2	0.01	0.02	0.05	0.01	0.05	0.03	0.03	0.11	0.03
ENSMMUG00000003885	0	0	0	0	0	0	0	0	0	0	0	0	0	0	0	0	0	0	0	0	0	0	0	0	0	0	0	0	0	0	0	0	0	0.06	0	0.01	0	0.03	0	0.05	0.03	0.07	0	0.01	0.07	0.03	0.03	0	0.01
ENSMMUG00000003886	0.15	0.2	0.44	0.25	0.16	0.04	0.23	0.24	0.11	0.33	0.33	0.34	0.49	0.08	0.26	0.3	0.29	0.11	0.23	0.48	0.41	0.06	0.3	0.17	0.33	0.27	0.12	0.32	0.3	0.07	0.2	0.1	0.15	0.13	0.19	0.14	0.13	0.04	0.2	0.21	0.16	0.05	0.2	0.2	0.15	0.05	0.22	0.15	0.16
ENSMMUG00000003887	0.04	0.05	0.11	0.03	0.05	0.07	0.09	0.02	0.09	0.06	0.07	0.08	0.03	0.08	0.04	0.03	0.03	0	0.09	0.1	0.01	0.05	0.06	0.05	0.02	0.01	0.03	0	0.01	0.1	0.02	0.04	0.12	0.04	0.04	0.03	0	0.06	0.02	0.03	0.02	0.05	0.02	0.02	0.04	0.03	0.08	0.04	0.03
ENSMMUG00000003889	0	0	0	0	0	0	0	0	0	0	0	0	0	0	0	0	0	0	0	0	0	0	0	0	0	0	0	0	0	0	0	0	0.08	0.19	0.07	0.03	0.1	0.1	0	0.09	0.17	0.06	0.01	0	0.06	0.11	0	0	0.14
ENSMMUG00000003893	0.03	0.09	0.05	0.02	0.07	0.08	0.08	0.05	0.02	0.04	0.04	0.04	0.04	0.02	0.06	0.02	0.04	0	0.08	0.06	0.04	0.03	0.06	0.04	0.06	0.05	0.03	0	0	0	0.09	0.03	0.04	0.01	0.03	0.04	0.01	0.06	0.1	0.04	0.02	0.07	0	0.03	0.04	0.06	0.03	0.07	0.04
ENSMMUG00000003894	0	0	0	0	0	0	0	0	0	0	0	0	0	0	0	0	0	0	0	0	0	0	0	0	0	0	0	0	0	0	0	0	9.97	12.05	9.94	10.97	9.44	10.39	11.43	8.52	1.2	0.55	0.1	0.39	0.41	0.08	0.17	0.25	0.49
ENSMMUG00000003897	0.02	0.12	0.11	0.1	0.1	0.25	0.03	0.13	0.07	0.13	0.16	0.15	0.09	0.07	0.09	0.1	0.09	0.04	0.05	0.11	0.06	0.1	0.1	0.04	0.02	0.02	0.04	0.06	0.1	0.08	0.09	0.01	6.33	5.31	4.92	6.17	4.81	6.4	4.93	5.17	3.13	2.35	2.51	2.2	2.35	2.65	2.86	2.62	2.97
ENSMMUG00000003898	0.02	0.03	0.01	0.02	0.03	0.01	0.01	0.01	0.02	0.01	0	0	0.03	0	0.01	0.05	0.01	0.03	0.01	0.03	0	0	0.03	0	0.01	0.01	0.01	0.02	0.04	0	0	0	0.06	0.01	0.02	0.05	0.07	0	0.01	0.04	0.3	0.09	0.15	0.33	0.02	0.03	0.01	0.14	0.2
ENSMMUG00000003906	0.15	0.2	0.16	0.25	0.32	0.34	0.29	0.28	0.08	0.11	0.07	0.08	0.07	0.15	0.13	0.05	0.06	0.09	0.16	0.14	0.19	0.04	0.18	0.03	0.16	0.05	0.33	0.16	0.09	0.16	0.14	0.17	0.06	0.03	0.1	0.01	0.04	0.09	0.02	0.07	0.16	0.15	0.07	0.07	0.02	0.13	0.1	0.04	0.14
ENSMMUG00000003912	0	0	0.11	0.01	0.01	0	0.02	0	0.05	0.05	0.07	0.05	0.02	0.13	0.1	0.01	0.01	0	0	0.05	0	0	0.13	0.03	0.02	0.06	0.08	0.15	0.02	0.12	0.08	0	0	0	0.03	0.03	0	0	0	0.02	0.02	0.03	0.01	0.07	0	0.06	0.01	0	0.07
ENSMMUG00000003913	0.39	0.14	0.57	0.21	0.47	0.51	0.56	0.43	0.1	0.3	0.34	0.38	0.71	0.5	0.57	0.54	0.33	0.11	0.73	0.31	0.36	0.5	0.75	0.39	0.48	0.09	0.67	0.35	0.24	0.76	0.65	0.49	1.01	0.38	0.92	0.81	1.37	1.65	1.37	1.25	0.29	0.07	0.5	0.52	0.97	0.88	1.09	0.65	0.52
ENSMMUG00000003917	0.3	0.77	0.04	0.13	0.17	0.09	0.26	0.32	0	0	0	0	0	0	0	0	0	0	0.04	0.04	0.02	0	0	0	0.14	0.56	0.67	0.7	0.48	0.45	0	0.27	0	0.03	0	0	0	0	0.07	0	0.04	0.02	0.22	0	0.32	0.27	0.39	0.17	0
ENSMMUG00000003923	0	0.42	0.07	0.07	0.5	0.75	1.03	0.38	0.47	0.41	0.81	0.52	0.48	0.48	1.27	0.45	0.45	0.15	0.45	0	1.08	0.24	1.42	0.57	0	0.79	0	0.91	0	0.55	0.31	0.15	0.4	0.18	0.76	0.1	1.04	0.11	0.85	0.23	0.37	0.29	0.22	0.13	0.16	0.48	0.27	0.63	0.2
ENSMMUG00000003926	0.25	0.19	0.25	0.48	0.18	0.25	0.17	0.37	0.37	0.31	0.31	0.39	0.21	0.22	0.35	0.6	0.24	0.34	0.38	0.17	0.28	0.43	0.31	0.25	0.33	0.41	0.47	0.46	0.42	0.47	0.38	0.49	0.87	0.72	0.66	0.75	0.76	0.88	0.76	1.06	0.51	0.49	0.47	0.88	0.77	0.73	0.87	0.87	0.39
ENSMMUG00000003930	0.98	1.44	0.82	1.06	0.85	1.24	1.11	0.95	0.43	0.44	0.07	0.88	1	0.89	1.43	1.54	0.43	1.17	0.17	0.82	0.98	0.68	0.45	1.47	0.51	1.61	1	2.02	1.58	1.52	1.04	2.86	0.27	0.5	0.53	0.5	0.23	0.84	0.43	1.76	1.1	0.55	0.19	0.91	0.75	0.74	1.04	1.67	0.73
ENSMMUG00000003931	0.01	0.01	0	0.01	0.01	0.02	0.01	0.01	0	0	0.02	0.01	0.01	0.04	0	0.01	0.01	0	0.01	0.01	0	0	0	0	0	0	0.02	0	0.07	0.06	0	0.01	0.01	0.01	0.01	0.01	0	0.03	0	0	0	0	0	0.01	0.02	0	0	0.02	0.02
ENSMMUG00000003932	1.42	1.47	1.17	0.69	0.91	0.51	1	0.56	0.63	0.87	0.95	0.63	0.62	0.66	1.14	1.32	0.25	0.74	0.87	0.77	0.69	0.91	1.62	0.76	0.72	0.56	0.83	0.49	1.4	0.83	0.96	1.21	1.33	0.56	0.38	0.34	0.35	0.41	0.71	0.45	1.03	0.77	0.95	0.54	0.63	0.97	0.78	0.76	0.98
ENSMMUG00000003934	0.34	0.39	0.33	0.22	0.42	0.34	0.48	0.48	0.33	0.2	0.41	0.36	0.65	0.45	0.46	0.7	0.24	0.27	0.44	0.31	0.42	0.5	0.45	0.41	0.43	0.35	0.35	0.09	0.15	0.29	0.58	0.41	3.49	3.02	3.86	1.45	3.89	4.29	3.01	4.36	5.68	6.48	8.08	4.7	7.92	8	7.84	7.79	3.49
ENSMMUG00000003938	0.01	0	0	0.01	0	0	0.06	0	0.02	0.02	0.03	0	0.04	0.04	0.01	0.02	0.01	0	0.01	0	0	0.04	0	0	0.05	0	0	0	0	0	0	0.01	0.02	0.02	0.05	0.02	0.04	0.01	0	0	0	0.01	0.01	0.01	0.01	0	0	0	0.02
ENSMMUG00000003939	0.32	0.41	0.29	0.33	0.27	0.33	0.24	0.23	0.08	0.09	0.05	0.05	0.08	0.07	0.1	0.07	0.09	0.02	0.14	0.06	0.12	0.05	0.08	0.05	0.09	0.04	0.13	0.23	0.15	0.1	0.16	0.19	0.34	0.76	0.16	0.37	0.51	0.53	0.35	0.11	0.05	0.06	0.01	0.02	0.13	0.04	0.04	0.05	0.06
ENSMMUG00000003942	0.12	0.09	0.07	0.1	0.03	0.1	0.04	0.11	0.11	0.11	0.09	0.08	0.03	0.14	0.04	0.12	0.1	0.06	0.05	0.17	0.07	0.12	0.03	0.16	0.18	0.21	0.1	0.16	0.12	0.11	0.1	0.13	0.14	0.12	0.22	0.18	0.16	0.05	0.2	0.13	0.29	0.12	0.28	0.17	0.1	0.13	0.21	0.3	0.15
ENSMMUG00000003944	0.12	0.22	0	0.15	0.15	0.12	0	0.24	0	0.05	0.14	0	0.06	0.17	0	0.18	0	0	0	0.11	0	0	0	0	0.1	0.1	0	0	0	0	0.08	0	0.21	0	0.1	0.11	0.07	0	0	0.06	0.04	0	0	0.04	0.17	0	0.09	0	0.05
ENSMMUG00000003948	0.01	0.01	0	0	0.01	0.01	0	0.01	0.02	0	0	0	0.02	0.02	0	0.02	0.02	0.06	0.01	0	0.03	0.01	0	0.04	0.01	0.01	0.01	0.05	0.05	0.03	0.03	0.01	0.15	0.05	0.05	0.04	0.05	0.09	0.01	0.02	0	0	0.03	0.03	0.03	0	0	0.02	0.01
ENSMMUG00000003949	0.2	0.11	0.08	0.08	0.06	0.09	0.09	0.11	0.09	0.04	0.02	0.06	0.14	0.08	0.07	0.06	0.15	0.07	0.07	0.19	0.01	0.09	0.11	0.08	0.18	0.14	0.16	0.12	0.12	0.09	0.15	0.18	0.23	0.49	0.35	0.15	0.27	0.35	0.28	0.32	0.07	0.31	0.2	0.08	0.12	0.12	0.12	0.13	0.21
ENSMMUG00000003951	0	0	0	0	0	0	0	0	0	0	0	0	0	0	0	0	0	0	0	0	0	0	0	0	0	0	0	0	0	0	0	0	0.07	0.03	0.02	0.04	0.05	0	0.04	0.06	0.01	0.05	0	0.07	0	0	0.1	0.08	0
ENSMMUG00000003965	0	0	0	0	0.01	0	0	0	0	0	0	0	0	0	0.03	0	0	0.09	0	0	0	0.01	0	0	0	0	0	0	0.03	0.06	0	0	0.02	0.01	0.01	0.02	0.04	0	0	0	0	0	0	0	0	0	0.01	0.08	0.01
ENSMMUG00000003970	0.07	0.19	0.13	0.06	0.07	0.07	0.18	0.07	0.08	0.05	0.15	0.13	0.08	0.09	0.35	0.14	0.01	0	0.25	0.06	0.15	0.15	0.18	0.01	0.24	0.12	0.44	0.44	0.32	0.45	0.2	0.16	0.07	0.09	0.08	0.12	0.14	0.11	0.07	0.16	0.17	0.07	0.01	0.12	0.11	0.16	0.32	0.15	0.07
ENSMMUG00000003971	0.04	0.07	0.02	0.07	0.03	0.02	0.02	0.03	0.02	0.03	0.03	0.05	0.04	0.06	0.06	0.04	0.02	0.01	0.02	0.08	0	0.01	0.01	0.02	0.05	0.02	0.05	0.01	0.03	0.09	0.05	0.04	3.59	3.7	3.01	3.98	3.77	5.14	4.54	3.68	0.05	0.05	0.09	0.08	0.1	0.05	0.23	0.09	0.01
ENSMMUG00000003974	0.29	0.32	0.31	0.33	0.39	0.38	0.4	0.46	0.15	0.16	0.35	0.3	0.35	0.36	0.35	0.57	0.11	0.12	0.29	0.17	0.24	0.28	0.21	0.29	0.12	0.21	0.24	0.25	0.29	0.34	0.34	0.24	13.76	15.09	13.49	13.39	13.95	13.52	15.28	13.31	2.01	1.79	4.47	2.87	5.32	5.89	5.2	4.99	1.34
ENSMMUG00000003976	0	0	0.02	0	0	0	0	0	0.09	0.03	0.25	0.24	0.34	0.15	0.07	0.21	0	0	0.19	0.04	0.03	0.05	0.27	0	0.03	0	0	0.08	0.04	0.04	0	0	0.44	0.26	0.09	0	0.08	0.07	0.5	0.21	0	0.09	0	0.15	0.05	0.05	0	0.49	0
ENSMMUG00000003981	13.57	17.84	17.12	13.14	8.58	8.7	20.52	16.29	6.65	7.2	8.93	8.21	8.99	10.98	10.81	9.78	9.99	10.03	12.38	10.51	14.33	14.31	19.23	15.18	36.66	42.68	42.04	38.89	34.88	60.66	39.65	44.72	21.07	19.81	15.32	17.06	18.58	23.93	22.95	22.69	20.53	16.84	20.48	29.42	23.72	21.16	37.92	28.78	14.06
ENSMMUG00000003985	0.15	0.38	0.29	0.32	0.28	0.27	0.69	0.45	0.37	0.1	0.3	0.13	0.66	0.31	0.48	0.44	0.07	0.24	0.29	0.11	0.24	0.41	0.55	0.58	0.31	0.76	0.12	0.17	0.07	0.71	0.45	1.21	0.39	1.21	0.12	0.58	0.41	1.33	1.73	0.91	0.09	1.35	0.72	0.39	1.29	1.45	1.83	1.25	0.47
ENSMMUG00000003987	1.05	2	0.61	0.7	0.41	0.36	1.12	0.8	0.27	0.19	0.41	0.27	0.26	0.34	0.39	0.39	0.17	0.15	0.37	0.29	0.29	0.31	0.47	0.23	0.91	1.42	3.8	2.29	2.74	2.76	2.4	2.75	0.25	0.24	0.28	0.14	0.26	0.21	0.23	0.23	0.18	0.2	0.15	0.29	0.26	0.22	0.38	0.42	0.15
ENSMMUG00000003990	0.21	0.32	0.43	0.45	0.25	0.14	0.37	0.35	0.28	0.27	0.11	0.28	0.19	0.26	0.08	0.37	0.06	0	0.18	0.26	0.02	0.32	0.08	0.52	0.36	0	0.1	0.21	0.12	0.04	0.41	0.08	0.43	0.26	0.73	0.39	0.43	0.49	0.39	0.44	0.34	0.62	0.48	0.49	0.48	0.09	0.26	0.54	0.35
ENSMMUG00000003999	0.21	0.05	0.16	0.14	0.17	0.16	0.27	0.39	0.04	0.14	0.05	0.07	0.26	0.12	0.1	0.2	0.1	0.06	0.43	0.13	0.06	0.2	0.22	0.09	0.06	0.06	0.48	0.4	0.13	0.58	0.12	0.26	4.2	3.67	3.59	4.03	3.1	3.32	2.71	3.67	0.93	1.07	2.1	1.34	1.79	1.51	1.51	2.05	1.13
ENSMMUG00000004000	0.76	0.73	0.78	0.51	0.59	0.71	1.16	0.72	6.24	7.9	5.2	4.81	2.92	6.31	4.06	2.64	4.97	3.79	2.99	5.18	2.03	4.7	3.09	1.49	2.71	1.97	0.62	0.22	0.89	2.02	1.83	1.41	4.63	7.48	4.93	6.27	6.61	7.42	4.72	5.4	7.23	4.22	1.26	1.92	2.16	2.59	2.85	2.33	6.55
ENSMMUG00000004001	1.62	1.93	2.77	1.89	1.67	1.11	2.34	1.94	1.28	2.78	7.38	4.36	5.49	7.98	5.86	4.75	4.21	4.02	14.87	7.22	9.73	11.56	17.7	12.47	2.94	2.21	3.26	2.65	3.23	2.09	3.57	3.65	27.28	29.96	36.54	29.57	42.43	48.18	40.67	47.36	9.74	6.23	17.42	12.37	13.37	16.81	17.06	20.32	3.36
ENSMMUG00000004004	6.97	7.04	10.1	7.08	8.13	7.72	7	10.22	7.35	6.68	7.96	9.62	8.03	7.52	7.62	8.75	6.24	5.53	10.22	9.69	8.44	7.89	6.88	9.55	6.83	6.67	6.09	6.27	6.36	6.74	6.75	7.29	13.81	12.06	19.05	15.24	14.35	11.94	12.27	15.11	3.03	4.13	7.83	8.9	6.83	6.97	9.41	8.06	6.9
ENSMMUG00000004006	0	0	0	0	0	0	0	0	0	0	0	0	0	0	0	0	0	0	0	0	0	0	0	0	0	0	0	0	0	0	0	0	0.03	0.01	0.04	0.01	0.01	0.03	0.02	0.02	0	0.01	0	0	0.04	0.02	0.02	0.01	0.03
ENSMMUG00000004010	0.01	0.02	0.01	0	0.02	0	0	0.03	0.02	0.02	0	0	0.02	0	0.01	0	0.05	0.03	0.01	0.01	0.01	0	0	0	0	0.01	0	0.02	0.01	0.01	0.03	0	0.06	0.04	0.04	0.03	0.01	0.01	0.02	0.01	0.08	0.03	0.02	0.05	0.05	0.02	0.06	0.07	0.09
ENSMMUG00000004014	0.35	0.3	0.17	0.18	0.1	0.08	0.08	0.17	0.2	0.29	0.31	0.28	0.17	0.14	0.19	0.27	0.16	0.3	0.2	0.22	0.32	0.16	0.21	0.22	0.24	0.23	0.16	0.35	0.07	0.08	0.17	0.12	0.47	0.34	0.49	0.64	0.18	0.24	0.13	0.19	0.21	0.44	0.11	0.23	0.28	0.35	0.15	0.31	0.25
ENSMMUG00000004015	0.34	0.2	0.66	0.28	0.17	0.14	0.13	0.18	0.14	0.25	0.55	0.36	0.26	0.14	0.26	0.42	0.28	0.22	0.59	0.47	0.18	0.28	0.32	0.27	0.38	0.41	0.48	0.32	0.19	0.75	0.32	0.69	2.83	3.41	2.1	1.62	2.09	2.13	2.63	2.62	3.55	3.9	2.54	2.2	2.5	4.2	5.15	3.72	3.57
ENSMMUG00000004019	0.05	0.14	0.13	0.12	0.09	0.1	0.17	0.1	0.12	0.07	0.14	0.22	0.32	0.28	0.18	0.2	0.11	0.12	0.16	0.14	0.17	0.29	0.16	0.32	0.12	0.19	0.32	0.21	0.2	0.36	0.42	0.18	5.04	4.46	7.37	6.88	6.22	9.2	8.25	8.32	1.38	1.11	2.09	1.35	1.84	1.46	2.28	2.24	0.56
ENSMMUG00000004020	0.02	0.01	0.09	0.05	0.02	0.02	0.02	0.07	0.13	0.23	0.21	0.11	0.31	0	0.35	0.17	0	0	0.25	0.06	0.08	0.08	0.35	0.14	0.07	0.03	0.14	0.23	0.21	0.07	0.05	0.14	1.44	1.93	1.85	2.16	2.33	2.67	3.16	2.5	0.13	0.1	0.18	0.13	0.02	0.04	0.09	0.28	0.22
ENSMMUG00000004026	0.55	0.78	0.38	0.28	0.37	0.24	0.34	0.37	0.74	0.73	0.84	0.8	1.29	0.71	0.57	0.87	0.93	0.68	0.4	0.54	0.87	0.71	0.73	0.83	0.73	0.52	0.42	0.28	0.5	0.2	0.44	0.4	12.44	11.39	5.84	4.94	9.92	9.27	9.09	15.27	2.39	2.53	3.32	3.3	4.43	5.3	2.82	2.51	1.5
ENSMMUG00000004029	0.19	0.09	0.23	0.38	0.36	0.16	0.3	0.25	0.14	0.22	0.26	0.19	0.31	0.14	0.38	0.27	0.2	0.18	0.17	0.32	0.29	0.18	0.35	0.2	0.23	0.13	0.15	0.38	0.45	0.43	0.46	0.35	0.76	1.22	1.07	0.91	2.08	1.02	1.2	1.04	1.04	0.55	0.89	1.03	1.58	1.83	1.47	1.85	0.88
ENSMMUG00000004036	0.07	0.06	0.14	0.06	0.06	0.21	0.46	0.02	0.21	0.23	0.11	0.07	0.03	0.18	0.15	0.35	0	0.04	0	0.06	0.09	0	0	0.6	0.05	0	0.21	0	0.36	0.08	0.3	0.04	0	0.05	0	0.03	0	0.06	0.38	0.07	0.36	0.02	0	0	0	0.11	0	0.02	0.08
ENSMMUG00000004037	0.07	0.14	0.12	0.05	0.08	0.01	0.05	0.27	0.03	0.1	0.05	0.01	0.14	0.02	0.03	0.25	0.03	0.03	0.1	0.07	0.07	0.02	0.01	0.03	0.14	0	0.09	0.05	0.06	0.08	0.05	0	0	0.08	0.1	0.09	0.04	0.01	0.06	0.09	0.04	0.04	0.01	0.1	0.13	0.02	0	0.2	0.07
ENSMMUG00000004039	0.17	0.26	0.18	0.22	0.44	0.43	0.17	0.24	0.36	0.26	0.62	0.37	0.48	0.56	0.49	0.55	0.24	0.23	0.48	0.15	0.42	0.33	0.25	0.53	0.1	0.17	0.18	0.04	0.11	0.29	0.24	0.12	0.34	0.3	0.24	0.19	0.79	0.6	0.3	0.51	0.42	0.27	0.64	0.36	0.55	0.3	0.68	0.63	0.34
ENSMMUG00000004042	0	0	0	0	0	0	0	0	0	0	0	0	0	0	0	0	0	0	0	0	0	0	0	0	0	0	0	0	0	0	0	0	0	0.01	0.04	0.05	0	0.02	0.01	0	0.05	0	0.01	0.03	0	0.02	0	0	0.03
ENSMMUG00000004046	2.34	2.01	3.19	1.87	1.07	1.51	4.99	5.23	0.27	0.42	0.73	0.68	1.01	1.7	1.36	2.21	0.73	0.93	1.83	0.59	0.77	1.6	3.12	4.2	4.67	4.99	8.16	4.93	4.73	12.31	8.52	14.77	2.96	1.47	2.21	3.82	2.6	3.07	2.88	3.79	0.66	0.86	1.66	2.03	1.02	2.34	3.75	4.75	0.33
ENSMMUG00000004051	1.3	1.68	2.58	1.34	1.39	1.32	2.28	1.73	0.33	0.44	0.96	0.67	0.77	1.4	1.01	0.47	0.32	0.29	0.88	0.81	0.94	1.24	1.12	0.79	1.19	1.96	4.5	3.21	2.77	5.2	3.33	3.23	1.63	1.61	2.15	1.6	1.44	1.69	2.24	1.85	0.63	1.05	1.46	1.68	1.62	1.41	2.12	1.33	0.85
ENSMMUG00000004055	0.22	0.14	0.65	0.23	0.17	0.18	0.4	0.25	0.24	0.19	0.3	0.2	0.32	0.16	0.28	0.1	0.16	0.15	0.42	0.16	0.12	0.23	0.42	0.2	0.24	0.41	0.65	0.57	0.33	0.76	0.43	0.51	2.69	1.87	0.86	1.42	0.71	0.84	0.63	0.82	0.34	0.27	0.54	0.25	0.24	0.19	0.54	0.28	0.27
ENSMMUG00000004056	0.31	0.21	0.45	0.14	0.11	0.19	0.18	0.22	0.59	0.52	0.74	0.64	0.69	0.83	0.81	0.43	0.3	0.37	0.44	0.58	0.33	0.49	0.49	0.37	0.44	0.27	0.34	0.24	0.23	0.7	0.31	0.24	0.24	0.2	0.11	0.17	0.04	0.05	0.06	0.06	0.55	0.63	0.89	0.99	0.94	1.16	0.73	0.58	0.64
ENSMMUG00000004057	0.05	0	0	0	0	0	0	0	0	0	0.05	0	0	0	0	0	0	0	0	0	0	0	0	0	0	0	0	0	0	0	0	0.1	0	0	0.03	0	0	0	0.08	0.24	0	0	0	0.05	0	0	0	0	0
ENSMMUG00000004069	0	0.04	0	0	0	0	0	0	0	0	0	0	0.02	0	0	0	0	0.02	0	0	0	0	0	0	0	0	0.08	0.04	0.02	0.02	0.05	0	0.04	0.17	0.4	0.19	0.06	0.23	0.2	0.26	0.01	0	0.01	0	0	0	0	0	0
ENSMMUG00000004072	0.75	0.71	0.89	0.78	0.5	0.51	0.38	0.36	0.57	0.77	0.77	0.47	0.44	0.63	0.27	0.56	0.79	1.27	0.6	0.79	0.92	0.66	0.92	0.55	0.85	1.45	2.19	1.21	1.87	2.1	1.12	1.24	2.12	2.52	2.53	1.73	1.14	1.23	1.7	1.77	1	0.8	0.71	0.64	0.66	1.25	0.45	0.37	1.23
ENSMMUG00000004083	0.68	0.7	0.71	0.44	0.37	0.31	0.37	0.27	1.15	1.7	0.73	0.89	0.55	0.39	0.59	0.5	1.07	0.57	0.38	0.63	0.42	0.42	0.35	0.3	1.19	0.9	0.56	0.86	0.44	0.5	0.48	0.55	4.17	3.06	2.26	2.15	2.45	2.28	2.02	1.86	4.23	4.77	3.52	2.66	2.13	2.16	2.93	2.44	7.03
ENSMMUG00000004084	0.31	0.12	0.2	0.3	0.24	0.3	0.12	0.1	0.18	0.29	0.21	0.51	0.29	0.39	0.27	0.22	0.21	0.15	0.34	0.05	0.03	0.17	0.36	0.11	0.11	0.22	0.25	0.24	0.18	0.14	0.05	0.08	2.35	2.63	2.61	3.07	2.25	3.1	2.67	2.5	1.23	1.7	2.67	2.39	1.8	2.34	2.23	1.94	1.98
ENSMMUG00000004088	0.88	0.64	0.83	1.08	0.89	0.89	0.81	0.93	0.55	0.44	0.9	1.06	1.11	0.98	0.68	1.08	0.57	0.35	0.62	0.63	0.41	0.59	0.57	0.43	0.27	0.29	0.44	0.62	0.82	0.56	0.63	0.96	0.3	0.19	0.21	0.3	0.29	0.35	0.43	0.16	1	0.73	0.31	0.47	0.78	0.6	0.46	0.45	1.38
ENSMMUG00000004092	0.35	0.31	0.26	0.22	0.2	0.16	0.19	0.2	0.69	0.89	1.41	1.16	1.78	1.2	1.16	0.81	1.21	0.85	0.77	0.77	1	1.2	1.08	0.94	0.49	0.35	0.22	0.27	0.5	0.43	0.41	0.28	0.23	0.24	0.11	0.12	0.25	0.2	0.29	0.17	1	0.85	1.34	1.01	1.6	1.33	1.86	1.17	1.42
ENSMMUG00000004100	0.14	0.06	0.16	0.1	0.03	0.24	0.1	0.14	0.17	0.05	0	0.18	0.22	0.07	0.14	0.31	0.03	0.2	0.1	0.09	0.11	0	0.06	0.04	0.22	0.22	0.11	0.12	0.05	0.19	0.07	0	2.31	1.91	1.93	3.52	2.47	3.45	2.77	1.6	0.07	0.12	0.63	0.3	0.57	0.45	0.33	0.41	0.34
ENSMMUG00000004106	0	0	0	0	0	0	0	0	0	0	0	0	0	0	0	0	0	0	0	0	0	0	0	0	0	0	0	0	0	0	0	0	0	0	0.04	0	0	0	0.03	0.06	0.05	0	0	0	0	0.01	0.02	0.06	0.01
ENSMMUG00000004107	0.45	0.61	0.47	0.49	0.37	0.57	0.52	0.4	0.35	0.16	0.37	0.23	0.26	0.38	0.25	0.18	0.42	0.24	0.48	0.24	0.04	0.35	0.27	0.28	0.49	0.33	0.22	0.32	0.19	0.52	0.31	0.2	0.73	0.82	0.84	0.47	0.72	0.73	0.83	0.95	0.32	0.26	0.42	0.36	0.68	0.94	0.61	0.45	0.3
ENSMMUG00000004109	3.14	2.57	3.42	2.43	1.61	1.74	2.56	4.04	1.45	1.17	4.31	3.78	4.23	6.39	5.09	6.16	1.53	1.53	3.72	2.27	3.84	5.11	7.7	4.87	3.04	2.42	5.64	3.76	4.01	5.83	4.89	7.04	5.74	5.12	7.71	6.11	8.31	12.11	9.08	8.74	2.27	2.29	5.09	7.09	5.2	5.73	8.99	7.57	1.85
ENSMMUG00000004111	0.72	0.85	0.86	0.93	0.84	1.11	1.11	1.48	1.44	1.47	2.07	1.91	2.06	2.67	2.99	3.51	0.54	0.78	1.68	1.94	0.97	1.46	1.24	0.94	0.52	0.71	0.6	0.56	0.54	0.76	0.89	0.56	2.38	0.33	0.3	0.17	1.33	0.38	0.33	0.57	2.05	2.4	1.93	1.76	2.04	1.75	1.9	1.59	1.2
ENSMMUG00000004116	0.79	0.79	1.51	1.21	0.82	0.77	1.63	1.73	0.23	0.25	0.44	0.36	0.48	0.8	0.62	0.7	0.5	0.32	0.97	0.62	0.9	1.5	1.2	1.17	2	1.99	4.39	3.08	3.27	5.04	3.71	4.99	0.8	0.61	0.95	1.39	1.45	1.43	1.36	1.51	0.29	0.25	1.03	1.66	0.76	0.61	1.8	1.2	0.26
ENSMMUG00000004117	0.03	0.01	0.05	0.01	0.02	0.03	0	0	0.04	0.02	0.06	0.05	0.03	0.01	0.01	0.02	0.08	0.09	0.02	0.06	0.04	0	0	0.01	0.03	0.04	0.05	0.04	0.01	0.01	0.03	0.01	0.32	0.21	0.16	0.17	0.2	0.05	0.06	0.09	0.07	0.06	0.04	0.04	0.02	0.01	0.04	0.03	0.11
ENSMMUG00000004123	0.86	0.77	0.87	0.55	0.57	0.35	0.46	0.61	0.3	0.48	0	0.2	0	0	0.17	0.36	0	0.34	0.82	0.33	0.52	0.87	0.67	0.64	0.45	0	0.98	1.02	0.72	1.08	1.21	0	2.09	1.13	2.41	1.82	1.44	1.08	0.96	1.85	0.8	0.57	1.06	1.06	1.12	0.88	0.99	0.31	0.16
ENSMMUG00000004124	35.9	29.97	130.96	33.32	14.71	27.24	30.8	32.29	16.85	29.22	126.29	44.15	45.19	61.68	59.28	63.81	35.54	31.44	133.43	47.63	50.72	72.92	78.52	61	36.73	33.93	201.17	46.37	29.88	71.44	46.93	65	34.7	37.65	122.54	44.42	25.41	72.05	52.37	48.3	35.25	23.21	119.28	34.41	37.86	62.14	37.88	43.35	31.16
ENSMMUG00000004135	0	0.03	0.03	0.12	0	0	0.04	0.02	0.18	0.15	0.1	0.13	0.23	0.12	0	0.08	0.11	0.48	0.24	0.03	0.16	0	0.07	0.14	0	0.43	0.06	0.25	0.11	0	0.07	0	0.19	0.37	0.23	0.1	0.16	0.03	0.04	0.2	0.22	0.19	0.25	0.13	0.09	0.04	0.22	0.11	0.13
ENSMMUG00000004136	0.05	0.04	0.18	0.18	0.04	0.22	0.13	0.07	0.03	0.09	0.12	0.11	0.31	0.14	0.34	0.23	0	0.06	0.09	0.06	0.1	0.12	0.21	0.19	0.08	0.03	0	0.08	0	0	0	0	0.19	0.52	0.28	0.43	0.19	0.15	0.21	0.03	0.43	1.05	0.55	1.21	1.84	0.31	0.99	1.11	1.08
ENSMMUG00000004147	0.07	0.01	0.04	0	0	0.02	0.05	0	0.16	0.09	0.01	0.07	0.01	0	0.06	0.04	0.06	0.14	0.04	0.1	0.07	0	0.02	0	0.07	0.12	0.04	0.04	0.06	0.09	0.03	0.03	0.42	0.3	0.3	0.36	0.27	0.02	0.35	0.27	2.04	1.74	0.18	0.51	0.11	0.3	0.41	0.03	1.98
ENSMMUG00000004148	1.51	1.36	2.54	1.4	1.32	2.19	1.58	1.4	7.11	7.96	9.46	8.72	8.29	9.67	8.15	8.11	7.47	7.58	5.81	6.69	6.19	7.97	7.9	7.67	6.19	4.97	3.01	2.25	1.58	3	2.41	2.07	0.51	0.76	0.62	0.85	0.77	0.68	0.9	1.04	14.43	13.82	12.3	11.71	11.23	15.79	11.69	15.14	8.27
ENSMMUG00000004162	0.1	0.14	0.14	0.18	0.06	0.29	0.16	0.36	0.18	0.1	0.13	0.03	0.09	0.19	0.23	0.12	0.06	0.26	0.2	0.31	0.16	0.22	0.11	0.05	0.14	0.12	0.16	0.25	0.05	0.13	0.15	0.14	0.1	0.2	0.13	0.16	0.14	0.18	0.16	0.11	0.04	0.07	0.17	0.07	0.38	0.2	0.06	0.12	0.05
ENSMMUG00000004164	0.02	0.02	0	0.01	0	0	0.01	0.02	0.04	0	0.03	0.04	0.01	0.03	0.03	0.04	0.06	0.09	0	0.01	0.02	0.05	0	0.07	0.01	0.01	0.01	0.03	0	0.01	0.05	0.01	0.03	0.06	0.02	0.08	0.07	0.05	0.02	0.03	0.02	0.06	0.06	0.03	0	0.06	0.09	0.04	0.05
ENSMMUG00000004166	0.02	0	0.04	0.01	0.1	0.06	0.02	0.05	0.02	0	0	0.04	0	0.05	0.02	0	0	0	0	0.01	0.2	0	0	0	0.05	0.03	0.02	0	0.07	0	0.12	0.02	0.04	0	0.15	0.07	0	0.07	0.06	0.04	0	0	0	0	0.01	0.05	0.01	0	0
ENSMMUG00000004168	0.6	0.65	1.08	1.08	0.72	1	0.51	1.01	0.9	0.74	1.16	2.44	2.23	2.83	2.63	3.13	0.71	0.69	1.27	2.17	1.75	1.97	2.98	2.45	0.81	0.78	0.77	0.98	0.81	1.57	1.1	0.96	0.09	0.11	0.06	0.66	0.03	0.1	0.23	0.16	1.49	2.56	3.05	3.17	4.23	3.49	4.19	3.86	0.84
ENSMMUG00000004169	0.21	0.27	0.33	0.34	0.14	0.13	0.22	0.22	0.15	0.13	0.06	0.06	0.11	0.11	0.09	0.1	0.19	0.13	0.08	0.27	0.15	0.19	0.16	0.07	0.21	0.18	0.27	0.28	0.34	0.12	0.34	0.31	0.34	0.3	0.34	0.34	0.28	0.19	0.18	0.29	0.37	0.2	0.1	0.18	0.56	0.05	0.2	0.19	0.21
ENSMMUG00000004173	58.03	43.77	34.58	48.07	48.68	40.22	41.53	49.59	32.49	53.79	42.71	58.99	83.35	77.78	87.8	79.52	46.92	35.6	34.28	65.65	73.28	60.8	84.18	59.73	35.04	25.72	26.34	50.67	70.1	61.49	52.18	53.25	22.17	12.4	18.14	28.08	25.76	34.52	32.82	21.41	47.85	29.34	29.64	41.38	60.97	52.29	54.25	51.8	50.08
ENSMMUG00000004176	0	0.01	0	0.02	0.02	0	0	0	0	0.04	0	0.05	0.02	0	0	0.02	0	0	0.01	0.01	0	0	0	0.01	0	0	0.02	0.07	0.05	0	0.01	0	0	0.04	0.03	0.15	0.09	0.02	0	0.01	0.01	0.02	0	0.02	0.02	0	0	0	0.02
ENSMMUG00000004178	0.02	0.03	0.03	0.03	0.01	0.12	0.05	0.03	0.01	0.04	0.02	0.01	0.07	0.1	0.04	0.07	0	0	0.01	0	0	0.01	0.03	0.04	0.08	0.01	0.02	0	0.01	0	0.06	0.02	0.34	0.21	0.16	0.14	0.07	0.14	0.06	0.13	0	0	0.01	0	0.07	0.07	0.06	0.01	0.06
ENSMMUG00000004181	0.46	1.52	0.24	0.45	0.37	1.5	0.71	0.78	0.88	0.25	0.11	0.64	0.16	0.57	0.44	0.67	0.29	1.24	0.21	0.66	0.4	0.91	0.54	0.78	0.49	1.26	0.24	0.93	0.67	1.6	0.66	0.77	1.55	3.7	1.49	1.8	0.91	3.74	2.27	1.84	0.8	2.06	0.42	1.14	0.93	1.73	1.09	1.15	0.71
ENSMMUG00000004182	0.02	0.05	0.05	0.13	0.1	0.19	0.09	0.13	0.16	0.02	0.27	0.02	0.04	0.1	0.08	0.21	0.13	0.05	0.16	0.15	0	0.19	0.03	0	0.24	0.22	0.1	0.08	0	0.24	0.1	0.14	0.15	0.16	0.12	0.13	0.1	0.07	0.1	0.09	0.13	0.23	0.14	0.01	0.21	0.19	0.13	0.03	0.06
ENSMMUG00000004184	0.01	0.03	0.02	0.06	0.02	0.05	0.04	0	0.04	0.02	0	0.01	0.02	0	0.01	0.09	0.02	0.01	0.02	0.01	0.11	0	0	0.01	0.01	0.05	0	0.03	0.01	0.03	0.06	0.02	7.28	7.84	3.24	4.1	4.85	3.73	3.07	5.04	2.55	2.94	2.01	1.75	2.13	1.61	1.18	2.3	2.93
ENSMMUG00000004186	0.03	0	0.03	0.01	0.01	0.02	0.03	0.02	0.02	0.06	0	0.03	0	0.06	0	0.02	0.01	0	0.1	0.01	0	0	0.07	0.07	0.04	0.04	0	0	0.02	0.14	0	0.06	0.05	0.05	0	0	0.08	0.05	0.12	0	0.01	0	0.01	0	0.13	0	0	0	0
ENSMMUG00000004187	0.13	0.04	0.12	0.14	0.04	0.11	0.04	0.07	0	0.03	0.04	0.07	0.03	0.32	0.06	0.03	0.04	0	0.02	0.04	0.02	0.11	0.08	0.42	0.19	0	0.07	0	0.13	0.16	0.18	0.13	0.23	0.08	0.06	0.03	0.07	0.13	0.2	0.18	0	0	0.13	0.11	0.21	0.22	0	0.24	0.15
ENSMMUG00000004190	0.03	0.01	0.02	0.07	0.01	0.04	0.01	0.01	0.02	0.04	0.1	0	0.14	0.03	0.02	0.02	0.01	0.01	0.04	0.03	0.06	0	0	0.03	0.03	0.05	0.07	0.11	0.09	0.16	0.1	0.07	0.21	0.08	0.07	0.03	0.04	0.03	0.06	0.15	0	0.01	0.01	0.01	0.02	0	0.02	0	0.12
ENSMMUG00000004192	1.99	1.55	0.41	0.9	0.4	0.3	0.67	1.08	0.45	0.24	0.32	0.2	0.29	0.19	0.4	0.34	0.23	0.33	0.47	0.35	0.35	0.14	0.06	0.24	2.38	1.46	4.1	2.33	2.39	2.82	2.07	2.69	0.06	0.04	0.1	0.09	0.03	0.03	0.05	0.13	0.22	0.2	0.28	0.31	0.27	0.17	0.2	0.3	0.47
ENSMMUG00000004194	0	0.01	0	0.03	0.04	0.01	0.01	0.06	0	0.02	0	0	0.03	0	0	0	0	0	0	0	0	0	0	0.01	0	0.02	0	0.06	0	0	0	0	0	0.03	0	0.02	0.03	0.03	0	0.03	0.21	0.48	0	0.01	0.03	0	0	0.03	0.02
ENSMMUG00000004197	0.04	0.01	0.02	0.01	0.02	0.01	0.05	0.03	0.01	0.05	0	0.03	0.06	0.01	0.02	0.06	0.04	0.03	0.01	0.08	0.02	0.02	0.02	0.01	0.01	0.04	0.02	0.05	0.04	0.01	0.02	0.03	0.05	0.06	0.05	0.12	0.02	0.03	0.08	0.07	0.09	0.07	0.02	0.06	0.09	0.01	0.12	0.01	0.03
ENSMMUG00000004201	0.02	0	0	0	0.01	0.01	0	0	0.01	0.01	0	0.02	0	0.01	0	0.02	0.01	0	0	0	0	0	0.01	0.05	0.01	0.01	0.02	0	0	0	0.02	0.01	0	0.01	0.03	0.01	0	0.01	0.01	0.01	0.03	0.03	0.06	0.01	0.01	0	0.01	0.01	0.01
ENSMMUG00000004203	0.02	0	0.02	0	0	0	0	0.01	0	0	0	0	0	0	0	0	0	0.01	0	0	0	0	0.01	0.02	0	0	0	0.03	0	0.02	0.08	0	0.02	0.01	0.02	0.11	0	0	0	0	0.03	0	0	0	0	0	0	0	0
ENSMMUG00000004208	4.93	6.1	4.29	5.18	4.55	3.31	3.08	3.83	7.76	7.6	4.48	6.98	8.16	6.44	7.23	7.94	6.4	13.55	3.89	8.02	7.98	7.22	6.83	6.41	4.43	9.13	4	5.63	8.13	7.1	5.8	5.99	4.2	9.79	2.64	6.38	8.62	6.16	6.73	7.63	9.45	16.9	4.97	9.62	10.37	5.21	8.69	8.05	6
ENSMMUG00000004210	1.04	0.85	1.88	0.95	1.72	2.17	1.02	0.89	6.25	4.88	4.74	4.42	4.36	3.13	3.7	3.79	4.67	4.47	3.01	3.45	3.01	2.59	2.61	3.74	2.59	3.37	1.67	0.97	0.87	1.27	1.19	0.76	0.07	0.03	0.08	0.04	0.06	0.04	0.06	0.05	8.01	12.3	11.6	11.83	9.4	11.07	10.23	13.56	5.27
ENSMMUG00000004214	0.04	0.03	0.01	0.02	0.04	0.04	0.01	0.02	0.06	0.07	0.07	0.07	0.05	0.04	0.06	0.06	0.09	0	0.02	0.06	0.09	0.15	0.31	0.03	0.03	0.04	0.11	0.09	0.02	0.02	0	0	0.83	0.44	0.13	0.38	0.22	0.34	0.31	0.3	0.14	0.19	0.17	0.15	0.05	0.21	0.12	0.06	0.25
ENSMMUG00000004220	0.01	0.01	0.01	0	0	0.01	0	0	0.01	0.03	0	0.01	0.01	0	0.01	0.01	0	0	0	0	0	0	0.06	0.01	0.01	0.01	0	0.04	0.01	0.01	0	0	0.01	0.02	0	0.01	0	0.01	0.01	0	0	0	0.05	0.01	0.02	0.01	0	0	0.02
ENSMMUG00000004221	0.29	0.47	0.27	0.5	0.46	0.27	0.18	0.53	0.57	0.5	0.4	0.37	0.46	0.29	0.38	0.35	0.34	0.5	0.46	0.67	0.51	0.35	0.3	0.42	0.45	0.45	0.25	0.19	0.17	0.14	0.23	0.25	0.06	0.07	0.09	0.07	0.06	0.11	0.12	0.09	0.23	0.48	0.52	0.54	0.32	0.25	0.31	0.45	0.4
ENSMMUG00000004226	0.02	0	0	0	0	0	0.02	0.01	0.01	0.01	0	0	0	0.02	0	0.01	0.03	0.01	0	0	0.01	0	0	0	0	0.02	0.01	0.01	0	0.01	0	0	0.06	0.04	0.02	0.04	0	0.03	0.02	0.01	0	0	0	0	0.01	0.05	0.03	0	0.02
ENSMMUG00000004230	0.09	0.2	0.18	0.13	0.08	0.09	0.12	0.15	0.95	0.63	3.15	2.33	4.08	3.53	5.02	4.54	0.41	0.86	2.8	2.57	4.23	3.44	5.48	4.47	0.19	0.33	0.31	0.1	0.21	0.5	0.39	0.39	0.88	0.64	0.65	1.07	1.11	0.82	1.13	0.47	0.84	0.96	1.67	1.94	3.01	2.16	2.6	2.47	0.6
ENSMMUG00000004232	0.02	0.01	0.02	0.01	0.02	0.03	0.01	0.02	0.06	0.02	0.06	0.03	0.01	0.06	0.02	0	0.02	0.03	0.01	0	0.03	0.03	0	0.1	0.02	0.02	0.02	0.03	0	0.04	0.02	0.02	0.03	0.01	0.01	0.03	0	0.02	0.03	0.01	0.01	0.02	0	0.04	0.01	0.04	0.01	0	0.01
ENSMMUG00000004249	0.05	0.04	0.06	0.05	0.02	0.04	0.05	0.03	0.39	0.28	0.08	0.24	0.11	0.07	0.09	0.17	0.18	0.08	0.03	0.14	0.16	0.11	0.01	0.05	0.14	0.14	0.2	0	0.02	0.03	0.08	0.03	0.09	0.02	0.01	0.07	0.05	0.04	0	0	0.18	0.44	0.32	0.29	0.04	0.96	0.07	0.05	0.27
ENSMMUG00000004250	0	0.01	0	0	0.02	0	0.02	0.02	0.01	0.01	0	0	0.02	0.02	0.01	0	0	0	0	0	0.05	0.01	0.03	0.07	0.05	0.01	0.02	0.01	0.05	0.04	0	0.01	0.01	0.02	0.06	0.04	0.05	0.01	0.03	0.03	0	0.06	0.03	0.03	0.02	0.02	0.03	0	0
ENSMMUG00000004251	0.03	0.01	0.04	0.02	0.02	0.04	0.02	0.03	0	0.01	0.02	0.02	0	0.01	0.02	0.03	0.01	0.01	0.05	0.01	0	0.05	0	0.03	0.02	0	0.01	0.04	0.02	0.03	0.04	0.01	0.06	0.02	0.03	0.04	0.01	0.03	0.04	0.01	0.04	0.03	0.09	0.03	0.03	0.03	0.03	0.02	0.03
ENSMMUG00000004252	0.13	0.09	0.1	0.08	0.12	0.07	0.14	0.08	0.19	0.18	1.65	0.98	2.78	2.16	2.94	1.76	0.33	0.21	1	0.86	1.35	1.13	2.37	1.57	0.1	0.14	0.28	0.07	0.25	0.41	0.5	0.2	0.31	0.18	0.13	0.11	0.15	0.12	0.1	0.09	2.41	2.79	4.01	3.31	5.33	4.56	4.54	4.78	0.44
ENSMMUG00000004253	0.15	0.07	0.27	0.17	0.22	0.19	0.06	0.17	0.2	0.27	0.11	0.07	0.3	0.22	0.05	0.07	0.1	0.07	0.09	0.06	0.21	0.08	0.09	0.1	0.06	0.21	0.36	0.42	0.43	0.27	0.25	0.16	0.51	0.18	0.28	0.19	0.14	0.14	0.05	0.17	0.05	0.06	0.07	0.01	0.06	0.13	0.01	0.07	0.13
ENSMMUG00000004254	1.79	1.3	1.8	1.33	1.09	1.07	0.65	1.64	1.12	1.77	2.14	1.53	2.2	0.82	1.43	1.54	0.88	0.86	1.77	0.93	2.33	1.58	1.42	0.88	1.59	0.97	1.6	1.72	0.54	0.93	1.15	1.52	5.87	6.63	4.94	6.87	8.45	6.65	4.77	6.57	8.55	7.47	6.01	8.56	8.13	7.76	7.78	7.31	5.3
ENSMMUG00000004258	0.06	0.01	0.14	0.05	0.02	0.01	0	0.02	0.21	0.4	1.04	0.38	0.58	0.28	1.93	0.41	0.09	0.1	0.33	0.19	0.18	0.16	0.15	0.08	0.3	0.19	0.03	0	0.04	0.07	0.09	0.02	0.1	0.31	0.2	0.23	0.09	0.14	0.07	0.24	0.14	0.16	0.04	0.14	0.13	0.23	0.09	0.11	0.42
ENSMMUG00000004259	0.02	0	0.01	0.03	0.03	0.01	0.08	0.01	0.02	0	0.12	0.01	0	0	0	0	0	0	0.01	0.01	0.03	0	0	0	0	0.01	0.04	0	0	0.01	0.03	0.01	0.08	0.01	0.06	0.02	0.03	0	0	0	0	0.06	0.09	0.01	0	0.01	0	0.02	0.01
ENSMMUG00000004265	0.94	0.58	0.76	0.68	0.25	0.26	0.41	0.48	0.82	0.77	0.95	0.97	0.66	0.66	0.98	1.07	0.61	0.83	1.04	1.22	0.52	0.88	0.67	0.68	0.7	0.6	0.57	0.83	0.61	0.45	0.66	0.82	72.88	66.58	57.7	57.98	43.57	42.32	43.55	43.37	4.69	4.82	4.4	3.74	4.57	5.11	4.58	3.79	5.22
ENSMMUG00000004269	2.46	3.2	1.4	1	0.75	1.01	1.72	1.26	0.59	0.47	0.8	1.08	0.91	0.83	0.85	0.77	0.7	0.39	0.62	0.58	0.51	0.98	1.5	0.33	1.45	1.64	2.18	1.93	1.94	1.81	1.95	1.01	10.18	12.58	10.21	11.47	9.38	10.77	12.49	8.6	0.15	0.81	0.37	0.8	0.69	0.82	0.81	0.95	0.59
ENSMMUG00000004274	0.06	0.14	0.12	0.03	0.13	0.13	0.09	0.13	0.09	0.17	0.14	0.05	0.13	0.08	0.14	0.16	0.09	0.1	0.07	0.04	0.07	0.07	0.14	0.09	0.05	0.07	0.21	0.14	0.05	0.13	0.11	0.04	1.53	1.86	1.42	1.49	1.74	1.62	1.55	1.9	1.2	1.38	1	0.91	1.4	1.03	1.43	1.18	0.8
ENSMMUG00000004281	0.3	0.17	0.24	0.22	0.22	0.21	0.21	0.15	0.11	0.21	0.28	0.15	0.13	0.31	0.15	0.14	0.1	0.14	0.48	0.19	0.15	0.17	0.34	0.23	0.17	0.27	0.24	0.38	0.16	0.31	0.27	0.03	0.3	0.5	0.57	0.57	0.46	0.62	0.47	0.39	0.26	0.24	0.45	0.5	0.34	0.37	0.27	0.25	0.18
ENSMMUG00000004292	0.09	0.22	0.26	0.28	0.23	0.04	0.17	0.29	0.16	0.15	0.35	0.15	0.21	0.47	0.12	0.16	0.15	0.38	0.26	0.52	0.05	0.11	0.1	0.35	0.14	0.14	0.21	0.37	0.2	0.2	0.04	0.13	6.11	6.29	4.43	7.52	4.69	9.86	3.36	6.05	0.57	0.69	1	1.58	0.7	1.55	0.34	0.73	0.59
ENSMMUG00000004301	0.25	0.46	0.17	0.12	0.01	0.08	0.07	0.09	0	0.05	0	0	0	0	0.04	0	0	0.01	0.05	0	0.03	0	0	0.01	1.02	0.28	0.6	0.46	0.86	0.81	0.21	0.63	0.27	0.27	0.06	0.32	0.18	0.06	0.04	0.06	0.01	0.17	0.08	0.12	0.28	0	0.02	0.03	0.12
ENSMMUG00000004302	0.51	0.67	0.38	0.19	0.42	0.79	0.63	0.5	0.52	0.73	0.28	0.66	0.16	0.33	0.11	0.39	0.33	0.22	0.43	0.24	0.11	0.32	0.05	0.19	0.36	0.13	0.85	0.58	0.08	0.28	0.42	0.56	0.73	1.2	0.95	0.72	0.45	0.55	0.58	0.92	0.8	1.09	0.51	0.3	0.48	0.49	0.43	0.34	0.28
ENSMMUG00000004303	0.38	0.42	0.43	0.35	0.24	0.31	0.19	0.2	0.23	0.32	0.73	0.52	0.54	0.24	0.39	0.56	0.18	0.3	0.53	0.29	0.4	0.42	0.37	0.35	0.26	0.52	0.67	0.28	0.35	0.44	0.23	0.33	0.49	0.43	0.25	0.39	0.32	0.26	0.49	0.59	0.38	0.38	0.4	0.45	0.22	0.39	0.38	0.36	0.67
ENSMMUG00000004318	0.4	0.3	0.24	0.28	0.27	0.28	0.26	0.24	0.56	0.36	0.26	0.37	0.3	0.18	0.23	0.3	0.37	0.67	0.18	0.33	0.34	0.28	0.26	0.3	0.26	0.4	0.3	0.29	0.46	0.17	0.48	0.45	0.54	0.65	0.5	0.54	0.54	0.25	0.52	0.58	0.4	0.46	0.26	0.42	0.33	0.34	0.3	0.49	0.61
ENSMMUG00000004324	0.11	0.06	0.02	0.04	0	0.04	0.07	0.02	0.01	0.05	0.03	0	0.02	0	0.01	0	0.02	0.02	0.04	0.01	0	0	0	0.03	0.1	0.15	0.13	0.1	0.14	0.65	0.21	0.28	0.36	0.95	0.68	1.35	0.55	2.15	1.79	2.26	0.09	0.05	0.08	0.06	0.01	0.04	0.03	0.01	0.1
ENSMMUG00000004326	0.57	0.51	0.52	0.51	0.35	0.44	0.32	0.13	0.11	0.18	0.12	0.19	0.35	0.47	0.4	0.46	0.32	0.66	0.65	0.28	0.14	0.3	0.17	0.07	0.25	0.2	0.32	0.42	0.1	0.32	0.31	0.35	3.19	3.03	2.79	4.24	3.03	2.56	2.78	3.25	1.28	1.46	0.9	1.1	1.37	0.86	0.5	1.11	0.53
ENSMMUG00000004327	2.93	1.83	3.01	3.92	5.82	5.89	3.24	4.76	0.26	0.51	0.89	0.59	0.83	0.8	1.15	1.43	0.16	0.26	1.04	0.75	1.17	1.1	1.96	0.9	2.16	1.49	5.06	2.48	3	3.31	2.55	3.26	2.31	1.28	1.95	1.8	1.71	1.85	2.11	1.69	0.43	0.32	0.67	0.72	0.75	1.96	1.42	0.88	0.27
ENSMMUG00000004328	0.47	0.41	0.56	0.28	0.7	0.58	0.72	0.7	0.87	0.96	0.82	0.62	1.22	0.79	0.98	0.72	0.92	0.44	0.52	0.54	0.84	0.57	0.55	0.52	0.75	0.49	0.54	0.4	0.84	0.53	0.61	0.55	0.57	0.12	0.11	0.16	0.33	0.35	0.12	0.13	1.26	1.26	1.39	0.91	2.07	0.95	1.41	1	1.58
ENSMMUG00000004347	0.91	1.02	1.91	0.56	1.23	0.2	0.56	0.84	0.72	1.04	1.31	0.96	1.45	0.67	1.42	1.05	0.5	0.38	1.12	0.71	1.26	0.82	0.65	0.54	1.48	1.74	2.7	0.82	1.88	1.14	1.14	2.13	0.64	1.13	1.52	0.18	1.29	0.32	0.41	0.68	0.98	0.97	1.41	1.06	1.41	0.59	1.23	0.98	0.94
ENSMMUG00000004348	0	0	0	0	0.02	0.02	0.03	0	0.02	0	0	0	0	0.04	0	0	0	0	0	0	0	0	0	0.02	0	0	0	0	0	0.06	0	0	0.06	0.17	0.22	0.24	0.06	0.21	0.19	0.03	0	0	0	0	0.02	0	0.02	0	0
ENSMMUG00000004352	0.1	0.14	0.21	0.19	0.06	0.04	0.22	0.26	0.15	0.02	0.1	0.05	0	0.17	0.11	0.04	0.05	0	0.22	0.02	0.03	0.07	0.03	0.04	0.05	0.03	0.2	0.07	0.1	0.12	0.08	0	0.26	0.23	0.29	0.33	0.12	0.28	0.47	0.44	0.27	0.24	0.26	0.32	0.2	0.25	0.27	0.24	0.16
ENSMMUG00000004353	0.01	0	0.08	0.02	0	0.03	0.01	0.04	0.05	0.01	0.02	0.11	0.01	0.02	0.03	0.02	0.04	0.01	0.01	0	0.01	0.01	0.01	0.01	0.04	0.13	0.03	0.01	0.04	0.06	0.02	0.06	0.07	0.06	0.04	0.03	0.03	0.07	0	0.04	0	0.03	0.02	0.08	0.01	0.01	0.02	0.02	0.08
ENSMMUG00000004355	0	0	0.25	0.03	0.09	0.09	0.03	0.09	0.08	0	0	0	0.2	0.2	0.13	0.14	0.03	0.06	0.21	0.22	0	0	0	0.03	0.08	0.08	0.15	0.05	0	0.11	0.12	0.06	0.11	0.08	0.75	0	0.05	0.19	0.54	0.28	0.09	0.53	0.56	0.05	0.26	0.36	0.06	0.73	0
ENSMMUG00000004362	2.66	2.87	5.97	3.3	2.03	1.65	2.84	2.66	1.49	2.14	3.41	2.61	2.15	2.26	3.6	2.49	2.2	2.01	3.47	2.63	2.35	2.1	3.16	2.21	2.42	2.03	5.87	3.25	3.33	3.23	3.92	4.22	1.4	1.37	1.8	1.49	2.53	1.57	1.92	1.95	2.05	1.14	3.47	2.42	2.05	2.74	2.82	1.74	2.36
ENSMMUG00000004363	0.22	0.32	0.11	0.22	0.37	0.44	0.56	0.28	0.27	0.18	0.31	0.36	0.31	0.25	0.16	0.38	0.46	0.24	0.17	0.19	0.04	0.35	0.2	0.27	0.25	0.6	0.22	0.23	0.29	0.32	0.28	0.08	0.75	0.39	0.24	0.13	0.57	0.09	0.28	0.42	0.22	0.32	0.61	0.24	0.06	0.23	0.23	0.18	0.21
ENSMMUG00000004364	0.29	0.28	0.07	0.38	0.19	0.23	0.15	0.03	0.35	0.1	0.18	0.13	0.37	0.38	0.14	0.12	0.48	0.27	0.13	0.33	0.11	0.05	0.14	0.17	0.13	0.1	0.29	0.53	0.62	0.19	0.31	0.05	0.13	0.21	0.39	0.25	0.18	0.19	0.12	0.32	0.1	0.07	0.13	0.07	0.37	0.11	0.03	0.06	0.48
ENSMMUG00000004367	0.06	0.17	0.2	0.22	0.12	0.11	0.14	0.13	0.11	0.17	0.1	0.06	0.11	0.04	0	0.03	0.05	0.02	0.12	0.05	0.06	0	0.07	0.02	0.11	0.05	0	0.4	0.22	0	0.07	0.43	0.06	0.11	0.23	0.3	0	0.03	0.12	0.08	0.22	0.04	0	0.11	0.13	0.19	0.04	0.11	0.24
ENSMMUG00000004384	0.05	0.03	0.06	0.04	0.04	0.03	0.03	0.05	0.02	0.04	0.02	0.03	0.01	0.03	0.03	0.03	0.03	0.09	0.04	0.01	0.01	0.01	0.03	0.08	0.03	0.02	0.04	0.07	0.04	0.05	0.02	0.07	0.08	0.06	0.03	0.06	0.04	0.05	0.03	0.03	0.06	0.02	0.09	0.07	0.01	0.01	0.03	0.05	0.03
ENSMMUG00000004404	0.44	0.41	0.47	0.21	0.35	0.28	0.62	0.51	0.72	0.52	0.61	0.46	0.59	0.69	0.82	0.71	0.27	0.35	0.7	0.49	0.51	0.61	0.71	0.54	0.31	0.33	0.26	0.25	0.39	0.23	0.39	0.41	3.96	5.88	6.31	5.04	3.25	2.63	3.32	2.87	17.91	19.96	12.28	12.46	15.02	16.08	10.47	10.86	17.96
ENSMMUG00000004411	0.2	0.37	0.65	0.6	0.53	0.49	0.26	0.35	0.11	0.22	0.26	0.18	0.17	0.18	0.15	0.27	0.02	0.32	0.24	0.32	0.21	0.24	0	0.29	0.53	0.64	0.97	1.05	0.63	0.72	0.83	0.36	9.65	12.03	9.46	11.55	7.94	9.22	10.45	7.29	4.92	7	7.94	8.24	7.45	9.66	8.69	6.12	3.41
ENSMMUG00000004415	1.6	1.78	10.14	1.33	1.38	0.98	1.77	1.49	7.22	3.32	4.79	4.38	3.02	3.27	3.08	3.48	3.19	2.61	2.79	1.47	1.98	1.98	2.87	1.74	2.88	3.61	2.82	2.56	1.47	2.75	1.85	2.32	0.12	0.09	0.13	0.1	0.13	0.4	0.09	0.16	1.48	3.5	3.26	3.14	2.43	2.28	3.23	2.49	3.29
ENSMMUG00000004424	0	0.22	0.5	0.03	0	0.44	0	0.38	0.64	0.14	0.54	0.41	0.16	0.58	0	1.02	0.03	0.26	0.47	0.34	0.07	0.29	0.03	0.51	0.13	0	0	0	0	1.86	0	1.15	0	0.04	0.09	0	0	0	0	0	0	0.13	0.13	0.6	0.19	0	0	0.38	0.5
ENSMMUG00000004430	0	0	0	0	0	0	0	0	0	0	0	0	0	0	0	0	0	0	0	0	0	0	0	0	0	0	0	0	0	0	0	0	4.04	3.43	7.86	5.76	7.19	7.41	5.28	7.29	2.17	2.88	7.81	5.91	7	6.45	5.21	5.84	1.49
ENSMMUG00000004436	1.19	1.04	0.86	0.53	0.43	0.68	0.57	0.74	0.86	0.77	0.64	0.5	0.42	0.57	0.57	0.34	0.57	0.22	0.69	0.41	0.19	0.56	0.05	0.31	0.84	0.98	0.8	0.7	0.38	0.38	0.57	0.45	25.89	19.95	15.38	19.09	9.96	10.65	9.58	9.66	24.22	33.98	23.67	19.02	19.86	25.58	22.37	18.39	27.15
ENSMMUG00000004440	0.62	0.14	0.32	0.49	0.05	0.45	0.39	0.61	0.35	0.55	0.72	0.6	0.32	0.43	1.16	0.61	0.92	0.73	0.62	0.67	0.47	0.95	0.69	0.33	0.32	0.52	0.17	0.13	0.53	0.5	0.36	0.8	0.35	0.18	0.19	0.45	0.35	0.31	0.49	0.27	0.54	0.46	0.77	0.42	0.34	0.77	0.48	0.3	0.47
ENSMMUG00000004441	3.59	2.57	5.57	3.94	2.68	2.45	3.59	2.97	2.12	3.49	7.62	5.26	4.89	6.47	5.56	5.37	3.95	2.56	5.61	6.74	5.31	5.73	6.68	4.55	2.67	2.14	4.59	3.71	4.55	4.09	4.08	5.64	1.98	2.26	2.78	3.13	3.43	2.52	3.21	2.8	2.42	1.75	2.89	2.07	3.41	3.88	2.8	3.7	3.27
ENSMMUG00000004442	0.71	0.43	1.85	1.43	0.66	1	1.86	0.56	3.92	4.89	6.38	5.37	4.07	5.84	7.58	2.07	3.87	3.8	5.93	7.46	3.78	7.5	9.42	1.71	0.79	1.39	2.24	2.14	0.78	2.69	4.45	0.92	35.85	32.41	62.08	47.66	19.68	66.44	59.09	20.28	3.33	2.35	4.91	5.01	2.7	5.07	6.87	1.63	4.89
ENSMMUG00000004448	1.11	4.46	4.9	2.04	1.7	1.57	4.8	4.41	1.06	0.53	1.41	1.12	1.23	1.46	0.97	1.42	0.85	2.16	3.23	1.88	1.94	1.83	3.39	4.47	4.34	9.03	11.06	7.8	4.69	7.08	7.6	9.55	1.8	3.17	2.91	2.11	1.85	1.53	2.69	3.01	1.42	3.64	5.45	6.09	3.46	4.53	7.03	6.35	0.77
ENSMMUG00000004456	0.17	0.16	0.2	0.2	0.25	0.26	0.16	0.09	0.19	0.46	0.29	0.23	0.54	0.35	0.22	0.32	0.08	0.18	0.22	0.16	0.29	0.15	0.07	0.24	0.16	0.14	1.19	0.95	0.76	0.49	0.65	0.35	0.59	0.4	0.51	0.41	0.18	0.2	0.19	0.17	0.07	0.09	0.11	0.08	0.11	0.15	0.08	0.09	0.26
ENSMMUG00000004463	0.01	0.02	0.18	0.02	0.02	0.03	0.02	0.04	0.05	0.08	0.24	0.11	0.06	0.06	0.13	0.03	0	0.08	0.17	0.1	0.01	0	0.01	0.01	0.01	0.01	0.12	0.09	0.03	0.06	0.05	0.02	0.62	0.56	0.57	0.65	0.41	0.36	0.49	0.35	0.73	0.57	1.05	0.7	0.52	0.35	0.92	0.52	0.77
ENSMMUG00000004464	0.04	0.07	0.08	0.04	0.06	0.05	0.11	0.04	0.03	0.12	0.12	0.06	0.07	0.08	0.07	0.14	0.02	0.04	0.07	0.03	0.03	0.03	0.04	0.06	0.04	0.08	0.15	0.09	0.06	0.07	0.11	0.14	0.12	0.27	0.3	0.3	0.33	0.26	0.24	0.26	0.11	0.15	0.56	0.42	0.35	0.34	0.33	0.3	0.27
ENSMMUG00000004472	0.27	0.21	0.23	0.26	0.19	0.27	0.3	0.42	0.46	0.72	0.85	0.52	1	0.74	0.76	0.79	0.37	0.42	0.42	0.76	0.7	0.73	0.48	0.26	0.32	0.31	0.38	0.21	0.32	0.44	0.32	0.28	1.81	1.31	0.78	1.38	1.42	0.78	0.77	0.83	1.04	0.88	0.92	0.47	0.9	0.83	0.66	0.5	0.98
ENSMMUG00000004477	0.23	0.25	0.19	0.12	0.32	0.28	0.14	0.43	0.55	0.29	0.29	0.7	0.35	0.4	0.47	0.42	0.42	0.34	0.18	0.33	0.16	0.32	0.32	0.12	0.27	0.3	0.23	0.11	0.09	0.33	0.24	0.05	4.76	5.04	8.61	5.41	6.81	7.7	7.66	6.77	1.07	0.92	0.92	0.78	0.91	1.02	0.8	0.93	0.86
ENSMMUG00000004480	0.3	0.16	0.15	0.19	0.36	0.24	0.06	0.22	0.21	0.1	0.11	0.21	0.1	0.2	0.13	0.14	0.14	0.01	0.14	0.11	0.27	0.19	0.46	0.2	0.31	0.2	0.28	0.18	0.14	0.25	0.16	0.15	0.71	0.65	0.35	0.83	0.35	0.71	0.48	0.78	0.16	0.07	0.43	0.13	0.15	0.13	0.1	0.09	0.21
ENSMMUG00000004485	5.4	5.57	6.89	4.34	3.98	4.54	4.88	3.98	15.55	15.01	17.06	14.99	13.9	14.38	17.8	15.61	8.68	8.24	10.22	12.35	8.78	7.53	7.86	7.34	8.33	8.7	7.09	6.27	6.05	6.1	7.09	5.22	640.38	606.59	612.18	562.58	513.93	496.04	518.45	514.77	82.99	96.94	59.79	48.32	83.38	70.42	64.49	66.61	89.78
ENSMMUG00000004489	0.05	0.03	0.05	0.07	0.04	0.03	0.04	0.03	0.04	0.07	0.08	0.01	0.06	0	0.02	0.02	0.02	0.06	0.12	0.04	0.04	0.09	0.01	0	0.1	0.06	0.05	0.04	0.04	0.06	0.06	0.03	0.06	0.03	0.07	0.06	0.05	0.05	0.04	0.07	0.05	0.08	0.09	0.05	0.07	0.04	0.04	0.04	0.03
ENSMMUG00000004500	0.13	0.06	0.06	0.06	0.1	0.09	0.03	0.06	0.12	0.09	0.08	0.13	0.14	0.15	0.06	0.02	0.12	0.09	0.09	0.04	0.28	0.15	0.13	0.06	0.13	0.08	0.1	0.04	0.31	0.11	0.13	0.08	0.04	0.05	0.01	0.03	0.01	0.01	0.01	0	0.03	0.03	0.03	0.05	0.06	0.02	0.07	0.01	0.05
ENSMMUG00000004507	0.11	0.22	0.15	0.09	0.14	0.1	0.04	0.11	0.14	0.25	0.1	0.11	0.52	0.21	0.09	0.18	0.14	0.1	0.05	0.06	0.2	0.13	0.18	0.14	0.24	0.2	1.24	1.58	0.65	0.56	0.49	0.13	0.81	0.42	0.27	0.28	0.32	0.28	0.18	0.27	0.05	0.16	0.08	0.1	0.18	0.13	0.05	0.05	0.12
ENSMMUG00000004512	4.65	3.38	6.75	4.22	2.95	2.7	3.5	3.56	1.74	3.04	6.12	3.98	3.98	3.47	4.03	2.97	4.09	2.18	6.92	6.02	5.99	4.13	7.6	2.56	3.42	2.07	10.5	7.56	6.38	9.7	5.58	8.21	3.96	2.48	4.22	3.47	5	3.76	4.95	3.89	3	1.01	4.83	3.37	3.32	2.24	2.38	3.44	4.69
ENSMMUG00000004513	0.03	0.03	0	0.08	0	0	0	0	0	0	0	0.05	0.09	0	0.08	0.09	0	0	0	0	0	0	0.05	0	0	0	0	0	0	0	0	0	0	0	0	0	0	0	0	0	0.28	0	0	0	0	0	0	0	0
ENSMMUG00000004516	0.26	0.18	0.23	0.2	0.11	0.12	0.02	0.2	0.15	0.21	0	0.17	0	0.04	0.03	0.15	0.12	0.23	0.02	0.23	0.04	0.02	0	0.02	0.05	0.13	0.03	0.2	0.12	0	0.16	0.19	0.03	0.12	0.05	0	0	0	0	0	0.12	0.09	0.1	0	0.2	0	0	0	0.39
ENSMMUG00000004524	0	0.13	0.35	0.03	0.03	0.03	0	0.06	0.1	0.04	0.49	0.14	0	0.12	0	0	0	0	0.87	0	0.12	0	0	0	0.04	0	0.55	0.14	0	0.05	0.06	0.11	0.29	0.17	0.73	0.25	0.1	0.16	0	0.04	0.01	0.15	0.4	0.06	0.32	0.32	0.01	0	0.28
ENSMMUG00000004526	0.04	0.04	0.66	0.17	0.07	0.03	0.01	0.03	0.14	0.21	0.32	0.17	0.22	0	0.21	0.19	0.07	0.32	1.09	0.33	0.2	0.06	0.38	0.22	0.11	0.25	0.59	0.05	0.02	0.13	0.14	0.11	0.09	0.13	0.33	0.02	0.05	0.21	0.04	0.09	0.27	0.15	0.29	0.05	0.09	0.1	0.13	0.04	0.12
ENSMMUG00000004527	0	0	0	0	0.03	0	0.03	0.06	0.03	0	0	0.05	0.09	0	0.04	0	0	0.03	0.05	0	0	0	0	0	0	0	0.14	0	0	0	0	0	0.15	0.03	0.03	0.19	0	0	0.18	0	0	0	0.03	0.07	0	0.03	0	0	0.07
ENSMMUG00000004532	0	0	0	0.01	0.04	0.02	0.01	0.02	0.02	0	0.03	0	0.01	0	0.03	0.04	0.03	0	0.03	0	0	0.01	0.02	0	0	0	0	0	0.02	0	0	0	0.01	0.01	0.02	0.03	0.02	0.02	0.02	0.01	0	0	0.01	0	0.01	0	0	0.04	0
ENSMMUG00000004538	0.01	0.05	0.02	0.02	0.06	0.06	0.05	0.06	0.03	0.07	0.07	0.13	0.06	0.05	0.01	0.06	0.05	0.02	0.03	0.07	0.07	0.09	0.03	0.01	0.08	0.03	0.05	0.03	0.03	0.03	0.01	0.01	0.02	0.07	0.02	0.08	0.03	0.09	0.02	0.03	0.42	0.35	0.05	0.09	0.14	0.09	0.06	0.04	0.26
ENSMMUG00000004542	0.02	0.03	0.05	0.03	0.03	0.07	0.03	0.02	0.04	0.01	0.02	0.05	0.06	0.03	0.05	0.02	0	0.06	0.04	0.06	0.09	0.04	0.01	0.02	0.02	0.05	0.05	0.11	0.08	0.06	0.01	0.04	0.04	0.04	0.05	0.06	0.01	0.07	0.03	0.04	0.02	0.01	0.02	0.06	0.06	0.03	0.04	0.02	0.03
ENSMMUG00000004543	0.02	0.03	0.11	0.01	0.04	0	0.04	0	0.02	0.01	0	0	0.01	0	0.03	0.07	0.02	0.04	0	0.01	0.09	0.01	0	0	0.02	0.06	0.01	0.06	0.05	0	0	0.02	0	0.04	0.02	0.04	0.03	0.01	0	0.03	0	0.02	0.04	0	0	0.04	0.04	0	0
ENSMMUG00000004552	0.17	0.42	0.24	0.24	0.14	0.16	0.13	0.22	0.33	0.22	0.58	0.11	0.52	0.28	0.39	0.52	0.08	0.1	0.18	0.45	0.4	0.48	0.48	0.35	0.25	0.32	0.14	0.25	0.35	0.45	0.47	0.23	21.6	26.41	20.64	26.04	26.69	35.84	32.52	31.48	23.55	21.53	22.7	29.61	35.15	31.98	25.79	25.69	19.3
ENSMMUG00000004555	0.05	0.1	0.02	0.15	0.02	0.09	0.13	0.09	0.06	0.01	0.09	0.06	0.14	0.02	0.14	0.1	0.02	0.18	0.07	0.02	0.12	0.13	0.09	0.05	0.03	0.16	0.01	0.04	0.16	0.02	0.05	0.15	0.62	1.04	0.7	1.28	1.81	0.53	1.7	1.24	0.4	0.68	0.78	1.42	1.35	0.33	1.24	1.01	0.06
ENSMMUG00000004564	0.12	0.15	0.16	0.13	0.16	0.17	0.1	0.16	0.1	0.13	0.33	0.09	0.39	0.21	0.2	0.16	0.11	0.12	0.39	0.19	0.4	0.23	0.45	0.34	0.02	0.04	0.16	0.12	0.21	0.21	0.09	0.11	0.42	0.8	0.64	0.49	0.38	0.62	0.61	0.6	0.21	0.19	0.77	0.44	0.82	0.72	1.1	0.87	0.26
ENSMMUG00000004565	2.04	1.63	0.71	1.27	0.76	0.85	1.2	1.28	0.26	0.19	0.13	0.1	0.12	0.11	0.13	0.24	0.17	0.2	0.06	0.03	0.03	0	0	0	0.11	0.1	0.16	0.35	0.75	0.23	0.66	0.32	0	0.03	0.03	0.01	0.05	0.04	0.04	0	0.02	0.01	0.03	0.01	0.14	0.02	0.03	0.02	0.31
ENSMMUG00000004566	0.28	0.45	0.49	0.29	0.45	0.36	0.28	0.25	0.5	0.41	0.23	0.35	0.22	0.28	0.33	0.23	0.4	0.45	0.13	0.36	0.27	0.25	0.23	0.26	0.37	0.56	0.34	0.23	0.16	0.11	0.24	0.27	0.78	0.35	0.41	0.41	0.71	0.4	0.75	0.38	1.36	1.38	0.8	0.91	1.37	1.4	1.21	1.51	1.13
ENSMMUG00000004572	0.11	0.04	0.05	0.04	0.06	0.12	0.09	0.03	0.08	0	0.07	0.03	0.1	0.05	0.01	0.07	0.03	0.05	0.02	0.07	0.05	0.07	0.02	0.01	0.02	0.02	0.02	0.06	0.01	0.05	0.05	0.02	0.04	0.06	0.02	0.04	0.08	0.02	0.02	0.04	0.02	0.04	0.03	0.01	0.04	0.06	0.09	0.04	0.08
ENSMMUG00000004573	4.35	3.71	4.14	3.72	4.3	4.69	3.04	3.45	2.32	2.79	1.65	1.65	1.19	1.21	1.19	1.18	2.05	1.42	0.93	1.93	1.16	0.8	0.98	1.4	1.84	1.98	2.06	2.84	1.97	2.01	2.26	1.57	11.18	7.34	6.81	8.33	9.01	6.36	9.34	4.72	44.83	61.58	33.54	27.45	27.95	31.59	24.79	29.29	42.78
ENSMMUG00000004581	0.19	0.22	0.13	0.15	0.07	0.12	0.14	0.1	0.23	0.39	0.58	0.49	0.36	0.52	0.46	0.23	0.43	0.14	0.23	0.34	0.05	0.29	0.21	0.19	0.55	0.13	0.3	0.04	0.11	0.09	0.22	0.34	4.02	2.33	2.93	2.05	2.01	1.59	2.4	2.3	19.5	21.09	14.89	9.58	13.1	15.91	13.72	13.12	9.8
ENSMMUG00000004588	0.36	0.39	0.2	0.44	0.32	0.28	0.18	0.14	0.12	0.13	0.09	0.23	0.42	0.08	0.25	0.18	0.02	0.02	0.14	0.24	0.41	0.3	0.15	0.17	0.54	0.16	0.78	0.12	0.64	1.45	0.39	1.03	1.25	0.59	0.76	1.2	0.77	1.37	0.7	0.88	0.8	0.38	0.25	0.57	0.54	0.55	0.16	0.64	0.21
ENSMMUG00000004597	0.59	0.42	0.46	0.43	0.46	0.59	0.27	0.32	0.3	0.75	0.48	0.49	1.85	0.44	0.56	0.79	0.52	0.4	0.48	0.3	0.56	0.47	0.4	0.39	0.59	0.49	2.19	1.67	1.05	1.8	0.7	0.77	5.8	3.02	1.47	2.64	0.82	1.3	0.86	1	0.48	0.32	0.71	0.43	0.5	0.39	0.57	0.73	0.7
ENSMMUG00000004601	0.08	0.11	0.25	0.11	0.15	0.12	0.12	0.08	0.15	0.11	0.07	0.14	0.25	0.08	0.06	0.18	0.12	0	0.16	0	0.22	0.46	0.11	0.3	0.15	0.1	0.46	0.07	0	0.22	0	0.31	0.77	1.51	0.65	0.72	0.82	0.66	0.83	0.62	1	0.65	0.86	0.67	0.62	0.63	0.28	0.57	0.37
ENSMMUG00000004605	1.32	1.59	0.76	1.19	0.41	0.45	0.4	0.21	2.59	4.78	2.02	4.05	1.62	1.09	1.54	1.34	4.87	5.46	1.55	7.22	1.06	0.55	0.69	0.53	1.25	4.68	2.96	1.29	1.4	2.25	0.57	0.36	0.22	0.26	0.19	0.27	0.57	0.15	0.42	0.33	0.2	0.18	0.2	0.13	0.43	0.28	0.4	0.43	3.32
ENSMMUG00000004616	0.21	0.07	0.46	0.16	0.62	0.28	0.36	0.51	0.22	0.23	0.28	0.24	0.4	0.41	0.42	0.47	0.31	0.19	0.32	0.26	0.48	0.51	0.37	0.34	0.32	0.14	0.32	0.1	0.38	0.18	0.38	0.42	1.54	1.58	1.78	1.75	3.08	3.38	1.95	2.92	2.08	1.71	4.47	2.84	4.5	3.07	2.25	4.71	1.62
ENSMMUG00000004617	0.01	0.02	0.03	0.01	0.01	0	0.04	0.01	0.03	0.04	0.04	0.01	0.02	0.03	0.05	0.01	0.02	0.03	0	0.01	0	0.01	0	0	0.01	0.01	0	0	0.01	0.03	0.01	0.05	0.65	0.32	0.5	0.81	1.07	0.98	0.33	0.44	0	0.05	0.04	0	0	0.02	0.02	0.02	0.02
ENSMMUG00000004618	0.03	0.01	0	0.01	0	0.01	0.01	0	0.03	0.05	0.01	0	0.09	0.06	0	0.03	0.01	0	0.01	0.02	0.01	0.04	0.01	0.04	0.03	0.01	0.09	0.05	0.03	0.06	0.01	0.12	0.08	0.07	0.04	0.06	0.03	0.04	0	0.03	0.03	0	0.05	0.05	0.01	0.04	0.02	0.02	0.05
ENSMMUG00000004622	0.06	0.14	0.16	0	0.02	0.04	0.04	0.18	0.27	0.39	1.15	0.25	1.53	0.47	0.81	1.14	0.17	0.26	0.37	0.38	0.6	0.28	0.62	0.57	0.1	0.06	0.11	0.01	0.08	0.03	0.06	0.08	0.14	0.03	0.03	0.03	0.04	0.04	0.07	0.1	0.27	0.13	0.35	0.25	0.81	0.41	0.7	0.61	0.33
ENSMMUG00000004632	0.34	0.78	0.27	0.39	0.26	0.12	0.11	0.14	0.22	0.14	0.17	0.22	0.25	0.18	0.23	0.1	0.14	0.16	0.32	0.08	0.15	0.21	0.02	0.13	0.2	0.22	0.27	0.19	0.17	0.29	0.09	0.22	0.2	0.51	0.19	0.46	0.06	0.19	0.17	0.17	0.07	0.83	0.15	0.45	0.27	0.37	0.13	0.2	0.28
ENSMMUG00000004638	0	0	0	0	0	0	0	0	0	0	0	0	0	0	0	0	0	0	0	0	0	0	0	0	0	0	0	0	0	0	0	0	0.16	0.22	0.49	0.21	0.15	0.06	0.28	0.27	0.15	0.32	0.34	0.26	0.44	0.5	0.91	1.14	0.42
ENSMMUG00000004647	0.64	0.45	3.62	0.61	0.13	0.19	0.14	0.28	3.26	1.46	1.73	2.11	2.24	1.87	2.52	2.36	1.79	0.9	0.89	0.37	1.24	0.74	1.27	1.89	3.32	4.18	2.41	2.2	1.14	1.76	0.86	1.59	19.37	12.04	12.91	11.94	19.33	12.31	19.1	8.29	1.15	2.38	2.43	6.14	1.32	0.92	3.51	2.86	2.88
ENSMMUG00000004666	4.05	4.71	5.28	3.3	2.95	3.04	4.04	3.36	2.53	2.97	5.71	4.44	3.74	5.48	5.44	5.27	3.19	2.64	5.92	3.91	3.79	4.98	6.53	4.5	2.61	2.77	4.21	3.67	3.5	4.18	4.03	3.08	1.9	2.02	2.53	3.03	1.35	1.44	3.53	1.43	3.73	2.78	4.94	3.66	3.73	7.16	4.13	3.8	3.66
ENSMMUG00000004667	1.02	0.49	0.38	0.47	0.19	0.02	0.36	0.12	0.74	3.12	1.51	2.42	0.72	0.7	0.73	0.54	2.26	0.83	2.09	3.92	1.32	0.66	0.42	0.36	1.94	0.74	0.5	0.58	0.33	0.1	0.26	0.04	2.59	2.86	1.06	0.88	0.94	0.35	0.28	0.72	2.17	0.68	1.76	1.45	0.86	0.27	0.29	0.46	2.44
ENSMMUG00000004668	0.39	0.3	0.34	0.63	0.71	0.72	0.56	0.38	0.07	0.07	0.08	0.15	0.22	0.07	0.14	0.16	0.11	0.06	0.17	0.14	0.12	0.09	0.09	0.14	0.11	0.13	0.09	0.22	0.09	0.15	0.25	0.19	1.15	1.2	1.2	1.29	1.7	1.5	1.61	1.33	1.66	1.52	1.49	1.63	1.62	3.24	2.04	1.76	1.63
ENSMMUG00000004669	0.01	0.01	0.01	0.01	0.01	0	0.01	0.01	0.02	0.01	0.01	0.02	0.01	0.01	0	0.04	0.02	0.05	0	0.01	0.01	0.01	0.02	0	0	0.03	0.02	0.02	0	0.01	0.02	0.06	0.03	0.03	0.03	0.03	0.01	0.02	0.01	0.01	0.01	0.01	0	0.01	0	0.01	0.01	0.01	0.01
ENSMMUG00000004671	6.99	6.64	6.1	6.24	5.5	6.56	4.92	6.84	5.68	5.82	4.23	4.4	3.84	3.36	3.59	4.12	3.66	3.76	3.67	4.16	2.21	3.09	2.49	2.52	3.51	3.8	3.36	4.59	3.88	3.51	4.35	3.74	128.24	130.23	140.99	118.35	81.06	78.47	86.22	62.2	139.42	175.74	104.79	104.9	88.75	110.01	91.39	84.48	107.29
ENSMMUG00000004672	0.02	0	0.08	0	0.02	0.05	0.02	0.01	0	0.15	0.09	0	0.3	0.06	0.03	0.12	0	0	0.01	0.02	0.1	0.06	0.08	0.06	0.05	0.06	0.16	0.24	0.09	0.16	0.2	0	0.37	0.18	0.14	0.07	0.14	0.03	0.05	0.08	0.06	0.02	0.09	0.02	0.01	0.03	0.04	0.01	0.01
ENSMMUG00000004673	0	0.03	0.02	0	0	0.03	0	0.04	0.01	0	0.04	0	0.02	0.05	0.01	0.02	0.03	0	0	0	0.01	0.03	0.01	0	0	0.01	0.09	0.07	0	0	0.04	0.02	0.09	0.06	0.07	0.06	0	0.06	0.07	0.07	0.03	0.04	0	0.03	0	0.03	0	0.01	0
ENSMMUG00000004687	9.1	7.11	10.69	9.5	4.24	4.67	7.38	8.54	13.33	17.7	18.96	19.97	14.6	14.07	16.74	18.2	16.29	11.89	10.39	14.12	11.29	10.69	13.92	13.78	10.46	9.31	9.81	9.6	11.11	11.89	10.15	13.43	5.95	6.96	7.79	12.3	9.46	11.62	12.29	11.24	12.33	9.79	8.95	14.18	12.15	10.68	11.08	12.93	15.99
ENSMMUG00000004689	0.07	0.06	0.07	0.11	0.05	0.18	0.03	0.02	0.02	0.13	0.09	0.11	0.07	0.21	0.16	0.12	0.12	0.03	0.09	0.17	0.15	0.07	0.28	0.04	0.12	0.13	0.12	0.19	0.08	0.14	0.09	0.22	0.15	0.23	0.21	0.25	0.2	0.13	0.19	0.26	0.25	0.33	0.21	0.26	0.24	0.53	0.4	0.26	0.14
ENSMMUG00000004692	0.11	0.11	0.08	0.07	0.06	0.06	0.03	0.04	0.06	0.1	0.12	0.06	0.09	0.03	0.08	0.06	0.14	0.13	0.06	0.13	0.1	0.06	0.08	0.06	0.15	0.12	0.09	0.06	0.11	0.08	0.11	0.04	0.11	0.03	0.05	0.06	0.02	0.02	0.08	0.08	0.13	0.08	0.1	0.08	0.11	0.04	0.05	0.07	0.14
ENSMMUG00000004693	0.07	0.02	0.15	0.18	0.14	0.09	0.03	0.13	0.32	0.05	0.03	0.12	0.03	0.04	0.1	0.08	0.16	0.19	0.27	0.23	0.02	0.11	0	0.06	0.05	0.05	0	0.06	0.08	0.03	0.22	0.04	0.16	0.21	0.09	0.17	0	0	0	0.03	0.08	0.03	0.04	0.04	0.07	0	0	0	0.07
ENSMMUG00000004694	0.03	0.03	0.02	0.01	0.02	0.03	0.04	0.05	0.04	0.06	0.02	0.08	0.1	0.04	0.08	0.08	0.11	0.04	0.06	0.04	0.08	0.01	0.07	0.02	0.01	0.04	0.12	0.07	0.07	0.13	0.09	0	0.07	0.05	0.04	0.07	0.02	0.16	0.05	0.07	0.04	0.06	0.04	0.05	0.05	0.03	0.02	0.03	0.11
ENSMMUG00000004699	0.09	0.09	0.19	0.01	0.1	0.02	0.03	0.04	0	0.06	0.06	0.11	0.05	0.05	0.05	0.07	0	0.17	0.02	0.01	0	0.03	0.01	0.01	0.11	0.13	0.05	0	0.2	0	0.02	0.13	0.13	0.14	0.2	0.17	0.19	0.08	0.2	0.13	0	0.02	0.08	0.23	0	0.03	0.08	0.02	0.06
ENSMMUG00000004702	9.19	4.45	22.19	2.37	4.94	3.59	7.13	8.1	7.49	21.11	67.06	25.36	35.33	40.1	27.21	40.68	17.18	20.02	51.84	29.42	34.15	37.12	20.14	16.14	13.53	6.54	27.1	3.33	5.9	5.35	5.5	5.92	11.64	10.9	28.38	11.17	18.21	6.58	9.81	24.33	35.79	26.12	48.39	12.39	25.43	32.4	11	19.89	23.8
ENSMMUG00000004706	0.24	0.25	0.13	0.16	0.17	0.15	0.11	0.12	0.06	0.07	0.03	0.07	0.02	0.06	0.08	0.07	0.03	0.03	0.06	0.05	0.06	0.06	0.07	0.01	0.05	0.18	0.11	0.08	0.13	0.13	0.05	0.06	0.18	0.07	0.05	0.06	0.04	0.03	0.07	0.06	0.09	0.12	0.14	0.11	0.15	0.08	0.09	0.04	0.11
ENSMMUG00000004711	2.62	3.21	3.77	3.53	3	3.57	2.06	2.49	1.71	1.5	3	2.31	2.91	3.81	3.94	3.21	1.87	1.18	2.4	3.53	3.36	3.67	4.23	3.9	1.11	1.11	1.42	2.3	1.27	2.1	1.75	2.44	0.98	0.89	1.16	1.2	1.52	1.61	1.26	1.1	1.35	1.49	3.25	3.53	3.13	4.21	3.52	3.38	1.57
ENSMMUG00000004713	0.28	0.25	0.16	0.27	0.38	0.48	0.27	0.5	0.2	0.28	0.26	0.26	0.36	0.25	0.48	0.42	0.2	0.36	0.33	0.34	0.42	0.23	0.4	0.5	0.36	0.46	0.21	0.38	0.28	0.45	0.5	0.65	0.67	0.73	0.67	0.67	0.59	0.58	0.84	0.75	0.54	1.01	0.49	0.83	1.25	0.75	0.79	0.81	0.44
ENSMMUG00000004726	0.73	0.68	0.51	0.41	0.21	0.22	0.32	0.58	0.46	0.62	0.61	0.35	0.38	0.44	0.52	0.34	0.19	0.33	0.34	0.41	0.33	0.43	0.31	0.31	0.18	0.21	0.38	0.3	0.63	0.46	0.51	0.67	1.41	2.37	3.13	1.1	0.59	1.64	0.43	0.65	0.21	0.51	0.51	0.28	0.81	0.27	0.53	0.53	1.24
ENSMMUG00000004739	0.08	0.04	0.02	0.05	0.01	0.01	0.08	0.01	0	0	0	0	0.04	0	0	0	0.01	0	0	0.05	0	0	0	0	0	0	0	0	0	0.07	0.03	0.03	0.59	0.52	0.14	0.63	0.3	0.49	0.62	0.25	0.05	0.04	0.13	0.02	0	0.07	0	0.03	0
ENSMMUG00000004741	0.25	0.41	0.34	0.3	0.35	0.31	0.4	0.39	0.4	0.48	0.78	0.48	0.74	0.52	0.68	0.96	0.28	0.17	0.61	0.46	0.55	0.35	0.21	0.23	0.29	0.37	0.46	0.31	0.24	0.51	0.48	0.21	116.57	108.02	73.55	101.26	78.11	89.98	74.75	80.09	0.78	0.92	0.85	0.72	1.11	0.68	0.59	1.24	0.64
ENSMMUG00000004742	2.31	1.97	1.32	1.5	1.61	1.32	1.85	1.91	2.3	3.04	4.5	3.79	5	4.16	3.88	4.95	1.62	2.35	2.63	3.38	2.18	2.7	1.71	1.38	0.96	1.71	1.85	0.83	1.58	1.17	1.67	1.51	223.08	247.78	176.62	199.44	179.66	187.12	204.21	170.09	2.34	3.25	2.97	2.23	3.83	4.09	2.96	4.63	3.03
ENSMMUG00000004746	0	0.03	0.06	0.03	0.03	0.13	0	0.03	0	0.04	0	0	0.1	0.07	0.05	0	0	0	0.25	0	0	0	0	0	0.04	0.04	0	0	0	0.06	0	0	24.14	41.53	8.65	11.46	6.79	7.29	4.32	7.62	1.19	1.55	1.52	1.49	1.07	1.67	1.77	2.11	1.29
ENSMMUG00000004747	0.04	0.03	0.06	0.03	0.08	0.04	0.1	0.01	0.01	0	0.02	0.04	0.02	0.01	0.13	0.03	0.01	0.1	0.01	0.09	0.01	0.07	0	0.03	0.05	0	0.03	0	0.02	0	0.04	0.06	1.91	2.31	2.07	2.13	2.26	1.84	1.84	2.38	1.27	1.32	1.05	0.98	1.14	1.08	1.19	1.44	1.01
ENSMMUG00000004752	0.3	0.13	0.22	0.15	0.15	0.15	0.15	0.08	0.09	0.18	0.14	0.2	0.13	0.16	0.28	0.25	0.15	0.2	0.16	0.12	0.07	0.2	0.06	0.15	0.33	0.11	0.14	0.11	0.14	0.12	0.28	0.15	0.58	0.09	0.05	0.05	0.07	0.12	0.13	0.07	0.22	0.12	0.11	0.21	0.13	0.18	0.17	0.11	0.36
ENSMMUG00000004755	0.13	0.12	0.48	0.3	0.27	0.18	0.15	0.22	0.4	0.64	0.68	0.37	0.7	0.46	0.48	0.64	0.38	0.33	0.49	0.63	0.42	0.44	0.45	0.39	0.28	0.19	0.17	0.21	0.18	0.25	0.15	0.1	0.14	0.18	0.2	0.2	0.3	0.27	0.19	0.18	0.62	0.65	0.44	0.44	0.47	0.41	0.32	0.53	0.86
ENSMMUG00000004764	3.16	3.64	6.34	2.8	2.75	2.57	5.99	4.58	4.56	4.65	7.45	4.8	7.71	7.98	6.46	8.16	5.09	3.73	7.36	4.62	8.5	7.39	8.52	7.68	8.37	7.36	11.98	8.03	8.39	12.45	9.21	11.18	11.31	13.14	12.36	11.19	11.15	13.98	14.3	12.68	5.63	5.14	8.63	7	7.49	7.61	9.57	9.92	3.78
ENSMMUG00000004768	0.11	0.14	0.16	0.1	0.07	0.07	0.24	0.33	0.01	0.03	0.3	0.18	0.37	0.33	0.62	1.28	0.01	0.04	0.12	0.19	0.25	0.23	0.37	0.53	0.08	0.07	0.05	0.18	0.08	0.33	0.15	0.33	3.53	5.23	4.81	5.24	6.37	8.4	7.43	9.19	0.07	0.12	0.48	0.33	0.72	0.45	0.58	1.23	0.05
ENSMMUG00000004769	0.03	0	0.05	0	0.03	0	0.01	0.01	0	0.02	0.02	0	0	0.03	0.02	0	0.05	0.04	0.04	0.01	0.03	0.03	0.04	0	0.07	0.04	0	0	0	0.05	0	0.03	0	0.02	0.02	0.02	0.05	0	0.09	0	0.16	0.03	0	0.05	0.01	0.24	0	0	0.02
ENSMMUG00000004772	0.06	0.05	0.08	0.04	0.09	0.07	0.01	0	0.04	0.06	0.03	0	0.05	0	0.08	0.06	0.04	0.06	0.08	0.03	0.02	0	0.04	0.08	0.07	0.13	0.09	0	0.11	0.05	0.09	0	0.09	0.09	0.05	0.1	0.09	0.1	0.14	0.1	0.1	0.06	0.13	0.07	0.03	0.03	0	0.14	0.11
ENSMMUG00000004773	0.02	0.01	0.05	0.02	0.01	0.04	0.02	0.02	0.03	0.01	0.03	0.02	0.01	0.03	0.04	0.04	0.02	0.01	0.05	0.01	0.03	0.04	0.01	0.04	0.03	0.01	0.02	0.02	0.03	0.06	0.01	0.04	0.05	0.05	0.02	0.03	0.03	0.03	0.02	0.05	0.02	0.03	0.01	0.01	0.01	0.06	0.01	0.01	0.02
ENSMMUG00000004778	6.22	5.91	7.38	5.64	6.44	6.46	5.68	6.6	5.68	9.8	6.02	5.22	10.29	6.3	5.71	7.07	4.07	4.4	4.86	4.02	5.76	3.96	3.69	5.05	4.8	6.48	42.24	25.36	22.03	9.54	18.6	9.22	26.12	19.05	25.6	18.61	10.06	10.6	10.79	15.02	3.19	3.56	4.73	3.74	4.62	4.13	4.77	4.39	5.11
ENSMMUG00000004782	2.44	4.2	1.94	2.61	3.12	2.64	2.87	2.46	1.82	1.51	1.55	1.99	1.62	1.03	1.01	1.53	1.05	2.66	2.15	1.81	0.9	1.52	0.55	1.62	2.58	2.39	1.03	1.5	2.27	2.11	1.48	1.53	6.12	9.64	9.24	11.02	5.47	3.25	8.03	4.58	1.9	1.58	1.8	1.87	1.15	1.22	2.21	1.91	1.79
ENSMMUG00000004786	0.17	0.29	0.21	0.49	0.43	0.42	0.3	0.3	0.11	0.07	0.04	0.12	0.1	0.07	0.02	0.06	0.01	0.14	0.04	0.16	0.06	0.03	0.01	0.03	0.03	0.18	0.1	0.23	0.15	0.07	0.1	0.09	0.09	0.3	0.09	0.49	0.05	0.09	0.08	0.1	0.04	0.14	0.06	0.16	0.04	0.02	0.02	0.03	0.07
ENSMMUG00000004787	0.01	0.02	0.13	0.04	0.03	0.01	0.03	0.02	0.12	0.17	0.23	0.11	0.14	0.33	0.27	0.29	0.06	0.12	0.2	0.25	0.01	0.23	0.07	0.06	0.03	0.07	0.06	0.04	0.01	0.05	0.02	0.03	0.26	0.33	0.31	0.22	0.3	0.12	0.23	0.35	0.35	0.52	0.52	0.28	0.5	0.71	0.46	0.52	0.52
ENSMMUG00000004795	0.05	0.06	0.06	0.06	0.02	0.05	0.03	0.04	0.27	0.09	0.31	0.19	0.26	0.22	0.2	0.2	0.03	0.06	0.09	0.1	0.01	0.05	0.09	0.08	0.13	0.02	0	0	0.01	0.08	0	0.02	0.06	0.07	0.02	0.1	0.06	0.07	0.03	0.01	0.03	0.03	0.03	0.04	0.07	0	0.07	0	0.13
ENSMMUG00000004796	0.2	0.07	0.04	0.15	0.13	0.16	0.08	0.14	0	0.46	0.28	0.1	0.95	0.08	0.17	0.36	0.06	0.02	0.24	0	0.13	0.06	0.06	0.13	0.08	0.08	1.76	0.82	0.75	1.66	0.65	0.39	9	5.19	1.96	3.8	0.48	0.87	0.9	0.89	0.06	0.04	0.08	0.02	0	0.04	0.05	0	0.05
ENSMMUG00000004809	0.63	0.6	0.34	0.61	0.56	0.5	0.4	0.47	0.57	0.53	0.19	0.34	0.66	0.14	0.21	0.36	0.13	0.65	0.37	0.28	0.55	0.32	0.25	0.54	0.58	0.65	0.18	0.11	0.33	0.36	0.44	0.26	1.3	1.37	0.85	1.48	0.94	1.29	0.77	1.15	1.46	0.67	0.79	0.89	1.27	0.74	1.17	0.36	0.64
ENSMMUG00000004812	0.17	0.29	0.14	0.21	0.21	0.28	0.2	0.18	0.08	0.06	0.02	0.12	0.02	0.2	0.09	0.15	0.09	0.18	0.25	0.16	0.08	0.23	0.09	0.05	0.11	0.17	0.1	0.25	0.35	0.28	0.42	0.41	0.22	0.36	0.29	0.33	0.19	0.33	0.2	0.26	0.44	0.48	0.11	0.29	0.21	0.46	0.21	0.29	0.75
ENSMMUG00000004815	0.11	0.02	0.02	0.02	0.01	0.02	0.05	0.01	0.08	0.15	0	0.13	0.17	0.1	0.03	0.02	0.02	0.06	0	0.03	0.11	0.03	0.01	0.29	0.17	0.03	0.04	0	0.22	0.13	0.05	0	0	0.04	0.02	0	0	0	0.14	0	0.06	0.1	0	0.06	0.05	0.08	0.26	0	0.31
ENSMMUG00000004817	1.62	1.59	1.56	0.98	0.92	0.92	0.78	1.32	3.28	3.56	3.42	3.59	2.67	2.86	3.71	4.16	1.76	2.15	1.85	2.65	2.02	1.88	2.04	1.47	1.66	2.06	0.74	0.62	0.47	1.29	1.12	1.21	0.97	0.57	0.5	0.26	0.43	0.64	0.41	0.8	1.73	1.52	1.71	1.7	0.84	1.33	1.41	1.32	2.43
ENSMMUG00000004822	0	0	0	0.02	0	0.04	0.01	0	0	0	0	0	0	0	0	0	0.01	0	0	0	0	0	0.01	0	0	0	0.02	0	0	0	0	0	0.38	0.34	0.41	0.34	0.07	0.21	0.04	0.14	0	0	0	0	0	0.01	0	0.02	0
ENSMMUG00000004823	0.15	0	0.03	0.2	0	0	0.12	0.06	0.04	0.33	0.21	0.1	0.1	0	0.13	0.14	0.5	0	0.06	0.16	0	0.32	0.28	0.06	0.19	0.12	0.54	0.05	0.18	0.71	0.18	0.54	0.11	0.21	0.27	0.27	0.1	0.05	0	0.36	0.65	0.06	0.04	0.08	0	0.13	0.36	0.72	0.08
ENSMMUG00000004830	0	0	0.05	0.04	0.04	0	0	0.04	0	0	0.2	0.03	0.03	0	0	0	0	0	0.19	0	0	0	0	0	0.02	0.05	0.16	0.13	0.06	0	0	0	0	0.05	0.07	0	0.03	0.06	0	0	0	0.11	0.08	0	0	0.12	0.07	0	0.05
ENSMMUG00000004831	0.18	0.32	8.28	0.09	0.47	0.89	0.1	0.13	0.31	0.34	18.72	0.72	2.22	2.23	1.18	0.45	0	0.55	25.04	0.41	2.02	3.76	0.09	0	0.03	0.45	13.3	0.43	0.38	1.67	0.05	0.1	0.09	0.09	6.23	0.03	0.99	0.63	0.24	0.18	0.24	0.4	16.53	0.57	1.73	2.44	0.33	0	0.2
ENSMMUG00000004835	0	0.17	0	0.03	0	0	0	0	0	0	0	0	0	0	0	0	0.06	0.18	0	0	0	0	0.03	0	0	0	0.05	0.11	0	0	0	0	0	0	0.08	0	0.11	0	0	0	0	0	0	0	0	0	0.04	0	0
ENSMMUG00000004836	0.04	0.03	0.02	0.03	0.01	0.02	0.01	0	0	0.04	0	0	0.01	0	0.01	0.01	0.01	0	0.02	0	0	0	0	0.02	0.02	0.03	0.02	0	0	0	0	0	0.02	0.06	0.03	0.08	0.01	0	0.1	0.03	0.11	0.03	0.05	0.02	0.01	0	0.01	0	0.01
ENSMMUG00000004837	0.01	0	0	0	0.02	0.01	0	0.02	0.02	0	0.02	0	0.01	0	0.01	0.01	0	0	0	0	0	0	0	0	0.02	0	0.06	0.01	0	0.03	0	0.03	0.03	0.01	0.02	0.01	0.01	0.01	0	0.03	0.01	0.02	0.02	0	0.02	0.03	0	0.01	0.05
ENSMMUG00000004838	0.37	0.03	0.34	0.1	0.18	0.03	0.48	0.03	0.06	0.49	0.85	0.53	0.19	0.33	0.19	0.28	0.07	0.03	0.29	0.3	0.17	0.39	0.26	0.09	0.28	0.42	0.73	0.32	0.26	0.78	0.56	0.54	0.21	0.2	0.02	0.1	0	0.1	0.06	0.27	0.08	0	0.35	0.27	0.12	0.2	0.44	0.35	0.32
ENSMMUG00000004839	0.32	0.23	0.16	0.12	0.1	0.1	0.07	0.12	0.21	0.29	0.12	0.13	0.1	0.1	0.16	0.1	0.23	0.19	0.16	0.18	0.11	0.15	0.07	0.14	0.2	0.17	0.13	0.11	0.09	0.06	0.07	0.08	0.33	0.22	0.13	0.15	0.15	0.12	0.08	0.14	0.28	0.26	0.11	0.11	0.07	0.14	0.13	0.15	0.46
ENSMMUG00000004842	0.2	0.19	0.22	0.22	0.28	0.24	0.25	0.27	0.24	0.17	0.14	0.22	0.21	0.34	0.32	0.26	0.28	0.25	0.44	0.18	0.16	0.21	0.22	0.39	0.46	0.35	0.16	0.17	0.15	0.25	0.37	0.23	1.11	1.09	1.78	1.1	0.92	1.11	1.51	1.3	1.37	1.01	0.72	0.77	0.51	0.49	0.69	0.69	0.99
ENSMMUG00000004843	40.9	35.05	48.26	50.7	56.45	47.64	40.89	48.72	31.09	41.3	118.61	94.74	135.47	164.87	132.19	99.16	76.18	61.56	164.14	145.8	204.48	224.88	297.08	250.53	71.39	45.5	69.3	46.32	52.14	59.33	60.55	58.95	357.78	383.84	358.22	390.97	580.89	574.97	494.49	484.18	389.37	295.92	438.91	496.6	475.85	509.62	442.59	493.66	67.62
ENSMMUG00000004844	0.34	0.39	0.76	0.42	0.21	0.3	0.47	0.72	0.13	0.12	0.37	0.27	0.21	0.32	0.47	0.28	0.37	0.23	0.49	0.28	0.38	0.63	0.67	0.66	0.84	0.85	1.58	1.64	0.69	1.67	1.23	1.55	13.41	10.68	8.16	8.91	9.28	9.95	7.69	8.66	1.92	1.38	2.87	3.06	2.51	2.29	2.92	2.49	1.05
ENSMMUG00000004851	2.45	2.61	2.17	1.82	1.98	1.82	1.79	2.09	1.69	1.75	1.12	1.71	0.84	1.03	1.3	1.43	2.19	2.43	1.02	1.47	1.46	1.43	0.97	1.2	2.04	2.23	1.73	1.79	2.4	1.87	2.4	2.45	4.78	6.74	3.07	3.71	2.59	3.31	4.71	5.41	3.54	3.43	2.55	2.73	3.12	3.89	3.84	3.71	4.23
ENSMMUG00000004853	0.18	0.16	1.02	0.27	0.03	0.14	0.17	0.19	4.47	2.57	2.35	2.86	2.85	3.53	3.26	3.35	1.68	1.74	2.64	2.08	1.93	1.84	2.28	2.04	1.73	1.38	1.74	0.27	0.34	0.76	0.89	0.66	0	0	0.06	0.03	0.27	0.3	0	0	3.01	3.24	3.21	3.49	3.06	3.93	2.79	4.3	2.78
ENSMMUG00000004854	0.06	0.07	0.06	0.07	0.06	0.04	0.06	0.07	0.06	0.04	0.02	0.03	0.06	0.05	0.07	0.04	0.03	0.04	0.02	0.08	0.02	0.02	0.03	0.14	0.08	0.05	0.07	0.09	0.08	0.06	0.12	0.04	0.13	0.09	0.18	0.15	0.13	0.14	0.23	0.19	0.22	0.2	0.19	0.28	0.38	0.23	0.36	0.31	0.13
ENSMMUG00000004858	0.08	0.06	0	0.02	0.03	0.05	0.08	0.09	0.07	0.14	0	0.23	0.17	0.09	0.09	0.14	0.09	0	0.09	0.06	0.13	0.08	0.24	0.13	0.08	0.05	0.2	0.02	0.04	0.12	0.05	0.08	0.17	0.13	0.05	0.02	0.07	0.02	0	0	0.01	0.18	0.17	0.04	0	0.02	0.01	0.05	0.09
ENSMMUG00000004860	0	0	0	0	0	0	0	0	0	0	0	0	0	0	0	0	0	0	0	0	0	0	0	0	0	0	0	0	0	0	0	0	4.57	2.57	1.25	2.17	0.62	0.86	0.46	0.94	0.13	0.43	0.35	0.19	0.33	0.68	0.67	0.25	0.38
ENSMMUG00000004864	0.16	0.15	0.05	0.07	0.1	0.08	0.01	0.07	0.06	0.06	0.06	0.04	0.05	0	0.03	0.02	0	0.01	0.05	0.1	0.06	0.05	0	0.08	0.11	0.04	0.04	0.13	0.02	0	0.07	0.22	0.18	0.1	0.01	0.15	0.11	0.13	0	0.03	0.1	0.07	0	0.08	0.1	0.05	0.08	0.05	0.1
ENSMMUG00000004867	10.06	5.12	6.03	2.28	2.73	1.7	3.81	3.02	5.31	16.13	9.99	8.69	21.72	10.57	23.81	14.41	19.29	15.98	16.02	12.13	22.51	16.49	22.6	12.74	9.54	7.84	14.59	4.01	9.14	11.56	8.47	8.26	16.88	14.15	10.04	9.24	16.36	8.98	16.16	16.66	13.64	7.73	9.92	4.33	20.23	9.98	8.92	8.71	18.93
ENSMMUG00000004872	0.65	0.59	0.49	0.43	0.38	0.61	0.86	0.72	0.43	0.63	0.51	0.43	0.4	0.37	0.7	0.84	0.74	0.32	0.72	0.39	0.25	0.44	0.45	0.31	0.56	0.73	0.6	0.43	0.17	0.94	0.7	0.46	6.73	7.67	5.95	6.76	6.37	7.18	7.49	7.09	6.11	6.38	5.51	5.23	6.79	5.34	7.94	8.7	6.21
ENSMMUG00000004879	0.03	0.03	0.04	0.02	0.02	0.01	0.02	0.04	0.04	0.03	0.02	0.02	0.02	0.01	0.01	0.02	0	0.04	0.02	0.04	0.02	0.02	0.01	0.01	0.03	0.04	0.02	0.05	0.04	0.01	0.01	0.01	0.04	0.02	0.04	0.03	0.03	0.03	0.01	0.01	0.05	0.03	0	0.01	0.04	0.05	0.04	0	0.06
ENSMMUG00000004880	0.23	0.19	0.58	0.24	0.27	0.18	0.38	0.26	0.96	1.18	1.18	0.49	0.59	0.48	0.73	0.22	0.86	0.74	0.56	0.69	0.35	0.31	0.6	0.31	0.93	0.5	0.2	0.06	0.24	0.23	0.24	0.17	0.16	0.05	0.14	0.09	0.05	0.08	0.09	0.02	1.61	1.46	0.53	0.42	0.59	0.42	1.23	0.3	1.34
ENSMMUG00000004881	0.2	0.16	0.09	0.18	0.04	0.09	0.14	0.14	0.05	0.06	0.02	0.02	0.04	0.07	0.14	0.06	0.07	0.03	0.04	0.04	0.13	0.09	0.04	0.07	0.18	0.23	0.49	0.43	0.28	0.47	0.36	0.16	0.51	0.47	0.57	0.63	0.46	0.47	0.38	0.4	0.12	0.19	0.72	0.35	0.16	0.39	0.6	0.29	0.4
ENSMMUG00000004882	0.02	0.02	0.03	0.01	0	0.02	0.01	0	0.01	0.02	0.03	0	0.04	0.02	0.02	0.02	0	0.02	0.04	0.01	0.05	0	0.02	0.03	0.01	0.01	0.05	0.05	0.02	0.02	0	0.02	0.09	0.04	0.06	0.09	0.04	0.06	0.02	0.03	0.03	0.03	0	0.01	0	0.02	0	0.01	0
ENSMMUG00000004884	1.52	1.83	3.52	1.97	1.54	1.86	9.52	2.2	1.53	2.29	2.82	2.22	2.35	2.77	19.47	2.71	0.67	0.8	1.95	1.12	1.3	2.27	12.02	2.25	1.42	2.15	1.48	1.18	0.38	2.16	12.1	1.78	2.25	2.02	1.89	1.54	2.5	1.79	10.87	2.21	0.91	1.52	1.79	1.79	1.44	1.74	10.12	1.37	1.34
ENSMMUG00000004886	5.66	5.43	4.81	3.51	2.25	3.02	3.06	3.9	8.48	8.26	6.12	6.25	5.79	5.98	5.36	4.97	6.78	6.42	5.64	5.26	3.78	4.37	3.44	3.89	6.24	6.07	4.8	4.35	3.34	4.65	5.34	3.98	5.98	7.54	8.95	6.43	5.21	4.61	6.36	3.96	29.62	35.73	17.48	16.68	15.32	18.16	11.9	10.79	35.88
ENSMMUG00000004890	0.25	0.34	0.44	0.38	0.12	0.18	0.23	0.24	0.26	0.29	0.34	0.22	0.18	0.4	0.22	0.24	0.3	0.23	0.56	0.23	0.11	0.2	0.29	0.45	0.27	0.29	0.61	0.35	0.29	0.86	0.49	0.7	0.19	0.15	0.2	0.26	0.14	0.18	0.17	0.26	0.09	0.1	0.27	0.26	0.12	0.18	0.35	0.2	0.37
ENSMMUG00000004895	0	0.02	0	0.01	0	0.02	0.01	0	0.01	0.01	0	0.01	0.03	0	0.01	0.01	0	0.04	0.01	0.03	0.03	0	0.05	0.01	0	0	0.01	0.01	0.01	0.01	0.02	0	0.02	0.01	0.04	0.04	0.01	0.03	0.01	0.01	0.01	0.03	0.01	0.01	0	0.01	0	0.01	0.02
ENSMMUG00000004907	0.18	0.2	0.1	0.2	0.06	0.13	0.18	0.12	0.15	0.16	0.3	0.27	0.23	0.38	0.27	0.33	0.06	0.13	0.08	0.31	0.15	0.17	0.22	0.11	0.16	0.22	0.23	0.25	0.24	0.23	0.08	0.28	0.61	0.61	0.46	0.53	0.48	0.46	0.54	0.85	0.39	0.51	1.13	0.66	0.76	0.65	0.6	0.87	0.63
ENSMMUG00000004913	32.15	28.51	48.9	33.85	28.12	42.1	16.45	23.07	52.92	203.32	89.57	59.92	246.64	107.17	63.89	106.46	28.45	39.92	45.23	25.38	69.54	32.15	21.33	62.85	31.95	55.7	801.51	491.87	436.72	147.34	296.7	115.55	372.17	230.49	333.1	229.48	68.14	110.04	86.13	159.13	15.97	9.37	32.03	15.1	18.56	38.47	11.58	16.86	52.14
ENSMMUG00000004914	0.02	0.16	0	0	0	0.04	0.06	0.06	0	0	0	0	0.03	0.04	0.03	0.03	0	0	0.04	0	0	0	0	0	0.05	0.05	0	0	0	0	0	0.15	0.03	0	0.07	0.03	0	0.09	0.03	0	0	0.02	0	0	0.04	0	0.02	0	0.08
ENSMMUG00000004916	0	0	0	0.05	0.23	0.05	0.19	0.1	0.18	0.4	0.26	0.25	0.16	0.31	0	0.07	0.19	0.05	0.15	0.45	0	0	0.05	0.05	0.19	0.06	0.08	0.08	0.45	0.09	0	0.19	0.19	0.14	0	0.03	0.44	0.03	0.19	0	0.1	0.13	0.04	0.11	0.24	0.29	0	0.12	0.13
ENSMMUG00000004919	0.04	0.04	0.01	0.06	0.07	0.09	0.05	0.05	0.05	0.08	0.04	0.12	0.04	0.11	0.08	0.07	0.07	0.1	0.05	0.1	0.08	0.12	0.09	0.02	0.04	0.07	0.03	0.08	0.02	0.13	0.04	0.02	0.48	0.25	0.24	0.43	0.23	0.47	0.24	0.32	0.19	0.18	0.12	0.13	0.08	0.13	0.08	0.03	0.14
ENSMMUG00000004930	0.33	0.4	0.38	0.23	0.12	0.22	0.19	0.25	0.29	0.38	0.37	0.29	0.36	0.38	0.4	0.4	0.18	0.22	0.35	0.27	0.41	0.39	0.38	0.32	0.34	0.33	0.47	0.27	0.36	0.29	0.37	0.25	0.21	0.27	0.78	0.39	0.48	0.21	0.53	0.35	0.36	0.39	0.93	0.57	0.53	0.46	0.46	0.55	0.35
ENSMMUG00000004937	0.47	0.76	0.82	1.23	0.73	0.89	0.79	0.63	0.93	0.13	0.55	0.78	0.48	0.69	0.43	0.64	0.27	0.18	1.07	0.79	0.43	0.47	0.12	0.27	0.32	0.84	1.17	1.21	0.89	1.28	0.93	0.78	0.87	0.89	1.63	1.15	0.84	0.81	0.72	0.74	0.23	0.75	1.21	1.01	0.85	0.75	1.12	1.28	0.44
ENSMMUG00000004943	0.02	0.03	0.02	0.01	0.01	0.01	0	0.01	0	0.01	0	0.02	0.05	0.02	0.08	0.04	0	0.06	0.01	0.04	0	0.02	0.09	0.01	0.01	0.01	0.04	0	0.01	0	0.04	0.07	0.03	0.02	0.01	0	0.04	0.09	0.15	0.07	0.04	0.02	0	0.01	0.1	0.02	0.03	0	0.02
ENSMMUG00000004947	0.06	0.02	0.01	0.01	0.03	0.03	0.03	0.13	0.06	0	0	0.01	0	0	0.03	0.03	0.01	0.01	0	0	0.01	0.01	0	0.09	0.1	0.07	0.07	0	0.02	0	0.06	0.11	0.07	0.02	0.03	0.01	0	0.01	0.07	0	0.06	0.05	0	0.01	0.03	0.02	0.06	0.1	0.14
ENSMMUG00000004953	0.25	0.1	0.26	0.26	0.25	0.29	0.19	0.33	0.53	0.4	0.31	0.11	0.28	0.36	0.35	0.32	0.38	0.3	0.31	0.3	0.25	0.28	0.38	0.08	0.32	0.31	0.24	0.08	0.1	0.12	0.21	0.02	1.01	1.34	1.09	1.41	0.78	0.53	1.06	0.47	2.06	3.59	2.33	2.74	1.81	2.05	2.51	1.61	2.3
ENSMMUG00000004957	1.85	1.68	1.6	1.83	3.1	2.94	3.61	2.15	2.02	1.29	1.6	1.63	1.32	1.22	1.11	1.9	1.64	1.68	1.84	1.34	1.36	1.74	0.75	0.84	2.27	2.23	0.94	1.64	0.76	1.38	1.55	1.65	3.07	3.37	3.46	2.71	2.45	2.41	2.85	2.1	5.59	7.49	4.65	5.44	3.19	6.11	5.08	4.99	7.1
ENSMMUG00000004968	0.73	0.75	0.98	1.1	2.07	2.22	1.25	1.35	0.7	0.79	1.3	1.24	1.37	1.8	1.43	0.97	0.5	0.53	0.96	0.98	0.67	1.05	0.54	0.31	0.73	0.69	0.55	0.54	0.66	0.73	1.03	0.36	34.05	40.19	39.65	39.92	28.56	41.56	36.05	31.06	5.81	8.87	9.71	9.34	8.98	10.49	8.04	6.65	3.1
ENSMMUG00000004969	0	0.02	0.04	0.02	0	0.01	0.02	0.01	0.06	0.07	0.06	0.01	0	0	0.01	0.04	0.01	0	0	0.03	0	0.03	0	0.05	0.02	0.03	0	0	0.01	0	0.02	0	0.07	0.04	0	0.02	0.06	0.01	0	0.07	0.03	0.18	0	0.04	0	0.02	0	0	0.32
ENSMMUG00000004971	0.01	0	0.01	0	0	0	0	0.01	0.02	0	0	0.02	0.01	0.02	0.01	0.01	0	0	0	0.02	0	0.01	0	0	0.01	0.03	0.02	0	0.01	0.04	0	0.02	0.06	0.04	0.05	0.03	0.03	0.08	0.04	0.02	0	0	0	0	0.03	0.02	0.02	0.02	0.03
ENSMMUG00000004974	1.66	1.29	1.17	1.07	0.67	1.17	2.01	1.9	0.6	0.96	1.38	1.15	1.41	2.34	2.76	2.14	0.84	1.09	1.5	1.59	1.29	1.77	3.23	1.61	1.01	0.97	1.66	1.48	1.38	1.87	1.38	2.4	2.73	1.91	1.87	2.1	4.3	5.66	4.67	3.19	1.26	0.85	2.1	1.45	2.07	3.63	3.02	2.8	1.63
ENSMMUG00000004975	0	0.03	0.01	0.01	0.02	0.01	0.02	0.03	0.02	0.02	0	0.01	0	0.08	0.04	0.02	0.01	0.03	0	0.02	0.01	0.03	0	0	0.02	0.01	0.02	0.04	0	0.03	0.01	0.05	0.05	0.04	0.16	0.07	0.12	0.09	0.13	0.15	0.11	0.02	0.15	0.09	0.45	0.18	0.16	0.32	0.13
ENSMMUG00000004976	0.05	0.01	0.18	0.07	0.06	0.09	0.14	0.11	0.07	0.07	0.19	0.09	0.31	0.38	0.14	0.09	0.06	0.12	0.28	0.19	0.28	0.66	0.49	0.51	0.07	0.11	0.08	0.08	0.02	0.05	0.15	0.05	0.11	0.13	0.12	0.18	0.22	0.05	0.07	0.2	0.18	0.12	0.51	0.48	1.26	0.94	1.38	1.13	0.14
ENSMMUG00000004978	0.1	0.05	0.02	0.06	0.05	0.06	0.12	0.05	0.21	0.3	0.07	0.17	0.18	0.13	0.28	0.18	0.1	0.22	0.09	0.18	0.07	0.18	0.31	0.23	0.03	0.02	0.04	0.02	0.03	0.06	0.14	0.09	0.01	0.03	0.03	0.07	0.05	0.03	0.04	0.01	0	0.05	0.02	0.03	0	0	0.09	0.05	0.17
ENSMMUG00000004980	0.05	0.04	0.06	0.03	0.08	0.07	0.01	0.04	0.07	0.16	0.07	0.05	0.28	0.08	0.03	0.08	0.04	0.07	0.08	0.04	0.15	0.07	0.02	0.06	0.06	0.08	0.46	0.32	0.24	0.18	0.23	0.13	0.51	0.34	0.43	0.22	0.12	0.12	0.13	0.17	0.04	0.02	0.03	0.05	0.04	0.03	0.01	0.03	0.06
ENSMMUG00000004996	14.75	15.25	11.82	17.65	14.74	10.11	10.15	13.9	3.44	4.24	5.51	6.09	6.9	5.39	6.69	10.04	5.07	6.85	4.63	6.6	6.43	4.97	7.69	8.17	8.37	10.72	6.21	13.41	12.43	7.39	9.05	11.55	0.04	0.11	0.14	0.04	0.07	0	0.03	0.05	8.46	13.13	3.95	7.06	4.5	3.06	7.49	6.87	10.02
ENSMMUG00000005008	0.45	0.41	0.13	0.23	0.08	0.15	0.29	0.15	0.22	0.38	0.16	0.19	0.25	0.25	0.24	0.38	0.3	0.2	0.16	0.37	0.28	0.21	0.3	0.19	0.26	0.47	0.45	0.3	0.26	0.24	0.3	0.3	2.15	2.39	1.31	1.55	1.52	1.42	1.69	1.91	0.33	0.34	0.42	0.43	0.31	0.39	0.65	0.4	0.28
ENSMMUG00000005014	0.07	0.22	0.04	0.16	0.23	0.09	0.21	0	0.11	0.09	0.23	0.33	0.03	0.14	0.15	0.39	0.49	0.02	0.36	0.2	0.14	0.25	0.39	0.3	0.03	0.08	0.07	0.11	0.16	0.24	0.04	0.17	0.44	0.28	0.14	0.13	0	0.11	0.24	0.31	0.14	0.3	0.54	0.41	0	0.11	0.32	0.39	0.25
ENSMMUG00000005015	0.13	0.05	0.1	0.12	0.15	0.19	0.05	0.09	0.09	0.05	0.06	0.03	0.11	0.15	0.1	0.16	0.07	0.09	0.05	0.07	0.06	0.06	0	0	0.07	0.07	0.03	0.09	0	0	0.11	0	0.06	0.11	0.05	0.02	0.22	0.16	0.09	0.08	0.05	0.03	0.07	0.03	0.06	0.02	0.06	0	0.17
ENSMMUG00000005019	0.66	0.52	0.46	0.39	0.43	0.53	0.52	0.4	0.4	0.44	0.36	0.35	0.21	0.21	0.35	0.28	0.84	1.02	0.48	0.2	0.32	0.69	0.54	0.27	0.75	0.66	0.63	0.49	0.25	0.31	0.48	0.47	0.1	0.05	0.13	0.08	0.01	0.07	0.16	0.11	0.55	0.35	0.08	0.13	0.37	0.2	0.29	0.28	0.42
ENSMMUG00000005026	0.46	0.14	0.02	0.24	0.07	0.17	0.19	0.3	0.16	0.56	0.33	0.49	0.44	0.22	0.43	0.33	0.16	0.21	0.13	0.2	0.15	0.14	0.18	0.35	0.04	0	0.09	0.15	0.05	0.02	0.16	0.02	4.42	5.79	3.56	3.99	4.23	4.63	3.4	3.49	0.12	0	0.09	0.02	0.02	0.06	0.04	0.04	0.47
ENSMMUG00000005028	0.39	0.22	0.36	0.28	0.23	0.28	0.33	0.37	1.26	0.93	1.11	0.87	1.15	1.01	1.14	0.91	1.05	0.93	0.97	0.71	0.78	1	0.71	0.76	0.56	0.59	0.36	0.21	0.3	0.29	0.28	0.28	0.41	0.3	0.42	0.43	0.28	0.41	0.32	0.43	1.29	1.46	1.34	0.97	1.24	1.58	1.31	1.21	1.28
ENSMMUG00000005034	0.01	0.06	0.02	0.02	0.01	0.03	0.06	0.01	0.04	0.08	0.03	0.09	0.07	0.04	0.08	0.07	0.2	0.02	0.06	0.02	0.09	0.04	0.02	0.03	0.07	0.02	0.03	0.01	0.03	0.03	0.05	0	0.05	0.01	0.02	0.05	0.07	0.01	0.01	0.07	0.13	0.03	0.01	0.02	0.15	0.03	0.03	0.05	0.08
ENSMMUG00000005035	0.1	0.17	0.19	0.13	0.08	0.09	0.07	0.04	0.19	0.2	0.11	0.13	0.03	0.06	0.08	0.09	0.11	0.08	0.12	0.1	0.17	0.03	0.02	0.05	0.12	0.09	0.14	0.1	0.22	0.11	0.19	0.27	0.21	0.19	0.17	0.18	0.1	0.07	0.07	0.1	0.28	0.17	0.19	0.16	0.13	0.11	0.16	0.12	0.1
ENSMMUG00000005048	0.08	0.12	0.13	0.1	0.14	0.14	0.13	0.17	0.11	0.06	0.08	0.2	0.14	0.17	0.11	0.12	0.06	0.06	0.12	0.07	0.16	0.16	0.01	0.21	0.08	0.19	0.14	0.31	0.19	0.18	0.23	0.2	0.98	1.65	1.75	2.67	2.01	3.32	2.58	2.88	0.08	0.2	0.21	0.4	0.23	0.32	0.21	0.37	0.18
ENSMMUG00000005050	0.04	0.07	0.03	0.08	0.14	0.14	0.04	0.11	0.03	0.07	0.04	0.09	0.02	0.04	0.01	0.05	0.06	0.02	0.05	0.09	0.01	0.05	0.02	0.14	0.05	0.12	0	0.07	0.05	0.02	0.11	0.04	0.11	0.12	0.23	0.11	0.28	0.18	0.15	0.27	0.06	0.19	0.03	0.07	0.02	0.12	0.04	0.15	0.07
ENSMMUG00000005054	1.99	1.42	1.69	1.97	2.19	3.16	1.97	1.9	0.81	0.69	0.92	1.19	0.93	1.05	1.2	0.93	0.56	0.43	1.28	1.48	0.72	1.21	1.36	0.92	1.06	1.12	2.76	2.32	2.36	1.97	2.45	3.08	2.02	1.62	2.64	1.86	2	2.9	2.34	2.18	0.93	1.02	1.94	1.34	1.15	1.57	1.61	1.76	0.85
ENSMMUG00000005056	1.52	2.22	1.21	1.09	1.08	1.62	1.55	1.76	1.25	1.44	1.9	1.61	2.23	2.86	2.35	2.71	1.37	1.39	1.9	2.48	2.27	3.58	3.09	2.16	0.86	1.05	1.47	0.9	2.02	1.92	2.13	1.29	0.65	0.87	0.99	1.26	0.95	1.18	1.03	0.69	1.04	1.09	1.22	1.95	1.53	2.5	1.22	1.73	1.35
ENSMMUG00000005057	1.54	1.1	0.74	0.88	1.47	0.87	1.27	1.46	1.67	0.79	0.55	0.83	1.45	0.56	0.82	0.88	0.71	1.42	1.14	0.41	0.79	1.11	0.42	1.4	0.84	1.15	0.68	0.19	0.45	0.48	0.99	0.72	4.08	4.81	2.82	2.86	2.2	2.03	4.25	1.36	1.68	3.57	2.04	1.39	2.62	1.49	2.2	2.04	5.15
ENSMMUG00000005064	0	0	0	0	0	0	0	0	0	0	0	0	0	0	0	0	0	0	0	0	0	0	0	0	0	0	0	0	0	0	0	0	0.02	0.03	0.05	0.03	0.06	0.02	0.01	0.02	0.02	0.01	0.01	0	0.02	0.07	0.04	0.04	0.08
ENSMMUG00000005066	0.87	0.93	1.73	0.77	0.92	1.08	0.87	0.77	6.22	6.48	3.17	3.64	2.3	2.74	2.96	2.92	4.15	2.86	2.39	2.68	1.53	1.75	1.76	1.83	2.36	2.63	1.11	0.83	0.66	0.75	1.04	0.69	0.25	0.18	0.24	0.3	0.17	0.32	0.32	0.29	2.06	1.56	1.14	1.6	1.07	1.16	1.59	1.47	6.42
ENSMMUG00000005068	0.06	0.01	0.06	0.03	0.02	0.07	0.08	0.04	0	0.02	0.04	0.05	0.03	0.08	0.1	0.02	0.04	0.01	0.02	0.02	0.03	0.14	0.01	0.02	0.06	0.03	0.03	0.04	0	0.03	0.08	0.06	0.04	0.02	0.03	0.05	0	0.08	0.06	0.09	0.06	0.01	0.02	0.06	0.03	0.01	0.03	0.11	0.05
ENSMMUG00000005069	0	0.01	0	0.02	0.01	0	0.01	0.02	0.01	0.01	0.14	0.01	0.11	0.15	0.12	0.09	0.03	0.02	0.03	0.05	0.06	0.01	0.02	0.02	0.01	0.01	0	0.01	0.01	0.02	0.03	0	0	0.02	0.09	0.04	0.05	0.05	0.05	0.07	0.03	0.03	0.06	0.05	0.06	0.1	0.08	0.07	0.02
ENSMMUG00000005075	1.02	1.46	1.16	0.99	0.96	0.75	0.55	1.26	1.24	1.37	1.6	0.96	1.43	1.8	1.42	1.9	1.39	0.57	0.97	1.21	1.57	0.74	1.54	1.03	1.54	1.21	0.69	0.68	1.06	1.48	0.69	1.51	1.81	1.58	1.45	1.8	1.12	2.04	1.1	1.16	0.9	0.6	1.42	1.09	0.79	0.53	0.93	1.01	1.11
ENSMMUG00000005079	0.05	0	0	0	0	0.1	0	0.05	0	0	0	0	0.08	0	0	0	0	0	0	0	0	0	0	0	0	0.13	0	0.09	0	0.47	0	0.2	0	0.37	0.07	0.07	0.23	1.02	0.08	0	0	0	0	0.07	0	0	0	0.06	0
ENSMMUG00000005084	0.11	0.14	0.17	0.24	0.17	0.15	0.16	0.14	0.13	0.19	0.1	0.17	0.23	0.12	0.11	0.15	0.13	0.03	0.16	0.16	0.19	0.16	0.07	0.07	0.11	0.16	0.05	0.15	0.04	0.15	0.12	0.03	0.83	1.12	1.82	0.84	1.07	1.48	0.72	1.27	1.61	1.46	1.81	1.17	1.94	2.37	1.68	1.33	1.16
ENSMMUG00000005095	0.03	0.03	0	0.03	0.02	0.03	0.01	0.02	0.05	0.07	0.06	0.05	0.03	0.02	0.08	0	0.04	0.04	0.04	0	0.01	0.02	0.01	0	0.01	0.13	0.01	0	0.07	0	0.04	0.04	0.14	0.25	0.24	0.14	0.09	0.18	0.12	0.07	0.04	0.02	0	0.1	0.02	0.24	0.05	0.09	0.02
ENSMMUG00000005102	0.03	0.05	0.05	0.05	0.02	0.07	0.1	0.02	0.02	0.04	0.06	0.02	0.12	0.02	0.01	0.04	0.14	0.03	0.03	0.02	0.1	0.05	0.01	0.17	0.04	0.06	0.04	0.07	0	0.03	0	0	0.1	0.27	0.19	0.2	0.15	0.29	0.18	0.21	0.12	0.25	0.33	0.35	0.34	0.53	0.26	0.05	0.1
ENSMMUG00000005109	0.53	0.29	0.49	0.31	0.24	0.47	0.39	0.33	0.49	0.63	0.31	0.31	0.26	0.57	0.53	0.21	0.31	0.29	0.5	0.5	0.13	0.37	0.47	0.36	0.64	0.4	0.46	0.28	0.19	0.25	0.33	0.24	0.76	0.64	0.46	0.87	0.65	0.76	0.85	0.73	0.34	0.42	0.73	0.27	0.43	0.36	0.46	0.51	0.57
ENSMMUG00000005116	0.13	0	0	0.2	0	0.26	0	0.13	0.11	0.23	0	0	0	0	0	0.39	0.21	0	0	0	0.05	0.05	0	0	0	0.34	0	0	0	0.63	0	0.17	0	0	0	0.06	0	0.1	0.77	0	0.17	0	0	0	0.18	0.44	0.21	0.46	0.23
ENSMMUG00000005117	0.02	0.02	0.06	0.07	0.05	0.02	0.01	0.01	0.1	0.08	0.09	0.16	0.2	0.02	0.06	0.06	0.03	0.1	0.15	0.04	0.09	0.15	0.11	0.08	0.07	0.05	0.05	0.04	0.02	0.04	0.04	0.04	0.24	0.18	0.17	0.3	0.27	0.17	0.04	0.32	0.04	0.17	0.18	0.26	0.15	0.37	0.14	0.17	0.06
ENSMMUG00000005124	0.08	0.18	0.24	0.18	0.04	0.07	0.03	0.13	0.09	0.11	0.06	0.02	0.09	0.07	0.03	0.03	0.15	0.04	0.05	0.07	0	0.02	0.02	0.1	0.13	0.07	0.19	0.1	0.02	0	0.14	0.09	0.45	0.45	0.42	0.3	0.56	0.35	0.43	0.24	0.56	0.53	0.96	0.47	0.24	0.33	0.56	0.27	0.46
ENSMMUG00000005129	0.03	0.02	0.1	0.09	0.05	0.03	0.01	0.07	0.2	0.13	0.07	0.18	0.11	0.17	0.15	0.06	0.07	0.19	0.14	0.17	0.17	0.01	0.18	0.11	0.12	0.16	0.07	0.05	0.08	0.17	0.11	0	1.87	2.33	2.3	1.69	3.85	4.32	2.76	2.11	0.56	0.21	0.1	0.13	0.21	0.27	0.1	0.02	0.59
ENSMMUG00000005134	1.28	1.44	4.33	0.61	0.78	0.99	1.12	1.9	8.23	5.9	7.49	7.54	7.03	9.35	8.08	8.97	4.72	2.98	5.68	4.13	3.73	5.59	6.43	7.06	4.66	6.2	5.69	1.75	2.46	3.2	3.78	2.45	0.15	0.16	0.15	0.13	0.19	0.08	0.15	0.18	15.1	24.21	22.58	26.4	13.13	18.89	17.05	24.84	7.91
ENSMMUG00000005139	0.29	0.16	0.22	0.22	0.17	0.16	0.32	0.18	0.11	0.18	0.16	0.35	0.25	0.19	0.11	0.26	0	0.08	0.18	0.11	0.37	0	0	0.13	0.13	0.18	0.06	0	0.1	0.06	0	0.09	0.32	0.23	0.43	0.3	0.59	0.33	0.55	0.53	0	0.13	0.06	0.18	0.19	0.11	0.04	0.11	0.08
ENSMMUG00000005147	0.33	0.47	0.79	0.19	0.11	0.24	0.31	0.4	1.71	2.26	2.15	2.26	1.51	1.73	1.95	2.62	0.95	0.51	1.03	1.6	1.53	1.35	1.45	1.38	1.3	0.7	0.9	0.49	0.29	0.53	0.73	0.25	0.19	0.1	0.05	0.03	0.06	0.03	0.01	0.05	2.18	1.17	1.33	1.78	0.9	1.56	1.33	1.16	1.79
ENSMMUG00000005150	5.51	9.79	6.27	4.23	4.62	4.09	6.43	5.06	11	7.39	5.44	5.54	3.87	4.61	6.56	5.65	6.32	11.41	6.75	6.35	4.18	6.2	4.63	3.24	5.2	10.17	6.45	4.25	4.88	5.17	8.56	5.84	2.29	4.58	2.22	2.37	2.65	2.19	2.28	2.3	5.01	8.28	3.93	2.31	3.4	6.48	5.02	3.26	6.78
ENSMMUG00000005151	0.03	0	0	0	0.04	0.03	0.02	0.01	0.02	0	0	0.01	0.01	0	0	0.03	0	0.03	0.06	0.01	0	0.01	0	0.03	0.02	0	0	0	0	0	0.01	0	0.01	0	0.03	0	0.05	0	0.02	0.02	0	0.01	0.02	0.12	0	0.01	0	0	0.05
ENSMMUG00000005159	5.17	4.37	4.55	12.69	4.28	4.95	4.19	5.14	3.13	3.42	3.67	9.47	3.9	3.74	3.57	3.51	2.88	1.94	3.21	10.87	2.57	2.54	2.63	3.03	3.86	3.01	4.02	10.28	3.76	3.96	3.95	4.35	10.78	11.37	12.6	16.78	9.6	10.21	11.72	10.6	6.97	8.71	7.9	13.84	6.42	8.98	8.19	8.15	6.38
ENSMMUG00000005160	0.37	1.37	0.56	0.31	0.25	0.58	0.45	0.75	1.71	0.8	0.69	0.66	0.58	1.34	1.16	1.42	0.63	1.13	0.35	0.65	0.46	1.61	0.44	0.6	0.52	0.61	0.77	0.98	0.76	1.01	0.37	0.52	0.26	0.65	0.19	0.17	0	0.19	0.22	0.27	0.32	0.4	0.21	0.55	0.6	1.61	0.42	0.96	0.93
ENSMMUG00000005165	0.07	0.08	0.05	0.04	0.03	0.04	0.01	0.01	0.01	0.1	0.05	0.02	0.08	0.08	0	0.03	0.14	0	0	0	0.07	0.08	0	0	0.05	0.07	0.05	0.05	0.06	0	0.02	0	0.03	0	0.04	0	0.02	0.03	0	0.01	0.03	0.09	0.1	0	0.02	0.03	0.09	0.11	0.09
ENSMMUG00000005170	0.06	0.02	0.1	0.05	0.01	0.03	0.02	0.05	0.08	0.12	0.27	0.16	0.21	0.19	0.41	0.29	0.05	0.09	0.22	0.29	0.15	0.08	0.33	0.04	0.04	0.03	0.15	0.03	0.13	0.11	0.04	0.05	0.04	0.03	0.03	0.09	0.02	0.07	0.05	0.07	0.05	0.26	0.4	0.36	0.21	0.29	0.51	0.55	0.08
ENSMMUG00000005174	1.69	1.54	2.33	2.17	3.25	2.32	1.68	1.91	2.73	2.53	2.97	2.76	5.11	2.44	2.59	2.41	2.04	1.71	1.89	2.09	3.47	1.7	2.07	1.93	1.92	1.96	1.8	1.71	2.22	1.45	1.73	1.51	2.03	1.79	1.82	2.25	1.92	1.75	1.73	1.38	16.18	20.63	14.05	14.98	12.63	14.14	11.37	12.29	9.63
ENSMMUG00000005176	0.57	0.66	0.87	0.31	0.45	0.66	0.4	0.51	1.59	2.02	2.14	1.41	1.4	1.92	1.62	1.47	1.2	0.69	1.2	1.37	1.33	0.55	0.82	0.79	1.24	1.23	0.48	0.33	0.1	0.44	0.5	0.26	1.95	1.77	2.51	1.08	2.73	3	1.77	1.08	5.19	6.14	3.42	5.79	4.45	4.19	4.14	5.23	6.2
ENSMMUG00000005181	5.5	4.65	4.75	3.72	3.53	4.21	1.96	3.86	5.01	4.92	5.04	4.99	4.42	3.53	3.2	4.32	3.18	2.77	2.87	4.51	2.42	3.49	1.8	3.24	2.97	3.05	3.17	3.62	3.43	2.81	3.06	3.84	62.93	79.86	52.35	61.28	36.57	37.3	39.27	35.88	35.53	65.34	29.3	30.94	26.49	31.9	27.31	27.57	34.94
ENSMMUG00000005183	0.01	0.03	0.04	0.03	0.03	0.02	0.01	0.02	0.07	0.03	0.11	0.08	0.13	0.1	0.08	0.06	0.06	0.09	0.04	0.06	0.04	0.07	0.05	0.12	0.05	0.04	0.01	0.03	0.05	0.04	0.03	0.08	0.04	0.07	0.09	0.1	0.06	0.1	0.14	0.2	0.26	0.35	0.26	0.35	0.36	0.27	0.4	0.22	0.24
ENSMMUG00000005185	16.4	13.13	88.14	11.56	5.89	7.37	5.65	6.66	271.06	317.07	286.76	253.88	226.39	208.33	198.39	191.97	195.4	204.02	235.55	272.75	191.4	156	183.09	184.76	136.16	134.02	59.32	32.67	17.95	34.96	29.54	23.84	1.67	1.31	1.18	1.94	0.76	1.39	0.88	0.8	319.93	404.38	230.88	233.55	141.48	168.1	142.41	154.43	281.92
ENSMMUG00000005190	1.23	1.1	1.38	1.25	2.37	3.15	1.78	2.03	1.68	0.65	1.15	1.21	1.33	1.96	1.39	1.43	1.11	1.13	2.99	1.36	1.24	2.59	0.87	1.38	1.42	1.82	1.9	1.35	1.06	2.18	1.4	1	10.29	13.85	13.91	12.47	10.52	16.95	12.84	9.62	1.56	2.03	3.33	2.26	2.68	2.84	2.31	2.42	1.4
ENSMMUG00000005191	0.2	0.08	0.15	0.09	0.11	0.05	0.01	0.18	0.15	0.08	0.12	0.1	0.05	0.05	0.11	0.08	0.07	0.03	0.12	0.06	0.18	0.21	0.03	0.03	0.05	0.01	0.21	0.39	0.04	0.17	0.03	0.25	0.06	0.02	0.12	0.06	0.03	0.23	0.08	0.21	0	0	0.07	0.12	0.02	0.07	0.1	0.11	0.12
ENSMMUG00000005196	0.92	0.74	1.06	0.82	0.66	0.57	1.06	0.51	2.97	3.3	3.33	1.72	2.22	2.75	2.48	1.8	5.1	3.92	4.3	3.65	3.19	2.67	3.15	2.36	1.54	1.7	1.91	0.88	1.24	0.94	1.13	1.24	0.66	0.68	0.81	0.38	0.67	0.6	0.98	0.96	2.3	2.07	1.98	1.65	1.55	2.52	2.15	1.78	4.84
ENSMMUG00000005198	0.01	0.02	0.04	0.05	0.04	0.03	0.02	0.02	0.03	0.02	0.01	0.1	0.04	0.01	0.01	0.01	0.02	0	0.02	0.06	0.02	0.02	0.01	0.03	0.01	0.03	0.02	0.03	0.04	0.01	0.01	0.04	0.02	0.05	0.04	0.04	0.03	0.01	0.02	0.04	0.04	0.02	0.03	0.02	0.03	0.01	0.01	0.08	0.05
ENSMMUG00000005205	0.06	0.02	0.05	0.04	0.07	0.06	0.11	0.05	0.03	0	0.1	0.06	0.07	0.08	0.05	0.14	0.03	0.01	0.02	0.06	0.1	0.11	0	0.16	0.04	0.09	0.04	0.08	0.16	0.09	0.02	0.07	0.08	0.04	0.03	0.07	0.04	0.07	0.07	0.18	0.07	0.12	0.02	0.04	0.06	0.18	0.06	0.06	0
ENSMMUG00000005207	5.14	5.05	5.31	7.65	15.16	16.23	10.1	10.93	4.11	2.15	1.48	2.71	2.64	2.66	2.03	2.4	3.01	3.25	3.56	2.09	2.2	2.93	1.33	2.67	2.94	3.62	2.67	3.49	2.97	3.4	5.82	2.83	8.58	11.87	13.97	7.85	12.34	10.67	9.36	8.85	8.11	15.64	11.08	11.36	10.33	12.17	10.03	10.75	5.47
ENSMMUG00000005209	22.69	20.67	36.8	22.7	18.53	25.54	24.14	24.17	15.63	13.64	18.81	16.42	11.47	17.36	19.17	16.4	13.35	13.29	31.3	16.93	12.76	16.77	15.3	16.12	16.26	17.73	36.37	18.67	13.58	20.49	20.6	17.72	14.09	13.98	54.2	15.24	12.57	14.94	16.46	18.25	14.57	18.75	37.29	19.04	17.06	22.11	22.9	23.55	18.66
ENSMMUG00000005216	0.43	0.23	0.58	0.24	0.26	0.13	0.17	0.19	9.3	13.1	8.31	6.91	7.66	5.92	3.51	6.49	7.25	6.57	5.8	7.52	5.37	3.24	2.49	5.48	2.81	2.8	0.78	0.46	0.92	0.95	0.19	0.38	0.03	0.02	0.04	0.02	0.02	0	0.04	0.03	3.49	3.61	1.21	1.29	2.09	0.99	0.7	1.66	10.8
ENSMMUG00000005220	18.54	20.35	24.9	26.68	23.39	25.63	23.22	35.54	23.42	26.19	32.93	34.06	29.9	34.17	31.61	45.59	22.1	20.46	27.79	27.77	25.71	30.39	28.18	38.54	21.17	24.65	34.32	27.69	26.24	37.98	26.75	40.7	6.42	5.82	14.27	10.88	11.66	13.36	10.85	19.4	20.52	19.01	25.99	26.13	22.4	29.47	24.56	38.29	22.39
ENSMMUG00000005222	12.85	13.14	13.12	15.16	8.81	10.5	8.62	10.82	4.22	6.46	7.46	9.4	5.36	6.02	7.2	6.86	5.41	6.92	7.48	10.53	4.17	4.9	6.23	3.84	4.43	3.92	9.03	15.68	21.96	13.5	16.93	16.08	18.93	27.26	25.86	32.52	19.25	24.38	31.55	25.51	2.78	2.5	2.36	2.84	1.82	1.77	1.91	1.86	6.45
ENSMMUG00000005231	0.03	0	0	0.01	0.02	0	0.01	0.01	0.08	0.07	0.04	0.02	0.06	0.21	0.07	0.17	0.01	0.18	0.05	0.03	0.03	0.01	0.02	0.08	0.03	0	0.04	0.02	0.06	0	0	0.02	0	0.03	0.05	0	0	0.11	0.04	0	0.04	0.06	0.04	0.03	0.05	0.09	0	0	0.04
ENSMMUG00000005238	0.17	0.18	0.25	0.16	0.16	0.17	0.15	0.28	0.47	0.66	0.37	0.32	0.62	0.72	0.77	0.62	0.42	0.27	0.94	0.22	0.59	0.64	0.47	0.85	0.45	0.31	0.53	0.13	0.17	0.18	0.1	0.27	0	0.24	0.35	0.21	0.38	0.1	0.23	0.17	0.52	0.7	1.32	1.47	0.6	1.15	1.28	1.04	0.68
ENSMMUG00000005253	0	0	0.15	0.07	0.08	0.24	0.35	0.28	0	0.38	0	0.07	0.13	0.25	0.06	0	0.12	0.08	0.08	0.25	0	0	0.15	0.26	0.2	0	0.07	0.2	0.06	0.22	0.32	0.24	0.18	0	0.34	0.22	0	0.24	0.13	0.06	0	0.09	0.04	0.23	0	0.25	0.09	0.14	0
ENSMMUG00000005259	0.46	0.31	0.15	0.09	0.14	0.06	0.12	0.02	0.04	0.05	0.02	0.07	0	0.1	0.14	0.03	0.05	0.02	0.04	0.07	0.1	0.06	0	0	0.35	0.29	0.76	0.64	0.97	1.52	0.4	0.37	0.07	0.06	0.02	0.08	0.17	0.06	0.16	0.14	0	0.09	0	0.02	0.02	0.02	0.06	0	0.03
ENSMMUG00000005266	0.02	0.01	0.01	0.02	0.02	0.02	0.02	0.02	0.01	0.02	0.02	0.02	0.01	0.03	0.01	0.02	0.02	0.03	0.04	0.02	0.02	0.03	0	0.01	0.05	0.05	0.01	0.01	0.02	0.02	0.03	0.01	0.06	0.05	0.07	0.03	0.02	0.05	0.03	0.02	0.02	0.02	0.04	0.01	0.02	0.01	0.02	0.02	0.02
ENSMMUG00000005267	0.06	0.11	0.11	0.14	0.11	0.21	0.09	0.09	0.15	0.04	0.11	0.1	0.14	0.06	0.29	0.04	0	0	0.03	0.44	0.03	0.06	0.14	0	0.08	0.08	0.15	0.51	0	0.11	0	0.12	39.88	28.99	24.11	27	27.13	29.56	25.85	26.63	60.87	40.12	31.02	36.21	26.56	18.49	34.93	28.93	84.1
ENSMMUG00000005270	2.88	2.99	1.71	2.25	2.84	3.32	3.45	3.1	1.32	1.31	0.54	0.7	0.44	0.62	0.55	0.56	0.93	0.77	0.5	0.51	0.35	0.52	0.19	0.34	1.33	1.51	1.94	1.98	2.26	2.01	3.68	2.56	0.27	0.31	0.35	0.3	0.21	0.16	0.39	0.45	2.5	2.94	1.67	2.03	0.84	1.49	1.6	1.41	2.79
ENSMMUG00000005286	0.19	0.11	0.19	0.08	0.05	0.06	0.04	0.17	0.06	0.16	0.07	0.13	0.09	0.1	0.15	0.04	0.03	0.12	0.05	0.17	0	0.07	0.12	0.28	0.08	0.12	0.11	0.2	0.1	0.25	0.11	0	0.08	0.21	0.3	0.42	0.38	0.28	0.19	0.26	0.16	0.14	0.23	0.11	0.09	0.21	0.11	0.15	0.11
ENSMMUG00000005290	0.02	0.02	0.01	0.01	0	0.03	0.02	0.02	0.02	0	0.01	0.02	0.01	0.03	0.03	0	0.01	0.01	0	0.01	0.01	0.02	0.02	0.01	0.03	0	0.04	0.01	0	0	0.01	0.01	0.04	0.02	0.02	0.03	0.01	0.01	0.02	0.02	0.02	0.03	0.01	0.03	0.02	0.01	0.01	0.02	0.01
ENSMMUG00000005295	0.27	0.33	0.41	0.42	0.49	0.34	0.15	0.19	0.3	0.3	0.25	0.19	0.18	0.2	0.16	0.15	0.42	0.31	0.21	0.21	0.22	0.14	0.19	0.17	0.23	0.3	0.3	0.18	0.21	0.31	0.2	0.11	0.1	0.08	0.04	0.09	0.1	0.05	0.08	0.04	0.09	0.22	0.13	0.11	0.17	0.16	0.04	0.02	0.47
ENSMMUG00000005296	39.66	26.87	52.62	40.78	16.51	20.94	25.6	27.92	19.52	37.2	45.29	33.32	19.27	27.96	30.55	31.84	40.43	28.19	38.48	36.68	21.69	28.11	29.42	26.61	35.58	26.74	58.06	38.5	30.83	60.88	35.07	66.83	10.66	6.55	10.84	12.69	10.02	10.09	9.31	10.64	23.39	15.03	27.42	21.04	13.37	17.28	24.91	14.82	34.63
ENSMMUG00000005317	0.75	0.78	0.79	0.47	0.46	0.41	0.48	0.52	0.75	0.84	0.43	0.5	0.32	0.18	0.2	0.24	0.66	0.8	0.46	0.31	0.17	0.13	0.13	0.26	0.89	0.95	1	0.66	0.54	0.56	0.38	0.75	0.7	0.82	0.78	0.5	0.42	0.37	0.51	0.3	1.59	2.2	1.33	0.8	0.7	0.48	0.81	0.7	2.22
ENSMMUG00000005318	0.01	0.02	0.02	0.02	0.02	0.02	0.02	0.02	0.02	0.01	0.02	0.01	0.03	0.07	0.03	0.01	0.01	0.02	0.03	0	0.01	0.04	0	0.03	0.02	0.02	0.01	0.01	0.01	0.01	0.02	0	0.02	0.04	0.07	0	0.01	0.01	0.02	0.02	0	0.02	0.05	0.03	0.01	0	0.04	0.01	0.04
ENSMMUG00000005319	0.46	0.29	0.3	0.32	0.29	0.36	0.42	0.32	0.24	0.11	0.48	0.31	0.24	0.5	0.34	0.21	0.14	0.14	0.28	0.23	0.2	0.48	0.32	0.16	0.32	0.26	0.17	0.31	0.23	0.24	0.45	0.22	4.02	2.41	1.81	1.77	2.02	1.98	1.54	1.9	0.61	0.25	0.25	0.21	0.37	0.55	0.34	0.27	0.64
ENSMMUG00000005320	0.11	0	0.05	0.08	0.05	0	0	0.11	0.03	0	0.05	0.05	0	0.12	0.04	0.08	0.03	0.03	0.27	0.2	0	0	0.05	0	0.07	0	0.04	0	0	0	0	0	0.22	0.13	0.32	0.33	0.13	0.4	0.16	0.44	0	0.08	0.03	0	0	0	0	0.07	0.01
ENSMMUG00000005328	0.02	0.13	0.22	0.17	0.04	0.09	0	0.08	0.04	0	0.04	0	0.04	0	0.02	0.18	0	0.02	0.09	0	0	0	0	0.03	0.01	0.02	0.25	0.02	0.04	0.04	0.1	0.05	0.08	0.26	0.93	0.05	0.08	0.05	0.19	0.29	0.24	0.33	1.02	0.1	0.05	0.16	0.13	1.4	0.17
ENSMMUG00000005335	0.8	0.67	0.41	0.69	0.71	0.52	0.55	0.6	1.04	0.97	0.46	0.61	0.46	0.55	0.71	0.68	0.89	0.51	0.89	0.89	0.5	0.34	0.51	0.78	0.78	0.58	0.29	0.5	0.27	0.5	0.64	0.99	2.41	3.07	0.8	1.86	1	0.76	1.23	1.21	0.77	1.07	0.64	0.86	0.51	0.43	0.47	0.42	0.98
ENSMMUG00000005343	0.02	0	0.06	0	0.04	0.02	0	0.02	0.03	0.06	0.04	0.07	0.03	0.04	0.17	0.12	0	0.02	0.06	0.04	0	0.02	0	0.04	0.03	0	0.07	0.04	0.06	0	0	0	0.04	0.05	0.18	0.06	0.07	0.06	0.07	0.19	0	0	0.18	0	0.04	0	0.1	0.05	0.03
ENSMMUG00000005351	0.18	0.3	0.08	0.04	0.04	0.15	0	0.04	0.11	0.06	0	0.11	0.1	0.19	0.21	0.07	0	0	0.04	0	0.07	0.02	0	0	0	0.03	0.04	0	0.2	0.08	0	0.09	0.09	0	0	0.03	0.15	0	0	0.04	0.05	0.04	0	0.18	0	0	0.02	0.12	0.15
ENSMMUG00000005353	0.11	0.09	0.1	0.17	0.07	0.1	0.13	0.15	0.35	0.4	0.29	0.54	0.23	0.33	0.37	0.43	0.19	0.15	0.29	0.35	0.3	0.21	0.64	0.21	0.21	0.1	0.1	0.24	0.03	0.05	0.38	0.38	4.2	3.88	2.07	2.27	3.8	4.29	2.54	2.69	0.67	1.15	0.49	0.55	0.45	0.85	0.98	0.72	2.03
ENSMMUG00000005354	0	0	0	0	0	0	0	0	0	0	0	0	0	0	0	0	0	0	0	0	0	0	0	0	0	0	0	0	0	0	0	0	0.01	0.04	0.03	0	0.06	0.01	0	0.04	0	0.03	0.05	0.02	0	0	0.04	0.06	0
ENSMMUG00000005360	0.38	0.1	0.19	0.15	0.12	0.08	0.13	0.43	0.12	0.06	0.17	0.18	0.17	0.1	0.2	0.26	0.25	0.03	0.05	0.3	0.41	0.16	0.04	0.33	0.15	0.2	0.31	0.06	0.14	0.26	0.26	0.16	2.12	1.11	0.86	1.89	0.84	1.21	1.25	1.22	0.53	0.34	0.32	1.18	1.01	0.54	0.7	0.6	0.39
ENSMMUG00000005361	0	0	0	0	0	0	0	0	0	0	0	0	0	0	0	0	0	0	0	0	0	0	0	0	0	0	0	0	0	0	0	0	0.12	0.29	0.1	0.09	0.06	0.13	0.13	0.05	1.19	2.3	0.98	0.51	0.43	0.52	0.55	0.27	1.52
ENSMMUG00000005367	0.04	0.14	0.03	0.05	0.01	0.01	0.04	0.09	0.03	0.03	0.03	0	0.08	0.05	0.12	0.15	0.11	0.05	0.07	0.09	0.08	0.01	0.02	0.1	0.05	0.02	0.04	0.09	0.09	0.07	0.01	0.09	0.05	0.03	0	0.06	0.11	0.13	0.13	0.16	0.09	0.05	0.04	0.01	0.11	0.01	0.11	0.11	0.09
ENSMMUG00000005370	0.39	0.26	0.49	0.17	0.32	0.27	0.75	0.53	0.12	0.05	0.2	0.18	0.2	0.37	0.23	0.21	0.22	0.12	0.53	0.16	0.31	0.37	0.36	0.58	0.73	0.54	1.4	0.84	0.75	1.35	0.72	1.41	10.17	13.43	3.83	10.16	2.35	1.5	1.65	1.09	6.3	11.42	10.32	8.07	7.2	7.67	7.29	7.25	0.91
ENSMMUG00000005374	0.02	0.07	0.12	0.09	0.04	0.04	0.02	0.02	0.08	0.04	0.13	0.26	0.02	0.06	0.02	0.03	0.05	0.08	0.28	0.17	0.03	0.15	0.01	0.04	0.04	0.06	0.14	0.16	0.02	0.06	0.01	0.01	4.67	3.86	3.47	6.11	4.7	6.12	4.57	5.33	1.44	1	1.8	2.12	2.24	1.69	1.59	1.81	1.01
ENSMMUG00000005387	0.04	0.02	0.04	0.03	0.02	0.01	0.03	0.01	0.02	0.03	0.03	0.04	0.03	0.03	0.04	0.01	0.06	0.01	0.02	0.03	0.02	0.02	0.02	0.02	0.07	0.03	0.02	0.04	0.02	0.02	0.07	0.01	0.11	0.06	0.08	0.07	0.05	0.04	0.08	0.07	0.01	0.05	0.04	0.05	0.02	0.03	0.05	0.02	0.06
ENSMMUG00000005390	0	0.01	0.03	0.01	0.04	0	0	0.03	0.02	0	0.04	0	0.02	0.03	0.01	0	0	0.05	0	0.01	0.03	0.02	0	0.06	0.01	0.02	0.01	0	0.1	0.07	0	0	0.01	0.04	0.03	0.02	0	0.01	0.04	0.01	0.06	0.04	0.02	0.01	0.03	0	0.07	0.09	0.03
ENSMMUG00000005392	0.11	0.15	0.3	0.19	0.06	0.23	0.1	0.31	0.08	0.06	0.19	0.1	0.19	0.13	0.17	0.2	0.13	0.16	0.12	0.3	0.07	0.23	0.31	0.3	0.1	0.02	0.43	0.18	0.1	0.36	0.35	0.19	0.12	0.06	0.22	0.05	0.09	0.03	0.04	0.16	0.07	0.14	0.8	0.25	0.14	0.26	0.08	0.07	0.14
ENSMMUG00000005403	0.13	0.08	0.02	0.23	0.1	0.14	0.1	0	0.16	0.31	0.07	0.11	0.03	0.13	0.03	0.16	0.02	0.04	0.1	0.02	0.07	0.17	0.2	0.04	0.13	0.03	0	0.14	0.09	0.11	0.08	0.16	0.53	0.56	0.48	0.39	0.33	0.7	0.14	0.2	0.12	0.53	0.53	0.23	0.36	0.32	0.51	0.61	0.34
ENSMMUG00000005404	0.14	0.16	0.07	0.15	0.19	0.24	0.16	0.18	0.17	0.09	0.08	0.06	0.16	0.14	0.23	0.13	0.17	0.1	0.1	0.07	0.1	0.18	0.05	0.11	0.1	0.08	0.04	0.06	0.11	0.18	0.13	0.19	0.32	0.24	0.26	0.36	0.31	0.31	0.38	0.25	0.15	0.28	0.12	0.28	0.29	0.22	0.38	0.19	0.37
ENSMMUG00000005417	0.05	0	0	0	0.01	0	0	0.05	0.01	0	0.02	0	0.02	0	0.04	0.07	0	0.02	0.01	0	0.01	0	0	0.01	0.02	0.03	0.01	0	0	0.01	0	0	0.06	0.03	0.02	0.07	0	0.02	0	0.02	0.04	0	0.01	0.12	0.03	0.01	0	0.03	0.01
ENSMMUG00000005424	0.01	0.03	0.01	0.03	0.03	0.03	0.01	0.01	0.03	0.04	0.01	0.08	0.02	0.01	0.02	0	0.02	0	0	0.06	0.05	0.01	0	0	0	0	0.01	0	0	0.02	0	0.02	0.03	0.02	0.03	0.02	0.03	0.01	0.01	0.01	0.04	0.03	0.01	0	0.05	0.03	0.01	0.02	0.02
ENSMMUG00000005425	0	0	0	0	0	0	0	0	0	0	0	0	0	0	0	0	0	0	0	0	0	0	0	0	0	0	0	0	0	0	0	0	22.68	21.81	21.81	22.8	21.91	23.37	24.71	23.6	0.58	0.2	1.49	1.33	0.4	0.76	1.53	1.22	0.38
ENSMMUG00000005429	0.09	0.02	0.02	0.02	0.09	0.05	0.09	0.02	0.09	0	0.16	0	0.04	0	0	0	0	0	0.02	0	0	0	0.06	0.2	0.03	0	0	0.04	0.14	0.08	0	0	0	0.08	0.03	0.14	0.08	0.03	0	0.04	0	0.14	0.02	0.06	0.05	0	0	0	0.03
ENSMMUG00000005430	31.83	25.32	12.19	16.48	7.46	8.03	11.95	19.3	11.4	12.14	15	13.23	14.85	12.47	13.91	14.7	12.31	12.09	15.68	15.16	15.88	13.45	13.95	12.18	7	8.05	7.28	10.7	9.68	12.41	12.31	8.92	5.39	5.94	7.21	7.15	7.42	6.95	7.1	8.33	8.61	8.16	8.67	6.44	10.09	7.67	7.05	8.93	18.03
ENSMMUG00000005432	0.18	0.16	0.16	0.14	0.42	0.14	0.12	0.12	0.1	0.13	0.14	0.13	0.31	0.16	0.18	0.15	0.18	0.11	0.1	0.14	0.19	0.14	0.12	0.13	0.13	0.14	0.11	0.09	0.25	0.14	0.16	0.12	2.14	2.05	1.14	1.21	1	1.43	1.3	0.82	0.82	0.73	0.64	0.63	0.77	0.65	0.97	0.56	0.97
ENSMMUG00000005439	0.22	0.04	0.09	0.07	0.16	0.16	0.2	0.1	0	0.06	0.04	0	0.07	0.05	0	0	0.16	0.02	0.09	0.02	0	0	0	0.03	0.06	0	0.04	0	0	0	0	0.09	0	0.06	0.06	0.1	0	0.18	0.01	0.25	0.42	0.28	0.07	0.15	0.08	0.33	0	0.04	0.03
ENSMMUG00000005443	0	0.04	0.04	0	0.01	0	0.05	0	0.02	0	0	0	0	0	0.02	0.06	0	0.07	0.03	0	0.02	0	0	0	0	0	0	0	0	0.08	0	0	0	0.03	0	0.02	0	0	0	0	0.07	0.05	0	0	0	0	0.02	0	0
ENSMMUG00000005450	0.55	0.19	0.63	1.63	1.16	1.74	1.74	1.39	0.19	0.08	0.48	0.31	0.57	0.45	0.33	0.18	0.29	0.03	0.06	0.11	0.07	0.25	0.22	0.29	0.11	0.15	0.34	0.31	0.72	0.43	0.61	0.77	0.05	0.23	0.17	0.51	0.17	0.35	0.47	0.75	0.14	0.43	0.99	0.23	0.19	0.25	0.3	0.18	0.34
ENSMMUG00000005451	32.74	33.26	37.16	32.26	32.11	33.07	44.75	61.03	27.12	24.7	79.64	42.82	55.75	91.65	64.28	60.8	36.62	25.53	136.37	66.48	95.11	115.78	247.56	146.94	23.58	19.42	38.3	37.42	52.11	43.69	58.28	55.99	53.53	54.84	104.33	69.66	91.97	89.53	87.8	88.54	50.03	37.22	93.23	86.54	69.94	136.43	118.17	128.78	24.31
ENSMMUG00000005457	0.63	0.16	0.5	0.25	0.23	0.73	0.13	0.16	0.51	1.43	0.85	0.35	2.66	1.02	0.4	1.08	0.39	1.07	0.54	0.3	1.4	0.88	0.22	0.75	0.91	0.89	4.9	3.69	2.45	2.69	1.77	1.39	2	0.88	1.22	1.5	0.39	0.94	0.64	0.72	0.29	0.38	0.33	0.45	0.09	0.5	0.2	0.36	0.41
ENSMMUG00000005462	0	0	0	0	0	0	0	0	0	0	0	0	0	0	0	0	0	0	0	0	0	0	0	0	0	0	0	0	0	0	0	0	0.52	0.25	0.62	0.24	0.23	0.2	0.12	0.16	0.19	0.16	0.48	0.04	0.03	0.03	0.16	0.04	0.04
ENSMMUG00000005466	0.09	0.14	0.3	0.22	0.34	0.36	0.24	0.37	0.11	0.12	0.33	0.35	0.43	0.37	0.28	0.52	0.18	0.1	0.55	0.36	0.48	0.33	0.49	0.45	0.09	0.11	0.14	0.15	0.17	0.24	0.17	0.25	0.04	0.04	0.06	0.03	0.04	0.05	0.05	0.07	0.11	0.17	0.27	0.22	0.34	0.15	0.13	0.2	0.12
ENSMMUG00000005470	16.81	15.49	14.18	18.47	32.18	29.3	22.59	26.62	26.69	13.62	11.19	18.79	18.1	19.07	17.23	20.05	15.93	16.06	22.16	16.13	14.06	19.85	11.1	17.79	16.94	20.05	12.31	16.18	10.46	18.77	20.18	13.07	721.49	669.95	762.8	647.52	580.56	537.8	486.97	617.82	1007.73	1112.06	909.47	836.59	621.08	731.73	643.68	675.13	1124.93
ENSMMUG00000005472	0	0	0	0	0	0	0	0	0	0	0	0	0	0	0	0	0	0	0	0	0	0	0	0	0	0	0	0	0	0	0	0	1.31	0.66	1.12	1.63	0.25	0.52	0.38	0.12	0.03	0.12	0.09	0.37	0.04	0.37	0	0.14	0.02
ENSMMUG00000005473	0.01	0.02	0.03	0.01	0.02	0.01	0.01	0	0.03	0	0.01	0.04	0.01	0	0.02	0	0.02	0.01	0.01	0.01	0.01	0.03	0.03	0.01	0.01	0	0	0.01	0.01	0	0.03	0	0.03	0.03	0.01	0	0	0.01	0.01	0.04	0	0	0	0	0	0.05	0	0	0
ENSMMUG00000005476	0.75	0.23	0.01	0.04	0.1	0.07	0.04	1.31	0.05	0.59	0.03	0.01	0.06	0.01	0.03	0.33	0.19	0.09	0.02	0	0.2	0.23	0	0.1	0.08	0.09	0.02	0	0.06	0.11	0.05	0.13	0.27	0.05	0.1	0.01	0.07	0.07	0.08	0.17	0.01	0	0.01	0.04	0.02	0.03	0.04	0.1	0.06
ENSMMUG00000005480	0.74	0.93	1.89	0.97	0.85	1.02	1.95	1.58	0.2	0.09	0.65	0.32	0.58	1.03	0.66	0.66	0.31	0.41	1.38	0.62	1.11	1.29	1.61	1.35	2.48	2.7	5.7	3.81	3.81	7.96	3.84	5	0.69	0.8	0.96	1.14	1.63	1.57	1.42	1.52	0.49	0.67	1.33	2.05	1.24	1.24	2.27	2.16	0.23
ENSMMUG00000005481	0.19	0.23	0.25	0.06	0.37	0.39	0.2	0.42	0.6	0.16	0.24	0.04	0.58	0.34	0.26	0.21	0.47	0.31	0.23	0.19	0.05	0.22	0.04	0.47	0.67	0.27	0.3	0.39	0.14	0.63	0.42	0.32	0.62	1.29	0.38	0.8	0.76	0.61	0.37	0.93	0.56	0.47	0.33	0.18	0.84	0.77	0.91	0.41	0.26
ENSMMUG00000005491	0.86	0.61	0.8	0.86	0.67	0.56	0.78	0.7	0.33	0.34	0.64	0.43	0.53	0.5	0.55	1.01	0.54	0.48	0.62	0.68	0.64	0.9	0.76	0.63	0.44	0.76	1.02	1.34	0.85	1.66	1.21	1.06	0.73	0.41	0.51	0.65	0.73	0.69	0.92	1.04	0.42	0.5	0.43	0.7	0.67	0.37	1.54	1.01	0.41
ENSMMUG00000005512	0.02	0	0.03	0.04	0.02	0.02	0.03	0.03	0	0.03	0.02	0.03	0.02	0.02	0.01	0.05	0.03	0.03	0.01	0.02	0.04	0.02	0.01	0.03	0.01	0	0.06	0.09	0.04	0.08	0.01	0.01	0.22	0.11	0.09	0.13	0.04	0.03	0.02	0.03	0	0.01	0.04	0	0.04	0.02	0	0.03	0.02
ENSMMUG00000005517	1.16	0.6	0.71	0.84	0.56	0.97	0.9	0.64	0.72	1.19	0.92	0.82	0.43	0.59	0.81	0.92	1.04	1.01	0.71	0.6	0.46	0.57	0.29	0.42	1.39	0.78	0.66	0.61	0.53	0.69	1.05	0.78	0.43	0.21	0.23	0.24	0.29	0.12	0.28	0.27	1.8	1.42	1.66	1.14	0.89	1.47	1.63	1.34	2.25
ENSMMUG00000005518	0.05	0.03	0.02	0.06	0.03	0.04	0.07	0.09	0.01	0.02	0.01	0.01	0	0	0.04	0.03	0	0.01	0.03	0.03	0.01	0.01	0.05	0.2	0	0	0.02	0.07	0.07	0.11	0.16	0.37	0.15	0.17	0.12	0.16	0.04	0.14	0.12	0.18	0.04	0	0.02	0.01	0.02	0.06	0.03	0.38	0.01
ENSMMUG00000005519	0.01	0	0.01	0.02	0.01	0.01	0.01	0.02	0	0	0	0	0.02	0.02	0.01	0.01	0	0	0	0.01	0	0	0.01	0	0.01	0.01	0	0.01	0.03	0.02	0.02	0	0.02	0.02	0.04	0.01	0.04	0.01	0.01	0.02	0.01	0	0.01	0	0.02	0	0.01	0.09	0.01
ENSMMUG00000005529	2.34	2.46	1.61	1.22	0.61	0.49	0.84	0.23	0.1	0.06	0.45	0.09	0.36	0.15	0.33	0.24	0.01	0.16	0.78	0.1	0.35	0.29	0.29	0.09	0.97	5.38	4.63	1.25	1.39	1.54	0.79	0.62	0.13	0.26	1.04	0.35	0.42	0.3	0.48	0.81	0.08	0.16	0.74	0.07	0.21	0.64	0.19	0.22	0.03
ENSMMUG00000005531	0.32	0.27	0.63	0.08	0.41	0.36	0.36	0.47	0.21	0.31	0.32	0.24	0.33	0.47	0.33	0.36	0.19	0.22	0.5	0.09	0.68	0.54	0.78	0.43	0.68	0.64	1.03	0.34	0.57	1.26	0.62	0.51	0.54	0.48	0.75	0.39	0.8	0.65	0.6	0.53	0.56	0.36	0.9	0.42	1.16	0.88	1.02	0.69	0.64
ENSMMUG00000005532	0.23	0.17	0.13	0.29	0.24	0.27	0.23	0.17	0.05	0.04	0.01	0.11	0.01	0.04	0.06	0.1	0.04	0.01	0.02	0.12	0.02	0.1	0.02	0.04	0.12	0.09	0.34	0.14	0.38	0.3	0.34	0.39	0.09	0.13	0.11	0.08	0.05	0.12	0.17	0.19	0.06	0.04	0.12	0.19	0.06	0.08	0.14	0.15	0.06
ENSMMUG00000005534	0.48	0.64	0.82	0.68	0.42	0.54	1.02	0.91	0.45	0.62	1.04	0.96	0.91	1.04	1.28	1.44	0.68	0.43	1.12	1.31	0.74	1.24	0.87	0.64	0.52	0.28	1.21	0.84	0.96	0.86	0.93	1.17	0.84	0.35	0.82	0.77	0.65	1	1.15	0.94	0.51	0.63	0.69	0.59	0.9	0.72	0.68	1.06	0.34
ENSMMUG00000005537	0.01	0.03	0.02	0.03	0.03	0.01	0.05	0.01	0.02	0.04	0.01	0	0.11	0	0	0	0.01	0	0.02	0	0.03	0.04	0	0.01	0	0.04	0.05	0.04	0.02	0.03	0	0	0.05	0.05	0.07	0.11	0.04	0.01	0	0.04	0.07	0.07	0.07	0.1	0.01	0.01	0.01	0.01	0
ENSMMUG00000005541	0.15	0.35	0	0	0.03	0	0	0.04	0	0	0	0	0	0	0	0.05	0	0	0	0	0	0	0	0	0.16	0	0.21	0	0.22	0	0.04	0.07	0	0	0	0	0	0	0	0.03	0	0	0.04	0.05	0	0	0	0	0
ENSMMUG00000005542	0.04	0	0	0	0	0	0	0	0	0.02	0	0	0	0	0	0	0.01	0.05	0	0	0	0	0	0	0	0	0	0	0	0	0	0	0.25	0.09	0.02	0.16	0.02	0	0	0.02	0	0	0.01	0.01	0.01	0.16	0	0.02	0
ENSMMUG00000005545	0.02	0	0.09	0	0.01	0.04	0.02	0.01	0.02	0.04	0.06	0.02	0	0.1	0.04	0.02	0.05	0.02	0.05	0.08	0.01	0.04	0.09	0	0.04	0.04	0.05	0	0.06	0.07	0.03	0	0.12	0.02	0.09	0.06	0.16	0.18	0.03	0.06	0.19	0.04	0.04	0.05	0.05	0.15	0.02	0.1	0.01
ENSMMUG00000005551	0.22	0.3	0.62	0.27	0.19	0.27	0.37	0.32	0.15	0.13	0.31	0.24	0.18	0.21	0.22	0.27	0.18	0.25	0.43	0.38	0.26	0.24	0.27	0.26	0.25	0.35	0.89	0.58	0.34	0.71	0.52	0.57	0.27	0.38	0.56	0.56	0.52	0.38	0.46	0.46	0.33	0.43	0.81	0.74	0.51	0.56	0.73	0.58	0.47
ENSMMUG00000005562	0.12	0.11	0	0.01	0.07	0.02	0	0	0.01	0	0	0	0.04	0.03	0.05	0	0.02	0	0	0.01	0	0.01	0.01	0	0	0	0.02	0	0	0	0	0	0.06	0.06	0	0	0.02	0.09	0	0.07	0.1	0	0.01	0	0.01	0.01	0.01	0.01	0.02
ENSMMUG00000005563	0.05	0.03	0.04	0.04	0.01	0.02	0	0.02	0.01	0.01	0.07	0	0.05	0.09	0.01	0.04	0.05	0.09	0.03	0.01	0.01	0.04	0.02	0.09	0.07	0.07	0.02	0.06	0.04	0	0.03	0.01	0.04	0.04	0.16	0.14	0.04	0.02	0.09	0.1	0.07	0.05	0.12	0.11	0.02	0.02	0.08	0.04	0.03
ENSMMUG00000005564	0.2	0.22	0.41	0.1	0.04	0.19	0.1	0.22	0.03	0.12	0.27	0.29	0.1	0.09	0.12	0.03	0.04	0	0.27	0.02	0.05	0.18	0.22	0.32	0.27	0.14	0.21	0.18	0.26	0.31	0.3	0.59	0.81	0.58	0.77	0.72	0.63	0.39	0.64	0.31	0.4	0.28	0.59	0.38	0.87	0.66	0.42	0.43	1.04
ENSMMUG00000005565	0.04	0	0	0.01	0	0.06	0	0	0.01	0.04	0	0.05	0	0	0	0.06	0	0.05	0.01	0.02	0.02	0	0.01	0	0.01	0.04	0.11	0.03	0.07	0.02	0.04	0	0.28	0.09	0.11	0.21	0.03	0.01	0.08	0.01	0	0	0	0.02	0	0.02	0	0.03	0
ENSMMUG00000005567	0.02	0.02	0.04	0.02	0.04	0.07	0.02	0.04	0.03	0.02	0.05	0	0	0	0.01	0.01	0.04	0.01	0	0.02	0.04	0.03	0.02	0.02	0.04	0.05	0.02	0.01	0.09	0.02	0.04	0.01	0.14	0.13	0.15	0.12	0.03	0.05	0.05	0.05	0.03	0.02	0.01	0.03	0.06	0.01	0.01	0.03	0.05
ENSMMUG00000005568	0.28	0.07	0.57	0.15	0.1	0.28	0.26	0.11	0.16	0.26	0.28	0.05	0.2	0.17	0.09	0.21	0.29	0.11	0.65	0.17	0.45	0.2	0.37	0.76	0.22	0.22	0.15	0.22	0.12	0.31	0.61	0.22	0.47	0.18	1.25	0.7	0.1	0.51	0.27	0.34	0.5	0.14	1.34	0.2	0.59	0.68	0.44	0.58	0.32
ENSMMUG00000005569	0.11	0.02	0.07	0.06	0.04	0.02	0.16	0.07	0	0	0	0.02	0.01	0	0	0	0	0	0.02	0	0	0.04	0.02	0	0.02	0	0.02	0.05	0.07	0	0.01	0.06	0.04	0.05	0.01	0.05	0	0.03	0.06	0.03	0.01	0	0.03	0.01	0	0	0.04	0.01	0.04
ENSMMUG00000005570	0.12	0.21	0.1	0.09	0.04	0.09	0.13	0.13	0.06	0.05	0.05	0.04	0.05	0.02	0.11	0.08	0.05	0.08	0.04	0.03	0.1	0.1	0.1	0.05	0.07	0.05	0.06	0.12	0.09	0.09	0.15	0.05	0.11	0.08	0.12	0.08	0.13	0.1	0.08	0.07	0.11	0.07	0.13	0.08	0.06	0.07	0.09	0.07	0.46
ENSMMUG00000005572	3.57	4.27	6.03	3.58	1.89	2.27	1.91	2.61	2.99	4.13	4.63	2.75	2.47	3.38	2.93	2.64	4.85	5.33	5.09	3.36	2.84	4.39	2.86	3.7	4.98	5	8.36	5.61	5.9	6.31	3.87	7.4	2.06	2.5	2.8	1.62	3.09	2.64	2.7	2.54	2.74	2.09	3.48	2.25	2.3	3.83	2.93	3.06	4.99
ENSMMUG00000005592	0.02	0.01	0.03	0.01	0.07	0.05	0.16	0.13	0.03	0.07	0.15	0.04	0.07	0.12	0.03	0.1	0.08	0.05	0.13	0.06	0.07	0.03	0.15	0.15	0.03	0	0.04	0.05	0	0	0	0.08	0.01	0.05	0.03	0.02	0.03	0	0.02	0	0.12	0.01	0.08	0.03	0.13	0.02	0.06	0.16	0.01
ENSMMUG00000005599	0.58	0.34	0.85	0.64	0.57	0.89	0.63	0.52	0.22	0.16	0.37	0.12	0.53	0.37	0.36	0.14	0.68	0.25	0.48	0.64	0.57	0.39	0.58	0.44	0.62	0.71	1.04	0.87	0.75	1.45	0.92	1.33	0.98	0.88	1.03	2.56	1.25	1.8	2.28	1.9	0.26	0.32	0.55	0.6	0.11	0.35	0.73	0.45	0.29
ENSMMUG00000005600	0.12	0.34	0.27	0.24	0.16	0.09	0.14	0.18	0.31	0.32	0.3	0.18	0.28	0.3	0.22	0.29	0.25	0.38	0.24	0.46	0.23	0.34	0.42	0.07	0.22	0.35	0.35	0.34	0.39	0.49	0.37	0.44	0.24	0.17	0.31	0.29	0.32	0.35	0.28	0.34	0.46	0.23	0.12	0.29	0.43	0.25	0.31	0.28	0.36
ENSMMUG00000005602	0.06	0.02	0.04	0.06	0.04	0.02	0.04	0.05	0.06	0.07	0	0.01	0.02	0.04	0.01	0.03	0.04	0	0.04	0.03	0.01	0.05	0.01	0	0.04	0	0.1	0.06	0.04	0.01	0.06	0.06	0.03	0.03	0.07	0.02	0.05	0.05	0.08	0.06	0.13	0.13	0.06	0.05	0.04	0.1	0.07	0.05	0.04
ENSMMUG00000005603	0.02	0	0.04	0.15	0.04	0.07	0	0	0	0	0	0	0.04	0.19	0.06	0	0	0	0	0	0	0	0	0.63	0	0.12	0.07	0.15	0	0	0	0	0	0.03	0.23	0.03	0	0.07	0.16	0.17	2.12	3.25	2.34	1.87	1.42	1.28	2	1.05	0
ENSMMUG00000005604	0.03	0	0.03	0	0.12	0.06	0.06	0	0.04	0	0	0.17	0.16	0	0.32	0.25	0	0	0.03	0	0.07	0.07	0.03	0.18	0.12	0	0.16	0.06	0.05	0.06	0	0	0.2	0.07	0.54	0.45	0.19	0.51	0.67	0.92	0.14	0.09	0.28	0.12	0.03	0.14	0.15	0.12	0
ENSMMUG00000005605	3.41	2.71	0.18	1.71	0.06	0.02	0.41	1.92	0.02	0.05	0.04	0.03	0.02	0.05	0.04	0.02	0.05	0	0	0	0.05	0.02	0.01	0.1	0.1	0.02	0.11	0.41	0.4	0.25	1.09	0.52	0.02	0	0.02	0	0.03	0	0.01	0	0.02	0.01	0.03	0.02	0	0	0.03	0.04	0.06
ENSMMUG00000005617	1.41	1.27	1.54	0.94	0.84	1.02	0.7	1.13	0.59	0.67	1.83	0.85	1.18	1.57	1.89	1.63	0.56	0.57	1.44	1.18	1.51	1.81	2.97	2.31	0.91	0.51	1.39	1.13	1.46	1.34	1.8	1.98	0.16	0.18	0.22	0.12	0.19	0.14	0.13	0.12	1.01	0.9	2.22	1.64	1.65	1.59	3.06	2.43	0.85
ENSMMUG00000005623	0.09	0.07	0	0.05	0	0.01	0.02	0.07	0	0	0.02	0	0.02	0	0.02	0.03	0	0	0.01	0	0.01	0.02	0	0	0.17	0.1	0.15	0.11	0.07	0.34	0.09	0.2	0.12	0.33	0.04	0.05	0	0.02	0.09	0.08	0.06	0.07	0.13	0	0.02	0.02	0	0.01	0
ENSMMUG00000005628	0	0.15	0.07	0	0.1	0.09	0.16	0.23	0.05	0	0.04	0.02	0.02	0	0.07	0.06	0.06	0.01	0.03	0	0.06	0	0.15	0.31	0.08	0.07	0.24	0.24	0.08	0.29	0.26	0.17	0.24	0.25	0.15	0.06	0.11	0.23	0.26	0.21	0.15	0.03	0	0.08	0.15	0.17	0.22	0.24	0.13
ENSMMUG00000005629	0.42	0.45	0.52	0.31	0.39	0.67	0.26	0.44	0.51	0.41	0.27	0.26	0.47	0.37	0.13	0.44	0.13	0.15	0.22	0.18	0.27	0.16	0.1	0.12	0.17	0.31	0.23	0.33	0.25	0.28	0.28	0.14	0.11	0.07	0.1	0.1	0.02	0	0.02	0.1	0.37	0.55	0.29	0.18	0.1	0.14	0.17	0.33	0.6
ENSMMUG00000005631	10.23	9.21	8.87	5.58	2.74	3.29	4.59	4.45	11.68	14.76	36.59	32.84	24.67	50.53	27.08	31.56	7.95	11.26	17.64	32.91	6.29	11.1	5.37	4.37	7.38	7.36	9.57	8.24	6.93	7.04	10.88	7.92	6.45	10.18	7.78	4.16	7.34	4.86	6.49	25.29	7.24	6.85	14.28	5.48	6.45	25.51	8.43	14.92	8.61
ENSMMUG00000005648	0.05	0.08	0.02	0.01	0.07	0.08	0.05	0.05	0.07	0.03	0.04	0	0.03	0.06	0.02	0.01	0	0.11	0.02	0.01	0.07	0.06	0	0	0.05	0.02	0.01	0	0.05	0	0.07	0.04	0	0.01	0	0.01	0.02	0	0.02	0.01	0.07	0.1	0.18	0.03	0.02	0.05	0.09	0.06	0.06
ENSMMUG00000005661	4.43	5.32	7.76	4.49	2.71	3.22	6.21	4.95	1.67	3.01	5.03	3.15	5.39	6	4.72	4.1	2.72	2.27	4.64	3.59	5.35	6.73	8.3	6.24	10.07	9.39	21.46	14.11	15.69	28.18	13.72	22.95	7.59	8.84	7.85	8	8.08	9.86	9.75	7.25	3.79	2.38	5.52	7.19	6.13	8.44	10.22	8.03	4.34
ENSMMUG00000005668	0.02	0.03	0.06	0.02	0.04	0	0.03	0.02	0.03	0.07	0.07	0.09	0.04	0.07	0.03	0.02	0.05	0	0.02	0.11	0.01	0.02	0.05	0	0.01	0.04	0.02	0.13	0.06	0.01	0.04	0.01	0.11	0.14	0.11	0.17	0.06	0.02	0.13	0.12	0.25	0.16	0.13	0.13	0.09	0.28	0.25	0.25	0.2
ENSMMUG00000005669	0.6	0.61	1.09	0.25	0.14	0.11	0.28	0.3	4.95	4.16	5.48	3.72	4.6	3.87	3.21	3.87	2.93	2.48	3.43	3.38	3.04	2.69	3.55	3.6	2.38	2.51	2.22	0.46	0.61	1.31	0.75	0.72	2.96	2.82	4.01	2.18	2.46	1.71	2.59	2.88	18.78	24.95	17.02	20.36	14.57	13.51	14.36	19.2	18.93
ENSMMUG00000005670	3.21	3.02	4.32	2.63	1.47	1.58	2.03	2.35	3.93	5.1	6.98	7.07	5.7	6.44	6.33	7.9	4.43	4.69	5.6	7.56	6.5	5.32	6.04	6.47	5.6	5.33	4.53	5.07	4.18	5.75	4.3	4.99	16.61	20.87	12.13	12.7	12.47	13.85	8.12	16.11	15.34	15.52	16.49	19.52	15.05	17.38	17.47	17.91	14.3
ENSMMUG00000005676	0.3	0.08	0.23	0.12	0.06	0.08	0.37	0.1	0.04	0.08	0.07	0.13	0.02	0.06	0.14	0.04	0.03	0.06	0.02	0.03	0.02	0.1	0.13	0.02	0.21	0.07	0.18	0.27	0.08	0.1	0.22	0.35	0.11	0.03	0.04	0.07	0.15	0.15	0.19	0.15	0.03	0	0.09	0.1	0.03	0.08	0.1	0.09	0.12
ENSMMUG00000005677	0.07	0.08	0.19	0.05	0.04	0.05	0.03	0.02	0.07	0.15	0.07	0.1	0.03	0.04	0.04	0.09	0	0.03	0.09	0	0.14	0.05	0	0.01	0.13	0.03	0	0	0.15	0.02	0.05	0.02	0.27	0.12	0.02	0.07	0.07	0.13	0.14	0.29	0.26	0.15	0.12	0.03	0.12	0.14	0.12	0.03	0.22
ENSMMUG00000005678	0.05	0	0.02	0.03	0.11	0.05	0.06	0.02	0.06	0	0.03	0	0	0	0.02	0	0.02	0	0	0.09	0	0.02	0	0	0.11	0	0.22	0	0	0.12	0.07	0.16	0	0.09	0	0	0.03	0.05	0	0	0	0.02	0.11	0	0	0	0.02	0	0
ENSMMUG00000005679	0.12	0.16	0.09	0.09	0.21	0.08	0.02	0.18	0.05	0.05	0.04	0	0.06	0.25	0.06	0.12	0.02	0.17	0.14	0.11	0.24	0.1	0.15	0.06	0	0.05	0.23	0	0.42	0.36	0	0	0.28	0.42	0.35	0.28	0.58	0.42	0.48	0.81	0.44	0.25	0.12	0.17	0.21	0.35	0.07	0.31	0.26
ENSMMUG00000005680	0.21	0.02	0	0.01	0.02	0.01	0.02	0.01	0.02	0.05	0.04	0.01	0	0	0	0.01	0.02	0.02	0.01	0.01	0.01	0.01	0	0.01	0.04	0	0.06	0	0.14	0	0	0.04	0.04	0.01	0.01	0.02	0	0	0.02	0.01	0.02	0	0	0.02	0	0.01	0.01	0.01	0.04
ENSMMUG00000005683	0.62	0.3	0.46	0.39	0.56	0.66	0.57	0.51	0.31	0.28	0.27	0.12	0.14	0.26	0.41	0.31	0.35	0.65	0.44	0.23	0.57	0.17	0.28	0.25	0.77	0.66	0.52	0.41	0.24	0.38	0.18	0.33	1.71	1.75	1.8	1.15	0.45	0.74	0.72	0.89	0.67	0.93	0.85	0.27	0.54	0.49	0.47	0.61	0.54
ENSMMUG00000005688	10.43	9.09	15.69	7.05	6.75	7.05	6.91	6.59	18.45	21.88	18.26	12.51	20.58	22.17	14.51	13.35	14.27	13.69	10.88	11.29	13.44	12.89	16.38	10.23	13.81	9.92	14.9	7.65	8.67	14.71	8.69	9.01	9.09	11.23	7.97	10.99	23.7	12.76	16.49	15.6	31.96	28.4	18.66	16.21	18.93	27	14.03	15.45	33.39
ENSMMUG00000005695	1.44	1.16	1.38	0.79	1.68	1.3	1.06	1.42	1.68	1.09	1.47	1.41	1.09	1.29	1.1	0.78	0.52	0.35	1.21	0.9	0.97	0.77	0.86	1.04	0.75	1.07	0.94	0.96	1.18	1.15	1.24	0.94	1.47	1	1.54	1.35	1.21	1.67	1.32	1.78	1.41	1.69	1.73	1.22	1.47	1.51	1.61	1.64	1.16
ENSMMUG00000005698	0.05	0.09	0.07	0.04	0.12	0.12	0	0.12	0.13	0.08	0.12	0.08	0.19	0.1	0.39	0.05	0.03	0.09	0.05	0.06	0.05	0.2	0	0.04	0.03	0.08	0.06	0.02	0.04	0.17	0.05	0.05	3.84	4.07	2.62	4.13	4.54	5.33	3.27	3.88	0.81	1.24	0.78	1.04	1.02	1.12	0.74	0.93	1.14
ENSMMUG00000005699	0.11	0.04	0.12	0.35	0.41	0.53	0.23	0.38	0.02	0.02	0.01	0.01	0.01	0.04	0.06	0.04	0.01	0.01	0.07	0.06	0.08	0.01	0.05	0.04	0.01	0.03	0.02	0.13	0.22	0.12	0.11	0.16	1.55	1.09	0.37	0.45	0.62	1.03	0.38	0.74	0.06	0.09	0.04	0.07	0.04	0.07	0.03	0.07	0.04
ENSMMUG00000005705	0	0.01	0	0.02	0.01	0.02	0	0	0.03	0.01	0.04	0	0.03	0	0	0	0	0	0.02	0	0	0	0.13	0	0	0.01	0	0	0	0.1	0	0.04	0	0.01	0	0	0	0.02	0.02	0	0	0.01	0.01	0.03	0	0	0.08	0	0
ENSMMUG00000005710	0.03	0.01	0.01	0.04	0.01	0.01	0.02	0.02	0.01	0.01	0.02	0.03	0.02	0.02	0	0	0.02	0	0.04	0.01	0.02	0.04	0	0.01	0.04	0.03	0.01	0.01	0	0.07	0.02	0.01	0.07	0.05	0.01	0.06	0.03	0.02	0.01	0.05	0	0.02	0	0.08	0.03	0.01	0	0.01	0
ENSMMUG00000005713	0.03	0.02	0.01	0.05	0.04	0.02	0.03	0.05	0.01	0.01	0.05	0.04	0.03	0	0.01	0.02	0	0.01	0.03	0.01	0.01	0.01	0.05	0.07	0.03	0.1	0.02	0.04	0.03	0.1	0.01	0.04	0.08	0.07	0.16	0.05	0.09	0.07	0.08	0	0.14	0.05	0.02	0.04	0.04	0.04	0.02	0.07	0.05
ENSMMUG00000005715	0.07	0	0.06	0	0.04	0.08	0.26	0.1	0.2	0.38	0.52	0.23	0.77	0.43	0.38	0.42	0.03	0.08	0.51	0.42	0.51	0.19	0.25	0	0.06	0.01	0.07	0.06	0.02	0	0	0.18	0.75	0.53	0.28	0.34	1.22	0.51	1.05	0.59	0.33	0.34	0.6	0.2	0.98	0.24	0.28	0.55	0.38
ENSMMUG00000005716	1.03	0.62	0.61	0.48	0.92	0.79	0.59	0.48	1.41	1.24	2.85	3.82	4.95	3.96	3.45	3.74	1.43	0.52	0.84	1.8	1.68	1.63	0.82	1.37	1.07	1.03	0.83	0.2	0.27	0.88	0.48	0.41	0.99	0.64	0.51	0.65	0.85	0.55	0.64	0.92	3.51	4.52	3.09	2.75	3.75	5.07	3	2.58	2.85
ENSMMUG00000005719	0.02	0.02	0.03	0.03	0.03	0.01	0.04	0.02	0.01	0.02	0.02	0.05	0.01	0.01	0	0	0	0.05	0	0	0	0.07	0.01	0.01	0.03	0.06	0.01	0	0.01	0.01	0.02	0.02	0.04	0.02	0.03	0.02	0.05	0	0.04	0.06	0.01	0.02	0.03	0	0	0	0.02	0.04	0.03
ENSMMUG00000005725	0.1	0.74	0.18	0.24	0.09	0.22	0.16	0.29	0.04	0.09	0	0	0.1	0	0.18	0.19	0.22	0.4	0.13	0.15	0.25	0.07	0	0.07	0.57	0.21	0.21	0	0.1	0.06	0.07	0.13	0.56	0.96	0.2	0.4	0.33	0.39	0.52	0.45	0.16	0.19	0.03	0.51	0.17	0.2	0.27	0.34	0.21
ENSMMUG00000005726	0.08	0.19	0.05	0.24	0.1	0.28	0.23	0.08	0.19	0.28	0.09	0.44	0.21	0.66	0.4	0.39	0	0.07	0.08	0.09	0.2	0.57	0.22	0.17	0.07	0.13	0	0.62	0.12	0.42	0.26	0.05	0.18	0.03	0	0.27	0.18	0.38	0.06	0.16	0.4	0.18	0.15	0.46	0.32	1.01	0.61	0.34	0.31
ENSMMUG00000005728	0.05	0.01	0.05	0.02	0.01	0.01	0.01	0.01	0.07	0.07	0.03	0.1	0.06	0	0.01	0.02	0.17	0.08	0.06	0.04	0.01	0.05	0.12	0.02	0.02	0.04	0	0	0.01	0	0	0.03	0.08	0.14	0.01	0.06	0.07	0.18	0.15	0.04	0.1	0.05	0	0.08	0.11	0	0.08	0.02	0.11
ENSMMUG00000005730	46.38	48.38	90.23	70	53.8	57.86	92.66	101.63	19.3	24.06	56.7	41.01	56.84	84.09	62.18	60.63	34.96	28.36	74.1	56.1	88.35	96.63	124.94	124.56	96.78	92.62	225.37	202.99	187.2	343.9	189.95	304.37	53.51	51.18	68.99	74.04	94.99	111.88	100.01	110.94	46.48	38.7	85.37	106.39	91.88	100.16	136.28	123.58	30.97
ENSMMUG00000005731	0.27	0.18	0.19	0.09	0.13	0.09	0.13	0.15	0.13	0.23	0.09	0.18	0.19	0.06	0.07	0.14	0.1	0	0.09	0.16	0.12	0.14	0.24	0.19	0.29	0.16	0.15	0	0.5	0.12	0.11	0.32	0.79	0.72	0.6	0.59	0.94	2.08	2	1.91	0.29	0.18	0.42	0.33	0.98	0.4	0.58	0.46	0.36
ENSMMUG00000005733	0.45	0.4	0.44	0.42	0.49	0.43	0.56	0.6	0.62	1.22	0.63	0.64	1.35	1.52	1.73	1.3	1.23	1.25	1.37	1.03	2.37	2.13	5.22	3.7	0.6	0.76	0.64	0.24	1.04	1.19	0.83	1.05	38.32	40.69	15.6	30.45	31.02	34.14	18.76	25.03	1.57	1.04	3	3.09	5.57	5.39	6.5	6.43	0.44
ENSMMUG00000005735	0	0	0	0	0	0	0.01	0	0	0.01	0	0	0.01	0.01	0	0.01	0	0.03	0.02	0	0	0.06	0	0.01	0	0	0.02	0.02	0	0	0	0.09	0.04	0.08	0.09	0.02	0.02	0.02	0.01	0.02	0	0.01	0.02	0.02	0	0	0.03	0.03	0
ENSMMUG00000005736	0	0	0.04	0.04	0.02	0.01	0.01	0.02	0.01	0.01	0.02	0.03	0.01	0.03	0.02	0.05	0.07	0.01	0.03	0.05	0.02	0.01	0	0	0	0.02	0.03	0.02	0.02	0.01	0.02	0	0.4	0.58	0.54	0.34	0.27	0.52	0.54	0.43	0.03	0.06	0.03	0.05	0.07	0.03	0.11	0.13	0.06
ENSMMUG00000005745	0.23	0.14	0.3	0.13	0.14	0.33	0.21	0.16	0.16	0.27	0.26	0.23	0.27	0.35	0.24	0.37	0.15	0.09	0.25	0.22	0.19	0.5	0.35	0.4	0.25	0.16	0.19	0.13	0.28	0.22	0.21	0.26	0.62	0.99	0.68	0.53	0.41	0.39	0.54	0.61	2.22	2.11	3.03	3.36	2.91	3.47	3.22	2.53	1.24
ENSMMUG00000005753	0	0.02	0	0.01	0	0	0	0	0.05	0.01	0	0	0.02	0	0.03	0	0	0.01	0	0	0	0	0	0	0.08	0.01	0	0.03	0.03	0	0.06	0.02	0.05	0.11	0.23	0.04	0.2	0.05	0.24	0.26	0.05	0.01	0.02	0.37	0.09	0.01	0.3	0.04	0.04
ENSMMUG00000005757	0.1	0.02	0.07	0	0	0.02	0.02	0	0.05	0.05	0.15	0.1	0.08	0.03	0.19	0.31	0.42	0	0.1	0.18	0.05	0.06	0.19	0.01	0.05	0.02	0.12	0.11	0.06	0.11	0.1	0.19	0.28	0.5	0.31	0.15	0.06	0.11	0.1	0.19	0.39	0.09	0.29	0.08	0.08	0.04	0.29	0.03	0.1
ENSMMUG00000005760	0	0	0	0	0	0	0	0	0	0	0	0	0	0	0	0	0	0	0	0	0	0	0	0	0	0	0	0	0	0	0	0	0.51	0.48	0.49	0.56	0.22	0.23	0.2	0.5	0.04	0.05	0.04	0.01	0.13	0.16	0.01	0.12	0.05
ENSMMUG00000005766	31	24.38	21.55	29.77	30.61	32.27	18.86	24.39	6.95	6.2	4.94	3.98	3.85	3.57	4.72	4.67	8.08	6.5	3.89	3.05	4.14	3.25	5.24	4.98	7.52	8.09	8.84	10.01	10.69	6.78	11.62	9.03	0.91	0.89	0.39	0.43	0.34	0.45	0.51	0.45	2.51	3.35	2.53	3.05	1.16	1.67	2.46	2.18	7.06
ENSMMUG00000005769	0.29	0.19	0.33	0.4	0.32	0.38	0.27	0.33	0.48	0.66	0.44	0.38	0.31	0.47	0.37	0.37	0.4	0.38	0.22	0.22	0.23	0.28	0.39	0.27	0.36	0.25	0.4	0.32	0.32	0.48	0.33	0.35	0.91	0.6	0.57	0.73	0.94	0.52	0.62	0.64	1.01	0.87	0.87	0.82	1.05	0.79	1.07	0.82	0.92
ENSMMUG00000005778	0.87	1.23	1.59	1.08	0.47	0.99	0.82	0.81	1.5	2.28	2.87	2.42	2.84	2.94	2.09	2.96	1.34	1.95	2.08	2.27	2.06	1.98	2.18	1.39	0.95	1.62	3.56	2.46	2.02	2.04	2.38	1.62	4.43	3.94	4.33	3.19	1.45	2.12	1.8	2.29	1.26	1.29	1.29	1.26	1.84	2.06	1.63	1.95	1.49
ENSMMUG00000005782	4.14	4.12	6.09	4.37	6.93	5.57	9.43	4.73	3.92	5.68	14.27	8.72	14.69	16.01	11.05	14.04	5.66	4.87	11.14	9.6	7.92	9.97	9.21	7.05	4.11	3.85	7.14	5.87	9.06	8.56	8.81	6.6	7.03	7.66	8.93	8.06	12.06	9.14	10.69	11.59	9.24	5.66	10.82	7.03	11.72	13.62	9.55	12.58	7.97
ENSMMUG00000005783	1.62	2.03	0.91	0.94	1.58	1.03	0.75	1.03	0.73	0.72	0.56	0.54	0.89	0.41	0.64	0.87	0.79	0.65	1.22	0.77	0.4	0.61	1.41	0.76	1.02	1.04	0.64	0.25	0.58	0.53	0.84	0.53	0.32	0.35	0.14	0.3	0.34	0.37	0.55	0.3	0.82	0.75	0.96	0.69	0.8	0.22	0.4	0.55	0.55
ENSMMUG00000005792	0	0.01	0	0.01	0	0	0	0	0.01	0.01	0.02	0.01	0	0	0.02	0.01	0	0.03	0.04	0.04	0	0.01	0.03	0.03	0.03	0	0.01	0	0	0.03	0.03	0	0.02	0.01	0.03	0	0.04	0.01	0.03	0.01	0.03	0.06	0.01	0.03	0.01	0.03	0.01	0.03	0.03
ENSMMUG00000005793	0.55	0.48	0.44	0.32	0.21	0.23	0.19	0.18	0.21	0.26	0.27	0.16	0.22	0.19	0.19	0.28	0.22	0.36	0.35	0.28	0.13	0.38	0.17	0.3	0.32	0.46	0.43	0.14	0.39	0.49	0.24	0.28	0.13	0.17	0.05	0.1	0.15	0.1	0.09	0.07	0.88	0.98	0.8	0.42	0.83	0.75	0.66	0.79	1.25
ENSMMUG00000005799	0	0	0	0	0	0	0	0	0	0.11	0	0.07	0	0	0	0.03	0	0	0	0	0	0	0.04	0	0	0	0	0	0	0.32	0	0	0.1	0.02	0	0	0	0	0	0	0	0	0	0	0	0	0	0	0
ENSMMUG00000005800	0.01	0.11	0.02	0.03	0.01	0.02	0.02	0.01	0.09	0	0	0.01	0	0.01	0.02	0.03	0.03	0.03	0	0.01	0	0	0	0	0.03	0	0.02	0.03	0.02	0	0.02	0	0.03	0.01	0.04	0.01	0	0.03	0.01	0.02	0.02	0.08	0	0.01	0.02	0	0.01	0.03	0.14
ENSMMUG00000005802	4.67	4.19	7.65	5.58	4.04	6.77	3.19	3.74	10.26	34.65	14.23	9.44	38.08	18.63	10	16.81	5.39	6.66	7.42	3.97	12.34	5.61	4.14	11.23	6.87	11.38	190.33	94.49	75.25	27.4	54.44	21.66	19.67	13.31	20.12	13.82	6.64	6.89	8.03	9.12	2.94	1.39	5.78	2.66	3.14	6.32	2.2	2.54	9.5
ENSMMUG00000005805	0.1	0.05	0.02	0.06	0.15	0.1	0.11	0.08	0.03	0.02	0.02	0.01	0.05	0.04	0	0.03	0.03	0.02	0.01	0	0.04	0.02	0	0.02	0.1	0.03	0.07	0.12	0.08	0.14	0.07	0.16	0.2	0.13	0.21	0.24	0.18	0.16	0.12	0.14	0.17	0.13	0.31	0.21	0.33	0.4	0.15	0.36	0.22
ENSMMUG00000005811	0.22	0.21	1	0.37	0.3	0.26	0.52	0.3	0.09	0.06	0.3	0.22	0.24	0.67	0.36	0.23	0.38	0.14	0.39	0.24	0.28	0.6	0.25	0.84	0.79	1.16	3.85	2.44	1.58	2.85	0.64	2.08	0.5	0.43	0.68	0.65	1.11	1.04	0.7	1.08	1.16	0.88	1.72	2.35	1.85	1.44	1.51	1.55	0.4
ENSMMUG00000005814	0.2	0.25	0.33	0.22	0.33	0.57	0.3	0.2	0.53	0.42	0.51	0.39	0.22	0.2	0.38	0.17	0.1	0.28	0.08	0.44	0.2	0.4	0.25	0.1	0.35	0.37	0.13	0.08	0.14	0.1	0.23	0.02	0.79	0.46	0.62	0.7	0.26	0.55	0.39	0.54	1.74	1.65	1.26	0.91	0.5	0.79	2	0.62	2.25
ENSMMUG00000005819	0.01	0.03	0.03	0	0	0.01	0.01	0	0	0.01	0.05	0	0.02	0.06	0	0.01	0.01	0.05	0.01	0.06	0.02	0.03	0.07	0	0.01	0	0.03	0.01	0	0.08	0.03	0.04	0.01	0.07	0.03	0.03	0.01	0.01	0.01	0	0.06	0.03	0.01	0	0.04	0	0.04	0	0.09
ENSMMUG00000005822	1.37	1.38	1.22	1.41	0.64	0.9	0.81	1.08	0.6	0.92	0.72	1.51	0.36	0.48	0.41	0.71	0.8	1.15	0.98	1.07	0.92	0.85	1.09	0.76	0.46	1.65	0.93	1.71	0.58	1.64	1.66	1.88	1.46	1.63	1.07	1.47	0.96	1.01	0.84	1.12	1.08	0.81	0.94	1.96	0.81	0.65	0.6	0.88	1.14
ENSMMUG00000005832	0.15	0.14	0.27	0.11	0.08	0.12	0.28	0.14	0.28	0.35	0.66	0.38	0.49	0.25	0.31	0.48	0.29	0.38	0.56	0.53	0.23	0.38	0.3	0.21	0.23	0.36	0.46	0.21	0.13	0.13	0.19	0.26	0.39	0.32	0.56	0.4	0.31	0.21	0.38	0.42	0.44	0.52	0.66	0.47	0.48	0.48	0.48	0.37	0.5
ENSMMUG00000005835	0.26	0.2	0.34	0.35	0.19	0.09	0.81	0.53	0.13	0.2	0.35	0.45	0.15	0.23	0.6	0.48	0.39	0.3	0.95	0.53	0.25	0.18	0.81	0.61	0.23	0.2	0.3	0.15	0.35	0.08	0.75	0.46	0.56	0.56	0.76	0.95	0.29	0.15	1.23	1.24	0.88	0.71	1.14	1.05	0.84	1.06	2.23	1.65	0.73
ENSMMUG00000005836	0.91	1.12	1.82	0.88	1.09	1.11	0.93	1.05	1.25	0.74	1.28	1.13	0.81	0.8	0.96	0.98	0.64	0.69	1.11	1.15	0.76	0.3	0.55	0.45	0.59	0.62	0.92	0.42	0.9	0.37	0.76	0.87	0.67	0.65	1.05	0.76	0.8	0.7	1.08	0.63	0.9	1.42	1.79	1.11	0.82	0.86	0.85	0.99	1.42
ENSMMUG00000005837	0.14	0.23	0.06	0.1	0.13	0.04	0.35	0.11	0.17	0.12	0.2	0.19	0.18	0.14	0.03	0.14	0.11	0.04	0.11	0.06	0.05	0.05	0.04	0.07	0.03	0	0.07	0	0.2	0.12	0.05	0.04	0	0.13	0.06	0.03	0.47	0.1	0.15	0.25	0.07	0	0.02	0	0.02	0.14	0.03	0	0.09
ENSMMUG00000005842	1.13	1.06	0.95	0.79	1.08	0.91	1.37	1.06	2.71	2.28	0.98	1.88	2.23	1.64	1.57	1.65	2.16	2.09	1.47	1.81	1.7	1.46	1.01	1.18	2.04	1.4	0.97	0.99	0.6	0.9	1.07	0.61	2.57	1.29	1.5	1.65	1.33	0.72	0.64	0.48	7.24	8.77	5.51	6.38	7	5.89	6.27	5.3	7.04
ENSMMUG00000005847	0.66	0.71	0.9	0.66	0.52	0.66	0.57	0.51	2.16	2.77	2.25	2.47	1.69	1.88	1.71	2	1.38	1.04	1.33	1.64	1.14	1.26	0.96	1.22	1.32	1.22	0.83	1.31	1.04	1.17	0.81	0.95	11.37	7.82	14.44	5.68	6.87	5.13	3.91	2.4	250.41	277.66	136.67	119.85	117.94	137.73	87.55	95.13	117.5
ENSMMUG00000005853	0.04	0.04	0.02	0.01	0.04	0.03	0.01	0.07	0.05	0.06	0.02	0.02	0.03	0.01	0.02	0.02	0	0.09	0.03	0.01	0.02	0.02	0	0.02	0.01	0.08	0.07	0.07	0.05	0.13	0.11	0.06	0.04	0.06	0.06	0.11	0.04	0.08	0.07	0.09	0.06	0	0.05	0.04	0.1	0.04	0.08	0.02	0.03
ENSMMUG00000005854	3.61	3.9	5.94	3.56	3.05	3.61	3.22	2.83	11.8	11.17	15.56	13.32	12.7	12.63	10.59	10.51	10.06	9.06	8.01	11.62	8.82	8.95	10.9	6.75	8.15	8.34	3	3.93	3.08	5.42	3.44	2.7	1.08	1.1	0.63	0.71	0.9	0.84	0.65	0.74	20.78	16.77	13.29	13.97	12.45	18.36	13.18	14.14	15.88
ENSMMUG00000005860	0	0	0.09	0	0	0	0	0.05	0	0	0	0	0	0	0	0	0	0	0	0	0	0	0	0	0	0	0	0	0	0	0	0	0.04	0	0.02	0.04	0.05	0	0.02	0.12	0	0.07	0	0.01	0.26	0.22	0	0	0
ENSMMUG00000005874	0.15	0.04	0	0.04	0.36	0.1	0.14	0.1	0	0	0.26	0.16	0	0.1	0	0.14	0.05	0.09	0.43	0	0	0.25	0.05	0.15	0.37	0.25	0	0.16	0	0.09	0	0	0.85	0.69	0.55	0.53	0.25	0.66	0.47	0.52	0.61	0.37	0.9	0.73	1.2	0.1	1.21	1.15	1.86
ENSMMUG00000005882	0.13	0.22	0.12	0.14	0.18	0.16	0.24	0.33	0.13	0.09	0.1	0.08	0.07	0.11	0.08	0.21	0.09	0.08	0.23	0.05	0.14	0.13	0.08	0.04	0.06	0.06	0.19	0.08	0.09	0.15	0.12	0.13	0.53	0.45	0.43	0.76	0.27	0.37	0.62	0.71	0.21	0.28	0.14	0.42	0.21	0.07	0.29	0.26	0.23
ENSMMUG00000005890	0.08	0.4	0.24	0.16	0.27	0.4	0.23	0.14	0.25	0.03	0.06	0	0.02	0	0.03	0.14	0.02	0.12	0.09	0.02	0.04	0.16	0.01	0.01	0.09	0.12	0.17	0.23	0.14	0.18	0.02	0.04	0.86	1.66	1.05	1.42	0.47	0.57	0.33	0.91	0.41	0.42	0.1	0.21	0.02	0.12	0.05	0.16	0.24
ENSMMUG00000005902	0.32	0.37	0.49	0.16	0.21	0.26	0.21	0.22	0.98	1.04	0.92	0.82	0.73	0.81	0.82	0.76	0.62	0.64	0.72	0.66	0.55	0.71	1	0.83	0.59	0.63	0.51	0.35	0.38	0.46	0.35	0.34	0.17	0.1	0.16	0.14	0.05	0.09	0.08	0.09	3.17	2.48	1.44	1.88	1.94	1.51	2.03	1.63	1.83
ENSMMUG00000005903	1.03	1.57	3.34	2.23	1.88	1.85	1.48	1.5	5.89	5.71	10.29	9.05	9.64	8.46	8.47	8.69	3.69	3.91	6.34	7.38	6.51	6.32	8.43	7.02	4.19	3.94	3.15	2.21	1.69	3.67	2.94	2.41	2.31	3.14	1.93	2.46	2.99	1.75	2.96	2.74	12.04	12.21	16.21	17.25	15.59	20.06	14.59	15.67	10.91
ENSMMUG00000005906	0	0	0	0	0	0	0	0	0	0	0	0	0	0	0	0	0	0	0	0	0	0	0	0	0	0	0	0	0	0	0	0	1.23	1.5	2.83	2.93	6.07	6.8	9.58	6.77	2.51	2.91	3.89	3.9	4.82	3.88	6.03	5.15	1.91
ENSMMUG00000005907	0.48	0.6	0.75	0.97	0.53	0.61	0.57	0.65	0.26	0.28	0.47	0.49	0.61	0.43	0.54	0.48	0.28	0.27	0.28	0.31	0.55	0.4	0.59	0.46	0.25	0.35	0.25	0.35	0.55	0.72	0.61	0.53	0.39	0.41	0.29	0.48	0.61	0.23	0.62	0.54	0.5	0.29	0.66	0.51	0.71	0.67	0.58	0.56	0.59
ENSMMUG00000005911	0.03	0.09	0.04	0	0.02	0.06	0.08	0.07	0	0.01	0.17	0.01	0.01	0.03	0.08	0	0.01	0.08	0.09	0	0.03	0	0	0.11	0.13	0.09	0.27	0.07	0.05	0.43	0.02	0.14	0.69	0.51	0.61	1.22	0.51	1.23	0.54	0.45	0.09	0.02	0.08	0.01	0.05	0.06	0.09	0	0.02
ENSMMUG00000005918	0.05	0.12	0.01	0	0.04	0.09	0.08	0.05	0.03	0.09	0.05	0.04	0	0.17	0.02	0.04	0.06	0.1	0.04	0.02	0.16	0.08	0.16	0	0.05	0.1	0.04	0	0.19	0	0.05	0.1	0.14	0.05	0.05	0.02	0.15	0	0.06	0.1	0.06	0	0	0.12	0.05	0.08	0.12	0	0.07
ENSMMUG00000005922	0.07	0.17	0.02	0.14	0.05	0.04	0.01	0.11	0.18	0.17	0	0.11	0.05	0.02	0.2	0.05	0.03	0.14	0.19	0.2	0.09	0.01	0.02	0.02	0.09	0.15	0.11	0.02	0.07	0.04	0	0.04	0.02	0	0.01	0.03	0.06	0	0.04	0.07	0.2	0.06	0.09	0.03	0.02	0.06	0.01	0	0.25
ENSMMUG00000005927	0.22	0.21	0.21	0.27	0.36	0.3	0.23	0.33	0	0.01	0	0	0.01	0	0.02	0.02	0.02	0	0	0	0	0.06	0	0	0	0.01	0	0.15	0.01	0.02	0.02	0.04	0.04	0.02	0.04	0.01	0.03	0.01	0.05	0.01	0.03	0	0.02	0	0	0	0.09	0	0
ENSMMUG00000005943	0.28	0.2	0.19	0.18	0.13	0.19	0.3	0.61	0.19	0.03	0.34	0.26	0.22	0.37	0.32	0.15	0.08	0.11	0.27	0.32	0	0.12	0.27	0.08	0.22	0.03	0.16	0.03	0	0.04	0.2	0.04	0	0	0	0	0.07	0	0	0	0.37	0.14	0.14	0.15	0.4	0.13	0.09	0.19	0.11
ENSMMUG00000005947	1.92	2.04	1.13	1.49	0.63	1.24	1.38	1.55	1.24	1.42	2.61	3.68	2.54	4.78	3.88	2.86	1.02	1.19	2.73	3.88	2.42	3.08	3.48	2.12	1.37	1.02	0.93	2.52	1.85	3.14	1.42	1.41	0.92	1.02	1.01	1.41	1.48	1.98	0.54	0.66	1.97	2.81	2.05	3.37	4.25	3.21	3.02	2.44	0.93
ENSMMUG00000005949	0.14	0.14	0.19	0.31	0.27	0.15	0.08	0.18	0.13	0.07	0.09	0.25	0.06	0.08	0.18	0.1	0.03	0.02	0.11	0.1	0.03	0.04	0.04	0.11	0.1	0.09	0.03	0.24	0.06	0.14	0.06	0.21	0.03	0.06	0.02	0.03	0	0	0.06	0	0.08	0.06	0.12	0	0	0	0.16	0.06	0.03
ENSMMUG00000005951	11.18	9.92	19.78	10.74	9.17	8.42	7.45	8.87	11.98	11.31	28.07	26.04	29.64	35.12	32.81	33.4	11.55	8.35	21.52	17.81	25.89	27.03	41.06	33.91	16.29	14.54	21.26	14.11	12	19.34	16.33	13.54	17.98	13.44	13.57	12.82	13.15	15.15	12.79	10.71	20.8	18.56	38.52	43.74	44.1	53.51	47.96	46.39	12.32
ENSMMUG00000005955	0.57	1.17	0.95	0.85	0.52	0.8	0.67	0.71	0.34	0.17	0.64	0.87	0.46	0.41	0.6	0.52	0.12	0.46	0.92	0.75	0.52	0.45	0.53	0.32	0.48	0.51	0.81	1.26	0.56	0.67	0.66	0.54	0.2	0.19	0.33	0.35	0.06	0.28	0.35	0.22	0.16	0.34	0.66	0.85	0.27	0.48	0.47	0.25	0.69
ENSMMUG00000005956	0	0.02	0.03	0	0.02	0.03	0.01	0.03	0	0.03	0	0	0	0	0.01	0	0.01	0	0	0	0.02	0	0	0	0	0	0.03	0.02	0	0.02	0.02	0	0	0.02	0.01	0.06	0.08	0	0.05	0.04	0	0	0.05	0	0	0	0	0.07	0.1
ENSMMUG00000005964	0.06	0.11	0.24	0.09	0.1	0.06	0.16	0.12	0.14	0.27	0.35	0.25	0.17	0.25	0.21	0.37	0.18	0.13	0.37	0.28	0.13	0.18	0.2	0.12	0.11	0.12	0.16	0.09	0.1	0.05	0.09	0.15	0.31	0.24	0.27	0.21	0.2	0.12	0.2	0.31	0.3	0.17	0.25	0.22	0.24	0.15	0.17	0.27	0.3
ENSMMUG00000005967	0.06	0.03	0	0	0.02	0.04	0.02	0.01	0.01	0	0.02	0	0.03	0	0	0.01	0.06	0	0	0.02	0.03	0	0	0	0.03	0	0	0.05	0.01	0	0	0	0.11	0.01	0.02	0.03	0.08	0.04	0.01	0	0.05	0	0	0.03	0	0	0	0	0.01
ENSMMUG00000005968	0.03	0	0.05	0	0	0	0	0	0.03	0	0.05	0	0.08	0	0	0	0	0	0	0.1	0	0	0.02	0.06	0.03	0	0	0	0	0	0	0	0	0.05	0	0	0	0	0	0	0	0.05	0	0.23	0.03	0	0	0.52	0
ENSMMUG00000005977	0	0.04	0	0.01	0	0	0	0.01	0	0	0	0	0.02	0	0	0	0	0	0	0	0.01	0	0	0.03	0	0	0	0	0.03	0	0	0	0	0.02	0.01	0.03	0	0	0.03	0.03	0	0	0.02	0.05	0	0	0	0.03	0.05
ENSMMUG00000005988	0.97	0.68	0.25	0.32	0.16	0.15	0.16	0.33	0.1	0.15	0.13	0.09	0.13	0.24	0.2	0.21	0.1	0.11	0.16	0.09	0.13	0.24	0.1	0.08	0.37	0.41	0.47	0.46	0.55	0.56	0.31	0.39	0.17	0.12	0.13	0.07	0.06	0.08	0.1	0.09	0.12	0.28	0.2	0.31	0.38	0.36	0.35	0.22	0.19
ENSMMUG00000006005	2.4	2.98	3.58	2.71	2.83	3.67	3.47	1.86	10.96	12.5	12.62	10.03	9.74	8.59	9.96	9.41	10.1	8.18	13.16	14.47	10.59	8.84	13.13	11.77	5.09	4.65	2.47	1.92	2.05	2.15	3.44	1.28	0.07	0.01	0.03	0.03	0.07	0.08	0.05	0.04	10.79	13.05	8.89	7.36	7.61	6.01	5.39	7.09	13.74
ENSMMUG00000006008	0.02	0.01	0.04	0.04	0.01	0.06	0.02	0	0.01	0	0.01	0.03	0.03	0.02	0	0	0.01	0.15	0.01	0.01	0.01	0	0.02	0.03	0.03	0.02	0	0.04	0.14	0	0.05	0.06	0.04	0.03	0.05	0.02	0.17	0.07	0	0.04	0.07	0.03	0.06	0.01	0	0	0.12	0.08	0.13
ENSMMUG00000006015	0.01	0.01	0.02	0.04	0	0.01	0.01	0	0.03	0.03	0	0	0	0	0.02	0	0.04	0.02	0.03	0	0	0	0.05	0.01	0	0.07	0.04	0	0	0	0.03	0	0.16	0	0	0	0	0.02	0.06	0	0	0	0	0	0	0.01	0	0.02	0.02
ENSMMUG00000006017	0.07	0.03	0.06	0.1	0.04	0.02	0.04	0.04	0.03	0.06	0.08	0.15	0	0	0.06	0.03	0.02	0.06	0.01	0	0.04	0.19	0	0	0	0.07	0.07	0.32	0.13	0.1	0.11	0.11	0.17	0.19	0.09	0.12	0.06	0.18	0.03	0.27	0.27	0.03	0.07	0.05	0.06	0.27	0.1	0.18	0.26
ENSMMUG00000006022	0.06	0.13	0.07	0.06	0.08	0.04	0.1	0.22	0.07	0.07	0.09	0.05	0.11	0.06	0.08	0.05	0.04	0.05	0.08	0.03	0.06	0.02	0.03	0.04	0.05	0.03	0.15	0.01	0.09	0.04	0.05	0.05	0.07	0.08	0.08	0.12	0.12	0.05	0.07	0.17	0.04	0.11	0.06	0.07	0.17	0.05	0.1	0.14	0.24
ENSMMUG00000006035	0.41	0.43	0.37	0.13	0.1	0.12	0.07	0.06	0.89	0.68	0.33	0.29	0.38	0.3	0.37	0.37	0.26	0.34	0.28	0.34	0.23	0.26	0.23	0.16	0.23	0.32	0.14	0.27	0.12	0.26	0.14	0.06	0.28	0.19	0.14	0.25	0.21	0.14	0.1	0.11	0.6	0.65	0.32	0.22	0.36	0.65	0.29	0.28	0.84
ENSMMUG00000006037	0.13	0.07	0.22	0.44	0.85	0.42	0.33	0.47	0.06	0.12	0.02	0.01	0.15	0.06	0.1	0.08	0.03	0.03	0.03	0.08	0.09	0.01	0.1	0.07	0.09	0.16	0.1	0.16	0.08	0.03	0.13	0.03	0.2	0.17	0.14	0.14	0.28	0.25	0.15	0.25	0.28	0.37	0.39	0.34	0.8	0.53	0.83	0.37	0.27
ENSMMUG00000006038	0.41	0.29	0.15	0.14	0.16	0.15	0.11	0.1	0.52	0.45	0.17	0.16	0.3	0.21	0.24	0.16	0.25	0.29	0.12	0.09	0.36	0.15	0.31	0.19	0.28	0.41	0.23	0.19	0.13	0.35	0.22	0.15	0.18	0.13	0.13	0.21	0.19	0.12	0.1	0.17	0.9	1.35	0.4	0.53	0.94	0.61	0.47	0.56	0.9
ENSMMUG00000006049	0.01	0.01	0.02	0.02	0.02	0	0.01	0.01	0.02	0	0.13	0	0.11	0.01	0.01	0.02	0.03	0.03	0.06	0.01	0.01	0.01	0.01	0.01	0.02	0.02	0.02	0.02	0.02	0.02	0	0.01	0	0.03	0.03	0.04	0.02	0.02	0.06	0.04	0.01	0.02	0.02	0.01	0.06	0.01	0	0.02	0.01
ENSMMUG00000006054	0	0	0	0	0	0	0	0	0	0	0	0	0	0	0	0	0	0	0	0	0	0	0	0	0	0	0	0	0	0	0	0	0.31	0.32	0.18	0.17	0.75	0.27	0.23	0.41	0.08	0.16	0.23	0.22	0.59	0.02	0.03	0.1	0.13
ENSMMUG00000006058	1.63	1.16	1.8	1.64	0.95	1.02	1.29	1.48	0.68	1.78	2.75	2.76	2.16	3.17	2.36	1.99	1.17	1.14	1.89	2.52	2.33	2.23	2.44	1.69	1.45	1.53	3.82	3.65	2.05	5.18	2.39	3.39	2.21	1.49	2.31	2.86	2.78	2.56	2.34	3	2.19	1.05	2.52	2.44	2.32	2.29	2.93	1.89	2.11
ENSMMUG00000006061	0.1	0.18	0.2	0.06	0.13	0.08	0.13	0.09	0.38	0.25	0.23	0.22	0.16	0.28	0.23	0.17	0.34	0.49	0.13	0.11	0.2	0.48	0.21	0.06	0.33	0.24	0.08	0.16	0.1	0.18	0.18	0.06	0.23	0.26	0.29	0.26	0.25	0.16	0.34	0.25	1.05	1.2	0.74	0.93	0.56	0.89	0.75	0.61	1.41
ENSMMUG00000006067	0	0.01	0.01	0.02	0	0	0.01	0	0.01	0.1	0.01	0.03	0	0.01	0.11	0.05	0	0.05	0	0.08	0	0.04	0	0.01	0.02	0.03	0	0	0.01	0	0	0.04	0.49	0.29	0.04	0.34	0.13	0.09	0.15	0.03	0.02	0.01	0.01	0.03	0.02	0.08	0.02	0.05	0.07
ENSMMUG00000006068	15.17	15.24	10.4	6.56	4.46	3.01	3.65	6.07	8.64	13.32	8.85	8.42	8.85	6.47	7.43	7.29	13.72	15.1	8.83	10.25	10.05	5.05	5.94	5.91	11.41	12.17	6.74	6.53	9.32	6.57	7.84	7.5	4.13	3.8	2.92	3.48	4.48	2.8	2.91	4.67	13.08	13.29	8.4	7.68	9.88	5.11	7.98	8.71	25.83
ENSMMUG00000006069	0.08	0.09	0.33	0.08	0	0.1	0.05	0.06	0.81	0.67	0.66	0.36	0.5	0.52	0.59	0.39	0.38	0.36	0.65	0.5	0.64	0.55	0.54	0.28	0.36	0.26	0.15	0.21	0.28	0.21	0.06	0.12	0.01	0.04	0.02	0.02	0	0.01	0.01	0.02	0.14	0.4	0.2	0.29	0.32	0.19	0.26	0.03	0.34
ENSMMUG00000006072	0	0.01	0.02	0.02	0.01	0.01	0.03	0.02	0	0.04	0.07	0.02	0.03	0.05	0.04	0.02	0	0.01	0.02	0.01	0.04	0.01	0.02	0.04	0.01	0.02	0.04	0.07	0.07	0	0.05	0.02	0.15	0.05	0.05	0.1	0.02	0.02	0.03	0.08	0.02	0.02	0.04	0.03	0.04	0.02	0	0.05	0.03
ENSMMUG00000006081	0.03	0.04	0.05	0.04	0.03	0.08	0.04	0.02	0.09	0.07	0.1	0.07	0.13	0.08	0.06	0.08	0.06	0.03	0.12	0.04	0.1	0.1	0.05	0.02	0.02	0.06	0.04	0	0.02	0.04	0.05	0.01	0.1	0.21	0.16	0.13	0.21	0.05	0.19	0.04	0.07	0.08	0.04	0.02	0.05	0.07	0.06	0.05	0.02
ENSMMUG00000006090	0.34	0.19	0.07	0.11	0.12	0.08	0.09	0.21	0.25	0.36	0.39	0.13	0.15	0.13	0.17	0.33	0.24	0.11	0.1	0.34	0.18	0.11	0.19	0.08	0.16	0.11	0.14	0.26	0.17	0.39	0.03	0.32	0.86	0.7	0.69	0.81	0.35	1.02	0.72	0.94	0.21	0.41	0.38	0.48	0.48	0.5	0.43	0.31	0.47
ENSMMUG00000006092	0.25	0.34	0.14	0.2	0.39	0.52	0.22	0.26	0.12	0.09	0.21	0.16	0.12	0.04	0.05	0.04	0.16	0.13	0.12	0.22	0.33	0.17	0.26	0.06	0.1	0.1	0.09	0.09	0.15	0.08	0.3	0.07	0.04	0.09	0.04	0.07	0.1	0.03	0.05	0.08	0.2	0.18	0.15	0.13	0.3	0.36	0.14	0.13	0.17
ENSMMUG00000006095	1.72	2.07	1.33	0.52	0.59	0.48	1.28	1.44	0.7	0.48	1	1.29	2.63	2.47	2.82	3.59	0.3	0.91	0.97	1.14	0.77	0.87	1.04	1.61	0.49	0.52	0.37	0.63	0.48	0.99	1.01	1.69	2.08	1.81	1.97	1.51	1.52	2.53	2.1	1.72	0.42	0.66	0.71	1.03	1.84	1.81	2.12	1.34	1.2
ENSMMUG00000006096	0.15	0.01	0.08	0.12	0.14	0.06	0.12	0.01	0.05	0.05	0.09	0.03	0.08	0.15	0.2	0.11	0.21	0.03	0.14	0.11	0.04	0.17	0.33	0.06	0.12	0.04	0.1	0.08	0.06	0.11	0.09	0.09	0.1	0.06	0.21	0.16	0.11	0.3	0.26	0.2	0.45	0.33	0.69	0.47	0.25	0.61	0.63	0.47	0.16
ENSMMUG00000006099	0.19	0.1	0.05	0.11	0.1	0.09	0.14	0.06	0.01	0.18	0.18	0.33	0.07	0.28	0.12	0.36	0.33	0.12	0.11	0.34	0.04	0.44	0.23	0.38	0.12	0.16	0.05	0.09	0.08	0.2	0.07	0.03	0.13	0.15	0.05	0.17	0.25	0.09	0.18	0.11	0.25	0.24	0.09	0.27	0.22	0.21	0.42	0.09	0.12
ENSMMUG00000006106	0.04	0.06	0.04	0.02	0.05	0.04	0.13	0.07	0.07	0.09	0.03	0.04	0.06	0.02	0.1	0.03	0.06	0.06	0.05	0.05	0.06	0.1	0.14	0.03	0.1	0.07	0.04	0.02	0.02	0.03	0.03	0.02	0.11	0.1	0.03	0.04	0.02	0.02	0.09	0.05	0.13	0.13	0.16	0.05	0.07	0.13	0.2	0.04	0.11
ENSMMUG00000006108	0.07	0.03	0.04	0.03	0.07	0.06	0.07	0.07	0.04	0.02	0.01	0.04	0.05	0.04	0.03	0.02	0.01	0.02	0.03	0.01	0.02	0.05	0.03	0.05	0.03	0.04	0.03	0	0.01	0.04	0.07	0	0.06	0.07	0.02	0.05	0.03	0.02	0.02	0.02	0.02	0.02	0.06	0	0.06	0.04	0.09	0.02	0.05
ENSMMUG00000006109	0.01	0.01	0.03	0.02	0.03	0.02	0.01	0.03	0.03	0.02	0.02	0.03	0.01	0.01	0.02	0.02	0.01	0.01	0.03	0.01	0.03	0.01	0.01	0.01	0.05	0.02	0.01	0.02	0	0.01	0.03	0.03	0.01	0.01	0.03	0.03	0	0.03	0.01	0.01	0.07	0.01	0.03	0.01	0.01	0.02	0.06	0.04	0.06
ENSMMUG00000006112	0	0	0	0	0	0	0	0	0	0	0	0	0	0	0	0	0	0	0	0	0	0	0	0	0	0	0	0	0	0	0	0	0.53	0.13	0.44	0.42	0.3	0.7	0.39	0.23	0	0.27	0.53	0.7	0.51	0.46	0.19	0.29	0.32
ENSMMUG00000006113	0	0	0	0	0	0	0	0	0	0	0	0	0	0	0	0	0	0	0	0	0	0	0	0	0	0	0	0	0	0	0	0	0.12	0.06	0.18	0.08	0.09	0.19	0.23	0.49	0.16	0.06	0.75	0.98	0.42	0.56	1.3	0.34	0.07
ENSMMUG00000006115	0.52	0.6	1.78	0.65	0.4	0.41	0.84	0.59	9.65	7.23	8.95	10.12	9.13	10.2	10.11	8.28	7.37	4.89	5.01	6.05	5	6.54	7.4	5.81	8.06	5.74	2.81	1.3	0.65	1.98	1.72	0.67	9.64	11.97	11.86	13.47	10.13	13.01	9.85	13.04	27.76	26.41	30.86	29.87	20.25	30.87	20.63	27.45	14.84
ENSMMUG00000006118	0	0	0	0	0	0	0	0	0	0	0	0	0	0	0	0	0	0	0	0	0	0	0	0	0	0	0	0	0	0	0	0	0.67	1.16	0.77	0.8	0.91	0.85	0.93	1.5	1.29	1.49	1.44	1.4	1.81	3.42	2.2	2.31	0.76
ENSMMUG00000006125	0.18	0.08	0.24	0.16	0.3	0.06	0.26	0.03	0.22	0.12	0.26	0.1	0.09	0.25	0.16	0.31	0.06	0.11	0.14	0.21	0.19	0.21	0.11	0.28	0.26	0.27	0.24	0.1	0.13	0	0.12	0.46	0.21	0.18	0.3	0.16	0.5	0.22	0.57	0.32	0	0.03	0.35	0.13	0.24	0.06	0.14	0.06	0.14
ENSMMUG00000006126	0.05	0.05	0.09	0.01	0.05	0.1	0.05	0.01	0.01	0.01	0.04	0.02	0.03	0.02	0	0.06	0.02	0.02	0.07	0	0.01	0	0	0.01	0.05	0.03	0.03	0.46	0	0.13	0.02	0.04	0.02	0.01	0.06	0.03	0.02	0.02	0.03	0.04	0.01	0.04	0.02	0.07	0	0.05	0.01	0	0.05
ENSMMUG00000006133	0.03	0.09	0.16	0.02	0.14	0.1	0.07	0.18	0	0	0	0.04	0.12	0.21	0.07	0.15	0	0	0.1	0	0.05	0.16	0	0	0.03	0.03	0.16	0	0.22	0.14	0.1	0.34	0.22	0	0.06	0.16	0.13	0.11	0.28	0.08	0	0	0.12	0	0.01	0.03	0	0.03	0
ENSMMUG00000006145	0.23	0.24	0.27	0.21	0.12	0.19	0.12	0.16	0.75	0.71	0.25	0.4	0.66	0.19	0.23	0.45	0.41	0.21	0.59	0.46	0.28	0.33	0.26	0.37	0.32	0.32	0.38	0.17	0.11	0.26	0.13	0.24	5.94	3.64	4.36	3.42	4.11	2.18	3.28	3.79	0.76	0.39	0.97	0.54	0.39	0.57	0.45	0.84	0.77
ENSMMUG00000006149	0.01	0.02	0.27	0.01	0.38	0.86	0.2	0.66	0.3	0.02	0	0.02	0.04	0.12	0.04	0.34	0.01	0.09	0.04	0.07	0.06	0.21	0	0.3	0	0.3	0.07	0	0.06	0.22	0	0.16	0	0.05	0.1	0.04	0	0	0.02	0	0.01	0.98	0.25	0.12	0.13	0.67	0.06	0.61	0
ENSMMUG00000006151	0.05	0.02	0.07	0	0.01	0	0	0.02	0	0.05	0.03	0	0.07	0.02	0.05	0.03	0	0	0.03	0.02	0.04	0	0	0.05	0.02	0.02	0.01	0.06	0	0	0.11	0.14	0.09	0	0.06	0.02	0.06	0.01	0.01	0.03	0	0.03	0.01	0.01	0.01	0.14	0.02	0	0.09
ENSMMUG00000006152	0.33	0.2	0.33	0.17	0.27	0.39	0.17	0.14	0	0.05	0.44	0.37	0.06	0.46	0.25	0.27	0.35	0.31	0.6	0.03	0.27	0.26	0.1	0.23	0.36	0.14	0.23	0.18	0.32	0.19	0.14	0	0.81	0.51	0.63	0.4	0.06	0.76	0.52	0.83	0.72	0.24	0.21	0.47	0.26	0.34	0.42	0.17	0.14
ENSMMUG00000006153	0.07	0	0.01	0.03	0.02	0	0.03	0	0	0	0.02	0	0	0	0	0	0	0	0	0	0.04	0	0	0	0	0	0	0	0	0.02	0	0	0.02	0.03	0	0	0	0	0	0	0	0	0	0.08	0	0.07	0	0	0
ENSMMUG00000006156	0.87	0.92	0.99	1.26	1.49	1.64	1.06	0.91	0.26	0.44	0.37	0.33	0.6	0.39	0.37	0.3	0.4	0.31	0.38	0.31	0.42	0.43	0.3	0.37	0.48	0.61	0.68	0.69	0.81	0.78	0.7	0.57	26.67	21.93	23.21	27.67	20.7	20.42	24.25	20.46	16.48	17.27	10.99	9.26	12.54	9.09	8.67	9.22	7.18
ENSMMUG00000006169	27.98	29.12	49.95	25.55	9.88	12.28	19.36	18.66	85.06	123.64	125.32	113.78	62.35	81.51	78.55	69.9	108.64	76.97	68.51	88.89	49.96	54.02	79.34	54.87	71.46	58.77	43.17	45.51	22.65	46.38	30.33	30.99	5.88	4.02	6.78	6.93	4.56	2.49	2.93	4.83	76.26	59.96	47.88	63.86	26.87	25.31	35.82	34.57	84.94
ENSMMUG00000006171	5.63	10.65	4.24	4.54	2.73	2.49	3.05	2.72	8.93	7.59	4.4	6.14	2.73	2.83	3.1	2.57	7.44	12.09	5.04	6.23	3.97	3.11	4.28	2.72	7.91	13.14	5.75	5.33	3.3	4.52	4.03	3.65	6.25	8.8	4.54	5.29	3.82	4.71	5.32	4.77	7.56	12.61	6.39	7.3	4.37	4.51	5.05	3.46	7.27
ENSMMUG00000006172	0.86	0.71	1.03	0.78	0.98	0.77	1.1	0.69	0.81	0.83	0.63	0.99	0.97	1.17	0.9	1.16	0.67	0.72	0.99	0.44	1.06	0.58	0.79	1.22	0.33	0.63	1.27	0.61	0.58	0.88	0.85	1.02	1.42	1.34	1.59	0.9	1.34	1.13	1.41	1.5	1.31	1.74	0.89	0.63	0.84	1.5	0.73	1.15	1.07
ENSMMUG00000006179	0	0	0.01	0.03	0.01	0.01	0.02	0	0	0.02	0.02	0	0	0	0.02	0	0	0.01	0.01	0	0	0.02	0.04	0	0	0	0	0.08	0	0.02	0	0.04	0.06	0.03	0.01	0.03	0	0	0.05	0.04	0	0.02	0.02	0.12	0	0	0	0.05	0.03
ENSMMUG00000006186	0.03	0	0.06	0.05	0.05	0.05	0.03	0	0.05	0.07	0.27	0.18	0.19	0.02	0.12	0.12	0.03	0.06	0.08	0.13	0.14	0.05	0.01	0	0	0.02	0.07	0	0	0	0.03	0.02	3.44	3.38	3.65	3.14	4.04	3.49	4.14	3.98	0.13	0.14	0.09	0.02	0.05	0.08	0.05	0.1	0.06
ENSMMUG00000006192	0.24	0.16	0.57	0.12	0.7	1.07	0.79	1.1	0.25	0.89	1.05	0.52	1.9	1.68	2.08	1.43	0.86	0.54	0.6	0.65	0.91	1.21	1.56	1.07	0.32	0.26	0.4	0.18	0.62	0.61	0.73	0.95	1	1.68	1.28	1.29	3.02	3.71	3.82	3.57	0.7	0.34	0.65	0.25	0.94	1.1	1.22	1.27	1.07
ENSMMUG00000006194	0.04	0.12	0.03	0.09	0.18	0.06	0.11	0.01	0.04	0.06	0.05	0.02	0.05	0	0	0.07	0.09	0.08	0.09	0.13	0	0	0.05	0.06	0	0.08	0.02	0.15	0.07	0.26	0.09	0	0.07	0.05	0.11	0.1	0.15	0.26	0.12	0.05	0.15	0.01	0.13	0.04	0.01	0.05	0.03	0.07	0.19
ENSMMUG00000006199	3.74	2.8	8.72	4.73	5.85	5.81	3.75	3.94	28.17	17.53	16.26	16.2	16.1	18.69	15.13	12.9	13.7	12.82	10.67	13.7	9.74	10.56	10.57	9.29	7.79	10.3	7.62	5.76	4.04	8.38	5.43	5.29	0.86	0.83	0.83	1.08	1.12	0.95	1.1	0.94	18.19	22.65	11.01	10.2	9.37	16.57	7.04	7.71	25.95
ENSMMUG00000006208	0.13	0.2	0.08	0.14	0.14	0.16	0.14	0.16	0.06	0.09	0.02	0.06	0.04	0.05	0.07	0.12	0.04	0.04	0.07	0.04	0.01	0.07	0.04	0.02	0.05	0.07	0.1	0.12	0.05	0.14	0.09	0.06	2.61	1.22	1.11	1.6	0.28	0.58	0.65	0.54	0.35	0.32	0.14	0.26	0.4	0.41	0.74	0.61	0.34
ENSMMUG00000006211	0.02	0.02	0.08	0	0	0.02	0.04	0.03	0.02	0.03	0.03	0.03	0.02	0.03	0.06	0.06	0	0.06	0.06	0.03	0.07	0.04	0.11	0.04	0.01	0.02	0.02	0.08	0.04	0.05	0.1	0.16	0.27	0.12	0.04	0.13	0.04	0.08	0.07	0.08	0.22	0.01	0.03	0.08	0	0.04	0.02	0.03	0.06
ENSMMUG00000006213	0.38	0.6	1.59	0.52	0.28	0.5	0.65	0.5	0.13	0.1	0.32	0.1	0.21	0.55	0.11	0.27	0.19	0.13	0.73	0.35	0.56	0.78	0.8	0.5	0.75	1.74	4.53	2.1	1.31	2.98	1.79	3.3	0.39	0.55	1.05	0.93	0.78	0.74	0.57	0.69	0.17	0.15	1.14	0.71	0.54	0.29	0.91	0.88	0.14
ENSMMUG00000006227	4.56	4.32	11.12	3.76	2.24	2.59	2.13	3.2	21.19	17.97	15.3	13.88	9.34	11.3	10.34	11.7	16.04	13.57	10.44	11.69	8.32	9.38	10.65	10.22	13.64	14.29	15.04	6.39	6.01	8.83	8.04	7.97	7.19	5.68	5.1	5.85	5.43	4.93	4.58	5.55	17.22	20.76	14.47	13.78	7.43	8.05	7.33	10.59	21.85
ENSMMUG00000006230	0.03	0.05	0.02	0.02	0.02	0.01	0.02	0.03	0.01	0.02	0.04	0	0.04	0.12	0.06	0.06	0.01	0.02	0.08	0.03	0.04	0.01	0.01	0.02	0.02	0.03	0.03	0.03	0.02	0.01	0	0.01	0.05	0.05	0.04	0.04	0.07	0.08	0.02	0.04	0.03	0.01	0.04	0.04	0.02	0.19	0.03	0.09	0.1
ENSMMUG00000006232	0.02	0.04	0.04	0	0.04	0.02	0.06	0	0.26	0.03	0.1	0.16	0.06	0	0.03	0	0	0	0.02	0	0	0	0	0.12	0.02	0.07	0.09	0.07	0.03	0	0.16	0	0.1	0.05	0.08	0.05	0.3	0.03	0	0.15	0.02	0	0.14	0.05	0	0.07	0.05	0.1	0.16
ENSMMUG00000006236	0.04	0.09	0.06	0.07	0.03	0.04	0.05	0.08	0.03	0.07	0.07	0.04	0.05	0.06	0.03	0.05	0	0.03	0.06	0.05	0.01	0.05	0.04	0.06	0.07	0.03	0.06	0.05	0.08	0.05	0.02	0.09	0.04	0.02	0.07	0.06	0.06	0.06	0.09	0.06	0.03	0.07	0.02	0.07	0.06	0.04	0.03	0.08	0.04
ENSMMUG00000006237	0.12	0.04	0.05	0.04	0.15	0.07	0.1	0.1	0.33	0.29	0.95	0.72	0.92	1.11	0.79	0.95	0.4	0.54	0.61	0.83	0.91	1	0.38	0.16	0.2	0.25	0.19	0.03	0.13	0.23	0.2	0.22	0.84	0.6	0.78	0.84	1.34	1.08	0.51	0.43	0.99	0.75	0.74	0.34	1.05	1	0.66	0.88	0.61
ENSMMUG00000006238	0	0	0	0	0	0	0	0	0	0	0	0	0	0	0	0	0	0	0	0	0	0	0	0	0	0	0	0	0	0	0	0	0.02	0	0.01	0.01	0.01	0.06	0.01	0.01	0	0	0.02	0.04	0	0	0	0.02	0.01
ENSMMUG00000006241	0.15	0.03	0.3	0.45	0.17	0.59	0.25	0.26	0.14	0.1	0.13	0.13	0.12	0.31	0.31	0.17	0.07	0.25	0.04	0.2	0.24	0.15	0.1	0.68	0.14	0.1	0	0	0	0	0.15	0.15	174.98	179.5	169.86	180.58	176.75	157.06	145.74	165.39	83.19	100.03	93.11	92.71	95.24	92.69	93.59	95.28	151.24
ENSMMUG00000006242	0	0	0	0	0	0	0	0	0	0	0	0	0	0	0	0	0	0	0	0	0	0	0	0	0	0	0	0	0	0	0	0	1.22	0.77	0.7	0.82	0.55	0.55	0.48	0.56	0.33	0.16	0.07	0.3	0.03	0.07	0.03	0.36	0.13
ENSMMUG00000006248	0.24	0.32	0.24	0.23	0.48	0.13	0.2	0.13	1.66	2.03	0.77	1.48	1.44	0.75	1.11	1.24	1.25	1.3	0.98	1.2	0.95	0.76	0.5	0.64	0.47	0.92	0.11	0.19	0.22	0.27	0.14	0.06	0.59	1.48	0.79	0.97	1.34	0.36	0.66	1.16	3.07	3.55	2.37	2.77	3.9	2.11	1.83	2.06	4.44
ENSMMUG00000006249	0.04	0.03	0.02	0.02	0.05	0.03	0.01	0.01	0.03	0.23	0.56	0.47	0.81	0.74	0.77	0.68	0.06	0.14	0.22	0.72	0.28	0.24	0.35	0.19	0.08	0	0.03	0.07	0.18	0	0.02	0	0.28	0.44	0.4	0.29	1.04	0.63	0.85	0.93	0.2	0.18	0.48	0.23	0.36	0.94	0.16	0.52	0.7
ENSMMUG00000006257	3.55	4.36	2.34	3.47	2.76	4.54	4.38	4.21	1.92	1.68	3.14	2.67	4.53	4.95	5.06	4.82	1.78	1	3.53	2.63	3.21	5.02	6.96	4.81	2.36	1.94	2.94	2.74	2.15	2.79	3.18	1.97	2.56	2.65	2.67	3.15	3.16	3.81	3.8	2.69	2.59	1.52	3.23	3.02	2.19	4.37	3.31	3.18	1.44
ENSMMUG00000006263	0.02	0.01	0.01	0	0.03	0.03	0.04	0	0.01	0.01	0	0.03	0.04	0.02	0.02	0	0.01	0.01	0.01	0	0.01	0.01	0.02	0	0	0.02	0	0.02	0	0.03	0.01	0	0.02	0.01	0	0.01	0	0.08	0.03	0.02	0.03	0.05	0.04	0.05	0.02	0.04	0	0	0.01
ENSMMUG00000006266	1.19	1.26	3.81	1.68	1.34	1.95	1.5	2.11	2.11	1.92	5.55	2.47	2.92	4.2	2.2	2.41	2.97	2.13	6.55	2.49	2.85	3.66	2.99	3.14	2.37	2.01	4.31	3.02	2.3	4.1	2.99	2.76	0.85	0.86	3.12	2.31	1.23	3.7	3.15	4.58	4.57	5.21	9.24	5.9	3.3	7.39	5.46	8.92	3.63
ENSMMUG00000006268	0.64	0.39	0.98	0.76	0.36	0.4	0.63	0.5	0.56	1.15	1.63	1.21	1.9	0.98	1.27	1.95	1.06	0.78	1.59	2.19	0.84	1.37	0.24	0.62	0.52	0.43	1.05	0.64	0.52	0.95	0.72	0.53	3.91	3.15	3.42	6.3	4.39	3.94	5.69	4.72	2.5	1.98	2.33	1.95	2.53	1.92	2.39	3.08	1.63
ENSMMUG00000006269	0.2	0	0.17	0.06	0.08	0.08	0.08	0.11	0	0.06	0.04	0.04	0.14	0.09	0.12	0.03	0.02	0.02	0.46	0.14	0.19	0.33	0.28	0.14	0.03	0	0.21	0	0	0.04	0.04	0	0.07	0	0.3	0.21	0.22	0.19	0.03	0.17	0.08	0.1	0.21	0.4	0	0.09	0.05	0.15	0.03
ENSMMUG00000006271	0.02	0	0.01	0.01	0.06	0.04	0	0.04	0	0	0.04	0	0	0.02	0.02	0	0	0	0.01	0	0	0	0	0	0.03	0.03	0	0	0	0.22	0	0.02	0	0.06	0.08	0.03	0	0.05	0.02	0	0	0.05	0.09	0.12	0.29	0.03	0	0	0
ENSMMUG00000006272	0	0.05	0	0.01	0	0	0	0.02	0	0	0	0.02	0	0	0	0	0	0.01	0	0	0	0	0	0	0.02	0.1	0	0	0	0	0	0	0	0.02	0.01	0	0	0	0	0	0	0	0	0	0	0.02	0	0	0
ENSMMUG00000006278	0	0	0	0.01	0	0.02	0.01	0	0.01	0.01	0.04	0	0.02	0.02	0	0	0	0	0.01	0.01	0	0.01	0	0	0.01	0	0.02	0	0.07	0.05	0	0	0.03	0	0.01	0.01	0.02	0.02	0.01	0.06	0.01	0.02	0	0	0.04	0.01	0.01	0	0
ENSMMUG00000006290	0	0	0.25	0.06	0.05	0.02	0.19	0.25	0.19	0.03	0.02	0.02	0	0.03	0.07	0.09	0.02	0.01	0.11	0.15	0.1	0.13	0.13	0.12	0	0.05	0.16	0.15	0.13	0.38	0.1	0.59	0.15	0.07	0.08	0.05	0.33	0.26	0.25	0.17	0.09	0	0.23	0.16	0.48	0.54	0.25	0.67	0.07
ENSMMUG00000006291	0.17	0.09	0.17	0.24	0.19	0.13	0.17	0.17	0.07	0.24	0.1	0.2	0.14	0.09	0.17	0.19	0.15	0.13	0.16	0.19	0.12	0.13	0.13	0.12	0.21	0.07	0.11	0.3	0.32	0.22	0.28	0.33	0.21	0.18	0.13	0.28	0.08	0.11	0.12	0.14	0.1	0.11	0.1	0.11	0.15	0.15	0.2	0.22	0.19
ENSMMUG00000006295	0.11	0.05	0.13	0.09	0.32	0.24	0.24	0.24	0.06	0.11	0.1	0.11	0.15	0.12	0.06	0.08	0.1	0.11	0.08	0.09	0.13	0.18	0.07	0.08	0.05	0.09	0.1	0.1	0.08	0.1	0.11	0.13	0.18	0.21	0.21	0.07	0.16	0.14	0.1	0.12	0.23	0.22	0.14	0.09	0.1	0.14	0.1	0.12	0.15
ENSMMUG00000006300	0.15	0.12	0.02	0.15	0.07	0.06	0.09	0.06	0	0.01	0	0	0.01	0.01	0.01	0.02	0	0	0.02	0	0.01	0.01	0	0.01	0.13	0.35	0.25	0.07	0.06	0.1	0.05	0.05	0.05	0.07	0.06	0.06	0.07	0.04	0.04	0.03	0.01	0	0.01	0.02	0.02	0.03	0	0.01	0.01
ENSMMUG00000006301	0.01	0.03	0.04	0	0.01	0	0.02	0.02	0.01	0.02	0.01	0	0.03	0.05	0.01	0.01	0.01	0	0.03	0	0	0.02	0	0.03	0	0.01	0	0	0.06	0	0.02	0.03	0.04	0.03	0.01	0	0.03	0.02	0.01	0.05	0	0.05	0	0.04	0.03	0.02	0.02	0.03	0.03
ENSMMUG00000006302	0.26	0.25	0.1	0.14	0.1	0.06	0.07	0.07	0.05	0.01	0.03	0.01	0.03	0.07	0.01	0.06	0.06	0.05	0.03	0.02	0.03	0.04	0.01	0.01	0.09	0.44	0.32	0.2	0.29	0.2	0.04	0.03	0.28	0.33	0.5	0.32	0.53	0.2	0.59	0.33	0.31	0.39	0.24	0.14	0.29	0.24	0.15	0.13	0.28
ENSMMUG00000006303	0.1	0.05	0.07	0.05	0.05	0.19	0.1	0.09	0.09	0.08	0.07	0.08	0.06	0.09	0.06	0.13	0.16	0.08	0.16	0.04	0.16	0.1	0.04	0.06	0.12	0.04	0.1	0.28	0.05	0.27	0.06	0.11	0.9	1.43	0.47	0.36	0.37	0.78	0.5	0.7	0.07	0.12	0.17	0.06	0.17	0.12	0.17	0.1	0.07
ENSMMUG00000006306	0.03	0.01	0.02	0	0.01	0.02	0.01	0.01	0	0	0	0.03	0.03	0	0.01	0.01	0	0	0.03	0.01	0	0	0.03	0.02	0	0	0.02	0	0.01	0.01	0.03	0.04	0.05	0.02	0.01	0.04	0.03	0.03	0.01	0.05	0.02	0.01	0.02	0.01	0.07	0.06	0.02	0.01	0
ENSMMUG00000006317	0.6	0.6	0.99	0.64	0.48	0.35	0.45	0.46	0.39	0.59	0.31	0.36	0.48	0.2	0.35	0.48	0.47	0.52	0.34	0.49	0.39	0.31	0.14	0.18	0.69	0.77	0.87	0.75	0.84	0.62	0.37	1.05	0.43	0.34	0.42	0.06	0.31	0.23	0.13	0.19	0.21	0.24	0.57	0.34	0.3	0.33	0.21	0.39	0.67
ENSMMUG00000006320	0.03	0.01	0.03	0.03	0	0.01	0	0	0.03	0.03	0	0.05	0.02	0.07	0.01	0.03	0.04	0	0.13	0.02	0.07	0.07	0.01	0.05	0.03	0.09	0.05	0.07	0	0	0.04	0.02	0.02	0.02	0.05	0.04	0.14	0.08	0.02	0.06	0	0.02	0	0.09	0	0	0	0	0.05
ENSMMUG00000006333	0.9	0.6	1.12	0.61	0.97	0.93	0.44	0.62	1.92	1.38	0.54	0.77	1.43	1.44	1.11	0.95	1.46	1.53	0.46	0.87	0.51	0.88	0.79	0.81	0.44	1.35	0.7	0.84	0.8	1.15	0.87	0.24	0.27	1.13	0.32	0.17	0.74	0.4	0.59	0.69	1.33	1.01	1.05	0.76	0.59	0.64	0.3	0.87	3.02
ENSMMUG00000006334	0.05	0.04	0.06	0.09	0.07	0.12	0.08	0.1	0.11	0.04	0.08	0.08	0.1	0.1	0.07	0.1	0.05	0.03	0.08	0.1	0.1	0.14	0.03	0.09	0.03	0.07	0.06	0.04	0.01	0.15	0.06	0.02	0.06	0.07	0.11	0.15	0.12	0.06	0.13	0.09	0.29	0.45	0.27	0.41	0.37	0.39	0.23	0.32	0.19
ENSMMUG00000006337	0.09	0.09	0.06	0.09	0.13	0.07	0.09	0.04	0.17	0.07	0.12	0.19	0.15	0.05	0.13	0.06	0.03	0.03	0.09	0.06	0.02	0.14	0.02	0.02	0.05	0.12	0.13	0.12	0.08	0.1	0.17	0.1	0.15	0.36	0.42	0.31	0.27	0.25	0.63	0.36	0.21	0.07	0.05	0.17	0.26	0.13	0.27	0.2	0.07
ENSMMUG00000006339	0.18	0.12	0.44	0.09	0.07	0.09	0.1	0.17	1.45	2.42	2.31	1.48	1.03	0.69	0.73	1.01	1.52	1.01	0.79	1.01	0.43	0.33	0.83	0.75	1.27	0.79	0.31	0.87	0.43	0.47	0.48	0.32	0.03	0.06	0.07	0.07	0	0.03	0.05	0.01	1.74	0.89	0.36	0.3	0.12	0.06	0.23	0.28	3.32
ENSMMUG00000006341	0.32	0.71	0.5	0.64	0.68	0.19	1.33	0.25	1.72	1.87	1.58	2.14	1.28	0.71	3.18	0.67	0.94	1.25	0.99	1.66	0.81	0.72	2.27	0.48	1.08	0.99	0.54	0.72	0.19	0.42	1.43	0.48	0.25	0.46	0.08	0.88	0.28	0.07	1.74	0.26	2.16	1.98	1.17	2.55	0.53	0.35	2.42	0.74	1.67
ENSMMUG00000006343	0.61	0.54	0.53	0.47	1.44	0.67	0.9	0.81	0.89	0.84	0.67	0.6	1.02	0.68	0.93	1.2	0.47	0.34	0.51	0.49	0.59	0.43	0.74	0.85	0.46	0.75	0.45	0.69	0.74	0.88	0.68	0.79	3.13	1.99	2.07	2.1	3.75	3.88	3.38	3.5	2.81	1.71	2.23	1.73	4.14	2.03	3.55	3.41	2.75
ENSMMUG00000006347	0	0.01	0.02	0	0.02	0.01	0.02	0.01	0.02	0.02	0.01	0.02	0.01	0.01	0.01	0.01	0.02	0.02	0.01	0.01	0.03	0.01	0.01	0.04	0.01	0.01	0.01	0.01	0.01	0.02	0.01	0.02	0.03	0.02	0.02	0.02	0.03	0.01	0.02	0.05	0.03	0.03	0.01	0.01	0.04	0.02	0.01	0.05	0.03
ENSMMUG00000006365	0	0	0	0	0	0	0	0	0	0	0	0	0	0	0	0	0	0	0	0	0	0	0	0	0	0	0	0	0	0	0	0	0.02	0.12	0.13	0.04	0.13	0.24	0.08	0	0.02	0.02	0	0.23	0.03	0.03	0.18	0.12	0.17
ENSMMUG00000006366	0.01	0.02	0.01	0	0.02	0.01	0.01	0.04	0.02	0.04	0.03	0.05	0.02	0.08	0	0.01	0.02	0.03	0.05	0	0.01	0.11	0.01	0.03	0.06	0	0.01	0	0.1	0.02	0.05	0.02	0.09	0.18	0.05	0.14	0.05	0.41	0.04	0.18	0.06	0.12	0.25	0.04	0.31	0.18	0.18	0.25	0.06
ENSMMUG00000006374	1.2	1.12	2.27	1.13	0.85	0.8	0.56	0.7	2.7	2.17	1.42	1.51	1.05	1.15	1.53	1.5	1.07	1.37	0.93	1.33	0.72	0.39	0.4	0.37	1.25	1.02	1.93	1.32	1.61	1.16	1.61	1.81	0.58	0.12	0.19	0.13	0.13	0.21	0.05	0.22	2.06	3.59	2.23	2.06	1.44	2.61	1.81	2.29	7.57
ENSMMUG00000006384	0.04	0.14	0.03	0.08	0.04	0.01	0.06	0.03	0.08	0.02	0.13	0.18	0.05	0.08	0.06	0.12	0.04	0.02	0.07	0.04	0.1	0.33	0.19	0.17	0.02	0.01	0.05	0	0	0.01	0.15	0.06	0.04	0.05	0	0.07	0.1	0.02	0.11	0.09	0.06	0.04	0.2	0.15	0.25	0.18	0.28	0.05	0.07
ENSMMUG00000006385	0.07	0.22	0.27	0.18	0.1	0.14	0.45	0.14	0.18	0.21	0.39	0.27	0.16	0.16	0.41	0.26	0.2	0.37	0.32	0.29	0.14	0.28	0.43	0.07	0.14	0.43	0.38	0.28	0.09	0.33	0.59	0.46	0.46	0.35	0.56	0.66	0.75	0.44	0.77	0.49	0.27	0.32	0.55	0.4	0.2	0.27	0.5	0.28	0.22
ENSMMUG00000006388	0.17	0.12	0.17	0.22	0.21	0.24	0.19	0.27	0.12	0.28	0.17	0.26	0.43	0.36	0.22	0.24	0.21	0.2	0.2	0.28	0.14	0.18	0.22	0.25	0.12	0.2	0.5	0.48	0.25	0.51	0.3	0.3	2.43	1.64	0.6	1.17	0.36	0.38	0.45	0.6	0.25	0.13	0.14	0.18	0.15	0.19	0.11	0.2	0.17
ENSMMUG00000006393	0.23	0.04	0.21	0.27	0.07	0.16	0.05	0.01	0.12	0.12	0.27	0.34	0.2	0.17	0.22	0.19	0.32	0.12	0.18	0.16	0.26	0.13	0.1	0.06	0.37	0.08	0.17	0.27	0.14	0.24	0	0.05	0.73	0.43	0.6	0.39	0.47	0.46	0.34	0.63	0.23	0.13	0.48	0.44	0.16	0.2	0.23	0.25	0.47
ENSMMUG00000006394	0.1	0.09	0.18	0.1	0.05	0.17	0.05	0.06	0.05	0.09	0.18	0.14	0.04	0.21	0.07	0.09	0.02	0.12	0.13	0.07	0.15	0.11	0.05	0.08	0.21	0.2	0.12	0.3	0.06	0.22	0.06	0.02	0.4	0.11	0.73	0.3	0.31	0.42	0.41	0.33	0.08	0.1	0.39	0.13	0.11	0.17	0.15	0.16	0.12
ENSMMUG00000006400	0.01	0	0.02	0.01	0	0	0	0.01	0.06	0.02	0.02	0	0.02	0.02	0.02	0.04	0.02	0	0.02	0.01	0	0	0.04	0.01	0	0.04	0.01	0	0	0	0.02	0.01	0.02	0.03	0.01	0.02	0	0	0	0.04	0.02	0.01	0	0.01	0	0.01	0	0	0
ENSMMUG00000006401	0	0	0	0	0	0	0	0	0	0	0	0	0	0	0	0	0	0	0	0	0	0	0	0	0	0	0	0	0	0	0	0	0.08	0.06	0.19	0.15	0.23	0.14	0.18	0.16	8.2	6.54	5.77	3.85	6.17	5.07	4.33	4.37	3
ENSMMUG00000006403	2.59	2.38	3.14	3.65	4.61	4.38	2.8	4.24	2.67	3.24	8.19	6.22	7.28	7.82	6.04	7.38	2.7	2.24	8.42	5.44	7.96	9.03	14.81	10.04	2.15	2.12	2.63	2.47	2.46	2.65	3.74	2.9	91.17	118.1	93.31	98.3	85.58	129.73	93.33	108.47	17.57	18.59	25.61	24.7	24.2	32.68	25.26	33.02	11.39
ENSMMUG00000006408	1.76	1.43	1.96	1.57	1.19	1.01	0.73	1.59	0.96	1.14	1.44	1.26	1.61	1.02	0.84	1.77	0.75	0.57	0.77	0.74	0.77	0.45	0.69	0.98	1.43	0.72	2.42	3.09	4.71	1.75	1.72	3.2	0.37	0.17	0.21	0.26	0.44	0.33	0.25	0.23	1	0.51	0.76	1.13	1.16	0.66	0.79	1.08	1.37
ENSMMUG00000006417	0.85	1.08	1.05	1.14	0.92	1.71	1.02	0.79	0.72	1.18	0.62	1.02	0.79	0.43	1.26	1.2	0.86	0.65	0.62	0.11	0.98	1.52	0.47	0.67	0.7	0.91	0.53	0.21	0.79	0.82	1.47	0.99	1.14	1.22	0.44	1.23	1.06	1.18	1.72	0.79	0.7	0.87	1.41	0.32	0.81	0.8	1.47	1.4	0.66
ENSMMUG00000006419	0.1	0.19	0.21	0.15	0.21	0.1	0.13	0.19	0.13	0.11	0.06	0.18	0.13	0.22	0.16	0.08	0.24	0.26	0.16	0.08	0.18	0.26	0.1	0.15	0.21	0.15	0.15	0.15	0.04	0.07	0.19	0.06	2.07	1.65	1.93	1.99	1.85	1.7	2.25	1.86	1.71	1.34	1.5	1.27	1.28	1.43	1.68	1.13	1.04
ENSMMUG00000006423	0.08	0.14	0.02	0.02	0.06	0.1	0.02	0.04	0.05	0	0	0.04	0.08	0.03	0.05	0.11	0.04	0.13	0	0.03	0.1	0.22	0.11	0.16	0.11	0.08	0.02	0.19	0.08	0.14	0.05	0.12	0.22	0.36	0.43	0.31	0.56	0.26	0.39	0.22	0.08	0.08	0.11	0.04	0.13	0.15	0.02	0.13	0.14
ENSMMUG00000006424	0	0	0	0	0.05	0.02	0	0	0.03	0	0.04	0	0	0	0.07	0	0	0	0	0	0	0.23	0	0	0.03	0	0	0	0	0	0	0	0.39	0.06	0.24	0.13	0	0	0.31	0.3	0.09	0.05	0.02	0.02	0.05	0.03	0.11	0.09	0.03
ENSMMUG00000006425	0.15	0.17	0.03	0.1	0.1	0.21	0.59	0.18	0.23	0.05	0	0.12	0.06	0.38	0.05	0.05	0.11	0.14	0	0	0.12	0.26	0.07	0.04	0.18	0.05	0.12	0	0.16	0.33	0.15	0.29	0.51	0.68	1.23	1.25	0.37	1.03	0.81	0.9	5.09	3.5	1.06	3.32	2.51	1.71	1.12	1.67	1.97
ENSMMUG00000006431	0.05	0.03	0.22	0.04	0.12	0.11	0.09	0.11	0.91	0.31	0.69	0.79	0.89	0.54	0.76	1.06	0.35	0.43	0.97	0.82	0.53	0.43	0.27	0.58	0.53	0.48	0.3	0.27	0.09	0.15	0.26	0.24	0.11	0.1	0.17	0.2	0.21	0.11	0.1	0.23	1.96	2.46	3.17	3.05	3.38	1.43	2.53	3.18	0.96
ENSMMUG00000006441	0.05	0.02	0	0	0	0	0	0.01	0.01	0.01	0.05	0.01	0.02	0	0.02	0.02	0.04	0	0	0.05	0.11	0.1	0.05	0.01	0.03	0	0.02	0.01	0.03	0.02	0.01	0	0.03	0.13	0.12	0.27	0.13	0.22	0.12	0.17	0.3	0.06	0.17	0.32	0.94	0.1	0.22	0.22	0.29
ENSMMUG00000006445	0	0	0	0.01	0	0.02	0.03	0.01	0	0	0	0.02	0.03	0	0.01	0	0	0	0	0	0	0	0	0.01	0	0	0.09	0.11	0.05	0.08	0.18	0.14	0	0	0	0	0.01	0	0	0.04	0	0	0	0.02	0.02	0	0.01	0	0.01
ENSMMUG00000006452	0.68	0.42	0.63	0.49	0.5	0.4	0.31	0.43	0.91	0.99	1.55	0.94	1.59	1.56	1.27	1.06	1.2	0.53	1.3	1.02	1.1	1.56	1.16	1.33	0.81	0.92	0.76	0.56	1.28	1.41	0.92	0.93	0.59	0.46	0.69	0.8	0.89	1.84	0.93	1.21	1.31	1.77	1.83	1.08	1.64	1.56	1.44	1.2	1.16
ENSMMUG00000006463	0.14	0.11	0.36	0.28	0.18	0.05	0	0.19	0.06	0.03	0.25	0.12	0.11	0	0.03	0.04	0.07	0.02	0.25	0.26	0.05	0	0.18	0.2	0	0.06	0.34	0.36	0.18	0.08	0	0.05	0	0.17	0.59	0.42	0.52	0.28	0.04	0.09	0.05	0.13	0.28	0.51	0.03	0.05	0.17	0.06	0.12
ENSMMUG00000006464	0	0	0	0	0	0.01	0.02	0.01	0	0.01	0	0	0	0.01	0	0.01	0.01	0	0	0	0.01	0.01	0	0	0	0.02	0.02	0.01	0.04	0	0	0	0.02	0.06	0.06	0.01	0.03	0.02	0.03	0.03	0.06	0.05	0.03	0	0.01	0.04	0.09	0.01	0.01
ENSMMUG00000006469	0.08	0.05	0.11	0.04	0.2	0.12	0.09	0.1	0.08	0.3	0.51	0.23	0.47	0.56	0.4	0.43	0.21	0.54	0.25	0.24	0.15	0.1	0.06	0.1	0.07	0.05	0.05	0.08	0.08	0.21	0.19	0.07	0.37	0.43	0.17	0.19	0.44	0.14	0.15	0.42	0.17	0.18	0.31	0.19	0.13	0.23	0.2	0.17	0.21
ENSMMUG00000006474	0.11	0	0.06	0	0.02	0.02	0.05	0.03	0.05	0.15	0.17	0.1	0.33	0.22	0.42	0.4	0.03	0.05	0.11	0.08	0.07	0.04	0.05	0.08	0.01	0.04	0	0.03	0.01	0.03	0.1	0.1	0.16	0.14	0.04	0.12	0.29	0.11	0.1	0.23	0.11	0.03	0.06	0.09	0.22	0.07	0.16	0.43	0.26
ENSMMUG00000006478	0.08	0.07	0.08	0.05	0.1	0.07	0.1	0.1	0.09	0.1	0.07	0.15	0.07	0.06	0.05	0.04	0.13	0.09	0.04	0.07	0.03	0.08	0.05	0.06	0.1	0.1	0.1	0.07	0.06	0.07	0.14	0.11	0.11	0.05	0.07	0.06	0.08	0.09	0.1	0.05	0.02	0.1	0.06	0.08	0.11	0.1	0.04	0.04	0.07
ENSMMUG00000006485	0.11	0.1	0.13	0.12	0.17	0.15	0.21	0.12	0.15	0.13	0.12	0.12	0.06	0.15	0.05	0.11	0.25	0.2	0.21	0.09	0.11	0.16	0.04	0.1	0.15	0.24	0.11	0.25	0.11	0.15	0.12	0.07	0.46	0.53	1.1	0.63	0.47	0.49	0.5	0.43	0.11	0.16	0.08	0.14	0.04	0.05	0.16	0.09	0.09
ENSMMUG00000006496	0.04	0	0.05	0	0	0.08	0	0.01	0.05	0.05	0	0.09	0.1	0.05	0.05	0.1	0.1	0.12	0.02	0.05	0.17	0.01	0	0.04	0	0.05	0	0	0.19	0	0	0.05	0.02	0.01	0.03	0.02	0	0.08	0.04	0.16	0.06	0.04	0.04	0	0.03	0.07	0.07	0	0.03
ENSMMUG00000006497	0.03	0.01	0.01	0.03	0.01	0.03	0.01	0.03	0.05	0.01	0.01	0.01	0	0.01	0.02	0.03	0.04	0.02	0.02	0.01	0.05	0.03	0.02	0.06	0.03	0.02	0.02	0.03	0.02	0.03	0.02	0	0.04	0.02	0.11	0.07	0.03	0.03	0.07	0.06	0.04	0.05	0	0	0.02	0.05	0.02	0.02	0.02
ENSMMUG00000006501	0.1	0.05	0.09	0.05	0.02	0.1	0.01	0.08	0.09	0.02	0.01	0.01	0.01	0.02	0	0.01	0.05	0.08	0.02	0.03	0.01	0	0.05	0.06	0	0.01	0	0.09	0.01	0.05	0.02	0	0.09	0.02	0.02	0.07	0.07	0	0.07	0.12	0.04	0	0.11	0.08	0.1	0.03	0.04	0.03	0
ENSMMUG00000006502	0.13	0.25	0.13	0.09	0.32	0.26	0.25	0.15	0.07	0.1	0	0	0.1	0	0.04	0.04	0.05	0.03	0.04	0.08	0.05	0.07	0.04	0	0.11	0.24	0.09	0.08	0.24	0	0.21	0.06	0.28	0.42	0.18	0.35	0.4	0.21	0.33	0.75	0.07	0.04	0.12	0.03	0.12	0	0.02	0	0.19
ENSMMUG00000006504	0	0	0	0	0	0	0	0	0	0	0	0	0	0	0	0	0	0	0	0	0	0	0	0	0	0	0	0	0	0	0	0	0.89	0.19	0.53	0.16	0.4	0.14	0.07	0.18	0.31	0.11	0.32	0.14	0.33	0.27	0.16	0.03	0.06
ENSMMUG00000006511	0.02	0.03	0.02	0	0.02	0.03	0	0.02	0.02	0.2	0.24	0.04	0.03	0.11	0.1	0.06	0.03	0	0.1	0.01	0	0.04	0.07	0.01	0.03	0.01	0.06	0.01	0.01	0.06	0	0.36	0.16	0.12	0.08	0.05	0.07	0.12	0.45	0.71	0.27	0.02	0.07	0.02	0	0.25	0.04	0.01	0.12
ENSMMUG00000006517	0.03	0.01	0.07	0.07	0.05	0.11	0.07	0.07	0.05	0.02	0.07	0.06	0.04	0	0.03	0.02	0.03	0.09	0.08	0.06	0.09	0.03	0	0.1	0.18	0.22	0.03	0.07	0	0.03	0.05	0	0.04	0.15	0.09	0.08	0.06	0.04	0.21	0.01	0.26	0.11	0.38	0.1	0.1	0.08	0.04	0.09	0.1
ENSMMUG00000006532	12.44	14.57	10.37	19.36	14.32	12.91	10.6	16.22	2.46	2.66	2.1	2.27	1.3	2.58	3.22	2.91	1.82	2.49	2.39	2.83	1.37	2.37	2.7	2.07	5.82	4.68	9.64	14.73	10.64	12.27	11.15	13.68	21.33	15.38	11.57	16.07	11.77	14.83	14.24	13.49	1.41	1.49	1.26	3.05	0.94	2.38	3.56	2.52	3.14
ENSMMUG00000006534	0	0	0.03	0	0.02	0	0	0	0	0	0	0	0	0	0	0.03	0	0.1	0.07	0	0.3	0.06	0	0.04	0	0	0.09	0	0	0.07	0.07	0	0.03	0	0.05	0.12	0.06	0	0.03	0.03	0	0.02	0.04	0	0	0.02	0	0.02	0
ENSMMUG00000006537	0.07	0.05	0.08	0.06	0.05	0.03	0.04	0.08	0.12	0.07	0.1	0.28	0.11	0.06	0.02	0.15	0.37	0.17	0.15	0.15	0.02	0.28	0.35	0.19	0.07	0.41	0.2	0.24	0	0.15	0	0.08	8.14	6.69	5.7	4.14	5.51	4.89	3.77	5.89	13.49	18.57	15.86	14.93	14.01	18.52	11.27	15.89	5.42
ENSMMUG00000006538	0.1	0.19	0.21	0.15	0.04	0.06	0.08	0.02	0.05	0.12	0.23	0.12	0.05	0.08	0.19	0.08	0.02	0.13	0.06	0.12	0.02	0.04	0	0.03	0.17	0.09	0.15	0.07	0.07	0.03	0.22	0.04	0.25	0.19	0.31	0.12	0.11	0.05	0.12	0.07	0.27	0.06	0.12	0.27	0.45	0.11	0.38	0.06	0.5
ENSMMUG00000006543	0.09	0.01	0.24	0.07	0.03	0.03	0.06	0.06	0.05	0.11	0.07	0.05	0.05	0.08	0.03	0.02	0.01	0.07	0.12	0.13	0.08	0.06	0	0.06	0.04	0	0.11	0	0.07	0.02	0.02	0.11	0.06	0.07	0.1	0.09	0.06	0.03	0.01	0.04	0.08	0.08	0.06	0.04	0.02	0.11	0.1	0.02	0.13
ENSMMUG00000006547	0.01	0.03	0.03	0.04	0.07	0.01	0.03	0.03	0.03	0.03	0.02	0.04	0.01	0.03	0.02	0.01	0.01	0.02	0.02	0	0	0	0.01	0	0.04	0.03	0.02	0.01	0.03	0.13	0.02	0	0.05	0.08	0.05	0.01	0.02	0.03	0.04	0	0.01	0.01	0.03	0.02	0.02	0.02	0.02	0.02	0.05
ENSMMUG00000006549	0.26	0.27	0.34	0.42	0.43	0.54	0.26	0.28	0.3	0.16	0.31	0.28	0.09	0.08	0.22	0.32	0.13	0.11	0.12	0.06	0.12	0.06	0.08	0.2	0.07	0.29	0.06	0.1	0.13	0.12	0.12	0.17	0.86	0.95	0.77	0.95	0.63	0.38	0.3	0.29	1.46	1.32	1.02	0.76	0.81	0.63	1.26	0.41	2.4
ENSMMUG00000006551	0.11	0.03	0	0.02	0.03	0.07	0	0.02	0.02	0.02	0.03	0	0.06	0	0.02	0.16	0.15	0	0	0	0	0	0.21	0	0.02	0	0	0.06	0.08	0.06	0.04	0.03	2.34	2.39	1.2	1.75	4	1.55	3.39	2.55	1.67	1.91	1.04	1.35	1.64	1.15	1.96	1.35	1.04
ENSMMUG00000006555	0	0.02	0.01	0	0.02	0.01	0.01	0.02	0	0	0	0.03	0	0.02	0	0.02	0.04	0.04	0	0	0	0	0	0	0	0	0	0.02	0	0	0	0	0.04	0.01	0.01	0	0	0.03	0.02	0.06	0	0	0	0	0	0	0	0	0
ENSMMUG00000006559	0	0.16	0.19	0.16	0.06	0	0	0	0.22	0.24	0.26	0.25	0.98	0.12	0.12	0.18	0.17	0.51	0.17	0.21	0.42	0.12	0.25	0.16	0.45	0.15	0.14	0.2	0.13	0.27	0.18	0	0.1	0.16	0.12	0.2	0.13	0.16	0.36	0.05	0.28	0.09	0.33	0.23	0.56	0.37	0.22	0.28	0.01
ENSMMUG00000006575	0.01	0.02	0.02	0.07	0.01	0.03	0.05	0.03	0.03	0	0	0.02	0.07	0.07	0.03	0.02	0	0.06	0.01	0.04	0.15	0.01	0.08	0.07	0.04	0	0	0	0	0	0.04	0	0.07	0.01	0	0	0	0.02	0.03	0.02	0.08	0.06	0	0	0.04	0	0	0.02	0
ENSMMUG00000006580	0	0.06	0	0.01	0.01	0.03	0	0.04	0	0	0	0.05	0	0	0	0	0	0	0	0	0	0	0	0.18	0.02	0.04	0.05	0	0.02	0.1	0	0	0	0	0	0	0.1	0.02	0	0	0.03	0	0	0	0	0	0	0	0
ENSMMUG00000006583	0.28	0.21	0.12	0.34	0.09	0	0.04	0.19	0.29	0	0	0.23	0.14	0.19	0	0	0.18	0.04	0	0.08	0	0	0.09	0	0.23	0.36	0	0	0	0	0	0.09	2.8	1.67	1.09	1.46	1.2	2.94	2.52	1.34	3.36	3.91	2.52	2.11	2.79	2.15	1.84	2.54	1.86
ENSMMUG00000006587	0	0.03	0.54	0.09	0.45	0.47	0.12	0.19	0.04	0.08	0.44	0.8	0.6	1.27	0.22	0.33	0.06	0.12	0.43	0.46	0.48	2.23	0.8	0.24	0.08	0.16	0.46	0.32	0.28	0.97	0.25	0.37	0.16	0	0.44	0.43	0.54	0.95	0.2	0.05	0	0.06	0.12	0.28	0.46	0.43	0.11	0.15	0.08
ENSMMUG00000006589	0.01	0.02	0.03	0.03	0.05	0.04	0.06	0.04	0.02	0.02	0.03	0.05	0.04	0.04	0.02	0.09	0	0.01	0.02	0.06	0.05	0.02	0	0.04	0.03	0.02	0.03	0.01	0.04	0.01	0.08	0.03	0.07	0.06	0.04	0.08	0.1	0.04	0.03	0.07	0.02	0.05	0.09	0.14	0.09	0.03	0.1	0.1	0.03
ENSMMUG00000006590	0.01	0.01	0.01	0.01	0.02	0.01	0.05	0.01	0.03	0.03	0.03	0	0.02	0.03	0.02	0.01	0.01	0.03	0.01	0.01	0	0.01	0.03	0.03	0.01	0.03	0.03	0	0.02	0	0	0.07	0.06	0.04	0.05	0.03	0.04	0.05	0.01	0.04	0.03	0.08	0.01	0.01	0	0.09	0.02	0	0.14
ENSMMUG00000006597	0	0	0	0	0	0	0	0	0	0	0	0	0	0	0	0	0	0	0	0	0	0	0	0	0	0	0	0	0	0	0	0	1.15	0.81	1.13	0.98	0.58	1.38	0.33	2.08	0.41	0.69	0.38	0.37	1.26	0.4	1.18	0.82	0.89
ENSMMUG00000006609	0.26	0.13	0.26	0.27	0.33	0.45	0.23	0.26	0.12	0.17	0.17	0.25	0.09	0.27	0.36	0.13	0.24	0.18	0.24	0.07	0.33	0.34	0.4	0.26	0.16	0.07	0.22	0.3	0.21	0.25	0.34	0.03	0.58	0.4	0.86	1.37	0.77	2.03	1.39	0.54	0.09	0.15	0.33	0.28	0.53	0.95	0.44	0.21	0.27
ENSMMUG00000006611	0	0.05	0.01	0.04	0.05	0.12	0.01	0.09	0.03	0.08	0.09	0.04	0.14	0.05	0.06	0.11	0	0.06	0.1	0.1	0.11	0.03	0.13	0.15	0.02	0.06	0.05	0	0	0.23	0.03	0.06	0.07	0.06	0.11	0.04	0	0.03	0.01	0	0.07	0.07	0.16	0.11	0.01	0.16	0.04	0.04	0
ENSMMUG00000006627	2.29	3.06	2.82	3.41	2.93	4.09	2.57	3.62	0.33	0.66	0.28	0.26	0.35	0.48	0.26	0.35	0.46	0.27	0.36	0.31	0.18	0.22	0.25	0.18	0.44	0.64	0.64	1.12	1.21	0.84	1.1	1.03	0.3	0.36	0.21	0.2	0.11	0.17	0.14	0.29	3.35	4.65	1.79	2.33	1.27	2.26	1.63	2.23	3.03
ENSMMUG00000006631	0.06	0	0.04	0.03	0.01	0.07	0.01	0	0	0.06	0	0	0	0.06	0.06	0	0.11	0.05	0.05	0.06	0.09	0.1	0.03	0.1	0.09	0.21	0	0	0	0	0.08	0.03	0	0.02	0	0.04	0	0.04	0.02	0	0.07	0	0.15	0.07	0.03	0.1	0.03	0.03	0
ENSMMUG00000006634	0.17	0.12	0.22	0.2	0.2	0.13	0.21	0.16	0.54	0.26	0.29	0.51	0.64	0.46	0.75	0.53	0.27	0.42	0.21	0.69	0.41	0.51	0.25	0.52	0.17	0.35	0.18	0.28	0.2	0.1	0.16	0.05	0.24	0.07	0.09	0.45	0.46	0.1	0	0.06	0.71	0.46	0.4	0.19	0.11	0.51	0.37	0.29	0.32
ENSMMUG00000006635	0.02	0.03	0.03	0.01	0.02	0.03	0.06	0.01	0.02	0.02	0.06	0.01	0.06	0	0.04	0.02	0.03	0.03	0.02	0.03	0.03	0.02	0.02	0.02	0.03	0.05	0.04	0.02	0.03	0.05	0.06	0.01	0.03	0.02	0.01	0.03	0.05	0.03	0	0.01	0.02	0.02	0.01	0.02	0.03	0.02	0.01	0	0.11
ENSMMUG00000006651	0	0	0	0	0	0	0	0	0	0	0.02	0	0.02	0	0	0	0.03	0.01	0	0.01	0	0	0.13	0	0	0	0	0	0	0	0.03	0	0.25	0.03	0	0.04	0.1	0	0.25	0.02	0.24	0.11	0.23	0.18	0.16	0.16	0.12	0.33	0.32
ENSMMUG00000006655	2.07	2.5	4.25	3	2.49	2.69	5.1	4.67	0.5	0.4	1.57	1.1	1.87	2.71	1.62	1.7	1.11	1.28	2.71	1.48	2.65	3.66	5.57	4.2	5.91	5.88	10.94	9.8	9.93	16.76	9.85	11.63	2.02	1.86	2.37	2.57	3.6	4.22	3.76	3.83	1.76	1.65	3.79	5.99	4.01	4.44	6.75	6.09	0.74
ENSMMUG00000006656	0.12	0.04	0.07	0.11	0.07	0.08	0.04	0.08	0	0.05	0.07	0	0	0	0.11	0	0.04	0.04	0.08	0.04	0	0.04	0.22	0.08	0.05	0.1	0.19	0	0	0.21	0	0	0.79	1.27	0.59	1.28	2.03	3.47	0.96	2.06	0.3	0.44	0.37	0.81	1.12	1.24	1.63	0.82	0.39
ENSMMUG00000006659	0.11	0.07	0.24	0.17	0.19	0.14	0.27	0.13	0.25	0.53	0.75	0.78	0.76	0.81	0.76	0.56	0.3	0.23	0.59	0.99	0.53	0.44	0.47	0.27	0.18	0.13	0.24	0.1	0.11	0.23	0.25	0.19	0.58	0.95	2.45	1.94	1.89	1.93	4.15	2.22	0.36	0.37	0.75	0.51	0.68	0.54	0.91	0.63	0.48
ENSMMUG00000006662	0.05	0.1	0.08	0.08	0.05	0.07	0.04	0.04	0.45	0.58	0.19	0.35	0.37	0.42	0.24	0.31	0.22	0.26	0.31	0.35	0.16	0.12	0.1	0.09	0.14	0.29	0.2	0.07	0.11	0.18	0.2	0.11	0.11	0.2	0.16	0.07	0.04	0.15	0.11	0.11	1.85	1.87	0.73	0.76	0.47	0.28	0.49	0.49	1.32
ENSMMUG00000006664	53.54	45.4	77.39	91.97	100.31	97.83	52.38	65.61	57.26	58.58	37.17	30.25	21.16	17.88	19.32	19.45	28.6	28.61	23.15	29.37	14.35	10.52	9.53	8.63	21.49	22.87	36.2	38.18	36.23	28.17	42.97	29.46	147.51	171.56	205.05	130.59	128.59	98.96	126.46	115.71	31.96	43.1	15.56	10.94	11.42	8.35	7.15	8.18	67.94
ENSMMUG00000006665	0.98	1.15	1.62	1.46	0.85	0.97	1.09	1.43	1.01	0.63	0.87	0.92	0.18	0.16	0.19	0.59	0.43	0.8	1.18	0.93	0.18	0.09	0.1	0.3	0.23	0.46	1.3	1.19	1.15	0.7	0.7	1.17	0.05	0.05	0.09	0.15	0.08	0.06	0.08	0.02	0.57	0.82	1.62	0.95	0.39	0.36	0.41	1.1	0.63
ENSMMUG00000006672	0.01	0	0.03	0	0	0	0	0.02	0.01	0	0	0.01	0.03	0.03	0.01	0.01	0.01	0	0	0	0	0.09	0.01	0.02	0.05	0	0.03	0	0.01	0.03	0.03	0	0.08	0.01	0.03	0.03	0.01	0.01	0.01	0.02	0	0.01	0.02	0	0.04	0.04	0.01	0.01	0.02
ENSMMUG00000006673	0.11	0.1	0.07	0.14	0.04	0.08	0.18	0.13	0.32	0.25	0.35	0.36	0.25	0.31	0.6	0.81	0.29	0.25	0.25	0.35	0.09	0.47	0.54	0.26	0.37	0.22	0.14	0.16	0.12	0.17	0.28	0.22	0.09	0.03	0.04	0.13	0.07	0.07	0.47	0.12	0.62	0.39	0.81	0.38	0.39	0.95	1.1	0.81	0.22
ENSMMUG00000006674	0.15	0.32	0.27	0.05	0.79	0.68	0.24	0.2	0.06	0.07	0.26	0.17	0.31	0.42	0.21	0.3	0.1	0	0.15	0.13	0.16	0.31	0.14	0.05	0.44	0	0.57	0.08	0.07	0.36	0.1	0	1.04	0.53	0.68	0.2	0.68	0.22	0.95	0.61	0.33	0.33	0.44	0.22	0.26	0.36	0.18	0.35	0.07
ENSMMUG00000006678	0.22	0.18	0.62	0.37	0.21	0.17	0.13	0.06	0.3	0.47	0.36	0.34	0.56	0.43	0.38	0.17	0.5	0.22	0.7	0.74	0.49	0.39	0.15	0.08	0.65	0.41	0.29	0.41	0.38	0.32	0.31	0.15	0.18	0.11	0.4	0.35	0.04	0.22	0.16	0.23	0.6	0.18	0.51	0.6	0.48	0.6	0.17	0.23	0.22
ENSMMUG00000006681	0.01	0.02	0	0	0	0	0.01	0.02	0.05	0.07	0	0	0	0.04	0	0.01	0.02	0	0	0.03	0	0.04	0	0	0	0.01	0	0	0	0	0.02	0	0.02	0	0.06	0	0	0	0.03	0	0.01	0	0.05	0	0	0	0	0	0
ENSMMUG00000006683	0	0.09	0.06	0.05	0.05	0.02	0.03	0.05	0.56	0.4	0.46	0.35	0.3	0.45	0.28	0.26	0.23	0.2	0.05	0.18	0.28	0.27	0.23	0.27	0.44	0.19	0.03	0.05	0.01	0.08	0.04	0.04	0.81	0.39	0.52	0.18	0.47	0.44	0.44	0.39	5.24	11.96	7.21	11.92	4.41	7.12	7.91	9.56	24.42
ENSMMUG00000006689	5.3	5.08	4.19	4.63	5.13	4.38	4.52	5.94	0.97	1.32	2.99	1.89	2.08	2.66	2.84	2.09	1.51	0.55	1.37	1.2	1.3	1.32	3.08	2.16	1.8	1.71	3.44	4.66	8.27	3.92	4.94	6.39	0.45	0.6	0.59	0.55	0.54	0.63	0.69	0.36	6.29	7.32	8.6	6.7	9.08	8.61	12.59	10.15	5.18
ENSMMUG00000006691	0	0.02	0	0.02	0.09	0	0	0	0.01	0.03	0	0	0	0	0.03	0	0	0.07	0	0.02	0	0	0	0.09	0	0.04	0	0.12	0.09	0.04	0	0.16	0.04	0.03	0	0	0	0	0.04	0	0	0	0	0.03	0.02	0	0.27	0	0
ENSMMUG00000006693	0	0	0	0	0	0	0	0	0	0	0	0	0	0	0	0	0	0	0	0	0	0	0	0	0	0	0	0	0	0	0	0	1.82	2.58	0.94	1.39	2.15	2.81	1.81	1.32	0.56	1.39	0.67	0.62	0.2	1.25	0.82	1.07	1.21
ENSMMUG00000006696	2.59	3.79	2.58	2.22	4.03	2.52	2.82	4.32	5.55	2.3	2.41	2.05	3.14	2.21	1.76	2.65	1.86	3.62	2.92	2.33	3.05	1.99	2.6	2.87	3.43	3.43	4.45	2.51	4.59	3.56	3.39	4.6	0.61	0.98	1.11	0.92	1.15	0.48	0.99	1.42	2.33	3.68	3.82	2.57	3.74	2.55	3.96	4.04	1.42
ENSMMUG00000006697	0.02	0	0	0.01	0.01	0.02	0.02	0.03	0.01	0.02	0.01	0	0	0.05	0	0	0.01	0	0	0.01	0.02	0.02	0.06	0	0	0	0.01	0	0.04	0.07	0	0	0.09	0.05	0.05	0.05	0.08	0.04	0.06	0	0.04	0.01	0	0.01	0	0.2	0.08	0.02	0.05
ENSMMUG00000006698	0.01	0.01	0.07	0.01	0.02	0.01	0	0.04	0.02	0.02	0.02	0	0.06	0.01	0.02	0.01	0.03	0.04	0.01	0	0.04	0.05	0.01	0	0.02	0.02	0	0	0	0.05	0.03	0.03	0	0.04	0.05	0.03	0.02	0	0.05	0.06	0.04	0	0.01	0.01	0.01	0	0.02	0.01	0.08
ENSMMUG00000006704	0.2	0.03	0.07	0.01	0.03	0.06	0	0.05	0.02	0.06	0.05	0.07	0.01	0	0.02	0	0.09	0.05	0	0.05	0.02	0.02	0.01	0.02	0.03	0.04	0.01	0.16	0.08	0.03	0.18	0.03	0.06	0.05	0.07	0	0	0.09	0.02	0.02	0.06	0.01	0.05	0.04	0.02	0.12	0.18	0	0.03
ENSMMUG00000006706	0.67	0.63	0.4	0.55	0.85	0.56	1.2	1.18	0.48	0.23	0.58	0.8	0.68	0.67	0.81	0.45	0.22	0.47	0.91	0.77	0.68	1.16	0.56	0.35	0.45	0.91	1.28	1.17	0.6	2.45	0.9	2.06	2.61	1.65	2.41	2.56	2.86	2.43	2.46	2.34	3.16	2.88	2.74	2.9	3.15	3.65	5.61	4.08	2.99
ENSMMUG00000006709	0.05	0.13	0.07	0.06	0.18	0.18	0.15	0.04	0.09	0.06	0.09	0.08	0.01	0.02	0.15	0.08	0.03	0.06	0.13	0.13	0.13	0.18	0.26	0.14	0.07	0.19	0.07	0.02	0.2	0	0.07	0.02	0.23	0.21	0.13	0.17	0.24	0.13	0.2	0.21	0.1	0.06	0.13	0.12	0.15	0.12	0.16	0.17	0.07
ENSMMUG00000006710	0.13	0.16	0.08	0.24	0.09	0.09	0.05	0.18	0.38	0.28	0.26	0.18	0.28	0.22	0.23	0.11	0.07	0.15	0.3	0.25	0.03	0.12	0.13	0.12	0.11	0.05	0.29	0.59	0.3	0	0.06	0.18	23.4	11.94	38.51	20.05	28.27	25.54	25.9	22.49	44.16	46.02	32.13	26.33	25.03	28.29	17.3	18.49	29.77
ENSMMUG00000006711	0	0.01	0.02	0.01	0.01	0.01	0	0.01	0.01	0.01	0	0.05	0.01	0.04	0.03	0	0.02	0	0.02	0.02	0	0.01	0	0	0	0.07	0.03	0	0.03	0.03	0.06	0	0.79	0.88	0.47	0.88	1.15	1.12	1.47	1.98	0.08	0.13	0.14	0.08	0.25	0.22	0.13	0.25	0.22
ENSMMUG00000006715	0.05	0.11	0.1	0.05	0.11	0.11	0.06	0.05	0.39	0.25	0.19	0.1	0.41	0.18	0.18	0.11	0.19	0.13	0.19	0.08	0.27	0.09	0.23	0.06	0.09	0.16	0.12	0.19	0	0.22	0.06	0.03	0.2	0.14	0.18	0.08	0.25	0.1	0.09	0.18	0	0.16	0.2	0.15	0.16	0	0.18	0.15	0.16
ENSMMUG00000006723	0.44	0.14	0.25	0.18	0.28	0.32	0.46	0.54	0.14	0.38	0.22	0.19	0.09	0.42	0.19	0.21	0.27	0.04	0.44	0.48	0.29	0.41	0.38	0.51	0.11	0.22	0.18	0.24	0.8	1.14	0.51	0.72	1.93	1.54	1.58	2.39	1.34	3.46	2.24	2.65	0.9	0.84	0.79	1.19	1.13	0.73	1.13	0.68	1.11
ENSMMUG00000006724	0	0.06	0.06	0.08	0	0.04	0.06	0	0.05	0.08	0.18	0.14	0	0.04	0.03	0	0.16	0.02	0	0.17	0.07	0	0	0	0.11	0	0	0.04	0.03	0	0.04	0	0.04	0.28	0.13	0.17	0	0.16	0.15	0.13	0.03	0.07	0.04	0.07	0.23	0.24	0.03	0.12	0
ENSMMUG00000006725	0.42	0.57	0.63	0.33	0.31	0.28	0.29	0.13	0.88	1.17	0.77	0.98	0.81	0.59	0.59	0.36	1.06	1.28	0.66	0.9	0.96	0.54	0.43	0.42	0.88	0.67	0.58	0.43	0.38	0.44	0.47	0.47	0.3	0.31	0.2	0.11	0.4	0.24	0.15	0.23	1.34	1.01	0.87	0.78	1.02	0.93	0.54	0.5	1.24
ENSMMUG00000006726	0.56	0.23	0.26	0.6	0.37	0.73	0.44	0.64	0.3	0.52	0.17	0.26	0.31	0.69	0.56	0.27	0.49	0.35	0.15	0.33	0.41	0.47	0.49	0.59	0.64	0.29	0.16	0.4	0.18	0.68	0.37	0.47	7	3.02	1.91	3.17	3.38	7.06	3.86	4.05	2.54	1.23	0.94	1.56	1.22	2.93	1.35	1.62	2.37
ENSMMUG00000006727	0.1	0.16	0.07	0.17	0.01	0.08	0.09	0.09	0.03	0	0.02	0.02	0.09	0.14	0.13	0.07	0.03	0.04	0.04	0	0.04	0.06	0.06	0.04	0	0.02	0.15	0.08	0.11	0.06	0.08	0.03	0.12	0.08	0.06	0.03	0.06	0.02	0.03	0.01	0.07	0.05	0.21	0.09	0.15	0.25	0.24	0.07	0.06
ENSMMUG00000006732	0.06	0.23	0.34	0.14	0.16	0.25	0.11	0.24	1.09	0.86	1.82	1.4	1.92	1.51	1.54	1.95	0.46	0.6	1.65	1.13	1.42	1.53	1.02	1.01	0.68	0.51	0.28	0.55	0.37	0.46	0.71	0.46	11.63	7.73	24.15	16.95	27.82	30.49	39.48	31.06	63.4	74.08	73.12	64.03	56.17	104.38	58.13	61.91	27.24
ENSMMUG00000006749	0.43	0.58	0.77	0.46	0.49	0.39	0.42	0.4	1.07	0.95	1.17	1.06	1.27	1.48	0.64	0.66	1.35	0.92	1.15	1	1.04	1.1	0.92	0.82	1.1	0.99	1.01	0.97	0.96	0.97	0.93	0.68	0.7	0.74	0.77	0.9	0.73	1.04	0.66	0.82	4.71	3.61	5.14	3.55	4.22	5.29	2.5	4.29	2.42
ENSMMUG00000006750	0	0	0	0	0	0.01	0.01	0.01	0	0	0	0	0	0.02	0	0	0.04	0.05	0	0	0	0	0	0.01	0.01	0	0	0	0	0.04	0.02	0	0.06	0.03	0.03	0.01	0	0	0	0	0	0	0	0	0.01	0	0	0.01	0
ENSMMUG00000006756	0.56	1.04	0.75	0.76	0.52	0.4	0.63	0.69	0.31	0.22	0.7	0.36	0.63	0.49	0.54	1.02	0.36	0.58	0.38	0.43	1	0.56	0.83	1.16	0.76	0.9	2.3	1.45	1.48	1.91	1.11	2.68	0.2	0.1	0.36	0.3	0.55	0.15	0.3	0.24	0.37	0.68	0.75	0.72	1.19	0.36	0.79	0.9	0.24
ENSMMUG00000006765	0.04	0.02	0.4	0.05	0	0.03	0.02	0.1	0	0.05	0.24	0	0.27	0	0.17	0	0	0	0.45	0.05	0	0	0.19	0	0	0	0.14	0	0.08	0	0	0.07	0.03	0.02	0.13	0	0.15	0.03	0.11	0.11	0	0	0.28	0	0.04	0.12	0	0.04	0
ENSMMUG00000006768	0.02	0.04	0.01	0.02	0.01	0.02	0	0.02	0.1	0	0.01	0.01	0.02	0	0.07	0	0.02	0.04	0	0	0.03	0.01	0.03	0	0.04	0.01	0	0.03	0	0	0.02	0.05	0.01	0.04	0.03	0.07	0.01	0.06	0.03	0.07	0.01	0.01	0.04	0.03	0.03	0.07	0.06	0	0.41
ENSMMUG00000006773	2.41	2.27	3.22	2.53	1.75	2.18	1.47	1.98	2.94	5.56	5.92	4.4	9	5.76	5.39	5.63	3.14	3.09	5	4.42	5.67	3.9	4.76	6.66	3.24	4.11	30.19	16.84	13.27	7.51	8.43	6.57	21.99	13.96	14.85	12.63	6.36	7.92	7.03	8.4	3.62	3.26	4.62	3.89	5.22	4.03	5.25	5.07	3.33
ENSMMUG00000006775	21.98	16.35	13.26	30.97	12.23	14.14	17.01	21.85	27.41	34.69	32.51	25.35	17.08	17.22	23.96	16.69	20.06	18.2	19	28.66	19.73	13.49	22.02	11.35	17.99	20.93	10.28	12.17	5.11	6.98	11.98	5.58	5.84	12.46	11.59	31.7	21.84	19.88	27.9	39.54	52.31	56.2	34.23	29.28	28.93	26.67	24.41	20.33	37.4
ENSMMUG00000006778	0.84	0.76	0.78	0.58	0.7	0.83	0.68	0.83	0.56	0.54	0.51	0.7	0.59	0.57	0.62	0.63	0.29	0.28	0.63	0.82	0.43	0.35	0.39	0.52	0.94	0.88	0.86	0.9	0.6	0.58	0.89	0.65	0.99	0.73	1.36	0.94	1.02	0.91	0.92	1.33	0.71	0.77	1.04	0.95	1.05	0.74	0.8	0.79	0.99
ENSMMUG00000006779	1.08	1.23	3.48	0.43	0.37	0.36	0.67	0.71	0.98	0.74	0.4	0.33	0.53	0.47	0.54	0.46	0.47	0.27	0.41	0.32	0.26	0.22	0.42	0.41	2.29	2.24	1.5	1.55	2.57	1.64	3.65	2.45	0.09	0.11	0.14	0.07	0.11	0.05	0.14	0.15	3.16	5.55	5.6	6.13	3.85	5.31	5.62	6.39	9.01
ENSMMUG00000006780	1.51	1.12	2.67	1.43	0.77	0.96	0.82	1.12	5.76	6.09	5.1	4.94	4.98	4.01	4.15	4.41	3.81	2.88	4.25	4.66	3.07	2.84	2.76	2.5	2.76	2.07	1.33	1.71	1.68	1.33	1.53	1.04	70.35	64.92	86.85	72.16	49.34	51.57	50.56	40.69	36.23	43.09	27.14	30.43	22.97	23.54	21.02	20.01	27.78
ENSMMUG00000006781	0.99	0.96	0.23	0.27	0.12	0.14	0.09	0.16	0.16	0.33	0.57	0.47	0.44	0.46	0.84	0.8	0.13	0.41	0.62	0.63	0.95	0.52	0.89	0.43	0.24	0.29	0.55	0.29	0.4	0.35	0.41	0.62	0.3	0.05	0	0.04	0.05	0.09	0.09	0.09	0.41	0.4	0.54	0.61	1.47	0.79	0.9	1	1.21
ENSMMUG00000006786	0.03	0.04	0.03	0.03	0.04	0.03	0.04	0.02	0.05	0.02	0.01	0.02	0.02	0.05	0.02	0.03	0.04	0.05	0.07	0.04	0.04	0.03	0.03	0.05	0.04	0.04	0.04	0.03	0	0	0.05	0.02	0.39	0.79	0.81	0.59	0.47	1.29	0.5	0.5	0.08	0.06	0.09	0.06	0.06	0.06	0.08	0.06	0.08
ENSMMUG00000006789	0.05	0.03	0	0	0.07	0.09	0	0.03	0.06	0.02	0.03	0.11	0	0.03	0.02	0.05	0	0.02	0.11	0	0	0.1	0	0.02	0.02	0	0	0.03	0	0	0.03	0	0.03	0.07	0.06	0.04	0.03	0	0.08	0.02	0	0.01	0	0	0	0.02	0	0.04	0
ENSMMUG00000006793	0.09	0	0.04	0.03	0.07	0.12	0.01	0.03	0.01	0	0.05	0	0.02	0.08	0.03	0.04	0.01	0.07	0.06	0.01	0.04	0.02	0	0.03	0.04	0	0.05	0.02	0	0.05	0.04	0	0.05	0.12	0.09	0.04	0.02	0.03	0.02	0.02	0	0.02	0.03	0	0	0.03	0.09	0.01	0.03
ENSMMUG00000006795	0.25	0.43	0.29	0.14	0.2	0.38	0.28	0.16	0.09	0.14	0.57	0.34	0.31	0.56	0.53	0.4	0.14	0.21	0.19	0.21	0.17	0.33	0.25	0.26	0.11	0.13	0.2	0.17	0.15	0.48	0.17	0.26	0.03	0.14	0.42	0.24	0.35	0.1	0.21	0.08	0.17	0.13	0.43	0.22	0.17	0.25	0.34	0.28	0.09
ENSMMUG00000006796	1.32	1.2	2.95	1.54	2.28	4.07	2.33	2.11	1.32	0.89	3.15	1.59	2.06	2.49	3.05	2.47	0.65	0.95	2.95	1.72	1.09	2.11	2.81	3.07	0.62	0.94	1.37	1.14	0.78	1.81	2.22	1.37	0.33	0.37	0.77	0.5	0.57	0.81	0.72	0.82	0.95	0.59	1.01	1.32	1.69	2.27	3.71	1.58	1.42
ENSMMUG00000006799	0.01	0.01	0.01	0.02	0.04	0.02	0.01	0	0.02	0.02	0	0	0	0.01	0	0	0.02	0.02	0.01	0.04	0.01	0.01	0	0.03	0.04	0.05	0.05	0.03	0.01	0.01	0	0.02	0	0.02	0.05	0.04	0.06	0.01	0.04	0.04	0.02	0.01	0	0.08	0.01	0.01	0.01	0	0.01
ENSMMUG00000006808	0.05	0.01	0.07	0.06	0.07	0.01	0.03	0.05	0.08	0.07	0.06	0.07	0.08	0.04	0.07	0.06	0.03	0.06	0.05	0.08	0.02	0	0.02	0.04	0.06	0.02	0.15	0.15	0.09	0.24	0.02	0.1	0.2	0.22	0.09	0.45	0.22	0.31	0.3	0.31	0.04	0.07	0.04	0.13	0.1	0.04	0.26	0.11	0.06
ENSMMUG00000006817	0.08	0	0.04	0	0	0.1	0.02	0.04	0	0.14	0.04	0.1	0	0.26	0	0.06	0.02	0.02	0.02	0	0	0	0.02	0	0.03	0.13	0.07	0	0	0	0.08	0.08	0.23	0.15	0.43	0.12	0	0.18	0	0.17	0	0	0.14	0	0	0	0.19	0	0.08
ENSMMUG00000006819	0.51	0.45	0.43	0.47	0.54	0.52	0.38	0.74	0.4	0.32	0.12	0.22	0.29	0.05	0.19	0.36	0.24	0.38	0.33	0.32	0.1	0.11	0.31	0.16	0.37	0.51	0.28	0.29	0.36	0.31	0.51	0.29	0.47	0.53	0.3	0.45	0.42	0.16	0.29	0.46	0.67	0.71	0.36	0.52	0.63	0.43	0.47	0.54	0.63
ENSMMUG00000006820	0	0.01	0.01	0.01	0.01	0	0	0	0.01	0.01	0	0.01	0	0	0.01	0.01	0	0.01	0.01	0	0.01	0	0	0	0.02	0.01	0.01	0	0.02	0.02	0	0	0.01	0.02	0.02	0.01	0.02	0.01	0.01	0.01	0.02	0.01	0.02	0.01	0.01	0.02	0	0	0.01
[truncated: 5,441 more rows]
[truncated: 17 more columns]
