# Supplementary material for: Annotation and cluster analysis of spatiotemporal- and sex-related lncRNA expression in rhesus macaque brain
Source: HighWire-hosted journal article supplement (doi:10.1101/gr.217463.116), 2017-07-07
Supplement: Supplemental_Material.tar.gz [file All_DELnc_WGCNA_modules.xlsx]

## Sheet: All_DELnc_WGCNA_modules
LncRNA	CE_01F	CE_01M	CE_04F	CE_04M	CE_10F	CE_10M	CE_20F	CE_20M	DG_01F	DG_01M	DG_04F	DG_04M	DG_10F	DG_10M	DG_20F	DG_20M	FL_01F	FL_01M	FL_04F	FL_04M	FL_10F	FL_10M	FL_20F	FL_20M	FMC_01F	FMC_01M	FMC_04F	FMC_04M	FMC_10F	FMC_10M	FMC_20F	FMC_20M	HI_01F	HI_01M	HI_04F	HI_04M	HI_10F	HI_10M	HI_20F	HI_20M	OL_01F	OL_01M	OL_04F	OL_04M	OL_10F	OL_10M	OL_20F	OL_20M	PL_01F
XLOC_000003	1.2	0.81	0.74	1.58	1.24	2.42	2.84	1.01	0.3	0.75	0.48	0.42	1.02	0.71	0.7	0.46	1.19	0.44	1.16	0.78	0.21	1.11	0.91	1.18	0.58	0.53	0.19	0.36	0.79	0.99	1.41	0.49	0.21	0.38	0.32	0.34	0.05	0	0.73	0.26	0.85	0.25	1.41	0.9	0.78	0.45	0.66	1.79	0.65
XLOC_000007	0.46	0.74	0.5	1.14	1.25	0.92	0.77	1.45	0.96	0.82	0.69	0.99	0.76	0.18	0.56	0.4	0.62	0.36	0.23	0.28	0.84	0.04	0.5	0.39	0.4	0.17	0.06	0.33	0.16	0.03	0.22	0.28	0.35	0.81	0.51	0.99	0.27	0.12	0.33	1.17	0.19	0.46	0.27	0.74	0.09	0.12	0.18	0.51	0.33
XLOC_000011	0	0	0	0.07	0	0	0	0	0.05	0	0	0	0.07	0	0	0.03	0	0	0	0	0	0	0.04	0	0	0.07	0.56	0	0	0	0	0	0	0.03	0	0	0	0	0	0	0	0.07	0	0	0	0	0.03	0	0
XLOC_000012	0.85	0.66	0.85	1.13	0.85	0.32	0.89	0.29	0.95	0.79	1.01	0.92	0.41	0.2	0.59	0.48	1.19	1.01	1.31	1.37	1.63	1.15	2.36	1.55	1.03	0.53	1.41	0.98	0.96	0.91	1.8	0.46	1.13	0.5	0.84	2.01	1.03	0.85	1.41	0.78	0.19	0.32	0.21	0.42	0.28	0.14	0.83	0.19	0.46
XLOC_000013	0.87	0.76	0.42	1.84	1.03	1.42	0.65	0.71	0.05	0.01	0.02	0.15	0.04	0.09	0.08	0.17	0.04	0.04	0.21	0.23	0.26	0.17	0.1	0.48	0.04	0.05	0.11	0.13	0.12	0.17	0.14	0.24	0.2	0.06	0.27	0.51	0.19	0.17	0.13	0.34	0.21	0.14	0.26	0.84	0.27	0.44	0.16	0.36	0.05
XLOC_000017	3.74	5.43	3.87	4.57	6.12	2.05	3.42	5.52	0.02	0.01	0.02	0.03	0	0	0.01	0.01	0.09	0.02	0.03	0.02	0.07	0.02	0.02	0.06	0.11	0.05	0.06	0.01	0.04	0.06	0.06	0.04	0.03	0.07	0	0.03	0	0	0.01	0.01	0.07	0.08	0.13	0.11	0.13	0.05	0.05	0.14	0.07
XLOC_000022	0.02	0.04	0.08	0.08	0.09	0	0	0.04	0.72	0.5	0.3	0.99	3.13	1.48	2.03	2.39	0.28	0.04	0.18	0.19	0.04	0.06	0.18	0.1	0.13	0.1	0.03	0.12	0.03	0.02	0.01	0.17	0.15	0.45	0.3	0.16	0.43	0.13	0.78	0.85	0.04	0.04	0	0.05	0.03	0.06	0.04	0.02	0.05
XLOC_000025	0.01	0.01	0.02	0.02	0.01	0.01	0.02	0.03	0.3	0.28	0.28	0.57	2.65	1.19	1.44	1.9	0.08	0.07	0.05	0.03	0.05	0.01	0.03	0.05	0.08	0.08	0.02	0	0.08	0.01	0.02	0.05	0.13	0.19	0.06	0.1	0.27	0.1	0.45	0.37	0.03	0.06	0.01	0.04	0.01	0.01	0.07	0.01	0.07
XLOC_000026	0	0.05	0.03	0	0.03	0	0	0.05	0.25	0.66	0.6	0.89	2.58	1.42	0.9	1.62	0.09	0.04	0.01	0.05	0.04	0.07	0.02	0.09	0.04	0.11	0	0.01	0.03	0.03	0.04	0.07	0.14	0.25	0.14	0.16	0.49	0.21	0.47	0.66	0	0.06	0	0.06	0	0.04	0.09	0.07	0.05
XLOC_000028	0	0.08	0.03	0	0	0	0.11	0	0	0	0.06	0	0	0	0	0	0	0.03	0.08	0	0	0	0	0	0.02	0	0.09	0.02	0	0	0	0	0	0.09	0.22	0	0	0	0.18	0.04	0	0	0	0	0	0.29	0	0.05	0.04
XLOC_000038	0	0.08	0.03	0.14	0.02	0.16	0	0.02	0.04	0.05	0.11	0.17	0.05	0.01	0.25	0.13	0.1	0.14	0	0.13	0.14	0.14	0.02	0.12	0.13	0	0	0.11	0.01	0.08	0	0.08	0	0	0	0	0.02	0.16	0.05	0.03	0.1	0.11	0.08	0.09	0.13	0.01	0.06	0.06	0.15
XLOC_000041	0.23	0.13	0.19	0.03	0.11	0.16	0.03	0.27	0.04	0	0.02	0.1	0.04	0.04	0.06	0.04	0.05	0.06	0.04	0.04	0	0	0.03	0.19	0	0	0.02	0	0	0.05	0	0.05	0.05	0	0	0	0	0	0.09	0.6	0	0	0.13	0.02	0	0	0	0.2	0
XLOC_000043	0	0	0	0	0	0	0	0	0.24	0.04	0	0.15	0.04	0.08	0.53	0.08	0.05	0.48	0.14	0.07	0.12	0	0.16	0.47	0.73	0.04	0.5	0.14	0	0.08	0.33	0.04	0.55	0	0.13	0.54	0	0	0.16	0	0.53	0.75	0.19	0.45	0.41	0.41	0.23	0.14	0.31
XLOC_000044	0	0	0.01	0	0	0.05	0	0.02	0.22	0.62	0.29	0.2	0.1	0.09	0.3	0.27	0.06	0.05	0.09	0.05	0.02	0.11	0.11	0.03	0	0.02	0.02	0.07	0.02	0.05	0	0.15	0.26	0.3	1.22	0.61	0.71	0.85	0.99	0.68	0.05	0.04	0.02	0	0	0	0	0.04	0.04
XLOC_000048	0	0	0	0	0	0	0	0	0	0	0.12	0	0	0	0	0	0	0	0.16	0	0	0	0	0	0	0	0	0	0	0.14	0	0	0	0	0.15	0	0	0	0	0	0	0	0.26	0.08	0	0	0	0	0
XLOC_000049	0.07	0	0.11	0.06	0	0	0.07	0	0	0	0	0	0.08	0.13	0.12	0	0	0.06	0	0	0	0.09	0	0	0	0	0	0	0.55	0	0	0	0	0	0	0	0	0	0	0.08	0	0.04	0.08	0.07	0.48	0	0.05	0	0
XLOC_000050	0	0	0	0	0	0	0	0	0.03	0	0.05	0	0	0	0	0	0.22	0.12	0	0	0	0	0	0	0.53	0.06	0.15	0.03	0	0	0.06	0	0.08	0.15	0	0	0	0	0	0	0	0.2	0	0	0	0.06	0	0.35	0.18
XLOC_000052	2.35	2.63	1.7	1.38	1.38	1.38	0.76	1.94	0.21	0.25	0.21	0.06	0.03	0.05	0.04	0.12	0.4	0.2	0.26	0.14	0.15	0.14	0.13	0.25	0.2	0.23	0.25	0.06	0.19	0.21	0.1	0.19	0.24	0.38	0.27	0.2	0.06	0.17	0.09	0.15	0.17	0.3	0.28	0.18	0.21	0.31	0.15	0.26	0.14
XLOC_000054	0	0	0	0.11	0.14	0	0	0.03	0.1	0	0	0.04	0.06	0	0	0.12	0.02	0.11	0.21	0.3	0.25	0	0.03	0.06	0.19	0.27	0.29	0.25	0.45	0	0	0.15	0.15	0.03	0.03	0.07	0	0	0.08	0	0.13	0	0.14	0.12	0.96	0.06	0.07	0	0.31
XLOC_000057	0.26	1.82	0.23	0.3	0.4	0.44	0.39	0.5	0.16	0.56	0.21	0.21	0.21	0.28	0.22	0.24	0.57	0.05	0.14	0.08	0.2	0.22	0.15	0.15	0.13	0.56	0.25	0.23	0.33	0.35	0.25	0.22	0.2	0.67	0.46	0.17	0.18	0.44	0.31	0.4	0.19	0.93	0.21	0.16	0.28	0.25	0.25	0.22	0.19
XLOC_000059	0	0	0	0	0	0	0	0	0	0	0.51	0.04	0	0.09	0	0.19	0	0	0	0	0.15	0	0	0	0	0	0	0	0	0	0	0	0	0	0	0	0.07	0.17	0.66	0.55	0	0	0	0	0	0	0	0	0
XLOC_000060	0.15	0	0.05	0.12	0	0.38	0.07	0.06	0	0	0.04	0.04	0	0.08	0.04	0.08	0	0	0	0	0.07	0.18	0	0	0.49	0	0.12	0	0	0.13	0	0.04	0.53	0.05	0	0	0	0	0	0.17	0.65	0	0.04	0.04	0.13	0	0	0.1	0
XLOC_000065	0.42	0.26	0.66	0.12	1.01	0.4	0.57	0.96	0.08	0.01	0.05	0.02	0.08	0.04	0.05	0	0.01	0	0.11	0	0.17	0.04	0.01	0.16	0.02	0	0.03	0	0	0	0.24	0.08	0	0.04	0.05	0.07	0.08	0.04	0.11	0.08	0.04	0	0.26	0.04	0.11	0.14	0.14	0.42	0
XLOC_000069	0	0	0	0	0	0.06	0	0	0.04	0	0	0	0.04	0.04	0.08	0	0.05	0.05	0.21	0.07	0.12	0.17	0.22	0	0.08	0.19	0.15	0.04	0.21	0	0.18	0	0	0	0	0	0.06	0	0	0	0	0.04	0.46	0.03	0.4	0	0.42	0.14	0.15
XLOC_000070	0	0	0	0	0	0.05	0	0.14	0.06	0	0	0.08	0	0	0	0.03	0	0.04	0.05	0.1	0.1	0.26	0.08	0.18	0.06	0.38	0	0	0	0.25	0.03	0	0	0	0	0.1	0.27	0.11	0	0.06	0.06	0	0.06	0.13	0.19	0.06	0	0	0
XLOC_000072	0.1	0.1	0.43	0.1	0.07	0.13	0.07	0.13	4.21	5.86	6.48	7.74	9.16	8.4	6.31	8	5.21	4.31	5.79	4.84	5.04	6.04	6.08	5.58	3.37	3.9	4.38	4.96	4.02	5.51	5.69	4.66	2.61	3.07	3.29	3.01	3.49	3.62	5.11	2.91	4.08	4.91	6.03	5.38	5.85	7.01	5.84	6.17	3.9
XLOC_000073	1.95	2.17	1.72	2.15	1.84	2.07	1.79	1.17	0.02	0.01	0.09	0.02	0.02	0	0.03	0	0.05	0.05	0.53	0.48	0.69	0.71	0.44	0.39	0.15	0.17	0.44	0.29	0.82	0.76	1.13	0.79	0.21	0.21	0.29	0.1	0.02	0.16	0.13	0.04	1.02	1.12	2.3	1.92	2.88	2.01	2.04	1.57	0.19
XLOC_000074	0	0	0	0	0	0	0	0	0.07	0.02	0.43	0	0.08	0.05	0.09	0.02	0.06	0.19	0.06	0	0	0.03	0.03	0	0	0	0.1	0.03	0	0	0	0	0.03	0.08	0.12	0.24	0.14	0.04	0.07	0.51	0.05	0.09	0	0	0	0	0	0	0.05
XLOC_000077	0.08	0.07	0.04	0.15	0.2	0.11	0.13	0.07	0.17	0.17	0.27	0.23	0.1	0.13	0.22	0.09	0.06	0.04	0.09	0.18	0.18	0.14	0.13	0.01	0.09	0.04	0.17	0.11	0.28	0.19	0.45	0.17	0.39	0.5	0.97	0.56	0.74	1.52	0.35	0.63	0.17	0.07	0.18	0.17	0.27	0.03	0.34	0.19	0.06
XLOC_000078	0.18	0.3	0.24	0.38	0.18	0.22	0.3	0.23	0.04	0.27	0.15	0.14	0.08	0.29	0.06	0.11	0.26	0.17	0.22	0.11	0	0.04	0.06	0.16	0.29	0.16	0	0.04	0.39	0.15	0.22	0.18	0.11	0.11	0.28	0.18	0.35	0.15	0.34	0	0.45	0.4	0.37	0.07	0	0.18	0.08	0.2	0.08
XLOC_000084	0.05	0.62	0.04	0.17	0.11	0.32	0.15	0.05	0.09	0.14	0.03	0.06	0.17	0.3	0.06	0.15	0	0	0.16	0.16	0.05	0.07	0.13	0.05	0.06	0.12	0.03	0.08	0.03	0.06	0	0	0.04	0	0.45	0.31	0	0.33	0.31	0.3	0.09	0.09	0.18	0.19	0.29	0.55	0	0.18	0.12
XLOC_000085	0.12	0	0	0	0	0	0	0	0.14	0	0.21	0	0	0	0	0	0.04	0	0	0	0	0	0.05	0	0.03	0.44	0	0	0	0	0	0	0.13	0	0	0.11	0	0	0	0	0	0	0	0	0.03	0	0	0	0.07
XLOC_000087	0	0	0.13	0	0	0.01	0	0	0.07	0	0.16	0.06	0.03	0.07	0.03	0.05	0.39	0.26	0.25	0.24	0.11	0	0.28	0.07	0.11	0.13	0.15	0.58	0.29	0.01	0.13	0	0.18	0.16	0.12	0.36	0.09	0.18	0.29	0.07	0.11	0.42	0.16	0.12	0.06	0.06	0.15	0.13	0.04
XLOC_000092	0	0.06	0.32	0.63	0.18	0.23	0.2	0.16	0.29	0.23	0.23	0.26	0.19	0.25	0.74	0.28	0.06	0.17	0	0.09	0.08	0.38	0.11	0.34	0.02	0.1	0.83	0.02	0.36	0.16	0.55	0.11	0.45	0.26	0.96	1.48	0.88	0.78	0.83	1.61	0.34	0.2	0.57	0.92	0.26	0.59	0.73	0.3	0.1
XLOC_000093	0	0.02	0	0.03	0	0	0.06	0.03	0.18	0	0	0.04	0.02	0.02	0.15	0.12	0.02	0	0	0	0	0.04	0	0.06	0.04	0	0.15	0.1	0.04	0	0.11	0	0.07	0.12	0.6	0	0	0.03	0.08	0.08	0.02	0.04	0	0.05	0.04	0.02	0.07	0.02	0
XLOC_000094	0.11	0.04	0.04	0.04	0.02	0.02	0.01	0.02	0.01	0.04	0.25	0.04	0.02	0.02	0.01	0.01	0.74	0.67	0.92	0.6	0.73	0.86	0.53	0.49	0.83	0.7	0.39	0.2	0.36	0.56	0.51	0.51	1.29	1.01	0.29	0.09	0.04	0.19	0.15	0.03	1.03	2.03	1.1	1.3	1.13	1.05	0.81	1.12	0.95
XLOC_000097	0.08	0.05	0	0.03	0	0	0.04	0.04	0.09	0.1	0.25	0.1	0.13	0.04	0.22	0.05	0	0	0.08	0.08	0.07	0	0.22	0	0.04	0	0	0	0	0	0.13	0.34	0	0.18	0	0	0	0	0.09	0	0.13	0.11	0.09	0.16	0.33	0.02	0.3	0	0.04
XLOC_000102	0	0.13	0.07	0.08	0	0.06	0	0	0.15	0.13	0.03	0.12	0.03	0.04	0.21	0.02	0.11	0.05	0.16	0.09	0	0.12	0.05	0.05	0.2	0.02	0.05	0.17	0.02	0	0	0	0.21	0.17	0.15	0.03	0	0.13	0.07	0.11	0	0.21	0	0	0.13	0.15	0.04	0	0.18
XLOC_000107	0	0	0	0.03	0	0	0.07	0.07	1.23	0.55	0	0.23	0.11	0.11	0.22	0.09	0	0.03	0	0	0	0	0	0	0	0	0	0	0	0	0	0	0.64	0.21	1.96	1.49	2.25	3.74	0.79	1.18	0	0	0	0	0.05	0	0	0	0
XLOC_000109	0	0	0	0	0	0.33	0	0	0	0	0	0.05	0	0.6	0.07	0	0	0	0	0	0	0.63	0	0	0	0	0	0	0	0.44	0	0	0	0	0.06	0	0	3.06	0.11	0	0	0	0	0.02	0	0.25	0	0	0
XLOC_000111	0.45	0.49	0.81	0.82	0.9	2.07	1.86	1.48	0.67	0.75	2.63	0.95	0.64	1.39	1.96	1.93	0.14	0.23	0.59	0.34	0.62	0.92	0.63	0.4	0.51	0.42	1.07	0.82	0.97	1.28	1.64	1.85	3.16	3.56	5.3	5.35	3.59	8.12	3.48	5.84	0.32	0.54	0.86	1.83	0.91	1.41	1.67	1.62	0.48
XLOC_000116	0	0	0	0	0	0	0	0	0.05	0	0.12	0.29	0.34	0.04	0.52	0.22	0	0	0.08	0	0.07	0	0	0.07	0.13	0	0	0	0.87	0	0	0.05	0	0	0.15	0	0	0	0	0.18	0	0	0	0	0	0	0	0	0.09
XLOC_000117	0	0	0	0	0	0	0	0	0.43	0.63	0.2	0.35	0.19	0.21	0.04	0.06	0.18	0.39	0.1	0.08	0.15	0.05	0.16	0.02	0.54	0.18	0.05	0.17	0.11	0.04	0.03	0.04	0.45	0.46	0.28	0.25	0.28	0.37	0.19	0.2	0.22	0.36	0.13	0.1	0.12	0.03	0.06	0.04	0.28
XLOC_000118	0.05	0.03	0	0	0	0	0.04	0.04	0.08	0.06	0	0.05	0.02	0.03	0.03	0	0	0.14	0.05	0.16	0	0.03	0.07	0.04	0.01	0.21	0.23	0.04	0	0.08	0.1	0	0.48	0.07	0.02	0.13	0.06	0	0.03	0.03	0.13	0.21	0.03	0.18	0.26	0.06	0	0.09	0.21
XLOC_000123	0.08	0	0	0	0.08	0	0.07	0	0.21	0.08	0	0.02	0.02	0	0.06	0.04	0.03	0.09	0	0.11	0	0	0.03	0	0	0.43	0.04	0.14	0	0.02	0	0	0	0.06	0	0	0.03	0	0.09	0	0	0	0.28	0.08	0.21	0.09	0.05	0	0
XLOC_000125	0	0.06	0	0.03	0	0.11	0	0	0.15	0.09	0.25	0.25	0.07	0.15	0.07	0	0.12	0.1	0.22	0	0.16	0.05	0.2	0.18	0.05	0	0	0.09	0.05	0	0	0.21	0	0.19	0.04	0.76	0.04	0	0.05	0	0	0.07	0.12	0	0.08	0.1	0.09	0	0
XLOC_000130	0	0	0	0	0	0	0	0	0	0.03	0.16	0	0.07	0	0.07	0.07	0	0	0	0	0	0	0	0	0	0	0	0	0	0	0	0	0	0	0.51	0.24	0.26	2.01	0.07	0	0	0	0	0	0	0.07	0	0	0
XLOC_000133	0	0	0	0	0.03	0	0	0	0	0.06	0	0.08	0.03	0.02	0	0.35	0	0.04	0	0.11	0.05	0	0	0.05	0	0	0.02	0	0.18	0	0	0	0	0	0	0.34	0.05	0	0	0.06	0	0	0	0	0	0	0	0.06	0.06
XLOC_000134	0.49	0.81	0.43	0.56	1.02	0.28	0.9	1.06	0.03	0.17	0.06	0.2	0.06	0.18	0.36	0.03	0.08	0.17	0	0.05	0.05	0	0.09	0.23	0	0.09	0.03	0	0	0.03	0.18	0.13	0	0.12	0	0	0.05	0.11	0	0	0.18	0.39	0.37	0.27	0	0.29	0.04	0.7	0.06
XLOC_000135	0.78	1.27	0.86	1.03	0.82	1.44	1.53	1.75	0.12	0.14	0.16	0.17	0.51	0.53	0.06	0.09	0	0.24	0.32	0.1	0.47	0.82	0.17	0.45	0.2	1.06	0.09	0.08	0.2	0.56	0.08	0.03	0.23	0.23	0.15	0.26	0.04	0.38	0	0.82	0.57	0.83	0.73	0.53	0.59	0.66	1.13	1.06	0
XLOC_000139	0.23	0.33	0.56	0.33	0.46	0.24	0	0.5	0.23	0.05	0.07	0.15	0.08	0.12	0.06	0.06	0.02	0.04	0	0	0.05	0.13	0.08	0.13	0.06	0.04	0.06	0.12	0.02	0	0.08	0.16	0.17	0	0.12	0.25	0.02	0.05	0.09	0.03	0.09	0.03	0.09	0.05	0.08	0	0	0.03	0.06
XLOC_000141	0.56	0.47	0.52	0.54	0.26	0.16	0.44	0.18	0.12	0.16	0.16	0.32	0.16	0.35	0.1	0.29	0.25	0.13	0.13	0.36	0.15	0.25	0.03	0.11	0.12	0.05	0.19	0.14	0.22	0.41	0	0.37	0.09	0.23	0.19	0.18	0.04	0.21	0.22	0	0.09	0.32	0.45	0.11	0.26	0.12	0.11	0.22	0.12
XLOC_000142	0	0	0	0	0	0	0	0	0.18	0.45	0.94	0.25	0	0.04	0.13	0.09	0.95	0.73	0.56	0.31	0.28	0.57	0.44	0.2	0.79	0.77	1.23	0.73	1.08	0.37	0.34	0.72	1.36	2.09	0.51	2.38	0.27	0.89	0.36	1.06	0.09	0.21	0.66	0.08	0.09	0.8	0.53	0.43	0.8
XLOC_000143	0	0	0	0	0	0	0	0	0.31	0.05	0.29	0.17	0	0	0.12	0.02	0.12	0.13	0.04	0.17	0.06	0.17	0.06	0.06	0.02	0.11	0	0.13	0	0	0	0.04	0.05	0	0.07	0	0	0	0	0.12	0.04	0	0.04	0	0	0	0.07	0	0.04
XLOC_000146	0.14	0.31	0.65	0.58	0.62	0.3	0.13	0.34	0.59	0.62	0.6	0.52	0.9	0.49	0.44	0.54	0.12	0.08	0.53	0.64	0.63	0.3	0.5	0.42	0.49	0.63	0.25	0.71	0.67	0.39	0.06	0.26	1.16	0.36	0.62	0.92	1.05	0.32	0.6	0.63	0.33	0.32	0.8	0.37	0.58	0.31	0.4	0.35	0.67
XLOC_000150	0	0.08	0	0	0.11	0	0	0	0	0	0	0.51	0	0	0.06	0	0	0	0.06	0	0	0	0	0	0	0	0	0	0.21	0	0	0	0	0	0	0	0	0	0	0	0	0	0	0	0	0	0	0	0
XLOC_000151	0	0	0	0.11	0	0.04	0	0	0.49	0.17	0.55	0.49	0.1	0.08	0.08	0.27	0.49	0.39	0.56	0.76	0.21	0.45	0.51	0.2	0.26	0.63	0.13	0.33	0.63	0.22	0.22	0.17	0.77	0.34	1.63	1.12	0.79	0.14	0	0.93	0.48	1.33	0.44	0.23	0.27	0.47	0.66	0.12	0.41
XLOC_000152	0	0	0	0	0	0	0	0	0	0	0.02	0.01	0	0	0	0	0.26	0.07	0.26	0.19	0.25	0.04	0.12	0.06	0.25	0.02	0.07	0	0.1	0.07	0.2	0.24	0.3	0.3	0	0.02	0	0	0.04	0	0.02	0.04	0.05	0.09	0	0	0	0	0.34
XLOC_000153	0.37	0.01	0.13	0.25	0.05	0.23	0.03	0.09	0.44	0.38	0.24	0.14	0.16	0.33	0.75	0.35	0.09	0.05	0.12	0.02	0.06	0.13	0.39	0.09	0.14	0.14	0	0.12	0.07	0.03	0.07	0.34	0.43	0.37	0.57	0.87	0.78	0.49	0.61	0.51	0.06	0	0	0.23	0.1	0.21	0.22	0.05	0.04
XLOC_000154	0.07	0.08	0.22	0.07	0.08	0.12	0.09	0.04	0.08	0.04	0.19	0.01	0.07	0.02	0.13	0.06	0.08	0	0	0.03	0.06	0.02	0.04	0	0	0.05	0.06	0.03	0	0.03	0.14	0	0.08	0.07	0.25	0.25	0.19	0.2	0.39	0.25	0	0	0	0	0.07	0.03	0.04	0	0
XLOC_000157	0.17	0	0.05	0.01	0.2	0	0.09	0.06	0.24	0.36	0.64	0.46	0.38	0.28	0.53	0.46	0.04	0.17	0.1	0.02	0.03	0	0.19	0.29	0.06	0	0.19	0.11	0.15	0.02	0.22	0.1	0.16	0.1	0.32	1.09	0.22	0.4	0.43	0.82	0.12	0.09	0.09	0.15	0.04	0.06	0.07	0.25	0.08
XLOC_000159	0	0	0	0	0	0	0	0	0.04	0	1.65	0.16	0.08	0.5	0.08	0	6.32	6.72	10.61	9.63	14.38	6.02	9.28	11	3.81	6.08	10.7	13.82	7.83	5.91	4.48	8.92	1.98	2.63	6.84	0.79	3.24	1.91	2.31	4.67	3.58	4.33	3.77	3.95	4.68	3.25	3.71	3.15	5.83
XLOC_000160	0	0	0	0	1.06	0	0	0	0.45	0.12	1.49	0.29	0.21	0.31	0.43	0.09	3.75	2.15	2.74	2.33	1.47	1.69	1.05	3.84	5.11	6.32	3.61	2.01	1.78	3.97	0.91	2.85	2.91	4.7	0.51	0.08	0.4	0.56	1.43	2.09	2.69	5.93	2.51	3.24	0.87	1.77	2.63	3.04	2.88
XLOC_000161	0	0	0	0	0	0	0	0	0.18	0.05	0.59	0.14	0.31	0.38	0.12	0.18	3.56	1.88	2.63	2.23	2.12	1.83	1.9	2.45	2.48	5.22	2.45	2.62	1.33	4.34	0.84	1.82	2.29	3.46	0.83	0.46	0.18	0.43	0.48	0.59	2.03	3.42	1.98	2.31	1.51	2.19	2.08	2.01	1.99
XLOC_000164	0	0	0	0	0	0	0	0.01	0	0	0.04	0	0	0.01	0	0.01	2.01	2.59	0.16	0.3	0.08	0.14	0.11	0.03	0.86	0.54	0	0.22	0	0	0	0	0.13	0.06	0.04	0	0.02	0	0	0	0	0	0.04	0	0	0	0	0	0.12
XLOC_000170	0.02	0.05	0	0	0	0.02	0.04	0	0.04	0.09	0.04	0.01	0.01	0	0	0	0.23	0.09	0.3	0.09	0.04	0.05	0.07	0.12	0	0.15	0.05	0.04	0.03	0.11	0.01	0	0.47	0.12	0.04	0	0.02	0	0.03	0	0.11	0.17	0.05	0.06	0.11	0.19	0.14	0.02	0.33
XLOC_000172	0.53	0.44	0.32	0.35	0.4	0.44	0.49	0.54	0.14	0.27	0.35	0.13	0.34	0.52	0.23	0.46	0.38	0.06	0.21	0.1	0.2	0.42	0.18	0.14	0.1	0.21	0.14	0.19	0.04	0.27	0.02	0.29	0.16	0.3	0.32	0.08	0.25	0.11	0.52	0.28	0.31	0.49	0.09	0.23	0.21	0.07	0.26	0.29	0.09
XLOC_000177	0.04	0.02	0.01	0.01	0.03	0.01	0	0.03	0.97	1.49	0.8	0.76	0.65	0.66	0.51	0.89	1.58	1.44	0.92	0.85	0.69	0.51	0.68	0.97	0.78	1.06	0.62	0.78	0.51	0.5	0.48	0.5	0.8	0.96	0.8	0.53	0.53	0.75	0.66	0.72	0.29	0.69	0.08	0.11	0.03	0.13	0.06	0.13	1
XLOC_000185	6.73	4.21	1.93	4.23	6.18	5.17	6.85	2.68	6.16	3.55	1.16	4.94	3.6	4.38	4.45	3.03	3.02	5.68	0.67	3.3	3.99	4.38	3.21	1.88	7.39	5.45	1.83	4.82	6.97	7.75	5.42	4.15	5.42	3.48	1.43	4.88	5.81	6.15	3.85	2.09	5.44	1.58	0.86	4.12	5.77	4.47	2.96	2.4	6.03
XLOC_000186	1.61	469.35	80.67	2.25	0.86	1.59	3.08	1.42	2.43	1145.31	505.35	3.6	1.04	2.78	2.24	2.18	853.75	2.13	459.44	2.77	1.5	2.52	2.67	2.16	2.63	1270.1	481.17	3.89	2.67	3.65	4.39	3.98	2.26	446.14	427.92	3.06	2.18	3.47	1.55	2.49	0.96	504.94	136.08	1.35	0.74	0.75	0.75	1.43	2.65
XLOC_000187	1.39	2.15	6.33	3.06	2.48	1.95	3.2	3.39	0.49	0.21	1.02	0.62	0.49	1.03	1.13	1.13	0.31	0.5	0.48	0.68	0.55	0.21	0.83	0.93	0.56	0.41	1.1	1.13	0.3	0.73	0.7	0.59	0.54	1.48	1.51	0.72	0.75	0.86	0.86	0.98	1.13	1.38	2.49	2.26	2.58	1.78	1.54	2.21	0.29
XLOC_000188	0.97	0.45	1.23	0.47	0.51	0.71	0.34	0.66	0.09	0.12	0.04	0.59	0.24	0.84	0.33	0.34	0.05	0.06	0	0.22	0.2	0.27	0	0.26	0.46	0.2	0.46	0.54	0.28	0.44	0.2	0.23	0.22	0.17	0.35	0	0	0.08	0.26	0.08	0.16	0	1.54	0.41	0.62	0.13	0.96	0.51	0.17
XLOC_000192	0	0	0	0.03	0	0	0	0	0.12	0.04	0	0.24	0.04	0	0	0.12	0	0.22	0.16	0.2	0.26	0	0.06	0.1	0.07	0.02	0.07	0.36	0	0.15	0.26	0.02	0.12	0.06	0	0	0.14	0.17	0	0	0	0	0.23	0	0.02	0	0	0.06	0.69
XLOC_000193	0.22	0.03	0.04	0.02	0	0.05	0.06	0.07	0.09	0.05	0.29	0.06	0.04	0.1	0.05	0.31	0	0	0.05	0.06	0.02	0.02	0.01	0.03	0	0	0.14	0	0.02	0.08	0.12	0.19	0.46	0.12	0.73	0.23	0.18	0.54	0.17	0.94	0	0	0.15	0.07	0.03	0.06	0.14	0.24	0
XLOC_000194	0.21	0.06	0.27	0.13	0.1	0.24	0.07	0.42	0.51	0.23	1.33	0.43	0.18	0.62	0.33	1.48	0.04	0.08	0.29	0.02	0.21	0.27	0.17	0.36	0.08	0.15	0.39	0.11	0.09	0.3	0.16	0.42	1.01	0.7	5.6	1.93	1.26	4.09	0.97	4.03	0.31	0.05	0.47	0.21	0.05	0.22	0.31	0.56	0.1
XLOC_000195	0	0.1	0.06	0	0	0	0.05	0	0.03	0	0.08	0.03	0	0.02	0.02	0.03	0	0.02	0.15	0.06	0.16	0.04	0.09	0.13	0.03	0	0.18	0	0.17	0.02	0.19	0.04	0.09	0.09	0	0	0.05	0	0.1	0.03	0	0	0.05	0.06	0.05	0.2	0.04	0.1	0.03
XLOC_000196	0.15	0.05	0.1	0	0.08	0	0	0.09	0.04	0.02	0.15	0	0.05	0.09	0.08	0.04	0.08	0.18	0.19	0.03	0.26	0.08	0.31	0.17	0.14	0.1	0.32	0.09	0.01	0.02	0	0.05	0.1	0.19	0.16	0	0	0.16	0.02	0.08	0.15	0.05	0.21	0.07	0.1	0.02	0.06	0.08	0.15
XLOC_000197	0.12	0.06	0.15	0.06	0.44	0.07	0.15	0.11	0.02	0.24	0.06	0	0.04	0.02	0.11	0	0.35	0.25	0.17	0.36	0.15	0	0.33	0.53	0.14	0.18	0.11	0.38	0.15	0.05	0.18	0.28	0.12	0	0.04	0.04	0	0.04	0.09	0	0.34	0.16	0.05	0.04	0.19	0.07	0.33	0.31	0
XLOC_000198	0	0	0	0	0.33	0.07	0.08	0.15	0.29	0	0.06	0.24	0.13	0	0.09	0.22	0.06	0.03	0.17	0.12	0.08	0.1	0.13	0	0.28	0.09	0	0.04	0.26	0.07	0.16	0.08	0	0	0	0	0.39	0	0.05	0	0.09	0.05	0.02	0.25	0.42	0.02	0.11	0.08	0.23
XLOC_000201	0.16	0	0.24	0.39	0.22	0.28	0	0.24	0.13	0	0.03	0.09	0.21	0.12	0.21	0.32	0	0	0.17	0	0	0.13	0.04	0	0.52	0	0.06	0	0.03	0	0.44	0.2	0.08	0.89	0.72	0.75	1.46	0.74	0.51	1.42	0	0	0	0.11	0	0	0.45	0	0
XLOC_000202	0.07	0.08	0.31	0.15	0.28	0.41	0.39	0.42	0.35	0.02	0.05	0	0.04	0.08	0.07	0.03	0.1	0.24	0.17	0.09	0.19	0.14	0.28	0.06	0.08	0.06	0.09	0.02	0.09	0.07	0.03	0.2	0.07	0	0.2	0.02	0.04	0	0.16	0	0.08	0.19	0.15	0.1	0.1	0.3	0.13	0.18	0.08
XLOC_000209	0.12	0.27	0.2	0.37	0.64	0.24	0.69	0.08	0.18	0.28	0.18	0.33	0.12	0.21	0.43	0.32	0.6	0.62	0.5	0.36	0.2	0.68	0.64	0.61	0.71	0.27	0.52	0.29	0.21	0.37	0.38	0.11	0.74	0.09	0.29	0.09	0.29	0.35	0.5	0.35	0.55	0.68	0.47	0.5	0.64	0.26	0.7	0.13	0.46
XLOC_000212	0	0.01	0	0	0	0	0	0	0	0.03	0.25	0	0	0	0	0	0.96	1.12	0.33	0.7	0.83	0.38	0.55	0.41	0.91	0.05	0	0	0.06	0.06	0.33	0.22	0.83	0.17	0.01	0.04	0	0.15	0	0	0.02	0	0	0.16	0.02	0	0	0.02	0.89
XLOC_000213	0	0.16	0.19	0.37	0	0.14	0.09	0.09	0.12	0.16	0.22	0.09	0.07	0.06	0.13	0.08	0.09	0.26	0.17	0.29	0.06	0	0.18	0.11	0.19	0.05	0.39	0.29	0.66	0.49	0.2	0.14	0.02	0.15	0.53	0.26	0.09	0.14	0	0.19	0.18	0.18	0.3	0.27	0.31	0.16	0.07	0.11	0.34
XLOC_000214	0	0	0.05	0	0	0	0.26	0	0.08	0	0	0.07	0.04	0.2	0	0.08	0	0	0	0	0.06	0.08	0	0.06	0	0.34	0.04	0.15	0	0.12	0.45	0.21	0.15	0	0	0.82	0.18	1.08	0	0	0	0	0.39	0.32	0.29	0	0.19	0	0
XLOC_000218	0.05	0.13	0.04	0.23	0.67	0	0.13	0.39	0.34	0.08	0.03	0.1	0.32	0.11	0.08	0.23	0.24	0.45	0	0.14	0.22	0.41	0.08	0.17	0.08	0.08	0.22	0.03	0.21	0.49	0.05	0.06	0.78	0.14	0.05	0.05	0.13	0.1	0.28	0.55	0.51	0.13	0.05	0.42	0.03	0.18	0.2	0.17	0.38
XLOC_000220	0.13	0.25	0.1	0.6	0.13	0.31	0.12	0.21	0.17	0.09	0.09	0.14	0.14	0.13	0.07	0.27	0.09	0.08	0.17	0.19	0.15	0.12	0.11	0.17	0.04	0.16	0	0.14	0.04	0.04	0	0.06	0.05	0.02	0.22	0.19	0	0.27	0.12	0.11	0.15	0	0	0.15	0.55	0.14	0.11	0	0.11
XLOC_000223	0.26	0.21	0	0.33	0.25	0.04	0.05	0.27	0.18	0.35	0.13	0.52	0.08	0.15	0.09	0.15	0.22	0.04	0.1	0.15	0	0.31	0.2	0.09	0.06	0.23	0.06	0.29	1.06	0.18	0	0	0	0.19	0.05	0.25	0.04	0.16	0.12	0.06	0.06	0	0.06	0.26	0.09	0.03	0	0.14	0.12
XLOC_000228	0.54	0.49	0.56	0.61	0.38	0.38	0.36	0.72	0.05	0.09	0.09	0.05	0.06	0.16	0.06	0.09	0.07	0	0.04	0.01	0.09	0.05	0	0.07	0.11	0.01	0.04	0.03	0.06	0.01	0.08	0.09	0.05	0.06	0.06	0.03	0.11	0.24	0.03	0.06	0.03	0.02	0.09	0.01	0.13	0.03	0	0.03	0.1
XLOC_000229	0.4	0.59	0.51	0.31	0.59	0.36	0.75	0.51	0.3	0.54	0.43	0.51	0.27	0.46	0.32	0.33	0.35	0.27	0.27	0.23	0.18	0.26	0.26	0.3	0.13	0.37	0.22	0.21	0.42	0.15	0.16	0.18	0.16	0.25	0.13	0.08	0.17	0.19	0.23	0.21	0.21	0.22	0.1	0.1	0.27	0.07	0.15	0.22	0.09
XLOC_000231	0	0	0.12	0.15	0.28	0.14	0.62	0.25	0.04	0	0	0	0.02	0.09	0	0	0	0	0.03	0.12	0	0.08	0	0	0	0	0	0	0	0	0	0	0	0	0.15	0	0.14	0	0	0	0	0	0	0	0	0.06	0	0	0
XLOC_000232	0	0.03	0	0.18	0	0.08	0.38	0.52	0	0	0	0	0	0	0	0	0	0	0	0	0	0	0	0.04	0	0	0	0	0	0	0	0	0	0	0	0	0	0	0	0.05	0	0.02	0	0	0	0	0	0	0
XLOC_000233	0.36	0.07	0.26	0.2	0.51	0.27	0.05	0.5	0.21	0.16	0.13	0.49	0.08	0.12	0.03	0.18	0.04	0	0	0.1	0.05	0.13	0.08	0.13	0	0	0.03	0.03	0	0.06	0	0.03	0	0	0.29	0.25	0.13	0.32	0.06	0.12	0	0	0	0.1	0.15	0.34	0	0.18	0.06
XLOC_000240	0.24	0.18	0.01	0.11	0.23	0.15	0.13	0.21	0.07	0.21	0.32	0.19	0.16	0.18	0.44	0.15	0.06	0	0.07	0.1	0.06	0.06	0.2	0.22	0.02	0.04	0.14	0.2	0.18	0.15	0.21	0.29	0.04	0.21	0.25	0.12	0.12	0.25	0.38	0.23	0.02	0.06	0.13	0.11	0.25	0.31	0.13	0.15	0.1
XLOC_000241	0.11	0.05	0.03	0.04	0.13	0.28	0.23	0.38	0.84	0.52	1.19	0.45	0.23	0.28	0.63	0.81	0.44	0.44	1.29	1.8	1.1	1.89	2.56	1.48	1	0.44	0.95	0.56	1.32	1.25	1.69	1.86	0.97	1.05	1.07	1.16	0.51	1.46	1.08	0.77	0.93	0.36	0.49	0.75	0.61	0.95	0.71	0.4	0.44
XLOC_000244	0	0	0	0	0	0	0	0	0	0	0	0	0	0	0	0	0	0	0	0	0	0	0	0	0	0	0	0	0	0	0	0	0.83	0	0	0	0	0	0	0	0	0	0	0	0	0	0	0	0
XLOC_000252	0	0	0	0.05	0	0	0.03	0	0.02	0.23	0.07	0	0.06	0.06	0.08	0.02	0	0	0.07	0	0.06	0.12	0.08	0	0.1	0	0.19	0.05	0	0.1	0	0	0.02	0.03	0.35	0.3	0.15	0.04	0.24	0.08	0.04	0	0	0	0	0.2	0.09	0	0.04
XLOC_000258	0.1	0.03	0.02	0	0.02	0.04	0.19	0.04	0.66	0.17	0.15	0.09	0.08	0.06	0.21	0.15	0.02	0	0.13	0.1	0.07	0	0.16	0.15	0.17	0	0.04	0.17	0.17	0.14	0.05	0.22	0.18	0	0.14	0.05	0.2	0.13	0.29	0.23	0	0.14	0.07	0.1	0.11	0.17	0.1	0.09	0.06
XLOC_000260	0.04	0.05	0.05	0.02	0.08	0.03	0.36	0.05	1.76	1.71	2.27	2.04	2.99	4	1.5	2.25	0.46	0.76	0.23	0.4	0.29	0.39	0.18	0.4	0.91	0.53	0.32	0.47	0.45	0.41	0.23	0.29	0.63	0.35	0.19	0.68	0.36	0.45	1.1	0.44	0.71	0.27	0.27	0.21	0.42	0.18	0.17	0.15	0.64
XLOC_000262	0.04	0.11	0.13	0.1	0.13	0.14	0.19	0.08	2.88	2.38	1.92	2.11	3.24	2.9	2.46	1.36	0.89	0.57	1.14	0.46	0.38	0.76	0.51	0.49	0.53	0.61	0.54	0.58	0.32	0.93	0.9	0.51	0.26	0.43	1.12	1.19	1.42	1.04	1.32	1.14	0.27	0.18	0.12	0.13	0.34	0.11	0.29	0.19	0.34
XLOC_000267	0	0.03	0	0	0.04	0	0	0	0	0.12	0	0.02	0.22	0.39	0.05	0	0.07	0.07	0.19	0.09	0.33	0.22	0.18	0.04	0	0.25	0.21	0.1	0.17	0	0	0.06	0	0.14	0	0	0	0	0.26	0	0.03	0.55	0.18	0.05	0.16	0.17	0.19	0.06	0
XLOC_000268	0.02	0.03	0.03	0	0	0	0	0.02	0.04	0.06	0	0.04	0.11	0.04	0.23	0.12	0.03	0.05	0.05	0.02	0.02	0.23	0.09	0.04	0.05	0.05	0	0	0.06	0	0	0.07	0	0.02	0.02	0.09	0.04	0	0.13	0	0.01	0.15	0	0.04	0	0.01	0.03	0	0.03
XLOC_000270	0	0.05	0	0	0	0	0.07	0	0	0	0.41	0	0	0.04	0	0	0	0	0.14	0	0	0	0	0	0	0	0	0	0	0	0	0	0	0.05	0.07	0	0	0	0	0	0	0	0	0	0	0	0.05	0	0
XLOC_000272	0	0	0	0	0	0	0.07	0	0	0	0	0	0	0	0	0	0	0	0	0	0	0	0	0	0	0	0	0.04	0	0	0	0	0	0	0	0	0	0	0	0.09	0	0	0.58	0	0	0	0	0	0
XLOC_000273	0	0.08	0	0.05	0	0	0.05	0.1	0	0	0	0	0	0	0	0	0	0	0	0	0	0	0	0	0	0	0	0.03	0	0	0	0	0	0	0	0	0	0	0	0	0	0	0.49	0.12	0	0	0	0	0.07
XLOC_000274	0.06	0	0.06	0.16	0	0.05	0.05	0	0	0	0.01	0.03	0.03	0	0.11	0	0.02	0	0.46	0.14	0.18	0.24	0.16	0.27	0.03	0	0.08	0.07	0.05	0.39	0.06	0	0	0	0.08	0	0	0	0	0	0	0.12	0.05	0.06	0.08	0.03	0.1	0.04	0
XLOC_000279	0.04	0.06	0.08	0.07	0.02	0.06	0	0.02	0.1	0.4	0.16	0.03	0.18	0.31	0.04	0.17	0.03	0.03	0.04	0	0.05	0	0	0	0	0.03	0.06	0	0	0.03	0	0.03	0.03	0.12	0.05	0.04	0.06	0	0	0	0	0.03	0	0	0.14	0	0	0	0.04
XLOC_000280	0	0	0	0	0	0	0	0	0.41	0.34	0.15	0.19	0	0	0.13	0.07	0	0	0.06	0	0	0	0	0	0	0	0	0	0	0	0	0.18	0.17	0.09	0.82	0.23	0.1	1.51	0.2	0	0	0	0	0	0	0	0	0	0
XLOC_000281	0	0	0.05	0.03	0	0	0	0	0	0	0.07	0	0.15	0.06	0	0	0	0	0.11	0.03	0.06	0.04	0.11	0.03	0	0	0.06	0	0	0	0.26	0	0	0	0.49	0.21	0.09	0	0	0.32	0	0	0.14	0.02	0	0	0.12	0	0.04
XLOC_000283	1.67	2.15	1.8	1.97	1.72	2.12	1.88	2.2	0.03	0.04	0.07	0.08	0	0.03	0.13	0.1	0.07	0.05	0.16	0.04	0.22	0.14	0.37	0.2	0.04	0.06	0.09	0.31	0.25	0.11	0.47	0.16	0.06	0.04	0.07	0.15	0.1	0.2	0.19	0.11	0.11	0.04	0.19	0.23	0.26	0.04	0.15	0.13	0.11
XLOC_000284	0.08	0.11	0.03	0	0	0	0.04	0.07	0	0.31	0	0	0	0	0.05	0	0	0	0	0	0.08	0	0	0.07	0	0	0	0	0	0	0	0.21	0	0.28	0.27	0.08	0	0.3	0	0	0.02	0	0.07	0.02	0	0	0.2	0	0
XLOC_000285	0	0	0	0	0	0	0	0	0	0	0	0	0	0	0	0.09	0.27	0.42	0.16	0.63	0.63	0.39	0.09	0.28	0.24	0.24	0.39	0.53	0.07	0.19	0.38	0.07	0.12	0.16	0	0	0	0	0	0	0.3	0.21	0	0.33	0.03	0	0.15	0	0.73
XLOC_000289	0.02	0	0	0	0	0	0	0	0.04	0.05	0.07	0	0.03	0.01	0.01	0.01	0.56	0.45	0.45	0.13	0.21	0.14	0.22	0.47	0.64	0.33	0.09	0.2	0.14	0.2	0.04	0.08	0.37	0.33	0.04	0.16	0.02	0.08	0.07	0	0.13	0.11	0.05	0.08	0.05	0.02	0.02	0	0.43
XLOC_000293	0	0	0	0	0	0	0	0	0.01	0.07	0.13	0	0.02	0	0	0	0.24	0.31	0.16	0.2	0.17	0.13	0.21	0.09	0.06	0.12	0.02	0.05	0.09	0.02	0.11	0.11	0.14	0.12	0.13	0.03	0	0	0	0	0.18	0.15	0.12	0.04	0.07	0	0.04	0.05	0.2
XLOC_000294	0	0	0	0	0	0	0	0	0	0	0.05	0.03	0	0	0	0	0.11	0	0	0.05	0.07	0.06	0	0.07	0	0	0	0	0.18	0.06	0	0.06	0.11	0	0	0.02	0	0	0	0	0.51	1.45	0.46	0.62	0.89	0.49	0.38	0.68	0.12
XLOC_000296	0.09	0	0	0.03	0.17	0.06	0.02	0	0.33	0.3	0.31	0.24	0.55	0.45	0.43	0.55	0.37	0.25	0.13	0.14	0.06	0.09	0.07	0.05	0.09	0.38	0.05	0.1	0.07	0.07	0.05	0	0.09	0.14	0.15	0.07	0.11	0.22	0.37	0.32	0.08	0.08	0.02	0.05	0	0.01	0.06	0.08	0.1
XLOC_000299	3.75	3.26	2.12	5.06	4.67	3.89	3.16	3.26	0.17	0.26	0.2	0.1	0.03	0	0.05	0.11	0.25	0.17	0.25	0.27	0.57	0.49	0.27	0.48	0.32	0.09	0.16	0.33	0.27	0.28	0.67	0.25	0.41	0.07	0.41	0.73	0	0.1	0.18	0.53	0.31	0.63	0.96	0.85	1.11	1.15	1.25	0.87	0.18
XLOC_000300	0.13	0.21	0.05	0.16	0.3	0.26	0.17	0.28	0.02	0	0.02	0.02	0	0	0.06	0.04	0.03	0.06	0.1	0.02	0.09	0	0	0.05	0.03	0	0.05	0.08	0.07	0.02	0	0.05	0.03	0.08	0.04	0.07	0.2	0.14	0.09	0	0	0	0	0.06	0.04	0.13	0.04	0.01	0
XLOC_000301	0	0	0.02	0.03	0.17	0.07	0	0.04	0.02	0.11	0.12	0.36	0.57	0.33	0.02	0.12	0	0	0	0	0	0	0	0	0	0	0	0.01	0	0	0	0	0	0.02	0.08	0.1	0.07	0.09	0.02	0.07	0	0	0	0	0	0	0	0	0
XLOC_000302	0.35	0.48	0.48	0.52	0.48	0.38	0.32	0.12	0.08	0.14	0.07	0.05	0.05	0.05	0.15	0.13	0	0.03	0	0.09	0.16	0.05	0.28	0	0.27	0.07	0.15	0.25	0.17	0.13	0.05	0	0.03	0.23	0.37	0.43	0.38	0.46	0.31	0.5	0.05	0.02	0.3	0.31	0.24	0.13	0.36	0.12	0
XLOC_000306	0.02	0.01	0.03	0.02	0	0	0	0	0.26	0.19	0.29	0.11	0.34	0.21	0.21	0.02	0	0.03	0.04	0	0	0	0	0	0.01	0	0.01	0	0	0	0	0	0.03	0.01	0.06	0.02	0	0	0.09	0	0	0	0	0	0	0	0	0.01	0
XLOC_000307	0.21	0.08	0.15	0.35	0	0	0.14	0	1	0.45	0.15	0.28	0.46	0.7	0.68	0.27	0.06	0.09	0	0	0	0.14	0.26	0	0	0	0	0.08	0.04	0	0.02	0	0.04	0.15	0.06	0.37	0.28	0.09	0.2	0.23	0	0	0	0.09	0	0.02	0	0	0
XLOC_000310	1.66	1.4	2.19	1.31	1.7	1.79	1.53	2.39	0	0	0	0	0	0	0	0	0	0	0.7	0	0.25	0	0.11	0.18	0.04	0.11	0.5	0.11	0.3	0.74	0.67	0.08	0	0.05	0.52	0.27	0	0	0.24	0	0.46	0.11	0.74	0.35	0.53	0.83	0.42	0.47	0.31
XLOC_000312	0.37	0.41	0.19	0.32	0.33	0.26	0.15	0.18	0.16	0.25	0.47	0.8	0.09	0.21	0.07	0.15	0.07	0.15	0.37	0.23	0.3	0.2	0.19	0.11	0.15	0.22	0.34	0.03	0.4	0.52	0.61	0.21	0.07	0.35	0.53	0	0.23	0.76	0.04	0	0.13	0.18	0	0.4	0.12	0.18	0.09	0.18	0.26
XLOC_000317	0	0.02	0.01	0.01	0	0.03	0.06	0.06	0.22	0.22	0.35	0.37	0.2	0.05	0.49	0.51	0.14	0.12	0.16	0.12	0.04	0.14	0.19	0.21	0.13	0.1	0.19	0.05	0.15	0.17	0.04	0.29	0.2	0.38	0.54	0.23	0.23	0.08	0.45	0.42	0.07	0.01	0.07	0.03	0.17	0.04	0.26	0.07	0
XLOC_000318	0	0	0	0	0	0	0	0	0.04	0	0.23	0.26	0.08	0	0.25	0.09	0	0.03	0.04	0.11	0.1	0	0.06	0.03	0	0	0.15	0.12	0.28	0	0.2	0	0	0.03	0.07	0	0	0	0	0.08	0	0.1	0	0.09	0.09	0.05	0.1	0	0
XLOC_000319	0	0	0	0	0	0	0	0	0.27	0.06	0.28	0.49	0.24	0.24	0.55	0.18	0.17	0.11	0.28	0.52	0.17	0	0.28	0.16	0.12	0	0.33	0.39	0.36	0.04	0.11	0.08	0.58	0	0.16	0.24	0	0.04	0.21	0.1	0.04	0.01	0.68	0.93	0.19	0	0.75	0.08	0.06
XLOC_000321	0	0	0	0	0	0	0	0	0	0	0.01	0	0	0	0	0	0.2	0.09	0.02	0.11	0	0.06	0	0.04	0.18	0.14	0.03	0	0.09	0.03	0	0.14	0.48	0.19	0.13	0.12	0	0.02	0	0	0.08	0.18	0.25	0.2	0	0.09	0.03	0.03	0.16
XLOC_000325	0	0	0	0	0	0	0	0	0	0	0.16	0.12	0.12	0.17	0.11	0.15	0.04	0	0.08	0.12	0	0.15	0.08	0.24	0	0	0.21	0.14	0.09	0.27	0.18	0.14	0.02	0.26	0.19	0.02	0	0	0.29	0	0.14	0.01	0.28	0.08	0.03	0	0	0.09	0.06
XLOC_000328	0.11	0	0.74	0.41	0.28	0.54	0.21	0.2	0.34	0.24	0.42	0.33	0.4	0.39	0.63	0.13	0.2	0.13	0.35	0.5	0.41	0.07	0.73	0.69	0.1	0.28	0.51	0.6	0	0.41	0.68	0.11	0.41	0.34	0.96	0.56	0.3	0.95	0.73	0.32	0.13	0.19	0.42	0.46	0.24	0.41	0.47	0.23	0.19
XLOC_000330	1.15	0.55	0.77	0.74	0.28	0.95	0.72	0.74	0.11	0.1	0.04	0.06	0.08	0.1	0.2	0.05	0.26	0.26	0.05	0.1	0.05	0.1	0.12	0.13	0.13	0.01	0.06	0.12	0.2	0	0.01	0.02	0.34	0.52	0.05	0.13	0.13	0	0.09	0.18	0.14	0.21	0.28	0.22	0.09	0.41	0.27	0.14	0.15
XLOC_000337	0.06	0	0	0	0	0.1	0	0	0	0	0.34	0	0.03	0.03	0	0	0	0	0.24	0	0	0	0	0	0	0	0	0	0	0	0	0	0	0	0.5	0.7	0	0.06	0.28	0.27	0	0	0	0.06	0	0	0	0	0
XLOC_000338	0	0	0.03	0	0	0	0	0	0	0	0	0	0	0	0	0.05	0	0	0	0	0	0	0	0	0	0	0.3	0	0	0	0.04	0	0	0	0.04	0	0	0	0	0.09	0	0	0	0	0	0	0	0	0
XLOC_000341	1.08	1.14	1.04	0.75	0.42	0.75	0.83	0.67	0.35	0.41	0.45	0.34	0.8	0.49	0.37	0.25	0.39	0.1	0.15	0.15	0.23	0.81	0.26	0.3	0.44	0.36	0.51	0.26	0.28	0.31	0.12	0.25	0.58	0.42	0.28	0.63	0.2	0.58	0.38	0.1	0.36	0.32	0.45	0.39	0.29	0.65	0.16	0.37	0.41
XLOC_000344	0.13	0.21	0.23	0.32	0.17	0.05	0.25	0.15	0.57	0.28	0.19	0.38	0.5	0.35	0.41	0.31	0.59	0.44	0.09	0.23	0.19	0.1	0.17	0.14	0.28	0.64	0.53	0.37	0.21	0.27	0.12	0.18	0.81	0.24	0.38	0.19	0.15	0.63	0.2	0.05	0.91	1.53	1.04	0.8	0.34	0.57	0.06	0.83	0.55
XLOC_000345	0	0.04	0	0.05	0.06	0	0.03	0.06	0.4	0.21	0.41	0.53	0.25	0.32	0.28	0.36	0.63	0.89	0.57	0.67	0.68	0.34	0.32	1.15	0.35	0.24	0.26	0.63	0.02	0.11	0.22	0.58	0.41	0.05	0	0.21	0.05	0.13	0.04	0.11	0.31	0.39	0.28	0.46	0.65	0.25	0.45	0.91	0.64
XLOC_000347	0	0	0	0	0	0	0	0	0	0	0	0	0	0	0	0	0	0	0	0	0	0	0	0.04	0	0.16	0	0	0	0	0	0	0	0	0	0	0	0	0	0.1	0	0.05	0.59	0.04	0.1	0.31	0	0	0.14
XLOC_000348	0.05	0.03	0	0	0	0.04	0	0	0.09	0.09	0.09	0.24	0.37	0.47	0.07	0.12	0.31	0.19	0.18	0.12	0.37	0.12	0.12	0.19	0.45	0.25	0.06	0.25	0	0.45	0.07	0.36	0.33	0.24	0.07	0.42	0.26	0	0.12	0.11	0.1	0.1	0.13	0.24	0.06	0.02	0.17	0.1	0.06
XLOC_000349	0.43	0.33	0.33	0.27	0.2	0.3	0.23	0.11	0	0	0.01	0	0.06	0.03	0	0.02	0	0.02	0.08	0.02	0.03	0	0.03	0	0	0	0.03	0	0.09	0.05	0	0	0.02	0	0.04	0	0.02	0	0.02	0	0.03	0.06	0.02	0	0	0.03	0.01	0.01	0.02
XLOC_000351	0	0.04	0.09	0	0	0	0	0	0.85	1.06	0.26	0.81	0.5	0.47	0.57	0.77	0.02	0	0.03	0.03	0	0.04	0.02	0.1	0.07	0.32	0.1	0.11	0.18	0.07	0	0.13	0.04	0.09	0.33	0.29	0.15	0.18	0.51	0.1	0	0	0	0	0	0.07	0	0	0.03
XLOC_000352	0	0	0	0	0	0	0	0	0.38	0.39	0.2	0.33	0.09	0.31	0.32	0.37	0.07	0	0.02	0.02	0.02	0	0	0.02	0	0.33	0	0	0.06	0.06	0.01	0	0.02	0.04	0.07	0.09	0.18	0.07	0.08	0.03	0	0	0	0	0	0.14	0.02	0.02	0.03
XLOC_000360	0	0	0	0	0	0	0	0	0.27	0.14	0	0.07	0	0.14	0.03	0	0.06	0.08	0	0.05	0	0	0	0	0	0	0	0	0	0	0	0	0.31	0.04	0	0	0	0	0	0.06	0	0	0	0.11	0	0	0	0	0.06
XLOC_000361	0	0	0.08	0	0	0	0	0	0.09	0	0.04	0.02	0	0.02	0.06	0	0	0.09	0.04	0	0	0	0.03	0.32	0	0	0	0	0	0	0.18	0.02	0.05	0	0	0	0	0.15	0.3	0.08	0	0	0	0	0	0.04	0	0.15	0.33
XLOC_000363	0	0	0	0	0	0	0	0	0	0	0	0	0	0	0	0	0	0	0	0	0	0	0	0	0	0	0	0	0	0	0	0	0	0	0	0	0	0	0	0.92	0	0	0	0	0	0	0	0.22	0
XLOC_000364	0.06	0.04	0.06	0.39	0.19	0	0.05	0.02	0.05	0.06	0.16	0.16	0.19	0.06	0	0.08	0.04	0.02	0.11	0.08	0.1	0.03	0.09	0.07	0.11	0.15	0.17	0	0.09	0.39	0.06	0	0.04	0.06	0.05	0.22	0	0	0.26	0.03	0.11	0.03	0.05	0.08	0.08	0	0.02	0.13	0
XLOC_000372	0.21	0.35	0.19	0.14	0.12	0.23	0.15	0.15	0.1	0.06	0.25	0.05	0.02	0.01	0	0.01	0.29	0.33	0.4	0.42	0.64	0.42	0.39	0.78	0.24	0.16	0.22	0.26	0.26	0.29	0.11	0.24	0.35	0.35	0.17	0.11	0.06	0.12	0.11	0.1	0.09	0.12	0.11	0.06	0.13	0.09	0.18	0.14	0.34
XLOC_000374	0	0.17	0	0.06	0	0	0.03	0.03	0.04	0	0	0	0.04	0.06	0.02	0.04	0.15	0.05	0	0	0	0.17	0.08	0	0.08	0.33	0	0	0	0.11	0	0	0.28	0	0	0.17	0	0.11	0.08	0.08	0	0	0.1	0.11	0.15	0	0.02	0.1	0
XLOC_000379	0	0	0	0	0	0	0	0	0	0	0.04	0	0.11	0	0.06	0	0.18	0.22	0.18	0.07	0.61	0.3	0.39	0.24	0.52	0.1	0.02	0.29	0.11	0	0	0.04	0.23	0.31	0.07	0	0	0	0.08	0	0.66	0.25	0.63	0.25	0.44	0.21	0.53	0.14	0.2
XLOC_000387	0.4	0.32	0.28	0.72	0.59	0.31	0.47	0.38	0	0	0	0	0	0	0	0	0	0.01	0	0	0.01	0.03	0.04	0.02	0	0	0.03	0	0.04	0	0	0	0.04	0	0	0	0	0	0	0	0	0	0.02	0	0.02	0	0	0.01	0
XLOC_000388	0	0	0	0	0	0	0	0	0.14	0.06	0.15	0.03	0.29	0.17	0.07	0.07	1.27	0.5	0.12	2.25	0.32	1.08	1.7	1.42	0.13	0.91	0.57	1.79	0.07	0.32	0.92	0.84	0.21	0.04	0	2.03	0	0.25	0.07	0.13	0.1	0.26	0	0.18	0	0	0	0	0.27
XLOC_000389	0.39	0.05	0.06	0.25	0	0.2	0.11	0.17	0.46	0.45	0.65	0.75	0.57	1.02	0.39	0.89	0.36	0.36	0.16	0.04	0.21	0.05	0.44	0.17	0.18	0.43	0.24	0.04	0.02	0	0.06	0	0.54	0.17	1.14	0.35	0.51	0.69	0.64	0.58	0	0.02	0.31	0.02	0.05	0.14	0.13	0.05	0.71
XLOC_000393	0.08	0.05	0	0.06	0.04	0.1	0	0.03	1.52	0.39	0.02	1.72	0.57	0.09	0.22	0.34	0.11	0.45	0	0.61	0.99	0	0.19	0.1	0.37	0	0.02	0.71	0.46	0	0	0.36	0.23	0.12	0.04	2.07	0.64	0.45	0.27	1.1	0.04	0.06	0.09	0.53	0.3	0	0.11	0.29	0.62
XLOC_000397	0	0.06	0	0.09	0	0	0	0	0.12	0.13	0	0.15	0.04	0.03	0.12	0.12	0	0.19	0.02	0.05	0.03	0	0.07	0	0.39	0.1	0.03	0.01	0	0.11	0.01	0.1	0.15	0.08	0.14	0.15	0	0.13	0.13	0.15	0	0.01	0.04	0	0.11	0	0	0	0.06
XLOC_000398	0	0	0	0.04	0.1	0	0.05	0	0.49	0.43	0.12	0.08	0.38	1.78	0.24	0.91	0.34	0.76	0.15	0.12	0.14	0.56	0.24	0.63	0.11	0.21	0.29	0.08	0.02	0.29	0.04	0.72	0.2	0.55	0.24	0.02	0	0.08	0.09	0.17	0.21	0	0.01	0.05	0.02	0.24	0.21	0.67	0.2
XLOC_000399	0.46	0.36	0.45	0.25	0.37	0.23	1.13	0.4	0.19	0.41	0.12	0.14	0.07	0.03	0.74	0.24	0.07	0.06	0	0.1	0.05	0.05	0.58	0.05	0	0	0.03	0.07	0.04	0	0.32	0	0.05	0.25	0.42	0.31	0.1	0.06	0.76	0.03	0.02	0	0.15	0.02	0.05	0	0.31	0	0.15
XLOC_000403	0.11	0.12	0.05	0.11	0.45	0.3	0.39	0.44	0	0	0.09	0.22	0.21	0.16	0.45	0.18	0.23	0.14	0.11	0.17	0.13	0.26	0.31	0.15	0.12	0.04	0	0.02	0.2	0.17	0.43	0.13	0.08	0	0	0.07	0.27	0.29	0.2	0.6	0.33	0.04	0	0.21	0.27	0.19	0.24	0.1	0
XLOC_000407	0.01	0.05	0	0.01	0.01	0.02	0	0.04	2.02	1.59	2.01	1.75	0.72	0.55	0.56	1.54	7.2	7.06	6.25	7.61	5.72	5.76	4.13	7.3	5.36	6.42	3.08	5.84	5.66	3.92	2.42	4.51	2.8	3.34	1.29	1.05	0.86	1.36	0.68	0.7	2.42	3.07	1.28	2.4	2.89	1.55	1.46	1.68	4.55
XLOC_000415	0.12	0.04	0.02	0.08	0	0.05	0	0.17	0.17	0.19	0.23	0.2	0.46	0.4	0.32	0.23	0.06	0.27	0.1	0.19	0.07	0.19	0.08	0.16	0.3	0.11	0.06	0.1	0.15	0.19	0.1	0.11	0.24	0.21	0.07	0.02	0.14	0.06	0.09	0.16	0.23	0.07	0.04	0.05	0.05	0.17	0.1	0.06	0.16
XLOC_000416	0.15	0.22	0.12	0.02	0.07	0.21	0.15	0.44	0.48	0.26	0.22	0.32	0.46	0.88	0.79	0.49	0.2	0.29	0.17	0.22	0.69	0.87	0.8	0.72	0.28	0.3	0.57	0.46	0.37	0.23	0.62	0.14	0.18	0.19	0.34	0.29	0.39	0.54	0.57	0.12	0.14	0.16	0.07	0.14	0.19	0.19	0.33	0.1	0.15
XLOC_000419	0.31	1	0.62	0.39	0.27	0.67	0.36	0.27	0.28	0.06	0.01	0.07	0.01	0.06	0.02	0.02	0.04	0	0	0.05	0.13	0.07	0	0.05	0.03	0	0.08	0	0	0	0.01	0.17	0.12	0.14	0.23	0.05	0.05	0	0	0	0.2	0.08	0.11	0.01	0	0.13	0.02	0.09	0
XLOC_000420	1.14	1.48	1.45	1.31	1.18	1.8	0.96	1.91	0.45	0.53	0.34	0.26	0.19	0.21	0.24	0.52	0.4	1.42	0.85	0.43	2.14	1.05	0.76	1.34	0.24	0.19	0.43	0.21	0.68	0.43	0.33	1.12	0.43	0.56	2.29	1.87	2.08	2.14	1.41	1.1	0.2	0.23	0.4	0.15	0.65	0.72	0.61	0.7	1.81
XLOC_000425	0	0.38	0.17	0.38	0	0.14	0.15	0	0.24	0.21	0.25	0.09	0.22	0.09	0.49	0	0.29	0	0	0.23	0.36	0.2	0.06	0.34	0.5	0	0	0	0.2	0.05	0	0.15	0.06	0.36	0.75	0	0	0	0.65	0	0.09	0.09	0	0.24	0	0.44	0.11	0.16	0
XLOC_000427	0.06	0.45	0.13	0	0.94	0.31	0.06	0.58	0.35	0.22	0.25	0.48	0.36	1.19	0.27	0.17	0.47	0.09	0.49	0.23	0.27	0.36	0.38	0.15	0.17	0.2	0.51	0.25	0.04	0.47	0.1	0.04	0.48	0.13	0.45	0.47	0.83	0.5	0.14	0.34	0.2	0.1	0.17	0.24	0.39	0.25	0.12	0.2	0.14
XLOC_000428	0	0	0	0	0	0	0.07	0	0	0	0	0	0	0	0	0	0.11	0	0.08	0	0	0	0	0	0	0	0	0.51	0	0	0	0	0	0	0	0	0	0	0	0	0	0	0	0	0	0	0	0	0
XLOC_000429	0.04	0	0	0	0	0	0	0	0.11	0	0	0.02	0	0	0.04	0.25	0	0.03	0	0	0	0	0	0.07	0.02	0	0	0	0	0	0.1	0	0	0	0	0	0	0.16	0	0	0	0	0	0	0	0	0	0	0
XLOC_000432	0.09	0.12	0.1	0.21	0	0.08	0	0	0.05	0.05	0.28	0.09	0.02	0	0.05	0.05	0	0	0.22	0.3	0	0.16	0.14	0.23	0.27	0.1	0.4	0.28	0.17	0.05	0	0	0	0.13	0	0	0	0.09	0.1	0.05	0	0	0	0	0.11	0	0.06	0	0.1
XLOC_000436	0.26	0	0.04	0	0	0	0	0.09	0	0	0	0	0	0	0	0.15	0	0	0	0	0	0.06	0	0.04	0	0	0	0	0	0	0	0	0	0.08	0	0.1	0.09	0.75	0	0	0	0	0	0	0	0.16	0	0	0
XLOC_000437	0	0	0	0	0	0	0	0	0.05	0	0.03	0	0.02	0.01	0.01	0	0.95	0.4	0.13	0.8	0.5	0.33	0.35	0.42	0.44	0.36	0.18	0.46	0.47	0.1	0.03	0.15	0.19	0.52	0.02	0.01	0.02	0.01	0.03	0.02	0.12	0.16	0	0.03	0.02	0.01	0.04	0.02	0.56
XLOC_000438	0	0.02	0.02	0	0	0	0	0.03	0.01	0	0.06	0	0	0.01	0.02	0	0.35	0.43	0.11	0.08	0.02	0.02	0.04	0.04	0.39	0.19	0.03	0.08	0	0.03	0	0.03	0.14	0.18	0.05	0	0	0	0	0	0.75	0.65	0.02	0	0.06	0.11	0.2	0.01	0.47
XLOC_000439	0	0	0	0	0	0	0	0	0	0	0	0	0	0	0	0	0.16	0.04	0.06	0	0	0	0	0	0.09	0.09	0	0	0	0.07	0	0	0	0	0	0	0	0	0	0	0.25	0.34	0	0.06	0	0	0.11	0	0
XLOC_000440	0	0	0	0	0	0	0	0	0	0	0	0	0	0	0	0	0.02	0.22	0	0.06	0	0	0.05	0	0.04	0.11	0.04	0.08	0.04	0.02	0.09	0.26	0.19	0.1	0.03	0	0	0	0.07	0	1.97	1.25	0.34	0.05	0.29	0.04	0.18	0.17	0.36
XLOC_000441	0	0	0	0	0	0	0	0	0	0	0	0	0	0	0	0	0	0	0	0	0	0	0	0	0	0.08	0.03	0	0	0	0	0	0.07	0	0	0	0	0	0	0	0.13	0.32	0	0	0	0	0	0.03	0
XLOC_000445	0	0	0.08	0	0	0.03	0	0.13	0	0	0.21	0	0	0	0.04	0.17	0	0	0.11	0.07	0	0	0	0.44	0	0	0.29	0	0	0	0	0.09	0	0	0.21	0	0	0.11	0	0.37	0	0.04	0.04	0	0	0	0	0.35	0
XLOC_000449	0.25	0.17	0.18	0.4	0.68	1.63	0.46	0.67	0.37	0.13	0.03	0	0.07	0	0	0.15	0.04	0.39	0.51	0.31	0.11	0.76	0.15	0.54	0.11	0.93	0.88	0.75	0	0.64	0.3	0.42	0.18	0.05	0.12	0	0.11	0.13	0.07	0.07	0.14	0.34	0.81	0.82	1.12	2.08	0.81	1.19	0.57
XLOC_000450	0.42	0.11	0.87	0.82	1.23	1.9	1.1	1.5	0.2	0.16	0.34	0.29	0.19	0.21	0.06	0.15	0.26	0.48	0.55	0.71	0.53	0.79	0.18	0.52	0.7	0.46	1.05	0.83	0.89	1.41	0.41	0.78	0.46	0.12	0.44	0.5	0.31	0.59	0.19	0.35	0.71	0.28	0.66	0.48	0.75	1.23	0.58	0.94	0.49
XLOC_000451	0.1	0.16	0.03	0.04	0.28	0.08	0.11	0.32	0.11	0.03	0.09	0.11	0.06	0.23	0	0.21	0.03	0.07	0.07	0.26	0.09	0.44	0.08	0.41	0.08	0.01	0.04	0.01	0.04	0.77	0.03	0.25	0.28	0.27	0.2	0.14	0.14	0.1	0.39	0.54	0.08	0.07	0.16	0.25	0.18	0.2	0.06	0.32	0.11
XLOC_000452	0.24	0	0.04	0	0.29	0.23	0	0.11	0.21	0	0	0	0	0	0.1	0.12	0	0.25	0.06	0.06	0.03	0.07	0	0.13	0.13	0	0.08	0	0	0	0	0.04	0	0	0.08	0.06	0.15	0	0	0.07	0.26	0	0.05	0	0	0	0	0	0.34
XLOC_000453	0.2	0.01	0.05	0	0.11	0.01	0.01	0.04	0.04	0.04	0.27	0.01	0.05	0.06	0.02	0.1	0.09	0.18	0.3	0.03	0.07	0.1	0.39	0.2	0.12	0	0.21	0	0.06	0.04	0.46	0.2	0.14	0.15	0.15	0.05	0.07	0.11	0.05	0.11	0.1	0.08	0.19	0.19	0.14	0.09	0.26	0.62	0.05
XLOC_000454	0.37	0.37	0.17	0.15	0.54	0.24	0.38	0.33	0.03	0.22	0.05	0.1	0.02	0	0.05	0.13	0.1	0.07	0.56	0.36	0.04	0	0.44	0.08	0	0	0.08	0.24	0.23	0.41	0.57	0.28	0	0.07	0.04	0.09	0.24	0.19	0.05	0	0.15	0.1	0.59	0.26	0.33	0.08	0.16	0.34	0
XLOC_000460	0.85	1.63	0.64	1.62	0.26	0.5	1.31	0.4	0.6	0.35	0.6	0.24	0.19	0.38	0.4	0.39	0.45	0.31	0.14	0.57	0.32	0.05	0.14	0.31	0.3	0.07	0.13	0.19	0	0.29	0.05	0.52	0.49	0.23	0.38	0.52	0.15	0.32	0.62	0.71	0.44	0.59	0.1	0.02	0.58	0.05	0.36	0.36	0.25
XLOC_000466	0	0	0.09	0	0.03	0	0	0	0.07	0	0.05	0.04	0.07	0.05	0.02	0.12	0.1	0.13	0.39	0.06	0.17	0.12	0.07	0.2	0.19	0.05	0.1	0.05	0.16	0.05	0	0.11	0.21	0	0.12	0.01	0.04	0	0.03	0.08	0.4	0.04	0.19	0.01	0.21	0.03	0.12	0.15	0.33
XLOC_000493	0.11	0	0	0	0	0	0	0	0.12	0	0.03	0	0.03	0	0	0	0.08	0	0	0	0	0	0	0	0.36	0	0	0	0	0	0	0	0	0.08	0.4	0	0.23	0.55	0.12	0.3	0	0	0	0	0	0	0	0	0
XLOC_000494	0	0	0	0	0.11	0	0	0	0.24	0.04	0.37	0	0.04	0.19	0.02	0.07	0.03	0	0.08	0.07	0.03	0	0.42	0.13	0.08	0	0	0	0.02	0.09	0	0	0.08	0	0	0	0.1	0.23	0.09	0.08	0.06	0.02	0.11	0	0.18	0.05	0.08	0	0.08
XLOC_000495	0	0	0	0	0	0	0	0	0.23	0.03	0.04	0.06	0.17	0.07	0.25	0.17	0.06	0.93	0.05	0	0.02	0.1	0.08	0	0.79	0	0	0	0.05	0	0	0.02	0.3	0	0.12	0.03	0	0.05	0	0	0.19	0.03	0	0	0.11	0	0	0	0.18
XLOC_000499	0.06	0.25	0.04	0.31	0.12	0.24	0.11	0.3	0.02	0.03	0.14	0	0	0.1	0.12	0.09	0	0	0.12	0.09	0	0	0.12	0.13	0.02	0.33	0.19	0.16	0.25	0	0	0.15	0.37	0.16	0	0.39	0.05	0.16	0	0.07	0.07	0	0	0.12	0.09	0.02	0	0.19	0.1
XLOC_000507	0	0	0.02	0	0	0	0	0	0.55	0.88	1.61	1.19	1.67	1.68	0.99	0.73	0.26	0.43	0.98	0.07	0.26	0.11	0.05	0.1	0.34	0.16	0.14	0.12	0.03	0.05	0	0.12	0.47	0.65	1.34	0.53	0.79	0.81	0.81	0.78	0.72	0.82	0.23	0.14	0.12	0.16	0.06	0.18	0.33
XLOC_000508	0	0.02	0	0	0	0	0	0	0.13	0.03	0.16	0	0	0	0	0	0.08	0.04	0.11	0.03	0	0	0.04	0.24	0.03	0.09	0.05	0.03	0.22	0	0	0.3	0.04	0.14	0	0.08	0	0.03	0	0	0.02	0.06	0	0.1	0	0.07	0	0	0.09
XLOC_000511	0.29	0.35	0.42	0.46	0.64	0.6	0.54	0.55	0.47	0.4	1.33	0.42	0.31	0.33	0.75	0.63	0.47	1.29	1.36	1.1	0.96	0.97	0.9	0.47	1.35	2.12	0.88	0.97	0.5	1.11	1.21	0.89	1.74	1.13	1.67	0.53	0.53	1.62	0.38	0.49	0.74	0.76	0.86	0.99	1.32	1.29	1.95	1.23	1.81
XLOC_000517	0.15	0.03	0.04	0	0	0	0.13	0.04	0.06	0	0.1	0	0	0	0.05	0.03	0.03	0.04	0	0	0	0.06	0.08	0.08	0	0.21	0	0	0.06	0.17	0.03	0	0	0	0	0	0	0.25	0.11	0	0.16	0.29	0.25	0.02	0	0.03	0.17	0.5	0
XLOC_000522	0.38	0.36	0.38	0.05	0.2	0.59	0.16	0.05	0.29	0.06	0.29	0.03	0.64	0.72	0.51	0.27	0.25	0.02	0.03	0.14	0.08	0.18	0.05	0.15	0.41	0.63	0.13	0.61	0.11	0.49	0	0.18	0.26	0.52	0.36	0.14	0.18	0.12	0.51	0	0.94	0.55	0.31	0.54	0.21	0.05	0.2	0.58	0.17
XLOC_000525	0	0	0	0.18	0	0	0	0	0	0	0.07	0	0	0	0	0	0	0	0.14	0	0	0.06	0	0	0.03	0	0.51	0	0	0	0	0.03	0	0	0.09	0	0	0	0	0	0	0	0	0	0	0	0	0	0
XLOC_000530	0.04	0	0	0.03	0.05	0.11	0.1	0.08	0	0.03	0.16	0	0.02	0.06	0.18	0.02	0	0.03	0	0	0.02	0.04	0.09	0.03	0	0	0	0	0	0.16	0.08	0	0.12	0	0.34	0	0.03	0.04	0.04	0	0.02	0	0.01	0.02	0.03	0.06	0.02	0	0
XLOC_000531	0.77	0.31	0.88	0.97	1.43	1.39	0.21	1.08	0.22	0.85	0.32	0.24	0.17	0	0.59	0.49	0.44	0.59	0.62	0.3	0.28	0.37	0.37	0.46	0.17	0.13	0	0.28	0.53	0.82	1.36	0.42	0.89	0.85	1.58	0.9	1.85	2.3	0.8	1.64	0.89	0.63	1.42	1.7	1.09	0.51	0.36	0.52	0.17
XLOC_000532	0.37	0.66	0.27	0.23	0.15	0.52	0.4	0.48	0.16	0.13	0.13	0.16	0.15	0.22	0.16	0.31	0.12	0.13	0.1	0.11	0	0.09	0.11	0.25	0.28	0.3	0.09	0.02	0.04	0.22	0.09	0.12	0.26	0.17	0.08	0.36	0.14	0.7	0.3	0.82	0.16	0.1	0.13	0.14	0.13	0.2	0.16	0.26	0.09
XLOC_000539	0.16	0	0	0.06	0	0	0	0.11	0.09	0.08	0.04	0.11	0.07	0.02	0.45	0	0.2	0.03	0.04	0	0.29	0.2	0.1	0.1	0.02	0	0.16	0.08	0.13	0.14	0.02	0.15	0.03	0.03	0	0	0.1	0.08	0.09	0.18	0.11	0.24	0	0.24	0.31	0.15	0.19	0.05	0.09
XLOC_000540	0	0	0	0	0	0	0	0	0.11	0.02	0.33	0.04	0	0.13	0.02	0.04	0.24	0.12	0	0.07	0.07	0	0.12	0.06	0.08	0.19	0.02	0	0	0.05	0	0.14	0.3	0.03	0.14	0.15	0.07	0	0	0.09	0	0.25	0.3	0	0	0	0.05	0	0.3
XLOC_000543	0	0	0.21	0.05	0.06	0	0.05	0	0	0	0.06	0	0	0	0	0.03	0.04	0	0	0	0	0.14	0.05	0.05	0	0	0	0.09	0.11	0	0	0	0	0.34	0	0	0	0	0	0	0	0	0.03	0.32	0.24	0	0.35	0	0.07
XLOC_000550	0.3	0.12	0.25	0	0.04	0.07	0.08	0.04	0.3	0.23	0.4	0.73	0.05	0.27	0.43	0.45	0.03	0.1	0.09	0.25	0.55	0.31	0.07	0.11	0.24	0.07	0.1	0.04	0.32	0.21	0.81	0.11	0.37	0.99	0.93	0.67	0.3	0.85	0.35	0.53	0.14	0.05	0.22	0.11	0.05	0.05	0.26	0.03	0.19
XLOC_000554	0.23	0.4	0.35	0.72	0.38	0.34	0.31	0.21	0.67	0.64	0.81	1.21	1.85	1.58	1.03	0.6	0.81	0.54	0.45	0.3	0.21	0.25	0.25	0.51	0.65	0.63	0.42	0.39	0.29	0.43	0.13	0.25	0.92	1.09	0.31	1.27	0.96	0.94	0.57	0.41	0.53	0.48	0.15	0.1	0.25	0.03	0.39	0.19	0.61
XLOC_000555	0.05	0.14	0.33	0.47	0.3	0.1	0.62	0.35	0.19	0.33	0.12	0.55	0.72	0.56	0.71	0.53	0.41	0.16	0.13	0.11	0.04	0.02	0.14	0.26	0.17	0.9	0.16	0.27	0.01	0.18	0.07	0.16	0.75	0.79	0.13	0.51	0.53	0.4	0.57	0.43	0	0.44	0.05	0.28	0.02	0.06	0.14	0.05	0.18
XLOC_000556	0.23	0.1	0.03	0.06	0.04	0	0.21	0.17	0.2	0.2	0.06	0.22	0.31	0.28	0.06	0	0.11	0.12	0.2	0.23	0.39	0.33	0.52	0.1	0.09	0	0.22	0.42	0.17	0.12	0.29	0	0.08	0.03	0.22	0.26	0.23	0.04	0.27	0.35	0.32	0	0.13	0.12	0.05	0.05	0.05	0	0
XLOC_000557	0	0.29	0.44	0.24	0.36	0.11	0.34	0.33	0.15	0.42	0.06	0	0.37	0.31	0.38	0.43	0.04	0	0.06	0.06	0.06	0	0.15	0	0.14	0.1	0.42	0.16	0.42	0.41	0.6	0.53	0.45	1.14	0.52	0.06	0.32	1.21	0.72	0.7	0.03	0.17	0.07	0.12	0.92	0.19	0.29	0.59	0.07
XLOC_000560	0.6	0.57	0.29	0.79	0.56	0.76	0.2	0.31	0.22	0.21	0.2	0.3	0.32	0.16	0.3	0.16	0.18	0.07	0	0.4	0.03	0.19	0.1	0.03	0.09	0.03	0.6	0.24	0.08	0.21	0.25	0.13	0.18	0.21	0.32	0.06	0.3	0.1	0.15	0.18	0.03	0.24	0.21	0.11	0.07	0.02	0.06	0.02	0.07
XLOC_000561	0.79	0.2	0.18	0.23	0.25	0.36	0.54	0.52	0.56	0.44	0.2	0.53	0.11	0.28	0.16	0.48	0.21	0.19	0.38	0.2	0.53	0.3	0.37	0.18	0.33	0.16	0.4	0.35	0.13	0.02	0.11	0.28	0.03	0.06	0	0.69	0.32	0.09	0.29	0.47	0.67	0.64	0.4	0.4	0.74	0.13	0.6	0.31	0.19
XLOC_000562	0.06	0.21	0.14	0	0.06	0.11	0.29	0.06	0.04	0	0	0.03	0	0	0.03	0	0	0	0	0.06	0.06	0	0	0	0	0.28	0.07	0.07	0	0	0	0	0	0.14	0.06	0	0	0	0	0	0	0.21	0.39	1.04	0.3	0.38	0.17	0	0
XLOC_000567	0	0	0	0	0	0	0	0	0	0	0	0	0	0	0	0	0	0	0	0	0.2	0	0	0	0.49	0	0.04	0.04	0	0	0.12	0	0	0	0	0	0	0	0.08	0	0	0	0	0	0	0	0	0	0.08
XLOC_000568	0	0	0	0	0	0	0	0	0.01	0.03	0.04	0.03	0.09	0.08	0.02	0.07	0.11	0.27	0.04	0	0.04	0.02	0.05	0	0	0.04	0	0	0	0	0	0	0.01	0	0.02	0	0.12	0	0	0	0	0.06	0	0	0	0	0	0	0.15
XLOC_000569	0.02	0	0.09	0	0.06	0.07	0	0	0.08	0.01	0.19	0.17	0.06	0.22	0.22	0.2	0.04	0.17	0.04	0.1	0.28	0.13	0.05	0.11	0.05	0.11	0.28	0.03	0	0.09	0	0.09	0.03	0	0.33	0.42	0	0.23	0.17	0.33	0.23	0.1	0.23	0.04	0.12	0.15	0.06	0.31	0.05
XLOC_000570	0.07	0	0.85	0.23	0	0	0	0.2	0	0.15	0	0.31	0	0.21	0.28	0.13	0.05	0	0	0.07	0.07	0	0	0.25	0	0.08	0	0	0.09	0	0.04	0	0	0.05	0.14	0.07	0.13	0.23	0.26	0	0	0	0.49	0.41	0	0.13	0	0	0.08
XLOC_000571	0.06	0	0	0	0	0.15	0	0.15	0.17	0.06	0	0	0.06	0	0.13	0.2	0.04	0.09	0	0	0	0	0	0.05	0.39	0.1	0	0	0	0.03	0	0.04	0.17	0.09	0.16	0.11	0	0.24	0.07	0.13	0.13	0	0.13	0	0.21	0.07	0.2	0	0
XLOC_000572	0	0	0	0	0	0	0	0	0	0.06	0.06	0.12	0	0	0.07	0.03	0.46	0.64	0.24	0.23	0	0.14	0	0.1	0.46	0.29	0.13	0.28	0.11	0.04	0.06	0.14	0.47	0.13	0.22	0	0	0.12	0.07	0	0	0.16	0	0	0	0	0	0.16	0.6
XLOC_000574	0.02	0.04	0.11	0.01	0.01	0.01	0.01	0	1.63	1.61	2.26	1.4	1.19	0.81	1.67	1.65	1.4	1.48	1.46	1.22	0.71	0.72	1.5	1.01	1.45	1.45	2.05	1.32	0.9	0.82	1.09	0.73	1.07	1.13	1.19	1.02	0.87	0.77	1.82	1.03	0.65	0.9	0.9	0.51	0.63	0.27	0.79	0.58	1.16
XLOC_000575	0	0	0	0	0	0.12	0.08	0	0.75	0.58	0.15	0.12	0.28	0.24	0.72	0.21	0.81	0.65	0.4	0.3	0.39	0.55	0.25	0.25	0.84	0.98	0.1	0.26	0.56	0.48	0.52	0.28	0.7	0.93	0.25	0.32	0.34	0.36	0.55	0.14	0.29	0.52	0.25	0.17	0.43	0.05	0.18	0.06	0.77
XLOC_000577	0	0	0	0	0	0	0	0	0	0	0	0	0	0	0.21	0.04	0	0	0	0	0	0	0	0	0	0.7	0	0	0.47	0	0	0.05	0	0	0	0	0	0	0.09	0	0	0.04	0	0	0.09	0	0	0	0
XLOC_000578	0	0	0.01	0	0	0	0	0	0.02	0	0.03	0	0.01	0.01	0	0	1.34	2.2	2.29	1.68	1.52	1.4	0.58	1.57	3.36	2.01	3.31	2.72	2.59	1.99	1.92	3.4	0.67	0.39	0.24	0	0	0.03	0.05	0.01	0.27	0.4	1.11	1.36	0.35	0.45	0.11	0.63	3.05
XLOC_000580	0	0	0	0	0	0	0	0	0	0	0	0	0	0	0	0	0	0.05	0.07	0	0	0.08	0.42	0	0	0.11	0	0	0.25	0	0.14	0.08	0	0.05	0	0	0	0	0	0	0.11	0	0	0.17	0	0	0	0	0
XLOC_000581	0.83	0.08	0.38	0.05	0.06	0.05	0.38	0.26	0.28	0.37	0.37	0.41	0.06	0.03	0.33	0.27	0.34	0.09	0.48	0.46	0.05	0.29	0.14	0.66	0.27	0	0.47	0.25	0	0.04	0.32	0.25	0	0.09	0.28	0.41	0	0.43	0.34	0.67	0.33	0.42	0.27	0.66	0.39	0.54	0.4	0.89	0.2
XLOC_000582	0.3	0	0.16	0	0	0.06	0.07	0.33	0.44	0.08	0	0.32	0.12	0.25	0.42	0.13	0.21	0.29	0.08	0	0	0.37	0.18	0.06	0.21	0	0	0.04	0.09	0	0	0.14	0.22	0.45	0.14	0	0.06	0.08	0.17	0.25	0.33	0.16	0.21	0.04	0.62	0.59	0.2	0.15	0.59
XLOC_000583	0.45	0.29	0.15	0.25	0.25	0.18	0.27	0.29	0.3	0.28	0.2	0.22	0.47	0.4	0.43	0.12	0.54	0.36	0.35	0.27	0.19	0.29	0.22	0.04	0.38	0.56	0.09	0.2	0.26	0.08	0.19	0.13	0.23	0.56	0	0.12	0.16	0.41	0.4	0.08	0.62	1.58	0.51	0.23	0.72	0.46	0.82	0.13	0.49
XLOC_000584	0	0	0.11	0	0	0	0	0.07	0.1	0.3	0.25	0.1	0	0.04	0.02	0.11	0.14	0.06	0.17	0.25	0.21	0.2	0.33	0.61	0.04	0.06	0.18	0.19	0.22	0.47	0.15	0.78	0.37	0.08	0.55	0.33	0.2	0.17	0.71	0.4	0.06	0.23	0.07	0.18	0.27	0.06	0.11	0.2	0.07
XLOC_000586	0	0.05	0.03	0	0	0.13	0	0	0.11	0.12	0.17	0.43	0.22	0.71	0.53	0.22	0.21	0.14	0	0.18	0.07	0.27	0.33	0.25	0.15	0.16	0.08	0.1	0	0.44	0	0.02	0.05	0.19	0.21	0.33	0.16	0.88	0.34	0.08	0.14	0.18	0.1	0.19	0.15	0.67	0.13	0	0.34
XLOC_000591	0	0	0	0	0	0	0	0	0	0.07	0.11	0.03	0	0	0	0.02	0.24	0.19	0.14	0.35	0.17	0.27	0.26	0.02	0.08	0	0.06	0.2	0.07	0.44	0.04	0.24	0.26	0.04	0.05	0	0	0.06	0	0.06	0	0	0	0.03	0.07	0	0	0.09	0.03
XLOC_000597	0.35	0.26	0.05	0.05	0.28	0.08	0.61	0.08	0.06	0	0.07	0.05	0.26	0.18	0.16	0.4	0.16	0.02	0.1	0	0.4	0.23	0.2	0.19	0.21	0.05	0.09	0.07	0.28	0	0	0.17	0.02	0.14	0.09	0	0.16	0.23	0.11	0.11	0.07	0.09	0.02	0	0.32	0.08	0.21	0.02	0.11
XLOC_000599	0	0.04	0	0	0	0	0.11	0.11	0.03	0	0	0	0.1	0	0	0.27	0.04	0	0	0	0	0	0	0	0	0	0.37	0	0	0	0	0	0	0	0	0	0	0	0	0	0	0.07	0	0	0.04	0	0	0	0
XLOC_000600	0	0	0	0	0	0	0	0	0	0.02	0	0	0	0	0.02	0	0.31	0.12	0	0.04	0.11	0	0.03	0.07	0	0	0.02	0.02	0.22	0	0	0	0.11	0.14	0	0	0	0	0.05	0	0	0.02	0.2	0	0	0	0	0	0
XLOC_000605	0.12	0.02	0	0.04	0.09	0.12	0	0	0.03	0.25	0.11	0.1	0.01	0.04	0.01	0.07	0.15	0.07	0.17	0	0	0.06	0.08	0.06	0.07	0.25	0.09	0.77	0	0.11	0.06	0	0.22	0.18	0.07	0	0.02	0	0.06	0	0.14	0	0.11	0	0.03	0.03	0	0.05	0.05
XLOC_000606	0.11	0.4	0.29	0.47	0.4	0.1	0.14	0.03	0.15	0.47	0.23	0.37	0.16	0.17	0.33	0.13	0	0.17	0.15	0.18	0.13	0.04	0.26	0.1	0.25	0	0.33	0.08	0.07	0.33	0.26	0.27	0.21	0.58	0.52	0.29	0.13	0.34	0.04	0.58	0	0.28	0.6	0.11	0.04	0.13	0	0.35	0
XLOC_000611	0.2	0.11	0.12	0.23	0.1	0.14	0.27	0.7	0	0.03	0.05	0.17	0.21	0.41	0.16	0.04	0.14	0.03	0.64	0.23	0.18	0	0.08	0.06	0.2	0.11	0.09	0.02	0.23	0	0.04	0.3	0.14	0.34	0.22	0.1	0	0.03	0.15	0.11	0.13	0.18	0.41	0.05	0.04	0.12	0.2	0.36	0.07
XLOC_000614	0	0.04	0.04	0.04	0.21	0	0.05	0.05	0.09	0.19	0.14	0	0.2	0.03	0.09	0.31	0.26	0	0.21	0.46	0.05	0	0.29	0.14	0	0	0.24	0.16	0	0	0.23	0.06	0	0.12	0.49	0.15	0.23	0.05	0.06	0	0	0.14	0.18	0.03	0.09	0	0.36	0.32	0
XLOC_000615	0	0	0	0	0	0	0.07	0	0	0	0	0.13	0.09	0.13	0.04	0.14	0	0	0	0	0.07	0	0	0	0	0	0.04	0	0.1	0.1	0	0	0.06	0.12	0.15	0.16	0	0	0	0.09	0	0	0.18	0.16	0	0	0.16	0.81	0
XLOC_000618	0	0	0	0	0	0	0	0	0.04	0	0	0	0	0	0.81	0.04	0	0	0	0	0	0	0	0	0	0	0	0	0	0	0.07	0	0	0	0	0	0	0	1.63	0.29	0	0	0	0	0	0	0.48	0	0
XLOC_000621	0.23	0	0.06	0.16	0.03	0.06	0.16	0.09	0.72	0.13	0.24	0.24	0.07	0.42	0.39	0.35	0.19	0.54	0.33	0.28	0.06	0.15	0.39	0.43	0.67	0.27	0.29	0.26	0.2	0.26	0.19	0.25	0.46	0.16	0.16	0.23	0.04	0.19	0.21	0.17	0.35	0.15	0.57	0.33	0.11	0.2	0.37	0.42	0.45
XLOC_000622	0.08	0.02	0.04	0.08	0	0	0	0.05	0.44	0.08	0.17	0.01	0.01	0.1	0.01	0.07	0.04	0.32	0.29	0.05	0.12	0.09	0.1	0.18	0.03	0.07	0.06	0.03	0.06	0.14	0.14	0.05	0.24	0.08	0.12	0.4	0	0.21	0.03	0.03	0.53	0.23	0.06	0.26	0.03	0.08	0.11	0.16	0.17
XLOC_000623	0.12	0	0.09	0	0	0	0	0.07	0.05	0	0.04	0.09	0.07	0.11	0.07	0.16	0.06	0.19	0	0.16	0.07	0.1	0.03	0	0.27	0	0.27	0.23	0.13	0.02	0.02	0.3	0.38	0.06	0.11	0	0	0	0.09	0	0.18	0.02	0.34	0.41	0.02	0	0.05	0.25	0.23
XLOC_000630	0	0	0	0.58	0.03	0	0	0	0	0	0	0	0	0	0	0	0	0	0	0	0	0	0	0	0	0	0	0	0	0	0	0	0	0	0	0	0	0	0	0	0	0	0	0.02	0	0	0	0	0
XLOC_000631	0.15	0.12	0.15	0.05	0.3	0.08	0.11	0.09	0.13	0.02	0.04	0.22	0.06	0.28	0.13	0.15	0.25	0.14	0.24	0.44	0.25	0.32	0.24	0.28	0.21	0.07	0.19	0.29	0.12	0.13	0.35	0.15	0.31	0.17	0.1	0.27	0.05	0	0.12	0.16	0.33	0.45	0.4	0.45	0.24	0.22	0.51	0.46	0.25
XLOC_000633	0.08	0	0	0	0.16	0.07	0	0	0	0.19	0.06	0.15	0	0	0.05	0	0	0.06	0	0	0	0	0.13	0.11	0.02	0	0.05	0	0	0.05	0.22	0.08	0.03	0	0	0	0	0.17	0.29	0	0	0.11	0	0.1	0.02	0.1	0.2	0.28	0
XLOC_000637	0.16	0	0.03	0.06	0	0	0	0.1	0.07	0	0.08	0.19	0.04	0.07	0.04	0.2	0	0.12	0.08	0.08	0.04	0.05	0.06	0.03	0.13	0.11	0.11	0	0.05	0.09	0	0.43	0	0.09	0.07	0.12	0.1	0	0	0.22	0	0.09	0	0.04	0.02	0	0.08	0.11	0.18
XLOC_000639	0.1	0.12	0	0	0.08	0.11	0	0	0.03	0.15	0.11	0.01	0.13	0.06	0.35	0.11	0	0.02	0	0	0.12	0.29	0.17	0.04	0.01	0	0	0	0	0.16	0.65	0.18	0.08	0.08	0.15	0.31	0.38	1.92	0.52	0.8	0	0	0	0.07	0.02	0.38	0.07	0.43	0.06
XLOC_000641	0	0	0.02	0	0	0	0	0	0.19	0.17	0.07	0.19	0.04	0	0.06	0.22	0.1	0.13	0.03	0.16	0.18	0.07	0	0.09	0	0.02	0.34	0.01	0.17	0	0	0	0.26	0.23	0.39	0.24	0.26	0.29	0.13	0.31	0.05	0.05	0	0.01	0	0	0	0.04	0.06
XLOC_000646	0.14	0	0.08	0.11	0.22	0.02	0.2	0.19	0.1	0.12	0.03	0	0.12	0	0.03	0.03	0.2	0.06	0.11	0.05	0.17	0.2	0.07	0.24	0.23	0.15	0.14	0.4	0	0.03	0	0.03	0.04	0.04	0.1	0.19	0	0.11	0	0	0.23	0.06	0.39	0.08	0.28	0.2	0.43	0.24	0.03
XLOC_000652	0.25	0.17	0.09	0.1	0.13	0.08	0.16	0.08	0.12	0.12	0.13	0.18	0.11	0.12	0.22	0.23	0.17	0.23	0.18	0.23	0.08	0.09	0.45	0.19	0.25	0.17	0.32	0.17	0.16	0.2	0.22	0.26	0.16	0.37	0.38	0.37	0.11	0.33	0.21	0.36	0.16	0.19	0.28	0.17	0.15	0.14	0.15	0.18	0.25
XLOC_000653	0.97	0.77	0.21	0.3	0.25	0	0.12	0.34	0.05	0.53	0.66	0.13	0.14	0.64	0.07	0.39	0.06	0.26	0.34	0.08	0.08	0.15	0.03	0.07	0.47	0.05	0.4	0.22	0.39	0.3	0.02	0.21	0.43	0.78	0.91	0.66	0.25	0.61	0.29	1.09	0.07	0.16	0.05	0.06	0.37	0.18	0	0.77	0.33
XLOC_000657	0.2	0.08	0.05	0.01	0.22	0.01	0.09	0.09	0.31	0.24	0.24	0.14	0.17	0.15	0.08	0.22	0.17	0.13	0.15	0.18	0.11	0.08	0.12	0.16	0.18	0.07	0.12	0.13	0.34	0.14	0.17	0.29	0.09	0.11	0.3	0.1	0.15	0.11	0.06	0	0.23	0.25	0.18	0.18	0.14	0.31	0.1	0.23	0.12
XLOC_000659	0	0	0	0	0	0	0	0	0	0.36	0	0.14	0	0	0	0	0	0	0	0	0.06	0	0	0.12	0	0	0	0	0.34	0	0	0	0	0	0	0	0	0.42	0	0	0	0	0	0	0	0	0	0	0
XLOC_000669	0	0	0	0	0	0	0	0	0.04	0.09	0.11	0.07	0.01	0.06	0.04	0.01	0.65	0.68	0.63	0.25	0.15	0.38	0.29	0.11	0.5	0.69	0.34	0.22	0.15	0.22	0.28	0.16	0.33	0.48	0.02	0.04	0.02	0.15	0.01	0.05	0.58	0.71	0.47	0.39	0.31	0.2	0.07	0.06	0.66
XLOC_000670	0.12	0.04	0.13	0.18	0.14	0.13	0.11	0.05	0.05	0.2	0.38	0.46	0.22	0.18	0.32	0.24	0.12	0.04	0.09	0.2	0.26	0.04	0.3	0.2	0.02	0.19	0.02	0.14	0.27	0.07	0.16	0.07	0.08	0	0.3	0.77	0.15	0.21	0.44	0.72	0.16	0.05	0.33	0.37	0.07	0.05	0.16	0	0.07
XLOC_000672	0.11	0.45	0	0	0	0.1	0	0	0.1	1.07	0.09	0.03	0.06	0.03	0.09	0.06	0.75	0	0.17	0.32	0.15	0	0	0	0.15	0.88	0.25	0	0	0.03	0	0	0	0.33	0.31	0	0	0.06	0.38	0	0.4	0.03	0	0	0	0.07	0.37	0	0.12
XLOC_000673	2.85	4.21	2.44	4.68	3.02	4.78	3.18	3.65	0.04	0.14	0.06	0.16	0.16	0.14	0.14	0.04	0.02	0.19	0.25	0.07	0.04	0.24	0.06	0	0	0.07	0.1	0.19	0.23	0.23	0.29	0.12	0.14	0	0.34	0.34	0.25	0.38	0.2	0.19	0.07	0.05	0.21	0	0.2	0.15	0.1	0	0.11
XLOC_000675	0.42	0.78	0.53	0.91	0.31	0.72	0.8	0.87	0.1	0.02	0.13	0.28	0.09	0.08	0.04	0.06	0.1	0	0	0.07	0.09	0.13	0.11	0	0.02	0	0.24	0.35	0.04	0.06	0.21	0.13	0.2	0	0	0	0.09	0.22	0	0	0.02	0.1	0.08	0.05	0.41	0.08	0.19	0.17	0.08
XLOC_000677	0.05	0.1	0.18	0.22	0.15	0.52	0.07	0.27	0.06	0.08	0.14	0.08	0.01	0.03	0.04	0.06	0	0.02	0	0.1	0.02	0.03	0.02	0.02	0.09	0	0.03	0.07	0.11	0	0	0	0	0	0.02	0.05	0.02	0.05	0.06	0.03	0.03	0.01	0.11	0.03	0.1	0	0.02	0.07	0
XLOC_000678	0	0.07	0.29	0.63	0.43	0.22	0.87	0.32	0	0	0.04	0	0	0.02	0.1	0	0.05	0	0.04	0	0.07	0	0.03	0.09	0	0	0.08	0.08	0.11	0.11	0.24	0.13	0	0	0.07	0.29	0.13	0.04	0.08	0	0	0	0.31	0.13	0.35	0.13	0	0.35	0.08
XLOC_000679	0	0	0.01	0.01	0	0.03	0	0.01	0.43	0.55	0.41	0.31	0.38	0.45	0.57	0.43	0.71	0.68	0.33	0.46	0.21	0.48	0.45	0.51	0.72	0.92	0.26	0.45	0.41	0.38	0.22	0.18	0.46	0.53	0.33	0.57	0.5	0.67	0.61	0.61	0.49	0.37	0.08	0.08	0.11	0.14	0.2	0.09	0.61
XLOC_000681	0.66	0.51	0.61	0.53	0.42	0.51	0.24	0.42	0.24	0.26	0.49	0.26	0.12	0.11	0.13	0.11	0.16	0.2	0.23	0.21	0.16	0.04	0.02	0.13	0.27	0.08	0.21	0.26	0.19	0.18	0.12	0.08	0.01	0.12	0.28	0.32	0.19	0.13	0.14	0.18	0.29	0.1	0.34	0.19	0.14	0.2	0.33	0.16	0.04
XLOC_000682	0.2	0.21	0.26	0.14	0.35	0.14	0.22	0.16	0.01	0.14	0.49	0.14	0.13	0.08	0.13	0.15	0.03	0.15	0.24	0.17	0.14	0.02	0.13	0.14	0.13	0.2	0.04	0.1	0.35	0.05	0.12	0.29	0.07	0.09	0.17	0.12	0.19	0.14	0.23	0.2	0.15	0.24	0.3	0.27	0.23	0.36	0.3	0.19	0.22
XLOC_000685	0	0	0	0	0	0	0.13	0	0	0	0.21	0	0	0	0	0.12	0.1	0	0.14	0	0	0	0	0.12	0	0	0	0	0	0	0	0	0	0	0	0	0	0.07	0.08	0	0	0	0	0	0	0	0	0	0
XLOC_000688	0	0.19	0.05	0.39	0.41	0.42	0.19	1.54	0	0	0.04	0.04	0.15	0	0.08	0.28	0.2	0.7	0.71	0.61	1.71	0.76	0.39	0.48	0.08	0	0.59	0.8	0.04	0.17	0.15	0.39	0.1	0.1	0	0.27	0	0.22	0.08	0	0.27	0.11	0.51	0.04	0.74	0.08	0.85	0.9	0.39
XLOC_000691	0.56	0.58	0.1	0.33	0.28	0.28	0.22	0.26	0.79	0.83	1.24	0.86	1.32	1.29	1.19	1.1	2.28	1.84	1.22	1.07	0.91	0.92	0.67	0.89	1.58	1.43	0.7	0.75	0.49	0.65	0.61	0.45	0.79	0.79	1.17	0.84	1.4	0.9	1.42	0.84	0.65	0.77	0.6	0.32	0.22	0.34	0.28	0.24	1.41
XLOC_000692	0.1	0.07	0.29	0	0	0	0.03	0.06	0.26	0.18	0.05	0.2	0.07	0.15	0.09	0	0.1	0.05	0.21	0.1	0.21	0.12	0.11	0.09	0	0.17	0.19	0.47	0.27	0	0	0.29	0.05	0.18	0.06	0.07	0.12	0.24	0.04	0	0.22	0.15	0.11	0.12	0.14	0.16	0.16	0.14	0
XLOC_000693	0	0	0	0	0	0	0	0	0.26	0.18	0.48	0.25	0.21	0.11	0.15	0.21	0.05	0.03	0.12	0.14	0.03	0.05	0.03	0.04	0.08	0.05	0.02	0.07	0	0	0	0	0.02	0	0.1	0.09	0.11	0.05	0.07	0.1	0	0	0	0	0	0	0	0	0.03
XLOC_000697	0.04	0.3	0.04	0.14	0.25	0.14	0.24	0.06	0.01	0.35	0	0.07	0.21	0.15	0.26	0.06	0.02	0	0	0.01	0.1	0.09	0.05	0	0	0	0	0	0.19	0.17	0.19	0.01	0.17	0.31	0.09	0.33	0.58	0.8	0.62	0.6	0.02	0.03	0	0.03	0.13	0.12	0.12	0.03	0.01
XLOC_000698	0.11	0.11	0.03	0.02	0.4	0.18	0.17	0.36	0.17	0.3	0.32	0.41	0.2	0.12	0.49	0.26	0	0.09	0.02	0.07	0.14	0.06	0.14	0.08	0.1	0.02	0.29	0.15	0.2	0.27	0.39	0.56	0.46	0.35	1.25	0.86	1.17	1.01	0.84	1.61	0.05	0.1	0.24	0.53	0.38	0.38	0.28	0.58	0.05
XLOC_000699	0.1	0.06	0.09	0.05	0.03	0.07	0.14	0.52	0.06	0.12	0.3	0.12	0.11	0.09	0.57	0.46	0	0	0.11	0.07	0.02	0.04	0	0.19	0.08	0.08	0.17	0.19	0.01	0.25	0.36	0.26	0.53	0.39	0.44	0.41	0.55	0.97	0.7	1.37	0	0.1	0.13	0.11	0.38	0.09	0.33	0.25	0.02
XLOC_000703	0.31	0.18	0.22	0.17	0.14	0.26	0.3	0.25	0.06	0.1	0.05	0.15	0.13	0.2	0.26	0.03	0.15	0.09	0.12	0.05	0.09	0.03	0.07	0.14	0.12	0.03	0.28	0.23	0.04	0.31	0.03	0.25	0.19	0.03	0.15	0.3	0.14	0.68	0.22	0.08	0.38	0.13	0.09	0.31	0.14	0.11	0.19	0.37	0.11
XLOC_000706	0	0	0	0	0	0	0	0	0	0.27	0	0	0.04	0.18	0.07	0	0	0	0	0	0.06	0.08	0	0	0	0	0.22	0.03	0	0	0	0	0	0	0	0.13	0	0	0	0	0.25	0	0.04	0.13	0	0	0	0	0
XLOC_000713	1.1	0.2	0.4	0.95	0.44	0.35	1.15	0.98	1.5	1.66	0.89	0.88	0.95	0.77	1.06	1.13	0.43	1.08	0.56	1.03	2.32	2.01	2.04	0.95	2.48	0.83	1.81	1.36	1.72	2.04	1.35	1.6	2.65	1.52	2.86	2.6	1.56	3.58	2.39	2.89	0.97	0.8	0.25	2.03	1.78	1.72	3.17	1.46	1.25
XLOC_000714	0.16	0.32	0.05	0	0	0.02	0.02	0.14	0.18	0.33	0.7	0.77	1.45	1.17	0.35	0.36	0.22	0.28	0.63	0.26	0.22	0.16	0.32	0.57	0.21	0.34	0.66	0.22	0.39	0.16	0.06	0.18	0.15	0.23	0.75	0.31	0.29	0.3	0.16	0.1	0.41	0.34	0.59	0.25	0.75	0.54	0.2	0.85	0.2
XLOC_000715	0.05	0.08	0.09	0	0	0.04	0	0.02	0.19	0.16	0.18	0.48	1	0.65	0.19	0.4	0.22	0.13	0.31	0.13	0.23	0.24	0.13	0.22	0.07	0.2	0.09	0.01	0.05	0.35	0.04	0.15	0.05	0.08	0.12	0.09	0.14	0.04	0.06	0.07	0.14	0.26	0.38	0.12	0.2	0.11	0	0.36	0.07
XLOC_000718	0	0.1	0	0	0	0	0	0.07	0.07	0.1	0.04	0	0.17	0.04	0	0.04	0.08	0.06	0.08	0.04	0	0	0.09	0.1	0	0.25	0	0	0	0.3	0.04	0	0	0.03	0.07	0	0.1	0	0.13	0.17	0	0.08	0	0	0	0.09	0	0.08	0.09
XLOC_000720	0.1	0.18	0.25	0.17	0.48	0.11	0.14	0.39	0.27	0.59	0.47	0.22	0.2	0.25	0.16	0.28	0.19	0.27	0.3	0.24	0	0.24	0.45	0.19	0.48	0.11	0.26	0.24	0	0.04	0.38	0.23	0.21	0.22	0.39	0.26	0.51	0.38	0.54	0.72	0.16	0.26	0.48	0.32	0.29	0.27	0.47	0.18	0.42
XLOC_000725	0	0	0	0	0	0	0	0	0.03	0.02	0.11	0	0	0	0	0	0.03	0	0	0	0.2	0	0.07	0	0.25	0	0.07	0	0	0	0.19	0	0.73	0.23	0	0	0	0	0	0	0	0.14	0.02	0.07	0	0	0.06	0	0
XLOC_000726	0.05	0.03	0.04	0.04	0	0.04	0	0	0	0.05	0	0	0	0	0	0	0.07	0	0	0	0	0.03	0	0	0	0	0	0	0	0	0	0	0.15	0	0	0	0	0.16	0	0	0	0	0	0	0	0	0	0	0
XLOC_000727	0	0	0	0.03	0	0.03	0	0	0	0	0.07	0	0	0	0	0	0.13	0	0.07	0	0	0.04	0	0	0	0.12	0	0	0	0	0	0.18	0.18	0	0	0.14	0.03	0.04	0	0	0	0	0	0	0.08	0	0	0	0
XLOC_000728	0	0	0	0	0	0	0	0	0	0	0.12	0	0	0	0	0	0	0	0	0	0	0	0.18	0	0	0	0	0	0	0	0	0	0.17	0.52	0.22	4.16	0	0.08	0	0	0	0	0	0.08	0	0	0	0	0.17
XLOC_000729	0	0.01	0.01	0.01	0.04	0	0.02	0	0.24	0.2	0.08	0.22	0.22	0.08	0.11	0.15	0.1	0.1	0.04	0.09	0.19	0.15	0.05	0.07	0.1	0.03	0.14	0.09	0.08	0.14	0	0.03	0.12	0.08	0.13	0.07	0.14	0.04	0.07	0.11	0.01	0.06	0	0	0.02	0	0	0.07	0.08
XLOC_000730	0.11	0.02	0.04	0	0.11	0	0.2	0	0.02	0.18	0.03	0	0.15	0.02	0.05	0.03	0.06	0.15	0.17	0.27	0.48	0.27	0.13	0.02	0.47	0.09	0.09	0.12	0.31	0.02	0.18	0.12	0.06	0.19	0.03	0	0.1	0	0	0	0	0.06	0.12	0.13	0.28	0.03	0.04	0	0.25
XLOC_000731	0	0	0	0	0	0	0	0	0	0	0	0	0.04	0	0	0	0.19	0	0	0.07	0	0	0.05	0	0	0	0	0.53	0	0	0	0	0	0	0	0	0	0	0	0	0	0	0	0.03	0	0	0.14	0	0
XLOC_000732	0.04	0	0	0	0	0	0.12	0	0.38	0.45	0.13	0.5	0.3	0.22	0.69	0.37	0.21	0.4	0.09	0.33	0.19	0.05	0.41	0.04	0.19	0.54	0.19	0.29	0.11	0	0.28	0.03	0.09	0.41	0.04	0.17	0.18	0	0.4	0.1	0	0.14	0.1	0.24	0	0	0.09	0.09	0.48
XLOC_000734	0	0	0	0	0	0	0	0	0	0	0.23	0	0.1	0.07	0	0.02	0.22	0.29	0.13	0.18	0.11	0.27	0.18	0.3	0.07	0.31	0.09	0.43	0.1	0	0.07	0.29	0.5	0.12	0	0	0.19	0.13	0	0.14	0.1	0.05	0.16	0.08	0	0.04	0.11	0.15	0.21
XLOC_000736	0	0	0.11	0	0	0	0	0	0	0	0.26	0	0.05	0	0.08	0.03	0.9	0.08	0.15	0.59	0.41	0.37	0.36	0.69	0	0.44	1.13	0.34	0.78	0.42	0.16	0.43	0.25	0.82	0.33	0.05	0	0.1	0	0.11	0.64	1.1	0.51	0.68	0.59	0.64	0.89	0.71	0.11
XLOC_000737	0.11	0.14	0.08	0.11	0	0.06	0	0.06	0.02	0	0.02	0.02	0.31	0.14	0.04	0.12	0.13	0.08	0	0.07	0.19	0.13	0.08	0.06	0.06	0	0.12	0.13	0.04	0.08	0	0	0.03	0.18	0.07	0.07	0	0	0	0	0.06	0.21	0.04	0	0.21	0.06	0	0	0.16
XLOC_000738	0.23	0.2	0.22	0.12	0	0.39	0	0.2	0.35	0.08	0.16	0	0.08	0	0.17	0	0.11	0.12	0.08	0	0	0	0.06	0.13	0.04	0	0.13	0	0	0.05	0	0.05	0	0.45	0.28	0	0	0	0	0	0.04	0.08	0	0.69	0	0	0	0.26	0.09
XLOC_000744	0.39	0.35	0.3	0.59	0.71	0.13	0.22	0.88	0.42	0.6	0.33	0.35	0.37	0.31	0.33	0.49	0.21	0.09	0.18	0.38	0.14	0	0.14	0.13	0	0	0.14	0.22	0	0.2	0.16	0.06	0.13	0.22	0.08	0.32	0.41	0.28	0.56	0.31	0	0	0.02	0	0	0	0	0	0.2
XLOC_000745	0.1	0.33	0.35	0.19	0	0.13	0.22	0.04	0.45	0.31	0	0.1	0.24	0.08	0.38	0.06	0.07	0	0	0	0.09	0	0.08	0	0	0	0.08	0	0	0	0	0.18	0.04	0	0.14	0.38	0.37	0	0.28	0.11	0	0	0	0	0	0	0	0	0
XLOC_000748	0	0	0	0	0.07	0	0	0	0.17	0.43	0.12	0.31	0	0.13	0.29	0.04	0	0.11	0.08	0.22	0.27	0.09	0	0.32	0	0	0.37	0	0	0	0.72	0	0	0	0.07	0	0	1.3	0	0.08	0.04	0	0	0	0.4	0.09	0.25	0	0
XLOC_000749	0	0.04	0.04	0	0.03	0	0	0	0.39	0.34	0	0.23	0.09	0.2	0.23	0.19	0.23	0	0	0.09	0.03	0.21	0.42	0.27	0.07	0.05	0	0.12	0	0.09	0.06	0	0	0.06	0	0.11	0.05	0.24	0.2	0	0	0.02	0	0.32	0.05	0.14	0.04	0.1	0
XLOC_000750	0.1	0.19	0.07	0.16	0.03	0.07	0.05	0.34	0.44	0.14	0.07	0.25	0.49	0.85	0.37	0.36	0.29	0.18	0.21	0.23	0.26	0.25	0.29	0.2	0.14	0.24	0.23	0.17	0.18	0.12	0.08	0.06	0.19	0.31	0.22	0	0.33	0.16	0.51	0.12	0.44	0.32	0.23	0.38	0.78	0.26	0.16	0.44	0.23
XLOC_000751	0	0	0	0	0	0	0.03	0	0	0	0	0	0.03	0	0.04	0	0.09	0.1	0.23	0.12	0.12	0.08	0.08	0.08	0.18	0.37	0	0	0.06	0.11	0.07	0	0.09	0.05	0.09	0	0	0	0	0	0.4	0.05	0	0	0	0	0	0	0.07
XLOC_000754	0	0	0	0	0.04	0	0	0.04	0.04	0.09	0	0.13	0.17	0.06	0.03	0.06	0.97	0.79	0.68	0.33	0.19	0.25	0.35	0.16	0.3	0.39	0.19	0.32	0.13	0.11	0.08	0.3	0	0.09	0.14	0	0.04	0.19	0	0	0	0	0	0.02	0.07	0	0	0.1	0.05
XLOC_000756	0.08	0.05	0	0	0.23	0	0	0.14	0	0.12	0	0	0.04	0.13	0.08	0.13	0.05	0	0	0	0	0	0.18	0.39	0.04	0.08	0.04	0	0	0	0.53	0.14	0.11	0.11	0	0	0	0.08	0	0	0.08	0	0	0	0.14	0	0.26	0.05	0.09
XLOC_000757	0.11	0.24	0.13	0.08	0.07	0	0.23	0.09	0.02	0.09	0.07	0.22	0.13	0.22	0.1	0.16	0.05	0.03	0.04	0.07	0.1	0.34	0.28	0	0.08	0.19	0.04	0.05	0.07	0.23	0.02	0.24	0.03	0.29	0.07	0.07	0	0.04	0	0	0.02	0.04	0.02	0.16	0	0	0.02	0.31	0
XLOC_000762	0.26	0.44	1.12	0.33	0.32	0.28	0.04	0.33	1.28	1.53	0.89	0.5	0.52	0.42	0.62	0.27	0.41	0.84	1.77	0.28	0.42	0.74	0.19	0.32	1.08	2.12	2.86	1.66	0.74	1.07	0.64	0.47	0.52	1.93	2.6	0.66	0.98	0.61	0.46	0.15	0.05	0.12	0.6	0.08	0	0.04	0.33	0.09	0.86
XLOC_000763	0.21	0.23	0.33	0.35	0.33	0.11	0.04	0.28	0.71	0.68	0.53	0.57	0.15	0.2	0.11	0.09	0.16	0.26	0.83	0.13	0.33	0.24	0.17	0.18	0.36	0.51	1.23	0.77	0.07	0.3	0.18	0.19	0.28	0.72	1.19	0.21	0.34	0.66	0.07	0.14	0.04	0	0.45	0.02	0	0.16	0.06	0.06	0.31
XLOC_000764	0	0	0	0	0	0	0	0	0.03	0	0	0	0	0	0	0	0.12	0.04	0	0	0	0	0	0	0.13	0.22	0	0	0	0.03	0	0	0	0	0	0	0	0	0	0	0.03	0.03	0	0	0	0	0	0	0.13
XLOC_000765	0	0	0.03	0.06	0	0	2	0.04	0	0.01	0.01	0.01	0.08	0	1.33	0	0.03	0.04	0	0	0	0	1.31	0	0.11	0	0.03	0	0	0.06	1.27	0	0	0.02	0.04	0	0	0.02	2	0.08	0.03	0.03	0.05	0.02	0	0.03	2.65	0.06	0
XLOC_000766	0.02	0.07	0	0	0	0	0.44	0	0.01	0	0	0.01	0.04	0.04	0.35	0.01	0	0.02	0	0	0.06	0	0.43	0	0.01	0.02	0.02	0.08	0	0	0.84	0.04	0	0	0.18	0.04	0	0.02	0.38	0.02	0.01	0.01	0	0	0	0	0.58	0.01	0
XLOC_000775	0	0	0	0.04	0	0.04	0	0.22	0.03	0	0.08	0.05	0	0.11	0.11	0.2	0.03	0	0	0.19	0.13	0.3	0.12	0.13	0.16	0	0.17	0.25	0.15	0	0.11	0.03	0	0	0	0	0.04	0	0	0.06	0.08	0	0.03	0.17	0	0	0.2	0.1	0.22
XLOC_000776	0.05	0	0.02	0.12	0.09	0.1	0.05	0.04	0.04	0.01	0.05	0.23	0.06	0.04	0.09	0.1	0.05	0.27	0.12	0.39	0.28	0.19	0.14	0.23	0.18	0.01	0.12	0.48	0.1	0.1	0.21	0.14	0.1	0.01	0	0.14	0.04	0.02	0.02	0.03	0.22	0.05	0.06	0.61	0.37	0.12	0.27	0.21	0.43
XLOC_000780	0	0	0	0	0	0	0	0	0	0	0	0	0	0	0	0.04	0.38	0.53	0.08	0.3	0.07	0	0	0.19	0.04	0	0	0	0	0.09	0	0.09	0.11	0	0	0	0.07	0.16	0	0	0.08	0.12	0	0	0	0.09	0.36	0	0.34
XLOC_000781	0.56	0.69	1.71	4.01	1.11	1.44	2.52	3.09	0.2	0.32	0.67	1.04	0.25	0.94	1.24	0.98	0.05	0.32	0.27	0.46	0.06	0.41	1.02	0.56	0.31	0.07	0.19	0.47	0.03	0.25	1.3	0.34	0.18	0.14	0.26	0.98	0.56	0.54	1.12	0.85	0.08	0.12	0.25	0.77	0.21	0.53	1.42	0.43	0.1
XLOC_000782	0.13	0.19	0.33	0.92	0.38	0.94	0.67	0.77	0.13	0.02	0.16	0.4	0.12	0.23	0.44	0.3	0.01	0	0.16	0.28	0.09	0.38	0.5	0.23	0.01	0.02	0.15	0.33	0.04	0.15	0.41	0.38	0.19	0.06	0.12	0.15	0.2	0.22	0.76	0.45	0.06	0.02	0.1	0.33	0.03	0.16	0.26	0.3	0.02
XLOC_000783	0	0.16	0.04	0.14	0	0	0.03	0.08	0.04	0.22	0.45	0.18	0.2	0.02	0.16	0.04	0	0.01	0.04	0.1	0.03	0.07	0.04	0	0.02	0.15	0.23	0.05	0.18	0	0.13	0	0	0.15	0.25	0.23	0.19	0	0.17	0.18	0	0.02	0.15	0	0	0	0.01	0.02	0.02
XLOC_000784	0.2	0.1	0.25	0.27	0.58	0	0.09	0.3	0.75	0.72	0.97	1.22	0.93	0.86	1.03	0.6	0.18	0.19	0.94	0.48	0.62	0	0.27	0.21	0.17	0	0.14	0.46	0.06	0.35	0.26	0.03	0.07	0.11	1.15	0.63	0.76	0.66	0.28	0.22	0.16	0.19	0.33	0.35	0.67	0.09	0	0.13	0.22
XLOC_000787	0.23	0.39	0.28	0.33	0.15	0.33	0.42	0.27	0.14	0.14	0.12	0.43	0.02	0.13	0.19	0.18	0.11	0.03	0.31	0.11	0.1	0.14	0.09	0.13	0.02	0.06	0.26	0.06	0.19	0.14	0.06	0	0.03	0.14	0.07	0.15	0.07	0	0.04	0	0.38	0.13	0.17	0.27	0.07	0.05	0.63	0.5	0.43
XLOC_000790	0.24	0.27	0.49	0.41	0.46	0.6	0.37	0.47	0.2	0.03	0.2	0.35	0.31	0.44	0.22	0.2	0.07	0.06	0.13	0.08	0.01	0.03	0.02	0.09	0	0.01	0.13	0.09	0.07	0.19	0.04	0.07	0	0.07	0.07	0.09	0.09	0.36	0.06	0.16	0.09	0.04	0.15	0.15	0.33	0.19	0.11	0.06	0.18
XLOC_000791	0.06	0.16	0.69	0.42	0	0.51	0	0.16	0.14	0.47	0.34	0.35	0.13	0.34	0.46	0.45	0.13	0.09	0	0.17	0.05	0.14	0.09	0.05	0	0	0.17	0.31	0	0	0.19	0.07	0.13	0.09	0.22	0.64	0	0.12	0.14	0	0.03	0.33	0	0.36	0	0.18	0.16	0.36	0
XLOC_000792	0.06	0.04	0.02	0	0.06	0.08	0.05	0.05	0.09	0.3	0.14	0.21	0.34	0.37	0.02	0.1	0.02	0	0	0	0	0	0	0.03	0	0	0	0	0	0	0	0	0.35	0.18	0.28	0.12	0.18	0.06	0	0	0	0	0	0	0.04	0	0	0	0
XLOC_000793	0	0	0	0	0	0	0	0	0	0	0.11	0	0.04	0.08	0	0	0.24	0	0.07	0.07	0	0.08	0	0	0	0	0	0.11	0.04	0	0	0	0	0	0	0	0	0.77	0	0	0	0	0	0.1	0	0	0	0	0
XLOC_000794	0	0	0	0	0	0	0.09	0	0.11	0.05	0.05	0	0	0	0	0.06	0	0	0	0.09	0.31	0.59	0	0	0	0	0.14	0	0	0	0	0.18	0	0	0	0	0.04	0.1	0	0	0	0.11	0	0	0.06	0	0	0	0
XLOC_000795	0.17	0.07	0.34	0.63	0.43	0.06	0.52	0.32	1.33	1.07	2.34	1.43	0.69	1.02	0.72	1.26	1.12	1.8	2.46	2.37	1.18	1.46	2.57	2.28	1.48	1.08	1.48	1.94	0.98	0.58	2.02	1.56	1.4	0.59	2.53	1.31	0.95	1.48	1.35	1.32	0.72	1.35	1.8	1.67	0.79	0.62	1.41	1.86	1.02
XLOC_000796	0.08	0.09	0.13	0.12	0.15	0.27	0.19	0.16	0.09	0.05	0.5	0.3	0.06	0.27	0.1	0.17	0.09	0.26	0.42	0.56	0.47	0.38	0.21	0.18	0.22	0.27	0.37	0.26	0.41	0.45	0.32	0.18	0.32	0.08	0.1	0.08	0.25	0.22	0.12	0.15	0.04	0.06	0.45	0.26	0.06	0.22	0.04	0.02	0.3
XLOC_000798	0.02	0.15	0.16	0.59	0.35	0.27	0.23	0.36	0.19	0.34	0.14	0.16	0.27	0.38	0.15	0.39	0.26	0.22	0.12	0.15	0.16	0.27	0.19	0.38	0.12	0.19	0.14	0.27	0.19	0.21	0.23	0.34	0.18	0.18	0.18	0.22	0.09	0.17	0.15	0.3	0.1	0.23	0.14	0.49	0.09	0.32	0.13	0.29	0.17
XLOC_000799	0.59	0.51	0.72	0.69	0.63	0.66	1.18	1.19	0.75	0.8	0.85	0.53	1.86	0.5	1.65	1.22	1.75	0.95	1.18	0.8	1.06	0.36	1.12	1.4	1.61	2.47	1.15	0.61	0.51	1.26	0.56	1.08	2.12	2.38	1.04	0.51	0.45	0.36	1.15	0.53	1.42	2.4	1.87	0.41	0.87	0.56	1.35	0.91	0.53
XLOC_000803	0	0	0	0	0	0	0	0	0.04	0	0	0	0	0	0	0	0	0	0	0.07	0	0	0	0	0	0	0	0	0.55	0	0	0	0	0	0	0	0	0	0.09	0	0.12	0	0.04	0	0	0	0	0	0.17
XLOC_000810	0.19	0.17	0.33	0.1	0.1	0.38	0.21	0.15	0	0.02	0.02	0.05	0.08	0	0.06	0	0	0.03	0.04	0.14	0.09	0.08	0.07	0	0.19	0	0.14	0.04	0.01	0.07	0	0.03	0.12	0.18	0.04	0.18	0.07	0.11	0	0	0.01	0.36	0.09	0.21	0.09	0.41	0.18	0	0
XLOC_000811	0.04	0.1	0.05	0	0.07	0.03	0	0	0.87	0.12	0.24	0.2	0.43	0.39	0	0.02	0.24	0.2	0.11	0.22	0.03	0.05	0.24	0	0.04	0.56	0.15	0	0.02	0.02	0	0.05	0.69	0.31	0.21	0.07	0.13	0.16	0.26	0	0.23	0.08	0.08	0	0.09	0.64	0.26	0.1	0.3
XLOC_000813	0.27	0.25	0.12	0.21	0.11	0.23	0.05	0.14	0.19	0.03	0	0	0.17	0.24	0.12	0.03	0.27	0	0	0	0.05	0.13	0.13	0.09	0.18	0.18	0.33	0	0.03	0.13	0.03	0.23	0.08	0.24	0.5	0.32	0.05	0.28	0.12	0	0.24	0.09	0.12	0.16	0.1	0.19	0.04	0.22	0.3
XLOC_000814	0	0	0	0.01	0.02	0	0	0	0.31	0.24	0.39	0.57	0.27	0.06	0.24	0.21	0.3	0.27	0.29	0.65	0.34	0.1	0.17	0.21	0.17	0.07	0.17	0.5	0.27	0.08	0.19	0.16	0.2	0.14	0.14	0.34	0.52	0.05	0.13	0.18	0.18	0.41	0.2	0.37	0.09	0.03	0.11	0.07	0.27
XLOC_000816	0.04	0	0.06	0	0	0	0	0	0.39	0.21	0.25	0.4	0.17	0.18	0.22	0.21	0.54	0.14	0.27	0.39	0.2	0.16	0.18	0.23	0.52	0.41	0.1	0.35	0.19	0.03	0.02	0.05	0.23	0.46	0.21	0.87	0.23	0.14	0	0.05	0.02	0.68	0.27	0.54	0	0	0.06	0.12	0.3
XLOC_000825	1	1.75	0.75	0.73	0.75	1.74	0.94	1	0.04	0.11	0.08	0.06	0.16	0.11	0.08	0.03	0.1	0.02	0.01	0.06	0.05	0.13	0.09	0.04	0.01	0.09	0.02	0.03	0.13	0.09	0	0.08	0.08	0.1	0.05	0.01	0.07	0.13	0.02	0	0.08	0.08	0.13	0.09	0.26	0.13	0.08	0.04	0.06
XLOC_000826	0.76	1.09	0.79	0.78	0.47	1	0.72	0.54	0.05	0.02	0.08	0.1	0.12	0.04	0.05	0.02	0.03	0.04	0.04	0.02	0.01	0.04	0.04	0.02	0.07	0.1	0.07	0.07	0.01	0.09	0	0.04	0.01	0.03	0.02	0.03	0.01	0.05	0.02	0.03	0.02	0.09	0.07	0.07	0.04	0.17	0.06	0.03	0.03
XLOC_000828	0.05	0.11	0	0.09	0.05	0.05	0.65	0.05	0.1	0.03	0.65	0	0.03	0	0	0	0.31	0.25	0.05	0.05	0.34	0.26	0.13	0.23	0.48	0.42	0.12	0.28	0.24	0.26	0.67	0.1	0.2	0.12	0.3	0.32	0	0.34	0.13	0.12	0	0.06	0	0.03	0	0	0.04	0	0.37
XLOC_000833	0	0	0	0	0	0	0	0	0.19	0.25	0.06	0	0.16	0.03	0.29	0.01	0.07	0.13	0.13	0.12	0.04	0.06	0.08	0.17	0.18	0	0.14	0.12	0.28	0	0.07	0.05	0	0.06	0.05	0	0.21	0.33	0.14	0.03	0.16	0.07	0	0	0.09	0.01	0.1	0.08	0.06
XLOC_000834	0	0.02	0.02	0.01	0.01	0.12	0.01	0	0	0.03	0.01	0.03	0.02	0.03	0.02	0	0.19	0.34	0.54	0.35	0.64	0.34	0.27	0.31	0.38	0.61	0.33	0.31	0.79	0.59	0.72	0.69	0.04	0.11	0.06	0	0.1	0.18	0.2	0.21	0.64	0.53	1.38	1.2	1.94	2.21	1.41	1.5	0.25
XLOC_000835	0.04	0.01	0.01	0.01	0.02	0.03	0.02	0.01	0.01	0	0.03	0.04	0	0	0.01	0.01	0.02	0.09	0.05	0.12	0.21	0.25	0.19	0.13	0.09	0.18	0.25	0.11	0.3	0.31	0.34	0.4	0.12	0.06	0.02	0.02	0.01	0.06	0.02	0.11	0.27	0.32	0.35	0.6	0.86	0.72	0.31	0.66	0.1
XLOC_000838	0	0.04	0	0	0.11	0	0.16	0	0.07	0.15	0.09	0.15	0.16	0.13	0.03	0.17	0.25	0.54	0.06	0.11	0.05	0.14	0.09	0.25	0.07	0.13	0.07	0.03	0	0	0	0.04	0.68	0.35	0	0.06	0.15	0	0.07	0.2	0	0	0.07	0.18	0.38	0.11	0.16	0.12	0.2
XLOC_000839	0.13	0.16	0.19	0.29	0.17	0.43	0.36	0.12	0.05	0.16	0.14	0.03	0.21	0.16	0.43	0.18	0.11	0.13	0.33	0.13	0.06	0	0.93	0.15	0.16	0.11	0.37	0.12	0.16	0.41	0.36	0.17	0.44	0.19	0.26	0.06	0.06	0.11	0.38	0.22	0.11	0.06	0.46	0.12	0.03	0.13	0.56	0.29	0.2
XLOC_000840	0.09	0.3	0.41	0.03	0.04	0.11	0.16	0.15	0.05	0.25	0.59	0.19	0.12	0	0.24	0.2	0.12	0.1	0.66	0.09	0.04	0.16	0.35	0.04	0.27	0	0.42	0.11	0	0.1	0.54	0.08	0	0.03	0.33	0.6	0.19	0.05	0.05	0.69	0.27	0.02	0.15	0.02	0	0.26	0.27	0	0.2
XLOC_000841	0	0	0	0	0	0	0	0	0	0	0	0	0.04	0	0.11	0	0.05	0	0.07	0.06	0.24	0.16	0.42	0	0.11	0	0.04	0.38	0.54	0.08	0	0	0	0	0.12	0	0.63	0	0.31	0.23	0	0	0	0	0	0	0	0	0
XLOC_000842	0.26	0.03	0.55	0.12	0.06	0.17	0.04	0.15	0.11	0.09	0.26	0.11	0.12	0.02	0.19	0.19	0.27	0.02	0.02	0.08	0.08	0.18	0.1	0.04	0.02	0.22	0.32	0.11	0.07	0.17	0.27	0.29	0.09	0	0.14	0.06	0.04	0.04	0.25	0	0.16	0.26	0.43	0.36	0.61	0.31	0.38	0.27	0.29
XLOC_000844	0.11	0.31	0.11	0.33	0.15	0.15	0.28	0.19	0.27	0.21	0.07	0.13	0.37	0.36	0.31	0.21	0.19	0.18	0.13	0.12	0.23	0.18	0.19	0.3	0.19	0.09	0.11	0.15	0.12	0.16	0.22	0.12	0.15	0.2	0.2	0.15	0.14	0.33	0.33	0.12	0.04	0.19	0.05	0.12	0.3	0.21	0.28	0.1	0.15
XLOC_000845	0	0	0	0	0	0	0	0	0	0	0	0	0	0	0	0	0	0	0	0	0	0	0	0	0	0	0	0	0	0	0	0	0	0	0	0	0	0	0	0	0	0.33	0	0	0	0	0	0	0
XLOC_000846	0	0	0.07	0	0.25	0.09	0	0.09	0	0.33	0.13	0	0.06	0	0	0.09	0	0	0	0	0	0	0.08	0	0	0.06	0	0.11	0.03	0	0	0.06	0	0	0.1	0	0	0	0	0	0.06	0.11	0.17	0	0.21	0	0.07	0	0
XLOC_000847	0	0	0	0	0.13	0	0.08	0	0.11	0.14	0.12	0	0.15	0	0.03	0.16	0.23	0.07	0.05	0	0.21	0	0.18	0.04	0	0.05	0.08	0.17	0	0.05	0.15	0	0.16	0	0.04	0	0.12	0.28	0.21	0	0.2	0.12	0	0	0.05	0.03	0.03	0	0
XLOC_000849	0.03	0	0	0	0	0	0	0	0.1	0.06	0.12	0.06	0	0	0.02	0	0.1	0.09	0	0.17	0.18	0.18	0.05	0.05	0.05	0.03	0.37	0.07	0	0.1	0.03	0.04	0.23	0	0.19	0.06	0.07	0.18	0	0.07	0.22	0.13	0.16	0.07	0.07	0.09	0.08	0.14	0.03
XLOC_000850	0	0	0	0	0	0	0	0	0	0	0.13	0	0	0	0	0	0	0.19	0.36	0	0	0	0	0.06	0.04	0	0	0.18	0	0	0.15	0	0.3	0	0	0	0	0	0	0	1.06	0.38	0	0	0	0.02	0	0	0.16
XLOC_000853	0.19	0.03	0	0	0.1	0.21	0	0.09	0.31	0.03	0.13	0	0.13	0	0	0.11	0.03	0	0	0.14	0.48	0.24	0.04	0.04	0.08	0.05	0.14	0.18	0.39	0.29	0	0.27	0.18	0.04	0.23	0	0.25	0.15	0	0.27	0.21	0.05	0.05	0.12	0.37	0.47	0.16	0.3	0.05
XLOC_000854	0.23	0.1	0.11	0.06	0.07	0.19	0.14	0.07	0.09	0.08	0.16	0.2	0.08	0.25	0.29	0	0.05	0.17	0.15	0.44	0.14	0	0.24	0.13	0.17	0.04	0.38	0.86	0	0.85	0.36	0	0.05	0.5	0.35	0.22	0	0	0.26	0.08	0.12	0.12	0	0.27	0.27	0.05	0.2	0.05	0.17
XLOC_000856	0.43	0.29	0	0.15	0.18	0.11	0.06	0.27	1.2	0.75	1.7	0.49	0.13	0.24	0.07	0.29	4.5	5.1	1.94	2.59	1.46	1.88	2.21	1.75	2.18	1.8	1.18	2.86	0.96	0.66	1.09	0.8	0.85	1.24	0.69	1.03	0.21	1.09	0.72	0.14	0.61	0.51	0.03	0.5	0.95	0.48	0.38	0.71	3.21
XLOC_000857	0.08	0.03	0	0.03	0.04	0.13	0.35	0.1	0.09	0.08	0.08	0	0.08	0.17	0.04	0.02	0.14	0.09	0.08	0.04	0.21	0.19	0.12	0.16	0	0.4	0.02	0.08	0.02	0.07	0.45	0.07	0.11	0.03	0.14	0.07	0.07	0.08	0.22	0	0	0.08	0.19	0.25	0	0	0.23	0.1	0
XLOC_000860	0	0	0	0	0	0	0	0.05	0.22	0.34	0.21	0.31	0.14	0.35	0.22	0.17	0.21	0.33	0.62	0.83	0.48	0.36	0.27	0.2	0.19	0.03	0.84	0.28	0.08	0.32	0.09	0	0.21	0.26	0.12	0.36	0.25	0.22	0	0.3	0.06	0.35	0.06	0.13	0.27	0.26	0.04	0.04	0.54
XLOC_000861	0.03	0.03	0.03	0.2	0.01	0.17	0.03	0.41	0.14	0.09	0.06	0.25	0.05	0.13	0.38	0.51	0.03	0	0.09	0.17	0	0.21	0.16	0.51	0.13	0.06	0.15	0.23	0.06	0.32	0.28	1.03	0.59	0.13	0.47	0.75	0.03	0.44	0.57	2.63	0.26	0.03	0.09	0.69	0.08	0.21	0.42	0.45	0.09
XLOC_000862	0.08	0.05	0.07	0.21	0.06	0.52	0.37	0.28	0.17	0.17	0.3	0.32	0.01	0.19	0.64	0.33	0.15	0.07	0.24	0.14	0	0.3	0.15	0.24	0.33	0.23	0.5	0.25	0.08	0.52	0.32	0.62	0.6	0.42	1.56	1.76	0.13	1.47	1.25	1.24	0.17	0.29	0.51	0.79	0.03	0.23	0.65	0.41	0.1
XLOC_000863	0	0	0	0	0	0	0	0	0	0	0	0	0	0	0.04	0.05	0	0	0	0	0.07	0	0	0	0	0	0	0	0	0	0.56	0.05	0	0	0	0	0	0	0.09	0	0.31	0	0.04	0	0	0.1	0	0	0.09
XLOC_000869	0.87	0.89	0.61	0.35	0.83	1.23	1.02	0.49	0	0.23	0.03	0	0.06	0.05	0.06	0.05	0.04	0.04	0.09	0.11	0.03	0.07	0.09	0.07	0.2	0.05	0	0.05	0.07	0.09	0	0	0.19	0.17	0.03	0.06	0	0	0	0	0.58	0.26	0.15	0.03	0.14	0.16	0.16	0.02	0.03
XLOC_000874	0.27	0	0.12	0.07	0.33	0.32	0.13	0.15	0.17	0.11	0.22	0.15	0.16	0.13	0.01	0.29	0.12	0.29	0.13	0.12	0.08	0.05	0.1	0.07	0.06	0.37	0.06	0	0.03	0.04	0.38	0.17	0.15	0.14	0.21	0.12	0.11	0	0.19	0	0.18	0.01	0.19	0.34	0.33	0.36	0.3	0.16	0.14
XLOC_000875	0.15	0.32	0.24	0.28	0.15	0.1	0.11	0.26	0.14	0.27	0.06	0.06	0.1	0	0.02	0	0.38	0.18	0.24	0.47	0.14	0.11	0.21	0.67	0.15	0.02	0.27	0.12	0	0.09	0.21	0.79	0.48	0.04	0.06	0.06	0	0.06	0	0	0.46	0.57	0.17	0.26	0.23	0.23	1.04	0.32	0.34
XLOC_000876	0.43	1.06	1.13	0.47	0.56	0.79	1.41	1.41	2.56	3.97	2.7	1.83	1.84	3.58	6.02	4.05	0.45	0.38	0.41	0.36	0.52	0.35	0.84	0.87	0.35	0.61	1.08	0.37	0.88	0.57	0.65	1.24	0.43	1.13	1.32	1.34	1.3	1.71	6.77	3.11	0.02	0.17	0.58	0.5	0.56	0.44	0.8	0.4	0.25
XLOC_000884	0.44	0.32	0.24	0.29	0	0	0.09	0.09	0.3	0.14	0.33	0.2	0.22	0.04	0.22	0.02	0.22	0.91	0.1	0.3	0.34	0.12	0.19	0.32	0.59	0.48	0.15	0.39	0.15	0.44	0.2	0.19	0.15	0.18	0.44	0.4	0.26	0.25	0.24	0	0.88	0.22	0.09	0.15	0.66	0.24	0.21	0.07	0.34
XLOC_000886	2.69	3.34	4.29	3.75	3.44	4.79	3.72	3.55	0.26	0.15	0.8	0.23	0.08	0.07	0.22	0.06	0.35	0.45	0.49	0.43	0.47	0.39	0.62	0.5	0.37	0.29	0.34	0.51	0.34	0.29	0.39	0.22	0.44	0.33	0.35	0.43	0.2	0.27	0.23	0.16	0.07	0.04	0.3	0.32	0.22	0.26	0.33	0.31	0.27
XLOC_000888	0.35	0.17	0.51	0.16	0.39	0.37	0.35	0.33	0.15	0.17	0.12	0.08	0.18	0.18	0.26	0.12	0.11	0.23	0.05	0.12	0.2	0.06	0.22	0.04	0.27	0.06	0.25	0.16	0.05	0.15	0.19	0.12	0.04	0.22	0.23	0.07	0.17	0.1	0.17	0.06	0.18	0.03	0.2	0.29	0.04	0.09	0.22	0.03	0.06
XLOC_000891	0.13	0.16	0	0.03	0.56	0.12	0.21	0.15	0.8	0.46	0.07	0.23	0.5	0.51	0.35	0.19	0.19	0.21	0.17	0.32	0.51	0.2	0.24	0.2	0.37	0.09	0.39	0.33	0.31	0.52	0.05	0.06	0.56	0.42	0.16	0.55	0	0.03	0	0.11	0.26	0.53	0.24	0.13	0.63	0.42	0.2	0.05	0.19
XLOC_000895	1.16	1.85	0.67	1.13	1.16	1.31	1.4	1.42	0.5	0.34	0.31	0.61	0.59	0.34	0.57	0.43	0.58	0.47	0.19	0.24	0.68	0.56	0.6	0.55	0.34	0.61	0.52	0.34	0.35	0.54	0.44	0.7	0.9	0.76	0.36	0.31	0.38	0.52	0.66	0.41	0.89	1.21	0.42	0.49	0.98	0.71	0.9	0.57	0.9
XLOC_000897	0.03	0	0	0	0	0	0	0	0	0	0	0	0	0	0	0	0	0.27	0.05	0	0.05	0	0	0.09	0.13	0.03	0.07	0	0.19	0.09	0.07	0.05	0	0.04	0	0	0	0	0	0	0	0.03	0	0	0	0	0	0	0.37
XLOC_000900	0.45	0.88	0.49	0.16	0.42	0.31	0.21	0.46	0.26	0.14	0.15	0.04	0.06	0.13	0.23	0.32	0	0.02	0	0	0.04	0	0.02	0.04	0.11	0.06	0.06	0	0.05	0	0.01	0.05	0.12	0.1	0.36	0.06	0.32	0.21	0.22	0.38	0.06	0.04	0.02	0.06	0.04	0	0.04	0.06	0.01
XLOC_000901	0	0	0	0	0	0	0.42	0	0.18	0.48	0.47	0.32	0.04	0	0.08	0	0.05	0.17	0.15	0	0	0	0.12	0.13	0	0	0.08	0	0	0.14	0.16	0.28	0.27	0	0.07	0.3	0	0	0	0	0.17	0	0.85	0	0	0	0.05	0	0
XLOC_000903	1.04	1.12	1.37	1.19	0.98	1.06	1	0.63	0.13	0.03	0.06	0.05	0.08	0.05	0.1	0.08	0.19	0.26	0.28	0.17	0.2	0.15	0.12	0.13	0.28	0.31	0.25	0.19	0.15	0.18	0.07	0.11	0.47	0.41	0.16	0.22	0.13	0.24	0	0.05	0.43	0.39	0.27	0.25	0.13	0.39	0.13	0.08	0.37
XLOC_000907	0	0	0	0.05	0	0	0	0.11	0	0	0	0	0	0.44	0	0	0	0	0	0	0	0.15	0	0	0	0	0	0	0	0.25	0	0	0	0	0	0	0	0	0	0	0	0	0	0	0	0.18	0	0	0.07
XLOC_000909	0.76	0.23	0.33	0.12	0.12	0.18	0.31	0.17	0.44	0.04	0.23	0.19	0.12	0.19	0.29	0.04	0.19	0.79	0.2	0.1	0.13	0.41	0.49	0.14	0.73	0.27	0.08	0.05	0.24	0.2	1.01	0.05	0.85	0.13	0.1	0.29	0.09	0.15	0.65	0.2	1.12	0.14	0.33	0.24	0.28	0.51	0.73	0.02	1.07
XLOC_000910	0.21	0	0.05	0.05	0	0.06	0.26	0	0.08	0	0.04	0.04	0	0.08	0	0.12	0	0	0	0.07	0	0.42	0.17	0	0.19	0	0.08	0.04	0.17	0.08	0	0	0.15	0	0.13	0.14	0.06	0	0	0	0	0.04	0.12	0.49	0	0	0.05	0	0
XLOC_000912	0	0	0	0.08	0	0	0.05	0.35	0	0.11	0.03	0.08	0	0.06	0.25	0.03	0.07	0.04	0.25	0	0.09	0	0	0.17	0.03	0.47	0.11	0.36	0.09	0	0	0.03	0.04	0.33	0	0.39	0.09	0.16	0.23	0.23	0.11	0	0	0.13	0.27	0.06	0.41	0.14	0
XLOC_000913	1.18	1.08	0.64	1	1.03	0.76	0.73	1.56	0.67	0.44	0.5	0.8	0.61	0.9	0.44	0.83	0.57	0.23	0.21	0.45	0.19	0.51	1.24	1.4	0.68	0.95	0.83	0.57	0.84	0.28	0.38	0.67	0.52	1.12	0.43	0.7	0.76	0.78	0.54	0.57	0.25	0.25	0.66	0.59	0.25	0.43	0.8	0.66	0.33
XLOC_000916	0	0	0.07	0	0.05	0.08	0.04	0	0	0.05	0.15	0.32	0.08	0.03	0	0.13	0.17	0.25	0.57	0.41	0.34	0.34	0.11	0.32	0.16	0.18	0	0.1	0	0.11	0.1	0.17	0.1	0.24	0.31	0	0.24	0.1	0.05	0.11	0.21	0.18	0.05	0	0.25	0.06	0	0.13	0.05
XLOC_000918	0	0	0	0	0	0	0.03	0	0.06	0	0.05	0.02	0.04	0	0	0	0.24	0.04	0.24	0.21	0.27	0.1	0.06	0.05	0.14	0.04	0.12	0.04	0.19	0.08	0.04	0.02	0.07	0.07	0.06	0	0	0.11	0	0.04	0.1	0.21	0.48	0.56	0.35	0.4	0.31	0.11	0
XLOC_000921	0.53	0.23	0.18	0.22	0.17	0.31	0.15	0.47	1.26	0.72	0.97	0.56	0.45	0.44	0.23	0.89	0.72	1.08	0.4	0.05	0.25	0.27	0.49	0.67	0.85	0.4	0.33	0.26	0.33	0.3	0.26	0.48	0.89	0.62	1.15	0.79	0.26	1.45	0.45	1.58	0.99	0.49	0.27	0.27	0.45	0.3	0.13	0.51	0.57
XLOC_000925	0.15	0.05	0.12	0	0	0	0.03	0	0.05	0.14	0.1	0.24	0.26	0.54	0.64	0.31	0.03	0.1	0	0.04	0	0	0.06	0	0.16	0	0	0.06	0	0	0	0	0.12	0.05	0.05	0.36	0.16	0.09	0.19	0.25	0	0	0	0.02	0	0	0.07	0	0.08
XLOC_000927	0	0.01	0.02	0	0	0.02	0	0	0.26	0.24	0.42	0.13	0.43	0.42	0.46	0.36	0.09	0.14	0.11	0	0	0.03	0.04	0.02	0.01	0.16	0.19	0.09	0	0.08	0.12	0.05	0	0.04	0.14	0.1	0.17	0.11	0.36	0.22	0	0	0	0	0	0	0	0.04	0.09
XLOC_000929	0	0	0	0	0	0.07	0.08	0.08	0	0	0	0	0.28	0.29	0.14	0	0.3	0	0.13	0	0.15	0.05	0.1	0.07	0.21	0.09	0	0.04	0.21	0.1	0.05	0.05	0.18	0.16	0.08	0	0.04	0.13	0	0	0.21	0.02	0.07	0.09	0.2	0.2	0.66	0.26	0
XLOC_000931	0	0.07	0	0	0	0	0	0	0.13	0.19	0.18	0.04	0.69	0.52	0.51	0.46	0.14	0.3	0.28	0.05	0.71	0.69	1.07	1.14	0.01	0.21	0.26	0.1	0.4	0.29	0.58	0.32	0	0.15	0.07	0.07	0.56	0.26	0.82	0.7	0	0	0	0.02	0.01	0.02	0.12	0.07	0.21
XLOC_000932	0	0	0	0	0	0	0	0	0	0	0.03	0	0	0	0	0	0.07	0.05	0.44	0.03	0	0	0	0	0.04	0.33	0.06	0	0	0	0.14	0.06	0.17	0.39	0.03	0	0	0	0	0.15	0	0	0	0	0	0	0	0	0.15
XLOC_000934	0	0	0.03	0	0.41	0	0	0.1	0.04	0	0	0	0.06	0	0	0.02	0	0	0	0.04	0.03	0	0	0	0.02	0	0	0	0.09	0	0	0	0	0.03	0	0.04	0.13	0	0	0	0	0.02	0	0.04	0	0	0	0	0
XLOC_000938	0	0	0	0	0.06	0.06	0	0	0.07	0	0.07	0.12	0.12	0.07	0.09	0.07	0.27	0.34	0.13	0.03	0.32	0.12	0.13	0.08	0.13	0.3	0.13	0.07	0.24	0.04	0.09	0.12	0.25	0.31	0	0.12	0.05	0.43	0	0	0.04	0.16	0.25	0.23	0.23	0.13	0.04	0.41	0.22
XLOC_000945	0.16	0.14	0.09	0.27	0.15	0.31	0.36	0.34	0.17	0.14	0.09	0.03	0.2	0.1	0.13	0.15	0.06	0.04	0.08	0.15	0.21	0.41	0.1	0.36	0	0.19	0.04	0.16	0.06	0.19	0.43	0.25	0.09	0.35	0.24	0.08	0.49	0.56	0.09	0.09	0.06	0.37	0.83	0.31	0.25	0.37	0.09	0.39	0.06
XLOC_000950	0.41	1.75	1.74	2.82	3.21	1.77	1.45	3.11	0.01	0.08	0.07	0.3	0.17	0.11	0.16	0.27	0.05	0.01	0.08	0.15	0.22	0.09	0.15	0.29	0	0.09	0.35	0.2	0.2	0.12	0.17	0.33	0	0.07	0.11	0.1	0.04	0.12	0.06	0.16	0.06	0.08	0.19	0.48	0.57	0.26	0.33	0.53	0.07
XLOC_000953	0.42	0.28	0.37	0.77	0.19	0.7	0.18	0.92	0.3	0.1	0.27	0.38	0.26	0.24	0	0.36	0.12	0.32	0.43	0.35	0.35	0.51	0.08	0.19	0.4	0.18	0.16	0.22	0.28	0.35	0.07	0.2	0.14	0.29	0.15	0.6	0.19	0.5	0	0.36	0.16	0.23	0.42	0.39	0.52	0.31	0	0.31	0.26
XLOC_000955	0.05	0.22	0.07	0	0.28	0.12	0.09	0.08	0	0.02	0	0.07	0.13	0.05	0.08	0	0	0	0.1	0.46	0.09	0.06	0	0	0	0	0	0.05	0	0	0	0	0.07	0.07	0.09	0	0	0.29	0	0	0.13	0	0	0.1	0	0.06	0	0.1	0
XLOC_000956	0	0.25	0.12	0.24	0.2	0.06	0.06	0.06	0.12	0.11	0	0.09	0.11	0.04	0.28	0.04	0.07	0	0.03	0	0	0	0.13	0	0.08	0.13	0	0	0	0.42	0.07	0	0.19	0	0.03	0.2	0	0	0.08	0	0.11	0.09	0	0.05	0.2	0.2	0	0	0
XLOC_000957	0	0	0.08	0.06	0.21	0.07	0.05	0.02	0.06	0.03	0.24	0.11	0.04	0.12	0.19	0.17	0.33	0.02	0	0.05	0	0.13	0.09	0.09	0.02	0.13	0.08	0.07	0	0.14	0.06	0.07	0.06	0.04	0.23	0.03	0.02	0.06	0	0.12	0.01	0.04	0	0	0.03	0.03	0.09	0.07	0.03
XLOC_000959	0.33	0.6	0.43	0.59	0.03	0.44	0.65	0.45	0	0	0.02	0	0	0	0.08	0.02	0	0	0.06	0.06	0.19	0.07	0.02	0	0	0	0	0	0.07	0	0	0.04	0	0	0	0	0	0	0	0	0	0	0	0	0	0	0	0	0
XLOC_000961	0	0	0	0	0	0.13	0	0	0	0	0.22	0.02	0.21	0.37	0.6	0	0.08	0.03	0.16	0.04	0	0	0	0.1	0	0.23	0.07	0.02	0.07	0.21	0.17	0	0	0.06	0.22	0.11	0	0.08	0	0	0.04	0.25	0.3	0.22	0.09	0.42	0.18	0.08	0
XLOC_000964	0	0	0.67	0.05	0.14	0.18	0.13	0.33	0.08	0.13	0.13	0.07	0.02	0.1	0.11	0.06	0	0	0	0	0.12	0	0	0.24	0	0.06	0.23	0	0.28	0.08	0	0.04	0	0.15	0.29	0.03	0.27	0.28	0.04	0	0	0.06	0.19	0.07	0	0.06	0	0	0
XLOC_000967	0.08	0.11	0	0	0.08	0.21	0.15	0	0	0	0.08	0.13	0	0.04	0	0.09	0	0.18	0	0	0	0	0	0	0	0	0	0	0	0	0	0.39	0	0.06	0	0.85	0	0	0	0	0	0	0	0	0	0	0	0	0
XLOC_000972	0.04	0	0.05	0.03	0.02	0	0.03	0	0.12	0.02	0.03	0.1	0.1	0.08	0.07	0.04	0.34	0.23	0.02	0.11	0.15	0.25	0.07	0.02	0.3	0.09	0.02	0.02	0.13	0	0	0	0.12	0.11	0	0	0.14	0.02	0.15	0	0.02	0.14	0	0.09	0.04	0.06	0	0	0.1
XLOC_000973	0	0	0	0	0	0	0	0	0	0	0	0.04	0	0	0	0	0	0	0	0.08	0	0	0	0	0	0.22	0	0	0	0	0	0	0	0	0	1.02	0	0	0	0	0	0	0	0	0	0	0	0	0
XLOC_000976	0.34	0.18	0.26	0.36	0.39	0.12	0.19	0.3	0.15	0.03	0.06	0.11	0.27	0.15	0.1	0.09	0.09	0.08	0.03	0.01	0.17	0.03	0.16	0.12	0.14	0.05	0.03	0.07	0.1	0.09	0	0.05	0.15	0.11	0.06	0.11	0.07	0.25	0.05	0.11	0.15	0.1	0.14	0.21	0.13	0.08	0.07	0.16	0.05
XLOC_000977	0.19	0.15	0.22	0.22	0.23	0.08	0.03	0.08	0.19	0.18	0.17	0.2	0.09	0.29	0.14	0.15	0.18	0.05	0.07	0.14	0.13	0.04	0.25	0.19	0.11	0.16	0.12	0.18	0.34	0.07	0.08	0.14	0.06	0.1	0.32	0.65	0.2	0.54	0.19	0.32	0.24	0.1	0.08	0.15	0.17	0.05	0.08	0.16	0.03
XLOC_000981	0.07	0	0	0	0	0	0	0	0	0.08	0	0	0	0	0	0	0	0	0	0.07	0	0	0	0	0	0	0	0	0	0	0	0.53	0	0	0	0	0.06	0	0	0	0.32	0	0	0	0	0	0	0	0.08
XLOC_000987	0	0	0.1	0	0	0	0	0	0.08	0	0.04	0	0.26	0.23	0	0.04	0	0	0	0	0.06	0.25	0.05	0.29	0	0.04	0.15	0	0.04	0	0	0	0	0	0	0	0	0.07	0.24	0	0	0.15	0	0	0.36	0	0	0.05	0.15
XLOC_000994	0.05	0.16	0.17	0.21	0.74	0.18	0.02	0.21	0.06	0.03	0	0.01	0.07	0.04	0	0.03	0.09	0.16	0.11	0.1	0.31	0	0.25	0.07	0	0	0	0.04	0.02	0.06	0.03	0.21	0	0.27	0.2	0.05	0.09	0	0	0	0.06	0.13	0.18	0.16	0.96	0.17	0.27	0.11	0.18
XLOC_000995	0.28	0.33	0.35	0.51	0.04	0.21	0.22	0.4	0.02	0.11	0.02	0.06	0.15	0.18	0.13	0.26	0.06	0.06	0.41	0	0	0	0.13	0.03	0	0.13	0	0.06	0	0	0	0	0.03	0	0	0	0	0	0	0	0	0	0	0	0	0	0	0.06	0
XLOC_000999	0	0.08	0.02	0	0.03	0	0.09	0.11	0	0	0.26	0.07	0.07	0.1	0.07	0.11	0.02	0.14	0.06	0.09	0.22	0.04	0.12	0.08	0.02	0.27	0.23	0.03	0	0.02	0	0.19	0.07	0	0	0	0	0	0	0.31	0.03	0	0.1	0.02	0.15	0.04	0.27	0.04	0.21
XLOC_001000	0.1	0.13	0.1	0.15	0	0	0.18	0.21	0	0.1	0.33	0.05	0.08	0.14	0.11	0.17	0.03	0.07	0.15	0.28	0.26	0.18	0.04	0.21	0	0	0	0.4	0.09	0.32	0.23	0.03	0	0.11	0.18	0.14	0.17	0	0	0	0	0.03	0.51	0	0.17	0	0.03	0.13	0
XLOC_001004	0.57	0.81	0.83	0.53	0.33	0.7	0.62	0.55	0.11	0.23	0.25	0.51	0.49	0.32	0.42	0.55	0.31	0.22	0.58	0.23	0.09	0.23	0.42	0.41	0.48	0.32	0.08	0	0.36	0.4	0.28	0.03	0.48	0.57	0.04	0.51	0.54	0.05	0.39	0.11	0.18	0.47	0.8	0.14	0.62	0.14	0.62	0.06	0.59
XLOC_001005	0.68	0.54	0.63	0.93	0.58	0.45	0.67	0.56	0.16	0.25	0.28	0.26	0.21	0.21	0.44	0.26	0.26	0.23	0.41	0.12	0.24	0.35	0.34	0.24	0.41	0.38	0.29	0.34	0.15	0.21	0.15	0.44	0.71	0.65	0.42	0.76	0.27	0.51	0.21	0.26	0.53	0.6	0.58	0.25	0.27	0.57	0.21	0.4	0.39
XLOC_001011	0.43	0.3	0.71	0.19	0.55	1.05	0.78	0.98	1.54	1.43	2.43	0.66	0.55	0.39	0.59	0.28	4.46	3.55	3.24	2.24	2.6	2.6	2.84	3.39	6.21	5.8	3.11	2.84	2.57	2.68	2.28	2.63	9.65	8.67	2.24	3.87	2.08	2.72	1.86	2.39	5.83	4.98	3.03	3.32	3.35	3.46	3.01	3.84	4.58
XLOC_001013	0	0.02	0	0.03	0	0.13	0.03	0.06	0.17	0.06	0.29	0.12	0.02	0.23	0.22	0.04	0.08	0.2	0.07	0	0	0	0.17	0.35	0	0	0.14	0.4	0.05	0.04	0	0	0.42	0.27	1.17	0.75	0.32	0.87	0.77	0.41	0.12	0.04	0.16	0.17	0	0.27	0.27	0.17	0
XLOC_001014	0.08	0.39	0.12	0	0.32	0.14	0.07	0.14	0.38	0.39	0.85	0.09	0.04	0.23	0.09	0.14	0.52	0.5	1.65	0.79	1.55	0.69	1.69	0.98	0.73	0.31	0.05	0	0.76	0.24	1.58	0.3	0.94	0.3	0.84	0.08	0.84	0.68	0.57	0.28	1.03	0.27	0.87	1.07	0.48	1.52	1.22	1.77	0.55
XLOC_001016	0.12	0	0.12	0.15	0.05	0.08	0.25	0.2	0.2	0.16	0.18	0.32	0.22	0.35	0.27	0.15	0.15	0.14	0.02	0.09	0.08	0	0.15	0.2	0.14	0.05	0.55	0.04	0	0	0	0.06	0.2	0.03	0.15	0.05	0.04	0.19	0.43	0	0.03	0.09	0.22	0.22	0.03	0.19	0.16	0.05	0.29
XLOC_001018	0.67	0.31	0.7	2.45	0.81	0.84	0.39	0.73	0.3	0.85	0.27	1.01	0.26	0.7	0.3	0.53	0.3	0.12	0.12	0.47	0.14	0.3	0.36	0.55	0.2	0.43	0.24	0.52	0.55	0.24	0	0.3	0.33	0.59	0.09	0.86	0.58	0.16	0.14	0.38	0.1	0.48	0.29	0.78	0.34	0.26	0.31	0.19	0.07
XLOC_001021	0	0	0	0	0	0	0	0	0.01	0	0.04	0	0	0	0	0	0.48	0.39	0.49	0.72	0.53	0.57	0.38	0.38	0.32	0.39	0.5	0.47	0.29	0.59	0.2	0.24	0.39	0.29	0.1	0.02	0	0.09	0.02	0.01	0.87	0.98	0.5	0.69	0.63	0.77	0.39	0.4	0.38
XLOC_001022	0	0	0	0	0	0	0	0	0.21	0.26	0.03	0.35	0.44	0.48	0.11	0.15	0.32	0.1	0.05	0.31	0.43	0.25	0.32	0.12	0.25	0.04	0	0.28	0.31	0.19	0.08	0.02	0.11	0.04	0.25	0.07	0.22	0.21	0.29	0.06	0.07	0.04	0.08	0.08	0.22	0	0.07	0.03	0.06
XLOC_001023	0	0	0	0	0	0	0	0	0.48	0.09	0.44	2.11	2.5	1.9	0.81	0.42	0.68	0.96	0.44	1.08	1.08	0.69	0.97	0.63	0.33	0.42	0.23	0.51	0.73	0.34	0.25	0.18	0.61	0.18	0.1	0.56	0.35	0.17	0.38	0.49	0.31	0.16	0.03	0.25	0.06	0.26	0.15	0.5	0.18
XLOC_001026	0	0.42	0.32	0.99	0.86	0.49	0.34	0.06	0.7	0	0.2	1.59	1.08	0.64	0.31	0.36	0.94	0.34	0.06	0.37	0.51	0.99	0.3	0.43	0.32	0.07	0.21	0.68	0	0.67	0	0	0.36	0.69	0.23	0.43	0.48	0.13	0.87	1.06	1	0.79	0.07	0.82	0.85	0.98	0.64	0.34	0.63
XLOC_001031	0.05	0.36	0.03	0.02	0.12	0	0.13	0.15	0.1	0.06	0.05	0.3	0.12	0	0.13	0.07	0.23	0.28	0.1	0.05	0.18	0.06	0.35	0.06	0.12	0.05	0.08	0.06	0.09	0.07	0.01	0.12	0.05	0.18	0.09	0.17	0.08	0.05	0.17	0.16	0.03	0.03	0	0	0.23	0.07	0.07	0.08	0.14
XLOC_001040	0.1	0.28	0.59	0.2	0.05	0.04	0.23	0.63	0.18	0.27	0.77	0.3	0.19	0.11	0.03	0.06	0.22	0.27	0.05	0.05	0.05	0.12	0.69	0.17	0.11	0.08	0.29	0.18	0.06	0.42	0.33	0.25	0.37	0.87	0.29	0	0	0.68	0.06	0.11	0.25	0.14	0.23	0.08	0.36	0.24	0.48	0.24	0.34
XLOC_001045	1.18	0.75	1.24	0.66	0.68	1.79	2.1	0.73	0.28	0.4	0.29	0.04	0.86	0.47	0.57	0.44	0	0	0.14	0	0.06	0.25	0	0.06	0	0.04	0.31	0	0.13	0.08	0	0	0	0.2	0.26	0.27	0	0.07	0.72	0.39	0.15	0	0	0	0.08	0	0.14	0.19	0.16
XLOC_001052	0	0	0	0.02	0	0	0	0	0.38	0.17	0.39	0.18	0	0	0.09	0.02	0.09	0.19	0.15	0.02	0.21	0.13	0.05	0.05	0.51	0.07	0.23	0	0.03	0.15	0.22	0.28	0.33	0.17	0.31	0.65	0.43	0.45	0.27	1.17	0.14	0.03	0.02	0	0.17	0	0.14	0	0.21
XLOC_001053	0	0	0	0	0	0	0	0	0	0	0	0	0	0.06	0	0	0.22	0.35	0.05	0	0	0	0	0.17	0.17	0	0.06	0	0	0	0	0	0	0	0	0	0.04	0	0	0	0	0	0	0	0.03	0	0	0	0.11
XLOC_001055	0.16	0.25	0.11	0.12	0.06	0.43	0.46	0.06	0.07	0	0.07	0	0.08	0.04	0.03	0.11	0.09	0.02	0.16	0.12	0.03	0.42	0.02	0.08	0.18	0.07	0.28	0.15	0.12	0.65	0.03	0.08	0.11	0.32	0.09	0.37	0.08	0.03	0.4	0.28	0.02	0.14	0.3	0.43	0.24	0.11	0.57	0.17	0.04
XLOC_001057	0.04	0	0	0	0.13	0.02	0	0	0	0	0.03	0	0	0.03	0.02	0.03	0.13	0	0.07	0.2	0	0.25	0.02	0.19	0	0.01	0.05	0.27	0.15	0.11	0.14	0	0	0.03	0.06	0	0	0	0	0.05	0.06	0.01	0.26	0.06	0.08	0.27	0.03	0.08	0
XLOC_001065	0	0	0	0	0	0	0	0	0	0	0	0.02	0	0	0	0	0	0	0	0.18	0	0	0	0.23	0.03	0	0.15	0	0	0.08	0	0	0	0.07	0	0	0	0	0	0	0	0	0.05	0.07	0	0.49	0	0	0
XLOC_001066	0	0	0	0	0	0	0	0	0.1	0	0.03	0	0.09	0	0	0	0.04	0	0	0	0	0	0	0.05	0	0	0.52	0	0.07	0	0	0	0	0	0.11	0.06	0.1	0	0.14	0.26	0	0	0	0	0	0	0	0	0
XLOC_001071	0	0	0	0	0	0	0	0	0.19	0.15	0.07	0.24	0.32	0.47	0.13	0.24	0.1	0	0.05	0.14	0	0.06	0.07	0.2	0.05	0	0.08	0.22	0	0	0.15	0	0	0.07	0.09	0.14	0	0	0.27	0.1	0	0	0.03	0.02	0	0.03	0.19	0.13	0.05
XLOC_001073	0	0	0	0	0	0	0	0	0	0	0	0	0	0	0	0	0	0	0	0	0.14	0	0	0	0	0.3	0	0	0.19	0	0	0.06	0.04	0	0	0	0	0	0	0	0.3	0.36	0	0.08	0.06	0	0	0.03	0.17
XLOC_001074	0	0	0	0	0	0	0	0	0.02	0	0	0	0	0	0	0	0	0	0.08	0.15	0.37	0	0.02	0	0.19	0.03	0	0.15	0	0	0	0	0.2	0.04	0.07	0	0	0.11	0	0	0.85	0.49	0.04	0.03	0.24	0.15	0.05	0.03	0.32
XLOC_001075	0	0	0	0	0	0	0	0	0	0	0	0	0	0.04	0	0	0	0	0.13	0	0.06	0	0.05	0	0.04	0	0	0	0.24	0	0	0	0	0	0	0	0	0	0	0	0.35	0.1	0	0	0.07	0.08	0.09	0	0.14
XLOC_001077	0	0	0	0	0	0	0	0	0.04	0.14	0.01	0.13	0	0.13	0.12	0.04	0.1	0.07	0.02	0	0	0.07	0.11	0.06	0	0.03	0.08	0.08	0.01	0.14	0	0.12	0.09	0.04	0	0.09	0.03	0	0	0.07	0	0	0.02	0	0.02	0	0	0	0.13
XLOC_001078	0	0	0	0	0	0	0	0	0.2	0.41	0.21	0.25	0.14	0.26	0.1	0.37	0.04	0	0	0	0.07	0.29	0.23	0.11	0	0.06	0.12	0.17	0	0	0	0.05	0.04	0.08	0	0.1	0	0.08	0	0.06	0	0	0	0	0	0	0	0	0
XLOC_001079	0.16	0.26	0.69	0.43	0.3	0.23	0.39	0.32	7.15	4.86	9.21	4.66	0.88	1.48	1.72	1.09	6.42	6.26	8.88	9.01	8.24	5.85	9.19	7.26	6.23	3.6	3.04	2.02	3.53	3.3	4.24	4.89	16.27	18.67	15.31	15.13	5.75	10.38	6.44	5.03	1.86	1.88	1.55	2.32	1.25	1.36	2.71	1.75	4.85
XLOC_001080	0	0.02	0	0.02	0	0	0	0	0.07	0.05	0.15	0	0.03	0	0.01	0.03	0.08	0.17	0.12	0.1	0.3	0.16	0.06	0.14	0.27	0.09	0.37	0.07	0.15	0.15	0.02	0.11	0.1	0.1	0.13	0.31	0.07	0.04	0.02	0.02	0.1	0.03	0.12	0.11	0	0.14	0	0.02	0.11
XLOC_001081	0	0	0	0	0	0	0	0	0	0	0.13	0.03	0	0	0	0.02	0.08	0	0.22	0.27	0.1	0.33	0.11	0.12	0	0.36	0.12	0.07	0.33	0.33	0	0	0	0.28	0.15	0.08	0.02	0.34	0.06	0	0.05	0	0.17	0.18	0.03	0	0.28	0.02	0
XLOC_001082	0	0	0	0	0	0	0.03	0.03	0	0.03	0.06	0	0.03	0	0	0	0.19	0.07	0.09	0.17	0.26	0.14	0.21	0.1	0	0.19	0.2	0.05	0.02	0.07	0.14	0.14	0.04	0.04	0.14	0	0.05	0	0.03	0	0.08	0	0.05	0.29	0	0.05	0.02	0.04	0
XLOC_001083	0	0	0.1	0	0.09	0.15	0	0.06	0.01	0.22	0.7	0	0.02	0.01	0.09	0.06	0.24	0.12	0.29	0.04	0.38	0.43	0.19	0.13	0.14	0.1	0.1	0.06	0.32	0.29	0.24	0.15	0.24	0.16	0.21	0.04	0.02	0	0	0.1	0.18	0.02	0.15	0	0.08	0.07	0.23	0.06	0.05
XLOC_001084	0	0	0	0	0	0	0	0	0	0	0.22	0.03	0	0	0	0	0.21	0	0.42	0.23	0.22	0.14	0.28	0.41	0.2	0.07	0.43	0	0.52	0	0.74	0.51	0.47	0.26	0.28	1.46	0	0	0.07	0	0	0.03	0.1	0.03	0.35	0.04	0.08	0.12	0
XLOC_001086	0.07	0.12	0	0	0.07	0.09	0.13	0.13	0.36	0.28	0.06	0	0.04	0.14	0.08	0.06	0.05	0.08	0.14	0	0.1	0.48	0.14	0.24	0.54	0.2	0.04	0.15	0.13	0.15	0.11	0.04	0.18	0.11	0.27	0	0.06	0.44	0.37	0.2	0.04	0.18	0.08	0	0.15	0.69	0.05	0.02	0.24
XLOC_001090	0	0	0.04	0.12	0.02	0	0	0.08	0.14	0.07	0.11	0	0.01	0.08	0.09	0.04	0.07	0.17	0.07	0.07	0.03	0.02	0.15	0.06	0.12	0.14	0.12	0.05	0.01	0.02	0	0.03	0.15	0.15	0.29	0.04	0.03	0.15	0.02	0.06	0.16	0.11	0.35	0.03	0.11	0.09	0.06	0.11	0.12
XLOC_001092	0	0	0	0	0	0.02	0	0	0	0	0	0	0.04	0	0	0	0	0	0	0	0	0.21	0	0	0	0.08	0.04	0	0	0.45	0.01	0	0	0.04	0	0.05	0	1.73	0	0.03	0	0.08	0	0.01	0	0.33	0.02	0	0
XLOC_001093	0.22	0.33	0.88	0.5	0.75	1.33	0.47	0.77	0.39	0.68	1.97	0.79	0.6	0.9	0.81	0.98	0.35	0.22	1.12	0.61	0.47	0.91	0.41	0.77	0.38	0.58	1.28	0.59	1	1.59	0.44	0.93	0.8	1.8	4.3	2.14	2.21	4.87	1.66	3.02	0.72	0.85	1.39	1.02	1.16	1.24	1.19	0.76	0.69
XLOC_001096	0	0	0	0.03	0	0	0	0	0	0.06	0.12	0.06	0.02	0	0	0	0.14	0.44	0.27	0.22	0	0.09	0.12	0.23	0.38	0.21	0.02	0.04	0.28	0.2	0.06	0.14	0.39	0	0.07	0.07	0	0.28	0	0.09	0.69	0.08	0.55	0	0.36	0.27	0.44	0.46	0.56
XLOC_001101	0	0	0.03	0	0	0	0.04	0.04	0.07	0	0.04	0.04	0.07	0.09	0	0	0.12	0.09	0.12	0.12	0.04	0.05	0.1	0	0	0.27	0.05	0	0.13	0	0	0	0.12	0	0.04	0.16	0	0.04	0.14	0.14	0	0	0.18	0	0	0.07	0	0.08	0.09
XLOC_001102	0	0	0	0	0	0	0	0.02	0.2	0.16	0.23	0.09	0	0.27	0.09	0.04	0.13	0.1	0.32	0.33	0.26	0.14	0.09	0.27	0.05	0.12	0.21	0.06	0.06	0	0.2	0.12	0.08	0.03	0.04	0.02	0.27	0.07	0.03	0.05	0.01	0.15	0.05	0.07	0.08	0.36	0	0.12	0.05
XLOC_001103	0.03	0.06	0	0.1	0	0.05	0.06	0.05	0.05	0	0.02	0	0.05	0.1	0	0.07	0.15	0.16	0.03	0.18	0.19	0.41	0.1	0.31	0.07	0.32	0.15	0.06	0	0.07	0.11	0.24	0.11	0.09	0	0	0.03	0	0	0.24	0.27	0	0	0.28	0	0.09	0.17	0.27	0.07
XLOC_001107	0.44	0	0.37	0.15	0.22	0.29	0.07	0.29	0.65	0.41	1.09	0.8	0.32	0.56	0.26	0.43	0.45	0.65	0.93	0.25	0.47	0.36	0.06	0.22	1.46	0.83	0.89	0.76	0.37	0.57	0.53	0.27	0.59	0.08	0.45	1.04	0.95	0.65	0.3	2.03	0.43	0.3	1.24	0.57	0.02	0.27	0.27	0.15	0.79
XLOC_001109	0.11	0.24	0.28	0.22	0.38	0.09	0.35	0.34	0.02	0.29	0.2	0.24	0.17	0.32	0.17	0.16	0.05	0.11	0.28	0.17	0.03	0.17	0.19	0.18	0.18	0.25	0.22	0.11	0.07	0.13	0.23	0.02	0.05	0.03	0.1	0	0.18	0	0	0.08	0.31	0	0.02	0.14	0.04	0.27	0.26	0.07	0.24
XLOC_001112	0	0	0	0	0	0	0	0	0	0	0.36	0.07	0	0.08	0	0.16	0	0	0	0	0	0	0	0	0	0	0	0	0	0	0	0	0	0	0	0	0	0	0	0	0	0	0	0	0	0	0	0	0
XLOC_001113	0	0	0	0.05	0	0	0	0	0.19	0.07	0.07	0.16	0.35	0.37	0.24	0.15	0	0.1	0	0	0.12	0.12	0.18	0	0.04	0.02	0	0	0.45	0.23	0.09	0.44	0	0	0	0.06	0.28	0	0.15	0	0	0	0	0	0	0.04	0	0	0.11
XLOC_001115	0	0	0	0	0	0	0	0	0.08	0.13	0.22	0.23	0.31	0.21	0.16	0.35	0.22	0.14	0.18	0.1	0.67	0.21	0.25	0.5	0.05	0	0.02	0	0.29	0.27	0.38	0.37	0.13	0.1	0.33	0.21	0.22	0.04	0.48	0.04	0.06	0.1	0.33	0.23	0.48	0.27	0.41	0.35	0
XLOC_001116	0.06	0	0	0	0	0	0	0	0	0.2	0.03	0	0.45	0.04	0.04	0	0.23	0.05	0.06	0.12	0.06	0	0	0	0	0.28	0.11	0.17	0.04	0	0	0	0	0	0.06	0	0.33	0.46	0	0	0	0	0	0	0	0	0	0	0
XLOC_001117	0	0.04	0.16	0	0	0	0	0	0.07	0.06	0.03	0	0.15	0.19	0.09	0.3	0.12	0.04	0.4	0	0.1	0.21	0	0.05	0	0.16	0	0	0.28	0.1	0.37	0	0.08	0.13	0.05	0.22	0.54	0.24	0.33	0.06	0	0	0	0.17	0.1	0.07	0	0.12	0
XLOC_001118	0.44	0.32	0.5	0.45	0.03	0.16	0.26	0.22	0.26	0.58	0.38	0.17	0.2	0.07	0.09	0.29	0.2	0.17	0.38	0.34	0.29	0.27	0.13	0.08	0.26	0.16	0.27	0.25	0.02	0.21	0.36	0.29	0.39	0.19	0.03	0.34	0.11	0.1	0.15	0.18	0.14	0.16	0.32	0.22	0.45	0.09	0.51	0.09	0.21
XLOC_001119	0	0	0	0	0	0	0	0	0.21	0.16	0.03	0.27	0.14	0.29	0.26	0.24	0.07	0	0	0.05	0.09	0	0	0	0	0.06	0.03	0	0	0	0	0.09	0	0.11	0.24	0.25	0.27	0.11	0.24	0.41	0	0	0.29	0.05	0	0.12	0	0	0.06
XLOC_001122	0.03	0.03	0	0	0.05	0	0	0.01	0.07	0	0.15	0.12	0.02	0.01	0.02	0.01	0.1	0.27	0.06	0.16	0.04	0.14	0.03	0.06	0.65	0.11	0.02	0.02	0	0	0.01	0.03	0.66	0.51	0.04	0.33	0	0.01	0.1	0.06	0.12	0.01	0.02	0.39	0	0.02	0.08	0.02	0.24
XLOC_001123	0	0	0.02	0	0	0	0	0	0.05	0.11	0	0.1	0	0	0	0.03	0.04	0.05	0.06	0.03	0	0	0.05	0	0.08	0	0	0	0	0	0	0	0.3	0.07	0	0	0	0.06	0.07	0	0.03	0	0	0.06	0	0	0.24	0	0.07
XLOC_001125	0.03	0	0	0	0	0	0	0	0.2	0.23	0.16	0.12	0.23	0.28	0.2	0.08	0.12	0	0.07	0	0.06	0	0.11	0.11	0.02	0	0.09	0	0	0	0.41	0.08	0	0.02	0.03	0.07	0	0	0.12	0.08	0	0.11	0.09	0.29	0.04	0	0	0	0
XLOC_001127	0	0	0	0	0	0	0	0	0.04	0	0	0	0	0	0	0	0	0	0	0	0	0	0.05	0	0.11	0	0	0.04	0	0	0.11	0.08	0	0	0	0.8	0	0	0	0	0.15	0.19	0	0	0	0	0	0	0
XLOC_001128	0.07	0.2	0.09	0.2	0.2	0.08	0.24	0.06	0.26	0.27	0.11	0.28	0.3	0.14	0.23	0.13	0.25	0.08	0.04	0.07	0.29	0.02	0.3	0.17	0.17	0.14	0.08	0.1	0.3	0.1	0.19	0.11	0.08	0.31	0.11	0.18	0.25	0.03	0.22	0.16	0.2	0.13	0.09	0.17	0.26	0.03	0.23	0.17	0.18
XLOC_001131	0.03	0.06	0.09	0.12	0.15	0.14	0.13	0.1	0.24	0.26	0.43	0.32	0.4	0.33	0.29	0.32	0.36	0.29	0.44	0.37	0.49	0.45	0.55	0.46	0.27	0.29	0.68	0.42	0.54	0.61	0.43	0.3	0.18	0.19	0.29	0.41	0.19	0.32	0.35	0.22	0.29	0.39	0.71	0.78	0.95	0.51	0.7	0.56	0.23
XLOC_001132	0	0.15	0.25	0.67	0.22	0.19	0	0.5	0.42	0.76	1.15	0.6	0.66	0.18	0.14	0.51	0.29	0.31	0.82	0.55	0.4	0.27	0.05	0.19	0.16	0.33	0.26	0.54	0.1	0	0.07	0.48	0.66	0.72	0.94	0.55	0.38	0.49	0.29	0.92	0.17	0.48	0.26	0.43	0.39	0.45	0	0.32	0.21
XLOC_001133	0	0	0	0	0	0	0	0	0	0	0.52	0.04	0.11	0.05	0.05	0	0.6	0.65	0.17	0.65	0.95	0.46	0.77	0.36	1.43	0.35	0.66	0.35	0.24	0.98	0.05	0.08	0.06	0.34	0.27	0.12	0.07	0.48	0.34	0	0	0.32	0.14	0.36	0.02	0.33	1.25	0.43	0.43
XLOC_001134	0.76	0.51	1.23	0.66	1.61	1.61	1.43	1.11	1.34	0.94	0.71	0.66	1.48	1.63	0.63	0.64	0.68	0.85	0.08	0.48	0.14	0.14	0.18	0.03	0.38	0.69	0.09	0.26	0.12	0.25	0	0.14	0.33	0.42	0.11	0.33	0.46	0.08	1.06	0.56	0.06	0	0	0	0.14	0.09	0.21	0.1	0.73
XLOC_001135	0.07	0.1	0.03	0.1	0	0.17	0.04	0.02	0.08	0.03	0.26	0.08	0.07	0.15	0.21	0.22	0.02	0.22	0.1	0	0	0	0.04	0	0.2	0.03	0.05	0.13	0	0.06	0.17	0.09	0.24	0.02	0.41	0.19	0.1	0.25	0.42	0.16	0	0.22	0	0.04	0.06	0	0.33	0.07	0.41
XLOC_001138	0.08	0.05	0.04	0.2	0	0.06	0.02	0.04	0.1	0.09	0.1	0.68	0.07	0.11	0.26	0.15	0.23	0.95	0.15	0.81	0.18	0.06	0.64	0.34	0.79	0.63	0.11	0.96	0.02	0.13	0.91	0.54	0.4	0.3	0.14	0.64	0.02	0.08	0.41	0.51	1.04	0.23	0.2	1.14	0.03	0.08	0.36	0.32	0.71
XLOC_001140	0.12	0	0.04	0.09	0.06	0	0	0	0	0	0.03	0	0.06	0	0	0.03	0	0	0	0	0	0	0.05	0	0	0	0	0	0.55	0.07	0	0	0	0	0	0	0	0.06	0	0.07	0	0	0	0	0	0.04	0	0	0
XLOC_001142	0.96	1.21	0.82	0.99	0.06	0.57	0.27	0.63	0	0	0.12	0.16	0.13	0	0.3	0.14	0.13	0.18	0.06	0.23	0.54	0.22	0.24	0.31	0.03	0.26	0.34	0.09	0.15	0.11	0	0.15	0.39	0.13	1.73	1.29	1.08	0.06	1.32	0.34	0.2	0	0.17	0	0	0.18	0.41	0	0.4
XLOC_001143	0.48	0.69	2.86	0.47	7.33	1.81	5.92	4.8	2.55	2.23	5.27	4.17	4.09	8.55	6.3	5.81	0.27	0	0.27	0.26	0.1	0.13	0.55	0.41	0.36	0.41	0.81	0.42	0.23	0.61	1.84	0.89	1.05	1.47	3.57	2.78	4.8	4.83	2.55	7.15	0.03	0.03	0.09	0.11	0.22	0.39	0.98	1.31	0
XLOC_001144	0	0.65	0.46	0.71	1.52	0.39	0.35	0.97	0.15	0.07	0	0.27	0.24	1.23	0.32	1.3	0	0	0	0	0	0.08	0	0	0	0	0.25	0	0	0.23	0	0.08	0	0	0.36	0.38	0	0	0	0.87	0	0	0	0	0.11	0	0	0.17	0
XLOC_001147	0	0	0	0.48	0	0.61	2.74	0.51	0	0	0.02	1.53	0.05	2.79	4.23	0.95	0.05	0.01	0.03	0.96	0.07	1.34	3.95	0.26	0	0.01	0	0.93	0.03	0.9	2.33	0.6	0	0.01	0.02	0.94	0.07	1.8	5.29	0.53	0	0	0.01	0.48	0.02	0.72	3.23	0.52	0
XLOC_001148	0.01	0.02	0.22	0.08	0.06	0.19	0.05	0	0.28	0.1	0.45	0.43	0.18	0.24	0.29	0.22	0.2	0.07	0.25	0.18	0.01	0.12	0.17	0.05	0.07	0.03	0.18	0.22	0.01	0.09	0.09	0.17	0.17	0.35	1.06	0.8	0.39	0.7	0.43	0.57	0.06	0.08	0.06	0.4	0.12	0.09	0.42	0.19	0.05
XLOC_001153	1.42	1.71	1.12	1.34	1.13	1.09	1.89	2.73	1.07	0.91	1.58	1.24	0.87	1.14	1.3	1.35	1.14	0.86	1.52	0.6	0.53	0.41	1.14	1.29	0.66	0.72	1.05	0.92	0.34	0.52	0.92	0.93	0.87	0.71	0.81	0.43	0.56	0.57	1.83	1.62	0.78	1.25	1.08	0.97	1.11	0.27	1.31	2.05	0.74
XLOC_001155	0.82	0.54	0.4	0.53	0.97	1.09	0.52	0.9	0.01	0	0.01	0.02	0	0	0	0.04	0	0	0	0.02	0.04	0.06	0	0.15	0	0	0.01	0	0	0.16	0	0.06	0.11	0.01	0.06	0.02	0.02	0.15	0	0	0	0	0	0	0.01	0.09	0.01	0.12	0
XLOC_001157	0.23	0	0.13	0.14	0.06	0	0.11	0.21	0.24	0.09	0.12	0	0.09	0.07	0.32	0.1	0.04	0.27	0	0.06	0.05	0.07	0	0	0	0.26	0.29	0	0	0	0.22	0.14	0	0.39	0.11	0.11	0	0	0.27	0.13	0.39	0.86	1.27	0.32	0.21	0.14	0.24	0.75	0.07
XLOC_001158	0.02	0	0	0	0	0	0	0	0.08	0	0.09	0.07	0.27	0.04	0.06	0	0.03	0.01	0.04	0	0.05	0.04	0	0.03	0	0.08	0.16	0	0.09	0.01	0	0.11	0.16	0.01	0.17	0.11	0	0.13	0	0.04	0.06	0	0	0.01	0	0.11	0.02	0.07	0.15
XLOC_001159	0.76	0.83	1.04	1.68	0.81	1.59	1.34	1.61	0.32	0.47	0.71	1.48	1	0.99	0.77	0.61	0.44	0.15	0.78	1.21	0.96	0.24	0.37	0.25	0.15	0.31	0.38	1.41	0.66	0.22	0.1	0.13	0.18	0.36	0.35	0.62	0.32	0.19	0.28	0.11	0.09	0.53	0.74	1.15	0.68	0.14	0.15	0.07	0.2
XLOC_001162	0.31	0.31	0.89	0.52	0.14	0.23	0.6	0.28	0.04	0.25	0.09	0.04	0.09	0	0.05	0.08	0.29	0.04	0	0	0.11	0.06	0.08	0.04	0	0	0.05	0	0.12	0.13	0	0.03	0.02	0.11	0	0	0	0.2	0.03	0.05	0.04	0.04	0.16	0	0	0	0.05	0.03	0
XLOC_001164	0	0	0	0.44	0.12	0.05	0	0.17	0	0	0.1	0	0	0	0	0	0	0	0	0	0.06	0	0	0	0	0	0	0	0	0	0	0	0	0	0.18	0	0.16	0	0	0	0	0	0	0	0	0	0	0	0
XLOC_001166	0.53	0.81	0.67	0.31	0.32	0.79	0.61	0.38	0.07	0.09	0.13	0.06	0.1	0.23	0.25	0.03	0.03	0	0.18	0.12	0.04	0.07	0.19	0.09	0.03	0.08	0.31	0.05	0.07	0.43	0.05	0.1	0.03	0.12	0.11	0	0.01	0.19	0.24	0.15	0.01	0.07	0.18	0.1	0.06	0.16	0.23	0.09	0.05
XLOC_001167	0	0.03	0.02	0.04	0	0	0	0.08	0.05	0.02	0.08	0.17	0.25	0.17	0.03	0.16	0.29	0.05	0.12	0.13	0.31	0	0.04	0.02	0.22	0.18	0	0	0.31	0.16	0.02	0.06	0.23	0.32	0.13	0.25	0.39	0.26	0.05	0.31	0.08	0.22	0.03	0.33	0.04	0.01	0	0	0.08
XLOC_001170	0.21	0.46	0.53	0	0.78	0.82	0.63	0.98	0.09	0.11	0.82	0.03	0.85	0.42	0.41	0.76	0.08	0.04	0.53	0	0.81	1.41	0.42	0.72	0.21	0.14	0.3	0	1.05	0.63	0.23	0.78	0.11	0.19	0.34	0	0.59	0.71	0.31	0.53	0.17	0.12	0.65	0	0.62	0.67	0.25	1.32	0.42
XLOC_001177	0.94	0.68	0.17	0.3	0.05	0.21	0.4	0.21	0.83	0.81	0.35	0.57	0.23	0.33	0.23	0.44	0.63	0.57	0.32	0.61	0.09	0.18	0.27	0.06	0.3	0.16	0.26	0.06	0.04	0.2	0.05	0.1	0.66	0.66	0.34	0.21	0.02	0.55	0.22	0.16	0.28	0.42	0.16	0.16	0.13	0.23	0.33	0.13	0.38
XLOC_001181	0	0	0.08	0	0.06	0.2	0	0.03	0.02	0.06	0	0.02	0.02	0.06	0.06	0.13	0.14	0.07	0	0	0.26	0.14	0.18	0.1	0	0.33	0.02	0.1	0.16	0.19	0.02	0.05	0.12	0.11	0	0	0	0.09	0	0.06	0.42	0.06	0.88	0.22	0.86	0.46	0.89	0.5	0.16
XLOC_001183	0	0	0	0	0	0	0	0	0.17	0.06	0	0	0.03	0	0	0.03	0	0.04	0.17	0	0	0	0	0.05	0.03	0.03	0	0.18	0	0.34	0	0	0.04	0	0	0	0	0	0	0.06	0	0	0	0	0	0	0	0	0
XLOC_001185	0.1	0.16	0.07	0.08	0	0	0	0.13	0	0	0.13	0.05	0	0	0.05	0	0	0	0.15	0.14	0	0	0	0	0.03	0.11	0.14	0	0	0.06	0	0.15	0.39	0	0	0.1	0.04	0.4	0.11	0	0.03	0.05	0	0.02	0.09	0	0	0.1	0.11
XLOC_001187	0.95	0.87	0.51	0.71	0.51	0.66	1.35	0.67	0.25	0.27	0.25	0.2	0.03	0.21	0.21	0.22	0.34	0.18	0.29	0.09	0.13	0.23	0.15	0.04	0.03	0.21	0.16	0.05	0.21	0.4	0.1	0	0.24	0.11	0.53	0.23	0	0.2	0.16	0.16	0.1	0	0.21	0.02	0	0	0.16	0.19	0.16
XLOC_001191	0.74	1.56	0.81	1.47	1.54	0.94	0.48	1	0.94	1.21	0.47	0.55	0.47	0.42	0.65	0.45	0.84	0.4	0.13	0.46	0.35	0.42	0.69	0.48	0.44	0.43	0.29	0.43	0.3	0.65	0.47	0.72	0.66	0.61	0.49	0.3	0.93	0.94	0.4	0.2	0.53	0.71	0.1	0.66	0.18	0.31	0.53	0.44	0.24
XLOC_001192	0	0.03	0.09	0	0.09	0.11	0.08	0	0.15	0.25	1.28	0.6	0.43	0.89	0.27	0.41	0.41	0.61	0.44	0.3	0.44	0.11	0.73	0.6	0.32	0.22	0.59	0.32	0.47	0.24	0.14	0.16	0	0	0	0.51	0.15	0.23	0	0.2	0	0	0.02	0	0.05	0	0	0.03	0.45
XLOC_001194	0.04	0.06	0.09	0	0.25	0.26	0	0.11	2.63	2.45	1.87	3.73	4.52	4.18	2.1	2.45	0.76	0.49	0.17	0.04	0.19	0.16	0.07	0.18	0.02	0.26	0	0.31	0.24	0	0.05	0.08	0.28	0.35	0.44	1.34	2.43	1.28	1.83	0.63	0.16	1.26	0.17	0.41	0.46	0.1	0.55	0.26	0.19
XLOC_001195	0	0	0.04	0	0	0	0	0	0.15	0.32	0.51	0.03	0	0.03	0.03	0.18	0.13	0	0.13	0.06	0.06	0.08	0.1	0	0.03	0	0.17	0.35	0.31	0	0	0	0	0.55	0.17	0.12	0.16	0.13	0	0.07	0	0.07	0	0	0.04	0	0	0	0.07
XLOC_001198	0	0	0	0	0	0	0	0	0	0.03	0.07	0	0	0	0	0	0.1	0	0.03	0.06	0	0.07	0	0.3	0	0	0	0	0	0	0.06	0	0	0.02	0.05	0	0	0	0	0	0.05	0	0	0	0	0	0	0	0.03
XLOC_001200	0.05	0.13	0.1	0.13	0.19	0.28	0.2	0.22	0.08	0.16	0.13	0.16	0.13	0.05	0.15	0.33	0.18	0.08	0.19	0.21	0.15	0.2	0.22	0.28	0.21	0.25	0.29	0.18	0.31	0.29	0.07	0.32	0.2	0.14	0.28	0.29	0.14	0.06	0.13	0.43	0	0.07	0.2	0.28	0.39	0.18	0.09	0.22	0.03
XLOC_001203	0	0	0	0	0	0	0.14	0	0	0	0	0	0	0	0.06	0	0	0.09	0.19	0.11	0.24	0.05	0.3	0.13	0	0	0	0	0.21	0	0.1	0	0	0	0.04	0	0	0	0	0	0	0.02	0	0	0.09	0	0	0	0
XLOC_001205	0.04	0.17	0	0	0	0	0	0	0	0.02	0	0.03	0.02	0.02	0	0.02	0.16	0.1	0	0.04	0.02	0.15	0	0.07	0.09	0.03	0	0.09	0.1	0	0.16	0	0.02	0.09	0.02	0	0.04	0.13	0.02	0	0.05	0	0.04	0	0	0	0	0	0.05
XLOC_001210	0	0.07	0	0	0	0	0	0.05	0	0.06	0.11	0.03	0.12	0.03	0.06	0.09	0.04	0.12	0	0	0	0	0	0.09	0	0.12	0.6	0.53	0.07	0.32	0	0	0.04	0	0	0.05	0	0.11	0	0	0.06	0.03	0.03	0.16	0.03	0.13	0	0	0.12
XLOC_001212	0	0	0	0	0	0	0	0	0.06	0.1	0.27	0.26	0.23	0.39	0.31	0.35	0.12	0.09	0.17	0.21	0.11	0.18	0.25	0.31	0.15	0.09	0.3	0.14	0.15	0.44	0.29	0.15	0.2	0.15	0.64	0.02	0.02	0	0.17	0.03	0.35	0.28	0.32	0.16	0.28	0.32	0.2	0.32	0.25
XLOC_001218	0.05	0.39	0.31	0.19	0.09	0.12	0.44	0.21	0.25	0.53	0.3	0.1	0.28	0.38	0.13	0.39	0.24	0	0.29	0.05	0	0	0.08	0	0	0.16	0.05	0	0	0.11	0	0.21	0	0.46	0.04	0.19	0.08	0	0.17	0.59	0.11	0	0	0	0	0.17	0.06	0.03	0
XLOC_001219	1.89	3.67	2.51	3.83	3.07	4.94	2.87	2.53	1.38	1.24	1.52	1.95	2.76	3.51	2.79	1.65	0.97	0.72	0.37	0.58	1.57	1.74	1.27	1.08	0.78	1.04	0.84	0.57	1.31	1.88	0.55	0.92	0.65	2.34	1.74	0.55	0.57	1.41	1.35	0.98	1.03	0.66	1.14	0.67	1.26	1.34	2.12	1.46	0.53
XLOC_001227	0	0.17	0	0.23	0	0.15	0.08	0.19	0.1	0.2	0.42	0.18	0.05	0.12	0.23	0.02	0	0.19	0.55	0.04	0.19	0.2	0.23	0.14	0.05	0	0.24	0.02	0.13	0.03	0.09	0.05	0.09	0.22	0.28	0.08	0	0.09	0.15	0.47	0.35	0.07	0.02	0.19	0	0.2	0.06	0.34	0.09
XLOC_001231	0	0	0.13	0.03	0	0.04	0	0.12	0.26	0.23	0.18	0.16	0.07	0.12	0.05	0.13	0	0.27	0.44	0.3	0.39	0.26	0.42	0.11	0.22	0.1	0.29	0.52	0.05	0.13	0.14	0.29	0.28	0.06	0	0.17	0	0.05	0	0.2	0.02	0.05	0.05	0.07	0.21	0.13	0.18	0.09	0.1
XLOC_001232	0	0	0	0.09	0	0	0.04	0	0.58	0.27	0.14	0.52	0.21	0.13	0.31	0.09	0.74	0.74	0.32	0.89	0.83	0	0.88	0.27	0.58	0.81	0.04	0.52	0.1	0.09	0.3	0.1	0.34	0.59	0.48	1.01	1.88	0.16	1.75	0.58	0.11	0.35	0.09	0.2	0.24	0.02	0.43	0	0.63
XLOC_001238	0.01	0.55	0.01	0.01	0	0	0.03	0.03	0.21	0.74	0.03	0.05	0.01	0	0	0.07	1.53	0.46	0.16	0.11	0.2	0.17	0.15	0.06	0.37	1.35	0.11	0.13	0.13	0.06	0.13	0.05	0.28	1.36	0.05	0.07	0.03	0.02	0.04	0.02	0.51	1.32	0.11	0.1	0.06	0.06	0.08	0.28	0.32
XLOC_001252	0.23	0.05	0.22	0.06	0.08	0.07	0.5	0.14	0.78	0.62	0.28	0.25	0.55	0.44	0.86	0.32	0.11	0.06	0.24	0.38	0.85	0.76	0.43	0.27	0.22	0.13	0.22	0.04	0.1	1.44	0.67	0.62	0.28	0.75	0.29	0.76	0.6	2.02	0.9	1.15	0	0.21	0.13	0.2	0.37	0.75	0.74	0.26	0.35
XLOC_001254	0.49	0.31	0.32	0.29	0.16	0.35	0.19	0.4	0	0.09	0.15	0.2	0.31	0.42	0.09	0.09	0.44	0.19	0	0.04	0.04	0.15	0	0.07	0	0.07	0.05	0.15	0.08	0	0	0.03	0.09	0.09	0	0	0.04	0.21	0.05	0	0.23	0	0.25	0.43	0.22	0.15	0.47	0.08	0.09
XLOC_001255	16.16	25.95	12.32	21.28	3.8	8.72	19.11	24.5	0.02	0	0.02	0.02	0	0	0.04	0	0	0.03	0.08	0	0	0	0	0	0	0	0	0	0	0	0	0	0	0	0	0	0.03	0.04	0.23	0.14	0	0	0	0	0	0	0	0.03	0
XLOC_001271	0	0.09	0	0	0	0.06	0	0	0.04	0.03	0.17	0.18	0.11	0.15	0.18	0.35	0.05	0	0	0	0.12	0.08	0	0.23	0.15	0	0	0.17	0.08	0	0.11	0.04	0.24	0	0.31	0.13	0	0.21	0.08	0.22	0	0	0	0.07	0	0	0.05	0	0
XLOC_001281	0.42	0.35	0.14	0.11	0.28	0.2	0.09	0.58	0.25	0.05	0.17	0.05	0.05	0.08	0.13	0.24	0.23	0.65	0.05	0.32	0.08	0.57	0	0.04	0.29	0.49	0.11	0	0.03	0.25	0	0.23	0	0.17	0.26	0.14	0.12	0.19	0.05	0.79	0.34	0.21	0.29	0.07	0	0.2	0	0.1	0.11
XLOC_001282	0.36	0.2	0.52	0.23	0.21	0.75	0.2	0.19	0.13	0.11	0.11	0	0.2	0.12	0.08	0.25	0.05	0	0	0.07	0	0	0.17	0.19	0	0.08	0.24	0.19	0	0	0	0.4	0	0.11	0	0.07	0.37	0	0.33	0	0	0.47	0.24	0.07	0.09	0	0	0.29	0.16
XLOC_001293	0.11	0.1	0.06	0.22	0.61	0.68	0.49	0.38	0.17	0.1	0.09	0.31	0.9	0.64	0.3	0.65	0.04	0.02	0	0.06	0.05	0.03	0	0.15	0.06	0.03	0	0	0.09	0.02	0.06	0.09	0.08	0.02	0.05	0.11	0.12	0.09	0	0.13	0.09	0.12	0.1	0.09	0.28	0.39	0.15	0.19	0
XLOC_001296	0.29	0.39	0.21	0.49	0.42	0.86	0.13	0	0.08	0.03	0.07	0.13	0.05	0.24	0.16	0.06	0.1	0.18	0.14	0.37	0.17	0.17	0.38	0.29	0.29	0.08	0.05	0	0.06	0.28	0.13	0.15	0.03	0.18	0.18	0.05	0.25	0.2	0.17	0.16	0.39	0.42	0.13	0	0	0.11	0.26	0.19	0.16
XLOC_001297	1.32	1.36	1.26	1.37	1.32	1.26	0.91	1.1	0.3	0.38	0.32	0.29	0.59	0.63	0.4	0.13	0.12	0.14	0.26	0.11	0.19	0.39	0.22	0.18	0.19	0.35	0.29	0.37	0.35	0.47	0.07	0.03	0.23	0.43	0.54	0.43	0.34	0.6	0.45	0.55	0.18	0.21	0.27	0.19	0.18	0.26	0.06	0.25	0.18
XLOC_001299	2.05	1.56	1.66	1.82	2.35	3.36	2.87	3.67	0.13	0.4	0.13	0.23	0.25	0.39	0.21	0.1	0.27	0.4	0.69	0.42	0.66	0.42	0.2	0.22	0.22	0.28	0.22	0.36	0.21	0.33	0.78	0.29	0.46	0.06	0.04	0.21	0.18	0	0.1	0.1	0.21	0.21	0.36	0.34	0.15	0.31	0.06	0.26	0.19
XLOC_001311	0	0.04	0.14	0	0	0.05	0.06	0	0.04	0	0.07	0.03	0.03	0.07	0	0.15	0.14	0.05	0.06	0.12	0	0	0	0.22	0	0.03	0.57	0.03	0	0.19	0.17	0.23	0.18	0.19	0	0.12	0	0	0.22	0.21	0.14	0	0.18	0.26	0.45	0.08	0.39	0.04	0.07
XLOC_001313	0.03	0.06	0	0	0	0	0	0	0.15	0.18	0.31	0.03	0.17	0.19	0.02	0.04	0.04	0.1	0.03	0.03	0	0.11	0	0.13	0	0	0.07	0	0	0.15	0	0.02	0	0.09	0.12	0.06	0.13	0.19	0	0	0	0.12	0.07	0.02	0.09	0	0.04	0.02	0
XLOC_001314	0.53	1.04	0.65	1	0.73	0.96	0.83	1.45	0.31	0.28	0.3	0.11	0.2	0.21	0.15	0.18	0.11	0.74	0.21	0.31	0.29	0	0.25	0.45	0.39	0.26	0.45	0.08	0	0.09	0.37	0.62	0.23	0.12	0.25	0.31	0.36	0.27	0.55	0	0.12	0.12	0.33	0.45	0.31	0.89	0.4	0.36	0
XLOC_001316	0.14	0.23	0.35	0.03	0.1	0.09	0.03	0.15	0.06	0	0.04	0	0	0	0	0	0.05	0	0	0	0	0	0.03	0.03	0	0	0	0	0	0	0	0	0.1	0	0	0	0.06	0.21	0.08	0.04	0	0	0.02	0	0	0	0.05	0	0
XLOC_001319	0.43	0.32	0.16	0.72	1.88	1.01	0.16	0.69	0.28	0.52	0.43	0.62	1.31	1.18	0.6	0.8	0.22	0.37	0.4	1.06	0.63	0.26	0.14	0.33	0.9	0.33	0.32	0.32	0.73	0.16	0.26	0.53	0.79	0.26	0.2	0.25	0.56	0.31	0.1	0.2	0.36	1.14	0.88	0.26	0.82	0.42	0.12	1.35	0.2
XLOC_001323	0	0	0	0	0	0	0	0	0	0	0.19	0	0.02	0	0	0	0	0.07	0.06	0	0.13	0	0	0.12	0	0	0.05	0	0	0	0	0.03	0	0	0.34	0.06	0	0	0	0.1	0	0	0	0	0.05	0	0	0.08	0
XLOC_001326	0.53	0.42	0.51	0.35	0.56	0.3	0.6	0.54	0.67	0.53	0.64	0.65	0.66	0.57	0.41	0.43	0.28	0.2	0.44	0.47	0.16	0.16	0.38	0.11	0.07	0	0.47	0.11	0.16	0.18	0.02	0.13	0.19	0.32	0.29	0.64	0.19	0.14	0.46	0.25	0.22	0.05	0.12	0.18	0.29	0.16	0.3	0.42	0.49
XLOC_001327	0.04	0.08	0.21	0.26	0.12	0.43	0.72	0.29	0	0.39	0.19	0.24	0.11	0.4	0.05	0.14	0.21	0.41	0.21	0.28	0.67	0.3	0.95	0.32	0	0.09	0.28	0.17	0	0.15	0.58	0.3	0	0.15	0.08	0	0	0.26	1.01	0	0.07	0.27	0.42	0.04	0.47	0.27	0	0	0
XLOC_001329	0.12	0.23	0.1	0.11	0.19	0.07	0.1	0.05	0.21	0.2	0.2	0.07	0.12	0.19	0.31	0.24	0.16	0.13	0.12	0.15	0.18	0.3	0.37	0.41	0.13	0.62	0.19	0.26	0.33	0.41	0.28	0.44	0.31	0.63	0.34	0.43	0.25	0.3	0.49	0.54	0.32	0.67	0.14	0.23	0.27	0.25	0.62	0.61	0.17
XLOC_001333	0.2	0.2	0.14	0.23	0.49	0.34	0.36	0.29	0.02	0.09	0.12	0.24	0.3	0.24	0.04	0.08	0.07	0	0.1	0.16	0.42	0.28	0.11	0.31	0	0.05	0.15	0.03	0.37	0.08	0.18	0.06	0.24	0.12	0.15	0.58	0.17	0	0.34	0.34	0.16	0.04	0.15	0.27	0.22	0.02	0.13	0.16	0.22
XLOC_001340	0	0	0.04	0	0	0	0.11	0	0.07	0.68	0	0.28	3.87	0.23	0.36	0.17	0	0	0	0	0	0	0	0	0	0.03	0.13	0.12	0	0	0	0	0.04	0.13	0	0	0.2	0	0	0	0	0.13	0.03	0	0	0	0	0.08	0
XLOC_001345	0	0	0	0	0.04	0	0	0	0.05	0.47	0.04	0.04	0.02	0.04	0.09	0.05	0.03	0	0	0	0.04	0	0	0	0	0	0.02	0	0.15	0	0	0	0.25	0.29	0.37	0.34	0.1	0.77	0.05	0.22	0	0	0	0	0	0.02	0	0.05	0.09
XLOC_001346	0.12	0.49	0.7	0.1	0.09	0.73	0.14	1.05	0.16	0.75	1.6	0.03	0.51	0.57	0.45	1.65	0.37	0.14	1.88	0.03	0.11	0.59	0.22	0.83	0.03	0.17	1.14	0	0.25	0.85	0.31	0.78	0.15	0.45	1.68	0	0	0.16	0.42	1.17	0.44	0.52	1.6	0.08	0	0.95	0.12	1.5	0.1
XLOC_001348	0.11	0.22	0	0.04	0	0.14	0.1	0.05	0	0.06	0.37	0.09	0.03	0.03	0.03	0	0	0.04	0.11	0.11	0	0.13	0.22	0.24	0.19	0	0.19	0	0	0.03	0	0.44	0	0.08	0.05	0	0.14	0.17	0.13	0.19	0	0.12	0.03	0	0.39	0	0.19	0	0.06
XLOC_001358	85.31	59.46	88.85	55.13	16.81	30.21	24.82	37.29	18.53	14.29	24.69	16.4	15.25	25.29	9.72	13.57	34.75	132.72	57.71	38.04	154.43	71.11	41.11	68.16	16.82	21.24	25.57	13.56	41.59	20.66	12.05	35.77	19.19	33.65	423.82	259.58	196.34	83.98	145.89	63.82	9.76	5.33	20.88	9.72	13.9	28.07	6.3	10.07	134.33
XLOC_001364	0.51	0.46	0.58	0.73	0.42	0.58	0.74	0.56	0.17	0.18	0.13	0.25	0.16	0.02	0.14	0.24	0.12	0.13	0.04	0.12	0.19	0	0.17	0.11	0.07	0.16	0.33	0.11	0.16	0	0.11	0.16	0.46	0.19	0.08	0.21	0	0	0.39	0.33	0.54	0.49	0.09	0.19	0.7	0.59	0.11	0.14	0.05
XLOC_001365	0.33	0.15	0.4	0.32	0	0	0.1	0.07	0.3	0.12	0.13	0.14	0.1	0.04	0.1	0.17	0.03	0.46	0	0.5	0	0.18	0.23	0.06	0.19	0.02	0.02	0	0.25	0.46	0.04	0.05	0.78	0.08	0.24	0.22	0.16	0	0.09	0	0.14	0.08	0.12	0.35	0	0.49	0.3	0.05	0.33
XLOC_001369	0.48	0.46	0.29	0.11	0.07	0.18	0.38	0.3	0.36	0.5	0.32	0.32	0.7	0.31	0.08	0.28	0.54	0.74	0.21	0.13	0.43	0.08	0.16	0.76	1.8	0.86	0.23	0.25	0.55	0.49	0.29	0.25	1.09	0.86	0.32	0.27	0.18	0.35	0	0.46	0.41	0.3	0.11	0.34	0.44	0.16	0.09	0.28	0.54
XLOC_001378	0.68	0.37	0.45	0.43	0.13	0.31	0.41	0.24	0.08	0.12	0.28	0.02	0.05	0.1	0.2	0.26	0.03	0.03	0.14	0.04	0	0.11	0	0.08	0	0.05	0.03	0	0	0.24	0.1	0.11	0.07	0.03	0.08	0.04	0.08	0.19	0.16	0.05	0.17	0.07	0.1	0.27	0.13	0.08	0.06	0.06	0.1
XLOC_001389	0.18	0.32	0.34	0.52	0.29	0.1	0.05	0	0.17	0.72	0.03	0.25	0	0.07	0.4	0.24	0.13	0.23	0	0.06	0	0	0.19	0.1	0.23	0.72	0.27	0.12	0	0	0.19	0.07	0.13	0.18	0	0.12	0	0.12	0.28	0.47	0.07	0.07	0	0	0	0.22	0.16	0	0
XLOC_001394	0.5	0.48	0.62	0.43	0.7	1.05	0.43	0.73	0.35	0.34	0.37	0.52	0.39	0.38	0.43	0.6	0.45	0.42	0.74	0.53	0.97	0.38	0.7	0.61	0.26	0.13	0.59	0.63	0.33	0.56	0.55	0.72	0.32	0.34	0.1	0.02	0.2	0.22	0.44	0.31	0.34	0.2	0.33	0.35	0.31	0.48	0.47	0.5	0.43
XLOC_001395	0.53	0.96	1.06	0.5	0.72	1	0.68	0.7	0.37	0.89	0.57	0.45	0.37	0.48	0.5	0.46	0.04	0.32	0.37	0.46	0.19	0.58	0.33	0.5	0.24	0.06	0.59	0.36	0.36	0.31	0.45	0.32	0.34	0.23	1.13	0.77	0.05	0.33	0	1.01	0.52	0.4	0.35	0.4	0.22	0.51	0.32	0.61	0.24
XLOC_001398	0.05	0.07	0	0	0	0	0.19	0.09	0.03	0	0.05	0	0.06	0.03	0	0.03	0	0	0	0.05	0.09	0	0.04	0.09	0	0	0.09	0	0.19	0.18	0	0	0	0.11	0.24	0	0.09	0	0.48	0	0.03	0.03	0	0.03	0.06	0	0	0	0
XLOC_001403	0	0.06	0.13	0.07	0.27	0	0.25	0.08	0.08	0	0.14	0.22	0.25	0.05	0.05	0.13	0.03	0	0.14	0.27	0.13	0.06	0.07	0.16	0.13	0.25	0.21	0.26	0	0.06	0.1	0.57	0.07	0.17	0.17	0.45	0	0.19	0	0.31	0	0.1	0.31	0.28	0.16	0.08	0.06	0.78	0
XLOC_001409	0.35	0.31	0.22	0.36	0.17	0.21	0.26	0.25	0.08	0.47	0.13	0.37	0.28	0.2	0.21	0.18	0.4	0.8	0.35	0.71	0.35	0.21	0.5	0.48	0.84	0.7	0.41	0.45	0.82	0.68	0.11	0.11	0.3	0.1	0.45	0.07	0.06	0.86	0.4	0.12	1.26	0.63	0.18	0.49	0.43	0.36	0.19	0.24	0.47
XLOC_001411	0	0.01	0.01	0.14	0.05	0.05	0.4	0.03	0.1	0.15	0.14	0.26	0.65	0.49	0.49	0.28	0.24	0.15	0.1	0.12	0.25	0.08	0.17	0.13	0.17	0.22	0.16	0.25	0.07	0.05	0.08	0.07	0.19	0.27	0.02	0.23	0.17	0.04	0.23	0.04	0.08	0.08	0.02	0.03	0.06	0.12	0.07	0.05	0.18
XLOC_001413	0.12	0.14	0.13	0.07	0.09	0.08	0.17	0.19	0.26	0.27	0.08	0.16	0.21	0.02	0.07	0	0.11	0.07	0.12	0.12	0.22	0.04	0.14	0.08	0	0.07	0.14	0.22	0.23	0.07	0	0.06	0.02	0.11	0.11	0.15	0.23	0	0.07	0	0	0.07	0.13	0.21	0.02	0	0	0.04	0.07
XLOC_001415	0	0	0	0.05	0.45	0.25	0.05	0.1	0.07	0.09	0.09	0.24	0.22	0	0.19	0.23	0.29	0.13	0.17	0.28	0.52	0.14	0.18	0.3	0.93	0.69	0.45	1.22	0.75	0.69	0.93	0.92	0.08	0	0.64	0.67	0.35	0.53	0.4	0.26	0	0.35	0.03	0.12	1.23	0.59	0.94	0.35	0
XLOC_001417	0.03	0.02	0.05	0	0.03	0.09	0	0	0.04	0.16	0.04	0.04	0.06	0	0.13	0.02	0.02	0	0.07	0.07	0.03	0	0.06	0.03	0	0	0.2	0	0.11	0.02	0.19	0	0.03	0	0.45	0.24	0.39	0	0.08	0	0.06	0	0.23	0	0	0.08	0	0	0.04
XLOC_001419	0.12	0.08	0.56	0.33	0.12	1.08	0.16	0.11	0.28	0.25	0	0	0.06	0	0.13	0.14	0.09	0.05	0	0	0.22	0	0.1	0.26	0	0.16	0.13	0	0.15	0	0.03	0.11	0.09	0.04	0.78	0.06	0.36	0.19	0.62	0.4	0	0.07	0.33	0.06	0.07	0	0.16	0	0
XLOC_001420	0.62	0.86	0.13	0.56	0.22	0.3	0.53	0.43	0.52	0.37	0.02	0.12	0.59	0.37	0.24	0.33	0	0.07	0.18	0.04	0.04	0.32	0.03	0.3	0.39	0.19	0.12	0.23	0.44	0.26	0.64	0.13	0.29	0.13	0.29	0.09	0.23	0.32	0.31	0.05	0.17	0.05	0.25	0.49	0.26	0.11	0.18	0.21	0
XLOC_001434	0	0	0	0	0	0	0	0	0	0.04	0	0	0	0	0	0	0	0	0	0	0	0	0	0	0	0	0	0	0	0	0	0	0.06	0	0.11	0.45	0.07	0.12	0.04	0.13	0	0	0	0	0	0	0	0	0
XLOC_001439	0.29	0.29	0	0.15	0.1	0	0	0.14	0.11	0.07	0.02	0.1	0.28	0.15	0.09	0.11	0.05	0	0.2	0.06	0.03	0.04	0	0.06	0.02	0	0.04	0.05	0	0.02	0.05	0.06	0.02	0.1	0.06	0.03	0.06	0.03	0.08	0	0.2	0	0.05	0.18	0	0	0.04	0	0.07
XLOC_001442	0.69	0.62	0.53	0.82	0.26	0.3	0.21	0.75	0.81	1.09	1.16	1.02	1.58	0.89	1.36	0.89	0.69	0.86	1.01	1.23	1.04	0.61	0.98	0.49	0.93	0.76	0.88	0.9	0.86	0.57	0.54	0.35	0.33	0.31	1.29	1.05	1.09	1.59	0.98	1.56	1.23	0.55	0.82	0.79	1.34	0.99	1.07	0.73	0.61
XLOC_001445	0	0.04	0.19	0.31	0.32	0.17	0	0.75	0	0.1	0.07	0.03	0.04	0.11	0	0	0	0	0.07	0	0	0.08	0	0	0	0	0	0	0.08	0.16	0	0.08	0	0	0.55	0	0.11	0.74	0.38	0.37	0.18	0	0.11	0.2	0.04	0	0.75	0	0
XLOC_001452	3.48	4.71	2.84	3.17	4.78	1.17	0.64	2.56	2.43	2.35	2.19	1.69	2.89	2.33	2.12	2.32	1.99	2.38	1.31	1.34	2.7	1.09	0.96	1.76	1.93	2.66	1.44	1.04	1.91	1.09	0.54	1.63	2.38	4.09	4.75	4.2	4.81	1.93	2.03	2.1	1.94	3.07	1.96	2	2.74	1.45	1.4	1.53	2
XLOC_001453	0.09	0.28	0.33	0.42	0.12	0.52	0.33	0.3	2.36	3.46	0.94	5.02	1.33	5.74	2.65	3.33	0.73	0.22	0.16	0.6	0.26	0.84	0.8	1.05	0.2	0.37	0.35	0.78	0.25	0.7	0.31	0.39	0.28	0.75	0.43	3.1	0.37	1.78	1.52	1.46	0.08	0.12	0.15	0.4	0.05	0.61	0.49	0.31	0.14
XLOC_001455	0.07	0.22	0.75	0.29	0.18	0.22	0.09	0.21	0.14	0.24	0.28	0.1	0.51	0.35	0.46	0.4	0.33	0.23	0.09	0.09	0.17	0.23	0.06	0.1	0.22	0.24	0.38	0.18	0.1	0.31	0.17	0.07	0.22	0.29	0.24	0.23	0.26	0.31	0.27	0.05	0.19	0.43	0.26	0.14	0.36	0.56	0.28	0.22	0.21
XLOC_001467	0.08	0.06	0.24	0.04	0.06	0.3	0.48	0.63	1.5	2.05	4.34	1.53	3.54	2.77	3.21	4.28	0.41	0.19	0.49	0.15	0.35	0.62	0.57	0.55	0.29	0.17	0.42	0.06	0.39	0.67	0.74	0.55	0.59	0.59	2.24	0.49	1.95	0.93	2.98	2.97	0.09	0.22	0.24	0.05	0.04	0.24	0.18	0.43	0.24
XLOC_001468	0	0.06	0.02	0.02	0.16	0	0.04	0.04	0.39	0.04	0.13	0.19	0.45	0.33	0.43	0.3	0.04	0.15	0.17	0.06	0.23	0.18	0.1	0.13	0.27	0.06	0.09	0.18	0.16	0.15	0	0.09	0.08	0.15	0.22	0.04	0.05	0.06	0.24	0.19	0.1	0.03	0.12	0.01	0.11	0	0.14	0.01	0.14
XLOC_001469	0.03	0.12	0.14	0.06	0.02	0	0.12	0.29	0.31	0.27	0.2	0.28	0.35	0.52	0.33	0.53	0.36	0.2	0.1	0.09	0.43	0.23	0.39	0.65	0.16	0.3	0.18	0.17	0.34	0.33	0.22	0.48	0.03	0.26	0.1	0.23	0.07	0.59	0.24	0.07	0.13	0.34	0.64	0.27	0.12	0.33	0.3	0.4	0.13
XLOC_001475	0.36	0.5	0.15	0.3	0.04	0.08	0.19	0.18	0.21	0.2	0.07	0.33	0.4	0.51	0.24	0.2	0.3	0.09	0.05	0.2	0.16	0.08	0.07	0.02	0.29	0.1	0.13	0.21	0.03	0.01	0	0.06	0.16	0.27	0.11	0.11	0.02	0.21	0.29	0.05	0.14	0.25	0.01	0.05	0.13	0.05	0.03	0.08	0.15
XLOC_001488	0.13	0	0.29	0.11	0	0	0	0.24	0	0.07	0.21	0.42	0.07	0.08	0.07	0	0	0.1	0	0	0	0	0	0.11	0.52	0	0.22	0.31	0	0.04	0	0	0	0.44	0.12	0.07	0	0	0	0	0.07	0.11	0.15	0.2	0.28	0	0.05	0.14	0
XLOC_001490	0.6	0.35	0.42	0.59	0.34	0.57	0.46	0.28	0.45	0.4	0.46	0.28	0.33	0.19	0.11	0.26	5.52	5.33	6.32	6.02	4.58	5.15	3.62	5.41	3.48	5.28	4.17	4.23	2.09	2.26	2.46	2.66	2.46	1.92	0.86	0.47	0.21	0.44	0.33	0.07	6.93	8.31	5.3	4.83	4.33	5.54	4.47	6.4	5.78
XLOC_001491	0.83	0.8	0.41	0.6	0.16	0.8	0.76	0.61	0.37	0.27	0.25	0.46	0.12	0.17	0.38	0.21	0.41	0.23	0.02	0.29	0.19	0.25	0.2	0.36	0.57	0.34	0.22	0.1	0.13	0.14	0.01	0.25	0.08	0.55	0.15	0.83	0.26	0.81	0.21	0.36	0.52	0.67	0.3	0.35	0.25	0.26	0.49	0.3	0.1
XLOC_001501	0	0	0	0	0	0	0	0	0.09	0	0.1	0	0.05	0	0	0.03	0.35	1.02	0.35	0.48	0.27	0.36	0.27	0.04	0.8	0.16	0.08	0	0.28	0.03	0	0	0.53	0.22	0.05	0.05	0.08	0.35	0.57	0.11	0.27	0.51	0.05	0.05	0.23	0	0.27	0.03	1
XLOC_001507	1.13	1.07	0.12	0.3	0.07	0	0.13	0.12	2.27	1.95	1.89	2.28	5.15	7.42	2.01	1.9	3.4	1.56	0.59	0.87	1.15	0.67	0.44	0.53	1.63	1.54	0.98	0.75	0.47	0.33	0.17	0.34	2.08	2.72	2.95	4.56	2.33	2.66	3.97	1.39	2.42	1.75	0.35	0.95	0.67	0.83	0.65	0.33	1.55
XLOC_001509	0	0.05	0.06	0.15	0.27	0.2	0.07	0	0.02	0.31	0.87	0.6	0.55	0.31	0.22	0.45	0.2	0.09	0.2	0.23	0.04	0	0	0.13	0.04	1.07	0.79	0.22	0	0.05	0	0.17	0.06	0.72	0.37	0.04	0	0.53	0	0.31	0	0.38	0.24	0.14	0	0.12	0.03	0	0
XLOC_001512	0.28	0.57	0.57	0.31	0.44	0.39	0.1	0.94	0.2	0.35	0.35	0.09	0.42	0.63	0.47	0.32	0.32	0.3	0.23	0.33	0.15	0.48	0.27	0.29	0.35	0.37	0.25	0.23	0	0.17	0.12	0.38	0.32	0.25	0.37	0.44	0.05	1.16	0.52	0.19	0.28	0.34	0.35	0.59	0.7	0.44	0.65	0.49	0.13
XLOC_001515	0.38	0.87	0.38	0.38	0.33	0.12	0.39	0.51	0.75	0.35	0.2	0.1	0.75	0.35	0.18	0.47	0.92	0.15	0.19	0.28	0.99	0.46	0.19	0.2	0.43	0.68	0.45	0.47	0.3	0.71	0.03	0.12	0.48	0.99	0.53	0	0.12	0.3	0.5	0.21	1.02	0.89	0.16	0.72	0.34	0.34	0.26	0.58	0.54
XLOC_001517	0.57	0.13	0	0.8	0.5	0	0.41	2.25	1.12	0.03	0.33	0.44	0.75	0.32	0.77	2.06	0.23	1.08	0.06	0.49	0.4	0	0.3	0.82	0.5	0.07	0	0.26	0.4	0.08	0.55	1.17	0.41	0.09	0.36	0.56	1.09	0	0.37	4.73	0.38	0	0.18	0.13	0.45	0.08	0.99	1.89	0.86
XLOC_001521	1.4	0.62	1.15	1.17	1.12	1.63	1.26	0.96	0.29	0.14	0.09	0.3	0.29	0.37	0.43	0.13	0.08	0.04	0	0.17	0.18	0.21	0.25	0.29	0.08	0.14	0.19	0.12	0.07	0.07	0.05	0.09	0.06	0.34	0	0.03	0.1	0	0.4	0.19	0.33	0.23	0.19	0.1	0.24	0.28	0.19	0.31	0.13
XLOC_001524	0.41	0.59	0.03	0.39	0.48	0.65	0.41	0.9	0.07	0.24	0	0	0.12	0.15	0.06	0.11	0.13	0.09	0.15	0.07	0.07	0.23	0.24	0.19	0.08	0.08	0.06	0.16	0.33	0.36	0.08	0.16	0.19	0.33	0	0.18	0.36	0.39	0.39	0.17	0.25	0.8	0	0.17	0.45	0.61	0.56	0.31	0
XLOC_001540	0	0	0	0	0	0	0	0.06	0	0.05	0.32	0	0.11	0.06	0.02	0.08	0.44	0.67	0.45	0.4	0.37	0.04	0.36	0.44	0.52	0.23	0.04	0	0.26	0	0.06	0	0.05	0.41	0.39	0.17	0.39	0.43	0.08	0.9	0	0.08	0.04	0	0	0	0	0.02	0.31
XLOC_001542	0.81	0.73	0.62	0.21	0.09	0.31	0.41	0.28	0.21	0.09	0.21	0.26	0.24	0.36	0.17	0.23	0.03	0.03	0.18	0.31	0.49	0.05	0.22	0.19	0.3	0.35	0.13	0.14	0	0.19	0.24	0.25	0.03	0.43	0.21	0	0.08	0.28	0.37	0.31	0.5	0.2	0.23	1.09	0.03	0	0.12	0.24	0.46
XLOC_001546	0.33	0.4	1.03	1.58	1.64	1.31	1.07	0.9	0.21	0.49	0.62	0.58	0.97	0.98	1.24	0.36	0.92	0.6	0.78	0.55	0.49	0.8	0.47	0.89	0.55	0.9	0.97	0.88	0.61	0.77	0.13	0.77	0.67	1.41	0.7	1.14	0.41	0.43	1.35	0.5	0.43	1.29	1.17	0.81	0.71	1.19	0.99	1.42	0.81
XLOC_001548	0.08	0.13	0.01	0.36	0.27	0.29	0.13	0.2	0	0	0	0	0	0	0	0	0	0	0	0	0	0	0	0	0	0	0	0.01	0	0	0	0	0	0	0	0.02	0	0	0	0	0	0.15	0	0	0	0	0	0	0.02
XLOC_001550	0.75	0.95	0.5	0.69	1.03	1.21	1.06	1.07	0.1	0.31	0.14	0.16	0.35	0.49	0.11	0.25	0.14	0.14	0.14	0.17	0.07	0.24	0.07	0.28	0.13	0.19	0.18	0.09	0.23	0.55	0.32	0.14	0.19	0.2	0.2	0.19	0.18	0.22	0.19	0.56	0.21	0.23	0.05	0.09	0.32	0.33	0.24	0.39	0.12
XLOC_001551	0	0.06	0	0	0	0.68	0.13	0.07	0	0	0	0	0	0	0	0	0	0	0	0	0	0	0	0	0	0	0	0	0	0	0	0	0	0	0	0	0	0	0	0	0	0	0.05	0	0	0	0	0	0
XLOC_001555	0	0	0	0	1.28	0	0.47	0	0	0	0.04	0.08	0.59	0	0.48	0.04	0.05	0	0	0	1.18	0	0.58	0.25	0	0	0	0.04	1.04	0	0.86	0	0	0	0	0	0.69	0	0.42	0	0	0.04	0	0.07	1.38	0	0.25	0	0
XLOC_001556	0.05	0.22	0.33	0.15	0.5	0.04	0.34	0.41	0.24	0.22	0.17	0.12	0.08	0.13	0	0.19	0.2	0.07	0	0.18	0.13	0.06	0.15	0.56	0.16	0.23	0.1	0.34	0.14	0.11	0.25	0.11	0.03	0.31	0.17	0.18	0.32	0.34	0.32	0.1	0.05	0.2	0.44	0.09	0.03	0	0.19	0.19	0
XLOC_001559	0.11	0.08	0	0.14	0.11	0	0	0.31	0.44	0.21	0.18	0.3	0	0.03	0.16	0.2	0	0.44	0.12	0.22	0.26	0	0.09	0.15	0.35	0.06	0.36	0.99	0.25	0	0.43	0.07	0.37	0	0.27	0.17	0.25	0.18	0.4	0.19	0.54	0.25	0.16	0.52	0	0.69	0.31	0.16	0.06
XLOC_001561	0.72	0.56	0.46	0.54	0.26	0.62	0.76	0.77	0.11	0.02	0.08	0.1	0.14	0.13	0.4	0.2	0.16	0.15	0	0.15	0.1	0.23	0.3	0.19	0.11	0	0.49	0.08	0.63	0.18	0	0.21	0	0.06	0.18	0.26	0.03	0.12	0.31	0.09	0.31	0.1	0.38	0.15	0.09	0.2	0.2	0.15	0.04
XLOC_001562	0	0	0	0	0	0	0	0	0.06	0.12	0.25	0	0	0.02	0.09	0	0.46	0.6	0.07	0.22	0.09	0.04	0.13	0	0.65	0.14	0	0.24	0.18	0.02	0	0.08	0.52	0.19	0.33	0.22	0.42	0.17	0.34	0.66	0	0	0.04	0.02	0	0	0	0	0.15
XLOC_001564	1.17	0.58	0	0.81	1.31	0.71	0	0.21	2.33	0.72	0	0.56	1.06	0.81	0.02	0.42	0.51	1.77	0	0.57	1.74	1.58	0	0.88	1.25	0.87	0.13	0.53	2.46	1.11	0.06	1.14	1.34	1.24	0	1.04	1.74	0.6	0	1.97	1.55	0.79	0	0.52	1.5	0.6	0	1.05	0.97
XLOC_001565	0.1	0	0	0.04	0	0.09	0	0	0.24	0.29	0.03	0.05	0.11	0.45	0.17	0.06	0	0	0.1	0.05	0.18	0.73	0.28	0.13	0	0.14	0.14	0.08	0.03	0.39	0.3	0.09	0.07	0.07	0	0.05	0.09	0.68	0.17	0.11	0	0	0	0	0.21	0.33	0.07	0.17	0.23
XLOC_001569	0.19	0.21	0.14	0.3	0.31	0.27	0.58	0.22	0.18	0.07	0.36	0.03	0.14	0.36	0.24	0.18	0.09	0.24	0.13	0.12	0	0.31	0.55	0.05	0.25	0.07	0	0	0.08	0.41	0.2	0	0.32	0	0	0.06	0	0.52	0.44	0.07	0.03	0	0.25	0.35	0.22	0.11	0.26	0.09	0.21
XLOC_001571	0.15	0.14	0.29	0.12	0	0	0	0.13	0.03	0.32	0	0.05	0	0.06	0.08	0.23	0.11	0	0.15	0.15	0.05	0.12	0.04	0.17	0.14	0.17	0.14	0.18	0	0.15	0	0.22	0.11	0.11	0.33	0.1	0.09	0.16	0.12	0.17	0.17	0.14	0.11	0.08	0.18	0.4	0.24	0	0.06
XLOC_001578	0.27	0.47	0.54	0.34	0.58	0.42	0.34	1.04	0.22	0.56	0.42	0.31	0.58	0.39	0.86	0.5	0.34	0.12	0.22	0.36	0.48	0.2	0.55	0.46	0.06	0.68	0.78	0.64	0.1	0.42	0.17	0.2	0.31	0.32	0.8	0.47	0.05	0	0.5	0.18	0.06	0.41	0.66	0.4	0.48	0.87	1.27	0.73	0.3
XLOC_001580	0.32	0.59	0.25	0.46	0.6	0.66	0.75	0.44	0.22	0.12	0.15	0.46	0.28	0.3	0.63	0.35	0.44	0.09	0.38	0.23	0.16	0.18	0.23	0.95	0.21	0.05	0.33	0.27	0.09	0.09	0.6	0.11	0.27	0.48	0.19	0.26	0	0.21	0.37	0.23	0.14	0.45	0.08	0.04	0.66	0.44	0.36	0.26	0.13
XLOC_001581	0.02	0	0	0.02	0	0.06	0.21	0	0.04	0.18	0.15	0.34	0.34	0.68	0.16	0.13	0.37	0.09	0.11	0.09	0.02	0.25	0.18	0.14	0.03	0.11	0.22	0.02	0	0.09	0.11	0.17	0	0.18	0.11	0.31	0.04	0.14	0.24	0.03	0.14	0.05	0.05	0.05	0.11	0.05	0.05	0.23	0.05
XLOC_001592	0.16	0.21	0.36	0.43	0.14	0.15	0.46	0.22	0.2	0.3	0.58	0.37	0.09	0.25	0.4	0.18	0.32	0.16	0.91	0.28	0.24	0.03	0.67	0.42	0.26	0.17	0.88	0.62	0.25	0.25	0.42	0.29	0.05	0.34	0.48	0.4	0.3	0.32	0.62	0.36	0.09	0.07	0.65	0.09	0.18	0.19	0.3	0.16	0.09
XLOC_001593	0.03	0.15	0.02	0.09	0.08	0.04	0.02	0.1	0.34	0.24	0.51	0.67	0.63	0.43	0.46	0.54	0.26	0.03	0.29	0.28	0.17	0.02	0.04	0.14	0.02	0.14	0.35	0.1	0.05	0.1	0.02	0.03	0.12	0.12	0.09	0.26	0.12	0.07	0.27	0.08	0.12	0.16	0.18	0	0.02	0.08	0.09	0.08	0.11
XLOC_001595	0	0	1.99	0	0	0	0	0.03	0	0	0.44	0	0	0	0	0	0	0	0.22	0	0	0	0	0	0	0	0.58	0	0	0	0	0	0	0	0.18	0	0	0	0	0	0	0	0.28	0	0	0	0	0	0
XLOC_001597	0	0.05	0	0.81	0	0.14	0	0	0.05	0.08	0	0	0	0.04	0.04	0.05	0	0	0.4	0	0	0.1	0.19	0	0.04	0.17	0	0.12	0	0.14	0	0	0.06	0.18	0	0.15	0	0.33	0.18	0	0.04	0.09	0.18	0.04	0.05	0.09	0.05	0	0
XLOC_001599	0.33	0.01	0.02	0.1	0.09	0.21	0	0.02	0.31	0.22	0	0.26	0.18	0.07	0.08	0.28	0.11	0.12	0	0.11	0.16	0.29	0.16	0.22	0.34	0.01	0.02	0.12	0.15	0.19	0.12	0.08	0.35	0.06	0.02	0.09	0.15	0.47	0.1	0.07	0.29	0.05	0	0.07	0.21	0.37	0.1	0.06	0.2
XLOC_001603	1.92	1.86	2.09	2.22	2.68	3.64	3.41	5.14	5.43	6.06	3.32	6.61	5.51	8.16	9.42	10.36	1.34	0.96	2.39	1.01	4.8	3.62	5.22	10.36	1.11	1.17	2.65	1.64	4.69	4.59	7.1	5.04	3.06	4.27	6.53	6.19	8.25	9.8	8.11	10.71	1.36	1.5	1.76	1.45	2.84	3.46	2.84	5.27	0.53
XLOC_001608	0	0	0	0	0	0.07	0	0	0	0	0	0.08	0	0	0	0	0	0	0	0	0.07	0.18	0	0	0.08	0	0.04	0	0	0.05	0	0.37	0.05	0.11	0	0	0	0	0	0	0.04	0	0	0.15	0.13	0	0	0	0
XLOC_001612	0.17	1.02	0.76	0.88	0.39	0.71	0.24	0.81	0.18	0.31	0.56	0.11	0.02	0.02	0.06	0.13	0.24	0.33	0.46	0.36	0.15	0.28	0.16	0.27	0.34	0.38	0.22	0.38	0.04	0.03	0	0.07	0.16	0.11	0.05	0.2	0.07	0.27	0.36	0.71	0.47	0.23	0.06	0.09	0.27	0.12	0.02	0.02	0.32
XLOC_001619	0.24	0.53	0.1	0.77	1.38	0.5	0.13	0.3	0.94	0.48	0.25	0.18	1.36	0.58	0.4	0.51	0.28	0.26	0.05	0.38	2.55	0.47	0.46	0.5	0.19	0.43	0.05	0.33	3.12	0.49	0.34	0.57	0.18	0.61	0.18	0.62	1.55	0.75	0.23	0.33	0.32	0.35	0.11	0.2	1.9	0.26	0.56	0.33	0.38
XLOC_001620	0	0.11	0.04	0.09	0	0	0	0	0	0.06	0.06	0.17	0.12	0.34	0.15	0.28	0.04	0.46	0.72	0.21	0.15	0.13	0.3	0.61	0.34	0.3	0.15	0.2	0.2	0.29	0.41	0.6	0.43	0.12	0	0	0.23	0	0	0.12	0.81	0.63	0.06	0.17	0	0.3	0	0.07	0.68
XLOC_001626	0	0	0	0.02	0	0.03	0	0.03	0.13	0.3	0.5	0.31	0.91	0.56	0.29	0.49	0.01	0.01	0.23	0.1	0.17	0.19	0.33	0.5	0.05	0	0.41	0.16	0.28	0.07	0.25	0.44	0.02	0.02	0.21	0.27	0.32	0.19	0.44	0.1	0.24	0	0.41	0.24	0.55	0.2	0.22	0.51	0.05
XLOC_001630	0.13	0	0.09	0.03	0.21	0.33	0.7	0.3	0.15	0.09	0.07	0.38	0.5	0.69	0.79	0.68	0.36	0.06	0.17	0.25	0.27	0.36	0.4	0.14	0.14	0.58	0.24	0.04	0	0.58	0.02	0.08	0.18	0	0.16	0	0.14	0.04	1.22	0.28	0.44	0.65	0.12	0.06	0.12	0.13	0.37	0.23	0.14
XLOC_001634	0.35	0.36	0.04	0	0.12	0	0.32	0.21	0.14	0.06	0.34	0.16	0.22	0.13	0.2	0.34	0	0.05	0.3	0.06	0.16	0.07	0.05	0.1	0.13	0	0.17	0.06	0.11	0	0.25	0.18	0.04	0.22	0.17	0	0.15	0.18	0	0	0	0.06	0.1	0.18	0.17	0	0	0.2	0
XLOC_001636	0.67	0.52	0.33	0.92	0.55	0.2	0.76	0.18	0	0.01	0.03	0	0	0	0.03	0	0.05	0	0.02	0	0.02	0.12	0.04	0.02	0.01	0	0	0	0	0	0.03	0	0.01	0	0.06	0	0	0	0	0	0.01	0.06	0	0	0.02	0.03	0.05	0	0
XLOC_001637	0.38	0.15	0.22	0.62	0.33	0.12	0.38	0.06	0	0	0.03	0	0.01	0	0	0	0.01	0	0	0	0	0	0	0	0	0.07	0.01	0.01	0	0.01	0	0	0	0	0.01	0	0	0	0	0	0.01	0.02	0	0.02	0	0.14	0	0.03	0
XLOC_001640	0.27	0.13	0.33	0.55	0.15	0.3	0.36	0.11	0	0	0.01	0	0.03	0.01	0	0	0.04	0	0.01	0.02	0.02	0	0.03	0	0.01	0.03	0	0	0	0	0	0.01	0.01	0.02	0	0	0	0	0	0	0.04	0.07	0	0	0.06	0.02	0.03	0.03	0
XLOC_001646	0.76	0.68	4.87	5.1	1.25	3.45	4.6	1.74	1.18	0.8	2.62	3.22	1.2	3.3	3.34	1.36	0.88	0.72	2.57	2.46	0.85	1.99	2.01	1.74	1.65	1.55	4.36	2.56	1.17	2.41	1.96	1.45	3.53	1.89	4.18	3.73	0.41	3.19	3.57	1.19	3.36	2.32	7.57	6.3	1.21	4.64	5.24	3.09	1.2
XLOC_001648	0.1	0.17	0.57	0	0.05	0.04	0.32	0	0.72	0.75	0.33	0.29	1.49	0.28	0.22	0.83	0.18	0.15	1.35	0.14	0.31	0	0.08	0.21	0.08	0.32	1	0.51	0.46	0.26	0	0.06	0	0.37	0.78	0.1	0.76	0.05	0.97	1.06	0.52	0.08	1.41	0.05	0.29	0.12	0.54	0	0
XLOC_001650	0.83	0.39	0.72	0.21	0.72	0.82	0.02	0.57	0.77	0.44	0.57	0.38	0.62	0.35	0.09	0.38	0.17	0.38	0.67	0.18	0.67	0.32	0.04	0.26	0.41	0.1	0.65	0.52	0.46	0.2	0.01	0.58	0.46	0.23	0.67	0.19	0.92	0.69	0.3	0.43	0.76	0.21	0.35	0.34	0.48	0.33	0	0.29	0.29
XLOC_001652	0.45	0.5	0.21	0.49	0.16	0.25	0.34	0.25	0	0.15	0.17	0.02	0	0.05	0.29	0	0.09	0.16	0.08	0.08	0.19	0.05	0.1	0.07	0.28	0.09	0.35	0	0	0.05	0	0.05	0.18	0.09	0.15	0.04	0	0.17	0	0.19	0.25	0.2	0	0.06	0	0.3	0	0.03	0.05
XLOC_001660	0	0.1	0.23	0.06	0.28	0.03	0.45	0.19	0.35	0.43	1.05	0.21	0.25	0.32	1.04	0.72	0.05	0.03	0.43	0.28	0.06	0.09	0.11	0.18	0.02	0.1	0.42	0.22	0.57	0.74	1	0.85	1.23	1.47	2.11	1.38	1.19	3.87	1.6	1.55	0.31	0.33	0.44	0.34	0.17	0.38	0.7	0.46	0.2
XLOC_001662	0	0.18	0.03	0	0	0.04	0	0.04	0	0.14	0.07	0.19	0.1	0.6	0.2	0.05	0.06	0.14	0.04	0.3	0	0	0	0.11	0	0.1	0.07	0.32	0	0	0	0	0.16	0.1	0	0.17	0	0	0.1	0.15	0.19	0.14	0	0	0	0	0	0	0.1
XLOC_001663	197.9	388.31	375.17	158.56	1146.01	215.67	357.55	314.55	362.77	710.98	386.94	242.95	1017.74	271.34	294.29	367.11	465.17	265.86	371.32	219	1431.05	373.16	280.7	434.81	525.74	1024.92	556.77	349.09	2347.65	638.28	506.01	747.02	371.88	660.52	605.57	448.7	2292.36	323.65	431.43	1047.58	246.3	504.02	401.62	240.67	1364.81	342.71	207.1	471.27	306.43
XLOC_001668	0.04	0.03	0.17	0.1	0.16	0.66	0.33	0.07	0.14	0.04	0.13	0.02	0.02	0.43	0.09	0.05	0.17	0.09	0.04	0	0	0.2	0.1	0.07	0.05	0.02	0.27	0	0	0	0.22	0	0.23	0.12	0.49	0.04	0.17	0.29	0.14	0.05	0	0	0.11	0.37	0.12	0.1	0.3	0.16	0
XLOC_001675	0.22	0.3	0.31	0.1	0.3	0.6	0.28	0.27	0.26	0.32	0.25	0.42	0.28	0.07	0.29	0.13	0.28	0.3	0.71	0.68	0.24	0.69	0.35	0.3	0.27	0.17	0.47	0.57	0.49	0.26	0.23	0.43	0.06	0.16	0.37	0	0.11	0	0.15	0.1	0.12	0.36	1.32	0.66	0.28	0.05	0.68	0.65	0.3
XLOC_001678	0.07	0.32	0	0.37	0	0	0	0.12	0.16	0.53	0	0.14	0	0.04	0.15	0.04	0.24	0.05	0.21	0.2	0	0	0.16	0	0.08	0.04	0.04	0.28	0	0.16	0	0.17	0.25	0.25	0	0.26	0	0.07	0.16	0	0	0.22	0.34	0.31	0	0.04	0.09	0	0
XLOC_001681	0.03	0	0.01	0.07	0	0.01	0.08	0	0.07	0.36	0.4	0.47	0.58	0.62	0.23	0.24	0.15	0.01	0.18	0.42	0.27	0.26	0.21	0.22	0.01	0.35	0.21	0.38	0.11	0.1	0.15	0.02	0.08	0.1	0.15	0.34	0.17	0.14	0.3	0.07	0	0.08	0.3	0.27	0.02	0.11	0.15	0.02	0.02
XLOC_001682	1.14	1.48	2.81	3.87	3.44	0.98	0.44	1.43	0.8	1.05	0.49	2.54	3.7	1.3	0.33	1.26	1.56	0.82	0.31	1.9	1.18	0.64	0.13	0.54	0.7	0.62	1.11	1.61	1.2	0.44	0.13	0.75	0.92	1.46	0.6	2.46	1.08	1.12	0.6	0.8	0.66	1.22	0.36	1.4	1.75	0.56	0.06	0.54	0.86
XLOC_001683	0.35	0.52	1.53	2.33	1.41	0.41	0.13	0.59	0.2	0.21	0.16	0.92	1.03	0.34	0.14	0.29	0.35	0.38	0.15	0.57	0.22	0.1	0.04	0.2	0.39	0.31	0.36	0.52	0.54	0.11	0.01	0.26	0.3	0.44	0.09	1.17	0.34	0.42	0.18	0.32	0.09	0.3	0.09	0.61	0.6	0.14	0.03	0.26	0.2
XLOC_001688	0	0	0	0	0	0	0	0	0.12	0.07	0	0.04	0.07	0.27	0.11	0.08	0.19	0.05	0	0.07	0	0.16	0	0.12	0.04	0	0.34	0	0.04	0.89	0	0.04	0.1	0	0.13	0.13	0	0	0	0.31	0.07	0.19	0.19	0.1	0.12	0	0	0	0.08
XLOC_001691	0.28	0.05	0.46	0.13	0	0.1	0	1.13	0.35	0.5	0.21	0.02	0	0.43	0.37	0.44	0.26	0.06	0.36	0.58	0.25	0.92	0.73	0.61	0.07	0	0.34	0.25	0.2	0.83	0.49	1.29	0.72	0.32	0.6	0.23	0	0.49	0.23	1.62	0.37	0.26	1.52	0.82	0.42	1.32	1.19	0.86	0.45
XLOC_001693	0.05	0.05	0.15	0.02	0.05	0.11	0.32	0.15	0.01	0.08	0.64	0.16	0.16	0.2	0.37	0.17	0.12	0.1	0.44	0.22	0.22	0.09	0.79	0.43	0.07	0.03	0.37	0.18	0.1	0.18	0.35	0.1	0.06	0.1	0.26	0.1	0.03	0.08	0.43	0.13	0	0.03	0.45	0.09	0.14	0.12	0.71	0.1	0.1
XLOC_001694	0.57	0.54	0.53	0.4	0.3	0.24	0.24	0.4	0.58	0.71	0.45	0.61	1.2	1.39	1.04	0.62	0.45	0.45	0.31	0.26	0.39	0.46	0.25	0.58	0.6	0.65	0.44	0.26	0.36	0.27	0.09	0.45	0.8	0.87	0.41	0.66	0.41	0.73	0.46	0.26	0.61	1.01	0.49	0.4	0.58	0.57	0.55	0.55	0.51
XLOC_001697	0.1	0.07	0.35	0.21	0.45	0.25	0	0.12	0.21	0.12	0.59	0.14	0.6	0.37	0.07	0.13	0.23	0.23	0.53	0.22	0.24	0.24	0.18	0.17	0.07	0.07	0.53	0.44	0.37	0.27	0.3	0.22	0.09	0.41	0.64	0.25	0.42	0.07	0.15	0.59	0.27	0.09	1.11	0.2	0.19	0.35	0.09	0.2	0.22
XLOC_001698	0.09	1.04	0.87	0.19	0.12	0.13	0.19	0.11	0.04	0.19	0.05	0	0.05	0.02	0.07	0	0.13	0.07	0.09	0.12	0.14	0	0.02	0	0.1	0.26	0.08	0.05	0.43	0	0.13	0.06	0	0.18	0	0.06	0	0.03	0.03	0	0	0.08	0.22	0.05	0.02	0	0.12	0.02	0
XLOC_001700	5.34	4.27	4.97	4.95	4.91	5.36	3.93	5.23	0.02	0.01	0.07	0	0	0	0.02	0.01	0.02	0	0.03	0.04	0.03	0	0.02	0	0	0	0.02	0	0	0.07	0	0	0	0	0	0	0	0	0	0	0	0.01	0	0	0.03	0	0.01	0	0
XLOC_001705	0.05	0.14	0	0.75	0.26	0.5	0.63	0.33	0.12	0.03	0	0.03	0.03	0.3	0.12	0.06	0.19	0.12	0.05	0.21	0.24	0.19	0.21	0.05	0.06	0	0.3	0.25	0.46	0.25	0.09	0.52	0	0.04	0.2	0	0	0.16	0.18	0.24	0	0.23	0.21	0.16	0.06	0.06	0.25	0	0.18
XLOC_001711	0.33	0.86	0	0.12	0.48	0.03	0.16	1.21	0.34	0.86	0.02	0.04	0	0	0.14	0.71	0.27	0.18	0.1	0.06	0.04	0	0.16	0.72	0.42	0.64	0.08	0.13	0.1	0.01	0.02	0.71	0.18	0.64	0	0.02	0.35	0.08	0.02	0.75	0.31	0.73	0	0.16	0.26	0.01	0.15	0.68	0.13
XLOC_001716	0	0	0.1	0.43	0	0	0	0	0	0	0	0.29	0	0	0	0	0	0	0	0	0	0	0	0.06	0	0	0	0	0.04	0	0	0	0	0	0	0.07	0.06	0.07	0	0	0.04	0.04	0	0	0	0.04	0	0	0
XLOC_001723	0	0.41	0	0.07	0	0.07	0.39	0.34	0.1	0.2	0	0.02	0.12	0.15	0.14	0.37	0.21	0.07	0.13	0.13	0.12	0.99	0.82	0.55	0.02	0.64	0.07	0.04	0.08	1.2	0.6	0.42	0.06	0.35	0.08	0	0	1.42	0.3	1.02	0.36	0.12	0.05	0.04	0.28	0.57	0.29	0.58	0
XLOC_001730	0.24	0.08	0.14	0.1	0.24	0.28	0	0.07	0.07	0.06	0.15	0.3	0.17	0.02	0.07	0.16	0.06	0.09	0.04	0.16	0	0.05	0.13	0.07	0.09	0	0.02	0.13	0.3	0.05	0	0	0.03	0.12	0.15	0.16	0.1	0.08	0	0	0.07	0.11	0.05	0.06	0	0.07	0	0.05	0.09
XLOC_001733	0.06	0.04	0.15	0.12	0.09	0.4	0.23	0.11	0.02	0.03	0.05	0.11	0	0	0.02	0.04	0.04	0.05	0	0.06	0.08	0.19	0.37	0.13	0.05	0	0.22	0.06	0.1	0.2	0.1	0.04	0.09	0	0.17	0.03	0.13	0	0.46	0.07	0.34	0.08	0.19	0.65	0.13	0.33	0.29	0.23	0.14
XLOC_001741	0.28	0.35	0.1	0.06	0.08	0.05	0.05	0.04	0.61	0.46	0.46	0.42	0.31	0.32	0.4	0.3	0.5	0.71	0.58	0.74	0.37	0.3	0.11	0.17	1.02	0.9	0.51	0.72	0.63	0.19	0.16	0.41	0.86	0.69	0.43	0.54	0.62	0.06	0.42	0.5	1.09	0.96	0.48	0.56	0.59	0.29	0.61	0.22	0.9
XLOC_001742	0	0.23	0.09	0.1	0	0.07	0.04	0.19	0	0.16	0.04	0.11	0	0.05	0.14	0.17	0.12	0.07	0.09	0.04	0.11	0.26	0.17	0.11	0.12	0.07	0.07	0.04	0.26	0	0	0.03	0.18	0	0.12	0	0	0.17	0.1	0.1	0.07	0.23	0	0.02	0.3	0.1	0.14	0.06	0.14
XLOC_001746	0.04	0.18	0.03	0.21	0.27	0.37	0.18	0.24	0.02	0.14	0.16	0.1	0.17	0.22	0.04	0.09	0.28	0.15	0.12	0.08	0.11	0	0.12	0.5	0.02	0.04	0.15	0	0.31	0.07	0.1	0	0.14	0.4	0	0.04	0.2	0.08	0.45	0.13	0.06	0.25	0.11	0.04	0.05	0.02	0.26	0	0.13
XLOC_001747	0.16	0.22	0.23	0.32	0	0.14	0.15	0.07	0	0.09	0.04	0.04	0.26	0	0.18	0	0	0	0.49	0	0	0.2	0	0	0.05	0	0.14	0.13	1.01	0.05	0	0	0.06	0	0.08	0	0.14	0	0	0.46	0.22	0	0	0.08	0.05	0.15	0	0.06	0.18
XLOC_001751	6.12	11.89	8.31	4.91	4.08	13.64	4.9	7.78	0.06	0.09	0.09	0.04	0	0.08	0.03	0.03	0.05	0.01	0	0	0	0.01	0.01	0.05	0	0.02	0.04	0.01	0.04	0.06	0.01	0	0.01	0.02	0.12	0.09	0.06	0.2	0.05	0.03	0.01	0	0.03	0.01	0	0.01	0.02	0.08	0.01
XLOC_001753	0	0.03	0.07	0.04	0	0	0.01	0.04	0.36	1.31	0.54	1.59	0.94	1.51	1.66	8.15	1.65	0.26	0.31	0.16	0.03	0.09	0.11	1.1	0.18	0.76	0.75	0.3	0.07	0.1	0.08	0.83	0.2	0.89	0.38	0.59	0.13	0.2	0.68	1.52	0.1	0.49	0.49	0.12	0.1	0.22	0.09	1.01	0.14
XLOC_001756	0.02	0.13	0.07	0.03	0	0	0	0.09	0.01	0.07	0.02	0.08	2.2	0.03	0.04	0.02	0.05	0	0.03	0.03	0.02	0.02	0	0.03	0.05	0.06	0.01	0.1	0	0	0.03	0	0	0	0.1	0	0.03	0.09	0.08	0.04	0	0	0.02	0.03	0.05	0.03	0.05	0.02	0.02
XLOC_001757	0.03	0.06	0.02	0	0	0	0	0	0	0	0.02	0	1.84	0	0	0	0	0.02	0	0	0	0.04	0	0.08	0	0.08	0	0.05	0	0	0	0	0	0	0.06	0.03	0.18	0	0	0	0	0.02	0	0	0	0	0	0	0
XLOC_001760	1.29	0.26	1.5	2.43	2.61	1.82	0.7	1.85	0	0	0.39	0.09	0.28	0.18	0.02	0.12	0.11	0.12	0.1	0.16	0.64	0.17	0.21	0.15	0	0	0.45	0.29	0.18	0.13	0	0.09	0	0	0.13	0.08	0.28	0.12	0	0.02	0.02	0	0.06	0.18	0.19	0.38	0.1	0.1	0.07
XLOC_001761	0.57	1.3	0.26	0.31	0.53	0.54	0.14	0.03	0.67	1.7	0.64	1.2	0.73	1.71	0.76	0.57	1.71	0.74	0.76	0.67	0.62	0.25	0.31	0.38	0.91	1.15	0.81	0.78	0.54	0.5	0.29	0.42	2.19	2.44	0.76	0.85	0.72	0.84	0.14	0.07	0.38	1.28	0.23	0.89	0.41	0.4	0.41	0.3	0.71
XLOC_001766	0.41	0.53	0.26	0.33	0.14	0.08	0.04	0.24	0.16	0.22	0.26	0.27	0.47	0.1	0.25	0.11	0.23	0.18	0.19	0.22	0.29	0.11	0.15	0.12	0.15	0.15	0.21	0.17	0.4	0.11	0.17	0	0.07	0.07	0.17	0	0.24	0	0.16	0.31	0.18	0.15	0	0.14	0.22	0.06	0.06	0	0.1
XLOC_001768	0.75	0.47	0.71	0.49	0.18	0.58	0.24	0.53	1.29	0.95	3.29	0.93	0.21	0.57	0.54	0.46	0.24	1.16	1.36	0.73	0.91	0.76	1.85	0.89	1.48	0.3	0.54	0.36	0.71	0.48	0.63	0.3	1.12	0.77	2.86	1.98	1	2.63	1.71	1.67	0.84	0.26	0.19	0.1	0.25	0.08	0.32	0.37	0.99
XLOC_001769	0	0	0	0	0.07	0.32	0.12	0	0	0	0	0	0	0.04	0.04	0.12	0.02	0.03	0	0	0.06	0.12	0	0	0	0	0	0.05	0.17	0.12	0	0	0.1	0	0	0	0	0.1	0.04	0	0	0.04	0	0.1	0	0.24	0.02	0	0
XLOC_001771	0	0	0	0	0	0.1	0.05	0.12	0.23	0.33	0.09	0.1	0.03	0.05	0.86	0.46	0.03	0	0.06	0	0	0.04	0	0.05	0	0.06	0.01	0.08	0.07	0.09	0.08	0.2	0.27	0.3	0.58	0.33	0.23	1.16	0.6	1.02	0	0.03	0.05	0	0.02	0.02	0.1	0.31	0.03
XLOC_001779	0.16	1.15	1.11	1.6	0.88	1.47	1.12	2.37	0.19	0.09	0	0	0	0.09	0.04	0.09	0.35	0.06	0	0	0.37	0.49	0.06	0	0.14	0.27	0.36	0.3	0.05	0.1	0.09	0.55	0.06	0.06	0	0.4	0.28	0	0	0	0.09	0.18	0.09	0	0.05	0.44	0.17	0.44	0.09
XLOC_001785	0	0	0	0	0	0	0	0	0.23	0	0	0	0.07	0	0.04	0	0	0	0	0	0	0	0	0	0	0	0	0	0	0	0	0	0	0	0	0	0	0	0	0	0	0	0.54	0	0	0	0.09	0	0
XLOC_001786	0.11	0.25	0.29	0	0.28	0.05	0.24	0.03	0.03	0	0	0	0	0.06	0.08	0	0.22	0.15	0.37	0.61	0.52	0.52	0.48	0.54	0.05	0	0.26	0.47	0.18	0.27	0	0	0	0.04	0	0	0	0.03	0	0	0.14	0	0.21	0.23	0.1	0.07	0.06	0.19	0
XLOC_001790	0.05	0.11	0	0.17	0	0	0.15	0.09	0.44	0.36	0.99	0.84	0.89	0.66	0.38	0.86	0	0.12	0	0.1	0.19	0.06	0.08	0.27	0	0.49	0.21	0	0	0.38	0	0.1	0.15	0.12	1.64	0.83	0.18	0.22	0.68	0.72	0.29	0.03	0.12	0.27	0	0.03	0	0.07	0
XLOC_001791	0.11	0.15	0.09	0.15	0.11	0.18	0.03	0.18	0.84	0.24	0.25	0.04	0.04	0.11	0.27	0.21	0.2	0.13	0.31	0.04	0.19	0	0.04	0.08	0.2	0.08	0.12	0.1	0	0	0	0.07	0.08	0.24	0.19	0.41	0.37	0.19	0.15	0.21	0.17	0.29	0.14	0.03	0	0.01	0	0.09	0.11
XLOC_001804	0.22	0.85	1.23	1.7	0.29	0.26	0.34	0.33	0.17	0.31	0.42	0.86	0.16	0.17	0.16	0.21	0.11	0	0.75	0.72	0.27	0.09	0.35	0	0	0.24	0.54	0.23	0.05	0	0	0.18	0	0.38	0.07	0.15	0.13	0.15	0.09	0	0.2	0.16	0.83	0.34	0.09	0.49	0.2	0.15	0.08
XLOC_001806	2.08	1.13	1.51	1.89	0.55	1.91	0.6	1.05	0.31	0.49	0.22	0.34	0.12	0.47	0.15	0.17	0.25	0.19	0.16	0.04	0.46	0.65	0.21	0.4	0.08	0.2	0.16	0.14	0.14	0.32	0.11	0.32	0.29	0.5	0.23	0.5	0.33	0.72	0.28	0.13	0.15	0.27	0.2	0.14	0.19	0.55	0.08	0.61	0.18
XLOC_001810	0	0	0.02	0.03	0	0	0.06	0.03	0.68	0.78	0.59	0.45	1.08	0.63	0.26	0.61	0	0.03	0.03	0.06	0.03	0.16	0.16	0.13	0.02	0.04	0	0.01	0.05	0.41	0.25	0.24	0.14	0.11	0.5	0.5	1.37	0.87	0.38	0.93	0	0	0.07	0.09	0.02	0.08	0.19	0.04	0
XLOC_001820	0.44	1.02	1.65	2.05	1.74	2.64	1.48	1.55	0.39	0.69	0.66	1.1	1.7	1.99	2.29	1.37	0.93	0.33	0.62	0.97	0.81	0.92	0.67	0.88	0.25	0.81	0.81	0.83	0.37	1.02	0.61	0.91	0.71	1.26	0.66	0.94	0.57	1.26	1.1	0.92	0.65	1.33	1.03	1.64	1.27	1.75	1.49	1.34	0.48
XLOC_001823	0.06	0.17	0.09	0.05	0.13	0	0.41	0.34	0.75	0.33	0.33	0.3	0.34	0.9	0.71	0.85	0.27	0.39	0.64	0.31	0.58	0.39	1.17	0.55	0.32	0.07	0.36	0.63	0.48	0.34	0.27	0.59	0.55	0.19	0.95	0.87	0.66	0.99	1.4	1.01	0.42	0.35	0.39	0.51	0.11	0.88	0.13	1.17	0.43
XLOC_001828	0.37	0.28	0.35	0.09	0.11	0.1	0.17	0.45	0.04	0	0.15	0.11	0.06	0.05	0.18	0.14	0	0.09	0.24	0.25	0.11	0.06	0.02	0.22	0.08	0	0.18	0.13	0.12	0.08	0.33	0.01	0.05	0.07	0.11	0.32	0	0.05	0.11	0.37	0	0	0	0.02	0.26	0	0.14	0.14	0.08
XLOC_001830	0.16	0.36	0.17	0.44	0.32	0.28	0.19	0.31	0.57	0.47	0.49	0.52	0.46	0.42	0.99	0.31	0.11	0.18	0	0.09	0.25	0.31	0.22	0.31	0.09	0.05	0.25	0.07	0.47	0.38	0.51	0.2	0.92	1.17	1.61	2.25	1.52	0.88	1.47	1.12	0.16	0.06	0.36	0.37	0.19	0.15	0.45	0.16	0.1
XLOC_001836	0	0.6	0	0	0.13	0	0.35	0.17	0	0.03	0	0	0	0.14	0.11	0	0.18	0	0	0.06	0	0	0.1	0	0	0.14	0	0	0	0.11	0	0	0.05	0	0	0	0	0	0	0	0	0.07	0	0	0	0	0	0.17	0
XLOC_001838	0.04	0.28	0.56	0.32	0.29	0.61	0.75	0.52	0	0	0.06	0.08	0.2	0.08	0.12	0.04	0.08	0.03	0	0	0.03	0	0.06	0.06	0	0.02	0.06	0.04	0	0.27	0	0.02	0.08	0.05	0.03	0	0	0.65	0.13	0.25	0	0.43	0.17	0.13	0.04	0.18	0.03	0.23	0
XLOC_001839	1.98	1.66	1.77	1.96	2.7	2.22	2.57	1.84	0.58	0.37	0.95	0.43	0.49	0.3	0.24	0.29	1.26	1.13	2.02	0.64	0.91	0.93	0.91	0.97	1.95	2.68	1.65	0.98	0.8	0.66	0.46	0.78	5.05	3.74	0.61	1.31	0.72	0.62	0.66	0.38	3.92	4.09	2.97	1.93	1.45	1.55	1.36	1.31	2.18
XLOC_001840	0	0.13	0.05	0.16	0	0.46	0	0	0.31	0.62	0.65	0.03	0.29	0.75	0.51	0.46	0.38	0.25	0.27	0.13	0.3	0.24	0.21	0.34	0.41	0.22	0.37	0.45	0.33	0.39	0.92	0.08	0.86	0.49	0.25	0.19	0.11	0.21	0.31	0	0.76	0.29	0.59	0.5	0.08	0.48	1.03	0.13	0.15
XLOC_001852	0	0	0	0	0	0	0	0	0.22	0.2	0.15	0.2	0.11	0	0.14	0.12	0	0.13	0.08	0.08	0.04	0.05	0.6	0.18	0.05	0	0	0	0	0	0.16	0	0	0.06	0.08	0	0.07	0	0	0	0.05	0.11	0.07	0.11	0	0	0.06	0.08	0.09
XLOC_001854	0.67	0.42	0.6	1.02	1.53	0.58	0.64	0.42	0.24	0.13	0.17	0.38	0.65	0.25	0.22	0.22	0.22	0.43	0.47	0.26	0.55	0.31	0.34	0.14	0.36	0.24	0.28	0.49	0.76	0.29	0.31	0.14	0.08	0.14	0.34	0.19	0.82	0.18	0.26	0.05	0.19	0.25	0.11	0.19	0.61	0.32	0.24	0.09	0.29
XLOC_001856	0.5	0.66	0.8	1.02	0.67	0.96	1.62	1.11	0.17	0.11	0.15	0.27	0.12	0.08	0.06	0.1	0.1	0.14	0.4	0.21	0.23	0.13	0.26	0.12	0.28	0.3	0.2	0.06	0.13	0.09	0.12	0.35	0.34	0.11	0.1	0.25	0	0	0.04	0	0.08	0.18	0.36	0.24	0.43	0.11	0.29	0.49	0.04
XLOC_001859	1.05	1.69	1.2	1.93	1.31	1.77	2.14	2.75	0.65	0.26	0.32	0.18	0.36	0.47	0.06	0.29	0.08	0.43	0.45	0.32	0.15	0.4	0.26	0.43	0.62	0.52	0.44	0.14	0	0.1	0.15	0.2	0.6	0.49	0.42	0.27	0.14	0	0.39	0.25	0.21	0.33	0.65	0.34	0.72	0.67	0.15	0.11	0
XLOC_001860	0.07	0.14	0.15	0.44	0	0.71	0.32	0	0.44	2.86	1.86	3.2	3.65	4.2	2.44	1.43	0.93	0.37	0.56	1.94	1.62	1.17	0.88	0.82	0.58	1.7	1.35	1.79	1.63	1.85	0.63	1.06	0.5	0.92	0.84	1.62	0.41	3.13	2.95	0.93	0.49	0	0.66	1.84	0.82	0.58	0.33	0.19	0.08
XLOC_001863	0.4	0.11	0.28	0.09	0.06	0.63	0.52	0.7	0.17	0.42	0.26	0.39	0.24	0.26	0.12	0.2	0.4	0.17	0.23	0.05	0.15	0.07	0.09	0	0.13	0.03	0	0	0.32	0.44	0.15	0	0.57	0.29	0.11	0.11	0.49	0	0.59	0	0.12	0.59	0.03	0.23	0.13	0.1	0.08	0.08	0.19
XLOC_001866	0.67	0.79	0.42	0.32	0.57	0.54	0.74	0.52	0.37	0.31	0.68	0.19	0.12	0.13	0.05	0.26	0.42	0.21	0.09	0.35	0.16	0.27	0.25	0.08	0.15	0.37	0.33	0.26	0.22	0.48	0	0.17	0.36	0.1	0.34	0.62	0.27	0.65	0.1	0.36	0.27	0.34	0.25	0.45	0.48	0.11	0.49	0.46	0.51
XLOC_001868	0.1	0.28	0.08	0.12	0.1	0.09	0.1	0	19.42	15.29	10.43	21.14	26.02	18.56	20.54	19.67	0.41	0.2	1.58	0.81	1.75	1.2	2.07	2.23	0.35	0.57	2.23	1.95	2.93	1	2.85	2.69	0.91	1.47	4.68	6.58	11.53	3.18	10.45	7.53	0.23	0.03	0.06	0.16	0.25	0.31	0.5	0.67	0.29
XLOC_001869	0	0.28	0	0	0	0.09	0	0	0.15	0.13	0.03	0.03	0.16	0.06	0.03	0	0.25	0.04	0.1	0.05	0	0	0.12	0.13	0.09	0.5	0.09	0	0.25	0.03	0.14	0.03	0.07	0.23	0.1	0	0.09	0	0.06	0	0.03	0.19	0	0	0.15	0	0.14	0.14	0.23
XLOC_001873	0.26	0.45	0.16	0.52	0.22	0.45	0.17	0.62	0.04	0	0.33	0.08	0.34	0.15	0.16	0.11	0.03	0.26	0.11	0.25	0.03	0.09	0.09	0.03	0.04	0.02	0.23	0	0	0.02	0.28	0	0.16	0.35	0.21	0.18	0.03	0.27	0.17	0.5	0.47	0.26	0.39	0.02	0	0.13	0	0.32	0
XLOC_001876	0	0.54	0.79	0.23	0.43	0.76	1	0.58	0.64	1.19	1.33	0.5	0.51	0.41	0.97	0.84	0.47	1.12	0.29	0.43	0.53	0.35	0.29	0.5	0.65	0.48	0.53	0.83	0.95	1.48	0.98	0.4	0.79	1.03	1.36	1.35	0.31	2.26	1.35	1.07	0.6	0.4	0.16	0.22	0.43	0.79	0.3	0.35	1.64
XLOC_001878	0.26	0	0	0.05	0.06	0	0	0	0.15	0.2	0.23	0.07	0.49	0.18	0.14	0.11	0.23	0.4	0.07	0.13	0.18	0.63	0.05	0.44	0.04	0.25	0.11	0.34	0.24	0.39	0	0.08	0.19	0.19	0.06	0.06	0.11	0	0.22	0	0.36	0.6	0	0.07	0.15	0.27	0	0.22	0.22
XLOC_001879	0	0.08	0.08	0.14	0	0.25	0	0.2	0	0.12	0.03	0.15	0	0.19	0.16	0.47	0.04	0	0.06	0.06	0	0.14	0.14	0.34	0	0	0.13	0.24	0	0.1	0	0.18	0	0.17	0.16	0.17	0	0	0	0.06	0	0.13	0.19	0.17	0	0	0.04	0.16	0
XLOC_001883	0.57	0.03	0.31	0.63	0.48	0.07	0.57	0.13	0.49	0.39	0.28	0.47	0.11	0.19	0.39	0.14	0	0.02	0.21	0.38	0	0.02	0.08	0.07	0	0.01	0.15	0.11	0.09	0.02	0.02	0	0.07	0.12	0.27	0.12	0.11	0.02	0.17	0	0.18	0.15	0.47	0.79	0.34	0.16	0.47	0.33	0.12
XLOC_001890	0.19	0.04	0.05	0.1	0.51	0.17	0.36	0.4	0.87	0.65	0.74	0.68	1.12	0.29	0.79	1.01	0.28	0.1	0.59	0.38	1.11	0.63	0.36	0.39	0.15	0.11	0.11	0.5	0.57	0.62	0.21	0.75	0.66	0.29	0.3	0.13	1	1.34	0.75	0.58	0.57	0.28	0.22	0.42	0.88	0.47	0.48	0.53	0.22
XLOC_001891	0.53	0.44	0.15	0.22	0.36	0.21	0.71	0.39	0.05	0.13	0	0.09	0.02	0.25	0.22	0.12	0.12	0.06	0.12	0.12	0.07	0	0.06	0.03	0.09	0	0	0	0.05	0.34	0	0.1	0.32	0	0.08	0	0.14	0.46	0	0	0.42	0.2	0.25	0.2	0.19	0.2	0.27	0.05	0.05
XLOC_001893	0	0.33	0.05	0	0	0.3	0.06	0.19	0.08	0.11	0.29	0.33	0.49	0.44	0.31	0.57	0.1	0.11	0	0.14	0.06	0.26	0.33	0.12	0	0.04	0.28	0.07	0	0.25	0.11	0.17	0	0.16	0.13	0	0.42	0.22	0.08	0.08	0	0.58	0.2	0.07	0.33	0.46	0.24	0.47	0.16
XLOC_001896	0	0.14	0	0	0	0.61	0.13	0.31	0	0	0.07	0.11	0	0.2	0.04	0	0.05	0	0	0	0	0.17	0	0	0	0	0	0.22	0	0.17	0	0	0	0.16	0.13	0	0.06	0	0	0	0	0.19	0	0.11	0	0.09	0.24	0	0
XLOC_001900	0.41	0.79	0.74	0.84	1.35	0.68	0.95	0.76	0.2	0.11	0.23	0.33	0.33	0.15	0.21	0.28	0.24	0.16	0.49	0.13	0.06	0.29	0.35	0.12	0.12	0.45	0.64	0.16	0.47	0.27	0.53	0.61	0.3	0.36	0.58	0.07	0.15	0.11	0.48	0.19	0.17	0.38	0.79	0.12	0.41	0.41	0.33	0.21	0.43
XLOC_001904	0.75	0.51	0	0.07	0	0.61	0.09	0.25	0.17	0.17	0.15	0.1	0.23	0.11	0.16	0.05	0.07	0.22	0.09	0.09	0.21	0.23	0.26	0.12	0	0.13	0.08	0.07	0.06	0.08	0	0	0.17	0.31	0.04	0.28	0.12	0.24	0	0	0.23	0.31	0.16	0.05	0.97	0.51	0.41	0.19	0.11
XLOC_001905	0	0	0	0	0.08	0	0	0.21	0	0	0.08	0.25	0.38	0.13	0.04	0	0	0	0.47	0.15	0.21	0.19	0	0.07	0	0.04	0.3	0.36	0.43	0	0.08	0	0	0	0	0.08	0	0	0.18	0	0	0.17	0	0.31	0.23	0.19	0.47	0.16	0
XLOC_001908	1.04	1.41	0.75	1.02	1.02	0.85	0.39	0.54	0.4	0.42	0	0.26	0.46	0.52	0.07	0.21	0.26	0.38	0.06	0.18	0.11	0.07	0.05	0.11	0.31	0.24	0.52	0.45	0.19	0.11	0.03	0.11	0.4	0.27	0.29	0.66	0.53	0.19	0	0	0.03	0.3	0.69	0.09	0	0.48	0.21	0.33	0.28
XLOC_001911	0.12	0.22	0.12	0.06	0.12	0.49	0.11	0.25	0.12	0.19	0.08	0.06	0.09	0.02	0.02	0.07	0.06	0.06	0	0.04	0.04	0.2	0	0.1	0	0.07	0	0	0.15	0.19	0	0.15	0	0.03	0	0.12	0	0.3	0.05	0.05	0.04	0.13	0.16	0.06	0.07	0.07	0	0.19	0.09
XLOC_001913	0.04	0.11	0.06	0.13	0.35	0	0.18	0.35	0.14	0	0.08	0.06	0	0.02	0.09	0.32	0.2	0.34	0.04	0.7	0.36	0.1	0.45	0.68	0.09	0.44	0.22	0.23	0.12	0	0.11	0.25	0.2	0.09	0.19	0.2	0.03	0.46	0.23	0.09	0.09	0.2	0.02	0.02	0.17	0.05	0.22	0.33	0.41
XLOC_001914	1.93	1.24	1.56	1.98	2.28	2.67	1.95	1.92	1.42	2.44	1.83	2.43	2.82	3.25	2.38	2.6	1.45	1.9	2.3	1.6	2.62	2.35	2.27	2.73	1.16	0.61	2.39	1.48	2.17	2.71	1.81	2.49	1.5	1.47	1.85	3.78	2.87	3.3	2.85	1.63	1.7	0.79	2.22	2.66	2.09	1.6	2.43	1.7	1.04
XLOC_001915	0	0	0	0	0	0.15	0.26	0.2	0	0	0	0	0	0.03	0.19	0	0	0	0	0	0	0	0	0	0	0	0	0	0	0.41	0.12	0.03	0	0	0	0	0	0.47	0.2	0	0	0	0	0	0	0	0.04	0	0
XLOC_001916	0	0.25	0.05	0.12	0	0.06	0	0	0	0.12	0	0.12	0.04	0	0	0	0	0.06	0.15	0.22	0	0	0.06	0.13	0.08	0.04	0.08	0.12	0.05	0	0	0.05	0	0	0	0	0	0	0.09	0	0	0	0	0.83	0.27	0	0.2	0.05	0.08
XLOC_001918	0.14	0.39	0.05	0	0.1	0.09	0.12	0.18	0.12	0.12	0.11	0.16	0.09	0.1	0	0.04	0.05	0.05	0	0	0	0.12	0.13	0.09	0	0.2	0	0	0	0.06	0.05	0.1	0	0	0.06	0	0	0.17	0	0	0.34	0.02	0.02	0.07	0.02	0	0.11	0.05	0
XLOC_001919	0.6	0.31	0.12	0.24	0.24	0.14	0.17	0.07	23.35	19.17	13.78	29.74	32.54	26.55	24.13	28.64	0.82	0.57	2.15	1.41	3.42	2.16	3.54	4.1	0.62	1.13	2.7	1.98	3.44	1.44	3.68	2.87	1.52	2.87	4.5	13.28	17.71	7.68	10.38	10.78	0.38	0.37	0.32	0.6	0.56	0.46	1.05	1.22	0.74
XLOC_001927	0.3	0.29	0.18	0.14	0.08	0.3	0.04	0.15	0.2	0.29	0.13	0.09	0.05	0.05	0.07	0	0.12	0.1	0.09	0.29	0.08	0.05	0.03	0.11	1.29	0.23	0.05	0.04	0.45	0.05	0.05	0.29	0.34	0.06	0.16	0.42	0.11	0.18	0.1	0.24	0.24	0.3	0.24	0.26	0.28	0.08	0.06	0.14	0
XLOC_001932	0.28	0.19	0.23	0.4	0.27	0.24	0.42	0.49	0.62	0.26	0.12	0.24	0.22	0.47	0.05	0.16	0.62	0.35	0.32	0.04	0.5	0.56	0.4	0.27	0.1	0.1	0.26	0.19	0.03	0.27	0	0.22	0.5	0.27	0.13	0.58	0.04	0	0.11	0	0.43	0.68	0.67	0.28	0.24	0.83	0.47	0.53	0.26
XLOC_001938	0.06	0.13	0.09	0	0	0	0.06	0.23	0.19	0.4	0.17	0.24	0.72	0.04	0	0.07	0.45	0.49	0.26	0.06	0.06	0.54	0.2	0.16	0.04	0.28	0.18	0.07	0.04	0.08	0.14	0.04	0.28	0.38	0.06	0.19	0.27	0.4	0.3	0.22	0.91	0.35	0.5	0.29	0.26	0.58	0	0	0.22
XLOC_001945	3.76	2.34	0.47	0.2	0.68	0.11	0.2	0.15	1.95	1.63	1.93	2.94	3.89	5.71	2.03	1.47	2.74	1.6	0.87	0.71	1.6	0.79	0.58	0.48	1.74	1.94	1.43	0.9	0.65	0.95	0.81	0.19	2.19	2.21	1.82	2.11	1.52	1.16	1.75	1.41	2.52	3.41	1.04	1.2	1.13	1.48	0.82	0.35	1.95
XLOC_001946	136	1.01	1.17	157.86	1.77	245.34	212.89	860.44	66.09	0.35	0.53	138.45	0.81	92.7	80.11	535.06	0.38	88	0.62	165.84	1.59	174.1	132.43	961.67	254.92	1.3	0.99	264.09	4.58	402.05	439.84	2020.77	208.83	1.34	1.44	686.23	5.41	258.59	393.62	2554.23	166.33	0.63	0.44	150.89	2.66	434	247.4	2007.82	82.53
XLOC_001949	0	0	0	0	0	0	0	0	0.23	0	0.28	0.05	0.11	0.12	0.03	0.12	0.87	2.11	1.05	0.98	0.51	0.6	0.29	0.42	1.49	0.33	0.42	0.63	0.21	0.28	0.08	0.82	1.59	0.76	0.56	0.15	0.13	0.29	0.21	0.23	1.49	0.64	0.36	0.59	0.41	0.54	0.44	0.42	1.95
XLOC_001950	0.68	0.18	0.2	0.11	0.07	0.88	0.06	0.85	0.24	0.04	0	0.11	0.37	0.35	0.34	0.24	0.24	0.16	0	0.13	0.06	0.17	0	0.06	0.08	0.04	0.04	0.28	0.21	0	0.07	0.08	0.1	0.05	0.32	0.33	0	0.14	0.16	0.39	0.3	0.19	0.08	0.45	0.04	0.21	0.46	0.37	0
XLOC_001954	2.2	0.39	0.36	1.2	0.76	1.37	0.43	2.05	0.17	0.08	0	0.02	0.1	0.52	0.21	0.37	0.02	0.2	0	0	0.02	0.16	0	0.28	0.01	0	0.09	0	0.11	0.14	0.04	0.07	0.1	0.05	0.02	0	0.04	0.27	0.05	0.32	0.05	0.05	0.02	0.03	0.14	0.32	0.01	0.27	0.2
XLOC_001961	57.6	1.1	0.62	47.74	0.28	63.52	37.76	34.61	39.18	0.58	0.15	18.79	0.31	25.8	26.41	29.87	0.25	30.54	0.06	23.1	0.1	45.04	44.59	18.22	14.89	0.38	0	18.8	0.07	35.37	31.11	19.14	21.53	0.17	0.22	23.72	0.2	37.59	53.92	15.08	25.16	0.1	0.29	22.71	0.17	43.6	50.85	17.5	21.68
XLOC_001965	0.05	0.05	0.05	0	0	0	0	0.04	0.34	1.12	0.19	1.09	0.71	1.9	2.01	3.32	1.05	0.43	0.1	0.19	0.02	0.09	0.08	0.44	0.23	0.76	0.56	0.36	0.02	0.33	0.17	0.52	0.42	0.82	0.23	0.62	0.08	0.35	1.04	0.71	0.05	0.28	0.3	0.12	0.14	0.19	0.3	0.71	0.3
XLOC_001966	0.1	0.18	0.07	0.12	0.15	0.22	0	0.09	0.09	0.27	0	0.14	0.06	0.03	0	0.03	0.59	0	0.1	0.1	0	0	0.12	0.18	0.15	0.06	0.06	0.08	0	0	0	0	0.19	0.31	0	0.2	0	0	0.12	0.12	0.06	0.37	0	0.05	0.06	0.16	0.04	0	0.06
XLOC_001967	0.74	0.7	0.11	0.43	0.02	1.11	0.07	1.07	0.33	0.04	0.04	0.27	0	1.72	0.1	0.57	0.16	0.36	0.15	0.24	0	0.63	0.06	0.57	0.24	0.24	0.08	0.1	0.02	0.41	0.04	0.35	0.41	0.16	0.28	0.53	0.08	1.23	0.06	0.45	0.67	0.22	0.1	0.45	0.01	0.73	0.13	0.55	0.7
XLOC_001968	0	0.05	0.05	0.05	0.2	0	0	0.06	0.28	0.25	0.18	0.04	0.3	0.12	0.19	0.2	0.24	0.11	0	0.07	0.25	0.08	0.11	0.23	0.12	0.19	0.04	0	0.17	0.41	0.07	0.04	0	0.15	0.13	0.07	0	0	0	0.15	0.04	0.23	0.38	0.07	0.28	0	0.14	0.09	0
XLOC_001971	0.72	0.38	0.9	0.83	0.36	0.97	0.96	1.17	4.24	2.79	4.97	5.74	3.52	3.54	4.31	3.16	0.55	0.43	0.69	0.67	0.69	1.08	1.05	1.31	0.36	0.42	1.22	0.86	1.15	0.65	1.64	1.55	2.21	2.53	7.52	5.07	2.66	2.74	6.15	7.85	0.38	0.29	0.7	2.25	1.05	0.63	1.88	0.98	0.32
XLOC_001972	0.07	0.15	0.31	0.4	0.54	0.39	0.54	0.21	0	0.02	0.22	0.27	0.41	0.32	0.25	0.38	0.05	0.09	0.05	0.31	0.23	0.1	0.08	0.09	0.01	0.13	0.22	0.17	0.08	0.15	0.13	0.08	0.07	0	0.19	0.28	0.2	0.1	0.35	0.25	0.05	0.02	0.2	0.41	0.23	0.32	0.1	0.22	0.08
XLOC_001973	2.28	44.93	9.9	16.12	25.09	2.22	1.63	2.48	1.17	122.07	9.03	23.42	14.98	1.06	0.59	1.17	122.48	1.7	8.85	21.66	29.68	1.87	0.82	1.97	1.69	155.63	11.52	29.17	32.98	1.6	1.45	2.32	1.44	90.24	16.97	49.68	42.46	4.19	2.86	2.81	1.24	81.76	7.66	16.41	27.67	1.24	0.86	1.28	1.79
XLOC_001975	1.7	2.4	2.7	2.22	0.51	0.8	1.37	1.53	0.77	0.97	0.99	1.24	1.17	2.24	1.27	0.89	0.81	0.52	1.09	0.9	0.56	0.47	0.51	0.73	0.66	1.09	2.08	0.87	0.47	0.54	0.35	0.68	1.16	1.32	1.47	0.86	0.44	0.32	1.73	0.9	0.57	0.68	0.85	0.66	0.64	0.65	0.56	0.26	1.34
XLOC_001976	0.51	0.34	0.66	0.73	0.45	0.2	0.42	0.57	0.27	0.24	0.02	0.61	0.15	0.23	0.1	0.35	0.13	0.14	0.19	1.21	0.12	0.22	0.33	0.83	0.26	0.38	0.23	0.48	0.52	0.33	0.54	0.48	0.03	0.48	0.21	0.4	0.16	0.1	0.69	0.16	0.15	0.3	0.08	0.51	0.16	0.5	0.5	0.72	0.16
XLOC_001977	8.35	5.52	16.09	5.69	7.89	8.16	4.49	8.3	6.56	8.27	10.22	5.44	13.74	13.58	8.42	8.25	7.61	4.56	9.56	5.38	9.6	8.44	6.49	9.79	5.76	4.76	16.53	5.18	8.7	7.36	3.72	7.37	7.35	10.14	17.37	5.41	8.79	9.11	8.04	6.23	8.14	7.88	16.34	8.27	11.08	10.91	8.99	11.41	3.48
XLOC_001979	0.06	0.03	0.03	0.03	0.01	0.01	0.07	0	1.73	0.8	1.05	1.46	6	7.52	6.06	1.88	0.82	1.07	0.8	0.32	0.33	0.67	0.32	0.28	0.86	0.86	0.95	0.35	0.54	0.72	0.23	0.47	1.08	0.56	1.11	1.32	0.57	1.07	3.91	0.5	0.66	0.51	0.86	0.47	0.57	1.17	0.66	0.29	0.8
XLOC_001982	0.05	0.12	0.3	0.01	0.14	0.24	0.13	0.16	0.03	0.07	0	0	0	0	0.01	0	0.01	0	0	0	0	0	0	0	0	0.01	0	0	0	0.04	0	0	0	0.07	0	0	0.13	0	0	0	0.02	0.02	0.02	0.01	0.01	0.09	0.06	0	0
XLOC_001985	0	0	0	0	0	0	0.02	0	0.28	0.05	0.24	0.27	0.23	0.21	0.1	0.08	0.3	0.29	0.27	0.3	0.26	0.14	0.05	0.27	0.39	0.25	0.55	0.52	0.53	0.15	0.04	0.05	0.19	0.08	0.06	0.31	0.15	0.46	0.16	0.1	0.16	0.31	0.11	0.03	0	0	0.23	0.02	0.45
XLOC_001986	0.84	0.69	0.7	0.88	0.76	1.2	0.84	0.99	0.2	0.43	0.22	0.28	0.21	0.42	0.29	0.13	0.39	0.28	0.18	0.44	0.31	0.3	0.52	0.29	0.11	0.27	0.2	0.38	0.23	0.29	0.22	0.32	0.12	0.15	0.3	0.2	0.16	0.57	0.11	0.1	0.4	0.77	0.51	0.73	0.51	0.75	0.4	0.79	0.13
XLOC_001990	0.08	0.16	0.06	0.25	0.53	1.01	0.29	0.62	0.23	0.37	0.16	0.21	0.29	0.18	0.21	0.27	0.06	0.42	0.08	0.23	0	0	0.49	0.33	0.3	0.09	0.22	0.4	0.05	0.14	0.29	0.19	0.28	0.17	0.44	0.23	0.27	0.32	0.36	1.05	0.04	0.3	0.26	0.24	0.05	0.37	0.37	0.11	0
XLOC_001991	0.04	0.09	0.22	0.03	0	0	0	0	0.18	0	0.25	0.21	0	0.2	0.17	0.1	0	0.17	0.13	0.04	0	0	0	0	0.07	0.07	0.54	0	0	0.13	0	0.08	0.13	0	0.66	0.04	0	0.54	0	0	0.07	0	0.22	0	0.03	0.32	0	0	0.25
XLOC_001994	0.97	1.79	1.47	1.49	1.38	1.02	1.04	1.38	0.16	0.23	0.25	0.17	0.76	0.49	0.36	0.44	0.42	0.33	0.54	0.47	0.49	0.13	0.47	0.41	0.09	0.35	0.61	0.03	0.47	0.68	0.35	0.17	0.16	0.28	1.11	0.53	0.37	0.61	0.31	0.12	0.77	0.71	0.39	0.73	0.89	0.71	0.59	1.06	0.24
XLOC_001996	0	0.1	0.07	0.22	0	0.04	0.22	0.04	0	0	0	0.05	0	0	0	0.03	0.03	0	0.05	0	0	0	0.08	0.08	0	0	0	0	0	0	0	0.15	0	0	0	0	0	0	0.05	0	0.6	0	0	0	0	0.03	0	0.03	0
XLOC_002003	0.14	0.34	0.15	0.4	0.37	0.23	0.75	0.04	0.33	0.63	0.22	0.21	0.34	0.23	1.39	0.28	0.57	0.27	0.17	0.08	0.37	0.21	1.55	0.2	0.26	0.44	0.23	0.13	0.23	0.16	1.13	0.13	0.35	0.86	0.38	0.18	0.49	0.1	1.98	0.32	0.3	0.62	0.15	0.2	0.44	0.3	1.5	0.14	0.17
XLOC_002006	0.14	0.14	0	0.05	0.2	0.24	0.06	0.06	0.04	0.29	0.07	0.04	0.04	0.16	0	0	0.2	0.05	0.35	0.27	0	0.25	0.06	0	0.04	0.19	0.47	0.29	0.04	0.04	0	0	0.15	0.1	0.06	0	0.12	0	0.24	0	0.04	0	0.31	0.35	0.21	0	0.14	0.05	0.39
XLOC_002009	0.13	0.09	0.1	0.11	0.53	0.15	0.09	0.33	0.02	0.02	0.11	0	0.2	0.21	0.04	0.12	0	0	0.1	0	0.12	0.04	0.24	0.03	0	0.11	0.04	0.11	0.15	0.06	0.11	0.04	0.12	0.02	0.06	0.07	0.17	0	0.08	0	0	0.07	0.09	0.26	0.2	0.14	0.05	0.02	0
XLOC_002011	0.08	0.24	0.15	0.04	0.15	0.18	0.23	0.16	0.07	0.2	0.19	0	0.1	0.14	0.17	0.09	0	0.06	0	0	0.07	0.09	0.2	0.07	0	0.14	0.03	0.05	0.19	0.03	0.03	0.23	0	0.11	0.07	0.02	0.2	0.29	0.18	0.12	0.13	0.03	0	0.03	0.11	0.03	0.1	0	0
XLOC_002013	0	0	0	0	0	0	0	0	0	0	0.04	0.38	0.04	0	0	0.18	0	0	0	0	0	0	0	0	0	0	0	0	0	0	0	0	0	0	0.07	0	0	0	0	0.09	0	0	0	0	0	0	0	0	0
XLOC_002015	0	0	0	0	0	0	0	0	0.08	0	0.03	0.24	0	0	0	0.03	0	0.11	0	0.31	0.05	0	0	0.1	0	0.02	0	0	0	0	0	0	0.1	0.02	0.08	0.17	0	0	0	0	0.06	0	0	0	0	0	0	0	0.03
XLOC_002020	0.25	0	0	0	0	0.43	0	0	0.36	0	0	0	0	0.63	0	0	0	0.35	0	0	0	0.91	0	0	0.09	0	0	0.02	0	0.25	0	0	0.36	0	0	0	0	0.39	0	0	0.71	0	0	0	0	0.5	0	0	0.33
XLOC_002024	0	0	0	0.02	0	0	0	0	0	0	0	0.61	0	0.06	0.35	0	0.04	0	0	0.05	0	0	0.04	0	0	0.03	0	0.01	0	0	0.03	0	0	0	0	0	0	0	0.73	0.06	0.12	0.06	0.14	0.11	0	0	0.43	0	0
XLOC_002029	0	0.19	0	0.14	0.14	0.36	0.22	0.24	0.06	0.24	0.16	0.07	0.15	0.19	0.29	0.24	0.34	0	0.24	0.2	0	0.17	0.22	0.86	0.1	0.74	0.35	0.05	0.11	0.25	0.26	0.55	0.1	0.59	0.29	0.03	0.15	0.71	0.76	0.9	0	0.25	0.43	0	0.57	0.58	0.42	0.54	0.04
XLOC_002032	0	0.1	0	0	0.07	0.04	0	0.01	0.01	0.4	0	0.02	0.06	0.04	0.12	0.03	0.37	0.03	0	0	0	0.01	0.08	0.02	0	0.2	0	0	0.01	0.03	0.08	0	0	0.39	0	0	0	0.16	0.13	0.02	0	0.09	0	0.02	0	0	0.05	0.03	0.04
XLOC_002033	0	1.32	0	0	0.06	0.11	0.95	0.16	0	0.1	0.06	0.03	0.13	0.07	0.4	0	0.35	0	0.06	0	0	0.07	0.68	0	0	0.33	0	0	0	0	0.26	0	0	0.27	0	0.06	0.1	0	0.28	0	0.03	0.47	0.07	0	0.14	0	0.5	0	0
XLOC_002036	0	0.02	0.02	0	0	0	0	0.08	0.09	0.17	0.31	0.07	0.07	0.02	0.33	0.09	0.09	0	0	0.09	0.03	0	0.03	0.08	0.2	0.02	0.05	0	0	0	0.36	0.1	0.37	0.38	0.48	0.28	0.25	0.03	0.44	0.97	0	0	0	0	0	0	0	0.06	0.14
XLOC_002039	0.88	0.84	1.27	0.91	0.74	1.11	0.33	0.9	0.91	0.56	0.41	0.37	0.29	0.22	0.22	0.56	0.28	0.07	0.4	0.17	0.64	0.05	0.21	0.15	0.67	0.44	0.22	0.83	0.14	0.77	0	0.57	0.19	0.62	0.91	0.35	0.23	0.23	0.36	0.75	0.02	0.48	0.32	0.4	0.63	0.35	0.21	0.66	0.45
XLOC_002040	0.02	0.01	0.34	0.05	0.02	0	0.04	0	0.03	0.07	0.28	0.07	0.12	0.03	0.38	0.09	0.01	0.02	0.28	0.02	0.09	0.02	0.19	0.1	0	0	0.48	0.06	0.14	0	0.05	0.02	0.03	0.07	0.46	0.04	0.1	0	0.32	0.02	0.03	0	0.33	0.03	0.02	0	0.38	0.01	0.02
XLOC_002048	0.27	0.24	0.28	0.71	0.22	0.68	0.58	0.78	2.62	2.85	3.65	4.33	2.63	3.91	3.66	2.17	0.39	0.31	0.52	0.67	0.47	0.69	0.68	0.76	0.24	0.47	1.2	0.77	0.48	0.72	0.86	0.8	1.54	1.64	4.4	3.87	2.18	3.75	3.7	5	0.19	0.17	0.59	1.28	0.47	0.71	1.14	0.87	0.19
XLOC_002055	0	0	0	0.12	0	0	0	0	0.05	0	0.16	0	0	0	0	0	0.27	0.24	0.23	0.07	0.56	0	0.06	0	0.13	0.04	0.04	0.04	0.05	0.09	0	0	0.06	0.11	0	0.08	0.07	0	0	0	0.08	0	0.04	0	0.05	0	0	0.05	0.17
XLOC_002063	0.85	1.09	0.58	0.37	1	0.37	0.98	1.39	0.65	0.25	0.44	0.09	0.09	0.14	0.24	0.07	1.09	3.11	5.93	3.06	5.58	5.68	5.71	3.6	1.07	2.85	2.46	3.2	1.09	1.22	0.07	0	0.34	0.54	0.24	0.79	0.73	1.14	0.05	0.24	0.8	0.77	2.88	1.14	1.36	2.69	2.22	2.02	1.1
XLOC_002064	0	0	0	0	0	0	0	0.04	0.62	0.32	0.53	0.35	0.73	1.02	0.41	0.45	0.35	0.22	0.08	0.12	0.04	0.05	0.03	0.07	0.62	0.25	0	0	0	0.51	0.02	0	0.38	0.24	0	0.04	0.14	0.08	0.05	0	0.43	0.31	0.05	0.06	0	0.12	0	0.22	0.42
XLOC_002065	0.01	0	0.01	0	0	0	0	0	4.76	5.56	2.94	3.73	4.31	4.19	2.14	2.76	2.8	2.12	0.47	1.16	0.68	1.48	0.31	1.42	1.88	2.16	0.49	1.27	0.95	1.32	0.17	1.15	1.96	1.9	0.98	1.48	1.03	1.87	0.68	2.1	1.56	1.58	0.45	0.83	0.82	1.22	0.05	1.14	2.08
XLOC_002072	0.01	0	0.01	0	0.03	0	0.01	0.01	0.66	0.74	1.22	1.41	1.38	1.16	1.07	1.33	0.12	0.12	0.15	0.28	0.13	0.1	0.12	0.19	0.11	0.09	0.24	0.29	0.12	0.09	0.16	0.14	0.25	0.23	0.71	0.74	0.76	0.39	0.87	0.92	0.09	0.02	0.29	0.24	0.03	0.06	0.09	0.1	0.07
XLOC_002073	0.19	0.03	0.03	0	0	0.22	0.16	0.04	1.07	0.45	0.44	0.72	0.38	0.99	0.07	0.53	0.08	0.67	0.15	0.29	0.15	0.28	0.19	0.25	0.12	0.06	0.05	0.1	0	0.3	0.01	0.47	0.69	0.19	0.2	0.29	0.22	0.83	0.1	0.26	0.32	0	0.07	0.05	0	0.01	0.14	0.13	0.33
XLOC_002077	0	0.03	0.06	0.03	0.08	0.43	0.11	0.07	0.07	0.07	0.09	0.09	0.07	0.07	0.12	0.29	0	0	0.46	0.12	0.08	0	0.3	0.04	0.33	0.25	0.19	0.19	0	0.15	0.09	0.38	0.03	0	0.12	0	0.07	0.17	0	0.05	0.05	0.3	0	0.15	0.12	0.15	0.2	0.14	0.19
XLOC_002078	0	0.08	0	0.09	0	0	0	0	0.07	0	0	0.12	0	0.03	0	0	0.04	0	0	0.44	0	0.21	0.36	0.14	0	0.12	0.06	0.35	0.28	0.13	0.06	0.24	0	0	0	0	0	0.12	0	0	0.03	0.03	0.13	0.31	0.03	0	0	0.04	0
XLOC_002083	0.11	0	0.19	0.15	0.04	0.1	0.03	0.13	0.22	0.08	0.16	0.12	0.14	0.26	0.02	0	0.13	0.03	0.08	0.15	0.07	0.14	0.06	0.06	0	0.02	0.04	0	0.12	0	0	0.05	0.05	0	0.07	0.26	0	0.04	0	0	0.02	0	0.25	0.32	0.11	0.09	0	0.03	0.13
XLOC_002084	0.07	0.15	0.27	0.03	0.07	0.13	0.07	0.03	1.31	1.48	1.1	2.06	1.85	2.75	1.54	2.43	1.59	1.09	0.83	1.09	0.74	0.14	1.03	0.83	0.37	0.24	0.33	0.71	0.23	0.18	0.32	0.41	0.48	0.63	0.8	0.4	0.38	0.04	2.24	1.55	0.14	0.16	0.21	0.04	0.13	0.25	0.08	0.18	0.46
XLOC_002088	0.05	0.03	0.05	0.03	0.08	0.35	0.06	0.24	0.06	0	0.01	0.02	0.02	0.02	0.02	0	0.05	0.03	0.02	0	0.02	0	0.01	0.06	0.02	0.14	0.03	0	0	0	0.02	0.06	0.21	0.08	0.08	0.1	0.04	0	0.04	0	0.1	0.03	0.04	0.09	0.01	0	0.02	0.02	0
XLOC_002089	0.1	0.12	0.21	0.11	0.33	0.39	0.23	0.19	0.06	0	0.11	0.01	0	0.02	0.01	0	0.19	0.31	0.45	0.33	0.3	0.33	0.23	0.22	0.4	0.19	0.26	0.25	0.29	0.39	0.39	0.24	0.24	0.23	0.05	0.02	0.03	0.12	0.08	0.05	0.35	0.23	0.52	0.42	0.5	0.47	0.5	0.54	0.21
XLOC_002091	0.13	0.09	0.15	0.1	0.2	0.08	0.09	0.03	0.13	0.12	0.13	0.18	0.2	0.06	0.13	0.08	0.28	0.22	0.27	0.2	0.19	0.21	0.22	0.24	0.22	0.44	0.21	0.39	0.19	0.09	0.16	0.39	0.26	0.33	0.56	0.11	0	0.12	0.09	0.08	0.13	0.32	0.47	0.26	0.13	0.09	0.27	0.22	0.13
XLOC_002098	0.29	0.45	0.18	0.13	0.28	0.04	0	0	0	0.09	0	0	0	0.07	0	0.07	0.18	0.03	0.08	0	0	0.15	0	0	0	0.34	0	0	0	0	0	0.08	0.03	0.37	0.23	0.2	0	0.04	0.05	0	0	0.27	0	0	0.1	0.05	0	0.14	0
XLOC_002101	0.14	0.17	0.16	0.09	0.16	0.05	0.08	0.2	0.31	0.03	0.09	0.09	0.36	0.05	0.09	0.08	0.08	0.23	0.14	0	0.02	0.13	0	0.07	0.02	0.09	0.05	0	0.05	0.1	0.03	0.03	0.18	0.27	0.05	0.13	0.07	0.11	0.22	0.06	0	0.09	0.26	0.04	0	0.02	0.17	0.02	0.16
XLOC_002102	0.04	0.18	0.22	0.09	0	0.23	0.07	0.33	0.11	0.02	0.08	0.32	0.08	0.04	0	0.15	0.05	0.55	0.08	0	0.07	0.14	0.27	0.1	0.25	0.08	0.11	0.14	0.14	0.11	0	0	0.05	0	0	0	0	0.31	0	0.3	0	0.17	0.19	0	0.16	0	0.23	0.05	0.04
XLOC_002103	0	0.12	0.13	0.05	0	0	0.05	0	0.31	0	0.12	0.16	0	0	0.07	0.27	0	0	0.06	0.06	0	0	0	0.05	0	0	0.03	0.03	0	0	0	0.25	0	0.22	0.11	0	0.1	0.61	0.28	0.27	0	0	0.1	0	0.07	0	0.12	0.2	0
XLOC_002107	0.02	0.08	0.12	0.08	0.07	0.19	0.05	0	0.03	0.09	0.23	0.31	0.17	0.01	0.16	0.01	0.04	0.15	0.25	0.26	0.53	0.06	0.31	0.21	0.17	0.48	0.19	0.59	0.24	0.22	0.3	0.27	0.07	0.05	0.46	0.34	0.38	0	0.28	0	0.22	0.11	0.14	0.36	0.68	0.04	0.68	0	0.08
XLOC_002110	0	0	0	0	0	0	0	0	0.17	0.22	0.44	0.24	0.19	0.16	0.02	0.35	0.2	0.11	0.11	0.17	0.03	0	0.06	0.21	0.1	0.12	0.34	0.17	0	0	0	0	0.15	0.37	0.89	0.03	0.24	0.07	0.41	0.12	0	0	0	0	0	0.02	0	0	0.2
XLOC_002111	0	0.05	0	0	0	0	0	0	0	0	0	0.08	0	0	0.04	0	0	0.18	0	0.07	0	0	0.06	0	0	0	0	0.2	0	0	0.58	0.05	0	0	0	0	0	0	0	0	0	0	0	0.08	0	0.23	0	0	0
XLOC_002112	0.03	0.02	0	0	0.1	0.02	0.01	0.02	0.55	0.25	0.09	0.1	0.05	0.13	0.05	0.04	0.07	0.34	0.18	0.09	0.05	0.08	0.02	0.14	0.15	0.14	0.09	0.05	0.01	0.01	0	0.08	0.48	0	0.27	0.19	0	0.2	0.06	0.06	1.31	0.69	0.42	0.24	0.06	0.09	0.06	0.13	0.61
XLOC_002113	0	0	0	0	0	0	0	0	0.09	0.47	0.04	0	0	0	0	0.04	0	0	0	0	0	0	0	0	0	0	0	0	0	0	0.04	0	0.27	0	0.07	0.44	0	0	0	0.08	0.12	0	0	0.15	0	0	0.15	0	0
XLOC_002114	0.03	0.06	0	0	0	0	0	0	0.27	0.03	0.28	0.13	0.08	0.14	0.05	0.04	0.06	0.35	0.06	0.18	0.27	0	0.1	0.03	0.12	0	0.1	0.17	0	0.18	0.03	0.26	0.09	0.27	0.03	0	0.03	0.13	0.07	0.1	0.1	0.15	0.14	0.03	0.04	0.11	0	0.04	0.17
XLOC_002121	0.2	0	0	0	0	0	0	0	0	0.08	0.03	0	0.08	0	0	0	0.04	0.12	0.1	0.15	0.05	0.25	0.04	0	0.14	0.11	0	0.08	0.19	0.06	0	0	0.04	0.08	0.05	0	0	0.11	0	0.12	0	0	0	0	0	0	0	0	0.12
XLOC_002122	0	0.17	0.02	0.02	0	0.14	0	0.02	0.13	0.01	0.12	0.01	0.22	0.03	0	0.18	0.3	0.13	0.42	0.16	0.15	0.34	0.24	0	0.45	0.11	0.31	0	0.03	0.02	0.68	0.07	0.04	0.08	0.23	0.16	0.31	0.09	0.26	0	0	0.03	0.12	0.03	0	0.02	0	0	0.19
XLOC_002123	0.08	0.04	0.1	0.06	0	0.16	0.02	0.07	0.22	0.42	1.53	0.99	2.6	1.11	1.25	1.5	0.16	0.2	0.1	0.16	0.11	0.39	0.24	0.26	0.08	0.07	0.1	0.27	0.05	0.1	0.12	0.01	0.28	0.15	0.58	0.55	0.95	0.35	0.76	0.97	0.26	0.02	0.12	0.08	0.14	0.11	0.08	0.43	0.23
XLOC_002128	0.23	0.4	0.26	0.4	0.27	1.22	0.67	0.93	0.24	0.14	0.1	0.19	0.2	0.18	0.05	0	0	0.28	0.46	0.04	0.08	0.11	0.15	0.23	0	0.03	0.1	0.21	0	0.3	0.05	0	0.23	0.24	0.04	0	0	0	0.11	0.15	0.4	0	0	0.25	0.27	0.11	0	0	0
XLOC_002133	0.53	0.18	0.72	0.21	0.13	0.17	0.61	0.47	1.21	0.52	0.38	1.05	0.54	1.65	0.73	0.69	1.14	0.41	0.34	0.19	0.18	0.24	0.32	0.45	0.33	0.8	0.75	0.48	0.37	0.48	0.28	0.45	0.58	1.08	1.3	0.45	0.4	1.44	0.62	0.37	0.37	0.18	0.37	0.13	0.2	0.08	0.14	0.45	0.15
XLOC_002135	0	0	0	0	0	0	0	0	0	0	0.11	0	0	0	0	0	0.1	0.06	0	0	0.33	0	0	0.06	0	0	0	0	0.23	0.39	0	0	0.16	0	0	0	0	0	0	0	0	0.24	0	0	0	0	0	0	0
XLOC_002136	0	0	0	0	0	0	0	0	0	0.03	0.26	0	0	0	0.01	0	0.02	0.04	0.1	0.07	0.11	0.03	0.02	0.19	0.12	0.16	0.07	0	0.09	0	0	0.03	0.09	0.04	0	0	0	0.05	0	0	0	0.03	0	0	0.1	0	0.02	0	0
XLOC_002147	0.06	0.1	0	0.02	0	0.12	0	0.02	0.02	0	0.12	0	0	0	0	0.02	0.1	0.07	0.03	0.14	0.08	0.1	0.2	0.36	0.05	0.02	0	0.35	0.02	0.02	0	0.31	0.04	0.1	0.11	0.19	0.07	0.18	0	0.13	0.33	0.06	0.08	0.14	0.05	0.09	0.17	0.1	0.25
XLOC_002148	0.64	0.1	0.19	0.14	0.92	0.06	0.13	0.04	0.4	0.21	0.13	0.22	0.99	0.2	0.19	0.27	0.12	0.43	0.27	0.18	0.82	0.27	0.05	0.11	1.17	0.15	0.4	0.19	1.07	0.37	0.14	0.15	0.65	0.22	0.33	0.26	1.14	0.26	0.24	0.3	1.13	0.14	0.23	0.18	0.93	0.11	0.13	0.19	0.59
XLOC_002149	1.1	1.35	1.06	0.46	0.98	0.36	0.82	1.63	0.31	0.11	0.25	0.08	0.28	0.15	0.23	0.36	0.07	0.04	0.27	0.15	0.1	0.13	0.29	0.13	0.06	0.14	0.59	0.3	0.13	0.03	0.23	0	0.38	0.19	0.1	0.05	0.14	0	0.67	0.12	0.23	0.2	0.94	0.16	0.44	0.51	0.57	0.18	0
XLOC_002151	0.13	0.16	0.05	0.11	0.23	0.06	0.12	0.32	0.04	0.07	0.1	0.12	0.31	0.09	0.09	0.08	0.14	0.1	0	0.13	0.36	0.04	0.19	0.31	0.07	0.31	0.36	0.09	0.06	0.18	0.34	0.1	0.05	0	0.09	0.13	0	0	0	0.15	0.02	0.6	0.24	0.07	0.08	0	0.47	0.11	0.04
XLOC_002154	0	0.12	0	0	0	0	0	0.05	0.03	0	0.12	0	0.03	0	0	0.13	0.25	0.27	0.35	0.28	0.16	0.07	0.18	0	0.1	0.47	0.36	0	0.82	0.31	0.56	0.28	0.21	0.13	0.48	0	0.35	0	0	0.32	0.13	0.35	0.45	0.12	0.07	0.24	0.23	0.31	0.13
XLOC_002155	0	0	0	0	0	0	0	0	0	0.02	0	0	0.02	0	0	0	0	0	0.21	0.04	0	0	0	0	0.02	0	0	0	0.03	0	0	0	0	0.12	0	0	0	0	0	0	0.28	0.11	0.89	0.51	0.2	0.83	0.11	0.06	0.19
XLOC_002156	0.18	0.1	0.41	0.28	0.34	0.11	0	0.31	0.01	0.03	0.04	0.03	0.03	0	0	0	1.1	1.29	0.43	1	0.53	0.4	0.2	0.05	1.79	2	0.12	0.33	0.24	0.81	0.02	0.24	0.65	0.81	0.1	0.04	0.02	0.12	0.01	0.12	0.88	1.04	0.26	0.3	0.2	0.12	0.15	0.05	1.72
XLOC_002157	0.05	0	0.34	0.11	0	0.08	0.17	0	0.03	0.18	0.17	0.05	0.03	0.08	0.21	0.08	0.14	0.11	0	0.09	0.39	0.12	0.11	0.29	0.27	0.05	0	0.17	1.1	0.51	0.15	0	0.24	0.07	0.09	0	0	0.59	0.28	0	0.13	0.23	0.03	0.1	0	0	0.42	0.1	0.32
XLOC_002160	0.22	0.41	0.38	0.18	0.81	0.23	0.52	0.33	0.24	0.18	0.33	0.1	0.08	0	0.27	0.15	0.59	0.12	0.8	0.51	0.68	0.68	1.1	0.83	0.48	0.37	0.65	0.53	1.03	1.03	1.47	2.09	0.33	0.8	0.77	0.37	0.52	0.19	0.3	0.21	0.99	1.09	1.15	1.79	1.24	2.77	2.87	2.51	0.3
XLOC_002162	0	0.13	0.05	0	0.07	0	0	0	0.26	0.26	0.53	0.46	0.47	0.42	0.52	0.35	0.16	0.17	0.23	0.11	0.1	0.14	0.12	0.03	0	0.04	0.08	0	0.09	0.25	0	0	0.27	0.06	0.18	0.15	0.29	0	0.22	0	0.08	0.08	0.02	0.08	0.09	0.05	0.05	0	0.25
XLOC_002163	0	0	0	0.14	0.16	0	0	0	0.04	0.02	0.02	0.03	0.02	0	0.03	0.02	0.22	0.17	0.2	0.17	0.14	0.09	0.33	0.17	0.42	0.04	0.13	0.43	0.04	0.13	0.15	0.01	0.06	0.02	0.08	0.06	0.08	0.12	0.12	0.17	0.08	0	0.1	0.08	0	0.04	0.18	0.08	0.03
XLOC_002169	1.08	1.09	0.94	0.53	1.1	0.5	0.54	0.48	0.53	0.61	0.49	0.17	0.29	0.58	1.17	0.39	0.29	0.48	0.27	0.17	0.2	0.22	0.18	0.31	0.03	0.12	0.43	0.28	0.22	0.35	0	0.19	0.49	0.2	0.42	0.44	0.58	0.56	0.42	0.71	0.42	0.56	0.13	0.57	0.13	0.14	1.07	0.12	0.35
XLOC_002172	0	0	0	0	0	0	0	0	0	0.09	0.35	0.09	0.03	0.1	0.19	0.13	0.08	0.09	0.06	0.11	0.25	0.14	0.18	0.05	0.09	0.15	0.06	0	0.28	0.07	0	0	0.16	0.13	0	0.06	0.39	0.41	0.46	0	0	0	0	0.11	0.03	0	0.08	0	0
XLOC_002173	0	0	0	0	0	0	0	0	0	0	0	0	0	0	0	0	0.2	0.52	0.29	0.09	0.31	0	0.06	0	0.29	0.1	0.01	0.04	0.09	0	0	0	0.04	0.04	0	0	0	0.12	0	0	0.28	0.09	0.06	0.25	0.12	0.08	0	0.03	0.28
XLOC_002175	0	0.11	0.15	0.13	0	0	0	0.05	0.09	0.25	0.08	0.14	0.09	0.12	0.06	0.15	0	0	0.22	0.16	0.05	0.07	0.09	0.09	0.09	0.03	0.36	0.5	0.03	0.1	0.17	0.07	0.08	0.24	0.25	0.16	0.09	0.17	0.12	0	0	0	0.15	0.11	0	0.03	0	0	0.06
XLOC_002176	0.13	0.04	0.1	0.03	0.07	0.03	0.03	0.03	0.02	0.02	0.1	0.07	0	0	0	0.02	0	0.1	0.17	0.06	0.06	0.04	0.19	0.06	0.09	0.18	0.04	0.16	0.21	0.2	0.02	0.2	0.19	0.1	0	0.03	0.37	0.07	0	0	0.04	0.05	0.02	0.12	0	0.12	0	0.11	0.19
XLOC_002177	0.35	0.36	0.38	0.14	0.04	0	0.08	0.27	0.28	0.53	0.32	0.23	0.33	0.2	0.27	0.05	0.22	0.3	0.18	0.09	0.4	0.05	0.31	0.08	0.1	0	0.15	0.09	0.08	0.34	0.09	0.11	0.38	0.36	0.08	0.09	0.04	0.09	0.31	0.59	0.24	0.1	0.02	0.13	0.05	0.26	0.24	0.06	0.25
XLOC_002178	0.16	0.04	0.14	0	0.06	0.08	0.12	0.14	0.24	0.25	0.23	0.08	0.26	0.04	0.52	0.16	0.11	0.1	0.13	0.22	0.32	0.46	0.1	0.19	0.21	0.03	0.34	0	0.53	0.32	0.24	0.16	0.5	0.05	0.59	0.56	0.19	0.56	0.48	0.61	0.24	0.1	0.18	0.24	0.21	0.3	0.41	0.09	0.11
XLOC_002182	0	0	0	0	0	0	0	0	0	0.11	0.29	0.05	0	0	0	0.09	0.07	0	0	0	0.14	0	0	0	0	0.08	0	0	0	0	0	0	0.04	0.04	0	0.15	0	0	0	0	0.03	0	0	0	0	0	0	0	0
XLOC_002184	0	0	0	0.09	0	0	0	0	0.03	0	0.03	0	0	0.16	0.21	0	0	0	0.11	0	0	0	0	0	0	0	0	0	0	0	0.12	0	0.12	0	0	0	0	0.11	0	0	0	0.03	0	0.03	0.42	0	0	0	0
XLOC_002191	0.02	0.11	0.11	0.11	0.17	0.2	0.01	0.07	0.22	0.41	0.71	0.18	0.44	0.62	0.09	0.2	0.25	0.1	0.43	0.08	0.14	0.4	0.17	0.17	0.04	0.22	0.28	0.07	0.28	0.44	0	0.04	0.1	0.27	0.5	0.13	0.14	0.48	0.13	0.19	0.02	0.25	0.52	0.05	0.27	0.5	0.21	0.08	0.1
XLOC_002192	0	0	0	0	0	0	0	0	0	0	0.28	0	0	0	0	0	0	0	0	0.19	0.04	0	0	0	0.14	0.03	0	0	0	0	0.61	0	0	0	0	0	0	0	0	0	0	0.03	0	0	0	0	0	0	0
XLOC_002193	0	0	0	0	0	0.21	0.04	0.09	0.23	0.18	0	0.03	0.03	0.03	0.03	0	0.14	0.07	0.1	0.09	0.26	0.06	0.27	0.16	0	0	0.03	0.1	0	0.09	0	0.09	0	0	0	0.05	0	0	0	0	0	0	0.03	0	0	0	0.03	0	0
XLOC_002195	0	0	0	0.06	0	0	0	0	0.09	0.04	0.48	0.45	0.42	0.35	0.47	0.58	0.33	0.12	0	0.45	0.35	0.09	0.31	0.07	0.09	0.09	0.13	0	0.05	0.09	0.13	0.14	0.51	0.75	0.94	0.23	0.94	1.45	0.54	1.14	0.47	0	0	0.2	0.55	0	0	0	0.26
XLOC_002196	0	0.01	0.04	0	0	0	0.02	0	0.21	0.12	0.07	0.09	0.24	0.09	0.47	0.13	0	0.04	0.07	0.03	0.05	0	0.04	0	0.01	0	0.06	0.03	0.06	0.03	0	0	0.47	0.23	0.5	0.39	0.15	0.28	0.32	0.19	0.1	0.03	0.01	0.03	0.01	0.06	0.14	0.03	0.04
XLOC_002205	0	0	0	0	0	0.01	0	0	0.4	0.54	0.41	0.13	0.24	0.18	0.35	0.23	1.11	0.59	0.57	0.49	0.85	0.54	0.79	1.1	0.76	0.61	0.51	0.36	0.39	0.43	0.59	0.42	0.29	0.48	0.33	0.33	0.56	0.34	0.63	0.49	0.32	0.19	0.03	0.09	0.08	0.07	0.04	0.03	0.43
XLOC_002210	0	0.05	0	0	0	0	0.03	0	0	0.02	0	0.04	0	0.04	0	0	0.07	0.03	0.11	0.14	0.13	0.04	0.06	0.15	0.06	0.12	0.16	0	0	0	0.06	0.06	0.03	0.08	0	0	0	0	0.04	0	0	0.21	0.16	0.09	0.02	0.08	0.02	0	0.08
XLOC_002214	0.05	0.09	0.03	0	0.05	0.1	0.07	0.05	0.16	0.32	0.28	0.16	0.14	0.37	0.05	0.09	0.13	0.14	0.16	0.05	0.02	0.33	0.07	0.19	0.16	0.11	0.18	0.24	0.09	0.21	0	0.12	0.2	0.1	0.17	0.14	0.16	0.13	0.18	0.22	0.16	0.08	0.12	0.06	0	0.03	0.19	0.09	0.14
XLOC_002217	0	0.1	0.05	0.23	0	0	0	0.13	0.3	0.04	0.15	0	0	0	0.08	0	0.1	0.5	0.51	0.14	0.07	0.61	0	0.18	0.12	0.08	0.24	0.04	0	0.21	0.04	0.09	0.1	0.21	0	0	0	0.07	0	0	0.55	0.16	0.56	0.11	0.09	0	0.73	0.24	0
XLOC_002219	0	0.12	0.06	0.07	0.17	0.04	0.08	0.12	0.05	0	0.18	0.28	0.05	0.2	0.15	0.1	0.35	0.2	0.09	0.3	0.2	0.05	0	0.04	0.17	0.05	0.12	0.07	0.03	0.08	0.05	0.13	0.1	0.07	0.25	0.04	0.38	0.46	0.1	0.5	0.12	0.17	0.42	0.47	0.13	0.34	0.12	0.21	0.05
XLOC_002221	0.02	0	0	0	0	0.02	0.02	0	0.12	0.16	0.48	0.28	0.72	0.47	0.72	0.42	0.02	0	0.02	0	0.02	0	0	0.05	0.01	0.01	0.18	0.07	0.11	0	0	0	0.08	0.03	0.28	0.04	0.05	0.13	0.42	0.22	0	0	0.04	0	0	0	0.01	0	0
XLOC_002225	3.35	0.59	0.51	0.69	1.02	0.31	0.44	0.38	4.43	0.82	0.28	0.38	0.26	0.12	0.44	0.22	0.81	2.55	0.49	0.82	0.97	0.99	1.11	0.95	2.6	0.74	0.51	0.71	0.99	0.79	0.48	0.33	2.18	0.67	0.67	0.46	0.78	0.86	0.46	0.61	0.73	0.33	0.16	0.21	0.32	0.3	0.24	0.19	2.09
XLOC_002229	0	0	0	0.03	0	0	0	0	0.01	0	0.03	0.04	0	0	0.03	0.01	0.16	0.15	0.04	0.06	0	0.05	0.05	0.02	0.04	0.1	0.04	0.07	0	0.02	0.05	0.04	0.1	0.12	0.04	0	0.02	0.06	0.05	0.02	0.12	0.07	0	0	0.06	0.02	0.23	0	0
XLOC_002231	0	0.04	0.05	0.11	0.13	0.12	0.04	0.01	0.04	0.05	0.06	0.04	0	0.02	0.17	0	0	0.01	0.01	0	0.03	0	0	0.05	0.07	0.02	0.1	0.04	0	0.04	0	0.01	0.04	0	0	0.03	0	0.11	0	0	0.01	0	0	0.12	0	0	0.01	0.01	0
XLOC_002234	0.14	0.03	0.11	0.05	0.06	0.09	0.05	0.05	0.05	0.02	0.25	0.02	0	0	0.01	0.03	0.61	0.18	0.28	0.15	0.09	0.05	0.05	0.16	0.21	0.29	0.09	0.12	0.17	0.26	0.09	0.16	0.16	0.52	0.07	0.09	0	0.21	0.11	0.03	0.12	0.21	0.23	0.25	0.04	0.14	0.04	0.15	0.19
XLOC_002240	0	0.02	0.02	0.07	0.24	0.03	0	0	0.11	0	0.02	0.15	0	0.14	0.19	0.3	0.09	0.12	0	0	0.08	0.22	0.34	0.16	0.02	0	0	0.06	0.46	0.02	0.21	0.41	0.04	0.2	0.17	0	0.05	0.06	0.07	0.21	0	0	0.14	0	0.05	0.04	0.12	0.06	0.07
XLOC_002243	3.43	2.65	3.24	2.2	2.47	3.07	2.48	2.19	0.18	0.11	0.24	0.16	0.15	0.12	0.14	0.23	0.15	0.05	0.4	0.21	0.03	0.41	0.27	0.08	0.24	0.2	0.21	0.25	0.27	0.13	0.15	0.34	0.95	0.36	0.97	0.45	0.29	0.51	0.28	0.38	0.22	0.23	0.05	0.11	0.71	0.2	0.29	0.17	0.55
XLOC_002245	0.08	0.06	0	0	0	0.14	0.07	0.07	0	0.13	0.04	0	0.09	0	0.09	0	0.35	0.57	0.25	0.32	0.22	0.5	0.26	0.07	0.23	0.54	0.5	0.21	0.66	0.73	0	0	0.35	0.18	0.08	0	0	0.42	0.57	0.09	0.31	0.27	0.14	0.29	0.29	0.1	0.72	0.55	0.28
XLOC_002247	0.08	0	0.03	0	0	0.03	0	0.18	0.02	0.27	0.04	0.06	0.02	0.14	0.09	0	0.69	0.5	0.98	0.78	0.47	0.44	0.45	0.72	0.68	0.88	0.7	0.5	0.43	0.26	0.5	0.1	0.67	0.3	0.15	0	0.14	0.21	0	0.09	2.3	1.56	1.4	0.53	0.86	1.09	1.06	1.5	1.18
XLOC_002251	0	0	0	0	0	0	0	0.07	0.38	0.66	1.07	0.66	0.44	0.43	0.25	0.47	1.88	1.97	2.21	1.54	2.02	1.62	2	1.52	1.45	1.67	1.02	0.53	0.43	1.09	1.96	1.47	1.08	1.53	0.98	1.54	0.87	1.26	0.7	0.32	0.42	1	0.57	0.9	0.12	0.05	0.49	0.3	1.37
XLOC_002255	0.02	0.01	0.08	0.02	0	0.05	0.03	0.02	0.1	0.26	0.19	0.12	0.1	0.12	0.24	0.14	0.02	0.1	0.35	0.12	0.23	0.14	0.23	0.18	0.05	0.09	0.37	0.18	0.2	0.03	0.22	0.26	0.12	0.08	0.13	0.08	0.11	0.08	0.09	0.09	0.16	0.11	0.3	0.09	0.15	0.06	0.17	0.04	0.07
XLOC_002257	0.83	1.48	0.92	0.79	1.76	0.58	2.03	0.99	0.23	0.19	0.08	0.1	0.09	0.07	0.12	0.07	0.05	0.17	0.06	0.06	0.26	0.27	0.23	0.16	0.05	0	0.11	0.15	0.12	0.25	0.22	0.06	0	0.05	0.12	0.38	0	0.1	0.11	0.14	0.11	0	0.22	0.18	0.08	0.12	0.22	0.11	0.11
XLOC_002263	0.04	0.01	0.05	0.04	0.08	0.01	0	0.02	0.33	0.45	0.86	0.16	0.03	0.03	0.03	0.04	0.15	0.12	0.62	1.07	0.77	1.22	1.81	1.84	0.27	0.11	0.35	0.91	1.21	1.02	1.3	1.42	0.97	1.11	0.94	1.17	0.27	0.95	0.55	0.34	0.16	0.19	0.62	1.35	0.79	1.36	1.05	1.16	0.12
XLOC_002267	0.07	0	0	0	0	0	0	0	0	0	0	0.04	0.12	0	0	0	0	0	0	0	0.13	0	0	0	0	0	0.04	0.07	0	0	0.77	0	0	0	0	0	0	0	0	0	0	0.12	0	0	0	0.65	0	0	0
XLOC_002270	0.28	0.33	0.1	0.38	0.14	0.48	0.09	0.3	0.06	0.04	0.16	0.07	0.52	0.14	0.19	0.14	0.07	0.11	0.03	0	0.59	0	0.08	0.29	0.04	0.11	0.06	0.18	0.11	0.02	0.02	0.25	0.07	0.15	0.13	0.1	0.8	0	0.32	0.12	0.09	0.11	0.1	0.07	0.55	0.19	0.12	0.14	0.04
XLOC_002274	0	0	0	0	0.05	0	0	0	0	0	0	0	0	0.16	0	0.06	0	0	0.11	0	0	0.2	0.04	0	0.06	0	0	0	0	0	0	0.48	0	0	0	0	0	0	0.13	0	0	0	0	0	0	0	0	0	0
XLOC_002278	0	0	0	0	0	0.12	0.13	0.03	0.14	0.24	0.04	0.02	0.15	0.27	0.06	0.16	0.2	0.16	0.14	0	0.13	0.67	0.19	0.33	0.08	0.49	0.19	0.29	0	0.17	0.24	0.11	0.08	0.03	0	0	0.03	0	0.24	0	0.17	0.06	0	0.16	0.04	0.23	0	0.07	0.04
XLOC_002279	0.02	0.03	0.1	0.03	0.15	0.07	0.11	0.09	0.25	0.15	0.11	0.18	0.13	0.15	0.12	0.06	0.37	0.3	0.17	0.2	0.31	0.23	0.26	0.21	0.39	0.65	0.22	0.33	0.36	0.29	0.09	0.16	0.48	0.39	0.02	0.1	0.04	0.18	0.24	0.02	0.25	0.45	0.05	0.2	0.14	0.33	0.07	0.2	0.29
XLOC_002281	0	0.02	0.04	0.01	0	0.01	0.01	0	0.02	0.03	0.11	0.01	0	0.01	0.04	0.03	0.31	0.3	0.07	0.23	0.08	0.07	0.02	0.02	0.19	0.31	0.02	0.19	0	0.01	0	0	0.51	0.5	0.11	0.2	0	0.13	0	0.02	0.49	0.3	0.05	0.12	0	0.02	0	0	0.57
XLOC_002282	0.03	0.02	0.06	0.01	0.09	0.02	0.01	0.01	1.51	1.6	1.87	1.38	1.15	0.86	1.1	0.84	1.39	2.14	1.64	1.91	1.9	1.23	1.77	1.26	2.2	2.13	1.66	1.81	2.07	1.34	1.5	1.33	1.65	1.42	1.45	1.23	1.29	1.07	1.45	1.39	2.8	2.37	1.59	1.25	1.48	0.78	1.36	1.14	1.76
XLOC_002283	0	0	0	0	0	0	0	0	0	0	0.04	0	0	0	0	0	0.46	0.74	0.62	0.14	0.35	0.2	0.07	0.06	0.68	0.82	0.08	0.4	0.1	0.12	0.04	0.02	0.19	0.37	0.03	0.09	0	0.04	0	0	0.36	0.29	0.18	0.22	0.13	0.04	0	0.09	0.67
XLOC_002284	0.04	0.02	0.03	0.04	0.08	0.02	0.04	0	0.04	0.02	0.12	0.01	0.01	0.01	0	0	0.28	0.25	0.25	0.26	0.4	0.18	0.18	0.15	0.24	0.28	0.19	0.15	0.12	0.23	0.06	0.12	0.26	0.28	0.07	0.01	0.02	0	0	0.03	0.92	0.81	0.17	0.32	0.33	0.19	0.31	0.21	0.4
XLOC_002285	0.01	0	0	0	0.01	0	0	0	0.05	0.01	0.21	0.01	0.01	0	0	0	6.87	9.17	11.03	8.36	7.66	4.66	4.52	3.9	5.24	3.84	5.69	6.18	4.11	3.17	3.05	3.99	2.75	2.46	0.61	0.13	0.01	0.47	0.39	0.03	12.01	12.8	6.78	5.06	5.14	3.77	2.77	3.74	9.6
XLOC_002286	0	0	0	0.01	0	0	0	0	0.09	0.04	0.1	0.01	0.01	0	0	0	2.1	2.73	1.29	1.37	1.5	0.53	0.64	0.72	2.44	2.12	1.26	1.09	0.84	0.46	0.68	0.87	1.52	1.4	0.13	0.05	0	0.08	0.1	0	4.27	4.39	1.58	1.38	1.56	0.65	0.78	0.77	2.72
XLOC_002288	0.78	0.45	0	0.48	0.27	0.24	0.26	0.1	0.42	0.61	0.55	0.56	0.3	0.25	0.43	0.39	0.55	0.73	1.4	0.43	0.55	0.34	0.84	0.38	0.34	0.46	1.47	1.01	0.07	0.1	0.92	0.48	1.04	0.62	1.04	0.38	0.1	0.29	0.84	0.94	0.55	0.52	0.96	0.81	0.49	0.17	0.15	0.08	0.69
XLOC_002289	0.15	0.32	0.09	0.22	0.12	0.09	0.23	0.11	0.44	0.72	0.44	0.32	0.24	0.18	0.29	0.27	0.73	0.4	0.55	0.39	0.5	0.03	0.42	0.36	0.49	1.27	0.24	0.14	0.28	0.21	0.64	0.76	0.67	1.14	0.21	0.27	0.11	0.33	0.55	0.39	0.58	0.48	0.57	0.78	0.34	0.18	0.54	0.39	0.95
XLOC_002290	0.19	0.05	0.14	0.14	0.05	0	0.12	0.18	0.23	0.02	0.17	0.1	0.11	0.01	0.17	0.16	0.21	0.38	0.53	0.23	0.32	0.08	0.14	0.37	0.38	0.24	0.77	0.35	0.63	0.1	0.12	0.64	0.49	0.22	0.16	0.06	0.03	0	0.11	0.18	0.44	0.33	0.31	0.58	0.54	0.06	0.27	0.34	0.45
XLOC_002291	0.02	0.04	0.09	0.03	0.04	0.12	0.03	0.16	0.06	0.13	0.27	0.13	0.14	0.14	0.34	0.32	0.15	0.11	0.15	0.18	0.18	0.3	0.28	0.33	0.07	0.05	0.29	0.08	0.11	0.33	0.33	0.22	0.29	0.29	0.98	0.34	0.49	1	0.79	0.91	0.15	0.28	0.33	0.32	0.25	0.26	0.5	0.41	0.13
XLOC_002292	0	0	0.03	0	0	0	0	0	0.07	0.04	0.03	0	0	0	0	0	0.19	0.22	0	0.13	0.17	0.23	0.11	0.1	0.09	0.26	0.11	0.01	0.02	0.06	0.1	0.01	0.42	0.09	0.04	0	0	0.06	0.04	0	0.22	0.46	0.01	0.08	0.24	0.08	0.12	0.16	0.17
XLOC_002293	0.16	0	0.04	0.06	0.01	0.01	0.02	0.05	7.3	4.32	4.1	6.6	5.39	7.54	6.88	6.48	2.48	6.12	4.7	4.39	3.55	3.91	4.7	4.72	5.46	2.77	4.78	4.34	3.81	3.98	5.65	4.52	4.96	2.59	5.18	5.45	9.9	7.21	8.76	8.83	5	1.87	2.3	1.55	2.41	2.54	3.05	2.58	5.85
XLOC_002296	0.8	0.7	0.37	1.01	0.84	0.81	0.71	0.83	0.1	0.05	0.1	0.02	0.04	0	0.03	0.03	0.2	0.14	0.08	0.17	0.11	0.17	0.11	0.04	0.1	0.15	0.09	0.06	0.15	0.06	0.01	0.22	0.15	0.13	0.1	0.02	0.11	0.24	0.05	0.05	0.17	0.09	0.28	0.3	0.23	0.09	0.04	0.19	0.33
XLOC_002298	0.05	0.07	0.19	0.29	0.57	0.23	0.98	0.14	0	0.11	0	0	0	0	0	0	0.04	0.08	0	0.16	0.72	0.26	0.04	0.05	0.03	0.03	0.09	0.06	0.3	0.03	0	0	0.04	0	0	0	0.05	0	0.06	0	0	0.17	0	0.16	0.03	0	0.11	0.07	0
XLOC_002299	1.02	0.56	0.55	1.06	0.88	1.1	1.17	0.62	0	0	0	0	0	0	0	0.07	0	0	0.45	0.19	0.23	0.23	0.15	0.27	0.07	0.14	0.39	0.07	0.16	0.11	0.03	0.39	0	0.42	0.12	0.12	0	0	0	0	0	0	0.79	0	0.11	0.19	0	0.13	0.07
XLOC_002308	0	0	0	0	0	0	0	0.04	0	0.09	0.02	0	0.02	0.02	0.44	0.05	0	0	0	0	0	0	0.1	0	0	0	0	0	0	0.2	0	0	0.03	0.09	0.58	0.36	0.11	0.26	0.19	0.23	0.14	0	0	0.25	0	0.02	0.2	0.08	0
XLOC_002312	0	0	0.07	0.04	0	0	0	0	0.05	0	0	0	0	0	0	0.03	0.03	0.04	0.09	0.09	0.08	0	0.15	0.08	0.05	0.05	0	0.02	0	0	0	0	0.07	0.07	0	0	0	0.05	0	0	0.03	0.66	0.08	0.19	0.25	0.06	0.13	0	0.1
XLOC_002314	0	0	0	0	0	0	0.05	0	0	0	0.03	0	0	0	0	0	0	0.24	0	0	0	0	0.21	0.04	0	0.14	0.03	0.14	0.46	0	0	0.22	0	0	0	0	0	0	0	0	0	0	0.09	0.61	0.28	0.6	0	0.18	0
XLOC_002318	0.27	0.13	0.22	0.73	0	0.17	0.32	0.37	0.83	0.36	0.54	0.34	0.58	0.69	1.17	1.09	1.31	0.44	0.81	0.9	0.66	0.42	0.94	0.79	0.58	0.76	0.49	0.58	0.62	0.85	1.19	0.75	1.08	0.99	0.43	1.2	0.69	0.2	0.36	0.26	1.03	0.94	0.99	0.6	0.68	0.12	1.27	0.42	0.73
XLOC_002321	0.21	0.08	0.21	0.13	0.12	0.34	0.04	0.24	0.11	0.2	0.35	0.36	0.15	0.12	0.18	0.29	0.19	0.19	0.06	0.12	0.38	0.08	0.22	0.29	0.18	0.22	0.06	0.3	0.3	0.12	0.04	0.18	0.02	0.11	0.37	0.2	0.14	0.65	0.17	0.33	0.06	0.23	0.09	0.34	0.11	0.04	0.13	0.23	0.12
XLOC_002322	0.02	0.01	0.02	0.03	0.04	0.03	0.01	0.01	0	0.01	0.04	0.04	0.01	0.02	0.01	0.02	0.01	0.03	0.31	0.25	0.07	0.5	0.48	0.21	0.02	0.05	1.61	0.79	0.6	0.98	1.43	1.53	0.08	0	0.16	0.03	0.01	0.07	0.08	0.08	0.33	0.36	1.97	1.63	0.96	1.84	1.8	2.41	0.1
XLOC_002324	0.15	0.23	0	0.09	0.04	0	0	0.13	0.13	0.02	0	0	0	0	0	0.02	0.03	0	0.08	0	0	0.09	0	0	0	0	0	0	0	0	0	0	0	0.06	0	0	0	0	0	0	0	0	0.04	0.02	0	0	0	0.03	0.04
XLOC_002325	0.07	0	0.01	0	0.19	0.02	0.07	0.02	0.15	0.16	0.58	0.28	0.27	0.4	0.53	0.34	0.18	0.36	0.22	0.48	0.13	0.21	0.14	0.21	0.24	0.29	0.14	0.17	0.19	0.25	0.1	0.16	0.2	0.14	0.88	0.53	0.64	0.64	0.75	0.9	0.04	0.06	0.04	0.05	0.08	0.11	0.21	0.08	0.43
XLOC_002331	0	0.05	0.03	0.08	0.03	0.09	0	0	0.06	0.07	0.16	0.17	0	0.14	0.06	0.16	0.1	0	0.07	0	0	0	0.25	0	0	0.02	0.1	0.02	0.07	0.08	0.08	0	0	0.05	0	0	0	0	0.24	0.16	0.02	0.02	0	0.11	0	0.27	0.14	0.29	0
XLOC_002338	0.07	0	0	0.06	0	0	0	0.22	0.12	0	0	0.02	0.08	0.02	0	0.28	0.05	0.05	0	0.1	0	0	0.06	0.03	0	0	0	0	0	0	0.28	0.04	0.05	0	0.07	0.07	0	0	0.08	0.04	0	0.1	0	0	0	0.06	0.05	0.36	0.04
XLOC_002343	0	0.05	0	0.12	0	0	0	0	0	0	0	0	0.13	0	0	0	0	0	0	0.08	0	0	0	0	0	0	0	0.04	0	0	0	0	0	0	0	0.08	0.8	0	0	0	0.04	0	0	0	0	0	0.05	0	0
XLOC_002344	0	0	0	0	0	0	0	0	0.05	0.02	0.02	0	0.13	0	0.35	0.16	0	0	0	0	0	0	0	0	0	0	0	0	0	0	0	0	0	0.03	0.29	0.35	0.03	0.04	0.09	0.18	0	0	0	0	0	0	0	0	0
XLOC_002345	0.12	0.07	0.07	0.09	0.05	0.01	0	0.17	0.86	1	0.61	0.99	3.01	2.96	2.62	1.56	0.2	0.37	0.22	0.22	0.15	0.18	0.08	0.3	0.2	0.21	0.21	0.45	0.12	0.19	0	0.23	0.5	1.17	2.25	1.46	3.04	5.66	2.69	4.51	0.19	0.05	0.09	0.11	0.19	0.25	0.1	0.09	0.13
XLOC_002346	0.15	0.29	0.14	0.41	0.25	0.28	0.48	0.22	0.43	0.26	0.3	0.18	0.3	0.1	0.33	0.26	0.25	0.27	0.35	0.12	0.32	0.06	0.48	0.36	0.17	0.4	0.08	0.1	0.3	0.09	0.38	0.06	0.31	0.2	0.4	0.54	0.67	0.72	0.14	0.08	0.26	0.33	0.28	0.13	0.19	0.48	0.56	0.2	0.45
XLOC_002354	0	0.04	0.01	0	0.02	0	0	0.03	0	0.12	0.24	0.02	0.06	0.03	0.02	0.04	0.2	0.03	0.09	0	0.12	0	0.03	0	0.06	0.36	0.01	0.03	0	0.08	0.04	0	0	0.15	0.09	0	0	0	0.21	0.04	0	0.05	0.21	0	0	0.03	0.04	0.05	0
XLOC_002358	0	0	0.04	0.14	0	0.04	0	0.07	0.03	0.05	0.23	0.03	0.03	0.01	0	0.04	0.81	1.98	0	0	0	0.13	0	0	0.46	0.17	0.01	0.01	0.05	0	0.03	0	0.52	0.29	0.05	0.18	0.2	0.05	0.33	0.06	0.04	0	0	0.05	0.06	0.02	0.09	0.02	0.82
XLOC_002359	0	0	0	0	0	0	0	0	0.14	0.08	0.05	0	0.03	0	0	0	0.18	0.53	0	0	0.04	0	0	0	0.17	0.11	0	0	0.06	0	0	0	0.18	0.07	0	0	0.08	0	0.29	0	0	0	0	0	0	0	0	0	0.17
XLOC_002365	0	0	0	0	0.02	0	0	0	0.03	0.03	0.07	0.09	0.18	0	0.14	0.03	0	0	0	0	0	0	0	0.02	0.09	0	0	0.05	0	0	0	0	0.07	0	0.19	0	0	0.03	0.06	0.06	0	0	0	0	0	0	0	0.07	0
XLOC_002366	0.06	0.04	0	0	0	0.1	0	0.05	0.72	1	0.82	0.68	0.88	1.27	0.31	0.52	0.12	0.35	0.4	0.22	0.36	0.48	0.27	0.29	0.09	0.31	0.13	0.26	0.07	0.74	0.42	0	0.69	0.83	0.73	0.38	0.34	0.41	0.97	0.44	0.12	0.06	0.06	0.31	0.33	0.3	0	0	0.06
XLOC_002367	0	0	0	0.04	0	0	0	0	0.18	0	0.2	0.03	0.08	0.24	0.36	0.29	0	0.04	0.03	0	0	0	0.02	0.02	0	0	0	0	0	0	0	0	0	0	0	0	0	0	0.09	0.45	0	0	0	0	0	0	0	0	0
XLOC_002368	0	0.03	0.27	0	0.08	0.07	0.08	0	0	0	0.15	0	0	0.05	0	0.05	0	0.2	0.04	0.25	0.11	0.05	0	0.25	0.09	0	0	0.04	0.08	0.23	0	0	0	0	0	0	0	0.13	0	0	0.05	0.25	0.14	0.19	0.13	0.13	0.49	0.97	0.19
XLOC_002370	0.47	0.35	0.14	0.36	0.32	0.47	0.32	0.36	0.08	0.14	0.1	0.13	0.08	0.09	0.07	0.27	0.08	0.23	0.28	0.27	0.1	0.21	0.22	0.09	0.23	0.07	0.02	0.12	0.1	0.15	0.06	0.12	0.02	0.04	0.08	0.24	0.15	0.15	0.18	0.29	0.06	0.1	0.14	0.21	0.13	0.19	0.19	0.1	0.08
XLOC_002373	0	0	0	0	0	0	0	0	0.21	0.46	0.05	0.09	0.15	0.2	0.06	0.14	0.28	0.08	0	0.17	0.16	0	0.2	0.33	0.16	0	0.08	0.04	0.09	0.02	0	0	0.31	0.44	0	0.07	0.39	0.04	0.08	0	0.04	0.08	0.08	0.14	0.13	0	0.02	0	0.16
XLOC_002374	0.29	0.48	0.23	0.27	0.16	0.11	0.24	0.23	0.56	0.99	0.4	0.51	0.32	0.34	0.26	0.48	0.19	0.1	0.27	0.57	0.36	0.23	0.25	0.32	0.36	0.31	0.33	0.22	0.07	0.44	0.14	0.23	0.31	0.31	0.3	0.6	0.25	0.27	0.15	0.33	0.19	0.26	0.27	0.58	0.74	0.48	0.32	0.45	0.39
XLOC_002376	0.32	0.22	0.21	0.11	0.11	0.01	0.06	0.08	0.06	0	0.11	0.08	0.03	0.02	0.19	0.02	0.48	0.48	0.5	0.33	0.39	0.25	0.34	0.37	0.27	0.3	0.21	0.26	0	0.12	0.13	0.07	0.03	0.04	0.12	0.03	0.05	0.26	0.06	0.04	0.54	0.32	0.24	0.02	0.23	0.15	0.09	0.43	0.16
XLOC_002381	0.46	0.59	0.69	0.88	0.4	0.59	0.38	0.56	0.23	0.12	0.17	0.1	0.38	0.39	0.3	0.33	0.45	0.29	0.4	0.23	0.49	0.27	0.37	0.35	0.2	0.39	0.27	0.04	0.1	0.2	0.19	0.2	0.46	0.3	0.16	0.25	0.19	0.3	0.31	0.17	0.41	0.56	0.29	0.19	0.26	0.18	0.7	0.47	0.33
XLOC_002382	0.03	0	0	0	0	0	0	0	0.37	0.12	0.03	0	0.05	0	0	0.11	0.08	0.04	0	0	0	0.03	0	0.02	0	0	0	0	0	0	0	0	0.04	0.04	0	0.14	0	0	0	0	0.02	0	0.02	0	0	0	0	0	0
XLOC_002383	0.27	0.44	0.54	0.4	0.37	0.32	0.16	0.66	0	0.05	0	0.11	0.18	0.04	0.21	0.12	0.41	0.24	0	0.3	0.19	0.21	0.11	0.06	0.21	0	0.04	0.02	0.04	0.08	0.22	0.23	0	0	0.25	0.07	0.09	0.14	0.24	0.38	0.41	0.11	0.27	0.34	0.26	0	0.19	0.32	0.19
XLOC_002388	0.2	0.18	0.03	0.14	0.17	0.06	0.08	0.04	0.39	0.57	0.25	0.47	0.31	0.3	0.51	0.51	0.96	0.73	0.74	0.75	1.32	1.61	1.28	1.17	0.99	0.4	0.92	0.68	0.67	0.94	1.07	0.83	0.56	0.77	0.66	0.48	0.3	0.69	0.77	0.27	0.41	0.39	0.37	0.36	0.47	0.48	0.64	1.17	0.5
XLOC_002391	0	0	0	0	0	0.24	0	0.06	0	0	0	0	0	0.12	0	0	0.35	0	0.07	0.34	0	0.34	0.16	0.06	0.08	0.11	0.04	0.11	0.04	0.17	0	0.3	0	0.1	0	0	0	0	0	0	0.15	0.64	0.04	0.07	0.2	0.17	0.14	0	0.78
XLOC_002394	0.23	0.59	0.13	0.2	0.23	0.42	0.52	0.27	0.14	0.27	0.12	0.05	0.08	0.25	0.1	0.03	0.24	0	0.13	0.2	0.16	0.5	0.16	0.15	0.04	0.07	0.09	0.16	0.02	0.2	0.05	0.09	0	0.11	0	0.05	0	0.26	0.06	0.32	0.16	0.21	0.2	0.32	0.21	0.37	0.02	0.16	0
XLOC_002395	0.08	0.28	0.01	0	0.02	0.09	0.04	0.05	0.2	0.24	0.27	0.18	0.27	0.38	0.23	0.4	0.35	0.36	0.21	0.34	0.58	0.32	0.31	0.39	0.29	0.39	0.19	0.32	0.34	0.53	0.37	0.38	0.5	0.28	0.61	0.57	1.04	0.89	0.64	0.67	0.59	0.5	0.66	0.8	1.03	0.63	0.51	0.66	0.43
XLOC_002396	0	0	0	0	0	0	0	0.09	0	0.03	0.13	0.11	0	0.08	0.06	0.03	0.54	0.31	0.35	0.15	0.18	0.18	0.64	0.21	0.48	0.55	0.06	0.1	0	0	0.24	0.28	0	0.56	0.09	0	0.04	0	0.17	0.11	0	0.08	0.25	0.2	0.12	0.06	0.44	0.24	0.06
XLOC_002398	0	0.12	0.13	0	0	0	0	0.91	0	0.13	0.13	0	0	0	0	0.14	0.04	0	0	0.18	0.11	0.22	0	0	0	0	0.14	0	0	0.14	0	0.44	0	0.13	0	0	0	0	0	0.61	0	0	0.1	0.12	0.07	0.04	0.08	0.37	0.07
XLOC_002399	0	0	0.03	0	0	0	0	0	0	0	0.16	0.07	0	0.05	0	0	0	0	0.22	0.17	0	0	0.24	0.04	0	0	0.54	0.02	0.11	0.29	0.12	0.03	0	0	0	0.04	0	0	0	0.2	0	0	0.44	0	0	0	0	0	0
XLOC_002411	0	0	0	0	0	0.03	0	0.03	0.07	0	0.11	0	0	0	0	0	2.53	2.71	0.15	0.6	0.13	0.29	0.05	0.03	3	9.16	0.76	1.72	0.35	0.14	0.24	0.18	0.04	0.74	0.05	0	0	0	0	0	1.21	0.21	0.67	0.16	1.28	0.9	0.64	0.34	1.82
XLOC_002413	0.01	0.12	0.08	0.13	0.09	0.04	0.03	0.02	0.14	0.14	0.19	0.19	0.15	0.24	0.14	0.22	0.27	0.13	0.18	0.14	0.08	0.1	0.05	0.12	0.17	0.65	0.14	0.07	0.05	0.22	0.16	0.07	0.64	0.59	0.14	0.12	0.01	0.09	0.08	0.02	0.67	1.21	0.63	0.17	0.27	0.38	0.43	0.36	0.31
XLOC_002415	0	0	0	0	0	0	0	0	0.37	0.23	0.14	0.48	0.58	0.13	0.11	0.02	0.03	0.09	0.12	0.12	0.25	0	0.09	0.07	0.09	0	0.09	0.12	0	0	0	0.17	0.09	0.09	0	0	0.1	0	0.37	0.09	0.13	0.56	0	0.14	0.09	0	0.03	0.16	0.04
XLOC_002416	0	0	0	0	0	0	0	0	0.11	0.04	0.06	0.08	0.2	0.19	0.06	0.11	0.03	0.06	0.15	0.11	0	0.18	0.03	0.16	0.08	0	0	0	0	0.02	0	0.09	0	0	0	0	0.2	0	0	0	0.4	0.15	0.13	0.21	0.09	0.02	0	0	0
XLOC_002419	0	0	0.04	0	0	0	0	0	0.03	0.1	0.13	0.05	0	0.06	0.03	0.17	0	0	0	0	0.22	0.24	0	0.08	0	0.13	0.08	0.1	0	0.12	0	0.09	0.21	0	0.05	0	0.17	0	0	0	0.08	0.16	0	0	0	0	0	0.2	0.11
XLOC_002421	0.31	0.25	0.48	0.05	0	0.05	0.06	0.05	0.61	0.29	0.89	0.97	0.83	0.48	0.47	0.6	0.7	0.57	0.62	0.54	1	0.37	0.24	0.26	0.55	0.91	0.86	0.48	1.3	0.58	0.07	0.79	0.09	0.18	0.57	0.18	0.47	0	0.57	0.07	0	0.23	0.07	0.46	0.4	0.04	0.08	0.25	1.1
XLOC_002423	1.43	2.41	1.2	2.28	1.48	0.92	0.98	1.86	0.35	0.6	0.29	0.73	0.47	0.81	0.79	0.25	0.08	0.18	0.36	0.19	0.11	0.29	0.13	0.17	0.6	0.35	0.13	0.21	0	0.8	1.32	0.36	0.23	0.91	0.44	0.39	0.07	1.07	0.32	0.27	0.11	0.37	0.07	0.14	0.54	0.48	0.08	0.43	0.31
XLOC_002426	0	0	0.05	0	0	0	0	0	0	0.03	0	0	0.04	0.07	0.07	0.08	0	0.05	0.07	0	0	0	0	0.11	0	0	0	0	0.33	0.12	0	0.08	0.29	0	0	0	0.11	0	0.15	0	0	0.04	0	0.1	0.27	0	0.45	0.13	0
XLOC_002427	0.04	0	0	0.03	0	0.03	0	0	0.04	0.12	0.28	0.26	0	0.02	0.08	0	0	0	0.08	0.07	0	0	0	0.03	0	0	0.09	0	0	0.02	0	0	0.03	0.03	0.07	0.45	0.36	0.52	0.04	0.13	0	0	0.09	0	0	0	0.05	0	0.13
XLOC_002428	0.06	0.07	0.28	0.06	0.12	0.37	0.11	0.34	0.3	0.28	0.24	0.19	0.18	0.21	0.31	0.24	0.09	0.11	0.17	0	0.09	0.02	0	0.1	0.06	0.1	0.22	0	0	0.06	0	0.01	0.06	0.21	0.19	0.12	0.21	0.44	0.19	0.14	0.12	0.02	0.08	0.09	0.1	0.1	0.04	0.04	0.07
XLOC_002431	0	0	0	0	0	0	0	0	0.06	0.03	0.01	0.09	0	0.23	0.44	0.31	0	0.02	0	0	0	0	0.02	0	0	0	0.04	0.03	0.05	0	0	0	0.02	0	0	0	0	0	0.03	0.06	0	0	0	0	0	0	0	0	0
XLOC_002432	0	0	0.09	0	0	0	0.12	0	0	0	0.1	0.37	0.07	0	0	0.04	0	0	0	0	0	0	0	0	0	0.28	0.07	0	0	0.04	0.14	0	0.05	0	0	0	0.22	0	0	0	0	0.14	0	0	0.08	0.04	0.17	0	0.14
XLOC_002433	0.06	0	0	0	0	0	0	0	0.22	0.09	0.03	0.14	0.11	0.11	0.11	0.05	0.12	0.47	0.12	0.2	0.29	0.07	0.11	0.12	0.08	0.02	0.11	0.08	0.16	0.07	0.02	0.05	0.1	0.21	0	0.06	0.05	0.18	0	0	0.72	0.11	0.23	0.26	0.12	0.02	0.63	0.22	0.26
XLOC_002434	0	0.06	0	0	0	0	0.04	0	0.24	0.16	0.3	0.02	0	0.03	0.12	0.03	0.45	0.79	1.13	0.09	0.32	0.22	0.46	0.46	0.85	0.61	0.6	0.09	0.25	0.59	1	0.03	0.39	0.73	0.21	0	0.04	0.32	0.05	0.1	0.29	0.22	0.27	0.11	0.26	0.24	0.27	0.18	0.45
XLOC_002440	0	0	0.45	0.09	0.06	0.05	0	0	0.1	0	0.06	0.03	0.06	0	0	0	0	0	0	0.11	0	0	0	0.05	0.13	0.38	0.19	0	0.07	0	0.12	0	0.42	0	0.11	0.06	0	0	0	0.06	0	0	0	0	0	0	0	0	0
XLOC_002444	0.08	0.03	0	0.59	0	0.23	0.11	0.05	0	0	0	0	0	0	0	0	0	0	0	0	0	0	0	0	0	0	0	0	0	0	0	0	0	0	0	0	0	0	0	0	0	0	0	0	0	0	0	0	0
XLOC_002445	0	0.22	0	1.59	0.02	0.17	0.09	0.04	0.03	0	0	0	0.05	0	0	0	0	0	0	0	0	0.06	0	0	0	0	0	0	0	0	0	0	0	0	0	0	0	0	0	0	0	0	0	0	0	0	0	0	0
XLOC_002446	0.35	0.48	0.48	0.72	0.67	0.46	0.71	0.37	0.11	0.05	0.02	0.11	0.28	0.11	0.17	0.32	0	0.01	0.01	0	0.02	0.08	0.03	0	0	0	0	0	0	0	0	0	0	0	0.07	0.18	0.06	0.04	0.05	0.03	0.01	0.05	0.02	0	0	0.03	0	0.02	0.03
XLOC_002448	0	0.04	0	0	0	0	0	0	0	0	0	0	0	0	0	0	0.15	0	0	0	0	0	0	0	0	0	0	0	0	0	0.42	0	0	0	0	0	0	0	0	0	0	0	0	0	0	0	0	0	0
XLOC_002452	0.54	0.61	0.16	0.39	0.93	2.14	0.66	0.2	0.05	0.05	0	0.17	0.02	0.1	0.12	0.03	0.03	0.07	0.05	0	0.04	0.05	0	0	0.2	0.1	0.18	0.07	0.06	0.03	0.05	0	0.07	0.1	0	0	0.23	0.19	0.16	0.25	0	0	0	0	0	0	0	0.09	0
XLOC_002453	0	0	0	0	0	0	0	0.27	0.04	0.05	0.06	0	0	0	0	0.04	0.15	0.24	0.09	0.21	0.19	0.22	0.17	0.18	0.29	0.02	0.05	0	0	0	0	0	0	0	0	0	0	0	0	0	0	0	0.02	0	0	0	0	0.02	0
XLOC_002454	0	0	0	0	0	0	0	0	0	0	0	0	0	0	0	0	0	0	0.16	0	0	0	0	0.14	0	0	0.09	0	0	0	0	0	0.12	0	0	0	0	0	0	0	0	0	0	0	0	0	0	0	0.18
XLOC_002456	0	0.03	0	0.03	0	0	0	0.04	0.1	0.01	0.09	0.1	0.05	0	0.08	0.07	0.21	0.18	0.48	0.23	0.17	0.03	0.24	0.17	0.04	0.05	0.17	0.07	0.03	0.1	0	0	0.14	0.19	0.1	0	0.17	0.04	0.1	0.1	0.08	0.12	0	0.06	0.13	0	0.09	0	0.44
XLOC_002457	0.37	0.3	0.28	0.23	0.43	0.42	0.3	0.61	0.25	0.25	0.55	0.14	0.17	0.17	0.34	0.24	0.15	0.15	0.44	0.14	0.25	0.17	0.3	0.28	0.08	0.21	0.16	0.24	0.32	0.12	0.26	0.49	0.31	0.22	0.73	0.29	0.53	0.48	0.58	0.35	0.05	0.07	0.67	0.32	0.43	0.57	0.67	0.73	0.07
XLOC_002458	0.16	0.13	0.13	0.06	0	0.22	0.16	0.05	0.04	0.04	0.08	0.05	0.06	0.38	0.13	0.04	0.02	0	0.03	0	0.03	0.35	0.12	0.1	0.06	0	0	0.09	0.18	0.15	0.06	0.18	0.06	0.03	0.03	0.03	0.03	0.2	0.19	0.2	0.02	0.03	0.09	0.1	0.08	0.2	0.38	0.08	0
XLOC_002466	0.1	0.03	0.09	0.02	0	0	0.02	0.11	0.1	0.05	0.18	0.15	0.16	0.04	0.19	0.03	0	0.04	0	0	0	0	0	0	0	0.08	0.01	0.05	0	0	0.07	0.25	0	0.15	0.19	0.05	0	0.05	0.09	0.06	0.01	0.04	0	0	0.18	0	0	0	0.11
XLOC_002467	0.42	0.05	0.2	0.17	0.21	0.78	0.13	0	0.2	0	0	0	0	0.16	0.19	0	0	0	0	0	0	0	0.11	0	0	0	0	0.04	0	0	0	0	0	0	0.2	0	0	0	0.08	0	0	0	0.16	0.04	0	0	0	0	0
XLOC_002468	0	0.02	0	0	0	0	0	0	0	0	0	0	0	0	0	0	0	0	0.11	0.03	0	0.2	0	0	0.09	0	0.16	0	0.03	0.08	0	0	0	0.08	0.05	0	0.05	0	0	0	0	0.08	0	0.06	0.02	0.05	0.08	0.59	0
XLOC_002469	0	0.04	0	0.12	0	0.11	0.03	0	0	0	0	0.08	0	0.02	0	0	0.13	0	0.25	0.03	0.11	0.04	0.19	0.03	0.17	0.07	0.02	0	0	0.04	0	0.06	0	0.05	0	0	0	0.06	0	0	0	0	0.17	0.54	0.05	0.13	0.08	0.21	0
XLOC_002470	0.2	0.17	0.49	0.16	0.05	0.13	0	0.09	0.01	0.13	0.26	0.09	0.2	0.34	0.39	0.49	0	0	0.03	0	0.05	0.06	0.02	0.09	0	0	0.01	0.05	0.16	0.34	0.08	0.02	0.29	0.3	0.33	0.32	0.37	0.34	0.12	1.16	0	0.03	0	0.11	0.01	0.02	0	0.02	0
XLOC_002476	0	0	0	0	0.03	0.03	0.03	0.03	0	0	0.17	0	0	0.02	0	0.04	0.02	0.05	0.14	0	0.52	0	0.35	0.14	0.06	0	0.34	0	0.34	0	0	0.02	0.05	0	0.09	0.07	0	0	0	0	0	0	0.23	0.03	0.1	0.04	0	0	0.08
XLOC_002477	0	0	0	0	0	0	0.06	0	0.04	0.13	0.03	0	0.1	0.03	0	0.25	0	0.29	0.19	0.06	0.06	0.38	0.15	0.05	0.03	0	0.24	0	0.08	0.44	0	0	0.13	0	0.06	0	0.27	0.7	0.07	0.07	0	0	0	0.06	0.11	0.07	0	0.04	0.14
XLOC_002478	0	0	0	0	0	0	0	0	0.03	0.02	0	0.08	0.03	0	0.09	0	0	0	0	0.12	0	0	0.3	0	0.04	0	0	0.05	0	0	0.01	0	0	0	0	0.16	0	0.05	0.17	0	0	0	0	0.1	0	0	0.1	0	0
XLOC_002481	0.7	0.64	0.97	1.72	1.5	0.98	1.11	1.47	1.24	1.67	1.41	1.09	0.99	0.98	0.9	0.77	0.44	0.64	1.42	1.46	1.25	1.37	1.42	1.06	0.5	0.9	1.22	1.53	1.14	1.18	0.8	0.55	0.39	0.54	1.6	1.18	1.57	1.43	1.25	1.45	0.85	0.68	0.81	1.24	1.29	0.99	1.66	0.77	1.01
XLOC_002484	1.2	1.78	1.06	1.38	1.64	0.86	0.66	1	0.34	0.32	0.18	0.13	0.68	0.62	0.11	0.32	0.39	0.47	0.38	0.2	0.43	0.33	0.22	0.53	0.31	0.07	0.15	0.3	0.15	0.18	0.44	0.29	0.25	0.08	0.13	0.2	0.03	0.07	0.08	0.23	0.66	0.6	0.73	0.6	0.24	0.66	0.63	0.14	0.31
XLOC_002487	0	0	0.11	0	0.05	0	0	0.28	0.21	0.27	0.19	0	0.23	0.18	0	0.39	0.19	0.44	0	0	0	0	0.04	0	0.03	0	0.12	0	0	0	0	0.03	0.38	0.04	0.2	0.1	0.13	0.11	0.06	0.06	0	0	0	0.03	0	0	0	0	0
XLOC_002488	0	0.1	0	0.01	0.03	0	0.03	0.07	0.23	0.24	0.18	0.12	0.16	0.38	0.27	0.33	0.14	0.04	0.01	0	0	0.1	0.08	0.02	0.02	0.05	0.04	0	0	0.03	0.06	0	0.03	0.06	0.24	0.47	0.22	0.38	0.44	0.4	0.06	0.01	0	0.02	0	0	0	0	0.02
XLOC_002489	0	0	0.03	0	0	0	0	0	0	0	0	0.02	0	0	0.1	0.1	0	0	0	0	0	0	0	0.08	0	0	0	0.05	0	0	0	0.03	0	0	0.04	0	0	0	0	0.74	0	0	0	0	0	0	0.15	0.09	0
XLOC_002490	0	0	0.09	0	0	0	0	0.06	0	0.02	0	0.03	0	0.02	0.02	0.17	0	0	0	0	0	0	0	0.03	0.05	0	0	0	0	0	0	0.3	0	0	0.03	0	0	0.07	0	0.7	0	0	0	0	0	0	0	0.04	0
XLOC_002495	0.12	0.25	0.4	0.08	0.24	0.4	0.07	0.15	0	0.05	0.06	0	0.04	0.03	0	0	0.03	0	0.05	0.02	0.09	0.03	0.15	0.15	0	0	0.12	0	0.44	0.01	0	0.04	0.04	0.11	0.14	0.07	0	0	0.08	0	0	0	0.03	0.02	0.13	0.03	0	0.03	0
XLOC_002496	0.03	0.01	0.01	0.02	0	0.03	0.04	0	0.12	0.11	0.65	0.08	0.03	0.05	0.04	0.06	0.13	0.23	1	0.84	0.66	0.53	1.12	0.86	0.25	0.07	0.82	0.6	0.75	0.57	1.2	1.07	0.5	0.56	0.68	0.53	0.06	0.41	0.22	0.21	0.27	0.36	1.68	1.32	1.36	1.18	1.72	1.38	0.14
XLOC_002497	0.05	0	0	0	0	0	0	0	0.06	0	0.2	0.05	0	0.03	0	0.03	0	0.04	0.15	0.05	0.26	0.53	0.8	0.16	0	0	0.32	0.4	0.48	0.43	0.65	0.44	0.21	0.39	0.23	0.19	0.25	0.6	0.5	0	0.16	0.29	0.35	0.58	0.94	1.25	1.31	1.11	0.05
XLOC_002503	0.07	1.06	0.11	0.06	0.07	0.06	0.07	0.2	0.13	0.08	0.08	0.04	0.16	0	0.04	0	0	0.12	0	0.07	0.07	0	0	0	0	0.33	0.21	0.16	0	0.04	0.24	0.37	0	0.11	0.07	0.37	0.13	0.15	0.17	0.51	0.33	0.08	0.13	0	0.53	0	0.61	0	0.17
XLOC_002506	1	0.74	1.65	1.11	1.05	1.97	1.22	1.01	0.45	0.34	0.48	0.65	0.56	0.71	0.45	0.58	0.18	0.11	0.47	0.25	0.32	0.45	0.46	0.31	0.25	0.2	0.64	0.24	0.28	0.56	0.32	0.37	0.41	0.41	0.32	0.12	0.18	0.53	0.46	0.17	0.37	0.43	1.5	0.65	1.05	0.83	0.87	0.65	0.5
XLOC_002512	0	0.01	0.08	0.05	0.06	0.07	0.13	0.31	0.05	0.26	0.27	0.2	0.17	0.22	0	0.07	0.28	0.15	0.14	0.17	0.36	0.1	0.17	0.07	0.11	0.18	0.1	0.07	0.12	0.06	0.08	0.05	0.26	0.15	0.06	0.04	0.02	0.1	0.2	0.02	0.08	0.41	0.31	0.05	0.27	0.17	0	0.07	0.07
XLOC_002514	0	0	0	0	0	0	0	0	0.01	0	0.14	0.08	0	0.07	0.04	0.04	1.06	0.42	1.1	0.87	0.25	0.42	0.2	0.06	0.32	0.62	0.14	0.42	0.14	0.28	0	0	0.54	0.51	0.28	0.05	0.04	0.03	0.2	0	0.87	1.21	0.54	0.56	0.18	0.19	0	0.15	0.73
XLOC_002516	0	0	0	0	0	0	0	0.09	0	0	0	0	0	0	0.16	0.21	0.07	0.03	0.53	0.13	0.65	0.68	0.47	0.14	0.11	0.31	1.27	0.27	0.9	1.19	0.23	0.46	0	0	0.09	0	0	0.14	0.19	0	0	0	0	0	0	0	0	0.04	0
XLOC_002517	0.03	0	0.08	0.23	0.13	0.08	0.75	0.38	0	0.02	0.07	0.09	0.03	0.04	1.49	0.27	9.39	5.97	6.59	7.77	5.71	5.4	9.13	6.06	11.57	12.6	10.63	11.64	11.17	4.23	12.44	7.02	0.49	1.03	0.33	0.8	0.16	0.55	0.84	0.65	0	0.04	0.05	0.22	0.11	0.2	1.58	0.54	2.93
XLOC_002519	0.04	0.16	0.05	0.04	0.06	0	0.09	0.03	0.04	0	0.05	0	0.02	0	0	0	0.66	0.87	0.3	0.38	0.7	0.3	0.34	0.54	0.44	0.38	0.4	0.36	0.48	0.16	0.44	0.42	0.16	0.15	0.09	0.01	0.01	0	0.02	0	0.22	0.4	0.07	0.35	0.24	0.09	0.33	0.52	0.69
XLOC_002520	0	0	0	0	0	0	0	0	0	0	0	0	0	0	0	0	0	0	0	0.21	0	0	0	0	0	0.16	0.04	0.07	0	0.08	0	0	0	0	0	0	0	0	0	0	0.08	0	0	0.57	0.21	0	0	0	0.08
XLOC_002521	0	0	0	0	0	0	0	0	0	0	0	0	0	0	0	0	0	0	0	0.12	0	0	0	0	0	0	0	0	0	0	0	0	0	0	0	0	0	0	0	0	0	0	0	0	0	0	0	0	0
XLOC_002522	0	0.1	0	0.15	0.16	0.12	0.09	0.08	0	0.16	0.05	0.11	0.01	0.03	0.12	0.01	0.05	0.07	0	0.28	0.11	0.03	0.13	0.02	0.08	0.04	0	0.3	0.01	0	0.11	0.13	0.03	0.04	0.13	0.26	0.12	0.2	0.44	0.48	0	0.03	0.05	0.05	0.1	0.03	0.24	0.06	0
XLOC_002523	0	0	0	0	0	0	0	0	0	0	0	0	0	0	0	0	0.02	0.27	0	0.19	0	0	0	0	0.04	0	0	0	0	0.15	0	0	0.12	0.05	0	0	0	0	0	0	0	0.04	0	0	0	0	0	0	0.07
XLOC_002531	0	1.48	0.17	0	0	0	0	0.07	0.05	0.08	0	0	0	0.05	0	0	0.12	0	0	0.08	0.07	0	0	0.14	0	0	0	0	0	0	0	0.05	0.35	0.12	0	0.32	0.07	0	0.09	0.18	0.36	0.09	0	0	0	0.05	0	0.05	0
XLOC_002533	0.12	0.01	0.03	0	0	0	0.07	0	0	0	0.02	0	0	0	0	0	0	0	0.1	0	0	0	0.09	0	0.02	0.01	0.04	0.01	0	0	0.18	0	0.01	0.01	0	0	0	0	0	0	0.02	0.04	0	0	0	0	0.01	0	0.04
XLOC_002534	2.38	0.77	1.66	0.55	0.14	1.69	3.84	7.13	0.58	0.99	1.07	1.16	1.53	1.73	2.56	3.3	0.16	0.42	0.57	0.26	0.34	0.26	1.24	3.77	0.36	0.11	0.42	0.29	0.11	0.4	1.54	2.78	0.53	0.37	0.81	0.59	0.38	0.42	1.56	2.85	0.73	0.34	1	0.12	0.14	0.3	0.87	3.05	0.68
XLOC_002535	0.14	0.18	0.12	0.26	0.1	0.11	0.06	0.14	0.04	0.02	0	0.01	0.01	0.07	0	0.01	0.04	0	0	0	0.02	0.1	0	0.03	0.07	0.08	0.06	0	0.03	0	0.01	0	0.03	0.02	0.04	0.04	0	0	0.07	0.02	0.09	0.06	0	0	0.05	0.05	0.18	0	0
XLOC_002537	0	0	0.04	0	0.65	0.05	0	0.21	0	0.16	0.34	0.03	0.13	0	0	0	0.13	0	0	0	0	0	0	0.1	0.07	0.03	0.17	0	0	0	0	0.04	0	0	0.11	0	0	0	0	0	0	0.1	0	0.15	0.07	0.04	0	0.2	0
XLOC_002539	0.19	0.27	0.49	0.24	0.25	0.18	0.09	0.41	0.26	0.01	0.17	0.07	0.02	0.15	0.03	0.11	0.06	0.02	0.11	0.13	0.04	0.1	0.19	0.07	0.21	0	0.36	0.05	0.15	0.16	0.06	0.04	0.09	0.1	0.15	0.05	0.03	0.03	0	0.13	0.15	0.06	0.18	0.12	0.02	0.06	0.04	0.13	0.05
XLOC_002541	0	0	0	0.03	0	0.07	0.13	0.1	0.01	0.04	0.04	0.21	0.03	0.12	1.07	0.61	0.06	0.21	0.04	0.04	0.04	0.07	0.22	0.14	0.02	0	0.1	0.02	0	0.17	0.11	0.13	0.23	0	0.04	0.7	0.37	0.31	0.78	0.91	0	0	0	0.15	0	0.06	0.43	0.17	0.04
XLOC_002549	0.4	0.57	0.72	0.25	0.27	0.46	0.25	0.08	0.46	0.18	0.75	0.25	0.26	0.24	0.14	0.26	1.05	1.66	0.65	0.53	0.41	0.23	0.22	0.63	0.36	0.65	0.4	0.2	0.22	0.27	0.3	0.31	1.86	2.83	0.78	0.31	0.29	0.5	0.11	0.49	0.64	0.48	1.15	0.38	0.42	0.79	0.51	0.29	1.28
XLOC_002551	0	0.05	0.11	0.14	0	0	0.11	0.02	0.03	0.04	0.2	0	0.05	0.1	0.04	0.13	0.42	1.02	0.4	0.52	0.51	0.65	0.23	0.65	0.29	0.15	0.04	0.04	0.09	0.12	0.14	0.14	0.41	0.69	0.16	0.19	0.11	0.08	0.06	0.11	0.04	0.01	0.04	0.25	0.23	0.31	0.3	0.08	0.88
XLOC_002561	0	0	0	0	0	0	0	0	0.01	0	0	0	0	0	0	0	0.12	0.09	0.1	0.22	0.05	0.1	0.05	0.19	0.27	0.23	0.03	0.12	0	0.07	0.13	0.08	0.24	0.25	0	0.05	0	0	0.02	0	1.31	0.79	0.56	0.57	0.32	0.37	0.41	0.46	0.34
XLOC_002562	0.38	0.62	0.15	0.2	0.13	0.08	0.08	0.06	1.22	1.79	1.93	0.88	0.77	0.82	0.6	0.65	3.8	2.4	4.73	2.5	2.75	5.14	3.24	4.32	2.31	4.15	3.64	3.45	2.78	5.07	3.69	4.29	2.09	2.91	2.76	2.18	1.15	2.39	0.85	1.89	2.68	4.09	5.12	2.21	4.13	4.99	4.37	3.81	1.89
XLOC_002570	0.33	0.31	0.08	0.33	0.14	0.09	0.15	0.15	0.21	0.14	0.09	0.12	0.18	0.1	0.05	0.07	0.5	0.23	0.04	0.27	0.18	0.16	0.19	0.16	0.09	0.4	0.03	0.33	0	0	0	0.15	0.17	0.34	0.07	0.09	0.03	0.11	0.08	0.06	0.11	0.48	0.32	0.13	0.11	0.39	0.07	0.19	0.41
XLOC_002573	0.03	0	0.2	0.04	0	0.02	0.1	0.1	0.08	0.09	0.16	0.19	0.02	0	0.11	0.03	0.04	0.24	0.11	0.27	0.15	0.37	0.4	0.05	0.22	0.02	0.17	0.41	0.35	0.27	0.09	0.43	0.85	0.15	0.31	0.03	0.14	0.12	0.06	0.13	0.28	0.03	0.2	0.21	0.2	0.03	0.38	0.04	0.57
XLOC_002574	0	0	0	0.13	0	0	0	0	0	0	0.25	0	0.13	0.32	0	0	0.17	0.19	0.24	0.08	0.43	0	0.06	0.14	0.31	0.13	0.4	0.5	0.1	0.43	0	0	0	1.66	0.07	0	0.28	0.08	0	0	0.35	0.22	0.36	0	0	0.19	0	0	0.27
XLOC_002576	0	0	0.04	0.41	0.05	0.05	0.05	0.05	0.15	0.06	0	0.67	0.11	0	0	0.33	0	0.12	0.05	0	0.1	0.06	0.17	0.09	0.09	0	0.15	0	0	0.5	0	0.16	0	0.08	0.29	0.1	0.27	0.38	0.12	0.3	0	0	0	0.13	0.09	0.03	0.18	0.07	0.12
XLOC_002577	0.07	0	0	0	0	0	0	0.06	0.12	0.07	0	0	0	0	0	0.08	0	0	0	0	0	0.08	0	0	0	0	0	0	0	0	0	0	0	0	0.18	0	0	0	0	0	0	0.43	0	0	0	0	0	0	0
XLOC_002581	0	0	0	0	0	0.03	0	0	0.02	0	0.16	0	0.03	0.04	0	0.07	0.11	0.12	0.16	0	0	0.19	0.22	0.53	0.19	0.12	0.11	0.19	0.06	0	0.03	0.13	0.27	0.05	0	0	0.05	0.06	0.04	0.07	0.05	0.03	0.05	0.13	0	0.19	0.36	0.13	0.07
XLOC_002583	1.32	2	4.74	5.49	2.76	3.73	2.25	2.5	3.2	4.35	9.12	9.88	4.36	6.26	4.4	4.15	2.34	2.63	6.16	8.97	3.98	5.74	4.76	3.96	3.46	4.56	9.69	8.74	5.5	8.31	6.01	5.5	3.06	4.44	7.68	8.53	6.56	7.56	5.05	6.12	2.43	2.63	6.31	6.89	3.7	5.31	5.54	3.53	2.31
XLOC_002585	0.07	0.01	0.03	0.01	0	0.05	0.03	0	0	0.01	0.07	0.01	0.02	0	0	0	0.02	0.05	0.09	0.03	0.14	0.15	0.18	0.04	0.02	0.1	0.16	0.05	0.04	0.12	0.05	0.01	0.04	0.03	0	0	0	0.02	0	0	0.08	0.07	0.05	0.21	0.08	0.07	0.06	0.11	0.06
XLOC_002586	0.13	0.03	0.04	0.01	0.04	0.03	0.09	0.02	0.04	0.01	0.09	0.01	0	0.03	0.04	0	0.46	0.2	0.34	0.05	0.36	0.25	0.21	0.32	0.09	0.26	0.33	0.1	0.39	0.39	0.36	0.39	0.04	0.22	0.02	0	0	0.1	0	0	0.1	0.07	0.58	0.47	0.24	0.33	0.48	0.13	0.25
XLOC_002587	0	0.03	0.05	0	0.04	0	0.03	0.35	0.47	0.02	0.6	0.45	0.27	0.36	0.2	2.03	0.45	1.6	1.85	1.2	0.94	1.25	0.98	2.49	1.88	0.87	1.59	0.8	0.77	1.53	1.02	3.62	1.57	0.49	0.85	0.41	0.31	0.62	0.53	2.65	2.34	0.94	2.3	0.62	0.69	0.88	0.67	2.62	2.16
XLOC_002591	0	0.08	0.06	0	0	0	0	0.04	0	0	0.04	0.09	0.04	0.05	0.09	0.28	0.26	0.06	0	0	0	0	0.23	0.17	0.05	0.36	0.3	0	0.03	0.07	0.04	0.25	0.18	0.15	0.11	0.12	0.21	0.34	0	0	0.25	0.27	0.41	0.29	0.34	0.22	0.3	0.58	0.14
XLOC_002593	0.06	0	0	0	0	0	0	0	0	0	0.02	0	0	0	0	0	0.07	0.05	0	0.06	0.14	0	0.02	0	0	0.02	0	0	0	0	0	0	0.02	0	0	0.03	0	0	0	0	0.02	0.34	0	0.06	0.24	0	0.08	0	0
XLOC_002594	0.26	0.28	0.34	0.29	0.77	0.25	0.25	0.29	0.2	0.13	0.2	0.18	0.09	0.05	0.15	0.15	0.77	0.73	1.22	0.64	0.99	0.7	0.79	0.41	0.53	0.38	0.67	0.49	0.49	0.35	0.51	0.58	0.55	0.38	0.11	0.14	0.24	0.13	0.2	0.13	1.38	2.17	1.51	1.56	1.6	1.23	1.58	1.97	0.76
XLOC_002595	0	0	0	0	0	0	0	0	0.03	0	0.08	0	0.11	0.06	0	0	0	0.04	0.1	0.15	0.23	0.62	0.36	0.31	0.03	0.03	0	0	0.35	0.3	0.14	0.47	0.26	0.15	0.14	0.15	0	0	0.3	0	0.22	0.08	0	0.05	0.09	0	0.35	0.41	0.23
XLOC_002597	3.22	2.61	1.4	3.41	2.53	3.84	2.98	2.78	0.08	0.16	0.06	0.21	0.17	0.45	0.21	0.05	0	0	0.01	0	0.13	0.14	0	0	0	0	0.14	0	0.01	0.09	0.02	0.01	0	0.07	0.16	0.03	0.36	0.15	0.15	0	0	0.02	0	0	0.02	0.1	0	0.01	0
XLOC_002598	0	0.04	0.04	0	0.05	0.05	0.1	0.05	0.12	0.16	0.16	0.17	0.06	0.12	0.12	0.09	0.19	0.36	0.05	0.61	0.24	0.32	0.04	0.22	0	0	0.18	0.92	0.03	0.37	0.31	0.1	0.6	0.62	0.44	0.92	0.27	0.49	0.12	0.59	0.06	0	0.06	0.24	0.15	0.06	0.32	0.39	0.35
XLOC_002600	0	0.45	0	0	0	0	0	0	0.05	0.35	0	0.09	0	0	0	0	0.25	0	0	0	0	0	0	0	0	0.27	0	0	0	0	0	0	0	0.3	0	0	0	0	0	0	0	0.19	0	0	0	0	0	0	0
XLOC_002604	0	0	0	0	0	0	0	0	0	0	0	0	0	0.04	0.04	0	0	0	0	0	0	0	0.12	0	0	0	0.09	0	0	0	0	0	0.06	0	0	0	0	0	0	0.17	0	0.08	0	0	0	0	0	0.16	0
XLOC_002605	0	0	0	0	0	0	0	0	0	0.02	0.07	0	0	0	0.03	0.01	0.82	0.68	0.43	0.07	0.07	0.08	0.23	0.28	0.03	0.32	0.02	0.18	0.08	0.08	0.26	0.07	0.05	0.06	0.05	0.02	0	0.14	0.04	0	0	0.04	0	0	0	0	0	0	0.11
XLOC_002606	0	0	0	0	0	0	0	0	0	0	0	0	0	0	0	0	0.23	0.05	0	0.13	0	0	0.05	0	0	0	0	0	0	0	0.14	0	0	0	0.18	0	0	0	0	0	0	0	0	0	0	0	0	0.04	0
XLOC_002607	0	0	0	0	0	0	0	0	0	0.1	0	0	0.17	0.66	0.29	0.24	0.01	0	0.02	0	0.01	0	0	0.01	0	0.02	0	0	0	0.05	0	0	0	0	0	0.04	0.09	0.06	0.16	0.07	0	0	0	0	0	0	0	0	0
XLOC_002608	0.1	0.12	0.1	0.21	0.13	0.05	0.12	0.08	0.1	0.13	0.21	0.29	0.04	0.05	0.23	0.18	0.2	0.17	0.15	0.25	0.15	0.04	0.22	0.2	0.27	0.07	0.15	0.16	0.1	0.21	0.23	0.08	0.2	0.14	0.07	0.24	0.24	0.17	0.19	0.21	0.05	0.22	0.1	0.03	0.06	0.11	0.26	0.09	0.09
XLOC_002609	0.17	0.12	0.22	0.14	0	0.09	0	0.15	0.26	0.09	0.02	0.11	0.22	0.16	0.27	0.16	0.2	0.4	0.35	0.13	0.06	0.04	0.03	0.12	0.15	0.06	0	0.02	0	0.04	0.15	0.06	0.2	0.28	0.35	0.34	0.12	0.28	0.16	0.04	0.08	0.43	0.08	0.02	0.04	0	0.21	0.21	0.08
XLOC_002612	0.01	0.01	0.01	0.01	0.01	0.01	0.02	0.01	0.24	0.28	1.96	0.12	0.08	0.12	0.13	0.15	7.73	6.45	6.58	6.83	4.69	5.07	5	3.97	5.69	5.28	5.5	5.81	4.18	3.51	3.86	3.86	3.86	3.59	2.73	1.74	1.46	1.71	2.08	1.13	4.51	5.48	4.91	5.03	3.5	3.87	3.43	4.65	5.83
XLOC_002614	0.3	0.33	1.44	0.23	0.45	0.82	0.27	0.46	0.1	0.12	0.31	0.03	0.27	0.24	0.16	0.15	0.33	0.13	0.17	0	0.09	0.08	0.16	0.22	0.35	0.09	0.48	0.14	0.08	0.33	0.04	0	0.07	0.05	0.28	0.19	0.06	0.17	0.23	0.07	0.31	0.05	0.18	0.41	0.41	0.69	0.16	0.22	0.07
XLOC_002616	0.06	0.13	0.11	0.02	0.09	0.11	0.15	0.17	0.11	0.32	0.1	0.08	0.09	0.2	0	0.04	0.2	0.19	0	0.22	0.03	0.04	0	0.03	0	0.38	0.14	0.1	0	0.04	0	0	0	0	0	0	0	0	0	0	0.03	0.28	0.02	0.1	1.44	0.21	0.36	0.19	0.04
XLOC_002618	0.69	0.37	3.49	2.1	0.46	1.85	0.99	1.05	0.98	1.19	5.96	2.44	0.54	2.42	2.65	1.4	0.39	0.72	6.4	3.39	0.4	3.74	3.11	1.56	0.63	0.64	7.24	3.3	0.54	4.92	2.6	1.55	1.14	0.92	5.35	3.29	0.63	3.63	2.82	1.36	1.11	0.51	4.36	2.88	0.88	3.5	3.3	1.79	0.77
XLOC_002619	0.39	0.18	0.28	0.61	0.25	0.22	0.06	1.15	0.38	0.1	0.34	0.03	0	0.51	0.07	0.07	0.09	0.05	0	0	0.47	0	0.21	0.22	0.33	0.04	0	0.2	0.73	0.7	0.28	0.08	0.33	0.1	0	0.38	0	0.13	0.15	0.44	0.39	0.32	0.33	0.07	0.5	0.27	0.7	0.09	0.22
XLOC_002620	0.06	0.12	0.15	0.07	0.24	0.1	0.03	0.24	0.05	0.05	0.27	0.02	0.03	0.03	0	0.07	0	0.16	0	0	0.14	0.04	0.05	0.08	0	0.03	0.07	0	0.08	0	0	0.13	0.11	0.18	0.09	0.03	0.1	0.19	0.04	0	0.17	0	0.12	0.12	0	0	0	0.19	0.1
XLOC_002621	0.11	0.2	0.23	0.04	0	0.14	0.02	0.12	0.05	0.15	0.53	0.06	0.01	0.01	0.16	0.09	0.08	0.18	0.29	0.13	0	0.26	0.06	0.4	0.18	0.09	0.28	0.61	0.21	0.14	0.03	0	0.11	0.08	0.22	0.21	0	0.16	0.06	0.33	0.03	0.01	0.1	0.15	0.11	0.03	0.37	0.23	0.18
XLOC_002622	0.44	3.46	0.49	0.64	4.86	0.35	0.4	0.39	0.81	4.32	1.07	0.72	5.5	0.96	1.05	1.2	4.95	0.31	1.37	0.56	6.1	0.74	0.54	0.46	0.65	4.72	0.23	0.42	4.41	1.56	0.4	0.33	0.83	3.34	1.11	1.49	6.06	1.19	0.75	0.61	0.71	6.53	1.29	0.72	5.3	0.47	0.74	0.85	0.42
XLOC_002623	0.13	0.09	0.17	0.02	0.1	0.07	0.22	0.23	0.08	0.23	0.11	0.07	0.1	0.21	0.04	0.17	0.02	0	0.18	0.1	0	0.1	0.04	0.22	0	0.09	0.07	0.1	0.05	0.02	0.14	0.61	0.13	0.1	0.24	0.1	0.13	0.22	0.15	0.41	0.06	0	0.22	0.03	0.03	0.03	0.04	0.05	0.12
XLOC_002627	0.32	0.34	0.2	0.2	0.06	0.27	0.17	0.5	0.19	0.08	0.13	0.08	0.12	0.2	0.05	0.05	0.11	0	0.26	0.4	0.17	0.19	0.08	0.22	0	0.26	0.04	0.03	0.28	0.08	0.14	0.35	0.11	0.21	0.47	0.12	0.03	0.33	0.15	0.39	0.24	0.24	0.39	0.14	0.15	0.29	0.13	0.17	0.21
XLOC_002631	0.15	0	0	0	0	0	0	0.13	0	0.27	0.27	0.27	0.12	0.21	0.04	0.13	0	0	0	0	0	0	0	0	0	0	0	0	0	0	0	0	0	0	0.14	0	0	0	0	0	0	0	0	0	0	0	0	0.6	0
XLOC_002635	0	0	0	0	0	0	0	0	0.07	0	0.06	0	0.02	0.02	0	1.2	0.18	0.03	0.5	0.36	0.08	0.25	0.03	0.53	0.16	0.16	0.44	0.17	0	0	0	0.08	0.24	0	0	0	0	0	0	0.05	0	0.07	0.26	0	0	0	0	0.08	0.23
XLOC_002640	0	0	0.04	0	0	0	0	0	0.07	0.05	0.44	0	0.03	0.02	0	0.09	0.41	0.07	0.62	0.24	0.25	0.22	0.22	0.29	0.05	0.05	0.12	0.14	0.15	0.35	0.13	0.21	0.26	0.23	0.26	0.09	0	0.09	0.04	0.1	0.08	0.35	0.24	0.34	0.4	0.4	0.31	0.74	0.17
XLOC_002641	0	0	0	0.03	0	0	0	0	0.02	0.04	0	0	0	0	0	0	0.12	0.33	0.04	0.17	0.12	0.05	0.47	0.44	0	0	0	0.22	0	0	0	0	0	0	0	0	0	0	0	0	0	0.02	0.05	0	0.08	0.08	0	0	0
XLOC_002651	0	0	0	0	0	0	0	0	0.14	0.11	0.1	0.05	0.02	0.28	0	0.04	0.19	0.31	0.14	0.26	0.12	0	0	0.03	0.28	0.29	0.3	0.05	0	0.1	0	0	0.36	0.1	0.09	0.23	0.06	0.21	0.16	0.11	0	0.33	0.04	0.27	0	0.06	0	0.18	0
XLOC_002653	0	0	0	0	0	0	0	0	0.24	0.19	0.18	0.19	0.06	0.17	0.08	0.26	0.54	0.75	0.17	0.42	0.2	0.2	0.12	0.12	0.67	0.76	0.22	0.35	0.22	0.13	0.04	0.02	0.32	0.41	0.05	0.17	0.25	0.12	0.15	0.52	0.73	0.68	0.09	0.07	0.1	0.06	0.06	0.03	0.94
XLOC_002654	0.05	0.03	0.04	0.07	0	0	0.02	0.09	0.17	0.18	0.19	0.25	0.28	0.29	0.11	0.24	0.16	0.18	0.03	0.21	0.06	0.09	0.13	0.19	0.22	0.22	0.19	0.18	0	0.06	0.03	0.16	0.16	0.15	0.04	0.34	0.25	0.08	0.11	0.22	0.03	0.08	0.03	0.09	0.01	0.02	0	0.03	0.22
XLOC_002655	0.13	0	0	0	0.06	0	0	0	0.1	0	0.03	0	0.04	0.02	0	0.02	0	0	0	0.03	0	0.32	0	0	0	0.07	0.04	0	0	0.02	0	0.12	0	0	0	0	0	0	0	0	0	0.11	0	0	0.17	0.12	0.04	0.09	0
XLOC_002656	0.13	0.05	0.16	0.15	0.11	0.17	0.26	0.08	0.12	0.08	0.56	0.3	0.17	0.22	0.49	0.22	0.28	0.26	0.25	0.4	0.37	0.18	0.44	0.32	0.08	0.08	0.19	0.27	0.51	0.32	0.29	0.39	0.26	0.17	0.76	0.4	0.72	1.13	0.82	1.02	0.32	0.18	0.56	0.41	0.42	0.47	0.79	0.55	0.24
XLOC_002657	0	0	0.06	0.07	0	0.04	0	0.05	0.28	0.2	0.11	0.72	0.28	2.08	1.7	0.58	0	0	0.03	0	0	0	0	0.03	0.02	0.05	0.1	0.1	0.1	0.07	0.07	0.09	0.03	0.09	0.23	0.3	0.28	0.46	0.14	0.05	0	0	0.09	0.05	0	0.03	0.02	0	0
XLOC_002663	0.23	0.22	0.53	0.33	0.37	0.52	0.19	0.49	0.06	0.1	0.04	0.06	0.02	0.02	0.02	0.05	0	0.07	0.18	0.05	0.02	0.08	0.02	0.09	0.02	0.01	0.02	0	0.03	0.05	0	0.07	0.02	0.1	0.05	0.11	0.01	0.01	0.05	0.06	0.15	0.04	0.08	0.14	0.1	0.06	0.13	0.07	0.05
XLOC_002671	0.06	0.03	0.95	0.79	0.76	0.81	0.23	2.3	0	0.01	0.67	0.25	0.22	0.28	0.16	0.5	0.2	0.25	0.69	0.3	0.46	0.09	0.24	0.58	0.25	0.08	0.44	0.21	0.19	0.36	0.11	0.4	0.23	0.13	0.3	0.05	0.26	0.24	0.07	0.46	0.03	0.01	0.42	0.36	0.29	0.23	0.14	0.81	0.15
XLOC_002674	0	0	0	0	0	0	0	0	0	0	0	0	0	0	0	0	0	0	0	0	0	0	0	0.14	0	0	0	0	0	0	0	0	0	0	0	0	0	0	0	0	0	0.04	0	0	0	0.79	0	0	0
XLOC_002675	0.02	0.14	0.13	0.11	0.28	0.13	0.22	0.12	0.03	0	0.01	0.01	0	0	0	0.05	0.14	0.14	0.13	0.04	0.12	0.27	0.07	0.25	0.04	0	0.36	0.03	0.15	0.21	0.48	0.22	0.16	0	0.1	0	0.11	0	0.1	0.18	0.04	0	0.04	0.3	0.6	0.23	0.11	0.33	0
XLOC_002676	0.87	0.62	0.66	0.69	1.12	0.66	0.85	0.72	0.13	0.48	0.31	0.09	0.35	0.49	0.15	0.38	0.31	0.29	0	0.05	0.05	0.46	0.17	0.05	0.27	0.21	0.06	0	0.1	0	0	0.1	0.55	0.24	0.41	0	0.09	0.06	0.06	0	0.3	0.5	0.39	0.03	0	0	0	0.15	0.12
XLOC_002677	0	0.11	0	0.16	0.6	0.21	0	0	0.02	0.17	0.08	0	0.02	0.05	0	0.02	0	0	0	0	0.04	0.1	0	0	0	0	0	0	0	0	0.35	0	0.18	0	0	0	0	0	0.05	0	0	0	0	0.02	0	0	0	0	0
XLOC_002679	0	0	0	0	0	0	0	0	0	0	0	0	0	0	0	0	0	0.05	0.06	0	0.06	0	0	0	0	0	0	0.07	0	0	0	0	0	0	0	0	0	0	0	0	0.59	0	0	0	0	0	0	0	0
XLOC_002680	0.74	1.4	4.07	3.65	4.87	4.19	5.32	7.77	0.02	0.02	0.08	0.03	0.03	0.03	0.04	0.01	0.13	0.14	0.31	0.21	0.23	0.17	0.33	0.14	0.09	0.14	0.25	0.17	0.31	0.12	0.22	0.29	0.1	0.11	0.08	0.05	0.03	0.05	0.05	0.07	0.2	0.23	0.41	0.42	0.32	0.34	0.38	0.35	0.22
XLOC_002682	0.08	0.26	0.76	0.64	0.58	0.84	2.59	0.35	0.15	0.07	0.25	0.01	0.33	0.28	0.68	0.55	0.18	0.06	0.03	0.14	0.15	0.34	0.31	0.29	0.06	0.12	0.14	0.3	0.1	0.93	0.52	0.34	0	0	0.39	0	0.29	0.12	0.97	0.6	0	0.17	0.14	0.32	0.26	0.24	0.57	0.51	0.09
XLOC_002685	0.07	0	0	0.05	0	0	0	0.06	0.16	0	0.04	0.07	0.15	0.16	0	0.08	0.2	0.11	0	0	0.5	0	0	0.24	0.23	0	0	0	0	0.08	0	0	0.15	0.21	0	0.07	0.42	0.07	0.08	0	0.38	0	0.66	0.18	0	0	0	0	0
XLOC_002687	0	0	0	0	0	0	0	0	0.13	0.15	0.1	0.1	0.08	0.04	0.08	0.02	0.16	0.19	0.3	0.54	0.5	0.63	0.47	0.38	0.03	0.04	0.16	0.47	0.26	0.41	0.83	0.37	0.06	0.12	0.11	0.29	0.24	0.23	0.22	0.27	0.1	0.18	0.03	0.1	0.14	0.11	0.22	0.15	0.21
XLOC_002691	0	0	0	0	0	0	0	0	0.14	0.15	0.06	0.08	0.52	0.23	0.15	0.02	0	0.06	0	0	0	0	0	0	0	0	0	0	0.05	0	0	0	0.09	0	0.15	0	0.07	0.04	0	0.05	0	0	0	0	0	0	0	0	0
XLOC_002693	0	0.01	0	0	0	0	0	0	0.17	0.31	0.34	0.63	1.01	0.73	0.47	0.33	0.03	0	0	0	0	0.02	0	0.03	0	0.02	0.04	0.04	0	0	0	0	0.07	0.09	0.46	0.2	0.18	0.39	0.37	0.15	0	0.01	0	0.01	0.03	0.02	0.01	0	0
XLOC_002699	0.55	0.21	0.66	0.28	0.84	1.14	0.33	0.49	0.19	0.15	0.32	0.39	0.28	0.34	0.18	0.18	0.26	0.13	0.31	0.13	0.33	0.1	0.26	0.28	0.34	0	0.26	0.22	0.52	0.16	0	0.03	0.24	0.2	0.41	0.05	0.4	0.09	0.19	0.12	0.23	0.23	0.19	0.11	0.38	0.3	0.38	0.39	0.12
XLOC_002701	0	0	0.17	0	0	0	0	0	0.09	0.45	0.02	0.04	0.34	0.36	0.02	0	0	0.06	0	0	0.39	0	0	0.1	0	0	0.29	0.14	0	0.19	0	0	0	0.06	0.07	0	0	0	0	0	0	0.06	0	0.04	0.05	0.02	0	0	0.4
XLOC_002702	0.08	0.1	0.05	0.03	0	0	0.07	0	0.13	0	0	0.34	0	0	0.02	0.02	0	0.03	0	0	0	0.23	0	0	0.06	0	0.11	0.04	0	0.09	0.08	0	0.03	0	0	0.07	0.03	0	0	0	0	0	0	0.04	0	0	0	0	0
XLOC_002703	0	0	0.1	0.07	0	0	0.04	0.04	0.08	0	0.02	0	0	0.01	0.14	0.04	0.03	0.1	0	0.09	0	0.03	0.19	0.06	0	0	0.02	0.03	0.29	0	0	0.05	0.08	0.03	0.21	0	0	0.05	0.13	0	0	0.07	0	0.02	0.08	0.05	0.09	0	0
XLOC_002704	0.45	0.07	0	0.03	0	0.06	0	0	0	0.04	0	0	0	0	0.02	0.02	0.05	0	0	0	0	0	0	0	0.17	0.23	0	0	0	0	0	0	0	0	0	0.03	0	0	0	0	0	0.04	0	0	0	0.02	0	0	0.08
XLOC_002705	0	0.02	0.1	0.12	0.03	0.14	0.06	0.15	0.18	0.28	0.13	0.19	0.26	0.36	0.36	0.22	0.56	0.31	0.52	0.38	0.24	0.41	0.27	0.26	0.59	0.28	0.25	0.06	0.21	0.17	0.26	0.48	0.4	0.4	0.41	0.45	0.08	1.08	0.37	0.33	0.11	0.03	0.1	0.15	0.21	0.23	0.13	0.16	0.39
XLOC_002706	0.25	0.12	0.18	0.14	0.11	0.3	0.04	0.24	0.24	0.08	0.11	0.35	0.21	0.13	0.1	0.17	0.11	0.25	0.16	0.54	0.21	0.33	0.26	0.16	0.17	0.13	0.31	0.21	0.19	0.53	0.02	0.04	0.18	0.07	0.06	0	0.08	0.12	0.27	0.31	0.09	0.44	0.19	0.24	0.27	0.4	0.48	0.23	0.18
XLOC_002707	0	0	0.23	0.21	0	0.37	0.1	0.05	0.48	0.4	0.65	0.4	0.21	0.55	0.57	0.72	0.89	0.21	0.55	0.32	0.44	0.46	0.82	0.23	0.12	0.09	0.12	0.23	0.81	0.42	0.44	0.53	0.08	0.04	0.41	0.16	0.19	0.62	0.31	1.22	0.24	0.15	0.49	0.25	0.26	0.13	0.41	0.26	0.06
XLOC_002708	0.25	0.14	0.36	0.75	0.12	0.14	0.68	0.22	0.05	0	0.04	0.09	0.13	0.05	0.14	0.05	0.15	0.1	0.08	0	0.07	0	0.26	0.18	0.3	0	0.21	0.06	0.15	0.49	0	0.38	0.06	0	0	0.08	0.04	0.17	0	0.14	0	0	0	0	0	0	0.08	0.42	0
XLOC_002709	0.03	0.02	0	0	0	0	0	0	0.5	0.22	0.31	0.39	0.63	0.43	0.23	0.14	0	0.02	0	0	0	0	0	0	0.11	0.06	0	0	0	0	0	0	0.1	0.02	0.05	0.27	0.28	0.4	0.25	0.09	0	0.06	0	0	0	0	0.02	0	0
XLOC_002713	0.78	0.82	0.56	1.61	1.43	1.2	1.93	1.05	0.6	0.8	0.84	1.29	1.74	1.22	1.22	0.95	0.39	0.66	0.65	0.63	0.74	0.3	0.85	0.25	0.26	0.25	0.42	0.62	0.49	0.2	0.23	0.25	0.11	0.29	0.4	1.05	0.97	0.28	0.97	0.47	0.26	0.2	0.13	0.12	0.05	0.13	0.14	0.12	0.35
XLOC_002714	0.16	0.79	1	0.71	1.5	1.06	1.3	0.89	0.26	0.41	0.68	0.55	0.85	0.69	0.51	0.54	0.37	0.15	0.3	0.42	0.47	0.33	0.71	0.65	0.78	0.6	0.64	0.33	0.29	0.49	0.2	0.42	0.69	0.48	0.31	0.8	0.3	0.14	0.54	0.18	0.55	0.52	1.31	0.63	0.58	1.43	0.68	0.53	0.25
XLOC_002715	0.43	0.2	0.16	0.29	0.28	0.19	0.27	0.26	0.17	0	0.56	0.15	0	0.16	0.16	0.08	0.1	0.22	0.07	0.28	0.26	0	0.11	0.43	0.24	0.2	0	0	0	0.09	0	0.18	0	0	0.07	0.42	0.12	0	0	0	0.16	0.08	0.12	0	0.26	0.22	0.1	0	0.24
XLOC_002718	0	0	0	0	0	0	0	0	0	0	0	0	0	0	0	0	0	0	0	0	0	0	0	0	0	0.12	0	0	0	0	0.54	0	0	0	0	0	0	0	0	0	0	0	0	0	0	0	0	0	0
XLOC_002719	0	0	0	0.03	0.02	0	0	0	0	0	0.4	0	0.25	0	0.01	0	0	0.03	0.36	0	0.25	0	0	0.05	0	0.11	0.2	0	0.21	0	0	0	0	0	0.46	0	0.29	0	0	0.07	0	0	0.14	0	0.12	0	0	0.03	0
XLOC_002721	0.72	0.47	0.69	1.01	0.34	0.18	0.41	0.3	0.22	0	0.2	0.24	0.17	0.29	0.13	0.06	0.22	0.16	0.14	0.1	0	0.08	0.03	0.12	0	0.25	0.19	0.38	0.09	0.08	0	0.21	0.17	0.64	0.1	0.2	0	0.21	0	0.08	0.13	0.3	0.17	0.21	0.14	0.29	0.26	0.05	0.19
XLOC_002724	0.17	0.47	0.14	0.23	0.51	0.17	0.16	0.25	0.07	0.15	0.12	0.23	0.74	0.5	0.33	0.38	0.33	0.27	0.09	0.31	0.08	0.07	0.14	0.1	0.23	0	0.58	0.3	0.18	0.19	0.2	0.3	0.04	0.62	0.08	0.14	0.02	0.27	0.57	0.26	0.43	0.39	0.55	0.26	0.8	0.03	0.62	0.18	0.26
XLOC_002726	0	0	0	0	0	0	0	0	0.34	0.41	0.08	0.06	0.12	0.27	0.22	0.09	0.63	0.21	0.4	0.54	0.31	0.68	0.44	1	0.42	0.25	0.21	0.64	0.13	0.38	0.44	0.15	0.33	0.3	0.3	0.21	0.09	0.22	0.09	0.18	0.18	0.15	0.27	0.52	0.41	0.67	0.54	0.16	0.3
XLOC_002728	0.04	0.05	0.14	0.09	0.3	0.25	0.12	0.14	0.3	0.19	0.33	0.08	0.09	0.22	0.13	0.01	0.19	0.19	0.17	0.24	0.02	0.26	0.14	0.02	0.25	0.19	0.14	0.04	0.05	0.1	0	0	0.14	0.11	0.05	0.15	0.28	0.02	0.16	0.13	0.11	0.12	0.09	0.04	0.08	0.16	0.01	0.08	0.17
XLOC_002730	0.3	0.29	0.42	0.36	0.42	0.26	0.47	0.58	0.42	0.46	1.09	0.46	0.37	0.29	1.11	1.04	0.07	0.07	0.27	0.11	0.26	0.3	0.36	0.27	0.15	0.17	0.62	0.29	0.52	0.47	0.61	1.04	1.16	1.4	3.01	1.87	1.54	2.34	2.06	3.32	0.12	0.15	0.65	0.57	0.4	0.4	0.92	0.8	0.07
XLOC_002731	0.02	0.01	0.03	0.01	0.02	0.11	0.05	0.05	0.09	0.1	0.21	0.38	0.19	0.22	0.04	0.04	0.12	0.1	0.24	0.21	0.26	0.55	0.52	0.21	0.13	0.22	0.65	0.28	0.3	0.79	0.55	0.54	0.14	0.14	0.17	0.09	0.07	0.08	0.1	0	0.07	0.19	0.2	0.24	0.17	0.19	0.3	0.22	0.18
XLOC_002732	0	0.05	0	0.03	0.07	0	0	0	0.02	0	0	0.12	0.16	0	0.04	0	0.08	0.09	0	0.22	0	0	0.06	0	0.02	0	0.02	0	0	0	0	0	0	0	0	0	0	0	0	0	0	0.13	0.02	0.08	0	0.02	0	0	0
XLOC_002739	0.02	0.03	0.03	0.12	0	0.08	0.33	0.05	0.11	0.03	0.11	0.1	0.02	0.1	0.36	0.12	0.16	0.09	0.02	0.04	0.03	0.06	0.26	0.13	0.09	0.04	0.04	0.05	0.02	0.03	0.28	0.04	0.09	0.12	0.08	0.13	0.06	0.05	0.28	0.09	0.14	0.11	0.15	0.06	0.01	0.11	0.17	0.07	0.06
XLOC_002742	0	0	0	0	0	0	0	0	0	0	0	0	0	0	0	0	0	0.07	0.09	0	0	0	0	0	0.1	0.02	0	0.27	0.08	0	0.07	0	0	0	0	0.25	0	0	0	0	0.02	0	0	0	0	0	0	0	0
XLOC_002744	0	0	0.05	0.06	0.07	0.06	0.19	0.25	0.37	0.15	0.51	0	0.04	0.2	0	0.24	0.1	0.33	0.14	0	0	0.26	0.06	0.24	0	0	0.55	0.04	0	0.04	0.08	0.17	0.15	0.05	0	0.14	0	0.07	0.33	0.24	0.04	0.04	0	0.07	0.25	0.42	0.29	0.1	0.08
XLOC_002750	0	0	0	0	0	0	0	0	0	0.06	0.03	0	0	0	0	0	0.65	0.27	0.35	0	0.02	0	0.15	0	0.15	0.23	0.04	0.24	0.03	0.1	0.01	0.02	0.17	0.24	0	0.03	0	0	0	0.06	0.19	0.03	0	0	0	0	0	0.02	0.27
XLOC_002751	0.1	0.04	0.17	0.12	0.11	0.13	0.04	0.07	0.7	0.53	2.67	0.4	0.14	0.16	0.23	0.2	8.11	6.5	6.59	6.39	5.95	5.55	5.76	5.39	10.1	10.57	8.13	6.17	7.57	6.39	7.77	7.91	7.14	6.9	5.42	3.02	1.88	3	2.99	1.66	6.76	8.26	8.98	7.49	7.61	8.41	7.94	8.9	6.5
XLOC_002752	0.09	0.03	0.06	0.04	0.02	0.02	0	0	0.14	0.09	0.43	0.04	0	0.08	0.12	0.04	2.32	1.44	2.16	1.63	1.67	2.38	1.68	1.6	0.64	0.46	1.31	1.04	1.32	0.77	0.96	0.93	0.5	0.92	0.75	0.39	0.21	0.62	0.21	0.23	1.61	2.3	2.17	2.47	1.09	1.89	1.62	2.88	1.56
XLOC_002753	0.08	0.1	0.02	0.04	0.06	0.02	0.05	0.09	0.16	0.1	0.54	0.09	0.13	0.11	0.07	0.08	1.74	1.45	1.49	1.49	1.25	1.77	1.26	1.37	1.19	1.23	1.03	1.34	0.76	0.87	1.07	0.77	1.01	1.08	0.91	0.43	0.38	0.89	0.61	0.32	1.62	1.6	1.39	1.58	1.3	1.42	1.4	1.73	1.23
XLOC_002754	0	0	0	0	0.02	0	0	0	0	0.01	0.06	0	0	0	0	0	0.33	0.17	0.65	0.12	0.18	0.15	0.29	0.23	0	0.23	0.37	0.23	0.02	0.04	0.12	0	0.23	0.04	0.07	0.05	0	0	0.23	0	0.18	0.48	0.19	0.1	0	0	0.28	0.2	0.19
XLOC_002755	0.06	0	0.24	0.14	0.23	0.48	0	0.05	0.16	0	0.73	0.2	0.2	0.21	0.01	0.12	0	0.07	0.94	0.19	0.14	0.47	0	0.17	0.08	0.11	1	0.5	0.31	1.25	0	0.09	0.21	0	0.89	0.34	0.02	0.38	0	0.24	0.22	0.14	0.69	0.32	0.31	0.7	0	0.13	0.15
XLOC_002761	0	0	0	0	0	0	0	0	0.09	0	0	0	0.04	0.09	0	0.09	0	0.06	0	0	0	0	0	0	0	0	0	0	0	0	0	0	0	0	0	0	0	0.83	0	0	0	0	0	0	0	0	0	0	0.09
XLOC_002762	0.08	0	0	0	0	0	0	0	0	0	0	0	0	0	0	0	0	0	0	0.23	0	0	0	0	0.66	0	0	0	0	0	0	0	0.23	0	0	0	0	0	0	0	0	0	0	0	0	0	0	0	0.09
XLOC_002766	0.02	0	0	0.04	0	0	0.03	0	0.07	0.06	0.01	0.02	0.03	0.13	0	0.03	0.25	0.78	0.18	0.27	0.33	0.45	0.05	0.34	0.35	0.09	0.04	0.09	0.16	0.08	0.15	0.12	0.26	0.09	0.01	0.03	0.03	0.05	0.04	0.05	0	0.01	0	0	0	0.02	0	0.02	0.09
XLOC_002767	0	0	0	0	0.07	0	0.07	0	0.13	0.06	0	0.02	0.06	0.38	0.08	0.45	0	0	0.08	0.04	0.14	0.05	0.06	0.03	0.02	0	0	0	0.07	0.04	0.08	0.55	0.14	0.17	0.07	0	0	0	0.26	0	0	0	0.06	0.34	0.04	0.09	0	0.03	0.08
XLOC_002768	0	0	0.03	0	0	0	0	0	0.39	0.14	0.11	0.12	0.08	0.51	0.45	0	0.09	0.1	0	0.04	0.08	0.05	0.07	0.06	0	0.1	0	0.26	0	0.01	0.02	0	0.06	0.13	0.04	0.04	0.04	0	0.2	0.17	0.13	0	0.2	0.15	0	0.05	0.18	0.06	0
XLOC_002769	0	0.02	0.03	0.09	0	0	0	0.02	0.15	0.01	0.04	0.4	0.27	0.2	0.32	0.38	0.03	0	0.02	0.14	0.21	0.2	0.13	0.22	0.07	0.03	0.12	0.17	0.03	0.13	0	0.2	0.03	0	0.04	0.3	0	0	0.11	0	0.03	0	0.01	0.12	0	0.07	0	0.03	0
XLOC_002772	0.03	0.06	0.08	0.18	0.06	0	0.05	0.08	0.19	0.08	0.09	0.03	0.14	0.02	0.19	0.22	0.61	0.14	0.18	0.09	0.16	0.28	0.28	0.18	0.28	0.21	0.15	0.47	0.13	0.19	0.6	0.29	0.25	0.39	0.08	0.11	0.03	0	0.17	0.1	0.26	0.06	0.03	0.01	0.26	0.26	0.14	0.04	0.16
XLOC_002773	0	0	0	0	0	0	0	0	0	0.39	0	0	0	0.04	0	0.04	0	0	0	0	0.13	0	0.35	0	0	0	0	0	0	0	0	0	0	0	0	0	0	0	0	0	0	0	0	0	0	0	0	0	0
XLOC_002779	0	0	0	0	0	0	0	0	0	0	0	0.01	0	0	0	0	0.78	0	0	0.14	0.13	0	0	0	0	0.29	0	0.01	0.09	0.07	0	0	0	0	0.02	0	0	0	0.03	0	0	0.08	0	0	0.06	0	0	0	0
XLOC_002780	0	0	0	0	0	0	0	0	0.06	0	0	0.03	0.08	0.04	0	0	0.42	0	0.02	0.36	0.6	0.03	0.08	0	0.16	0.27	0	0.01	0.46	0	0	0.07	0.05	0.07	0	0	0.1	0.1	0	0	0.03	0.2	0	0	0	0	0.05	0	0.16
XLOC_002781	0	0	0	0	0	0	0	0	0.16	0.06	0.07	0.03	0.05	0.07	0.08	0.07	0.06	0.51	0.22	0.08	0.26	0.33	0.24	0.89	0.93	0.09	0.51	0.33	0.7	0.36	0.36	1.03	0.9	0.12	0.16	0.14	0.05	0.1	0.07	0.04	0.54	0.09	0.21	0.28	0.55	0.49	0.34	0.22	0.75
XLOC_002782	0.05	0	0.22	0.08	0	0	0.05	0.09	0.09	0.13	0.05	0.05	0.03	0.26	0.14	1.15	0.4	0.12	0.1	0.1	0	0.12	0	0.91	0.26	0.31	0.11	0.11	0.22	0	0	1.12	0.29	0.26	0.1	0.1	0.04	0	0.18	1.43	0.11	0.03	0.2	0.08	0.06	0	0	0.03	0.4
XLOC_002784	0.05	0.07	0.09	0.07	0.08	0.1	0.03	0.39	0.31	0.12	0.44	0.44	0.43	0.29	0.41	0.39	0.12	0.1	0.39	0.34	0.37	0.33	0.27	0.45	0.17	0.07	0.12	0.24	0.38	0.24	0.43	0.2	0.03	0.15	0.47	0.29	0.57	0.47	0.57	0.49	0.15	0.05	0.08	0.24	0.2	0.41	0.13	0.23	0.08
XLOC_002787	0	0.05	0	0	0	0	0.28	0	0	0	0	0.08	0.12	0	0	0	0	0	0	0	0.07	0	0	0	0	0	0	0	0.48	0	0	0.14	0	0.23	0	0	0	0	0	0	0	0	0	0	0.18	0	0.42	0.31	0
XLOC_002788	0.08	0.03	0	0	0	0	0	0	0.05	0.02	0.08	0.02	0	0	0.04	0.05	0.03	0.03	0.04	0.08	0.25	0	0.16	0.03	0	0	0.09	0	0	0.14	0.22	0	0.03	0.12	0.04	0.04	0.03	0.21	0.14	0	0.07	0	0	0.1	0.14	0.1	0	0	0
XLOC_002790	0.07	0.08	0.1	0.05	0.04	0.01	0.17	0.14	0.44	0.4	0.69	0.6	0.74	0.95	0.83	0.68	0.04	0.09	0.07	0.1	0.16	0.24	0.15	0.27	0.3	0.25	0.17	0.21	0.26	0.25	0.06	0.41	0.46	0.43	0.66	0.51	0.81	1.12	0.69	1.11	0.06	0.07	0.17	0.17	0.17	0.18	0.22	0.26	0.09
XLOC_002793	0.15	0.02	0.04	0	0.03	0.05	0.05	0.1	0	0.02	0.09	0.11	0	0	0.2	0.05	0	0	0	0.09	0.11	0	0.09	0.05	0.02	0	0.13	0.18	0	0.02	0	0.11	0.09	0.02	0.03	0.03	0.03	0.06	0.07	0	0.28	0.1	0.1	0.03	0.03	0.02	0.02	0	0.2
XLOC_002794	0	0	0	0	0	0	0	0	0.02	0.04	0.05	0	0	0.04	0.04	0.04	0.25	0.21	0.28	0.03	0	0.04	0.06	0.3	0.06	0.02	0.43	0.02	0.09	0.23	0	0	0.03	0	0	0	0	0	0.04	0	0.08	0.15	0.08	0	0	0	0.14	0.19	0.04
XLOC_002797	0.06	0.04	0.02	0.02	0.15	0.06	0.05	0	0.1	0.04	0.21	0.09	0.03	0.08	0.08	0.03	0.07	0.07	0.06	0.03	0.07	0.05	0.01	0.05	0.09	0.05	0.12	0.06	0.1	0.08	0	0.03	0.08	0.04	0.15	0.12	0.14	0.02	0.05	0	0.03	0.07	0.05	0.09	0.02	0.08	0.07	0.06	0.18
XLOC_002801	0	0	0	0	0	0	0	0	0	0.02	0.02	0	0.02	0	0	0	0	0	0.13	0.13	0.02	0.05	0	0.13	0.02	0	0	0	0	0.04	0	0	0	0	0	0	0	0.02	0.05	0.1	0	0	0	0	0	0	0.12	0	0.07
XLOC_002802	0.11	0.12	0.06	0.17	0.02	0.05	0.09	0	0.31	0.27	0.16	0.2	0.24	0.33	0.43	0.43	0.22	0.32	0.03	0.2	0.01	0.23	0.18	0.16	0.62	0.32	0.14	0.2	0	0.18	0.33	0.19	0.21	0.13	0.2	0.33	0.11	0.14	0.3	0.24	0.21	0.09	0.12	0.06	0	0.09	0	0.07	0.58
XLOC_002806	0	0	0	0	0	0	0	0	0	0	0	0	0	0	0	0	0	0	0	0	0	0	0	0	0	0	0	0	0	0	0	0	0	0	0	0	0	0	0	0	0	0	0	0	0	0	0	0.06	0
XLOC_002807	0.09	0.03	0	0.07	0.05	0.04	0	0.04	0.14	0.05	0.07	0.25	0	0	0.05	0.08	0.07	0.04	0.14	0.09	0.25	0.06	0.04	0	0.24	0.08	0.03	0.17	0	0.19	0.1	0	0	0.21	0.04	0.14	0	0.05	0.11	0	0	0.1	0.16	0.07	0.03	0.31	0.03	0	0
XLOC_002808	0	0	0.03	0	0	0	0	0	0	0	0.27	0	0	0	0	0	0	0	0	0	0	0	0	0	0	0	0	0	0	0	0	0	0	0	0	0	0	0	0	0	0.2	0.3	0.69	0.04	0	0.02	0.16	0	0.22
XLOC_002809	0	0.19	0.2	0.38	0	0.18	0.38	0.3	0	0.07	0	0.04	0	0	0.04	0.12	0.15	0.05	0	0.13	0	0	0.27	0.29	0.04	0.45	0	0.04	0	0	0.26	0.21	0	0	0	0	0	0.28	0	0	0.15	0.04	0.19	0.07	0	0.04	0.19	0.14	0
XLOC_002810	0	0	0.03	0	0	0.07	0	0	0.01	0	0.42	0.03	0	0	0	0	0.71	0.73	1.08	0.51	0.91	1.2	0.75	0.47	0.49	0.53	0.88	0.23	0.35	0.45	0.27	0.38	0.45	0.51	0.17	0.06	0.09	0.13	0.07	0.05	1.23	0.71	0.63	0.43	0.78	0.41	0.9	0.33	0.66
XLOC_002814	0.19	0.13	0	0.06	0.21	0.1	0.26	0	0.14	0.05	0	0	0.18	0.03	0.04	0.01	0.05	0.18	0.12	0.09	0.36	0.17	0.02	0.18	0.47	0.01	0.03	0	0.6	0.08	0	0.29	0.07	0.16	0.09	0	0.12	0.02	0.05	0	0.04	0.09	0.08	0.14	0	0.03	0	0.09	0
XLOC_002816	0.84	0	0	0.25	0	0.45	0.72	0.74	0.06	0	0	0.03	0	0.12	0.12	0.39	0.26	0	0	0.1	0	0.32	0.08	0.58	0.06	0.12	0	0	0	0.25	0	0.13	0	0	0	0.1	0	0	0.12	0	0	0.06	0.15	0.13	0	0	0.11	0.28	0
XLOC_002817	0.13	0.17	0.09	0	0.33	0.27	0.43	0.21	0.41	0.27	0.6	0.15	0.73	0.76	0.71	0.28	0.76	0.78	0.71	1.08	1.22	1.6	1.62	0.66	0.65	0.37	0.44	0.79	0.9	0.77	1.59	1.08	1.46	1.28	1.28	1.24	1.29	2.22	1.35	0.64	1.02	0.61	0.38	1.37	0.8	0.42	1.95	0.98	0.84
XLOC_002821	0	0	0	0	0	0	0	0	0	0	0	0.2	0.2	0.04	0.07	0.18	0.13	0	0.25	0.06	0	0.23	0.05	0.21	0	0	0	0.03	0	0	0.1	0	0	0	0.06	0	0.05	0	0	0	0.03	0.48	0	0	0	0	0.34	0	0.07
XLOC_002824	0.03	0.11	0.15	0.05	0.03	0	0	0.03	1.32	0.81	0.75	0.61	0.66	1.03	0.35	1.17	0.69	1.52	1.01	1.14	1.48	1.52	1.17	1.38	1.63	0.89	1.26	1.2	0.98	1.32	1.13	0.9	0.61	0.35	0.71	0.45	0.44	0.67	0.5	1.88	0.66	0.29	0.57	0.76	0.75	0.76	0.9	0.34	1.25
XLOC_002830	0.34	0.27	0.27	0.59	0.19	0.27	0.22	0.36	0.26	0.25	0.09	0.2	0.13	0.12	0.07	0.34	0.19	0.08	0.1	0.38	0.15	0.11	0.06	0.43	0.18	0.06	0.17	0.4	0.11	0.31	0.05	0.67	0.28	0.27	0.27	0.39	0.21	0.29	0.2	0.25	0.25	0.1	0.25	0.37	0.29	0.19	0.1	0.61	0.26
XLOC_002832	0.04	0.02	0.04	0	0.03	0.01	0.04	0.08	0.84	0.4	0.59	0.35	0.29	0.19	0.49	0.35	0.09	0.04	0.14	0.02	0.06	0.02	0.1	0.1	0.06	0.05	0.08	0.04	0.04	0.21	0.19	0.16	0.49	0.42	1.08	0.63	0.92	0.94	0.51	0.63	0	0.05	0.12	0.09	0.07	0.07	0.3	0.06	0
XLOC_002838	0.04	0.04	0.05	0.03	0.03	0	0.02	0.08	0.02	0.08	0.48	0.12	0.03	0.03	0	0.25	0.32	0.55	0.22	0.21	0.11	0.3	0.1	0.09	0.3	0.21	0.17	0.31	0.17	0.11	0.42	0.14	0.13	0.25	0.28	0.28	0.06	0.06	0.1	0.2	0.14	0.18	0.16	0.36	0.07	0.13	0.41	0.28	0.08
XLOC_002841	0	0	0.03	0	0	0	0	0	0	0	0.19	0.04	0	0.04	0	0	0	0	0	0	0.04	0.14	0	0	0.09	0	0	0	0	0	0	0	0	0	0	0.04	0	0.25	0	0.18	0	0.13	0	0	0	0	0	0	0.09
XLOC_002842	0	0.03	0.04	0	0	0	0.07	0.03	0.02	0.05	0.06	0.05	0	0.03	0.03	0.11	0	0.1	0.02	0.02	0.03	0.09	0.09	0.05	0.07	0.09	0.08	0.01	0.04	0.2	0.03	0.01	0.01	0.03	0.04	0	0.1	0.04	0.15	0.36	0	0.19	0	0	0.02	0.02	0.58	0	0.09
XLOC_002845	0.12	0.08	0.04	0.05	0	0.15	0	0.1	0.1	0	0	0	0	0	0	0	0.13	0	0.18	0.06	0	0	0	0.1	0.56	0.03	0.03	0	0	0.07	0	0.04	0	0	0	0	0	0	0	0	0.1	0.16	0	0.03	0.38	0	0	0	0
XLOC_002846	0.05	0.23	0.05	0.16	0.23	0.62	0.15	0.12	0	0	0.1	0	0.06	0	0.03	0.01	0.11	0.2	0.26	0.04	0.23	0.25	0.18	0.24	0.26	0.05	0.05	0.35	0.11	0.23	0	0.25	0	0.05	0	0	0.04	0	0	0	0.27	0.1	0.09	0.1	0.29	0.25	0.05	0	0.18
XLOC_002847	0.14	0.27	0.22	0.48	0.15	0.17	0.08	0.24	0.4	0.77	0.57	0.69	0.53	0.55	0.35	0.54	0.25	0.17	0.83	0.74	0.37	0.35	0.68	0.57	0.09	0.73	0.53	0.66	0.58	0.46	0.24	0.5	0.31	0.66	0.95	0.55	0.44	0.46	0.17	0.66	0.28	0.19	0.3	0.58	0.25	0.29	0.19	0.61	0.47
XLOC_002850	0	0	0	0	0	0	0	0	0.03	0.07	0.13	0.03	0.04	0.07	0.01	0.03	0.2	0.4	0.3	0.29	0.23	0.04	0.15	0.05	0.16	0.18	0.4	0.02	0	0.02	0.03	0.02	0.03	0.01	0.15	0.04	0.05	0.06	0	0.04	0.03	0.1	0.04	0.07	0.2	0	0	0.02	0.1
XLOC_002851	0.38	0.23	0.15	0.15	0.1	0.17	0.18	0.16	0.16	0.11	0.37	0.13	0.02	0.11	0.13	0.13	0.98	0.95	1.62	1.04	1.05	1.47	0.61	1.1	0.68	0.42	1.25	0.89	1.01	0.79	1.03	0.87	0.62	0.29	0.42	0.08	0.02	0.06	0.24	0.09	0.65	0.8	0.94	1.1	0.68	0.79	0.45	0.47	0.61
XLOC_002852	0.28	0.09	0.04	0.13	0.08	0.13	0.18	0.09	0.09	0	0.5	0.02	0.08	0.05	0.06	0.17	0.85	0.99	1.08	1.14	0.58	0.35	1.44	0.79	0.75	0.43	0.75	0.81	0.34	0.96	0.67	0.5	0.21	0.3	0.08	0.16	0.13	0.28	0.08	0.32	0.37	0.37	0.94	0.43	0.22	0.28	0.69	0.41	0.87
XLOC_002857	0	0	0	0	0	0	0	0	0	0.08	0.03	0	0.03	0	0.02	0	0.13	0.3	0.12	0.06	0	0.07	0.14	0	0.13	0	0.13	0.03	0.04	0	0.05	0	0	0.09	0	0	0	0	0.03	0	0.07	0.11	0	0	0	0	0	0	0.1
XLOC_002862	0.19	0.03	0.05	0.06	0	0.07	0	0.03	0.09	0.14	0.06	0.02	0	0	0.08	0.04	0	0.12	0.23	0.04	0.03	0	0.27	0.07	0	0.02	0.06	0.04	0.05	0	0.02	0.26	0.08	0.25	0	0	0.13	0.12	0	0	0.02	0.29	0	0	0.02	0	0.1	0.05	0.13
XLOC_002863	0	0.11	0	0.22	0.23	0.02	0	0.06	0.03	0	0	0.03	0.01	0	0.03	0.03	0.03	0.17	0.02	0.02	0	0.07	0	0.02	0.02	0.21	0	0	0	0	0	0	0	0	0.05	0	0.06	0	0.04	0	0.11	0.01	0.01	0.04	0.02	0	0	0	0.02
XLOC_002864	0	0.04	0.08	0	0	0	0	0	0	0	0	0.06	0.09	0.15	0	0.03	0	0.12	0	0.05	0	0	0	0.05	0.06	0	0.33	0.06	0.27	0	0	0.29	0.08	0	0	0.1	0.73	0.27	0	0.24	0	0.06	0	0	0	0	0.04	0	0
XLOC_002866	0.04	0	0.03	0.05	0.04	0.06	0	0	0.23	0.11	0.25	0.22	0.18	0.19	0.17	0.3	0.05	0.09	0.09	0.02	0.03	0.04	0	0.05	0.21	0.09	0.31	0.09	0.29	0.07	0.13	0.04	0.03	0	0.23	0.1	0.18	0.34	0.24	0.16	0.01	0	0.02	0.02	0	0	0	0	0.01
XLOC_002867	0	0	0	0.03	0	0	0	0	0	0	0.08	0.06	0.14	0.08	0	0.04	0.08	0	0.07	0.18	0.27	0.27	0.06	0	0	0.38	0.62	0.44	0.46	0.02	0.08	0.47	0	0	0.07	0.14	0.06	0.08	0	0.08	0	0	0	0	0	0	0	0	0.04
XLOC_002869	0	0	0	0	0	0	0	0	0.12	0.07	1.11	0.22	0.11	0.08	0.04	0.13	9.36	8.84	4.36	3.84	4.37	3.41	4.58	3.07	4.81	3.49	3.41	2.38	2.23	0.98	1.61	0.92	0.65	0.97	0.35	0.19	0.15	0.21	0.19	0.69	0.03	0.1	0	0	0	0.03	0	0	3.48
XLOC_002872	0	0.19	0.16	0	0	0	0	0.25	0.23	0	0	0	0.09	0	0	0	0.04	0.13	0	0	0.71	0.14	0	0.05	0	0	0.13	0	0.1	0	0	0	0.08	0.08	0	0	0	0	0	0	0.34	0	0.13	0.03	0.1	0	0	0	0.06
XLOC_002876	0	0	0	0	0	0	0.09	0	0	0	0.02	0	0.03	0	0	0	0	0.04	0.05	0	0	0	0.08	0	0	0	0	0	0	0	0	0	0.03	0	0	0.09	0	0	0	0.05	0	0	0	0	0	0	0.03	0.06	0
XLOC_002877	0.4	0.38	0.49	0.45	0.89	0.73	0.31	0.8	0.6	0.18	0.23	0.03	0.55	0.16	0.31	1.18	0.32	0.26	0	0.22	0.31	1.03	0.31	0.43	0.41	0.12	1.11	0.26	0.39	0.34	0	0.28	0.65	0.38	0.42	0.61	0.1	0.93	0.72	0.32	0.84	0.8	0.47	0.28	0.27	0.17	0.46	0.84	0.51
XLOC_002880	0	0.02	0.08	0.14	0.29	0.25	0.03	0.03	0	0.08	0.02	0.06	0.08	0.1	0.06	0	0	0	0	0.04	0	0	0.17	0.16	0	0	0.04	0	0.11	0.02	0.04	0	0.05	0	0	0.04	0.09	0	0	0.08	0	0.08	0.2	0	0.04	0.04	0	0.2	0.12
XLOC_002891	0.11	0.04	0.08	0.09	0.03	0	0	0.02	0.05	0	0.08	0.03	0.16	0.17	0.15	0.06	0.13	0.13	0.11	0.05	0	0	0	0.02	0.06	0.04	0.09	0.01	0.05	0.08	0.03	0.08	0.06	0.04	0.15	0.26	0	0.03	0.03	0	0.12	0.04	0.15	0.1	0.05	0	0	0.22	0
XLOC_002892	0.02	0.05	0.04	0.03	0.04	0.02	0.07	0.09	0.23	0.15	0.06	0.11	0.21	0.25	0.4	0.29	0.2	0.09	0.04	0.06	0.11	0.07	0.1	0.16	0	0.27	0.07	0	0	0.21	0.15	0	0.1	0.34	0.15	0.04	0.05	0.17	0.4	0.14	0.02	0.18	0.16	0.05	0.08	0.07	0.32	0.27	0
XLOC_002894	0.34	0.3	0.36	0.55	0.53	0.37	0.52	0.66	0.62	0.81	1.26	0.82	0.54	0.44	1.75	0.92	0.29	0.26	0.73	0.53	0.47	0.59	0.48	0.74	0.27	0.44	0.72	0.43	0.71	0.87	1.04	0.98	1.3	1.64	3.12	2.61	1.77	2.06	2.08	4.5	0.37	0.38	0.6	0.91	0.66	0.75	1.8	0.78	0.24
XLOC_002898	0.18	0.09	0.11	0.33	0.1	0.09	0.1	0.18	0.06	0.19	0.14	0.26	0.17	0.03	0.13	0.02	0.11	0.28	0.26	0.3	0.35	0.41	0.29	0.2	0.07	0.39	0.15	0.35	0.03	0.14	0.41	0.34	0.15	0	0.12	0.92	0.6	0.11	0.24	0.41	0.59	0.23	0	0.25	0.03	0.05	0	0.02	0.23
XLOC_002901	1.21	0.06	1.35	1.02	1.36	0.42	0.24	7.41	0.22	0.08	0.04	0.08	0.2	0.07	0	0.38	0.04	0.02	0.09	0.2	0.13	0.17	0	0.44	0.05	0.17	0.03	0.12	0.23	0.1	0	0.09	0.23	0.02	0.16	0.11	0.12	0.15	0	0.78	0.03	0.08	0.06	0.23	0.02	0	0.02	0.2	0
XLOC_002905	0.03	0.01	0.02	0.03	0.02	0.01	0.02	0.01	0.85	0.66	0.83	0.24	0.11	0.22	0.26	0.33	1.46	1.43	0.83	0.95	0.76	0.68	0.74	0.75	1.51	1.77	1.12	1.6	0.82	0.77	0.62	0.7	1.24	1.16	0.8	0.93	1.14	0.96	1.42	1.23	1.25	1.65	0.69	0.61	0.55	0.59	0.64	0.59	1.38
XLOC_002906	0	0	0	0	0	0	0	0	0.13	0.46	0.08	0.09	0.16	0.04	0.02	0.08	0.51	0.15	0.07	0.29	0.3	0	0.18	0.14	0.26	0.39	0.09	0.22	0.41	0.14	0.65	0.06	0.59	0.22	0.21	0.13	0.22	0.03	0.08	0.15	0.2	0.2	0.22	0.1	0.12	0.2	0.11	0.02	0.29
XLOC_002913	0.65	0.19	0.49	0.17	0.28	0.53	0.3	0.48	0.08	0.11	0.21	0.11	0.04	0.24	0.18	0.21	0.1	0.14	0.11	0	0.07	0.09	0.06	0.12	0.22	0.1	0.44	0.19	0	0.09	0.23	0	0.34	0.29	0.27	0.28	0.15	0.41	0.12	0.04	0.22	0.24	0.2	0.13	0.06	0.37	0.1	0.32	0.24
XLOC_002914	0	0	0	0	0	0	0	0	0	0	0	0	0	0	0	0	0	0	0.08	0	0.07	0	0	0.07	0	0	0	0	0	0	0	0	0	0	0	0	0	0.08	0	0	0	0	0	0	0	0.52	0	0	0
XLOC_002916	0	0.15	0	0	0.18	0	0.14	0	0	0.04	0.1	0.04	0.12	0.08	0.1	0.09	0.03	0.14	0.11	0.22	0.14	0.05	0	0.19	0	0.08	0.04	0.08	0.09	0.18	0.04	0.05	0	0.03	0.07	0	0.06	0.35	0.39	0.3	0.17	0.08	0	0.04	0.2	0.29	0	0.03	0.08
XLOC_002921	0	0.09	0.25	0.12	0	0	0	0	0	0	0	0	0	0	0	0	0.14	0.12	0.05	0.05	0.16	0.06	0.12	0.06	0.1	0.06	0.06	0.14	0	0.29	0.04	0	0	0.09	0.12	0.1	0	0	0	0	0.08	0	0	0.03	0	0	0	0.03	0.06
XLOC_002924	0.34	0.16	0.18	0.21	0.28	0.21	0.12	0.14	0.3	0.36	0.18	0.26	0.37	0.43	0.31	0.46	0.16	0.16	0.21	0.13	0.22	0.21	0.27	0.16	0.12	0.03	0.1	0.14	0.18	0.36	0	0.08	0.43	0.44	0.41	0.69	0.53	0.69	0.35	0.5	0.13	0.14	0.16	0.33	0.12	0.17	0.15	0.13	0.13
XLOC_002926	0.11	0.15	0.08	0.09	0.11	0.13	0.13	0.19	0.06	0	0	0.1	0.12	0.12	0.2	0.17	0.1	0	0.04	0.07	0	0	0.29	0.22	0.14	0.18	0.08	0.08	0	0.04	0.1	0	0.29	0.05	0.03	0.18	0.13	0.04	0.04	0.12	0.16	0.04	0.33	0.24	0.04	0.04	0	0.17	0.12
XLOC_002931	0	0	0	0	0	0	0	0	0	0	0	0	0	0.46	0.1	0.04	0	0	0	0	0	0	0	0	0	0	0	0.23	0	0	0	0	0	0	0	0	0	0	0.58	0.14	0	0	0	0	0	0	0	0	0.21
XLOC_002939	0.06	0.07	0.01	0.02	0.25	0.03	0.07	0.02	0.28	0.6	0.66	0.62	0.86	0.42	0.79	0.54	0.64	0.78	0.36	0.59	0.73	0.5	0.78	0.5	0.7	0.68	0.27	0.32	0.44	0.22	0.61	0.64	0.62	1.14	0.66	0.96	0.56	0.93	0.7	0.79	0.28	0.29	0.3	0.4	0.38	0.06	0.47	0.01	0.53
XLOC_002941	0.05	0.12	0.15	0.09	0.09	0.04	0	0.14	0.16	0.06	0.04	0	0.05	0.05	0.05	0.03	0.14	0.17	0.21	0.09	0.18	0	0.2	0.12	0.08	0.21	0.06	0.07	0	0	0.19	0	0.05	0	0.02	0.11	0.04	0	0	0.05	0.09	0.01	0.13	0.02	0.05	0	0.25	0.09	0.05
XLOC_002942	0.21	0.05	0.1	0.03	0	0	0.08	0.09	0.09	0.01	0.04	0.04	0.09	0.01	0.04	0.09	0.17	0.16	0.09	0.03	0.08	0.02	0.08	0.1	0.02	0.1	0.03	0.04	0	0.02	0	0.06	0.03	0.08	0	0.02	0.11	0.07	0.02	0.18	0.14	0.13	0.01	0.04	0.03	0	0.07	0.07	0.08
XLOC_002944	0	0	0	0	0	0	0	0	0.07	0.16	0	0	0.08	0.15	0.11	0.07	0.39	0.03	0	0.23	0.11	0.19	0.06	0.03	0.2	0.23	0	0.1	0.1	0.14	0	0.07	0.25	0.23	0	0.3	0.13	0.6	0	0	0.09	0.21	0.02	0.02	0.3	0.09	0	0.05	0.13
XLOC_002946	0.09	0.13	0.12	0.06	0.08	0.02	0.05	0.04	0.09	0.1	0.23	0.17	0.03	0.15	0.06	0.05	0.43	0.36	0.09	0.26	0.2	0.13	0.17	0.12	0.39	0.17	0.19	0.03	0.05	0.25	0.01	0.02	0.28	0.29	0.15	0.08	0.03	0.23	0.25	0.09	0.06	0.31	0.16	0.06	0.2	0.17	0.16	0.09	0.3
XLOC_002947	0.07	0	0	0	0	0	0	0	0.04	0	0	0	0	0	0.15	0	0	0	0	0	0	0.09	0	0.18	0.39	0.08	0	0	0	0.17	0	0	0	0.1	0	0	0.12	0	0	0	0	0	0	0	0	0	0	0	0.08
XLOC_002948	0	0.03	0	0	0	0	0	0	0	0.02	0	0	0	0	0	0.03	0.06	0.04	0.05	0	0	0	0	0	0	0	0	0.38	0	0	0	0	0	0	0	0	0.04	0	0.05	0	0	0	0	0	0	0	0	0	0.21
XLOC_002956	0	0	0	0	0	0	0	0	0.03	0	0.07	0	0	0.05	0.02	0.05	0.56	0.27	0	0.04	0.16	0.11	0.07	0.3	0.07	0.48	0.27	0.09	0	0.78	0	0.11	0	0.06	0	0	0.07	0	0	0	0.12	0	0.05	0.09	0.05	0.08	0.03	0.06	0
XLOC_002957	0	0	0	0	0	0	0	0	0	0	0	0	0	0	0	0	0	0.61	0	0	0	0	0	0	0	0	0	0	0	0	0	0	0	0	0	0	0	0	0	0	0	0	0	0	0	0	0	0	0
XLOC_002958	0	0	0	0	0	0	0	0	0.09	0	0.08	0	0	0	0	0	0.23	0.18	0.08	0.08	0.07	0.48	0.25	0.07	0.04	0.04	0.04	0	0	0.09	0.72	0.05	0.29	0.23	0.29	0.08	0.2	0	0.18	0	0	0	0.27	0.12	0.05	0.24	0.8	0.05	0.09
XLOC_002959	0	0	0	0	0	0	0	0	0.01	0.02	0.11	0	0.01	0	0	0.03	0.11	0.04	0.19	0.1	0.09	0.18	0.11	0.13	0.35	0.16	0.32	0.09	0.11	0.38	0.24	0.35	0.3	0.3	0.18	0.46	0.09	0.08	0.14	0.06	0	0.1	0.2	0.29	0.06	0.06	0.28	0.24	0.15
XLOC_002962	0	0	0	0	0	0	0	0	0	0.01	0.01	0	0.04	0	0	0	0.19	0.25	0.05	0.23	0.34	0.1	0.11	0.05	0.22	0.34	0.16	0	0.17	0.4	0.2	0.28	0.23	0.08	0	0	0.09	0	0.03	0	0.01	0	0.27	0.43	0	0.06	0.25	0.05	0.03
XLOC_002963	0	0	0	0	0	0	0	0	0.26	0.25	0.02	0.1	0.04	0.04	0.16	0.65	0	0.02	0	0	0	0	0.01	0	0	0	0	0	0	0	0	0	0	0	0.01	0.06	0.22	0	0.05	0.02	0	0	0	0	0	0	0	0	0
XLOC_002966	0	0	0	0	0	0	0	0	0.06	0.03	0	0	0.16	0.05	0.5	0.49	0	0	0	0	0	0	0	0	0	0	0	0	0	0	0	0	0	0.03	0	0	0.09	0.04	0.02	0.08	0	0	0	0	0	0	0	0	0
XLOC_002967	0	0	0	0	0	0	0	0	0.08	0.13	0.04	0.11	0	0.04	0.34	0.49	0	0	0	0	0	0	0	0	0	0	0	0	0	0	0	0	0	0	0.04	0	0.28	0.02	0.16	0.02	0	0	0	0	0	0	0	0	0
XLOC_002968	0	0.53	0	0	0	0	0	0	0.04	0	0	0	0	0	0	0	0	0	0	0	0	0	0	0	0	0	0	0	0	0	0	0	0	0	0	0	0	0	0	0	0	0	0	0	0	0	0	0	0
XLOC_002969	0.63	0.36	0.42	0.37	0.16	0.23	0.19	0.19	0.12	0	0.16	0.11	0.03	0.06	0.23	0	0.23	0.89	0.05	0.31	0.38	0.13	0	0	0.44	0.06	0	0.33	0.33	0.06	0.37	0.26	0.65	0.55	0.3	0.21	0.09	0	0.18	0	6.09	5.1	4.01	7.33	3.59	3.99	7.11	4.25	0.83
XLOC_002970	0.08	0.06	0	0	0.08	0	0	0	0.17	0.13	0.11	0.32	0.18	0.34	0.34	0.14	0.03	0	0.12	0.08	0.15	0.05	0.03	0	0	0	0	0.08	0	0.05	0.11	0.05	0.06	0.45	0.08	0.04	0.18	0.34	0.19	0.05	0.07	0.04	0	0.08	0	0.12	0.06	0.11	0.23
XLOC_002972	0.17	0.31	0.13	0.25	0.06	0.19	0.4	0.22	0.08	0.23	0.32	0.18	0.09	0.2	0.89	0.48	0.11	0.07	0.04	0.21	0.14	0.22	0.29	0.18	0.13	0.03	0.25	0.3	0.12	0.21	0.28	0.18	0.22	1.15	0.85	0.73	0.49	0.75	1	1.39	0.09	0.27	0.08	0.42	0.19	0.11	0.55	0.44	0.2
XLOC_002975	0	0.1	0.11	0.33	0.02	0.14	0.19	0.09	0.07	0.08	0.17	0.34	0.05	0.14	0.13	0.02	0.28	0.08	0.08	0.06	0.02	0.2	0	0	0.04	0.09	0.02	0.04	0	0.05	0	0.03	0.14	0.06	0.12	0.1	0.61	0.13	0.27	0	0.29	0.26	0.07	0.39	0	0.15	0	0.14	0.05
XLOC_002979	0.19	0.25	0.22	0.08	0.07	0.04	0.03	0.17	0.46	0.34	0.45	0.23	0.12	0.05	0.13	0.29	0.62	0.42	0.44	0.43	0.49	0.35	0.25	0.28	0.64	1.04	0.5	0.32	0.32	0.54	0.14	0.33	0.69	0.69	0.43	0.68	0.52	0.21	0.31	0.96	0.38	0.31	0.42	0.28	0.38	0.21	0.23	0.51	0.88
XLOC_002982	0.23	0.34	0	0.62	0.09	0.08	0.13	0.28	0.19	0.02	0.19	0.24	0.35	0.36	0.3	0.32	0.16	0	0	0.22	0.08	0	0.04	0.2	0.54	0.2	0.13	0.12	0	0.22	0	0.11	0.23	0.03	0.09	0	0.04	0.14	0.16	0.31	0	0.08	0	0	0.11	0.3	0.06	0	0.1
XLOC_002983	0.12	0.08	0.18	0.14	0	0	0	0	0	0	0.06	0.03	0.1	0.1	0.07	0.04	0.61	0.14	0	0	0.5	0.22	0.05	0.26	0.07	0	0.03	0.13	0.04	0	0.13	0.56	0.18	0.27	0.11	0	0	0	0	0.07	0.03	0.1	0.38	0.19	0.65	0.18	0.08	0.46	0
XLOC_002986	0.07	0	0	0	0	0	0.12	0	0	0	0.05	0.02	0	0.17	0	0	0	0.31	0.1	0	0	0	0	0.09	0.08	0	0	0.05	0	0	0	0.15	0.05	0.05	0	0	0	0.14	0.08	0	0	0.02	0.04	0	0	0	0.07	0	0.08
XLOC_002987	0	0	0.06	0	0.1	0	0.07	0	0.03	0	0.09	0.05	0.03	0.16	0.11	0.01	0.05	0.06	0.05	0.32	0.35	0.19	0.37	0.26	0.13	0.03	0.16	0.09	0.24	0.05	0.22	0.31	0.13	0.04	0.07	0.07	0	0.03	0	0	0.23	0.22	0.16	0.13	0.14	0.25	0.19	0.05	0.12
XLOC_002990	0	0.05	0.02	0	0.04	0.09	0	0.01	0.02	0.07	0.03	0.11	0.09	0.08	0.02	0.02	0.22	0.15	0.11	0.24	0.17	0.14	0.26	0.26	0.18	0.05	0.01	0.08	0.01	0.11	0.23	0.17	0.17	0.19	0.05	0	0.05	0	0.05	0.01	0.24	0.4	0.12	0.25	0.44	0.4	0.2	0.6	0.25
XLOC_002993	0.84	0.46	0.38	0.54	0.5	0.39	0.58	0.25	0.16	0.44	0.34	0.29	0.4	0.51	0.32	0.34	0.14	0	0.05	0.12	0.07	0.06	0.02	0.13	0.03	0.11	0.06	0.09	0.36	0.11	0	0.05	0.05	0.36	0.14	0.27	0.5	0.29	0.09	0.03	0.18	0.07	0.13	0.18	0.06	0.08	0.07	0.03	0.11
XLOC_002997	2.12	3.22	1.54	2.53	2.46	1.88	1.95	1.38	6.5	7.36	4.66	6.33	8.92	7.16	4.02	4.19	5.68	4.66	2.9	3.09	5.88	5.08	2.95	2.91	5.74	7.24	2.39	4.59	7.45	5.7	4.02	2.15	5.62	8.23	6.38	6.57	10.13	5.88	4.78	4.52	3.51	2.36	0.89	1.73	3.18	2.45	1.46	1.45	4.81
XLOC_003003	0.16	0	0.06	0	0.16	0.07	0	0	0.1	0.34	0.17	0.34	0.26	0.18	0.13	0.14	0.06	0	0.08	0.08	0.07	0.1	0	0	0.18	0.09	0.36	0.34	0.61	0	0	0	0.06	0.3	0.15	0.48	0.42	0.08	0.47	0	0.09	0	0	0.29	0.34	0.39	0.06	0	0
XLOC_003004	0	0	0	0	0	0	0	0	0.24	0.18	0.2	0.43	0.09	0.13	0.05	0.01	0.64	0.85	0.24	0.6	0.1	0.03	0.08	0.05	0.86	1.67	0.51	1	0.2	0.14	0.03	0.07	0.34	0.39	0.48	0.69	0.13	0.2	0.1	0.22	0.3	0.31	0.2	0.14	0.18	0	0	0.06	0.65
XLOC_003017	0	0	0	0	0	0	0	0	0.29	0.15	0.77	0	0.02	0	0	0.01	2.51	2.3	2.58	1.82	1.76	1.01	1.13	3.29	1.52	2.37	0.58	1.59	1.34	0.4	1.47	3.21	1.07	2.14	0.74	0	0.03	0.23	0.45	0.31	2.27	5.13	2.23	2.7	4.32	0.69	1.58	6.14	1.36
XLOC_003018	0	0	0.17	0.05	0.03	0.03	0.05	0.03	0.73	0.97	0.47	0.61	0.47	1.31	0.98	0.35	0	0	0.09	0.06	0	0	0	0	0	0	0	0	0.05	0	0.03	0	0.21	0.19	0.49	0.4	0.62	1.44	1.24	0.13	0	0.05	0	0	0	0	0.04	0	0
XLOC_003019	0	0.03	0	0.03	0	0	0	0	0.05	0.11	0.13	0.02	0.23	0.19	0.09	0	0.18	0.2	0	0.12	0	0.21	0	0.22	0.19	0.26	0.28	0.11	0	0.05	0.23	0.05	0.18	0.16	0.16	0	0	0	0.1	0	0.09	0.37	0.19	0.11	0.25	0	0.37	0.26	0.24
XLOC_003021	0	0	0	0	0	0	0	0	0.14	0.24	0.19	0.02	0	0.02	0.06	0.1	0.19	0.17	0.19	0.11	0.48	0.34	0.33	0.37	0.15	0.15	0.14	0.04	0.06	0.37	0.09	0.06	0.2	0.14	0.21	0.09	0.26	0.31	0.09	0.34	0	0	0.01	0	0.07	0	0.01	0.03	0
XLOC_003025	0	0.04	0	0	0	0.03	0.05	0	0.03	0.24	0.14	0.13	0.06	0.12	0.19	0.09	0.12	0.06	0.13	0.02	0	0.02	0	0.03	0	0.08	0.06	0.08	0	0	0.11	0.07	0.01	0.04	0.02	0.04	0	0	0.06	0	0.02	0.02	0	0.02	0.03	0	0.05	0.05	0.1
XLOC_003028	0	0	0	0	0	0	0	0	0.07	0.53	0.96	0.06	0.1	0.1	0.03	0.03	0.21	0.18	0.12	0.12	0.27	0.15	0.1	0.15	0.34	0.3	0.24	0.25	0.52	0.14	0.29	0.04	0.04	1.06	0.62	0.23	0	0.31	0.14	0	0.3	0.52	0.64	0.09	0.04	0.11	0.28	0.24	0.07
XLOC_003029	0	0	0	0	0	0	0	0	0	0	0.01	0.03	0	0	0.01	0	0.52	0.25	0	0.39	0.18	0.06	0.14	0.26	0.13	0.11	0.07	0.46	0	0	0.32	0.14	0.05	0.06	0	0.1	0.02	0.1	0.03	0.11	0	0	0	0	0	0	0	0	0.2
XLOC_003032	0.04	0.17	0.09	0.03	0	0.24	0.08	0.19	0.35	0.13	0.1	0	0.02	0.08	0.11	0.05	0.08	0.15	0.22	0.33	0.15	0.31	0.41	0.24	0.12	0.01	0.06	0.18	0.17	0.11	0.24	0.09	0.06	0.08	0.14	0.1	0.11	0.13	0.15	0.12	0.23	0.16	0.43	0.56	0.18	0.87	0.39	0.29	0.19
XLOC_003036	0	0.02	0.3	0.05	0.09	0.05	0.08	0.18	0.19	0.12	0.2	0.36	0.37	0.15	0.41	0.38	0.25	0.14	0.18	0.17	0.32	0.4	0.33	0.25	0	0.26	0.08	0.03	0.33	0.12	0	0.27	0.11	0.35	0.28	0.09	0	0.06	0.17	0.2	0.11	0.11	0.3	0.19	0.47	0.12	0.28	0.04	0.17
XLOC_003037	0	0.06	0.02	0.02	0	0.34	0.14	0.07	0.04	0.16	0.13	0.22	0.07	0.7	0.14	0.34	0.11	0	0.12	0.24	0.01	0.27	0.21	0.13	0	0.11	0.11	0.26	0.13	0.73	0.36	0.39	0.04	0.19	0.08	0.13	0.02	0.28	0.47	0.18	0.01	0.07	0	0.06	0.04	0.33	0.18	0.24	0.01
XLOC_003038	0.03	0	0.05	0	0	0	0	0	0.2	0.08	0.1	0.04	0.08	0.06	0.08	0.08	0.02	0.21	0.18	0.02	0.07	0.04	0.07	0.07	0.27	0.03	0.27	0.1	0.13	0.09	0.09	0.09	0.24	0.01	0.13	0.05	0.18	0.11	0.24	0.11	0.22	0	0.1	0.02	0.05	0.17	0.04	0.14	0.32
XLOC_003041	0.15	0.35	0.02	0.24	0	0.26	0	0.07	0.31	0.52	0.21	0.32	0.17	0.13	0.4	0.15	0.38	0.39	0.23	0.2	0.3	0.06	0.14	0.13	0.29	0.49	0.03	0.2	0.08	0.34	0.22	0.24	0.41	0.23	0.38	0.42	0.64	0.21	0.41	0.29	0.18	0.32	0.1	0.26	0	0	0.28	0.02	0.35
XLOC_003042	0.07	0.25	0.03	0.07	0.16	0.18	0.05	0.12	0.27	0.67	0.33	0.25	0.12	0.12	0.2	0.21	0.07	0.02	0.27	0.03	0.12	0.12	0.07	0.11	0.07	0.22	0.16	0.17	0.24	0.22	0.17	0.13	0.81	3	1.17	1.73	0.73	1.78	0.32	1.04	0.09	0.25	0.17	0.39	0.12	0.3	0.09	0.15	0.11
XLOC_003043	0.13	0.1	0.18	0.02	0.32	0.2	0	0.09	0.21	0.21	0.23	0.07	0.15	0.3	0.14	0.13	0.14	0.27	0.3	0.12	0.23	0.52	0.04	0.86	0.21	0.3	0.28	0.12	0.25	0.22	0.27	0.39	0.2	0.07	0.75	0.15	0.39	0.44	0.32	0.31	0.12	0.14	0.17	0.25	0.21	0.12	0.32	0.26	0.25
XLOC_003044	0	0	0	0	0	0	0	0.13	0.06	0.13	0	0	0	0	0	0	0	0.07	0	0	0	0.12	0	0	0	0	0	0	0	0.06	0.15	0	0	0	0.22	0	0	0.1	0	0	0	0.08	0	0.34	0.06	0	0	0	0.05
XLOC_003045	0	0	0	0	0	0	0	0	0	0.04	0.04	0	0	0	0	0.3	0	0	0	0	0	0	0	0	0	0	0.04	0	0	0.04	0	0	0	0	0	0	0.13	0.85	0	0.76	0	0	0	0.04	0	0.22	0	0	0
XLOC_003046	4.06	2.87	1.71	2.37	1.56	2.54	2.29	1.58	7.67	8.86	5.04	4.44	2.93	3.55	4.09	3.41	9.61	10.34	5.04	6.14	3.54	4.11	4.65	2.91	10.95	11.37	4.01	5.99	3.76	3.5	5.36	2.88	12.53	12.47	6.77	9.16	7.99	8.58	7.39	7.09	8.45	7.94	3.3	3.71	3.59	3.81	3.77	2.93	9.8
XLOC_003047	0	0.05	0	0.01	0.21	0.07	0.03	0	0.23	0.14	0.15	0.21	0.08	0.28	0.07	0.12	0.26	0.44	0.19	0.32	0.09	0.03	0.24	0.17	0.48	0.23	0.05	0.06	0.25	0.22	0.19	0.08	0.2	0.23	0.07	0.2	0.27	0.29	0.1	0.26	0.15	0.02	0.02	0.01	0.1	0.01	0.01	0.02	0.39
XLOC_003048	0	0	0	0.01	0	0	0	0	0.03	0.02	0.16	0.18	0.24	0.13	0.1	0.12	0.68	0.24	0.6	0.78	0.8	0.52	0.37	0.32	0.54	0.38	0.31	0.23	0.32	0.53	0.16	0.29	0.24	0.19	0.18	0.05	0.14	0.05	0.19	0.07	0.07	0.14	0.07	0.1	0.1	0	0.02	0.09	0.21
XLOC_003049	0	0	0	0	0	0	0	0	0.01	0	0.14	0.01	0.02	0.01	0.07	0.04	0.06	0.18	1.5	0.2	0.18	0.21	0.42	0.23	0.36	0.05	0.72	0.07	0.37	0.01	0.1	0.17	0.1	0	0.08	0	0.07	0.05	0.03	0.04	0.22	0.02	0.27	0.13	0.06	0.16	0.15	0.07	0.14
XLOC_003050	0	0	0	0	0	0	0	0	0.45	0.18	0.22	0.57	1.07	0.99	0.42	0.32	0.09	0.64	0	0.34	0.12	0.05	0.12	0.02	0.24	0.29	0.02	0.01	0.05	0.01	0	0	0.19	0.06	0.1	0.06	0.09	0.11	0.51	0.07	0.55	0.02	0.12	0.12	0.01	0	0.15	0.06	0.27
XLOC_003051	0	0	0	0	0	0	0	0	0.09	0.01	0.11	0.14	0.35	0.35	0.16	0.12	0	0.21	0	0	0	0	0.09	0	0.02	0.01	0	0	0.03	0	0	0	0.1	0.02	0	0.05	0.09	0	0.12	0	0.12	0.01	0.03	0	0.08	0	0	0.07	0.15
XLOC_003057	0.55	0.25	0.84	0.35	1.11	0.34	0.85	1.82	0.67	0.72	0.45	0.53	1.18	0.28	0.85	0.87	0.15	0.21	0.09	0.12	0.6	0.15	0.54	0.49	0.17	0.32	0.41	0.17	1.17	0.35	0.18	0.42	0.6	0.41	0.64	0.66	0.88	0.35	1.06	0.79	0.26	0.22	0.23	0.14	0.43	0.04	0.42	0.4	0.34
XLOC_003058	0	0	0	0	0	0	0	0	0	0.59	0.13	0	0	0	0.04	0.05	0	0.06	0.08	0.08	0.15	0	0	0.21	0	0	0	0.08	0	0	0	0.05	0	0	0.15	0	0	0.08	0	0	0	0	0	0	0	0	0.27	0.44	0
XLOC_003060	0	0	0	0	0	0	0	0	0.03	0.05	0.06	0.06	0.04	0	0.03	0	0.39	0.14	0.16	0.09	0.08	0.09	0.03	0.03	0.18	0.08	0.01	0.03	0	0.1	0.2	0	0.03	0.1	0.02	0.02	0	0.07	0	0.06	0.14	0.11	0	0.02	0	0	0	0	0.1
XLOC_003068	0	0	0	0	0	0	0	0	0	0	0	0	0	0	0.01	0	0.3	0.11	0	0	0	0	0	0.02	0.06	0.04	0	0	0	0	0	0	0.05	0.08	0	0	0	0	0	0	0	0	0	0	0	0	0	0	0.02
XLOC_003069	0	0	0.01	0	0	0	0	0	0.08	0.02	0.13	0.07	0.03	0.14	0.04	0.01	0.3	0.75	0.56	0.81	0.79	0.56	0.63	0.33	0.71	0.22	0.48	0.83	0.68	0.39	0.56	0.12	0.36	0.17	0.14	0.04	0.02	0.17	0.04	0.02	1.38	0.94	0.45	0.62	0.87	0.68	0.63	0.27	0.85
XLOC_003070	0	0	0	0	0	0	0	0	0	0.02	0.09	0.06	0.02	0.01	0.02	0.02	0.12	0.39	0.26	0.42	0.29	0.7	0.4	0.35	0.2	0.24	0.11	0.33	0.27	0.14	0.39	0.22	0.12	0.08	0	0	0	0.04	0.04	0	0.49	0.69	0.19	0.23	0.15	0.72	0.19	0.1	0.4
XLOC_003071	0	0	0	0	0	0	0	0.01	0.03	0	0.11	0.05	0.03	0.07	0.03	0.06	0.42	0.17	0.37	0.47	0.25	0.29	0.05	0.42	0.1	0.31	0.08	0.19	0.05	0.08	0.05	0.07	0.22	0.22	0.09	0.12	0	0	0.11	0	0.31	0.34	0.29	0.4	0.5	0.27	0.05	0.18	0.32
XLOC_003072	0	0.01	0.01	0.02	0.02	0.01	0.01	0	0.09	0.06	0.48	0.13	0.11	0.11	0.08	0.21	1.42	0.97	0.89	1.11	0.93	0.94	1	0.93	0.75	0.86	0.76	0.92	0.75	0.79	0.56	0.56	0.58	0.75	0.3	0.18	0.15	0.26	0.27	0.17	0.74	0.93	0.6	0.63	0.67	0.56	0.42	0.47	0.82
XLOC_003073	0	0	0.04	0.05	0	0	0	0	0.03	0.12	0.11	0.08	0.07	0.05	0	0.02	0.31	0.58	0.1	0.16	0.17	0.21	0.24	0.29	0.51	0.17	0.11	0.14	0.08	0.09	0.17	0.03	0.42	0.24	0.05	0.03	0.05	0.17	0.05	0.03	0.39	0.12	0.03	0.09	0.18	0.07	0.22	0.02	0.28
XLOC_003075	0	0	0	0	0	0	0	0	0	0	0	0.03	0.02	0	0.04	0	0.25	0.1	0.26	0.35	0.15	0	0.08	0.22	0.11	0.19	0.24	0.27	0	0.02	0	0.02	0.26	0.12	0.06	0	0	0	0	0	0.09	0.05	0	0	0	0	0.04	0	0.04
XLOC_003076	0.06	0	0.09	0	0.19	0.06	0.06	0	0.04	0.07	0.73	0.24	0.38	0.29	0.21	0.15	0.14	0.3	0.19	0.12	0	0.23	0.31	0.11	0.39	0.21	0.32	0.07	0.08	0.08	0.07	0.08	0.32	0.24	0.18	0.38	0.66	0.2	0	0	0.07	0.11	0.04	0.16	0.53	0.04	0.61	0.04	0
XLOC_003078	0	0.03	0.14	0.07	0	0	0.17	0.04	0.06	0.05	0.1	0.1	0.03	0	0	0.36	0	0	0.19	0	0	0	0	0.2	0	0	0	0	0	0	0	0	0	0	0.31	0.28	0	0	0	0.64	0	0	0	0.1	0	0	0.06	0	0
XLOC_003079	0.04	0	0.02	0	0.01	0	0	0.01	0.03	0	0.01	0	0.01	0	0	0.01	0.13	0.65	0.19	0.15	0.12	0.14	0.06	0.1	0.8	0.26	0.48	0.21	0.13	0.38	0.37	0.36	0.03	0.04	0.04	0	0.01	0	0.01	0.01	0.03	0.03	0.08	0.1	0.01	0.04	0	0.03	0.05
XLOC_003082	0.56	0.58	0.52	0.44	0.64	0.98	0.54	0.68	0.18	0.18	0.13	0.06	0.4	0.76	0.32	0.35	0.2	0.18	0.18	0.04	0.22	0.44	0.2	0.38	0.3	0.21	0.33	0.16	0.25	0.43	0.07	0.18	0.34	0.35	0.14	0.15	0.13	0.3	0.23	0.09	0.62	0.19	0.21	0.17	0.36	0.21	0.39	0.37	0.32
XLOC_003087	0.04	0.12	0.04	0.05	0	1.22	0.07	0.02	0.01	0.02	0.03	0.1	0	2.17	0.32	0.15	0.08	0	0.05	0.12	0.04	1.34	0.23	0.14	0.06	0.01	0.07	0.08	0.02	1.95	0.09	0.08	0.11	0.11	0.16	0.21	0.05	1.67	0.42	0.1	0	0	0.06	0.11	0	1.01	0.11	0.07	0.06
XLOC_003088	0	0	0	0	0	0.15	0	0	0	0	0	0	0	0.17	0	0.05	0	0	0	0	0.12	0.05	0	0	0	0.05	0.02	0	0	0.39	0	0	0.03	0.06	0	0.17	0	0.09	0	0.1	0	0.19	0	0.02	0	0.16	0.09	0.15	0
XLOC_003089	0.07	0.3	0.04	0.03	0.03	0.67	0.27	0.21	0	0.07	0.2	0.05	0.01	1.06	0.26	0.16	0.26	0.03	0.07	0.38	0.04	0.64	0.26	0.22	0.02	0.01	0.1	0.14	0.09	0.9	0.07	0.12	0.17	0.11	0.17	0.1	0.06	0.99	0.23	0.13	0.02	0.05	0.1	0.2	0.02	0.98	0.36	0.13	0.07
XLOC_003094	0	0	0.02	0	0.05	0	0	0	0	0	0.1	0.01	0	0	0.06	0.07	0.03	0.07	0.05	0.02	0.02	0	0.05	0.02	0	0	0.08	0	0.06	0.01	0	0.03	0	0.07	0	0.05	0.1	0	0	0	0.05	0.01	0.13	0.14	0.4	0	0.09	0.02	0
XLOC_003098	0	0	0	0	0.08	0	0	0	0	0.02	0.28	0	0.07	0	0.12	0	0.06	0	0.21	0.04	0.11	0	0	0.25	0.02	0	0.05	0	0.16	0.15	0	0	0.03	0.06	0.08	0	0.07	0	0	0	0.19	0	0	0.08	0.22	0	0	0.11	0.52
XLOC_003099	0	0	0	0	0	0	0	0.05	0	0	0.06	0	0	0.03	0	0.03	0.1	0.02	0.17	0.05	0.35	0.14	0	0	0.03	0.11	0.02	0	0	0.1	0	0	0	0.04	0.05	0.05	0	0	0.13	0	0.14	0.18	0.11	0.1	0.03	0.03	0.11	0.09	0.16
XLOC_003100	0	0.02	0.11	0.1	0	0	0.03	0	0.03	0.03	0.26	0.27	0.11	0.06	0.15	0.1	0.08	0.16	0.34	0.14	0.08	0.19	0.27	0.18	0.07	0.14	0.16	0.13	0.12	0.28	0.26	0.3	0.03	0.08	0.2	0.14	0.11	0.09	0.35	0.16	0.09	0.41	0.36	0.2	0.11	0.16	0.18	0.12	0.02
XLOC_003105	0	0	0.07	0.12	0	0.08	0	0.07	0	0	0.03	0	0.01	0.03	0.05	0.01	0.05	0.06	0.07	0.12	0	0	0.2	0	0	0.03	0.1	0.04	0.03	0.15	0.04	0.03	0.04	0	0.07	0	0.17	0.36	0	0	0.03	0.08	0.34	0.12	0.04	0.09	0.23	0.18	0
XLOC_003106	0	0	0	0	0	0	0	0	0	0	0.03	0	0	0	0	0.08	0.17	0.19	0	0	0	0.12	0	0	0.54	0.43	0	0	0	0	0.05	0	0.21	0	0.36	0.28	0	0	0	0	0.19	0.08	0	0	0	0	0	0.03	0.33
XLOC_003108	0	0.02	0	0	0.05	0	0	0	0.09	0.25	0.03	0.27	0.61	0.45	0.34	0.51	0	0.04	0.1	0.02	0.04	0	0	0.11	0.01	0.08	0.01	0.01	0.09	0.04	0	0.09	0.05	0.04	0	0.12	0.15	0.05	0.14	0.19	0.08	0.01	0.03	0	0.04	0.01	0	0.15	0.06
XLOC_003111	0	0	0	0	0	0	0	0	0.5	0	0	0	0	0	0.11	0	0	0	0	0	0	0	0	0	0.07	0	0	0	0	0	0	0	0	0	0	0	0	0	0	0	0	0	0	0	0	0	0	0	0
XLOC_003115	0	0	0.04	0	0	0	0	0	0	0	0.03	0	0.03	0	0	0.03	0.33	0.59	0.05	0	0.09	0	0.37	0.26	0.17	0.34	0.09	0.19	0.7	0	0	0.09	0	0	0	0	0.09	0	0.12	0.12	0	0	0	0	0.12	0	0	0	0
XLOC_003116	0	0	0	0	0	0	0	0	0.07	0	0	0	0.09	0	0.03	0.1	0	0.44	0.12	0.11	0	0.35	0.32	0.39	0.61	0.34	0.19	0.12	0.14	0	0	0.11	0	0	0	0	0	0	0	0.32	0	0	0	0	0	0	0	0	0.19
XLOC_003121	0.13	0.26	0.1	0.11	0.15	0.19	0.31	0.36	0.29	0.09	0.06	0.14	0.24	0.13	0.07	0.22	0.1	0.33	0.35	0.29	0.22	0.34	0.39	0.24	0.32	0.42	0.02	0.12	0.16	0.61	0.49	0.12	0.13	0.07	0.06	0.26	0.17	0.17	0.34	0.27	0.24	0.2	0.07	0.22	0.41	0.24	0.37	0.1	0.3
XLOC_003126	0.18	0.19	0.08	0.15	0.21	0.24	0.11	0.12	0.07	0.13	0.06	0.01	0.04	0.02	0.08	0.02	0.1	0.14	0.2	0.36	0.05	0.12	0.19	0	0.19	0.1	0.04	0.1	0.13	0.36	0.13	0.07	0.13	0.03	0.24	0.1	0.13	0.22	0.18	0.22	0.24	0.15	0.11	0.12	0.19	0.07	0.11	0.09	0.2
XLOC_003128	0.33	0.01	0.06	0.31	0.11	0.21	0	0.04	0.13	0.02	0.01	0	0.06	0.04	0.17	0.05	0.02	0	0	0	0.08	0.03	0.05	0.02	0.04	0	0.04	0	0.09	0.03	0.09	0.03	0.06	0.06	0.14	0.04	0.15	0.54	0.08	0.15	0.05	0	0	0.01	0.05	0.04	0.15	0.03	0.02
XLOC_003129	0.1	0.16	0.17	0.15	0.05	0.38	0	0.34	0.17	0.08	0	0.08	0.05	0.05	0.03	0	0	0.04	0.05	0	0	0	0.04	0.33	0	0.16	0.35	0.03	0	0	0	0.12	0	0.14	0.05	0.1	0.25	0.1	0	0	0	0.05	0.05	0.02	0	0	0.13	0.16	0
XLOC_003133	0	0.13	0.27	0.2	0	0.11	0.34	0	0.07	0.13	0.16	0.26	0.3	0.21	0.17	0.25	0.18	0.05	0.06	0	0.06	0	0.05	0.7	0	0	0	0	0.04	0	0.07	0.15	0.18	0	0	0.37	0.05	0.26	0.14	0.14	0.07	0.14	0.07	0.19	0.74	0.49	0.17	0.13	0
XLOC_003141	0	0	0.04	0	0	0	0	0	0	0	0	0	0.03	0	0	0	0.04	0.05	0.12	0	0	0	0	0	0	0	0.47	0	0	0	0.65	0	0	0.04	0	0.12	0	0	0	0	0.07	0.03	0.03	0	0	0	0.12	0	0
XLOC_003142	0.18	0.12	0.46	0.42	0.87	0.46	0.1	0.16	0.08	0.22	0.02	0.06	0.06	0.22	0.04	0	0	0.03	0	0.14	0.03	0.09	0.11	0	0.04	0.14	0.04	0	0.22	0	0	0.09	0	0.03	0.13	0.21	0	0.04	0.04	0.08	0	0	0.08	0.02	0.04	0.79	0.05	0.02	0.04
XLOC_003143	0.01	0.05	0.18	0.02	0.12	0.03	0.03	0.04	0.23	0.07	0.41	0.3	0.16	0.16	0.1	0.16	0.49	0.44	0.52	0.5	0.32	0.39	0.2	0.17	0.29	0.5	0.29	0.38	0.17	0.13	0.23	0.19	0.31	0.38	0.6	0.29	0.5	0.42	0.24	0.32	0.05	0.26	0.34	0.06	0.09	0.03	0.12	0.13	0.27
XLOC_003146	0.09	0.22	0.03	0.09	0.18	0.18	0.15	0.18	0.13	0.24	0.12	0.22	0.25	0.54	0.08	0.2	0.5	0.18	0.14	0.04	0.41	0.3	0.25	0.14	0.29	0.7	0.19	0.15	0.53	0.34	0.12	0.31	0.08	0.46	0.15	0.13	0.1	0.05	0.21	0.23	0.24	0.39	0.19	0.31	0.27	0.55	0.28	0.03	0.33
XLOC_003150	0.65	0.64	0.72	0.89	0.66	0.57	0.53	0.93	0.03	0.05	0.04	0.05	0.03	0.03	0.03	0.11	0.04	0.11	0.09	0.09	0.05	0.08	0.03	0.11	0.05	0.09	0.07	0.07	0.08	0.08	0.02	0.15	0.07	0.02	0.01	0	0.06	0.03	0.03	0.11	0.05	0.07	0.1	0.09	0.04	0.09	0.08	0.12	0.03
XLOC_003152	0	0	0	0	0	0.03	0.11	0	0.34	0.15	0	0.05	0	0.03	0.07	0.23	0	0	0	0	0	0.07	0.1	0	0	0	0	0	0	0	0	0.09	0	0	0.11	0.06	0.05	0.06	0.07	0.14	0	0	0	0	0	0	0	0.06	0.03
XLOC_003157	0.04	0	0.07	0	0.11	0.05	0.11	0.02	0.08	0.13	0.22	0.2	0.24	0.18	0.05	0.19	0.1	0.04	0.16	0.17	0.28	0.24	0.08	0.2	0.12	0	0.15	0.08	0.1	0.42	0	0.2	0.14	0.04	0.09	0.13	0.2	0.2	0.56	0.17	0.06	0.07	0.09	0.27	0.18	0.38	0.2	0.26	0.09
XLOC_003158	0.07	0.02	0.09	0.02	0.01	0.03	0.05	0.01	0.16	0.21	0.22	0.16	0.15	0.47	0.22	0.26	0.27	0.13	0.07	0.02	0.09	0.06	0.15	0.21	0.11	0.27	0.05	0.08	0.07	0.05	0.1	0.07	0.26	0.21	0.2	0.11	0.04	0.24	0.17	0.31	0.16	0.19	0.07	0.05	0.01	0.05	0	0.1	0.15
XLOC_003160	0.16	0.3	0.37	0.59	0.34	0.13	0.19	0.23	0.32	0.39	0.26	0.31	0.52	0.55	0.62	0.46	0.27	0.19	0.17	0.38	0.27	0.19	0.24	0.31	0.22	0.28	0.38	0.31	0.16	0.32	0.04	0.2	0.34	0.23	0.02	0.12	0.1	0.16	0.31	0.21	0.21	0.35	0.29	0.3	0.46	0.3	0.56	0.16	0.2
XLOC_003166	0	0	0	0	0	0	0	0	0.02	0.05	0.05	0	0.02	0	0	0	0	0	0	0.06	0	0.04	0	0	0	0	0	0.03	0.02	0.03	0	0	0	0.09	0	0	0.03	0	0	0	0.03	0.32	0.18	0	0.21	0.05	0.3	0.06	0.3
XLOC_003169	0	0.05	0.02	0	0	0	0	0	0	0	0.11	0.11	0.17	0.39	0.04	0.02	0.05	0	0.07	0	0.12	0	0.05	0	0	0.02	0	0.04	0	0.04	0	0	0	0.05	0.1	0	0.27	0.04	0.08	0.16	0.19	0	0.1	0.1	0.04	0	0	0	0
XLOC_003171	0.05	0.15	0.03	0.04	0.03	0.03	0.04	0.1	0.06	0.08	0.16	0.01	0.12	0.04	0.02	0.15	0.08	0.05	0.05	0.09	0.07	0.11	0.1	0.03	0.09	0.23	0.11	0.09	0.06	0.08	0.03	0.06	0.05	0.07	0.07	0.08	0.08	0.31	0.07	0.21	0.01	0.02	0.25	0.06	0.12	0.05	0.12	0.04	0.09
XLOC_003172	0.02	0.34	0.09	0.03	0.02	0.06	0	0	0.03	0.2	0	0.05	0.06	0.04	0.05	0.06	0.11	0	0	0.02	0	0.04	0.04	0.03	0	0.14	0.03	0.03	0.13	0	0	0.02	0.01	0.28	0.07	0	0	0.18	0	0.06	0	0.4	0.02	0.02	0.03	0.06	0	0.01	0
XLOC_003174	0	0	0	0	0	0	0	0	0.1	0.11	0.16	0.34	0.07	0.29	0.26	0.05	0.28	0.23	0.17	0.21	0.16	0.1	0.2	0.26	0.51	0.4	0.07	0.87	0.19	0.49	0.35	0.71	0.22	0.41	0.04	0.21	0.37	0.27	0.2	0.1	0.52	0.68	0	0.06	0.33	0.16	0.29	0.15	0.34
XLOC_003176	0.29	0.1	0.21	0.08	0.05	0.08	0.18	0.09	0.23	0.08	0.13	0.03	0.24	0.11	0.11	0.03	0.17	0.04	0.15	0.1	0	0.24	0.04	0.21	0.41	0.24	0.52	0.08	0.3	0.09	0.24	0.06	0.14	0.51	0.46	0.14	0.17	0.25	0.51	0.44	0.11	0.05	0	0.15	0.09	0.09	0.56	0.07	0
XLOC_003180	0.04	0.15	0.05	0.1	0.02	0.03	0.05	0.08	0.06	0.05	0.08	0.11	0.19	0.03	0.06	0.05	0.19	0.1	0.11	0.18	0.25	0.09	0.17	0.2	0.18	0.07	0.17	0.02	0.26	0.04	0.09	0.09	0.17	0.05	0	0.02	0	0.08	0.08	0.02	0.21	0.15	0.15	0.05	0.24	0.02	0.21	0.11	0.08
XLOC_003181	0.14	0.21	0.37	0.11	0.65	0.09	0.13	0.43	0.35	0.11	0.14	0.07	0.07	0.18	0.06	0.16	0.2	0.29	0.07	0.1	0.06	0	0.22	0.36	0.39	0.02	0	0.4	0	0.14	0	0.23	0.15	0.15	0.06	0.27	0	0.14	0.08	0	0.19	0.17	0.14	0.26	0.33	0.31	0.05	0.38	0.23
XLOC_003183	0.14	0.11	0.12	0.14	0.31	0.09	0.1	0.31	0.09	0.11	0.14	0.11	0.15	0.12	0.08	0.28	0.09	0.04	0.07	0.03	0.18	0.1	0.12	0.23	0.14	0.03	0.07	0.05	0.15	0.12	0.1	0.08	0.08	0.07	0.06	0	0.05	0.08	0.08	0.05	0.11	0.08	0.15	0.11	0.27	0.09	0.14	0.16	0.02
XLOC_003186	0.03	0	0	0.21	0	0	0	0.03	0.08	0.05	0.1	0.14	0.05	0	0	0	0	0.05	0.03	0.07	0	0	0.03	0	0.04	0	0	0.23	0	0	0	0	0	0	0	0.26	0.17	0.03	0	0	0.02	0	0.08	0	0	0	0.09	0	0.04
XLOC_003190	0	0	0	0	0	0	0.25	0	0.03	0.03	0.14	0.06	0	0.09	0.12	0.09	0.08	0.12	0.05	0.05	0.15	0.13	0.13	0.14	0.15	0.03	0.18	0.03	0.2	0.67	0.43	0.69	0.31	0.04	0.4	0	0	0.11	0.06	1.03	0.06	0	0.12	0	0.06	0.06	0.15	0.04	0
XLOC_003191	0	0	0	0	0	0.03	0	0	0.13	0.04	0.01	0.02	0.05	0.21	0	0.01	0	0	0	0	0	0	0	0.03	0	0	0	0	0	0	0	0	0	0.02	0	0	0	0	0	0.02	0	0	0	0	0	0	0	0	0
XLOC_003197	0	0	0	0.27	0	0	0	0	0	0	0	0	0	0	0	0	0.08	0.13	0	0	0	0	0	0.1	0.66	0.15	0.06	0	0.07	0.03	0	0	0.12	0	0	0	0	0	0	0	0.44	0.34	0.32	0.09	0.2	0.1	0	0	0
XLOC_003200	0	0	0.18	0	0.16	0	0	0	0.38	0.21	0.13	0.34	0.26	0.46	0	0.52	0.64	0.56	1.15	0.4	1.32	1.18	0.06	0.42	1.37	0.4	0.73	0.42	0.61	1.45	0.48	1.15	1.47	1.02	0.08	0.56	0.77	0.84	0	0	1.12	0.89	1.05	1.52	2.55	1.03	0.33	0.94	1.37
XLOC_003203	0	0	0	0	0	0	0	0	0	0	0	0	0	0	0	0	0	0	0	0	0	0	0	0	0	0	0	0	0.04	0	0	0	0.18	0.05	0	0	0	0	0	0	0	0	0	0	0	0	0	0	0
XLOC_003205	0	0	0	0	0	0	0	0	0.04	0	0	0	0	0	0	0	0.12	0.18	0.37	0.06	0.09	0.53	0.13	0.26	0.04	0	0.39	0.24	0.29	0.2	0.12	0.33	0.22	0.2	0	0	0	0	0	0.04	0	0.09	0	0.1	0	0	0	0	0.15
XLOC_003208	0	0.04	0	0.01	0	0.02	0.03	0	0.06	0.12	0.05	0.05	0.08	0.07	0.05	0.04	0.05	0.17	0.08	0.02	0.02	0.02	0	0.02	0.08	0	0.01	0.06	0.19	0.06	0.08	0.08	0.27	0.06	0.07	0	0.1	0	0.04	0.09	0.05	0.09	0	0.06	0	0.09	0	0.01	0
XLOC_003215	0	0	0	0	0	0	0	0	0	0	0	0.32	0.13	0.1	0.07	0	0.04	0	0.06	0.06	0	0.07	0	0	0	0.07	0.17	0	0	0.18	0	0	0	0	0.11	0	0.05	0	0	0	0	0	0	0.09	0	0	0	0.12	0
XLOC_003224	0	0.05	0	0	0	0.07	0.15	0	0.05	0	0.13	0.51	0.04	0.27	0.49	0.09	0.06	0	0.08	0	0	0.1	0	0	0.09	0	0.32	0	0	0.1	0	0.05	0	0.24	0.45	0.08	0.28	0.25	0.28	0.36	0	0	0	0.16	0	0	0	0.05	0
XLOC_003226	0.03	0.03	0.07	0.08	0	0.07	0.09	0.15	0.18	0.23	0.27	0.25	0.58	0.66	0.46	0.44	0.27	0.2	0.21	0.37	0.13	0.33	0.13	0.36	0.15	0.18	0.36	0.32	0.29	0.37	0.02	0.13	0.31	0.25	0.26	0.19	0.24	0.36	0.49	0.48	0.23	0.11	0.07	0.11	0.14	0.21	0.05	0.08	0.2
XLOC_003236	0	0	0	0	0	0	0	0	0.17	0.26	0.04	0.19	0.04	0.04	0	0.04	0	0	0	0	0	0	0	0	0.35	0.42	0	0	0	0	0	0	0	0	0	0	0.06	0	0	0	0	0.19	0	0	0	0	0	0.38	0
XLOC_003237	0.18	0	0.02	0.02	0.1	0.05	0	0.02	0.11	0.07	0	0.17	0.14	0.16	0.1	0.06	0.04	0.06	0.03	0.1	0.12	0.03	0.08	0.22	0.09	0.06	0.06	0.19	0.16	0.2	0.04	0.03	0.09	0.23	0.17	0	0	0.05	0.06	0.18	0.32	0.23	0	0.05	0.12	0.03	0.11	0.04	0.15
XLOC_003238	0.68	1.12	0.59	0.24	0.35	0.73	0.57	0.46	0.18	0.17	0.21	0.03	0.25	0.22	0.06	0.11	0.31	0.34	0.25	0.29	0.07	0.26	0.15	0.21	0	0.03	0	0.11	0.1	0.06	0.12	0.07	0.24	0.52	0.08	0.08	0.02	0.08	0.09	0.06	0.21	0.4	0.09	0.55	0.32	0.25	0.18	0.28	0.09
XLOC_003239	0	0.07	0.18	0	0.05	0.08	0.18	0.17	0.09	0.03	0.03	0.03	0.05	0.06	0.11	0.11	0.07	0.04	0.1	0.05	0	0.06	0	0.29	0.11	0	0.05	0	0	0	0.16	0.15	0.04	0	0.14	0	0	0	0	0.28	0.08	0.03	0.27	0.44	0.23	0.56	0.17	0.1	0
XLOC_003240	0.09	0.14	0.17	0.03	0.58	0.32	0.95	0.13	0.22	0.33	0.34	0.13	1.15	0.51	0.79	0.29	0.43	0.14	0.1	0.01	0.27	0.09	0.44	0.22	0.18	0.13	0.13	0.17	0.31	0.11	0.21	0.02	0.17	0.2	0.1	0.08	0.24	0.13	0.87	0.1	0.33	0.31	0.13	0.14	0.18	0.16	0.51	0.14	0.15
XLOC_003242	1.81	1.06	3.39	1.86	0.39	1.08	0.94	0.97	0.41	0.45	1.47	0.41	0.55	1.15	0.52	1.04	1.01	0.79	0.71	0.38	0.64	0.76	0.12	0.67	0.79	0.77	1.41	0.61	0.59	0.66	0.8	0.24	0.34	0.58	0.73	0.92	0.67	0	0.45	0.27	0.82	1.38	1.1	0.47	0.65	0.52	0.48	0.32	0.53
XLOC_003244	0.39	0.17	0.12	0.39	0.29	0.4	0.29	0.19	0.03	0.09	0.08	0.12	0.18	0.03	0	0.21	0.12	0.04	0	0.14	0.04	0.09	0.06	0.17	0.15	0	0	0.03	0.15	0.06	0.1	0.18	0.14	0.14	0.02	0.02	0	0.08	0.14	0	0.2	0.03	0.3	0	0.04	0.12	0.13	0.1	0.08
XLOC_003254	0.06	0	0	0	0.05	0.14	0	0.17	0.03	0	0	0	0.08	0	0.03	0	0.04	0.06	0.51	0.03	1.04	0.41	0	0.86	0	0	0.71	0	0.9	0.13	0.12	0.51	0.04	0.06	0.26	0	0.07	0	0.06	0.19	0	0.02	0.19	0	0.07	0	0	0.09	0
XLOC_003258	0	0	0	0	0	0	0	0	0.08	0.03	0.05	0.03	0.04	0	0	0.02	0.3	0.2	0.1	0.09	0	0.32	0	0	0.4	0	0	0.02	0	0.08	0	0.1	0	0.12	0.03	0	0.14	0	0	0.15	0.07	0.07	0.11	0.18	0.08	0	0.13	0.13	0.07
XLOC_003265	0.05	0	0.05	0	0	0	0	0	0.04	0.01	0.1	0.04	0.02	0.01	0.08	0.04	0.06	0.05	0.21	0	0.08	0	0	0.01	0.1	0.02	0.39	0	0	0.04	0.07	0.05	0.4	0.1	0.24	0.02	0.28	0	0.08	0.14	0.4	0.29	1.04	0.14	0.54	0	0.17	0.26	0.17
XLOC_003268	0.29	0.28	0.13	0.52	0.48	0.14	0.33	0.27	0.19	0.12	0.24	0.05	0.03	0.03	0.05	0.11	0.16	0.36	0.12	0.11	0.21	0.08	0.09	0.14	0.14	0.05	0.07	0.05	0.17	0.1	0.17	0.16	0.4	0.11	0.15	0.03	0.13	0.12	0.05	0.08	0.12	0.13	0.5	0.51	0.31	0.23	0.17	0.62	0.2
XLOC_003271	0	0	0	0.3	0	0	0.03	0.03	0.04	0	0	0	0	0	0	0	0	0	0	0.09	0.11	0	0	0	0	0	0	0	0.02	0	0	0	0	0	0	0	0	0	0	0.04	0	0	0	0	0	0	0	0.06	0
XLOC_003272	0.98	1.46	1.31	0.51	0.85	1.06	0.65	1.25	1.17	1.91	1.2	0.89	2.32	2.71	2.36	2.31	0.94	0.17	0.75	0.45	0.72	0.86	0.71	1.24	0.05	0.84	0.55	0.19	0.56	0.9	0.92	0.85	0.65	2	0.52	1.74	0.4	1.46	1.32	1.39	0.36	1.06	0.71	0.54	0.69	1	0.35	0.58	0.66
XLOC_003275	0.08	0.07	0.18	0.05	0.03	0.01	0.02	0.09	0.47	0.22	0.36	0.41	0.41	0.69	0.55	0.35	0.13	0.13	0.37	0.27	0.2	0.11	0.22	0.18	0.18	0.06	0.11	0.07	0.35	0.27	0.32	0.13	0.32	0.21	0.35	0.42	0.16	0.31	0.18	0.23	0.15	0.24	0.03	0.22	0.09	0.13	0.18	0.17	0.12
XLOC_003278	0	0	0	0	0	0	0	0	0.04	0	0.02	0.05	0.02	0	0.03	0	0.48	0.38	0.12	0.1	0.12	0.02	0.12	0.15	0.29	0.23	0.03	0.17	0.09	0.21	0.06	0	0.11	0.26	0.01	0	0	0.03	0.02	0	0.48	0.04	0	0.09	0.07	0.01	0.08	0.01	0.36
XLOC_003279	0	0.07	0	0	0	0	0	0	0.06	0	0.1	0.13	0.29	0.03	0.24	0.45	0	0.04	0	0.05	0.09	0.18	0.04	0.54	0.27	0.03	0	0.13	0.46	0	0.1	0.18	0.07	0.07	0.09	0.05	0.25	0	0.34	0.22	0	0	0.03	0	0	0	0	0.07	0.11
XLOC_003280	0	0.08	0.03	0.07	0.19	0.04	0.02	0.06	0.22	0.14	0.28	0.11	0.09	0.2	0.13	0.38	0.05	0.18	0.1	0.05	0.09	0.03	0.28	0.2	0.03	0.01	0.13	0.02	0.1	0.16	0.08	0.07	0.21	0.09	0.04	0.28	0.06	0	0.25	0.43	0.08	0.05	0	0	0.01	0	0.16	0	0.13
XLOC_003281	0.06	0.15	0.19	0.42	0.18	0.07	0.27	0.25	0.21	0.21	0.27	0.18	0.19	0.24	0.31	0.51	0.01	0.05	0.14	0.19	0.07	0.05	0.16	0.14	0.13	0.23	0.08	0.13	0.11	0.13	0.32	0.13	0.04	0.06	0.37	0.19	0.12	0.23	0.16	0.54	0.16	0.09	0.06	0.24	0.08	0.1	0.11	0.32	0.04
XLOC_003285	0	0	0.07	0.02	0	0	0	0.03	0.13	0.03	0.11	0.28	0.1	0.09	0.22	0.11	0	0.02	0.09	0.06	0.03	0	0	0.08	0.07	0.08	0.05	0.16	0.27	0.02	0	0	0.16	0.09	0.06	0.09	0.05	0.1	0	0.14	0	0	0	0.05	0	0	0.29	0.06	0.03
XLOC_003288	0.51	0.44	0.41	0.5	2.49	2.49	0.46	0.52	0.2	0.17	0.17	0.1	0.6	0.39	0.28	0.16	0.23	0.12	0.2	0.24	0.74	1.05	0.2	0.21	0.08	0.16	0.18	0.13	0.73	0.87	0.1	0.2	0.17	0.24	0.16	0.16	0.33	0.87	0.19	0.15	0.24	0.21	0.38	0.26	1.1	1	0.19	0.23	0.15
XLOC_003290	0	0	0	0	0	0	0.07	0	0.14	0	0	0	0	0	0	0.09	0	0	0	0	0	0	0	0	0.44	0	0	0	0	0	0	0	0	0	0	0	0	0	0	0.09	0	0.04	0.09	0	0	0	0	0	0
XLOC_003291	0.08	0.03	0.06	0.01	0.06	0.08	0.09	0.14	0.14	0.06	0.07	0.17	0.19	0.33	0.25	0.1	0.17	0.23	0.07	0.09	0.12	0.1	0.06	0.11	0.24	0.3	0.07	0.37	0.02	0.03	0.03	0.13	0.34	0.43	0.09	0.14	0.21	0.22	0.09	0.15	0.21	0.12	0.23	0.08	0.02	0.15	0.01	0.05	0.11
XLOC_003292	0.24	0	0.06	0.06	0.08	0	0	0	0	0.26	0	0.09	0.09	0	0	0.09	0.23	0.25	0.16	0.24	0	0.2	0	0	0.09	0	0	0.17	0.25	0.05	0.35	0.25	0.06	0.36	0	0.16	0	0	0.56	0.27	0.45	0.18	0	0.16	0	0.05	0.06	0.06	0
XLOC_003293	0	0	0	0	0	0	0.03	0.07	0.22	0	0	0.2	0.08	0.11	0.04	0.17	0.13	1.12	0	0	0	0	0.06	0.13	0.08	0	0	0.08	0	0	0	0	0.16	0	0.17	0	0	0	0.17	0.25	0.02	0	0	0	0	0	0	0	0.17
XLOC_003294	0.11	0	0	0	0	0.07	0	0	0.31	0.04	0.04	0.1	0.46	0.09	0.06	0.2	0.03	1.09	0	0	0	0	0	0	0.36	0.15	0	0.06	0	0	0	0.05	0.14	0.06	0.11	0	0.13	0.12	0	0	0.19	0.27	0	0	0	0.07	0	0	0.22
XLOC_003297	0	0.08	0.19	0.16	0.62	0.18	0.06	0.27	0.1	0.11	0.17	0.19	0.19	0.1	0.05	0.12	0.36	0.47	0.29	0.44	0.17	0.4	0.28	0.23	0.29	0.08	0.11	0.21	0.08	0.1	0.14	0.25	0.06	0.05	0.02	0.02	0	0.06	0.07	0.05	0.11	0.07	0.09	0.13	0.02	0	0.17	0.07	0.32
XLOC_003301	0	0.03	0	0	0.08	0.23	0	0	0	0.18	0.08	0.06	0.1	0.06	0	0.07	0	0	0	0	0	0.23	0.03	0.13	0	0	0	0	0	0.3	0	0	0	0	0.04	0.07	0.13	0.12	0	0.04	0	0	0	0.08	0.11	0	0	0.13	0
XLOC_003303	0.1	0.07	0.15	0.04	0	0.54	0.24	0.05	0	0.11	0	0.03	0	0.18	0	0	0	0	0.05	0.15	0.05	0.13	0.13	0.04	0	0	0.03	0.08	0	0.09	0.06	0.06	0.04	0.12	0.05	0	0	0.05	0.06	0	0.09	0.14	0.06	0.26	0	0	0.04	0	0
XLOC_003304	0.13	0.09	0	0	0	0	0	0.23	0.05	0	0.02	0.12	0.02	0.02	0.02	0.03	0	0	0	0.21	0	0.05	0.1	0	0	0	0	0.02	0	0.16	0.37	0.19	0	0.06	0.41	0.51	0.23	0.18	0	0.1	0	0	0	0.11	0.28	0	0.03	0	0
XLOC_003305	0.24	0.22	0.71	0.48	0.05	1.22	0.48	0.29	0.28	0.1	0.27	0	0.43	0.75	0.42	0.19	0.34	0	0	0.09	0.04	0.23	0.15	0	0	0.05	0.13	0.32	0	0.39	0	0	0.1	0.24	0	0	0.04	0.1	0.11	0.05	0.03	0.03	0	0.07	0	0.06	0	0.13	0.32
XLOC_003306	0.79	0.64	0.86	0.24	0.83	0.9	0.18	0.04	0.32	0.52	1.31	0.21	0.94	0.28	0.19	0.11	0.89	0.38	0.65	0.19	0.54	0.42	0.99	0.42	0.5	0.3	0.11	0.59	0.9	0.68	0.96	0.21	0.32	0.59	0.6	0.34	0.73	0	0.34	0.39	0.16	0.76	0.89	0.13	1.26	0.54	1.28	0.34	0.45
XLOC_003309	0.07	0.02	0.22	0.16	0.17	0	0.13	0.12	0	0	0.04	0.06	0	0	0	0.24	0.27	0	0.11	0.27	0.28	0.04	0.28	0.06	0	0.17	0.04	0.13	0.32	0	0.26	0.09	0	0.13	0.13	0.27	0	0.07	0.08	0.08	0	0	0.33	0.07	0.74	0	0.02	0.05	0.12
XLOC_003310	0.15	0.17	0.13	0.24	0.4	0.31	0.19	0.54	0.21	0.15	0.22	0.07	0.12	0.16	0.07	0.12	0.09	0.22	0.21	0.17	0.3	0.34	0.2	0.17	0.24	0.17	0.11	0.12	0.73	0.44	0.65	0.23	0.2	0.11	0.09	0.15	0.09	0.05	0.12	0.2	0.24	0.28	0.2	0.24	0.3	0.15	0.03	0.19	0.2
XLOC_003314	1.94	4.12	2.46	4.02	1.6	3.24	3.9	3.4	0	0.02	0.08	0.05	0.02	0.11	0.25	0.26	0.09	0.08	0.15	0.27	0.17	0.21	0.23	0.2	0.17	0.07	0.1	0.15	0.12	0.16	0.05	0.14	0.05	0.09	0	0.05	0.01	0.12	0.15	0.09	0.11	0.07	0.1	0.06	0.16	0.12	0.18	0.18	0.04
XLOC_003316	0	0	0	0	0	0	0	0	0	0	0	0	0	0.04	0	0	0	0	0	0	0	0	0	0	0	0	0	0	0.58	0	0	0	0	0	0	0	0	0	0	0	0	0	0	0	0	0	0	0	0
XLOC_003318	0	0.06	0.16	0.1	0.04	0	0.12	0	0.1	0.11	0.09	0.23	0	0	0	0.22	0	0.03	0.04	0.17	0.04	0	0.1	0.33	0.07	0.21	0.02	0	0.19	0	0.07	0	0.16	0.1	0.04	0.21	0.07	0.22	0.25	0.19	0.02	0.05	0.31	0.26	0.2	0.18	0.44	0.26	0
XLOC_003334	0.14	0.01	0.06	0.23	0.13	0.07	0.06	0.16	0.03	0.04	0.03	0.05	0.02	0.04	0.01	0	0.01	0.08	0.03	0.05	0.08	0	0.03	0.1	0.11	0.07	0.15	0.05	0	0	0.06	0.01	0	0.01	0.08	0.03	0.04	0.07	0.08	0.11	0.01	0.02	0.14	0.3	0.08	0.12	0	0.02	0.04
XLOC_003335	0	0	0	0	0	0	0	0	0	0	0.59	0.2	0.37	0.69	0	0.27	0.18	0	0.56	0.04	0.04	0.05	0.07	0.22	0	0	0.31	0.59	0.24	0	0	0	0	0	0.16	0.12	0.07	0.74	0.39	0.24	0	0	0.09	0.09	0	0.05	0	0	0.38
XLOC_003336	0	0	0	0	0	0.01	0.03	0	0.25	0.22	0.06	0.04	0.08	0.1	0.22	0.14	0.21	0.14	0.03	0.06	0.03	0.08	0.1	0.08	0.23	0.33	0.13	0.04	0.02	0.2	0.13	0.01	0.22	0.29	0.07	0.15	0.03	0.06	0.14	0.09	0.1	0.09	0.01	0.04	0	0.02	0.02	0.07	0.14
XLOC_003337	0.06	0.26	0.64	0.9	0.47	0.42	0.23	0.13	0.02	0.15	0.1	0.1	0.09	0.09	0.05	0.06	0.11	0.05	0.03	0.06	0.01	0.06	0.03	0	0.09	0.04	0.1	0	0.03	0.04	0.08	0.04	0.09	0.16	0.3	0.08	0.03	0.07	0.04	0.09	0	0.02	0.05	0.09	0	0.17	0.04	0.13	0.04
XLOC_003338	0.54	0.77	0.46	0.98	0.59	0.68	0.7	0.56	1.73	1.58	1.43	1.44	0.91	0.97	1.16	1.5	0.88	0.98	1.25	1.6	0.72	1.35	2.32	2.58	0.66	0.68	0.75	1.27	1.34	1.32	1.51	1.52	0.62	1.48	1.66	1.52	1.61	1.77	1.98	1.18	0.44	0.62	2.13	2.16	1.15	0.84	2.88	2.06	0.79
XLOC_003340	0	0.03	0.06	0	0	0	0.12	0.11	0.08	0.02	0.11	0.27	0	0.05	0.05	0.03	0.22	0.07	0.44	0.42	0.04	0.26	0.14	0.48	0.22	0.45	0.36	0.02	0.16	0.03	0.05	0.21	0.13	0.32	0.28	0.17	0	0.09	0.2	0	0.12	0.09	0.07	0	0	0	0.03	0.18	0.2
XLOC_003341	0	0.07	0	0	0	0	0	0	0.03	0	0	0	0	0	0.09	0	0.61	0.53	0.21	0.1	0.62	0.32	0	0.14	0.09	0.12	0.12	0.14	0.33	0.06	0.34	0.29	0	0	0	0	0	0	0	0	0	0.03	0.12	0.03	0	0	0	0	0.12
XLOC_003342	0	0.01	0.04	0	0.02	0.05	0	0	0.09	0.34	0.03	0.2	0.21	0.24	0.16	0.29	0.06	0.11	0.04	0.05	0.1	0.17	0.16	0.11	0	0	0.28	0.04	0.07	0.15	0.07	0.13	0.12	0.03	0.18	0.07	0.22	0.11	0.17	0.4	0	0.1	0.27	0.06	0.21	0.29	0.06	0.3	0.04
XLOC_003343	0	0	0	0	0	0	0	0	0.7	0.29	0.08	0.14	1.05	0.75	0.05	0.54	0.02	0.1	0	0	0.09	0.12	0.13	0.25	0.09	0	0	0	0.06	0.04	0	0	0.35	0.07	0.06	0	0.11	0.4	0	0.33	0.05	0	0.02	0	0.29	0.08	0	0.04	0.29
XLOC_003352	0	0	0	0	0	0	0	0	0	0.02	0	0	0.05	0.08	0.12	0.34	0	0	0	0	0	0	0	0	0	0	0	0.02	0	0	0	0	0	0	0	0.44	0.12	0.05	0.1	0	0	0	0	0	0	0	0	0	0
XLOC_003359	0.01	0	0	0	0.03	0.06	0	0	0.06	0.08	0.2	0.25	0.07	0.04	0.26	0.05	0.73	0.35	0.24	0.15	0.07	0.11	0.08	0.16	0.2	0.04	0.06	0.01	0.04	0	0	0.02	0.16	0.31	0.14	0.04	0.11	0.15	0.31	0	0.3	0.41	0.31	0.19	0.09	0.23	0.04	0.31	0.4
XLOC_003368	0.22	0.15	0.08	0.13	0.11	0.29	0.31	0.15	0.03	0.03	0	0	0.3	0	0.03	0.03	0.16	0	0	0	0	0.41	0	0	0.19	0.12	0	0.03	0	0.1	0	0	0.41	0.08	0	0	0	0	0	0	0.06	0.15	0.03	0	0	0.03	0	0	0.19
XLOC_003369	0.04	0	0	0	0.02	0	0	0	0.11	0.03	0.11	0.04	0.14	0.07	0.06	0.05	0.19	0.03	0.1	0	0.05	0.1	0.21	0.09	0.05	0.07	0.22	0.55	0.14	0.08	0.17	0	0.03	0.06	0	0	0.02	0	0	0.07	0	0.13	0	0.07	0.1	0.02	0.01	0	0.09
XLOC_003372	0.72	1.13	2.24	0.76	1.3	1.59	1.1	1.06	0.59	1.28	1.82	0.46	0.67	0.78	1	0.75	0.23	0.28	1.68	0.35	0.31	0.51	0.72	0.84	0.3	0.4	1.62	0.48	0.86	0.55	0.58	0.42	0.46	0.54	2.15	0.81	1.62	1.29	1.74	1.49	0.14	0.15	0.59	0.4	0.54	0.61	0.34	0.44	0.27
XLOC_003374	0	0	0.03	0	0.09	0.12	0	0	0	0.2	0.32	0	0.2	0.18	0.05	0.24	0	0	0	0	0	0.11	0.15	0	0	0.15	0	0	0	0.03	0.03	0.06	0	0.07	0.09	0	0.44	0	0	0	0.05	0	0.03	0	0	0.45	0	0	0.11
XLOC_003376	0	0	0.1	0.11	0	0.12	0.06	0.06	0.08	0.11	0.24	0.18	0.07	0.11	0.3	0.04	0	0.83	0.14	0.13	0	0.16	0.21	0.06	0.67	0.04	0.11	0.1	0.13	0.04	0.25	0.49	0.24	0.1	0.06	0.13	0.35	1.25	0.39	0.6	0.26	0.18	0.11	0.07	0	0	0.68	0.41	0
XLOC_003377	0.17	0.04	0.05	0.06	0.06	0.01	0.03	0.06	0.4	0.22	0.12	0.15	0.13	0.22	0.19	0.13	0.21	0.47	0.13	0.29	0.06	0.13	0.26	0.09	0.25	0.25	0.06	0.06	0.07	0.11	0.05	0.02	0.31	0.13	0.35	0.46	0.29	0.11	0.38	0.16	0.37	0.06	0.11	0.13	0.03	0.06	0.13	0.05	0.62
XLOC_003383	0	0.05	0	0.09	0	0.03	0	0.51	0	0.06	0.04	0.26	0.23	0.04	0	0.04	0	0.06	0.08	0	0	0.05	0.12	0	0	0	0.35	0.06	0	0	0.02	0.26	0	0	0.14	0.15	0	0	0.13	0	0	0.08	0.04	0.33	1.32	0.09	0.68	0.29	0
XLOC_003391	0.03	0.03	0.01	0.02	0.07	0.04	0.02	0.04	0.12	0.06	0.22	0.06	0.01	0.02	0.03	0.05	0.9	0.87	0.92	1.01	0.7	0.83	0.57	0.51	0.86	0.86	0.81	1.16	0.57	1.08	0.55	0.75	0.19	0.38	0.09	0.14	0.1	0.17	0.18	0.11	0.58	0.36	0.25	0.35	0.46	0.37	0.36	0.36	0.81
XLOC_003393	0	0	0.09	0.05	0	0.1	0	0	0.11	0.16	0.12	0.13	0.03	0.03	0.03	0.07	0.17	0.05	0.12	0.12	0	0.15	0.05	0.2	0.1	0.03	0.34	0.25	0.07	0.04	0.03	0.22	0.09	0.04	0.45	0	0	0.25	0.14	0.61	0.2	0	0.1	0.06	0.28	0.14	0.08	0.32	0
XLOC_003398	0.18	0.33	0.26	0.19	0.06	0.16	0.28	0.6	0.04	0.06	0.21	0	0	0	0.05	0	0.02	0	0	0.15	0.06	0.04	0.02	0.03	0	0	0	0	0	0.02	0	0	0.02	0.02	0.23	0	0.16	0.35	0.14	0.21	0.03	0.02	0.15	0.11	0.13	0.3	0.27	0.19	0
XLOC_003402	0.27	0.15	0.2	0.09	0.43	0.42	0.2	0.1	0.13	0.06	0.11	0.06	0.15	0.19	0.18	0	0.08	0.08	0.22	0.11	0	0.07	0	0.42	0.09	0.06	0.15	0.26	0	0.07	0.26	0.13	0.04	0.2	0.05	0.27	0.61	0	0	0	0.48	0.27	0.43	0.11	0.32	0.3	0.26	0	0.43
XLOC_003405	0	0	0	0.01	0	0	0.03	0	0.01	0	0.04	0.16	0	0	0.01	0	0.2	0.06	0.28	0.32	0.08	0.04	0.09	0.09	0.12	0.04	0.01	0.25	0.42	0.15	0.06	0.17	0.28	0.22	0.02	0.02	0	0.04	0.02	0.04	0.39	0.22	0.13	0.3	0.07	0.06	0	0.06	0.27
XLOC_003406	0.05	0	0	0	0	0	0	0	0.39	0	0	0.03	0.08	0.23	0	0	0	0	0	0	0	0	0	0.09	0	0	0	0	0	0	0	0	0	0	0	0.15	0	0	0	0	0	0.03	0	0	0	0	0	0	0
XLOC_003410	0	0.37	0.14	0.18	0.22	0.14	0.12	0.14	0.06	0.03	0	0	0	0.22	0.14	0.02	0.05	0	0	0	0	0	0	0	0.04	0.12	0.07	0.03	0	0	0.15	0	0	0	0.12	0.06	0	0	0	0.07	0.03	0	0.02	0.08	0.06	0.13	0	0.02	0
XLOC_003413	0	0	0	0	0	0	0	0	0.11	0.16	0	0	0	0	0	0	0	0	0	0	0	0	0	0	0	0	0.03	0	0	0	0	0	0.18	0	0.74	0	0	0	0.14	0	0	0	0	0	0	0	0	0	0
XLOC_003415	0	0	0	0	0	0	0	0	0.32	0.3	0.79	0.25	1.33	0.43	1.49	1.54	0.17	0.06	0.03	0.08	0.07	0.1	0.11	0.17	0.02	0.03	0.04	0	0.14	0.04	0.09	0.11	0.28	0.08	0.51	0.26	1.6	0.61	0.91	1.87	0	0.01	0	0	0.02	0	0.03	0	0
XLOC_003417	0	0.23	1.21	0	0	0.03	0	0.06	0.03	0.08	1.2	0.02	0.05	0	0.04	0.07	0.18	0	0.59	0.02	0.05	0.06	0.08	0.01	0.02	0.04	1.09	0	0.04	0.01	0.01	0	0	0.23	1.22	0.07	0.03	0.12	0.08	0	0	0.1	0.65	0	0	0	0.09	0.08	0
XLOC_003430	0	0	0.08	0.04	0	0	0	0	0	0	0.44	0	0	0.03	0	0	0	0.09	0	0	0	0	0.04	0	0	0	0	0	0	0.13	0	0	0	0	0	0	0	0	0	0	0	0	0	0	0	0	0	0	0
XLOC_003435	0.16	0.21	0.11	0	0.08	0.14	0.07	0.07	0.19	0.04	0.29	0.17	0.17	0.09	0.09	0.28	0.17	0.37	0	0.62	0.22	0.1	0.19	0.41	0	0	0.8	0	0	0.47	0.09	0	0	0.29	0.37	0.7	0	0.16	0	0	0.65	0.22	0.13	0.04	0	0	0	0.16	0.27
XLOC_003437	0.02	0.08	0.03	0.11	0.14	0.07	0	0	0.24	0.12	0.13	0.31	0.11	0.11	0.2	0.16	0.24	0.39	0.57	0.67	0.24	0.54	0.5	0.4	0.25	0.42	0.26	0.53	0.28	0.31	0.15	0.06	0.12	0.27	0.15	0.14	0.22	0.12	0.21	0.11	0.45	0.85	0.1	0.16	0.29	0.41	0.22	0.18	0.41
XLOC_003438	0	0	0	0	0	0	0	0	0	0	0.07	0	0	0	0	0	0.91	0.76	0	0	0.03	0	0	0.06	0.68	0.68	0	0.19	0	0.06	0.05	0	0.62	0.56	0.06	0	0	0	0	0	0.09	0.16	0.04	0.05	0.23	0.04	0	0	0.15
XLOC_003439	0	0	0	0	0	0	0	0	0.04	0.01	0.09	0	0	0	0	0	2.77	0.9	0.11	0.13	0.05	0.07	0.14	0.03	0.76	1.01	0.16	0.19	0.13	0.03	0.03	0.03	0.53	1.13	0.03	0	0	0.01	0.06	0	0.12	0.4	0.07	0	0.03	0.02	0.01	0	0.45
XLOC_003441	0	0	0	0	0	0	0	0.02	0	0	0	0	0	0.41	0	0	0	0	0	0	0	0	0	0	0	0	0	0	0	0	0	0	0	0	0	0	0	0	0	0	0	0	0	0	0	0	0	0	0.03
XLOC_003443	0	0	0	0	0	0	0	0	0	0	0	0	0.04	0	0	0	0	0	0	0.07	0.27	0	0	0	0	0	0	0	0	0.03	0	0	0	0	0	0	0	0	0	0	0	0	0	0	0	0	0	0	0
XLOC_003444	0.02	0	0.02	0.01	0	0.01	0	0.04	0	0.04	0.05	0	0.01	0.07	0.04	0.17	0.06	0.08	0.04	0.03	0.01	0.04	0.23	0.04	0.03	0	0.05	0.05	0.01	0.01	0.22	0.16	0.08	0.05	0	0.07	0.01	0.02	0.03	0	0.06	0.04	0.13	0.01	0.03	0.04	0	0.03	0.05
XLOC_003445	0.01	0.01	0	0	0	0	0	0	0.06	0.04	0.01	0.05	0.01	0.04	0.11	0.06	0.42	0.43	0.1	0.03	0.05	0	0.02	0.07	0.11	0.2	0.06	0.04	0	0.02	0	0	0.28	0.13	0.04	0.2	0.12	0.01	0	0.12	0.23	0.1	0	0.06	0.06	0	0	0.09	0.23
XLOC_003446	0	0	0	0	0	0	0	0	0	0	0	0	0	0	0	0	0.3	0.09	0.12	0	0.1	0	0.09	0.07	0	0.16	0.03	0	0	0.02	0.03	0	0.37	0.02	0	0	0	0	0	0	0	0.02	0	0.01	0	0.14	0	0	0.26
XLOC_003453	0.41	0.44	0.17	0.22	0.2	0	0.48	0.57	0.02	0.13	0	0.13	0.31	0.21	0.13	0.12	0.2	0.16	0	0.08	0	0	0.06	0.31	0	0.11	0	0.27	0.08	0.17	0	0.1	0.09	0	0.04	0.08	0.38	0.08	0.09	0	0.18	0	0.14	0.04	0	0	0	0	0.14
XLOC_003454	0.03	0.14	0.06	0	0.03	0.05	0.03	0.08	0.34	0.18	0.07	0.24	0.37	0.2	0.37	0.48	0.27	0	0.06	0.03	0.34	0	0.16	0.02	0.15	0.28	0.23	0.1	0	0.07	0	0.05	0.33	0.58	0.08	0.34	0	0.06	0.13	0	0.13	0.08	0	0.03	0.02	0.03	0.2	0.23	0.16
XLOC_003456	0	0	0	0	0	0	0	0.26	0	0	0	0	0	0.08	0.04	0.04	0	0	0	0	0	0	0	0	0	0	0	0	0	0	0	0.05	0	0	0.35	0.36	0	0.54	0	1.51	0	0.12	0.04	0	0	0.09	0	0	0
XLOC_003459	1.26	0.72	1.08	1.4	0.7	1.06	0.87	1.15	0.72	0.83	0.47	0.86	1.56	1.41	1.81	1.01	1.1	1.16	0.56	0.81	0.82	1.2	1.04	0.98	1.22	1.26	0.82	0.62	0.44	0.52	0.51	0.44	1.26	1.32	0.55	0.66	0.68	0.98	0.92	0.4	0.72	1.06	0.69	0.36	0.56	0.88	0.7	0.46	1.07
XLOC_003460	0.05	0.1	0.02	0.09	0.07	0	0.09	0.08	0.24	0.2	0.01	0.41	0.41	0.21	0.13	0.41	0.05	0.09	0	0.09	0.06	0	0.36	0.22	0.08	0	0	0.02	0.1	0.03	0	0	0.03	0.11	0.02	0.32	0.33	0.27	0.44	0.45	0.08	0	0.04	0.1	0.1	0.06	0.29	0.14	0.11
XLOC_003461	0	0.04	0.01	0.05	0.06	0.03	0.03	0.03	0.18	0.13	0.19	0.27	0.27	0.32	0.25	0.2	0.08	0.13	0.06	0.17	0.16	0.09	0.17	0.13	0.18	0.12	0.03	0	0.07	0.09	0.04	0.06	0.1	0.08	0.04	0.09	0.04	0.2	0.29	0.12	0.02	0.1	0.01	0.07	0.03	0	0.02	0.03	0.08
XLOC_003467	0	0	0.05	0.05	0.06	0.05	0	0	0.22	0.17	0	0.13	0	0	0.17	0.04	0	0	0.51	0.18	0.11	0.15	0	0	0.39	0.24	0.11	0.13	0	0	0	0.19	0	0.19	0.3	0.93	0.11	0.72	0.15	0.14	0.17	0	0.11	0.32	0.19	0	0.47	0.13	0.21
XLOC_003468	0	0	0	0	0	0	0	0	0	0.19	0	0	0.08	0	0	0	0	0	0	0	0	0	0	0.19	0	0	0	0.42	0	0.13	0	0	0.21	0.11	0	0	0	0	0.09	0	0	0	0	0.15	0	0	0	0.05	0
XLOC_003471	0	0	0	0	0	0	0	0	0	0.04	0	0.07	0	0	0.1	0.11	0.38	0	0	0.44	0	0	0.34	0.07	0	0.21	0.03	0.35	0	0.1	0	0.03	0.12	0.14	0	0.05	0	0.06	0.34	0	0.03	0.07	0.09	0	0	0.02	0	0.22	0
XLOC_003474	0	0.69	0.56	0.99	0	0.27	0.22	0.62	0.64	0.37	0.33	0.75	0.68	0.89	0.52	0.82	1.01	0.61	1.19	0.69	0.78	1.24	0.62	1.07	0.66	0.26	1.06	1.1	0.15	0.19	0.59	0.48	0.57	0.29	0.15	0.46	0.07	0.08	0.09	0.27	1.04	1.5	1.54	0.99	0.98	1.18	0.69	1.22	1.86
XLOC_003476	0	0	0	0.02	0	0	0	0	0.53	0.23	0.97	0.7	1.44	1.02	0.42	1.33	1.06	0.64	0.84	0.49	0.7	0.24	0.23	0.28	0.42	0.66	0.41	0.29	0.47	0.1	0.08	0.29	0.06	0.65	0.08	0.39	0.47	0.18	0.17	0.29	0.34	0.62	0.05	0.06	0.04	0.03	0.01	0.04	0.39
XLOC_003479	0	0	0	0	0	0	0	0	0.09	0.22	0.38	0.03	0.03	0	0.03	0	0	0	0	0	0	0	0	0	0.24	0	0	0	0	0.16	0.09	0	0.19	0	0	0	0	0	0	0	0	0	0.09	0	0	0	0.32	0.07	0
XLOC_003482	0.06	0.29	0.04	0.15	0.18	0	0.11	0.16	0.11	0	0.1	0	0	0	0	0	0.4	0	0	0.12	0.11	0	0.1	0	0	0.31	0	0.03	0	0	0	0	0	0.05	0.12	0.12	0.05	0	0.14	0.14	0	0	0	0.03	0	0	0.08	0.17	0
XLOC_003483	2.23	1.14	1.12	1.67	2.15	2.13	1.84	1.64	0.22	0.45	0.14	0.48	0.84	0.91	0.42	0.57	0.19	0.19	0.17	0.07	0.13	0.05	0.13	0.02	0.32	0.2	0.08	0.14	0.3	0.1	0.02	0.13	0.31	0.34	0.31	0.18	0.67	0.33	0.32	0.17	0.31	0.41	0	0.05	0.2	0.2	0.04	0.18	0.17
XLOC_003487	0.1	0.08	0.07	0	0.4	0.21	0.24	0.17	0.27	0.35	0.19	0.03	0.4	0.37	0.12	0.24	0.29	0.37	0.29	0.26	0.41	0.15	0.04	0.23	0.31	0.37	0.05	0.14	0.57	0.16	0.04	0.32	0.35	0.07	0.13	0.05	0.1	0.15	0	0.03	0.3	0.12	0.21	0.13	0.28	0.14	0.15	0.11	0.32
XLOC_003488	0.16	0.07	0.08	0	0	0	0	0	0.71	0.78	1.68	0.73	0.69	0.45	0.35	0.21	17.77	24.36	17.05	12.02	13.67	7.47	7.54	5.76	19.84	10.18	5.3	5.34	5.92	6.99	6.91	4.81	14.57	10.28	1.98	1.14	0.68	1.1	1.29	1.73	45.82	38.65	17.1	20.72	19.59	18.63	24.76	19.87	31.15
XLOC_003491	0	0.11	0.21	0.6	0.37	0.69	0.66	0.41	0.17	0.11	0.68	0.51	0.86	0.92	0.7	1.31	0.09	0.03	0.21	0.12	0.34	0.66	0.23	0.79	0.02	0.02	0.12	0.09	0.1	1.45	0.29	0.64	0.55	0.59	0.39	1.11	0.97	2.21	1.07	1.99	0.23	0.48	0.82	0.28	0.62	0.78	0.94	0.43	0.24
XLOC_003493	0.13	0.02	0.03	0	0	0.01	0.09	0.01	0.28	0.32	0.57	0.23	0.44	0.34	0.3	0.49	0.05	0.03	0.02	0.06	0.04	0.01	0.06	0.05	0.18	0.09	0.02	0.05	0	0.01	0.08	0.01	0.06	0.01	0.08	0.13	0.2	0.06	0.1	0.08	0	0.01	0.02	0.02	0.01	0.02	0.01	0	0.06
XLOC_003494	0	0	0.01	0	0	0	0	0	0.12	0.01	0.03	0.03	0.13	0.01	0.03	0.05	0.39	0.31	0.27	0.13	0.19	0.28	0.17	0.42	0.31	0.23	0.23	0.22	0.18	0.2	0.07	0.28	0.34	0.32	0.05	0	0	0.02	0	0	0.09	0.15	0.01	0.05	0.12	0.06	0.04	0	0.43
XLOC_003496	0	0	0	0	0	0	0	0	0	0.01	0.04	0.01	0.04	0.03	0	0	0	0.09	0.58	0.07	0.07	0.26	0.04	0	0	0	0.05	0.04	0.03	0.06	0.44	0	0.03	0	0.29	0.02	0	0	0	0.03	0	0	0	0	0.13	0	0.03	0	0.05
XLOC_003498	0	0	0.03	0	0	0	0.09	0	0	0.02	0.09	0.05	0	0	0.05	0.07	0.32	0.11	0.05	0.14	0.09	0.11	0.06	0.08	0.03	0.23	0.26	0.02	0	0.14	0.05	0	0.15	0.16	0	0	0	0.05	0.05	0	0.23	0.17	0.05	0.05	0	0	0.05	0.03	0.08
XLOC_003505	0.18	0.19	0.39	0.12	0.25	0.11	0.4	0.21	0.06	0.04	0.15	0.01	0.06	0.13	0.1	0	0.11	0.14	0.24	0.2	0.21	0.19	0.16	0.18	0.17	0.01	0.01	0.47	0.03	0.19	0	0.16	0.04	0.17	0.22	0.23	0.13	0.05	0.06	0	0.09	0.03	0.14	0.12	0.09	0.37	0.14	0	0.06
XLOC_003511	0	0	0	0	0	0	0	0	0.06	0.08	0.22	0.11	0	0	0.03	0.06	0.15	0.33	0	0.16	0	0	0.09	0	0	0.06	0.06	0.2	0	0	0.14	0.07	0.08	0.04	0.05	0	0	0.06	0.12	0	0	0.06	0	0.05	0	0	0.07	0	0
XLOC_003512	0.13	0.7	0.37	0.63	0.4	1.18	0.94	0.59	0.05	0.02	0.03	0	0.02	0.02	0.04	0	0.29	0.07	0	0.15	0	0	0.03	0.04	0.05	0.05	0	0	0	0	0.16	0	0.02	0.03	0.04	0.04	0	0	0.12	0.14	0.01	0	0.05	0.02	0	0.08	0.12	0.01	0
XLOC_003513	0	0	0.02	0.03	0	0	0.04	0.08	0.05	0.16	0.26	0.14	0.25	0.18	0.2	0.34	0.44	0.42	0.43	0.24	0.42	0.62	0.34	0.61	0.16	0.26	0.2	0.26	0.37	0.41	0.41	0.21	0.12	0.09	0.16	0.13	0.16	0.27	0.25	0.15	0	0.22	0.14	0.1	0.07	0.05	0.15	0.2	0.11
XLOC_003515	0	0.12	0.05	0.17	0.11	0	0	0	0.21	0.15	0.53	0.4	0.2	0.1	0.14	0.06	1.37	0.42	0.99	0.42	0.56	0.18	0.26	0.25	0.31	1.22	0.31	0.21	0.59	0.2	0.2	0.31	0.16	0.51	0.31	0.28	0.03	0.11	0.08	0.16	0.06	0.02	0.12	0.09	0.22	0.18	0	0	0.04
XLOC_003516	0.15	0.32	0.16	0.11	0.54	0.08	0.07	0.11	0.69	2.24	2.51	1.09	1.51	1.35	1.54	1.16	1.05	0.72	1.55	1.18	1.58	0.67	0.63	0.41	0.41	0.51	0.69	0.61	0.75	0.23	0.34	0.16	0.98	1.4	2.74	1.57	3.15	1.63	2.43	2.66	0.46	1.32	1.08	0.41	0.56	0.29	0.4	0.2	0.43
XLOC_003518	0.31	0.17	0.17	0.4	0.39	0.78	0.29	0.48	0.38	0.23	0.54	0.34	0.41	1.11	0.51	0.3	0.18	0.08	0.28	0.16	0.04	0.41	0.42	0.25	0.18	0.1	0.39	0.33	0.04	0.45	0.33	0.18	0.11	0.05	0.67	0.41	0.18	0.26	0.36	0.19	0.29	0.07	0.41	0.34	0.32	0.37	0.47	0.28	0.24
XLOC_003523	0.01	0	0	0.01	0	0.02	0	0	0.01	0	0.07	0.03	0.11	0.09	0.1	0.02	0.14	0.14	0.11	0.16	0.3	0.35	0.31	0.25	0.09	0.08	0.14	0.14	0.19	0.28	0.19	0.08	0.02	0.01	0.02	0.06	0.03	0.14	0.03	0.03	0.15	0.12	0.06	0.11	0.15	0.19	0.22	0.37	0.03
XLOC_003525	0.42	0.66	0.35	0.17	0.34	0.18	0.16	0.81	0.08	0.24	0.07	0.06	0.04	0.18	0.1	0.2	0.1	0.05	0.25	0.17	0.16	0.21	0.11	0.12	0	0.08	0	0	0.11	0.27	0	0	0.18	0.18	0.03	0.27	0.24	0.14	0	0	0.31	0.23	0.12	0.04	0.04	0.13	0.38	0.07	0.08
XLOC_003526	0.44	0.28	0.96	0.43	0.45	0.13	0.31	0.27	0.14	0.15	0.24	0.08	0	0.03	0.04	0.1	0.59	0.12	0.7	0.2	0.16	0.16	0.49	0.42	0.09	0.04	0.36	0.49	0.53	0.25	0.14	0.06	0.19	0.4	0.48	0.15	0.02	0.03	0.12	0	0.33	0.28	0.95	0.36	0.4	0.23	0.91	0.09	0.43
XLOC_003528	0.11	0.04	0.72	0.04	0	0.05	0.56	0.1	0.26	0.17	0.52	0.41	0	0.22	0.31	0.16	0.24	0.21	0.17	0.48	0.35	0.94	0	0.19	0.65	0.18	1.21	0.12	0.35	0.03	0.68	0.41	0.08	0.33	0.31	0.22	0	0.46	0.32	0.12	0.37	0.06	0.19	0.42	0.13	0.4	0.11	0.23	0.5
XLOC_003529	0	0.06	0.3	0.37	0.11	0.07	0.05	0.07	0.02	0.07	0.1	0	0.02	0.05	0.02	0.02	0.08	0.06	0	0.24	0.08	0.03	0.04	0.14	0	0.21	0.13	0.1	0	0.4	0.06	0.03	0	0.25	0.08	0	0.1	0.03	0.13	0.06	0.14	0.06	0.03	0.13	0.07	0.29	0	0.02	0
XLOC_003531	0.04	0.19	0.1	0.14	0	0.15	0.16	0.08	0.04	0.15	0.48	0.06	0.13	0.06	0	0.12	0.28	0.05	0.2	0.09	0.16	0	0.12	0.09	0.01	0.09	0.44	0.16	0.06	0.19	0.26	0.29	0.19	0.18	0.27	0.06	0	0	0.1	0.32	0	0.1	0.2	0.15	0.22	0.09	0.05	0.15	0.07
XLOC_003534	0	0.02	0.07	0.16	0.13	0	0	0	0.26	0.04	0.12	0.23	0.15	0.08	0.13	0.04	0.15	0.24	0.03	0.3	0.31	0.04	0.03	0.03	0.34	0.37	0.04	0.05	0.13	0.1	0.04	0.02	0.07	0.38	0.03	0.2	0	0.04	0	0.08	0.24	0.13	0.25	0.05	0.46	0.41	0.02	0.14	0.04
XLOC_003535	0.08	0.08	0.14	0.24	0.07	0.03	0.1	0.07	0.27	0.06	0.16	0.56	0.04	0.21	0.08	0.02	0.03	0.17	0.19	0.7	0.07	0.27	0	0	0.25	0	0.51	1.02	0.05	0.56	0.65	0	0.33	0	0.35	1.03	0.68	0.58	0.09	0.21	0.02	0	0.3	1.27	1.45	0.3	0.18	0.26	0.13
XLOC_003536	0	0.21	0.15	0.36	0	0.12	0.18	0.17	0.03	0.15	0.1	0.21	0.15	0.14	0.03	0.18	0.03	0.18	0.12	0	0.37	0.29	0.1	0.04	0.05	0	0.11	0.05	0.12	0.24	0.22	0.09	0.16	0.18	0.27	0.14	0.12	0.05	0.17	0.16	0.01	0.05	0.04	0.23	0.16	0.04	0.11	0.1	0.05
XLOC_003537	0.11	0.19	0.14	0.24	0.08	0.05	0.25	0.07	0.05	0.07	0.16	0.04	0.21	0.05	0	0.02	0.06	0.04	0.19	0.03	0.17	0	0	0	0.06	0.11	0.15	0.04	0.02	0	0	0.05	0.14	0.14	0.03	0	0	0.06	0.06	0	0.29	0.09	0.08	0.06	0.11	0.05	0.04	0.04	0.22
XLOC_003539	0	0	0.28	0.19	0	0	0.04	0	0	0	0	0	0	0.08	0	0	0	0	0	0	0	0	0	0	0	0.21	0	0	0	0	0	0	0	0	0	0	0	0	0	0	0.11	0	0	0	0	0	0	0	0
XLOC_003540	0.48	0.22	0.42	0.14	0.5	0.22	0.1	0.1	0.06	0	0.19	0.19	0.18	0	0.14	0.08	0.08	0.11	0.04	0.04	0.23	0	0	0.03	0.21	0.08	0.06	0.1	0.09	0.18	0.04	0.07	0.42	0.62	0.03	0	0	0	0.09	0	0.06	0.12	0.18	0.19	0.02	0.09	0.15	0.02	0.21
XLOC_003541	0.66	1.06	0.84	0.55	0.87	1.09	0.92	0.97	0	0	0	0.01	0.01	0.02	0	0	0	0	0	0	0.03	0.01	0.01	0.01	0	0	0.01	0	0	0.03	0	0	0	0	0.02	0	0	0	0	0	0.05	0	0	0.01	0	0	0.03	0.01	0
XLOC_003545	0.35	0.29	0.09	0.03	0.21	0.94	0.4	1.66	0.33	0.59	0.54	0.51	0.24	0.34	0.58	1.03	0.75	0.77	0.31	0.51	0.24	0.58	0.59	2.05	0.71	0.64	0.17	0.5	0.43	0.21	1.05	1.36	0.35	0.48	0.53	0.64	0.45	0.72	0.76	1.47	1.01	0.95	0.51	1.16	0.05	0.55	2.36	1.86	0.44
XLOC_003546	0	0	0	0.03	0	0.1	0.07	0	0.04	0.02	0.22	0	0.17	0.04	0.25	0.2	0.05	0	0	0	0	0	0.33	0.03	0	0.02	0.04	0.02	0	0	0.12	0	0	0.06	0.18	0.07	0.03	0.04	0.09	0.04	0	0	0.02	0.08	0	0.05	0	0	0.09
XLOC_003551	0.14	0.2	0.14	0.47	0.44	0.12	0.18	0.11	0.21	0.18	0.21	0.04	0.08	0.07	0.04	0.16	0.61	0.79	0.55	0.4	0.39	0.66	0.24	0.26	0.7	0.28	0.07	0.07	0.27	0.27	0.26	0.54	0.46	0.54	0.52	0.26	0.21	0.31	0.41	0.5	0.42	0.39	0.45	0.37	0.2	0.52	0.05	0.66	0.25
XLOC_003557	1.47	2.14	1.35	2.26	2.25	3.83	3.7	5.12	0.71	1.38	0.61	0.76	0.18	0.42	0.5	0.44	0.19	0.32	0.3	0.22	0.27	0.27	0.54	0.8	0.51	0.64	0.19	0.51	0.28	0.56	0.12	0.62	0.24	0.25	0.74	0.66	0.13	1.05	0.65	0.98	0.08	0.37	0.19	0.44	0.07	0	0.79	0.31	0.34
XLOC_003558	0.96	1.13	1.76	0.78	0.7	0.98	0.66	0.77	0.51	0.27	0.64	0.35	0.21	0.51	0.51	0.38	0.38	0.16	0.18	0.2	0.08	0.18	0.33	0.23	0.27	0.21	0.47	0.16	0	0.29	0.21	0.35	0.45	0.69	1.15	0.18	0.1	0.31	0.31	0.54	0.77	0.38	0.67	0.23	0.04	0.32	0.26	0.24	0.07
XLOC_003562	0.07	0.08	0.11	0.1	0.17	0.39	0.41	0.11	0.04	0.1	0.05	0.13	0.12	0.24	0.21	0.1	0.05	0	0.05	0.15	0	0.06	0.1	0.11	0.14	0.14	0.2	0.09	0	0.27	0.19	0.08	0.02	0.11	0.09	0.1	0.06	0.21	0.12	0	0.23	0.35	0.28	0.04	0.01	0.3	0.03	0.08	0.08
XLOC_003563	0	0	0	0	0	0	0.06	0.12	0	0	0	0	0	0.04	0	0.04	0	0	0	0	0	0	0	0	0	0	0	0	0	0.5	0	0.04	0	0	0	0	0	0	0	0	0	0	0.04	0	0	0	0	0.09	0
XLOC_003564	0	0.04	0	0.1	0.06	0.29	0.24	0.12	0	0	0.24	0	0.07	0.15	0.48	0	0.47	0.36	0.4	0.26	0.18	0.08	0.84	0.34	0.26	0.54	0.11	0	0	0.32	0.53	0	0.1	0.29	0.12	0	0.28	0.62	0.23	0	0.44	0.11	0	0	0.59	0.16	0.13	0	0.22
XLOC_003567	0.11	0	0.05	0.06	0.15	0.16	0	0	0	0.02	0.04	0.16	0.22	0.11	0.04	0.09	0.13	0	0.08	0	0	0	0.09	0	0.04	0	0.1	0	0.02	0.13	0	0	0	0.19	0.07	0.07	0.06	0.42	0.26	0.08	0	0	0	0.02	0	0	0.05	0	0.04
XLOC_003568	0	0.13	0.03	0	0	0.2	0	0	0.02	0	0.04	0	0	0.11	0.04	0	0	0	0	0.08	0	0.09	0	0	0.04	0	0	0	0	0.16	0	0	0	0	0	0.08	0	0	0	0	0.09	0	0	0	0	0	0	0	0
XLOC_003571	0.2	0.1	0.29	0.43	0.2	0.17	0	0.18	0.03	0.18	0.1	0.18	0.05	0.14	0.17	0.23	0.07	0.04	0.3	0.19	0.63	0.06	0.28	0.26	0.33	0.46	0.03	0.1	0.06	0	0.53	0.37	0	0.04	0.05	0	0.13	0.26	0.17	0.17	0.16	0.33	0.89	0.18	0.06	0	0.03	0.07	0.34
XLOC_003574	0.17	0.04	0.03	0.05	0.25	0.35	0.02	0.11	2.34	2.07	2.7	1.92	2.58	1.86	2.14	2.42	2.45	2.54	1.63	1.45	1.98	1.94	1.76	1.96	2.83	1.53	1.92	1.92	2.06	1.38	1.31	1.38	3.16	2.78	1.81	1.58	1.39	1.69	1.65	1.65	2.75	2.56	2.22	2.12	2.18	2.82	1.79	1.88	2.75
XLOC_003576	0.06	0.08	0	0.07	0	0.05	0.11	0	0.02	0.19	0.08	0.13	0.2	0.28	0.07	0.09	0.26	0.09	0.22	0.15	0.14	0.22	0.12	0.21	0.15	0.03	0.28	0	0.04	0.16	0	0.06	0.27	0.45	0.06	0.03	0.11	0.22	0.35	0.03	0.17	0.1	0.31	0.17	0.04	0.18	0.04	0.06	0.24
XLOC_003577	0	0	0	0	0	0.05	0	0.05	0	0	0	0	0.06	0	0	0	0.04	0.13	0	0.29	0.3	0.17	0.06	0.07	0	0	0.03	0.28	0.03	0.03	0.1	0.22	0.02	0.04	0	0	0	0	0	0	0.56	0.12	0.02	0.23	0.21	0	0.22	0.07	0
XLOC_003584	0.57	0.84	0.95	0.57	0.56	1.07	0.9	0.75	0.11	0.14	0.19	0.3	0.65	0.79	0.61	0.36	0.75	0.38	0.16	0.33	0.19	0.19	0.37	0.35	0.22	0.2	0.26	0.25	0.32	0.23	0.17	0.19	0.24	0.4	0.63	0.18	0.27	0.59	0.72	0	0.33	0.69	0.29	0.42	0.23	0.43	0.04	0.09	0.03
XLOC_003590	0.03	0.17	0.04	0.07	0.09	0.29	0.48	0.11	0	0	0.11	0	0.12	0.09	0.03	0.12	0.13	0	0	0	0.11	0	0	0	0	0.07	0	0	0	0	0	0	0	0	0	0	0	0.06	0.28	0	0.07	0	0	0	0	0	0	0	0
XLOC_003591	0.43	0.41	0.12	0.55	0.34	0.34	0.4	0.38	3.18	4.74	2.05	5.62	5.28	5.32	4.32	5.12	0.22	0.03	0.7	0.51	0.51	0.74	0.48	1.23	0.05	0.21	0.34	0.27	0.19	0.52	0.3	0.19	0.22	0.77	1.06	3.14	2.13	1.8	1.71	2.01	0.05	0.29	0.1	0.18	0.33	0.08	0	0.09	0
XLOC_003605	1.05	1.43	0.77	1.29	1.28	1.25	1.79	1.16	0.02	0.06	0.1	0.17	0.03	0.07	0.06	0	0.11	0.05	0.08	0.08	0.18	0.05	0.05	0	0.1	0.1	0	0.02	0.26	0.18	0	0.1	0.09	0.09	0.15	0.18	0.21	0.04	0.21	0	0.1	0.11	0.03	0.08	0.05	0.02	0.11	0.01	0.05
XLOC_003606	0	0	0.02	0.01	0.06	0.01	0.03	0.04	0.05	0.04	0.07	0	0.1	0.06	0.13	0.32	0.02	0.02	0.06	0.01	0.01	0.04	0.02	0.1	0.1	0.03	0.05	0	0.09	0	0.02	0.09	0.03	0.07	0.12	0.01	0.3	0.07	0.16	0.44	0.01	0	0	0.01	0.1	0	0.05	0.17	0
XLOC_003614	0.81	1.14	0.68	1.23	0.67	1.29	0.6	0.83	0.44	0.31	0.2	0.31	0.23	0.29	0.18	0.4	0.56	0.45	0.56	0.25	0.21	0.28	0.16	0.33	0.87	0.61	0.46	1.03	0.55	0.33	0.52	0.42	0.92	1.01	0.27	0.22	0.17	0.47	0.11	0.04	0.72	0.77	0.69	0.67	0.31	0.74	0.18	0.29	0.37
XLOC_003615	1.03	1.1	1.31	0.72	0.6	0.6	0.93	0.97	0.42	0.46	0.5	0.44	0.64	0.35	0.27	0.49	0.5	0.49	0.64	0.39	0.49	0.43	0.57	0.7	0.83	0.72	0.7	0.31	0.38	0.53	0.39	0.44	1.81	1.5	0.26	1.38	0.24	0.86	0.21	0.29	0.67	0.76	0.69	0.71	0.85	0.84	0.86	0.83	0.72
XLOC_003618	0.02	0.11	0	0	0.24	0.39	0.04	0.11	0.38	0.59	0.37	0.18	0.22	0.91	0.12	0.29	0.65	1	0.58	0.02	0.26	1.28	0.38	0.6	1.45	0.78	0.07	0.01	0.51	1.07	0.3	0.71	0.4	0.3	0.22	0.02	0.19	0.57	0.14	0.22	1.01	1.21	0.19	0.02	0.37	1.11	0.41	0.46	0.57
XLOC_003622	0.03	0.24	0.16	0.06	0.32	0.09	0.27	0.1	0.05	0.43	0.2	0.19	0.15	0.46	0.31	0.38	0.23	0.25	0.11	0.16	0.32	0.2	0.11	0.32	0.02	0.31	0.06	0.08	0.02	0.16	0.04	0.2	0.1	0.08	0.03	0.08	0.09	0.17	0.13	0.4	0.22	0.03	0.08	0	0.1	0	0.09	0.11	0.15
XLOC_003624	0	0	0	0	0	0	0	0	0.02	0	0	0	0.02	0.13	0	0.3	0	0.11	0	0	0.1	0	0.15	0.09	0	0.2	0	0.04	0.12	0.04	0	0.05	0.05	0	0	0	0.32	0	0	0.21	0	0.06	0	0	0	0	0	0	0
XLOC_003627	0.36	0.97	0.8	0.96	0.63	1.27	0.76	0.92	0.42	0.13	0.15	0.3	0.46	0.16	0.1	0.31	0.49	0.58	0.07	0.52	0.45	0.44	0.46	0.61	0.36	0.24	0.04	0.3	0.29	0.3	0.77	0.35	0.75	0.77	0.74	0.46	0.31	0.04	0.17	0.4	0.95	1.3	0.48	1.03	1	1.77	0.97	0.85	0.45
XLOC_003629	0	0	0.02	0.03	0.03	0	0.1	0.02	0.08	0.15	0.62	0.1	0.05	0.03	0.02	0.05	0.9	0.78	0.79	1.37	0.72	1.24	0.87	0.95	0.4	0.37	0.26	0.85	0.33	1.14	0.75	0.5	0.68	0.62	0.74	0.48	0.57	0.61	0.44	0.4	0.63	1.05	0.62	2.12	0.7	1.17	0.97	0.89	0.88
XLOC_003636	0	0	0	0.07	0.02	0	0	0.06	0.04	0	0.08	0.01	0.01	0	0.04	0.09	0.03	0.07	0	0.02	0.04	0.03	0.04	0.02	0.01	0.01	0	0	0.07	0.14	0.01	0.04	0	0	0.15	0.25	0.3	0.12	0.3	0.03	0	0.05	0	0.07	0.03	0	0.06	0.3	0.13
XLOC_003638	0	0.11	0.15	0.41	0.05	0.05	0.05	0.37	0	0.05	0.27	0.03	0.11	0.35	0.06	0.06	0	0.08	0	0.1	0	0.06	0.08	0.18	0	0	0	0.14	0	0.03	0	0	0.11	0.08	0	0	0	0	0.06	0.12	0	0.2	0	0	0.19	0.13	0.32	0.32	0
XLOC_003639	0.37	0.33	1.2	0.1	0.06	0	0.06	0	0.47	0.19	0.8	0.1	0.17	0	0.1	0.11	1.06	0.24	0.44	0.12	0.17	0.15	0.64	0.42	0.03	0.31	1.18	0	0.08	0.18	0	0.27	0.22	0.78	0.58	0.24	0	0	0.14	0.14	0.61	0.27	1.97	0.25	0.33	0.15	0.08	1.17	0.21
XLOC_003641	0	0	0	0	0	0	0	0	0	0	0	0	0	0	0	0	0.29	0.6	0.15	0.06	0.08	0.07	0.05	0	0.06	0.06	0	0	0	0	0	0	0.21	0.09	0.05	0	0.02	0	0.07	0.06	0.1	0.22	0.02	0	0	0	0	0	0.16
XLOC_003650	0.09	0.02	0	0	0	0.04	0	0.08	0.03	0.09	0.11	0.02	0.01	0.01	0.05	0.11	0.07	0.04	0	0	0.08	0	0.09	0.1	0.21	0.26	0.04	0.05	0	0.17	0.03	0.03	0.12	0.02	0.09	0.02	0.12	0	0.03	0.26	0.04	0	0.01	0.04	0	0	0	0.03	0.03
XLOC_003651	0.1	0.06	0	0.23	0.18	0.23	0.11	0.13	0.07	0.06	0.1	0.07	0.06	0.05	0.18	0.05	0.04	0.14	0.08	0.12	0.09	0.13	0.25	0.11	0.17	0.19	0.02	0.02	0.05	0	0.09	0.18	0.12	0	0.04	0.16	0	0	0.07	0	0.01	0.16	0	0.23	0.01	0.07	0.24	0.17	0.09
XLOC_003656	0.56	0.8	0.85	1.13	0.43	0.11	0.4	0.55	0.11	0	0.06	0	0.2	0.11	0.07	0.07	0	0.1	0.25	0	0.17	0	0	0	0	0	0.1	0	0.23	0	0.7	0	0.27	0.23	0	0.06	0.11	0	0	0	0.31	0.14	0.21	0	0	0	0	0.08	0.14
XLOC_003664	0.04	0.03	0.03	0	0	0	0	0	1.04	1.19	0.24	0.52	0.42	0.21	0.62	0.53	0.03	0.1	0.08	0.16	0	0	0.1	0	0.05	0.27	0.19	0.11	0	0	0	0	0.15	0.18	0.19	0.65	0.46	0.34	0.57	0.61	0.14	0.23	0	0.15	0.02	0.2	0	0.11	0.05
XLOC_003665	0	0.08	0	0.02	0	0	0	0	3.52	3.36	2.14	3.05	2.09	3.14	2.34	3.4	0.3	0.62	0.27	0.12	0.22	0.22	0.21	0.36	0.98	1.23	0.89	0.64	0.02	0.2	0	0.04	0.98	0.6	0.53	2.41	2.48	2.58	0.66	2.67	0.51	0.48	0.17	0.12	0.21	0.45	0.06	0.16	1.02
XLOC_003666	0	0	0	0	0	0	0	0	1.22	0.97	0.07	1.32	0.6	0.68	0.66	0.88	0.06	0.15	0.03	0.06	0.01	0	0	0	0.26	0.28	0.1	0.14	0	0	0	0.08	0.27	0.24	0.11	0.86	0.25	0.5	0.37	0.53	0.05	0.04	0.19	0.12	0.02	0.07	0	0.02	0.13
XLOC_003667	0	0	0	0	0	0	0	0	0.56	0.54	0.06	1.03	0.35	0.73	0.87	0.65	0.03	0.15	0.02	0.17	0	0.14	0.05	0.12	0.13	0	0.01	0.29	0	0	0.02	0	0.16	0.04	0.04	0.69	0.18	0.22	0.2	0.04	0.06	0.13	0	0.15	0.01	0.05	0.01	0.03	0.07
XLOC_003671	0.05	0.03	0	0	0	0	0	0	0.03	0	0	0	0	0	0	0	0	0	0	0.09	0	0.06	0	0	0	0.05	0	0	0.53	0	0	0	0	0	0	0	0	0	0	0	0	0	0	0	0	0	0	0	0
XLOC_003680	0.31	0.19	0.22	0.63	0.1	0.16	0.24	0.5	0.2	0.31	0.44	0.69	0.21	0.09	0.13	0.48	0.26	0.14	0.44	0.58	0.12	0.13	0.16	0.31	0.14	0.3	0.13	0.44	0.11	0.06	0.08	0.16	0.11	0.23	0.29	0.5	0.16	0.13	0.06	0.26	0.1	0.34	0.19	0.42	0.12	0.06	0.45	0.31	0.29
XLOC_003686	0.03	0.01	0.02	0.1	0.03	0.05	0.01	0.04	0.28	0.43	0.93	0.47	0.59	0.72	0.52	0.35	0.53	0.41	0.62	0.68	0.6	0.81	0.82	0.41	0.38	0.33	0.92	0.9	0.47	0.64	0.6	0.53	0.39	0.61	0.59	0.66	0.58	0.32	0.55	0.11	0.39	0.42	0.72	1.27	0.74	0.5	0.9	0.49	0.56
XLOC_003688	0	0	0	0	0	0	0	0	0	0.03	0.1	0	0.02	0.02	0.01	0.07	0.18	0.05	0.17	0	0.03	0.16	0.07	0.04	0.11	0.16	0.13	0.13	0.15	0.13	0.33	0.28	0.04	0.06	0.2	0.02	0.14	0.29	0.06	0.17	0.17	0.1	0.08	0.02	0.23	0.06	0.06	0.06	0.11
XLOC_003693	0.07	0.04	0.08	0.07	0.2	0.02	0.09	0.07	0	0	0	0	0	0	0.08	0.04	0.01	0.17	0.24	0.16	0.34	0.16	0.09	0.25	0.14	0.06	0.04	0.08	0.05	0	0	0.01	0	0	0	0.04	0.1	0	0.04	0.17	0.01	0	0	0	0.17	0	0.11	0.09	0.04
XLOC_003694	0	0.06	0	0.07	0.09	0	0	0	0.08	0	0	0	0	0.1	0	0.05	0	0	0.05	0	0	0	0.07	0	0	0	0	0.07	0	0	0.02	0.06	0	0	0	0	0	0	0	0.15	0	0	0	0	0	0.08	0.12	0.59	0
XLOC_003695	0	0	0	0	0	0	0	0.07	0.05	0	0	0.12	0	0.04	0.13	0.04	0.33	0.12	0	0	0	0	0	0	0	0	0	0	0	0	0	0	0	0	0	0	0.2	0	0	0	0.09	0	0	0	0	0	0	0	0.09
XLOC_003698	0.1	0.39	0.3	0.17	0.36	0.09	0.1	0.51	0.37	0.41	0.85	0.31	0.26	0.12	0.38	0.21	0.22	0.36	0.27	0.15	0.29	0.51	0.33	0.4	0.62	0.03	0.59	0.98	0.52	0.28	0	0.06	0.34	0.51	0.54	0.67	0.27	0.38	0.3	0.59	0.58	0.34	0.29	0.26	0.34	0.22	0.39	0.07	0.36
XLOC_003699	0.38	0.19	0.23	0.19	0.23	0.14	0.15	0.16	0.1	0.1	0.15	0.08	0.07	0.03	0.02	0.04	1.15	0.96	0.81	0.51	0.23	0.29	0.41	0.16	0.74	0.45	0.38	0.52	0.37	0.32	0.36	0.16	0.39	0.38	0.05	0	0.04	0.11	0.06	0.11	0.28	0.37	0.03	0.11	0.11	0.05	0.22	0.17	0.82
XLOC_003700	0.19	0.06	0.2	0.08	0.16	0.07	0.01	0.14	0.16	0.05	0.13	0.16	0.22	0.14	0.3	0.15	0.2	0.24	0.04	0.23	0.28	0.18	0.14	0.26	0.19	0.16	0.19	0.12	0.18	0.21	0.01	0.3	0.24	0.09	0.1	0.18	0.17	0.03	0.17	0.17	0.16	0.09	0.1	0.07	0.28	0.14	0.24	0.47	0.08
XLOC_003701	0.04	0	0.06	0.24	0	0	0	0.07	0.04	0.08	0.04	0.04	0.17	0	0	0	0	0.03	0.04	0	0.24	0.05	0	0.03	0.13	0	0.06	0.42	0.29	0.14	0	0	0.06	0.06	0.14	0.22	0	0	0.04	0	0	0	0	0	0.05	0	0	0	0.09
XLOC_003702	0	0	0	0	0	0	0	0.07	0	0	0.12	0	0	0.05	0	0	0.51	0.62	0	0.04	0.11	0	0.19	0.07	0.11	0.44	0.09	0	0.12	0.12	0	0.17	0.2	0	0	0	0.1	0	0	0	0	0.15	0	0	0	0	0	0	0.36
XLOC_003704	0	0	0	0	0	0	0	0	0	0	0.06	0	0	0	0	0	0	0.04	0	0	0	0	0	0	0.03	0	0	0	0	0	0	0	0	0	0.58	0	0	0	0	0	0	0.03	0.03	0	0	0	0	0	0.06
XLOC_003710	0.32	0.09	0	0.13	0.44	0.11	0.09	0.03	0.21	0.42	0.22	0.37	0.33	0.34	0.64	0.46	0.21	0.05	0.42	0.38	0.26	0.16	0.31	0.44	0.05	0.25	0.14	0.1	0.36	0.17	0.72	1.01	0.81	0.5	0.81	0.47	0.19	1.69	1.3	1.2	0.11	0.14	0.29	0.45	0.11	0.44	0.13	0.35	0.04
XLOC_003713	0	0.01	0.03	0.02	0.02	0.03	0.02	0.01	0.19	0.25	0.28	0.26	0.27	0.29	0.45	0.41	0.27	0.33	0.25	0.29	0.41	0.26	0.62	0.44	0.3	0.24	0.23	0.26	0.28	0.28	0.28	0.27	0.3	0.27	0.2	0.31	0.35	0.39	0.65	0.51	0.15	0.13	0.11	0.16	0.1	0.13	0.23	0.17	0.27
XLOC_003714	0	0.28	0.3	0.33	0	0.24	0.06	0.24	0.2	0.04	0.07	0.04	0.11	0.16	0.11	0	0	0.05	0.07	0	0.06	0.08	0	0	0	0	0.04	0.07	0	0.08	0.07	0.08	0	0.1	0.26	0.88	0.06	0	0	0.08	0.3	0.04	0.08	0	0.25	0.12	0.05	0	0.16
XLOC_003716	0	0	0	0	0	0	0.04	0	0	0	0	0.05	0.03	0.03	0.18	0	0.03	0.04	0	0	0	0	0	0.16	0	0	0	0	0	0.17	0	0.14	0	0.03	0	0.41	0.04	0.24	0.05	0	0.03	0.05	0	0.02	0	0.03	0	0.45	0.05
XLOC_003719	0	0	0.04	0	0	0	0.11	0.11	0.04	0	0.06	0	0	0.03	0.07	0	0	0	0.37	0	0.06	0.15	0.1	0.11	0	0.4	0.07	0.03	0	0	0.2	0	0	0.09	0.11	0.06	0	0	0.07	0.07	0.07	0.1	0.31	0.22	0.15	0.33	0.04	0.08	0
XLOC_003720	0	0.2	0.14	0.2	0.1	0.43	0.18	0.4	0.09	0.05	0.21	0.21	0.08	0.06	0.03	0.06	0.04	0.19	0.1	0.19	0.05	0.55	0.08	0.13	0.2	0.11	0.76	0.1	0.06	0.69	0.51	0.31	0.22	0.11	0.05	0.49	0.04	0.67	0.35	0.11	0.39	0.25	0.34	0.4	0.12	0.24	0.44	0.54	0.06
XLOC_003722	0.22	0.15	0.27	0	0.31	0.46	0.4	0.25	0.26	0.07	0.05	0.07	0.1	0.05	0	0	0	0	0	0	0	0.15	0	0	0	0	0	0	0	0	0	0.04	0.05	0	0	0	0.22	0	0.04	0	0	0.02	0	0	0	0	0.15	0	0
XLOC_003728	0	0	0	0	0	0	0	0	0.06	0.2	0.04	0.01	0	0	0.03	0.03	0.11	0.27	0.05	0	0.05	0.23	0	0.05	0.39	0.19	0.02	0.03	0	0.1	0	0	0.06	0.2	0	0.05	0	0.11	0.09	0.06	0.03	0.01	0	0	0	0	0	0	0.06
XLOC_003731	0.23	0.32	0.14	0.03	0.12	0	0.07	0.03	0.53	0.35	0.3	0.27	0.19	0.13	0.39	0.54	0.08	0.3	0	0.19	0.11	0.33	0.19	0.47	0.46	0.54	0	0.18	0.29	0.21	0.15	0.57	0.23	0.67	0.51	0.61	0.17	0.16	0.27	1.37	0.28	0.21	0.07	0.12	0.02	0.07	0.45	0.24	0.26
XLOC_003733	0	0.05	0.1	0	0.07	0	0.07	0.06	0.29	0.11	0.07	0.19	0.12	0.08	0.39	0.21	0.31	0.22	0	0	0.19	0.09	0.11	0.12	0.08	0.27	0.08	0.07	0.04	0	0	0	0	0.26	0.27	0	0.12	0.07	0.08	0	0.39	0.23	0.32	0.04	0.25	0.43	0.53	0.39	0.16
XLOC_003734	0.69	0.36	1.84	0.34	0.31	0.09	1.62	0.71	0	0	0.03	0	0	0	0	0	0.04	0	0	0	0	0	0	0	0	0	0	0	0	0	0	0	0	0	0	0	0	0	0	0	0	0	0	0	0	0	0	0	0
XLOC_003735	0.48	0.41	0.67	0.1	0.04	0.05	0.84	0.5	0	0	0	0	0	0	0	0	0	0	0	0	0	0	0	0	0	0	0	0	0	0	0	0	0	0	0	0	0	0	0	0	0	0	0	0	0	0	0	0	0
XLOC_003737	0.38	0	0	0	0	0	0	0.1	0.1	0.23	0	0	0.03	0	0	0	0.16	0.5	0	0.11	0.05	0	0	0.19	0.27	0.18	0.21	0.54	0.14	0.23	0	0.13	0	0	0	0.37	0	0	0.13	0	0.33	0.06	0	0	0	0	0	0	0.31
XLOC_003740	0.02	0.04	0.05	0.04	0	0.06	0	0.11	0.06	0.03	0.09	0.11	0.1	0.19	0.15	0.38	0.02	0.05	0.11	0.06	0.07	0.07	0.21	0.28	0.07	0	0.1	0.02	0.11	0.35	0.08	0.21	0.07	0.06	0.1	0.08	0.2	0.62	0.29	0.27	0.08	0.13	0.01	0.18	0.17	0.09	0.15	0.08	0.1
XLOC_003741	1.42	0.04	0.41	0.07	1.12	0.82	0.02	0.07	1.49	0.19	0.64	0.29	2.39	2.45	0.4	0.46	0.3	1.07	0.33	0.16	0.79	0.73	0.06	0.16	1.41	0.19	0.63	0.1	0.92	0.54	0.1	0.24	1.23	0.21	0.44	0.23	0.56	0.97	0.24	0.2	1.2	0.16	0.34	0.14	1.14	0.77	0.17	0.19	1.19
XLOC_003743	0.4	0.1	0.06	0.1	0.08	0.23	0.04	0.06	0.28	0.03	0.18	0.09	0.5	0.4	0.29	0.22	0.03	0.34	0	0	0.11	0.05	0.15	0.14	0.3	0.03	0.11	0.05	0.17	0.24	0.15	0.05	0.33	0	0.25	0.04	0.05	0.19	0.1	0.05	0.07	0.05	0.21	0.05	0.32	0.14	0.13	0.09	0.28
XLOC_003754	0	0	0	0	0	0	0	0	0	0	0.03	0	0	0	0.02	0	0.55	0	0.48	1.18	0.03	0	0	0	0.08	0.63	0.04	0.3	0	0	0	0	0	0.25	0	0.07	0	0	0	0.3	0	0.06	0	0	0.04	0	0	0	0.15
XLOC_003755	0	0	0	0	0	0	0	0	0	0	0.07	0	0	0	0	0	1.02	1.3	0.23	0.21	0.06	0.39	0.25	0.4	0.68	0.56	0.19	0.06	0.07	0.24	0.02	0.1	0.48	0.45	0.09	0	0	0	0	0	1.7	1.67	0.23	0.12	0.02	0.23	0.29	0.34	1.12
XLOC_003758	0.78	0.51	1.12	0.71	0.88	1.53	1.01	1.2	1	1.29	6.55	0.66	0.68	1.26	2.54	1.86	0.15	0.34	1.09	0.49	0.98	2.09	0.89	0.65	0.89	0.86	3.85	0.95	1.35	2.95	2.28	2.31	3.02	2.99	17.41	3.82	3.55	7.22	3.7	7.77	0.4	0.59	2.32	1.76	1.17	1.88	1.26	1.39	0.49
XLOC_003759	0.04	0.01	0.06	0.09	0.05	0.04	0.01	0.07	0.03	0.05	0.29	0	0	0	0	0	0.52	0.45	0.28	0.3	0.18	0.25	0.22	0.29	0.64	0.35	0.15	0.23	0.22	0.11	0.46	0.4	1.02	0.91	0.27	0.25	0.04	0.04	0.1	0.09	2.45	3.41	3.12	3.15	1.35	3.07	1.89	4.18	0.71
XLOC_003760	0.13	0.06	0.08	0	0.04	0	0.08	0.06	1.04	0.92	1.18	1.21	1.16	1.3	0.58	1.04	1.03	0.65	1.76	0.54	0.29	0.42	0.2	0.31	1.39	2.28	0.89	1.04	0.07	0.54	0.46	0.43	5.34	2.99	0.52	3.08	1.42	2.02	1.37	1.89	1.11	0.9	0.35	0.38	0.14	0.19	0.23	0.31	0.8
XLOC_003761	0	0.57	0.77	0	0	0.08	0.24	0.43	0.26	6.34	4.33	0.46	0.3	2.5	1.36	0.52	8.33	0.25	6.36	0.03	0.12	1.02	0.59	0.61	0.4	14.57	7.52	0.2	0.12	2.52	0.97	0.87	1.7	24.24	2.29	3.06	0.44	2.84	1.91	1.86	0.3	6.87	3.25	0.5	0.17	1.5	1.51	0.9	0.36
XLOC_003762	0.04	0.05	0	0	0	0	0.21	0.03	0.04	0	0.08	0.04	0.02	0.02	0.04	0.04	0	0.09	0.08	0	0.14	0.32	0	0.06	0	0.14	0.06	0	0	0.29	0	0	0.08	0.11	0.11	0.07	0.03	0.31	0	0.08	0.12	0	0.06	0.02	0	0.02	0.2	0	0
XLOC_003767	0.08	0.07	0	0.09	0.02	0.05	0.04	0.03	0.61	0.53	0.27	0.68	0.23	1.01	0.16	0.28	1.01	1.39	0.33	0.81	0.45	0.67	0.43	0.4	1.9	1.12	0.28	0.72	0.69	0.56	0.37	0.91	0.71	0.73	0.3	0.36	0.08	0.54	0.2	0.21	1.83	1.76	0.65	0.84	0.63	1.24	0.76	0.91	1.48
XLOC_003769	0	0	0	0	0	0	0	0	0.03	0.04	0.3	0.24	0.03	0	0.01	0.06	0.76	0.3	0.17	0.27	0.05	0.04	0.29	0.18	0.18	0.37	0.05	0.17	0.01	0.04	0	0	0.16	0.11	0.24	0.18	0.01	0.11	0.02	0.23	0	0.07	0.04	0	0	0	0	0.03	0.21
XLOC_003771	0	0.14	0.02	0.21	0	0.09	0.05	0.14	0.06	0.06	0.51	0.1	0	0.1	0	0.09	0.4	0.45	0.13	0.05	0.05	0.1	0.21	0.07	0.21	0.12	0.15	0.19	0.38	0.09	0.47	0.19	0.06	0.08	0.12	0.13	0.07	0	0.06	0.06	0.22	0.09	0.03	0.07	0.02	0.22	0	0	0.12
XLOC_003772	2.25	2.61	3.01	3	1.33	5.22	3.48	3.52	0	0.2	0.07	0.07	0.03	0.15	0.14	0.07	0.23	0.05	0.2	0	0	0.39	0.26	0.11	0.07	0.39	0.11	0.17	0.08	0	0.24	0.2	0.14	0.05	0	0.19	0.06	0.07	0.37	0	0.18	0.14	0.11	0.16	0.53	0.23	0	0.09	0.07
XLOC_003775	0.06	0.17	0.04	0.2	0	0.11	0.17	0	0	0	0	0.03	0	0.14	0.17	0.25	0.13	0.14	0.19	0.06	0.39	0.23	0.1	0.21	0.24	0.03	0	0.06	0.04	0.74	0.4	0.15	0.22	0.14	0.06	0.24	0.43	0.26	0.14	0.42	0.07	0	0.24	0.44	0.15	0.48	0.76	0.08	0.21
XLOC_003776	0	0.05	0.06	0	0	0.07	0	0	0	0	0	0	0	0	0.13	0.09	0	0	0	0	0.21	0.19	0.06	0.07	0	0	0	0	0	0.05	0.17	0.05	0	0	0	0.08	0.13	0	0	0	0	0	0.57	0	0.09	0.33	0.37	0.53	0
XLOC_003780	0.07	0.11	0.05	0.03	0.03	0.44	0.09	0.12	0	0.02	0	0	0	0	0	0	0	0	0.03	0.03	0.06	0.04	0.03	0	0.02	0	0	0	0.04	0.02	0.15	0.06	0	0.05	0.06	0	0	0	0	0	0.15	0.09	0.02	0	0.08	0.04	0.02	0	0
XLOC_003781	0.09	0.08	0.39	0.69	0.39	0.5	0.5	0.4	0.25	0.03	0.06	0.05	0.03	0.09	0.25	0.07	0.09	0.05	0.12	0.06	0.16	0.04	0.17	0.13	0.15	0.03	0.07	0.14	0.19	0.04	0.11	0	0.13	0.18	0.08	0	0.03	0	0.11	0	0.17	0.15	0	0.09	0	0.09	0.21	0.06	0
XLOC_003784	0	0	0	0	0	0	0	0	0	0	0.34	0	0	0	0	0	0.54	0	0.49	0.79	0.25	0.73	0.65	0.7	0.49	0.21	0	0	0.07	0.1	0.47	0.53	0.39	0.64	0.1	0	0	0.5	0	0	0.81	0.53	1.03	0.52	0.26	0.95	1.88	1.18	0.37
XLOC_003787	0.32	0.85	0.28	0.23	0.32	0.19	0.16	0.44	0.13	0.26	0	0	0.29	0.12	0.18	0.02	0.05	0.17	0.11	0	0.19	0	0.37	0	0.3	0.1	0.04	0	0.09	0.19	0	0.04	0.18	0.16	0.33	0.07	0.06	0	0.29	0	0.18	0.43	0.34	0	0.04	0.19	0.15	0	0.12
XLOC_003789	0	0	0	0	0	0	0	0	0.02	0.03	0.12	0.13	0.04	0.01	0.02	0.05	0.49	0.93	0.4	0.76	0.31	0.34	0.29	0.62	0.27	0.43	0.13	0.38	0.06	0.07	0.14	0.28	0.18	0.25	0.07	0	0	0.03	0.06	0.13	0.56	0.45	0.1	0.07	0.13	0.1	0.06	0.11	0.58
XLOC_003790	0.15	0.3	0.48	0.12	0	0.26	0	0.13	0	0.2	0.35	0.16	0.32	0.08	0.29	0.13	0.05	0.64	0.08	0.07	0.2	0.09	0.18	0.32	0.29	0.74	0.04	0.12	0.23	0.31	0.32	0.51	0	0.06	0.14	0	0.06	0.31	0.17	0.25	0	0.04	0.59	0.08	0.31	0.86	0.36	0.46	0
XLOC_003794	0	0	0	0.1	0	0.06	0	0	0	0	0.03	0.39	0.04	0	0	0	0	0	0	0	0	0.16	0	0	0	0.04	0.07	0	0	0.28	0.07	0	0	0	0	0	0	0	0	0	0	0	0	0	0	0	0	0	0
XLOC_003795	0.04	0.01	0.03	0.06	0.19	0.43	0.2	0.07	0.31	0.38	0.46	0.16	0.43	0.27	0.05	0.08	0.31	0.5	0.34	0.21	0.68	0.26	0.17	0.3	1.22	0.5	0.42	0	0	0.49	0.05	0.57	0.37	0.25	0.46	0.56	0.53	0.49	0.16	0.29	0.28	0.04	0.15	0.11	0.35	0.08	0.16	0.32	0.87
XLOC_003799	0	0.05	0	0.06	0	0	0	0	0	0	0.08	0	0	0	0	0	0.05	0	0	0.07	0	0	0	0	0	0.46	0	0	0	0	0	0.19	0	0.11	0	0	0	0	0	0	0	0.21	0	0	0	0	0	0	0
XLOC_003800	0.03	0.02	0.02	0.02	0	0.01	0.02	0.09	0.06	0.17	0.16	0.03	0.04	0.05	0.06	0.03	0.43	0.29	0.33	0.48	0.19	0.51	0.35	0.41	0.43	0.4	0.23	0.46	0.22	0.59	0.35	0.48	0.4	0.49	0.23	0.19	0.08	0.2	0.03	0.18	0.9	0.73	0.65	0.59	0.92	1.01	0.78	0.96	0.41
XLOC_003806	0	0	0	0	0	0	0	0	0.04	0.06	0.38	0	0	0	0.03	0	0	0.23	0.49	0.06	0.05	0	0.1	0.31	0.1	0.1	0.47	0	0.08	0.07	0.1	0.04	0.17	0.04	0.17	0.24	0	0.37	0.07	0	0.17	0	0.2	0.33	0.18	0.18	0.33	0.24	0.2
XLOC_003807	0.08	0.05	0	0	0	0	0	0.07	0.02	0	0.15	0	0.02	0.02	0	0	0.14	0.03	0.12	0.12	0	0.05	0	0.17	0.11	0.09	0.09	0.1	0	0	0.28	0	0.26	0.24	0.07	0.23	0	0	0	0	0.07	0.52	0	0.18	0.02	0.02	0	0.24	0
XLOC_003809	0	0	0	0	0	0	0	0.04	0.05	0.12	0.1	0	0.05	0.13	0.1	0.08	0.03	0.07	0	0.14	0.29	0	0.11	0.12	0.05	0.05	0.34	0.07	0.26	0.8	0.6	0.17	0.1	0.03	0	0.27	0.12	0.19	0	0	0.05	0.05	0.21	0.21	0.38	0.14	0.19	0.06	0.37
XLOC_003814	0.28	0.09	0.1	0.41	0.55	0.12	0.03	0.19	0.06	0.02	0	0	0	0	0	0.04	0	0	0	0	0.06	0.04	0	0	0.02	0.04	0	0.07	0	0.04	0.02	0	0	0.13	0	0	0	0	0	0	0.12	0.17	0.06	0.09	0	0	0.02	0	0
XLOC_003815	0	0.07	0	0	0	0.05	0	0	0	0	0	0	0	0	0	0	0	0	0	0	0	0	0	0	0	0	0	0	0	0	0	0	0	0	0	0	0	0	0	0	0.2	0	0	0.32	0	0	0	0	0
XLOC_003817	0	0	0	0	0	0	0	0	0	0	0	0	0	0	0.03	0	0	0	0	0	0	0	0.05	0.1	0.73	0.12	0	0	0.11	0.03	0.09	0	0	0	0	0.11	0.05	0	0	0	0	0.06	0.03	0	0	0	0	0	0.06
XLOC_003823	0.25	0.1	0.07	0.12	0.1	0.04	0.18	0.13	0.12	0.08	0.05	0.08	0.03	0.03	0.08	0.14	0.07	0.15	0	0.24	0	0	0.04	0	0	0.03	0	0.1	0	0.21	0	0	0.07	0.15	0.18	0.19	0	0.2	0.06	0.17	0.33	0	0.17	0.05	0.03	0.03	0.03	0.3	0
XLOC_003824	0	0.21	0.05	0.16	0.03	0.09	0.03	0.06	1.97	0.95	2.1	1.96	2.15	2.42	1.74	2.1	0.69	1.45	0.24	0.3	0.47	0.63	0.19	0.59	0.4	0.68	0.39	0.59	0.68	0.12	0.15	1.07	1.09	0.86	1.7	1.01	0.65	0.57	1.19	1.24	0.38	0.43	0.13	0.29	0.06	0.6	0.09	0.16	0.66
XLOC_003826	0.18	0.03	0.11	0	0.25	0.02	0	0.04	0.07	0.68	0.42	0.29	0.91	0.68	1.44	0.83	0.02	0.06	0.08	0.05	0.05	0.03	0.24	0.24	0	0	0.15	0.09	0.17	0.1	0.19	0.32	0.43	0.41	0.84	0.51	0.47	0.28	0.84	0.62	0.1	0	0.24	0.13	0.12	0.08	0.05	0.24	0.25
XLOC_003830	0	0.08	0	0	0	0	0	0	0	0	0	0	0	0	0	0	0.21	0.42	0.38	0.42	0.34	0.77	0.05	0.47	0.5	0.32	0.19	0.46	0.27	0.58	0.39	0.53	0.23	0.36	0	0.14	0	0	0.03	0	0.14	0.05	0	0	0.02	0.09	0.1	0.16	0.36
XLOC_003831	0	0.08	0	0	0	0	0	0	0.01	0.03	0	0	0	0	0	0.01	0.72	0.7	1.16	1.26	1.74	0.96	1.12	1.02	1.24	0.89	0.36	0.37	1.23	0.94	0.7	1.08	0.5	0.67	0.11	0.2	0	0.19	0.07	0.05	0.53	0.32	0.55	0.04	0.31	0.34	0.51	0.41	0.66
XLOC_003832	0.38	0.39	0.61	0.37	0.23	0.16	0.41	0.32	0.49	0.3	0.31	0.23	0.19	0.21	0.92	0.51	0.37	0.39	0.11	0.13	0.1	0.21	0.21	0.12	0.16	0.45	0.16	0.13	0.04	0.21	0.2	0.26	0.13	0.24	0.25	0.15	0.42	0.46	0.45	0.46	0.21	0.27	0.03	0.01	0.18	0.03	0.28	0.24	0.15
XLOC_003833	0	0	0	0.23	0	0.07	0	0	0	0	0	0.43	0	0	0	0	0	0	0	0.04	0	0	0	0	0	0	0	0.09	0	0	0	0	0	0	0	0.6	0	0	0	0	0	0	0	0	0	0.05	0	0	0
XLOC_003835	0.02	0.07	0.03	0.2	0.06	0.03	0.19	0.08	0.2	0.35	0.29	0.58	0.37	0.23	0.34	0.25	0.08	0.15	0.12	0.46	0.18	0.03	0.61	0.28	0.1	0.07	0.14	0.26	0.25	0.04	0.26	0.13	0.1	0.16	0.26	0.42	0.37	0.18	0.29	0.62	0	0.05	0.16	0.12	0.04	0.03	0.28	0.01	0.19
XLOC_003836	0	0	0	0	0	0	0	0	0.09	0.17	0.15	0.14	0.03	0.32	0.03	0	0.04	0.05	0	0.03	0	0	0	0	0	0.16	0	0.03	0	0.02	0.06	0	0.04	0.04	0.06	0.03	0.1	0.18	0.1	0.2	0	0	0	0	0	0	0	0	0
XLOC_003838	0	0.06	0.03	0	0	0	0	0.08	0.16	0	0.19	0.47	0.36	0.38	0.3	0.21	0.1	0.07	0.09	0.04	0.08	0	0.04	0.11	0	0.05	0.05	0.14	0.2	0	0.34	0.03	0.36	0.4	0.25	0.09	0.46	1.34	0.41	0.61	0	0	0.03	0.02	0	0	0	0.06	0
XLOC_003839	0.06	0.08	0.04	0.23	0	0.05	0.65	0.16	0.03	0	0.03	0.09	0	0	0	0	0.04	0	0	0	0.11	0	0.05	0.05	0	0.06	0	0	0	0	0	0	0	0	0	0	0	0	0	0	0	0.03	0.07	0	0	0	0	0	0
XLOC_003840	0.95	0.24	0.86	1.36	1.31	1.04	0.95	1.04	0.85	0.29	1.65	1.55	1.48	0.59	1.28	1.44	0.79	1.13	1.31	2.27	1.26	0.97	1.28	1.88	1.03	0.44	1.13	1.73	0.95	0.64	0.79	1.28	1.29	0.5	1.55	2.13	1.12	0.85	1.02	1.33	1.84	0.99	2.3	3.02	1.98	1.49	1.49	1.69	1.27
XLOC_003842	0	0.07	0.07	0.04	0.33	0	0	0.09	0	0.08	0.33	0	0.1	0.16	0.03	0.11	0.03	0	0	0	0.04	0	0	0.21	0	0	0.35	0.08	0.03	0.09	0	0.03	0	0.32	0.14	0.05	0	0.2	0.11	0	0.56	0.13	0.08	0.12	0.11	0.06	0.03	0.07	0.05
XLOC_003847	0.14	0.04	0.04	0.04	0.03	0.1	0.05	0	0.08	0.19	0.04	0.18	0.39	0.24	0.29	0.29	0.28	0.3	0.03	0.22	0.1	0.07	0.13	0.31	0.13	0.35	0.16	0.19	0.21	0.18	0.46	0.21	0.18	0.23	0.16	0.63	0.46	0.17	0.26	0.09	0.05	0.15	0.25	0.37	0.3	0.2	0.02	0.57	0.16
XLOC_003848	0.34	0.29	0.65	0.44	0.2	0.45	0.66	0.32	0.28	0.42	0.5	0.24	0.23	0.18	0.57	0.17	0.14	0.38	0.52	0.39	0.67	0.33	0.84	0.46	0.15	0.25	0.21	0.3	0.25	0.27	0.35	0.23	0.15	0.27	0.15	0.2	0.35	0.63	0.31	0.38	0.36	0.45	0.45	0.08	0.45	0.36	1.16	0.24	0.28
XLOC_003854	0.33	0.2	0.32	0.15	0.36	0.06	0.3	0.11	1.06	0.97	0.71	1.56	1.61	1.69	2.79	2.21	1.08	1.1	0.91	0.42	0.34	0.36	0.48	0.69	1.71	1.43	0.92	0.98	0.4	0.92	0.34	0.51	6.22	1.84	0.45	1.62	0.49	0.59	1.04	0.41	4.44	2.91	1.16	1.12	1.33	0.79	1.03	1.12	2.28
XLOC_003855	0.87	0.02	0.11	0.09	0.18	0.1	0.39	0	0.84	0.38	0.5	0.32	0.81	1.68	1.23	0.42	0.36	0.86	0.55	0.15	0.14	0.11	0.41	0.08	0.71	0.4	0.52	0.16	0.36	0.56	0.02	0.2	0.52	0.11	0.11	0.18	0	0.19	0.52	0.03	2.61	1.2	0.79	0.65	0.16	1.43	0.45	0.31	0.54
XLOC_003857	0.04	0	0	0	0	0	0	0	0.14	0.01	0.47	0.38	0.26	0.28	0.49	0.54	0	0.03	0.07	0	0.05	0	0	0	0.02	0.01	0.04	0	0.02	0	0	0	0.14	0.01	0.03	0.1	0.17	0.05	0	0.16	0	0	0.01	0.01	0	0	0	0.01	0.02
XLOC_003858	0	0.05	0	0.11	0	0.13	0.13	0	0.47	0.3	0	0.04	0.08	0	0.24	0.21	0	0	0.07	0.64	0.46	0	0	0	0.04	0.08	0	0.15	0.32	0	0.16	0.18	0.37	0.59	0.27	0.78	0.06	0.75	0.92	0.49	0.48	0.2	0	0.11	0	0.17	0.3	0.2	0.33
XLOC_003860	0.22	0	0.04	0	0.05	0.28	0.1	0	0.1	0	0.09	0.03	0.03	0.12	0	0.16	0.2	0	0.06	0.11	0.1	0.07	0.04	0.09	0.22	0.06	0.12	0.03	0.1	0	0.03	0	0.04	0.24	0.15	0	0	0.17	0.19	0.12	0	0.3	0	0	0.23	0.53	0.22	0.04	0
XLOC_003862	0	0	0.1	0	0.07	0.12	0.33	0.13	0	0	0	0	0.08	0	0	0	0.05	0	0	0.07	0	0.09	0	0.06	0	0	0.08	0	0	0	0	0.22	0	0	0.07	0	0	0	0	0	0	0	0.32	0.04	0.04	0.04	0.15	0	0
XLOC_003864	0	0.05	0.05	0	0.07	0.23	0.12	0.06	0	0	0.07	0.07	0	0	0.23	0.04	0	0.05	0.07	0.13	0	0	0	0.12	0	0	0.15	0	0	0.08	0.15	0.42	0	0	0	0	0	0	0	0	0	0.19	0	0	0.2	0.53	0	0.05	0
XLOC_003869	0	0	0	0	0	0	0	0	0.01	0.05	0.02	0.05	0.02	0.01	0.02	0.01	0.51	0.68	0.14	0.19	0	0.07	0.01	0.09	0.35	0.45	0.08	0.08	0	0	0.02	0	0.79	0.76	0.17	0.11	0	0.04	0.1	0.12	0.3	0.15	0.29	0.38	0.07	0	0.1	0.16	0.57
XLOC_003873	0	0	0	0	0	0	0	0	0.97	0.58	0.85	0.69	0.32	0.77	0.43	1.04	0.02	0	0	0	0	0	0	0	0	0	0	0	0	0	0	0	0	0.1	0.53	0.32	0.1	0.88	0.52	0.25	0	0	0	0	0	0	0	0	0
XLOC_003874	0.35	0.18	0.27	0.09	0.14	0.07	0.13	0.08	0.1	0.05	0.1	0.09	0.06	0.11	0.14	0.07	0.14	0.04	0.06	0.2	0.03	0.14	0.07	0.12	0.05	0.03	0.24	0.16	0.05	0.03	0.08	0.32	0	0.06	0.13	0.11	0	0.03	0.1	0.03	0.02	0	0.19	0.06	0.15	0.02	0.06	0.18	0.03
XLOC_003875	0	0	0	0	0	0	0	0	0.14	0.11	0.44	0.15	0.27	0.47	0.43	0.33	0.06	0.18	0	0	0.05	0.04	0.02	0.05	0	0	0	0	0	0.02	0	0	0.25	0.32	0.16	0.34	0.12	0.36	0.03	0.36	0	0.03	0.19	0.04	0.03	0	0.08	0.12	0
XLOC_003876	0	0	0	0	0	0	0.01	0	0.67	0.74	0.78	0.95	1.19	0.9	2.25	0.92	3.41	1.33	0.92	1.24	0.9	0.93	0.67	1.19	2.23	2.7	1.41	0.9	0.51	0.98	0.2	0.68	3.24	3.77	0.65	0.92	0.15	0.8	0.94	0.29	3.19	4.26	2.25	1.73	1.38	1.46	1.4	1.15	1.96
XLOC_003877	0.04	0	0.03	0.01	0.05	0	0	0	1.62	0.96	1.5	1.3	1.72	1.97	2.35	1.72	5.6	3.39	2.16	2.37	1.86	2.05	1.2	1.87	5.23	7.16	2.19	2.06	0.91	2.06	0.68	1.32	9.2	9.15	1.37	2.14	0.49	1.67	0.98	0.71	6.8	7.03	3.61	3.64	2.2	2.38	2.46	2.37	3.62
XLOC_003878	0	0.01	0.01	0	0.02	0	0	0	0.65	0.42	0.57	0.74	0.69	0.68	0.85	0.59	1.88	1.44	1.09	1.02	0.8	0.62	0.49	0.88	2.53	2.59	0.96	0.77	0.34	0.96	0.31	0.72	4.28	3.59	0.68	1.07	0.28	0.64	0.43	0.22	3.87	3.95	2.06	1.74	1.46	1.57	1.4	1.11	1.97
XLOC_003886	0	0	0	0	0	0.22	0	0	0.15	0.1	0.03	0.2	0	0.29	0.07	0.18	0	0	0	0	0.06	0	0	0	0	0.03	0.14	0.1	0.04	0	0	0	0.09	0	0	0	0	0.07	0	0.22	0.04	0.24	0	0	0.08	0.19	0.09	0	0
XLOC_003889	0.04	0.1	0.45	0.23	0.25	0.06	0.2	0.13	0.04	0.02	0.08	0	0	0.12	0.02	0	0.08	0.08	0	0.14	0	0.36	0.06	0.06	0.25	0.06	0.45	0.04	0.05	0	0.08	0	0.21	0.11	0.07	0.07	0	0.08	0	0	0.16	0.02	0.04	0.06	0.3	0.04	0	0.02	0.12
XLOC_003891	0	0	0	0	0	0	0	0	0.03	0	0.18	0	0	0	0	0	1.43	0.82	0.62	0.95	0.73	0.55	0.4	0.37	0.85	0.71	0.29	0.33	0.14	0.23	0.03	0.19	0.52	0.34	0.06	0.03	0	0.16	0.02	0.03	0.02	0.07	0.03	0.06	0.07	0.03	0.11	0.08	0.61
XLOC_003895	0.05	0	0	0	0.1	0	0	0	0.11	0.17	0.34	0.08	0.01	0.07	0	0.03	0.33	0.71	0.25	0.21	0.29	0.41	0.23	0.27	0.59	0.25	0.1	0.03	0.05	0.06	0.04	0.27	0.46	0.34	0.25	0	0.08	0.13	0.14	0.03	0.84	0.35	0.12	0.12	0.04	0	0.18	0.07	0.58
XLOC_003896	0	0	0	0	0	0	0	0	0	0	0.39	0	0	0.04	0.02	0	0	0.03	0	0	0	0	0	0	0	0	0	0	0	0	0	0	0	0	0.29	0	0.41	0	0.09	0	0	0	0	0	0	0	0	0	0
XLOC_003898	0.03	0.02	0	0.1	0.03	0	0.12	0	0.02	0.02	0.2	0.14	0	0	0	0	1.03	0.96	0.97	0.69	0.43	0.43	0.56	0.66	1.49	0.54	0.4	0.35	0.08	0.36	0.22	0.35	2.57	2.35	0.3	0.78	0	0.1	0.07	0.14	0.04	0.26	0	0.37	0	0	0.09	0	0.83
XLOC_003901	0	0.04	0	0.09	0	0.05	0	0.05	0	0	0.03	0.03	0.03	0	0.13	0	0	0	0	0.06	0.05	0	0	0.15	0	0.13	0.03	0	0.04	0.07	0	0	0	0.31	0.22	0.06	0.1	0	0	0	0	0	0	0.45	0	0.28	0	0	0
XLOC_003903	0.17	0.03	0.03	0.06	0.02	0.17	0.13	0.09	1.09	1.16	0.11	0.51	0.58	0.69	0.52	0.63	1.17	0.67	0.12	0.23	0.28	0.47	0.75	0.31	0.32	0.7	0.07	0.44	0.06	0.7	0.32	0.16	0.47	0.45	0.07	0.19	0.52	0.85	0.36	0.43	0.36	0.34	0	0.23	0.17	0.19	0.31	0.03	0.52
XLOC_003906	0.59	1.67	1.12	1.22	0.76	1.06	1.09	0.4	0.35	0.24	0.36	0.39	0.59	0.39	0.61	0.61	0.16	0.07	0.32	0.13	0.21	0.11	0.11	0	0.2	0.1	1.05	0.24	0.11	0.05	0.12	0.25	0.16	0.2	0.21	0.36	0.2	0.19	0.32	0	0.03	0.05	0.08	0.25	0.14	0.16	0.03	0.15	0.05
XLOC_003914	0	0	0	0	0	0	0	0	0.03	0.09	0	0.38	0.12	0.46	0.12	0.25	0	0	0	0	0	0	0	0	0	0	0	0	0	0	0	0	0.79	0.81	0.05	0.27	0.33	0.06	0.19	0.18	0.03	0	0	0.06	0	0	0	0	0
XLOC_003918	0.23	0.1	0.23	0.07	0.07	0.39	0.03	0.08	0.4	0.14	0.36	0.21	0.1	0.22	0.27	0.25	0.15	0.81	0.29	0.31	0.23	0.57	0.16	0.32	0.62	0.11	0.27	0.08	0.1	0.34	0.5	0.2	0.81	0.11	0.24	0.24	0.24	0.19	0.32	0.24	0.86	0.42	0.13	0.28	0.14	0.58	0.4	0.38	0.65
XLOC_003922	0	0	0.04	0.02	0	0	0.03	0	0.03	0.06	0.03	0.06	0.03	0.02	0	0.05	0.04	0.02	0	0.13	0.1	0.13	0.15	0.14	0	0.03	0.12	0.06	0.31	0.11	0	0.02	0.06	0.1	0.36	0	0.3	0.34	0.13	0.06	0.08	0.04	0.14	0.16	0.02	0	0.31	0.07	0
XLOC_003923	0.09	0.12	0.03	0.1	0.13	0.18	0.04	0.04	0.02	0	0.09	0.02	0.14	0.07	0	0.12	0.09	0.23	0	0	0.04	0.21	0.03	0.07	0.02	0	0.02	0.07	0	0.05	0.07	0	0	0.13	0	0.17	0	0.09	0	0	0.09	0	0.33	0.28	0.33	0.05	0.52	0.12	0.1
XLOC_003925	0.17	0.33	0.29	0.25	0.72	0.37	0.68	0.51	0.24	0.16	0.12	0.26	0.13	0.26	0.1	0.17	0.03	0.06	0.19	0.2	0.25	0.16	0.13	0.21	0.15	0.05	0.05	0.28	0.24	0.06	0.24	0.32	0.17	0.07	0.12	0.33	0.04	0.27	0.28	0.12	0.16	0.14	0.06	0.09	0.14	0.17	0.11	0.13	0.14
XLOC_003932	0.22	0.07	0	0	0	0.02	0.14	0.04	0.01	0.03	0.05	0.08	0.21	0.22	0.05	0.03	0.07	0.21	0.02	0	0.04	0.06	0.06	0.04	0	0.05	0	0.14	0.02	0.03	0.17	0.06	0.69	0	0.05	0.12	0.08	0	0.03	0	0.23	0	0.03	0	0.09	0.28	0.02	0	0.17
XLOC_003936	0	0.02	0.01	0.04	0.03	0	0.07	0.03	0	0.02	0.01	0	0	0.03	0.01	0	0.04	0.18	0.41	0.16	0.37	0.33	0.1	0.4	0.09	0	0.18	0.06	0.13	0.27	0.14	0.07	0	0	0	0.01	0	0	0.04	0	0.09	0	0	0.01	0.07	0.02	0	0.06	0.09
XLOC_003937	0	0	0	0	0	0	0	0	0	0	0	0	0	0	0	0	0.05	0.06	0	0	0	0	0	0.06	0.53	0.08	0	0	0	0	0	0.04	0	0	0	0	0	0	0	0	0	0	0.12	0	0	0	0	0	0.16
XLOC_003940	0	0	0	0	0	0	0	0	0.11	0.09	0.04	0.04	0.22	0.15	0.04	0.01	0.06	0.19	0.41	0.34	0.96	0.49	0.24	0.23	0.04	0.04	0.68	0.33	0.81	0.54	0.27	0.31	0.07	0.08	0.04	0.25	0.25	0.33	0.09	0	0.16	0.01	0.31	0.5	0.4	0.49	0.6	0.3	0.18
XLOC_003942	0.35	0.46	0.49	0.48	0.74	0.6	0.44	0.9	0.9	0.84	2.93	0.86	0.54	0.59	0.71	0.83	4.46	5.54	7.31	5.1	6.43	7.15	9.4	8.66	5.2	4.99	4.58	5.33	4.85	4.72	7.7	7.26	3.06	3.25	1.74	1.14	1.09	2.43	2.04	2.48	2.88	1.64	1.67	2.6	1.91	2.23	2.9	2.14	4.65
XLOC_003943	0.01	0.01	0	0	0	0	0	0.01	0.01	0.01	0.11	0	0	0	0	0.01	0.29	0.33	0.53	0.33	0.3	0.39	0.25	0.21	0.65	0.14	0.08	0.06	0.13	0.29	0.17	0.33	0.64	0.26	0.14	0.04	0.01	0.15	0.06	0.07	0.18	0.06	0.27	0.49	0.09	0.07	0.21	0.2	0.46
XLOC_003944	0.78	0.45	0.4	0.83	0.25	0.12	0.85	0.11	0.01	0	0.01	0	0.01	0.02	0	0	0	0.02	0	0	0	0.04	0	0	0	0	0	0	0.01	0.01	0	0	0.03	0.06	0.02	0	0	0	0	0	0.05	0	0.02	0.01	0	0.04	0.03	0.03	0
XLOC_003950	0	0.02	0.05	0.03	0	0.03	0	0.06	0.17	0.26	0.25	0.12	0.25	0.37	0.14	0.13	0.3	0.35	0.07	0	0.27	0.12	0.05	0.14	0.29	0.2	0.06	0.07	0.18	0.04	0.09	0	0.14	0.46	0.18	0.03	0.31	0.37	0.42	0.11	0.14	0.13	0.02	0.03	0.19	0	0	0.02	0.3
XLOC_003951	0.17	0.27	0.4	0.71	0.19	0.73	0.33	0.37	0.31	0.12	0.04	0.34	0.3	0.08	1.16	0.83	0.06	0.04	0.06	0.16	0	0.27	0.31	0.05	0.03	0.28	0.41	0.01	0.07	0.4	0.24	0.27	0.3	0.31	0.92	0.36	0.17	0.78	0.62	1.01	0.03	0.03	0.14	0.32	0.1	0.51	0.19	0.19	0
XLOC_003954	0	0	0	0	0	0	0.07	0	0.02	0	0.36	0.14	0.12	0.13	0.04	0.07	0.3	0.85	0.81	0.52	0.79	0.46	0.27	0.75	0.92	0.77	0.32	0.59	0.12	0.2	0.39	0.28	0.28	0.17	0.07	0.04	0.07	0.32	0	0.04	1.07	0.71	0.58	0.19	0.23	0.34	0.52	0.72	1.16
XLOC_003956	0	0	0	0	0.14	0.04	0	0.29	0	0.05	0.72	0.24	0.4	0.94	1.4	1.17	0	0	0.09	0	0	0	0.11	0.08	0	0	0	0	0.09	0	0	0.91	0.07	0	2.11	0.81	2.82	2.05	2.08	5.1	0	0	0	0.02	0.14	0.11	2.29	0.31	0
XLOC_003958	0	0.02	0.04	0.09	0.06	0	0.13	0	0.03	0	0.03	0.03	0.03	0.03	0.03	0.03	0.08	0.18	0.18	0	0	0.14	0.28	0.15	0	0	0.26	0.12	0.11	0.17	0.2	0.14	0	0.17	0	0	0	0.06	0.1	0	0	0.08	0.33	0.01	0.07	0.09	0.36	0.22	0.13
XLOC_003960	0.75	0.72	0.61	0.46	0.21	0.51	0.2	0.57	0.19	0.73	0.11	0.03	0.14	0	0.24	0.46	0	0.08	0.38	0.16	0.29	0.39	0.17	0.18	0.12	0.32	0.18	0.17	0.47	0.13	0.2	0.56	0.39	0.39	0.2	0.1	0.05	0.28	0.06	0.54	0.62	0.41	0.99	0.38	0.35	0.39	0.87	0.76	0.3
XLOC_003963	0	0	0	0.01	0	0	0	0	0.13	0.28	0.3	0.24	0.67	0.61	0.14	0.25	0.42	0.01	0.21	0.12	0.2	0.12	0.08	0.1	0.04	0.38	0.15	0.25	0.14	0.05	0	0.04	0	0.23	0.08	0.09	0.19	0.12	0.17	0.05	0.05	0.33	0.13	0.06	0	0.03	0	0	0.04
XLOC_003964	0.08	0	0	0	0	0	0	0	0.05	0.04	0	0	0	0.05	0	0	0	0	0	0	0	0	0	0.14	0	0	0	0	0	0	0	0.69	0	0	0	0	0	0	0	0	0	0	0	0	0	0	0	0	0
XLOC_003967	0	0	0	0.11	0.11	0	0.02	0.08	0.17	0.34	0.16	0.23	0.09	0.13	0.21	0.3	0.27	0.23	0.05	0.04	0	0.14	0.05	0.12	0.08	0.11	0.15	0.32	0.04	0.03	0.16	0.14	0.05	0.07	0.32	0.07	0.1	0.37	0.68	0.38	0.05	0	0.01	0.05	0.08	0.01	0	0.17	0.2
XLOC_003968	0	0	0	0.19	0	0	0	0.04	0	0.15	0.2	0	0.15	0	0.1	0.16	0.07	0.18	0	0.28	0.04	0	0.56	0.16	0.26	0.34	0.21	0.12	0.65	0.14	0.1	0.52	0.2	0.49	0.09	0.23	0.65	0.1	0.22	0	0.29	0.15	0.08	0.5	0.89	0.45	1.02	0.54	0.05
XLOC_003970	0.52	0.47	0.45	0.42	0.85	1	0.74	0.36	0.62	0.65	0.31	0.55	0.45	0.59	0.31	0.27	0.14	0.22	0.1	0.06	0.09	0.08	0.1	0.16	0.2	0	0.06	0.04	0.01	0.08	0.05	0.07	0.19	0.2	0.37	0.53	0.37	0.34	0.5	0.41	1.06	0.8	0.77	0.55	1.01	0.88	0.84	0.74	0.1
XLOC_003971	15.85	17.27	8.87	12.42	10.34	16.45	5.77	14.24	1.25	0.68	0.66	0.99	0.75	1.61	1.23	1.39	0.34	0.56	1.03	0.46	0.46	0.42	0.73	1.06	0.48	0.14	0.75	0.56	0.81	0.98	0.32	0.37	0.48	0.59	0.95	1.33	0.68	1.15	1.14	0.54	0.38	0.43	0.23	1.07	0.49	0.25	0.62	0.39	0.07
XLOC_003974	0	0	0.06	0	0	0.04	0.04	0.07	0.46	0.32	0.17	0.06	0.29	0.09	0.16	0.09	0.26	0.09	0.12	0.16	0	0.15	0.03	0.04	0.23	0.18	0.21	0.15	0.28	0.07	0.02	0.2	0.38	0.27	0	0.04	0.11	0.08	0.14	0.28	0.05	0.02	0	0	0	0.15	0.31	0.11	0.05
XLOC_003979	0.87	0.87	2.35	2.91	2.03	2.02	1.31	1.51	0.38	0.89	0.67	0.29	0.52	0.94	0.84	0.51	0.43	0.53	0.19	0.67	0.87	0.39	0.33	0.79	0.52	0.38	0.31	0.43	0.32	0.19	0.42	0	0.77	0.82	0.39	1.12	0.16	1.14	0.48	1.04	0.41	0.73	0.59	0.14	0.46	0.78	0.84	0.59	0.47
XLOC_003984	2.66	2.43	1.81	1.91	0.86	1.46	1.93	1.21	0.39	0.12	0.86	0.31	0.44	0.59	0.39	0.28	1.3	2.06	3.01	4.92	2.97	2.8	3.25	4.04	1.47	0.97	2.18	4.28	2.15	1.79	2.19	2	0.67	0.8	0.36	0.28	0.16	0.26	0.55	0.2	1.62	1.65	1.75	2.91	2.5	1.39	2.35	2.52	2.18
XLOC_003986	0	0	0	0	0	0	0	0	0	0	0	0.48	0.03	0.07	0.07	0	0	0.2	0	0	0	0	0	0	0	0	0	0	0	0	0	0	0	0	0	0.13	0.06	0.07	0	0.51	0	0	0	0	0	0	0	0	0
XLOC_003995	0.07	0.06	0.06	0.05	0.08	0.06	0.06	0.06	0.19	0.12	0.29	0.2	0.19	0.13	0.17	0.12	1.44	1.58	1.64	1.46	1.25	0.57	0.97	0.72	1.41	1.05	0.94	1.13	0.71	0.57	0.56	0.6	1.82	0.88	0.27	0.12	0.12	0.2	0.11	0.06	5.69	5.37	2.57	2.33	2.52	1.67	2.63	1.88	2.58
XLOC_003996	0	0	0	0	0	0	0	0	0	0	0	0	0	0	0	0	0	0	0.07	0.06	0.06	0	0	0.11	0.59	0	0	0	0	0	0.18	0	0	0	0	0	0	0	0	0	0	0	0	0	0	0	0	0	0
XLOC_003999	0	0	0.11	0	0	0.03	0	0	0.02	0.23	0.14	0.02	0.04	0.11	0.04	0.11	0.22	0.06	0	0.19	0.04	0.14	0.09	0.17	0.09	0.19	0.37	0.29	0	0.19	0	0.05	0	0.09	0	0.15	0.03	0.04	0	0.22	0	0.45	0	0.12	0.12	0.45	0.03	0.05	0.04
XLOC_004012	0.14	0.19	0.35	0.27	0.13	0.12	0.32	0.12	0.08	0.32	0	0	0	0.04	0.11	0.04	0.05	0.32	0.07	0	0	0	0	0.12	0	0.08	0.12	0.11	0.09	0.08	0.15	0	0.05	0.15	0.26	0	0	0	0	0	0	0	0.38	0	0.12	0	0.05	0	0.08
XLOC_004016	0	0	0	0	0	0	0	0	0.27	0	0.02	0	0.17	0.16	0	0.07	0	0	0	0	0	0	0	0	0	0	0	0	0	0	0	0	0	0	0	0.18	0.03	0	0	0	0	0	0	0	0	0	0	0	0
XLOC_004017	0.11	0.34	0.26	0.24	0.61	0.18	0.12	0.45	0.06	0.35	0.15	0.2	0.37	0.27	0.35	0.38	0.32	0.23	0.13	0.15	0.31	0.21	0.24	0.13	0.16	0.16	0.18	0.18	0.48	0.3	0.3	0.31	0.34	0.22	0.48	0.41	0.13	0.41	0.55	0.19	0.05	0.13	0.05	0.06	0.22	0.31	0.09	0.24	0.11
XLOC_004024	0	0	0	0	0	0	0	0	0	0.05	0.31	0.18	0.35	0.19	0	0	0	0	0	0	0	0	0	0	0	0	0	0	0	0	0	0	0	0.02	0.04	0	0	0	0	0	0	0	0	0	0	0	0	0	0
XLOC_004028	0	0	0	0	0	0	0	0	0	0	0	0	0	0	0	0	0	0	0	0	0	0	0.12	0	0	0	0	0	0	0	0.08	0	0	0	0	0.14	0	0	0	0	0	0	0	0	0	0	0	0	0
XLOC_004029	0	0	0	0	0	0	0	0	0.11	0.1	0.03	0.19	0	0	0.4	0.25	0.17	0.09	0	0	0	0	0.1	0.16	0.34	0.1	0.2	0	0	0.04	0	0	0.26	0.22	0.28	0	0.05	0.25	0.14	0.34	0.03	0.07	0.1	0.18	0	0	0.08	0	0
XLOC_004032	0	0	0	0	0	0	0	0	0	0	0	0	0	0	0.04	0	0	0	0.15	0.07	0.07	0	0.06	0	0	0	0	0.63	0.14	0	0.04	0.37	0	0	0	0	0	1.01	0	0	0.08	0	0.13	0	0	0	0	0	0
XLOC_004033	0.18	0	0.13	0	0.14	0	0	0.03	0.09	0.1	0.13	0.06	0.08	0.02	0.06	0.25	0.1	0.25	0.04	0.07	0.07	0.04	0.17	0.06	0.39	0.04	0.27	0.06	0	0.02	0.1	0.11	0.26	0.05	0	0.04	0	0	0	0	0.06	0.1	0.2	0.02	0.04	0	0.1	0	0.04
XLOC_004034	0	0.02	0	0	0	0	0	0	0.08	0	0	0.04	0.01	0.01	0.05	0.02	0.02	0.13	0.22	0.03	0.07	0.02	0.05	0.32	0.06	0	0.05	0	0	0.04	0	0.02	0	0	0	0	0	0	0	0	0	0	0.01	0.1	0.02	0	0	0	0.13
XLOC_004036	0.09	0	0	0	0.13	0	0	0	0.05	0.34	0.29	0	0	0.14	0.05	0.02	0.03	0	0.13	0.12	0.04	0	0	0	0.1	0	0	0.04	0	0.05	0.16	0	0.06	0.09	0.12	0.17	0.11	0.8	0.05	0	0	0.19	0	0.13	0	0.03	0	0.03	0.1
XLOC_004037	0	0	0	0	0	0	0.01	0.05	0.03	0	0.06	0.05	0.01	0.01	0.01	0.01	0.48	0.38	0.23	0.38	0.16	0.19	0.28	0.15	0.23	0.27	0.09	0.18	0.14	0.1	0.15	0.06	0.16	0.3	0.06	0.09	0.05	0.05	0.04	0.01	0.34	0.55	0.14	0.19	0.17	0.1	0.17	0.1	0.38
XLOC_004038	0	0.03	0	0	0	0	0.04	0.12	0	0.1	0.07	0	0.02	0.08	0.35	0.03	0.06	0.1	0	0.04	0.16	0.22	0.04	0	0	0	0	0	0	0	0	0.64	0	0.03	0.08	0.13	0	0	0	0	0.02	0.05	0.08	0.3	0.05	0.05	0.06	0.06	0
XLOC_004040	0.15	0.1	0.12	0.1	0	0.11	0.08	0.27	0.07	0.05	0.15	0.09	0	0.13	0.1	0.08	0.06	0.06	0.32	0.16	0.03	0.07	0.1	0.16	0.04	0.18	0.08	0.07	0	0.1	0.33	0.25	0	0.13	0.42	0.3	0	0.3	0.1	0.26	0.03	0.05	0.53	0.13	0	0.17	0.22	0.38	0.11
XLOC_004041	0	0	0.01	0	0	0	0	0	0.23	0.2	0.1	0.32	0.25	0.11	0.24	0.19	0.17	0.4	0.06	0.12	0.2	0.05	0.08	0.14	0.25	0.14	0.31	0.24	0.23	0.19	0.02	0.08	0.07	0.06	0.06	0.17	0.1	0.02	0.34	0.22	0.15	0	0.12	0.12	0.02	0	0.08	0.11	0.24
XLOC_004048	0.26	0.28	0.56	0.12	0.25	0.09	0.14	0.05	0.06	0.14	0.05	0.14	0.08	0.17	0.11	0.18	0.11	0.08	0.1	0.2	0.09	0.19	0.08	0.22	0.12	0	0.06	0.11	0.13	0.25	0	0	0.3	0.5	0.14	0.2	0	0.11	0.06	0	0.14	0.06	0.12	0.31	0.15	0.03	0.38	0	0
XLOC_004049	0.06	0.14	0.24	0.08	1.45	0.25	0.27	0.74	0.06	0.12	0.16	0.29	0.52	0.24	0.13	0.88	0.03	0.02	0.02	0.07	0.02	0.08	0.02	0.07	0.04	0.03	0.04	0.01	0.07	0.01	0.01	0.13	0.02	0.04	0.03	0.1	0.31	0.09	0.09	0.53	0.02	0.01	0	0.02	0	0.06	0.02	0.04	0
XLOC_004051	0	0	0	0	0	0	0.02	0	0	0	0	0.01	0	0.01	0.01	0.01	0.1	0	0	0.32	0	0	0.26	0.2	0	0	0	0.07	0	0	0.14	0	0	0	0.02	0	0	0	0	0	0	0	0.03	0.05	0	0	0.03	0	0
XLOC_004052	0	0	0	0	0	0	0.06	0	0	0	0.07	0	0	0.04	0	0.2	0.05	0	0	0.13	0	0.08	0.11	0	0	0	0	0	0	0	0	0.25	0	0	0	0	0	0.07	0	0.08	0	0	0	0	0	0	0	0	0
XLOC_004057	0.48	0.06	0.21	0.19	0.19	0.12	0.09	0	0.08	0.45	0.67	0.05	0.18	0.67	0.37	0.36	0.51	0.59	0.1	0.28	0.26	0.58	0.72	0.41	0.35	0.26	0.21	0.77	0.45	0.2	0	0.03	0.03	0.28	0.18	0	0.12	0.49	0.61	0	0.05	0.26	0.35	0.22	0.37	0.17	0.26	0.42	0.16
XLOC_004060	0	0	0.04	0.13	0	0.05	0.1	0.05	0	0	0	0.06	0	0	0	0	0	0.34	0	0	0	0	0.35	0	0	0	0	0.26	0	0.43	0	0	0	0	0	0	0	0	0	0	0	0	0	0.22	0.23	0	0	0	0.19
XLOC_004062	0	0.05	0.19	0.19	0.16	0.2	0.15	0.13	0.25	0.15	0.06	0.14	0.23	0.12	0.08	0.31	0.05	0.05	0.05	0.09	0.11	0.06	0.34	0.46	0.03	0.06	0.12	0.02	0.03	0.07	0.18	0.17	0	0.21	0.18	0.12	0.18	0.22	0.03	0.32	0.13	0.12	0.17	0.15	0.1	0.26	0.45	0.3	0.11
XLOC_004063	0.55	0.15	0.18	0.04	0.41	0.26	0.39	0.33	0.13	0.17	0.05	0.16	0.09	0.11	0.48	0.13	0.44	0.33	0.33	0.41	0.16	0.03	0.24	0.02	0.4	0.2	0.14	0.27	0.15	0	0.72	0.53	0.32	0.26	0.37	0.24	0.04	0	0.09	0.11	0.27	0.12	0.07	0.23	0.18	0.54	0.12	0.15	0.31
XLOC_004064	0	0	0	0	0	0	0	0	0.05	0	0.04	0.04	0.08	0.04	0.09	0	0.17	0.3	0	0	0	0.19	0.12	0.13	0.09	0.04	0	0	0	0	0	0	0.06	0	0	0	0	0.08	0	0	0.56	0	0	0	0	0	0	0	0.09
XLOC_004065	0	0.23	0	0	0.2	0	0.03	0	0.08	0.12	0.16	0.09	0.04	0.02	0	0.04	0.05	0.42	0	0	0.03	0	0.05	0.03	0.06	0.33	0	0	0.15	0	0	0.04	0.05	0.1	0	0	0.03	0.07	0	0.11	0.15	0.17	0	0.02	0.32	0	0	0.02	0.19
XLOC_004066	0	0.12	0	0	0	0	0.17	0.32	0.07	0	0	0.16	0	0	0	0.03	0.09	0	0	0	0	0	0.14	0.1	0	0	0	0.16	0	0	0	0	0	0	0	0	0.26	0	0	0	0	0	0	0.06	0	0.58	0	0.12	0
XLOC_004067	0	0	0.03	0	0	0	0	0	0	0	0.08	0.06	0.28	0.25	0.08	0.06	0.08	0.52	0.04	0.15	0.24	0.09	0.09	0.29	0.06	0	0.31	0.39	0.09	0.31	0	0	0.03	0	0	0	0.16	0	0.26	0	0	0	0.08	0	0	0.02	0	0	0.08
XLOC_004070	0	0	0	0	0	0	0	0	0	0	0	0	0	0	0	0	0.32	0.2	0.03	0.46	0.23	0.15	0.25	0.27	0.27	0.44	0.23	0.66	0.12	0.34	0.39	0	0.25	0.26	0	0	0	0	0	0	0.11	0.07	0	0.03	0.26	0	0.02	0	0.25
XLOC_004074	0.02	0.03	0.01	0.03	0.02	0	0.09	0.03	0	0	0	0	0	0	0	0	0.05	0.07	0.04	0.04	0.05	0.05	0.17	0.03	0.01	0	0.11	0.01	0	0.02	0	0.02	0	0	0	0	0	0	0	0	0.02	0	0	0	0	0	0.01	0.04	0
XLOC_004079	0.09	0.17	0.12	0.19	0.37	0.2	0.28	0.25	0.07	0.03	0.21	0.08	0.1	0.21	0.06	0.06	0.05	0.1	0.06	0.11	0.26	0.23	0.06	0.26	0.09	0.28	0.19	0.02	0.42	0.78	0.58	0.35	0.23	0.18	0.32	0.31	0.41	0.43	0.25	0.61	0.16	0.36	0.27	0.09	0.36	0.41	0.14	0.18	0.08
XLOC_004080	0.44	0.47	0.58	0.73	0.7	0.84	0.56	0.91	0.04	0.03	0.2	0.17	0.02	0.05	0.09	0.07	0.05	0.1	0.04	0.1	0.06	0.23	0.13	0.11	0.1	0.06	0.1	0.05	0	0.11	0.04	0.04	0.08	0.03	0.11	0.06	0.03	0.09	0.02	0.12	0.02	0.05	0.08	0.05	0	0.22	0.11	0.05	0.11
XLOC_004081	0	0.02	0	0	0	0	0	0	0.06	0.04	0.02	0.02	0	0	0.11	0.06	0.19	0.37	0.07	0.07	0.09	0	0.05	0.14	0.38	0.37	0	0.11	0.11	0.04	0	0	0.12	0.15	0.06	0.03	0	0.04	0	0	0	0.19	0	0.02	0	0	0	0	0.23
XLOC_004084	0.19	0	0.03	0.06	0	0.13	0.1	0.07	0.09	0.18	0.08	0.14	0.36	0.4	0.04	0.24	0.45	0.11	0.04	0.18	0.17	0.22	0.47	0.13	0.04	0.3	0.25	0.02	0.07	0.07	0.3	0.16	0.08	0.14	0.1	0.07	0.35	0.46	0.09	0	0.08	0	0.35	0.3	0.04	0.29	0.3	0.35	0.08
XLOC_004085	0.25	0.17	0	0.58	0	0.16	0.11	0.11	0.14	0	0	0	0	0	0	0.11	0.22	0.05	0	0	0	0.15	0	0	0.24	0	0	0	0	0	0	0.41	0	0.18	0	0	0	0	0	0	0	0	0	0	0	0	0.17	0.42	0.14
XLOC_004087	0.06	0.11	0.07	0.07	0.22	0.08	0.03	0.03	0.45	0.66	0.37	0.51	1.22	1.37	1.06	0.53	0.14	0.05	0.01	0.03	0	0.04	0	0	0.06	0.02	0.07	0.08	0.04	0.12	0	0.08	0.2	0.07	0.21	0.12	0.29	0.2	0.65	0.1	0.05	0.02	0.04	0.06	0.14	0.07	0.13	0.02	0.02
XLOC_004088	0.04	0.03	0.06	0.02	0.02	0.05	0.04	0.08	0.3	0.46	0.17	0.28	0.5	0.31	0.38	0.33	0.12	0	0.02	0	0.07	0.07	0.05	0	0	0.16	0.02	0.05	0	0	0	0	0.21	0.09	0.05	0.19	0.16	0.18	0.29	0.09	0	0	0.04	0.08	0	0.02	0	0.01	0
XLOC_004090	0	0.52	0.07	0.3	0.09	0.08	0.09	0.29	0.5	0.18	0.4	1.03	0.69	1.1	0.37	0.77	0.14	0	0	0	0.17	0.06	0.04	0.08	0.32	0.05	0	0	0	0.03	0.79	0.32	0.45	0.35	1.11	1.26	0.25	0.59	0.5	0.7	0.16	0.18	0	0.29	0.17	0.09	0.29	0	0
XLOC_004091	0.16	0.11	0.23	0	0	0.21	0	0.21	0.05	0.34	0	0.59	0.35	0.23	0.22	0.09	0	0	0	0.08	0.07	0	0	0	0	0	0	0.25	0.7	0.1	0	0	0.23	0.24	0.22	0.94	0.21	0.99	0.19	0.18	0.04	0	0	0	0	0.19	0	0	0
XLOC_004092	0.43	0.7	1.74	0.74	0.5	0.73	0.36	0.64	0.73	0.59	0.91	0.84	0.27	0.57	0.49	0.51	0.46	0.44	1.17	0.69	0.27	0.36	0.41	0.57	0.42	0.91	1.56	0.62	0.55	0.29	0.25	0.7	0.47	0.55	0.99	0.63	0.37	0.63	0.36	0.75	0.45	0.25	0.79	0.78	0.52	0.51	0.24	0.32	0.33
XLOC_004099	0.16	0.79	1.22	0.54	0.78	1.55	0.39	0.51	0.59	0.5	0.96	0.45	0.86	0.78	0.99	0.49	1.32	0.65	1.02	1.08	1.05	0.71	1.26	0.99	0.77	2.23	0.92	0.11	0.79	1.07	1.05	0.65	1.8	1.6	0.25	0.31	0.45	0.22	0.67	0.42	1.22	0.98	0.38	0.61	0.81	0.35	1.15	1.29	1.13
XLOC_004103	0.07	0.03	0.05	0	0	0.61	0.14	0.14	0	0.03	0.01	0	0	0.04	0	0.03	0	0	0.04	0	0.04	0.16	0.14	0.09	0	0.02	0	0	0.03	0.21	0.02	0.03	0	0.02	0	0	0.04	0.14	0	0	0	0.02	0.1	0.01	0	0.05	0.07	0.06	0
XLOC_004106	0	0	0	0	0	0	0	0	0.31	0.04	0	0	0	0.02	0	0	0.03	0	0	0	0	0	0	0	0	0	0	0.02	0	0	0	0	0.3	0	0.08	0	0.04	0.3	0	0.09	0	0	0	0	0	0	0	0	0
XLOC_004107	0.31	0.04	0.29	0.12	0	0.03	0.11	0.19	0.05	0.1	0.03	0.19	0.1	0.36	0	0.58	0.04	0.07	0.09	0.06	0.08	0.07	0.07	0.16	0.22	0.2	0.26	0.51	0.04	0.42	0.1	0.02	0.22	0.14	0.14	0.03	0.05	0.06	0.14	0	0.18	0.57	0.24	0.42	0	0.28	0.17	0.04	0.07
XLOC_004108	0.26	0.12	0.16	0	0	0.23	0.16	0.19	0.08	0	0.16	0.14	0.14	0.22	0.12	0.2	0.12	0.13	0.04	0.04	0.04	0.27	0.03	0.04	0.02	0.07	0.49	0.14	0.03	0.1	0.19	0.43	0.03	0.06	0	0.09	0	0	0.2	0.15	0.1	0.24	0.51	0.29	0.1	0.24	0.44	0.18	0
XLOC_004111	0.92	1.56	0.78	1.09	1.38	2	0.85	1.52	0.01	0.03	0.01	0.01	0.03	0.02	0.05	0.02	0.15	0.12	0.06	0.06	0.09	0	0.04	0.06	0.07	0.03	0.05	0.05	0.01	0.01	0.02	0.03	0.03	0.02	0.02	0.01	0.02	0.01	0.01	0	0.11	0.05	0.01	0.02	0	0.06	0.02	0.09	0.07
XLOC_004113	0	0.05	0	0	0	0	0	0.12	0.04	0.07	0	0.22	0.04	0.04	0.23	0.04	0	0.16	0	0.14	0	0	0.17	0.06	0	0	0.36	0	0.26	0.38	0	0	0.15	0.16	0.26	0.21	0	0	0.33	0.48	0.12	0	0	0	0.25	0	0	0.05	0.32
XLOC_004116	0	0	0	0	0	0	0	0	0	0	0.25	0.03	0	0	0	0	0.1	0.63	0.29	0.84	0.82	0.12	0.57	0.49	0.53	0.65	0.05	0.4	0.39	0.09	0.38	0.47	0.45	0.14	0	0.05	0	0.1	0.11	0	0.05	0.44	0.11	0.58	0	0.03	0.29	0.29	0.7
XLOC_004118	0.18	0.21	0.11	0.2	0.23	0.37	0.15	0.17	0.36	0.53	0.8	0.58	0.42	0.54	0.57	1.2	0	0.03	0.34	0.1	0.45	0.24	0.31	0.42	0.06	0.11	0.48	0.06	0.31	0.62	0.22	0.68	0.64	0.91	1.13	1	0.78	2.57	0.91	2.23	0.02	0.19	0.56	0.69	0.44	0.48	0.63	1.11	0.09
XLOC_004121	0.46	0.3	0.22	0.36	0.32	0.44	0.09	0.3	0.19	0.13	0.21	0.25	0.19	0.4	0.39	0.18	0.11	0.15	0.08	0.15	0.07	0.23	0.17	0.08	0.24	0.09	0.09	0.08	0.1	0.32	0.03	0.22	0.1	0.27	0.05	0.19	0.13	0.34	0.18	0.17	0.19	0.08	0.29	0.05	0.37	0.32	0.19	0.3	0.06
XLOC_004131	0.26	0.43	0.5	0.36	0.67	0.68	0.16	0.93	0.45	0.4	0.85	0.44	0.44	0.82	0.56	0.98	0.05	0.12	0.33	0.19	0.5	0.56	0.35	0.19	0.11	0.01	0.42	0.16	0.67	0.56	0.49	1.57	0.89	0.99	1.97	1.5	1.32	2.2	1.02	3.95	0.06	0.38	0.76	0.51	0.42	0.44	0.83	1.08	0.15
XLOC_004132	0	0	0.05	0.03	0.04	0	0.17	0.16	0.07	0.18	0.04	0.06	0.16	0.13	0.14	0.06	0	0	0	0.44	0.24	0.14	0.09	0.22	0.17	0	0.06	0.17	0.12	0.07	0.16	0.14	0	0.11	0.1	0	0.13	0.08	0.26	0.21	0	0.14	0.19	0	0.33	0.07	0.4	0.05	0.29
XLOC_004136	0.04	0.2	0.76	0.26	0.11	0.22	0.07	0.16	0.38	0.3	0.11	0.25	0.2	0.55	0.26	0.23	0.18	0.17	0.07	0.28	0	0.31	0	0	0.02	0.2	0.29	0.09	0.23	0.06	0.04	0	0.03	0.16	0.07	0.14	0	0.08	0.17	0.12	0.02	0.02	0.43	0.09	0.06	0.26	0.02	0.15	0.08
XLOC_004137	0.16	0	0.23	0	0.13	0.31	0.06	0.03	0.9	0.32	0.1	0.03	0.14	0.35	0.25	0.32	0.02	0	0.13	0.03	0.15	0.04	0	0.03	0.16	0.09	0.44	0.15	0.28	0.1	0.19	0.08	0.73	0.26	0.79	0.51	0.67	1.01	0.64	0.51	0	0.09	0.2	0.2	0.15	0.12	0.04	0.48	0.15
XLOC_004144	0.31	0.21	0.11	0	0.46	0.07	0.07	0	0.18	0.12	0.08	0	0.17	0.09	0.04	0.05	0.06	0	0.08	0.15	0.28	0.09	0.06	0.13	0.31	0.17	0	0.04	0	0.19	0.08	0	0.06	0	0.07	0.31	0.2	0.89	0.09	0	0	0.09	0.26	0.28	0	0	0	0	0.09
XLOC_004146	0.04	0.18	0.16	0.24	0.09	0.08	0.04	0.12	0.36	0.5	0.41	0.37	0.19	0	0.22	0.18	0	0.07	0.4	0.04	0.04	0.16	0.1	0.19	0.49	0.14	0.22	0.25	0	0.05	0.61	0.05	0.98	0.13	1.26	0.98	0.75	0.63	0.1	0.29	0.41	0.19	0.46	0.37	0.31	0.16	0.53	0.15	0.1
XLOC_004150	0.39	0.38	0.49	0.43	0.06	0.49	0.58	0.37	0.21	0.02	0.08	0.05	0.11	0.19	0.1	0.22	0.02	0.16	0	0.06	0.03	0.18	0.02	0.1	0.03	0.08	0.05	0.2	0.04	0.18	0	0	0	0.04	0.22	0.23	0	0	0.38	0	0.25	0	0.03	0.15	0.05	0.05	0.12	0	0.07
XLOC_004157	0.13	0.09	0.14	0.05	0	0	0.12	0	0.07	0	0	0	0	0	0	0.04	0	0	0	0	0	0	0.05	0	0	0.17	0.36	0.07	0	0.11	0	0	0	0.14	0	0.06	0	0	0	0	0	0.03	0	0	0	0	0.09	0	0
XLOC_004158	0.02	0.1	0.11	0	0.05	0.18	0.1	0.21	0.09	0	0.43	0.16	0.11	0.25	0.02	0.11	0.28	0.07	0.47	0.22	0.24	1.26	0.25	0.67	0.07	0.15	0.33	0.52	0.24	0.69	0.06	0.41	0.32	0.34	0.07	0.44	0.03	0.46	0.02	0.25	0.2	0.06	0.27	0.27	0.08	0.1	0.03	0.31	0.1
XLOC_004162	0.05	0	0	0	0	0	0	0	0	0.03	0	0	0.05	0	0	0	0.07	0.08	0.15	0.24	0.18	0	0.08	0.38	0.08	0.19	0	0.08	0.03	0.03	0.39	0.03	0	0.29	0	0	0	0.05	0	0	0.08	0.27	0.03	0.27	0	0	0.07	0.13	0.17
XLOC_004163	0.06	0.04	0.22	0.18	0	0.02	0	0.05	0.5	0.01	0.41	0.22	0.08	0.14	0.3	0.25	0.22	0.39	0	0.08	0	0.07	0.43	0.12	0.84	0.31	0.19	0.34	0	0.12	0.27	0.03	0.16	0.36	0.48	0.69	0	0.76	0.36	0.58	0.17	0.17	0.21	0.04	0.03	0	0.04	0.25	0.22
XLOC_004165	0.06	0.11	0.09	0	0	0.04	0.04	0.09	0.25	0.2	0.39	0.16	0.13	0.32	0.19	0.16	0.24	0.14	0.41	0.55	0.44	0.55	0.89	0.59	0.25	0.36	0.63	0.15	0.97	0.33	0.56	0.62	0.76	0.63	0.89	0.38	0.06	0.33	0.22	0.15	0.76	0.37	0.94	0.93	1.18	1.03	1.1	0.9	0.13
XLOC_004168	0.06	0.08	0.04	0.19	0.29	0.41	0.28	0.53	0.25	0.09	0.41	0.16	0	0.17	0.13	0.14	0	0	0	0	0.05	0	0.1	0	0.1	0.03	0.07	0.06	0	0.07	0.8	0.15	0.17	0	0.11	0	0.41	0.12	0	0.34	0.03	0	0	0.27	0	0.04	0.08	0	0
XLOC_004175	0.14	0.09	0	0.08	0	0.03	0	0.22	0.12	0.13	0.18	0.04	0.23	0.08	0.14	0.08	0.12	0.22	0	0.2	0.09	0.08	0.14	0.24	0.21	0.21	0.16	0.22	0.02	0.02	0.07	0.04	0.2	0	0.26	0.2	0.39	0	0.12	0.04	0.06	0.27	0.12	0	0.17	0	0.19	0.07	0.2
XLOC_004176	0.08	0	0.14	0.06	0.12	0	0.11	0	0.05	0.04	0.1	0	0.04	0.09	0	0.07	0.09	0.19	0	0	0	0.05	0	0.31	0.05	0.04	0.02	0.27	0	0	0.04	0.47	0	0.12	0	0	0	0	0.05	0.23	0.07	0.44	0.14	0.04	0.14	0.15	0.11	0.41	0.41
XLOC_004187	0.12	0.11	0.07	0.06	0.16	0.07	0.05	0.08	0.01	0.03	0.04	0.01	0.01	0.01	0.04	0.01	0.44	0.29	0.16	0.21	0.1	0.22	0.2	0.11	0.09	0.17	0.07	0.19	0.03	0.08	0.1	0.06	0.26	0.19	0.1	0	0	0	0	0	0.73	0.53	0.4	0.18	0.15	0.16	0.03	0.17	0.09
XLOC_004192	0	0	0	0	0	0	0	0	0	0.21	0.03	0	0.21	0	0.18	0.08	0.09	0	0.07	0	0.18	0	0.52	0.06	0	0	0.15	0	0.2	0.12	0	0.04	0.05	0.05	0.31	0	0	0.2	0	0.15	0	0.29	0.04	0	0	0	0.49	0	0
XLOC_004193	0	0	0	0	0	0	0	0	0.04	0.24	0	0	0.04	0	0.04	0.04	0	0	0	0.13	0	0	0	0	0	0	0	0	0.08	0	0	0	0	0.1	0.12	0	0.06	0	0	0.07	0	0	0.07	0.33	0	0.2	0	0	0.15
XLOC_004194	0	0	0	0	0.05	0.09	0	0	0.12	0.08	0.13	0.03	0.11	0.17	0.06	0.14	0.11	0.04	0	0.05	0	0.18	0.12	0.13	0.03	0	0.11	0	0.12	0	0	0	0	0.74	0	0	0	0.05	0	0.22	0	0	0.08	0.03	0.03	0	0	0	0
XLOC_004195	0	0	0	0	0	0	0	0.07	0.04	0.04	0.02	0	0.02	0.02	0.1	0.02	0.27	0.23	0.08	0.07	0.07	0.41	0.12	0.13	0.32	0	0.08	0	0	0.54	0	0	0.05	0	0	0.11	0	0.08	0	0.08	0	0	0	0	0	0	0.05	0	0.17
XLOC_004196	0	0	0.03	0	0	0	0	0	0.08	0.06	0.2	0.02	0	0.04	0.1	0.02	0.22	0.27	0.18	0	0.16	0.3	0.19	0.06	0.02	0.19	0.12	0.09	0.28	0.08	0	0	0.2	0.18	0.2	0	0.21	0.07	0	0	0.17	0.02	0	0	0.1	0	0.02	0	0.24
XLOC_004200	0.84	1.02	0.65	1.01	0.4	0.24	0.67	0.97	1.42	1.79	1.25	1.93	0.8	0.28	1.72	1.47	1.24	0.96	1.26	1.7	0.82	0.24	1.8	2.24	1.25	1.68	1.23	1.74	0.95	0.34	1.58	1.55	1.14	1.31	1.05	1.51	0.77	0.2	1.42	1.57	0.99	1.24	0.93	1.44	0.68	0.23	1.47	1.3	0.96
XLOC_004202	0.22	0.85	1.39	0.37	1.73	1.49	0.87	0.08	0.18	0.38	0.18	0.18	0.56	0.61	0.24	0.25	0.25	0.07	0.17	0.17	0.12	0.52	0.24	0.26	0.31	0.07	0.12	0.38	0.11	0.98	0.07	0.16	0.06	0.48	0.24	0.29	0.85	1.02	0.45	0.44	0.07	0.66	0.89	0.54	0.54	1.24	0.32	0.61	0.1
XLOC_004205	0	0.09	0.1	0.21	0.13	0.18	0	0	0.14	0.25	0.58	0.27	0.16	0.38	0.54	0.18	0.17	0.05	0.24	0.56	0.12	0.04	0.13	0	0.08	0.04	0.29	0.23	0.04	0	0.33	0.08	0.15	0.2	0.57	0.73	0.5	0.6	0.9	0.11	0	0.33	0.28	0.56	0.28	0.04	0.37	0.09	0
XLOC_004207	0.81	0.16	0.54	0.59	0.45	0.85	0.59	0.72	0.17	0.06	0.12	0.24	0.28	0.1	0.13	0.1	0.7	0.76	0.12	0.17	0.26	0.35	0.14	0.25	0.32	0.38	0.33	0.51	0.18	0.55	0.43	0.18	0.59	0.39	0.16	0.62	0.15	0.36	0.07	0.07	0.96	0.98	0.1	0.76	0.24	0.59	0.35	0.86	0.26
XLOC_004210	0.18	0.21	0.13	0.11	0.48	0.35	0	0.32	0.05	0.05	0.16	0	0.07	0.43	0	0.03	0.1	0.07	0.09	0.09	0	0.11	0.04	0	0.05	0.2	0	0	0.36	0.19	0.14	0	0.23	0.13	0.25	0	0	0	0.1	0	0.15	0.1	0.05	0.09	0.21	0.11	0.18	0	0.1
XLOC_004214	0.04	0.35	0.34	0.58	0.17	0.37	0.08	0.27	0.66	0.18	0.36	0.16	0.42	0.32	0.31	0.12	0.31	0.07	0.17	0.21	0.19	0	0	0.26	0.56	0.78	0.15	0.16	0.03	0.33	0.83	0.4	0.65	0.61	0.16	0.25	0	0.04	0.1	0.29	0.12	0.52	0.36	0.2	0.08	0.16	0	0.15	0.24
XLOC_004216	0.28	0.12	0.1	0.14	0.17	0.15	0.16	0.4	0.18	0.09	0	0.09	0.23	0.2	0.06	0.24	0.05	0.21	0.21	0.1	0.13	0	0.19	0.09	0	0	0.04	0	0.22	0.1	0.3	0.06	0.15	0	0.03	0.14	0.33	0.14	0.24	0	0.1	0.11	0.12	0.16	0.21	0.13	0.5	0.09	0.39
XLOC_004217	0.03	0.02	0.02	0	0	0.02	0.05	0.04	0.09	0.04	0.16	0.09	0.16	0	0.38	0.13	0.07	0	0.08	0.07	0.05	0.03	0.02	0.09	0.07	0	0.18	0.09	0.17	0.09	0.04	0.19	0.22	0.32	0.54	0.84	0.28	0.34	0.23	0.57	0	0.06	0.09	0.19	0.06	0.15	0	0	0
XLOC_004218	0.24	1.1	1.02	1.19	0.43	0.24	0.58	0.35	0.07	0.66	0.27	0.44	0.36	0	0.17	0.21	0.11	0.03	0.24	0.04	0.07	0.14	0.09	0.07	0	0.07	0	0.33	0.02	0.17	0.04	0	0.17	0.12	0.15	0.31	0.24	0.65	0.18	0.31	0.02	0.11	0	0.48	0.09	0.02	0.03	0.16	0
XLOC_004219	0	0	0	0	0	0	0	0	0.02	0.04	0	0	0	0	0	0	0.21	0.48	0.02	0.04	0.02	0	0	0.03	0.27	0.16	0.06	0.04	0	0.01	0	0	0.06	0.05	0.04	0	0	0	0	0	0.13	0.01	0	0	0	0	0	0	0.12
XLOC_004223	9.72	12.62	5.61	10.6	7.49	8.46	6.89	6.85	0.01	0.04	0.11	0	0.06	0.04	0.07	0.06	0.13	0.19	0.02	0.18	0.18	0.26	0.29	0.31	0.04	0.03	0.16	0.09	0.44	0.39	0.52	0.22	0.02	0.04	0.11	0	0.14	0.17	0.02	0	0.25	0.19	0.47	0.76	0.94	0.61	0.96	1.01	0.07
XLOC_004225	1.28	1.82	0.71	3.28	2.09	2.82	3.42	3.61	0.12	0.11	0.07	0.39	0.21	0.28	0	0.41	0.28	0.16	0.29	0.52	0.39	0.22	0.28	0.27	0.18	0.1	0.66	0.59	0.18	0.23	0.08	0.37	0.23	0.29	0	0.07	0.24	0.4	0	0	0.68	0.56	0.16	0.54	0.4	0.51	0.58	0.53	0.2
XLOC_004227	0.16	0.16	0.03	0.05	0.23	0.02	0.04	0.05	0.02	0.01	0.08	0.08	0.05	0	0.03	0.09	0.06	0.23	0.24	0.19	0.11	0.17	0.19	0.1	0.01	0.02	0	0.14	0	0.08	0	0.04	0.01	0.03	0.3	0.04	0.05	0.04	0.02	0.04	0	0.02	0.27	0.09	0.01	0.02	0.04	0.08	0.11
XLOC_004230	0.09	0.06	0.1	0.36	0.23	0	0.97	0.29	0.05	0.1	0.05	0.1	0.02	0.44	0.26	0.05	0.07	0.07	0.56	0.13	0.04	0	0	0.2	0.08	0.08	0.03	0	0	0.08	0	0.11	0	0.14	0	0.09	0.12	0.14	0.16	0	0	0.15	0	0	0.05	0	0	0.06	0
XLOC_004231	0.09	0.22	0.1	0.2	0.05	0.16	0.13	0.35	0.11	0.06	0.06	0.07	0.05	0.08	0.13	0.39	0.07	0.13	0	0.05	0.28	0.03	0.09	0.3	0	0.04	0.16	0.05	0.12	0.08	0	0.19	0.17	0.1	0.09	0.21	0.16	0.34	0.03	0.29	0.1	0.01	0.08	0.08	0.03	0	0.03	0.08	0.03
XLOC_004236	0.05	0.04	0.16	0.39	0	0	0.1	0.29	0.29	0.13	0.13	0.19	0	0.08	0.08	0.47	0.1	0.02	0.06	0	0.02	0.03	0.26	0.02	0.18	0.24	0.15	0	0	0	0	0	0.2	0.22	0.03	0.03	0.05	0	0	0.06	0.06	0	0.17	0.03	0	0.2	0.2	0.17	0.09
XLOC_004240	0.4	0.49	1.08	0.32	0.49	0.62	0.44	1.03	0	0.03	0.05	0	0	0	0.09	0.06	0.06	0.02	0	0.08	0.05	0.02	0.02	0.09	0.06	0.07	0.08	0	0	0.08	0	0.07	0.06	0.09	0	0.16	0	0.02	0	0	0.11	0	0	0.04	0.08	0.02	0	0.01	0
XLOC_004242	0.17	0.18	0.58	0.47	0.43	0.35	0.4	0.61	0.22	0.04	0.08	0.04	0.03	0.07	0.07	0.01	0.02	0.03	0.05	0.08	0.02	0.04	0.04	0.06	0	0	0.09	0.04	0	0.12	0.05	0.17	0.12	0	0	0	0.04	0.1	0.04	0.1	0.09	0.06	0	0.01	0.01	0.03	0.07	0.11	0.06
XLOC_004243	0	0	0.06	0	0	0.1	0	0.18	0.16	0	0	0.02	0	0.09	0.02	0	0.09	0	0.04	0.23	0	0	0.16	0	0.38	0	0.02	0.06	0	0.05	0.06	0	0.03	0.06	0.04	0.04	0	0	0.28	0.04	0.24	0	0	0	0.02	0	0	0	0.13
XLOC_004245	0.05	0	0	0	0	0.05	0	0	0	0	0	0	0.03	0.06	0.3	0	0	0.08	0	0	0	0	0	0.14	0	0	0	0	0	0	0.06	0	0	0	0	0	0	0	0	0	0	0	0	0	0	0.07	0.04	0	0.06
XLOC_004248	0.07	0.08	0.07	0.03	0.12	0.24	0.13	0.13	0.12	0.17	0.35	0.15	0.25	0.3	0.39	0.34	0.01	0	0.04	0	0.11	0.23	0.16	0.08	0.02	0.05	0.08	0.08	0.11	0.21	0.26	0.19	0.25	0.29	0.55	0.49	0.66	0.79	0.84	0.81	0.02	0.05	0.11	0.15	0.24	0.18	0.31	0.33	0.07
XLOC_004250	0	0.18	0.03	0.06	0.09	0.04	0	0.06	0.01	0.04	0.01	0	0.17	0.08	0.03	0.08	0.07	0.04	0	0	0.11	0.09	0.02	0	0.05	0.18	0.05	0.25	0.03	0.28	0	0.07	0.03	0.12	0.07	0.05	0	0.02	0.03	0.03	0	0.01	0	0.06	0.03	0.04	0	0.02	0.05
XLOC_004252	0	0.03	0	0	0.04	0.2	0.11	0.03	0.27	0.18	0.1	0.06	0.1	0.15	0.15	0.09	0	0	0.04	0	0.03	0.14	0	0.03	0.09	0	0	0.08	0.02	0	0.02	0.02	0.42	0.37	0.43	0.45	0.66	0.32	0.22	0.44	0	0	0	0	0	0.07	0.16	0.1	0
XLOC_004255	0	0	0.03	0.03	0	0	0	0	0	0.02	0	0	0.02	0.2	0	0.03	0	0	0	0.04	0	0.05	0.1	0	0	0	0	0	0	0.03	0	0.05	0	0.06	0	0.04	0.11	0	0	0	0	0	0	0	0.21	0	0	0	0
XLOC_004257	0.94	0.61	0.15	0.69	0.85	0.99	0.61	0.95	0.26	0.07	0.09	0.33	0.19	0.27	0.02	0.16	0	0.19	0.07	0	0.06	0.17	0	0.42	0.18	0	0	0.05	0	0.31	0.13	0.3	0	0	0	0	0.15	0.11	0.32	0.08	0.34	0.19	0.14	0	0	0.13	0.24	0	0.08
XLOC_004270	0.04	0.03	0.31	0.18	0	0.13	0.29	0.07	0.25	0.12	0.18	0.14	0.04	0	0.13	0.09	0.22	0.27	0.27	0.19	0.32	0.33	0.43	0.3	0.5	0.09	0.11	0.5	0.29	0.62	0.25	0.24	0.2	0.11	0.25	0.38	0.17	0.16	0.13	0.17	0.15	0.04	0.35	0.12	0.07	0.05	0.18	0.13	0.39
XLOC_004275	0	0	0	0	0	0	0	0	0.21	0	0.06	0	0.1	0	0	0.03	0.09	0.05	0	0.18	0	0.07	0.1	0	0	0	0	0	0.08	0	0	0	0	0	0	0	0	0	0.07	0	0	0	0.54	0	0	0	0	0.08	0
XLOC_004276	0	0	0	0	0	0	0	0	0	0	0	0	0	0	0	0	0	0	0	0	0	0	0	0	0	0.65	0	0	0	0	0	0	0.05	0.05	0	0	0.13	0	0	0	0	0	0	0	0	0	0	0	0
XLOC_004278	0.05	0.25	0.19	0.19	0.16	0.37	0.47	0.14	0	0.11	0.21	0.03	0.03	0.14	0.12	0.12	0.04	0.02	0.16	0	0.1	0.23	0.02	0.23	0.03	0.16	0.45	0.1	0.1	0	0.01	0	0.04	0.04	0.15	0.11	0.09	0.19	0.03	0	0	0.06	0.32	0.2	0.02	0.15	0	0.11	0.06
XLOC_004280	0.61	0.61	0.61	0.83	0.28	0.85	1.03	0.95	0.68	0.3	0.43	0.39	0.35	0.4	0.33	0.3	0.29	0.44	0.57	0.75	0.35	0.57	0.48	0.47	0.4	0.32	0.47	0.58	0.38	0.22	0.24	0.26	0.14	0.12	0.54	0.52	0.26	0.44	0.36	0.57	0.22	0.13	0.32	0.12	0.19	0.17	0.44	0.32	0.41
XLOC_004303	0	0	0	0	0	0.08	0	0.04	0.03	0.09	0.39	0.14	0.19	0	0.1	0.38	0	0.07	0	0.09	0	0	0.04	0.08	0	0.12	0.22	0	0.03	0.16	0.07	0	0.19	0.2	0.21	0.09	0.27	0	0.05	0.25	0	0	0.27	0.04	0	0	0	0.06	0.05
XLOC_004304	0	0	0	0	0	0	0.07	0	0	0	0	0	0	0	0	0	0	0.06	0	0	0	0	0	0	0.14	0	0	0.08	0	0	0	0.44	0.35	0	0	0	0	0.83	0	0	0.04	0	0	0	0	0	0	0	0
XLOC_004305	0	0.22	0.04	0.04	0.15	0.04	0.09	0	0.12	0.41	0.23	0.09	0.11	0.13	0.03	0.06	0.09	0.52	0.2	0.29	0.14	0.12	0.26	0.17	0.43	0.26	0.1	0.16	0.09	0.25	0.25	0.31	0.13	0.57	0.05	0.05	0.13	0.1	0.09	0	0.11	0.25	0.11	0.04	0	0.31	0.2	0.19	0.51
XLOC_004308	0.43	0.21	0.39	0.39	0.48	0.72	0.66	0.33	0.13	0	0	0.12	0.09	0.1	0.11	0.2	0.04	0.16	0.26	0.08	0.23	0.1	0.14	0.17	0.06	0	0.06	0.19	0.04	0.17	0.14	0.21	0.1	0.15	0.05	0.11	0	0.06	0	0.1	0.33	0.17	0.52	0.03	0.09	0.21	0.33	0.27	0.32
XLOC_004314	0.05	0	0	0.17	0.1	0.18	0	0	0.03	0	0.06	0.22	0.03	0	0.09	0.15	0	0.04	0.11	0.1	0.1	0.06	0.13	0.14	0	0.09	0.12	0.22	0	0	0.14	0.03	0	0	0.1	0.26	0	0.11	0.12	0.12	0	0	0	0.08	0.03	0	0.04	0	0.06
XLOC_004323	0	0	0	0	0	0	0.02	0	0.06	0.14	0.01	0	0.06	0	0.03	0.03	0	0	0	0	0	0	0	0	0	0	0	0	0	0	0	0	0.21	0.18	0.3	0.81	0.21	0.72	0.49	0.27	0	0	0	0	0	0	0	0	0
XLOC_004324	0	0	0.23	0.06	0.62	0.07	0	0	0	0	0	0	0	0	0	0.09	0	0	0	0	0	0	0	0	0	0	0	0	0	0	0	0	0.06	0	0	0	0	0	0.09	0.09	0	0	0.62	0	0.19	0	0	0.32	0.09
XLOC_004326	0	0.1	0.22	0.12	0.15	0	0.14	0.18	0.06	0.61	0.26	0.13	0.03	0	0.06	0.29	0.07	0.04	0.15	0.1	0.28	0.06	0.12	0.17	0	0	0.2	0.24	0	0	0.05	0.25	0.04	0.53	0.29	0.45	0.17	0.05	0.18	0.06	0.08	0.39	0.09	0.05	0	0	0	0.21	0.29
XLOC_004332	0.12	0.02	0.11	0.12	0.05	0.08	0.12	0.17	0.68	0.77	1.98	0.88	1.13	1.48	1.22	1.37	0.37	0.29	1.41	1.38	1.53	1.48	2.77	2.04	0.39	0.42	0.99	1.54	1.51	1.39	1.99	1.38	0.76	0.63	0.95	0.73	0.77	1.13	1.39	0.85	1.26	0.49	1.74	1.53	1.35	1.01	2.2	1.66	0.27
XLOC_004335	0	0	0	0	0	0	0	0	0	0.36	0	0	0	0	0	0	0	0	0	0	0	0	0	0.12	0	0	0	0	0	0	0	0	0	0	0	0	0	0	0	0	0	0	0	0	0	0	0	0	0
XLOC_004336	0.52	0.47	0.34	1.05	0.7	0.75	0.81	0.78	0.78	1.09	1.12	1.81	1.03	1.02	0.77	1.01	0.61	0.71	0.57	1.3	0.21	0.69	0.26	0.53	0.51	0.48	0.43	0.84	0.75	0.28	0.55	0.48	0.47	0.36	0.69	1.87	1.13	1.14	0.58	0.98	0.44	0.7	0.36	1.05	0.57	0.79	0.51	0.37	0.77
XLOC_004337	0.14	0.05	0	0.11	0.07	0	0	0	0.04	0	0	0	0	0	0.08	0.04	0.05	0	0.29	0	0	0.09	0	0	0.24	0	0.04	0	0	0	0	0.04	0.05	0	0	0	0.24	0	0.08	0	0.04	0	0.12	0	0	0	0	0	0
XLOC_004339	0	0	0	0	0	0	0	0	0	0	0.04	0.04	0.08	0	0	0	0.21	0.64	0.15	0.29	2.1	0.64	0.12	0.38	0.71	0.25	0.25	0.62	0.51	0.63	1.08	0	0.27	0	0	0	0	0.08	0	0	0.91	0	0	0.11	0.09	0	0	0	1.1
XLOC_004340	0	0	0	0	0	0	0	0	0	0.16	0	0.07	0.07	0.04	0	0	0.35	0.05	0.19	0.48	0.39	0.53	0	0.21	0.38	0.1	0.38	0.42	0	0.04	0	0	0.36	0.05	0.12	0	0	0	0	0	0.44	0	0.03	0.41	0	0.04	0	0	0.77
XLOC_004344	0.43	0.03	0.53	0.55	0.91	1.37	0.29	0.24	0.02	0.22	0.02	0.16	0.15	0.15	0.15	0.18	0.17	0	0.12	0.15	0.18	0.14	0.03	0	0.07	0	0.13	0.24	0.1	0.09	0.08	0	0.14	0.06	0.07	0.08	0.03	0.12	0	0.17	0.02	0.19	0.13	0.14	0.23	0.61	0.05	0.05	0
XLOC_004349	0	0	0.07	0	0.04	0.31	0.25	0.04	0.05	0.05	0.02	0	0.27	0.18	0.2	0.21	0.1	0.04	0.14	0.13	0.08	0.06	0.22	0.08	0.08	0.2	0.18	0	0.26	0.14	0.05	0.08	0.03	0.1	0.04	0.13	0.12	0	0.05	0.26	0.03	0.1	0.05	0.05	0.08	0.14	0	0.06	0.05
XLOC_004357	0.1	0.07	0.11	0.08	0	0	0	0.04	0	0	0.08	0.11	0.11	0.03	0	0.15	0.07	0.31	0	0	0.14	0.25	0	0.09	0	0	0.03	0.03	0	0	0.11	0.12	0.22	0.15	0	0	0	0	0.12	0.17	0.03	0	0	0	0	0.06	0	0.14	0
XLOC_004359	0.22	0.19	0.36	0.32	0.38	0.81	0.49	0.49	0.31	0.74	1.33	0.61	0.4	0.6	0.9	0.77	0.3	0.19	0.41	0.32	0.38	0.47	0.41	0.34	0.38	0.36	0.75	0.14	0.48	0.59	0.78	0.83	0.9	1.13	3.57	2.45	1.62	2.61	1.95	2.34	0.38	0.24	0.55	0.73	0.61	0.83	0.92	0.91	0.4
XLOC_004364	0.39	0.67	0.94	0.36	0.06	0.57	0.24	0.46	0.12	0.24	0.1	0.31	0	0.15	0.25	0.27	0.19	0.3	0	0.32	0.12	0.16	0.05	0.34	0.15	0	0.04	0.14	0	0	0	0.16	0.09	0.24	0.61	0.96	0.34	0.14	0	0	0.04	0.39	0.07	0.83	0	0.24	0.85	0.09	0.07
XLOC_004365	0	0.05	0	0.06	0.05	0.01	0.02	0.02	0.04	0.04	0.19	0.07	0.17	0.12	0.06	0.13	0.31	0.17	0.33	0.08	0.25	0.23	0.13	0.23	0.24	0.17	0.2	0.19	0.09	0.06	0.22	0.02	0.18	0.37	0.13	0.06	0.04	0.13	0.19	0.07	0.22	0.17	0.08	0	0.08	0.13	0.05	0.07	0.14
XLOC_004371	0	0.05	0	0	0	0	0	0	0.16	0	0	0	0.21	0	0	0.05	0	0	0	0	0	0	0.06	0.13	0	0	0	0	0.29	0	0	0	0.06	0	0	0	0	0	0	0	0	0	0	0	0	0	0	0	0
XLOC_004381	0.16	0.05	0.1	0.06	0.05	0.15	0.04	0.11	0.23	0.27	1.4	0.11	0.06	0.08	0.15	0.11	5.36	5.12	4.08	4.21	3.52	3.02	3.53	4.48	4.21	4.12	2.13	3.59	2.11	1.94	1.88	1.6	2.39	2.19	1.02	0.77	0.32	1.11	0.38	0.58	1.53	1.33	0.8	0.8	0.64	0.43	0.54	0.73	3.28
XLOC_004384	0.14	0.13	0.19	0.11	0.33	0.23	0.13	0.29	0	0.04	0.04	0.08	0.15	0.04	0.04	0.01	0.08	0.07	0.05	0.12	0.04	0.03	0.15	0.08	0.08	0	0.01	0.07	0.21	0.2	0.06	0.09	0.02	0	0	0	0.12	0.1	0.27	0	0.37	0.09	0.19	0.23	0.2	0.04	0.52	0.08	0.16
XLOC_004385	7.46	9.66	8.19	10.02	8.35	10.81	8.87	10.42	0.02	0.03	0.01	0	0.01	0.01	0	0.01	0	0	0	0	0	0.01	0.01	0.01	0	0	0	0	0	0	0.01	0	0	0.02	0	0.01	0	0	0.01	0.02	0	0	0	0	0	0	0	0	0.01
XLOC_004386	0.75	0.27	0.57	0.7	0.17	0.46	0.61	0.97	0.23	0.35	0.14	0.19	0.48	0.17	0.1	0	0.09	0.07	0	0.21	0.08	0	0.1	0	0.1	0.34	0.25	0.16	0.19	0.18	0.28	0.38	0.16	0.07	0.21	0.17	0	0.73	0.1	0	0.15	0.29	0.57	0.09	0.05	0	0.21	0	0
XLOC_004387	2.52	1.81	3.52	4.45	2.48	2.86	2.77	3.41	0.9	0.55	0.95	0.65	0.83	1.01	0.77	0.66	0.42	0.76	0.65	0.58	0.67	0.42	1.02	0.51	0.89	0.43	0.69	0.75	0.83	0.92	0.16	1.58	0.54	1.17	1.06	1.64	0.85	1.23	1.49	0.5	1.5	0.95	1.08	1.77	0.41	0.57	0.87	1.41	1.06
XLOC_004388	0.08	0	0.09	0.06	0	0.21	0.15	0.28	0.14	0.13	0	0	0.09	0	0.09	0	0.06	0.12	0.37	0.2	0.18	0.05	0.13	0.31	0	0.02	0.09	0	0	0.17	0	0	0.06	0.48	0.38	0.08	0	0	0.09	0	0.04	0.22	0.07	0.22	0.05	0.12	0.38	0.05	0.27
XLOC_004392	2.86	3.56	3.15	3.62	4.15	6.25	4.95	4.28	4.1	5.78	7.52	4.87	3.23	3.83	3.8	3.76	4.4	3.25	11.25	10.46	13.3	16.7	15.18	14.7	7.18	7.45	17	12.18	23.66	19.89	38.08	31.85	7.33	8.12	11.89	7.8	5.99	7.55	6.96	7.37	16.97	19.36	37.85	38.9	41.3	35.27	31.43	45.16	6.29
XLOC_004393	0.3	0.07	0.04	0	0.34	0	0	0.09	0.38	0.34	0.05	0.6	0	0.08	0	0.2	0.07	0.15	0	0.05	0.04	0	0	0.08	0.33	0	0	0	0	0	0.11	0	0.07	0	0.05	0	0	0.15	0	0.22	0.38	0.22	0.11	0.05	0	0.06	0	0.33	0.11
XLOC_004394	0	0	0	0.07	0	0	0	0	0	0	0	0	0	0	0.02	0	0	0	0	0	0.04	0	0	0	0	0	0	0	0	0	0	0	0.35	0	0	0	0	0	0	0	0	0	0	0	0	0	0	0	0
XLOC_004399	0.07	0	0.05	0	0.12	0.02	0.02	0.06	0.01	0.06	0.06	0.05	0.03	0.06	0.05	0.01	0.07	0.05	0.12	0.12	0.19	0.08	0.11	0.16	0.08	0	0.14	0.17	0	0.01	0.02	0.05	0.04	0.22	0.07	0.07	0.15	0	0.12	0.16	0.07	0.05	0.05	0.12	0	0.01	0.07	0.15	0.04
XLOC_004405	0	0.03	0.06	0	0	0	0	0	0.58	0.43	1.42	0.27	0.05	0.2	0.29	0.13	0.37	0.77	1.14	0.38	0.74	0.42	1.07	1	0.58	0.45	0.66	0.16	0.67	0.57	0.35	1.38	0.09	0.48	1.5	0.72	0.34	1.3	0.8	0.98	0.91	0.76	0.78	0.59	0.87	0.55	0.62	0.76	0.24
XLOC_004411	0.04	0	0	0	0	0	0	0	0.12	0.19	0.06	0.02	0.29	0.09	0	0.12	0.03	0.19	0.08	0.32	0	0	0	0.14	0.21	0.07	0	0.28	0.03	0.07	0.13	0.02	0.03	0.06	0.08	0.08	0.04	0.13	0.09	0.14	0.02	0.25	0	0.06	0.19	0.02	0	0.06	0.09
XLOC_004412	0	0	0.04	0.05	0	0	0	0	0.33	0.21	0.21	0.33	0.06	0.13	0.35	0.2	0.04	0.18	0	0	0.21	0.35	0	0	0.29	0.25	0.03	0	0	0.07	0	0	0.04	0.25	0	0	0.25	0.06	0.13	0	0.19	0.13	0	0.12	0	0.27	0.27	0.08	0.19
XLOC_004414	0.53	0.5	0.23	0.36	0.57	0.05	0.78	0.44	0.71	0.54	0.34	0.31	0.5	0.19	0.5	0.38	0.32	0.02	0.21	0.05	0.17	0.06	0.29	0.25	0.07	0.38	0.31	0.1	0.16	0.02	0	0.26	0.17	0.31	0.22	0.28	0.23	0.05	0.37	0.09	0.12	0.29	0.06	0.25	0.13	0.02	0.52	0.22	0.06
XLOC_004418	0.35	0	0	0	0	0	0	0	0.06	0.03	0.3	0.22	0.4	0.22	0.34	0.17	0	0.05	0.23	0.28	0.06	0	0.05	0.14	0.14	0	0.16	0	0.04	0.08	0.17	0.1	0.46	0.14	0.12	0.12	0.03	0.07	0	0.14	0.11	0.44	0.39	0.81	0.28	0.27	0.41	0.52	0.07
XLOC_004429	0.2	0.24	0.38	0.32	0.15	0.26	0.3	0.49	0	0.07	0.01	0.03	0.11	0.17	0	0.06	0.02	0.02	0.1	0.05	0	0.06	0.08	0.09	0.07	0	0	0	0.17	0	0	0	0.11	0	0	0.27	0.02	0	0	0.09	0.01	0.08	0	0.17	0.05	0	0.03	0.03	0.2
XLOC_004434	0.72	0.49	0.53	0.51	0.28	0.25	0.36	0.53	0.14	0.07	0.08	0.07	0.16	0.08	0.03	0.04	0.21	0.26	0.21	0.43	0.06	0.12	0.05	0.06	0.56	0.17	0.02	0.2	0.23	0.14	0.05	0.12	0.23	0.27	0.13	0.11	0.12	0.03	0.14	0.1	0.46	0.49	0.25	0.3	0.25	0.17	0.05	0.25	0.29
XLOC_004437	0.02	0	0.11	0.05	0.13	0.06	0.03	0.07	0.21	0.13	0.18	0.07	0.29	0.14	0.21	0.11	0.36	0.18	0.37	0	0.15	0.16	0.25	0.14	0.24	0.05	0.42	0.16	0.05	0.11	0.18	0.19	0.23	0.12	0.11	0.28	0.26	0.1	0.18	0.09	0.13	0.27	0.12	0.07	0.28	0.15	0.19	0.2	0.13
XLOC_004442	0	0	0	0	0	0	0.14	0	0.25	0.02	0.28	0.02	0	0.04	0.06	0.02	0.08	0.03	0.12	0.11	0	0	0.03	0	0.13	0.11	0.09	0.12	0.02	0.02	0	0.31	0.17	0.09	1.54	0.27	1.55	0.04	0.45	1.06	0.13	0	0.07	0.02	0.09	0	0.05	0	0.26
XLOC_004445	0.24	0.6	0.02	0.13	0.48	0.14	0.11	0.09	0.03	0.09	0.08	0.01	0.05	0.05	0.07	0.07	0.02	0.02	0.1	0.05	0.03	0.07	0.02	0.04	0.03	0.05	0.01	0.01	0.15	0.07	0.06	0.06	0.06	0.02	0.06	0.07	0.18	0.18	0.09	0.12	0.02	0	0	0.04	0.04	0.08	0.04	0.06	0.03
XLOC_004447	0	0	0	0	0	0	0	0	0.13	0.11	0.45	0.04	0	0.04	0.01	0.04	0.46	0.17	0	0.05	0.09	0	0.02	0.04	0.08	0.04	0.05	0.04	0	0	0	0	0.37	0.21	0.16	0.97	0	0.72	0.08	0.11	0	0.05	0	0	0	0.03	0.07	0	0.14
XLOC_004448	0	0	0	0	0	0	0	0	0.03	0.21	0.31	0	0	0	0	0.02	0.3	0.07	0	0	0.05	0.03	0.02	0.05	0.3	0.12	0.03	0.01	0	0	0.02	0	0.33	0.13	0.19	0.69	0	1.2	0.07	0.06	0	0	0	0	0.03	0.05	0	0	0.06
XLOC_004450	0.12	0.08	0.08	0.36	0	0.17	0.78	0.24	0	0	0	0	0	0	0	0	0	0	0	0	0.07	0	0	0.03	0	0	0	0	0	0	0	0	0	0	0	0.11	0.03	0	0	0	0	0	0	0	0	0	0	0	0
XLOC_004451	0.04	0	0.06	0.3	0.08	0.04	0.16	0	0	0	0.29	0.02	0.05	0.12	0	0.07	0	0.16	0.09	0.04	0.08	0.1	0.47	0.04	0.21	0.07	0.05	0	0.5	0.2	0.02	0.05	0	0	0.08	0.04	0.15	0	0.15	0.14	0.07	0	0.02	0.02	0	0.05	0.03	0.11	0.05
XLOC_004452	0.22	0.33	0.25	0.56	0.23	0.45	0.26	0.36	0.3	0.23	0.52	0.43	0.07	0.07	0.29	0.12	0.12	0.12	0.1	0.41	0.08	0.06	0.2	0.25	0.1	0.01	0.26	0.29	0.09	0.12	0.31	0.05	0.17	0.11	0.49	0.3	0.17	0.45	0.25	0.32	0.08	0.04	0.24	0.43	0	0.04	0.27	0.09	0.06
XLOC_004455	0.48	0.68	0.44	0.74	0.33	0.64	0.58	0.47	0	0	0.08	0	0	0	0.02	0	0.53	0.33	0.12	0.29	0.45	0.32	0.24	0.15	0.2	0.24	0.23	0.23	0.19	0.39	0.48	0.11	0.05	0.12	0	0	0	0.13	0.06	0	0.53	0.59	0.08	0.11	0.36	0.31	0.54	0.04	0.38
XLOC_004456	9.14	9.16	19.7	29.88	18.94	27.23	27.33	19.25	1.7	0.66	5.07	0.92	0.13	0.27	0.81	0.38	26.37	31.72	19.21	22.07	12.68	15.62	17.9	13.68	30.66	20.81	12.25	16.2	11.97	14.18	18.58	15.2	21.02	15.25	6.14	2.91	0.62	2.64	3.54	0.85	30.83	22.04	14.6	17.54	14.81	16.59	20.31	16.84	29.45
XLOC_004463	0	0	0	0	0.07	0.07	0	0	0	0.1	0.1	0.16	0.08	0.13	0	0.04	0.11	0.2	0.19	0.22	0.27	0	0.21	0.13	0	0.02	0.21	0.26	0	0.16	0.41	0.02	0.22	0	0.21	0.15	0.1	0	0.04	0	0.13	0.04	0.15	0.4	0.25	0.05	0.23	0.33	0.04
XLOC_004464	0	0	0	0	0	0	0	0	0.06	0.02	0.05	0.03	0.01	0	0.02	0	0.15	0.86	0.17	0.15	0.03	0.09	0.15	0.1	0.45	0.07	0.18	0.15	0.07	0.18	0.14	0	0.08	0.15	0.06	0.13	0	0.23	0	0	0.21	0.05	0	0	0.04	0.07	0.08	0	0.19
XLOC_004465	0.4	0.72	0.45	0.66	0.26	0.32	0.52	0.76	0.23	0.05	0.22	0.28	0.2	0.45	0.18	0.31	0.31	0	0.2	0.19	0.27	0.08	0.13	0.09	0	0.11	0.17	0.29	0.06	0.06	0.25	0.06	0	0.12	0.4	0.13	0.09	0.34	0.23	0.41	0.07	0.15	0.46	0.47	0.41	0.14	0.29	0.31	0.07
XLOC_004466	0	0	0	0.02	0	0	0	0	0.13	0.55	0.17	0.16	0.07	0.01	0.08	0.11	0	0.02	0.05	0.02	0.07	0	0.07	0.03	0	0.03	0.01	0	0	0	0	0.02	0.27	0.32	1.1	0.41	0.75	0.82	0.3	0.43	0.08	0.01	0.03	0	0	0.04	0.05	0.06	0
XLOC_004469	0.27	0.42	0.15	0.57	0.23	0.29	0.5	0.27	0.04	0.29	0	0.04	0.15	0.04	0	0.3	0.02	0	0.07	0.23	0.06	0	0	0.06	0	0.07	0.04	0	0	0	0.02	0.21	0.05	0.08	0.1	0.37	0.06	0.07	0.2	0.23	0	0	0.17	0.28	0.06	0.08	0	0	0.12
XLOC_004472	0.59	1.44	0.48	0.64	0.14	1.27	1.01	0.78	0	0	0.08	0	0.16	0.12	0.24	0.04	0.16	0.11	0.3	0.21	0.47	0.09	0.12	0.13	0.16	0	0.58	0	0.5	0.48	0	0.27	0.32	0	0.07	0	0	0	0.26	0	0.81	0	0.21	0.52	1.39	0.04	0	0.05	0.25
XLOC_004473	1.36	1.23	1.41	1.31	1.01	1.56	1.16	1.19	0.03	0.02	0.04	0.04	0.16	0.12	0.07	0.04	0.09	0.03	0.03	0.04	0.07	0.09	0.09	0.08	0.02	0.04	0.06	0.05	0.07	0.03	0.07	0.05	0.21	0.17	0.06	0.03	0.03	0.01	0.09	0.07	0.11	0.07	0.13	0.14	0.11	0.17	0.05	0.2	0.08
XLOC_004475	0.09	0.08	0.74	0.27	0.21	0.62	0.77	0.47	0.18	0.03	0.11	0.18	0.02	0	0.03	0.04	0.11	0.05	0.44	0.03	0.14	0	0.05	0.13	0.02	0.38	0.12	0.28	0.12	0.26	0.03	0.1	0.18	0.05	0.2	0.12	0.19	0.26	0.07	0.07	0.02	0.1	0.28	0.25	0	0.17	0.13	0.04	0.14
XLOC_004476	0.34	0.37	0.06	0.59	0.26	0.61	0.26	0.57	0.17	0.12	0.08	0.07	0.07	0.07	0.08	0.07	0.03	0.12	0.2	0	0.04	0.02	0.03	0.09	0.01	0.02	0.23	0.02	0.19	0.02	0	0.12	0.15	0.12	0.17	0.16	0.16	0.17	0.09	0.18	0.02	0.01	0.06	0.25	0.06	0.12	0.14	0.05	0.09
XLOC_004477	0.79	1.35	0.93	0.87	0.72	1.59	0.97	1.27	1.32	0.35	1.32	0.37	1.31	0.28	0.34	0.31	0.25	1.46	1.43	0.37	1.45	0.33	0.35	0.32	1.63	0.26	2.06	0.26	2.7	0.46	0.2	0.44	0.92	0.41	2.1	0.46	1.74	0.32	0.4	0.27	0.2	0.12	0.33	0.35	0.25	0.55	0.27	0.2	1.05
XLOC_004487	0	0	0	0	0	0.03	0	0	0.15	0.27	0.26	0.26	0.25	0.29	0.26	0.32	0	0	0	0	0	0.04	0.01	0	0	0	0	0	0	0	0	0	0.02	0	0.06	0.39	0.2	0.23	0.25	0.25	0	0	0	0	0	0	0	0	0
XLOC_004492	0.56	0.93	0.62	1.32	0.63	1.83	1.89	0.79	0.34	0.73	0.71	0.34	0.26	0.66	2.32	0.55	0.63	0.22	0.57	0.79	0.86	1.01	2.02	0.73	0.59	0.8	1.18	1.08	1.4	1.88	1.95	0.63	0.57	1.3	0.66	0.79	0.69	2.15	1.99	1.02	0.39	0.62	0.9	0.83	0.56	1.25	2.27	0.78	0.89
XLOC_004493	0.02	0	0.07	0.05	0	0.08	0	0.08	0.07	0	0.11	0.04	0.19	0.1	0.27	0.11	0.04	0.06	0.2	0.07	0.17	0.07	0.38	0.02	0.12	0	0.12	0.08	0.2	0.19	0.13	0.07	0.07	0.02	0.19	0.06	0.2	0.09	0.21	0.1	0	0.06	0.33	0.04	0.19	0.25	0.33	0.04	0.1
XLOC_004494	0.7	0.35	0.73	0.66	0.34	0.48	0.33	0.61	0.99	1.15	0.97	1.25	1.48	1.66	1.36	1.49	1.24	0.7	0.86	0.87	0.88	0.9	1.04	1.05	0.72	0.57	1.16	0.93	0.96	0.55	0.74	1.15	0.64	1.26	1.04	0.92	1.2	1.36	1.33	0.9	0.6	0.88	0.79	0.98	0.62	0.62	0.75	1.06	0.42
XLOC_004497	0	0.08	0	0.09	0	0	0	0	0	0.06	0	0.06	0.23	0.07	0.1	0.07	0	0.09	0.12	0.17	0.05	0.07	0.1	0.15	0.03	0	0	0.25	0.26	0	0	0	0	0.18	0	0.12	0	0	0.07	0.07	0	0.39	0.5	0	0	0	0.12	0.73	0.27
XLOC_004498	0.6	0.35	0.1	0.11	0.17	0.17	0.18	0.18	0	0	0	0	0	0	0	0	0.04	0	0	0	0	0	0	0.02	0	0.02	0	0	0	0	0	0	0	0	0	0	0	0	0	0	0	0	0.02	0	0	0	0	0.02	0
XLOC_004500	0.36	0.37	0.05	0.18	0.02	0.04	0.06	0.09	0.26	0.17	0.3	0.41	0.35	0.47	0.56	0.17	0.15	0.26	0.15	0.21	0.07	0.3	0.26	0.21	0.06	0.45	0.12	0.24	0.14	0.16	0.09	0.19	0.09	0.68	0.24	0.38	0.17	0.55	0.3	0.27	0.21	0.27	0.22	0.14	0.03	0.26	0	0.23	0.11
XLOC_004501	0.08	0.06	0.07	0.02	0	0.03	0.08	0.18	0.46	0.26	0.8	0.3	0.26	0.36	0.31	0.54	0.13	0.21	0.54	0.13	0.19	0.22	0.21	0.31	0.22	0.24	0.42	0.1	0.06	0.05	0.23	0.16	0.19	0.28	0.86	0.3	0.45	0.32	0.6	0.6	0.19	0.03	0.26	0.16	0	0.18	0.43	0.12	0.12
XLOC_004505	0	0.06	0.46	0.17	0.08	0.07	0.31	0.19	0.07	0.27	0.07	0.22	0.02	0.19	0.21	0.15	0.06	0.07	0	0	0.08	0	0.34	0	0.21	0.09	0.07	0	0.16	0	0	0.16	0	0.19	0.16	0	0.22	0	0.1	0.1	0.02	0.02	0.24	0	0	0.15	0.46	0.17	0.05
XLOC_004509	0.55	0.12	0.21	0.16	0.2	0.28	0.12	0.24	0.1	0	0.28	0.19	0.08	0.04	0.21	0.12	0	0	0.07	0.04	0	0	0.07	0.03	0.28	0.07	0.07	0.07	0.05	0.02	0.19	0.02	0.13	0.24	0.39	0.16	0.06	0.09	0.19	0.27	0.08	0.1	0.14	0.21	0.04	0.06	0.01	0.09	0
XLOC_004511	0	0	0	0	0.83	0.24	0.06	0.19	0	0	0	0	0	0	0	0	0	0	0	0	0	0	0	0	0	0	0	0	0	0	0	0	0	0	0	0	0	0	0	0	0	0	0	0	0	0	0	0	0
XLOC_004517	1.47	1.48	1.33	1.15	1.09	0.56	0.67	1.15	0.17	0.36	0.43	0.18	0.46	0.32	0.73	0.45	0.45	0.25	0.43	0.28	0.11	0.42	0.35	0.38	0.34	0.51	0.47	0.33	0.29	0.54	0.08	0.21	0.85	1.26	0.42	0.15	0.23	0.74	0.51	0.58	0.75	0.52	0.73	0.54	0.4	0.38	0.42	0.67	0.25
XLOC_004519	0	0.07	0.02	0	0	0	0.04	0.03	0.04	0.06	0.12	0.08	0.04	0.05	0.04	0.03	0.19	0.02	0.06	0.04	0.07	0.04	0.07	0.14	0.12	0	0.02	0	0	0	0.07	0.04	0.04	0.04	0.04	0	0	0	0.05	0.07	0.09	0	0.02	0.02	0	0	0	0.06	0.02
XLOC_004520	0	0.08	0.21	0	0.35	0	0.05	0	0.03	0	0.09	0	0	0	0	0	0	0	0.06	0.06	0.59	0	0.05	0.1	0	0	0.13	0	0.15	0.04	0	0	0	0	0	0	0.2	0.12	0	0.07	0.03	0.03	0	0.06	0.56	0.18	0	0.08	0
XLOC_004522	0.59	0.36	0.49	0.53	0.34	0.27	0.25	0.34	0.04	0.01	0.06	0.13	0.26	0.17	0.15	0.32	0.1	0	0.06	0.04	0	0	0.06	0.19	0	0.07	0.06	0.22	0	0.07	0	0.03	0.34	0.2	0.07	0.11	0	0.08	0	0.06	0.1	0	0.02	0.05	0.08	0.09	0	0.11	0
XLOC_004525	0.33	0	0	0	0.19	0.29	0.06	0	0.78	0.14	0.31	0.35	0.61	0.26	0.15	0	0	0	0	0	0	0	0.11	0	0	0	0	0	0	0	0	0	0.91	0.39	3.03	0.52	2.61	1.71	0.69	1.04	0.25	0.36	0.15	0	0.39	0	0.13	0	0
XLOC_004527	0	0	0	0	0	0	0	0	0.03	0	0.07	0.07	0.14	0.12	0.01	0.05	0.04	0.08	0	0	0.02	0.1	0.09	0	0.02	0	0	0.11	0.02	0.02	0.06	0.02	0	0.06	0.03	0.05	0.09	0.17	0	0.06	0	0.12	0	0	0	0	0	0	0.06
XLOC_004533	0	0.04	0.05	0.08	0	0	0.03	0.03	0.17	0.06	0.03	0.04	0	0.02	0.1	0.02	0.03	0.19	0.05	0.05	0	0	0	0.04	0.17	0	0.06	0.08	0	0.01	0	0.05	0.18	0.29	0.12	0.02	0	0.03	0.13	0.07	0.09	0.05	0	0	0	0	0	0	0.04
XLOC_004541	0	0.03	0	0.2	0	0.15	0.04	0.19	0.15	0.13	0.07	0.52	0.2	0.31	0.18	0.19	0.28	0.28	0.22	0.79	0.32	0.56	0.25	0.17	0.25	0.07	0.38	0.46	0.05	0.73	0.09	0.07	0.06	0.09	0.14	0.23	0.05	0.08	0.22	0.17	0.34	0.2	0.5	0.8	0.19	0.3	0.71	0.41	0
XLOC_004545	0.73	0.47	0.32	0.35	0.77	0.46	0.39	1.34	0.57	0.1	0.33	0.13	0.2	0.38	0.29	0.31	0.26	0.15	0.51	0.27	0.05	0.2	0.38	0.5	0	0.08	0.41	0.28	0.28	0.08	0.21	0.75	0.08	0.08	0.31	0.38	0.1	0.09	0.26	0.06	0.28	0.14	0.55	0.42	0.18	0.15	0.19	0.7	0.16
XLOC_004547	0	0	0	0	0	0	0	0	0.03	0.05	0.1	0	0.05	0.05	0.03	0	0.14	0	0.64	0.05	0.31	0	0	0.04	0.22	0.05	0.25	0.2	0.3	0.2	0	0	0.14	0	0.36	0	0.54	0.35	0.11	0	0.13	0.27	0.16	0	0.12	0.03	0.07	0	0
XLOC_004549	0	0.14	0	0	0	0	0.05	0.09	0.29	0.18	0.29	0.32	0.05	0.57	0.22	0.38	0.5	0.19	0.2	0.39	0.5	0.31	0	0.21	0.73	0.19	0.06	0.34	0.03	0.15	1.16	0.03	0.29	0.37	0.33	0.93	0.35	0.31	0.23	0.74	0.03	0	0	0.23	0.06	0.06	0.2	0.48	0.17
XLOC_004550	0.03	0.15	0.1	0.19	0	0.14	0.05	0.1	0.14	0.09	0.2	0.03	0	0.09	0.06	0.02	0.04	0	0.17	0.24	0.07	0.17	0	0.12	0.05	0.09	0.32	0	0.22	0.26	0.15	0.03	0.08	0	0.03	0.21	0.05	0.11	0.19	0	0.03	0	0.03	0.07	0.08	0	0.11	0.02	0.06
XLOC_004553	0	0	0.05	0.16	0	0	0	0	0	0	0	0	0	0	0	0	0.05	0	0	0	0	0	0	0	0	0	0	0	0	0.45	0	0	0	0	0.13	0	0	0	0.08	0	0	0	0	0	0	0	0	0	0
XLOC_004554	0	0	0	0	0	0	0	0	0	0	0.13	0	0	0	0	0	0.04	0	0.57	0	0.1	0.27	0.22	0.41	0	0	0.03	0.03	0.28	0.22	0.09	0.21	0.04	0	0.03	0	0	0.06	0.07	0	0	0.03	0	0	0	0	0	0	0
XLOC_004555	0	0	0	0	0	0	0	0	0	0	0.16	0	0	0	0	0	0	0	0	0	0	0.1	0	0	0.66	0	0	0	0	0	0.13	0.39	0	0	0	0	0	0	0	0	0.04	0	0	0	0	0	0	0	0
XLOC_004560	0	0	0	0	0	0	0	0	0.08	0.06	0.07	0.11	0.04	0.02	0	0.06	0.17	0.4	0.05	0.16	0.13	0.22	0.07	0.11	0.29	0.09	0.15	0.15	0.15	0.18	0.17	0.11	0.08	0.03	0.03	0	0.02	0.06	0	0.04	0.05	0	0.02	0.06	0.1	0.04	0.13	0.05	0.1
XLOC_004561	0.24	0.01	0.02	0.01	0.03	0	0.01	0	0.25	0.15	0.09	0.24	0.22	0.12	0.06	0.12	0.1	0.08	0.09	0.12	0.3	0.07	0.24	0.21	0.09	0.13	0.3	0.14	0.19	0.27	0.11	0.08	0.07	0.15	0.07	0.15	0.13	0.17	0.21	0.21	0	0.03	0.01	0.02	0.09	0.01	0.06	0	0.17
XLOC_004567	0	0	0.06	0.03	0.04	0	0	0	0	0	0.02	0.07	0.22	0.02	0	0	0	0.06	0	0	0	0	0.13	0	0.02	0	0	0.06	0.18	0	0.04	0	0	0	0	0	0.07	0	0	0	0	0	0	0	0	0	0.17	0	0
XLOC_004569	0.24	0.1	0.04	0.05	0.12	0.2	0.11	0.05	0.16	0.25	0.26	0.11	0	0.08	0.03	0.07	0.27	0.29	0.21	0.06	0.05	0	0.16	0.15	0.2	0.24	0.12	0	0.18	0.05	0	0.04	0.19	0.39	0.22	0	0.1	0	0.07	0.13	0.05	0.23	0.05	0.06	0.07	0.07	0	0	0.3
XLOC_004572	0.06	0.12	0.09	0.14	0	0.05	0.49	0.37	0.25	0.19	0.28	0.16	0.23	0.3	0.17	0.21	0.09	0.46	0.18	0.17	0.27	0.36	0.29	0.26	0.97	0.13	0.2	0.28	0.48	0.14	0	0	0.26	0.27	0.84	0.47	0.31	0.12	0	0.34	0	0	0.03	0.06	0.04	0.07	0.08	0.57	0.13
XLOC_004576	0	0	0	0	0	0	0	0	0	0	0.08	0	0	0	0	0	0	0.06	0.12	0.08	0.33	0.15	0	0.03	0	0.09	0.16	0	0	0	0.09	0.2	0.38	0.18	0.08	0.04	0	0	0	0	0.09	0.33	0.16	0	0.1	0.05	0	0	0.09
XLOC_004578	0.07	0.02	0.02	0.02	0	0.04	0.08	0.04	0.09	0.18	0.44	0.14	0.12	0.08	0.07	0.17	0.14	0	0.11	0.09	0.04	0.05	0.16	0.1	0	0	0.04	0.08	0.15	0.04	0	0	0.18	0.1	0.34	0.07	0.54	0.05	0.05	0.08	0.1	0.05	0.38	0.16	0.09	0.22	0.02	0.11	0.1
XLOC_004579	0	0	0.09	0	0	0	0.04	0	0.12	0.1	0.06	0	0.09	0	0.09	0.02	0.03	0	0.04	0	0.11	0.1	0.06	0	0.04	0	0	0	0	0.12	0	0.05	0.11	0.12	0.07	0.12	0	0.21	0.18	0	0.13	0.04	0.07	0	0.02	0	0.03	0.03	0.04
XLOC_004580	0.25	0.25	0.11	0.04	0.03	0.14	0.21	0.02	0.63	0.54	0.52	0.5	0.58	0.76	0.46	0.47	0.48	0.39	0.27	0.26	0.31	0.33	0.19	0.39	0.4	0.61	0.44	0.34	0.35	0.25	0.24	0.26	0.31	0.44	0.46	0.24	0.27	0.26	0.57	0.34	0.34	0.49	0.86	0.42	0.36	0.52	0.31	0.41	0.53
XLOC_004581	0	0	0	0	0	0	0	0	0.02	0	0	0	0.02	0	0.01	0	0.35	0.28	0.13	0.21	0.13	0.05	0.17	0.16	0.71	0.76	0.08	0.11	0.07	0.37	0.09	0.29	0.35	1.22	0.04	0	0.05	0	0	0	0.43	1.14	0.07	0.28	0.04	0.05	0.2	0.26	0.22
XLOC_004582	0.66	0.38	0.38	0.13	0.16	0.2	0.31	0.12	0.25	0.54	0.4	0.33	0.39	0.13	0.18	0.48	1	1.41	1.38	1.88	0.93	1.21	0.74	1.02	0.54	1.04	0.77	0.83	0.17	0.46	0.46	0.33	1.11	0.84	0.31	0.2	0.29	0.41	0.5	0.08	0.92	0.73	1.25	0.65	0.65	1.08	0.68	0.27	0.83
XLOC_004585	0.21	0.11	0.12	0.25	0.47	0.6	0.05	0.09	0.38	0.2	0.36	0.23	0.46	0.15	0.06	0.19	0.19	0.78	0.65	0.99	1.11	0.52	0.21	0.73	0.18	0.53	0.18	1.52	0.67	0.29	0.2	0.72	0.12	0.59	0.15	0.1	0.09	0.28	0.37	0	0.32	0.55	0.36	0.57	0.25	0.51	0.29	0.25	0.54
XLOC_004588	0.19	0.07	0.11	0.15	0	0.04	0.04	0.09	0.38	0.37	0.89	0.8	0.35	0.22	0.14	0.46	0.45	0.34	0.53	0.61	0.27	0.2	0.28	0.25	0.61	0.52	0.4	0.39	0.34	0.3	0.51	0.55	0.09	0.37	0.61	0.33	0.04	0.07	0.53	0.28	0.25	0.2	0.58	0.4	0.34	0.14	0.44	0.43	0.19
XLOC_004590	0.06	0.16	0.04	0	0.09	0	0	0.11	0.46	0.46	0.05	0.25	0.13	0.27	0.07	0.26	0.13	0.39	0.27	0.06	0.14	0.07	0.1	0.1	0	0.1	0.02	0	0	0	0.1	0.04	0.17	0.13	0.28	0.56	0.77	0.56	0.52	0.47	0	0	0	0	0.25	0	0.24	0.02	0.13
XLOC_004591	0.51	0.4	0.09	0.87	0.23	1.08	0.44	0.46	0.1	0.02	0.1	0.21	0.11	0.12	0.1	0.06	0.2	0.1	0.16	0.26	0.03	0.25	0.14	0.24	0.12	0.03	0.01	0.07	0.04	0.11	0.05	0.03	0.09	0.07	0.03	0.03	0	0	0.04	0.18	0.02	0.17	0.02	0.19	0.04	0.19	0.11	0.25	0.07
XLOC_004592	0.23	0.28	0.16	0.47	0.58	0.36	0.21	0.44	0.16	0.14	0.1	0.29	0.4	0.8	0.3	0.16	0.16	0.18	0.42	0	0.08	0.39	0.04	0.43	0.36	0.15	0.18	0.43	0.06	0.57	0.05	0.31	1.03	0.54	0.17	0.45	0	0.8	0.42	0.1	0.45	0.25	0.36	0.23	0.14	0.19	0.31	0.09	0.36
XLOC_004594	0	0	0	0	0	0	0	0	0.05	0	0.02	0.21	0	0.07	0.04	0.09	0	0	0.08	0.08	0	0	0.06	0	0	0	0	0	0	0	0.13	0.15	0	0	0.64	0.32	0	0.21	0.19	0.23	0	0	0.27	0	0	0	0.03	0	0
XLOC_004595	0	0	0.07	0.11	0.14	0.08	0	0.04	0.03	0	0.1	0.22	0.05	0	0.23	0.08	0	0	0	0	0	0.11	0.07	0	0	0	0.08	0.24	0	0.31	0.45	0.4	0.03	0	0.79	0.78	0.24	0.39	0.92	0.84	0	0	0.13	0.14	0	0.08	0.19	0	0
XLOC_004596	0.13	0	0.83	0.3	0.38	0.4	0.31	1.17	0.5	0.29	3.01	1.13	0.67	0.96	2.78	1.73	0.12	0.23	0.6	0.12	0.62	0.88	0.68	0.29	0.41	0.02	0.86	0.84	0.37	1.07	0.39	0.71	0.71	0.25	6.66	2.71	1.98	3.66	5.09	4.76	0.07	0.05	1.22	1.29	0.76	1.23	2.49	0.81	0.19
XLOC_004600	0.84	1.35	0.16	0.29	0.44	0.22	0.14	0.39	0	0	0.01	0	0	0	0	0	0	0	0.01	0	0	0	0	0	0	0	0	0	0	0	0	0	0	0	0	0	0	0	0	0	0	0	0	0	0	0	0	0	0
XLOC_004601	0.05	0.27	0	0.02	0	0	0.09	0	0	0	0	0	0	0	0	0	0	0	0	0	0	0	0	0	0	0	0	0	0	0	0	0	0	0	0	0	0	0	0	0	0	0	0	0	0	0	0	0	0
XLOC_004603	0	0	0	0	0	0	0	0	0	0	0	0	0	0	0	0	0.09	0	0	0	0	0	0.07	0	0	0	0	0	0.1	0	0	0	0	0	0	0	0	0	0	0	0	0	0	0	0	0	0.04	0	0.31
XLOC_004607	0.2	0.02	0.13	0.27	0	0.06	0.08	0.1	0.05	0.24	0.07	0.11	0.12	0.06	0.15	0.23	0.06	0.09	0.07	0.07	0.22	0.14	0	0.04	0.04	0.02	0.04	0.26	0.07	0	0.04	0.1	0.05	0.03	0.06	0	0.02	0	0.03	0.03	0.17	0.17	0.37	0.19	0.2	0.11	0.12	0.24	0.13
XLOC_004614	0.06	0	0	0	0	0	0	0.11	0.11	0	0	0	0	0.03	0.07	0.03	0.04	0.05	0	0.06	0	0.07	0.19	0	0.67	0	0	0	0.07	0	0	0.04	0	0.27	0	0	0.15	0.06	0.07	0	0.16	0.03	0.03	0.63	0	0.07	0	0.08	0.07
XLOC_004615	0.08	0.23	0.12	0.27	0.29	0.11	0.04	0.07	0.07	0.07	0.39	0.02	0.11	0.19	0.14	0.2	0.21	0.13	0	0.04	0.15	0.05	0.17	0.14	0.17	0	0.24	0.33	0.13	0.23	0.02	0.34	0.12	0.31	0	0.17	0	0	0.34	0.05	0.12	0.05	0.14	0.15	0.05	0.23	0.11	0.03	0.1
XLOC_004618	0	0	0	0	0	0	0	0	0.03	0	0.03	0	0	0.03	0.03	0.12	0.33	0.08	0.1	0.1	0.19	0.13	0.12	0.31	0.09	0	0.26	0.11	0	0	0	0.19	0.11	0	0.05	0	0	0	0	0.12	0.28	0.17	0.17	0.03	0.03	0.03	0.32	0.21	0.23
XLOC_004631	0.23	0.26	0.76	0.66	0.22	1.57	0.49	0.34	0.31	0	0.04	0.04	0.37	0.34	0.21	0.22	0.27	0	0.08	0.15	0.21	0.28	0.42	0.19	0	0	0.47	0.08	0.14	0	0.37	0.05	0	0	0.14	0.07	0.07	0.63	0.35	0.26	0.42	0.91	0.6	0.27	0.13	0.23	0	0.1	0
XLOC_004636	0.02	0.08	0.14	0.2	0.13	0.03	0.09	0.16	0.05	0.02	0.03	0.19	0.16	0.11	0.09	0.17	0.04	0.06	0	0.02	0.03	0.08	0.08	0.06	0.03	0.04	0.21	0.05	0.02	0.01	0	0.18	0.27	0.12	0.19	0.24	0.14	0.12	0.21	0.68	0	0.04	0.12	0.19	0.12	0.28	0	0.05	0.08
XLOC_004637	0	0.02	0	0.02	0.01	0	0.06	0.01	0.02	0.01	0.18	0	0	0	0.05	0.05	0.16	0.12	0.09	0.28	0.13	0.13	0.21	0.18	0.32	0.19	0.02	0.18	0.29	0.11	0.01	0.06	0.64	0.53	0.22	0	0.05	0.19	0.03	0.01	1.75	2.01	1.04	1.42	1.56	1.26	1.19	1.53	0.24
XLOC_004639	0	0	0	0	0	0	0	0	0	0	0	0	0	0	0	0	0.07	0.07	0	0	0.4	0	0.15	0.04	0.16	0.05	0	0.05	0	0	0	0.12	0.56	0.07	0.09	0	0	0.05	0.06	0	0.78	0.67	0.08	0.15	0.72	0.15	0.73	0.33	0.33
XLOC_004640	0	0	0	0.27	0	0	0.14	0	0.23	0	0.15	0	0.01	0.01	0	0.24	0.27	0.08	0.45	0.51	0.47	0.21	0.41	0.49	0.43	0.5	0.26	0.32	0.03	0.1	0.74	0.43	1.06	0.68	0.21	0.29	0.15	0.23	0.4	0	1.64	1.94	0.96	1.54	0.92	1.42	1.11	1.43	0.2
XLOC_004641	0.07	0.06	0.05	0.06	0.08	0.09	0.06	0.06	0.12	0.12	0.35	0.12	0.04	0.06	0.06	0.34	0.8	0.47	0.7	0.98	0.64	0.61	0.63	0.98	0.84	0.9	0.31	0.76	0.21	0.41	0.41	0.53	1.27	1.79	0.53	0.17	0.1	0.13	0.29	0.08	2.85	3.58	2.04	2.25	1.77	1.9	2.39	2.18	0.54
XLOC_004643	0	0	0	0	0	0	0	0.11	0	0.06	0.12	0.03	0	0	0	0.12	0.07	0.22	0.1	0.09	0.13	0	0.08	0.33	0.12	0.07	0.01	0.05	0	0.1	0.15	0	0.14	0.19	0.04	0.05	0	0	0	0	0.53	0.35	0.64	0.73	0.78	0.14	0.49	0.4	0
XLOC_004645	0	0	0	0	0	0	0.12	0	0.16	0.03	0	0	0.11	0.19	0.37	0.04	0	0	0	0	0	0	0	0.11	0	0	0	0	0	0	0	0.85	0	0.05	0	0	0	0.62	0	0	0	0	0	0	0.43	0	0	0	0
XLOC_004646	0.2	0.02	0.11	0.08	0.18	0.11	0.17	0.18	0.29	0.1	0.87	0.31	0.23	0.14	0.87	0.84	0.01	0.04	0.24	0.06	0.11	0.07	0.06	0.11	0.18	0.03	0.33	0.12	0.14	0.13	0.3	0.34	1.27	0.67	2.03	1.85	0.92	0.9	1.63	1.85	0.12	0.04	0.43	0.3	0.06	0.14	0.27	0.09	0.07
XLOC_004647	0.14	0.02	0.04	0.06	0.1	0.02	0.11	0.12	0.18	0.02	0.15	0.11	0.13	0.08	0.37	0.32	0.03	0	0.05	0.04	0.13	0.08	0.04	0.09	0.06	0	0.1	0.08	0.23	0.05	0.13	0.24	0.49	0.1	0.89	0.65	0.46	0.68	0.77	1.27	0.09	0.02	0.08	0.13	0.06	0.14	0.21	0.16	0.03
XLOC_004649	0	0.02	0	0.02	0	0.05	0	0	0.12	0.08	0.13	0.02	0	0.02	0	0.3	0	0	0.03	0.03	0	0	0	0	0.03	0	0	0	0	0.15	0.23	0	0.04	0.18	0.06	0.06	0	0.06	0	0.34	0	0	0	0.03	0.11	0	0.02	0.1	0
XLOC_004651	0	0.03	0.28	0.06	0	0	0.04	0	0.07	0	0	0.04	0.02	0.27	0.04	0.05	0.11	0.06	0.04	0.04	0	0	0.03	0.03	0.02	0	0.02	0	0.02	0.02	0	0.05	0.06	0.09	0.07	0.35	0.07	0	0	0.04	0.2	0.04	0.11	0.06	0	0.02	0.11	0.05	0
XLOC_004654	0.46	1.36	0.47	0.57	0.49	0.79	0.7	0.57	0.58	0.8	0.26	0.5	0.49	0.6	0.46	0.57	0.33	0.7	0.38	0.56	0.48	0.05	0.27	0.46	0.51	0.44	0.38	0.4	0.09	0.73	0.08	0	0.08	0.45	0.39	0.3	0.39	0.39	0.31	0.52	0.34	0.52	0	0.46	0.2	0.32	0.96	0.41	0.56
XLOC_004656	0	0.18	0.03	0.11	0.09	0.27	0.04	0.12	0	0.31	0.19	0	0	0	0	0.1	0.06	0.07	0.09	0.09	0	0.05	0	0.08	0.03	0	0	0	0	0	0.29	0	0.16	0	0	0	0	0	0	0.2	0	0	0.28	0.3	0	0	0	0	0
XLOC_004657	0.14	0.15	0.34	0.33	0.08	0.02	0.44	0.25	0.2	0.09	0.01	0.1	0.21	0.13	0.14	0.13	0.02	0.09	0.03	0.16	0	0	0.09	0.05	0.11	0.03	0.09	0.07	0.23	0.02	0.11	0.07	0	0.1	0.13	0.22	0.02	0.2	0	0.16	0.14	0	0.17	0.27	0.13	0.02	0.11	0.13	0.03
XLOC_004663	0	0	0.01	0	0	0	0	0	0.21	0.15	0.26	0.26	0.85	0.97	0.43	0.8	1.05	1.26	0.93	1.36	1.2	1.14	0.69	0.86	1.33	0.75	0.31	0.31	0.58	0.67	0.48	0.75	1.09	0.91	0.49	0.3	0.35	0.59	0.14	0.31	4.21	3.41	1.67	2.13	2.16	1.88	1.69	1.51	1.46
XLOC_004664	0	0	0	0	0	0	0	0	0	0	0	0.04	0	0	0.2	0	0	0	0.15	0	0.07	0	0	0	0.69	0	0	0.08	0	0.26	0	0.04	0.05	0	0	0.07	0.12	0	0	0	0.28	0.28	0	0.29	0.3	0.43	0	0	0.24
XLOC_004666	0.27	0.05	0.12	0.16	0	0	0.06	0.54	0.56	0.13	0.18	0.11	0.15	0.08	0.21	0.45	0.02	0.63	0.07	0.23	0.19	0.17	0.05	0.18	0.17	0.15	0.17	0.05	0.09	0	0.15	0.34	0.4	0.03	0.16	0.17	0.03	0.07	0.08	0.04	0.58	0	0.29	0.1	0	0.25	0.19	1.06	0.39
XLOC_004667	0	0	0	0.19	0	0	0	0	0.02	0.02	0.18	0.2	0	0.02	0.02	0.06	0.05	0.27	0	0	0.03	0	0.06	0.03	0.04	0.04	0.1	0.22	0.11	0	0.09	0.17	0.05	0.21	0.07	0.03	0	0	0.04	0.2	0	0	0.1	0.07	0	0.02	0.07	0.22	0.2
XLOC_004668	0	0.06	0	0	0	0	0	0	0.14	0.13	0.36	0.73	0.26	0.05	0.29	0.28	0.06	0	0	0.04	0.11	0	0.03	0.07	0.14	0	0	0.13	0	0	0	0	0	0.03	0.49	0.36	0	0.08	0.61	0	0	0	0	0	0	0	0	0	0
XLOC_004669	0.02	0.02	0.04	0.01	0.06	0.04	0.09	0.03	0.11	0.08	0.12	0.17	0.33	0.33	0.33	0.21	0.21	0.18	0.18	0.11	0.05	0.13	0.09	0.24	0.14	0.07	0.16	0.12	0.06	0.15	0.06	0.16	0.16	0.22	0.05	0.04	0.02	0.14	0.09	0.04	0.14	0.19	0.1	0.04	0.04	0.05	0.14	0.11	0.16
XLOC_004677	0.18	0.26	0.13	0.19	0.21	0.21	0.33	0.63	0.82	0.57	0.3	0.47	0.89	0.95	0.55	1.04	0.6	0.74	0.18	0.29	0.49	0.33	0.31	0.46	0.9	0.3	0.39	0.36	0.67	0.57	0.4	0.62	0.52	0.09	0.22	0.41	0.51	0.59	0.69	0.37	0.4	0.47	0.2	0.42	0.25	0.34	0.28	0.55	0.57
XLOC_004680	0.08	0	0.06	0	0	0	0	0.05	0.27	0.14	0.07	0.13	0.09	0.11	0.09	0.09	0.29	0.56	0.08	0.03	0	0.07	0	0.14	0.06	0.22	0.15	0.01	0	0.19	0	0.45	0.1	0.06	0	0.24	0.12	0.28	0.09	0.52	0.09	0.16	0	0.03	0	0	0.15	0	0.37
XLOC_004681	0	0	0.12	0	0	0.2	0.11	0.05	0.07	0.03	0.3	0.15	0.16	0.1	0.41	0.17	0.04	0.09	0	0.17	0.1	0	0.18	0	0.16	0.13	0.06	0.18	0.07	0.1	0	0.11	0	0.13	0.11	0.85	0.05	0	0.33	0.13	0	0	0.16	0.32	0	0	0.23	0.16	0.07
XLOC_004683	0.02	0	0.06	0	0	0	0.04	0	0.07	0	0.17	0.14	0.04	0.11	0.01	0.08	0.11	0.07	0.02	0.02	0.06	0.05	0.04	0.17	0.04	0	0.03	0.05	0	0	0.04	0.29	0.03	0.02	0.04	0.09	0.13	0.07	0.16	0.03	0.04	0.06	0.04	0.12	0.01	0.07	0.11	0.08	0
XLOC_004684	0.16	0.14	0.18	0.04	0.11	0.13	0.16	0.2	0.13	0.12	0.15	0.1	0.18	0.07	0.21	0.27	0.06	0.03	0.1	0	0.13	0.02	0	0.1	0.13	0.07	0.14	0.03	0.01	0.1	0.1	0.04	0.21	0.06	0.04	0	0.05	0.2	0.18	0.05	0.09	0.02	0.11	0.07	0.03	0.06	0.16	0.09	0.1
XLOC_004689	0.06	0.11	0.09	0.03	0	0.06	0	0.03	0.09	0.1	0.15	0.03	0	0.11	0.14	0.35	0.34	0.55	0.13	0.22	0	0.04	0.36	0.27	0.16	1.43	0.04	0.25	0.22	0.04	0	0.08	0.47	0.24	0.15	0.09	0.06	0.2	0.19	0.43	0.41	0.39	0.18	0.39	0	0.02	0.13	0.22	0.47
XLOC_004694	0	0	0	0	0	0	0	0	0	0	0.02	0	0.02	0	0.02	0.06	0.09	0	0.03	0	0	0	0.08	0.06	0.06	0	0	0	0.02	0	0	0	0	0	0	0	0	0.03	0	0.04	0.05	0	0	0	0	0	0	0	0.04
XLOC_004695	0.21	0.22	0.17	0.29	0.16	0.63	0.31	0.38	0.21	0.25	0.63	0.37	0.25	0.95	0.85	0.76	0.15	0.09	0.24	0.15	0.25	0.74	0.35	0.37	0.1	0.08	0.46	0.33	0.39	1.25	0.37	0.52	0.86	0.68	1.78	1.83	1.39	5.59	1.45	3.32	0.13	0.14	0.19	0.57	0.48	0.87	0.99	0.63	0.05
XLOC_004697	1.3	0.51	0.84	0.46	0.16	0.48	1.12	0	0.9	0.89	1.38	0.75	0.3	0.5	0.86	0.02	0.48	0.75	0.93	0.38	0.25	0.51	0.33	0.14	1.01	0.65	1.03	0.43	0.42	0.91	0.89	0	0.84	0.21	1.06	0.73	0.26	0.75	0.35	0	1.45	0.61	0.64	0.88	0.67	0.79	1.09	0.04	1.16
XLOC_004700	0.14	0.31	0.49	0.24	0.11	0.12	0.13	0.27	0.05	0.07	0.22	0.09	0.03	0.03	0.03	0.03	0	0	0.17	0.05	0.03	0.03	0.02	0	0	0.06	0.22	0.03	0	0	0.03	0	0	0.02	0.05	0.11	0.1	0.23	0	0	0.03	0.09	0.13	0.09	0	0.1	0	0	0.06
XLOC_004701	0	0.1	0.14	0.31	0.19	0	0	0	0.29	0.18	0.13	0.1	0.08	0.08	0.14	0.09	0.1	0.26	0	0.1	0.71	0.06	0.16	0	0.03	0.22	0.17	0.13	0	0	0	0.33	0	0	0	0	0.08	0	0.11	0.06	0.03	0.13	0.19	0	0.23	0.24	0.37	0.17	0.17
XLOC_004704	0.07	0	0	0	0	0	0	0	0	0.08	0	0	0	0	0	0	0	0	0	0	0	0	0	0	0	0	0	0	0	0	0	0.09	0	0	0	0	0.32	0	0	0	0	0.2	0	0.78	0	0	0	0	0.08
XLOC_004706	0.09	0.03	0.06	0	0	0.26	0	0	0.15	0.02	0.02	0.23	0.02	0	0.05	0.02	0.06	0.37	0	0.25	0.12	0.26	0.24	0.11	0.05	0.5	0	0.11	0	0.05	0	0.03	0.31	0.19	0	0.08	0	0.04	0	0	0.19	0.02	0	0.3	0.15	0.13	0.06	0	0.1
XLOC_004707	0	0.23	0.22	0.24	0.34	0.26	0.32	0.34	0.13	0.18	0.2	0.08	0.33	0.24	0.15	0.44	0.14	0.03	0.04	0.11	0.07	0.14	0	0.26	0.17	0.4	0.11	0.36	0.14	0	0.08	0.09	0.06	0.03	0.25	0	0	0.04	0.4	0.47	0.17	0.38	0.21	0	0.25	0.23	0.65	0.67	0.3
XLOC_004713	0.05	0.12	0.06	0.02	0.1	0.09	0.05	0.07	0.74	0.39	0.6	0.48	0.35	1.08	0.24	0.28	0.26	0.4	0.05	0.38	0.23	0.19	0.16	0.13	0.46	0.37	0.14	0.31	0.5	0.35	0.26	0.3	0.39	0.36	0.34	0.93	0.62	0.53	0.03	0.41	0.04	0.27	0.26	0.36	0.05	0.02	0.38	0.07	0.52
XLOC_004715	0	0	0	0	0	0	0	0	0	0	0	0	0	0	0	0	0.45	0.11	0.02	0.14	0.03	0.12	0	0	0.3	0.15	0.03	0	0.02	0.02	0.03	0.01	0.21	0.39	0.03	0.02	0	0	0	0	0.13	0.19	0.07	0.15	0.02	0.03	0.04	0	0.13
XLOC_004716	0	0	0	0	0	0	0	0	0	0	0	0	0	0	0	0	0.83	0.17	0.07	0.74	0.1	0.26	0.03	0.09	0.43	0.44	0.14	0.09	0	0.04	0	0	0.84	1.34	0.07	0.07	0	0	0.08	0	0.3	0.22	0.02	0.09	0.09	0.11	0.05	0.12	0.45
XLOC_004718	0	0	0	0.11	0	0	0	0	0.06	0.03	0.15	0.43	0	0.05	0.11	0.11	0.07	0.19	0.05	0.23	0	0	0.08	0	0.08	0	0	0.15	0	0	0.13	0	0	0	0	0	0	0	0.11	0.05	0.05	0	0	0	0	0	0	0	0.05
XLOC_004721	0	0	0	0	0	0	0	0	0.04	0.01	0.13	0.02	0.01	0.01	0.01	0.01	2.09	2.1	1.55	2.09	1.52	1.38	1.26	0.98	1.85	1.33	1.11	1.92	0.94	1.02	0.51	0.56	1.05	0.72	0.26	0.19	0.01	0.3	0.09	0.04	1.71	0.95	1	1.44	0.93	0.97	0.86	0.48	1.77
XLOC_004723	0.02	0	0	0	0	0.02	0	0.04	0.01	0	0.04	0	0.11	0.04	0	0	0	0	0	0.05	0.02	0	0.02	0	0.08	0	0.08	0.01	0.03	0	0	0.03	0.11	0	0	0.05	0.04	0.05	0.32	0	0.05	0.05	0.07	0	0	0	0	0.13	0.06
XLOC_004724	0	0	0	0	0.11	0	0.21	0	0.07	0.3	0.15	0.94	0.25	0.32	0.6	0.2	0.45	0.4	0.12	0.11	0.05	0	0.05	0.54	0.16	0.34	0.32	0	0.04	0.14	0.12	0.07	0.29	0.59	0.43	0.33	0.05	0	0.73	0.26	0.13	0.03	0.13	0.14	0	0.1	0	0.04	0.19
XLOC_004725	0	0	0.11	0	0	0.07	0.04	0	0.09	0.02	0.02	0	0	0	0.17	0	0.03	0.18	0.12	0.04	0.07	0.05	0	0.13	0.24	0.13	0.32	0.04	0	0.09	0.08	0.02	0	0	0.04	0.08	0	0.92	0	0.35	0.13	0.08	0.3	0	0.05	0.09	0.13	0	0.17
XLOC_004727	0	0	0	0	0	0	0	0	0	0	0	0	0	0	0	0	0.2	0.5	0.15	0.16	0.12	0.02	0.09	0.1	0.26	0.14	0.11	0.08	0.04	0.08	0.01	0	0.2	0.1	0	0	0	0.05	0	0	0.26	0.12	0.03	0.1	0.2	0.11	0	0.02	0.66
XLOC_004728	0	0	0	0	0	0	0	0	0.25	0.03	0.24	0.24	0.14	0.13	0.25	0.19	0.07	0.08	0.06	0	0.26	0.12	0.05	0.07	0.13	0.04	0.19	0.05	0.09	0.05	0.2	0.05	0.12	0.09	0.11	0.24	0.04	0.25	0.09	0.07	0.06	0.01	0.11	0.05	0.04	0.02	0	0	0.07
XLOC_004732	0	0	0.02	0	0.03	0	0	0	0	0	0	0.06	0.03	0.02	0	0.03	0.04	0.11	0.06	0	0.03	0	0	0.24	0.03	0.06	0.33	0.03	0	0	0.09	0.07	0.04	0	0.03	0	0	0	0	0	0	0.03	0	0	0	0	0.15	0.08	0
XLOC_004733	0	0.11	0	0	0	0	0	0	0.36	0.05	0.16	0.14	0.05	0.13	0.06	0.1	0.02	0.08	0	0.1	0	0.08	0	0.03	0.11	0.15	0.08	0.07	0.13	0	0	0	0.05	0.05	0	0.03	0	0.67	0	0.15	0	0	0.1	0.02	0.08	0.04	0.07	0	0.04
XLOC_004739	0.04	0.05	0	0.01	0	0.06	0.03	0	0.04	0.02	0.03	0.02	0.02	0.01	0.02	0	0.08	0.14	0.06	0.04	0.05	0.14	0.13	0.21	0.15	0.05	0.13	0.06	0	0	0.15	0	0.03	0	0.02	0.02	0.06	0.02	0	0	0.18	0.1	0	0.03	0.07	0	0.11	0.08	0.36
XLOC_004746	0	0	0.04	0	0.26	0.05	0.1	0	0.06	0.11	0.36	0.17	0.03	0	0.03	0.22	0.91	0.21	1.19	0.47	0.24	0.13	0	0.64	0.93	1.76	1.62	1.41	0.13	0.19	0	0.03	0.46	0.67	0.15	0.1	0	0.33	0	0	0	0	0	0	0	0	0	0	1.32
XLOC_004750	0.91	1.7	2.7	1.46	1.27	1.33	1.23	1.26	2.34	1.51	2.39	3.23	5.55	3.57	4.52	2.96	3.22	1.89	4.57	1.48	1.83	1.67	1.09	2.01	2.4	3.66	2.97	1.99	0.66	1.89	1.07	1.16	6.45	6.72	0.99	4.87	1.69	3.7	2.36	0.84	5.35	5.29	3.38	3.04	1.85	3.14	2.53	1.6	3.68
XLOC_004755	0	0	0	0	0	0	0	0	0	0	0	0	0	0	0	0	0.37	0.13	0.26	0.25	0.04	0	0.28	0.15	0.68	0.1	0	0.05	0.05	0.26	0.16	0.37	0.03	0.13	0	0.13	0	0.09	0.1	0	0.14	0.57	0.27	0.24	0	0.34	0.33	0.5	0.49
XLOC_004761	0.02	0.14	0	0.07	0	0.02	0.19	0.04	0.09	0.13	0.08	0.1	0.06	0.05	0.29	0.15	0.03	0.04	0.12	0	0.02	0.06	0.16	0.04	0	0.03	0.12	0.12	0	0.27	0.11	0.03	0.38	0.26	0.43	0.36	0.63	0.76	0.4	0.75	0	0.06	0.01	0.02	0.11	0.08	0.66	0.19	0.08
XLOC_004762	0.19	0.26	0	0.06	0	0.02	0.04	0.05	0.15	0.09	0.27	0.19	0.1	0.17	0.07	0.1	0.5	0.28	0.75	1.07	0.36	0.59	0.39	0.63	0.36	0.06	0.2	0.46	0.14	0.28	0.13	0.52	0.16	0.52	0.37	0.29	0.23	0.39	0.29	0.15	0.95	1.03	1.68	0.99	0.92	1.57	1.59	1.52	0.13
XLOC_004763	0.43	0.46	0.11	0.07	0.25	0.18	0.27	0.18	0.17	0.04	0.05	0.01	0.16	0.06	0.05	0.07	0.08	0.14	0.14	0.07	0.17	0.06	0.16	0	0.24	0.1	0.08	0.07	0.2	0.1	0.06	0.06	0.23	0.1	0.09	0.13	0.24	0.12	0.03	0	0.11	0.01	0.17	0.05	0.08	0.04	0.06	0.05	0.33
XLOC_004764	0.23	0.36	0.07	0.17	0.2	0.25	0.18	0.33	0.01	0.01	0	0.04	0.04	0	0	0.04	0.02	0	0.03	0.06	0.03	0	0.05	0.03	0.15	0.01	0.04	0.12	0.01	0.05	0	0	0.01	0.05	0	0.07	0	0	0	0	0.1	0.06	0.01	0.01	0	0.01	0.17	0.03	0.02
XLOC_004770	0.19	0.88	0.18	0.32	0.33	0.61	1.13	0.44	0.11	0.18	0.13	0.26	0.13	0.02	0.12	0.09	0.2	0	0.19	0.21	0.36	0.34	0.1	0.18	0.31	0.12	0.03	0.08	0.04	0.11	0	0.08	0.13	0.3	0.03	0.12	0.19	0.41	0.43	0.1	0.27	0.12	0.03	0	0.11	0.17	0	0.06	0.31
XLOC_004771	0.05	0.04	0.03	0.11	0.1	0.15	0.27	0.1	0.11	0.21	0.17	0.28	0.17	0.14	0.17	0.19	0.08	0.06	0.16	0.13	0.07	0.13	0.1	0.07	0.13	0.12	0.13	0.18	0.02	0.17	0.12	0.04	0.11	0.33	0.31	0.6	0.12	0.71	0.21	0.27	0.17	0.2	0.16	0.26	0.12	0.27	0.2	0.17	0.22
XLOC_004772	0	0.11	0.06	0.11	0.18	0.16	0.07	0.2	0.1	0.12	0.25	0.09	0.24	0.37	0.21	0.38	0.19	0.14	0.14	0.14	0.09	0.59	0.18	0.09	0.08	0.08	0.26	0.11	0.01	0.07	0	0.04	0.1	0.24	0.3	0.18	0	0.36	0.05	0.18	0.16	0.01	0.1	0.05	0.26	0.11	0	0.03	0.05
XLOC_004773	0.03	0.09	0.15	0.08	0.08	0.42	0.02	0.07	0.14	0.14	0.14	0.24	0.58	0.77	0.28	0.33	0.23	0.12	0.03	0.03	0.22	0.46	0.19	0.11	0.03	0.04	0.21	0	0.23	0.29	0.42	0	0.35	0.16	0.05	0.16	0	0.31	0.25	0.21	0.01	0.13	0.29	0.19	0.25	0.11	0.42	0.24	0.21
XLOC_004781	0	0	0.03	0.4	0.21	0.04	0	0	0.07	0.02	0	0.2	0.14	0.07	0	0	0	0.06	0	0.16	0.38	0.15	0	0.04	0.09	0.07	0.05	0.04	0.1	0.07	0	0.05	0.12	0	0.12	0.08	0.04	0	0	0	0.41	0.32	0.14	0.44	0.47	0.28	0.65	0.06	0.09
XLOC_004784	0.25	0.26	0.51	0.7	0.12	0	0.04	0.15	0.62	0.31	0.5	0.11	0.09	0.4	0.79	0.12	0	0.06	0.38	0.12	0.23	0.26	0.27	0.18	0.07	0.16	0.12	0.57	0.26	0.05	0.05	0.54	0	0	0.31	0.21	0	0	0.29	0.19	0.07	0	0	0.34	0.57	0.08	0	0.14	0.14
XLOC_004785	1.25	0.9	1.01	1.77	0.74	0.17	0.42	0.7	1.48	1.61	1.08	2.76	2.07	1.24	1.27	1.54	0.83	1.16	0.51	1.06	0.47	0.55	0.33	0.56	0.69	0.82	1.11	1.24	0.61	0.58	0.59	0.38	0.84	0.61	0.55	1.99	0.43	0.49	0.99	0.97	0.52	0.73	0.41	0.99	0.69	0.57	0.38	0.63	0.8
XLOC_004790	0.23	0.04	0	0	0	0.05	0	0	0.03	0	0.15	0.12	0.15	0.22	0	0.2	0.04	0	0	0	0	0.14	0	0	0	0	0	0.06	0	0	0	0.14	0.08	0.08	0	0.28	0.15	0	0	0.06	0	0.06	0.03	0	0	0	0.08	0.58	0
XLOC_004793	1.52	1.7	0.56	1.42	0.62	0.77	1.15	1.21	0.04	0.04	0.05	0.01	0.01	0	0.02	0.01	0.39	0.72	0.37	0.76	0.64	0.6	0.64	0.73	0.72	0.3	0.29	0.43	0.21	0.33	0.22	0.41	0.21	0.3	0.04	0	0	0.06	0.04	0.04	0.18	0.2	0.13	0.25	0.05	0.09	0.17	0.27	0.57
XLOC_004795	1.29	1.15	0.53	0.61	1.04	0.69	0.94	1.14	0	0	0	0	0	0	0	0.02	0.71	0.72	0.81	0.38	1.37	0.47	0.28	1.4	0.47	0.53	0.02	0.28	0.24	0.23	0.88	1.85	0.6	0.26	0	0	0	0.07	0.07	0.07	0.02	0.12	0.02	0.11	0.13	0	0.02	0.48	0.07
XLOC_004796	0	0.05	0	0	0	0	0.07	0	0.13	0.42	0	0	0	0	0	0.25	0.15	0.17	0.15	0	0.07	0	0	0	0.04	0	0	0	0.09	0	0.04	0.22	0.42	0.21	0.07	0	0	0	0.42	0	0.59	0.43	0.4	0.15	0.13	0.13	0.05	0.15	0
XLOC_004797	0	0.12	0	0.21	0.07	0	0	0.04	0.1	0.03	0.15	0.05	0.08	0.09	0.15	0	0	0.05	0.07	0.02	0.06	0	0.12	0.17	0.01	0.07	0.21	0	0.03	0	0.46	0	0	0	0.06	0.04	0.02	0.11	0.05	0.33	0	0	0.06	0	0.08	0	0.02	0.12	0
XLOC_004798	0.08	0.11	0	0.16	0	0	0.23	0.07	0.14	0.13	0.11	0.22	0.04	0.12	0	0.31	0.12	0	0	0.04	0.19	0	0	0.14	0	0.13	0.14	0.09	0	0.05	0.11	0	0	0.12	0.19	0	0	0.04	0.09	0	0	0	0.14	0	0.05	0.32	0.03	0	0
XLOC_004799	0.27	0.35	0.06	0.31	0.13	0.06	0.19	0.14	0.44	0.18	0.24	0.36	0.56	0.43	0.43	0.38	0.19	0.24	0.26	0.31	0.09	0.35	0.22	0.36	0.18	0.1	0.18	0.28	0.19	0.5	0.28	0.14	0.26	0.14	0.16	0.4	0.12	0.39	0.41	0.23	0.09	0.07	0.06	0.11	0.28	0.16	0.07	0.02	0.27
XLOC_004802	0	0	0	0	0	0	0	0.06	0	0	0	0	0	0	0	0	0	0	0	0	0	0	0	0	0	0	0	0	0	0.17	0	0	0	0	0	0	0	0	0	0	0.08	0	0	0	0	0	0	0	0
XLOC_004803	0.05	0	0	0.13	0	0	0	0	0.1	0	0	0.06	0.03	0.09	0	0.19	0.04	0	0	0.11	0.1	0.13	0	0.05	0	0.09	0.31	0.11	0.17	0	0	0	0.12	0.04	0.05	0.05	0	0.34	0.06	0.06	0	0	0	0.19	0.06	0.16	0	0.04	0
XLOC_004809	0	0.02	0.12	0.05	0.15	0.18	0.21	0.04	0.01	0.13	0.15	0.02	0.05	0.35	0.24	0.23	0.01	0.04	0.02	0	0.01	0.16	0.09	0	0.06	0.13	0.24	0.02	0.03	0.47	0.04	0.16	0.41	0.59	0.63	0.24	0.14	1.67	1.07	0.3	0.09	0.03	0.49	0.01	0	0.13	0.55	0.16	0
XLOC_004812	0.05	0.11	0.12	0.13	0.43	0.05	0	0	0	0	0.29	0	0.09	0.12	0.03	0.16	0	0.13	0	0	0.15	0.27	0.04	0.05	0	0	0.28	0	0	0	0	0	0.08	0.24	0	0	0.24	0	0	0	0.06	0.09	0.03	0	0.16	0.17	0.07	0.37	0
XLOC_004814	0	0.02	0.06	0.07	0	0.05	0	0	1.02	0.66	0.39	0.52	0.77	0.35	0.69	0.62	0.42	0.96	0.13	0.24	0.09	0.52	0.22	0.2	0.6	0.6	0.78	0.65	0.55	0.45	0.22	0.45	1.65	0.56	0.64	1.15	1.24	0.78	1.05	0.71	0.24	0.05	0	0.14	0	0	0	0.03	2.05
XLOC_004816	0	0	0	0	0	0.03	0.03	0	0.12	0.15	0.49	0.06	0.04	0.16	0.12	0.26	0.07	0	0	0	0.13	0.08	0.03	0	0	0	0	0.2	0.11	0.12	0.21	0.43	0.15	0.21	0.94	0.58	0.06	1.04	0.16	0.67	0	0.02	0	0.07	0	0	0.24	0.09	0.04
XLOC_004821	0	0.22	0.03	0	0.05	0.12	0	0.12	0.88	0.27	0.83	0.59	0.23	0.11	0.23	0.35	0.13	0.54	0.24	0	0.21	0.06	0.26	0.4	0.26	0.21	1	0.53	0.06	0.17	0.1	0.2	0.71	0.24	1.31	0.59	1.73	1.35	0.38	0.69	0.18	0.03	0.26	0	0.25	0.17	0.44	0.32	0.69
XLOC_004826	0	0	0	0	0	0	0	0	0	0	0	0	0	0	0	0	0	0.28	0	0	0	0	0	0	0	0	0.49	0	0	0	0	0.18	0.05	0	0	0	0	0	0	0	0	0	0	0	0	0	0	0	0
XLOC_004827	0.27	0.11	0.1	0.11	0.1	0.12	0.06	0.27	0.04	0.32	0.37	0.27	0.05	0.35	0.15	0.08	0.17	0	0.21	0.1	0.18	0.17	0.13	0.09	0	0.41	0	0	0	0.08	0.04	0.02	0	0.15	0.1	0	0	0.11	0.43	0.04	0.04	0.11	0.4	0.31	0.1	0	0.83	0.18	0.11
XLOC_004828	0	0	0	0	0	0	0	0	0	0	0	0	0.08	0	0	0	0.05	0	0	0	0.06	0	0	0	0.16	0.08	0	0	0	0	0	0	0	0	0	0	0	0	0	0	0.08	0	0	0	0	0	0	0	0
XLOC_004829	0	0	0	0	0	0	0	0.14	0.03	0	0	0	0	0	0	0.06	0.19	0	0	0	0	0	0	0	0	0.15	0	0	0	0	0	0	0	0.4	0	0	0	0	0	0.25	0	0	0	0	0	0	0	0	0
XLOC_004830	0.07	0.12	0.25	0.03	0.17	0	0.03	0	0.15	0.19	0.2	0.17	0	0.02	0.06	0.02	0.38	0.33	0.18	0.07	0.19	0	0.31	0.15	0.48	0.17	0.06	0.28	0.11	0.17	0.51	0.37	0.08	0.65	0.07	0.24	0.15	0.22	0.33	0.08	0.16	0.43	0.14	0.12	0.17	0.09	0.48	0.41	0.04
XLOC_004831	0.08	0.08	0.03	0.06	0	0	0.07	0	0.07	0.17	0	0	0.06	0.04	0.04	0.11	0.25	0.15	0.16	0.15	0.32	0.34	0	0.14	0.13	0.22	0.18	0.25	0.1	0.14	0.02	0.19	0.43	0.29	0	0.5	0.51	0.2	0.09	0.27	0.46	0.52	0.13	0.06	0.05	0.26	0.46	0.56	0
XLOC_004843	0	0	0	0	0	0	0	0	0.01	0	0.22	0	0	0	0	0	1.37	0.74	0.21	0.48	0.35	0.31	0.27	0.09	0.84	0.08	0.04	0.07	0.03	0.12	0.04	0	0.38	0.24	0.05	0.05	0	0	0	0	0.01	0	0.04	0	0	0	0	0	0.19
XLOC_004847	0.34	0.43	0.39	0.37	0.42	0.26	0.55	0.42	0.21	0.12	0.09	0.08	0.23	0.14	0.21	0.26	0.13	0.1	0.07	0.12	0.13	0.11	0.17	0.2	0.1	0.18	0.09	0.11	0.02	0.11	0.07	0.1	0.18	0.18	0.1	0.09	0.16	0.19	0.21	0.09	0.19	0.2	0.13	0.18	0.2	0.13	0.29	0.27	0.12
XLOC_004848	0.39	0.54	0.6	0.54	0.38	0.91	0.74	0.24	0.4	0.39	0.11	0.24	0.39	0.45	0.58	0.43	0.22	0.2	0.15	0.18	0.13	0.21	0.12	0.1	0.25	0.09	0.19	0.23	0.11	0.32	0.41	0.12	0.23	0.18	0.07	0.06	0.34	0.13	0.25	0	0.11	0.28	0.18	0.15	0.25	0.35	0.18	0.13	0.24
XLOC_004852	3.62	3.07	1.68	2.15	2.76	1.61	1.24	1.65	6.34	6.03	5.46	4.53	4.69	4.46	3.42	4.07	10.42	10.88	6.3	6.19	5.73	5.5	4.35	4.15	11.2	8.5	3.19	4.37	3.97	3.65	4.25	3.98	7.91	8.12	5.03	4.32	6.23	4.54	4.23	3.52	8.4	9.91	4.53	4.71	4.28	3.47	3.42	3.84	9.89
XLOC_004861	1.1	0.36	0.33	1.22	0.92	0.52	0.42	0.53	0.04	0.02	0.18	0.15	0.19	0.08	0.01	0.03	0.11	0.19	0.14	0.18	0.06	0.28	0.15	0.47	0.12	0.03	0.09	0.11	0.04	0.49	0.25	0.08	0.22	0.05	0.15	0.11	0.18	0.12	0.08	0.28	0.22	0.06	0.23	0.09	0.19	0.03	0.03	0.33	0.36
XLOC_004863	0	0	0.02	0	0.07	0	0	0	0.02	0	0.07	0	0.37	0.04	0.32	0.02	0.02	0.08	0	0.07	0	0	0	0	0	0	0.08	0.04	0	0	0	0	0.02	0.1	0	0	0	0	0	0	0	0	0	0	0	0	0	0	0
XLOC_004870	0.07	0.03	0.15	0.17	0.02	0.04	0	0	0.07	0.02	0.06	0.06	0.1	0.09	0.17	0.16	0.08	0.14	0.02	0.09	0.17	0.03	0.06	0.12	0.34	0.03	0.37	0.22	0.03	0.01	0.05	0.03	0.14	0.1	0.18	0.18	0.22	0.05	0.14	0.08	0.12	0.12	0.14	0.13	0.11	0.04	0.08	0.03	0
XLOC_004872	0.06	0.09	0.16	0.03	0	0.36	0	0	0.06	0.03	0.1	0	0.03	0.04	0.16	0.04	0.02	0	0	0.13	0.03	0.12	0.05	0	0.05	0.05	0	0	0.06	0.02	0	0.06	0.05	0	0.03	0	0	0.07	0	0	0	0	0.04	0.16	0.13	0.04	0.07	0.02	0.04
XLOC_004874	0	0	0	0	0	0.01	0	0.02	0	0.01	0.04	0	0	0	0	0.02	0.42	0.55	0.72	0.59	0.31	0.46	0.45	0.51	0.41	0.6	0.87	0.89	0.4	0.69	0.6	0.56	0.08	0.08	0.06	0.02	0	0.03	0.01	0.06	0.05	0.06	0.07	0.23	0.15	0.15	0.12	0.19	0.36
XLOC_004879	0.05	0	0	0.24	0.05	0.39	0	0.4	0.32	0	0.08	0.13	0.32	0.2	0.06	0.55	0	0.27	0.05	0.1	0.54	0.18	0.44	0.56	0.5	0	0	0.21	0.65	0.45	0	0.92	0.22	0	0	0.05	0.86	0.57	0.12	0.23	0.63	0	0	0.25	0.33	0.09	0	0.3	0.11
XLOC_004881	0	0	0	0.05	0	0	0	0	0	0	0.03	0	0	0	0	0	0.08	0.09	0.21	0	0.21	0	0.02	0.02	0.07	0.06	0	0.08	0.13	0	0	0	0.04	0	0	0.06	0	0	0	0	0.06	0.02	0.02	0.1	0.05	0.18	0	0	0.03
XLOC_004883	0	0	0	0	0	0	0	0	0.07	0.18	0.04	0.02	0.18	0.18	0.83	0.15	0.11	0	0.04	0	0	0	0.24	0.03	0	0.04	0.03	0	0	0.03	0.04	0	0.03	0	0.05	0	0.03	0.08	0.04	0	0	0.02	0.02	0.02	0	0	0.18	0.03	0
XLOC_004886	0.03	0.02	0.18	0.14	0.06	0.1	0.06	0.06	0.37	0.63	0.58	0.46	0.29	0.74	0.52	0.41	0.12	0.21	0.2	0.29	0.21	0.38	0.24	0.28	0.28	0.17	0.19	0.21	0.23	0.36	0.2	0.24	0.19	0.16	0.33	0.22	0.43	0.45	0.34	0.44	0.2	0.1	0.14	0.23	0.35	0.35	0.24	0.25	0.24
XLOC_004887	0	0.07	0	0	0	0	0	0	0	0.14	0.03	0.06	0.26	0	0.03	0	0.04	0	0	0	0	0	0	0.09	0	0	0	0	0	0	0	0	0	0	0.25	0.05	0.05	0	0.24	0	0	0	0	0	0.03	0	0.11	0.04	0
XLOC_004888	0	0	0	0	0	0	0	0.04	0.08	0	0	0	0	0	0.02	0.05	0	0	0.04	0	0.04	0.16	0	0.34	0	0	0	0	0.17	0.16	0.02	0.05	0	0	0	0	0	0	0	0.15	0	0	0	0	0	0.21	0.24	0.18	0
XLOC_004889	0	0.02	0	0	0	0	0	0	0.16	0.24	0.05	0.22	0.26	0.14	0.21	0.11	0.25	0.16	0.12	0.19	0.11	0.04	0.11	0.18	0.14	0.23	0.02	0.17	0.13	0.11	0.1	0.11	0.35	0.13	0.16	0.12	0.03	0.16	0.16	0.12	0.02	0.11	0.27	0.22	0.06	0	0.17	0.06	0.1
XLOC_004903	0	0.19	0	0	0.24	0.14	0	0.21	0	0.32	0.06	0.02	0.07	0.07	0.02	0.54	0.46	0	0	0.04	0	0	0	0.28	0	0.07	0	0	0	0.05	0	0.32	0	0.12	0	0	0	0	0.09	0.32	0.02	0.26	0	0	0.26	0.12	0.05	0.41	0
XLOC_004904	0.14	0.13	0.07	0	0	0.25	0	0.11	0.08	0.83	0.44	0.49	0.16	0.72	0.08	1.08	0.24	0.2	0.19	0	0.13	0.44	0.19	0.31	0.13	0.32	0.3	0.22	0	0.29	0.14	0.16	0.07	0.46	0.09	0.33	0.06	0.25	0	0.43	0.33	0.33	0.04	0.3	0.03	0.16	0.52	0.49	0.38
XLOC_004905	0	0	0	0	0.07	0	0	0	0.2	0.4	0.04	0.06	0.02	0.08	0.19	0.12	0.02	0.05	0	0.03	0	0	0.14	0.03	0.04	0	0.06	0	0	0	0	0	0	0	0	0.07	0.09	0	0.04	0	0	0.08	0	0	0	0	0	0	0.2
XLOC_004910	0.32	1.26	0.2	0.22	0.24	0.59	0.3	0.14	0.26	0.7	0.67	0.17	0.48	0.34	0.18	0.14	0.92	0.53	0.49	0.24	0.55	0.2	0.26	0.07	0.25	0.87	0.25	0.32	0.48	0.58	0.52	0.25	0.32	1.29	0.83	0.24	0.94	1.09	0.19	0	0.42	1.44	0.54	0.27	0.43	0.51	0.19	0.03	0.46
XLOC_004912	0.06	0.01	0.12	0.06	0.02	0.07	0.13	0.2	0	0	0	0	0	0.05	0	0	0.06	0	0.06	0.02	0.35	0.02	0.08	0.09	0.01	0.04	0.11	0	0.05	0.11	0.25	0.22	0	0.04	0.19	0	0	0	0	0	0.09	0.19	0.16	0.01	0.29	0.26	0.1	0.07	0.07
XLOC_004913	0.09	0.11	0.07	0	0.13	0.07	0.48	0.75	0	0	0.02	0	0.01	0	0	0	0.04	0.01	0.46	0.06	0.23	0.05	0.01	0.17	0.19	0.05	0.31	0	0.27	0.06	0.16	0.34	0	0.01	0	0	0	0	0	0	0.43	0.3	0.61	0.09	0.4	0.21	0.13	0.35	0
XLOC_004915	0	0	0.07	0	0	0	0	0	0.26	0.05	0.03	0.05	0.26	0	0.08	0.11	0.03	0.23	0.05	0.19	0.04	0.12	0.04	0.21	0	0	0.05	0.46	0	0.03	0	0.06	0.11	0.07	0.05	0	0.17	0.1	0	0.11	0.03	0.19	0	0	0.06	0.15	0	0	0.06
XLOC_004918	0	0	0	0	0	0	0	0	0	0	0.04	0	0	0.03	0	0.03	0.92	3.04	0.69	1.5	0.99	0.65	0.69	0.46	1.71	1.24	0.87	1.32	0.71	0.24	0.83	0.23	0.2	0.14	0	0	0	0.1	0	0	0.09	0.15	0	0	0.04	0	0	0	2.5
XLOC_004919	0	0.02	0	0	0.02	0	0	0	0.09	0	0.11	0	0.01	0.02	0.02	0	3.07	3.1	2.03	2.4	2.41	1.92	1.42	1.99	1.37	2.59	2.4	2.51	1.53	1.04	1.19	1.42	0.28	0.52	0.07	0	0.01	0.23	0.16	0	0.15	0.32	0.03	0.06	0.07	0.11	0.03	0.03	2.03
XLOC_004920	0.05	0.07	0.07	0.08	0.05	0.3	0.27	0.09	0	0	0	0.1	0.08	0.08	0.03	0.11	0.04	0	0	0.24	0.04	0	0.24	0.08	0	0	0	0.05	0	0.03	0.48	0.37	0	0.04	0	0	0	0	0	0	0.08	0	0	0	0.32	0.06	0	0.07	0.06
XLOC_004923	0.12	0.06	0.06	0.16	0.56	0.04	0.11	0	0	0	0.23	0.35	0.11	0.18	0.2	0.12	0.29	0.09	0.12	0.08	0	0	0.07	0	0.32	0.49	0	0.19	0	0.15	0.77	0.1	0.12	0.58	0.42	0.12	0	0.08	0	0.28	0.43	0.13	0.28	0.54	0.32	0.05	0.19	0.19	0.23
XLOC_004924	0	0	0	0.01	0	0.01	0	0	0.11	0	0.05	0.03	0.02	0.07	0.02	0.05	1.08	1.34	0.48	0.5	0.27	0.55	0.32	0.47	1.39	0.88	0.46	0.31	0.17	0.46	0.28	0.54	1.7	0.53	0.16	0.13	0	0.14	0.09	0.01	3.13	1.62	1.25	0.97	0.57	1.78	0.67	0.84	1.49
XLOC_004925	0	0	0	0	0	0	0	0	0.21	0.09	0.22	0	0.09	0.08	0.03	0.04	4.09	2.97	2.76	1.68	2.12	2.3	1.18	0.94	2.5	3.9	1.88	1	1.9	1.43	1.26	1.72	1.94	2.16	0.86	0.2	0.06	0.45	0.09	0.04	3.92	5.52	3.32	2.2	3.26	1.81	1.68	1.93	3.32
XLOC_004926	0.04	0	0	0	0	0	0	0.01	0.21	0.04	0.55	0.04	0.18	0.14	0.04	0.02	5.95	2.11	2.31	2.56	2.07	2.16	1.3	1.12	4.11	4.9	1.83	1.97	1.32	1.51	0.98	1.6	4.03	4	0.95	0.36	0.02	0.54	0.46	0.03	5.24	8.49	3.99	4.1	4.98	3.13	3.23	2.66	2.6
XLOC_004929	0.11	0.03	0.03	0.1	0.04	0.35	0.06	0.08	0.25	0.04	0	0.03	0.02	0.11	0.02	0.02	0	0.21	0.02	0.02	0.06	0.15	0.07	0.04	0.13	0.08	0	0	0.12	0.09	0	0.03	0.26	0.05	0.02	0	0.04	0.35	0	0.05	0.06	0.02	0	0.09	0	0.1	0.01	0	0.05
XLOC_004931	0.05	0.05	0.08	0.11	0	0	0.09	0.06	0.03	0.07	0	0.09	0.05	0.11	0.08	0.01	0.38	0.05	0.07	0.05	0.11	0.03	0.02	0.08	0.12	0.19	0.09	0.09	0.01	0.22	0	0.04	0.02	0.1	0.09	0.05	0.12	0.05	0.05	0.11	0.03	0.04	0	0.09	0	0	0.32	0.16	0.05
XLOC_004933	0.47	0.53	0.29	0.17	0.34	0.22	0.22	0.16	0.35	0.42	0.58	0.09	0.45	0.28	0.16	0.07	0.72	0.76	0.78	0.36	0.93	0.4	0.81	0.35	1.06	0.66	0.48	0.33	0.97	0.56	0.64	0.57	0.77	0.82	0.48	0.28	0.61	0.39	0.38	0.1	1.01	1.09	0.81	0.48	1.1	0.65	0.81	0.48	0.79
XLOC_004936	0.04	0.06	0.09	0.07	0.16	0.11	0.27	0.15	0	0	0	0	0	0	0	0	0.03	0.06	0.04	0.12	0.19	0.05	0.07	0.11	0	0.21	0.05	0.07	0	0.05	0.38	0.05	0	0	0	0	0.18	0.09	0.05	0	0.05	0.05	0.14	0	0.25	0.1	0	0.08	0
XLOC_004937	0.16	0.03	0.06	0.19	0.06	0.09	0	0.09	0.28	0.03	0.12	0.13	0.49	0.34	0.08	0.35	0.17	0.17	0.47	0.1	0.24	0.12	0.05	0.29	0.11	0.1	0.7	0.21	0.05	0.41	0	0.16	0.45	0.31	0.49	0.24	0.21	0.29	0.02	0.16	0.19	0.15	0.53	0.14	0.43	0.73	0.36	0.6	0.39
XLOC_004942	0.12	0	0	0	0	0	0	0	0	0	0.46	0.03	0.03	0	0	0.07	0	0	0	0.06	0.11	0	0	0	0	0	0.1	0	0	0.04	0.06	0.8	0.3	0.26	0.66	0.63	0.41	0.06	0.14	0.13	0	0	0.13	0	0.03	0	0.24	0.28	0.07
XLOC_004944	0	0	0	0	0	0	0	0	0	0	0	0	0	0	0	0	0	0.13	0	0	0	0	0	0	0	0	0	0	0	0	0	0	0	0	0	0	0	0	0	0	0.32	0.13	0	0	0	0	0.2	0.31	0
XLOC_004946	0.03	0.01	0.1	0	0	0	0.09	0	0.17	0.04	0.11	0.08	0.15	0.17	0.34	0.19	0.07	0	0.03	0.02	0.09	0.1	0.08	0.13	0.02	0	0.16	0.03	0.16	0.11	0.04	0.22	0.18	0.25	0.14	0.23	0.12	0.24	0.35	0.4	0	0.04	0.09	0.02	0.08	0.16	0.05	0	0.04
XLOC_004947	0.13	0.09	0.1	0.13	0.09	0	0.14	0.14	0.21	0.3	0.56	0.32	0.36	0.25	0.83	0.66	0.07	0.04	0.15	0.08	0.22	0.23	0.16	0.41	0.18	0.03	0.3	0.15	0.21	0.38	0.24	0.4	0.4	0.43	0.94	0.9	0.77	0.58	0.64	1.51	0.05	0	0.06	0.29	0.21	0.21	0.22	0.41	0.07
XLOC_004948	0.06	0.06	0.14	0	0	0	0	0.04	0.01	0.09	0.09	0.16	0.02	0.17	0.3	0.13	0.02	0.07	0	0.08	0.02	0.1	0.02	0.04	0.12	0	0.07	0	0.2	0.01	0.24	0.08	0.03	0.06	0.61	0.19	0.13	0.31	0.22	0.48	0.01	0.05	0.07	0.03	0.04	0.15	0.09	0.13	0.05
XLOC_004952	0.07	0.24	0.15	0.17	0.07	0.12	0.13	0.09	0.04	0.15	0.06	0.26	0.23	0.04	0.04	0.06	0	0.03	0.04	0	0	0.09	0.11	0.03	0	0	0	0.02	0.11	0	0	0.2	0.2	0	0	0	0.15	0	0.08	0.32	0	0	0	0	0.02	0	0	0	0
XLOC_004953	0.1	0.3	0.17	0.16	0.3	0.06	0.22	0.12	0.08	0	0.07	0.05	0	0.06	0	0	0.1	0.26	0.58	0.13	0.55	0.29	0.46	0.32	0.19	0	0.62	0.25	0.32	0.1	0	0.08	0	0	0.06	0	0	0.03	0.12	0	0.17	0.04	0.36	0.05	0.22	0.18	0	0.21	0.27
XLOC_004955	0.14	0.43	0.15	0.39	0.07	0.24	0.13	0.06	0.17	0.26	0.33	0.07	0.42	0	0.16	0.2	0	0.11	0.21	0.07	0	0.09	0.11	0.06	0	0	0.04	0	0.61	0	0	0.04	0	0.1	0	0	0	0	0	0.16	0	0.08	0.2	0.39	0.29	0	0.38	0.67	0
XLOC_004958	0	0	0	0	0	0	0	0	0	0.04	0	0	0	0	0	0	0	0.02	0.02	0.07	0.04	0.2	0.11	0.1	0.01	0.04	0.01	0.05	0.03	0	0	0.16	0	0	0	0	0	0.07	0	0	0.01	0.06	0.49	0.35	0.31	0.2	0.06	0.24	0.08
XLOC_004959	0.28	0.14	0.33	0.25	0.41	0.16	0.21	0.32	0.11	0.11	0.15	0.14	0.27	0.35	0.17	0.16	0.26	0.19	0.15	0.22	0.34	0.09	0.15	0.29	0.2	0.17	0.18	0.15	0.06	0.27	0	0.15	0.23	0.13	0.11	0.48	0	0.1	0.02	0.28	0.12	0.39	0.12	0.48	0.13	0.28	0.06	0.52	0.4
XLOC_004960	0	0.06	0.08	0.15	0.03	0.02	0.08	0.05	0.28	0.29	0.13	0.16	0.3	0.23	0.15	0.29	0.32	0.3	0.03	0.22	0.05	0.37	0.42	0.31	0.25	0	0.22	0.03	0	0.35	0	0.1	0.34	0.16	0.16	0.19	0.07	0.34	0.06	0.37	0.05	0.17	0.08	0.08	0.07	0.33	0	0.02	0.31
XLOC_004964	0	0	0.11	0	0	0	0	0	0.06	0	0.04	0	0.01	0.06	0	0	0	0.29	0.02	0.02	0.04	0	0	0	0.13	0.12	0	0	0	0	0	0	0.26	0.08	0	0	0	0	0	0	0.48	0.22	0	0	0	0	0	0	0.36
XLOC_004966	0.31	0.04	0	0.1	0.12	0.16	0	0.16	0.04	0.03	0.03	0.23	0.3	0.42	0	0	0.44	0.33	0.62	0.3	0.17	0.3	0.1	0.26	0.14	0.17	0.1	0.61	0.04	0.48	0.17	0	0.31	0.18	0.4	0	0.16	0.13	0.07	0.49	0.41	0.54	0.38	0.37	0.07	0.48	0.38	0.84	0
XLOC_004967	0	0	0	0	0	0	0	0	0	0	0	0	0	0	0	0	0	0.05	0	0.13	0	0	0	0	0	0	0	0.71	0	0	0	0	0	0	0	0	0	0	0	0	0.11	0	0	0	0	0	0	0	0
XLOC_004968	0.1	0.24	0	0.44	0.3	0.09	0.19	0	0	0.03	0.03	0	0	0	0.03	0	0	0	0.05	0.34	0.27	0	0.48	0	0	0	0	0.55	0	0	0.05	0	0	0.15	0	0.3	0	0	0	0	0	0.06	0	0.28	0.12	0	0.96	0	0
XLOC_004970	0	0.06	0.06	0	0.34	0.41	0.12	0.27	0.33	0.14	0.18	0.02	0.33	0	0.19	0.33	0.75	0.4	0.62	0.3	0.63	0.26	0.42	0.6	0.2	0.69	0.15	0.45	0.57	0.62	0.42	0.21	0.35	0.61	0.24	0.34	0	0.14	0	0.34	0.31	0.52	0.12	0.55	0.75	0.26	0.65	1.03	0.25
XLOC_004973	0	0	0	0	0	0	0	0	0.07	0.03	0.1	0	0.01	0	0.22	0.1	0.23	0	0	0.19	0	0	0	0.02	0.03	0	0.07	0	0	0	0	0	0	0	0.02	0	0.15	0	0.09	0.48	0	0	0	0	0	0	0	0	0.03
XLOC_004977	1.45	1.42	0.56	0.95	0.99	1.83	1	0.7	0.81	0.57	0.44	0.48	1.1	2	1.46	0.81	0.63	0.67	0.31	0.55	0.48	0.61	0.59	0.32	0.62	0.58	0.46	0.4	0.44	0.71	0.26	0.35	1.02	0.75	0.41	0.54	0.37	1.06	1.12	0.23	0.75	0.63	0.31	0.57	0.44	0.87	0.68	0.32	0.74
XLOC_004978	0	0	0	0	0	0.04	0	0	0	0	0	0	0	0.26	0	0	0	0	0	0	0	0	0	0	0	0	0	0	0	0.06	0	0	0	0	0	0	0	0.33	0	0	0	0	0	0	0	0.03	0	0	0
XLOC_004979	0.01	0.1	0	0.03	0.05	0.02	0	0.01	0.08	0.01	0.1	0.02	0.01	0	0	0	0.23	0.18	0.11	0.23	0.28	0.22	0.29	0.21	0.24	0.17	0.27	0.09	0.19	0.17	0.14	0.07	0.27	0.27	0.04	0.03	0.05	0.09	0.02	0.04	0.05	0.01	0.06	0.03	0	0.03	0.01	0	0.18
XLOC_004980	0	0	0	0.03	0.04	0	0	0.27	0.02	0.04	0	0.1	0.02	0.09	0.04	0.07	0	0.12	0	0	0.1	0.05	0	0	0.02	0	0	0	0.02	0	0.06	0	0	0.03	0	0	0.36	0	0.04	0.38	0	0.02	0	0	0	0	0	0.03	0.09
XLOC_004981	0	0	0	0.09	0.06	0	0	0	0.49	0.13	0	0.03	0	0	0	0	0	0	0	0	0	0	0	0	0	0	0.03	0	0	0	0	0	0	0	0	0.06	0	0	0	0	0	0	0	0	0.11	0	0	0.08	0
XLOC_004982	0.07	0.25	0	0.06	0	0.51	0	0	0.09	0	0.04	0	0.04	0	0.16	0	0.21	0.45	0	0.07	0.07	0	0	0	1.24	0.08	0	0.08	0.05	0	0	0	0	0.16	0	0	0.06	0.3	0.17	0.08	0.73	0.08	0	0.04	0	0	0.1	0	0.25
XLOC_004983	0.44	0.18	0.04	0.1	0.06	0.04	0.23	0.07	0.07	0.01	0.02	0	0.02	0	0.02	0	0.01	0.27	0	0	0.15	0.13	0.2	0.12	0.28	0.01	0.02	0.02	0.18	0	0	0.06	0.03	0.11	0	0.04	0.07	0.13	0	0.09	0.15	0	0	0	0.02	0	0.11	0	0.09
XLOC_004984	0.04	0.09	0.1	0.06	0	0.07	0.02	0.03	0.32	0.55	0.35	0.38	0.45	0.47	0.11	0.09	0.19	0.12	0.23	0.11	0.09	0.23	0.12	0.1	0.18	0.24	0.05	0.29	0.07	0.22	0.08	0.07	0.15	0.29	0.18	0.13	0.32	0	0.09	0.28	0.07	0.07	0.02	0.03	0.07	0.06	0.08	0	0.17
XLOC_004985	0.6	1.11	0.45	0.53	0.87	0.43	0.32	0.16	0.45	0.64	0.21	0.4	0.8	0.33	0.17	0.04	0.51	0.36	0.2	0.66	0.88	0.47	0.18	0.06	0.29	0.56	0.38	0.65	0.43	0.54	0.18	0.21	0.32	0.89	0.62	0.54	0.98	0.53	0.14	0.14	0.55	0.72	0.38	0.55	0.82	0.5	0.35	0.11	0.41
XLOC_004986	0	0.41	0	0	0	0	0	0	0	0	0.11	0	0	0	0	0	0	0	0	0	0	0	0	0	0	0	0	0	0	0	0	0	0.04	0	0.05	0	0	0	0	0	0	0	0	0.1	0	0	0	0	0
XLOC_004987	0.07	0.63	0.15	0.36	0.1	0.24	1.14	0.61	0	0	0.04	0	0	0.04	0.02	0	0	0	0	0	0	0	0	0	0	0.23	0	0.07	0	0	0	0	0	0.15	0.06	0.44	0	0	0	0	0	0	0.04	0	0	0	0	0	0
XLOC_004988	0.08	0.05	0.06	0.14	0.04	0.07	0.06	0.11	0.03	0.08	0.13	0.07	0.07	0.15	0.36	0.21	0.06	0.14	0.08	0.05	0.12	0.03	0.07	0.09	0	0.26	0.28	0.07	0.06	0.06	0.08	0.08	0.25	0.29	0.32	0.38	0.09	0.12	0.21	0.19	0.04	0.01	0.12	0.19	0.03	0.05	0.28	0.13	0.12
XLOC_004989	0.26	0.3	0.28	0.36	0.26	0.2	0.21	0.29	0.13	0.26	0.11	0.36	0.18	0.11	0.09	0.06	0.14	0.12	0.14	0.22	0.13	0.09	0.06	0.11	0.1	0.33	0.16	0.25	0.12	0.08	0.13	0.05	0.12	0.18	0.15	0.93	0.05	0.02	0.03	0.09	0.16	0.29	0.05	0.28	0.11	0.1	0.13	0.02	0.13
XLOC_004993	0	0	0	0	0	0	0	0	0	0	0.17	0	0	0	0	0.01	0	0.13	0	0.05	0.05	0	0	0.04	0.1	0	0	0	0	0	0	0.06	0	0	0	0	0	0	0	0	0.07	0.03	0	0.04	0	0	0.08	0	0.08
XLOC_004994	0	0	0	0.01	0	0	0	0	0.12	0.03	0.28	0.01	0.02	0.01	0.01	0.02	0.34	0.26	0.38	0.23	0.24	0.34	0.21	0.22	0.24	0.21	0.25	0.07	0.13	0.24	0.15	0.2	0.41	0.28	0.34	0.14	0.03	0.16	0.04	0.06	0.32	0.56	0.41	0.46	0.18	0.29	0.45	0.46	0.28
XLOC_004995	0.12	0	0	0.03	0.12	0.1	0	0.07	0	0	0	0	0.02	0	0.04	0	0.03	0	0	0.15	0	0	0	0	0	0	0	0.06	0	0	0	0	0	0	0	0.31	0	0	0	0	0	0	0	0.3	0	0	0	0.03	0
XLOC_004998	0	0.1	0.16	0.01	0	0.15	0.04	0.49	0.02	0.3	0.73	0.28	0.03	0.3	0.19	0.98	0.08	0	0.25	0.09	0.04	0.22	0.17	0.65	0.02	0.12	0.32	0.06	0.08	0.35	0.19	0.26	0	0.37	0.5	0.11	0.04	0.51	0.24	1.57	0	0.08	0.44	0.21	0.09	0.15	0.25	0.57	0.03
XLOC_004999	0.08	0.06	0.06	0.23	0.16	0	0.12	0.04	0.12	0.09	0	0	0.05	0	0	0	0.06	0.36	0.21	0.16	0.15	0.05	0.13	0.04	0	0.02	0.02	0.52	0.16	0.07	0.13	0.03	0.03	0.06	0.08	0	0.14	0.09	0	0	0.02	0.28	0.12	0.23	0.15	0	0.11	0.26	0.14
XLOC_005001	0	0	0	0	0	0	0	0	0.01	0	0.04	0	0	0	0	0	0.27	0.4	0.05	0.11	0.04	0.05	0.14	0.1	0.23	0.04	0	0	0	0	0	0	0.02	0	0	0	0.04	0.05	0	0	0.02	0.01	0	0	0	0.08	0	0	0.23
XLOC_005003	0	0	0.08	0	0	0.09	0.02	0.07	0	0	0.05	0.17	0.07	0.19	0.05	0.08	0	0.05	0.04	0	0.06	0	0	0	0	0	0.08	0	0.17	0.09	0	0	0.12	0	0.04	0.27	0.07	0	0	0	0	0	0.15	0.02	0	0.28	0.04	0.06	0.02
XLOC_005006	0	0	0	0	0	0	0	0	0	0	0.03	0.01	0	0	0	0	0.22	0.01	0.52	0.15	0.18	0.97	0.15	0.69	0.05	0.24	0.63	0.12	0.12	0.89	0.09	0.47	0.01	0.08	0.05	0	0	0.2	0.02	0.01	0.02	0.29	0.29	0.11	0.15	0.52	0.15	0.52	0.03
XLOC_005008	0.05	0.11	0.05	0.1	0.07	0.07	0.03	0.02	0.06	0.16	0.18	0.09	0.03	0.01	0.06	0.14	0.03	0.05	0.1	0.02	0.02	0.03	0.05	0.02	0.05	0.15	0.15	0.01	0.15	0.08	0.19	0.15	0.62	0.38	0.88	0.55	0.22	0.81	0.6	0.5	0.08	0.04	0.08	0.2	0	0	0.27	0.13	0
XLOC_005009	0.56	0.08	0.19	0	0.11	0.32	0.21	0.3	0.28	0	0.02	0	0.12	0.38	0.16	0.17	0.05	0.09	0	0	0	0.09	0.09	0	0.08	0	0.19	0.06	0	0.02	0.02	0.02	0.22	0.06	0	0.22	0.06	0.27	0.13	0.04	0	0.02	0.08	0.04	0.15	0.16	0.1	0	0.04
XLOC_005015	0	0	0	0	0	0	0	0	0.02	0	0	0.03	0.1	0.03	0	0	0.04	0.3	0.06	0.06	0.3	0	0.12	0.21	0.02	0.02	0.05	0.02	0	0.02	0	0	0	0.09	0	0	0	0	0.07	0	0.18	0.03	0	0.02	0	0.04	0	0	0.03
XLOC_005016	0.07	0.31	1.15	0.11	0.06	0.12	0.08	0.01	0.53	0.5	0.81	0.45	0.28	0.6	0.55	0.2	3.55	4.46	4.56	3.16	2.84	2.3	2.73	1.46	3.27	1.98	1.71	1.96	1.69	1.37	1.61	0.89	1.92	2.07	0.85	0.34	0.09	0.67	0.46	0.15	4.32	3.69	2.11	1.55	2.14	1.68	1.94	0.65	3.41
XLOC_005021	0.59	0.42	0.2	0.82	1.41	0.19	0.34	0.35	0.25	0.27	0.24	1.62	0.95	0.15	0.15	0.11	0.12	0.04	0.13	1.66	1.23	0.09	0.12	0.02	0.25	0.03	0.11	2.01	1.62	0.03	0.25	0.39	0.32	0.11	0.42	1.45	1	0.05	0.23	0.17	0.14	0.08	0.11	1.45	1.32	0.06	0.2	0.18	0.08
XLOC_005030	0.09	0.1	0.14	0.17	0.15	0.11	0.08	0.22	0	0	0.12	0	0.07	0.14	0.04	0.09	0.08	0.03	0.11	0.02	0.1	0.05	0.11	0	0.07	0.01	0.02	0.06	0.14	0.17	0.12	0.23	0.16	0.02	0	0.04	0.1	0.3	0.1	0	0.01	0.06	0.36	0.13	0.04	0.09	0.12	0.2	0
XLOC_005034	0.11	0.13	0.02	0.11	0	0.07	0.17	0.53	0	0.04	0.01	0.01	0.01	0.09	0.07	0.02	0.06	0	0	0.13	0.1	0.07	0.02	0.05	0.02	0	0	0	0.07	0	0.03	0.12	0	0.06	0	0	0	0	0.06	0.12	0	0.06	0.02	0	0	0.05	0	0	0.06
XLOC_005036	0.43	0.13	0.27	0.92	0.67	0.32	0.85	0.49	0	0	0	0.13	0	0.07	0.1	0	0	0.05	0	0	0.06	0	0	0	0	0	0	0	0	0.15	0	0	0	0.05	0	0	0.05	0	0.21	0	0	0	0.07	0.03	0.04	0	0.04	0	0.14
XLOC_005039	0.06	0.09	0.19	0.05	0.25	0	0.06	0	0.11	0.24	0.13	0.51	0.21	0.15	0.11	0.11	0	0.05	0	0.25	0.06	0	0	0	0.14	0	0.11	0.1	0.04	0.12	0	0	0	0.1	0.06	0.95	0.67	0.13	0.37	0.51	0.11	0.04	0	0	0.19	0	0	0.13	0.07
XLOC_005051	0.1	0.61	0.22	0.63	0.59	0.22	0.6	0.62	0.06	0.03	0	0	0	0	0.11	0.03	0.07	0.04	0	0	0	0	0.04	0	0.06	0	0.06	0.13	0	0	0	0	0	0	0	0.2	0	0	0.12	0	0	0.05	0.03	0.05	0	0	0.07	0.03	0
XLOC_005054	0	0.23	0.25	0	0.07	0.24	0.13	0.12	0.04	0.33	0	0	0	0.19	0.08	0	0.05	0	0	0	0	0	0	0	0	0.15	0	0	0	0.04	0	0.21	0	0.1	0	0	0	0	0.08	0.08	0	0.15	0	0.1	0.04	0	0	0	0
XLOC_005058	0.43	0.15	0	0	0.14	0.06	0.07	0.64	0.34	0.15	0	0	0	0.2	0.12	0.38	0	0	0	0	0	0	0	0	0	0	0	0	0	0	0	0	0.05	0.21	0	0	0.06	0.15	0	0.24	0	0.12	0	0	0	0.17	0	0	0
XLOC_005059	0.03	0.48	0.1	0	0.03	0.2	0.16	0.06	0.02	0.09	0.18	0.16	0.13	0.08	0.07	0	0.05	0.08	0.1	0.13	0.06	0.04	0.05	0	0	0.37	0.02	0	0.21	0.18	0.15	0.04	0.22	0.08	0.16	0.23	0.15	0.11	0	0.04	0.13	0	0	0.14	0	0.22	0.21	0.18	0.04
XLOC_005066	0.08	0.18	0.22	0.57	0.07	0.07	0.38	0.37	0.09	0.26	0.02	0.06	0.08	0.02	0.29	0.02	0	0.09	0.23	0	0.31	0.14	0.03	0.16	0.17	0.02	0	0.2	0	0.05	0.14	0.02	0	0.14	0.18	0	0.16	0.04	0.13	0.17	0.29	0.17	0	0.04	0.04	0	0.1	0.18	0
XLOC_005068	0.42	1.14	1.75	1.49	1.92	2.16	2.74	1.88	0.26	0.23	1.29	0.67	0.46	0.74	0.75	0.44	0.23	0.2	1.15	0.58	0.68	1.23	1.06	1.11	0.39	0.37	0.85	1.08	0.9	1.45	2.45	1.57	0.16	0.41	0.98	0.34	1.64	1.25	1.6	1.29	0.23	0.26	0.71	0.75	0.75	1.08	0.82	0.64	0.32
XLOC_005075	0.08	0.07	0.15	0.4	0.4	0.22	0.09	0.2	0.06	0.37	0.16	0.13	0.37	0.29	0.31	0.06	0.15	0.08	0.15	0.27	0.05	0.09	0.04	0.26	0.1	0	0.27	0.17	0.36	0.24	0.04	0.03	0.07	0.34	0.1	0.07	0.11	0.37	0.47	0.09	0.13	0.24	0.27	0.23	0.51	0.06	0.17	0.17	0.14
XLOC_005077	0	0.12	0.18	0	0.06	0	0	0.05	0.21	0.19	0.66	0.39	1.09	0.45	0.2	0.35	0.13	0.19	0.12	0.06	0.83	0.37	0	0.78	0.31	0	0.07	0.35	0.34	0.36	0	0.97	0.18	0.18	0.34	0	0.37	0	0.07	0.89	0	0.13	0.31	0.31	0.18	0.4	0	0.25	0.07
XLOC_005079	0.43	0.13	1.01	1.77	0.74	0.65	0.98	0.74	0	0.07	0	0.04	0.03	0	0.01	0.01	0.01	0	0.05	0.03	0.06	0.04	0	0	0.02	0	0.02	0.07	0	0.08	0	0.03	0.02	0.02	0.02	0	0	0	0.15	0.04	0	0	0.06	0	0.01	0	0	0.01	0.13
XLOC_005083	0.24	0.32	0.13	0.41	0.46	0.66	0.62	0.95	0.15	0.49	0.07	0.28	0.11	0.12	0.14	0.61	0.17	0.16	0.24	0.18	0.21	0.16	0.1	0.34	0.1	0.34	0.06	0.1	0.05	0.42	0.25	0.34	0.04	0.14	0.05	0.36	0	0.16	0.52	0.06	0.07	0.21	0.12	0.05	0.06	0.22	0.32	0.11	0.53
XLOC_005084	0.64	0.87	0.43	0.84	0.42	0.59	0.63	0.68	0	0.04	0.13	0.09	0.09	0.1	0.21	0.02	0.12	0.07	0.13	0.17	0	0	0.07	0.04	0.05	0.23	0.14	0.49	0	0	0.16	0	0.31	0	0	0.21	0.22	0.22	0	0.1	0.47	0.21	0.19	0.09	0.08	0.13	0.17	0.06	0.29
XLOC_005087	0.15	0.1	0.18	0.3	0.4	0.4	0.49	0.54	0.01	0.05	0.01	0.04	0.21	0.19	0.11	0.06	0	0	0	0.1	0.07	0	0.1	0.07	0	0.03	0.1	0	0.08	0.11	0.18	0.14	0	0	0.05	0.15	0.04	0.21	0	0.17	0	0.1	0.09	0.01	0	0.18	0.03	0.19	0.11
XLOC_005092	0	0	0	0	0	0	0	0	0	0	0	0	0	0	0	0	0	0.02	0	0	0	0	0	0.05	0	0	0	0	0	0	0	0	0	0	0	0	0	0	0	0	0	0.02	0	0.49	0	0	0	0	0.04
XLOC_005093	0	0	0	0	0	0	0	0	0	0	0	0.04	0	0	0	0	0	0	0	0	0.22	0	0.06	0	0.04	0	0	0	0	0	0	0.05	0	0	0	0	0	0	0	0	0.13	0	0.36	0.72	0	0	0	0.16	0
XLOC_005094	0	0	0	0	0	0	0	0	0	0	0	0	0	0	0	0	0	0	0	0	0	0	0.05	0	0	0	0	0	0	0	0	0	0	0	0	0	0	0	0	0	0	0.55	0.08	0.03	0.48	0.08	0.18	0	0
XLOC_005096	0	0.09	0.36	0.03	0	0	0.09	0.18	3.13	4.17	5.37	6	5.33	7.31	4.16	4.48	0.24	0.54	0.1	0.13	0.09	0	0.11	0.17	0	0.11	0.09	0.14	0.04	0.1	0.04	0.06	0.17	0.44	1.24	1.75	1.51	1.95	3.38	1.98	0.18	0.15	0.28	0.03	0.14	0.08	0.18	0.07	0.22
XLOC_005099	0	0	0	0	0	0	0	0	0.05	0	0.04	0	0	0	0	0	0	0.06	0.08	0	0	0	0.13	0.13	0	0	0	0.04	0	0	0.3	0	0	0	0	0	0.07	0	0	0	0	0.35	0	0	0.33	0.47	0	0.05	0.09
XLOC_005101	0.03	0.02	0.04	0.02	0	0.19	0	0.04	0.01	0	0.05	0.01	0.04	0.24	0.02	0.05	0.05	0.06	0.09	0	0	0.13	0	0.13	0.02	0	0.06	0	0	0.18	0.02	0	0.08	0.04	0.14	0.09	0	0.18	0.05	0	0.14	0	0.02	0	0.01	0.05	0	0	0.03
XLOC_005110	0.36	0.62	0.22	0.7	0.35	0.68	0.19	0.25	0.36	0.01	0.07	0.11	0.14	0.13	0.35	0.49	0.49	0.47	0.18	0.47	0.23	0.43	0.65	0.37	0.57	0.1	0.4	0.32	0.27	0.41	0.16	0.47	0.39	0.41	0.31	0.15	0.66	0.39	0.44	0.75	0.21	0.1	0.23	0.28	0.29	0.18	0.16	0.34	0.98
XLOC_005122	0.36	1.18	0.35	0.66	0	0.31	0.44	0.48	0.04	0.03	0.16	0.13	0.26	0.41	0.07	0	0.43	0.32	0.06	0.06	0.33	0.22	0.38	0.15	0.2	0	0.54	0.37	0	0.07	0	1.07	0.3	0.31	0.17	0.06	0.15	0.43	0.56	0.07	0.36	1.18	0.57	0.48	0.04	0.14	0.24	0.2	0.27
XLOC_005124	2.05	1.74	2.01	1.34	1.73	1.69	1	1.87	0.39	0.42	0.25	0.37	0.31	0.11	0.25	0.2	0.57	0.15	0.29	0.53	0.38	0.43	0.76	0.91	0.14	0.11	0.43	0.38	0.62	0.19	0.05	0.37	0.12	0.05	0.3	0.06	0.17	0.86	0	0.11	0.35	0.23	0.31	0.27	0.44	0.29	0.65	0.65	0.36
XLOC_005128	0.07	0.12	0.04	0.02	0	0	0.22	0	0.3	0.26	0.17	0.1	0.02	0	0.24	0.03	0.44	0.31	0.17	0.06	0.04	0.03	0.4	0	0.53	0.3	0.06	0.03	0.04	0.07	0.64	0.01	0.16	0.27	0.2	0.04	0.02	0	0.35	0	0.21	0.25	0.23	0.03	0.01	0.04	0.28	0.08	0.37
XLOC_005143	0	0	0.03	0	0.08	0	0	0.04	0.05	0	0	0	0.02	0.25	0	0.02	0	0	0.04	0	0.26	0.1	0	0	0	0	0	0	0	0.02	0	0.22	0.03	0.06	0.08	0	0.21	0	0	0	0	0	0	0	0	0	0	0	0.14
XLOC_005147	1.01	0.84	1.17	1.04	1.15	1.41	0.79	1.27	0.55	0.41	0.67	0.18	0.52	0.37	0.19	0.34	0.11	0.18	0.83	0.49	0.21	0.28	0.99	0.53	0.2	0.06	0.2	0.34	0.36	0.83	0.4	0.52	0.39	0.35	1.02	0.3	0.7	0.32	0.68	0.31	0.11	0	0.72	0.16	0.25	0.23	0.47	0.47	0.04
XLOC_005150	0.57	0.42	0.62	0.45	0.56	0.49	0.26	0.76	0.23	0.3	0	0.09	0.25	0.29	0.13	0.23	0.08	0.26	0.29	0.28	0.05	0.76	0.32	0.1	0	0	0.06	0.12	0.11	0.1	0.03	0.07	0.29	0.34	0.05	0.06	0.05	0.24	0.13	0.06	0.13	0.09	0.58	0.49	0.44	0.17	0.5	0.08	0.19
XLOC_005155	1.2	1.03	0.73	1	1.99	1.42	1.98	1.23	0.22	0.37	0.2	0.1	0.24	0.5	0.31	0.33	0.18	0.44	0.06	0.25	0.46	0.15	0.45	0.22	0.89	0.52	0.53	0.43	0.08	0.3	0	0.43	0.69	0.42	0.71	0.19	0.27	0.98	0.07	0.07	0.7	0.42	0.46	1.24	0.26	0.19	0.3	0.94	0.36
XLOC_005160	0	0.07	0	0	0	0	0	0	0	0	0.04	0	0	0.02	0	0	0	0	0.04	0	0	0.22	0.09	0.06	0	0	0.23	0.04	0	0	0	0	0	0	0	0	0	0	0	0.04	0	0.04	0	0.11	0	0	0	0	0
XLOC_005165	0.29	0.62	0.79	0.91	0.28	0.87	0.22	0.42	0.37	0.33	0.22	0.46	0.13	0.43	0.24	0.22	0.03	0.07	0.05	0.14	0.09	0.58	0.04	0.25	0.08	0	0.05	0.15	0.09	0	0	0.21	0.49	0.32	0.49	0.56	0.45	1.79	0.45	1.19	0.82	0.47	0.22	0.36	0.03	0.17	0.2	0.85	0
XLOC_005167	0	0	0.18	0.12	0.18	0.18	0.08	0.11	0	0.03	0.14	0.06	0.07	0.05	0.03	0.02	0.2	0.38	0.03	0.12	0.17	0.07	0	0.03	0.41	0.55	0.14	0.06	0.08	0.2	0	0	0.6	0.02	0.09	0.03	0.03	0.06	0.07	0	0.05	0	0	0.03	0	0	0.12	0.35	0.34
XLOC_005168	0.45	0.9	0.42	0.52	0.42	0.44	1.27	0.54	0.11	0.43	0.33	0.08	0.22	0.39	0.49	0.42	0.32	0.12	0.08	0.16	0.19	0.16	0.19	0.14	0.13	0.12	0.37	0.22	0.35	0.22	0.36	0.05	0.13	0.12	0.17	0.08	0.25	0.08	0.46	0.57	0.12	0.32	0.3	0.09	0.2	0.29	0.42	0.36	0.03
XLOC_005171	4.56	3.01	3.86	2.87	1.11	1.85	1.22	1.95	0.31	0.21	0.44	0.21	0.26	0.14	0.14	0.3	0.38	1.17	0.73	0.54	1.98	0.93	0.91	0.98	0.25	0.29	0.25	0.26	0.64	0.48	0.8	0.69	0.46	0.39	3.19	2.09	2.11	0.78	1.86	1.12	0.21	0.21	0.66	0.49	0.72	0.7	0.68	0.59	1.51
XLOC_005180	0	0	0	0.04	0.46	0.29	0.13	0.25	0.06	0.12	0.25	0.23	1.05	0.16	0.29	0.27	0.1	0.15	0	0.09	0.13	0	0	0.16	0.13	0.08	0.05	0.05	0.03	0.08	0	0.81	0.38	0.18	0.22	0.37	0	0.24	0	0.48	0	0.05	0	0.02	0.14	0.11	0	0.13	0.05
XLOC_005183	0.1	0.07	0.11	0.18	0.15	0.13	0.16	0.11	0.23	0.13	0.04	0.07	0.09	0.07	0.07	0.03	0.09	0	0.03	0	0.02	0	0.18	0	0.07	0	0	0	0.08	0.06	0.07	0.02	0.14	0.02	0.23	0.19	0	0.26	0.52	0.28	0.38	0	0	0	0.18	0.18	0	0	0.08
XLOC_005188	0.34	0.32	0.2	0.97	0.87	0.12	0.25	0.6	0.12	0.14	0.18	0.07	0.26	0.27	0.6	0.35	0.1	0.42	0.14	0.2	0.06	0.17	0.38	0.12	0.46	0.11	0	0.21	0.38	0.08	0	0.13	0.49	1.01	0.19	0.4	0	0.42	0.16	0.92	0	0.89	0.04	0.79	0	0	0.6	0.28	0.08
XLOC_005189	0	0.08	0.26	0	0	0.21	0	0.11	0	0.06	0	0	0.03	0.03	0	0	0	0	0	0	0	0	0.05	0.15	0	0	0.03	0.06	0	0	0.03	0	0	0	0.11	0	0	0.12	0.14	0	0	0.03	0	0	0.18	0.04	0.08	0	0.07
XLOC_005190	0	0.04	0.02	0	0	0.16	0.11	0.05	0.02	0.06	0.05	0	0.07	0.02	0	0.04	0.09	0.05	0.13	0.03	0.11	0.11	0	0	0.1	0.03	0.03	0	0.17	0.13	0.02	0.02	0	0.11	0.06	0.06	0	0.1	0	0.07	0.07	0.19	0	0	0.04	0.06	0.04	0.02	0
XLOC_005193	0.1	0	0	0	0.14	0	0.09	0.09	0.17	0.23	0.1	0.08	0.08	0	0.16	0.06	0	0.11	0.05	0.23	0	0.23	0.08	0.21	0.05	0.03	0.11	0	0.15	0	0.13	0.09	0	0.04	0.09	0.14	0.12	0	0.17	0	0.05	0.37	0.27	0.17	0.2	0.43	0.26	0.03	0
XLOC_005196	0.37	0.4	0	0.44	0.05	0.09	0.15	0.19	0.24	0.93	0.26	0.2	0.13	0.21	0.27	0.34	1.26	0.45	0.16	0.29	0.27	0.26	0.47	0.62	0.75	0.6	0.24	0.29	0.17	0.59	0.14	0.64	0.64	1.45	0.55	0.42	0.16	0.33	0.62	0.15	0.32	0.67	0.06	0.89	0.43	0.47	1.02	0.69	0.48
XLOC_005199	0	0	0	0	0.03	0	0	0	0.03	0.08	0.18	0.11	0	0.06	0.14	0	0	0.02	0.39	0.05	0.12	0.03	0	0.07	0.07	0	0.03	0.07	0.1	0.02	0	0.21	0.04	0	0.05	0	0.07	0.11	0	0.12	0.19	0.03	0	0	0.03	0.06	0.02	0	0.03
XLOC_005205	0	0	0	0	0	0	0	0	0.11	0.05	0.09	0.18	0.14	0.11	0.12	0.11	0.07	0.11	0.05	0.4	0.09	0.12	0.1	0.1	0.45	0	0.21	0.09	0.03	0.31	0.05	0	0.14	0.13	0.39	0.26	0.02	0.2	0.11	0.22	0.13	0	0.12	0.06	0.3	0.38	0.17	0.12	0.05
XLOC_005206	0.06	0.19	0	0.27	0	0	0.11	0	0.24	0.18	0.03	0.12	0.03	0	0.25	0.03	0.25	0.18	0.52	0.06	0.36	0.07	0.09	0.1	0	0.03	0	0	0.36	0.03	0.58	0.28	0.25	0.08	0.05	0	0	0.12	0	0.39	0.41	0.03	0.06	0.4	0.14	0.28	0.12	0.12	0.13
XLOC_005209	0.73	0.79	0.6	0.66	1.01	0.76	1.12	0.35	0.06	0.03	0.2	0.36	0.32	0.14	0.08	0.23	0.38	0.23	0.25	0.24	0	0	0.08	0.59	0	0.03	0.03	0.23	0.09	0	0.58	0.51	0.07	0.25	0.09	0	0.25	0.1	0.11	0.61	0.43	0.37	0.33	0.39	0.49	0.06	0.27	0.66	0
XLOC_005217	1.31	0.91	0.36	0.9	1.76	1	1.01	1.44	0.14	0.5	0.27	0.44	0.57	0.58	0.31	0.79	0.22	0.21	0.06	0.38	0.69	0.38	0.49	0.4	0.25	0.36	0.18	0.18	0.22	0.33	0.49	0.41	0.39	0.31	0.27	0.33	0.24	0.21	0.39	0.68	0.53	0.74	0.59	0.54	0.96	0.66	0.72	1.05	0.33
[truncated: 1,789 more rows]
[truncated: 17 more columns]
