# Supplementary material for: Annotation and cluster analysis of spatiotemporal- and sex-related lncRNA expression in rhesus macaque brain
Source: HighWire-hosted journal article supplement (doi:10.1101/gr.217463.116), 2017-07-07
Supplement: Supplemental_Material.tar.gz [file All_sample_LncRNA_exp_RPKM.xlsx]

## Sheet: All_sample_LncRNA_exp_RPKM_anno
LncRNA	CB_01F	CB_01M	CB_04F	CB_04M	CB_10F	CB_10M	CB_20F	CB_20M	DG_01F	DG_01M	DG_04F	DG_04M	DG_10F	DG_10M	DG_20F	DG_20M	PFC_01F	PFC_01M	PFC_04F	PFC_04M	PFC_10F	PFC_10M	PFC_20F	PFC_20M	PCC_01F	PCC_01M	PCC_04F	PCC_04M	PCC_10F	PCC_10M	PCC_20F	PCC_20M	CA1_01F	CA1_01M	CA1_04F	CA1_04M	CA1_10F	CA1_10M	CA1_20F	CA1_20M	OC_01F	OC_01M	OC_04F	OC_04M	OC_10F	OC_10M	OC_20F	OC_20M	PC_01F
XLOC_000001	1.37	3.62	1.53	2.83	2.68	2.96	3.12	3.84	0.98	1.1	0.89	0.75	0.63	0.55	0.57	0.95	1.26	1.17	0.53	0.57	0.71	0.63	0.71	1.11	0.61	0.86	0.41	0.62	0.7	0.43	0.71	0.59	0.95	0.92	0.78	0.56	1.55	1.62	0.89	1.49	0.49	0.61	0.09	0.4	0.42	0.3	0.42	0.46	0.97
XLOC_000002	0	0	0	0	0	0	0	0	0	0	0	0	0	0	0	0	0	0	0	0	0	0	0	0	0	0	0	0	0	0	0	0	0	0	0	0	0	0	0	0	0	0	0	0	0	0	0	0	0
XLOC_000003	1.2	0.81	0.74	1.58	1.24	2.42	2.84	1.01	0.3	0.75	0.48	0.42	1.02	0.71	0.7	0.46	0.44	1.19	1.16	0.78	0.21	1.11	0.91	1.18	0.58	0.53	0.19	0.36	0.79	0.99	1.41	0.49	0.21	0.38	0.32	0.34	0.05	0	0.73	0.26	0.85	0.25	1.41	0.9	0.78	0.45	0.66	1.79	0.65
XLOC_000004	0	0	0	0	0	0	0	0	0	0	0	0	0	0	0	0	0	0	0	0	0	0	0	0	0	0	0	0	0	0	0	0	0	0	0	0	0	0	0	0	0	0	0	0	0	0	0	0	0
XLOC_000005	0.15	0.7	0.2	0.46	0.51	0.97	0.39	0.62	0	0.13	0	0.08	0.1	0.14	0.3	0.21	0.07	0.26	0.06	0.15	0.08	0.04	0.12	0.08	0	0	0	0.02	0	0.09	0	0.04	0	0.16	0.03	0.18	0.1	0.22	0.25	0	0	0.08	0.07	0.15	0.04	0.24	0.08	0.04	0.07
XLOC_000006	0.22	0.1	0	0.12	0	0.06	0	0	0	0	0	0.02	0	0	0	0	0.03	0	0	0	0	0	0.03	0	0	0	0	0	0	0	0	0	0	0	0	0	0	0.04	0.04	0	0	0	0	0	0	0	0	0	0
XLOC_000007	0.46	0.74	0.5	1.14	1.25	0.92	0.77	1.45	0.96	0.82	0.69	0.99	0.76	0.18	0.56	0.4	0.36	0.62	0.23	0.28	0.84	0.04	0.5	0.39	0.4	0.17	0.06	0.33	0.16	0.03	0.22	0.28	0.35	0.81	0.51	0.99	0.27	0.12	0.33	1.17	0.19	0.46	0.27	0.74	0.09	0.12	0.18	0.51	0.33
XLOC_000008	335.58	319.89	318.56	287.99	242.09	274.01	226.51	278	512.02	406.41	401.94	365.45	244.51	202.26	240.61	231.84	532.33	276.48	389.55	335.08	369.08	346.11	369.35	325.68	694.19	425.16	379.2	441.4	391.9	378.07	465.09	372.73	373.29	430.18	794.56	612.98	583.38	566.03	501.95	519.61	545.55	343.64	384.68	376.41	422.58	384.77	519.37	309.02	430.64
XLOC_000009	3.76	3.1	4.08	3.36	4.67	2.92	3.45	1.87	32.17	30.04	32.92	34.47	29.71	29.19	25.14	24.02	51.27	36.58	35.55	37.2	30.91	28.09	30.74	26.52	61.34	50.62	29.86	42.34	33.57	32.08	34.65	24.42	38.73	35.28	25.12	24.61	31.84	37.56	32.28	30.6	49.37	35.91	19.32	20.51	20.45	20.91	17.5	17.39	48.88
XLOC_000010	0	0	0	0	0	0	0	0	0	0	0	0	0	0	0	0	0	0	0	0	0	0	0	0	0	0	0	0	0	0	0	0	0	0	0	0	0	0	0	0	0	0	0	0	0	0	0	0	0
XLOC_000011	0	0	0	0.07	0	0	0	0	0.05	0	0	0	0.07	0	0	0.03	0	0	0	0	0	0	0.04	0	0	0.07	0.56	0	0	0	0	0	0	0.03	0	0	0	0	0	0	0	0.07	0	0	0	0	0.03	0	0
XLOC_000012	0.85	0.66	0.85	1.13	0.85	0.32	0.89	0.29	0.95	0.79	1.01	0.92	0.41	0.2	0.59	0.48	1.01	1.19	1.31	1.37	1.63	1.15	2.36	1.55	1.03	0.53	1.41	0.98	0.96	0.91	1.8	0.46	1.13	0.5	0.84	2.01	1.03	0.85	1.41	0.78	0.19	0.32	0.21	0.42	0.28	0.14	0.83	0.19	0.46
XLOC_000013	0.87	0.76	0.42	1.84	1.03	1.42	0.65	0.71	0.05	0.01	0.02	0.15	0.04	0.09	0.08	0.17	0.04	0.04	0.21	0.23	0.26	0.17	0.1	0.48	0.04	0.05	0.11	0.13	0.12	0.17	0.14	0.24	0.2	0.06	0.27	0.51	0.19	0.17	0.13	0.34	0.21	0.14	0.26	0.84	0.27	0.44	0.16	0.36	0.05
XLOC_000014	19.55	20.57	13.44	35.05	22.79	27.28	20.12	30.95	6.48	3.28	4.43	4.34	3.96	3.3	1.51	6.2	8.92	3.95	6.83	8.13	12.62	12.59	7.15	14.51	9.39	3.81	4.7	6.85	10.64	7.32	8.68	12.6	8.18	4.08	4.08	4.49	6.13	7.56	3.79	9.54	10.7	4.46	5.42	7.97	9.9	9.43	7.12	11.68	8.53
XLOC_000015	2.59	2.09	2.71	3.07	2.81	3.05	2.92	3.23	0.92	0.67	1.05	0.85	0.79	0.67	0.83	1.03	2.29	1.47	2.32	2.68	2.19	1.97	2.5	2.2	1.93	1.54	2.27	2.66	1.9	1.57	2.34	2.47	1.84	2.08	1.16	0.95	0.71	0.89	1.32	0.73	3.62	2.41	2.66	3.34	3.41	2.26	2.5	3.03	2.26
XLOC_000016	1.06	1.17	1.45	0.99	1.73	0.83	1.58	0.87	0.95	0.95	1.53	1.4	1.21	0.7	1.01	0.84	0.95	1.13	1.9	1.43	1.67	1.66	2.11	1.09	1.26	1.49	1.62	1.36	2.12	1.47	2.28	1.37	0.98	0.89	1.44	0.94	1.19	1.37	1.68	0.96	1.36	1.34	1.59	1.64	1.49	1.17	1.99	1.12	1.01
XLOC_000017	3.74	5.43	3.87	4.57	6.12	2.05	3.42	5.52	0.02	0.01	0.02	0.03	0	0	0.01	0.01	0.02	0.09	0.03	0.02	0.07	0.02	0.02	0.06	0.11	0.05	0.06	0.01	0.04	0.06	0.06	0.04	0.03	0.07	0	0.03	0	0	0.01	0.01	0.07	0.08	0.13	0.11	0.13	0.05	0.05	0.14	0.07
XLOC_000018	0.44	0.15	0.15	0.46	0.52	0.76	0.81	0.87	0.98	0.97	1.19	1.21	0.68	0.5	0.57	0.65	2.95	1.63	2.96	3.25	2.03	1.59	2.75	1.25	2.17	0.81	1.55	2.4	1.1	0.86	0.78	0.86	1.63	0.86	0.56	1.56	1.13	1.21	0.63	0.35	0.83	0.19	0.12	0.31	0.47	0.19	0.7	0.32	1.67
XLOC_000019	0	0.03	0.03	0	0	0.06	0.02	0.08	0.39	0.07	0.26	0.4	0.27	0.25	0.38	0.24	0.18	0.18	0.4	0.21	0.17	0.03	0.3	0.36	0.21	0.31	0.17	0.13	0.19	0.52	0.24	0.48	0.1	0.21	0.66	0.28	0.38	0.39	0.54	0.48	0.05	0.06	0.04	0.06	0.13	0.14	0.3	0.11	0.16
XLOC_000020	0.23	0.34	0.48	0.42	0.2	0.23	0.37	0.44	0.37	0.23	0.5	0.23	0.25	0.22	0.24	0.44	0.41	0.12	0.23	0.29	0.24	0.04	0.39	0.37	0.41	0.04	0.26	0.41	0.14	0.12	0.67	0	0.19	0.12	0.53	0.03	0.28	0	0.46	0.82	0.36	0.34	0.46	0.3	0.59	0.04	0.79	0.47	0.34
XLOC_000021	0.34	0.12	0.11	0.22	0.18	0.24	0.31	0.14	0.05	0.16	0.13	0.03	0.02	0.09	0.22	0.04	0.17	0.17	0.25	0.18	0.36	0.15	0.56	0.39	0.12	0.12	0.03	0.37	0.04	0.24	0.26	0	0.35	0.16	0.2	0	0.24	0.54	0.46	0.14	0.03	0.27	0.03	0.08	0.49	0	0.29	0.39	0
XLOC_000022	0.02	0.04	0.08	0.08	0.09	0	0	0.04	0.72	0.5	0.3	0.99	3.13	1.48	2.03	2.39	0.04	0.28	0.18	0.19	0.04	0.06	0.18	0.1	0.13	0.1	0.03	0.12	0.03	0.02	0.01	0.17	0.15	0.45	0.3	0.16	0.43	0.13	0.78	0.85	0.04	0.04	0	0.05	0.03	0.06	0.04	0.02	0.05
XLOC_000023	0	0	0	0	0	0	0	0	0	0	0	0	0	0	0	0	0	0	0	0	0	0	0	0	0	0	0	0	0	0	0	0	0	0	0	0	0	0	0	0	0	0	0	0	0	0	0	0	0
XLOC_000024	0	0	0	0	0	0	0	0	0	0	0	0	0	0	0	0	0	0	0	0	0	0	0	0	0	0	0	0	0	0	0	0	0	0	0	0	0	0	0	0	0	0	0	0	0	0	0	0	0
XLOC_000025	0.01	0.01	0.02	0.02	0.01	0.01	0.02	0.03	0.3	0.28	0.28	0.57	2.65	1.19	1.44	1.9	0.07	0.08	0.05	0.03	0.05	0.01	0.03	0.05	0.08	0.08	0.02	0	0.08	0.01	0.02	0.05	0.13	0.19	0.06	0.1	0.27	0.1	0.45	0.37	0.03	0.06	0.01	0.04	0.01	0.01	0.07	0.01	0.07
XLOC_000026	0	0.05	0.03	0	0.03	0	0	0.05	0.25	0.66	0.6	0.89	2.58	1.42	0.9	1.62	0.04	0.09	0.01	0.05	0.04	0.07	0.02	0.09	0.04	0.11	0	0.01	0.03	0.03	0.04	0.07	0.14	0.25	0.14	0.16	0.49	0.21	0.47	0.66	0	0.06	0	0.06	0	0.04	0.09	0.07	0.05
XLOC_000027	0.12	0.28	0.4	0.27	0.47	0.86	0.61	0.62	0.02	0.02	0.15	0.03	0.08	0.07	0.06	0	0.12	0.21	0.47	0.18	0.29	0.15	0.41	0.24	0.08	0.14	0.28	0.14	0.29	0.36	0.16	0.25	0.09	0.13	0.17	0.12	0.12	0.29	0.12	0.14	0.19	0.21	0.74	0.26	0.59	0.35	0.68	0.39	0.18
XLOC_000028	0	0.08	0.03	0	0	0	0.11	0	0	0	0.06	0	0	0	0	0	0.03	0	0.08	0	0	0	0	0	0.02	0	0.09	0.02	0	0	0	0	0	0.09	0.22	0	0	0	0.18	0.04	0	0	0	0	0	0.29	0	0.05	0.04
XLOC_000029	7.8	6.3	5.71	5.23	7.2	6.7	6.79	7.54	7.99	6.83	8	6.76	4.82	4.13	4.43	5.12	8.72	4.73	6.02	5.27	6.86	5.37	6.41	5.68	10.41	8.61	7.51	7.21	7.13	7.46	7.07	6.5	7.38	7.54	6.87	6.55	8.21	10.03	6.51	8.31	8.19	8.14	7.41	6.4	7.58	7.13	8.09	7.36	6.88
XLOC_000030	0.72	0.85	0.83	0.79	0.98	1.12	0.98	1.24	0.53	0.44	0.58	0.64	0.69	0.57	0.38	0.49	0.67	0.58	0.85	1.11	0.71	0.61	0.84	0.86	0.62	0.45	0.76	0.52	0.46	0.49	0.75	0.96	0.67	0.4	0.43	0.27	0.47	0.6	0.43	0.71	1.42	1.62	1.72	1.9	1.61	1.78	1.69	2.64	0.83
XLOC_000031	3.31	2.15	2.25	2.13	1.83	2.77	1.59	2.14	1.06	0.73	1.12	1.01	1.75	1.52	1.25	1.28	1.07	0.88	1.15	1.27	1.04	0.89	0.93	0.77	0.89	0.9	0.76	0.93	0.87	0.85	0.65	0.76	1.57	0.89	0.61	0.81	1.01	0.82	0.87	0.74	1.86	1.31	2.21	1.29	1.35	1.07	1.41	0.97	1.66
XLOC_000032	1.03	0.47	0.63	0.46	0.28	0.18	0.36	0.34	0.11	0.24	0.1	0.12	0.15	0.09	0.04	0.16	0.19	0.11	0.04	0.06	0.17	0.07	0.16	0.08	0.25	0.16	0.16	0.14	0.04	0.07	0.01	0.14	0.21	0.12	0.09	0.13	0.02	0.23	0.03	0.11	0.13	0.26	0.2	0.16	0.23	0.21	0.11	0.14	0.3
XLOC_000033	0.53	0.31	1.06	0.91	1.65	1.24	3.43	2.17	0	0	0	0.01	0	0	0	0	0.05	0	0.06	0.02	0.03	0.1	0.05	0.02	0	0.04	0.04	0.01	0	0	0	0	0	0	0.01	0	0	0	0	0	0	0	0.02	0.02	0	0.05	0	0	0
XLOC_000034	0.07	0	0.42	0.23	0.72	0	0.74	0.13	0	0	0	0	0	0.04	0	0	0	0	0	0	0	0	0	0	0	0	0	0	0	0	0	0	0	0	0	0	0	0	0	0	0	0	0	0	0	0	0	0	0
XLOC_000035	0.69	0.31	0.47	0.34	0.67	0.59	0.43	0.58	0.27	0.36	0.58	0.21	0.26	0.25	0.19	0.36	0.33	0.25	0.47	0.34	0.42	0.44	0.41	0.39	0.46	0.17	0.29	0.31	0.61	0.52	0.54	0.47	0.42	0.45	0.52	0.47	0.79	0.74	0.48	0.91	0.3	0.3	0.43	0.56	0.68	0.27	0.38	0.52	0.38
XLOC_000036	0.16	0.29	0.24	0.17	0.18	0.21	0.28	0.28	0.13	0.16	0.12	0.13	0.19	0.09	0.15	0.14	0.09	0.21	0.18	0.2	0.2	0.15	0.21	0.11	0.19	0.05	0.12	0.26	0.07	0.14	0.53	0.18	0.19	0.08	0.25	0.11	0.14	0.07	0.06	0.26	0.05	0.22	0.21	0.11	0.16	0.17	0.4	0.15	0.24
XLOC_000037	11.96	12.37	13.62	13.28	11.55	12.65	13.87	15.64	3.68	3.64	3.72	4.45	5.12	7.08	5.64	5.59	2.84	3.76	3.08	3.92	2.86	3.82	2.9	3.83	4.66	3.79	5.36	5.01	3.21	6.03	3.08	6.04	5.81	4.67	4.66	4.08	2.6	4.45	4.95	3.06	5.71	7.28	8.32	7.45	6.65	6.02	7.32	6.21	4.46
XLOC_000038	0	0.08	0.03	0.14	0.02	0.16	0	0.02	0.04	0.05	0.11	0.17	0.05	0.01	0.25	0.13	0.14	0.1	0	0.13	0.14	0.14	0.02	0.12	0.13	0	0	0.11	0.01	0.08	0	0.08	0	0	0	0	0.02	0.16	0.05	0.03	0.1	0.11	0.08	0.09	0.13	0.01	0.06	0.06	0.15
XLOC_000039	1.23	1.34	1.17	0.9	1.56	1.12	1.46	1.67	0.48	0.58	0.69	0.96	0.54	0.83	0.86	0.81	0.73	0.42	1.31	1.04	0.97	1.18	1.16	1.44	0.22	0.25	0.47	0.86	0.87	1.22	1.46	0.5	1.1	0.36	1	0.83	1.45	1.21	0.6	0.81	1.27	1.03	1.49	1.62	1.5	0.94	1.52	1.1	1.02
XLOC_000040	1.41	1.27	1.25	1.57	1.33	1.95	1.52	1.56	1.11	0.89	1.29	0.88	1.49	1.04	0.73	1.29	0.93	1.1	1.16	1.48	0.94	1.13	1.28	1.57	0.77	0.67	0.98	1.17	0.79	0.93	0.63	0.65	1.14	0.84	0.85	1.21	0.76	0.67	1.05	1.44	1.09	1.03	1.53	1.85	1.08	1.46	0.99	1.81	1.04
XLOC_000041	0.23	0.13	0.19	0.03	0.11	0.16	0.03	0.27	0.04	0	0.02	0.1	0.04	0.04	0.06	0.04	0.06	0.05	0.04	0.04	0	0	0.03	0.19	0	0	0.02	0	0	0.05	0	0.05	0.05	0	0	0	0	0	0.09	0.6	0	0	0.13	0.02	0	0	0	0.2	0
XLOC_000042	0.53	0.13	0.48	0	0.26	0.23	0.18	0.12	0	0	0	0	0	0	0	0	0.15	0	0	0	0.12	0.4	0.05	0	0	0	0	0	0	0	0.07	0	0.29	0	0	0	0	0	0	0	0	0	0.04	0	0	0.16	0	0.04	0
XLOC_000043	0	0	0	0	0	0	0	0	0.24	0.04	0	0.15	0.04	0.08	0.53	0.08	0.48	0.05	0.14	0.07	0.12	0	0.16	0.47	0.73	0.04	0.5	0.14	0	0.08	0.33	0.04	0.55	0	0.13	0.54	0	0	0.16	0	0.53	0.75	0.19	0.45	0.41	0.41	0.23	0.14	0.31
XLOC_000044	0	0	0.01	0	0	0.05	0	0.02	0.22	0.62	0.29	0.2	0.1	0.09	0.3	0.27	0.05	0.06	0.09	0.05	0.02	0.11	0.11	0.03	0	0.02	0.02	0.07	0.02	0.05	0	0.15	0.26	0.3	1.22	0.61	0.71	0.85	0.99	0.68	0.05	0.04	0.02	0	0	0	0	0.04	0.04
XLOC_000045	0.5	0.72	0.53	0.61	0.6	0.51	0.54	0.56	0.33	0.32	0.41	0.3	0.34	0.42	0.63	0.38	0.18	0.23	0.35	0.23	0.17	0.2	0.42	0.48	0.2	0.24	0.28	0.19	0.07	0.13	0.2	0.15	0.28	0.47	0.22	0.15	0.19	0.43	0.49	0.3	0.37	0.26	0.18	0.15	0.31	0.25	0.53	0.39	0.32
XLOC_000046	0	0	0	0	0	0	0	0	0	0	0	0	0	0	0	0	0	0	0	0	0	0	0	0	0	0	0	0	0	0	0	0	0	0	0	0	0	0	0	0	0	0	0	0	0	0	0	0	0
XLOC_000047	0.67	1.16	0.96	1.09	1.11	1.79	1.58	1.33	0.52	0.84	0.92	0.62	0.69	0.84	0.86	0.68	0.54	0.53	0.99	0.51	0.67	0.99	1.07	0.56	0.59	0.46	0.8	0.33	0.37	0.59	1.09	0.64	0.76	0.79	0.84	0.46	0.62	0.92	1.05	0.77	0.36	0.59	1.4	0.65	0.55	1.17	1.59	0.88	0.64
XLOC_000048	0	0	0	0	0	0	0	0	0	0	0.12	0	0	0	0	0	0	0	0.16	0	0	0	0	0	0	0	0	0	0	0.14	0	0	0	0	0.15	0	0	0	0	0	0	0	0.26	0.08	0	0	0	0	0
XLOC_000049	0.07	0	0.11	0.06	0	0	0.07	0	0	0	0	0	0.08	0.13	0.12	0	0.06	0	0	0	0	0.09	0	0	0	0	0	0	0.55	0	0	0	0	0	0	0	0	0	0	0.08	0	0.04	0.08	0.07	0.48	0	0.05	0	0
XLOC_000050	0	0	0	0	0	0	0	0	0.03	0	0.05	0	0	0	0	0	0.12	0.22	0	0	0	0	0	0	0.53	0.06	0.15	0.03	0	0	0.06	0	0.08	0.15	0	0	0	0	0	0	0	0.2	0	0	0	0.06	0	0.35	0.18
XLOC_000051	0	0	0	0	0.04	0	0	0	0	0	0	0	0	0	0	0	0.03	0	0.04	0.08	0	0	0	0.03	0.02	0.47	0.07	0.02	0.08	0.1	0	0	0	0.03	0	0	0	0	0	0	0.02	0	0	0	0.17	0	0.03	0	0.05
XLOC_000052	2.35	2.63	1.7	1.38	1.38	1.38	0.76	1.94	0.21	0.25	0.21	0.06	0.03	0.05	0.04	0.12	0.2	0.4	0.26	0.14	0.15	0.14	0.13	0.25	0.2	0.23	0.25	0.06	0.19	0.21	0.1	0.19	0.24	0.38	0.27	0.2	0.06	0.17	0.09	0.15	0.17	0.3	0.28	0.18	0.21	0.31	0.15	0.26	0.14
XLOC_000053	0.43	0.92	0.28	0.65	0.6	0.59	1.21	1.14	0.86	0.88	0.72	0.59	1.08	0.89	0.12	0.68	0.74	0.41	0.29	0.38	0.29	0.39	0.26	0.58	0.64	0.18	1.24	0.45	0.38	0.66	0.21	0.07	0.7	0.29	0.7	0.31	0.68	0.3	0.17	0.64	0.45	0.37	0.64	0.4	0.49	0.39	0.75	0.58	0.28
XLOC_000054	0	0	0	0.11	0.14	0	0	0.03	0.1	0	0	0.04	0.06	0	0	0.12	0.11	0.02	0.21	0.3	0.25	0	0.03	0.06	0.19	0.27	0.29	0.25	0.45	0	0	0.15	0.15	0.03	0.03	0.07	0	0	0.08	0	0.13	0	0.14	0.12	0.96	0.06	0.07	0	0.31
XLOC_000055	0	0	0	0	0	0	0	0	0	0	0	0.28	0.04	0.04	0	0	0	0	0.08	0.07	0	0.19	0	0	0	0	0	0	0	0	0.33	0.14	0	0.06	0	0	0	0	0.09	0	0	0.08	0.43	0	0.27	0.46	0.31	0	0
XLOC_000056	0	0	0	0	0	0	0	0	0	0	0	0	0	0	0	0	0	0	0	0	0	0	0	0	0	0	0	0	0	0	0	0	0	0	0	0	0	0	0	0	0	0	0	0	0	0	0	0	0
XLOC_000057	0.26	1.82	0.23	0.3	0.4	0.44	0.39	0.5	0.16	0.56	0.21	0.21	0.21	0.28	0.22	0.24	0.05	0.57	0.14	0.08	0.2	0.22	0.15	0.15	0.13	0.56	0.25	0.23	0.33	0.35	0.25	0.22	0.2	0.67	0.46	0.17	0.18	0.44	0.31	0.4	0.19	0.93	0.21	0.16	0.28	0.25	0.25	0.22	0.19
XLOC_000058	0.13	0	0	0.2	0.12	0	0	0	0.07	0.39	0.07	0.1	0	0.04	0.14	0.04	0	0	0	0	0	0	0	0	0.07	0	0	0	0	0.04	0	0	0	0.05	0.06	0.06	0.05	0.13	0.07	0	0	0	0.04	0.03	0.3	0	0	0	0
XLOC_000059	0	0	0	0	0	0	0	0	0	0	0.51	0.04	0	0.09	0	0.19	0	0	0	0	0.15	0	0	0	0	0	0	0	0	0	0	0	0	0	0	0	0.07	0.17	0.66	0.55	0	0	0	0	0	0	0	0	0
XLOC_000060	0.15	0	0.05	0.12	0	0.38	0.07	0.06	0	0	0.04	0.04	0	0.08	0.04	0.08	0	0	0	0	0.07	0.18	0	0	0.49	0	0.12	0	0	0.13	0	0.04	0.53	0.05	0	0	0	0	0	0.17	0.65	0	0.04	0.04	0.13	0	0	0.1	0
XLOC_000061	0	0.12	0.02	0.1	0.09	0.03	0.28	0.16	0.18	0.32	0.42	0.15	0.18	0.26	0.09	0.2	0.19	0.11	0.31	0.27	0.06	0.19	0.1	0.08	0.21	0.44	0.17	0.59	0.06	0.22	0.2	0.06	0.2	0.11	0.2	0.15	0.05	0.57	0.18	0.14	0.27	0.03	0.05	0.09	0.15	0.09	0.08	0.21	0.03
XLOC_000062	0.72	0.76	0.98	0.75	0.95	0.61	1.14	1.01	0.18	0.3	0.32	0.31	0.4	0.36	0.4	0.43	0.28	0.26	0.38	0.26	0.3	0.42	0.23	0.25	0.18	0.23	0.46	0.17	0.31	0.48	0.19	0.23	0.29	0.46	0.38	0.47	0.5	0.29	0.31	0.17	0.31	0.39	0.52	0.35	0.26	0.24	0.49	0.33	0.11
XLOC_000063	1.28	2.01	1.65	0.57	0.9	1.25	0.83	0.56	0.02	0.06	0.02	0.01	0.01	0.01	0.03	0.01	0	0	0	0.02	0.02	0.03	0	0	0.04	0	0.01	0.01	0.06	0	0	0	0	0.03	0	0.02	0.05	0	0.07	0.02	0	0	0	0	0.06	0	0.04	0	0.01
XLOC_000064	0	0	0	0	0	0	0	0	0	0	0	0	0	0	0	0	0	0	0	0	0	0	0	0	0	0	0	0	0	0	0	0	0	0	0	0	0	0	0	0	0	0	0	0	0	0	0	0	0
XLOC_000065	0.42	0.26	0.66	0.12	1.01	0.4	0.57	0.96	0.08	0.01	0.05	0.02	0.08	0.04	0.05	0	0	0.01	0.11	0	0.17	0.04	0.01	0.16	0.02	0	0.03	0	0	0	0.24	0.08	0	0.04	0.05	0.07	0.08	0.04	0.11	0.08	0.04	0	0.26	0.04	0.11	0.14	0.14	0.42	0
XLOC_000066	6.52	8.92	7.43	8.84	8.29	9.38	7.97	8	3.24	2.66	4.59	6.11	6.74	6.4	3.68	3.74	4.93	3.35	4.42	5.12	5.07	5.88	5.69	6.97	3.28	2.36	3.14	5.42	2.44	2.55	2.7	3.23	0.93	2.13	1.73	4.24	1.77	4.18	3.3	2.02	3.21	2.83	3.21	2.94	4.57	4.35	3.55	2.87	3.62
XLOC_000067	4.49	4.33	2.56	3.21	2.79	3.73	3.53	2.8	3.12	2.91	3.29	2.22	2.45	2.56	2.25	2.43	1.08	1.51	1.24	1.99	1.89	1.66	1.23	1.69	1.33	1.38	1.53	0.93	1.05	1.22	1.02	1.7	2.34	2.9	3.19	3.2	1.02	3.46	2.62	3.29	1.11	1.63	1.31	1.83	1.64	1.67	1	1.05	1.91
XLOC_000068	0.05	0.17	0.02	0.09	0.11	0.07	0.04	0	0	0.05	0.1	0.02	0.02	0.03	0.04	0.02	0.27	0.41	0.25	0.31	0.25	0.25	0.3	0.26	0.09	0.22	0.28	0.37	0.15	0.23	0.4	0.21	0.1	0.19	0.11	0.06	0.06	0.18	0.09	0.06	0.54	0.74	0.48	0.5	0.2	0.2	0.26	0.38	0.12
XLOC_000069	0	0	0	0	0	0.06	0	0	0.04	0	0	0	0.04	0.04	0.08	0	0.05	0.05	0.21	0.07	0.12	0.17	0.22	0	0.08	0.19	0.15	0.04	0.21	0	0.18	0	0	0	0	0	0.06	0	0	0	0	0.04	0.46	0.03	0.4	0	0.42	0.14	0.15
XLOC_000070	0	0	0	0	0	0.05	0	0.14	0.06	0	0	0.08	0	0	0	0.03	0.04	0	0.05	0.1	0.1	0.26	0.08	0.18	0.06	0.38	0	0	0	0.25	0.03	0	0	0	0	0.1	0.27	0.11	0	0.06	0.06	0	0.06	0.13	0.19	0.06	0	0	0
XLOC_000071	1.02	1.02	2.37	1.52	1.96	2.66	1.67	1.88	0.48	0.43	0.98	0.56	0.69	0.8	0.49	0.77	0.2	0.25	0.72	0.32	0.82	0.62	0.58	0.91	0.41	0.1	0.76	0.29	0.26	0.54	0.57	0.41	0.61	0.95	1.33	1.49	0.63	0.8	0.59	0.4	1	0.65	1.29	0.6	1.17	0.8	0.65	1.41	0.17
XLOC_000072	0.1	0.1	0.43	0.1	0.07	0.13	0.07	0.13	4.21	5.86	6.48	7.74	9.16	8.4	6.31	8	4.31	5.21	5.79	4.84	5.04	6.04	6.08	5.58	3.37	3.9	4.38	4.96	4.02	5.51	5.69	4.66	2.61	3.07	3.29	3.01	3.49	3.62	5.11	2.91	4.08	4.91	6.03	5.38	5.85	7.01	5.84	6.17	3.9
XLOC_000073	1.95	2.17	1.72	2.15	1.84	2.07	1.79	1.17	0.02	0.01	0.09	0.02	0.02	0	0.03	0	0.05	0.05	0.53	0.48	0.69	0.71	0.44	0.39	0.15	0.17	0.44	0.29	0.82	0.76	1.13	0.79	0.21	0.21	0.29	0.1	0.02	0.16	0.13	0.04	1.02	1.12	2.3	1.92	2.88	2.01	2.04	1.57	0.19
XLOC_000074	0	0	0	0	0	0	0	0	0.07	0.02	0.43	0	0.08	0.05	0.09	0.02	0.19	0.06	0.06	0	0	0.03	0.03	0	0	0	0.1	0.03	0	0	0	0	0.03	0.08	0.12	0.24	0.14	0.04	0.07	0.51	0.05	0.09	0	0	0	0	0	0	0.05
XLOC_000075	1.02	0.77	1.05	0.9	0.58	0.91	0.83	0.85	0.92	0.84	1.11	0.97	1.25	1.18	1.12	1.13	1.01	0.85	0.98	0.98	1.36	0.89	0.96	0.95	1.13	0.94	1.22	0.61	0.97	0.78	0.78	0.84	1.22	1.15	1.15	0.97	0.69	0.87	0.99	1.07	0.81	1.25	1.33	1.18	1.44	0.72	0.82	1.15	0.77
XLOC_000076	3.63	3.58	2.7	6	4.88	5.62	5.65	6.75	1.37	0.96	1.65	2.72	2.86	2.91	3.6	3.6	0.72	1.26	1.17	2.41	1.53	1.75	2.24	2.96	1.22	1.07	1.72	1.67	1.87	1.94	2.13	2.2	1.69	0.94	1.88	2.64	1.57	2.13	3.3	3.58	1.78	1.73	1.69	3.42	3.67	1.73	4.04	3.34	1.19
XLOC_000077	0.08	0.07	0.04	0.15	0.2	0.11	0.13	0.07	0.17	0.17	0.27	0.23	0.1	0.13	0.22	0.09	0.04	0.06	0.09	0.18	0.18	0.14	0.13	0.01	0.09	0.04	0.17	0.11	0.28	0.19	0.45	0.17	0.39	0.5	0.97	0.56	0.74	1.52	0.35	0.63	0.17	0.07	0.18	0.17	0.27	0.03	0.34	0.19	0.06
XLOC_000078	0.18	0.3	0.24	0.38	0.18	0.22	0.3	0.23	0.04	0.27	0.15	0.14	0.08	0.29	0.06	0.11	0.17	0.26	0.22	0.11	0	0.04	0.06	0.16	0.29	0.16	0	0.04	0.39	0.15	0.22	0.18	0.11	0.11	0.28	0.18	0.35	0.15	0.34	0	0.45	0.4	0.37	0.07	0	0.18	0.08	0.2	0.08
XLOC_000079	0.4	0.45	0.06	0.2	0.1	0.17	0.04	0.24	0.1	0	0.06	0.01	0	0.02	0.02	0	0	0	0	0	0.02	0.03	0.03	0.04	0	0.02	0	0.04	0	0	0	0	0.08	0.02	0	0	0.04	0	0	0.02	0	0	0.05	0	0	0	0	0.01	0
XLOC_000080	0.38	0.38	0.2	0.27	0.21	0.22	0.21	0.26	0.06	0	0	0.12	0.14	0.28	0.01	0.16	0	0.04	0	0.08	0	0.23	0.02	0.13	0.02	0.12	0.13	0.1	0.09	0.03	0	0.13	0.11	0.26	0.04	0.06	0.11	0.13	0.12	0	0.07	0.18	0.05	0.08	0	0.13	0.13	0.06	0.14
XLOC_000081	0.38	0.47	0.39	0.12	0.15	1.19	0.92	0.34	0.94	0.56	0.96	0.61	0.41	0.74	0.34	0.49	0.77	0.49	0.39	0.52	0.76	0.47	0.55	0.52	0	0.34	0.52	0.76	0.96	0.82	0.86	0.33	0.72	0.51	0.64	0.75	1.45	0.71	0.89	0.43	0.34	0.25	0.21	0.5	0.45	0.69	0.47	0.36	0.69
XLOC_000082	6.45	6.74	5.64	6.93	5.88	5.01	4.77	6.33	5.1	5.19	5.83	5.3	5.71	6.04	5.35	4.77	5.53	5.58	5.04	5.47	4.97	4.65	5.53	5.09	4.68	4.42	4.89	4.46	3.94	3.7	3.66	3.3	5.2	4.95	5.61	3.84	3.68	3.92	5.12	3.08	4.9	6.52	4.55	5	4.82	4.6	5.77	5.06	5.23
XLOC_000083	4.13	3.93	3.86	3.4	3.41	3.27	3.2	4.13	4.68	4.8	5.17	4.79	6.06	5.96	4.68	5.94	3.96	4.59	4.38	3.99	3.86	3.79	4.4	5.04	3.82	4.27	4.33	3.67	3.75	3.5	3.75	4.2	3.93	4.63	4.38	3.1	3.74	3.72	4.17	3.83	3.74	4.41	4.18	3.97	4.73	4.02	3.44	4.42	3.94
XLOC_000084	0.05	0.62	0.04	0.17	0.11	0.32	0.15	0.05	0.09	0.14	0.03	0.06	0.17	0.3	0.06	0.15	0	0	0.16	0.16	0.05	0.07	0.13	0.05	0.06	0.12	0.03	0.08	0.03	0.06	0	0	0.04	0	0.45	0.31	0	0.33	0.31	0.3	0.09	0.09	0.18	0.19	0.29	0.55	0	0.18	0.12
XLOC_000085	0.12	0	0	0	0	0	0	0	0.14	0	0.21	0	0	0	0	0	0	0.04	0	0	0	0	0.05	0	0.03	0.44	0	0	0	0	0	0	0.13	0	0	0.11	0	0	0	0	0	0	0	0	0.03	0	0	0	0.07
XLOC_000086	0	0	0.01	0	0	0	0	0	0.14	0.09	0.27	0.16	0.11	0.08	0.09	0.09	0.54	0.32	0.28	0.32	0.39	0.15	0.23	0.27	0.36	0.36	0.16	0.42	0.15	0.21	0.29	0.35	0.38	0.38	0.69	0.59	0.78	0.81	0.88	0.99	0.54	0.48	0.29	0.35	0.45	0.25	0.31	0.2	0.4
XLOC_000087	0	0	0.13	0	0	0.01	0	0	0.07	0	0.16	0.06	0.03	0.07	0.03	0.05	0.26	0.39	0.25	0.24	0.11	0	0.28	0.07	0.11	0.13	0.15	0.58	0.29	0.01	0.13	0	0.18	0.16	0.12	0.36	0.09	0.18	0.29	0.07	0.11	0.42	0.16	0.12	0.06	0.06	0.15	0.13	0.04
XLOC_000088	0	0	0	0	0	0	0	0	0	0	0	0	0	0	0	0	0	0	0	0	0	0	0	0	0	0	0	0	0	0	0	0	0	0	0	0	0	0	0	0	0	0	0	0	0	0	0	0	0
XLOC_000089	0.31	0.54	0.27	0.45	0.53	0.23	0.43	0.36	0.33	0.23	0.36	0.18	0.27	0.24	0.24	0.25	0.23	0.22	0.36	0.37	0.28	0.35	0.23	0.23	0.32	0.45	0.3	0.19	0.27	0.33	0.29	0.19	0.3	0.41	0.3	0.73	0.42	0.46	0.31	0.28	0.26	0.51	0.56	0.47	0.39	0.28	0.39	0.37	0.27
XLOC_000090	1.07	1.22	1.12	0.97	1.21	1.14	1.1	0.91	0.65	0.5	0.94	0.76	0.73	0.81	1	0.86	0.7	1	0.46	1.12	0.97	1.4	0.52	1.44	0.53	0.09	0.53	1.13	0.38	0.88	0.99	0.35	0.42	0.67	0.92	0.88	0.95	0.38	0.86	0.88	0.48	0.63	0.51	0.6	0.66	0.84	1.03	0.95	1.07
XLOC_000091	0.53	0.46	0.29	0.83	0.57	0.58	0.27	0.67	0.03	0.17	0.18	0.19	0.11	0.21	0.06	0.12	0.07	0.21	0.47	0.09	0.11	0.18	0.21	0.58	0.13	0.55	0.11	0.26	0.4	0.12	0.05	0.11	0.04	0.37	0	0.06	0	0.03	0.07	0	0.47	0.18	0.11	0.59	0.43	0.02	0.58	0.34	0.07
XLOC_000092	0	0.06	0.32	0.63	0.18	0.23	0.2	0.16	0.29	0.23	0.23	0.26	0.19	0.25	0.74	0.28	0.17	0.06	0	0.09	0.08	0.38	0.11	0.34	0.02	0.1	0.83	0.02	0.36	0.16	0.55	0.11	0.45	0.26	0.96	1.48	0.88	0.78	0.83	1.61	0.34	0.2	0.57	0.92	0.26	0.59	0.73	0.3	0.1
XLOC_000093	0	0.02	0	0.03	0	0	0.06	0.03	0.18	0	0	0.04	0.02	0.02	0.15	0.12	0	0.02	0	0	0	0.04	0	0.06	0.04	0	0.15	0.1	0.04	0	0.11	0	0.07	0.12	0.6	0	0	0.03	0.08	0.08	0.02	0.04	0	0.05	0.04	0.02	0.07	0.02	0
XLOC_000094	0.11	0.04	0.04	0.04	0.02	0.02	0.01	0.02	0.01	0.04	0.25	0.04	0.02	0.02	0.01	0.01	0.67	0.74	0.92	0.6	0.73	0.86	0.53	0.49	0.83	0.7	0.39	0.2	0.36	0.56	0.51	0.51	1.29	1.01	0.29	0.09	0.04	0.19	0.15	0.03	1.03	2.03	1.1	1.3	1.13	1.05	0.81	1.12	0.95
XLOC_000095	0.1	0.07	0.07	0.04	0.05	0	0.14	0.13	6.81	8.68	5.7	8.1	5.25	6.19	4.88	7.43	2.6	3.5	1.81	1.4	0.4	1.27	0.55	0.72	1.39	2.01	1.11	2.91	0.62	0.95	1.25	0.3	2.3	2.79	2.27	4.8	4.82	6.98	4.25	4.14	0.57	0.65	0.44	0.4	0	1.34	0.27	0.3	2.13
XLOC_000096	0.46	0.48	0.3	0.32	0.44	0.54	0.37	0.39	0.23	0.23	0.37	0.23	0.27	0.31	0.23	0.26	0.03	0.11	0.05	0.07	0.13	0.13	0.17	0.16	0.14	0.1	0.17	0.04	0.21	0.27	0.15	0.25	0.17	0.16	0.28	0.14	0.21	0.18	0.3	0.17	0.15	0.19	0.26	0.15	0.25	0.22	0.4	0.5	0.12
XLOC_000097	0.08	0.05	0	0.03	0	0	0.04	0.04	0.09	0.1	0.25	0.1	0.13	0.04	0.22	0.05	0	0	0.08	0.08	0.07	0	0.22	0	0.04	0	0	0	0	0	0.13	0.34	0	0.18	0	0	0	0	0.09	0	0.13	0.11	0.09	0.16	0.33	0.02	0.3	0	0.04
XLOC_000098	0.3	0.49	0.17	0.24	0.41	0.31	0.28	0.27	0.07	0.09	0.22	0.25	0.46	0.14	0.27	0.28	0.14	0.09	0.12	0.18	0.38	0.07	0.24	0.36	0.17	0	0.34	0.06	0.08	0.22	0.06	0.33	0.04	0.31	0.28	0	0.16	0.12	0.21	0.2	0.37	0.16	0.13	0.24	0.43	0.11	0.25	0.29	0.2
XLOC_000099	0.57	0.48	0.9	0.94	0.35	0.64	0.57	0.55	0.56	0.31	0.84	0.38	0.72	0.74	0.84	0.59	0.24	0.63	0.5	0.23	0.39	0.46	0.41	0.32	0.66	0.9	0.63	0.39	0.53	0.24	0.09	0.67	0.48	0.86	0.8	0.65	0.27	0.32	0.33	0.8	0.51	0.66	0.78	0.85	0.65	0.47	0.24	0.92	0.67
XLOC_000100	0.13	0.21	0.26	0.28	0.18	0.19	0.16	0.16	0.11	0.19	0.3	0.26	0.39	0.23	0.2	0.03	0.17	0.19	0.32	0	0.45	0	0.29	0.19	0.2	0.07	0.1	0.33	0.25	0.05	0.05	0.03	0.19	0.4	0.13	0.18	0.31	0.14	0.16	0	0.32	0.17	0.15	0.43	0.21	0.14	0.09	0.36	0
XLOC_000101	0.55	0.64	0.29	0.38	0.29	0.32	0.31	0.26	0.38	0.48	0.4	0.21	0.64	0.33	0.46	0.14	0.17	0.37	0.22	0.09	0.42	0.09	0.19	0.32	0.31	0.31	0.33	0.3	0.33	0.52	0.38	0.07	0.32	0.38	0.28	0.67	0.27	0.06	0.26	0.4	0.39	0.23	0.28	0.19	0.23	0.12	0.28	0.24	0.08
XLOC_000102	0	0.13	0.07	0.08	0	0.06	0	0	0.15	0.13	0.03	0.12	0.03	0.04	0.21	0.02	0.05	0.11	0.16	0.09	0	0.12	0.05	0.05	0.2	0.02	0.05	0.17	0.02	0	0	0	0.21	0.17	0.15	0.03	0	0.13	0.07	0.11	0	0.21	0	0	0.13	0.15	0.04	0	0.18
XLOC_000103	0.49	0.49	1.41	0.64	0.45	0.9	0.69	1.12	0.52	0.45	0.27	0.86	0.39	0.72	0.54	0.36	0.35	0.3	0.33	0.29	0.35	0.48	0.21	0.42	0.55	0.18	0.37	0.34	0.98	0.47	0.4	0.48	0.35	0.31	0.46	0.54	0.28	0.13	0.83	0.51	0.2	0.75	0.69	0.21	0.54	0.59	0.35	0.57	0.22
XLOC_000104	1.14	0.99	0.94	1.25	0.95	1.3	1.21	1.17	1.14	1.41	1.42	0.81	1.28	1.05	1.03	1.02	0.73	0.88	1.04	1.12	1.09	0.99	1.19	0.94	0.6	0.59	0.96	0.75	0.83	0.85	1.08	0.91	0.93	0.96	0.72	0.49	1.03	0.73	1.23	0.72	0.76	1.58	1.38	0.81	1.17	1.34	1.37	1.2	1.09
XLOC_000105	0.06	0.04	0	0	0	0	0.15	0	0.04	0.3	0.16	0.15	0.29	0.02	0.13	0.46	0.02	0.21	0.04	0.06	0.06	0.15	0.08	0.18	0.05	0.09	0.05	0.05	0.1	0.15	0.07	0.47	0.32	0.19	0.06	0.04	0.04	0.13	0.17	0.09	0.15	0.15	0.27	0.15	0.25	0.24	0.37	0.41	0.09
XLOC_000106	0	0	0	0.03	0	0.03	0.09	0	0	0.1	0	0.03	0.09	0.07	0.18	0.04	0	0.05	0	0	0.06	0	0.15	0.27	0.11	0	0	0.07	0	0.02	0.05	0.06	0	0.12	0	0.06	0.03	0.03	0.33	0	0	0.07	0.05	0.06	0.25	0.04	0.07	0.02	0.07
XLOC_000107	0	0	0	0.03	0	0	0.07	0.07	1.23	0.55	0	0.23	0.11	0.11	0.22	0.09	0.03	0	0	0	0	0	0	0	0	0	0	0	0	0	0	0	0.64	0.21	1.96	1.49	2.25	3.74	0.79	1.18	0	0	0	0	0.05	0	0	0	0
XLOC_000108	0	0.07	0.09	0.04	0.05	0.08	0.1	0.15	0.9	1.1	0.53	0.58	0.43	0.34	0.32	0.25	0.38	0.21	0.41	0.27	0.3	0.13	0.32	0.25	0.12	0.03	0.52	0.17	0.16	0.13	0.26	0.1	0.86	0.2	1.6	0.53	1.08	1.46	1.06	1.11	0.12	0.09	0.39	0.35	0.22	0.33	0.33	0.27	0.12
XLOC_000109	0	0	0	0	0	0.33	0	0	0	0	0	0.05	0	0.6	0.07	0	0	0	0	0	0	0.63	0	0	0	0	0	0	0	0.44	0	0	0	0	0.06	0	0	3.06	0.11	0	0	0	0	0.02	0	0.25	0	0	0
XLOC_000110	0.18	0.56	0.73	0.61	0.64	0.93	0.33	0.63	0.52	0.72	0.12	0.69	0.26	0.37	0.49	0.17	0.41	0.3	0.6	0.75	0.54	0.14	0.57	0.41	1.17	0.33	0.37	0.37	0	0.11	0.19	0.48	0.34	0.97	0.39	0.23	0.1	0.49	0.28	0.54	0.56	0.59	0.9	0.18	0.07	0.65	0.16	0.44	0.4
XLOC_000111	0.45	0.49	0.81	0.82	0.9	2.07	1.86	1.48	0.67	0.75	2.63	0.95	0.64	1.39	1.96	1.93	0.23	0.14	0.59	0.34	0.62	0.92	0.63	0.4	0.51	0.42	1.07	0.82	0.97	1.28	1.64	1.85	3.16	3.56	5.3	5.35	3.59	8.12	3.48	5.84	0.32	0.54	0.86	1.83	0.91	1.41	1.67	1.62	0.48
XLOC_000112	0.08	0.05	0.1	0.16	0.23	0.15	0.24	0.08	0.24	0.1	0.25	0.12	0.17	0.25	0.19	0.08	0.13	0.12	0.18	0.24	0.21	0.37	0.21	0.3	0.16	0.08	0.19	0.15	0.29	0.21	0.25	0.21	0.14	0.08	0.09	0.27	0.31	0.35	0.28	0.34	0.18	0.21	0.21	0.25	0.25	0.09	0.2	0.22	0.05
XLOC_000113	0.75	0.54	1.12	1	1.3	0.89	0.42	0.86	0.37	0.33	0.57	0.18	0.65	0.39	0.57	0.67	0.09	0.53	0.29	0.11	0.52	0	0.14	0.39	0.29	0.28	0.42	0.33	0.57	0.62	0.4	0.53	0.5	0.68	0.54	0.73	0.25	0.36	0.13	0.45	0.1	0.44	0.39	0.26	0.07	0.35	0.08	0.47	0.19
XLOC_000114	0.64	0.9	0.9	1.39	0.98	1.48	0.75	1.04	0.49	0.38	0.19	0.23	0.23	0.52	0.4	0.43	0.3	0.24	0.18	0.3	0.12	0.16	0.04	0.24	0.43	0.45	0.52	0.41	0.19	0.52	0.14	0.58	0.74	0.78	0.36	0.47	0.42	0.5	0.36	0.29	0.94	1.02	0.29	0.73	0.32	0.75	0.99	0.57	0.49
XLOC_000115	0.27	0.17	0.23	0.26	0	0.31	0.44	0.41	0.08	0.12	0.05	0.14	0.14	0.23	0.13	0.13	0.14	0.06	0.13	0.11	0.12	0.08	0.13	0.1	0.09	0.07	0.08	0.09	0.16	0.22	0.23	0.1	0.15	0.17	0.13	0.13	0.04	0.05	0.09	0.03	0.07	0.11	0.07	0.22	0.2	0.18	0.06	0.07	0.17
XLOC_000116	0	0	0	0	0	0	0	0	0.05	0	0.12	0.29	0.34	0.04	0.52	0.22	0	0	0.08	0	0.07	0	0	0.07	0.13	0	0	0	0.87	0	0	0.05	0	0	0.15	0	0	0	0	0.18	0	0	0	0	0	0	0	0	0.09
XLOC_000117	0	0	0	0	0	0	0	0	0.43	0.63	0.2	0.35	0.19	0.21	0.04	0.06	0.39	0.18	0.1	0.08	0.15	0.05	0.16	0.02	0.54	0.18	0.05	0.17	0.11	0.04	0.03	0.04	0.45	0.46	0.28	0.25	0.28	0.37	0.19	0.2	0.22	0.36	0.13	0.1	0.12	0.03	0.06	0.04	0.28
XLOC_000118	0.05	0.03	0	0	0	0	0.04	0.04	0.08	0.06	0	0.05	0.02	0.03	0.03	0	0.14	0	0.05	0.16	0	0.03	0.07	0.04	0.01	0.21	0.23	0.04	0	0.08	0.1	0	0.48	0.07	0.02	0.13	0.06	0	0.03	0.03	0.13	0.21	0.03	0.18	0.26	0.06	0	0.09	0.21
XLOC_000119	0.19	0.16	0.03	0.15	0	0.13	0.36	0.43	0	0	0	0	0.03	0	0.03	0.06	0	0	0	0	0	0	0.04	0	0	0	0	0	0	0	0	0	0	0.04	0	0	0	0	0	0	0	0	0	0	0	0	0	0	0
XLOC_000120	0.85	0.87	0.53	0.82	0.87	0.89	0.85	0.65	0.48	0.53	0.55	0.66	0.61	0.16	0.46	0.24	0.22	0.15	0.32	0.33	0.4	0.24	0.33	0.3	0.26	0.39	0.31	0.34	0.43	0.19	0.47	0.08	0.41	0.54	0.55	0.26	0.38	0.28	0.37	0.26	0.52	0.37	0.25	0.34	0.62	0.13	0.36	0.3	0.36
XLOC_000121	0	0	0	0	0	0	0	0	0	0	0	0	0	0	0	0	0	0	0	0	0	0	0	0	0	0	0	0	0	0	0	0	0	0	0	0	0	0	0	0	0	0	0	0	0	0	0	0	0
XLOC_000122	0.69	0.81	0.73	0.82	1.04	0.84	0.35	0.78	0.42	0.35	0.34	0.51	0.49	0.5	0.89	0.35	0.35	0.42	0.44	0.45	0.45	0.43	0.59	0.61	0.55	0.76	0.57	0.7	0.19	0.63	0.31	0.33	0.8	1.24	0.53	0.6	0.22	0.21	0.35	0.32	0.66	0.81	0.99	0.63	0.41	0.74	0.52	0.46	0.65
XLOC_000123	0.08	0	0	0	0.08	0	0.07	0	0.21	0.08	0	0.02	0.02	0	0.06	0.04	0.09	0.03	0	0.11	0	0	0.03	0	0	0.43	0.04	0.14	0	0.02	0	0	0	0.06	0	0	0.03	0	0.09	0	0	0	0.28	0.08	0.21	0.09	0.05	0	0
XLOC_000124	1	1.81	0.88	1.39	1.58	0.99	1.48	1.76	0.49	0.44	0.92	0.65	0.33	1.21	0.25	0.44	0.89	0.27	0.54	0.75	0.9	0.37	0.55	0.79	0.3	0.55	0.13	0.56	0.33	1.46	0.16	0.38	0.89	0.85	0.43	0.67	0.07	0.4	0.18	0	1.31	2.22	2.62	1.74	0.86	1.85	1.77	1.25	1.04
XLOC_000125	0	0.06	0	0.03	0	0.11	0	0	0.15	0.09	0.25	0.25	0.07	0.15	0.07	0	0.1	0.12	0.22	0	0.16	0.05	0.2	0.18	0.05	0	0	0.09	0.05	0	0	0.21	0	0.19	0.04	0.76	0.04	0	0.05	0	0	0.07	0.12	0	0.08	0.1	0.09	0	0
XLOC_000126	0.02	0.08	0.08	0.03	0.18	0.09	0.12	0.13	0.18	0.12	0.26	0.16	0.13	0.07	0.14	0.18	0.1	0.24	0.36	0.3	0.34	0.27	0.4	0.25	0.19	0.12	0.34	0.1	0.09	0.13	0.21	0.23	0.11	0.1	0.16	0.26	0.08	0.11	0.22	0.06	0.13	0.13	0.41	0.3	0.25	0.2	0.27	0.44	0.11
XLOC_000127	0	0	0	0	0	0	0	0	0.09	0.08	0	0.04	0.04	0.04	0	0.04	0.11	0.05	0.07	0	0.2	0.09	0.12	0	0.04	0	0.04	0.23	0	0	0	0	0.11	0.16	0	0	0	0.08	0.09	0	0.04	0.04	0.25	0.15	0.22	0	0.6	0	0.08
XLOC_000128	0.09	0.11	0.06	0.16	0.08	0.15	0.04	0.2	0.56	0.65	0.27	0.31	0.64	0.74	0.57	0.78	0.2	0.38	0.28	0.21	0.63	0.29	0.32	0.66	0.15	0.24	0.4	0.2	0.3	0.55	0.15	0.55	0.2	0.36	0.36	0.28	0.19	0.28	0.32	0.25	0.33	0.29	0.16	0.43	0.27	0.4	0.35	0.7	0.18
XLOC_000129	0	0	0	0	0	0	0	0	0.13	0.4	0.14	0.08	0.08	0.1	0.14	0.14	0.16	0.16	0.29	0.14	0.17	0.07	0.15	0.3	0.13	0.27	0.07	0.14	0.04	0.11	0.11	0.03	0.04	0.09	0.06	0.02	0.18	0.04	0.14	0.07	0.09	0.29	0.34	0.05	0.35	0.1	0.28	0.15	0.18
XLOC_000130	0	0	0	0	0	0	0	0	0	0.03	0.16	0	0.07	0	0.07	0.07	0	0	0	0	0	0	0	0	0	0	0	0	0	0	0	0	0	0	0.51	0.24	0.26	2.01	0.07	0	0	0	0	0	0	0.07	0	0	0
XLOC_000131	0.2	0.2	0.07	0.13	0.12	0.22	0.04	0.32	0.49	0.26	0.25	0.13	0.18	0.07	0.05	0.15	0.15	0.1	0.38	0.19	0.16	0.31	0.06	0.15	0.02	0.08	0.2	0.09	0.3	0.13	0.06	0.08	0.16	0.21	0.2	0.25	0.29	0.14	0.25	0.31	0.13	0.24	0.14	0.03	0.2	0.32	0.13	0.04	0.11
XLOC_000132	0	0	0	0	0	0	0	0	0.03	0.17	0	0	0	0	0.03	0	0.21	0.04	0.11	0	0.05	0	0	0	0	0.06	0	0	0.03	0	0	0	0	0	0	0	0.05	0	0.06	0	0.03	0	0	0	0	0	0	0	0.06
XLOC_000133	0	0	0	0	0.03	0	0	0	0	0.06	0	0.08	0.03	0.02	0	0.35	0.04	0	0	0.11	0.05	0	0	0.05	0	0	0.02	0	0.18	0	0	0	0	0	0	0.34	0.05	0	0	0.06	0	0	0	0	0	0	0	0.06	0.06
XLOC_000134	0.49	0.81	0.43	0.56	1.02	0.28	0.9	1.06	0.03	0.17	0.06	0.2	0.06	0.18	0.36	0.03	0.17	0.08	0	0.05	0.05	0	0.09	0.23	0	0.09	0.03	0	0	0.03	0.18	0.13	0	0.12	0	0	0.05	0.11	0	0	0.18	0.39	0.37	0.27	0	0.29	0.04	0.7	0.06
XLOC_000135	0.78	1.27	0.86	1.03	0.82	1.44	1.53	1.75	0.12	0.14	0.16	0.17	0.51	0.53	0.06	0.09	0.24	0	0.32	0.1	0.47	0.82	0.17	0.45	0.2	1.06	0.09	0.08	0.2	0.56	0.08	0.03	0.23	0.23	0.15	0.26	0.04	0.38	0	0.82	0.57	0.83	0.73	0.53	0.59	0.66	1.13	1.06	0
XLOC_000136	25.43	27.21	24.99	27.51	25.17	28.32	24.82	33.91	0.87	0.52	0.9	1.12	1.18	1.4	1.4	1.17	0.57	0.81	0.55	0.43	0.36	0.72	0.55	0.42	0.17	0.27	0.64	0.23	0.25	0.21	0.11	1	0.36	0.48	0.65	0.68	1.23	0.92	0.57	0.33	1.09	1.19	0.67	1.45	0.56	1.28	1.01	1.51	0.33
XLOC_000137	8.56	6.87	6.08	7.39	6.34	6.9	6.71	7.07	0.6	0.21	0.03	0.12	0.22	0.06	0.22	0.13	0.09	0.16	0	0.28	0.26	0.07	0	0.2	0.16	0.28	0.19	0.24	0.04	0.1	0	0.35	0.78	0.17	0.48	0.22	0.05	0.06	0.2	0.52	0.44	0.63	0.29	0.26	0.54	0.45	0.85	0.58	0.13
XLOC_000138	0	0.13	0.31	0.11	0.09	0.41	0.26	0.17	0	0.17	0.2	0.3	0	0.13	0.05	0.27	0.25	0.13	0	0.05	0.13	0	0.08	0	0	0	0	0.05	0	0.17	0.1	0	0.2	0.14	0	0	0	0	0.05	0.16	0.1	0	0	0.1	0.22	0.11	0.06	0	0.11
XLOC_000139	0.23	0.33	0.56	0.33	0.46	0.24	0	0.5	0.23	0.05	0.07	0.15	0.08	0.12	0.06	0.06	0.04	0.02	0	0	0.05	0.13	0.08	0.13	0.06	0.04	0.06	0.12	0.02	0	0.08	0.16	0.17	0	0.12	0.25	0.02	0.05	0.09	0.03	0.09	0.03	0.09	0.05	0.08	0	0	0.03	0.06
XLOC_000140	0.11	0.1	0.32	0.15	0.26	0	0.1	0	0.24	0.27	0.33	0.14	0.83	0.48	0.33	0.6	0.43	0.21	0.23	0.22	0.1	0.18	0.06	0.19	0.08	0.2	0.42	0.12	0.12	0.07	0.06	0.14	0.16	0.44	0.38	0.15	0.13	0.15	0.17	0.34	0.21	0.08	0.23	0.53	0.2	0.4	0	0.13	0.13
XLOC_000141	0.56	0.47	0.52	0.54	0.26	0.16	0.44	0.18	0.12	0.16	0.16	0.32	0.16	0.35	0.1	0.29	0.13	0.25	0.13	0.36	0.15	0.25	0.03	0.11	0.12	0.05	0.19	0.14	0.22	0.41	0	0.37	0.09	0.23	0.19	0.18	0.04	0.21	0.22	0	0.09	0.32	0.45	0.11	0.26	0.12	0.11	0.22	0.12
XLOC_000142	0	0	0	0	0	0	0	0	0.18	0.45	0.94	0.25	0	0.04	0.13	0.09	0.73	0.95	0.56	0.31	0.28	0.57	0.44	0.2	0.79	0.77	1.23	0.73	1.08	0.37	0.34	0.72	1.36	2.09	0.51	2.38	0.27	0.89	0.36	1.06	0.09	0.21	0.66	0.08	0.09	0.8	0.53	0.43	0.8
XLOC_000143	0	0	0	0	0	0	0	0	0.31	0.05	0.29	0.17	0	0	0.12	0.02	0.13	0.12	0.04	0.17	0.06	0.17	0.06	0.06	0.02	0.11	0	0.13	0	0	0	0.04	0.05	0	0.07	0	0	0	0	0.12	0.04	0	0.04	0	0	0	0.07	0	0.04
XLOC_000144	0.19	0.61	0.51	0.63	0.68	0.32	0.41	0.35	0.61	1.38	0.65	0.73	0.82	0.63	0.66	1.2	1	0.83	0.86	0.93	0.65	0.71	0.86	1.04	1.04	0.73	0.82	1.45	0.48	0.52	0.5	1.01	0.75	1	0.55	0.6	0.66	0.71	0.71	0.36	0.5	0.94	0.96	0.8	1.98	0.62	0.68	0.68	0.69
XLOC_000145	1.56	1.48	1.1	1.35	0.9	1.4	0.82	1.17	0.4	0.36	0.33	0.26	0.24	0.36	0.33	0.25	0.34	0.26	0.36	0.24	0.44	0.44	0.31	0.51	0.29	0.28	0.3	0.22	0.37	0.26	0.29	0.34	0.49	0.27	0.45	0.36	0.14	0.28	0.28	0.18	0.3	0.59	0.69	0.47	0.43	0.68	0.47	0.43	0.29
XLOC_000146	0.14	0.31	0.65	0.58	0.62	0.3	0.13	0.34	0.59	0.62	0.6	0.52	0.9	0.49	0.44	0.54	0.08	0.12	0.53	0.64	0.63	0.3	0.5	0.42	0.49	0.63	0.25	0.71	0.67	0.39	0.06	0.26	1.16	0.36	0.62	0.92	1.05	0.32	0.6	0.63	0.33	0.32	0.8	0.37	0.58	0.31	0.4	0.35	0.67
XLOC_000147	0	0	0	0	0	0	0	0	0	0	0	0	0	0	0	0	0	0	0	0	0	0	0	0	0	0	0	0	0	0	0	0	0	0	0	0	0	0	0	0	0	0	0	0	0	0	0	0	0
XLOC_000148	0.34	0.48	0.65	0.56	0.27	0.31	0.53	0.38	1.09	1.73	0.97	1.18	2.45	2.32	3.46	2.82	0.78	1.84	0.56	0.76	1.02	0.71	0.97	1.19	0.91	1.21	0.96	0.87	1.11	1.2	0.98	1	0.92	1.36	0.73	1.21	1.69	1.35	2.02	1.68	0.47	0.99	0.55	0.57	1.06	0.68	1.15	0.8	0.84
XLOC_000149	1.14	1.28	1.43	2.09	1.02	1.43	1.04	1.84	3.16	3.36	2.9	2.6	2.2	3.45	2.59	3.18	2.08	2.26	2.97	2.67	1.97	1.38	2.26	2.02	1.48	1.92	1.57	2.95	1.39	1.41	0.91	1.02	2.23	2.35	1.77	2.31	1.87	2.89	1.97	2.13	0.78	1.45	1.14	1.22	2.24	1.14	1.73	1.89	1.97
XLOC_000150	0	0.08	0	0	0.11	0	0	0	0	0	0	0.51	0	0	0.06	0	0	0	0.06	0	0	0	0	0	0	0	0	0	0.21	0	0	0	0	0	0	0	0	0	0	0	0	0	0	0	0	0	0	0	0
XLOC_000151	0	0	0	0.11	0	0.04	0	0	0.49	0.17	0.55	0.49	0.1	0.08	0.08	0.27	0.39	0.49	0.56	0.76	0.21	0.45	0.51	0.2	0.26	0.63	0.13	0.33	0.63	0.22	0.22	0.17	0.77	0.34	1.63	1.12	0.79	0.14	0	0.93	0.48	1.33	0.44	0.23	0.27	0.47	0.66	0.12	0.41
XLOC_000152	0	0	0	0	0	0	0	0	0	0	0.02	0.01	0	0	0	0	0.07	0.26	0.26	0.19	0.25	0.04	0.12	0.06	0.25	0.02	0.07	0	0.1	0.07	0.2	0.24	0.3	0.3	0	0.02	0	0	0.04	0	0.02	0.04	0.05	0.09	0	0	0	0	0.34
XLOC_000153	0.37	0.01	0.13	0.25	0.05	0.23	0.03	0.09	0.44	0.38	0.24	0.14	0.16	0.33	0.75	0.35	0.05	0.09	0.12	0.02	0.06	0.13	0.39	0.09	0.14	0.14	0	0.12	0.07	0.03	0.07	0.34	0.43	0.37	0.57	0.87	0.78	0.49	0.61	0.51	0.06	0	0	0.23	0.1	0.21	0.22	0.05	0.04
XLOC_000154	0.07	0.08	0.22	0.07	0.08	0.12	0.09	0.04	0.08	0.04	0.19	0.01	0.07	0.02	0.13	0.06	0	0.08	0	0.03	0.06	0.02	0.04	0	0	0.05	0.06	0.03	0	0.03	0.14	0	0.08	0.07	0.25	0.25	0.19	0.2	0.39	0.25	0	0	0	0	0.07	0.03	0.04	0	0
XLOC_000155	74.49	62.35	74.54	62.94	61.09	47.18	54.88	58.13	77.07	75.35	88.01	76.2	81.32	79.8	67.4	79.24	60.58	71.45	52.48	60.74	55.95	47.7	55.87	49.66	53.07	53.62	71.99	68.77	65.44	46.16	50.49	62.48	54.86	59.29	65.87	65.87	54.37	48.22	55.29	50.9	54.54	78.61	83.61	77.28	66.37	61.61	64.27	69.44	51.07
XLOC_000156	0.15	0.2	0.23	0.14	0.43	0.11	0.52	0.33	0.85	0.71	2	1.19	1.39	1.46	1.57	1.43	1.42	1.73	1.32	0.93	0.73	1.07	1.31	1.07	1.66	2.29	0.99	1.77	0.61	0.82	0.32	1.13	0.8	1.16	1.24	0.82	0.97	0.96	1.11	1.38	0.55	1.53	0.61	0.58	1.05	0.4	0.88	0.5	0.61
XLOC_000157	0.17	0	0.05	0.01	0.2	0	0.09	0.06	0.24	0.36	0.64	0.46	0.38	0.28	0.53	0.46	0.17	0.04	0.1	0.02	0.03	0	0.19	0.29	0.06	0	0.19	0.11	0.15	0.02	0.22	0.1	0.16	0.1	0.32	1.09	0.22	0.4	0.43	0.82	0.12	0.09	0.09	0.15	0.04	0.06	0.07	0.25	0.08
XLOC_000158	0	0	0.04	0	0	0	0	0	0.33	0.09	0.43	0.15	0.23	0.32	0.09	0.16	0.33	0.22	0.49	0.66	0.2	0.17	0.85	0.43	0.54	0.19	0.24	0.4	0	0.49	0.33	0.14	0.33	0.15	0.4	0.28	0.1	0.55	0.62	0.16	0.17	0.15	0.09	0.11	0.03	0.15	0.25	0	0.29
XLOC_000159	0	0	0	0	0	0	0	0	0.04	0	1.65	0.16	0.08	0.5	0.08	0	6.72	6.32	10.61	9.63	14.38	6.02	9.28	11	3.81	6.08	10.7	13.82	7.83	5.91	4.48	8.92	1.98	2.63	6.84	0.79	3.24	1.91	2.31	4.67	3.58	4.33	3.77	3.95	4.68	3.25	3.71	3.15	5.83
XLOC_000160	0	0	0	0	1.06	0	0	0	0.45	0.12	1.49	0.29	0.21	0.31	0.43	0.09	2.15	3.75	2.74	2.33	1.47	1.69	1.05	3.84	5.11	6.32	3.61	2.01	1.78	3.97	0.91	2.85	2.91	4.7	0.51	0.08	0.4	0.56	1.43	2.09	2.69	5.93	2.51	3.24	0.87	1.77	2.63	3.04	2.88
XLOC_000161	0	0	0	0	0	0	0	0	0.18	0.05	0.59	0.14	0.31	0.38	0.12	0.18	1.88	3.56	2.63	2.23	2.12	1.83	1.9	2.45	2.48	5.22	2.45	2.62	1.33	4.34	0.84	1.82	2.29	3.46	0.83	0.46	0.18	0.43	0.48	0.59	2.03	3.42	1.98	2.31	1.51	2.19	2.08	2.01	1.99
XLOC_000162	0.24	0.11	0.06	0	0	0	0	0	0	0	0	0	0	0.05	0	0	0.06	0.06	0.08	0	0	0	0	0	0	0	0.09	0	0	0.1	0	0	0	0.06	0	0	0	0	0	0	0	0	0.05	0.04	0	0	0.11	0	0
XLOC_000163	0	0	0	0	0	0	0	0	0	0	0.11	0	0	0	0	0	0.22	0.05	0.28	0.07	0	0	0.17	0.36	0	0.42	0.12	0	0.26	0	0	0	0.05	0.31	0.13	0	0	0	0	0	0	0.08	0.23	0.07	0	0.34	0	0.14	0
XLOC_000164	0	0	0	0	0	0	0	0.01	0	0	0.04	0	0	0.01	0	0.01	2.59	2.01	0.16	0.3	0.08	0.14	0.11	0.03	0.86	0.54	0	0.22	0	0	0	0	0.13	0.06	0.04	0	0.02	0	0	0	0	0	0.04	0	0	0	0	0	0.12
XLOC_000165	0	0	0	0	0	0	0.06	0	0	0	0	0.04	0	0.15	0.04	0.16	0	0.05	0	0.07	0	0	0	0.12	0	0	0	0	0	0.29	0	0.17	0.15	0	0	0	0	0.07	0.24	0.46	0	0	0	0	0	0.12	0	0.28	0
XLOC_000166	0.33	0.34	0.7	0.49	0.52	0.34	0.41	0.53	0.87	0.61	1.25	0.84	0.68	0.54	0.8	0.76	0.79	0.72	0.82	0.86	0.83	0.43	0.81	0.67	0.61	0.51	0.74	1.13	0.55	0.46	0.56	0.5	0.67	0.66	0.99	0.54	0.69	0.58	0.84	0.69	0.59	0.71	0.96	0.71	0.61	0.36	0.61	0.52	0.53
XLOC_000167	0	0	0	0	0	0	0	0	0	0	0	0	0	0	0	0	0	0	0	0	0	0	0	0	0	0	0	0	0	0	0	0	0	0	0	0	0	0	0	0	0	0	0	0	0	0	0	0	0
XLOC_000168	0	0	0	0	0	0	0	0	0	0	0	0	0	0	0	0	0	0	0	0	0	0	0	0	0	0	0	0	0	0	0	0	0	0	0	0	0	0	0	0	0	0	0	0	0	0	0	0	0
XLOC_000169	0	0	0	0	0	0	0	0	0	0	0	0	0	0	0	0	0	0	0	0	0	0	0	0	0	0	0	0	0	0	0	0	0	0	0	0	0	0	0	0	0	0	0	0	0	0	0	0	0
XLOC_000170	0.02	0.05	0	0	0	0.02	0.04	0	0.04	0.09	0.04	0.01	0.01	0	0	0	0.09	0.23	0.3	0.09	0.04	0.05	0.07	0.12	0	0.15	0.05	0.04	0.03	0.11	0.01	0	0.47	0.12	0.04	0	0.02	0	0.03	0	0.11	0.17	0.05	0.06	0.11	0.19	0.14	0.02	0.33
XLOC_000171	0.42	0.26	0.58	0.3	0.87	0	0.51	0.86	0.3	0.38	0.84	0.52	0.39	0.31	0.61	0.15	1.01	0.64	0.69	1.07	0.31	0.82	0.84	0.83	1.35	0.3	0.31	0.88	0.4	0.68	0.91	0.08	2.09	0.82	0.99	0.5	0.84	0.88	0.64	0.48	0.89	1.58	2	0.43	1.16	1.33	0.55	0.83	0.91
XLOC_000172	0.53	0.44	0.32	0.35	0.4	0.44	0.49	0.54	0.14	0.27	0.35	0.13	0.34	0.52	0.23	0.46	0.06	0.38	0.21	0.1	0.2	0.42	0.18	0.14	0.1	0.21	0.14	0.19	0.04	0.27	0.02	0.29	0.16	0.3	0.32	0.08	0.25	0.11	0.52	0.28	0.31	0.49	0.09	0.23	0.21	0.07	0.26	0.29	0.09
XLOC_000173	2.12	3.29	2.78	2.95	2.51	1.71	2.11	2.55	1.33	1.28	1.45	1.52	2.11	1.86	2.08	2.22	1.31	2.63	1.68	1.98	1.05	1.06	1.98	1.19	1.3	1.41	2.16	1.35	1.58	1.15	1.25	1.38	1.52	1.32	1.51	1.11	0.58	0.81	1.34	0.79	1.42	2.33	1.99	1.63	1.95	1.62	2.84	1.58	1.23
XLOC_000174	0.23	0.16	0.22	0	0	0	0.22	0.07	0	0	0.16	0.08	0.04	0.18	0.13	0	0.3	0.06	0	0.08	0	0	0	0	0.13	0	0	0	0	0.05	0	0	0.11	0	0	0	0	0	0	0.09	0	0.09	0	0.04	0.46	0.14	0.42	0.11	0
XLOC_000175	0	0	0	0	0	0	0	0	0	0	0	0	0	0	0	0	0	0	0	0	0	0	0	0	0	0	0	0	0	0	0	0	0	0	0	0	0	0	0	0	0	0	0	0	0	0	0	0	0
XLOC_000176	0	0	0	0.07	0	0.04	0	0.08	0.03	0.29	0.29	0.22	0	0.13	0.03	0.05	0.14	0.17	0	0.27	0.04	0	0.11	0.04	0.1	0.03	0	0.1	0.03	0.06	0.05	0	0.03	0.03	0.04	0.23	0	0	0.11	0.1	0	0	0	0.12	0.11	0.17	0	0.06	0
XLOC_000177	0.04	0.02	0.01	0.01	0.03	0.01	0	0.03	0.97	1.49	0.8	0.76	0.65	0.66	0.51	0.89	1.44	1.58	0.92	0.85	0.69	0.51	0.68	0.97	0.78	1.06	0.62	0.78	0.51	0.5	0.48	0.5	0.8	0.96	0.8	0.53	0.53	0.75	0.66	0.72	0.29	0.69	0.08	0.11	0.03	0.13	0.06	0.13	1
XLOC_000178	0	0	0	0	0	0	0	0	0.28	0.65	0.31	0.06	0.03	0.23	0.29	0.31	0.32	0.34	0	0.11	0.16	0	0	0.25	0	0.06	0.07	0.4	0	0.07	0.31	0	0.51	0	0	0.11	0.1	0	0.34	0.33	0	0.06	0	0.27	0	0	0	0	0
XLOC_000179	0	0	0.03	0	0	0	0	0	0.21	0.23	0.16	0.2	0.19	0.29	0.25	0.41	0.24	0.39	0.22	0.21	0.21	0.2	0.09	0.2	0.09	0.08	0.2	0.15	0.18	0.18	0.04	0.04	0.16	0.13	0.15	0.28	0.17	0.17	0.38	0.43	0.03	0.07	0	0.05	0	0.02	0	0	0.37
XLOC_000180	0.08	0	0	0	0	0	0.08	0	0.17	0.34	0.19	0.06	0.08	0.1	0.14	0.05	0.07	0.04	0.14	0.03	0.05	0	0.11	0.1	0.09	0.22	0.02	0.07	0.18	0.03	0	0.12	0.06	0.1	0.32	0.36	0.02	0.2	0.29	0.54	0.02	0	0.03	0.01	0.03	0.03	0	0	0.25
XLOC_000181	0.04	0.01	0.04	0	0	0.12	0.02	0.07	0.58	0.51	0.62	1.13	1.33	0.98	1.68	0.67	0.22	0.24	0.42	0.12	0.58	0.3	0.38	0.49	0.2	1.01	0.27	0.45	0.1	0.42	0.2	0.43	0.57	0.47	0.31	0.36	0.28	0.17	0.84	0.37	0.48	0.35	0.77	0.32	0.48	0.24	0.52	0.38	0.21
XLOC_000182	0.34	0.24	0.22	0.12	0.21	0.15	0.11	0.23	0.39	0.38	0.17	0.4	0.3	0.37	0.2	0.33	0.39	0.27	0.41	0.4	0.35	0.35	0.39	0.42	0.36	0.23	0.47	0.5	0.13	0.33	0.19	0.32	0.37	0.24	0.22	0.19	0.47	0.3	0.17	0.15	0.2	0.34	0.23	0.31	0.27	0.18	0.42	0.14	0.23
XLOC_000183	0.11	0.15	0.28	0.13	0.24	0.12	0.13	0.1	0.42	0.3	0.92	0.38	0.8	1.19	0.36	0.66	0.38	0.11	0.35	0.19	0.26	0.33	0.11	0.29	0.26	0.29	0.64	0.29	0.51	0.39	0.09	0.23	0.34	0.24	0.44	0.27	0.31	0.36	0.49	0.31	0.11	0.16	0.27	0.11	0.41	0.16	0.05	0.18	0.22
XLOC_000184	2.64	1.58	2.07	1.76	2.31	1.41	1.57	1.57	1.56	1.24	1.14	1.42	1.16	0.99	0.85	0.8	1.41	1.36	1.26	1.31	1.55	1.17	1.33	1.33	1.7	1.61	2.25	1.99	2.5	1.47	1.35	2.19	0.73	1.07	1.13	1.08	1.35	0.87	1.03	0.36	1.41	0.84	1.39	0.98	1.48	1.05	0.93	0.76	1.23
XLOC_000185	6.73	4.21	1.93	4.23	6.18	5.17	6.85	2.68	6.16	3.55	1.16	4.94	3.6	4.38	4.45	3.03	5.68	3.02	0.67	3.3	3.99	4.38	3.21	1.88	7.39	5.45	1.83	4.82	6.97	7.75	5.42	4.15	5.42	3.48	1.43	4.88	5.81	6.15	3.85	2.09	5.44	1.58	0.86	4.12	5.77	4.47	2.96	2.4	6.03
XLOC_000186	1.61	469.35	80.67	2.25	0.86	1.59	3.08	1.42	2.43	1145.31	505.35	3.6	1.04	2.78	2.24	2.18	2.13	853.75	459.44	2.77	1.5	2.52	2.67	2.16	2.63	1270.1	481.17	3.89	2.67	3.65	4.39	3.98	2.26	446.14	427.92	3.06	2.18	3.47	1.55	2.49	0.96	504.94	136.08	1.35	0.74	0.75	0.75	1.43	2.65
XLOC_000187	1.39	2.15	6.33	3.06	2.48	1.95	3.2	3.39	0.49	0.21	1.02	0.62	0.49	1.03	1.13	1.13	0.5	0.31	0.48	0.68	0.55	0.21	0.83	0.93	0.56	0.41	1.1	1.13	0.3	0.73	0.7	0.59	0.54	1.48	1.51	0.72	0.75	0.86	0.86	0.98	1.13	1.38	2.49	2.26	2.58	1.78	1.54	2.21	0.29
XLOC_000188	0.97	0.45	1.23	0.47	0.51	0.71	0.34	0.66	0.09	0.12	0.04	0.59	0.24	0.84	0.33	0.34	0.06	0.05	0	0.22	0.2	0.27	0	0.26	0.46	0.2	0.46	0.54	0.28	0.44	0.2	0.23	0.22	0.17	0.35	0	0	0.08	0.26	0.08	0.16	0	1.54	0.41	0.62	0.13	0.96	0.51	0.17
XLOC_000189	0.17	0.27	0.26	0.52	0.32	0.49	0.21	0.15	0.17	0.69	1.2	0.45	0.48	0.77	0.69	0.78	0.48	0.99	0.84	1.03	0.72	0.68	0.58	1.19	0.39	0.51	0.76	1.8	1.13	0.83	0.74	0.67	0.5	0.24	0.74	0.32	0.45	0.38	0.27	0.67	0.29	0.8	0.72	0.78	0.92	0.92	0.4	0.81	0.93
XLOC_000190	0.12	0.21	0.04	0.08	0.08	0.05	0.18	0.15	0.18	0.34	0.31	0.29	0.22	0.56	0.37	0.15	0.05	0.1	0.05	0.09	0.11	0.24	0.25	0.1	0.2	0.1	0.13	0.19	0.18	0.24	0.24	0.05	0.13	0.18	0.07	0.49	0.06	0.11	0.14	0.04	0.07	0.17	0.28	0.3	0.35	0.38	0.56	0.16	0.09
XLOC_000191	0.69	0.55	0.35	0.53	0.59	0.77	0.59	0.64	0.34	0.64	0.43	0.15	0.45	0.43	0.41	0.49	0.16	0.17	0.2	0.08	0.38	0.17	0.3	0.31	0.47	0.41	0.17	0.18	0.1	0.48	0.06	0.28	0.26	0.84	0.45	0.3	0.36	0.23	0.7	1.32	0.21	0.27	0.25	0.15	0.41	0.52	0.42	0.52	0.2
XLOC_000192	0	0	0	0.03	0	0	0	0	0.12	0.04	0	0.24	0.04	0	0	0.12	0.22	0	0.16	0.2	0.26	0	0.06	0.1	0.07	0.02	0.07	0.36	0	0.15	0.26	0.02	0.12	0.06	0	0	0.14	0.17	0	0	0	0	0.23	0	0.02	0	0	0.06	0.69
XLOC_000193	0.22	0.03	0.04	0.02	0	0.05	0.06	0.07	0.09	0.05	0.29	0.06	0.04	0.1	0.05	0.31	0	0	0.05	0.06	0.02	0.02	0.01	0.03	0	0	0.14	0	0.02	0.08	0.12	0.19	0.46	0.12	0.73	0.23	0.18	0.54	0.17	0.94	0	0	0.15	0.07	0.03	0.06	0.14	0.24	0
XLOC_000194	0.21	0.06	0.27	0.13	0.1	0.24	0.07	0.42	0.51	0.23	1.33	0.43	0.18	0.62	0.33	1.48	0.08	0.04	0.29	0.02	0.21	0.27	0.17	0.36	0.08	0.15	0.39	0.11	0.09	0.3	0.16	0.42	1.01	0.7	5.6	1.93	1.26	4.09	0.97	4.03	0.31	0.05	0.47	0.21	0.05	0.22	0.31	0.56	0.1
XLOC_000195	0	0.1	0.06	0	0	0	0.05	0	0.03	0	0.08	0.03	0	0.02	0.02	0.03	0.02	0	0.15	0.06	0.16	0.04	0.09	0.13	0.03	0	0.18	0	0.17	0.02	0.19	0.04	0.09	0.09	0	0	0.05	0	0.1	0.03	0	0	0.05	0.06	0.05	0.2	0.04	0.1	0.03
XLOC_000196	0.15	0.05	0.1	0	0.08	0	0	0.09	0.04	0.02	0.15	0	0.05	0.09	0.08	0.04	0.18	0.08	0.19	0.03	0.26	0.08	0.31	0.17	0.14	0.1	0.32	0.09	0.01	0.02	0	0.05	0.1	0.19	0.16	0	0	0.16	0.02	0.08	0.15	0.05	0.21	0.07	0.1	0.02	0.06	0.08	0.15
XLOC_000197	0.12	0.06	0.15	0.06	0.44	0.07	0.15	0.11	0.02	0.24	0.06	0	0.04	0.02	0.11	0	0.25	0.35	0.17	0.36	0.15	0	0.33	0.53	0.14	0.18	0.11	0.38	0.15	0.05	0.18	0.28	0.12	0	0.04	0.04	0	0.04	0.09	0	0.34	0.16	0.05	0.04	0.19	0.07	0.33	0.31	0
XLOC_000198	0	0	0	0	0.33	0.07	0.08	0.15	0.29	0	0.06	0.24	0.13	0	0.09	0.22	0.03	0.06	0.17	0.12	0.08	0.1	0.13	0	0.28	0.09	0	0.04	0.26	0.07	0.16	0.08	0	0	0	0	0.39	0	0.05	0	0.09	0.05	0.02	0.25	0.42	0.02	0.11	0.08	0.23
XLOC_000199	0.9	1.16	0.85	1.01	1.36	0.61	1.06	1.06	0.3	0.38	0.54	0.55	0.68	0.7	0.7	0.28	0.4	0.59	0.62	0.45	0.24	0.33	0.2	0.29	0.22	0.42	0.26	0.37	0.26	0.77	0.31	0.52	0.73	0.76	0.67	0.23	0.31	0.46	0.45	0.3	0.85	0.65	0.65	0.56	0.56	0.52	0.22	0.58	0.22
XLOC_000200	0	0	0	0.01	0.01	0.02	0.01	0	0.73	0.38	0.41	0.46	1.11	0.83	0.76	0.91	0.25	0.25	0.57	0.28	1.03	0.46	0.59	0.39	0.28	0.12	0.38	0.29	0.65	0.45	0.3	0.48	0.28	0.21	0.21	0.31	0.41	0.11	0.61	0.29	0.15	0.06	0.04	0.14	0.28	0.12	0.26	0.14	0.28
XLOC_000201	0.16	0	0.24	0.39	0.22	0.28	0	0.24	0.13	0	0.03	0.09	0.21	0.12	0.21	0.32	0	0	0.17	0	0	0.13	0.04	0	0.52	0	0.06	0	0.03	0	0.44	0.2	0.08	0.89	0.72	0.75	1.46	0.74	0.51	1.42	0	0	0	0.11	0	0	0.45	0	0
XLOC_000202	0.07	0.08	0.31	0.15	0.28	0.41	0.39	0.42	0.35	0.02	0.05	0	0.04	0.08	0.07	0.03	0.24	0.1	0.17	0.09	0.19	0.14	0.28	0.06	0.08	0.06	0.09	0.02	0.09	0.07	0.03	0.2	0.07	0	0.2	0.02	0.04	0	0.16	0	0.08	0.19	0.15	0.1	0.1	0.3	0.13	0.18	0.08
XLOC_000203	0.17	0	0.12	0.1	0	0.04	0	0.07	0.07	0.11	0	0	0.05	0	0.07	0.02	0.13	0.18	0	0.21	0.19	0.1	0.1	0.04	0.02	0.14	0	0.18	0	0	0.05	0	0.12	0.41	0	0.17	0.04	0	0.1	0.05	0.35	0.05	0.05	0.04	0	0.08	0.06	0.03	0
XLOC_000204	0.43	0.49	0.22	0.38	0.13	0.14	0.16	0.29	0.74	0.45	0.64	0.95	0.67	1.01	0.39	0.46	0.39	0.31	0.14	0.48	0.22	0.35	0.38	0.29	0.36	0.17	0.36	0.43	0.14	0.31	0.24	0.16	0.25	0.3	0.28	0.43	0.32	0.35	0.47	0.39	0.15	0.27	0.09	0.12	0.23	0.16	0.35	0.1	0.4
XLOC_000205	0.8	0.69	0.57	1.03	0.73	1.01	0.86	0.89	0.4	0.42	0.44	0.52	0.45	0.46	0.29	0.47	0.24	0.31	0.32	0.28	0.24	0.29	0.31	0.3	0.28	0.46	0.21	0.27	0.27	0.24	0.32	0.31	0.39	0.58	0.42	0.52	0.47	0.31	0.19	0.45	0.26	0.38	0.29	0.39	0.32	0.34	0.27	0.21	0.18
XLOC_000206	0.91	1.41	0.87	1.37	1.54	1.64	1.72	1.41	0.85	0.77	1.04	1.25	0.99	1.13	1	0.91	0.38	0.82	0.36	0.78	0.37	0.3	0.55	0.59	0.62	0.89	0.48	0.47	0.63	0.72	0.31	0.54	1.51	0.9	0.8	0.83	0.61	0.91	0.92	0.53	0.77	0.87	0.09	0.61	0.39	0.73	0.41	0.32	0.62
XLOC_000207	2.38	2.46	2.31	3.97	2.78	3.61	2.61	3.7	1.8	2.28	1.97	2.57	2.52	2.66	2.66	2.21	0.98	1.69	0.97	1.25	0.92	1.01	0.9	1.51	1.1	1.21	0.81	0.87	1.21	0.96	0.75	1.27	1.75	2.15	1.13	2.11	1.59	1.57	1.93	1.93	1.52	1.18	1.05	1.19	0.87	1.56	0.86	1.28	1.13
XLOC_000208	3.76	3.61	3.68	5.36	3.22	5.82	3.66	5.34	3.39	3.59	3.71	3.54	3.92	5.19	3.82	3.98	1.79	2.37	1.37	1.66	1.23	1.92	0.84	1.5	3.04	2.95	1.35	1.48	1.56	2.56	2.23	1.66	5.26	5.74	2.91	10.57	2.63	4.66	2.64	3.95	2.39	1.96	1.2	2.36	1.79	1.03	1.75	2.22	2.27
XLOC_000209	0.12	0.27	0.2	0.37	0.64	0.24	0.69	0.08	0.18	0.28	0.18	0.33	0.12	0.21	0.43	0.32	0.62	0.6	0.5	0.36	0.2	0.68	0.64	0.61	0.71	0.27	0.52	0.29	0.21	0.37	0.38	0.11	0.74	0.09	0.29	0.09	0.29	0.35	0.5	0.35	0.55	0.68	0.47	0.5	0.64	0.26	0.7	0.13	0.46
XLOC_000210	0	0	0	0	0.24	0	0	0.09	0.11	0.13	0.08	0.1	0.08	0	0.27	0.03	0	0	0	0	0	0	0	0	0	0	0	0.03	0	0	0	0	0	0.07	0.18	0.14	0.21	0	0.11	0.16	0	0	0	0	0	0	0	0	0
XLOC_000211	0.22	0.15	0.1	0.06	0.21	0.06	0	0.16	0	0.17	0.19	0.15	0	0.12	0	0.02	0.11	0.03	0.18	0	0.03	0	0	0.06	0.04	0.06	0.02	0.11	0.23	0.04	0.02	0	0.16	0	0.27	0.35	0.06	0.07	0	0	0.36	0	0.08	0.04	0.11	0.17	0.1	0.25	0
XLOC_000212	0	0.01	0	0	0	0	0	0	0	0.03	0.25	0	0	0	0	0	1.12	0.96	0.33	0.7	0.83	0.38	0.55	0.41	0.91	0.05	0	0	0.06	0.06	0.33	0.22	0.83	0.17	0.01	0.04	0	0.15	0	0	0.02	0	0	0.16	0.02	0	0	0.02	0.89
XLOC_000213	0	0.16	0.19	0.37	0	0.14	0.09	0.09	0.12	0.16	0.22	0.09	0.07	0.06	0.13	0.08	0.26	0.09	0.17	0.29	0.06	0	0.18	0.11	0.19	0.05	0.39	0.29	0.66	0.49	0.2	0.14	0.02	0.15	0.53	0.26	0.09	0.14	0	0.19	0.18	0.18	0.3	0.27	0.31	0.16	0.07	0.11	0.34
XLOC_000214	0	0	0.05	0	0	0	0.26	0	0.08	0	0	0.07	0.04	0.2	0	0.08	0	0	0	0	0.06	0.08	0	0.06	0	0.34	0.04	0.15	0	0.12	0.45	0.21	0.15	0	0	0.82	0.18	1.08	0	0	0	0	0.39	0.32	0.29	0	0.19	0	0
XLOC_000215	8.3	10.02	6.6	8.67	7.7	8.72	9.28	8.65	8.22	10.42	9.39	11.89	10.26	11.8	9.74	11.29	10.71	15	10.68	12.3	10.14	11.44	9.31	12.94	8.19	11.11	6.99	11.36	7.25	7.37	10.59	7.04	9.01	14.07	7.46	9.7	9.16	11.54	11.17	11.34	8.66	11.06	7.7	13.79	8.22	10.08	10.46	10.44	9.67
XLOC_000216	4.2	5.9	3.79	4.58	3.51	4.68	4.58	3.78	2.77	3.47	3.81	4.06	3.76	4.61	3.02	4.66	4.41	4.79	4.24	4.48	3.09	4.53	3.94	5.67	2.25	3.56	3.14	3.46	1.8	2.66	3.04	2.37	2.88	3.38	1.85	3.64	2.46	2.95	3.27	2.61	3	3.97	3.05	4.21	2.18	2.38	3.53	3.35	3.67
XLOC_000217	1.43	2.03	1.98	1.28	1.41	1.94	1.34	0.94	0.9	1	0.86	0.7	1.74	2	1.19	1.01	0.67	1.32	0.79	0.66	0.84	0.34	0.74	0.19	0.69	1.09	0.93	0.76	0.38	0.7	0.3	0.48	0.79	0.93	0.29	0.69	0.36	0.55	0.42	0.47	1.34	1.11	1.56	1.3	1.68	2.08	0.65	0.91	0.73
XLOC_000218	0.05	0.13	0.04	0.23	0.67	0	0.13	0.39	0.34	0.08	0.03	0.1	0.32	0.11	0.08	0.23	0.45	0.24	0	0.14	0.22	0.41	0.08	0.17	0.08	0.08	0.22	0.03	0.21	0.49	0.05	0.06	0.78	0.14	0.05	0.05	0.13	0.1	0.28	0.55	0.51	0.13	0.05	0.42	0.03	0.18	0.2	0.17	0.38
XLOC_000219	3.15	3.64	3.92	3.88	3.73	3.68	4.13	3.17	2.93	3.38	2.92	4.31	4.27	4.37	3.4	3.66	4.36	5.02	3.72	3.75	4.13	3.65	4.28	4.05	2.49	2.82	3.58	4.2	4.13	2.7	4.26	3.27	2.21	3.68	2.64	3.68	2.3	3.13	4.33	2.65	3.4	4.06	2.54	2.86	2.73	2.67	3.31	3.39	3.62
XLOC_000220	0.13	0.25	0.1	0.6	0.13	0.31	0.12	0.21	0.17	0.09	0.09	0.14	0.14	0.13	0.07	0.27	0.08	0.09	0.17	0.19	0.15	0.12	0.11	0.17	0.04	0.16	0	0.14	0.04	0.04	0	0.06	0.05	0.02	0.22	0.19	0	0.27	0.12	0.11	0.15	0	0	0.15	0.55	0.14	0.11	0	0.11
XLOC_000221	1	1.11	0.67	1.05	1.9	1.67	0.73	0.81	0.72	1.09	0.61	1.58	1.67	0.96	0.57	0.79	0.6	0.69	0.66	0.82	1.86	0.61	0.77	0.51	0.71	0.93	0.58	1.17	1.2	0.64	0.86	0.42	0.59	1.01	0.6	0.82	1.15	0.76	0.87	0.49	0.66	0.9	0.53	1.46	1.7	0.9	0.86	0.82	0.97
XLOC_000222	0.14	0.26	0.15	0.34	0.29	0.23	0.21	0.14	0.21	0.23	0.02	0.26	0.17	0.23	0.06	0.07	0.03	0.1	0.09	0.02	0.04	0.03	0.05	0.08	0.18	0.12	0.14	0.11	0	0.09	0.06	0.01	0.02	0.15	0.08	0.09	0.04	0.14	0.08	0.1	0.19	0.06	0.38	0.52	0.17	0.19	0.12	0.12	0.18
XLOC_000223	0.26	0.21	0	0.33	0.25	0.04	0.05	0.27	0.18	0.35	0.13	0.52	0.08	0.15	0.09	0.15	0.04	0.22	0.1	0.15	0	0.31	0.2	0.09	0.06	0.23	0.06	0.29	1.06	0.18	0	0	0	0.19	0.05	0.25	0.04	0.16	0.12	0.06	0.06	0	0.06	0.26	0.09	0.03	0	0.14	0.12
XLOC_000224	0.42	0.65	0.41	0.44	0.49	0.5	0.49	0.7	0.19	0.19	0.23	0.21	0.19	0.31	0.11	0.21	0.14	0.27	0.12	0.16	0.1	0.23	0.27	0.16	0.14	0.21	0.1	0.17	0.1	0.15	0.14	0.3	0.16	0.2	0.18	0.13	0.15	0.11	0.23	0.14	0.12	0.31	0.26	0.51	0.19	0.18	0.38	0.3	0.12
XLOC_000225	0.42	0.28	0.22	0.4	0.93	0.38	0.73	1.07	0.86	0.49	0.81	0.72	0.62	0.43	0.4	1.19	0.5	0.34	0.61	0.64	0.83	0.48	0.5	0.89	0.77	0.5	0.63	0.72	1.1	0.28	0.77	1.15	1.1	0.67	1.1	0.72	0.74	0.63	0.36	1.46	0.79	0.53	0.93	1.14	1.34	0.87	0.5	1.76	0.64
XLOC_000226	5.92	7.61	4.92	4.84	3.88	4.84	4.75	5.11	3.4	4.09	3.51	3.09	3.25	3.56	2.79	3.66	4.42	4.12	4.8	4.67	4.63	3.92	4.37	4.59	3.38	3.09	2.97	3.77	1.75	2.26	2.63	2.6	3.19	4.23	2.89	2.95	3.27	3.9	3.71	2.94	4.44	4.75	3.5	3.24	3.05	3.73	4.11	4.03	3.83
XLOC_000227	2.49	1.95	4.05	3.31	1.58	3.17	2.26	4.89	1.97	2.16	3.25	1.37	1.51	2.4	1.79	2.82	2.17	2.62	3.3	2.79	0.75	2.99	1.76	2.36	2.39	1.79	3.67	3.01	0.74	2.64	1.71	2.39	1.89	1.64	2.47	1.47	0.82	2.21	1.69	2.69	3.1	2.53	5.73	3.7	1.9	4.05	4.07	4	1.73
XLOC_000228	0.54	0.49	0.56	0.61	0.38	0.38	0.36	0.72	0.05	0.09	0.09	0.05	0.06	0.16	0.06	0.09	0	0.07	0.04	0.01	0.09	0.05	0	0.07	0.11	0.01	0.04	0.03	0.06	0.01	0.08	0.09	0.05	0.06	0.06	0.03	0.11	0.24	0.03	0.06	0.03	0.02	0.09	0.01	0.13	0.03	0	0.03	0.1
XLOC_000229	0.4	0.59	0.51	0.31	0.59	0.36	0.75	0.51	0.3	0.54	0.43	0.51	0.27	0.46	0.32	0.33	0.27	0.35	0.27	0.23	0.18	0.26	0.26	0.3	0.13	0.37	0.22	0.21	0.42	0.15	0.16	0.18	0.16	0.25	0.13	0.08	0.17	0.19	0.23	0.21	0.21	0.22	0.1	0.1	0.27	0.07	0.15	0.22	0.09
XLOC_000230	0.44	0.61	0.23	0.48	0.4	0.86	0.33	0.39	0.41	0.48	0.19	0.23	0.3	0.41	0.21	0.1	0.34	0.29	0.37	0.33	0.44	0.29	0.35	0.29	0.39	0.34	0.27	0.25	0.14	0.3	0.31	0.53	0.16	0.34	0.07	0.33	0.27	0.3	0.56	0.41	0.33	0.65	0.35	0.41	0.42	0.15	0.36	0.21	0.27
XLOC_000231	0	0	0.12	0.15	0.28	0.14	0.62	0.25	0.04	0	0	0	0.02	0.09	0	0	0	0	0.03	0.12	0	0.08	0	0	0	0	0	0	0	0	0	0	0	0	0.15	0	0.14	0	0	0	0	0	0	0	0	0.06	0	0	0
XLOC_000232	0	0.03	0	0.18	0	0.08	0.38	0.52	0	0	0	0	0	0	0	0	0	0	0	0	0	0	0	0.04	0	0	0	0	0	0	0	0	0	0	0	0	0	0	0	0.05	0	0.02	0	0	0	0	0	0	0
XLOC_000233	0.36	0.07	0.26	0.2	0.51	0.27	0.05	0.5	0.21	0.16	0.13	0.49	0.08	0.12	0.03	0.18	0	0.04	0	0.1	0.05	0.13	0.08	0.13	0	0	0.03	0.03	0	0.06	0	0.03	0	0	0.29	0.25	0.13	0.32	0.06	0.12	0	0	0	0.1	0.15	0.34	0	0.18	0.06
XLOC_000234	0.27	0.3	0.21	0.27	0.08	0.37	0.32	0.17	0.14	0.1	0.18	0.28	0.1	0.05	0.05	0.06	0.07	0.08	0.02	0.22	0.23	0.14	0.09	0.07	0.03	0.21	0.02	0.03	0.02	0.03	0.22	0.18	0.03	0.21	0.2	0.3	0.07	0.14	0.07	0.07	0.08	0.06	0.09	0.29	0.06	0.19	0.16	0.13	0.04
XLOC_000235	5.64	6.78	6.67	6.74	6.74	6.71	6.97	6.48	5.13	5.88	5.6	5.42	6.71	6.94	5.56	6.15	4.6	5.98	5.94	5.11	5.31	5.36	5.99	4.98	4.76	4.66	5.03	5.17	5.6	4.71	6.02	4.98	3.83	4.51	4.99	3.62	4.39	3.87	4.84	3.63	4.48	5.7	6.28	5.12	5.17	5.13	5.15	5.3	4.48
XLOC_000236	0.52	0.73	0.43	0.52	0.51	0.37	0.45	0.39	0.78	0.76	0.63	0.7	0.39	0.43	0.37	0.54	0.8	0.54	0.56	0.53	0.71	0.63	0.54	0.63	0.55	0.61	0.54	0.76	0.93	0.94	0.65	0.7	0.73	0.57	0.47	0.52	0.52	0.68	0.85	0.88	0.46	0.58	0.61	0.42	0.53	0.76	0.63	0.57	0.51
XLOC_000237	0.17	0.25	0.13	0.41	0.12	0.08	0.29	0.24	0.45	0.23	0.61	0.53	0.32	0.15	0.44	0.27	0.25	0.17	0.35	0.36	0.15	0.11	0.24	0.24	0.33	0.16	0.42	0.24	0.08	0.07	0.22	0.17	0.3	0.25	0.24	0.37	0.16	0.04	0.16	0.15	0.24	0.24	0.18	0.15	0.15	0.13	0.29	0.1	0.08
XLOC_000238	0	0.13	0	0	0	0	0.07	0	0.02	0.04	0	0.02	0	0.11	0.02	0.04	0	0	0	0	0	0.05	0.06	0.39	0	0	0	0	0	0.16	0	0.05	0	0	0.04	0	0	0	0.04	0	0	0	0.11	0	0	0	0.1	0	0
XLOC_000239	1.37	2.06	2.51	1.92	1.07	1.48	1.86	2.31	1.53	2.04	2.07	2.65	2.22	5.11	3.68	4.05	0.62	0.38	0.88	0.91	0.82	0.91	1.24	1.76	0.47	0.82	0.68	0.53	0.45	1.39	0.57	1.11	1.17	1.2	1.98	1.03	1.07	0.93	2.2	1.23	1.35	1.17	1.92	1.25	0.74	2.12	2.85	1.07	0.63
XLOC_000240	0.24	0.18	0.01	0.11	0.23	0.15	0.13	0.21	0.07	0.21	0.32	0.19	0.16	0.18	0.44	0.15	0	0.06	0.07	0.1	0.06	0.06	0.2	0.22	0.02	0.04	0.14	0.2	0.18	0.15	0.21	0.29	0.04	0.21	0.25	0.12	0.12	0.25	0.38	0.23	0.02	0.06	0.13	0.11	0.25	0.31	0.13	0.15	0.1
XLOC_000241	0.11	0.05	0.03	0.04	0.13	0.28	0.23	0.38	0.84	0.52	1.19	0.45	0.23	0.28	0.63	0.81	0.44	0.44	1.29	1.8	1.1	1.89	2.56	1.48	1	0.44	0.95	0.56	1.32	1.25	1.69	1.86	0.97	1.05	1.07	1.16	0.51	1.46	1.08	0.77	0.93	0.36	0.49	0.75	0.61	0.95	0.71	0.4	0.44
XLOC_000242	0.4	0.16	0.2	0.25	0.28	0.31	0.11	0.11	0.21	0.25	0.19	0.15	0.61	0.34	0.11	0.26	0.34	0.66	0.53	0.94	0.51	0.29	0.99	1.2	0.9	0.81	0.36	0.44	0.43	0.45	0.39	0.3	0.32	0.65	0.15	0.39	0.62	0.17	0.28	0.23	0.27	0.66	0.54	0.12	0.45	0.72	0.63	0.98	0.23
XLOC_000243	0.22	0.25	0.2	0.27	0.41	0.17	0.2	0.2	0.16	0.49	0.22	0.3	0.28	0.1	0.29	0.46	0.53	1.18	0.08	0.67	0.83	0.93	0.67	0.95	0.51	0.38	0.63	0.81	0.37	0.62	0.33	0.46	0.43	0.73	0.42	0.19	0.4	0.23	0.2	0.22	0.27	0.46	0.24	0.37	0.72	0.48	0.55	0.6	0.59
XLOC_000244	0	0	0	0	0	0	0	0	0	0	0	0	0	0	0	0	0	0	0	0	0	0	0	0	0	0	0	0	0	0	0	0	0.83	0	0	0	0	0	0	0	0	0	0	0	0	0	0	0	0
XLOC_000245	0	0	0	0	0	0	0	0	0	0	0	0	0	0	0	0	0	0	0	0	0	0	0	0	0	0	0	0	0	0	0	0	0	0	0	0	0	0	0	0	0	0	0	0	0	0	0	0	0
XLOC_000246	0.08	0	0.06	0	0.12	0.03	0.11	0.03	0.02	0.02	0	0.04	0	0.07	0	0.02	0	0.06	0	0	0	0	0	0	0.02	0.04	0.04	0	0.12	0	0.02	0	0.06	0	0.04	0	0	0	0.05	0	0.04	0.56	0.02	0.08	0	0.02	0.03	0.03	0
XLOC_000247	1.58	1.86	1.39	1.59	1.68	2.26	2.2	2.39	0.86	1.21	0.99	1.17	1.36	1.95	0.85	1.24	0.94	1.5	1.19	1.58	1.28	2.04	1.63	1.95	1.63	1.11	1.51	1.66	0.7	1.65	1.63	1.95	1.61	1.42	0.86	0.68	0.89	1.55	1.35	1.11	2.61	2.41	2.7	2.76	2.25	2.76	2.3	2.57	1.5
XLOC_000248	0.05	0.19	0	0.09	0.03	0	0	0.15	0.02	0.03	0.07	0	0	0	0	0.06	0.04	0	0.03	0.08	0	0	0.07	0	0.06	0	0	0	0	0	0	0	0.08	0	0	0	0	0	0	0	0	0	0.03	0	0	0	0	0.04	0
XLOC_000249	1.05	1.57	1.51	1.07	1.31	0.8	1.13	1.44	0.94	1.5	0.91	1.36	1.78	1.55	1.6	1.43	0.7	0.61	0.97	0.75	0.76	0.94	1.17	0.88	0.84	0.81	0.69	0.71	0.81	0.85	0.5	0.74	0.99	0.72	1.44	0.77	1.42	1.24	2.05	1.39	1.05	0.99	0.66	0.81	0.52	0.63	0.87	1.13	0.46
XLOC_000250	4.59	5.07	3.61	4.7	4.13	4.84	4.31	4.84	3.49	3.9	3.46	3.56	4.26	3.92	5.02	4.13	2.95	3.52	2.04	3.41	2.5	2.67	3.25	3.21	2.67	3.25	2.92	2.72	1.94	2.7	3.01	3.91	2.92	4.27	3.27	3.64	2.25	3.63	3.98	2.82	3.45	3.06	3.6	3.57	3.09	2.64	3.07	3.06	2.61
XLOC_000251	11.27	11.38	11.03	10.44	12.02	11.23	13.54	11.94	22.24	22.06	21.11	18.93	19.19	18.8	22.54	20.36	20.48	20.1	18.36	16.63	19.53	17.89	23.99	19.29	16.61	16.98	17.01	15.32	20.4	15.15	20.57	16.76	16.21	15.37	15.91	11.53	15.59	11.69	19.43	15.19	16.88	18.24	18.39	15.49	17.21	15.82	20.28	18.14	18.38
XLOC_000252	0	0	0	0.05	0	0	0.03	0	0.02	0.23	0.07	0	0.06	0.06	0.08	0.02	0	0	0.07	0	0.06	0.12	0.08	0	0.1	0	0.19	0.05	0	0.1	0	0	0.02	0.03	0.35	0.3	0.15	0.04	0.24	0.08	0.04	0	0	0	0	0.2	0.09	0	0.04
XLOC_000253	0	0	0.04	0.07	0	0.05	0.06	0.02	0.04	0.13	0.28	0.13	0.12	0.15	0.06	0.23	0.3	0.32	0.67	0.16	0.22	0.08	0.36	0.21	0.09	0.16	0.1	0.17	0.15	0.05	0.01	0.05	0.07	0.24	0.12	0.4	0.05	0.04	0.05	0.35	0.02	0.02	0	0.02	0.12	0	0.03	0	0.14
XLOC_000254	1.44	2.04	1.61	1.8	2.11	2.47	2.69	2.03	2.58	2	2.31	2.16	1.64	1.79	2.67	1.93	2.49	2.36	2.33	2.02	1.14	1.46	2.48	2.26	2.16	1.79	1.87	2.48	1.56	1.12	2.7	1.74	1.88	1.7	2.59	1.81	2.06	2.5	3.04	2.42	1.77	1.86	2.14	1.59	1.49	1.44	2.95	1.72	1.73
XLOC_000255	0.2	0.39	0.35	0.39	0.37	0.3	0.32	0.33	0.56	0.64	0.31	0.37	0.31	0.34	0.14	0.33	0.47	0.27	0.47	0.53	0.5	0.56	0.41	0.25	0.13	0.09	0.29	0.43	0.11	0.38	0.26	0.49	0.23	0.45	0.75	0.65	0.37	0.36	0.4	0.78	0.54	0.49	0.27	0.35	0.22	0.12	0.43	0.25	0.19
XLOC_000256	0	0	0	0	0	0	0	0	0	0.04	0.3	0	0.12	0	0	0	0	0	0.07	0.07	0	0	0	0.37	0	0	0.04	0	0	0.04	0	0	0.1	0	0	0	0	0	0	0	0	0	0	0	0	0	0	0	0
XLOC_000257	0.13	0	0.05	0	0.26	0.06	0	0	0.15	0.21	0.14	0	0.04	0	0	0	0	0	0.13	0	0.06	0.08	0	0	0	0.07	0.04	0	0.04	0	0	0.08	0.14	0	0	0	0.17	0	0.3	0	0.04	0	0	0.07	0	0	0.44	0	0
XLOC_000258	0.1	0.03	0.02	0	0.02	0.04	0.19	0.04	0.66	0.17	0.15	0.09	0.08	0.06	0.21	0.15	0	0.02	0.13	0.1	0.07	0	0.16	0.15	0.17	0	0.04	0.17	0.17	0.14	0.05	0.22	0.18	0	0.14	0.05	0.2	0.13	0.29	0.23	0	0.14	0.07	0.1	0.11	0.17	0.1	0.09	0.06
XLOC_000259	0.32	0.05	0.39	0.42	0.36	0.59	0.54	0.26	5.07	4.94	8.19	3.86	2.59	2.35	2.8	2.35	3.81	1.98	2.54	2.73	3.22	2.22	3.93	4.23	3.13	1.78	3.17	3.42	3.07	3.36	3.32	2	2.82	2.4	4.83	4.53	6.75	7.68	5.05	8.88	2.07	0.99	3.13	1.56	3.75	1.86	2.83	1.24	2.17
XLOC_000260	0.04	0.05	0.05	0.02	0.08	0.03	0.36	0.05	1.76	1.71	2.27	2.04	2.99	4	1.5	2.25	0.76	0.46	0.23	0.4	0.29	0.39	0.18	0.4	0.91	0.53	0.32	0.47	0.45	0.41	0.23	0.29	0.63	0.35	0.19	0.68	0.36	0.45	1.1	0.44	0.71	0.27	0.27	0.21	0.42	0.18	0.17	0.15	0.64
XLOC_000261	0	0	0	0	0	0	0	0	0	0	0	0	0	0	0	0	0	0	0	0	0	0	0	0	0	0	0	0	0	0	0	0	0	0	0	0	0	0	0	0	0	0	0	0	0	0	0	0	0
XLOC_000262	0.04	0.11	0.13	0.1	0.13	0.14	0.19	0.08	2.88	2.38	1.92	2.11	3.24	2.9	2.46	1.36	0.57	0.89	1.14	0.46	0.38	0.76	0.51	0.49	0.53	0.61	0.54	0.58	0.32	0.93	0.9	0.51	0.26	0.43	1.12	1.19	1.42	1.04	1.32	1.14	0.27	0.18	0.12	0.13	0.34	0.11	0.29	0.19	0.34
XLOC_000263	0.69	0.67	0.43	1	0.65	0.48	0.17	0.82	1.11	1.19	0.9	0.84	1.11	0.75	0.33	0.81	0.68	0.99	0.6	1.63	1.08	0.66	0.43	0.83	0.62	1.01	0.37	1.23	1.07	0.57	0.37	0.68	0.47	0.58	0.84	1.4	1.54	1.12	0.21	0.61	0.51	1.05	0.5	0.88	1.27	0.4	0.51	0.96	0.45
XLOC_000264	0.21	0.31	0.33	0.64	0.18	0.44	0.4	0.33	0.19	0.16	0.11	0.17	0.3	0.24	0.26	0.11	0.23	0.17	0.07	0.14	0.36	0.23	0.13	0.16	0.09	0.25	0.08	0.24	0.13	0.08	0.01	0.16	0.15	0.14	0.3	0.18	0.12	0.1	0.24	0.18	0.1	0.3	0.21	0.19	0.1	0.43	0.14	0.28	0.08
XLOC_000265	0.25	0.17	0.51	0.26	0.46	0.25	0.41	0.36	0.31	0.28	0.49	0.32	0.49	0.37	0.48	0.37	0.27	0.26	0.37	0.26	0.29	0.22	0.33	0.38	0.16	0.24	0.38	0.29	0.27	0.24	0.26	0.23	0.21	0.27	0.52	0.48	0.26	0.35	0.3	0.36	0.2	0.29	0.63	0.35	0.44	0.3	0.53	0.34	0.22
XLOC_000266	0	0.03	0	0	0	0	0	0	0	0	0.13	0	0	0	0.03	0	0.12	0	0	0	0	0	0	0	0	0.22	0	0	0	0	0	0	0	0	0	0.1	0.04	0	0	0	0	0	0.28	0	0	0.06	0	0	0.06
XLOC_000267	0	0.03	0	0	0.04	0	0	0	0	0.12	0	0.02	0.22	0.39	0.05	0	0.07	0.07	0.19	0.09	0.33	0.22	0.18	0.04	0	0.25	0.21	0.1	0.17	0	0	0.06	0	0.14	0	0	0	0	0.26	0	0.03	0.55	0.18	0.05	0.16	0.17	0.19	0.06	0
XLOC_000268	0.02	0.03	0.03	0	0	0	0	0.02	0.04	0.06	0	0.04	0.11	0.04	0.23	0.12	0.05	0.03	0.05	0.02	0.02	0.23	0.09	0.04	0.05	0.05	0	0	0.06	0	0	0.07	0	0.02	0.02	0.09	0.04	0	0.13	0	0.01	0.15	0	0.04	0	0.01	0.03	0	0.03
XLOC_000269	0.6	0.69	0.77	0.88	0.7	0.66	0.54	0.55	0.57	0.69	0.57	0.63	0.95	0.86	0.76	0.74	0.9	1.3	0.84	0.82	0.98	0.92	0.99	1.08	1.06	1.89	1.55	1.21	1.02	1.15	0.81	1.12	1.25	1.4	0.88	0.83	0.86	0.83	0.78	0.54	1.51	2.12	1.7	1.65	1.72	1.87	1.63	1.6	1.16
XLOC_000270	0	0.05	0	0	0	0	0.07	0	0	0	0.41	0	0	0.04	0	0	0	0	0.14	0	0	0	0	0	0	0	0	0	0	0	0	0	0	0.05	0.07	0	0	0	0	0	0	0	0	0	0	0	0.05	0	0
XLOC_000271	0.04	0.09	0	0.07	0.21	0	0	0.15	0	0.02	0	0	0	0.02	0	0	0	0	0	0	0.08	0	0	0.07	0	0	0	0.02	0	0	0	0	0	0	0	0	0	0	0	0	0	0	0.05	0.04	0	0	0	0	0
XLOC_000272	0	0	0	0	0	0	0.07	0	0	0	0	0	0	0	0	0	0	0	0	0	0	0	0	0	0	0	0	0.04	0	0	0	0	0	0	0	0	0	0	0	0.09	0	0	0.58	0	0	0	0	0	0
XLOC_000273	0	0.08	0	0.05	0	0	0.05	0.1	0	0	0	0	0	0	0	0	0	0	0	0	0	0	0	0	0	0	0	0.03	0	0	0	0	0	0	0	0	0	0	0	0	0	0	0.49	0.12	0	0	0	0	0.07
XLOC_000274	0.06	0	0.06	0.16	0	0.05	0.05	0	0	0	0.01	0.03	0.03	0	0.11	0	0	0.02	0.46	0.14	0.18	0.24	0.16	0.27	0.03	0	0.08	0.07	0.05	0.39	0.06	0	0	0	0.08	0	0	0	0	0	0	0.12	0.05	0.06	0.08	0.03	0.1	0.04	0
XLOC_000275	0.49	0.37	0.71	0.27	0.51	0.93	0.4	0.41	0.63	0.56	0.42	0.49	0.8	1.09	0.4	0.41	0.1	0.16	0.22	0.2	0.21	0.24	0.24	0.12	0.06	0.22	0.27	0.11	0.24	0.37	0.18	0.12	0.12	0.31	0.31	0.28	0.3	0.44	0.45	0.73	0.14	0.06	0.03	0.22	0.18	0.08	0.19	0.13	0.22
XLOC_000276	0.22	0.2	0.18	0.16	0.22	0.27	0.15	0.23	0.48	0.61	0.59	0.7	1.05	0.96	0.87	0.6	0.16	0.17	0.22	0.18	0.24	0.2	0.2	0.13	0.13	0.09	0.17	0.16	0.15	0.08	0.15	0.23	0.21	0.19	0.27	0.44	0.42	0.43	0.45	0.37	0.07	0.16	0.05	0.11	0.14	0.17	0.19	0.16	0.13
XLOC_000277	0	0	0	0	0	0	0	0	0	0	0	0	0	0	0	0	0	0	0	0	0	0	0	0	0	0	0	0	0	0	0	0	0	0	0	0	0	0	0	0	0	0	0	0	0	0	0	0	0
XLOC_000278	0	0	0	0	0	0	0	0	0	0	0	0	0	0	0	0	0	0	0	0	0	0	0	0	0	0	0	0	0	0	0	0	0	0	0	0	0	0	0	0	0	0	0	0	0	0	0	0	0
XLOC_000279	0.04	0.06	0.08	0.07	0.02	0.06	0	0.02	0.1	0.4	0.16	0.03	0.18	0.31	0.04	0.17	0.03	0.03	0.04	0	0.05	0	0	0	0	0.03	0.06	0	0	0.03	0	0.03	0.03	0.12	0.05	0.04	0.06	0	0	0	0	0.03	0	0	0.14	0	0	0	0.04
XLOC_000280	0	0	0	0	0	0	0	0	0.41	0.34	0.15	0.19	0	0	0.13	0.07	0	0	0.06	0	0	0	0	0	0	0	0	0	0	0	0	0.18	0.17	0.09	0.82	0.23	0.1	1.51	0.2	0	0	0	0	0	0	0	0	0	0
XLOC_000281	0	0	0.05	0.03	0	0	0	0	0	0	0.07	0	0.15	0.06	0	0	0	0	0.11	0.03	0.06	0.04	0.11	0.03	0	0	0.06	0	0	0	0.26	0	0	0	0.49	0.21	0.09	0	0	0.32	0	0	0.14	0.02	0	0	0.12	0	0.04
XLOC_000282	1.07	1.2	0.77	0.53	1.98	0.78	1.09	1.61	0.79	0.71	1.21	0.67	0.38	0.45	0.44	0.48	0.88	0.62	0.84	1.23	0.54	1.15	0.66	1.01	0.97	1.13	1.2	0.9	0.96	0.68	0.87	1.07	0.63	0.85	1.37	0.93	1.12	1.68	0.92	2.05	0.94	0.71	1.11	0.34	0.63	1.12	0.48	1.13	0.98
XLOC_000283	1.67	2.15	1.8	1.97	1.72	2.12	1.88	2.2	0.03	0.04	0.07	0.08	0	0.03	0.13	0.1	0.05	0.07	0.16	0.04	0.22	0.14	0.37	0.2	0.04	0.06	0.09	0.31	0.25	0.11	0.47	0.16	0.06	0.04	0.07	0.15	0.1	0.2	0.19	0.11	0.11	0.04	0.19	0.23	0.26	0.04	0.15	0.13	0.11
XLOC_000284	0.08	0.11	0.03	0	0	0	0.04	0.07	0	0.31	0	0	0	0	0.05	0	0	0	0	0	0.08	0	0	0.07	0	0	0	0	0	0	0	0.21	0	0.28	0.27	0.08	0	0.3	0	0	0.02	0	0.07	0.02	0	0	0.2	0	0
XLOC_000285	0	0	0	0	0	0	0	0	0	0	0	0	0	0	0	0.09	0.42	0.27	0.16	0.63	0.63	0.39	0.09	0.28	0.24	0.24	0.39	0.53	0.07	0.19	0.38	0.07	0.12	0.16	0	0	0	0	0	0	0.3	0.21	0	0.33	0.03	0	0.15	0	0.73
XLOC_000286	0.04	0.03	0.05	0.06	0.01	0	0.05	0.02	0.02	0.14	0.05	0.11	0.04	0.03	0.09	0.06	0.18	0.2	0.04	0.11	0.05	0.08	0.08	0.02	0.12	0.16	0.09	0.08	0.21	0	0.29	0.08	0.04	0.1	0.05	0.03	0	0	0.08	0.2	0.1	0.07	0.02	0.19	0.13	0.03	0.15	0.16	0.09
XLOC_000287	2.07	2.19	2.67	3.04	3.25	3.8	3.55	3.24	0.64	0.43	2.01	0.66	1.11	1.21	0.66	1.15	2.41	2.15	3.15	3.6	2.63	3.45	2.53	2.62	2.71	1.72	2.07	2.77	2.2	2.83	1.91	5.08	3.1	2.65	2.5	1.4	1.01	1.4	1.6	1.6	4.4	5.28	6.61	5.2	4.08	5.76	3.5	5.74	2.98
XLOC_000288	0	0	0	0	0	0	0	0	0	0	0	0	0	0	0	0	0.06	0.04	0.08	0.1	0.05	0	0.02	0.04	0.03	0.06	0	0.13	0	0	0	0.08	0.02	0	0.02	0	0	0	0	0	0.13	0	0	0	0	0	0	0	0.06
XLOC_000289	0.02	0	0	0	0	0	0	0	0.04	0.05	0.07	0	0.03	0.01	0.01	0.01	0.45	0.56	0.45	0.13	0.21	0.14	0.22	0.47	0.64	0.33	0.09	0.2	0.14	0.2	0.04	0.08	0.37	0.33	0.04	0.16	0.02	0.08	0.07	0	0.13	0.11	0.05	0.08	0.05	0.02	0.02	0	0.43
XLOC_000290	0	0	0	0	0	0	0	0	0	0	0	0	0	0	0	0	0	0	0	0	0	0	0	0	0	0	0	0	0	0	0	0	0	0	0	0	0	0	0	0	0	0	0	0	0	0	0	0	0
XLOC_000291	0	0	0	0	0	0	0	0	0	0.05	0.06	0	0	0.01	0	0	0.21	0.32	0.18	0.41	0.26	0	0.11	0.11	0.12	0.07	0.08	0.2	0.06	0.06	0.01	0.07	0.17	0.06	0.07	0	0	0	0.05	0	0.09	0.09	0.04	0.08	0.04	0.02	0	0	0.36
XLOC_000292	0	0	0	0	0	0	0	0	0	0	0	0	0	0	0	0	0	0	0	0	0	0	0	0	0	0	0	0	0	0	0	0	0	0	0	0	0	0	0	0	0	0	0	0	0	0	0	0	0
XLOC_000293	0	0	0	0	0	0	0	0	0.01	0.07	0.13	0	0.02	0	0	0	0.31	0.24	0.16	0.2	0.17	0.13	0.21	0.09	0.06	0.12	0.02	0.05	0.09	0.02	0.11	0.11	0.14	0.12	0.13	0.03	0	0	0	0	0.18	0.15	0.12	0.04	0.07	0	0.04	0.05	0.2
XLOC_000294	0	0	0	0	0	0	0	0	0	0	0.05	0.03	0	0	0	0	0	0.11	0	0.05	0.07	0.06	0	0.07	0	0	0	0	0.18	0.06	0	0.06	0.11	0	0	0.02	0	0	0	0	0.51	1.45	0.46	0.62	0.89	0.49	0.38	0.68	0.12
XLOC_000295	2.22	3.91	3.46	4.16	4.81	4.8	3.54	5.09	0.67	1.09	0.8	1.11	1.96	1.73	1.4	1.74	0.86	1.26	0.76	1.25	1.63	1.46	1.25	1.84	0.9	1.15	1.23	0.99	1.02	1.81	0.9	1.69	1.08	1.49	1.03	1.03	1.01	1.82	1.44	1.34	1.45	1.9	1.66	1.92	2.3	2.68	1.89	2.63	0.99
XLOC_000296	0.09	0	0	0.03	0.17	0.06	0.02	0	0.33	0.3	0.31	0.24	0.55	0.45	0.43	0.55	0.25	0.37	0.13	0.14	0.06	0.09	0.07	0.05	0.09	0.38	0.05	0.1	0.07	0.07	0.05	0	0.09	0.14	0.15	0.07	0.11	0.22	0.37	0.32	0.08	0.08	0.02	0.05	0	0.01	0.06	0.08	0.1
XLOC_000297	0	0.47	0	0.22	0.14	0.12	0.19	0	0	0.33	0.04	0.11	0.04	0	0.04	0	0.05	0.05	0.07	0.07	0.13	0	0.11	0	0	0.08	0.43	0.25	0.65	0	0	0.04	0.3	0.15	0.32	0	0	0.14	0.16	0	0.08	0.15	0.19	0.11	0.04	0.17	0.19	0.24	0.24
XLOC_000298	0.86	0.61	0.35	0.77	0.55	0.58	0.72	0.93	1.65	1.06	1.48	1.77	1.95	0.68	1.08	1.24	3.76	1.47	2.85	2.78	2.21	1.78	1.7	2.41	5.05	2.82	1.98	2.11	1.57	1.9	1.31	1.57	3.48	1.31	1.44	1.21	2.61	1.05	1.26	0.85	3.16	1.17	1.77	1.76	2.22	1.76	1.48	1.14	3.22
XLOC_000299	3.75	3.26	2.12	5.06	4.67	3.89	3.16	3.26	0.17	0.26	0.2	0.1	0.03	0	0.05	0.11	0.17	0.25	0.25	0.27	0.57	0.49	0.27	0.48	0.32	0.09	0.16	0.33	0.27	0.28	0.67	0.25	0.41	0.07	0.41	0.73	0	0.1	0.18	0.53	0.31	0.63	0.96	0.85	1.11	1.15	1.25	0.87	0.18
XLOC_000300	0.13	0.21	0.05	0.16	0.3	0.26	0.17	0.28	0.02	0	0.02	0.02	0	0	0.06	0.04	0.06	0.03	0.1	0.02	0.09	0	0	0.05	0.03	0	0.05	0.08	0.07	0.02	0	0.05	0.03	0.08	0.04	0.07	0.2	0.14	0.09	0	0	0	0	0.06	0.04	0.13	0.04	0.01	0
XLOC_000301	0	0	0.02	0.03	0.17	0.07	0	0.04	0.02	0.11	0.12	0.36	0.57	0.33	0.02	0.12	0	0	0	0	0	0	0	0	0	0	0	0.01	0	0	0	0	0	0.02	0.08	0.1	0.07	0.09	0.02	0.07	0	0	0	0	0	0	0	0	0
XLOC_000302	0.35	0.48	0.48	0.52	0.48	0.38	0.32	0.12	0.08	0.14	0.07	0.05	0.05	0.05	0.15	0.13	0.03	0	0	0.09	0.16	0.05	0.28	0	0.27	0.07	0.15	0.25	0.17	0.13	0.05	0	0.03	0.23	0.37	0.43	0.38	0.46	0.31	0.5	0.05	0.02	0.3	0.31	0.24	0.13	0.36	0.12	0
XLOC_000303	0.55	1.12	1.37	1.12	0.96	1.45	0.99	0.96	0.61	0.49	0.57	0.65	0.83	0.99	0.79	0.51	0.32	0.58	0.6	0.47	0.36	0.54	0.49	0.53	0.68	0.56	0.68	0.51	0.37	0.6	0.31	0.41	0.75	0.77	0.43	0.7	0.37	0.62	0.59	0.33	0.34	0.38	0.32	0.46	0.3	0.36	0.31	0.31	0.47
XLOC_000304	0.69	0.72	0.62	0.71	0.6	0.9	0.52	0.57	0.3	0.37	0.41	0.31	0.31	0.27	0.25	0.4	0.2	0.27	0.28	0.31	0.23	0.46	0.18	0.43	0.24	0.25	0.21	0.27	0.23	0.4	0.28	0.13	0.34	0.39	0.28	0.41	0.6	0.64	0.37	0.43	0.33	0.34	0.3	0.56	0.24	0.36	0.34	0.41	0.38
XLOC_000305	0.91	0.57	0.83	0.85	0.81	1.47	1.16	1.14	0.45	0.81	0.8	0.91	0.68	0.89	0.96	0.96	1.32	1.14	1.02	1.87	1.45	1.69	1.88	1.93	1.55	1.25	1.48	1.5	1.5	1.67	3.03	1.84	1.31	1.55	0.51	1.38	1.36	1.59	1.64	1.95	2.63	1.76	2.17	3.01	1.9	1.78	3.44	2.9	1.21
XLOC_000306	0.02	0.01	0.03	0.02	0	0	0	0	0.26	0.19	0.29	0.11	0.34	0.21	0.21	0.02	0.03	0	0.04	0	0	0	0	0	0.01	0	0.01	0	0	0	0	0	0.03	0.01	0.06	0.02	0	0	0.09	0	0	0	0	0	0	0	0	0.01	0
XLOC_000307	0.21	0.08	0.15	0.35	0	0	0.14	0	1	0.45	0.15	0.28	0.46	0.7	0.68	0.27	0.09	0.06	0	0	0	0.14	0.26	0	0	0	0	0.08	0.04	0	0.02	0	0.04	0.15	0.06	0.37	0.28	0.09	0.2	0.23	0	0	0	0.09	0	0.02	0	0	0
XLOC_000308	0.46	0.35	0.21	0.3	0.68	0.4	0.27	0.23	0.02	0.27	0.23	0.31	0.38	0.26	0.56	0.3	0.11	0.19	0.09	0.28	0.08	0.18	0.28	0.25	0.18	0.05	0.11	0.08	0.24	0.12	0.03	0.12	0.21	0.3	0.33	0.17	0.05	0.12	0.57	0.03	0.24	0.19	0.31	0.47	0.36	0.54	0.41	0.33	0
XLOC_000309	0.55	0.11	0.57	0	0.47	0.21	0.58	0.63	0	0	0	0	0.13	0	0	0	0	0	0	0.08	0	0	0	0.07	0.31	0	0	0	0	0.05	0	0	0.06	0	0	0	0	0.25	0	0	0	0.09	0	0.08	0	0	0.27	0	0
XLOC_000310	1.66	1.4	2.19	1.31	1.7	1.79	1.53	2.39	0	0	0	0	0	0	0	0	0	0	0.7	0	0.25	0	0.11	0.18	0.04	0.11	0.5	0.11	0.3	0.74	0.67	0.08	0	0.05	0.52	0.27	0	0	0.24	0	0.46	0.11	0.74	0.35	0.53	0.83	0.42	0.47	0.31
XLOC_000311	0	0.33	0.04	0.17	0	0.28	0.05	0.14	0.26	0.17	0.11	0.4	0.09	0.28	0.03	0.19	0.17	0.16	0.11	0.11	0	0.2	0.17	0.19	0.27	0.27	0.18	0.37	0.03	0.19	0.2	0.47	0	0.08	0.15	0.11	0.05	0.11	0.06	0.18	0.12	0.3	0.18	0.38	0.16	0.13	0.18	0	0
XLOC_000312	0.37	0.41	0.19	0.32	0.33	0.26	0.15	0.18	0.16	0.25	0.47	0.8	0.09	0.21	0.07	0.15	0.15	0.07	0.37	0.23	0.3	0.2	0.19	0.11	0.15	0.22	0.34	0.03	0.4	0.52	0.61	0.21	0.07	0.35	0.53	0	0.23	0.76	0.04	0	0.13	0.18	0	0.4	0.12	0.18	0.09	0.18	0.26
XLOC_000313	0.3	0.21	0.16	0.18	0.75	0.39	0.35	0.2	0.4	0.04	0.36	0.12	0.25	0.13	0.08	0.13	0.29	0.16	0.54	0.22	1.03	1.02	1.39	0.78	0.09	0.21	0.51	0.47	1.04	0.77	0.94	0.47	0.05	0.56	0.71	0.07	0.72	1.33	0.88	1.11	0.59	0	0.26	0.38	0.22	0.69	0.82	0.98	0.26
XLOC_000314	0.43	0.24	0.48	0.36	0.52	0.37	0.38	0.4	0.26	0.23	0.57	0.29	0.21	0.36	0.52	0.29	0.1	0.09	0.29	0.12	0.25	0.2	0.28	0.1	0.12	0.22	0.49	0.15	0.18	0.31	0.39	0.2	0.69	0.69	1.9	1	0.47	1.26	0.96	0.54	0.08	0.09	0.43	0.31	0.21	0.29	0.67	0.37	0.14
XLOC_000315	0.49	0.48	0.08	0.17	0.11	0.19	0	0.1	0.1	0.06	0.03	0	0	0	0	0.25	0.13	0.08	0.11	0	0.15	0	0.04	0	0.09	0.12	0	0.11	0.2	0	0.79	0.17	0.47	0.36	0.05	0.21	0.09	0.45	0.13	0.12	0.12	0.12	0.12	0.05	0.06	0.29	0.48	0.37	0
XLOC_000316	1.64	1.74	1.36	1.14	0.99	0.67	0.48	0.62	0.79	0.67	1.02	0.66	0.47	0.49	1.18	0.42	1.39	1.26	0.87	1.17	0.83	0.68	1.01	0.72	1.62	1.98	1.14	0.89	0.98	1.07	0.41	0.85	2.84	2.8	1.69	2.5	1.46	1.68	0.74	1.71	2.27	2.3	1.78	1.49	2.09	1.13	1.34	1.53	1.6
XLOC_000317	0	0.02	0.01	0.01	0	0.03	0.06	0.06	0.22	0.22	0.35	0.37	0.2	0.05	0.49	0.51	0.12	0.14	0.16	0.12	0.04	0.14	0.19	0.21	0.13	0.1	0.19	0.05	0.15	0.17	0.04	0.29	0.2	0.38	0.54	0.23	0.23	0.08	0.45	0.42	0.07	0.01	0.07	0.03	0.17	0.04	0.26	0.07	0
XLOC_000318	0	0	0	0	0	0	0	0	0.04	0	0.23	0.26	0.08	0	0.25	0.09	0.03	0	0.04	0.11	0.1	0	0.06	0.03	0	0	0.15	0.12	0.28	0	0.2	0	0	0.03	0.07	0	0	0	0	0.08	0	0.1	0	0.09	0.09	0.05	0.1	0	0
XLOC_000319	0	0	0	0	0	0	0	0	0.27	0.06	0.28	0.49	0.24	0.24	0.55	0.18	0.11	0.17	0.28	0.52	0.17	0	0.28	0.16	0.12	0	0.33	0.39	0.36	0.04	0.11	0.08	0.58	0	0.16	0.24	0	0.04	0.21	0.1	0.04	0.01	0.68	0.93	0.19	0	0.75	0.08	0.06
XLOC_000320	0	0	0	0	0	0	0	0	0	0	0	0	0	0	0	0	0	0	0	0	0	0	0	0	0	0	0	0	0	0	0	0	0	0	0	0	0	0	0	0	0	0	0	0	0	0	0	0	0
XLOC_000321	0	0	0	0	0	0	0	0	0	0	0.01	0	0	0	0	0	0.09	0.2	0.02	0.11	0	0.06	0	0.04	0.18	0.14	0.03	0	0.09	0.03	0	0.14	0.48	0.19	0.13	0.12	0	0.02	0	0	0.08	0.18	0.25	0.2	0	0.09	0.03	0.03	0.16
XLOC_000322	0.01	0	0	0	0	0	0	0	0.03	0.02	0.06	0.09	0.2	0.2	0.12	0.1	0.07	0.06	0.16	0.19	0.12	0.09	0.16	0.32	0.17	0.07	0.21	0.25	0.19	0.1	0.18	0.18	0.12	0.06	0.11	0.03	0.04	0.02	0.02	0.07	0.21	0.17	0.17	0.13	0.2	0.18	0.24	0.2	0.08
XLOC_000323	0	0	0	0	0	0	0	0	0	0	0	0	0	0	0	0	0	0	0	0	0	0	0	0	0	0	0	0	0	0	0	0	0	0	0	0	0	0	0	0	0	0	0	0	0	0	0	0	0
XLOC_000324	0	0	0	0	0	0	0	0	0	0	0	0	0	0	0	0	0	0	0	0	0	0	0	0	0	0	0	0	0	0	0	0	0	0	0	0	0	0	0	0	0	0	0	0	0	0	0	0	0
XLOC_000325	0	0	0	0	0	0	0	0	0	0	0.16	0.12	0.12	0.17	0.11	0.15	0	0.04	0.08	0.12	0	0.15	0.08	0.24	0	0	0.21	0.14	0.09	0.27	0.18	0.14	0.02	0.26	0.19	0.02	0	0	0.29	0	0.14	0.01	0.28	0.08	0.03	0	0	0.09	0.06
XLOC_000326	0.51	0.48	0.66	0.7	0.73	0.86	0.55	0.87	1.73	1.63	1.74	1.49	1.24	1.22	1.25	2.06	2.38	1.8	2.41	2.19	2.35	3.17	2.14	3.88	2.09	2.32	2.03	2.32	2.83	2.9	1.75	3.92	1.84	1.3	1.32	1.11	1.01	2.03	1.21	2.36	1.5	1.38	1.53	1.61	1.49	1.68	1.56	1.74	1.77
XLOC_000327	0.83	1.53	1.49	1.21	1.15	1.79	1.05	1.15	0.76	0.46	0.38	0.21	0.24	0.59	0.79	0.22	0.54	0.59	0.29	0.33	0.23	0.47	0.56	0.51	0.7	0.27	0.67	0.19	0.76	0.68	0.51	0.7	0.73	0.44	0.56	0.84	0.42	0.72	0.9	0.99	0.6	0.37	0.55	0.26	0.31	0.36	0.88	0.47	0.23
XLOC_000328	0.11	0	0.74	0.41	0.28	0.54	0.21	0.2	0.34	0.24	0.42	0.33	0.4	0.39	0.63	0.13	0.13	0.2	0.35	0.5	0.41	0.07	0.73	0.69	0.1	0.28	0.51	0.6	0	0.41	0.68	0.11	0.41	0.34	0.96	0.56	0.3	0.95	0.73	0.32	0.13	0.19	0.42	0.46	0.24	0.41	0.47	0.23	0.19
XLOC_000329	63.79	61.01	62.3	55.46	63.87	66.13	58.17	62.76	35.98	34.29	35.77	32.05	35.85	36.26	33.36	41.16	42.11	48.5	54.08	42.19	47.53	46.84	48.08	45.42	32.19	26.4	34.14	36.54	40.6	34.04	50.33	41.43	27.8	25.01	31.73	22.5	26.23	22.35	33.9	26.43	35.81	39.49	47.43	43.2	38.3	40.52	41.52	44.73	39.65
XLOC_000330	1.15	0.55	0.77	0.74	0.28	0.95	0.72	0.74	0.11	0.1	0.04	0.06	0.08	0.1	0.2	0.05	0.26	0.26	0.05	0.1	0.05	0.1	0.12	0.13	0.13	0.01	0.06	0.12	0.2	0	0.01	0.02	0.34	0.52	0.05	0.13	0.13	0	0.09	0.18	0.14	0.21	0.28	0.22	0.09	0.41	0.27	0.14	0.15
XLOC_000331	0.37	0.03	0.03	0.11	0.28	0.08	0.13	0.08	0.11	0.25	0.1	0.2	0.48	0.26	0.23	0.57	0.22	0.73	0.05	0.46	0.3	0.06	0.22	0.28	0.42	0.44	0.84	0.07	0.47	0.25	0.38	0	0.24	0.24	0.22	0.59	0.12	0.48	0.65	0.11	0.13	0.31	0.16	0.17	0.44	0.14	0.16	0.1	0.32
XLOC_000332	0.21	0.16	0.21	0.2	0.13	0.26	0.23	0.72	0.31	0.18	0.28	0.36	0.55	0.75	0.46	0.51	0.27	0.22	0.29	0.14	0.32	0.28	0.54	0.41	0.15	0.27	0.38	0.23	0.23	0.33	0.19	0.35	0.13	0.12	0.2	0.33	0.25	0.31	0.35	0.25	0.22	0.27	0.31	0.21	0.18	0.36	0.34	0.5	0.22
XLOC_000333	1.28	2.74	1.61	0.68	1.12	0.95	0.52	1.35	0.64	0.25	0.15	0.6	0.67	0.4	0.42	0.44	0.51	0.24	0.58	0.09	0.3	0.12	0.08	0.24	0.51	0.16	0.13	0	0.09	0.62	0.18	0.09	0.17	0.67	0.13	0.19	0.29	0.69	0.39	0.38	0	0.05	0.08	0.14	0	0.2	0	0.06	0.48
XLOC_000334	0	0.29	0.03	0.06	0	0	0	0	0	0.04	0	0	0	0	0	0	0	0	0	0	0	0	0	0	0	0	0	0	0	0	0	0	0	0	0	0	0	0	0	0	0	0	0	0	0	0	0	0	0
XLOC_000335	0.06	0.22	0.08	0.17	0.11	0.13	0.15	0.04	0.02	0.14	0.1	0.13	0.09	0.11	0.14	0.18	0.24	0.19	0.19	0.19	0.26	0.11	0.21	0.37	0.05	0.14	0.03	0.25	0.13	0.14	0.23	0.15	0.08	0.12	0.03	0.03	0	0	0	0	0.15	0.32	0.15	0.15	0.15	0.33	0.21	0.12	0.19
XLOC_000336	0	0	0	0	0	0	0	0	0	0	0	0	0	0	0	0	0	0	0	0	0	0	0	0	0	0	0	0	0	0	0	0	0	0	0	0	0	0	0	0	0	0	0	0	0	0	0	0	0
XLOC_000337	0.06	0	0	0	0	0.1	0	0	0	0	0.34	0	0.03	0.03	0	0	0	0	0.24	0	0	0	0	0	0	0	0	0	0	0	0	0	0	0	0.5	0.7	0	0.06	0.28	0.27	0	0	0	0.06	0	0	0	0	0
XLOC_000338	0	0	0.03	0	0	0	0	0	0	0	0	0	0	0	0	0.05	0	0	0	0	0	0	0	0	0	0	0.3	0	0	0	0.04	0	0	0	0.04	0	0	0	0	0.09	0	0	0	0	0	0	0	0	0
XLOC_000339	0.81	0.73	0.89	0.99	0.45	0.42	0.75	0.66	0.27	0.28	0.49	0.48	0.37	0.32	0.48	0.36	0.19	0.37	0.27	0.5	0.13	0.27	0.36	0.34	0.08	0.19	0.73	0.24	0.02	0.21	0.63	0.21	0.26	0.48	0.48	0.28	0.16	0.27	0.61	0.41	0.53	0.61	1.13	0.73	0.53	0.43	0.64	0.43	0.3
XLOC_000340	0.14	0.63	0.8	0.11	0.18	0.4	0.1	0.35	0.13	0.7	0.15	0.23	0.16	0.45	0.24	0.02	0.06	0.13	0.04	0.14	0.16	0	0.11	0.22	0.2	0.18	0.5	0.04	0.11	0.06	0	0	0.39	0.29	0.27	0.18	0.22	0	0.33	0.08	0.02	0.28	0.3	0.25	0.17	0.24	0.17	0.02	0
XLOC_000341	1.08	1.14	1.04	0.75	0.42	0.75	0.83	0.67	0.35	0.41	0.45	0.34	0.8	0.49	0.37	0.25	0.1	0.39	0.15	0.15	0.23	0.81	0.26	0.3	0.44	0.36	0.51	0.26	0.28	0.31	0.12	0.25	0.58	0.42	0.28	0.63	0.2	0.58	0.38	0.1	0.36	0.32	0.45	0.39	0.29	0.65	0.16	0.37	0.41
XLOC_000342	0.39	0.51	0.72	0.57	1.11	0.53	0.67	0.98	1.47	1.51	1.37	0.93	0.97	0.74	1.18	1.28	0.78	0.91	1.15	0.87	1.27	0.82	1.6	1.28	0.86	0.93	1.25	0.87	1.45	0.86	1.33	1.31	1.12	1.17	1.59	1.24	1.43	0.74	1.32	1.43	0.85	0.91	1.42	1.27	1.89	0.83	1.8	1.43	0.78
XLOC_000343	0.11	0.13	0.07	0.17	0.17	0.21	0.09	0.26	0.37	0.27	0.46	0.4	0.37	0.35	0.34	0.38	0.19	0.2	0.16	0.16	0.21	0.29	0.37	0.19	0.08	0.17	0.16	0.17	0.12	0.23	0.18	0.29	0.17	0.19	0.29	0.22	0.49	0.15	0.36	0.23	0.14	0.15	0.2	0.2	0.21	0.21	0.2	0.17	0.29
XLOC_000344	0.13	0.21	0.23	0.32	0.17	0.05	0.25	0.15	0.57	0.28	0.19	0.38	0.5	0.35	0.41	0.31	0.44	0.59	0.09	0.23	0.19	0.1	0.17	0.14	0.28	0.64	0.53	0.37	0.21	0.27	0.12	0.18	0.81	0.24	0.38	0.19	0.15	0.63	0.2	0.05	0.91	1.53	1.04	0.8	0.34	0.57	0.06	0.83	0.55
XLOC_000345	0	0.04	0	0.05	0.06	0	0.03	0.06	0.4	0.21	0.41	0.53	0.25	0.32	0.28	0.36	0.89	0.63	0.57	0.67	0.68	0.34	0.32	1.15	0.35	0.24	0.26	0.63	0.02	0.11	0.22	0.58	0.41	0.05	0	0.21	0.05	0.13	0.04	0.11	0.31	0.39	0.28	0.46	0.65	0.25	0.45	0.91	0.64
XLOC_000346	8.04	8.39	9.1	8.35	7.8	6.9	8.02	7.74	5.49	5.32	4.87	5.17	5.17	5.28	5.21	5.69	3.8	4.05	3.57	4.05	3.74	3.51	4.73	4.22	3.68	3.29	4.66	3.78	4.28	3.84	3.43	3.8	4.23	4.11	4.69	4.03	3.65	3.29	4.81	4.28	3.23	3.76	3.56	3.87	3.41	3.33	3.71	3.72	3.32
XLOC_000347	0	0	0	0	0	0	0	0	0	0	0	0	0	0	0	0	0	0	0	0	0	0	0	0.04	0	0.16	0	0	0	0	0	0	0	0	0	0	0	0	0	0.1	0	0.05	0.59	0.04	0.1	0.31	0	0	0.14
XLOC_000348	0.05	0.03	0	0	0	0.04	0	0	0.09	0.09	0.09	0.24	0.37	0.47	0.07	0.12	0.19	0.31	0.18	0.12	0.37	0.12	0.12	0.19	0.45	0.25	0.06	0.25	0	0.45	0.07	0.36	0.33	0.24	0.07	0.42	0.26	0	0.12	0.11	0.1	0.1	0.13	0.24	0.06	0.02	0.17	0.1	0.06
XLOC_000349	0.43	0.33	0.33	0.27	0.2	0.3	0.23	0.11	0	0	0.01	0	0.06	0.03	0	0.02	0.02	0	0.08	0.02	0.03	0	0.03	0	0	0	0.03	0	0.09	0.05	0	0	0.02	0	0.04	0	0.02	0	0.02	0	0.03	0.06	0.02	0	0	0.03	0.01	0.01	0.02
XLOC_000350	2.19	2.17	1.95	2.04	2.3	1.94	1.55	1.86	1.2	1.12	1.5	0.89	1.05	1.22	1.14	0.96	1	0.95	1.25	0.73	1.13	1.08	1.26	0.92	0.74	0.61	1.16	0.85	0.77	1.08	0.83	0.62	1	1.09	1.8	1.05	1.25	1.46	1.55	1	0.75	0.97	1.55	0.98	1.37	1.03	1.34	0.74	0.78
XLOC_000351	0	0.04	0.09	0	0	0	0	0	0.85	1.06	0.26	0.81	0.5	0.47	0.57	0.77	0	0.02	0.03	0.03	0	0.04	0.02	0.1	0.07	0.32	0.1	0.11	0.18	0.07	0	0.13	0.04	0.09	0.33	0.29	0.15	0.18	0.51	0.1	0	0	0	0	0	0.07	0	0	0.03
XLOC_000352	0	0	0	0	0	0	0	0	0.38	0.39	0.2	0.33	0.09	0.31	0.32	0.37	0	0.07	0.02	0.02	0.02	0	0	0.02	0	0.33	0	0	0.06	0.06	0.01	0	0.02	0.04	0.07	0.09	0.18	0.07	0.08	0.03	0	0	0	0	0	0.14	0.02	0.02	0.03
XLOC_000353	0	0	0	0	0	0	0	0	0	0	0	0	0	0	0	0	0	0	0	0	0	0	0	0	0	0	0	0	0	0	0	0	0	0	0	0	0	0	0	0	0	0	0	0	0	0	0	0	0
XLOC_000354	0.35	0.89	0.48	0.45	0.31	0.41	0.73	0.88	0.15	0.26	0.23	0.25	0.16	0.32	0.22	0.33	0.52	0.19	0.22	0.55	0.17	0.3	0.25	0.51	0.39	0.33	0.3	0.2	0.42	0.28	0.16	0.16	0.39	0.5	0.68	0.78	0.62	0.54	0.62	0.34	0.26	0.26	0.6	0.39	0.56	0.44	0.52	0.65	0.41
XLOC_000355	0.08	0.05	0.09	0	0.12	0.38	0.04	0.03	0.07	0.1	0.06	0.04	0.09	0.11	0.07	0	0.24	0.14	0.24	0.27	0.14	0.43	0.06	0.2	0.02	0.24	0.24	0.16	0	0.31	0.04	0.05	0.23	0.15	0.15	0.08	0.07	0	0.05	0.04	0.3	0.13	0.15	0.4	0.07	0.19	0.32	0.13	0.04
XLOC_000356	0	0	0	0	0	0	0	0	0	0	0	0	0	0	0	0	0	0	0	0	0	0	0	0	0	0	0	0	0	0	0	0	0	0	0	0	0	0	0	0	0	0	0	0	0	0	0	0	0
XLOC_000357	0	0	0	0	0	0	0	0	0	0	0	0	0	0	0	0	0	0	0	0	0	0	0	0	0	0	0	0	0	0	0	0	0	0	0	0	0	0	0	0	0	0	0	0	0	0	0	0	0
XLOC_000358	0	0	0	0	0	0	0	0	0	0	0	0	0	0	0	0	0	0	0	0	0	0	0	0	0	0	0	0	0	0	0	0	0	0	0	0	0	0	0	0	0	0	0	0	0	0	0	0	0
XLOC_000359	0.16	0.09	0	0.18	0.45	0.03	0.03	0.15	0.37	0.45	0.31	0.26	0.25	0.3	0.13	0.1	0.46	0.28	0.2	0.19	0.12	0.36	0.31	0.45	0.37	0.22	0.76	0.27	0.27	0.22	0.21	0.06	0.43	0.29	0.09	0.19	0.14	0.51	0.42	0.22	0.31	0.13	0.11	0.45	0.1	0.44	0.34	0.18	0.3
XLOC_000360	0	0	0	0	0	0	0	0	0.27	0.14	0	0.07	0	0.14	0.03	0	0.08	0.06	0	0.05	0	0	0	0	0	0	0	0	0	0	0	0	0.31	0.04	0	0	0	0	0	0.06	0	0	0	0.11	0	0	0	0	0.06
XLOC_000361	0	0	0.08	0	0	0	0	0	0.09	0	0.04	0.02	0	0.02	0.06	0	0.09	0	0.04	0	0	0	0.03	0.32	0	0	0	0	0	0	0.18	0.02	0.05	0	0	0	0	0.15	0.3	0.08	0	0	0	0	0	0.04	0	0.15	0.33
XLOC_000362	0	0.02	0.05	0.02	0.05	0.13	0.09	0.13	0.16	0.03	0.09	0.09	0.05	0.14	0.11	0.1	0.02	0.04	0.1	0.02	0.07	0.09	0.26	0	0.11	0.04	0.08	0.06	0.02	0.21	0.03	0.05	0.07	0.07	0.12	0.31	0.11	0.08	0.26	0.11	0.05	0.12	0.06	0.02	0.1	0.01	0.1	0.03	0.03
XLOC_000363	0	0	0	0	0	0	0	0	0	0	0	0	0	0	0	0	0	0	0	0	0	0	0	0	0	0	0	0	0	0	0	0	0	0	0	0	0	0	0	0.92	0	0	0	0	0	0	0	0.22	0
XLOC_000364	0.06	0.04	0.06	0.39	0.19	0	0.05	0.02	0.05	0.06	0.16	0.16	0.19	0.06	0	0.08	0.02	0.04	0.11	0.08	0.1	0.03	0.09	0.07	0.11	0.15	0.17	0	0.09	0.39	0.06	0	0.04	0.06	0.05	0.22	0	0	0.26	0.03	0.11	0.03	0.05	0.08	0.08	0	0.02	0.13	0
XLOC_000365	0.24	0.38	0.28	0.54	0.29	0.25	0.43	0.63	0.19	0.2	0.38	0.47	0.7	0.25	0.85	0.38	0.23	0.57	0.27	0.66	0.48	0.75	0.77	0.71	0.5	0.68	0.46	0.4	0.92	0.37	1.11	0.11	0.92	0.17	0.55	0.52	0.23	0.18	0.72	0.23	0.67	0.39	0.53	0.7	0.94	0.66	0.7	0.92	0.67
XLOC_000366	0.62	0.55	0.14	0.23	0.22	0.59	0.63	0.89	0.42	1.04	0.47	0.47	0.84	0.59	0.58	0.4	1.01	0.95	0.82	0.51	1.03	0.55	0.6	0.84	0.8	0.3	0.66	0.39	0.12	0.27	0.59	0.52	0.83	1.18	0.79	0.54	0.76	0.07	0.53	0.22	0.54	0.77	0.27	0.89	0.62	0.27	1.33	0.86	0.85
XLOC_000367	2.58	1.31	2.76	2.21	2.06	2.58	3.36	2.87	0.5	0.6	0.6	0.61	0.7	1.1	0.9	0.77	0.42	0.48	0.51	0.25	0.41	0.33	0.68	0.42	0.66	0.13	0.41	0.34	0.22	0.32	0.41	0.41	0.32	0.5	0.51	0.29	0.29	0.47	0.48	0.56	0.31	0.52	0.42	0.32	0.22	0.34	0.26	0.28	0.53
XLOC_000368	4.52	3.34	7.66	5.22	5.29	5.68	7.29	6.25	3.22	2.07	2.88	3	2.65	2.64	2.34	2.5	1.69	1.52	2.02	1.6	1.4	1.49	1.74	1.68	2.35	2.87	1.68	1.11	1.27	0.89	1.14	1.56	1.59	1.86	3.29	1.86	3.77	1.9	2.58	3.71	1.64	1.31	1.5	0.72	0.94	0.99	0.94	1.36	2.15
XLOC_000369	9.8	9.5	11.27	9.79	8.84	7.98	8.27	10.38	6.48	6.34	6.44	7	8.93	8.52	8.88	8.51	4.96	6.66	4.06	4.84	4.56	4.51	5.07	5.13	5.25	4.39	5.49	4.95	4.42	5.22	4.58	5.16	5.28	5.86	5.26	5.16	4.27	5.05	5.88	5.21	5.52	6.5	6.74	6.2	5.67	6.49	6.47	6.12	5.23
XLOC_000370	0.22	0.38	0.12	0.49	0.26	0.26	0.1	0.83	0.36	0.34	0.24	0.2	0.33	0.33	0.3	0.73	0.17	0.56	0.05	0.39	0.2	0.59	0.26	0.41	0.33	0.41	0.12	0.46	0.08	0.35	0.19	0.55	0.23	0.4	0.33	0.08	0.19	0.67	0.47	0.61	0.52	0.46	0.08	0.24	0.41	0.16	0.27	0.49	0.21
XLOC_000371	0	0	0.02	0	0	0	0	0	0.46	0.17	0.28	0.4	0.22	0.37	0.39	0.13	0.12	0.06	0.02	0.06	0.01	0	0	0	0.05	0.02	0.09	0.08	0.06	0	0	0	0.08	0.02	0	0.17	0.19	0.07	0.07	0.07	0.05	0	0	0.01	0.03	0.04	0.11	0.02	0.05
XLOC_000372	0.21	0.35	0.19	0.14	0.12	0.23	0.15	0.15	0.1	0.06	0.25	0.05	0.02	0.01	0	0.01	0.33	0.29	0.4	0.42	0.64	0.42	0.39	0.78	0.24	0.16	0.22	0.26	0.26	0.29	0.11	0.24	0.35	0.35	0.17	0.11	0.06	0.12	0.11	0.1	0.09	0.12	0.11	0.06	0.13	0.09	0.18	0.14	0.34
XLOC_000373	0.1	0.07	0.04	0	0.07	0.04	0	0.02	0.33	0.6	0.75	0.35	0.28	0.13	0.22	0.21	1.34	1.43	0.65	0.82	0.38	0.84	1.44	0.89	0.57	0.91	0.38	0.46	0.25	0.19	0.76	0.18	0.68	0.59	0.65	0.41	0.47	0.41	0.11	0.45	0.68	0.46	0.29	0.11	0.31	0.18	0.37	0.42	0.75
XLOC_000374	0	0.17	0	0.06	0	0	0.03	0.03	0.04	0	0	0	0.04	0.06	0.02	0.04	0.05	0.15	0	0	0	0.17	0.08	0	0.08	0.33	0	0	0	0.11	0	0	0.28	0	0	0.17	0	0.11	0.08	0.08	0	0	0.1	0.11	0.15	0	0.02	0.1	0
XLOC_000375	0.74	0.65	0.68	0.39	0.7	0.46	0.4	0.67	1.26	0.6	1.05	0.77	1.3	1.33	1.66	1.19	0.79	0.65	0.69	0.79	0.68	0.64	0.82	0.79	1.14	0.73	1.22	0.59	0.31	0.57	0.68	0.71	0.94	0.8	0.73	0.81	0.61	1.05	1.15	0.75	0.69	0.56	1.06	0.67	0.49	0.57	0.53	0.57	1
XLOC_000376	0.08	0.12	0.09	0	0.13	0.09	0.05	0.05	0.15	0.19	0.37	0.07	0.34	0.33	0.8	0.35	0.12	0.07	0.15	0.07	0.39	0.34	0.3	0.22	0.1	0.14	0.1	0.15	0.43	0.38	0.68	0.8	0.13	0.81	0.6	0.45	0.55	0.74	1.27	0.8	0.06	0.06	0.19	0.24	0.24	0.08	0.48	0.29	0.11
XLOC_000377	0.28	0.08	0.04	0.04	0	0	0	0	0	0	0.09	0	0	0	0	0	0	0.04	0.06	0.05	0.05	0	0.04	0.19	0	0.06	0.03	0.18	0	0.24	0.06	0.1	0	0.04	0.05	0.06	0.19	0	0.13	0.06	0	0	0	0.11	0	0.03	0	0.15	0.32
XLOC_000378	0.15	0.25	0.13	0	0	0.03	0.03	0.16	0.13	0.41	0.33	0.31	0.82	0.31	0.1	0.34	0.06	0.05	0.22	0.22	0.23	0.18	0.06	0.03	0.17	0.04	0.08	0.1	0.02	0.09	0.3	0.25	0.48	0.3	0.59	0.25	0.16	0.27	0.26	0.33	0.04	0.28	0.43	0.19	0	0.13	0.2	0.22	0.12
XLOC_000379	0	0	0	0	0	0	0	0	0	0	0.04	0	0.11	0	0.06	0	0.22	0.18	0.18	0.07	0.61	0.3	0.39	0.24	0.52	0.1	0.02	0.29	0.11	0	0	0.04	0.23	0.31	0.07	0	0	0	0.08	0	0.66	0.25	0.63	0.25	0.44	0.21	0.53	0.14	0.2
XLOC_000380	0	0	0	0	0	0	0	0	0	0	0	0	0	0.02	0.02	0	0.03	0.14	0	0.07	0.17	0.14	0.06	0	0	0	0	0	0	0.02	0	0	0.06	0.06	0	0.11	0	0	0	0	0.13	0	0.09	0.15	0.25	0.02	0.15	0.08	0
XLOC_000381	0.78	0.41	0.62	0.57	0.82	0.27	0.41	0.36	0.3	0.28	0.51	0.43	1.15	0.39	0.44	0.65	0.19	0.18	0.13	0.17	0.45	0.08	0.12	0.21	0.09	0.2	0.32	0.11	0.23	0.36	0.16	0.32	0.26	0.13	0.27	0.27	0.61	0.34	0.34	0.27	0.2	0.12	0.22	0.23	0.6	0.16	0.11	0.4	0.27
XLOC_000382	0.74	0.7	1	0.83	0.62	0.85	0.89	1.21	1.4	1.16	1.1	0.88	0.97	1.29	0.97	0.91	0.91	0.85	0.89	0.75	0.43	1.03	1.1	0.69	0.49	0.38	0.77	0.45	0.39	0.71	0.66	0.36	0.97	0.61	0.71	0.84	0.66	0.89	0.69	0.59	1.09	0.55	0.65	0.75	0.9	0.77	0.82	0.95	1.09
XLOC_000383	0.32	0.32	0.31	0.25	0.51	0.34	0.34	0.28	0.02	0.22	0.16	0.06	0.23	0.15	0.03	0.24	0.19	0.05	0.2	0.17	0.08	0.24	0.13	0.24	0	0.06	0.16	0.18	0.13	0.14	0	0.09	0.12	0.12	0.08	0.19	0.02	0.04	0.14	0.24	0.16	0.16	0.47	0.21	0.16	0.2	0.39	0.11	0.18
XLOC_000384	1.48	1.47	1.37	1.03	1.08	1.75	1.3	1.1	1.15	0.67	1.29	0.96	1.16	0.98	0.78	0.89	1.14	0.76	1.08	0.99	0.63	1.27	1.22	1.39	0.75	0.78	0.57	0.95	0.34	0.43	0.82	0.69	0.84	0.75	0.54	0.51	0.87	0.87	1.14	0.52	0.94	1.11	1.41	1.4	1.39	1.95	1.65	1.59	0.78
XLOC_000385	1.95	2.72	1.85	2.34	1.98	1.7	1.57	1.82	1.13	1.21	1.42	1.28	1.33	1.17	0.82	1.18	1.39	1.17	1.24	1.23	1.5	0.93	0.92	0.89	1.08	0.96	0.78	1.18	0.91	0.7	0.65	0.93	0.99	1.09	1.05	0.92	1.01	0.91	0.72	1.16	1.56	1.42	1.8	1.92	1.32	1.02	1.66	1.55	1.65
XLOC_000386	0.76	1.01	1.05	1.14	1.07	1.07	0.88	1.06	0.44	0.38	0.55	0.36	0.7	0.69	0.65	0.62	0.42	0.56	0.46	0.58	0.6	0.74	0.68	0.76	0.35	0.39	0.71	0.33	0.4	0.41	0.26	0.51	0.34	0.36	0.59	0.45	0.43	0.61	0.65	0.66	0.42	0.64	0.73	0.75	0.66	0.61	0.6	0.58	0.56
XLOC_000387	0.4	0.32	0.28	0.72	0.59	0.31	0.47	0.38	0	0	0	0	0	0	0	0	0.01	0	0	0	0.01	0.03	0.04	0.02	0	0	0.03	0	0.04	0	0	0	0.04	0	0	0	0	0	0	0	0	0	0.02	0	0.02	0	0	0.01	0
XLOC_000388	0	0	0	0	0	0	0	0	0.14	0.06	0.15	0.03	0.29	0.17	0.07	0.07	0.5	1.27	0.12	2.25	0.32	1.08	1.7	1.42	0.13	0.91	0.57	1.79	0.07	0.32	0.92	0.84	0.21	0.04	0	2.03	0	0.25	0.07	0.13	0.1	0.26	0	0.18	0	0	0	0	0.27
XLOC_000389	0.39	0.05	0.06	0.25	0	0.2	0.11	0.17	0.46	0.45	0.65	0.75	0.57	1.02	0.39	0.89	0.36	0.36	0.16	0.04	0.21	0.05	0.44	0.17	0.18	0.43	0.24	0.04	0.02	0	0.06	0	0.54	0.17	1.14	0.35	0.51	0.69	0.64	0.58	0	0.02	0.31	0.02	0.05	0.14	0.13	0.05	0.71
XLOC_000390	0	0	0	0	0	0	0	0	0	0	0	0	0	0	0	0	0	0	0	0	0	0	0	0	0	0	0	0	0	0	0	0	0	0	0	0	0	0	0	0	0	0	0	0	0	0	0	0	0
XLOC_000391	0.08	0.07	0.04	0.1	0	0.07	0.04	0.02	0.11	0.1	0.11	0.23	0.19	0.34	0.24	0.12	0.4	0.1	0.08	0.3	0.2	0.2	0.02	0.11	0.31	0.32	0.12	0.18	0.3	0.45	0.4	0.06	0.19	0.12	0.02	0.3	0.14	0.47	0.26	0.12	0.22	0.14	0.05	0.21	0.09	0.11	0.14	0.03	0.12
XLOC_000392	0.15	0.2	0	0	0.15	0.35	0.05	0.13	0	0.18	0.63	0.03	0.08	0.11	0	0.06	0.12	0.04	0.05	0.05	0	0.06	0	0	0	0.08	0.34	0.03	0.03	0	0	0.31	0.18	0	0	0	0.09	0.05	0	0	0.58	0.19	0.28	0.03	0.03	0.03	0	0	0
XLOC_000393	0.08	0.05	0	0.06	0.04	0.1	0	0.03	1.52	0.39	0.02	1.72	0.57	0.09	0.22	0.34	0.45	0.11	0	0.61	0.99	0	0.19	0.1	0.37	0	0.02	0.71	0.46	0	0	0.36	0.23	0.12	0.04	2.07	0.64	0.45	0.27	1.1	0.04	0.06	0.09	0.53	0.3	0	0.11	0.29	0.62
XLOC_000394	0	0	0	0	0	0	0	0	0.15	0.1	0.02	0.06	0.16	0.1	0.04	0.04	0	0.03	0.04	0	0	0	0.09	0	0	0	0	0	0	0	0.27	0	0.05	0	0	0.04	0	0.19	0.04	0	0	0	0	0	0.15	0	0	0	0
XLOC_000395	0	0	0	0	0	0	0	0	0	0	0	0	0	0	0	0	0	0	0	0	0	0	0	0	0	0	0	0	0	0	0	0	0	0	0	0	0	0	0	0	0	0	0	0	0	0	0	0	0
XLOC_000396	1.29	1.83	1.93	2.06	1.73	2.13	1.75	2.87	1.59	1.47	0.98	1.75	2.73	2.99	2.94	1.48	1.12	1.44	0.52	0.92	1.15	0.8	0.84	1.35	0.79	1.2	0.48	0.53	0.44	0.79	0.56	0.98	2.35	2.26	1.14	2.46	1.68	1.17	2.18	1.51	2.53	1.13	1.13	0.94	2.06	1.33	1.1	0.99	1.17
XLOC_000397	0	0.06	0	0.09	0	0	0	0	0.12	0.13	0	0.15	0.04	0.03	0.12	0.12	0.19	0	0.02	0.05	0.03	0	0.07	0	0.39	0.1	0.03	0.01	0	0.11	0.01	0.1	0.15	0.08	0.14	0.15	0	0.13	0.13	0.15	0	0.01	0.04	0	0.11	0	0	0	0.06
XLOC_000398	0	0	0	0.04	0.1	0	0.05	0	0.49	0.43	0.12	0.08	0.38	1.78	0.24	0.91	0.76	0.34	0.15	0.12	0.14	0.56	0.24	0.63	0.11	0.21	0.29	0.08	0.02	0.29	0.04	0.72	0.2	0.55	0.24	0.02	0	0.08	0.09	0.17	0.21	0	0.01	0.05	0.02	0.24	0.21	0.67	0.2
XLOC_000399	0.46	0.36	0.45	0.25	0.37	0.23	1.13	0.4	0.19	0.41	0.12	0.14	0.07	0.03	0.74	0.24	0.06	0.07	0	0.1	0.05	0.05	0.58	0.05	0	0	0.03	0.07	0.04	0	0.32	0	0.05	0.25	0.42	0.31	0.1	0.06	0.76	0.03	0.02	0	0.15	0.02	0.05	0	0.31	0	0.15
XLOC_000400	0.28	0.18	0.57	0.5	0.79	0.86	0.7	0.73	0.13	0.09	0.16	0.09	0.06	0.06	0.27	0.07	0.02	0.01	0.02	0.04	0.03	0.05	0.04	0.01	0.04	0	0.03	0.08	0.13	0.06	0.06	0.04	0.13	0.28	0.25	0.34	0.17	0.17	0.38	0.19	0.05	0.02	0.14	0.06	0.02	0.08	0.09	0	0.03
XLOC_000401	0.84	0.76	0.91	1.4	1.19	0.68	0.3	1.11	0.41	0.39	0.22	0.25	0.81	0.26	0.23	0.43	0.58	0.33	0.57	0.23	0.42	0.51	0.44	0.24	0.65	0.26	0.24	0.39	0.12	0.17	0.23	0.09	0.34	0.35	0.22	0.27	0.12	0.58	0.38	0.53	0.49	0.05	0.39	0.47	0.44	0.34	0.44	0.47	0.53
XLOC_000402	0.17	0.15	0.15	0.2	0.29	0.19	0.24	0.25	0.45	0.51	0.22	0.45	0.37	0.38	0.37	0.51	0.33	0.29	0.37	0.24	0.21	0.28	0.24	0.29	0.24	0.14	0.16	0.22	0.09	0.16	0.12	0.18	0.5	0.36	1.02	0.52	0.55	0.78	0.6	0.73	0.25	0.13	0.25	0.18	0.12	0.16	0.22	0.17	0.3
XLOC_000403	0.11	0.12	0.05	0.11	0.45	0.3	0.39	0.44	0	0	0.09	0.22	0.21	0.16	0.45	0.18	0.14	0.23	0.11	0.17	0.13	0.26	0.31	0.15	0.12	0.04	0	0.02	0.2	0.17	0.43	0.13	0.08	0	0	0.07	0.27	0.29	0.2	0.6	0.33	0.04	0	0.21	0.27	0.19	0.24	0.1	0
XLOC_000404	2.31	2.51	2.29	2.43	3.2	2.84	2.66	2.16	1	1.03	1.06	0.99	1.27	1.36	1.34	0.87	1.02	1.06	1.35	1.18	1.39	1.3	1.52	1.08	0.86	0.77	1.06	1.02	1.02	1.09	1.26	0.79	0.98	0.78	1.41	0.98	1.18	1.11	1.58	0.74	1.02	1.13	1.12	1.25	1.45	1.3	1.44	1.02	1.15
XLOC_000405	0.32	0.81	0.72	0.7	0.7	0.47	0.71	0.73	0.42	0.5	0.49	0.49	0.68	0.47	0.64	0.58	0.39	0.49	0.67	0.42	0.64	0.22	0.57	0.71	0.36	0.55	0.43	0.65	0.31	0.45	0.6	0.27	0.35	0.3	0.42	0.38	0.44	0.43	0.55	0.57	0.32	0.5	0.55	0.38	1.22	0.47	0.94	0.39	0.53
XLOC_000406	0	0	0	0.01	0	0	0	0	0.56	0.59	0.43	0.4	0.14	0.11	0.18	0.21	2.09	1.79	2.13	2.85	1.99	1.85	2.05	1.96	1.96	1.17	0.79	1.75	1.23	1.17	0.4	1.25	1.03	1	0.51	0.25	0.02	0.95	0.23	0.27	0.99	1.58	0.42	1	0.88	0.61	0.16	0.89	1.78
XLOC_000407	0.01	0.05	0	0.01	0.01	0.02	0	0.04	2.02	1.59	2.01	1.75	0.72	0.55	0.56	1.54	7.06	7.2	6.25	7.61	5.72	5.76	4.13	7.3	5.36	6.42	3.08	5.84	5.66	3.92	2.42	4.51	2.8	3.34	1.29	1.05	0.86	1.36	0.68	0.7	2.42	3.07	1.28	2.4	2.89	1.55	1.46	1.68	4.55
XLOC_000408	1.01	0.59	1.37	1.17	0.81	1.17	0.76	0.89	0.57	0.41	0.65	0.43	0.69	0.7	0.87	0.5	0.35	0.57	0.83	0.59	0.43	0.51	0.8	0.45	0.46	0.43	0.66	0.54	0.55	0.49	0.1	0.3	0.6	0.51	0.51	0.48	0.42	0.61	0.34	0.54	0.52	0.76	0.54	0.54	0.44	0.74	0.99	0.68	0.54
XLOC_000409	0.49	1.58	1.11	0.88	1.15	0.9	0.45	1.25	0.76	0.29	0.22	1.04	0.86	0.9	0.55	0.32	0.48	0.7	0.12	0.48	0.56	0.67	0.29	0.42	0.31	0.44	0.17	0.29	0.12	0.18	0.46	0.49	1.16	0.5	0.29	1.02	0.21	0.38	1.21	0.42	0.48	1.15	0.1	0.34	0.51	0.56	0.21	0.17	0.83
XLOC_000410	0.45	0.34	0.58	0.47	0.37	0.41	0.57	0.44	1.4	1.35	1.36	1.37	1.42	1.48	0.99	1.44	2.08	1.68	1.89	1.96	1.51	1.82	1.49	1.57	1.78	1.81	1.45	1.39	1.47	1.6	1.27	1.33	1.43	1.35	0.93	0.99	1.16	0.85	0.99	0.7	2.73	2.04	1.67	1.64	1.68	1.7	1.66	1.73	2.14
XLOC_000411	0	0	0	0	0	0	0	0	0	0	0	0	0	0	0	0	0	0	0	0	0	0	0	0	0	0	0	0	0	0	0	0	0	0	0	0	0	0	0	0	0	0	0	0	0	0	0	0	0
XLOC_000412	0	0	0	0	0	0	0	0	0	0	0	0	0	0	0	0	0	0	0	0	0	0	0	0	0	0	0	0	0	0	0	0	0	0	0	0	0	0	0	0	0	0	0	0	0	0	0	0	0
XLOC_000413	4	2.72	3.8	3.14	3.95	2.26	2.29	2.5	4.93	4.03	4.55	4.64	5.52	4.7	3.37	4.48	4.83	4.23	4.25	4.62	3.92	3.59	3.13	3.47	5.29	4.59	4.42	4.31	4.84	3.64	2.93	3.95	4.51	3.81	4.28	3.13	4.03	2.64	2.85	3.05	5.15	4.47	4.57	3.84	4.42	3.78	2.67	3.75	4.77
XLOC_000414	1.32	1.07	1.4	1.02	1.23	1.23	1.28	1.53	1.53	1.13	1.09	1.46	1.51	2.75	1.53	1.87	1.07	1.29	0.71	1.29	0.68	0.9	1.04	1.11	1.1	0.83	1.24	1.13	0.92	1.4	0.42	1.08	0.84	1.13	0.98	1.19	0.72	1.13	0.9	0.61	1.27	1.36	1.53	1.35	1.51	1.39	1.41	1.39	1
XLOC_000415	0.12	0.04	0.02	0.08	0	0.05	0	0.17	0.17	0.19	0.23	0.2	0.46	0.4	0.32	0.23	0.27	0.06	0.1	0.19	0.07	0.19	0.08	0.16	0.3	0.11	0.06	0.1	0.15	0.19	0.1	0.11	0.24	0.21	0.07	0.02	0.14	0.06	0.09	0.16	0.23	0.07	0.04	0.05	0.05	0.17	0.1	0.06	0.16
XLOC_000416	0.15	0.22	0.12	0.02	0.07	0.21	0.15	0.44	0.48	0.26	0.22	0.32	0.46	0.88	0.79	0.49	0.29	0.2	0.17	0.22	0.69	0.87	0.8	0.72	0.28	0.3	0.57	0.46	0.37	0.23	0.62	0.14	0.18	0.19	0.34	0.29	0.39	0.54	0.57	0.12	0.14	0.16	0.07	0.14	0.19	0.19	0.33	0.1	0.15
XLOC_000417	1.2	0.99	1.61	1.25	0.87	2.49	1.81	1.93	0.23	0.64	0.64	0.75	0.32	1.49	0.52	1.06	0.15	0.31	0.63	0.37	0.26	1.02	0.5	1.15	0.51	0.14	0.44	0.49	0.18	1.38	0.73	1.03	0.45	0.53	0.27	0.42	0.27	1.29	0.81	0.76	0.79	1	1.09	1.47	0.7	2.11	1.19	2.78	0.73
XLOC_000418	0.73	0.82	0.44	0.74	0.53	0.73	0.81	0.42	0.73	0.48	0.48	0.7	0.81	0.94	0.57	0.67	0.72	0.61	0.25	0.45	0.49	0.63	0.5	0.78	0.46	0.42	0.48	0.36	0.47	0.61	0.3	0.42	0.69	0.58	0.25	0.6	0.55	0.67	0.56	0.35	0.76	0.82	0.42	0.63	0.96	0.61	0.63	0.64	0.71
XLOC_000419	0.31	1	0.62	0.39	0.27	0.67	0.36	0.27	0.28	0.06	0.01	0.07	0.01	0.06	0.02	0.02	0	0.04	0	0.05	0.13	0.07	0	0.05	0.03	0	0.08	0	0	0	0.01	0.17	0.12	0.14	0.23	0.05	0.05	0	0	0	0.2	0.08	0.11	0.01	0	0.13	0.02	0.09	0
XLOC_000420	1.14	1.48	1.45	1.31	1.18	1.8	0.96	1.91	0.45	0.53	0.34	0.26	0.19	0.21	0.24	0.52	1.42	0.4	0.85	0.43	2.14	1.05	0.76	1.34	0.24	0.19	0.43	0.21	0.68	0.43	0.33	1.12	0.43	0.56	2.29	1.87	2.08	2.14	1.41	1.1	0.2	0.23	0.4	0.15	0.65	0.72	0.61	0.7	1.81
XLOC_000421	1.38	1.64	1.59	1.96	1.46	1.75	1.68	1.63	0.81	0.59	0.75	0.77	0.68	0.58	0.58	0.6	0.7	0.82	1.14	0.76	0.9	0.7	0.67	0.69	0.59	0.85	0.71	0.74	0.67	0.62	0.9	0.93	0.78	0.73	0.93	0.77	0.68	0.47	0.78	0.83	0.99	0.98	1.27	1.06	0.92	0.6	0.98	0.89	0.8
XLOC_000422	20.32	22.19	17.66	24.08	20.27	20.87	20.76	19.99	11.88	11.07	12.41	11.5	11.04	10.55	8.48	8.64	19.93	15.26	18.33	17.98	16.38	16	15.18	14.25	17.57	14.17	12.07	13.51	12.68	12.73	14.67	13.13	12.96	12.12	11.71	10.73	11.11	13.46	10.92	8.92	20.84	18.55	14.13	16.36	15.95	16.32	15.8	14.1	17.48
XLOC_000423	1.82	0.66	0.96	1.44	0.96	1.15	1.22	1.92	1.11	0.55	0.58	0.63	0.76	0.67	0.62	1.46	0.76	0.8	0.71	0.34	0.63	0.68	0.56	1.5	0.39	0.38	0.47	0.47	1.05	0.25	0.3	0.95	1.12	0.62	0.92	0.34	0.78	1.01	0.97	1.66	0.69	0.58	0.71	0.78	1.16	0.8	1.05	1.09	0.55
XLOC_000424	1.31	2.24	1.97	1.78	1.53	1.66	1.63	2.79	1.04	0.94	1.01	1.06	1.07	1.12	1.06	1.77	1.06	1.52	1.35	1.04	0.9	0.98	0.82	1.76	1.53	1.96	1.3	0.93	1.01	1.11	0.56	1.73	2.39	2.7	1.07	2.23	1.2	1.17	1.1	1.21	1.68	1.62	1.14	1.54	0.86	1.01	0.87	1.89	1.29
XLOC_000425	0	0.38	0.17	0.38	0	0.14	0.15	0	0.24	0.21	0.25	0.09	0.22	0.09	0.49	0	0	0.29	0	0.23	0.36	0.2	0.06	0.34	0.5	0	0	0	0.2	0.05	0	0.15	0.06	0.36	0.75	0	0	0	0.65	0	0.09	0.09	0	0.24	0	0.44	0.11	0.16	0
XLOC_000426	0.13	0.23	0.11	0.14	0.13	0.38	0.12	0.16	0.17	0.31	0.11	0.45	0.11	0.6	0.16	0.24	0.08	0.17	0.18	0.03	0.33	0.28	0.22	0.22	0.03	0.03	0.04	0.12	0.06	0.17	0.25	0.06	0.13	0.08	0.17	0.03	0.09	0.19	0.27	0.12	0.14	0	0.04	0.26	0.23	0.12	0	0.09	0.14
XLOC_000427	0.06	0.45	0.13	0	0.94	0.31	0.06	0.58	0.35	0.22	0.25	0.48	0.36	1.19	0.27	0.17	0.09	0.47	0.49	0.23	0.27	0.36	0.38	0.15	0.17	0.2	0.51	0.25	0.04	0.47	0.1	0.04	0.48	0.13	0.45	0.47	0.83	0.5	0.14	0.34	0.2	0.1	0.17	0.24	0.39	0.25	0.12	0.2	0.14
XLOC_000428	0	0	0	0	0	0	0.07	0	0	0	0	0	0	0	0	0	0	0.11	0.08	0	0	0	0	0	0	0	0	0.51	0	0	0	0	0	0	0	0	0	0	0	0	0	0	0	0	0	0	0	0	0
XLOC_000429	0.04	0	0	0	0	0	0	0	0.11	0	0	0.02	0	0	0.04	0.25	0.03	0	0	0	0	0	0	0.07	0.02	0	0	0	0	0	0.1	0	0	0	0	0	0	0.16	0	0	0	0	0	0	0	0	0	0	0
XLOC_000430	0.16	0.41	0.31	0.25	0.51	0.74	0.58	0.41	0.21	0.71	0.57	0.28	0.4	0.29	0.36	0.28	0.35	0.66	0.48	0.54	0.73	0.74	0.71	0.68	0.27	0.67	0.73	0.55	1.03	0.51	0.93	0.55	0.41	1.01	0.46	0.3	0.47	0.57	0.75	0.4	0.49	0.89	1.02	0.83	1.15	0.62	0.64	0.63	0.45
XLOC_000431	0	0	0	0	0	0	0	0	0.03	0.32	0.03	0.16	0.03	0.09	0.03	0.06	0.08	0.04	0	0.45	0.14	0.06	0	0	0	0.14	0.06	0.03	0	0.09	0	0	0.04	0.11	0.05	0	0.04	0	0	0.52	0	0.11	0	0.05	0	0	0.14	0.07	0.06
XLOC_000432	0.09	0.12	0.1	0.21	0	0.08	0	0	0.05	0.05	0.28	0.09	0.02	0	0.05	0.05	0	0	0.22	0.3	0	0.16	0.14	0.23	0.27	0.1	0.4	0.28	0.17	0.05	0	0	0	0.13	0	0	0	0.09	0.1	0.05	0	0	0	0	0.11	0	0.06	0	0.1
XLOC_000433	1.81	2.11	1.67	1.3	1.23	2.19	1.18	1.29	0.83	1.18	0.8	0.74	0.72	0.96	0.71	0.53	0.8	0.94	0.72	0.82	0.44	0.73	0.65	0.55	0.66	0.92	0.92	0.52	0.49	0.86	0.51	0.43	0.76	1.06	0.78	0.5	0.4	1.08	0.74	0.61	1.04	1.46	0.99	0.8	1.03	0.9	0.8	0.9	0.96
XLOC_000434	1.26	1.53	1.36	1.03	0.94	1.6	1.04	1.04	0.67	0.71	0.55	0.59	0.42	0.63	0.62	0.45	0.59	0.71	0.78	0.69	0.37	0.72	0.65	0.41	0.59	0.5	0.79	0.31	0.38	0.82	0.51	0.39	0.78	0.75	0.87	0.72	0.47	0.88	0.53	0.54	1.36	1.02	1.17	0.79	0.69	0.8	0.75	1.07	0.69
XLOC_000435	0	0	0	0	0	0	0	0	0	0	0	0	0	0	0	0	0	0	0	0	0	0	0	0	0	0	0	0	0	0	0	0	0	0	0	0	0	0	0	0	0	0	0	0	0	0	0	0	0
XLOC_000436	0.26	0	0.04	0	0	0	0	0.09	0	0	0	0	0	0	0	0.15	0	0	0	0	0	0.06	0	0.04	0	0	0	0	0	0	0	0	0	0.08	0	0.1	0.09	0.75	0	0	0	0	0	0	0	0.16	0	0	0
XLOC_000437	0	0	0	0	0	0	0	0	0.05	0	0.03	0	0.02	0.01	0.01	0	0.4	0.95	0.13	0.8	0.5	0.33	0.35	0.42	0.44	0.36	0.18	0.46	0.47	0.1	0.03	0.15	0.19	0.52	0.02	0.01	0.02	0.01	0.03	0.02	0.12	0.16	0	0.03	0.02	0.01	0.04	0.02	0.56
XLOC_000438	0	0.02	0.02	0	0	0	0	0.03	0.01	0	0.06	0	0	0.01	0.02	0	0.43	0.35	0.11	0.08	0.02	0.02	0.04	0.04	0.39	0.19	0.03	0.08	0	0.03	0	0.03	0.14	0.18	0.05	0	0	0	0	0	0.75	0.65	0.02	0	0.06	0.11	0.2	0.01	0.47
XLOC_000439	0	0	0	0	0	0	0	0	0	0	0	0	0	0	0	0	0.04	0.16	0.06	0	0	0	0	0	0.09	0.09	0	0	0	0.07	0	0	0	0	0	0	0	0	0	0	0.25	0.34	0	0.06	0	0	0.11	0	0
XLOC_000440	0	0	0	0	0	0	0	0	0	0	0	0	0	0	0	0	0.22	0.02	0	0.06	0	0	0.05	0	0.04	0.11	0.04	0.08	0.04	0.02	0.09	0.26	0.19	0.1	0.03	0	0	0	0.07	0	1.97	1.25	0.34	0.05	0.29	0.04	0.18	0.17	0.36
XLOC_000441	0	0	0	0	0	0	0	0	0	0	0	0	0	0	0	0	0	0	0	0	0	0	0	0	0	0.08	0.03	0	0	0	0	0	0.07	0	0	0	0	0	0	0	0.13	0.32	0	0	0	0	0	0.03	0
XLOC_000442	0.42	0.1	0.14	0.46	0.38	0.7	0.35	0.48	0.25	0.32	0.28	0.41	0.35	0.67	0.36	0.53	0.12	0.25	0.19	0.11	0.24	0.05	0.55	0.33	0.32	0.06	0.11	0.08	0.34	0.34	0.27	0.33	0.22	0.09	0.14	0.3	0.33	0.48	0.67	0.48	0.36	0.3	0	0.31	0.46	0.51	0.71	0.39	0.22
XLOC_000443	0	0	0	0	0	0.19	0	0	0.3	0	0.08	0.04	0.04	0.12	0.08	0	0	0.1	0	0	0.13	0	0.29	0.13	0	0.08	0.12	0.27	0.14	0	0	0.32	0	0.38	0.28	0.14	0.38	0.68	0	0.33	0.49	0.08	0.08	0.07	0.04	0.22	0	0	0.17
XLOC_000444	0.5	0.76	0.86	0.55	0.69	0.37	0.53	0.55	1.77	0.92	0.54	1.78	0.8	1.49	0.77	1.39	0.51	0.5	1.1	0.72	1.09	1.13	1.33	0.73	0.8	0.7	0.85	1.03	0.56	0.72	0.52	0.36	0.84	0.98	1.02	0.8	1.2	1.16	1.35	1.05	0.9	0.96	1.37	1.06	1.63	1.14	0.97	1	1.4
XLOC_000445	0	0	0.08	0	0	0.03	0	0.13	0	0	0.21	0	0	0	0.04	0.17	0	0	0.11	0.07	0	0	0	0.44	0	0	0.29	0	0	0	0	0.09	0	0	0.21	0	0	0.11	0	0.37	0	0.04	0.04	0	0	0	0	0.35	0
XLOC_000446	24.28	22.21	22.21	24.42	25.56	30.68	23.64	27.57	14.39	13.48	14.08	11.72	8.33	7.73	7.58	9.84	22.05	13.29	17.82	22.73	21.04	18.29	16.75	17.96	18.89	17.34	12.59	17.42	15.06	15.24	15.26	13.48	15.55	15.75	16.67	14.42	14.02	18.28	12.54	11.72	18.38	15.11	13.71	17.58	17.33	14.74	14.91	15.02	20.89
XLOC_000447	2.24	2.73	1.64	1.81	1.64	1.91	1.29	1.57	1.16	1.16	1.47	1.18	0.98	1.02	1	1.13	0.85	0.66	0.87	1.11	0.7	1	0.79	1.04	0.9	0.9	0.8	1.04	0.83	0.63	1.18	1.37	1.4	1.42	1.89	1.68	1.37	1.54	1.54	1.42	1.47	0.83	1.89	1.61	1.03	1.12	1.27	1.4	0.75
XLOC_000448	0	0.02	0.07	0	0	0	0	0.06	0	0.12	0.03	0.15	0.03	0.11	0.02	0.06	0.12	0	0	0	0.12	0	0.15	0.03	0	0	0	0.12	0	0	0	0.18	0	0	0.18	0	0	0	0	0.29	0	0.3	0.18	0.02	0.02	0.21	0.07	0.69	0
XLOC_000449	0.25	0.17	0.18	0.4	0.68	1.63	0.46	0.67	0.37	0.13	0.03	0	0.07	0	0	0.15	0.39	0.04	0.51	0.31	0.11	0.76	0.15	0.54	0.11	0.93	0.88	0.75	0	0.64	0.3	0.42	0.18	0.05	0.12	0	0.11	0.13	0.07	0.07	0.14	0.34	0.81	0.82	1.12	2.08	0.81	1.19	0.57
XLOC_000450	0.42	0.11	0.87	0.82	1.23	1.9	1.1	1.5	0.2	0.16	0.34	0.29	0.19	0.21	0.06	0.15	0.48	0.26	0.55	0.71	0.53	0.79	0.18	0.52	0.7	0.46	1.05	0.83	0.89	1.41	0.41	0.78	0.46	0.12	0.44	0.5	0.31	0.59	0.19	0.35	0.71	0.28	0.66	0.48	0.75	1.23	0.58	0.94	0.49
XLOC_000451	0.1	0.16	0.03	0.04	0.28	0.08	0.11	0.32	0.11	0.03	0.09	0.11	0.06	0.23	0	0.21	0.07	0.03	0.07	0.26	0.09	0.44	0.08	0.41	0.08	0.01	0.04	0.01	0.04	0.77	0.03	0.25	0.28	0.27	0.2	0.14	0.14	0.1	0.39	0.54	0.08	0.07	0.16	0.25	0.18	0.2	0.06	0.32	0.11
XLOC_000452	0.24	0	0.04	0	0.29	0.23	0	0.11	0.21	0	0	0	0	0	0.1	0.12	0.25	0	0.06	0.06	0.03	0.07	0	0.13	0.13	0	0.08	0	0	0	0	0.04	0	0	0.08	0.06	0.15	0	0	0.07	0.26	0	0.05	0	0	0	0	0	0.34
XLOC_000453	0.2	0.01	0.05	0	0.11	0.01	0.01	0.04	0.04	0.04	0.27	0.01	0.05	0.06	0.02	0.1	0.18	0.09	0.3	0.03	0.07	0.1	0.39	0.2	0.12	0	0.21	0	0.06	0.04	0.46	0.2	0.14	0.15	0.15	0.05	0.07	0.11	0.05	0.11	0.1	0.08	0.19	0.19	0.14	0.09	0.26	0.62	0.05
XLOC_000454	0.37	0.37	0.17	0.15	0.54	0.24	0.38	0.33	0.03	0.22	0.05	0.1	0.02	0	0.05	0.13	0.07	0.1	0.56	0.36	0.04	0	0.44	0.08	0	0	0.08	0.24	0.23	0.41	0.57	0.28	0	0.07	0.04	0.09	0.24	0.19	0.05	0	0.15	0.1	0.59	0.26	0.33	0.08	0.16	0.34	0
XLOC_000455	0.11	0.06	0.05	0.11	0.04	0.29	0.06	0.1	0.01	0.04	0.2	0	0.02	0.09	0.02	0.03	0.73	0.11	0.34	0.2	0.22	0.27	0.25	0.33	0.29	0.3	0.03	0.22	0.03	0.09	0.3	0.37	0.1	0.12	0.06	0.11	0.19	0.19	0.05	0.05	0.15	0.09	0.33	0.11	0.11	0.11	0.2	0.23	0.2
XLOC_000456	5.06	5.12	4.4	4.52	6.4	5.64	5.57	6.14	1.42	1	1.17	1.04	1	0.88	0.71	1.09	0.56	0.27	0.42	0.64	0.36	0.68	0.61	0.77	0.68	0.39	0.38	0.74	0.74	0.56	0.57	0.38	0.58	0.45	0.89	0.66	0.88	0.86	0.5	0.84	0.69	0.38	0.49	0.85	0.78	0.66	0.53	0.88	0.61
XLOC_000457	0	0.06	0.03	0	0	0	0.04	0	0.03	0.15	0.05	0.05	0	0	0.03	0.03	0	0.07	0	0	0.04	0	0.15	0	0	0.08	0	0.02	0.18	0.06	0.05	0.03	0.03	0.04	0.09	0.09	0.04	0.05	0	0	0.16	0.05	0.08	0.1	0.14	0	0.36	0.03	0.05
XLOC_000458	0.5	1.28	0.98	1.7	0.6	1.02	0.93	0.35	0.14	0.51	0.29	0.61	0.48	0.48	0.41	0.19	0.19	0.33	0.23	0.43	0.32	0.43	0.66	0.08	0.16	0.58	0.37	0.25	0.18	0.26	0.78	0.08	0.13	0.32	0.24	0.49	0.16	0.14	0.51	0.14	0.13	0.51	0.22	0.63	0.34	0.29	0.75	0.24	0.19
XLOC_000459	0.39	0.48	0.18	0.29	0.11	0.33	0.38	0.12	0.13	0.18	0.17	0.19	0.07	0.13	0.2	0.2	0.09	0	0	0	0.08	0.03	0.09	0.12	0	0.01	0.01	0.01	0.06	0.04	0	0	0.2	0.15	0.23	0.27	0.02	0.26	0.18	0.03	0	0.05	0.1	0.06	0	0.08	0.03	0.05	0
XLOC_000460	0.85	1.63	0.64	1.62	0.26	0.5	1.31	0.4	0.6	0.35	0.6	0.24	0.19	0.38	0.4	0.39	0.31	0.45	0.14	0.57	0.32	0.05	0.14	0.31	0.3	0.07	0.13	0.19	0	0.29	0.05	0.52	0.49	0.23	0.38	0.52	0.15	0.32	0.62	0.71	0.44	0.59	0.1	0.02	0.58	0.05	0.36	0.36	0.25
XLOC_000461	6.67	7.31	7.24	7.38	8.51	9.85	7.16	7.45	6.37	7.62	8.01	6.77	8.01	7.37	6.67	7.16	5.9	5.79	8.19	6.89	7.22	8.2	8.1	7.08	7.43	7.11	7.89	6.22	7.72	8.45	11.83	8.03	6.9	7.01	7.79	5.38	6.13	6.85	7.4	6.27	11.44	11.31	14.27	9.17	11.24	13.62	11.26	11.63	5.77
XLOC_000462	2.39	2.41	2.35	2.48	2.85	3.83	2.57	2.67	2.14	1.69	2.1	2.29	2.21	2.08	1.6	2.37	1.5	1.79	2.88	1.73	2.47	2.58	3.06	1.79	1.2	0.75	2.02	1.76	1.47	2.09	2.18	1.12	1.83	1.66	2.05	2	1.53	2.62	2	1.65	2.36	2.88	3.38	3.77	2.09	4.12	2.65	3.17	1.79
XLOC_000463	0.43	0.12	0.43	0.64	0.17	0.37	0.51	0.34	0.28	0.22	0.29	0.36	0.51	0.34	0.21	0.3	0.07	0.46	0.3	0.37	0.39	0.21	0.34	0.18	0.22	0.09	0.26	0.18	0.29	0.46	0.46	0.08	0.19	0.19	0.24	0.13	0.7	0.09	0.1	0.48	0.19	0.47	0.12	0.26	0.13	0.15	0.38	0.26	0.1
XLOC_000464	0.12	0.09	0.24	0.23	0.18	0.1	0.2	0.19	0.33	0.34	0.18	0.17	0.19	0.2	0.27	0.15	0.18	0.23	0.26	0.23	0.36	0.28	0.26	0.33	0.13	0.27	0.14	0.24	0.23	0.21	0.2	0.08	0.23	0.17	0.29	0.43	0.43	0.44	0.5	0.49	0.15	0.03	0.18	0.17	0.38	0.17	0.25	0.17	0.07
XLOC_000465	0	0.01	0	0	0	0	0	0	0.03	0.09	0.06	0.24	0.13	0.16	0.07	0	0.07	0.05	0.3	0.05	0.11	0.13	0.07	0.07	0.11	0.02	0.28	0.24	0.05	0.07	0.22	0.3	0	0.01	0.05	0.09	0.03	0.05	0	0	0.08	0.02	0.12	0.12	0.15	0.02	0.05	0.11	0.14
XLOC_000466	0	0	0.09	0	0.03	0	0	0	0.07	0	0.05	0.04	0.07	0.05	0.02	0.12	0.13	0.1	0.39	0.06	0.17	0.12	0.07	0.2	0.19	0.05	0.1	0.05	0.16	0.05	0	0.11	0.21	0	0.12	0.01	0.04	0	0.03	0.08	0.4	0.04	0.19	0.01	0.21	0.03	0.12	0.15	0.33
XLOC_000467	0.03	0.04	0.05	0.04	0.03	0.02	0.04	0.04	0.37	0.37	0.35	0.43	0.55	0.41	0.48	0.56	0.65	0.65	0.38	0.46	0.55	0.41	0.49	0.56	0.59	0.66	0.23	0.41	0.25	0.21	0.25	0.24	0.53	0.4	0.12	0.28	0.31	0.27	0.41	0.29	0.62	0.84	0.23	0.37	0.4	0.33	0.32	0.3	0.85
XLOC_000468	0.2	0.19	0.07	0.18	0.1	0.09	0.05	0.29	1.27	1.3	1.85	1.57	1.17	1.1	1.29	1.14	2.34	2.83	1.58	2.09	1.25	1.4	1.54	1.62	1.67	1.91	1.52	1.89	0.64	0.79	1.07	0.92	1.4	1.99	0.81	1.4	1.16	0.92	1.48	2.19	4.08	3.86	1.13	1.86	0.98	0.83	1.8	1.71	3.11
XLOC_000469	0	0	0	0	0	0	0	0	0.38	0.2	0.17	0.26	0.44	0.28	0.15	0.22	0.55	0.47	0.5	0.8	0.69	0.6	0.39	0.61	0.24	0.36	0.52	0.4	0.14	0.36	0.53	0.4	0.24	0.28	0.26	0.11	0.23	0.06	0.25	0.31	0.75	0.45	0.24	0.33	0.36	0.1	0.37	0.07	0.25
XLOC_000470	0	0.03	0.05	0	0	0.13	0	0.03	0.11	0.18	0.25	0.3	0.26	0.17	0.12	0.15	0.17	0.19	0.53	0.55	0.31	0.27	0.6	0.61	0.42	0.04	0.21	0.53	0.35	0.52	0.38	0.39	0	0	0.11	0	0.13	0.19	0.22	0.21	0.08	0.1	0.25	0.44	0.64	0.41	0.41	0.31	0.21
XLOC_000471	12.79	12.65	19.25	15.25	16.37	16.62	15.72	17.39	24.29	24.87	29.45	28.36	33.3	35.96	31.45	35.29	25.85	34.72	33.19	27.52	28.56	28.87	27.05	27.33	23.6	21.87	32.33	26.87	27.69	28.73	32.76	31.54	23.01	24.9	26.84	22.79	24.69	24.3	29.7	24.34	23.06	25.19	30.22	28.97	25.67	32.74	30.39	33.05	26.17
XLOC_000472	0.33	0.21	0.68	0.69	0.77	0.49	0.46	0.27	0.3	0.3	0.7	0.52	0.64	0.75	0.47	0.56	0.41	0.44	0.55	0.32	0.14	0.29	0.24	0.39	0.31	0.35	0.74	0.36	0.26	0.31	0.38	0.17	0.13	0.31	0.27	0.71	0.32	0.2	0.1	0.25	0.2	0.23	0.29	0.92	0.43	0.38	0.46	0.44	0.47
XLOC_000473	8.14	7.95	10.3	10.23	14.46	17.18	14.76	14.21	7.2	7.24	7.9	8.78	8.62	10.33	8.78	8.66	5.23	5.55	10.05	8.18	9.72	11.81	9.93	9.1	5.53	4.73	11.03	8.36	9.73	10.78	16.57	12.25	5.65	4.48	5.62	5.9	6.03	6.52	7.29	5.86	9.22	9.18	14.51	13.44	12.87	16.46	14.53	14.99	7.11
XLOC_000474	12.35	11.27	16.81	14.17	19.85	23.09	21.98	20.2	16.37	17.91	19.18	22.04	21.04	22.51	22.68	23.51	13.56	15.07	21.64	19.72	18.79	27.61	24.23	20.14	16.2	14.74	23.91	20.15	24.75	32.13	39.62	28.93	12.09	12.01	14.45	11.84	17.57	15.19	17.76	15.48	18.68	17.86	31.03	25.99	28.77	36.53	38.6	33.32	16.54
XLOC_000475	0.86	0.84	0.86	0.66	0.54	0.44	1.03	0.91	0.55	0.5	0.47	0.77	0.95	1.35	1.15	0.59	0.46	0.36	0.23	0.51	0.22	0.22	0.36	0.4	0.36	0.54	0.3	0.33	0.17	0.42	0.21	0.31	0.62	0.49	0.37	0.62	0.29	0.72	0.43	0.37	0.19	0.63	0.27	0.75	0.45	0.7	0.38	0.31	0.64
XLOC_000476	0.76	1.1	1.4	0.83	0.76	1.19	1.18	0.91	2.24	2.76	2.59	1.7	2.01	2.35	2.1	2.26	1.33	1.34	1.75	1.39	1.64	1.59	1.9	1.76	1.73	1.68	2.06	2.47	1.98	2.04	2.05	1.57	1.94	2.19	3.37	3.03	2.64	3.64	2.84	2.75	1.53	1.84	1	1.56	1.49	1.53	1.65	1.31	1.22
XLOC_000477	0.36	0.43	0.5	0.36	0.42	0.42	0.39	0.46	1.39	1.28	1.4	0.75	1.07	1.26	1.3	1.2	0.62	0.47	0.65	0.57	0.62	0.76	0.73	0.73	0.59	0.61	0.91	1.04	0.71	0.61	0.65	0.38	0.93	0.96	1.78	1.46	1.13	1.94	1.55	1.67	0.65	0.53	0.6	0.53	0.48	1.12	0.82	0.62	0.55
XLOC_000478	1.4	1.42	1.49	1.42	1.3	1.41	1.15	1.1	0.59	1.02	0.91	0.78	0.86	0.57	0.6	0.45	1.02	1.06	0.95	0.99	1.09	0.57	0.62	1.1	0.98	0.77	0.88	1.01	0.56	0.49	1.96	0.55	0.39	0.61	1.02	0.65	0.6	0.44	0.68	0.44	1.33	1.28	1.37	0.88	0.97	0.77	1.16	0.63	0.88
XLOC_000479	3.84	4.35	4.02	4.09	4.06	3.77	3.85	5.08	3.2	2.81	3.36	4	3.72	3.95	3.78	3.83	2.55	3.1	2.58	2.22	2.98	2.19	2.42	2.6	2.01	2.41	2.51	2.17	1.75	2.27	2.06	2	3.25	2.98	2.47	2.42	1.79	2.26	2.59	2.94	2.96	3.25	3.25	2.69	3.04	2.15	3.55	2.56	2.87
XLOC_000480	0.64	1.44	1.16	0.95	0.04	0.97	0.66	0.28	0.5	0.72	0.86	0.55	0.15	0.82	0.38	0.37	0.4	0.63	1.59	0.43	0.36	0.73	0.48	0.21	0.32	0.95	1.63	0.73	0.15	1.27	0.99	1.11	0.09	0.8	1.5	1.14	0.17	1.41	0.47	0.41	0.71	1.3	1.71	0.63	0.55	1.62	1.39	0.6	0.86
XLOC_000481	0.09	0.16	0.07	0.31	0.09	0.1	0.17	0.04	0.14	0.09	0.17	0.15	0.11	0.03	0.12	0.13	0.67	0.2	0.31	0.16	0.27	0.26	0.28	0.02	0.51	0.17	0.38	0.12	0.12	0.17	0.16	0.19	0.29	0.12	0.22	0.11	0.2	0.58	0.16	0.26	0.44	0.22	0.09	0.26	0.28	0.34	0	0.36	0.26
XLOC_000482	0.14	0.18	0.05	0.05	0.2	0.12	0.5	0	0	0.07	0.21	0.21	0.11	0	0.11	0.12	0.16	0	0	0.2	0.12	0	0.16	0	0	0	0	0.07	0	0	0	0	0.05	0.05	0.19	0	0.23	0	0	0.08	0.49	0.11	0.04	0.17	0	0.2	0.23	0.09	0.08
XLOC_000483	0.92	1.05	1.1	1.64	1.67	1.11	1.47	1.5	0.94	0.98	0.89	1.2	1.06	0.62	1.12	1.15	0.75	0.84	0.81	1.21	1.03	0.68	1.04	0.8	0.72	0.89	0.82	1	0.94	0.77	1.25	0.99	0.92	1.09	0.92	1.68	0.8	1.05	1.17	1.67	1	0.93	1.05	1.41	1.17	0.94	1.24	1.09	0.79
XLOC_000484	0	0	0	0	0	0	0	0	0	0	0	0	0	0	0	0	0	0	0	0	0	0	0	0	0	0	0	0	0	0	0	0	0	0	0	0	0	0	0	0	0	0	0	0	0	0	0	0	0
XLOC_000485	0.35	0.24	0.22	0.1	0.06	0.25	0.28	0.35	0.21	0.33	0.18	0.19	0.26	0.05	0.14	0.14	0.31	0.25	0.35	0.24	0.76	0.22	0.53	0.29	0.05	0.05	0.08	0.26	0.39	0.21	0.19	0.09	0.09	0.06	0.1	0.16	0.05	0.22	0.26	0.02	0.22	0.14	0.27	0.36	0.37	0.32	0.63	0.16	0.15
XLOC_000486	0	0	0	0	0	0	0	0	0.04	0	0	0	0	0	0	0	0.17	0.05	0.43	0	0.13	0.44	0.06	0.25	0	0	0	0	0.18	0	0	0.26	0.47	0	0.2	0	0	0	0	0	0	0	0	0	0	0.04	0	0	0
XLOC_000487	2.64	2.61	2.05	2.44	1.46	1.85	2.2	2.68	1.77	1.81	1.59	1.77	1.43	1.82	1.51	1.26	1.38	1	0.85	1.09	0.72	0.97	1.01	1.31	0.9	0.84	0.81	0.9	0.93	0.73	0.87	1.36	1.29	1.18	1.36	0.96	1.11	1.34	1.5	1.47	0.68	1.38	0.96	1.44	0.74	0.91	1.16	0.56	0.9
XLOC_000488	0.47	0.42	0.08	0.45	0.15	0.05	0.43	0.05	0.21	0.49	0.49	0.22	0.25	0.5	0.29	0.36	0.32	0.48	0.21	0.41	0.19	0.38	0.29	0.04	0.2	0.43	0.29	0.3	0.46	0.09	0.42	0.13	0.11	0.85	0.83	0.41	0.22	0.59	0.66	0.12	0.14	0.49	0.23	0.13	0.06	0	0.18	0.32	0.29
XLOC_000489	0.84	0.99	0.87	1.21	1.18	1.01	1	0.84	0.62	0.75	0.68	0.96	0.85	0.63	0.82	0.61	0.53	0.82	0.53	0.71	0.7	0.4	0.69	0.49	0.58	0.54	0.39	0.75	0.46	0.51	0.65	0.66	0.62	0.81	1.07	0.95	0.88	0.76	0.74	0.54	0.56	0.6	0.49	0.72	0.41	0.35	0.51	0.56	0.61
XLOC_000490	0	0	0	0	0	0	0	0	0	0	0	0	0	0	0	0	0	0	0	0	0	0	0	0	0	0	0	0	0	0	0	0	0	0	0	0	0	0	0	0	0	0	0	0	0	0	0	0	0
XLOC_000491	0.49	0.62	0.68	0.68	0.79	0.99	0.52	0.65	0.27	0.18	0.32	0.2	0.31	0.34	0.25	0.19	0.12	0.15	0.21	0.31	0.28	0.23	0.17	0.24	0.06	0.25	0.3	0.18	0.17	0.15	0.16	0.32	0.15	0.4	0.28	0.17	0.18	0.14	0.22	0.19	0.13	0.34	0.32	0.09	0.31	0.15	0.18	0.39	0.12
XLOC_000492	2.4	2.65	2.34	2.7	2.3	2.48	2.63	2.3	1.18	1.02	0.99	1.33	1.43	1.61	1.18	1.43	0.94	1.09	1.23	1.15	1.2	1.88	1.31	1.41	1.19	0.7	1.07	1.1	0.91	1.15	1.44	1.06	1.15	0.87	1.24	1.25	0.84	1.49	1.4	0.81	1.35	1.04	1.17	1.5	1.05	1.69	1.31	1.57	1.22
XLOC_000493	0.11	0	0	0	0	0	0	0	0.12	0	0.03	0	0.03	0	0	0	0	0.08	0	0	0	0	0	0	0.36	0	0	0	0	0	0	0	0	0.08	0.4	0	0.23	0.55	0.12	0.3	0	0	0	0	0	0	0	0	0
XLOC_000494	0	0	0	0	0.11	0	0	0	0.24	0.04	0.37	0	0.04	0.19	0.02	0.07	0	0.03	0.08	0.07	0.03	0	0.42	0.13	0.08	0	0	0	0.02	0.09	0	0	0.08	0	0	0	0.1	0.23	0.09	0.08	0.06	0.02	0.11	0	0.18	0.05	0.08	0	0.08
XLOC_000495	0	0	0	0	0	0	0	0	0.23	0.03	0.04	0.06	0.17	0.07	0.25	0.17	0.93	0.06	0.05	0	0.02	0.1	0.08	0	0.79	0	0	0	0.05	0	0	0.02	0.3	0	0.12	0.03	0	0.05	0	0	0.19	0.03	0	0	0.11	0	0	0	0.18
XLOC_000496	0.19	0.03	0.09	0.06	0.07	0.21	0.04	0	0.09	0.17	0.11	0.09	0.09	0.07	0.09	0.22	0.28	0.16	0.1	0.09	0.18	0.03	0.04	0.25	0.2	0.27	0.34	0.32	0.24	0.07	0.1	0.3	0.3	0.2	0.05	0.09	0.06	0.15	0.03	0.14	0.15	0.36	0.34	0.24	0.04	0.25	0.1	0.25	0.25
XLOC_000497	0.12	0.19	0.58	0.39	0.3	0.43	0.28	0.49	0.43	0.23	0.43	0.2	0.37	0.24	0.17	0.34	0.12	0.15	0.06	0.27	0.28	0.67	0.15	0.34	0.35	0.07	0.29	0.26	0.25	0.68	0.08	0.28	0.33	0.55	0.58	0.51	0.13	0.7	0.32	0.94	0.36	0.32	0.85	0.26	0.93	0.35	0.23	0.25	0.42
XLOC_000498	1.38	1.7	0.96	1.26	1.88	1.32	1.04	1.62	0.33	0.41	0.45	0.53	0.68	0.31	0.17	0.46	0.25	0.28	0.45	0.39	0.39	0.45	0.43	0.61	0.22	0.11	0.48	0.31	0.8	0.39	0.25	0.58	0.49	0.6	0.79	0.9	0.89	0.8	0.64	0.99	0.47	0.33	0.42	0.51	0.86	0.3	0.43	0.45	0.45
XLOC_000499	0.06	0.25	0.04	0.31	0.12	0.24	0.11	0.3	0.02	0.03	0.14	0	0	0.1	0.12	0.09	0	0	0.12	0.09	0	0	0.12	0.13	0.02	0.33	0.19	0.16	0.25	0	0	0.15	0.37	0.16	0	0.39	0.05	0.16	0	0.07	0.07	0	0	0.12	0.09	0.02	0	0.19	0.1
XLOC_000500	0.73	0.76	0.39	0.91	0.49	0.72	1.17	0.53	1.04	0.96	1.32	0.7	0.69	0.85	0.72	0.88	1.79	2.11	1.78	1.36	1.66	1.72	2.13	1.82	1.58	1.79	0.66	1.16	1.42	0.89	1.5	1.32	0.97	1.23	1.32	1.3	0.88	2.11	1.12	0.94	0.83	1.3	0.9	0.69	0.83	1.19	0.77	0.96	1.4
XLOC_000501	1.3	2.05	1.78	1.87	2.35	2.58	2.21	2.29	0.49	0.58	0.64	0.78	0.63	0.72	0.56	0.86	0.92	1.12	1.29	1.22	1.28	1.39	1.14	1.1	0.6	0.44	0.95	1.01	0.75	0.96	1.2	1	0.88	0.68	0.52	0.61	0.78	0.88	0.88	0.62	1.06	1.01	0.94	1.29	1.41	1.42	1.97	1.43	1.18
XLOC_000502	0	0.12	0	0	0	0	0	0	0.03	0.05	0.14	0.26	0.05	0.07	0.07	0.05	0.07	0.03	0	0	0	0	0	0.04	0	0	0.07	0	0.03	0.11	0.21	0	0	0	0.08	0	0	0	0	0.2	0.05	0	0	0	0	0	0	0	0.1
XLOC_000503	0.03	0.02	0.02	0	0.07	0	0	0.12	0	0.07	0.02	0	0.2	0.04	0	0.04	0.03	0.17	0	0.03	0	0	0	0	0.08	0.17	0.1	0.04	0	0.08	0	0.04	0.15	0.08	0	0.03	0.03	0	0	0	0.08	0	0.06	0.12	0.04	0	0	0	0
XLOC_000504	0.04	0.08	0.3	0	0.44	0.35	0.04	0.04	0.07	0.06	0	0.07	0.13	0.09	0.07	0.09	0.25	0	0.12	0.04	0	0.2	0.29	0.11	0.02	0	0.07	0.09	0.03	0.15	0.02	0.08	0.09	0.12	0.19	0.16	0.07	0	0.1	0	0.7	0	0.34	0.02	0.29	0.07	0	0.11	0.09
XLOC_000505	0	0	0	0	0	0	0	0	0	0	0	0	0	0	0	0	0	0	0	0	0	0	0	0	0	0	0	0	0	0	0	0	0	0	0	0	0	0	0	0	0	0	0	0	0	0	0	0	0
XLOC_000506	0.21	0.14	0.61	0.33	0.37	0.32	0.13	0.04	0.04	0	0.04	0.04	0.04	0.16	0.22	0.04	0.07	0.03	0	0.05	0.11	0	0	0.06	0.01	0	0.04	0	0.18	0.07	0.03	0.04	0.2	0.1	0.22	0	0.04	0.29	0.08	0.29	0.09	0.04	0.21	0.14	0.31	0.11	0.06	0.21	0.13
XLOC_000507	0	0	0.02	0	0	0	0	0	0.55	0.88	1.61	1.19	1.67	1.68	0.99	0.73	0.43	0.26	0.98	0.07	0.26	0.11	0.05	0.1	0.34	0.16	0.14	0.12	0.03	0.05	0	0.12	0.47	0.65	1.34	0.53	0.79	0.81	0.81	0.78	0.72	0.82	0.23	0.14	0.12	0.16	0.06	0.18	0.33
XLOC_000508	0	0.02	0	0	0	0	0	0	0.13	0.03	0.16	0	0	0	0	0	0.04	0.08	0.11	0.03	0	0	0.04	0.24	0.03	0.09	0.05	0.03	0.22	0	0	0.3	0.04	0.14	0	0.08	0	0.03	0	0	0.02	0.06	0	0.1	0	0.07	0	0	0.09
XLOC_000509	0.18	0.14	0.3	0.13	0.26	0.09	0.12	0.17	0.25	0.06	0.37	0.09	0.08	0.14	0.16	0.24	0.38	0.19	0.45	0.47	0.24	0.37	0.22	0.31	0.55	0.29	0.53	0.45	0.13	0.29	0.51	0.52	0.56	0.45	0.73	0.51	0.2	0.52	0.32	0.23	0.29	0.18	0.69	0.41	0.31	0.2	0.48	0.2	0.58
XLOC_000510	0.03	0.05	0.04	0.14	0.07	0.12	0.14	0.03	0.11	0.09	0.16	0.09	0.08	0.19	0.08	0.12	0.31	0.15	0.05	0.21	0.15	0.32	0.16	0.13	0.41	0.14	0.08	0.23	0.17	0.3	0.12	0.25	0.37	0.3	0.28	0.4	0.16	0.17	0.12	0.04	0.31	0.17	0.24	0.07	0.22	0.23	0.09	0.11	0.4
XLOC_000511	0.29	0.35	0.42	0.46	0.64	0.6	0.54	0.55	0.47	0.4	1.33	0.42	0.31	0.33	0.75	0.63	1.29	0.47	1.36	1.1	0.96	0.97	0.9	0.47	1.35	2.12	0.88	0.97	0.5	1.11	1.21	0.89	1.74	1.13	1.67	0.53	0.53	1.62	0.38	0.49	0.74	0.76	0.86	0.99	1.32	1.29	1.95	1.23	1.81
XLOC_000512	0.17	0.13	0.35	0.23	0.73	0.25	0.26	0.59	0.13	0.27	0.44	0.1	0.21	0.15	0.12	0.14	0.1	0.1	0.25	0.18	0.17	0.15	0.28	0.29	0.31	0.26	0.41	0.37	0.37	0.19	0.3	0.38	0.19	0.32	0.42	0.32	0.34	0.34	0.32	0.46	0.07	0.22	0.8	0.3	0.61	0.43	0.88	0.3	0.36
XLOC_000513	0	0	0	0.11	0	0.36	0	0.18	0	0	0	0	0	0	0	0	0	0.05	0	0	0	0	0	0	0	0	0	0	0	0	0	0	0	0	0	0	0	0.07	0	0	0.04	0	0	0	0	0	0.05	0	0
XLOC_000514	0	0	0.01	0	0	0	0.02	0	0.18	0.28	0.15	0.09	0.06	0.05	0.11	0.09	0.11	0.13	0.03	0.04	0.06	0	0.04	0.01	0.27	0.17	0.1	0.2	0.04	0.03	0.06	0.04	0.09	0.17	0.43	0.19	0.64	0.39	0.44	0.48	0	0.02	0.03	0.01	0.01	0	0.05	0	0.13
XLOC_000515	0.06	0.06	0.12	0.16	0.34	0.55	0.08	0.08	0.05	0.08	0.02	0.17	0.31	0.33	0.1	0	0	0.06	0.12	0	0.08	0.07	0.09	0.1	0.15	0	0.1	0.09	0.02	0.31	0.11	0	0	0.09	0.03	0	0.05	0.09	0.13	0	0.13	0.06	0.37	0.04	0.53	0.31	0.06	0.37	0.1
XLOC_000516	3.51	4.26	3.96	4.3	4.23	5.45	5.75	4.61	2.6	2.92	3.8	3.01	2.34	2.66	2.54	2.31	3.45	2.71	4.8	3.97	3.18	3.97	4.12	3.73	3.55	2.72	4.09	3.68	2.54	3.08	4.78	3.43	2.61	2.97	3.2	3.05	2.21	2.74	3.42	2.9	4	3.82	4.19	4.19	3.23	3.46	5.55	3.83	3.21
XLOC_000517	0.15	0.03	0.04	0	0	0	0.13	0.04	0.06	0	0.1	0	0	0	0.05	0.03	0.04	0.03	0	0	0	0.06	0.08	0.08	0	0.21	0	0	0.06	0.17	0.03	0	0	0	0	0	0	0.25	0.11	0	0.16	0.29	0.25	0.02	0	0.03	0.17	0.5	0
XLOC_000518	1.13	1.03	0.94	1.33	1.1	1.56	1.35	1.07	0.47	0.4	0.67	0.43	0.46	0.67	0.86	0.43	0.35	0.39	0.39	0.49	0.36	0.74	0.65	0.34	0.49	0.3	0.45	0.55	0.6	0.6	0.89	0.46	0.39	0.34	0.64	0.66	0.37	0.64	0.74	0.44	0.27	0.35	0.46	0.77	0.59	0.46	0.89	0.49	0.45
XLOC_000519	0.13	0	0	0	0	0	0.29	0	0	0.03	0	0.1	0	0	0	0	0.1	0	0.19	0.12	0.29	0	0.1	0.11	0	0	0.04	0.03	0	0	0	0.08	0.09	0.19	0.24	0	0.33	0	0.15	0	0.07	0.42	0	0	0.6	0	0.17	0.09	0
XLOC_000520	0.56	0.83	0.44	0.82	1.19	0.81	0.7	1.13	0.52	0.48	0.4	0.5	0.59	0.67	0.49	0.47	0.42	0.5	0.39	0.56	0.64	0.54	0.37	0.62	0.41	0.49	1.04	0.42	0.57	0.64	0.38	0.41	0.55	0.54	0.67	0.66	0.11	0.57	0.38	0.49	0.87	0.48	0.56	0.67	0.79	0.69	0.49	0.58	0.47
XLOC_000521	3.84	3.83	4.7	3.65	3.46	3.49	3.55	3.96	4.34	3.93	5.47	4.82	4.69	5.34	3.92	4.76	6.17	8.56	4.6	4.68	3.59	4.18	3.18	4.07	7.11	7.55	4.36	4.62	3.9	4.3	4.2	4.73	7.43	6.7	3.62	3.83	3.19	2.63	2.66	2.96	4.64	5	3.8	3.05	2.85	3.13	2.77	3.59	6.62
XLOC_000522	0.38	0.36	0.38	0.05	0.2	0.59	0.16	0.05	0.29	0.06	0.29	0.03	0.64	0.72	0.51	0.27	0.02	0.25	0.03	0.14	0.08	0.18	0.05	0.15	0.41	0.63	0.13	0.61	0.11	0.49	0	0.18	0.26	0.52	0.36	0.14	0.18	0.12	0.51	0	0.94	0.55	0.31	0.54	0.21	0.05	0.2	0.58	0.17
XLOC_000523	0.76	0.71	0.65	0.72	0.64	0.66	0.57	0.62	0.39	0.38	0.44	0.54	0.57	0.62	0.47	0.42	0.4	0.46	0.36	0.35	0.33	0.34	0.3	0.34	0.45	0.35	0.34	0.48	0.35	0.34	0.33	0.36	0.61	0.45	0.37	0.39	0.26	0.45	0.36	0.36	0.8	0.54	0.56	0.51	0.49	0.5	0.48	0.5	0.5
XLOC_000524	0.08	0.11	0.09	0.23	0.04	0.07	0.04	0.07	0.05	0.02	0.24	0.04	0.02	0.1	0.07	0	0.23	0	0.21	0.08	0.04	0.05	0.07	0.11	0.26	0.05	0.24	0.15	0.21	0.05	0	0.23	0.06	0.37	0.28	0.08	0.15	0.52	0	0.1	0.37	0.05	0.12	0	0	0.08	0	0.09	0
XLOC_000525	0	0	0	0.18	0	0	0	0	0	0	0.07	0	0	0	0	0	0	0	0.14	0	0	0.06	0	0	0.03	0	0.51	0	0	0	0	0.03	0	0	0.09	0	0	0	0	0	0	0	0	0	0	0	0	0	0
XLOC_000526	0.22	0.73	0.21	0.17	0.35	0.25	0.2	0.32	0	0.08	0.08	0.34	0.2	0.41	0.24	0.17	0.06	0.05	0.66	0.07	0.13	0	0.23	0.19	0.2	0.04	0.04	0.38	0.32	0.04	0.81	0.27	0.63	0.05	0.34	0.07	0.31	0.15	0.33	0.33	0.24	0.59	0	0.15	0	0.04	0.25	0.69	0.08
XLOC_000527	0.57	0.41	0.48	0.3	0.62	0.4	0.41	0.68	0.31	0.32	0.37	0.41	0.27	0.31	0.31	0.39	0.05	0.13	0.24	0.38	0.44	0.17	0.3	0.18	0.06	0.18	0.16	0.17	0.36	0.17	0.6	0.31	0.24	0.59	0.63	0.44	0.33	0.36	0.7	0.52	0.29	0.02	0.25	0.12	0.19	0.2	0.57	0.3	0.06
XLOC_000528	1.33	1.79	2.11	1.79	2.9	2.01	1.97	1.93	1.76	2	1.72	2.12	2.34	1.59	1.9	2	0.98	1.34	1.83	1.52	1.58	1.85	1.84	1.34	0.96	1.59	0.9	1.82	1.18	1.45	1.52	1.43	1.19	1.85	1.89	1.49	1.47	1.53	1.25	2.3	1.62	1.66	1.9	2.53	2.9	1.52	2.84	2.1	1.06
XLOC_000529	0.87	0.83	0.91	1.14	1.1	1.38	1.28	1.3	0.59	0.63	0.54	0.55	1.01	0.84	0.61	0.79	0.64	0.58	0.38	0.48	0.75	0.68	0.67	0.76	0.53	0.5	0.54	0.54	0.67	0.48	0.72	1.05	0.69	0.67	0.7	0.74	0.72	1.04	0.84	0.6	0.56	0.65	0.89	0.79	1.29	0.99	0.72	0.45	0.59
XLOC_000530	0.04	0	0	0.03	0.05	0.11	0.1	0.08	0	0.03	0.16	0	0.02	0.06	0.18	0.02	0.03	0	0	0	0.02	0.04	0.09	0.03	0	0	0	0	0	0.16	0.08	0	0.12	0	0.34	0	0.03	0.04	0.04	0	0.02	0	0.01	0.02	0.03	0.06	0.02	0	0
XLOC_000531	0.77	0.31	0.88	0.97	1.43	1.39	0.21	1.08	0.22	0.85	0.32	0.24	0.17	0	0.59	0.49	0.59	0.44	0.62	0.3	0.28	0.37	0.37	0.46	0.17	0.13	0	0.28	0.53	0.82	1.36	0.42	0.89	0.85	1.58	0.9	1.85	2.3	0.8	1.64	0.89	0.63	1.42	1.7	1.09	0.51	0.36	0.52	0.17
XLOC_000532	0.37	0.66	0.27	0.23	0.15	0.52	0.4	0.48	0.16	0.13	0.13	0.16	0.15	0.22	0.16	0.31	0.13	0.12	0.1	0.11	0	0.09	0.11	0.25	0.28	0.3	0.09	0.02	0.04	0.22	0.09	0.12	0.26	0.17	0.08	0.36	0.14	0.7	0.3	0.82	0.16	0.1	0.13	0.14	0.13	0.2	0.16	0.26	0.09
XLOC_000533	1.41	2.2	1.98	1.7	1.75	2.44	1.59	2.67	0.81	0.88	1.44	0.82	0.93	0.95	0.87	0.65	0.87	0.8	0.72	0.84	1.33	1.15	1.33	1.41	0.81	0.5	0.91	0.9	0.42	1.02	1.41	0.92	0.74	1.13	1.1	0.82	0.79	1.41	0.88	0.65	1.8	1.19	1.04	0.85	1.21	1.77	1.09	2.01	1.06
XLOC_000534	0	0	0	0	0	0	0	0	0	0	0	0	0	0	0	0	0	0	0	0	0	0	0	0	0	0	0	0	0	0	0	0	0	0	0	0	0	0	0	0	0	0	0	0	0	0	0	0	0
XLOC_000535	0	0	0	0	0	0	0	0	0.12	0.03	0.26	0.08	0	0.06	0.05	0.03	0.15	0	0	0	0	0	0.12	0	0	0	0	0	0	0	0.11	0	0.11	0	0.28	0.1	0.21	0.05	0.34	0	0	0.03	0	0	0	0	0	0	0
XLOC_000536	0.53	0.46	0.42	0.43	0.34	0.59	0.8	0.42	0.26	0.28	0.26	0.26	0.26	0.11	0.32	0.27	0.1	0.11	0.23	0.21	0.15	0.11	0.2	0.21	0.23	0.27	0.33	0.23	0.12	0.18	0.08	0.43	0.25	0.17	0.31	0.34	0.36	0.24	0.22	0.23	0.13	0.16	0.38	0.18	0.28	0.19	0.13	0.18	0.13
XLOC_000537	0.16	0.17	0.1	0.13	0.16	0.12	0.02	0.12	0.34	0.42	0.48	0.17	0.38	0.33	0.39	0.35	0.6	0.35	0.21	0.46	0.36	0.34	0.54	0.4	0.41	0.4	0.47	0.22	0.39	0.21	0.21	0.13	0.32	0.54	0.59	0.53	0.61	0.53	0.54	0.95	0.28	0.19	0.11	0.14	0.14	0.14	0.37	0.22	0.16
XLOC_000538	0	0	0.11	0.08	0	0.04	0	0	0	0.08	0.05	0.11	0.11	0.09	0.06	0.36	0	0.07	0.16	0	0.24	0	0.25	0.18	0	0.2	0.2	0.11	0.39	0.03	0	0.26	0.15	0.08	0.73	0.36	0.09	0.38	0	0.35	0.11	0	0.09	0.08	0.06	0.13	0.32	0	0.06
XLOC_000539	0.16	0	0	0.06	0	0	0	0.11	0.09	0.08	0.04	0.11	0.07	0.02	0.45	0	0.03	0.2	0.04	0	0.29	0.2	0.1	0.1	0.02	0	0.16	0.08	0.13	0.14	0.02	0.15	0.03	0.03	0	0	0.1	0.08	0.09	0.18	0.11	0.24	0	0.24	0.31	0.15	0.19	0.05	0.09
XLOC_000540	0	0	0	0	0	0	0	0	0.11	0.02	0.33	0.04	0	0.13	0.02	0.04	0.12	0.24	0	0.07	0.07	0	0.12	0.06	0.08	0.19	0.02	0	0	0.05	0	0.14	0.3	0.03	0.14	0.15	0.07	0	0	0.09	0	0.25	0.3	0	0	0	0.05	0	0.3
XLOC_000541	0	0.07	0.17	0	0	0.04	0.04	0	0.43	0.46	0.5	0.46	0.26	0.22	0.16	0.22	0.75	0.66	0.59	0.19	0.31	0.24	0.19	0.21	0.14	0.27	0.3	0.43	0.15	0.49	0.23	0.33	0.6	0.54	0.59	0.38	0.38	0.6	0.23	0.88	0.72	0.21	0.87	0.61	0.37	0.32	0.56	0.76	0.22
XLOC_000542	0	0.01	0.01	0	0	0	0	0	0.12	0.09	0.06	0.03	0.05	0.02	0.03	0.06	0.2	0.2	0.12	0.11	0.18	0.1	0.15	0.17	0.19	0.14	0.15	0.09	0.13	0.23	0.1	0.11	0.13	0.13	0.12	0.07	0.09	0.08	0.11	0	0.07	0.15	0.1	0.18	0.24	0.16	0.08	0.12	0.19
XLOC_000543	0	0	0.21	0.05	0.06	0	0.05	0	0	0	0.06	0	0	0	0	0.03	0	0.04	0	0	0	0.14	0.05	0.05	0	0	0	0.09	0.11	0	0	0	0	0.34	0	0	0	0	0	0	0	0	0.03	0.32	0.24	0	0.35	0	0.07
XLOC_000544	0.33	0.45	0.58	0.42	0.29	0.49	0.35	0.29	0.12	0.09	0.37	0.06	0.17	0.07	0.15	0.06	0.1	0.25	0.24	0.09	0.07	0.18	0.1	0.06	0.08	0.2	0.03	0.04	0.23	0.1	0.01	0.08	0.08	0.11	0.29	0.16	0.09	0.19	0.26	0.04	0.14	0.09	0.27	0.24	0.16	0.36	0.11	0.25	0.39
XLOC_000545	2.87	3.18	4.22	3.79	4.98	3.98	4.3	4.07	2.57	2.69	3.86	2.99	3.13	2.2	3.11	3.23	3.34	2.85	3.03	4.34	3.99	3.61	4.75	3.23	3.88	2.23	4.54	3.38	3.92	3.27	5.33	3.18	2.52	2.2	3.99	3.79	3.04	3.63	3.53	3.27	4.9	4	5.92	4.71	5.57	5.59	5.95	6.04	3.33
XLOC_000546	1.06	1.23	0.74	0.86	0.78	1.14	1.31	1.52	1.41	1.34	0.89	0.75	1.43	1.53	1.06	1.09	0.79	1.37	1.04	1.45	0.72	0.96	1.21	1.16	0.89	0.71	0.85	0.5	0.35	0.75	0.46	0.95	0.57	0.86	0.62	0.9	0.99	1.64	0.84	0.93	1.06	0.67	0.68	1.15	0.86	1.73	1.12	0.99	1.19
XLOC_000547	0.17	0.18	0.21	0.17	0.18	0.13	0.21	0.25	0.37	0.41	0.51	0.46	0.56	0.46	0.71	0.56	0.18	0.29	0.33	0.28	0.24	0.32	0.36	0.31	0.23	0.27	0.33	0.32	0.25	0.26	0.21	0.29	0.38	0.36	0.72	0.8	0.5	0.61	0.6	0.6	0.17	0.31	0.34	0.27	0.33	0.19	0.35	0.2	0.16
XLOC_000548	0	0	0	0	0	0	0	0	0	0	0	0	0	0	0	0	0	0	0	0	0	0	0	0	0	0	0	0	0	0	0	0	0	0	0	0	0	0	0	0	0	0	0	0	0	0	0	0	0
XLOC_000549	0	0	0	0	0	0	0	0	0	0	0	0	0	0	0	0	0	0	0	0	0	0	0	0	0	0	0	0	0	0	0	0	0	0	0	0	0	0	0	0	0	0	0	0	0	0	0	0	0
XLOC_000550	0.3	0.12	0.25	0	0.04	0.07	0.08	0.04	0.3	0.23	0.4	0.73	0.05	0.27	0.43	0.45	0.1	0.03	0.09	0.25	0.55	0.31	0.07	0.11	0.24	0.07	0.1	0.04	0.32	0.21	0.81	0.11	0.37	0.99	0.93	0.67	0.3	0.85	0.35	0.53	0.14	0.05	0.22	0.11	0.05	0.05	0.26	0.03	0.19
XLOC_000551	0.05	0.58	0.15	0.08	0.05	0.05	0	0	0.19	0.14	0.19	0.45	0.32	0.54	0.24	0.22	0.04	0.08	0.16	0.05	0	0.06	0	0.09	0.06	0	0	0.19	0	0	0.03	0	0.15	0.2	0.1	0	0.09	0.27	0	0.24	0	0.09	0.09	0.16	0.03	0	0.04	0	0
XLOC_000552	0.51	0.11	0.2	0.17	0.34	0.11	0.24	0.13	0.26	0.3	0.2	0.31	0.42	0.33	0.2	0.22	0.16	0.16	0.09	0.18	0.2	0	0.12	0.06	0.15	0.09	0.09	0.07	0.09	0.05	0.07	0.07	0.09	0.09	0.19	0	0.22	0.17	0.06	0.35	0.04	0.04	0.14	0.06	0	0.07	0.25	0.04	0.19
XLOC_000553	0	0	0	0	0	0	0	0	0	0	0	0	0	0	0	0	0	0	0	0	0	0	0	0	0	0	0	0	0	0	0	0	0	0	0	0	0	0	0	0	0	0	0	0	0	0	0	0	0
XLOC_000554	0.23	0.4	0.35	0.72	0.38	0.34	0.31	0.21	0.67	0.64	0.81	1.21	1.85	1.58	1.03	0.6	0.54	0.81	0.45	0.3	0.21	0.25	0.25	0.51	0.65	0.63	0.42	0.39	0.29	0.43	0.13	0.25	0.92	1.09	0.31	1.27	0.96	0.94	0.57	0.41	0.53	0.48	0.15	0.1	0.25	0.03	0.39	0.19	0.61
XLOC_000555	0.05	0.14	0.33	0.47	0.3	0.1	0.62	0.35	0.19	0.33	0.12	0.55	0.72	0.56	0.71	0.53	0.16	0.41	0.13	0.11	0.04	0.02	0.14	0.26	0.17	0.9	0.16	0.27	0.01	0.18	0.07	0.16	0.75	0.79	0.13	0.51	0.53	0.4	0.57	0.43	0	0.44	0.05	0.28	0.02	0.06	0.14	0.05	0.18
XLOC_000556	0.23	0.1	0.03	0.06	0.04	0	0.21	0.17	0.2	0.2	0.06	0.22	0.31	0.28	0.06	0	0.12	0.11	0.2	0.23	0.39	0.33	0.52	0.1	0.09	0	0.22	0.42	0.17	0.12	0.29	0	0.08	0.03	0.22	0.26	0.23	0.04	0.27	0.35	0.32	0	0.13	0.12	0.05	0.05	0.05	0	0
XLOC_000557	0	0.29	0.44	0.24	0.36	0.11	0.34	0.33	0.15	0.42	0.06	0	0.37	0.31	0.38	0.43	0	0.04	0.06	0.06	0.06	0	0.15	0	0.14	0.1	0.42	0.16	0.42	0.41	0.6	0.53	0.45	1.14	0.52	0.06	0.32	1.21	0.72	0.7	0.03	0.17	0.07	0.12	0.92	0.19	0.29	0.59	0.07
XLOC_000558	0.32	0.26	0.13	0.39	0.53	0.18	0.32	0.33	0.3	0.38	0.2	0.42	0.36	0.15	0.19	0.3	0.26	0.22	0.1	0.25	0.25	0.28	0.36	0.3	0.24	0.23	0.14	0.35	0.21	0.22	0.37	0.2	0.31	0.26	0.19	0.25	0.2	0.31	0.22	0.26	0.2	0.24	0.35	0.25	0.17	0.21	0.22	0.14	0.37
XLOC_000559	0.19	0.66	0.09	0.05	0.06	0	0.12	0.11	0.15	0.03	0.17	0.27	0.21	0.15	0.11	0.34	0	0.09	0.13	0.13	0	0	0.1	0.22	0	0.18	0	0	0.04	0	0	0.36	0.09	0.14	0	0.19	0.22	0.07	0	0	0.25	0.04	0	0.16	0.04	0.08	0.13	0	0.07
XLOC_000560	0.6	0.57	0.29	0.79	0.56	0.76	0.2	0.31	0.22	0.21	0.2	0.3	0.32	0.16	0.3	0.16	0.07	0.18	0	0.4	0.03	0.19	0.1	0.03	0.09	0.03	0.6	0.24	0.08	0.21	0.25	0.13	0.18	0.21	0.32	0.06	0.3	0.1	0.15	0.18	0.03	0.24	0.21	0.11	0.07	0.02	0.06	0.02	0.07
XLOC_000561	0.79	0.2	0.18	0.23	0.25	0.36	0.54	0.52	0.56	0.44	0.2	0.53	0.11	0.28	0.16	0.48	0.19	0.21	0.38	0.2	0.53	0.3	0.37	0.18	0.33	0.16	0.4	0.35	0.13	0.02	0.11	0.28	0.03	0.06	0	0.69	0.32	0.09	0.29	0.47	0.67	0.64	0.4	0.4	0.74	0.13	0.6	0.31	0.19
XLOC_000562	0.06	0.21	0.14	0	0.06	0.11	0.29	0.06	0.04	0	0	0.03	0	0	0.03	0	0	0	0	0.06	0.06	0	0	0	0	0.28	0.07	0.07	0	0	0	0	0	0.14	0.06	0	0	0	0	0	0	0.21	0.39	1.04	0.3	0.38	0.17	0	0
XLOC_000563	0.06	0.18	0.2	0.2	0.49	0.38	0.21	0.18	0.09	0.3	0.23	0.03	0.2	0.13	0.14	0.18	0.05	0.14	0.16	0.17	0.21	0.04	0.13	0.16	0.13	0.14	0.1	0	0.16	0.27	0.05	0.16	0.01	0.12	0.3	0.2	0.11	0.36	0.08	0.25	0.1	0.14	0.24	0.25	0.25	0.04	0.08	0.08	0.21
XLOC_000564	5.1	5.19	3.85	6.44	4.43	4.7	5.57	6.06	1.74	1.54	1.27	1.66	1.66	1.76	2.01	2.01	1.18	1.44	0.73	1.89	1.47	1.27	1.65	2.11	1.18	1.53	1.06	1.54	1.29	1.46	0.66	1.53	1.47	1.56	1.46	1.65	1.27	1.78	2.08	1.64	1.86	2.73	1.71	2.94	2.69	2.09	3.5	2.81	1.39
XLOC_000565	1.89	1.9	1.52	2.69	1.38	1.82	2.75	2.58	0.81	0.63	0.75	1.02	0.93	0.87	1.51	1.4	0.67	1.32	0.71	0.9	0.73	0.85	1.07	0.82	0.59	0.85	0.85	0.65	0.67	1.12	0.62	0.62	0.95	0.77	0.87	0.76	0.54	0.77	1.23	0.83	0.55	1.12	0.96	1.04	1.11	0.9	1.4	1.5	0.61
XLOC_000566	0.32	0.14	0.24	0.15	0.19	0.11	0.35	0.28	0.27	0.16	0.18	0.17	0.23	0.18	0.29	0.33	0.33	0.8	0.19	0.17	0.19	0.16	0.22	0.45	0.4	0.87	0.17	0.12	0.08	0.19	0.32	0.6	0.95	0.6	0.22	0.37	0.2	0.4	0.05	0.36	0.28	0.66	0.86	0.21	0.29	0.13	0.09	0.29	0.24
XLOC_000567	0	0	0	0	0	0	0	0	0	0	0	0	0	0	0	0	0	0	0	0	0.2	0	0	0	0.49	0	0.04	0.04	0	0	0.12	0	0	0	0	0	0	0	0.08	0	0	0	0	0	0	0	0	0	0.08
XLOC_000568	0	0	0	0	0	0	0	0	0.01	0.03	0.04	0.03	0.09	0.08	0.02	0.07	0.27	0.11	0.04	0	0.04	0.02	0.05	0	0	0.04	0	0	0	0	0	0	0.01	0	0.02	0	0.12	0	0	0	0	0.06	0	0	0	0	0	0	0.15
XLOC_000569	0.02	0	0.09	0	0.06	0.07	0	0	0.08	0.01	0.19	0.17	0.06	0.22	0.22	0.2	0.17	0.04	0.04	0.1	0.28	0.13	0.05	0.11	0.05	0.11	0.28	0.03	0	0.09	0	0.09	0.03	0	0.33	0.42	0	0.23	0.17	0.33	0.23	0.1	0.23	0.04	0.12	0.15	0.06	0.31	0.05
XLOC_000570	0.07	0	0.85	0.23	0	0	0	0.2	0	0.15	0	0.31	0	0.21	0.28	0.13	0	0.05	0	0.07	0.07	0	0	0.25	0	0.08	0	0	0.09	0	0.04	0	0	0.05	0.14	0.07	0.13	0.23	0.26	0	0	0	0.49	0.41	0	0.13	0	0	0.08
XLOC_000571	0.06	0	0	0	0	0.15	0	0.15	0.17	0.06	0	0	0.06	0	0.13	0.2	0.09	0.04	0	0	0	0	0	0.05	0.39	0.1	0	0	0	0.03	0	0.04	0.17	0.09	0.16	0.11	0	0.24	0.07	0.13	0.13	0	0.13	0	0.21	0.07	0.2	0	0
XLOC_000572	0	0	0	0	0	0	0	0	0	0.06	0.06	0.12	0	0	0.07	0.03	0.64	0.46	0.24	0.23	0	0.14	0	0.1	0.46	0.29	0.13	0.28	0.11	0.04	0.06	0.14	0.47	0.13	0.22	0	0	0.12	0.07	0	0	0.16	0	0	0	0	0	0.16	0.6
XLOC_000573	0	0	0	0	0	0	0	0	0	0	0	0	0	0	0	0	0	0	0	0	0	0	0	0	0	0	0	0	0	0	0	0	0	0	0	0	0	0	0	0	0	0	0	0	0	0	0	0	0
XLOC_000574	0.02	0.04	0.11	0.01	0.01	0.01	0.01	0	1.63	1.61	2.26	1.4	1.19	0.81	1.67	1.65	1.48	1.4	1.46	1.22	0.71	0.72	1.5	1.01	1.45	1.45	2.05	1.32	0.9	0.82	1.09	0.73	1.07	1.13	1.19	1.02	0.87	0.77	1.82	1.03	0.65	0.9	0.9	0.51	0.63	0.27	0.79	0.58	1.16
XLOC_000575	0	0	0	0	0	0.12	0.08	0	0.75	0.58	0.15	0.12	0.28	0.24	0.72	0.21	0.65	0.81	0.4	0.3	0.39	0.55	0.25	0.25	0.84	0.98	0.1	0.26	0.56	0.48	0.52	0.28	0.7	0.93	0.25	0.32	0.34	0.36	0.55	0.14	0.29	0.52	0.25	0.17	0.43	0.05	0.18	0.06	0.77
XLOC_000576	0	0	0	0	0	0	0	0	0	0	0	0	0	0	0	0	0	0	0	0	0	0	0	0	0	0	0	0.37	0	0	0	0	0	0	0	0	0	0	0	0	0	0	0	0	0	0	0	0	0
XLOC_000577	0	0	0	0	0	0	0	0	0	0	0	0	0	0	0.21	0.04	0	0	0	0	0	0	0	0	0	0.7	0	0	0.47	0	0	0.05	0	0	0	0	0	0	0.09	0	0	0.04	0	0	0.09	0	0	0	0
XLOC_000578	0	0	0.01	0	0	0	0	0	0.02	0	0.03	0	0.01	0.01	0	0	2.2	1.34	2.29	1.68	1.52	1.4	0.58	1.57	3.36	2.01	3.31	2.72	2.59	1.99	1.92	3.4	0.67	0.39	0.24	0	0	0.03	0.05	0.01	0.27	0.4	1.11	1.36	0.35	0.45	0.11	0.63	3.05
XLOC_000579	0	0	0	0	0.07	0	0	0.06	0.08	0.04	0.1	0.11	0.18	0.04	0	0	0.15	0.19	0	0	0	0	0.05	0	0.19	0.15	0.11	0.1	0.21	0.08	0.43	0	0	0.1	0	0	0.06	0.14	0	0	0	0.04	0	0.27	0.04	0.16	0.05	0.14	0.23
XLOC_000580	0	0	0	0	0	0	0	0	0	0	0	0	0	0	0	0	0.05	0	0.07	0	0	0.08	0.42	0	0	0.11	0	0	0.25	0	0.14	0.08	0	0.05	0	0	0	0	0	0	0.11	0	0	0.17	0	0	0	0	0
XLOC_000581	0.83	0.08	0.38	0.05	0.06	0.05	0.38	0.26	0.28	0.37	0.37	0.41	0.06	0.03	0.33	0.27	0.09	0.34	0.48	0.46	0.05	0.29	0.14	0.66	0.27	0	0.47	0.25	0	0.04	0.32	0.25	0	0.09	0.28	0.41	0	0.43	0.34	0.67	0.33	0.42	0.27	0.66	0.39	0.54	0.4	0.89	0.2
XLOC_000582	0.3	0	0.16	0	0	0.06	0.07	0.33	0.44	0.08	0	0.32	0.12	0.25	0.42	0.13	0.29	0.21	0.08	0	0	0.37	0.18	0.06	0.21	0	0	0.04	0.09	0	0	0.14	0.22	0.45	0.14	0	0.06	0.08	0.17	0.25	0.33	0.16	0.21	0.04	0.62	0.59	0.2	0.15	0.59
XLOC_000583	0.45	0.29	0.15	0.25	0.25	0.18	0.27	0.29	0.3	0.28	0.2	0.22	0.47	0.4	0.43	0.12	0.36	0.54	0.35	0.27	0.19	0.29	0.22	0.04	0.38	0.56	0.09	0.2	0.26	0.08	0.19	0.13	0.23	0.56	0	0.12	0.16	0.41	0.4	0.08	0.62	1.58	0.51	0.23	0.72	0.46	0.82	0.13	0.49
XLOC_000584	0	0	0.11	0	0	0	0	0.07	0.1	0.3	0.25	0.1	0	0.04	0.02	0.11	0.06	0.14	0.17	0.25	0.21	0.2	0.33	0.61	0.04	0.06	0.18	0.19	0.22	0.47	0.15	0.78	0.37	0.08	0.55	0.33	0.2	0.17	0.71	0.4	0.06	0.23	0.07	0.18	0.27	0.06	0.11	0.2	0.07
XLOC_000585	0	0	0	0	0	0	0	0	0	0	0	0	0	0	0	0	0	0	0	0	0	0	0	0	0	0	0	0	0	0	0	0	0.06	0	0	0.15	0	0	0	0	0	0	0	0.4	0	0	0	0	0
XLOC_000586	0	0.05	0.03	0	0	0.13	0	0	0.11	0.12	0.17	0.43	0.22	0.71	0.53	0.22	0.14	0.21	0	0.18	0.07	0.27	0.33	0.25	0.15	0.16	0.08	0.1	0	0.44	0	0.02	0.05	0.19	0.21	0.33	0.16	0.88	0.34	0.08	0.14	0.18	0.1	0.19	0.15	0.67	0.13	0	0.34
XLOC_000587	0.52	0.79	0.94	0.95	0.87	0.55	0.86	0.64	0.64	0.52	0.6	0.65	0.81	0.5	0.85	0.61	0.67	0.82	0.73	0.74	0.77	0.58	0.78	0.81	0.93	0.61	0.79	0.45	0.59	0.57	0.85	0.69	1.23	1.08	1.02	1.11	0.69	0.94	1.16	0.57	0.7	0.91	0.72	1.12	0.72	0.83	0.96	0.61	0.81
XLOC_000588	0.66	0.74	0.9	0.62	1.6	0.84	0.9	0.98	0.75	0.96	1.21	0.57	1.5	1.07	0.95	1.32	0.76	1.26	1.22	0.72	1.52	0.99	1.33	1.34	0.61	0.5	1.03	0.7	1.18	0.85	0.92	1.09	0.58	0.71	0.81	0.42	0.84	0.51	0.72	0.76	0.82	1.12	1.53	0.72	1.66	1.01	1.6	1.58	0.84
XLOC_000589	32.47	27.03	36.1	33.8	37.53	28.65	32.14	37.37	26.2	27.41	30.53	30.83	22.5	20.99	19.13	26.12	21.34	18.2	21.93	26.09	25.01	22.09	26.99	23.36	21.81	20.85	31.12	33.78	32.55	25.35	26.89	31.31	21.68	24.44	36.15	31.27	28.74	25.81	25.12	28.33	18.57	23.1	30.3	30.24	27.71	23.7	25.54	26.87	21.38
XLOC_000590	0.01	0.05	0.01	0.13	0.01	0.04	0.02	0.08	0.53	0.35	0.36	0.55	0.41	0.28	0.42	0.62	0.55	0.43	0.27	0.5	0.53	0.21	0.64	0.38	0.31	0.09	0.12	0.54	0.21	0.1	0.43	0.41	0.36	0.3	0.35	0.77	0.74	0.27	0.63	0.77	0.24	0.15	0.24	0.22	0.39	0.09	0.53	0.2	0.15
XLOC_000591	0	0	0	0	0	0	0	0	0	0.07	0.11	0.03	0	0	0	0.02	0.19	0.24	0.14	0.35	0.17	0.27	0.26	0.02	0.08	0	0.06	0.2	0.07	0.44	0.04	0.24	0.26	0.04	0.05	0	0	0.06	0	0.06	0	0	0	0.03	0.07	0	0	0.09	0.03
XLOC_000592	0.33	0.23	0.22	0.25	0.27	0.24	0.31	0.45	0.26	0.13	0.21	0.2	0.25	0.24	0.38	0.27	0.16	0.17	0.19	0.29	0.25	0.26	0.36	0.27	0.25	0.26	0.26	0.13	0.2	0.21	0.23	0.47	0.31	0.28	0.35	0.25	0.38	0.43	0.35	0.36	0.13	0.17	0.18	0.24	0.26	0.35	0.39	0.27	0.24
XLOC_000593	0	0	0	0	0	0	0	0	0	0	0	0	0	0	0	0	0	0	0	0	0	0	0	0	0	0	0	0	0	0	0	0	0	0	0	0	0	0	0	0	0	0	0	0	0	0	0	0	0
XLOC_000594	3.15	2.63	2.84	1.62	0.86	1.71	1.55	2.01	2.1	1.54	1.83	1.86	1.66	1.7	1.01	1.69	1.35	2.61	2.37	2.07	1.52	0.62	1.4	1	2.79	1.37	2.47	2.7	1.28	2.18	1.81	1.03	1.8	2.28	3.76	2.86	1.26	2.27	1.36	1.4	0.97	1.12	1.35	1.11	2.08	1.85	1.74	0.69	0.99
XLOC_000595	0.12	0.18	0.15	0.3	0.27	0.29	0.27	0.46	0.33	0.35	0.62	0.36	0.51	0.46	0.45	0.36	0.53	0.55	0.65	0.68	0.69	0.63	0.61	0.67	0.74	0.42	0.86	0.6	0.56	0.7	1.46	0.84	0.95	1.01	1.79	1.69	1.02	1.51	1.21	1.72	0.63	0.4	1.04	1.2	0.73	0.64	1.46	0.75	0.47
XLOC_000596	1.75	0.98	1.26	1.78	2.05	1.56	1.79	1.69	0	0	0	0	0	0	0	0	0	0	0	0	0	0	0	0	0	0	0	0	0	0	0	0	0	0	0	0	0	0	0	0	0	0	0	0	0	0	0	0	0
XLOC_000597	0.35	0.26	0.05	0.05	0.28	0.08	0.61	0.08	0.06	0	0.07	0.05	0.26	0.18	0.16	0.4	0.02	0.16	0.1	0	0.4	0.23	0.2	0.19	0.21	0.05	0.09	0.07	0.28	0	0	0.17	0.02	0.14	0.09	0	0.16	0.23	0.11	0.11	0.07	0.09	0.02	0	0.32	0.08	0.21	0.02	0.11
XLOC_000598	5.49	5.51	7.46	6.93	5.41	5.83	4.88	7.5	0.52	0.53	2.18	0.98	1.96	2.23	1.48	1.93	1.29	1.6	1.91	1.87	1.64	1.73	1.45	1.67	1.48	1.26	1.95	1.77	1.61	1.28	1.2	1.9	0.54	0.66	0.97	0.73	0.85	1.25	0.9	1.13	0.47	0.69	1.13	0.72	0.79	0.76	0.88	0.97	1
XLOC_000599	0	0.04	0	0	0	0	0.11	0.11	0.03	0	0	0	0.1	0	0	0.27	0	0.04	0	0	0	0	0	0	0	0	0.37	0	0	0	0	0	0	0	0	0	0	0	0	0	0	0.07	0	0	0.04	0	0	0	0
XLOC_000600	0	0	0	0	0	0	0	0	0	0.02	0	0	0	0	0.02	0	0.12	0.31	0	0.04	0.11	0	0.03	0.07	0	0	0.02	0.02	0.22	0	0	0	0.11	0.14	0	0	0	0	0.05	0	0	0.02	0.2	0	0	0	0	0	0
XLOC_000601	0.92	1.6	1.43	1.21	1.27	0.96	1.17	1.21	1.14	1.37	1.3	1.37	2.25	2.04	2.37	1.76	0.94	1.6	1.05	0.8	1.06	0.74	0.94	1.2	1.04	1.55	1.45	0.79	0.82	0.83	0.66	0.92	1.36	1.79	1.11	1.28	1.13	1.03	1.31	0.85	1.24	1.91	1.85	1.21	1.95	0.83	1.33	1.15	1.31
XLOC_000602	6.17	5.33	8.06	7.04	8.86	6.74	7.48	10.86	20.49	18.06	19.74	19	20.36	19.25	27.26	26.27	16.6	17.54	22.56	19.8	20.05	18.44	24.34	23.96	18.41	19.77	30.08	21.33	21.71	21.75	16.97	23.13	12.48	13.69	18.2	14.34	12.86	13.86	22.58	15.03	11.6	12.75	15.54	13.54	17.2	30.25	17.54	13.49	16.38
XLOC_000603	0.12	0.21	0.15	0.18	0.12	0.15	0.22	0.09	0.63	0.36	0.63	0.5	0.3	0.27	0.32	0.29	0.5	0.43	0.6	0.35	0.52	0.3	0.42	0.35	0.32	0.9	0.56	0.36	0.71	0.62	0.47	0.39	0.35	0.52	0.38	0.27	0.6	0.39	0.39	0.46	0.19	0.31	0.4	0.24	0.42	0.57	0.5	0.25	0.49
XLOC_000604	0.15	0.25	0.49	0.45	0.3	0.06	0.55	0.2	0.13	0.08	0.21	0.06	0.04	0.06	0.06	0.24	0	0.08	0	0	0.07	0	0	0.03	0	0.25	0.04	0.31	0	0.22	0	0.18	0	0	0.11	0.22	0	0.58	0.04	0	0.35	0.1	0.17	0.04	0	0.23	0.1	0.13	0
XLOC_000605	0.12	0.02	0	0.04	0.09	0.12	0	0	0.03	0.25	0.11	0.1	0.01	0.04	0.01	0.07	0.07	0.15	0.17	0	0	0.06	0.08	0.06	0.07	0.25	0.09	0.77	0	0.11	0.06	0	0.22	0.18	0.07	0	0.02	0	0.06	0	0.14	0	0.11	0	0.03	0.03	0	0.05	0.05
XLOC_000606	0.11	0.4	0.29	0.47	0.4	0.1	0.14	0.03	0.15	0.47	0.23	0.37	0.16	0.17	0.33	0.13	0.17	0	0.15	0.18	0.13	0.04	0.26	0.1	0.25	0	0.33	0.08	0.07	0.33	0.26	0.27	0.21	0.58	0.52	0.29	0.13	0.34	0.04	0.58	0	0.28	0.6	0.11	0.04	0.13	0	0.35	0
XLOC_000607	0	0	0	0	0	0	0	0	0.2	0.11	0.13	0.1	0.23	0.43	0.93	0.26	0.24	0.09	0.09	0.22	0.1	0.16	0.07	0.13	0.1	0.13	0.06	0.09	0	0.23	0	0.06	0.26	0.19	0.04	0.09	0.35	0.25	0.21	0.07	0.14	0.26	0.15	0.12	0.06	0	0.07	0.02	0.2
XLOC_000608	0	0	0	0	0	0	0	0	1.08	1.71	2.21	2.47	3.11	3.14	3.11	2.32	1.62	2.97	2.22	0.86	1.04	0.82	0.8	1.16	1.79	3.81	2.12	1.88	0.7	0.78	0.63	0.59	6.69	6.97	0.94	4.2	2.05	2.03	3.14	2.34	1.22	1.24	1.01	0.67	1.02	0.46	0.76	0.62	2.5
XLOC_000609	0.04	0.01	0.03	0.01	0.01	0	0	0.02	8.63	6.5	6.41	9.04	13.42	10.88	14.81	9.03	6.44	8.78	4.51	4.67	3.99	3.63	4.1	5.48	7.76	10.14	5.06	5.6	2.67	4.01	1.47	2.5	11.79	12.81	3.29	6.93	4.4	6.64	7.08	4.15	5.19	5.5	3.21	3.46	2.67	2.65	3.07	2.34	5.7
XLOC_000610	0	0	0	0	0	0	0	0	0.45	0.24	0.93	0.95	0.81	0.63	0.53	0.54	0.42	0.53	0.2	0.39	0.15	0.52	0.5	0.7	0.37	0.59	0.35	0.69	0.48	0.2	0.21	0.33	0.33	0.55	0.35	0.56	0.27	0	0.43	0.51	0.22	0.4	0.13	0.14	0.17	0.24	0.21	0.1	0.32
XLOC_000611	0.2	0.11	0.12	0.23	0.1	0.14	0.27	0.7	0	0.03	0.05	0.17	0.21	0.41	0.16	0.04	0.03	0.14	0.64	0.23	0.18	0	0.08	0.06	0.2	0.11	0.09	0.02	0.23	0	0.04	0.3	0.14	0.34	0.22	0.1	0	0.03	0.15	0.11	0.13	0.18	0.41	0.05	0.04	0.12	0.2	0.36	0.07
XLOC_000612	0.61	0.6	0.58	0.61	0.45	0.6	0.65	0.88	0.83	0.66	0.76	0.73	0.53	0.56	0.68	0.81	0.87	0.62	0.47	0.61	0.54	0.36	0.71	0.68	0.58	0.4	0.61	0.39	0.45	0.48	0.54	0.45	0.45	0.63	0.61	0.41	0.29	0.57	0.66	0.71	0.51	0.58	0.59	0.72	0.69	0.63	0.93	0.74	0.47
XLOC_000613	1.06	1.9	1.46	1.12	1.34	1.81	1.04	2.1	1.45	1.57	1.58	1.07	1.76	1.86	0.4	1.35	1.91	1.41	1.98	1.42	2.26	2.61	1.37	2.24	1.12	1.12	1.23	1.08	1.06	1.17	0.64	2.01	1.02	1.78	1.06	0.74	1.15	1.8	0.79	1.62	1.74	2.37	2.48	3.21	2.2	2.25	1.55	3.27	1.06
XLOC_000614	0	0.04	0.04	0.04	0.21	0	0.05	0.05	0.09	0.19	0.14	0	0.2	0.03	0.09	0.31	0	0.26	0.21	0.46	0.05	0	0.29	0.14	0	0	0.24	0.16	0	0	0.23	0.06	0	0.12	0.49	0.15	0.23	0.05	0.06	0	0	0.14	0.18	0.03	0.09	0	0.36	0.32	0
XLOC_000615	0	0	0	0	0	0	0.07	0	0	0	0	0.13	0.09	0.13	0.04	0.14	0	0	0	0	0.07	0	0	0	0	0	0.04	0	0.1	0.1	0	0	0.06	0.12	0.15	0.16	0	0	0	0.09	0	0	0.18	0.16	0	0	0.16	0.81	0
XLOC_000616	0.2	0.16	0.21	0.07	0.07	0.09	0.05	0.07	0.1	0.08	0.22	0.09	0.09	0.07	0.25	0.08	0.12	0.06	0.18	0.05	0.22	0.17	0.07	0.25	0.26	0.38	0.17	0.05	0.21	0.06	0.05	0.32	0.33	0.13	0.24	0.06	0.25	0.4	0.07	0.16	0.19	0.27	0.29	0.21	0.19	0.23	0.21	0.22	0.2
XLOC_000617	0	0	0	0	0	0	0	0	0.04	0	0.07	0.15	0	0	0.11	0.12	0	0.05	0.21	0	0	0	0.05	0	0	0	0.08	0	0	0	0	0	0	0.05	0.13	0	0.35	0	0.32	0.23	0	0	0	0.35	0	0.25	0.19	0	0
XLOC_000618	0	0	0	0	0	0	0	0	0.04	0	0	0	0	0	0.81	0.04	0	0	0	0	0	0	0	0	0	0	0	0	0	0	0.07	0	0	0	0	0	0	0	1.63	0.29	0	0	0	0	0	0	0.48	0	0
XLOC_000619	0	0	0	0	0	0	0	0	0	0	0	0	0.16	0	0	0	0	0	0	0	0.07	0	0	0.06	0	0	0	0	0.05	0.09	0	0	0.05	0	0	0	0	0	0	0	0	0	0	0.11	0.13	0.09	0	0.51	0
XLOC_000620	0.15	0.15	0.16	0.24	0	0.45	0	0.13	0.04	0.23	0.08	0	0	0.21	0.08	0	0.06	0.05	0	0.15	0	0	0.24	0.13	0.29	0.61	0.63	0.15	0	0.27	0	0	0.16	0	0	0	0.13	0	0	0	0	0.29	0	0.45	0.04	0.54	0	0.45	0
XLOC_000621	0.23	0	0.06	0.16	0.03	0.06	0.16	0.09	0.72	0.13	0.24	0.24	0.07	0.42	0.39	0.35	0.54	0.19	0.33	0.28	0.06	0.15	0.39	0.43	0.67	0.27	0.29	0.26	0.2	0.26	0.19	0.25	0.46	0.16	0.16	0.23	0.04	0.19	0.21	0.17	0.35	0.15	0.57	0.33	0.11	0.2	0.37	0.42	0.45
XLOC_000622	0.08	0.02	0.04	0.08	0	0	0	0.05	0.44	0.08	0.17	0.01	0.01	0.1	0.01	0.07	0.32	0.04	0.29	0.05	0.12	0.09	0.1	0.18	0.03	0.07	0.06	0.03	0.06	0.14	0.14	0.05	0.24	0.08	0.12	0.4	0	0.21	0.03	0.03	0.53	0.23	0.06	0.26	0.03	0.08	0.11	0.16	0.17
XLOC_000623	0.12	0	0.09	0	0	0	0	0.07	0.05	0	0.04	0.09	0.07	0.11	0.07	0.16	0.19	0.06	0	0.16	0.07	0.1	0.03	0	0.27	0	0.27	0.23	0.13	0.02	0.02	0.3	0.38	0.06	0.11	0	0	0	0.09	0	0.18	0.02	0.34	0.41	0.02	0	0.05	0.25	0.23
XLOC_000624	0.18	0.04	0.04	0.14	0.09	0.14	0.05	0.17	0.25	0.12	0.15	0.11	0.2	0.13	0.12	0.2	0.17	0.2	0.24	0.12	0.32	0.14	0.11	0.27	0.22	0.56	0.17	0.13	0.14	0.01	0.1	0.15	0.45	0.47	0.32	0.27	0.13	0.08	0.12	0.11	0.33	0.29	0.15	0.24	0.3	0.23	0.08	0.25	0.27
XLOC_000625	0	0	0	0	0	0	0	0	0	0	0	0	0	0	0	0	0	0	0	0	0	0	0	0	0	0	0	0	0	0	0	0	0	0	0	0	0	0	0	0	0	0	0	0	0	0	0	0	0
XLOC_000626	0.89	0.88	0.81	0.79	0.73	0.73	0.43	0.74	0.26	0.23	0.59	0.23	0.28	0.9	0.3	0.39	0.4	0.42	0.78	0.43	0.32	0.17	0.58	0.5	0.17	0.4	0.3	0.21	0.29	0.26	0.24	0.83	0.74	0.54	0.61	0.55	0.6	0.48	0.35	0.18	0.73	0.17	0.71	0.4	0.48	0.22	0.79	0.35	0.58
XLOC_000627	0	0	0	0	0	0	0	0	0	0	0	0	0	0	0	0	0	0	0	0	0	0	0	0	0	0	0	0	0	0	0	0	0	0	0	0	0	0	0	0	0	0	0	0	0	0	0	0	0
XLOC_000628	0.37	0.11	0.29	0.12	0.4	0.67	0.71	0.32	0.62	0.43	1.06	1.33	1.28	1.29	1.08	1.1	0.24	0.04	0.11	0.02	0.22	0.34	0.59	0.12	0.17	0.03	0.13	0.09	0.23	0.23	0.25	0.22	0.11	0.17	0.28	0.48	0.21	0.34	0.66	0.4	0.32	0.28	0.45	0.33	0.53	0.53	0.51	0.52	0.24
XLOC_000629	0	0	0	0	0	0	0	0	0	0.01	0	0	0	0.02	0	0	0	0	0	0	0	0	0	0	0	0	0	0	0	0	0	0	0	0	0	0	0	0	0	0	0	0	0	0	0	0	0	0	0
XLOC_000630	0	0	0	0.58	0.03	0	0	0	0	0	0	0	0	0	0	0	0	0	0	0	0	0	0	0	0	0	0	0	0	0	0	0	0	0	0	0	0	0	0	0	0	0	0	0.02	0	0	0	0	0
XLOC_000631	0.15	0.12	0.15	0.05	0.3	0.08	0.11	0.09	0.13	0.02	0.04	0.22	0.06	0.28	0.13	0.15	0.14	0.25	0.24	0.44	0.25	0.32	0.24	0.28	0.21	0.07	0.19	0.29	0.12	0.13	0.35	0.15	0.31	0.17	0.1	0.27	0.05	0	0.12	0.16	0.33	0.45	0.4	0.45	0.24	0.22	0.51	0.46	0.25
XLOC_000632	0	0	0	0	0	0	0	0	0	0	0	0	0	0	0	0	0	0	0	0	0	0	0	0	0	0	0	0	0	0	0	0	0	0	0	0	0	0	0	0	0	0	0	0	0	0	0	0	0
XLOC_000633	0.08	0	0	0	0.16	0.07	0	0	0	0.19	0.06	0.15	0	0	0.05	0	0.06	0	0	0	0	0	0.13	0.11	0.02	0	0.05	0	0	0.05	0.22	0.08	0.03	0	0	0	0	0.17	0.29	0	0	0.11	0	0.1	0.02	0.1	0.2	0.28	0
XLOC_000634	1.73	4.19	3.73	2.98	4.27	3.22	3.05	4.42	1.4	2.62	4.02	2.36	2.11	1.9	1.87	2.48	1.9	1.66	3.1	2.73	2.27	2.07	2.8	3.21	2.09	2.07	2.7	2.94	2.1	2.31	3	2.85	1.43	2.16	3.94	2.3	2.71	3.4	3.17	3.74	1.86	2.27	2.68	1.49	2.3	1.28	2.7	2.03	1.45
XLOC_000635	1.46	3.21	2.96	4.15	2.55	2.4	2.33	4.2	1.63	2.76	3.62	1.77	2.12	1.29	2.2	2.49	1.76	1.67	3.33	1.91	1.6	1.85	1.81	3.25	1.21	1.74	2.74	2.63	1.26	2.11	2.27	2.64	1.14	2.81	3.49	4.02	2.45	0.72	2.86	3.71	0.8	1.91	3.12	3.41	2.1	2.1	3.82	2.14	1.71
XLOC_000636	9.37	8.72	10.87	10.18	11.85	9.14	9.25	11.15	12.55	12.42	16.73	15.01	15.23	14.77	14.48	16.81	11.29	14.65	12.24	13.33	12.39	11.26	14.99	13.15	10.06	9.96	13.08	14.9	14.54	10.39	14.03	13.89	8.59	9.61	10.36	10.29	9.72	8.6	13.08	11.82	8.06	9.84	11.56	12.71	11.62	9.76	15.08	12.18	8.81
XLOC_000637	0.16	0	0.03	0.06	0	0	0	0.1	0.07	0	0.08	0.19	0.04	0.07	0.04	0.2	0.12	0	0.08	0.08	0.04	0.05	0.06	0.03	0.13	0.11	0.11	0	0.05	0.09	0	0.43	0	0.09	0.07	0.12	0.1	0	0	0.22	0	0.09	0	0.04	0.02	0	0.08	0.11	0.18
XLOC_000638	0.1	0.07	0	0.11	0	0.08	0	0	0	0	0.03	0	0.03	0.14	0.19	0.08	0	0.03	0.1	0.09	0	0.12	0.04	0	0	0.4	0.05	0.1	0.03	0.12	0	0	0	0.22	0	0.05	0	0	0	0	0	0	0.05	0.02	0.11	0.03	0.16	0.03	0
XLOC_000639	0.1	0.12	0	0	0.08	0.11	0	0	0.03	0.15	0.11	0.01	0.13	0.06	0.35	0.11	0.02	0	0	0	0.12	0.29	0.17	0.04	0.01	0	0	0	0	0.16	0.65	0.18	0.08	0.08	0.15	0.31	0.38	1.92	0.52	0.8	0	0	0	0.07	0.02	0.38	0.07	0.43	0.06
XLOC_000640	0.32	0.35	0.37	0.31	0.38	0.15	0.45	0.17	0.21	0.19	0.3	0.19	0.35	0.1	0.11	0.17	0.41	0.12	0.44	0.19	0.2	0.21	0.15	0.31	0.15	0.49	0.48	0.13	0.39	0.2	0.1	0.04	0.11	0.09	0.2	0.17	0.06	0.05	0.2	0.08	0.44	0.36	0.2	0.12	0.35	0.29	0.1	0.25	0.3
XLOC_000641	0	0	0.02	0	0	0	0	0	0.19	0.17	0.07	0.19	0.04	0	0.06	0.22	0.13	0.1	0.03	0.16	0.18	0.07	0	0.09	0	0.02	0.34	0.01	0.17	0	0	0	0.26	0.23	0.39	0.24	0.26	0.29	0.13	0.31	0.05	0.05	0	0.01	0	0	0	0.04	0.06
XLOC_000642	0.86	2.04	1.47	2.6	2.96	1.4	1.78	1.43	2.18	1.7	1.68	1.57	1.75	1.22	0.89	1.06	5.4	3.57	4.03	3.62	2.05	2.75	2.91	2.9	5.01	4.14	2.21	3.19	2.18	3.31	5.92	3.04	3.04	2.71	1.51	1.53	0.65	1.5	1.62	1.7	6.47	6.19	3.14	2.96	2.33	3.92	4.57	5.7	4.8
XLOC_000643	0.66	0.16	0.03	0.19	0.19	0.37	0.22	0.21	0.22	0.02	0.17	0.23	0.23	0.27	0.03	0.11	0.22	0.07	0.24	0.32	0.17	0.06	0.15	0.12	0.11	0.08	0.08	0.07	0.3	0.08	0.05	0.03	0.34	0.18	0.13	0.32	0.12	0	0.05	0.16	0.44	0.16	0.13	0.29	0.2	0.2	0.1	0.03	0.05
XLOC_000644	0.66	0.43	0.71	0.47	1.28	0.91	1.06	0.8	0.6	0.41	0.56	0.44	0.8	0.62	2.17	0.62	0.32	0.19	0.25	0.38	0.47	0.42	1.44	0.29	0.29	0.24	0.19	0.34	0.46	0.4	1.61	0.77	0.37	0.51	0.34	0.07	0.7	0.66	1.11	0.17	0.54	0.34	0.39	0.38	1.06	0.15	1.55	0.38	0.33
XLOC_000645	0.09	0.44	0.06	0.38	0.22	0.07	0.31	0.15	0.05	0.07	0.07	0.05	0.08	0.03	0.08	0.1	0.13	0.22	0.32	0.06	0.21	0.1	0.23	0.22	0.13	0.14	0.18	0.22	0.02	0.19	0.08	0.11	0.14	0.13	0.05	0.25	0.1	0.06	0.07	0.03	0.3	0.25	0.34	0	0.22	0.14	0	0.31	0.03
XLOC_000646	0.14	0	0.08	0.11	0.22	0.02	0.2	0.19	0.1	0.12	0.03	0	0.12	0	0.03	0.03	0.06	0.2	0.11	0.05	0.17	0.2	0.07	0.24	0.23	0.15	0.14	0.4	0	0.03	0	0.03	0.04	0.04	0.1	0.19	0	0.11	0	0	0.23	0.06	0.39	0.08	0.28	0.2	0.43	0.24	0.03
XLOC_000647	0.37	0.75	1.33	1.13	0.95	1.48	1.49	0.82	0.11	0.22	0.19	0.54	0.27	0.26	0.13	0.37	0.32	0.16	0.33	0.41	0.84	0.45	0.44	0.91	0	0.13	0.23	0.36	0.52	0.8	1.09	1.3	0.23	0.51	0.95	0.5	0	0.43	0.21	0.99	0.94	0.76	1.37	0.75	0.41	1.03	0.85	1.88	0.47
XLOC_000648	10.32	13.02	13.24	13.07	9.98	13	9.87	10.19	10.62	12.99	13.79	12.57	13.7	17.16	11.38	15.26	13.49	19.77	21.01	19.33	13.81	18.23	15.69	17.19	8.16	10.26	13.58	15.19	8.44	10.17	11.84	8.34	9.04	9.9	10.32	9.08	9.13	9.53	12.41	9.74	11.59	15.21	11.02	13.27	7.67	10.88	8.42	10.76	11.75
XLOC_000649	0.04	0.45	0	0.31	0.3	0.27	0.04	0	0.03	0	0	0	0	0.07	0	0	0	0	0	0	0	0	0	0	0	0	0	0	0	0	0	0	0.06	0	0	0	0	0	0	0	0	0	0	0	0.05	0	0	0	0
XLOC_000650	2.43	2.27	3.46	2.52	2.53	2.98	2.07	3.19	1.14	1.43	1.24	1.35	1.27	2.09	0.91	1.64	0.92	1.09	1.42	1.38	0.92	1.3	0.93	1.13	0.96	0.83	1.86	1.19	0.75	1.34	0.75	1.99	1.11	1.23	1.45	1.03	0.52	0.72	0.77	0.65	1.05	1.1	2.1	1.22	0.84	1.5	1.51	1.41	1.37
XLOC_000651	0	0	0.1	0	0	0	0	0	0.06	0	0.03	0	0.03	0	0	0	0	0	0	0	0.04	0	0.04	0	0	0.34	0.16	0	0.03	0	0	0	0	0.04	0.05	0	0	0	0	0	0	0	0	0.02	0.14	0	0	0	0
XLOC_000652	0.25	0.17	0.09	0.1	0.13	0.08	0.16	0.08	0.12	0.12	0.13	0.18	0.11	0.12	0.22	0.23	0.23	0.17	0.18	0.23	0.08	0.09	0.45	0.19	0.25	0.17	0.32	0.17	0.16	0.2	0.22	0.26	0.16	0.37	0.38	0.37	0.11	0.33	0.21	0.36	0.16	0.19	0.28	0.17	0.15	0.14	0.15	0.18	0.25
XLOC_000653	0.97	0.77	0.21	0.3	0.25	0	0.12	0.34	0.05	0.53	0.66	0.13	0.14	0.64	0.07	0.39	0.26	0.06	0.34	0.08	0.08	0.15	0.03	0.07	0.47	0.05	0.4	0.22	0.39	0.3	0.02	0.21	0.43	0.78	0.91	0.66	0.25	0.61	0.29	1.09	0.07	0.16	0.05	0.06	0.37	0.18	0	0.77	0.33
XLOC_000654	56.29	65.46	70.58	64.39	70.34	65.17	75.22	63.97	60.43	61.65	59.2	60.91	68.07	58.97	58.27	64.56	58.81	78.67	83.98	63.71	83.92	81.82	72.35	70.02	71.77	62.59	63.15	61.24	81.45	68.44	116.61	88.43	53.6	57.54	52.18	49.08	64.53	43.81	60.52	49.52	75.21	76.92	79.1	74.27	76.64	85.53	68.48	85.11	68.81
XLOC_000655	1.19	0.72	0.97	0.59	0.55	0.89	0.95	0.66	0.33	0.5	0.32	0.34	0.89	0.54	0.66	0.46	0.31	0.28	0.75	0.31	0.34	0.42	0.34	0.86	0.52	1.09	0.61	0.74	0.2	1	0.94	0.1	0.69	0.69	0.3	0.16	0.48	0.36	0.34	0.57	1.16	0.78	0.71	0.74	1.4	0.61	1.39	1.17	1.62
XLOC_000656	0	0	0	0	0	0	0	0	0	0	0	0	0	0	0	0	0	0	0	0	0	0	0	0	0	0	0	0	0	0	0	0	0	0	0	0	0	0	0	0	0	0	0	0	0	0	0	0	0
XLOC_000657	0.2	0.08	0.05	0.01	0.22	0.01	0.09	0.09	0.31	0.24	0.24	0.14	0.17	0.15	0.08	0.22	0.13	0.17	0.15	0.18	0.11	0.08	0.12	0.16	0.18	0.07	0.12	0.13	0.34	0.14	0.17	0.29	0.09	0.11	0.3	0.1	0.15	0.11	0.06	0	0.23	0.25	0.18	0.18	0.14	0.31	0.1	0.23	0.12
XLOC_000658	1.16	1.33	1.23	0.93	1.23	1	0.97	1.24	0.55	0.55	0.42	0.46	0.45	0.38	0.37	0.53	0.46	0.56	0.7	0.67	0.54	0.56	0.54	0.54	0.46	0.49	0.4	0.54	0.85	0.51	0.71	0.75	0.58	0.56	0.66	0.5	0.4	0.48	0.44	0.76	0.71	0.64	0.68	0.85	0.89	0.59	1.11	0.55	0.39
XLOC_000659	0	0	0	0	0	0	0	0	0	0.36	0	0.14	0	0	0	0	0	0	0	0	0.06	0	0	0.12	0	0	0	0	0.34	0	0	0	0	0	0	0	0	0.42	0	0	0	0	0	0	0	0	0	0	0
XLOC_000660	0.09	0.04	0	0.11	0.06	0.2	0.05	0.08	0.07	0	0.03	0.12	0.03	0.05	0.06	0.15	0.07	0.04	0.09	0.06	0.03	0.11	0.09	0.17	0.13	0.1	0.13	0.09	0.18	0.05	0.09	0.2	0.17	0	0.14	0.06	0.02	0.15	0	0.23	0.08	0	0.34	0.15	0.03	0.49	0.14	0.18	0.2
XLOC_000661	0.23	0.3	0.42	0.48	0.37	0.59	0.64	0.6	0.37	0.42	0.39	0.65	0.36	0.35	0.36	0.61	0.47	0.37	0.54	0.31	0.6	0.37	0.58	0.31	0.41	0.49	0.31	0.4	0.67	0.43	0.49	0.35	0.21	0.75	0.27	0.24	0.51	0.37	0.33	0.54	0.37	0.19	0.63	0.35	0.59	0.38	0.59	0.23	0.36
XLOC_000662	0.05	0.03	0.01	0.06	0.01	0.01	0.06	0.02	0.35	0.85	0.66	0.56	0.43	0.63	0.62	0.5	0.16	0.25	0.28	0.22	0.23	0.25	0.41	0.52	0.27	0.11	0.46	0.19	0.09	0.55	0.47	0.47	0.29	0.39	0.52	0.61	0.57	0.58	0.38	0.61	0.24	0.28	0.7	0.49	0.29	0.53	0.42	0.82	0.13
XLOC_000663	0.37	0.32	0.45	0.17	0.62	0.05	0.1	0.28	0.18	0.25	0.14	0.17	0.11	0.21	0.06	0.27	0.04	0	0.05	0.1	0.19	0.25	0.04	0	0.12	0.34	0.12	0.05	0.33	0.19	0	0.06	0.04	0.39	0	0.31	0.27	0.16	0.24	0.24	0.14	0.29	0	0.13	0.12	0.19	0.32	0.11	0.06
XLOC_000664	1.03	0.35	0.8	0.53	0.51	0.89	0.34	0.65	0.35	0.19	0.12	0.31	0.32	0.63	0.69	0.21	0.11	0.11	0.15	0.07	0	0.27	0.23	0.32	0.17	0.08	0.08	0.35	0	0.26	0	0.09	0.21	0.27	0.14	0.14	0.13	0.31	0.17	0.5	0.33	0.36	0.25	0.3	0.79	0.09	0.1	0.35	0.33
XLOC_000665	1.38	1.86	1.56	1.79	2.49	3.15	3.22	3.4	1.02	1.17	1.06	1.3	1.91	1.71	1.51	1.28	0.42	1.21	0.83	0.96	1.18	1.16	1.24	1.74	0.39	1.34	1.42	0.91	0.79	1.71	1.3	1.49	0.62	1.39	0.88	1.09	0.57	1.29	1.18	0.76	0.67	1.31	1.41	1.37	1.66	1.9	1.09	1.46	0.48
XLOC_000666	0.55	0.51	0.22	0.28	0.56	0.26	0.34	0.24	0.11	0.23	0.09	0.09	0.23	0.28	0.14	0.25	0.14	0.13	0.05	0.07	0.09	0.16	0.05	0.4	0.18	0	0.11	0.01	0.02	0.08	0.05	0.05	0.04	0.07	0.1	0.09	0.08	0.09	0.05	0.08	0.16	0.08	0.42	0.15	0.2	0.25	0.35	0.14	0.22
XLOC_000667	5.45	7.76	6.27	7.72	6.5	9.16	8.61	7.12	4.6	3	3.78	3.9	4.09	3.83	3.18	4.87	4.38	3.46	4.91	6.34	6.17	7.23	5.87	5.29	4.06	2.54	4.74	5.46	4.19	5.06	5.12	4.34	4.16	2.49	5.13	4.03	4.4	6.12	4.89	5.51	3.66	4.92	3.84	5.42	4.19	5.32	4.38	5	6.75
XLOC_000668	0.12	0.16	0.09	0.02	0.15	0.21	0.03	0.08	0.05	0.34	0.08	0.16	0.14	0.05	0.1	0.17	0.14	0.21	0.36	0.17	0.16	0.22	0.31	0.15	0.23	0.46	0.17	0.42	0.15	0.21	0.41	0.07	0.21	0.13	0.17	0.26	0.33	0.34	0.03	0.27	0.08	0.13	0.03	0.04	0.49	0.14	0.18	0.14	0.47
XLOC_000669	0	0	0	0	0	0	0	0	0.04	0.09	0.11	0.07	0.01	0.06	0.04	0.01	0.68	0.65	0.63	0.25	0.15	0.38	0.29	0.11	0.5	0.69	0.34	0.22	0.15	0.22	0.28	0.16	0.33	0.48	0.02	0.04	0.02	0.15	0.01	0.05	0.58	0.71	0.47	0.39	0.31	0.2	0.07	0.06	0.66
XLOC_000670	0.12	0.04	0.13	0.18	0.14	0.13	0.11	0.05	0.05	0.2	0.38	0.46	0.22	0.18	0.32	0.24	0.04	0.12	0.09	0.2	0.26	0.04	0.3	0.2	0.02	0.19	0.02	0.14	0.27	0.07	0.16	0.07	0.08	0	0.3	0.77	0.15	0.21	0.44	0.72	0.16	0.05	0.33	0.37	0.07	0.05	0.16	0	0.07
XLOC_000671	0.28	0.46	0.4	0.75	0.41	0.55	0.49	0.6	0.06	0.13	0.04	0.12	0.21	0.2	0.19	0.1	0.18	0.16	0.16	0.27	0.13	0.15	0.33	0.29	0.06	0.11	0.3	0.13	0.26	0.12	0.13	0.27	0.09	0.12	0.2	0.08	0.22	0.04	0.14	0.16	0.3	0.27	0.23	0.04	0.13	0.22	0.11	0.18	0.2
XLOC_000672	0.11	0.45	0	0	0	0.1	0	0	0.1	1.07	0.09	0.03	0.06	0.03	0.09	0.06	0	0.75	0.17	0.32	0.15	0	0	0	0.15	0.88	0.25	0	0	0.03	0	0	0	0.33	0.31	0	0	0.06	0.38	0	0.4	0.03	0	0	0	0.07	0.37	0	0.12
XLOC_000673	2.85	4.21	2.44	4.68	3.02	4.78	3.18	3.65	0.04	0.14	0.06	0.16	0.16	0.14	0.14	0.04	0.19	0.02	0.25	0.07	0.04	0.24	0.06	0	0	0.07	0.1	0.19	0.23	0.23	0.29	0.12	0.14	0	0.34	0.34	0.25	0.38	0.2	0.19	0.07	0.05	0.21	0	0.2	0.15	0.1	0	0.11
XLOC_000674	1.72	3.19	2.37	3.09	1.85	3.04	2.13	3.77	0.65	0.75	1.03	0.48	0.4	0.69	0.38	0.66	1.15	0.69	0.87	0.75	0.67	1.04	1.02	0.51	1.23	0.8	0.32	0.94	0.27	0.82	0.43	1.09	0.68	0.8	0.51	1.12	0.66	0.74	0.79	1.03	1.04	0.81	0.99	0.87	0.8	0.67	0.66	1.47	1.23
XLOC_000675	0.42	0.78	0.53	0.91	0.31	0.72	0.8	0.87	0.1	0.02	0.13	0.28	0.09	0.08	0.04	0.06	0	0.1	0	0.07	0.09	0.13	0.11	0	0.02	0	0.24	0.35	0.04	0.06	0.21	0.13	0.2	0	0	0	0.09	0.22	0	0	0.02	0.1	0.08	0.05	0.41	0.08	0.19	0.17	0.08
XLOC_000676	0.43	0.48	0.85	0.76	0.72	0.5	0.72	0.58	0.75	0.78	0.81	1.08	1.46	1.43	1.18	1.05	0.33	0.68	0.49	0.39	0.35	0.5	0.51	0.51	0.4	0.36	0.53	0.34	0.49	0.52	0.33	0.32	0.48	0.55	0.38	0.67	0.37	0.5	0.78	0.35	0.45	0.36	0.46	0.28	0.45	0.44	0.42	0.42	0.39
XLOC_000677	0.05	0.1	0.18	0.22	0.15	0.52	0.07	0.27	0.06	0.08	0.14	0.08	0.01	0.03	0.04	0.06	0.02	0	0	0.1	0.02	0.03	0.02	0.02	0.09	0	0.03	0.07	0.11	0	0	0	0	0	0.02	0.05	0.02	0.05	0.06	0.03	0.03	0.01	0.11	0.03	0.1	0	0.02	0.07	0
XLOC_000678	0	0.07	0.29	0.63	0.43	0.22	0.87	0.32	0	0	0.04	0	0	0.02	0.1	0	0	0.05	0.04	0	0.07	0	0.03	0.09	0	0	0.08	0.08	0.11	0.11	0.24	0.13	0	0	0.07	0.29	0.13	0.04	0.08	0	0	0	0.31	0.13	0.35	0.13	0	0.35	0.08
XLOC_000679	0	0	0.01	0.01	0	0.03	0	0.01	0.43	0.55	0.41	0.31	0.38	0.45	0.57	0.43	0.68	0.71	0.33	0.46	0.21	0.48	0.45	0.51	0.72	0.92	0.26	0.45	0.41	0.38	0.22	0.18	0.46	0.53	0.33	0.57	0.5	0.67	0.61	0.61	0.49	0.37	0.08	0.08	0.11	0.14	0.2	0.09	0.61
XLOC_000680	0.05	0.11	0.09	0.2	0.16	0.05	0.2	0.11	0.42	0.61	0.76	0.83	0.83	0.69	0.84	0.73	0.08	0.19	0.19	0.25	0.16	0.29	0.56	0.24	0.08	0.26	0.2	0.23	0.17	0.09	0.36	0.28	0.16	0.22	0.28	0.47	0.37	0.13	0.45	0.32	0.16	0.07	0.11	0.21	0.13	0.17	0.17	0.22	0.1
XLOC_000681	0.66	0.51	0.61	0.53	0.42	0.51	0.24	0.42	0.24	0.26	0.49	0.26	0.12	0.11	0.13	0.11	0.2	0.16	0.23	0.21	0.16	0.04	0.02	0.13	0.27	0.08	0.21	0.26	0.19	0.18	0.12	0.08	0.01	0.12	0.28	0.32	0.19	0.13	0.14	0.18	0.29	0.1	0.34	0.19	0.14	0.2	0.33	0.16	0.04
XLOC_000682	0.2	0.21	0.26	0.14	0.35	0.14	0.22	0.16	0.01	0.14	0.49	0.14	0.13	0.08	0.13	0.15	0.15	0.03	0.24	0.17	0.14	0.02	0.13	0.14	0.13	0.2	0.04	0.1	0.35	0.05	0.12	0.29	0.07	0.09	0.17	0.12	0.19	0.14	0.23	0.2	0.15	0.24	0.3	0.27	0.23	0.36	0.3	0.19	0.22
XLOC_000683	0.02	0.04	0	0.05	0	0	0.06	0.03	0.18	0.1	0.12	0.09	0.23	0.16	0.07	0.16	0.15	0.06	0.05	0.14	0.07	0.08	0	0.15	0.14	0.03	0.19	0.08	0.13	0.16	0.09	0.02	0.12	0.05	0.03	0.11	0.06	0.03	0.04	0.04	0	0.12	0.01	0.06	0.02	0.03	0.02	0.04	0.07
XLOC_000684	0	0.08	0	0	0	0	0	0	0	0.38	0.08	0.18	0	0.04	0	0.22	0.18	0.14	0.16	0	0.03	0	0	0.07	0.11	0	0.09	0.38	0	0.48	0.02	0.05	0.28	0.11	0.18	0	0.1	0.04	0.4	0	0.21	0.27	0.09	0.1	0.21	0.12	0.05	0.26	0.26
XLOC_000685	0	0	0	0	0	0	0.13	0	0	0	0.21	0	0	0	0	0.12	0	0.1	0.14	0	0	0	0	0.12	0	0	0	0	0	0	0	0	0	0	0	0	0	0.07	0.08	0	0	0	0	0	0	0	0	0	0
XLOC_000686	0.64	0.3	0.67	0.41	0.91	0.57	0.56	0.37	0.24	0.25	0.26	0.16	0.19	0.15	0.2	0.32	0.11	0.16	0.26	0.17	0.54	0.2	0.24	0.38	0.32	0.12	0.32	0.34	0.78	0.37	0.37	0.78	0.26	0.13	0.5	0.42	0.27	0.43	0.43	0.35	0.66	0.43	0.74	0.7	1.08	1.1	0.92	1.01	0.22
XLOC_000687	1.37	1.2	1.09	1.53	1.82	1.07	0.93	1.31	2.1	2.38	4.91	2.04	2.01	2.64	2.18	1.92	3.27	3.4	5.48	4.65	4.9	4.99	3.84	4.63	3.9	3.08	3.66	4.39	3.46	3.09	1.46	3.02	3.66	3.65	4.49	2.02	1.36	2.65	2.53	2.46	3.26	3.36	4.38	3.35	3	2.54	2.89	3.37	3.82
XLOC_000688	0	0.19	0.05	0.39	0.41	0.42	0.19	1.54	0	0	0.04	0.04	0.15	0	0.08	0.28	0.7	0.2	0.71	0.61	1.71	0.76	0.39	0.48	0.08	0	0.59	0.8	0.04	0.17	0.15	0.39	0.1	0.1	0	0.27	0	0.22	0.08	0	0.27	0.11	0.51	0.04	0.74	0.08	0.85	0.9	0.39
XLOC_000689	0.11	0.03	0.07	0.02	0	0.02	0.08	0.06	1.07	0.32	0.7	0.94	0.74	0.8	1.12	0.97	0.98	0.18	0.69	1.46	1.36	1.58	2.35	1.83	1.34	0.34	0.52	1.13	1.28	1.14	2.18	2.31	0.61	0.24	0.45	0.87	0.92	1.03	1.24	1.54	0.96	0.15	0.73	1.09	1.24	0.79	1.27	1.65	1.03
XLOC_000690	3.68	3.62	4.08	3.71	3.81	3.19	3.58	4.01	4.66	4.97	5.25	4.81	4.56	3.94	4.37	5.23	4.06	4.65	4.49	5.02	4.58	3.73	4.68	4.36	3.93	3.64	5.47	5.11	4.56	3.86	3.92	4.55	3.97	4.48	5.86	4.1	4.31	3.92	4.53	4.69	3.53	4.55	4.17	4.03	3.84	3.56	3.9	4.11	3.84
XLOC_000691	0.56	0.58	0.1	0.33	0.28	0.28	0.22	0.26	0.79	0.83	1.24	0.86	1.32	1.29	1.19	1.1	1.84	2.28	1.22	1.07	0.91	0.92	0.67	0.89	1.58	1.43	0.7	0.75	0.49	0.65	0.61	0.45	0.79	0.79	1.17	0.84	1.4	0.9	1.42	0.84	0.65	0.77	0.6	0.32	0.22	0.34	0.28	0.24	1.41
XLOC_000692	0.1	0.07	0.29	0	0	0	0.03	0.06	0.26	0.18	0.05	0.2	0.07	0.15	0.09	0	0.05	0.1	0.21	0.1	0.21	0.12	0.11	0.09	0	0.17	0.19	0.47	0.27	0	0	0.29	0.05	0.18	0.06	0.07	0.12	0.24	0.04	0	0.22	0.15	0.11	0.12	0.14	0.16	0.16	0.14	0
XLOC_000693	0	0	0	0	0	0	0	0	0.26	0.18	0.48	0.25	0.21	0.11	0.15	0.21	0.03	0.05	0.12	0.14	0.03	0.05	0.03	0.04	0.08	0.05	0.02	0.07	0	0	0	0	0.02	0	0.1	0.09	0.11	0.05	0.07	0.1	0	0	0	0	0	0	0	0	0.03
XLOC_000694	0	0	0.07	0	0	0	0	0	0.06	0.16	0.08	0.03	0.29	0.03	0.08	0.09	0	0.04	0	0	0	0	0.12	0	0	0.05	0.14	0.05	0	0	0	0	0	0	0	0	0	0	0	0.22	0	0	0.06	0.05	0	0	0	0.07	0
XLOC_000695	0.06	0	0.02	0.04	0.03	0	0.1	0.07	0.02	0.32	0.07	0.13	0.06	0.19	0.03	0.02	0.04	0.06	0.06	0.19	0.1	0.14	0.02	0.1	0.02	0.06	0.02	0.1	0	0.15	0.06	0.03	0.02	0.04	0.05	0.05	0	0.49	0.13	0.09	0	0	0	0.13	0.08	0.03	0.11	0	0.06
XLOC_000696	0.14	0.3	0.23	0.32	0.37	1.12	0.5	0.95	0.24	0.32	0.2	0.1	0.15	0.48	0.18	0.44	0.33	0.36	0.49	0.18	0.52	0.81	0.25	0.4	0.14	0.38	0.63	0.27	0.38	0.98	0.37	0.54	0.19	0.42	0.4	0.23	0.55	0.88	0.33	1.12	0.37	0.21	0.25	0.32	0.5	0.46	0.14	0.9	0.37
XLOC_000697	0.04	0.3	0.04	0.14	0.25	0.14	0.24	0.06	0.01	0.35	0	0.07	0.21	0.15	0.26	0.06	0	0.02	0	0.01	0.1	0.09	0.05	0	0	0	0	0	0.19	0.17	0.19	0.01	0.17	0.31	0.09	0.33	0.58	0.8	0.62	0.6	0.02	0.03	0	0.03	0.13	0.12	0.12	0.03	0.01
XLOC_000698	0.11	0.11	0.03	0.02	0.4	0.18	0.17	0.36	0.17	0.3	0.32	0.41	0.2	0.12	0.49	0.26	0.09	0	0.02	0.07	0.14	0.06	0.14	0.08	0.1	0.02	0.29	0.15	0.2	0.27	0.39	0.56	0.46	0.35	1.25	0.86	1.17	1.01	0.84	1.61	0.05	0.1	0.24	0.53	0.38	0.38	0.28	0.58	0.05
XLOC_000699	0.1	0.06	0.09	0.05	0.03	0.07	0.14	0.52	0.06	0.12	0.3	0.12	0.11	0.09	0.57	0.46	0	0	0.11	0.07	0.02	0.04	0	0.19	0.08	0.08	0.17	0.19	0.01	0.25	0.36	0.26	0.53	0.39	0.44	0.41	0.55	0.97	0.7	1.37	0	0.1	0.13	0.11	0.38	0.09	0.33	0.25	0.02
XLOC_000700	0.11	0.13	0.23	0.32	0.5	0.16	0.15	0.17	0.14	0.28	0.11	0.27	0.19	0.21	0.12	0.22	0.29	0.13	0.08	0.13	0.36	0.33	0.21	0.32	0.12	0.13	0.08	0.35	0.2	0.26	0.4	0.26	0.33	0.38	0.4	0.24	0.14	0.28	0.31	0.36	0.1	0.1	0.11	0.3	0.14	0.56	0.27	0.22	0.12
XLOC_000701	0	0	0	0	0	0	0	0	0	0	0	0	0	0	0	0	0	0	0	0	0	0	0	0	0	0	0	0	0	0	0	0	0	0	0	0	0	0	0	0	0	0	0	0	0	0	0	0	0
XLOC_000702	1.44	1.42	1.19	1.32	1.42	1.63	1.14	1.32	0.6	0.85	0.83	0.79	1.02	1.13	0.99	0.82	0.7	0.93	0.87	0.54	0.45	0.99	0.77	1.09	1	0.92	0.92	0.45	0.73	0.98	0.71	1.26	2.38	1.53	1.46	2.06	0.97	1.59	1.21	1.6	1.21	1.45	0.95	0.98	0.84	1.43	1.26	0.74	0.76
XLOC_000703	0.31	0.18	0.22	0.17	0.14	0.26	0.3	0.25	0.06	0.1	0.05	0.15	0.13	0.2	0.26	0.03	0.09	0.15	0.12	0.05	0.09	0.03	0.07	0.14	0.12	0.03	0.28	0.23	0.04	0.31	0.03	0.25	0.19	0.03	0.15	0.3	0.14	0.68	0.22	0.08	0.38	0.13	0.09	0.31	0.14	0.11	0.19	0.37	0.11
XLOC_000704	0	0.13	0.07	0.25	0.19	0.14	0.03	0.28	0.22	0.05	0.07	0.07	0	0.04	0	0.04	0.15	0.04	0.1	0.03	0.06	0.08	0.05	0.13	0.11	0.03	0.18	0.2	0	0.04	0.07	0.33	0.09	0.14	0.12	0.28	0.22	0	0.22	0.04	0	0.15	0.09	0.09	0	0.11	0	0.06	0.11
XLOC_000705	2.31	2.55	2.28	2.1	2.22	2.4	2.32	2.61	1	0.89	1.46	1.16	1.65	1.51	1.63	1.63	0.68	1.06	0.92	0.59	0.74	0.89	1.25	0.66	0.98	1.06	1.51	0.75	0.65	0.94	0.8	1.22	1.33	1.01	1.39	1.18	1.61	2.16	0.82	1.05	1.25	1.42	1.3	1.23	1.65	1.77	0.73	1.78	0.71
XLOC_000706	0	0	0	0	0	0	0	0	0	0.27	0	0	0.04	0.18	0.07	0	0	0	0	0	0.06	0.08	0	0	0	0	0.22	0.03	0	0	0	0	0	0	0	0.13	0	0	0	0	0.25	0	0.04	0.13	0	0	0	0	0
XLOC_000707	0.14	0.07	0.03	0.03	0	0.04	0.13	0.07	0.21	0.11	0.14	0.09	0.31	0.4	0.21	0.11	0.06	0.03	0.14	0.14	0.04	0.15	0.06	0	0	0.07	0.15	0	0.2	0	0.13	0	0.03	0.09	0.11	0.02	0.14	0.25	0.12	0.21	0.01	0.17	0.05	0.03	0.05	0.01	0.07	0.03	0.05
XLOC_000708	0.59	0.2	0	0.29	0.22	0.25	0	0.2	0.22	0.04	0.11	0.35	0.44	0.25	0.28	0.34	0	0.16	0.07	0	0.27	0	0.06	0	0.21	0	0.21	0.42	0	0.13	0.2	0	0.16	0.16	0.07	0	0.06	0.15	0.43	0	0.36	0.08	0.12	0.11	0.09	0.22	0.35	0	0
XLOC_000709	0.19	0.26	0.24	0.25	0.34	0.18	0.28	0.26	0.38	0.39	0.44	0.4	0.82	0.78	0.7	0.89	0.26	0.36	0.18	0.31	0.45	0.29	0.4	0.33	0.33	0.22	0.48	0.2	0.24	0.28	0.25	0.28	0.57	0.54	0.67	0.68	0.42	0.94	0.81	0.64	0.3	0.16	0.35	0.29	0.18	0.12	0.26	0.25	0.23
XLOC_000710	0.13	0.29	0.17	0.13	0.49	0.16	0.22	0.33	0.28	0.32	0.2	0.23	0.51	0.63	0.67	0.62	0.05	0.22	0.19	0.07	0.25	0.12	0.44	0.29	0.03	0.2	0.23	0.12	0.2	0.16	0.3	0.21	0.2	0.33	0.16	0.27	0.38	0.34	0.58	0.28	0.16	0.24	0.07	0.22	0.19	0.05	0.27	0.3	0.09
XLOC_000711	0.06	0.09	0.07	0.02	0.09	0.02	0	0.05	0.16	0.19	0.1	0.24	0.33	0.22	0.2	0.28	0.07	0.1	0	0.08	0.26	0.09	0.09	0.05	0.01	0.02	0.12	0.09	0.05	0.12	0	0.13	0.15	0.06	0.04	0.06	0.03	0.28	0.02	0.17	0.02	0.06	0.09	0	0	0.08	0.07	0	0.09
XLOC_000712	0.15	0.04	0.01	0.1	0.14	0.12	0.16	0.2	0.33	0.23	0.22	0.34	0.27	0.21	0.37	0.27	0.18	0.24	0.23	0.24	0.31	0.11	0.28	0.3	0.29	0.23	0.1	0.3	0.19	0.13	0.12	0.05	0.23	0.14	0.26	0	0.54	0.18	0.68	0.5	0.22	0.05	0.09	0.32	0.05	0.06	0.3	0.21	0.23
XLOC_000713	1.1	0.2	0.4	0.95	0.44	0.35	1.15	0.98	1.5	1.66	0.89	0.88	0.95	0.77	1.06	1.13	1.08	0.43	0.56	1.03	2.32	2.01	2.04	0.95	2.48	0.83	1.81	1.36	1.72	2.04	1.35	1.6	2.65	1.52	2.86	2.6	1.56	3.58	2.39	2.89	0.97	0.8	0.25	2.03	1.78	1.72	3.17	1.46	1.25
XLOC_000714	0.16	0.32	0.05	0	0	0.02	0.02	0.14	0.18	0.33	0.7	0.77	1.45	1.17	0.35	0.36	0.28	0.22	0.63	0.26	0.22	0.16	0.32	0.57	0.21	0.34	0.66	0.22	0.39	0.16	0.06	0.18	0.15	0.23	0.75	0.31	0.29	0.3	0.16	0.1	0.41	0.34	0.59	0.25	0.75	0.54	0.2	0.85	0.2
XLOC_000715	0.05	0.08	0.09	0	0	0.04	0	0.02	0.19	0.16	0.18	0.48	1	0.65	0.19	0.4	0.13	0.22	0.31	0.13	0.23	0.24	0.13	0.22	0.07	0.2	0.09	0.01	0.05	0.35	0.04	0.15	0.05	0.08	0.12	0.09	0.14	0.04	0.06	0.07	0.14	0.26	0.38	0.12	0.2	0.11	0	0.36	0.07
XLOC_000716	0.13	0.13	0.05	0.09	0.03	0.06	0.11	0.15	0.29	0.34	0.36	0.45	0.46	0.46	0.19	0.43	0.3	0.22	0.31	0.3	0.25	0.28	0.29	0.16	0.26	0.13	0.32	0.21	0.28	0.2	0.23	0.23	0.3	0.32	0.34	0.31	0.28	0.29	0.34	0.18	0.19	0.22	0.39	0.3	0.28	0.26	0.2	0.38	0.2
XLOC_000717	0.09	0.02	0.05	0.02	0.06	0.13	0.07	0.15	0.19	0.24	0.19	0.18	0.12	0.09	0.12	0.18	0.39	0.2	0.03	0.29	0.1	0.18	0.1	0.06	0.24	0.33	0.15	0.32	0.13	0.33	0.16	0.17	0.35	0.23	0.42	0.34	0.48	0.22	0.59	0.66	0.12	0.17	0.46	0.44	0.15	0.39	0.25	0.36	0.31
XLOC_000718	0	0.1	0	0	0	0	0	0.07	0.07	0.1	0.04	0	0.17	0.04	0	0.04	0.06	0.08	0.08	0.04	0	0	0.09	0.1	0	0.25	0	0	0	0.3	0.04	0	0	0.03	0.07	0	0.1	0	0.13	0.17	0	0.08	0	0	0	0.09	0	0.08	0.09
XLOC_000719	0.07	0.15	0.16	0.06	0.07	0	0	0.1	0.04	0.06	0.13	0	0.08	0.02	0	0.11	0.06	0.05	0.07	0	0.1	0.09	0.03	0.09	0	0	0.04	0.08	0	0.02	0	0.02	0.05	0.19	0.41	0	0.06	0.46	0.04	0.04	0.06	0.04	0.12	0	0.04	0.13	0.25	0.02	0
XLOC_000720	0.1	0.18	0.25	0.17	0.48	0.11	0.14	0.39	0.27	0.59	0.47	0.22	0.2	0.25	0.16	0.28	0.27	0.19	0.3	0.24	0	0.24	0.45	0.19	0.48	0.11	0.26	0.24	0	0.04	0.38	0.23	0.21	0.22	0.39	0.26	0.51	0.38	0.54	0.72	0.16	0.26	0.48	0.32	0.29	0.27	0.47	0.18	0.42
XLOC_000721	0	0	0	0	0	0	0	0	0.03	0	0	0	0	0	0	0	0	0.14	0	0	0	0	0.08	0	0.05	0.05	0.05	0	0.03	0	0	0	0	0	0	0	0	0	0.28	0	0	0.32	0	0.1	0.03	0	0	0.33	0
XLOC_000722	0.16	0.14	0.21	0.18	0.15	0.15	0.21	0.21	0.84	0.95	0.99	1.35	1.86	1.93	2.97	2.29	0.57	0.95	0.3	0.53	0.5	0.37	0.52	0.57	0.48	0.63	0.43	0.5	0.44	0.44	0.42	0.35	0.41	0.49	0.44	0.71	0.73	0.45	0.9	0.63	0.21	0.36	0.2	0.23	0.26	0.22	0.4	0.26	0.3
XLOC_000723	0	0	0	0	0	0	0	0	0	0	0.08	0	0	0	0	0	0	0	0	0	0	0	0	0	0.43	0	0	0	0	0.09	0	0	0	0	0	0	0	0	0	0	0	0	0	0	0	0	0	0	0
XLOC_000724	4.17	4.79	4.72	4.52	5.88	3.03	5.53	5.63	4.34	4.11	4.49	3.86	5.41	2.67	5.5	5.97	6.99	4.79	6.5	6.63	8.81	6.84	7.1	8.66	4.38	5.68	7.7	7.95	6.34	5.46	4.44	4.68	3.88	4.42	3.86	3.38	5.09	2.87	5.59	4.38	4.33	4.73	5.71	3.54	7.37	5.43	5.88	7.21	4.99
XLOC_000725	0	0	0	0	0	0	0	0	0.03	0.02	0.11	0	0	0	0	0	0	0.03	0	0	0.2	0	0.07	0	0.25	0	0.07	0	0	0	0.19	0	0.73	0.23	0	0	0	0	0	0	0	0.14	0.02	0.07	0	0	0.06	0	0
XLOC_000726	0.05	0.03	0.04	0.04	0	0.04	0	0	0	0.05	0	0	0	0	0	0	0	0.07	0	0	0	0.03	0	0	0	0	0	0	0	0	0	0	0.15	0	0	0	0	0.16	0	0	0	0	0	0	0	0	0	0	0
XLOC_000727	0	0	0	0.03	0	0.03	0	0	0	0	0.07	0	0	0	0	0	0	0.13	0.07	0	0	0.04	0	0	0	0.12	0	0	0	0	0	0.18	0.18	0	0	0.14	0.03	0.04	0	0	0	0	0	0	0.08	0	0	0	0
XLOC_000728	0	0	0	0	0	0	0	0	0	0	0.12	0	0	0	0	0	0	0	0	0	0	0	0.18	0	0	0	0	0	0	0	0	0	0.17	0.52	0.22	4.16	0	0.08	0	0	0	0	0	0.08	0	0	0	0	0.17
XLOC_000729	0	0.01	0.01	0.01	0.04	0	0.02	0	0.24	0.2	0.08	0.22	0.22	0.08	0.11	0.15	0.1	0.1	0.04	0.09	0.19	0.15	0.05	0.07	0.1	0.03	0.14	0.09	0.08	0.14	0	0.03	0.12	0.08	0.13	0.07	0.14	0.04	0.07	0.11	0.01	0.06	0	0	0.02	0	0	0.07	0.08
XLOC_000730	0.11	0.02	0.04	0	0.11	0	0.2	0	0.02	0.18	0.03	0	0.15	0.02	0.05	0.03	0.15	0.06	0.17	0.27	0.48	0.27	0.13	0.02	0.47	0.09	0.09	0.12	0.31	0.02	0.18	0.12	0.06	0.19	0.03	0	0.1	0	0	0	0	0.06	0.12	0.13	0.28	0.03	0.04	0	0.25
XLOC_000731	0	0	0	0	0	0	0	0	0	0	0	0	0.04	0	0	0	0	0.19	0	0.07	0	0	0.05	0	0	0	0	0.53	0	0	0	0	0	0	0	0	0	0	0	0	0	0	0	0.03	0	0	0.14	0	0
XLOC_000732	0.04	0	0	0	0	0	0.12	0	0.38	0.45	0.13	0.5	0.3	0.22	0.69	0.37	0.4	0.21	0.09	0.33	0.19	0.05	0.41	0.04	0.19	0.54	0.19	0.29	0.11	0	0.28	0.03	0.09	0.41	0.04	0.17	0.18	0	0.4	0.1	0	0.14	0.1	0.24	0	0	0.09	0.09	0.48
XLOC_000733	9.62	7.26	11.38	7.79	8.76	7.91	7.37	8.64	11.48	10.64	10.36	9.82	9.03	9.8	9.27	8.79	7.72	7.69	7.03	7.28	7.15	6.93	8.74	8.22	9.21	8.76	7.9	7.14	7.77	9.01	7.62	8.29	9.33	9.5	11.09	9.65	9.19	9.93	9.69	9.85	6.13	7.71	7.04	5.93	8.08	7.89	9.01	6.17	6.62
XLOC_000734	0	0	0	0	0	0	0	0	0	0	0.23	0	0.1	0.07	0	0.02	0.29	0.22	0.13	0.18	0.11	0.27	0.18	0.3	0.07	0.31	0.09	0.43	0.1	0	0.07	0.29	0.5	0.12	0	0	0.19	0.13	0	0.14	0.1	0.05	0.16	0.08	0	0.04	0.11	0.15	0.21
XLOC_000735	5.73	7.28	7.27	6.76	7.39	5.69	7.32	8.04	4.29	5.43	6.65	5.03	3.6	3.1	4.13	3.88	3.97	5.34	5.68	5.26	3.98	4.37	5.88	4.18	3.59	4.67	6.03	4.91	5.29	3.64	4.37	5.15	3.57	4.73	3.72	3.64	3.14	3.11	4.9	3.19	3.74	4.19	5.26	4.8	5.04	3.64	4.7	4.51	3.7
XLOC_000736	0	0	0.11	0	0	0	0	0	0	0	0.26	0	0.05	0	0.08	0.03	0.08	0.9	0.15	0.59	0.41	0.37	0.36	0.69	0	0.44	1.13	0.34	0.78	0.42	0.16	0.43	0.25	0.82	0.33	0.05	0	0.1	0	0.11	0.64	1.1	0.51	0.68	0.59	0.64	0.89	0.71	0.11
XLOC_000737	0.11	0.14	0.08	0.11	0	0.06	0	0.06	0.02	0	0.02	0.02	0.31	0.14	0.04	0.12	0.08	0.13	0	0.07	0.19	0.13	0.08	0.06	0.06	0	0.12	0.13	0.04	0.08	0	0	0.03	0.18	0.07	0.07	0	0	0	0	0.06	0.21	0.04	0	0.21	0.06	0	0	0.16
XLOC_000738	0.23	0.2	0.22	0.12	0	0.39	0	0.2	0.35	0.08	0.16	0	0.08	0	0.17	0	0.12	0.11	0.08	0	0	0	0.06	0.13	0.04	0	0.13	0	0	0.05	0	0.05	0	0.45	0.28	0	0	0	0	0	0.04	0.08	0	0.69	0	0	0	0.26	0.09
XLOC_000739	0.66	0.67	0.51	0.6	0.42	0.37	0.26	0.96	1.13	0.97	0.69	1.22	1.15	0.8	1.72	0.96	0.91	0.64	0.81	1.1	0.94	1.15	0.71	1.21	1.16	0.67	1.4	1.64	0.76	1.13	1.21	1.24	0.79	0.42	1.46	1.38	0.73	0.83	0.87	1.01	0.7	0.52	0.37	0.88	1.01	0.4	1.19	0.99	0.37
XLOC_000740	0	0.22	0.17	0	0	0	0	0	0.09	0.46	0.62	0.04	0.09	0	0	0	0	0.23	0.08	0	0.07	0.19	0	0	0	0	0	0	0.1	0.14	0	0	0	0.12	0.37	0	0	0.08	0	0	0.26	0	0	0.28	0	0	0	0	0
XLOC_000741	0.59	0.48	0.25	0.27	0.13	0.14	0.2	0.29	1.19	0.95	0.8	0.79	1.18	1.53	1.6	1.53	0.32	0.49	0.2	0.22	0.33	0.38	0.51	0.55	0.36	0.34	0.34	0.18	0.29	0.21	0.35	0.39	0.69	0.76	0.45	1.08	1.01	1.13	1.24	0.65	0.37	0.29	0.33	0.35	0.22	0.24	0.65	0.32	0.24
XLOC_000742	19.64	23.82	17	19.96	13.71	7.29	11.59	11.3	62.06	62.99	52.8	77.8	95.87	95.42	71.36	75.45	32.8	47.36	28.31	27.85	30	26.79	27.44	31.93	35.47	41.73	35.96	34.46	34.43	28.6	29.58	28.66	32.96	40.56	37.33	36.92	44.96	35.28	58.47	35.17	36.2	41.62	29.03	25.27	29.08	24.78	24.87	24.23	31.63
XLOC_000743	0.64	1.5	1.44	1.85	1.46	0.04	0.47	1.13	2.07	1.99	1.15	1.42	1.35	2.5	2.07	1.08	0.43	0.79	0.26	0.5	0.27	0.21	0.54	0.58	0.76	1.21	1.1	0.51	0.72	0.66	0.41	0.44	1.23	1.61	0.56	1.54	1.24	0.62	1.43	1.01	0	0.44	0.02	0.09	0.08	0	0	0.37	0.24
XLOC_000744	0.39	0.35	0.3	0.59	0.71	0.13	0.22	0.88	0.42	0.6	0.33	0.35	0.37	0.31	0.33	0.49	0.09	0.21	0.18	0.38	0.14	0	0.14	0.13	0	0	0.14	0.22	0	0.2	0.16	0.06	0.13	0.22	0.08	0.32	0.41	0.28	0.56	0.31	0	0	0.02	0	0	0	0	0	0.2
XLOC_000745	0.1	0.33	0.35	0.19	0	0.13	0.22	0.04	0.45	0.31	0	0.1	0.24	0.08	0.38	0.06	0	0.07	0	0	0.09	0	0.08	0	0	0	0.08	0	0	0	0	0.18	0.04	0	0.14	0.38	0.37	0	0.28	0.11	0	0	0	0	0	0	0	0	0
XLOC_000746	0.02	0	0.03	0	0	0	0	0.06	0	0	0.01	0.01	0	0	0	0.06	0.1	0.1	0.13	0.37	0.26	0.11	0.09	0.17	0.04	0.1	0.08	0.34	0.02	0.13	0.11	0.04	0.18	0	0.03	0	0	0.04	0.02	0	0.24	0.26	0.62	0.55	0.38	0.68	0.27	0.44	0.08
XLOC_000747	13.07	12.05	13.95	11.67	11.99	11.09	11.39	12.36	20.1	19.57	21.19	18.49	18.59	19.5	14.97	16.68	14.1	14.85	10.84	11.48	10.41	9.93	10.72	10.41	14.09	10.66	14.64	13	11.83	9.3	8.89	13.96	11.99	9.42	10.28	10.07	9.93	8.42	11.81	8.39	11.19	14.38	15.21	14.72	12.93	12.51	11.65	14.63	11.39
XLOC_000748	0	0	0	0	0.07	0	0	0	0.17	0.43	0.12	0.31	0	0.13	0.29	0.04	0.11	0	0.08	0.22	0.27	0.09	0	0.32	0	0	0.37	0	0	0	0.72	0	0	0	0.07	0	0	1.3	0	0.08	0.04	0	0	0	0.4	0.09	0.25	0	0
XLOC_000749	0	0.04	0.04	0	0.03	0	0	0	0.39	0.34	0	0.23	0.09	0.2	0.23	0.19	0	0.23	0	0.09	0.03	0.21	0.42	0.27	0.07	0.05	0	0.12	0	0.09	0.06	0	0	0.06	0	0.11	0.05	0.24	0.2	0	0	0.02	0	0.32	0.05	0.14	0.04	0.1	0
XLOC_000750	0.1	0.19	0.07	0.16	0.03	0.07	0.05	0.34	0.44	0.14	0.07	0.25	0.49	0.85	0.37	0.36	0.18	0.29	0.21	0.23	0.26	0.25	0.29	0.2	0.14	0.24	0.23	0.17	0.18	0.12	0.08	0.06	0.19	0.31	0.22	0	0.33	0.16	0.51	0.12	0.44	0.32	0.23	0.38	0.78	0.26	0.16	0.44	0.23
XLOC_000751	0	0	0	0	0	0	0.03	0	0	0	0	0	0.03	0	0.04	0	0.1	0.09	0.23	0.12	0.12	0.08	0.08	0.08	0.18	0.37	0	0	0.06	0.11	0.07	0	0.09	0.05	0.09	0	0	0	0	0	0.4	0.05	0	0	0	0	0	0	0.07
XLOC_000752	0.06	0.19	0.1	0.09	0	0.05	0.11	0.15	0.07	0	0	0.12	0.09	0.16	0.16	0	0.15	0.14	0	0.03	0.16	0.07	0.09	0.05	0.03	0.13	0.06	0.16	0.02	0.02	0.12	0	0.23	0.21	0.19	0.2	0.1	0.15	0.26	0.16	0.05	0	0	0.04	0	0.19	0.21	0	0
XLOC_000753	0	0	0	0	0	0	0	0	0	0	0	0.06	0	0	0	0	0.21	0	0.22	0.05	0.14	0	0.38	0.27	0.15	0.12	0.15	0	0.1	0	0.09	0.43	0	0.16	0	0	0	0	0	0	0.47	0	0.24	0.03	0.63	0.03	0.54	0.29	0.18
XLOC_000754	0	0	0	0	0.04	0	0	0.04	0.04	0.09	0	0.13	0.17	0.06	0.03	0.06	0.79	0.97	0.68	0.33	0.19	0.25	0.35	0.16	0.3	0.39	0.19	0.32	0.13	0.11	0.08	0.3	0	0.09	0.14	0	0.04	0.19	0	0	0	0	0	0.02	0.07	0	0	0.1	0.05
XLOC_000755	8.16	7.05	9.28	7.91	9.96	9.8	7.76	8.63	3.2	3.21	3.18	3.36	2.47	2.86	2.06	2.34	3.78	4.56	4.45	4.56	4.03	4.4	3.67	4.12	4.09	4.36	4.5	4.5	4.89	5.75	5.91	5.39	3.7	3.75	3.08	2.71	2.27	2.24	2.75	1.97	7.03	7.26	9.06	8.66	6.35	8.73	6.09	8.88	4.28
XLOC_000756	0.08	0.05	0	0	0.23	0	0	0.14	0	0.12	0	0	0.04	0.13	0.08	0.13	0	0.05	0	0	0	0	0.18	0.39	0.04	0.08	0.04	0	0	0	0.53	0.14	0.11	0.11	0	0	0	0.08	0	0	0.08	0	0	0	0.14	0	0.26	0.05	0.09
XLOC_000757	0.11	0.24	0.13	0.08	0.07	0	0.23	0.09	0.02	0.09	0.07	0.22	0.13	0.22	0.1	0.16	0.03	0.05	0.04	0.07	0.1	0.34	0.28	0	0.08	0.19	0.04	0.05	0.07	0.23	0.02	0.24	0.03	0.29	0.07	0.07	0	0.04	0	0	0.02	0.04	0.02	0.16	0	0	0.02	0.31	0
XLOC_000758	0	0	0	0	0	0	0	0	0	0	0	0	0	0	0	0	0	0	0	0	0	0	0	0	0	0	0	0	0	0	0	0	0	0	0	0	0	0	0	0	0	0	0	0	0	0	0	0	0
XLOC_000759	1.02	0.94	1.31	0.78	0.98	0.65	0.61	1.05	5.87	4.78	7.26	6.7	6.99	6.47	4.96	5.63	7.77	8.04	7.03	6.23	5.57	5.13	5.55	5.26	8.08	5.81	6.24	5.38	4.69	4.04	3.89	4.58	6.1	5.56	3.99	3.02	2.85	2.76	3.64	2.51	7.46	8.47	8.63	6.91	6.69	6.2	5.47	6.14	6.69
XLOC_000760	2.33	1.52	2.45	2.57	2.29	1.9	2.22	2.7	1.46	0.98	1.51	1.7	1.89	1.9	1.4	1.48	1.21	1.05	1.14	1.28	1.04	1.42	1.07	1.23	1.21	0.94	2.56	1.6	1.43	1.5	1.02	1.78	1.29	1.1	0.88	0.92	0.39	0.86	0.85	0.77	1.45	1.36	2.17	2.22	1.38	1.58	1.76	2.31	1.24
XLOC_000761	0	0	0.03	0.02	0.12	0.01	0	0.02	0.11	0.25	0.06	0.23	0.19	0.24	0.12	0.16	0.1	0.06	0.06	0.04	0.05	0.04	0.11	0.04	0.01	0.16	0.04	0.07	0	0.07	0	0.01	0.01	0.03	0.13	0.08	0.19	0.25	0.1	0.06	0.01	0.23	0.08	0.03	0.17	0.08	0.14	0	0.01
XLOC_000762	0.26	0.44	1.12	0.33	0.32	0.28	0.04	0.33	1.28	1.53	0.89	0.5	0.52	0.42	0.62	0.27	0.84	0.41	1.77	0.28	0.42	0.74	0.19	0.32	1.08	2.12	2.86	1.66	0.74	1.07	0.64	0.47	0.52	1.93	2.6	0.66	0.98	0.61	0.46	0.15	0.05	0.12	0.6	0.08	0	0.04	0.33	0.09	0.86
XLOC_000763	0.21	0.23	0.33	0.35	0.33	0.11	0.04	0.28	0.71	0.68	0.53	0.57	0.15	0.2	0.11	0.09	0.26	0.16	0.83	0.13	0.33	0.24	0.17	0.18	0.36	0.51	1.23	0.77	0.07	0.3	0.18	0.19	0.28	0.72	1.19	0.21	0.34	0.66	0.07	0.14	0.04	0	0.45	0.02	0	0.16	0.06	0.06	0.31
XLOC_000764	0	0	0	0	0	0	0	0	0.03	0	0	0	0	0	0	0	0.04	0.12	0	0	0	0	0	0	0.13	0.22	0	0	0	0.03	0	0	0	0	0	0	0	0	0	0	0.03	0.03	0	0	0	0	0	0	0.13
XLOC_000765	0	0	0.03	0.06	0	0	2	0.04	0	0.01	0.01	0.01	0.08	0	1.33	0	0.04	0.03	0	0	0	0	1.31	0	0.11	0	0.03	0	0	0.06	1.27	0	0	0.02	0.04	0	0	0.02	2	0.08	0.03	0.03	0.05	0.02	0	0.03	2.65	0.06	0
XLOC_000766	0.02	0.07	0	0	0	0	0.44	0	0.01	0	0	0.01	0.04	0.04	0.35	0.01	0.02	0	0	0	0.06	0	0.43	0	0.01	0.02	0.02	0.08	0	0	0.84	0.04	0	0	0.18	0.04	0	0.02	0.38	0.02	0.01	0.01	0	0	0	0	0.58	0.01	0
XLOC_000767	0	0	0	0	0	0	0	0	0	0	0	0	0	0	0	0	0	0	0	0	0	0	0	0	0	0	0	0	0	0	0	0	0	0	0	0	0	0	0	0	0	0	0	0	0	0	0	0	0
XLOC_000768	2.76	2.78	2.51	2.84	2.55	2.96	2.65	3.02	1.42	1.88	1.46	1.42	1.08	1.03	1.33	1.35	1.69	1.8	1.97	1.74	2.05	1.81	2.45	2.1	1.55	2.07	1.65	1.53	2.17	2.15	2	2.01	1.53	1.86	1.18	1.4	1.75	1.5	1.36	2.32	1.64	1.99	2.06	1.77	1.85	2.2	2.34	2.03	1.09
XLOC_000769	0.45	0.28	0.19	0.39	0.48	0.36	0.37	0.48	0.53	0.34	0.36	0.38	0.35	0.14	0.21	0.18	0.78	0.41	0.4	0.45	0.64	0.18	0.6	0.35	0.98	0.7	0.23	0.3	0.54	0.51	0.6	0.23	0.41	0.64	0.44	0.2	0.79	0.24	0.48	0.38	0.56	0.34	0.28	0.12	0.33	0.35	0.42	0.34	0.67
XLOC_000770	5.19	5.45	4.19	5.71	4.72	5.95	4.95	4.04	3.51	3.92	4.12	4.34	3.69	4.29	3.19	2.69	2.37	2.06	4.16	3.29	3.41	4.27	3.01	2.66	1.7	1.97	4.23	3.6	3.25	3.14	2.68	2.46	2.75	2.86	4.27	3.05	2.97	3.46	4.2	4.68	2.15	3.22	4.6	4.96	3.92	3.7	3.88	4.17	2.68
XLOC_000771	0.83	0.65	0.67	0.53	0.95	0.66	0.7	0.84	1.22	1.11	1.17	1.4	1.29	1.71	1.48	1.16	1.04	1.2	1.62	0.83	0.79	1.09	0.65	0.98	1.82	2.14	0.89	0.95	0.69	1.23	0.59	0.9	2.8	2.88	0.9	1.85	0.97	1.7	1.2	0.82	1.72	1.73	1.17	1.23	0.78	1.58	1.39	1.17	1.77
XLOC_000772	0.7	1.06	1.14	0.67	0.3	0.68	0.97	0.46	1.06	0.68	0.81	1.1	0.96	1.15	1.08	1	1.3	1.13	1.04	0.58	0.67	0.88	0.49	0.51	1.32	0.73	1.48	1.02	0.31	1.18	1.18	0.61	0.57	0.95	1.16	1.15	0.89	1.39	1.07	1.05	0.5	0.72	0.79	0.83	0.5	1.29	0.62	0.96	0.91
XLOC_000773	0	0	0	0	0	0	0	0	0	0	0	0	0	0	0	0	0	0	0	0	0	0	0	0	0	0	0	0	0	0	0	0	0	0	0	0	0	0	0	0	0	0	0	0	0	0	0	0	0
XLOC_000774	0	0	0	0	0	0	0	0	0	0	0	0	0	0	0	0	0	0	0	0	0	0	0	0	0	0	0	0	0	0	0	0	0	0	0	0	0	0	0	0	0	0	0	0	0	0	0	0	0
XLOC_000775	0	0	0	0.04	0	0.04	0	0.22	0.03	0	0.08	0.05	0	0.11	0.11	0.2	0	0.03	0	0.19	0.13	0.3	0.12	0.13	0.16	0	0.17	0.25	0.15	0	0.11	0.03	0	0	0	0	0.04	0	0	0.06	0.08	0	0.03	0.17	0	0	0.2	0.1	0.22
XLOC_000776	0.05	0	0.02	0.12	0.09	0.1	0.05	0.04	0.04	0.01	0.05	0.23	0.06	0.04	0.09	0.1	0.27	0.05	0.12	0.39	0.28	0.19	0.14	0.23	0.18	0.01	0.12	0.48	0.1	0.1	0.21	0.14	0.1	0.01	0	0.14	0.04	0.02	0.02	0.03	0.22	0.05	0.06	0.61	0.37	0.12	0.27	0.21	0.43
XLOC_000777	1.65	1.33	1.51	1.04	1.13	1.2	1.31	1.14	0.97	0.74	0.93	0.79	1.38	1.21	1.08	1.34	0.57	1.02	0.44	0.45	0.39	0.26	0.55	0.58	0.78	0.82	0.64	0.51	0.55	0.57	0.5	0.85	0.77	1.03	0.59	0.82	0.53	0.78	0.79	0.68	0.77	0.92	0.87	0.64	0.53	0.6	0.47	0.61	0.88
XLOC_000778	1.02	0.92	0.86	0.81	0.63	0.6	0.7	0.93	0.47	0.44	0.41	0.43	0.84	0.72	0.61	0.72	0.37	0.57	0.21	0.34	0.34	0.27	0.28	0.34	0.39	0.57	0.37	0.42	0.26	0.36	0.18	0.3	0.51	0.5	0.29	0.27	0.39	0.4	0.51	0.34	0.58	0.68	0.56	0.45	0.53	0.64	0.38	0.56	0.47
XLOC_000779	0.45	0.29	0.34	0.23	0.31	0.27	0.33	0.4	1.51	0.64	1.08	0.57	1	0.51	0.66	0.42	1.01	0.66	0.62	0.75	1.68	0.85	0.77	0.39	1.42	0.71	0.5	1.19	1.79	0.92	1.09	1.29	1.31	0.55	1.01	0.66	1.01	0.44	1.02	0.69	1.28	0.85	1.53	0.9	1.57	0.95	2.75	1.59	0.97
XLOC_000780	0	0	0	0	0	0	0	0	0	0	0	0	0	0	0	0.04	0.53	0.38	0.08	0.3	0.07	0	0	0.19	0.04	0	0	0	0	0.09	0	0.09	0.11	0	0	0	0.07	0.16	0	0	0.08	0.12	0	0	0	0.09	0.36	0	0.34
XLOC_000781	0.56	0.69	1.71	4.01	1.11	1.44	2.52	3.09	0.2	0.32	0.67	1.04	0.25	0.94	1.24	0.98	0.32	0.05	0.27	0.46	0.06	0.41	1.02	0.56	0.31	0.07	0.19	0.47	0.03	0.25	1.3	0.34	0.18	0.14	0.26	0.98	0.56	0.54	1.12	0.85	0.08	0.12	0.25	0.77	0.21	0.53	1.42	0.43	0.1
XLOC_000782	0.13	0.19	0.33	0.92	0.38	0.94	0.67	0.77	0.13	0.02	0.16	0.4	0.12	0.23	0.44	0.3	0	0.01	0.16	0.28	0.09	0.38	0.5	0.23	0.01	0.02	0.15	0.33	0.04	0.15	0.41	0.38	0.19	0.06	0.12	0.15	0.2	0.22	0.76	0.45	0.06	0.02	0.1	0.33	0.03	0.16	0.26	0.3	0.02
XLOC_000783	0	0.16	0.04	0.14	0	0	0.03	0.08	0.04	0.22	0.45	0.18	0.2	0.02	0.16	0.04	0.01	0	0.04	0.1	0.03	0.07	0.04	0	0.02	0.15	0.23	0.05	0.18	0	0.13	0	0	0.15	0.25	0.23	0.19	0	0.17	0.18	0	0.02	0.15	0	0	0	0.01	0.02	0.02
XLOC_000784	0.2	0.1	0.25	0.27	0.58	0	0.09	0.3	0.75	0.72	0.97	1.22	0.93	0.86	1.03	0.6	0.19	0.18	0.94	0.48	0.62	0	0.27	0.21	0.17	0	0.14	0.46	0.06	0.35	0.26	0.03	0.07	0.11	1.15	0.63	0.76	0.66	0.28	0.22	0.16	0.19	0.33	0.35	0.67	0.09	0	0.13	0.22
XLOC_000785	0.22	0.81	0.79	0.9	0.68	0.64	0.73	0.49	0.59	0.5	0.85	0.7	0.43	0.43	0.48	0.62	0.43	0.37	0.33	0.76	0.44	0.2	0.65	0.35	0.38	0.33	0.59	0.93	0.33	0.18	0.27	0.4	0.22	0.73	0.48	0.55	0.5	0.42	0.55	0.59	0.23	0.25	0.35	0.57	1.01	0.16	0.35	0.3	0.57
XLOC_000786	0	0	0	0	0	0	0	0	0	0	0	0	0	0	0	0	0	0	0	0	0	0	0	0	0	0	0	0	0	0	0	0	0	0	0	0	0	0	0	0	0	0	0	0	0	0	0	0	0
XLOC_000787	0.23	0.39	0.28	0.33	0.15	0.33	0.42	0.27	0.14	0.14	0.12	0.43	0.02	0.13	0.19	0.18	0.03	0.11	0.31	0.11	0.1	0.14	0.09	0.13	0.02	0.06	0.26	0.06	0.19	0.14	0.06	0	0.03	0.14	0.07	0.15	0.07	0	0.04	0	0.38	0.13	0.17	0.27	0.07	0.05	0.63	0.5	0.43
XLOC_000788	0.03	0.11	0.24	0.05	0.16	0.14	0.06	0	0.18	0.02	0.28	0.05	0.16	0.08	0.06	0.16	0.13	0.19	0.07	0.16	0.21	0.37	0.19	0.34	0.08	0.17	0.32	0.09	0.02	0.54	0.49	0.04	0.12	0.62	0.09	0.13	0.03	0.14	0.16	0.08	0.22	0.11	0.21	0.29	0.32	0.04	0.05	0.09	0.3
XLOC_000789	1.14	1.38	1.55	2.68	1.4	2.33	1.75	1.38	1.18	0.96	1.21	1.76	1.95	3.13	1.11	1.82	0.64	0.69	0.32	0.34	0.69	0.72	0.52	0.53	0.5	0.7	1.13	0.63	1.19	0.64	0.41	0.47	1.48	1.67	0.36	1.69	0.42	1.04	1.33	0.66	0.94	0.91	1.32	1.38	1.15	0.5	0.92	1.34	0.66
XLOC_000790	0.24	0.27	0.49	0.41	0.46	0.6	0.37	0.47	0.2	0.03	0.2	0.35	0.31	0.44	0.22	0.2	0.06	0.07	0.13	0.08	0.01	0.03	0.02	0.09	0	0.01	0.13	0.09	0.07	0.19	0.04	0.07	0	0.07	0.07	0.09	0.09	0.36	0.06	0.16	0.09	0.04	0.15	0.15	0.33	0.19	0.11	0.06	0.18
XLOC_000791	0.06	0.16	0.69	0.42	0	0.51	0	0.16	0.14	0.47	0.34	0.35	0.13	0.34	0.46	0.45	0.09	0.13	0	0.17	0.05	0.14	0.09	0.05	0	0	0.17	0.31	0	0	0.19	0.07	0.13	0.09	0.22	0.64	0	0.12	0.14	0	0.03	0.33	0	0.36	0	0.18	0.16	0.36	0
XLOC_000792	0.06	0.04	0.02	0	0.06	0.08	0.05	0.05	0.09	0.3	0.14	0.21	0.34	0.37	0.02	0.1	0	0.02	0	0	0	0	0	0.03	0	0	0	0	0	0	0	0	0.35	0.18	0.28	0.12	0.18	0.06	0	0	0	0	0	0	0.04	0	0	0	0
XLOC_000793	0	0	0	0	0	0	0	0	0	0	0.11	0	0.04	0.08	0	0	0	0.24	0.07	0.07	0	0.08	0	0	0	0	0	0.11	0.04	0	0	0	0	0	0	0	0	0.77	0	0	0	0	0	0.1	0	0	0	0	0
XLOC_000794	0	0	0	0	0	0	0.09	0	0.11	0.05	0.05	0	0	0	0	0.06	0	0	0	0.09	0.31	0.59	0	0	0	0	0.14	0	0	0	0	0.18	0	0	0	0	0.04	0.1	0	0	0	0.11	0	0	0.06	0	0	0	0
XLOC_000795	0.17	0.07	0.34	0.63	0.43	0.06	0.52	0.32	1.33	1.07	2.34	1.43	0.69	1.02	0.72	1.26	1.8	1.12	2.46	2.37	1.18	1.46	2.57	2.28	1.48	1.08	1.48	1.94	0.98	0.58	2.02	1.56	1.4	0.59	2.53	1.31	0.95	1.48	1.35	1.32	0.72	1.35	1.8	1.67	0.79	0.62	1.41	1.86	1.02
XLOC_000796	0.08	0.09	0.13	0.12	0.15	0.27	0.19	0.16	0.09	0.05	0.5	0.3	0.06	0.27	0.1	0.17	0.26	0.09	0.42	0.56	0.47	0.38	0.21	0.18	0.22	0.27	0.37	0.26	0.41	0.45	0.32	0.18	0.32	0.08	0.1	0.08	0.25	0.22	0.12	0.15	0.04	0.06	0.45	0.26	0.06	0.22	0.04	0.02	0.3
XLOC_000797	3.82	2.12	7.8	4.22	6.78	4.62	4.79	4.65	0.11	0.15	0.19	0.19	0.25	0.26	0.17	0.36	0.02	0.04	0.03	0.01	0.03	0.01	0.03	0.01	0.02	0.05	0.01	0.02	0.02	0.01	0.03	0.04	0.01	0.06	0.01	0.09	0.05	0.04	0.08	0.06	0.01	0.02	0.03	0.03	0.02	0.02	0.02	0.03	0.02
XLOC_000798	0.02	0.15	0.16	0.59	0.35	0.27	0.23	0.36	0.19	0.34	0.14	0.16	0.27	0.38	0.15	0.39	0.22	0.26	0.12	0.15	0.16	0.27	0.19	0.38	0.12	0.19	0.14	0.27	0.19	0.21	0.23	0.34	0.18	0.18	0.18	0.22	0.09	0.17	0.15	0.3	0.1	0.23	0.14	0.49	0.09	0.32	0.13	0.29	0.17
XLOC_000799	0.59	0.51	0.72	0.69	0.63	0.66	1.18	1.19	0.75	0.8	0.85	0.53	1.86	0.5	1.65	1.22	0.95	1.75	1.18	0.8	1.06	0.36	1.12	1.4	1.61	2.47	1.15	0.61	0.51	1.26	0.56	1.08	2.12	2.38	1.04	0.51	0.45	0.36	1.15	0.53	1.42	2.4	1.87	0.41	0.87	0.56	1.35	0.91	0.53
XLOC_000800	0.04	0.05	0.01	0.02	0.01	0	0.01	0.07	3.26	3.38	3.6	2.86	3.59	3.55	3.81	4.14	9.16	9.46	8.96	7.07	7.49	6.6	7.8	7.22	5.95	5.37	7.01	7.21	5.66	5.13	4.92	5.98	4.09	3.75	3.41	2.46	2.1	2.14	3.11	1.65	5.72	5.85	5.62	4.96	4.75	4.12	4.52	4.92	7.78
XLOC_000801	0	0.04	0.02	0	0.03	0	0	0.01	1.43	0.9	1.12	1.03	1.01	0.99	1.35	1.15	3.64	3.54	3.21	3.4	1.89	2.69	2.98	2.85	4.35	2.83	2.5	3.01	2.2	2.36	2.3	2.98	2.43	3.04	2.2	2.42	1.88	1.93	1.95	1.37	3.49	2.46	2.27	2	1.99	1.92	2.47	2.15	3.69
XLOC_000802	0	0	0	0	0	0	0	0	0	0	0	0	0	0	0	0	0	0	0	0	0	0	0	0	0	0	0	0	0	0	0	0	0	0	0	0	0	0	0	0	0	0	0	0	0	0	0	0	0
XLOC_000803	0	0	0	0	0	0	0	0	0.04	0	0	0	0	0	0	0	0	0	0	0.07	0	0	0	0	0	0	0	0	0.55	0	0	0	0	0	0	0	0	0	0.09	0	0.12	0	0.04	0	0	0	0	0	0.17
XLOC_000804	1.32	1.69	2.65	2.02	2.87	2.3	2.14	2.25	0.8	0.99	1.41	1.33	2.29	2.24	1.43	1.48	0.87	1.83	1.3	1.2	1.89	1.39	1.23	1.11	0.79	1.42	1.53	1.01	1.36	1.41	0.6	0.92	0.74	1	0.97	0.84	0.85	0.99	1.01	0.81	1.1	1.31	1.76	1.31	1.27	1.28	1.75	1.42	0.94
XLOC_000805	1.21	1.74	2.31	1.85	1.53	1.75	1.66	1.69	0.87	0.81	1.09	0.84	1.37	1.75	1.02	1.19	0.43	1.57	0.9	0.64	0.83	0.65	0.68	0.76	0.76	0.94	1.14	0.72	0.94	0.9	0.32	0.58	0.59	0.77	0.53	0.49	0.38	0.45	0.66	0.34	0.5	0.92	0.8	0.66	1.14	0.64	0.84	0.73	0.78
XLOC_000806	0.55	1.19	1.39	0.91	1.55	1.3	1.06	1.3	0.4	0.41	0.73	0.34	0.96	0.86	0.73	0.68	0.48	0.68	0.61	0.56	0.79	0.7	0.79	0.43	0.39	0.42	0.48	0.45	0.46	0.64	0.49	0.26	0.39	0.6	0.48	0.46	0.46	0.53	0.41	0.14	0.57	0.68	0.98	0.82	0.98	0.6	0.81	0.39	0.3
XLOC_000807	13.41	10.24	11.08	11.61	7.83	8.86	9.9	7.8	1.21	0.88	2.21	2.23	2.43	2.38	2.79	1.78	1.85	3	1.99	2.41	1.58	2.04	1.53	1.77	3.13	3.3	4.3	2.72	1.55	2.36	0.87	1.66	4.86	5.04	1.9	3.05	0.86	1.52	1.83	0.97	5.09	3.96	4.66	4.93	2.74	3.72	3.11	2.41	2.96
XLOC_000808	11.3	10.08	10.56	10.88	6.67	9.88	8.17	7.43	1.15	0.88	1.8	1.79	2.38	2.54	2.44	1.8	1.53	3.05	1.54	2.53	1.45	2	1.31	1.53	2.11	3.57	3.66	2.39	1.4	3.04	1.02	1.32	4.27	4.67	1.32	2.89	0.8	1.77	1.91	0.82	3.44	3.54	4.27	3.98	2.97	3.53	2.56	2.2	2.78
XLOC_000809	4.41	4.76	2.23	2.22	2.67	3	2.67	3.32	1.1	0.54	0.44	0.64	1.01	0.85	1.09	0.38	0.43	0.47	0.76	0.55	1.1	0.68	0.3	0.72	1	0.51	0.68	0.44	0	0.73	0.15	0.23	3.6	3.33	1.32	2.75	0.4	1.16	0.98	0.11	2.64	2.41	2.42	2.03	1.89	2.71	1.91	1.27	0.85
XLOC_000810	0.19	0.17	0.33	0.1	0.1	0.38	0.21	0.15	0	0.02	0.02	0.05	0.08	0	0.06	0	0.03	0	0.04	0.14	0.09	0.08	0.07	0	0.19	0	0.14	0.04	0.01	0.07	0	0.03	0.12	0.18	0.04	0.18	0.07	0.11	0	0	0.01	0.36	0.09	0.21	0.09	0.41	0.18	0	0
XLOC_000811	0.04	0.1	0.05	0	0.07	0.03	0	0	0.87	0.12	0.24	0.2	0.43	0.39	0	0.02	0.2	0.24	0.11	0.22	0.03	0.05	0.24	0	0.04	0.56	0.15	0	0.02	0.02	0	0.05	0.69	0.31	0.21	0.07	0.13	0.16	0.26	0	0.23	0.08	0.08	0	0.09	0.64	0.26	0.1	0.3
XLOC_000812	0.32	0.18	0.27	0.12	0.57	0.28	0.05	0.18	0	0	0	0	0	0	0	0	0	0	0	0	0	0	0	0.03	0	0	0	0.09	0	0	0	0	0	0	0	0	0	0	0	0	0	0	0	0	0	0	0	0	0
XLOC_000813	0.27	0.25	0.12	0.21	0.11	0.23	0.05	0.14	0.19	0.03	0	0	0.17	0.24	0.12	0.03	0	0.27	0	0	0.05	0.13	0.13	0.09	0.18	0.18	0.33	0	0.03	0.13	0.03	0.23	0.08	0.24	0.5	0.32	0.05	0.28	0.12	0	0.24	0.09	0.12	0.16	0.1	0.19	0.04	0.22	0.3
XLOC_000814	0	0	0	0.01	0.02	0	0	0	0.31	0.24	0.39	0.57	0.27	0.06	0.24	0.21	0.27	0.3	0.29	0.65	0.34	0.1	0.17	0.21	0.17	0.07	0.17	0.5	0.27	0.08	0.19	0.16	0.2	0.14	0.14	0.34	0.52	0.05	0.13	0.18	0.18	0.41	0.2	0.37	0.09	0.03	0.11	0.07	0.27
XLOC_000815	0	0	0	0	0	0	0	0	0	0	0	0	0	0	0	0	0	0	0	0	0	0	0	0	0	0	0	0	0	0	0	0	0	0	0	0	0	0	0	0	0	0	0	0	0	0	0	0	0
XLOC_000816	0.04	0	0.06	0	0	0	0	0	0.39	0.21	0.25	0.4	0.17	0.18	0.22	0.21	0.14	0.54	0.27	0.39	0.2	0.16	0.18	0.23	0.52	0.41	0.1	0.35	0.19	0.03	0.02	0.05	0.23	0.46	0.21	0.87	0.23	0.14	0	0.05	0.02	0.68	0.27	0.54	0	0	0.06	0.12	0.3
XLOC_000817	0	0	0	0.06	0	0	0	0	0.28	0.43	0.08	0.35	0.4	0.33	0.49	0.31	0.31	0.23	0.06	0.21	0.07	0.07	0.16	0.12	0.27	0.21	0.03	0.12	0.21	0.1	0	0.04	0.33	0.1	0.13	0.16	0.12	0	0.09	0.23	0.29	0.03	0.11	0.15	0.05	0.1	0	0.16	0.05
XLOC_000818	0	0	0.06	0	0.34	0	0.04	0.04	0.44	0.58	0.27	0.3	0.31	0.45	0.19	0.25	0.07	0.06	0.09	0.17	0.08	0.48	0.31	0.23	0.05	0.05	0.2	0.25	0.14	0.05	0.02	0.24	0.13	0.23	0.08	0.04	0.3	0	0	0.1	0.07	0.02	0.27	0.24	0	0.24	0.06	0.09	0.05
XLOC_000819	0.3	0.45	0.24	0.35	0.03	0.41	0.23	0.39	0.55	0.57	0.72	0.89	0.28	0.92	0.98	0.56	0.38	0.43	0.61	0.59	0.3	0.5	0.99	0.54	0.68	0.65	0.45	0.59	0.22	0.94	0.31	0.19	0.36	0	0.31	0.54	0.26	0.63	0.67	0.22	0.72	0.42	0.87	1.09	0.34	0.7	1.89	0.62	0.44
XLOC_000820	0	0	0	0	0	0	0	0	0	0	0	0	0	0	0	0	0	0	0	0	0	0	0	0	0	0	0	0	0	0	0	0	0	0	0	0	0	0	0	0	0	0	0	0	0	0	0	0	0
XLOC_000821	0.07	0.23	0.07	0.5	0.1	0.23	0.22	0.18	0.04	0.3	0.31	0.07	0.25	0.21	0.24	0.04	0.05	0.1	0.17	0.2	0.15	0.04	0.19	0.09	0.15	0.13	0.15	0.05	0.13	0.08	0.09	0	0.41	0.17	0.38	0.07	0.58	0.07	0.16	0.19	0.04	0	0.13	0.03	0.42	0.22	0.02	0.18	0.11
XLOC_000822	1.4	2.12	2	1.83	2.3	2.32	2.03	2.21	0.16	0.13	0.13	0.21	0.19	0.37	0.26	0.21	0.19	0.21	0.2	0.22	0.15	0.18	0.19	0.31	0.27	0.2	0.33	0.19	0.13	0.29	0.12	0.29	0.13	0.15	0.18	0.32	0.21	0.23	0.04	0.2	0.13	0.14	0.27	0.29	0.23	0.3	0.16	0.18	0.14
XLOC_000823	0.57	0.49	0.51	0.5	0.14	0.49	0.06	0.21	0.04	0.06	0.16	0.07	0.05	0.15	0.05	0.01	0.04	0.03	0.05	0	0.02	0	0	0.02	0.01	0.05	0.04	0.01	0.03	0.08	0	0.09	0	0.03	0.04	0.09	0.02	0.12	0.08	0.05	0.09	0.06	0.03	0.04	0	0.06	0.03	0	0
XLOC_000824	100.42	103.94	102.71	106.2	117.21	122.62	118.19	94.49	106.74	99.02	104.46	95.27	82.81	76.49	78.86	95.67	128.32	116.24	159.44	130.72	147.5	154.28	150.84	128.03	111.99	108.39	116.71	113.86	125.03	121.1	146.4	111.1	86.18	82.63	86.03	83.3	108.06	99.34	96.25	87	113.38	95.75	104.05	104.03	108.35	116.84	103.81	106.72	129.4
XLOC_000825	1	1.75	0.75	0.73	0.75	1.74	0.94	1	0.04	0.11	0.08	0.06	0.16	0.11	0.08	0.03	0.02	0.1	0.01	0.06	0.05	0.13	0.09	0.04	0.01	0.09	0.02	0.03	0.13	0.09	0	0.08	0.08	0.1	0.05	0.01	0.07	0.13	0.02	0	0.08	0.08	0.13	0.09	0.26	0.13	0.08	0.04	0.06
XLOC_000826	0.76	1.09	0.79	0.78	0.47	1	0.72	0.54	0.05	0.02	0.08	0.1	0.12	0.04	0.05	0.02	0.04	0.03	0.04	0.02	0.01	0.04	0.04	0.02	0.07	0.1	0.07	0.07	0.01	0.09	0	0.04	0.01	0.03	0.02	0.03	0.01	0.05	0.02	0.03	0.02	0.09	0.07	0.07	0.04	0.17	0.06	0.03	0.03
XLOC_000827	38.22	45.84	44.03	58.83	58.01	74.4	67.31	57.91	77.65	85.69	84.61	96.53	92.01	97.21	83.99	96.69	93.8	83.75	90.57	98.68	97.98	92.45	94.74	91.23	87.01	90.71	77.45	93.37	88.92	77.23	89.68	74.61	64.76	71.28	67.95	81.75	123.31	107.6	106.06	101.61	78.55	68.18	47.47	55.79	66.07	58.61	58.35	57.97	86.18
XLOC_000828	0.05	0.11	0	0.09	0.05	0.05	0.65	0.05	0.1	0.03	0.65	0	0.03	0	0	0	0.25	0.31	0.05	0.05	0.34	0.26	0.13	0.23	0.48	0.42	0.12	0.28	0.24	0.26	0.67	0.1	0.2	0.12	0.3	0.32	0	0.34	0.13	0.12	0	0.06	0	0.03	0	0	0.04	0	0.37
XLOC_000829	0.06	0.01	0.09	0.12	0.02	0.02	0.12	0	0.02	0	0.04	0.02	0.01	0.05	0.01	0.04	0.21	0.16	0.04	0.06	0.06	0.13	0.07	0.07	0.39	0.13	0	0.08	0.07	0.07	0.1	0	0.14	0	0.02	0.16	0.05	0.3	0.02	0.05	0.01	0.02	0	0	0.02	0	0.23	0	0.33
XLOC_000830	0.44	0.38	0.24	0.21	0.69	0.47	0.38	0.25	0.96	1.05	0.55	0.57	1.19	1.19	0.85	0.8	0.7	0.96	0.5	0.44	0.71	0.94	0.42	0.64	0.75	0.89	0.54	0.53	1.16	0.86	0.48	0.69	0.9	1.04	0.56	0.6	1.18	1.15	0.56	0.8	0.86	0.78	0.39	0.45	0.83	0.97	0.57	0.82	0.89
XLOC_000831	0.03	0	0.03	0.01	0.02	0.03	0.02	0	0.75	0.55	1.34	0.53	0.35	0.48	0.25	0.85	3.48	2.85	3.01	3.23	1.93	3.12	2.2	2.45	3	2.1	1.64	2.24	1.69	2.43	2.1	3.33	2.65	2.02	1.87	1.67	1.51	1.9	1.33	1.83	4.12	3.46	3.31	5.32	2.55	3.69	3.25	4.09	3.48
XLOC_000832	0	0	0	0	0	0	0	0	0.02	0.06	0.02	0	0.04	0	0.02	0.09	0.03	0.06	0.08	0	0.14	0	0	0.5	0	0	0	0	0	0.07	0	0	0	0	0.07	0	0.1	0	0	0	0	0.02	0.09	0	0	0	0	0	0.04
XLOC_000833	0	0	0	0	0	0	0	0	0.19	0.25	0.06	0	0.16	0.03	0.29	0.01	0.13	0.07	0.13	0.12	0.04	0.06	0.08	0.17	0.18	0	0.14	0.12	0.28	0	0.07	0.05	0	0.06	0.05	0	0.21	0.33	0.14	0.03	0.16	0.07	0	0	0.09	0.01	0.1	0.08	0.06
XLOC_000834	0	0.02	0.02	0.01	0.01	0.12	0.01	0	0	0.03	0.01	0.03	0.02	0.03	0.02	0	0.34	0.19	0.54	0.35	0.64	0.34	0.27	0.31	0.38	0.61	0.33	0.31	0.79	0.59	0.72	0.69	0.04	0.11	0.06	0	0.1	0.18	0.2	0.21	0.64	0.53	1.38	1.2	1.94	2.21	1.41	1.5	0.25
XLOC_000835	0.04	0.01	0.01	0.01	0.02	0.03	0.02	0.01	0.01	0	0.03	0.04	0	0	0.01	0.01	0.09	0.02	0.05	0.12	0.21	0.25	0.19	0.13	0.09	0.18	0.25	0.11	0.3	0.31	0.34	0.4	0.12	0.06	0.02	0.02	0.01	0.06	0.02	0.11	0.27	0.32	0.35	0.6	0.86	0.72	0.31	0.66	0.1
XLOC_000836	0.57	0.67	1.04	0.49	0.12	0.86	0.43	0.45	0.11	0.03	0.03	0.08	0.09	0.06	0.12	0.25	0.02	0.09	0.04	0.04	0.15	0.03	0.05	0.07	0.01	0.03	0.14	0.02	0	0.03	0.07	0.03	0.05	0.08	0.18	0.02	0.04	0.13	0.15	0	0.02	0.19	0.1	0.1	0.08	0.01	0.01	0.19	0.02
XLOC_000837	0.15	0.04	0.12	0.09	0.12	0.09	0.07	0.09	0.19	0.06	0.4	0.15	0.21	0.14	0.13	0.22	0.27	0.07	0.22	0.14	0.37	0.25	0.25	0.17	0.3	0.16	0.3	0.12	0.21	0.22	0.33	0.1	0.16	0.09	0.27	0.06	0.19	0.07	0.29	0.21	0.36	0.09	0.14	0.26	0.28	0.12	0.11	0.21	0.18
XLOC_000838	0	0.04	0	0	0.11	0	0.16	0	0.07	0.15	0.09	0.15	0.16	0.13	0.03	0.17	0.54	0.25	0.06	0.11	0.05	0.14	0.09	0.25	0.07	0.13	0.07	0.03	0	0	0	0.04	0.68	0.35	0	0.06	0.15	0	0.07	0.2	0	0	0.07	0.18	0.38	0.11	0.16	0.12	0.2
XLOC_000839	0.13	0.16	0.19	0.29	0.17	0.43	0.36	0.12	0.05	0.16	0.14	0.03	0.21	0.16	0.43	0.18	0.13	0.11	0.33	0.13	0.06	0	0.93	0.15	0.16	0.11	0.37	0.12	0.16	0.41	0.36	0.17	0.44	0.19	0.26	0.06	0.06	0.11	0.38	0.22	0.11	0.06	0.46	0.12	0.03	0.13	0.56	0.29	0.2
XLOC_000840	0.09	0.3	0.41	0.03	0.04	0.11	0.16	0.15	0.05	0.25	0.59	0.19	0.12	0	0.24	0.2	0.1	0.12	0.66	0.09	0.04	0.16	0.35	0.04	0.27	0	0.42	0.11	0	0.1	0.54	0.08	0	0.03	0.33	0.6	0.19	0.05	0.05	0.69	0.27	0.02	0.15	0.02	0	0.26	0.27	0	0.2
XLOC_000841	0	0	0	0	0	0	0	0	0	0	0	0	0.04	0	0.11	0	0	0.05	0.07	0.06	0.24	0.16	0.42	0	0.11	0	0.04	0.38	0.54	0.08	0	0	0	0	0.12	0	0.63	0	0.31	0.23	0	0	0	0	0	0	0	0	0
XLOC_000842	0.26	0.03	0.55	0.12	0.06	0.17	0.04	0.15	0.11	0.09	0.26	0.11	0.12	0.02	0.19	0.19	0.02	0.27	0.02	0.08	0.08	0.18	0.1	0.04	0.02	0.22	0.32	0.11	0.07	0.17	0.27	0.29	0.09	0	0.14	0.06	0.04	0.04	0.25	0	0.16	0.26	0.43	0.36	0.61	0.31	0.38	0.27	0.29
XLOC_000843	0.29	0.78	0.47	0.59	0.39	0.64	0.51	0.24	0	0	0	0	0	0	0	0	0	0	0	0	0	0	0	0	0	0	0	0	0	0	0	0	0	0	0	0	0	0	0	0	0	0	0	0	0	0	0	0	0
XLOC_000844	0.11	0.31	0.11	0.33	0.15	0.15	0.28	0.19	0.27	0.21	0.07	0.13	0.37	0.36	0.31	0.21	0.18	0.19	0.13	0.12	0.23	0.18	0.19	0.3	0.19	0.09	0.11	0.15	0.12	0.16	0.22	0.12	0.15	0.2	0.2	0.15	0.14	0.33	0.33	0.12	0.04	0.19	0.05	0.12	0.3	0.21	0.28	0.1	0.15
XLOC_000845	0	0	0	0	0	0	0	0	0	0	0	0	0	0	0	0	0	0	0	0	0	0	0	0	0	0	0	0	0	0	0	0	0	0	0	0	0	0	0	0	0	0.33	0	0	0	0	0	0	0
XLOC_000846	0	0	0.07	0	0.25	0.09	0	0.09	0	0.33	0.13	0	0.06	0	0	0.09	0	0	0	0	0	0	0.08	0	0	0.06	0	0.11	0.03	0	0	0.06	0	0	0.1	0	0	0	0	0	0.06	0.11	0.17	0	0.21	0	0.07	0	0
XLOC_000847	0	0	0	0	0.13	0	0.08	0	0.11	0.14	0.12	0	0.15	0	0.03	0.16	0.07	0.23	0.05	0	0.21	0	0.18	0.04	0	0.05	0.08	0.17	0	0.05	0.15	0	0.16	0	0.04	0	0.12	0.28	0.21	0	0.2	0.12	0	0	0.05	0.03	0.03	0	0
XLOC_000848	0	0	0	0	0	0	0	0	0.06	0.36	0.06	0.05	0.04	0	0	0.11	0	0.03	0	0	0	0	0	0	0	0	0	0	0	0	0	0	0	0	0	0.12	0	0.05	0.03	0.08	0	0	0	0	0	0	0	0	0
XLOC_000849	0.03	0	0	0	0	0	0	0	0.1	0.06	0.12	0.06	0	0	0.02	0	0.09	0.1	0	0.17	0.18	0.18	0.05	0.05	0.05	0.03	0.37	0.07	0	0.1	0.03	0.04	0.23	0	0.19	0.06	0.07	0.18	0	0.07	0.22	0.13	0.16	0.07	0.07	0.09	0.08	0.14	0.03
XLOC_000850	0	0	0	0	0	0	0	0	0	0	0.13	0	0	0	0	0	0.19	0	0.36	0	0	0	0	0.06	0.04	0	0	0.18	0	0	0.15	0	0.3	0	0	0	0	0	0	0	1.06	0.38	0	0	0	0.02	0	0	0.16
XLOC_000851	0	0	0	0	0	0	0	0	0.39	0.03	0.07	0.1	0	0.04	0.04	0	0.05	0.05	0.16	0.31	0.14	0.35	0.28	0.19	0.11	0.03	0	0.2	0.36	0.32	0.17	0.27	0.32	0.35	0	0.16	0.11	0.1	0.3	0.22	0.04	0	0	0.08	0	0.12	0.22	0	0.07
XLOC_000852	0	0	0	0	0	0	0	0	0	0	0	0	0	0	0	0	0	0	0	0	0	0	0	0	0	0	0	0	0	0	0	0	0	0	0	0	0	0	0	0	0	0	0	0	0	0	0	0	0
XLOC_000853	0.19	0.03	0	0	0.1	0.21	0	0.09	0.31	0.03	0.13	0	0.13	0	0	0.11	0	0.03	0	0.14	0.48	0.24	0.04	0.04	0.08	0.05	0.14	0.18	0.39	0.29	0	0.27	0.18	0.04	0.23	0	0.25	0.15	0	0.27	0.21	0.05	0.05	0.12	0.37	0.47	0.16	0.3	0.05
XLOC_000854	0.23	0.1	0.11	0.06	0.07	0.19	0.14	0.07	0.09	0.08	0.16	0.2	0.08	0.25	0.29	0	0.17	0.05	0.15	0.44	0.14	0	0.24	0.13	0.17	0.04	0.38	0.86	0	0.85	0.36	0	0.05	0.5	0.35	0.22	0	0	0.26	0.08	0.12	0.12	0	0.27	0.27	0.05	0.2	0.05	0.17
XLOC_000855	0	0	0	0	0	0	0	0	0	0	0	0	0	0.02	0	0	0.05	0.12	0.03	0	0	0	0	0.06	0	0	0	0.02	0	0	0	0	0	0	0	0	0	0.07	0	0.08	0	0	0	0	0	0	0	0	0
XLOC_000856	0.43	0.29	0	0.15	0.18	0.11	0.06	0.27	1.2	0.75	1.7	0.49	0.13	0.24	0.07	0.29	5.1	4.5	1.94	2.59	1.46	1.88	2.21	1.75	2.18	1.8	1.18	2.86	0.96	0.66	1.09	0.8	0.85	1.24	0.69	1.03	0.21	1.09	0.72	0.14	0.61	0.51	0.03	0.5	0.95	0.48	0.38	0.71	3.21
XLOC_000857	0.08	0.03	0	0.03	0.04	0.13	0.35	0.1	0.09	0.08	0.08	0	0.08	0.17	0.04	0.02	0.09	0.14	0.08	0.04	0.21	0.19	0.12	0.16	0	0.4	0.02	0.08	0.02	0.07	0.45	0.07	0.11	0.03	0.14	0.07	0.07	0.08	0.22	0	0	0.08	0.19	0.25	0	0	0.23	0.1	0
XLOC_000858	0.45	0.58	1	0.71	1.74	2.3	2.5	2.47	0.28	0.38	0.39	0.43	0.51	0.46	0.39	0.46	0.49	0.63	0.59	0.64	0.8	0.67	0.71	0.63	0.53	0.61	0.54	0.6	0.64	0.67	0.72	0.65	0.47	0.43	0.4	0.32	0.47	0.35	0.46	0.45	0.84	0.9	0.8	0.9	1.3	0.91	0.83	1.08	0.58
XLOC_000859	1.78	2.1	2.45	1.98	2.32	2.38	2.77	2.12	4.06	4.06	6.61	4.26	5.55	5.65	3.75	4.86	9.98	12.89	12.77	11.04	9.96	11.12	9.79	9.69	10.06	8.76	9.99	9.6	9.44	9.2	12.66	10.93	6.8	7.19	6.08	3.69	3.83	4.29	5.09	3.38	14.17	17.21	17.23	15.84	14.13	19.17	12.93	15.89	10.54
XLOC_000860	0	0	0	0	0	0	0	0.05	0.22	0.34	0.21	0.31	0.14	0.35	0.22	0.17	0.33	0.21	0.62	0.83	0.48	0.36	0.27	0.2	0.19	0.03	0.84	0.28	0.08	0.32	0.09	0	0.21	0.26	0.12	0.36	0.25	0.22	0	0.3	0.06	0.35	0.06	0.13	0.27	0.26	0.04	0.04	0.54
XLOC_000861	0.03	0.03	0.03	0.2	0.01	0.17	0.03	0.41	0.14	0.09	0.06	0.25	0.05	0.13	0.38	0.51	0	0.03	0.09	0.17	0	0.21	0.16	0.51	0.13	0.06	0.15	0.23	0.06	0.32	0.28	1.03	0.59	0.13	0.47	0.75	0.03	0.44	0.57	2.63	0.26	0.03	0.09	0.69	0.08	0.21	0.42	0.45	0.09
XLOC_000862	0.08	0.05	0.07	0.21	0.06	0.52	0.37	0.28	0.17	0.17	0.3	0.32	0.01	0.19	0.64	0.33	0.07	0.15	0.24	0.14	0	0.3	0.15	0.24	0.33	0.23	0.5	0.25	0.08	0.52	0.32	0.62	0.6	0.42	1.56	1.76	0.13	1.47	1.25	1.24	0.17	0.29	0.51	0.79	0.03	0.23	0.65	0.41	0.1
XLOC_000863	0	0	0	0	0	0	0	0	0	0	0	0	0	0	0.04	0.05	0	0	0	0	0.07	0	0	0	0	0	0	0	0	0	0.56	0.05	0	0	0	0	0	0	0.09	0	0.31	0	0.04	0	0	0.1	0	0	0.09
XLOC_000864	0	0	0	0	0	0	0	0	0	0.06	0	0.1	0	0	0	0	0	0	0	0	0	0	0	0	0	0	0	0	0	0	0	0	0	0	0.23	0	0.11	0.76	0	0.28	0	0	0	0	0	0	0	0	0
XLOC_000865	2.16	2.15	2.42	1.64	2.17	3.1	2.57	2.21	2.63	3.25	2.39	2.44	2.89	2.22	1.78	2.52	4.83	3.39	3.44	3.69	3.94	3.73	3.66	4.13	4.07	3.98	3.84	4.38	3.16	2.49	3.46	3.14	3.92	2.74	2.13	3.26	3.22	4.24	3.32	3.33	5.94	4.95	2.99	3.98	4.15	3.8	4.84	4.92	4.22
XLOC_000866	4.47	3.61	4.18	3.87	5.29	5.02	4.66	5.29	4.06	3.66	3.7	3.18	2.83	2.79	2.92	2.96	2.78	2.65	3.14	2.89	2.87	2.86	3.31	3.1	2.15	2.7	2.42	2.69	2.79	2.61	3.07	2.84	3.11	2.62	4.12	2.68	2.75	2.91	3.08	2.98	2.58	3.04	3.58	3.06	3.26	3.45	3.27	2.94	2.38
XLOC_000867	0.43	0.41	0.54	0.34	0.42	0.39	0.84	0.73	0.29	0.24	0.17	0.39	0.35	0.2	0.44	0.19	0.15	0.15	0.23	0.4	0.31	0.33	0.57	0.52	0.37	0.35	0.22	0.13	0.37	0.41	0.48	0.55	0.16	0.61	0.18	0.26	0.28	0.63	0.46	0.16	0.31	0.18	0.29	0.38	0.37	0.3	0.42	0.29	0.18
XLOC_000868	0.78	0.73	1.26	1.05	0.34	0.89	0.76	0.93	0.58	0.34	0.49	0.54	0.43	0.67	0.59	0.25	0.18	0.23	0.39	0.33	0.26	0.3	0.37	0.31	0.28	0.12	0.75	0.33	0.24	0.33	0.07	0.29	0.35	0.63	0.34	0.25	0.17	0.4	0.42	0.52	0.14	0.21	0.42	0.36	0.38	0.41	0.45	0.15	0.07
XLOC_000869	0.87	0.89	0.61	0.35	0.83	1.23	1.02	0.49	0	0.23	0.03	0	0.06	0.05	0.06	0.05	0.04	0.04	0.09	0.11	0.03	0.07	0.09	0.07	0.2	0.05	0	0.05	0.07	0.09	0	0	0.19	0.17	0.03	0.06	0	0	0	0	0.58	0.26	0.15	0.03	0.14	0.16	0.16	0.02	0.03
XLOC_000870	1.43	1.48	1.44	1.08	1.04	0.83	1.45	1.13	1.04	1.16	1.34	1.07	0.81	1.2	0.95	1.2	1.44	1.6	1.3	1.13	1.07	1.33	1.23	0.85	1.59	1.3	1.19	1.53	1	1.15	1.35	1.15	1.21	1.29	1.07	0.83	1.14	1.33	1.19	1.13	0.96	1.45	1.55	1.02	1.4	0.99	1.51	1.1	1.38
XLOC_000871	0.12	0.08	0.12	0.18	0.12	0.04	0.13	0.17	0.16	0.04	0.2	0.12	0.09	0.16	0.16	0.14	0.19	0.2	0.11	0.22	0.12	0.22	0.09	0.26	0.28	0.14	0.36	0.38	0.19	0.08	0.07	0.29	0.33	0.15	0.29	0.29	0.19	0.04	0.25	0.25	0.19	0.04	0.12	0.15	0.11	0.05	0.19	0.36	0.2
XLOC_000872	0	0	0.04	0	0	0	0	0	0.04	0.13	0.29	0.06	0.13	0.21	0.37	0.04	0.42	0.92	0.43	0.18	0.61	0.3	0.73	0.16	0.45	0.5	0.27	0.1	0.53	0.29	0.07	0.15	1.9	1.86	0.17	0.9	0.11	0.19	0.07	0.21	0.57	2.34	1.13	0.71	0.72	0.48	0.58	0.66	0.28
XLOC_000873	0	0.16	0	0.46	0.06	0.1	0.05	0.36	0.07	0.12	0.09	0.12	0.09	0	0.1	0.03	0.04	0	0	0.22	0	0.07	0.14	0.05	0.03	0.06	0.29	0.3	0.14	0.28	0.03	0.11	0.42	0.17	0	0.17	0	0.06	0.4	0	0.1	0.03	0.13	0.41	0.07	0.07	0.23	0.08	0
XLOC_000874	0.27	0	0.12	0.07	0.33	0.32	0.13	0.15	0.17	0.11	0.22	0.15	0.16	0.13	0.01	0.29	0.29	0.12	0.13	0.12	0.08	0.05	0.1	0.07	0.06	0.37	0.06	0	0.03	0.04	0.38	0.17	0.15	0.14	0.21	0.12	0.11	0	0.19	0	0.18	0.01	0.19	0.34	0.33	0.36	0.3	0.16	0.14
XLOC_000875	0.15	0.32	0.24	0.28	0.15	0.1	0.11	0.26	0.14	0.27	0.06	0.06	0.1	0	0.02	0	0.18	0.38	0.24	0.47	0.14	0.11	0.21	0.67	0.15	0.02	0.27	0.12	0	0.09	0.21	0.79	0.48	0.04	0.06	0.06	0	0.06	0	0	0.46	0.57	0.17	0.26	0.23	0.23	1.04	0.32	0.34
XLOC_000876	0.43	1.06	1.13	0.47	0.56	0.79	1.41	1.41	2.56	3.97	2.7	1.83	1.84	3.58	6.02	4.05	0.38	0.45	0.41	0.36	0.52	0.35	0.84	0.87	0.35	0.61	1.08	0.37	0.88	0.57	0.65	1.24	0.43	1.13	1.32	1.34	1.3	1.71	6.77	3.11	0.02	0.17	0.58	0.5	0.56	0.44	0.8	0.4	0.25
XLOC_000877	0.73	0.24	0.19	0.26	0.71	0.56	0.35	0.5	0.28	0.67	0.34	0.3	0.6	0.41	0.4	0.41	0.25	0.6	0.27	0.26	0.41	0.23	0.41	0.18	0.5	0.47	0.38	0.34	0.08	0.39	0.07	0.4	0.68	0.44	0.3	0.32	0.05	0.39	0.37	0.15	0.52	0.44	0.57	0.46	0.62	0.45	0.46	0.13	0.27
XLOC_000878	0.72	0.82	0.62	0.74	0.76	0.77	0.77	0.91	0.36	0.29	0.24	0.3	0.34	0.13	0.35	0.4	0.4	0.2	0.24	0.07	0.49	0.34	0.32	0.4	0.17	0.23	0.46	0.11	0.09	0.75	0.1	0.31	0.42	0.16	0.46	0.11	0.18	0.58	0.35	0.32	0.4	0.36	0.4	0.52	0.88	0.49	0.54	0.36	0.32
XLOC_000879	33.15	40.59	37.06	31.53	35.38	31.37	30.86	39.68	60.52	69.87	62.89	59.16	55.5	52.26	54.6	63.61	73.96	90.84	71.31	84.07	68.39	78.02	86.84	68.87	50.5	56.6	53.76	63.08	53.85	53.84	50.83	55.09	49.55	52.94	55.53	47.71	58.83	49.8	64.34	49.53	47.31	62.15	55.6	53.27	57.32	53.24	69.62	64.02	65.24
XLOC_000880	8.39	10.85	11.36	11.01	12.3	16.96	10.75	8.02	13.9	16.38	14.73	12.82	9.53	12.55	9.04	10.62	11.31	11.83	15.09	14.1	15.53	16.1	13.73	11.16	11.15	14.53	11.78	13.85	14.83	15.83	16.65	13.56	11.05	12.91	16.96	14.07	17.88	19.35	12.58	14.16	9.3	11.82	11.56	11.4	12.71	14.33	9.99	9.03	12.8
XLOC_000881	0.27	0.25	0.3	0.24	0.31	0.37	0.3	0.17	0.39	0.28	0.51	0.42	0.27	0.43	0.36	0.13	0.41	0.19	0.41	0.33	0.25	0.31	0.21	0.15	0.31	0.22	0.35	0.36	0.21	0.33	0.38	0.15	0.38	0.42	0.56	0.59	0.35	0.68	0.5	0.21	0.33	0.42	0.58	0.28	0.21	0.3	0.45	0.11	0.39
XLOC_000882	1.14	0.9	0.85	0.85	0.48	0.61	0.77	0.79	0.16	0.21	0.25	0.24	0.23	0.28	0.39	0.37	0.26	0.37	0.11	0.22	0.19	0.31	0.28	0.47	0.17	0.22	0.36	0.12	0.11	0.4	0.37	0.15	0.22	0.42	0.33	0.29	0.12	0.36	0.39	0.35	0.57	0.23	0.46	0.53	0.22	0.41	0.57	0.47	0.3
XLOC_000883	0.15	0.3	0.16	0.31	0.05	0.29	0.33	0.49	0.2	0.09	0.3	0.28	0.3	0.27	0.09	0.08	0.36	0.5	0.71	0.54	0.53	0.74	0.71	0.62	0.38	0.2	0.41	0.48	0.39	0.38	0.26	0.27	0.77	0.54	1.22	0.45	0.77	0.8	0.31	0.44	0.29	0.76	0.3	0.27	0.63	0.28	0.79	0.49	0.27
XLOC_000884	0.44	0.32	0.24	0.29	0	0	0.09	0.09	0.3	0.14	0.33	0.2	0.22	0.04	0.22	0.02	0.91	0.22	0.1	0.3	0.34	0.12	0.19	0.32	0.59	0.48	0.15	0.39	0.15	0.44	0.2	0.19	0.15	0.18	0.44	0.4	0.26	0.25	0.24	0	0.88	0.22	0.09	0.15	0.66	0.24	0.21	0.07	0.34
XLOC_000885	1.86	1.85	2.07	1.97	3.3	1.59	1.9	2.32	0.74	0.71	1.45	1.1	1.89	0.98	1.08	1.36	1.19	1.1	2.04	1.97	2.78	1.32	0.97	1.31	1.24	0.88	1.5	1.61	1.55	1.06	0.91	0.81	1.04	0.85	0.98	0.94	1.38	0.65	0.79	0.77	0.87	0.87	1.43	1.38	2.07	0.7	1.23	0.85	0.82
XLOC_000886	2.69	3.34	4.29	3.75	3.44	4.79	3.72	3.55	0.26	0.15	0.8	0.23	0.08	0.07	0.22	0.06	0.45	0.35	0.49	0.43	0.47	0.39	0.62	0.5	0.37	0.29	0.34	0.51	0.34	0.29	0.39	0.22	0.44	0.33	0.35	0.43	0.2	0.27	0.23	0.16	0.07	0.04	0.3	0.32	0.22	0.26	0.33	0.31	0.27
XLOC_000887	5.2	5.15	5.14	5.07	4.75	4.9	4.61	4.63	3.04	2.97	3.01	2.87	2.45	2.07	1.92	2.21	3.47	2.97	2.85	3.28	2.92	3	3.23	3.19	3.62	3.1	2.8	2.74	3.39	2.53	3.69	2.63	3.15	2.89	2.6	2.52	2.49	2.15	2.04	2.02	4.77	3.91	3.6	3.78	3.92	3.36	3.37	3.68	3.46
XLOC_000888	0.35	0.17	0.51	0.16	0.39	0.37	0.35	0.33	0.15	0.17	0.12	0.08	0.18	0.18	0.26	0.12	0.23	0.11	0.05	0.12	0.2	0.06	0.22	0.04	0.27	0.06	0.25	0.16	0.05	0.15	0.19	0.12	0.04	0.22	0.23	0.07	0.17	0.1	0.17	0.06	0.18	0.03	0.2	0.29	0.04	0.09	0.22	0.03	0.06
XLOC_000889	0.92	0.68	0.88	1.07	1.49	1.36	1.06	1.23	1.03	0.83	0.88	1.06	1	1.05	1.08	0.88	1.01	0.73	1.64	1.18	1	1.48	0.88	0.93	1.15	0.72	0.85	1.01	1.06	1.17	1.08	1.11	0.98	0.65	0.57	0.87	0.69	0.63	0.94	0.66	1.89	1.27	1.19	1.22	1.21	1.66	1.32	1.46	1.21
XLOC_000890	0.34	0.22	0.36	0.18	0.86	0.42	0.35	0.4	0.46	0.6	0.56	0.54	0.86	0.87	0.8	0.71	0.49	0.47	0.5	0.37	0.51	0.46	0.45	0.45	0.32	0.54	0.47	0.21	0.46	0.44	0.34	0.36	0.8	0.37	0.32	0.25	0.62	0.46	0.63	0.51	0.36	0.4	0.66	0.19	0.42	0.36	0.46	0.41	0.37
XLOC_000891	0.13	0.16	0	0.03	0.56	0.12	0.21	0.15	0.8	0.46	0.07	0.23	0.5	0.51	0.35	0.19	0.21	0.19	0.17	0.32	0.51	0.2	0.24	0.2	0.37	0.09	0.39	0.33	0.31	0.52	0.05	0.06	0.56	0.42	0.16	0.55	0	0.03	0	0.11	0.26	0.53	0.24	0.13	0.63	0.42	0.2	0.05	0.19
XLOC_000892	0	0.18	0.27	0.02	0	0.2	0.13	0.08	0.34	0.31	0.44	0.36	0.49	0.46	0.34	0.2	0.36	0.13	0.18	0.2	0.16	0.18	0.07	0.13	0.12	0.11	0.13	0.38	0.26	0.12	0.16	0	0.13	0.07	0.22	0.17	0.18	0.27	0.37	0.07	0.02	0.14	0.07	0.13	0.19	0.07	0.4	0.4	0
XLOC_000893	2.12	2.05	2.72	2.38	2.8	2.66	2.04	2.54	2.12	2.25	3.17	2.53	2.2	2.13	1.97	2.46	1.9	1.87	2.51	2.68	2.45	2.64	2.36	2.3	1.99	2.25	2.59	2.69	2.81	2.11	3	2.72	2.23	2.61	3.64	3.17	2.9	2.64	2.57	3.23	1.67	1.67	2.87	2.49	2.73	2.42	2.26	2.58	1.97
XLOC_000894	0	0.05	0	0	0	0	0	0	0	0	0	0	0	0	0	0	0.1	0.12	0	0.1	0	0	0	0	0.04	0	0	0	0.13	0	0	0	0.1	0	0.06	0	0	0	0	0	0	0	0	0	0	0	0	0	0.08
XLOC_000895	1.16	1.85	0.67	1.13	1.16	1.31	1.4	1.42	0.5	0.34	0.31	0.61	0.59	0.34	0.57	0.43	0.47	0.58	0.19	0.24	0.68	0.56	0.6	0.55	0.34	0.61	0.52	0.34	0.35	0.54	0.44	0.7	0.9	0.76	0.36	0.31	0.38	0.52	0.66	0.41	0.89	1.21	0.42	0.49	0.98	0.71	0.9	0.57	0.9
XLOC_000896	0.04	0.1	0.08	0	0.11	0.04	0.04	0.11	0.06	0.1	0.06	0.08	0.01	0.05	0	0.04	0.28	0.23	0.2	0.4	0.1	0.42	0.14	0.24	0.17	0.07	0.08	0.08	0.04	0.14	0.02	0.15	0.14	0.16	0.08	0.27	0.04	0.36	0	0.15	0.43	0.14	0.35	0.25	0.38	0.42	0.13	0.4	0.17
XLOC_000897	0.03	0	0	0	0	0	0	0	0	0	0	0	0	0	0	0	0.27	0	0.05	0	0.05	0	0	0.09	0.13	0.03	0.07	0	0.19	0.09	0.07	0.05	0	0.04	0	0	0	0	0	0	0	0.03	0	0	0	0	0	0	0.37
XLOC_000898	0.54	0.44	0.45	0.7	0.52	0.35	0.51	0.44	0.18	0.23	0.16	0.32	0.26	0.18	0.18	0.23	0.2	0.06	0.22	0.52	0.26	0.14	0.36	0.1	0.08	0.31	0.33	0.32	0.25	0.46	0.46	0.52	0.15	0.09	0.18	0.19	0.04	0.03	0.12	0.19	0.26	0.33	0.36	0.32	0.64	0.19	0.14	0.25	0.22
XLOC_000899	16.17	16.49	17.79	17.38	17.3	16.46	16.05	16.97	26.83	27.03	25.94	26.93	27.1	27.08	25.96	26.09	28.66	29.26	25.49	20.95	21.61	19.19	19.65	18.37	40.14	32.36	27.94	26.21	29.33	24.96	31.46	28.32	26.96	27.66	26.53	23.05	30	24.02	28.49	21.39	32.64	34.25	27.77	26.74	26.45	25.45	27.95	25.07	27.24
XLOC_000900	0.45	0.88	0.49	0.16	0.42	0.31	0.21	0.46	0.26	0.14	0.15	0.04	0.06	0.13	0.23	0.32	0.02	0	0	0	0.04	0	0.02	0.04	0.11	0.06	0.06	0	0.05	0	0.01	0.05	0.12	0.1	0.36	0.06	0.32	0.21	0.22	0.38	0.06	0.04	0.02	0.06	0.04	0	0.04	0.06	0.01
XLOC_000901	0	0	0	0	0	0	0.42	0	0.18	0.48	0.47	0.32	0.04	0	0.08	0	0.17	0.05	0.15	0	0	0	0.12	0.13	0	0	0.08	0	0	0.14	0.16	0.28	0.27	0	0.07	0.3	0	0	0	0	0.17	0	0.85	0	0	0	0.05	0	0
XLOC_000902	0.79	0.79	0.73	0.81	0.76	0.76	0.28	1.22	0.96	1.04	1.11	1.05	0.79	1.33	1.08	1.27	0.57	0.67	0.47	0.5	0.44	0.55	0.54	0.67	0.33	0.29	0.55	0.39	0.28	0.22	0.2	0.66	0.34	0.4	0.33	0.19	0.44	0.66	0.52	0.48	0.29	0.48	0.96	0.46	0.66	0.36	0.47	0.66	0.59
XLOC_000903	1.04	1.12	1.37	1.19	0.98	1.06	1	0.63	0.13	0.03	0.06	0.05	0.08	0.05	0.1	0.08	0.26	0.19	0.28	0.17	0.2	0.15	0.12	0.13	0.28	0.31	0.25	0.19	0.15	0.18	0.07	0.11	0.47	0.41	0.16	0.22	0.13	0.24	0	0.05	0.43	0.39	0.27	0.25	0.13	0.39	0.13	0.08	0.37
XLOC_000904	4.25	3.99	6.21	5.19	4.3	3.5	4.04	3.5	0.41	0.32	0.57	0.64	0.51	0.58	0.95	0.37	0.81	0.95	0.91	0.73	0.79	0.67	0.74	0.97	0.94	1.58	1.81	0.9	1.12	1.37	0.64	0.79	1.16	1.19	0.89	0.61	0.53	0.71	0.44	0.69	1.37	0.99	1.03	0.89	0.78	0.89	0.51	0.73	1.22
XLOC_000905	9.19	8.92	10.09	10.2	11.94	10.01	11.84	11.17	0.79	0.62	1.03	0.9	0.55	0.76	0.87	0.98	2.9	2.8	2.5	3.41	2.12	2.51	1.83	2.19	2.32	1.44	2.26	2.9	1.07	1.38	2	1.28	1.21	1.1	0.76	1.2	0.26	0.49	0.47	0.36	2.21	2.6	3.09	1.93	1.77	1.98	2.41	2.46	4.46
XLOC_000906	0.36	0.26	0.27	0.21	0.19	0.12	0.25	0.25	0.11	0.06	0.22	0.06	0.08	0.12	0.06	0.1	0.06	0.05	0.12	0.13	0.14	0	0.09	0.11	0.07	0.01	0.21	0.08	0.08	0	0.02	0.11	0.15	0.08	0.07	0.07	0.11	0.3	0	0.13	0.08	0	0.12	0.2	0.06	0.02	0.21	0	0.15
XLOC_000907	0	0	0	0.05	0	0	0	0.11	0	0	0	0	0	0.44	0	0	0	0	0	0	0	0.15	0	0	0	0	0	0	0	0.25	0	0	0	0	0	0	0	0	0	0	0	0	0	0	0	0.18	0	0	0.07
XLOC_000908	0.86	0.89	0.92	0.77	0.66	0.89	0.44	0.84	0.7	0.78	0.19	0.6	0.98	0.72	0.65	1.03	0.75	0.32	0.51	0.33	0.71	0.58	0.69	0.52	0.2	1.28	0.33	0.13	0.5	0.9	0.75	0.56	0.6	0.89	0.65	0.52	1.05	0.89	0.52	1.35	1.07	1.3	0.37	0.77	1.01	1.17	1.36	1.3	0.94
XLOC_000909	0.76	0.23	0.33	0.12	0.12	0.18	0.31	0.17	0.44	0.04	0.23	0.19	0.12	0.19	0.29	0.04	0.79	0.19	0.2	0.1	0.13	0.41	0.49	0.14	0.73	0.27	0.08	0.05	0.24	0.2	1.01	0.05	0.85	0.13	0.1	0.29	0.09	0.15	0.65	0.2	1.12	0.14	0.33	0.24	0.28	0.51	0.73	0.02	1.07
XLOC_000910	0.21	0	0.05	0.05	0	0.06	0.26	0	0.08	0	0.04	0.04	0	0.08	0	0.12	0	0	0	0.07	0	0.42	0.17	0	0.19	0	0.08	0.04	0.17	0.08	0	0	0.15	0	0.13	0.14	0.06	0	0	0	0	0.04	0.12	0.49	0	0	0.05	0	0
XLOC_000911	0.09	0.07	0.05	0	0.02	0.02	0	0	0.14	0.17	0.12	0.06	0.02	0.11	0.11	0.14	0.1	0.34	0.13	0.09	0.06	0.27	0.14	0.13	0.07	0.06	0.16	0.2	0.34	0.05	0.2	0	0.13	0.02	0.12	0.02	0	0.09	0	0	0.14	0.28	0.15	0.11	0.19	0.09	0.34	0.03	0.02
XLOC_000912	0	0	0	0.08	0	0	0.05	0.35	0	0.11	0.03	0.08	0	0.06	0.25	0.03	0.04	0.07	0.25	0	0.09	0	0	0.17	0.03	0.47	0.11	0.36	0.09	0	0	0.03	0.04	0.33	0	0.39	0.09	0.16	0.23	0.23	0.11	0	0	0.13	0.27	0.06	0.41	0.14	0
XLOC_000913	1.18	1.08	0.64	1	1.03	0.76	0.73	1.56	0.67	0.44	0.5	0.8	0.61	0.9	0.44	0.83	0.23	0.57	0.21	0.45	0.19	0.51	1.24	1.4	0.68	0.95	0.83	0.57	0.84	0.28	0.38	0.67	0.52	1.12	0.43	0.7	0.76	0.78	0.54	0.57	0.25	0.25	0.66	0.59	0.25	0.43	0.8	0.66	0.33
XLOC_000914	1.74	1.43	1.96	1.88	1.52	0.65	1.25	1.3	1.48	1.25	0.45	0.62	1.71	1.39	2.15	0.98	1.89	1.7	0.57	1.18	1.68	1.01	0.9	0.81	2.2	2.14	1.7	1.28	0.54	1.24	0.24	0.81	2.57	1.99	0.6	0.78	0.71	0.98	0.88	0.64	1.73	2.44	1.31	1.56	1.54	1.16	1.13	0.87	1.83
XLOC_000915	0	0	0	0	0	0.03	0	0	0.05	0.07	0.1	0.09	0.18	0.22	0.02	0.15	0.02	0.04	0.08	0.01	0.02	0.03	0.02	0.01	0.01	0	0.09	0	0.02	0	0	0	0.08	0.05	0.03	0	0.04	0	0.05	0.02	0	0.03	0	0.03	0.02	0	0.03	0	0.02
XLOC_000916	0	0	0.07	0	0.05	0.08	0.04	0	0	0.05	0.15	0.32	0.08	0.03	0	0.13	0.25	0.17	0.57	0.41	0.34	0.34	0.11	0.32	0.16	0.18	0	0.1	0	0.11	0.1	0.17	0.1	0.24	0.31	0	0.24	0.1	0.05	0.11	0.21	0.18	0.05	0	0.25	0.06	0	0.13	0.05
XLOC_000917	1.95	1.49	2.49	1.01	1.3	1.7	1.75	1.77	1.29	0.98	1.67	0.62	0.91	1.1	1.2	1.18	0.88	0.64	1.26	0.62	0.53	1.14	1.14	0.89	1.08	0.66	1.83	0.63	0.75	1.23	1.08	1.35	1.67	1.18	1.72	0.5	0.9	1.41	1.31	1.27	1.22	1.12	2.14	1	1.1	1.34	1.2	1.47	1.1
XLOC_000918	0	0	0	0	0	0	0.03	0	0.06	0	0.05	0.02	0.04	0	0	0	0.04	0.24	0.24	0.21	0.27	0.1	0.06	0.05	0.14	0.04	0.12	0.04	0.19	0.08	0.04	0.02	0.07	0.07	0.06	0	0	0.11	0	0.04	0.1	0.21	0.48	0.56	0.35	0.4	0.31	0.11	0
XLOC_000919	1.45	2	0.68	1.06	0.99	1.03	1.34	1.96	1.71	2.19	1.49	1.99	2.73	1.63	2.69	2.29	1.61	2.06	1.5	1.83	2.35	1.59	2.8	2.24	1.51	1.99	1.65	1.39	1.98	1.2	2.21	1.8	0.95	1.65	1.22	1.38	2.06	1.57	2.83	1.98	1.21	1.74	1.95	2.3	1.91	1.39	2.84	1.96	1.26
XLOC_000920	0.19	0.13	0.07	0.25	0.2	0.35	0.19	0.13	0.44	0.72	0.38	0.35	0.23	0.26	0.16	0.18	0.36	0.63	0.38	0.75	0.59	0.18	0.35	0.14	0.27	0.68	0.23	0.44	0.26	0.29	0.18	0.17	0.4	0.3	0.35	0.6	0.27	0.72	0.22	0.13	0.27	0.43	0.27	0.37	0.48	0.53	0.16	0.29	0.57
XLOC_000921	0.53	0.23	0.18	0.22	0.17	0.31	0.15	0.47	1.26	0.72	0.97	0.56	0.45	0.44	0.23	0.89	1.08	0.72	0.4	0.05	0.25	0.27	0.49	0.67	0.85	0.4	0.33	0.26	0.33	0.3	0.26	0.48	0.89	0.62	1.15	0.79	0.26	1.45	0.45	1.58	0.99	0.49	0.27	0.27	0.45	0.3	0.13	0.51	0.57
XLOC_000922	1.29	0.78	1.12	0.99	0.92	0.53	0.39	0.69	0.13	0.18	0.14	0.09	0.08	0.04	0.08	0.09	0.33	0.18	0.26	0.21	0.24	0.18	0.27	0.17	0.19	0.24	0.23	0.25	0.43	0.28	0.27	0.25	0.16	0.14	0.17	0.07	0.14	0.14	0.07	0.18	0.21	0.15	0.21	0.23	0.52	0.08	0.18	0.2	0.16
XLOC_000923	0.06	0.03	0.03	0.05	0	0	0	0.02	0.34	0.26	0.35	0.11	0.16	0.33	0.06	0.12	0.21	0.56	0.41	0.26	0.33	0.54	0.7	0.43	0.05	0.22	0.3	0.39	0.23	0.35	0.1	0.22	0.17	0.18	0.25	0.04	0.16	0.32	0.07	0.22	0.13	0.11	0.15	0.1	0.02	0.25	0.07	0.07	0.22
XLOC_000924	0.31	0.31	0.34	0.25	0.39	0.31	0.32	0.26	0.75	0.75	1.01	1.11	0.87	0.79	0.4	0.65	0.86	0.74	0.4	0.68	0.74	0.63	0.75	0.63	0.55	0.61	0.78	0.6	0.38	0.71	0.58	0.52	0.67	0.46	0.68	0.5	0.57	0.5	0.81	0.45	0.42	0.27	0.53	0.52	0.33	0.34	0.3	0.22	0.57
XLOC_000925	0.15	0.05	0.12	0	0	0	0.03	0	0.05	0.14	0.1	0.24	0.26	0.54	0.64	0.31	0.1	0.03	0	0.04	0	0	0.06	0	0.16	0	0	0.06	0	0	0	0	0.12	0.05	0.05	0.36	0.16	0.09	0.19	0.25	0	0	0	0.02	0	0	0.07	0	0.08
XLOC_000926	0.19	0.24	0.38	0.22	0.1	0.12	0.22	0.23	0.74	0.79	0.72	0.77	0.26	0.52	0.41	0.46	0.44	0.19	0.46	0.67	0.21	0.28	0.38	0.46	0.69	0.61	0.4	0.59	0.34	0.42	0.37	0.37	0.76	0.69	0.59	0.61	0.1	0.4	0.65	0.18	0.84	0.67	0.79	0.65	0.13	0.5	0.62	0.66	0.97
XLOC_000927	0	0.01	0.02	0	0	0.02	0	0	0.26	0.24	0.42	0.13	0.43	0.42	0.46	0.36	0.14	0.09	0.11	0	0	0.03	0.04	0.02	0.01	0.16	0.19	0.09	0	0.08	0.12	0.05	0	0.04	0.14	0.1	0.17	0.11	0.36	0.22	0	0	0	0	0	0	0	0.04	0.09
XLOC_000928	0.33	0.14	0.35	0.1	0.32	0.33	0.21	0.31	0.03	0.15	0.04	0.08	0.03	0.04	0	0.1	0.12	0.11	0.1	0	0.05	0.49	0	0.2	0.06	0.15	0.21	0.13	0.17	0.24	0.05	0.09	0.02	0	0.05	0	0	0.11	0.03	0	0.04	0.24	0.28	0.23	0.29	0.24	0.17	0.02	0.11
XLOC_000929	0	0	0	0	0	0.07	0.08	0.08	0	0	0	0	0.28	0.29	0.14	0	0	0.3	0.13	0	0.15	0.05	0.1	0.07	0.21	0.09	0	0.04	0.21	0.1	0.05	0.05	0.18	0.16	0.08	0	0.04	0.13	0	0	0.21	0.02	0.07	0.09	0.2	0.2	0.66	0.26	0
XLOC_000930	0	0	0	0	0	0	0	0	0	0	0	0.04	0.12	0.08	0.12	0	0	0	0	0	0.07	0	0	0.06	0	0.04	0	0.15	0	0.27	0.12	0	0	0	0	0	0.06	0.08	0	0	0.04	0.12	0.46	0.11	0	0.31	0.1	0	0
XLOC_000931	0	0.07	0	0	0	0	0	0	0.13	0.19	0.18	0.04	0.69	0.52	0.51	0.46	0.3	0.14	0.28	0.05	0.71	0.69	1.07	1.14	0.01	0.21	0.26	0.1	0.4	0.29	0.58	0.32	0	0.15	0.07	0.07	0.56	0.26	0.82	0.7	0	0	0	0.02	0.01	0.02	0.12	0.07	0.21
XLOC_000932	0	0	0	0	0	0	0	0	0	0	0.03	0	0	0	0	0	0.05	0.07	0.44	0.03	0	0	0	0	0.04	0.33	0.06	0	0	0	0.14	0.06	0.17	0.39	0.03	0	0	0	0	0.15	0	0	0	0	0	0	0	0	0.15
XLOC_000933	0.25	0.28	0.27	0.23	0.37	0.32	0.04	0.37	0.41	0.3	0.28	0.39	0.18	0.3	0.27	0.29	0.38	0.44	0.04	0.16	0.45	0.25	0.16	0.14	0.67	0.02	0.47	0.09	0.23	0.27	0.58	0	0.24	0.25	0.46	0.16	0.32	0.21	0.1	0.09	0.75	0.14	0.28	0.02	0.07	0.27	0.37	0	0.33
XLOC_000934	0	0	0.03	0	0.41	0	0	0.1	0.04	0	0	0	0.06	0	0	0.02	0	0	0	0.04	0.03	0	0	0	0.02	0	0	0	0.09	0	0	0	0	0.03	0	0.04	0.13	0	0	0	0	0.02	0	0.04	0	0	0	0	0
XLOC_000935	0.31	0.58	0.39	0.43	0.61	0.54	0.36	0.69	0.23	0.45	0.61	0.21	0.04	0.26	0.56	0.04	0.54	0.39	0.24	0.38	0.42	1.32	0.49	0.27	0.3	0	0.26	0.57	0.34	1.25	0.42	0.05	0.22	0.29	0.22	0.3	0.27	1.21	0.36	0.26	0.69	0.51	0.44	0.31	1.1	0.61	0.58	0.16	0.44
XLOC_000936	2.97	3.34	3.47	2.63	1.54	1.94	2.4	2.54	2.8	3.4	2.96	3.34	3.35	3.51	3.8	3.99	2.5	2.72	2.27	2.27	1.37	1.85	1.69	2.35	2.81	3.6	2.37	2.45	1.24	1.94	1.34	2.2	3.97	3.79	2.52	2.8	1.57	2.24	2.43	2.19	2.92	3.01	2.6	2.13	1.69	1.78	2.04	2.11	2.59
XLOC_000937	0	0	0	0	0	0	0	0	0	0	0	0	0	0	0	0	0	0	0	0	0	0	0	0	0	0	0	0	0	0	0	0	0	0	0	0	0	0	0	0	0	0	0	0	0	0	0	0	0
XLOC_000938	0	0	0	0	0.06	0.06	0	0	0.07	0	0.07	0.12	0.12	0.07	0.09	0.07	0.34	0.27	0.13	0.03	0.32	0.12	0.13	0.08	0.13	0.3	0.13	0.07	0.24	0.04	0.09	0.12	0.25	0.31	0	0.12	0.05	0.43	0	0	0.04	0.16	0.25	0.23	0.23	0.13	0.04	0.41	0.22
XLOC_000939	0.95	1.4	0.7	1.08	1.62	1.49	1.44	1.44	1.2	0.93	1.04	1.08	0.9	1.27	0.57	1.39	1.33	1.25	1.29	1.19	0.95	1.43	1.33	1.22	1.06	1.12	1.42	0.87	0.39	1.22	0.98	1.47	1.05	1.02	0.75	0.95	1.05	1.57	0.84	1.24	1.51	0.98	1.59	1.4	1.09	1.25	1.1	1.24	1.55
XLOC_000940	2.22	2.16	1.37	2.12	1.64	1.88	2.5	1.86	0.96	1.06	1.21	1.46	1.03	0.92	0.62	1.39	1.35	1.25	2.24	1.66	0.95	1.94	2.41	1.8	1.05	0.79	1.37	1.7	1.41	2.06	1.02	1.19	0.98	0.78	1.24	0.91	0.97	1.57	0.99	1.97	0.51	0.7	1.2	1.23	0.64	0.84	1.11	1.08	1.45
XLOC_000941	0.08	0.31	0.16	0.56	0.31	0.34	0.31	0.15	1.92	1.4	2.18	1.54	1.3	0.91	1.09	1	3.24	1.55	3.21	2.49	1.88	2.16	2.82	2.39	4.06	2.27	2.25	2.03	2.15	2.16	3.8	1.77	1.63	1.43	1.14	1.83	1.34	1.61	1.74	1.15	2.45	1.81	1.62	1.25	1.59	2.04	1.48	1.39	3.4
XLOC_000942	0.78	0.91	0.77	0.66	0.5	1.31	0.9	0.83	0.23	0.32	0.39	0.14	0.19	0.34	0.08	0.21	0.27	0.19	0.19	0.32	0.19	0.3	0.34	0.16	0.42	0.04	0.08	0.18	0.11	0.28	0.11	0.44	0.13	0.27	0.21	0.14	0.12	0.25	0.33	0.25	0.6	0.49	0.6	0.23	0	0.43	1.01	0.37	0.25
XLOC_000943	0.28	0.27	0.16	0.17	0.03	0.13	0	0.75	0.09	0.03	0.15	0.05	0.03	0.04	0	0.07	0.1	0.13	0.03	0.15	0.25	0.04	0.02	0.13	0.07	0.17	0.26	0.08	0	0.07	0.02	0	0.05	0.09	0.06	0.03	0.05	0	0.04	0.14	0.12	0.05	0.1	0.17	0	0.08	0.02	0.04	0.18
XLOC_000944	5.64	6.06	3.91	5.45	5.47	6.65	5.12	5.45	7.02	5.67	5.83	6.88	9.68	12.26	7.76	7.95	4.44	5.89	3.26	4.17	4.7	5.98	5.88	6.66	3.98	5.55	4.22	4.13	3.33	4.75	3.94	4.02	6.08	7.26	4.58	5.73	4.15	8.33	7.07	4.6	3.08	3.51	2.37	2.76	2.73	2.5	2.74	2.76	3.93
XLOC_000945	0.16	0.14	0.09	0.27	0.15	0.31	0.36	0.34	0.17	0.14	0.09	0.03	0.2	0.1	0.13	0.15	0.04	0.06	0.08	0.15	0.21	0.41	0.1	0.36	0	0.19	0.04	0.16	0.06	0.19	0.43	0.25	0.09	0.35	0.24	0.08	0.49	0.56	0.09	0.09	0.06	0.37	0.83	0.31	0.25	0.37	0.09	0.39	0.06
XLOC_000946	0.97	0.61	0.66	1.3	0.86	1.1	0.75	1.22	0.86	1.12	0.92	1.11	1.12	0.59	0.67	1.26	0.88	0.92	1.23	0.89	0.95	0.82	0.74	1.29	0.39	0.53	0.49	0.37	0.6	0.7	0.81	0.61	0.27	0.69	0.61	0.8	0.77	0.6	0.56	0.59	0.61	0.68	0.75	0.92	0.72	0.71	0.86	1.2	0.61
XLOC_000947	2.26	2.46	1.66	3.08	4.05	4.01	3.8	3.59	0.39	0.81	0.67	0.68	1.04	0.95	0.77	0.88	0.84	0.64	0.74	0.87	1.26	1.45	1.01	0.91	0.48	0.48	0.46	0.72	1	1.2	1.45	0.93	0.62	0.53	0.71	0.82	0.81	0.88	0.91	0.58	0.74	0.97	0.7	0.83	1.43	1.13	1.25	0.96	0.77
XLOC_000948	1.09	1.25	1.13	2.77	1.35	1.97	1.96	2.06	0.58	0.45	1.45	1.71	3.05	5.33	2.26	2.03	0.37	0.24	0.1	0.46	0.73	0.75	0.49	0.37	0.24	0.39	0.37	1.41	0.41	0.85	0.13	0.35	0.24	0.46	0.49	0.74	0.98	1.28	0.55	0.75	0.99	0.94	0.8	1.44	1.12	0.69	1.06	0.19	0.32
XLOC_000949	1.06	0.79	0.9	2	1.15	2.02	1.07	1.1	0.8	0.4	1.49	2.79	3.38	5.2	1.48	2.12	0.23	0.38	0.08	1.43	0.96	0.46	0.39	0.26	0.21	0.12	0.04	0.98	0.68	0.49	0.14	0.18	0.33	0.47	0.49	0.81	0.49	1.52	0.96	0.26	0.19	0.83	0.02	1.58	1.12	0.91	0.36	0.26	1.11
XLOC_000950	0.41	1.75	1.74	2.82	3.21	1.77	1.45	3.11	0.01	0.08	0.07	0.3	0.17	0.11	0.16	0.27	0.01	0.05	0.08	0.15	0.22	0.09	0.15	0.29	0	0.09	0.35	0.2	0.2	0.12	0.17	0.33	0	0.07	0.11	0.1	0.04	0.12	0.06	0.16	0.06	0.08	0.19	0.48	0.57	0.26	0.33	0.53	0.07
XLOC_000951	0	0	0	0	0	0	0	0	0	0	0	0	0	0	0	0	0	0	0	0	0	0	0	0	0	0	0	0	0	0	0	0	0	0	0	0	0	0	0	0	0	0	0	0	0	0	0	0	0
XLOC_000952	0.11	0.15	0	0.22	0.16	0.14	0.1	0.39	0.29	0.73	0.4	0.18	0.45	0.13	0.37	0.13	0.04	0.28	0.17	0	0.1	0.2	0.4	0.09	0	0.09	0.09	0.09	0	0.13	0.09	0.17	0.12	0.12	0.36	0.27	0	0.57	0.13	0.12	0.15	0.21	0.15	0.08	0.07	0.07	0.23	0.08	0.06
XLOC_000953	0.42	0.28	0.37	0.77	0.19	0.7	0.18	0.92	0.3	0.1	0.27	0.38	0.26	0.24	0	0.36	0.32	0.12	0.43	0.35	0.35	0.51	0.08	0.19	0.4	0.18	0.16	0.22	0.28	0.35	0.07	0.2	0.14	0.29	0.15	0.6	0.19	0.5	0	0.36	0.16	0.23	0.42	0.39	0.52	0.31	0	0.31	0.26
XLOC_000954	0	0	0	0	0	0	0	0	0	0	0	0	0	0	0	0	0	0	0	0	0	0	0	0	0	0	0	0	0	0	0	0	0	0	0	0	0	0	0	0	0	0	0	0	0	0	0	0	0
XLOC_000955	0.05	0.22	0.07	0	0.28	0.12	0.09	0.08	0	0.02	0	0.07	0.13	0.05	0.08	0	0	0	0.1	0.46	0.09	0.06	0	0	0	0	0	0.05	0	0	0	0	0.07	0.07	0.09	0	0	0.29	0	0	0.13	0	0	0.1	0	0.06	0	0.1	0
XLOC_000956	0	0.25	0.12	0.24	0.2	0.06	0.06	0.06	0.12	0.11	0	0.09	0.11	0.04	0.28	0.04	0	0.07	0.03	0	0	0	0.13	0	0.08	0.13	0	0	0	0.42	0.07	0	0.19	0	0.03	0.2	0	0	0.08	0	0.11	0.09	0	0.05	0.2	0.2	0	0	0
XLOC_000957	0	0	0.08	0.06	0.21	0.07	0.05	0.02	0.06	0.03	0.24	0.11	0.04	0.12	0.19	0.17	0.02	0.33	0	0.05	0	0.13	0.09	0.09	0.02	0.13	0.08	0.07	0	0.14	0.06	0.07	0.06	0.04	0.23	0.03	0.02	0.06	0	0.12	0.01	0.04	0	0	0.03	0.03	0.09	0.07	0.03
XLOC_000958	6.09	6.18	6.66	5.65	6.36	5.92	5.93	6.1	3.61	3.47	4.15	3.72	3.58	3.67	2.94	3.44	2.93	2.98	3.33	3.29	2.82	3.23	3.03	2.84	2.93	2.4	3.31	2.89	3.56	2.53	3.29	3.14	2.52	2.84	2.89	2.33	2.65	1.78	2.43	2.19	2.88	3.48	4.11	3.65	3.26	3.13	3.07	3.64	2.93
XLOC_000959	0.33	0.6	0.43	0.59	0.03	0.44	0.65	0.45	0	0	0.02	0	0	0	0.08	0.02	0	0	0.06	0.06	0.19	0.07	0.02	0	0	0	0	0	0.07	0	0	0.04	0	0	0	0	0	0	0	0	0	0	0	0	0	0	0	0	0
XLOC_000960	0	0	0.05	0	0	0	0.06	0	0.04	0.17	0.1	0.03	0.21	0.11	0.37	0.08	0	0	0.13	0.06	0	0.08	0	0.17	0	0	0.15	0.07	0	0	0	0	0	0	0.06	0.06	0	0	0	0	0	0.11	0.07	0.6	0	0.44	0.18	0.18	0
XLOC_000961	0	0	0	0	0	0.13	0	0	0	0	0.22	0.02	0.21	0.37	0.6	0	0.03	0.08	0.16	0.04	0	0	0	0.1	0	0.23	0.07	0.02	0.07	0.21	0.17	0	0	0.06	0.22	0.11	0	0.08	0	0	0.04	0.25	0.3	0.22	0.09	0.42	0.18	0.08	0
XLOC_000962	0	0.02	0	0.07	0	0.03	0	0.05	0.16	0.08	0.17	0.34	0.21	0.31	0.19	0.02	0.09	0.2	0.15	0.24	0.3	0.11	0.19	0.26	0.2	0	0.02	0.05	0.08	0.25	0.31	0.24	0.04	0	0.17	0.03	0.05	0	0.07	0.14	0.13	0.45	0.2	0.37	0.41	0.13	0.08	0.25	0.27
XLOC_000963	1.18	1.71	2.11	0.97	1.6	1.09	1.2	1.55	0.81	1.22	2.01	1.12	1.28	0.97	0.79	1.02	0.82	0.64	1.32	0.68	0.96	1.44	1.4	0.84	0.62	0.45	1.58	0.81	0.71	0.71	0.61	0.63	0.83	0.94	1.53	0.44	1.19	0.97	1.7	1.8	1.08	1.12	2.31	1.07	1.91	0.76	2.19	1.3	0.6
XLOC_000964	0	0	0.67	0.05	0.14	0.18	0.13	0.33	0.08	0.13	0.13	0.07	0.02	0.1	0.11	0.06	0	0	0	0	0.12	0	0	0.24	0	0.06	0.23	0	0.28	0.08	0	0.04	0	0.15	0.29	0.03	0.27	0.28	0.04	0	0	0.06	0.19	0.07	0	0.06	0	0	0
XLOC_000965	0	0	0	0	0	0	0	0	0	0	0	0	0	0	0	0	0	0	0	0	0	0	0	0	0	0	0	0	0	0	0	0	0	0	0	0	0	0	0	0	0	0	0	0	0	0	0	0	0
XLOC_000966	2.31	2.12	1.85	2.96	3.51	1.92	2.4	2.08	0.97	0.43	0.97	1.31	1.6	1.87	1.3	0.4	0.87	0.81	0.62	0.25	0.83	0.9	0.52	0.89	1.41	1.22	0.98	0.14	0.43	1.01	0.23	0.67	2.05	2.32	1.38	0.55	0.71	1.49	1.26	1.52	1.34	1.45	1.54	0.97	1.03	1.31	0.62	1.27	1.42
XLOC_000967	0.08	0.11	0	0	0.08	0.21	0.15	0	0	0	0.08	0.13	0	0.04	0	0.09	0.18	0	0	0	0	0	0	0	0	0	0	0	0	0	0	0.39	0	0.06	0	0.85	0	0	0	0	0	0	0	0	0	0	0	0	0
XLOC_000968	0.09	0.07	0.23	0.1	0.17	0.2	0.14	0.17	0.16	0.17	0.25	0.15	0.12	0.25	0.15	0.08	0.3	0.25	0.31	0.24	0.33	0.06	0.42	0.25	0.3	0.1	0.48	0.24	0.28	0.26	0.59	0.19	0.16	0.12	0.45	0.22	0.3	0.34	0.32	0.21	0.19	0.18	0.41	0.4	0.37	0.3	0.62	0.28	0.28
XLOC_000969	9.83	5.38	8.74	10.57	17.41	17.99	17.43	13.96	19.06	17.96	18.68	17.21	29.23	26.58	20.22	24.12	28.49	45.12	22.3	31.14	25.36	29.37	22.8	30.16	34.74	32.88	32.97	24.64	20.72	27.88	15.21	28.54	33.7	36.63	19.13	14.73	10.35	20.28	22.2	12.04	50.45	66.53	49.07	55.35	46.99	45.76	46.09	53.69	34.95
XLOC_000970	0.06	0.04	0.12	0	0.02	0	0.04	0	0.1	0.04	0.06	0.01	0.1	0.14	0.05	0	0.03	0.12	0.02	0.02	0.07	0.07	0.25	0.11	0.17	0.15	0.03	0.04	0.14	0.09	0.04	0.03	0.13	0.03	0.04	0.08	0.14	0.09	0.14	0	0.02	0.1	0	0.09	0.01	0.2	0.08	0	0
XLOC_000971	0.28	0.13	0.3	0.32	0.26	0.18	0.19	0.13	0.3	0.11	0.19	0.36	0.34	0.41	0.34	0.19	0.48	0.51	0.34	0.41	0.37	0.37	0.43	0.17	0.74	0.65	0.12	0.79	0.32	0.59	0.29	0.19	1.07	0.35	0.38	0.31	0.23	0.3	0.37	0.2	0.73	0.13	0.28	0.18	0.39	0.22	0.56	0.16	0.79
XLOC_000972	0.04	0	0.05	0.03	0.02	0	0.03	0	0.12	0.02	0.03	0.1	0.1	0.08	0.07	0.04	0.23	0.34	0.02	0.11	0.15	0.25	0.07	0.02	0.3	0.09	0.02	0.02	0.13	0	0	0	0.12	0.11	0	0	0.14	0.02	0.15	0	0.02	0.14	0	0.09	0.04	0.06	0	0	0.1
XLOC_000973	0	0	0	0	0	0	0	0	0	0	0	0.04	0	0	0	0	0	0	0	0.08	0	0	0	0	0	0.22	0	0	0	0	0	0	0	0	0	1.02	0	0	0	0	0	0	0	0	0	0	0	0	0
XLOC_000974	0	0	0.01	0	0	0.01	0	0.03	0	0	0.01	0	0	0.01	0.01	0	0.43	0.49	0.41	0.45	0.54	0.25	0.24	0.17	0.65	0.88	0.69	0.7	0.43	0.26	0.33	0.2	0.22	0.21	0.25	0.05	0.3	0.18	0.24	0.11	0.98	0.67	0.39	0.23	0.35	0.37	0.28	0.26	0.56
XLOC_000975	1.58	1.94	2.15	2.24	2.21	2.14	2.1	2.7	0.8	1.03	1.1	1.23	1.67	1.42	1.47	1.39	0.81	1.24	0.85	1.09	1.16	1.03	1.2	1.28	1.08	1.16	1.45	1.15	0.82	1.23	0.74	1.21	1.37	1.59	1.12	1.15	0.76	1.33	1.23	0.86	0.93	1.3	1.14	1.41	1.22	1.35	1.4	1.61	0.82
XLOC_000976	0.34	0.18	0.26	0.36	0.39	0.12	0.19	0.3	0.15	0.03	0.06	0.11	0.27	0.15	0.1	0.09	0.08	0.09	0.03	0.01	0.17	0.03	0.16	0.12	0.14	0.05	0.03	0.07	0.1	0.09	0	0.05	0.15	0.11	0.06	0.11	0.07	0.25	0.05	0.11	0.15	0.1	0.14	0.21	0.13	0.08	0.07	0.16	0.05
XLOC_000977	0.19	0.15	0.22	0.22	0.23	0.08	0.03	0.08	0.19	0.18	0.17	0.2	0.09	0.29	0.14	0.15	0.05	0.18	0.07	0.14	0.13	0.04	0.25	0.19	0.11	0.16	0.12	0.18	0.34	0.07	0.08	0.14	0.06	0.1	0.32	0.65	0.2	0.54	0.19	0.32	0.24	0.1	0.08	0.15	0.17	0.05	0.08	0.16	0.03
XLOC_000978	2.09	2.38	1.34	2.38	1.94	2.65	1.58	2.26	0.67	0.3	0.36	0.32	0.43	0.52	0.56	0.4	0.53	0.44	0.38	0.53	0.66	0.45	0.56	0.51	0.46	0.25	0.89	0.46	0.4	0.5	0.37	0.26	0.24	0.44	0.38	0.35	0.37	0.64	0.28	0.36	0.74	0.42	0.41	0.41	0.79	0.77	0.47	0.91	0.23
XLOC_000979	1.43	1.97	1.53	1.01	1.36	0.98	2.81	1.7	0.35	0.21	0.15	0.29	0.24	0.14	0.22	0.03	0.34	0.39	0.25	0.19	0.18	0.12	0.39	0.25	0.11	0.03	0.33	0.15	0.46	0.44	0.21	0.45	0.32	0.47	0.51	0.48	0.55	0.2	0.46	0.72	0.35	0.35	0.3	0.47	0.38	0.48	0.87	0.74	0.17
XLOC_000980	1.51	1.13	0.97	1.89	1.1	1.58	3.29	2.04	0.79	0.42	0.99	0.55	1.08	0.85	0.57	1.11	1.17	0.62	0.72	0.54	1.15	0.97	1.2	1.7	1.12	0.87	2.06	0.66	0.25	0.62	0.38	0.49	0.63	2	0.97	0.93	1.64	2.06	1.2	0.54	1.62	1.57	1.03	0.68	0.57	1.34	1.35	1.19	1.08
XLOC_000981	0.07	0	0	0	0	0	0	0	0	0.08	0	0	0	0	0	0	0	0	0	0.07	0	0	0	0	0	0	0	0	0	0	0	0.53	0	0	0	0	0.06	0	0	0	0.32	0	0	0	0	0	0	0	0.08
XLOC_000982	0.8	0.5	1.03	0.95	0.62	0.79	1.21	0.41	0.3	0.3	0.48	0.15	0.25	0.39	0.51	0.56	0.53	0.37	0.35	0.17	0.21	0.35	0.32	0.15	0.39	0.44	0.55	0.09	0.54	1.16	0.52	0.42	0.62	0.25	0.54	0.5	0.44	0.24	0.2	0.58	0.44	0.44	0.74	0.52	0.92	0.41	1.28	0.5	0.13
XLOC_000983	0	0	0	0	0	0	0	0	0	0	0	0	0	0	0	0	0	0	0	0	0	0	0	0	0	0	0	0	0	0	0	0	0	0	0	0	0	0	0	0	0	0	0	0	0	0	0	0	0
XLOC_000984	0.18	0.36	0.9	0.48	0.2	0.49	0.28	0.23	0.52	0.09	0.17	0.59	0.08	0.17	0.44	0.25	0.18	0.05	0.31	0.22	0.07	0.12	0.14	0.28	0.17	0.2	0.6	0.16	0.32	0.15	0.23	0.41	0.09	0.15	0.33	0.27	0.02	0.11	0.38	0.49	0.11	0	0.21	0.09	0.06	0.22	0.26	0.35	0.23
XLOC_000985	0.54	0.56	0.47	0.69	0.57	0.41	0.68	0.26	0.2	0.33	0.12	0.1	0.33	0.33	0.3	0.14	0.03	0.26	0.25	0.09	0.24	0.14	0.43	0.15	0.24	0.16	0.29	0.3	0.22	0.03	0.3	0.28	0.16	0.08	0.21	0.33	0.39	0.16	0.18	0.33	0.16	0.27	0.49	0.19	0.12	0.54	0.47	0.41	0.2
XLOC_000986	0.2	0.31	0.45	0.25	0.42	0.21	0.36	0.32	1.14	1.67	2.12	1.05	1.73	1.36	1.12	1.49	2.24	2.28	2.38	1.71	2.38	1.86	2.23	1.63	1.18	1.9	1.9	1.86	2.43	1.38	1.93	2.63	1.11	1.46	1.33	0.72	1.34	1.1	1.27	1.2	1.19	1.44	1.36	1.2	1.27	0.85	2.01	1.2	1.5
XLOC_000987	0	0	0.1	0	0	0	0	0	0.08	0	0.04	0	0.26	0.23	0	0.04	0	0	0	0	0.06	0.25	0.05	0.29	0	0.04	0.15	0	0.04	0	0	0	0	0	0	0	0	0.07	0.24	0	0	0.15	0	0	0.36	0	0	0.05	0.15
XLOC_000988	0.02	0.02	0.03	0.04	0.05	0	0	0.02	0.21	0.27	0.33	0.54	1.05	0.64	0.33	0.39	0.43	0.51	0.41	0.52	0.35	0.42	0.46	0.3	0.25	0.25	0.2	0.27	0.08	0.23	0.14	0.14	0.26	0.3	0.08	0.41	0.36	0.08	0.17	0.06	0.47	0.51	0.29	0.38	0.28	0.15	0.47	0.17	0.26
XLOC_000989	0.04	0.14	0.1	0.11	0.11	0.08	0.18	0.12	0.03	0.24	0.17	0.09	0.24	0.16	0.15	0.46	0.13	0.19	0.05	0.19	0.2	0.24	0.18	0.28	0.11	0.1	0.37	0.09	0.08	0.37	0.01	0.08	0.07	0.07	0.23	0.06	0.11	0.28	0.19	0.11	0.06	0.12	0.07	0.04	0.23	0.08	0.1	0.06	0.08
XLOC_000990	1.89	2.22	1.64	1.69	2.21	2.07	1.91	2.05	0.53	0.44	0.69	0.55	0.64	0.7	0.74	0.58	0.66	0.88	0.75	0.64	0.5	0.71	0.59	0.51	0.7	0.92	0.48	0.66	0.67	0.62	0.76	0.82	1.04	0.98	0.65	0.59	0.46	0.47	0.42	0.36	1.45	1.23	1.15	1.45	1.41	1.18	0.74	1.1	0.93
XLOC_000991	3.15	4.02	3.1	3.87	3.53	5.22	3.58	4.01	1.33	1.55	1.27	1.23	1.45	1.85	1.55	1.32	1.88	2.51	1.47	2.11	1.97	1.9	2.03	2.11	2.26	1.96	2.11	1.4	1.44	1.85	1.69	2.14	1.92	2.32	1.26	1.48	0.77	1.69	1.38	0.95	2.88	3.21	2.79	3.15	2.87	2.56	2.41	2.55	1.94
XLOC_000992	2.1	1.49	2.05	1.82	1.93	1.93	1.99	1.36	0.65	0.46	0.57	0.71	0.77	0.66	0.49	0.64	0.95	0.72	0.87	0.77	0.73	0.76	0.79	0.64	1.11	0.87	0.8	0.78	0.69	0.67	0.72	0.45	0.63	0.38	0.42	0.52	0.52	0.43	0.31	0.33	1.1	0.83	0.59	0.84	0.65	0.79	0.89	0.92	0.76
XLOC_000993	0.7	0.46	0.25	0.63	0.84	0.43	0.43	0.42	0	0	0	0.02	0	0	0.03	0	0	0	0	0	0	0	0	0	0	0	0	0	0	0	0	0	0	0	0	0	0	0	0.07	0	0	0	0	0	0	0	0	0	0
XLOC_000994	0.05	0.16	0.17	0.21	0.74	0.18	0.02	0.21	0.06	0.03	0	0.01	0.07	0.04	0	0.03	0.16	0.09	0.11	0.1	0.31	0	0.25	0.07	0	0	0	0.04	0.02	0.06	0.03	0.21	0	0.27	0.2	0.05	0.09	0	0	0	0.06	0.13	0.18	0.16	0.96	0.17	0.27	0.11	0.18
XLOC_000995	0.28	0.33	0.35	0.51	0.04	0.21	0.22	0.4	0.02	0.11	0.02	0.06	0.15	0.18	0.13	0.26	0.06	0.06	0.41	0	0	0	0.13	0.03	0	0.13	0	0.06	0	0	0	0	0.03	0	0	0	0	0	0	0	0	0	0	0	0	0	0	0.06	0
XLOC_000996	3.7	2.15	3.5	3.78	4.42	5.93	3.38	5.29	6.11	6.03	11.71	7.24	6.8	10.18	8.55	10.48	4.62	5.24	6.74	6.11	5.68	8.31	5.3	7.75	5.35	4.22	7.29	5.33	5.63	9.73	6.8	9.45	12.17	12.64	26.21	17.02	12.65	33.45	13.16	20.82	6.36	6.34	7.8	8.92	7.08	8.73	9.24	9.57	5.44
XLOC_000997	0.15	0.11	0.06	0.11	0.07	0.27	0.05	0.13	0.53	0.3	0.63	0.52	0.59	0.53	0.31	0.39	0.42	0.29	0.37	0.3	0.42	0.25	0.2	0.43	0.33	0.28	0.37	0.3	0.6	0.46	0.16	0.46	0.52	0.53	0.44	0.59	0.38	0.47	0.24	0.28	0.29	0.36	0.37	0.71	0.5	0.49	0.44	0.89	0.22
XLOC_000998	0	0.25	0.16	0.06	0.21	0.19	0.13	0.32	0.13	0	0	0.15	0.43	0.12	0.44	0.3	0.17	0.21	0	0.21	0.13	0.27	0.58	0.06	0.04	0.16	0.04	0.08	0.64	0.04	0.35	0.18	0.32	0.22	0.14	0.21	0	0.15	0	0.08	0	0.04	0.33	0.15	0.09	0.26	0.64	0.49	0.08
XLOC_000999	0	0.08	0.02	0	0.03	0	0.09	0.11	0	0	0.26	0.07	0.07	0.1	0.07	0.11	0.14	0.02	0.06	0.09	0.22	0.04	0.12	0.08	0.02	0.27	0.23	0.03	0	0.02	0	0.19	0.07	0	0	0	0	0	0	0.31	0.03	0	0.1	0.02	0.15	0.04	0.27	0.04	0.21
XLOC_001000	0.1	0.13	0.1	0.15	0	0	0.18	0.21	0	0.1	0.33	0.05	0.08	0.14	0.11	0.17	0.07	0.03	0.15	0.28	0.26	0.18	0.04	0.21	0	0	0	0.4	0.09	0.32	0.23	0.03	0	0.11	0.18	0.14	0.17	0	0	0	0	0.03	0.51	0	0.17	0	0.03	0.13	0
XLOC_001001	2.21	2.88	1.71	2.66	2.83	2.48	3.48	2.14	1.57	1.79	1.59	1.49	1.38	1.1	1.32	1.62	1.23	1.57	1.35	1.22	1.45	1.48	1.93	2.07	1.08	1.14	0.82	1.01	1.05	1.08	1.34	1.59	1.18	1.03	1.07	0.79	1.08	1.24	1.55	1.87	1.1	1.35	1.09	1.17	1.39	1.26	1.48	1.57	1.15
XLOC_001002	0.86	1.23	0.75	0.98	1.42	1.03	0.83	0.86	0.22	0.2	0.39	0.19	0.42	0.19	0.29	0.18	0.13	0.11	0.23	0.1	0.26	0.21	0.16	0.11	0.12	0.04	0.13	0.15	0.31	0.25	0.19	0.02	0.16	0.27	0.22	0.23	0.34	0.48	0.27	0.25	0.19	0.2	0.12	0.24	0.21	0.15	0.21	0.22	0.09
XLOC_001003	1.4	1.28	1.62	1.14	0.95	2.74	1.29	1.45	0.27	0.35	0.29	0.38	0.3	0.53	0.36	0.35	0.24	0.23	0.17	0.28	0.3	0.39	0.22	0.25	0.22	0.19	0.41	0.08	0.1	0.21	0.1	0.33	0.3	0.3	0.23	0.17	0.19	0.53	0.29	0.2	0.23	0.27	0.21	0.32	0.35	0.64	0.28	0.37	0.35
XLOC_001004	0.57	0.81	0.83	0.53	0.33	0.7	0.62	0.55	0.11	0.23	0.25	0.51	0.49	0.32	0.42	0.55	0.22	0.31	0.58	0.23	0.09	0.23	0.42	0.41	0.48	0.32	0.08	0	0.36	0.4	0.28	0.03	0.48	0.57	0.04	0.51	0.54	0.05	0.39	0.11	0.18	0.47	0.8	0.14	0.62	0.14	0.62	0.06	0.59
XLOC_001005	0.68	0.54	0.63	0.93	0.58	0.45	0.67	0.56	0.16	0.25	0.28	0.26	0.21	0.21	0.44	0.26	0.23	0.26	0.41	0.12	0.24	0.35	0.34	0.24	0.41	0.38	0.29	0.34	0.15	0.21	0.15	0.44	0.71	0.65	0.42	0.76	0.27	0.51	0.21	0.26	0.53	0.6	0.58	0.25	0.27	0.57	0.21	0.4	0.39
XLOC_001006	7.49	8.04	9.81	8.33	8.03	6.62	7.59	8.46	8.37	8.15	7.66	8.53	10.78	10.16	8.69	8.76	6.93	7.74	6.2	5.99	6.52	5.54	7.13	7.18	7.93	7.86	7.37	6.06	6.9	6.81	5.82	6.46	6.53	7.03	8.02	6.02	6.79	6.31	7.9	6	6.18	6.2	6.78	5.51	6.66	5.7	6.28	6.75	7.66
XLOC_001007	2.49	2.84	2.6	3.12	3.53	3.5	2.91	3.3	0.41	0.35	1.14	0.52	1.06	0.61	0.57	1.07	0.51	0.63	0.39	0.41	1.11	0.41	0.89	0.69	0.45	0.45	0.51	0.54	0.64	0.55	0.88	0.95	0.51	0.55	0.54	0.41	0.5	0.75	0.54	0.45	0.77	1.1	1.53	0.43	0.89	0.83	1.76	1.46	0.57
XLOC_001008	0.75	1.05	0.69	0.93	0.79	1.02	0.57	1.6	0.15	0.16	0.24	0.1	0.2	0.18	0.09	0.18	0.17	0.18	0.22	0.33	0.2	0.38	0.32	0.51	0.35	0.05	0.23	0.29	0.31	0.32	0.25	0.15	0.36	0.02	0.44	0.03	0.16	0.29	0.07	0.11	0.12	0.39	0.19	0.36	0.5	0.45	0.32	0.32	0.21
XLOC_001009	17.44	18.94	15.48	19.83	20.98	20.92	21.21	18.72	85.29	97.11	66.61	71.67	51.42	51.07	49.55	57.31	80.02	54.78	52.68	54.51	49.88	50.21	54.83	45.66	76.84	66.92	33.89	53.94	56.31	39.11	59.61	39.57	57.53	58.64	105.67	79.14	112.31	96.16	99.01	102.25	54.76	41.42	29.18	37.5	37.98	35.3	39.46	33.43	63.54
XLOC_001010	4.32	4.95	3.52	4.41	4.68	6.28	6.47	5.39	3.57	3.49	4.04	3.53	3.75	4.44	3.64	3.33	3.87	3.3	4.02	4.32	3.99	4.67	5.48	4.12	3.81	3.17	2.76	3.39	3.85	4.21	4.82	3.08	3.65	3.33	2.74	3.1	3.86	3.84	4.32	3.19	4.94	3.97	3.29	4.3	5.03	4.38	5.18	4.38	4.55
XLOC_001011	0.43	0.3	0.71	0.19	0.55	1.05	0.78	0.98	1.54	1.43	2.43	0.66	0.55	0.39	0.59	0.28	3.55	4.46	3.24	2.24	2.6	2.6	2.84	3.39	6.21	5.8	3.11	2.84	2.57	2.68	2.28	2.63	9.65	8.67	2.24	3.87	2.08	2.72	1.86	2.39	5.83	4.98	3.03	3.32	3.35	3.46	3.01	3.84	4.58
XLOC_001012	0	0.31	0.24	0	0	0.11	0	0.29	0.62	0.83	1.03	0.28	0.14	0.9	0.26	0.08	1.58	1.74	1.6	1.41	1.08	2.09	1.68	1.13	1.93	1.78	0.85	1.31	0.78	0.71	0.11	1.26	3.54	4.21	1.42	2.65	1.19	1.85	0.92	0.3	3.1	1.19	1.04	1.13	1.17	2.23	1.35	1.79	1.71
XLOC_001013	0	0.02	0	0.03	0	0.13	0.03	0.06	0.17	0.06	0.29	0.12	0.02	0.23	0.22	0.04	0.2	0.08	0.07	0	0	0	0.17	0.35	0	0	0.14	0.4	0.05	0.04	0	0	0.42	0.27	1.17	0.75	0.32	0.87	0.77	0.41	0.12	0.04	0.16	0.17	0	0.27	0.27	0.17	0
XLOC_001014	0.08	0.39	0.12	0	0.32	0.14	0.07	0.14	0.38	0.39	0.85	0.09	0.04	0.23	0.09	0.14	0.5	0.52	1.65	0.79	1.55	0.69	1.69	0.98	0.73	0.31	0.05	0	0.76	0.24	1.58	0.3	0.94	0.3	0.84	0.08	0.84	0.68	0.57	0.28	1.03	0.27	0.87	1.07	0.48	1.52	1.22	1.77	0.55
XLOC_001015	0	0.26	0	0.06	0	0	0	0.07	0	0.48	0.04	0	0	0.13	0.04	0	0.18	0	0	0	0	0	0.3	0	0.09	0.08	0	0	0	0	0.08	0	0	0	0	0	0	0	0	0	0	0	0	0.04	0.04	0	0	0	0
XLOC_001016	0.12	0	0.12	0.15	0.05	0.08	0.25	0.2	0.2	0.16	0.18	0.32	0.22	0.35	0.27	0.15	0.14	0.15	0.02	0.09	0.08	0	0.15	0.2	0.14	0.05	0.55	0.04	0	0	0	0.06	0.2	0.03	0.15	0.05	0.04	0.19	0.43	0	0.03	0.09	0.22	0.22	0.03	0.19	0.16	0.05	0.29
XLOC_001017	0.66	0.51	0.46	1.08	1.17	1.05	0.65	1.13	0.25	0.25	0.23	0.17	0.6	0.52	0.39	0.37	0.36	0.24	0.63	0.42	0.77	0.67	0.63	0.6	0.57	0.35	0.38	0.38	0.45	0.39	0.22	0.42	0.66	0.24	0.2	0.33	0.68	0.51	0.25	0.51	0.73	0.27	0.72	0.62	1.11	0.33	0.45	0.61	0.41
XLOC_001018	0.67	0.31	0.7	2.45	0.81	0.84	0.39	0.73	0.3	0.85	0.27	1.01	0.26	0.7	0.3	0.53	0.12	0.3	0.12	0.47	0.14	0.3	0.36	0.55	0.2	0.43	0.24	0.52	0.55	0.24	0	0.3	0.33	0.59	0.09	0.86	0.58	0.16	0.14	0.38	0.1	0.48	0.29	0.78	0.34	0.26	0.31	0.19	0.07
XLOC_001019	4.09	3.91	3.05	3.88	3.61	4.29	3.76	3.85	4.72	4.97	5.36	4	4.42	4.64	4.48	3.78	8.72	6.66	6.84	5.87	6.47	6.96	6.56	5.88	7.68	4.83	5.67	5.06	5.04	5.61	5.24	4.49	6.56	5.59	5.59	4.75	4.37	7.22	5.07	4.3	8.89	6.34	5.39	6.21	5.3	6.1	6.72	5.34	8
XLOC_001020	0.18	0.22	0.25	0.14	0.28	0.43	0.29	0.47	0.02	0.01	0.08	0.02	0.02	0.01	0.02	0.04	0	0	0.05	0.01	0.02	0.01	0.03	0.11	0	0.03	0.08	0.03	0.08	0.05	0.06	0.03	0	0.01	0.04	0.03	0	0	0.05	0.05	0.01	0	0	0.03	0	0	0	0	0.01
XLOC_001021	0	0	0	0	0	0	0	0	0.01	0	0.04	0	0	0	0	0	0.39	0.48	0.49	0.72	0.53	0.57	0.38	0.38	0.32	0.39	0.5	0.47	0.29	0.59	0.2	0.24	0.39	0.29	0.1	0.02	0	0.09	0.02	0.01	0.87	0.98	0.5	0.69	0.63	0.77	0.39	0.4	0.38
XLOC_001022	0	0	0	0	0	0	0	0	0.21	0.26	0.03	0.35	0.44	0.48	0.11	0.15	0.1	0.32	0.05	0.31	0.43	0.25	0.32	0.12	0.25	0.04	0	0.28	0.31	0.19	0.08	0.02	0.11	0.04	0.25	0.07	0.22	0.21	0.29	0.06	0.07	0.04	0.08	0.08	0.22	0	0.07	0.03	0.06
XLOC_001023	0	0	0	0	0	0	0	0	0.48	0.09	0.44	2.11	2.5	1.9	0.81	0.42	0.96	0.68	0.44	1.08	1.08	0.69	0.97	0.63	0.33	0.42	0.23	0.51	0.73	0.34	0.25	0.18	0.61	0.18	0.1	0.56	0.35	0.17	0.38	0.49	0.31	0.16	0.03	0.25	0.06	0.26	0.15	0.5	0.18
XLOC_001024	4.38	4.95	7.99	6.83	6.31	8.23	5.87	5.46	1.28	1.39	2.48	2.35	2.23	3.02	2.6	2.12	1.12	1.5	3.38	0.91	1.47	1.07	1.17	2.22	1.27	1.88	3.42	1.38	1.89	1.67	1.23	1.55	4.33	2.44	1.64	2.22	1.83	2.35	1.52	1.63	2.47	1.71	1.89	1.33	1.42	2.24	0.94	1.53	1.46
XLOC_001025	4.93	9.62	6.05	9	10.8	10.81	8.84	10.15	6.56	5.46	5.77	6.19	5.59	5.5	5.54	5.54	8.35	5.36	7.64	7.86	7.39	7.02	6.55	7.19	7.29	6.03	5.1	5.77	6.37	5.4	6.81	6.1	5.09	5.41	6.57	6.72	8.69	8.15	9.04	8.3	10	6.62	5.75	6.2	6.99	6.67	8.12	6.93	8.25
XLOC_001026	0	0.42	0.32	0.99	0.86	0.49	0.34	0.06	0.7	0	0.2	1.59	1.08	0.64	0.31	0.36	0.34	0.94	0.06	0.37	0.51	0.99	0.3	0.43	0.32	0.07	0.21	0.68	0	0.67	0	0	0.36	0.69	0.23	0.43	0.48	0.13	0.87	1.06	1	0.79	0.07	0.82	0.85	0.98	0.64	0.34	0.63
XLOC_001027	0.15	0.22	0.13	0.43	0.5	0.23	0.21	0.15	0.13	0.14	0.25	0.2	0.54	0.31	0.28	0.24	0.26	0.32	0.14	0.18	0.33	0.26	0.26	0.27	0.25	0.14	0.15	0.17	0.28	0.14	0.13	0.1	0.39	0.2	0.19	0.19	0.23	0.12	0.31	0.14	0.43	0.34	0.29	0.36	0.32	0.18	0.45	0.25	0.27
XLOC_001028	0	0	0	0	0	0	0	0	0	0	0	0	0	0	0	0	0	0	0	0	0	0	0	0	0	0	0	0	0	0	0	0	0	0	0	0	0	0	0	0	0	0	0	0	0	0	0	0	0
XLOC_001029	0	0	0	0	0	0	0	0	0	0	0	0	0	0	0	0	0	0	0	0	0	0	0	0	0	0	0	0	0	0	0	0	0	0	0	0	0	0	0	0	0	0	0	0	0	0	0	0	0
XLOC_001030	0	0.05	0.11	0.02	0.1	0.06	0.02	0.06	0.2	0.35	0.24	0.35	0.14	0.23	0.12	0.29	0.98	0.99	0.46	0.31	0.65	0.31	0.08	0.3	0.86	1.23	0.4	0.41	0.76	0.28	0.11	0.25	0.42	0.35	0.29	0.55	0.57	0.28	0.08	0.59	0.27	1.06	1.22	0.67	0.43	0.66	0.14	0.81	0.42
XLOC_001031	0.05	0.36	0.03	0.02	0.12	0	0.13	0.15	0.1	0.06	0.05	0.3	0.12	0	0.13	0.07	0.28	0.23	0.1	0.05	0.18	0.06	0.35	0.06	0.12	0.05	0.08	0.06	0.09	0.07	0.01	0.12	0.05	0.18	0.09	0.17	0.08	0.05	0.17	0.16	0.03	0.03	0	0	0.23	0.07	0.07	0.08	0.14
XLOC_001032	0.17	0.23	0.12	0.09	0.13	0.17	0.18	0.18	0.21	0.15	0.11	0.16	0.23	0.12	0.15	0.11	0.41	0.36	0.13	0.11	0.18	0.14	0.17	0.25	0.14	0.23	0.12	0.11	0.14	0.04	0.29	0.09	0.23	0.17	0.07	0.23	0.28	0.16	0.25	0.16	0.07	0.16	0.01	0.03	0	0.05	0.15	0.01	0.21
XLOC_001033	0.3	0.16	0.24	0.24	0.12	0.1	0	0	0.19	0.27	0.14	0.03	0.15	0.07	0.12	0.19	0.07	0.04	0.06	0.03	0.11	0.07	0.02	0.13	0.24	0.12	0.15	0.05	0	0.05	0.18	0.29	0.24	0.33	0.25	0.35	0.44	0.47	0.03	0.24	0.05	0.02	0.15	0.06	0.21	0.04	0.22	0	0.07
XLOC_001034	1.53	1.76	1.28	1.85	2.11	1.84	1.89	1.97	0.91	1.4	1.1	1.23	1.66	1.46	1.3	1.3	0.72	0.78	0.78	1.27	1.22	1.17	1.34	1.24	0.63	0.72	0.9	0.82	0.98	0.87	1.16	1.13	0.91	0.93	0.87	1.32	1.08	1.43	1.16	1.61	0.74	0.9	0.99	1.09	1.61	1.02	1.28	1.36	0.56
XLOC_001035	0	0	0	0	0	0	0	0	0	0	0	0	0	0	0	0	0	0	0	0	0	0	0	0	0	0	0	0	0	0	0	0	0	0	0	0	0	0	0	0	0	0	0	0	0	0	0	0	0
XLOC_001036	6.89	7.44	7.61	9.38	6.88	7.19	6.37	7.1	1.44	1.76	1.77	1.48	2.42	2.29	1.43	1.73	1.6	1.92	1.88	1.35	3.09	2.22	2.24	1.92	0.86	1.05	1.91	1.17	1.24	1.49	0.89	1.45	1.97	1.42	2.81	1.77	1.56	2.63	3.43	0.91	1.52	2.48	1.99	2.3	1.89	2.84	3.46	1.79	1.46
XLOC_001037	18.39	21	20.86	22.56	26.16	34.8	33.61	34.87	7.22	7.27	8.43	7.63	6.38	7.68	5.72	5.54	9.14	5.74	10.77	12.08	9.38	12.54	11.06	12.02	8.63	8.13	8.01	10.13	7.82	10.54	12.29	9.25	6.95	7.05	6.73	8.35	11.03	12.69	8.56	8.8	12.74	9.5	10.24	11.39	13.11	11.78	11.87	13.38	10.35
XLOC_001038	1.73	1.98	1.66	1.43	1.51	2.25	1.38	1.5	1.08	1.19	0.9	1	1.05	1.13	1.77	0.95	1.23	1.25	1.03	0.99	1.09	1.07	1.18	0.91	0.86	0.62	0.83	1.1	0.94	0.67	0.65	1.11	0.67	1.1	0.33	0.35	0.54	1.53	1.21	0.62	1.16	1.39	0.84	1.19	1.36	1.01	1.71	1.47	0.62
XLOC_001039	0.5	0.7	0.28	0.48	0.53	0.86	0.7	0.44	0.34	0.34	0.4	0.18	0.21	0.63	0.4	0.47	0.24	0.33	0.19	0.19	0.28	0.37	0.27	0.16	0.26	0.36	0.47	0.34	0.22	0.41	0.66	0.38	0.42	0.4	0.29	1.09	0.13	0.59	0.71	0.22	0.34	0.76	0.45	0.14	0.32	0.51	0.52	0.16	0.65
XLOC_001040	0.1	0.28	0.59	0.2	0.05	0.04	0.23	0.63	0.18	0.27	0.77	0.3	0.19	0.11	0.03	0.06	0.27	0.22	0.05	0.05	0.05	0.12	0.69	0.17	0.11	0.08	0.29	0.18	0.06	0.42	0.33	0.25	0.37	0.87	0.29	0	0	0.68	0.06	0.11	0.25	0.14	0.23	0.08	0.36	0.24	0.48	0.24	0.34
XLOC_001041	1.35	1.57	1.35	1.4	1.25	1.74	1.64	1.52	0.07	0.27	0.19	0.21	0.39	0.39	0.37	0.32	0.15	0.23	0.1	0.21	0.07	0.31	0.24	0.28	0.16	0.11	0.15	0.12	0.23	0.22	0.19	0.24	0.27	0.23	0.14	0.17	0.25	0.25	0.18	0.18	0.3	0.38	0.22	0.21	0.21	0.36	0.35	0.31	0.23
XLOC_001042	0	0	0	0	0	0	0	0	0	0	0	0	0	0	0	0	0	0	0	0	0	0	0	0	0	0	0	0	0	0	0	0	0	0	0	0	0	0	0	0	0	0	0	0	0	0	0	0	0
XLOC_001043	0	0	0	0	0	0	0	0	0	0	0	0	0	0	0	0	0	0	0	0	0	0	0	0	0	0	0	0	0	0	0	0	0	0	0	0	0	0	0	0	0	0	0	0	0	0	0	0	0
XLOC_001044	0.14	0.11	0.16	0.13	0.02	0.12	0.27	0.18	0.12	0.04	0.32	0.13	0.05	0.06	0.06	0.04	0.14	0.06	0.23	0.35	0.04	0.22	0.13	0.17	0.18	0.01	0.14	0.01	0.03	0.08	0.11	0.01	0.11	0.03	0	0.2	0.04	0.07	0.13	0.05	0.16	0.07	0.01	0.03	0.04	0.11	0.09	0	0.13
XLOC_001045	1.18	0.75	1.24	0.66	0.68	1.79	2.1	0.73	0.28	0.4	0.29	0.04	0.86	0.47	0.57	0.44	0	0	0.14	0	0.06	0.25	0	0.06	0	0.04	0.31	0	0.13	0.08	0	0	0	0.2	0.26	0.27	0	0.07	0.72	0.39	0.15	0	0	0	0.08	0	0.14	0.19	0.16
XLOC_001046	1.48	1.19	1.62	1.41	1.75	2.35	1.41	1.62	0.77	0.64	0.52	0.83	1.02	1.13	0.93	1.09	0.59	0.96	0.72	0.84	0.7	0.99	0.49	1.12	0.7	0.51	0.72	0.52	0.7	0.82	0.37	0.52	0.8	0.64	0.65	0.89	0.34	0.84	0.46	0.87	0.77	0.88	0.77	1.18	0.7	0.93	0.71	1.04	0.48
XLOC_001047	18.29	19.64	21.29	22.06	24.16	29.7	24.23	23.98	17.54	18.53	22.64	20.88	18.93	19.73	17.94	19.62	14.16	16.25	21.63	19.74	20.17	21.87	21.27	20.43	13.62	13.31	18.51	19.38	19.97	20.31	25.52	17.48	14.39	14.68	17.55	17.48	18.51	18.93	19.52	20.78	12.47	13.32	19.35	16.61	18.12	18.23	19.2	18.53	13.96
XLOC_001048	0.11	0.2	0.1	0.13	0.13	0.4	0.05	0.22	0.1	0.14	0.06	0.1	0.1	0.14	0.02	0.28	0	0	0	0	0.1	0.03	0	0.02	0.09	0	0.2	0.14	0	0.29	0	0.15	0	0.1	0	0.11	0	0.48	0	0.12	0.04	0.06	0	0	0.03	0.07	0	0.07	0.03
XLOC_001049	9.46	14.09	9.64	15.64	12.62	14.96	12.39	9.73	3.17	3.51	3.85	3.26	2.71	3.09	3.56	1.98	2.98	3.54	3.42	3.88	4.32	4.12	4.33	2.33	3.37	3.18	2.33	2.97	3.51	4.46	5.19	2.35	4.33	5.04	3.56	3.4	3.22	4.13	3.61	2.52	2.88	3.91	3.52	3.61	4.85	3.13	4.1	4.45	2.86
XLOC_001050	1.45	2.09	1.35	1.82	1.52	2.01	1.58	1.83	0.85	1.13	1.11	1.18	0.74	1.1	0.73	0.98	0.8	0.85	1.11	1.07	1.37	1.18	1.37	1.45	1.22	0.73	1.11	1.06	0.94	1.15	1.35	1.27	1.02	1.15	1.05	1.15	0.79	1.66	1.3	0.83	1.09	1.07	1.05	1.14	1.55	1.17	1.14	1.41	0.64
XLOC_001051	0	0	0	0	0	0	0	0	0.01	0.03	0.01	0	0.05	0.01	0.01	0.01	0.02	0.02	0.02	0.06	0	0	0	0.01	0	0.03	0.02	0	0.06	0.01	0	0	0.02	0	0.02	0	0.01	0	0	0.04	0.01	0.01	0	0	0	0	0	0	0.03
XLOC_001052	0	0	0	0.02	0	0	0	0	0.38	0.17	0.39	0.18	0	0	0.09	0.02	0.19	0.09	0.15	0.02	0.21	0.13	0.05	0.05	0.51	0.07	0.23	0	0.03	0.15	0.22	0.28	0.33	0.17	0.31	0.65	0.43	0.45	0.27	1.17	0.14	0.03	0.02	0	0.17	0	0.14	0	0.21
XLOC_001053	0	0	0	0	0	0	0	0	0	0	0	0	0	0.06	0	0	0.35	0.22	0.05	0	0	0	0	0.17	0.17	0	0.06	0	0	0	0	0	0	0	0	0	0.04	0	0	0	0	0	0	0	0.03	0	0	0	0.11
XLOC_001054	0.32	0.09	0.18	0.03	0.1	0.18	0.02	0.15	0.57	0.65	0.2	0.16	0.21	0.24	0.29	0.21	0.54	0.2	0.53	0.31	0.21	0.26	0.4	0.23	0.35	0.49	0.23	0.33	0.04	0.06	0.1	0.08	0.31	0.23	0.2	0.17	0.47	0.22	0.22	0.33	0.43	0.45	0.22	0.33	0.15	0.23	0.09	0.03	0.5
XLOC_001055	0.16	0.25	0.11	0.12	0.06	0.43	0.46	0.06	0.07	0	0.07	0	0.08	0.04	0.03	0.11	0.02	0.09	0.16	0.12	0.03	0.42	0.02	0.08	0.18	0.07	0.28	0.15	0.12	0.65	0.03	0.08	0.11	0.32	0.09	0.37	0.08	0.03	0.4	0.28	0.02	0.14	0.3	0.43	0.24	0.11	0.57	0.17	0.04
XLOC_001056	2.11	2.34	1.86	2.1	2.68	3.08	2.8	1.77	0.51	0.58	0.27	0.56	0.52	0.44	0.47	0.3	0.48	0.53	0.7	0.71	0.95	0.91	0.47	0.46	0.72	0.3	0.54	0.31	1.29	0.63	0.91	0.6	0.88	0.45	0.8	0.35	0.64	0.7	0.48	0.26	1.16	1.05	1.63	2.09	2.81	1.65	1.05	2.15	0.89
XLOC_001057	0.04	0	0	0	0.13	0.02	0	0	0	0	0.03	0	0	0.03	0.02	0.03	0	0.13	0.07	0.2	0	0.25	0.02	0.19	0	0.01	0.05	0.27	0.15	0.11	0.14	0	0	0.03	0.06	0	0	0	0	0.05	0.06	0.01	0.26	0.06	0.08	0.27	0.03	0.08	0
XLOC_001058	0	0	0.03	0.01	0	0.02	0	0	0	0.02	0.07	0	0	0.06	0.02	0.01	0	0.11	0.13	0.17	0.06	0.17	0.04	0.11	0.04	0	0.15	0.08	0.01	0.44	0.02	0.11	0.03	0.07	0.12	0.09	0.02	0.26	0.04	0	0.18	0.13	0.2	0.13	0.13	0.49	0.06	0.19	0.02
XLOC_001059	1.36	2.29	1.56	1.03	1.86	1.96	2.07	3.31	1.08	1.43	2.25	1.69	1.51	1.06	2.84	2.23	1.75	1.71	2.24	1.96	2.28	1.82	2.45	2.17	1.72	1.58	2.51	2.47	1.29	1.9	2.15	1.87	3.19	3.65	4.72	5.37	3.17	7.32	4.86	7.51	1.75	1.55	1.74	2.7	1.41	1.79	2.82	2.48	1.49
XLOC_001060	0.43	0.4	0.29	0.5	0.24	1.22	0.87	0.74	0.09	0.04	0.02	0.1	0.04	0.18	0.09	0.1	0.02	0.12	0.11	0.06	0.02	0.23	0	0.07	0.05	0.15	0.12	0.02	0	0.16	0.1	0	0.17	0.2	0.1	0.01	0	0.25	0.17	0.01	0.07	0.09	0.16	0.02	0	0.18	0.14	0.13	0.05
XLOC_001061	0.58	0.64	0.47	0.79	0.34	2.32	0.62	0.75	0.19	0.14	0.22	0.05	0.09	0.2	0.14	0.2	0.12	0.29	0.23	0.34	0.11	0.58	0.14	0.11	0.1	0.25	0.3	0.35	0.02	0.45	0.2	0.22	0.33	0.39	0.05	0.17	0.04	0.44	0.35	0.34	0.46	0.21	0.58	0.37	0.12	0.38	0.68	0.44	0.17
XLOC_001062	0.76	0.65	0.73	0.93	2.66	1.62	1.2	1.27	0.26	0.52	0.41	0.54	0.79	0.32	0.4	0.35	0.15	0.5	0.64	0.68	0.43	0.43	0.56	0.41	0.43	0.26	0.63	0.23	1.33	0.4	0.32	0.62	0.55	0.49	0.24	0.09	0.33	0.07	0.52	0.5	0.14	0.54	0.43	0.43	1.24	0.44	0.69	0.65	0.18
XLOC_001063	2.71	3.57	2.4	2.6	3.29	4.8	2.47	3	1.42	1.07	1.57	1.16	1.69	1.65	1.39	1.26	1.44	1.68	1.46	1.35	1.86	1.99	1.49	1.71	1.12	0.96	1.03	0.67	1.33	1.73	0.76	1.32	1.66	1.48	1.12	0.87	1.3	1.33	2.06	1.25	1.66	1.86	1.52	1.45	1.82	1.39	2.54	1.64	1.03
XLOC_001064	0.69	0.54	0.62	0.77	0.89	0.88	1.02	0.58	0.39	0.48	0.58	0.39	0.47	0.49	0.26	0.34	0.79	0.71	0.83	0.79	0.89	0.67	0.75	0.63	1.09	0.66	0.96	0.78	0.74	0.74	0.57	0.61	0.43	0.76	0.45	0.31	0.51	0.45	0.43	0.45	0.79	0.71	1.06	0.55	1.35	1.19	0.61	0.36	0.73
XLOC_001065	0	0	0	0	0	0	0	0	0	0	0	0.02	0	0	0	0	0	0	0	0.18	0	0	0	0.23	0.03	0	0.15	0	0	0.08	0	0	0	0.07	0	0	0	0	0	0	0	0	0.05	0.07	0	0.49	0	0	0
XLOC_001066	0	0	0	0	0	0	0	0	0.1	0	0.03	0	0.09	0	0	0	0	0.04	0	0	0	0	0	0.05	0	0	0.52	0	0.07	0	0	0	0	0	0.11	0.06	0.1	0	0.14	0.26	0	0	0	0	0	0	0	0	0
XLOC_001067	0	0	0	0	0	0	0	0	0	0	0	0	0	0	0	0	0	0	0	0	0	0	0	0	0	0	0	0	0	0	0	0	0	0	0	0	0	0	0	0	0	0	0	0	0	0	0	0	0
XLOC_001068	1.34	1.49	1.57	1.68	1.99	1.56	1.36	1.9	0.7	0.84	1.29	1.33	1.2	1.1	0.83	1.07	1.09	1.34	1.48	1.81	1.68	1.26	1.59	1.57	0.86	0.35	1.33	1.39	1.31	1.12	1.23	1.27	0.55	1.14	0.81	0.8	1.02	0.84	1.23	0.53	1.27	1.48	2.49	3.38	2.23	2.52	2.49	2.82	0.95
XLOC_001069	0	0	0	0	0	0	0	0	0	0	0	0	0	0	0	0	0	0	0	0	0	0	0	0	0	0	0	0	0	0	0	0	0	0	0	0	0	0	0	0	0	0	0	0	0	0	0	0	0
XLOC_001070	5.73	4.96	8.71	5.39	3.85	3.33	4.05	3.39	2.05	1.87	1.59	1.75	1.86	2.02	4.96	2.47	2.4	2.81	1.27	1.9	1.3	1.08	1.1	1.64	2.51	2.87	2.05	1.38	1.13	1.24	0.8	1.13	3.43	3.08	1.88	2.4	1.31	1.62	2.03	1.63	2.36	1.88	2.29	1.52	1.52	1.66	1.37	1.25	2.2
XLOC_001071	0	0	0	0	0	0	0	0	0.19	0.15	0.07	0.24	0.32	0.47	0.13	0.24	0	0.1	0.05	0.14	0	0.06	0.07	0.2	0.05	0	0.08	0.22	0	0	0.15	0	0	0.07	0.09	0.14	0	0	0.27	0.1	0	0	0.03	0.02	0	0.03	0.19	0.13	0.05
XLOC_001072	5.35	5.42	7.58	6.1	6.47	5.66	5.78	7.1	17.88	17.18	19.36	18.69	17.54	16.99	17.35	21.8	12.92	14.06	13.48	14.7	13.61	11.42	14.63	12.59	11.05	11.18	14.8	13.28	13.9	10.53	11.36	12.4	11.08	12.49	10.95	12.39	13.64	9.74	14.13	12.62	9.1	11.5	13.52	12.31	14.58	11.54	14.2	13.74	10.82
XLOC_001073	0	0	0	0	0	0	0	0	0	0	0	0	0	0	0	0	0	0	0	0	0.14	0	0	0	0	0.3	0	0	0.19	0	0	0.06	0.04	0	0	0	0	0	0	0	0.3	0.36	0	0.08	0.06	0	0	0.03	0.17
XLOC_001074	0	0	0	0	0	0	0	0	0.02	0	0	0	0	0	0	0	0	0	0.08	0.15	0.37	0	0.02	0	0.19	0.03	0	0.15	0	0	0	0	0.2	0.04	0.07	0	0	0.11	0	0	0.85	0.49	0.04	0.03	0.24	0.15	0.05	0.03	0.32
XLOC_001075	0	0	0	0	0	0	0	0	0	0	0	0	0	0.04	0	0	0	0	0.13	0	0.06	0	0.05	0	0.04	0	0	0	0.24	0	0	0	0	0	0	0	0	0	0	0	0.35	0.1	0	0	0.07	0.08	0.09	0	0.14
XLOC_001076	0	0	0	0	0.15	0.05	0	0	0.04	0.16	0.2	0.11	0.21	0.17	0.03	0.19	0.21	0	0.24	0.15	0.35	0.11	0.36	0.2	0.23	0.2	0.35	0.39	0.56	0.11	0.69	0.11	0.09	0.04	0.25	0.03	0.31	0.19	0.07	0.1	0.31	0.46	0.03	0.12	0.46	0.09	0.04	0.04	0.1
XLOC_001077	0	0	0	0	0	0	0	0	0.04	0.14	0.01	0.13	0	0.13	0.12	0.04	0.07	0.1	0.02	0	0	0.07	0.11	0.06	0	0.03	0.08	0.08	0.01	0.14	0	0.12	0.09	0.04	0	0.09	0.03	0	0	0.07	0	0	0.02	0	0.02	0	0	0	0.13
XLOC_001078	0	0	0	0	0	0	0	0	0.2	0.41	0.21	0.25	0.14	0.26	0.1	0.37	0	0.04	0	0	0.07	0.29	0.23	0.11	0	0.06	0.12	0.17	0	0	0	0.05	0.04	0.08	0	0.1	0	0.08	0	0.06	0	0	0	0	0	0	0	0	0
XLOC_001079	0.16	0.26	0.69	0.43	0.3	0.23	0.39	0.32	7.15	4.86	9.21	4.66	0.88	1.48	1.72	1.09	6.26	6.42	8.88	9.01	8.24	5.85	9.19	7.26	6.23	3.6	3.04	2.02	3.53	3.3	4.24	4.89	16.27	18.67	15.31	15.13	5.75	10.38	6.44	5.03	1.86	1.88	1.55	2.32	1.25	1.36	2.71	1.75	4.85
XLOC_001080	0	0.02	0	0.02	0	0	0	0	0.07	0.05	0.15	0	0.03	0	0.01	0.03	0.17	0.08	0.12	0.1	0.3	0.16	0.06	0.14	0.27	0.09	0.37	0.07	0.15	0.15	0.02	0.11	0.1	0.1	0.13	0.31	0.07	0.04	0.02	0.02	0.1	0.03	0.12	0.11	0	0.14	0	0.02	0.11
XLOC_001081	0	0	0	0	0	0	0	0	0	0	0.13	0.03	0	0	0	0.02	0	0.08	0.22	0.27	0.1	0.33	0.11	0.12	0	0.36	0.12	0.07	0.33	0.33	0	0	0	0.28	0.15	0.08	0.02	0.34	0.06	0	0.05	0	0.17	0.18	0.03	0	0.28	0.02	0
XLOC_001082	0	0	0	0	0	0	0.03	0.03	0	0.03	0.06	0	0.03	0	0	0	0.07	0.19	0.09	0.17	0.26	0.14	0.21	0.1	0	0.19	0.2	0.05	0.02	0.07	0.14	0.14	0.04	0.04	0.14	0	0.05	0	0.03	0	0.08	0	0.05	0.29	0	0.05	0.02	0.04	0
XLOC_001083	0	0	0.1	0	0.09	0.15	0	0.06	0.01	0.22	0.7	0	0.02	0.01	0.09	0.06	0.12	0.24	0.29	0.04	0.38	0.43	0.19	0.13	0.14	0.1	0.1	0.06	0.32	0.29	0.24	0.15	0.24	0.16	0.21	0.04	0.02	0	0	0.1	0.18	0.02	0.15	0	0.08	0.07	0.23	0.06	0.05
XLOC_001084	0	0	0	0	0	0	0	0	0	0	0.22	0.03	0	0	0	0	0	0.21	0.42	0.23	0.22	0.14	0.28	0.41	0.2	0.07	0.43	0	0.52	0	0.74	0.51	0.47	0.26	0.28	1.46	0	0	0.07	0	0	0.03	0.1	0.03	0.35	0.04	0.08	0.12	0
XLOC_001085	0	0	0	0	0	0	0	0	0	0	0	0	0	0	0	0	0	0	0	0	0	0	0	0	0	0	0	0	0	0	0	0	0	0	0	0	0	0	0	0	0	0	0	0	0	0	0	0	0
XLOC_001086	0.07	0.12	0	0	0.07	0.09	0.13	0.13	0.36	0.28	0.06	0	0.04	0.14	0.08	0.06	0.08	0.05	0.14	0	0.1	0.48	0.14	0.24	0.54	0.2	0.04	0.15	0.13	0.15	0.11	0.04	0.18	0.11	0.27	0	0.06	0.44	0.37	0.2	0.04	0.18	0.08	0	0.15	0.69	0.05	0.02	0.24
XLOC_001087	0.94	0.89	0.57	0.61	0.99	0.65	0.92	1	0.59	0.42	0.37	0.64	0.21	0.2	0.39	0.39	0.36	0.27	0.16	0.33	0.29	0.14	0.21	0.32	0.41	0.17	0.16	0.38	0.16	0.11	0.2	0.28	0.58	0.3	0.33	0.8	0.41	0.33	0.55	0.83	0.33	0.13	0.16	0.16	0.05	0.05	0.19	0.16	0.47
XLOC_001088	0.35	0.26	0.31	0.62	0.13	0.86	1.31	0.42	0.38	0.39	0.54	0.53	0.35	0.68	0.72	0.4	0.67	0.59	0.31	0.67	0.16	0.74	0.31	0.67	0.58	0.14	0.53	0.2	0.19	0.36	0.67	0.42	0.13	0.29	0.16	0.17	0.3	0.27	0.55	0.54	0.52	0.33	0.32	0.28	0.49	0.26	0.47	0.68	0.29
XLOC_001089	0.15	0.16	0.24	0.16	0.24	0.32	0.29	0.29	0.36	0.37	0.83	0.48	0.45	0.54	0.77	0.75	0.67	0.91	0.52	0.5	0.78	0.5	0.42	0.58	0.46	0.78	0.74	0.43	0.78	0.67	0.43	0.6	0.96	1.12	1.37	1.29	1.19	1.81	1.07	1.75	0.51	0.56	0.52	0.47	0.54	0.4	0.44	0.53	0.7
XLOC_001090	0	0	0.04	0.12	0.02	0	0	0.08	0.14	0.07	0.11	0	0.01	0.08	0.09	0.04	0.17	0.07	0.07	0.07	0.03	0.02	0.15	0.06	0.12	0.14	0.12	0.05	0.01	0.02	0	0.03	0.15	0.15	0.29	0.04	0.03	0.15	0.02	0.06	0.16	0.11	0.35	0.03	0.11	0.09	0.06	0.11	0.12
XLOC_001091	0.35	0.42	0.51	0.36	0.37	0.48	0.27	0.39	0.3	0.21	0.19	0.13	0.39	0.42	0.26	0.33	0.27	0.47	0.24	0.24	0.36	0.3	0.26	0.24	0.18	0.38	0.36	0.17	0.19	0.52	0.19	0.4	0.36	0.52	0.27	0.1	0.19	0.3	0.33	0.11	0.49	0.9	0.94	0.83	0.86	0.79	0.76	0.73	0.26
XLOC_001092	0	0	0	0	0	0.02	0	0	0	0	0	0	0.04	0	0	0	0	0	0	0	0	0.21	0	0	0	0.08	0.04	0	0	0.45	0.01	0	0	0.04	0	0.05	0	1.73	0	0.03	0	0.08	0	0.01	0	0.33	0.02	0	0
XLOC_001093	0.22	0.33	0.88	0.5	0.75	1.33	0.47	0.77	0.39	0.68	1.97	0.79	0.6	0.9	0.81	0.98	0.22	0.35	1.12	0.61	0.47	0.91	0.41	0.77	0.38	0.58	1.28	0.59	1	1.59	0.44	0.93	0.8	1.8	4.3	2.14	2.21	4.87	1.66	3.02	0.72	0.85	1.39	1.02	1.16	1.24	1.19	0.76	0.69
XLOC_001094	1.99	2.41	1.95	2.14	2.16	2.25	1.84	1.95	1.35	1.18	1.73	1.62	1.49	1.61	1.11	1.39	1.33	1.38	1.74	1.58	1.58	1.46	1.45	1.57	1.19	1.08	1.86	1.43	1.4	1.36	1.65	1.31	1.7	1.09	1.53	1.18	1.06	1.76	1.05	1.04	1.51	1.82	2.29	1.79	1.85	1.69	1.92	2.31	1.69
XLOC_001095	2.23	2.06	1.12	1.82	1.24	1.93	1.16	1.38	0.58	0.79	0.61	0.66	1.04	1.11	1.17	0.69	0.34	0.76	0.33	0.39	0.56	0.36	0.45	0.3	0.61	0.27	0.36	0.24	0.39	0.44	0.12	0.27	0.95	0.86	0.6	0.61	0.73	0.92	1.06	0.45	0.33	0.43	0.64	0.4	0.47	0.28	1.26	0.86	0.53
XLOC_001096	0	0	0	0.03	0	0	0	0	0	0.06	0.12	0.06	0.02	0	0	0	0.44	0.14	0.27	0.22	0	0.09	0.12	0.23	0.38	0.21	0.02	0.04	0.28	0.2	0.06	0.14	0.39	0	0.07	0.07	0	0.28	0	0.09	0.69	0.08	0.55	0	0.36	0.27	0.44	0.46	0.56
XLOC_001097	0.24	0.24	0.15	0.23	0.14	0.21	0.15	0.13	0.55	0.36	0.95	0.2	0.29	0.17	0.23	0.27	1.97	2.45	2.61	2.58	2.59	1.97	2.86	1.89	1.37	1.36	1.53	1.87	1.76	1.36	2.17	1.36	1.06	0.76	0.71	0.3	0.42	0.64	0.6	0.44	1.48	1.47	2.28	1.68	1.46	1.89	2.5	1.78	1.41
XLOC_001098	14.84	16.53	12.71	17.85	16.52	21.74	18.34	15.49	9.76	10.94	18.04	14.44	11.56	12.08	11.47	10.45	16	12.23	22.2	25.63	22.49	24.31	25.54	25.09	19.15	19.55	21.64	24.31	23.87	26.39	30.49	28.27	20.03	20.95	16.95	16.61	15.5	18.85	18.04	17.07	39.52	38.99	42.32	45.66	49.93	43.95	47.25	49.43	23.1
XLOC_001099	0.64	0.51	0.43	0.99	0.44	0.87	0.84	0.9	0.17	0.27	0.15	0.34	0.45	0.97	0.36	0.58	0.34	0.34	0.16	0.57	0.44	0.56	0.53	0.47	0.52	0.5	0.23	0.26	0.34	0.6	0.17	0.26	0.53	0.5	0.13	0.22	0.24	0.62	0.46	0.29	0.61	0.61	0.84	0.41	0.32	0.55	0.68	0.43	0.52
XLOC_001100	0.21	0.06	0.25	0	0.3	0.04	0.16	0.57	0.05	0.05	0	0	0.02	0.05	0	0.02	0	0	0.04	0	0	0.05	0.07	0.04	0	0	0	0.04	0	0	0.25	0	0	0	0.04	0.08	0	0.09	0	0	0	0	0.12	0	0.13	0	0	0	0
XLOC_001101	0	0	0.03	0	0	0	0.04	0.04	0.07	0	0.04	0.04	0.07	0.09	0	0	0.09	0.12	0.12	0.12	0.04	0.05	0.1	0	0	0.27	0.05	0	0.13	0	0	0	0.12	0	0.04	0.16	0	0.04	0.14	0.14	0	0	0.18	0	0	0.07	0	0.08	0.09
XLOC_001102	0	0	0	0	0	0	0	0.02	0.2	0.16	0.23	0.09	0	0.27	0.09	0.04	0.1	0.13	0.32	0.33	0.26	0.14	0.09	0.27	0.05	0.12	0.21	0.06	0.06	0	0.2	0.12	0.08	0.03	0.04	0.02	0.27	0.07	0.03	0.05	0.01	0.15	0.05	0.07	0.08	0.36	0	0.12	0.05
XLOC_001103	0.03	0.06	0	0.1	0	0.05	0.06	0.05	0.05	0	0.02	0	0.05	0.1	0	0.07	0.16	0.15	0.03	0.18	0.19	0.41	0.1	0.31	0.07	0.32	0.15	0.06	0	0.07	0.11	0.24	0.11	0.09	0	0	0.03	0	0	0.24	0.27	0	0	0.28	0	0.09	0.17	0.27	0.07
XLOC_001104	0	0	0.31	0.21	0.05	0.09	0.05	0.53	0.29	0.11	0.14	0	0	0.09	0	0	0.04	0.23	0.05	0.16	0.1	0	0.17	0.23	0	0.03	0.06	0.22	0	0.48	0.09	0.4	0.04	0.32	0	0.11	0	0.11	0.06	0.18	0.06	0.27	0.21	0.33	0.03	0.07	0	0.07	0
XLOC_001105	0.59	1.2	0.76	0.83	0.52	1.36	0.48	1.63	0.39	0.28	0.07	0.28	0.25	0.37	0.51	0.34	0.25	0.23	1.13	0.45	0.24	0.64	0.52	0.84	0.26	0.51	0.26	0.48	0.21	0.35	0.64	0.65	1	0.83	0.92	0.45	0.34	0.95	1.14	0.07	0.47	0.4	0.44	0.4	0.27	0.83	1.52	0.22	0.59
XLOC_001106	0	0.35	0.15	0.17	0	0.07	0.08	0.15	0.05	0.05	0.02	0.07	0	0.15	0	0.07	0.1	0.03	0.13	0.08	0.04	0	0.14	0.04	0	0	0.05	0.04	0.05	0	0.12	0	0.06	0.1	0.44	0.21	0.37	0.58	0.4	0.24	0.09	0.09	0.1	0.02	0	0.03	0.09	0.09	0
XLOC_001107	0.44	0	0.37	0.15	0.22	0.29	0.07	0.29	0.65	0.41	1.09	0.8	0.32	0.56	0.26	0.43	0.65	0.45	0.93	0.25	0.47	0.36	0.06	0.22	1.46	0.83	0.89	0.76	0.37	0.57	0.53	0.27	0.59	0.08	0.45	1.04	0.95	0.65	0.3	2.03	0.43	0.3	1.24	0.57	0.02	0.27	0.27	0.15	0.79
XLOC_001108	0.23	0.17	0.14	0.18	0.25	0.17	0.16	0.13	0.03	0.28	0.31	0.28	0.2	0.16	0.08	0.22	0.46	0.18	0.1	0.27	0.18	0.18	0.1	0.26	0.2	0.3	0.39	0.53	0.41	0.4	0.28	0.12	0.2	0.24	0.3	0.17	0.02	0.39	0.12	0.25	0.3	0.14	0.32	0.06	0.37	0.33	0.43	0.24	0.2
XLOC_001109	0.11	0.24	0.28	0.22	0.38	0.09	0.35	0.34	0.02	0.29	0.2	0.24	0.17	0.32	0.17	0.16	0.11	0.05	0.28	0.17	0.03	0.17	0.19	0.18	0.18	0.25	0.22	0.11	0.07	0.13	0.23	0.02	0.05	0.03	0.1	0	0.18	0	0	0.08	0.31	0	0.02	0.14	0.04	0.27	0.26	0.07	0.24
XLOC_001110	0.04	0	0.15	0.13	0.25	0.22	0.19	0.08	0.02	0	0.11	0.09	0.09	0.05	0.05	0.15	0	0.09	0.13	0.12	0.08	0.21	0.17	0.11	0.12	0	0.1	0.15	0.05	0.3	0	0.1	0.03	0.06	0.04	0	0	0.04	0	0	0.21	0.02	0.02	0.24	0.28	0.08	0.32	0.06	0.19
XLOC_001111	0	0	0	0	0	0	0	0	0	0	0	0	0	0	0	0	0	0	0	0	0	0	0	0	0	0	0	0	0	0	0	0	0	0	0	0	0	0	0	0	0	0	0	0	0	0	0	0	0
XLOC_001112	0	0	0	0	0	0	0	0	0	0	0.36	0.07	0	0.08	0	0.16	0	0	0	0	0	0	0	0	0	0	0	0	0	0	0	0	0	0	0	0	0	0	0	0	0	0	0	0	0	0	0	0	0
XLOC_001113	0	0	0	0.05	0	0	0	0	0.19	0.07	0.07	0.16	0.35	0.37	0.24	0.15	0.1	0	0	0	0.12	0.12	0.18	0	0.04	0.02	0	0	0.45	0.23	0.09	0.44	0	0	0	0.06	0.28	0	0.15	0	0	0	0	0	0	0.04	0	0	0.11
XLOC_001114	0.12	0.12	0.08	0.1	0.06	0.11	0.16	0.14	0.33	0.43	0.38	0.47	0.39	0.47	0.5	0.74	0.32	0.31	0.33	0.45	0.56	0.58	0.69	0.9	0.35	0.3	0.37	0.34	0.33	0.57	0.62	0.64	0.33	0.5	0.32	0.39	0.33	0.49	0.68	0.82	0.36	0.34	0.2	0.26	0.35	0.2	0.65	0.56	0.63
XLOC_001115	0	0	0	0	0	0	0	0	0.08	0.13	0.22	0.23	0.31	0.21	0.16	0.35	0.14	0.22	0.18	0.1	0.67	0.21	0.25	0.5	0.05	0	0.02	0	0.29	0.27	0.38	0.37	0.13	0.1	0.33	0.21	0.22	0.04	0.48	0.04	0.06	0.1	0.33	0.23	0.48	0.27	0.41	0.35	0
XLOC_001116	0.06	0	0	0	0	0	0	0	0	0.2	0.03	0	0.45	0.04	0.04	0	0.05	0.23	0.06	0.12	0.06	0	0	0	0	0.28	0.11	0.17	0.04	0	0	0	0	0	0.06	0	0.33	0.46	0	0	0	0	0	0	0	0	0	0	0
XLOC_001117	0	0.04	0.16	0	0	0	0	0	0.07	0.06	0.03	0	0.15	0.19	0.09	0.3	0.04	0.12	0.4	0	0.1	0.21	0	0.05	0	0.16	0	0	0.28	0.1	0.37	0	0.08	0.13	0.05	0.22	0.54	0.24	0.33	0.06	0	0	0	0.17	0.1	0.07	0	0.12	0
XLOC_001118	0.44	0.32	0.5	0.45	0.03	0.16	0.26	0.22	0.26	0.58	0.38	0.17	0.2	0.07	0.09	0.29	0.17	0.2	0.38	0.34	0.29	0.27	0.13	0.08	0.26	0.16	0.27	0.25	0.02	0.21	0.36	0.29	0.39	0.19	0.03	0.34	0.11	0.1	0.15	0.18	0.14	0.16	0.32	0.22	0.45	0.09	0.51	0.09	0.21
XLOC_001119	0	0	0	0	0	0	0	0	0.21	0.16	0.03	0.27	0.14	0.29	0.26	0.24	0	0.07	0	0.05	0.09	0	0	0	0	0.06	0.03	0	0	0	0	0.09	0	0.11	0.24	0.25	0.27	0.11	0.24	0.41	0	0	0.29	0.05	0	0.12	0	0	0.06
XLOC_001120	0	0	0	0	0	0	0	0	0.14	0.5	0.37	0.17	0.1	0.14	0.27	0.39	0.04	0.1	0.02	0.08	0	0.02	0.05	0.03	0.04	0.04	0.03	0	0	0	0.11	0	0.1	0.2	0.27	0.3	0.43	0.28	0.34	0.44	0	0	0	0	0	0	0	0	0.07
XLOC_001121	0	0	0	0	0	0	0	0	0	0.06	0.06	0.08	0.04	0.06	0.37	0	0	0	0	0	0	0	0	0	0	0	0	0	0	0	0	0	0.05	0	0.14	0.11	0	0	0.09	0	0	0	0	0.02	0	0	0	0	0
XLOC_001122	0.03	0.03	0	0	0.05	0	0	0.01	0.07	0	0.15	0.12	0.02	0.01	0.02	0.01	0.27	0.1	0.06	0.16	0.04	0.14	0.03	0.06	0.65	0.11	0.02	0.02	0	0	0.01	0.03	0.66	0.51	0.04	0.33	0	0.01	0.1	0.06	0.12	0.01	0.02	0.39	0	0.02	0.08	0.02	0.24
XLOC_001123	0	0	0.02	0	0	0	0	0	0.05	0.11	0	0.1	0	0	0	0.03	0.05	0.04	0.06	0.03	0	0	0.05	0	0.08	0	0	0	0	0	0	0	0.3	0.07	0	0	0	0.06	0.07	0	0.03	0	0	0.06	0	0	0.24	0	0.07
XLOC_001124	0.83	1	0.74	0.7	0.71	0.66	0.81	0.83	0.34	0.14	0.17	0.2	0.29	0.23	0.22	0.26	0.38	0.49	0.22	0.16	0.13	0.22	0.46	0.39	0.24	0.13	0.4	0.28	0.2	0.15	0.51	0.22	0.1	0.47	0.49	0.16	0.42	0.15	0.67	0.24	0.46	0.34	0.13	0.55	0.29	0.5	0.5	0.25	0.37
XLOC_001125	0.03	0	0	0	0	0	0	0	0.2	0.23	0.16	0.12	0.23	0.28	0.2	0.08	0	0.12	0.07	0	0.06	0	0.11	0.11	0.02	0	0.09	0	0	0	0.41	0.08	0	0.02	0.03	0.07	0	0	0.12	0.08	0	0.11	0.09	0.29	0.04	0	0	0	0
XLOC_001126	0.37	0	0	0	0	0	0	0	0	0	0	0	0	0	0	0.04	0	0	0	0	0	0.08	0	0	0	0	0	0.16	0	0	0	0	0.04	0	0	0	0	0.13	0	0	0.03	0.07	0.07	0.31	0.07	0	0.13	0	0
XLOC_001127	0	0	0	0	0	0	0	0	0.04	0	0	0	0	0	0	0	0	0	0	0	0	0	0.05	0	0.11	0	0	0.04	0	0	0.11	0.08	0	0	0	0.8	0	0	0	0	0.15	0.19	0	0	0	0	0	0	0
XLOC_001128	0.07	0.2	0.09	0.2	0.2	0.08	0.24	0.06	0.26	0.27	0.11	0.28	0.3	0.14	0.23	0.13	0.08	0.25	0.04	0.07	0.29	0.02	0.3	0.17	0.17	0.14	0.08	0.1	0.3	0.1	0.19	0.11	0.08	0.31	0.11	0.18	0.25	0.03	0.22	0.16	0.2	0.13	0.09	0.17	0.26	0.03	0.23	0.17	0.18
XLOC_001129	0	0	0	0	0.02	0	0	0	0.82	0.71	1.36	1.27	1.75	1.7	0.82	2.05	2.89	2.23	1.35	1.98	1.39	0.85	0.72	0.78	1.55	0.83	0.59	0.79	1.36	0.62	0.18	0.43	1.21	1.39	0.77	0.84	0.81	0.48	0.7	0.81	1.13	1.01	0.33	0.63	0.96	0.45	0.45	0.61	1.49
XLOC_001130	0	0	0	0	0	0	0.01	0	1.24	1.23	1.44	1.34	1.39	1.68	1.03	2.1	2.7	1.87	1.36	2.05	0.89	1.07	1.19	1.43	1.49	1.24	0.7	0.97	0.49	0.58	0.19	0.44	1.16	0.88	0.63	0.48	0.94	0.8	0.72	0.91	1.16	1.41	0.45	0.75	0.78	0.49	0.12	0.52	1.55
XLOC_001131	0.03	0.06	0.09	0.12	0.15	0.14	0.13	0.1	0.24	0.26	0.43	0.32	0.4	0.33	0.29	0.32	0.29	0.36	0.44	0.37	0.49	0.45	0.55	0.46	0.27	0.29	0.68	0.42	0.54	0.61	0.43	0.3	0.18	0.19	0.29	0.41	0.19	0.32	0.35	0.22	0.29	0.39	0.71	0.78	0.95	0.51	0.7	0.56	0.23
XLOC_001132	0	0.15	0.25	0.67	0.22	0.19	0	0.5	0.42	0.76	1.15	0.6	0.66	0.18	0.14	0.51	0.31	0.29	0.82	0.55	0.4	0.27	0.05	0.19	0.16	0.33	0.26	0.54	0.1	0	0.07	0.48	0.66	0.72	0.94	0.55	0.38	0.49	0.29	0.92	0.17	0.48	0.26	0.43	0.39	0.45	0	0.32	0.21
XLOC_001133	0	0	0	0	0	0	0	0	0	0	0.52	0.04	0.11	0.05	0.05	0	0.65	0.6	0.17	0.65	0.95	0.46	0.77	0.36	1.43	0.35	0.66	0.35	0.24	0.98	0.05	0.08	0.06	0.34	0.27	0.12	0.07	0.48	0.34	0	0	0.32	0.14	0.36	0.02	0.33	1.25	0.43	0.43
XLOC_001134	0.76	0.51	1.23	0.66	1.61	1.61	1.43	1.11	1.34	0.94	0.71	0.66	1.48	1.63	0.63	0.64	0.85	0.68	0.08	0.48	0.14	0.14	0.18	0.03	0.38	0.69	0.09	0.26	0.12	0.25	0	0.14	0.33	0.42	0.11	0.33	0.46	0.08	1.06	0.56	0.06	0	0	0	0.14	0.09	0.21	0.1	0.73
XLOC_001135	0.07	0.1	0.03	0.1	0	0.17	0.04	0.02	0.08	0.03	0.26	0.08	0.07	0.15	0.21	0.22	0.22	0.02	0.1	0	0	0	0.04	0	0.2	0.03	0.05	0.13	0	0.06	0.17	0.09	0.24	0.02	0.41	0.19	0.1	0.25	0.42	0.16	0	0.22	0	0.04	0.06	0	0.33	0.07	0.41
XLOC_001136	1.49	1.85	1.16	1.73	1.18	1.19	1.17	1.25	0.97	1.14	1.07	0.87	0.45	0.76	1.14	1.09	0.72	0.62	0.48	0.62	0.94	0.78	0.88	0.91	0.66	0.65	0.77	0.97	1.16	1.15	1.22	1.25	1.01	1.45	1.55	1.89	1.36	1.59	1.93	1.97	0.73	0.51	0.6	0.88	0.69	1.12	1.38	0.76	0.57
XLOC_001137	0	0	0	0	0	0	0	0	0	0	0	0	0	0	0	0	0	0	0	0	0	0	0	0	0	0	0	0	0	0	0	0	0	0	0	0	0	0	0	0	0	0	0	0	0	0	0	0	0
XLOC_001138	0.08	0.05	0.04	0.2	0	0.06	0.02	0.04	0.1	0.09	0.1	0.68	0.07	0.11	0.26	0.15	0.95	0.23	0.15	0.81	0.18	0.06	0.64	0.34	0.79	0.63	0.11	0.96	0.02	0.13	0.91	0.54	0.4	0.3	0.14	0.64	0.02	0.08	0.41	0.51	1.04	0.23	0.2	1.14	0.03	0.08	0.36	0.32	0.71
XLOC_001139	1.29	1.74	1.7	2.11	1.63	1.58	1.86	2.58	1.87	1.29	1.67	0.78	1.12	0.87	1.24	1.66	3.57	1.75	3.84	2.01	3.35	3.46	2.69	1.81	4.29	2.31	4.1	2.97	2.75	3.27	2.51	2.46	2.59	1.3	1.73	1.05	1.09	2.01	1.61	1.4	2.25	1.6	2.41	1.31	1.5	1.54	1.64	1.22	3.43
XLOC_001140	0.12	0	0.04	0.09	0.06	0	0	0	0	0	0.03	0	0.06	0	0	0.03	0	0	0	0	0	0	0.05	0	0	0	0	0	0.55	0.07	0	0	0	0	0	0	0	0.06	0	0.07	0	0	0	0	0	0.04	0	0	0
XLOC_001141	0.49	0.67	0.21	0.39	0.59	0.4	0.26	0.41	0.17	0.1	0.08	0.15	0.2	0.15	0.04	0.12	0.06	0.11	0.03	0.18	0.16	0.13	0.1	0.04	0.06	0	0	0.18	0	0.06	0.01	0.02	0	0.08	0	0.13	0	0.03	0	0	0.2	0.03	0.01	0.08	0	0.27	0.11	0	0.06
XLOC_001142	0.96	1.21	0.82	0.99	0.06	0.57	0.27	0.63	0	0	0.12	0.16	0.13	0	0.3	0.14	0.18	0.13	0.06	0.23	0.54	0.22	0.24	0.31	0.03	0.26	0.34	0.09	0.15	0.11	0	0.15	0.39	0.13	1.73	1.29	1.08	0.06	1.32	0.34	0.2	0	0.17	0	0	0.18	0.41	0	0.4
XLOC_001143	0.48	0.69	2.86	0.47	7.33	1.81	5.92	4.8	2.55	2.23	5.27	4.17	4.09	8.55	6.3	5.81	0	0.27	0.27	0.26	0.1	0.13	0.55	0.41	0.36	0.41	0.81	0.42	0.23	0.61	1.84	0.89	1.05	1.47	3.57	2.78	4.8	4.83	2.55	7.15	0.03	0.03	0.09	0.11	0.22	0.39	0.98	1.31	0
XLOC_001144	0	0.65	0.46	0.71	1.52	0.39	0.35	0.97	0.15	0.07	0	0.27	0.24	1.23	0.32	1.3	0	0	0	0	0	0.08	0	0	0	0	0.25	0	0	0.23	0	0.08	0	0	0.36	0.38	0	0	0	0.87	0	0	0	0	0.11	0	0	0.17	0
XLOC_001145	2.1	1.03	1.08	1.27	1.74	1.62	1.3	1.03	1.18	1.37	1.15	1.71	1.42	2.27	1.09	0.82	1.17	0.91	0.64	0.89	0.63	0.91	0.9	0.76	1.15	1.28	1.58	1.11	0.91	0.5	0.7	0.25	2.04	1.11	0.93	2.03	0.83	0.69	1.22	0.56	1.39	1.03	1.32	1.03	1.1	2	1.56	1.16	1.37
XLOC_001146	0	0	0	0	0	0	0	0	0	0	0	0	0	0	0	0.09	0	0.06	0	0	0	0	0	0	0	0.44	0	0.08	0	0	0	0	0	0	0	0	0	0	0	0	0	0.13	0	0	0	0	0	0	0
XLOC_001147	0	0	0	0.48	0	0.61	2.74	0.51	0	0	0.02	1.53	0.05	2.79	4.23	0.95	0.01	0.05	0.03	0.96	0.07	1.34	3.95	0.26	0	0.01	0	0.93	0.03	0.9	2.33	0.6	0	0.01	0.02	0.94	0.07	1.8	5.29	0.53	0	0	0.01	0.48	0.02	0.72	3.23	0.52	0
XLOC_001148	0.01	0.02	0.22	0.08	0.06	0.19	0.05	0	0.28	0.1	0.45	0.43	0.18	0.24	0.29	0.22	0.07	0.2	0.25	0.18	0.01	0.12	0.17	0.05	0.07	0.03	0.18	0.22	0.01	0.09	0.09	0.17	0.17	0.35	1.06	0.8	0.39	0.7	0.43	0.57	0.06	0.08	0.06	0.4	0.12	0.09	0.42	0.19	0.05
XLOC_001149	1.04	0	0	0.23	0.06	0.5	0	0.56	0.47	0	0	0.24	0.47	0.55	0	0.77	0.13	0	0.12	0.17	0.05	0.35	0	0.35	0.13	0	0	0.21	0.14	0.41	0	0.11	0.29	0	0.05	0	0.35	0.06	0	0.33	0.29	0	0	0.06	0.17	0.14	0	1.02	0.33
XLOC_001150	0.93	0.82	1.29	0.72	1.54	1.99	0.96	1.95	0.31	0.25	0.18	0.22	0.5	0.58	0.33	0.26	0.14	0.52	0.37	0.2	0.33	0.25	0.42	0.43	0.33	0.3	0.42	0.26	0.33	0.65	0.28	0.22	0.43	0.93	0.21	0.18	0.27	0.24	0.21	0.13	0.23	0.6	0.51	0.38	0.53	0.77	0.79	0.62	0.44
XLOC_001151	3.58	4.63	1.4	4.59	2.91	2.44	4.54	5.99	4.86	4.06	1.83	3.98	4.41	3.86	6.3	6.13	3.09	4.2	1.17	2.4	1.43	1.45	3.07	2.89	3.03	2.85	0.97	2.41	2.13	1.39	2.18	2.92	3.35	3.76	1.15	2.21	1.36	1.44	4.3	2.53	2.2	2.89	1.05	2.53	1.83	1.41	3.22	3.13	2.93
XLOC_001152	0	0	0	0	0	0	0	0	0	0	0	0	0	0	0	0	0	0	0	0	0	0	0	0	0	0	0	0	0	0	0	0	0	0	0	0	0	0	0	0	0	0	0	0	0	0	0	0	0
XLOC_001153	1.42	1.71	1.12	1.34	1.13	1.09	1.89	2.73	1.07	0.91	1.58	1.24	0.87	1.14	1.3	1.35	0.86	1.14	1.52	0.6	0.53	0.41	1.14	1.29	0.66	0.72	1.05	0.92	0.34	0.52	0.92	0.93	0.87	0.71	0.81	0.43	0.56	0.57	1.83	1.62	0.78	1.25	1.08	0.97	1.11	0.27	1.31	2.05	0.74
XLOC_001154	0.81	0.45	0.4	0.46	0.22	1.05	0.45	0.38	1.63	1.34	1.59	0.83	0.47	1.02	0.47	0.78	1.64	1.13	1.02	1.01	0.71	1.44	0.94	0.76	1.55	1.65	0.86	0.81	0.37	1.55	0.83	1.33	1.5	1.17	1.3	0.69	0.6	1.49	0.75	0.69	1.44	0.93	0.98	0.68	0.36	1.25	1.04	0.47	1.44
XLOC_001155	0.82	0.54	0.4	0.53	0.97	1.09	0.52	0.9	0.01	0	0.01	0.02	0	0	0	0.04	0	0	0	0.02	0.04	0.06	0	0.15	0	0	0.01	0	0	0.16	0	0.06	0.11	0.01	0.06	0.02	0.02	0.15	0	0	0	0	0	0	0.01	0.09	0.01	0.12	0
XLOC_001156	0	0.02	0	0	0	0	0.05	0	0.04	0.05	0.05	0.04	0.04	0.08	0.04	0.02	0.04	0	0.05	0.07	0.02	0	0.04	0.11	0.21	0	0.1	0	0	0.06	0.01	0.07	0.17	0.04	0.13	0.14	0.09	0.13	0.06	0.1	0.33	0.42	0.61	0.15	0.28	0.19	0.1	0.25	0.04
XLOC_001157	0.23	0	0.13	0.14	0.06	0	0.11	0.21	0.24	0.09	0.12	0	0.09	0.07	0.32	0.1	0.27	0.04	0	0.06	0.05	0.07	0	0	0	0.26	0.29	0	0	0	0.22	0.14	0	0.39	0.11	0.11	0	0	0.27	0.13	0.39	0.86	1.27	0.32	0.21	0.14	0.24	0.75	0.07
XLOC_001158	0.02	0	0	0	0	0	0	0	0.08	0	0.09	0.07	0.27	0.04	0.06	0	0.01	0.03	0.04	0	0.05	0.04	0	0.03	0	0.08	0.16	0	0.09	0.01	0	0.11	0.16	0.01	0.17	0.11	0	0.13	0	0.04	0.06	0	0	0.01	0	0.11	0.02	0.07	0.15
XLOC_001159	0.76	0.83	1.04	1.68	0.81	1.59	1.34	1.61	0.32	0.47	0.71	1.48	1	0.99	0.77	0.61	0.15	0.44	0.78	1.21	0.96	0.24	0.37	0.25	0.15	0.31	0.38	1.41	0.66	0.22	0.1	0.13	0.18	0.36	0.35	0.62	0.32	0.19	0.28	0.11	0.09	0.53	0.74	1.15	0.68	0.14	0.15	0.07	0.2
XLOC_001160	0	0	0	0	0	0	0	0	0	0	0	0	0	0	0	0	0	0	0	0	0	0	0	0	0	0	0	0	0	0	0	0	0	0	0	0	0	0	0	0	0	0	0	0	0	0	0	0	0
XLOC_001161	0.83	1.67	1.42	0.74	0.8	1.22	1.76	1.33	0.24	0.28	0.24	0.13	0.4	0.42	0.45	0.37	0.12	0.4	0.15	0.14	0.26	0.26	0.38	0.32	0.19	0.25	0.32	0.15	0.27	0.2	0.22	0.22	0.22	0.34	0.21	0.18	0.07	0.37	0.53	0.13	0.32	0.42	0.26	0.17	0.26	0.44	0.4	0.37	0.25
XLOC_001162	0.31	0.31	0.89	0.52	0.14	0.23	0.6	0.28	0.04	0.25	0.09	0.04	0.09	0	0.05	0.08	0.04	0.29	0	0	0.11	0.06	0.08	0.04	0	0	0.05	0	0.12	0.13	0	0.03	0.02	0.11	0	0	0	0.2	0.03	0.05	0.04	0.04	0.16	0	0	0	0.05	0.03	0
XLOC_001163	0.04	0.01	0.03	0.03	0.01	0.02	0.01	0	0.02	0	0	0.03	0.01	0.01	0.03	0.04	0.01	0.01	0.01	0.01	0.02	0.02	0	0.01	0	0	0	0	0	0	0.01	0	0	0	0	0	0.02	0.01	0.02	0	0.03	0.01	0	0.01	0	0	0	0	0
XLOC_001164	0	0	0	0.44	0.12	0.05	0	0.17	0	0	0.1	0	0	0	0	0	0	0	0	0	0.06	0	0	0	0	0	0	0	0	0	0	0	0	0	0.18	0	0.16	0	0	0	0	0	0	0	0	0	0	0	0
XLOC_001165	2.97	3.35	1.54	2.72	3.07	1.53	1.92	2.03	2.6	2.27	3.96	2.54	1.61	1.92	1.38	1.96	8.53	6.47	5.8	7	6.18	3.87	4.44	5.31	6.28	9.47	3.05	6.67	4.78	3.08	2.85	2.11	7.25	7.45	3.32	6.99	2.96	4.42	2.72	4.71	5.66	5.05	1.58	2.95	3.43	2.2	2.9	3.04	8.88
XLOC_001166	0.53	0.81	0.67	0.31	0.32	0.79	0.61	0.38	0.07	0.09	0.13	0.06	0.1	0.23	0.25	0.03	0	0.03	0.18	0.12	0.04	0.07	0.19	0.09	0.03	0.08	0.31	0.05	0.07	0.43	0.05	0.1	0.03	0.12	0.11	0	0.01	0.19	0.24	0.15	0.01	0.07	0.18	0.1	0.06	0.16	0.23	0.09	0.05
XLOC_001167	0	0.03	0.02	0.04	0	0	0	0.08	0.05	0.02	0.08	0.17	0.25	0.17	0.03	0.16	0.05	0.29	0.12	0.13	0.31	0	0.04	0.02	0.22	0.18	0	0	0.31	0.16	0.02	0.06	0.23	0.32	0.13	0.25	0.39	0.26	0.05	0.31	0.08	0.22	0.03	0.33	0.04	0.01	0	0	0.08
XLOC_001168	0.66	0.24	0.32	0.47	0.48	0.54	0.55	0.53	0.34	0.32	0.3	0.21	0.25	0.39	0.27	0.21	0.33	0.24	0.36	0.29	0.38	0.36	0.44	0.25	0.19	0.35	0.36	0.24	0.47	0.42	0.79	0.26	0.41	0.15	0.2	0.38	0.35	0.18	0.22	0.3	0.32	0.38	0.16	0.3	0.53	0.3	0.13	0.31	0.25
XLOC_001169	0.29	0.27	0.1	0.41	0.2	0.06	0.31	0.08	0.1	0.06	0.01	0.13	0.17	0.19	0.07	0.13	0.03	0.11	0.05	0.02	0.16	0.11	0.16	0.08	0	0.02	0.03	0.14	0.1	0.12	0.14	0.03	0.29	0.1	0.17	0.15	0.17	0.07	0.03	0	0.11	0.21	0.06	0.1	0.4	0.2	0.24	0.06	0
XLOC_001170	0.21	0.46	0.53	0	0.78	0.82	0.63	0.98	0.09	0.11	0.82	0.03	0.85	0.42	0.41	0.76	0.04	0.08	0.53	0	0.81	1.41	0.42	0.72	0.21	0.14	0.3	0	1.05	0.63	0.23	0.78	0.11	0.19	0.34	0	0.59	0.71	0.31	0.53	0.17	0.12	0.65	0	0.62	0.67	0.25	1.32	0.42
XLOC_001171	0.88	0.89	0.54	0.49	0.82	0.91	1.33	0.78	0.13	0.16	0.27	0.12	0.31	0.3	0.24	0.13	0.2	0.22	0.09	0.17	0.32	0.32	0.28	0.34	0.3	0.17	0.15	0.21	0.16	0.31	0.19	0.13	0.16	0.32	0.04	0.04	0.23	0.23	0.51	0.4	0.1	0.24	0.15	0.31	0.36	0.08	0.27	0.21	0.15
XLOC_001172	0.34	0.73	0.6	0.68	0.68	0.86	1.04	0.72	0.12	0.12	0.24	0.05	0.18	0.11	0.11	0.05	0.11	0.11	0.18	0.11	0.09	0.12	0.27	0.12	0.12	0.06	0.09	0.15	0.2	0.12	0.09	0.08	0.1	0.13	0.3	0.12	0.13	0.15	0.27	0.05	0.26	0.19	0.19	0.21	0.25	0.08	0.19	0.13	0.15
XLOC_001173	0.27	0.43	0.31	0.44	0.28	0.3	0.14	0.49	0.69	0.89	0.74	0.71	0.43	1.07	0.58	0.72	0.7	0.7	0.92	0.9	0.92	0.69	0.56	0.85	0.47	0.59	0.63	1	0.33	0.64	0.6	0.51	1.03	0.99	1.07	1.27	1.05	1.26	1.07	1.32	1.87	1.44	1.73	1.49	1.59	1.5	1.16	1.97	0.84
XLOC_001174	0.06	0.17	0.12	0.11	0.09	0.07	0.03	0.23	0.25	0.26	0.25	0.36	0.27	0.36	0.4	0.25	0.22	0.47	0.6	0.28	0.42	0.54	0.48	0.68	0.64	0.4	0.75	0.6	0.19	0.25	0.46	0.21	1.34	1.34	0.33	0.95	0.55	0.61	0.48	0.49	1.24	0.85	0.55	0.74	0.65	0.49	0.9	0.9	0.36
XLOC_001175	0	0.18	0.06	0.1	0.09	0.08	0.04	0.19	0.08	0.11	0	0.16	0.09	0.1	0.14	0.13	0.07	0.31	0.13	0.42	0.35	0.11	0.66	0.52	0.07	0.43	0.24	0.09	0.05	0.31	0	0.51	0.19	0.64	0.33	0	0.07	0.14	0.5	0.29	0.5	0.57	0.54	0.13	0.21	0.21	0.21	1.15	0.25
XLOC_001176	0.05	0.31	0.33	0.55	0.68	0.68	0.31	0.17	0.42	0.3	0.6	0.37	0.31	0.19	0.37	0.55	0.31	0.34	0.24	0.37	0.33	0.38	0.86	0.41	0.62	0.39	0.22	0.27	0.4	0.6	0.17	1.21	0.57	0.98	0.43	0.49	0.41	0.67	0.56	0.41	1.11	0.79	0.28	0.51	0.99	1.24	1.11	1.01	0.27
XLOC_001177	0.94	0.68	0.17	0.3	0.05	0.21	0.4	0.21	0.83	0.81	0.35	0.57	0.23	0.33	0.23	0.44	0.57	0.63	0.32	0.61	0.09	0.18	0.27	0.06	0.3	0.16	0.26	0.06	0.04	0.2	0.05	0.1	0.66	0.66	0.34	0.21	0.02	0.55	0.22	0.16	0.28	0.42	0.16	0.16	0.13	0.23	0.33	0.13	0.38
XLOC_001178	4.35	4.27	3.04	2.72	3.26	3.44	2.3	4.1	0.46	0.86	0.55	0.43	0.86	0.65	1.04	0.5	0.57	0.56	0.79	0.6	0.48	0.55	0.91	0.56	0.44	0.63	0.62	0.55	0.33	0.59	0.09	0.25	0.98	1	0.81	0.88	0.42	0.17	0.95	1.3	0.56	0.63	0.39	0.87	1.07	1.36	0.92	1.06	0.46
XLOC_001179	0.5	0.56	0.25	0.48	0.79	0.51	0.6	0.37	0.94	1.49	0.63	1.24	1.39	1.22	1.25	1.4	0.19	0.23	0.39	0.34	0.53	0.24	0.48	0.32	0.24	0.32	0.36	0.31	0.45	0.38	0.6	0.49	0.22	0.47	0.6	0.64	0.91	1.28	0.89	1.56	0.21	0.24	0.2	0.34	0.57	0.46	0.76	0.25	0.29
XLOC_001180	0.03	0.04	0	0	0	0.05	0	0.03	0.13	0.26	0.08	0.26	0.1	0.23	0.1	0.23	0.45	0.11	0.16	0.18	0.25	0.15	0.3	0.03	0.1	0.03	0.16	0.14	0	0.11	0.25	0	0.04	0.21	0.12	0	0	0.06	0	0.07	0.02	0.25	0.31	0.06	0.24	0.06	0.86	0.57	0.24
XLOC_001181	0	0	0.08	0	0.06	0.2	0	0.03	0.02	0.06	0	0.02	0.02	0.06	0.06	0.13	0.07	0.14	0	0	0.26	0.14	0.18	0.1	0	0.33	0.02	0.1	0.16	0.19	0.02	0.05	0.12	0.11	0	0	0	0.09	0	0.06	0.42	0.06	0.88	0.22	0.86	0.46	0.89	0.5	0.16
XLOC_001182	0	0	0.04	0	0	0	0.05	0	0	0	0	0	0	0	0	0	0.04	0	0	0.11	0.26	0	0	0.15	0	0	0	0	0	0.03	0	0	0	0	0	0	0	0	0	0	0	0	0	0.09	0	0	0	0	0
XLOC_001183	0	0	0	0	0	0	0	0	0.17	0.06	0	0	0.03	0	0	0.03	0.04	0	0.17	0	0	0	0	0.05	0.03	0.03	0	0.18	0	0.34	0	0	0.04	0	0	0	0	0	0	0.06	0	0	0	0	0	0	0	0	0
XLOC_001184	0.7	0.59	0.69	0.34	0.56	0.58	0.48	0.68	1.8	2.11	1.72	1.55	1.61	1.68	1.63	1.19	5.77	7.4	4.81	4.6	3.94	4.59	4.74	4.17	5.5	6.64	4.74	5.26	4.88	4.13	4.81	3.42	1.89	2.21	1.41	1.24	1.8	1.97	2.15	1.55	3.8	4.04	1.86	1.85	1.98	1.75	1.47	1.69	6.05
XLOC_001185	0.1	0.16	0.07	0.08	0	0	0	0.13	0	0	0.13	0.05	0	0	0.05	0	0	0	0.15	0.14	0	0	0	0	0.03	0.11	0.14	0	0	0.06	0	0.15	0.39	0	0	0.1	0.04	0.4	0.11	0	0.03	0.05	0	0.02	0.09	0	0	0.1	0.11
XLOC_001186	3.05	4.14	3.85	3.59	2.91	3.91	2.8	4.06	1.69	1.84	2.04	1.22	1.41	1.62	2.55	1.85	1.07	1.68	1.19	0.49	0.75	1.43	0.88	1.19	1.24	1.31	1.87	1.12	0.79	0.77	0.9	0.39	1.28	1.68	2.22	0.94	0.97	1.55	2.04	1.15	1.34	0.91	2.21	0.93	0.41	1.51	0.99	0.58	1.2
XLOC_001187	0.95	0.87	0.51	0.71	0.51	0.66	1.35	0.67	0.25	0.27	0.25	0.2	0.03	0.21	0.21	0.22	0.18	0.34	0.29	0.09	0.13	0.23	0.15	0.04	0.03	0.21	0.16	0.05	0.21	0.4	0.1	0	0.24	0.11	0.53	0.23	0	0.2	0.16	0.16	0.1	0	0.21	0.02	0	0	0.16	0.19	0.16
XLOC_001188	0	0.07	0.04	0	0	0	0	0.05	0.19	0.42	0.58	0.11	0.09	0.09	0.03	0.06	0.04	0.15	0.43	0.16	0.1	0.26	0.38	0.09	0.09	0.38	0.36	0.03	0.1	0.51	0.11	0.26	0.12	0	0.1	0.05	0	0	0.12	0.06	0.15	0.06	0.21	0	0.79	0.19	0.51	0.43	0.36
XLOC_001189	2.84	1.95	1.64	1.97	3.36	3.01	2.76	3.26	0.61	0.77	1.02	0.78	0.56	0.76	0.84	0.65	0.7	0.42	0.39	0.44	0.63	0.58	0.71	0.69	0.52	0.56	0.85	0.93	0.8	0.52	1.08	0.4	0.89	0.55	0.73	0.66	0.54	0.51	0.7	0.63	0.91	0.78	1.15	0.73	1.21	0.9	0.96	1.06	0.39
XLOC_001190	0.17	0.02	0.12	0.02	0.11	0.25	0.16	0	0.22	0.11	0.15	0.08	0.26	0.11	0.26	0.35	0	0	0	0.03	0	0	0	0	0	0	0.03	0	0	0.02	0	0	0.08	0.15	0.3	0.06	0.77	0.09	0.47	0.75	0	0	0	0	0.03	0	0.04	0	0
XLOC_001191	0.74	1.56	0.81	1.47	1.54	0.94	0.48	1	0.94	1.21	0.47	0.55	0.47	0.42	0.65	0.45	0.4	0.84	0.13	0.46	0.35	0.42	0.69	0.48	0.44	0.43	0.29	0.43	0.3	0.65	0.47	0.72	0.66	0.61	0.49	0.3	0.93	0.94	0.4	0.2	0.53	0.71	0.1	0.66	0.18	0.31	0.53	0.44	0.24
XLOC_001192	0	0.03	0.09	0	0.09	0.11	0.08	0	0.15	0.25	1.28	0.6	0.43	0.89	0.27	0.41	0.61	0.41	0.44	0.3	0.44	0.11	0.73	0.6	0.32	0.22	0.59	0.32	0.47	0.24	0.14	0.16	0	0	0	0.51	0.15	0.23	0	0.2	0	0	0.02	0	0.05	0	0	0.03	0.45
XLOC_001193	1.14	1.17	1.13	1.08	1.29	0.98	1.06	1.25	0.58	0.45	0.59	0.41	0.65	0.74	0.52	0.52	0.32	0.72	0.66	0.4	0.41	0.38	0.49	0.59	0.61	0.63	0.71	0.41	0.5	0.64	0.3	0.43	0.6	0.98	0.83	0.63	0.43	0.8	0.47	0.44	0.7	0.62	0.8	0.5	0.86	0.56	0.4	0.63	0.64
XLOC_001194	0.04	0.06	0.09	0	0.25	0.26	0	0.11	2.63	2.45	1.87	3.73	4.52	4.18	2.1	2.45	0.49	0.76	0.17	0.04	0.19	0.16	0.07	0.18	0.02	0.26	0	0.31	0.24	0	0.05	0.08	0.28	0.35	0.44	1.34	2.43	1.28	1.83	0.63	0.16	1.26	0.17	0.41	0.46	0.1	0.55	0.26	0.19
XLOC_001195	0	0	0.04	0	0	0	0	0	0.15	0.32	0.51	0.03	0	0.03	0.03	0.18	0	0.13	0.13	0.06	0.06	0.08	0.1	0	0.03	0	0.17	0.35	0.31	0	0	0	0	0.55	0.17	0.12	0.16	0.13	0	0.07	0	0.07	0	0	0.04	0	0	0	0.07
XLOC_001196	0	0.21	0.13	0.07	0.04	0.04	0.04	0	0	0	0.16	0	0.05	0	0.1	0.03	0	0.23	0	0	0	0	0	0.04	0	0.02	0	0.05	0	0	0.05	0	0	0	0	0.09	0	0	0	0.05	0.05	0	0.05	0	0	0	0.12	0	0
XLOC_001197	0.28	0.29	0.12	0.54	0.27	0.52	0.26	0.68	0.26	0.11	0.21	0.2	0.19	0.16	0.27	0.21	0.05	0	0.15	0.13	0.08	0.13	0.07	0.17	0.16	0	0.02	0.01	0.09	0.31	0.02	0.44	0.14	0.06	0.02	0.32	0.15	0.38	0.3	0.46	0.39	0.07	0.13	0.16	0.17	0.3	0.19	0.29	0.22
XLOC_001198	0	0	0	0	0	0	0	0	0	0.03	0.07	0	0	0	0	0	0	0.1	0.03	0.06	0	0.07	0	0.3	0	0	0	0	0	0	0.06	0	0	0.02	0.05	0	0	0	0	0	0.05	0	0	0	0	0	0	0	0.03
XLOC_001199	0	0	0	0.02	0.02	0.07	0.02	0.02	0.29	0.19	0.45	0.39	0.97	0.69	0.36	0.58	0.25	0.34	0.26	0.28	0.31	0.26	0.33	0.33	0.29	0.28	0.31	0.25	0.17	0.12	0.1	0.11	0.3	0.17	0.17	0.17	0.33	0.22	0.19	0.29	0.07	0.05	0.01	0.06	0.02	0.05	0	0.02	0.36
XLOC_001200	0.05	0.13	0.1	0.13	0.19	0.28	0.2	0.22	0.08	0.16	0.13	0.16	0.13	0.05	0.15	0.33	0.08	0.18	0.19	0.21	0.15	0.2	0.22	0.28	0.21	0.25	0.29	0.18	0.31	0.29	0.07	0.32	0.2	0.14	0.28	0.29	0.14	0.06	0.13	0.43	0	0.07	0.2	0.28	0.39	0.18	0.09	0.22	0.03
XLOC_001201	4.93	5.43	4.74	5.1	4.35	4.22	4.62	5.83	2.81	3.68	2.3	2.92	4.21	5.24	5.94	3.76	4.05	3.85	3.87	2.83	2.55	3.14	2.86	3.87	4.21	8.2	3.68	2.68	4	3.33	3.27	3.39	8.68	9.08	3.62	3.83	3.01	3.43	3.26	3.07	7.95	6.74	7.1	5.12	5	6.14	6.23	5.19	3.8
XLOC_001202	0.75	0.7	0.52	0.8	0.61	0.18	0.9	0.69	0.09	0.15	0.28	0.27	0.14	0.23	0.23	0.31	0.28	0.11	0.26	0	0.21	0.16	0.02	0.33	0.06	0.16	0.16	0.16	0.08	0.15	0.15	0.02	0.07	0.1	0.15	0.18	0.02	0.29	0.27	0.7	0.04	0.09	0.13	0.12	0.14	0.06	0.14	0.07	0.12
XLOC_001203	0	0	0	0	0	0	0.14	0	0	0	0	0	0	0	0.06	0	0.09	0	0.19	0.11	0.24	0.05	0.3	0.13	0	0	0	0	0.21	0	0.1	0	0	0	0.04	0	0	0	0	0	0	0.02	0	0	0.09	0	0	0	0
XLOC_001204	0.93	0.57	0.65	0.5	0.44	1.04	0.56	0.56	1	0.57	0.96	0.96	1.18	1.12	1.43	0.98	0.76	0.68	1.13	0.66	0.97	0.56	1.04	0.85	1.04	0.9	1.08	0.46	1.12	0.89	0.68	0.63	1.02	1.19	0.93	0.52	0.87	1.46	1.54	1.17	0.94	1.51	1.19	0.77	1.17	1.02	0.67	0.87	1.33
XLOC_001205	0.04	0.17	0	0	0	0	0	0	0	0.02	0	0.03	0.02	0.02	0	0.02	0.1	0.16	0	0.04	0.02	0.15	0	0.07	0.09	0.03	0	0.09	0.1	0	0.16	0	0.02	0.09	0.02	0	0.04	0.13	0.02	0	0.05	0	0.04	0	0	0	0	0	0.05
XLOC_001206	0	0.13	0.02	0.07	0.23	0.31	0.08	0.11	0.14	0.33	0.21	0.31	0.13	0.55	0.09	0.15	0.13	0.53	0.21	0.1	0.06	0.46	0.03	0.09	0.06	0.32	0.07	0.13	0.07	0.33	0	0.25	0.12	0.19	0	0.12	0.24	0.46	0.05	0.19	0.24	0.2	0.07	0.02	0.1	0.33	0.11	0.11	0.26
XLOC_001207	0.19	0.21	0.17	0.17	0.18	0.2	0.18	0.18	2.71	2.72	2.73	3.12	3.27	3.85	2.95	3.07	2.95	3.17	3.35	3.45	3.18	4.55	4.49	4.02	3.02	2.85	2.96	2.73	2.43	3.46	2.9	3	3.13	3.12	2.67	2.48	2.32	3.52	3.33	2.11	2.95	2.67	1.95	2.27	2.52	2.88	2.98	2.45	2.64
XLOC_001208	0	0	0	0	0	0	0	0	0	0	0	0	0	0	0	0	0	0	0	0	0	0	0	0	0	0	0	0	0	0	0	0	0	0	0	0	0	0	0	0	0	0	0	0	0	0	0	0	0
XLOC_001209	0	0	0	0	0	0	0	0	0	0	0	0	0	0	0	0	0	0	0	0	0	0	0	0	0	0	0	0	0	0	0	0	0	0	0	0	0	0	0	0	0	0	0	0	0	0	0	0	0
XLOC_001210	0	0.07	0	0	0	0	0	0.05	0	0.06	0.11	0.03	0.12	0.03	0.06	0.09	0.12	0.04	0	0	0	0	0	0.09	0	0.12	0.6	0.53	0.07	0.32	0	0	0.04	0	0	0.05	0	0.11	0	0	0.06	0.03	0.03	0.16	0.03	0.13	0	0	0.12
XLOC_001211	0.21	0.21	0.09	0.26	0.17	0.17	0.35	0.15	0.3	0.41	0.2	0.39	0.18	0.19	0.31	0.42	0.25	0.2	0.32	0.23	0.23	0.31	0.28	0.21	0.26	0.26	0.11	0.25	0.22	0.28	0.4	0.28	0.29	0.19	0.38	0.4	0.22	0.48	0.39	0.19	0.35	0.21	0.27	0.25	0.24	0.19	0.36	0.44	0.34
XLOC_001212	0	0	0	0	0	0	0	0	0.06	0.1	0.27	0.26	0.23	0.39	0.31	0.35	0.09	0.12	0.17	0.21	0.11	0.18	0.25	0.31	0.15	0.09	0.3	0.14	0.15	0.44	0.29	0.15	0.2	0.15	0.64	0.02	0.02	0	0.17	0.03	0.35	0.28	0.32	0.16	0.28	0.32	0.2	0.32	0.25
XLOC_001213	0	0	0	0	0	0	0.05	0.03	0.05	0.02	0.11	0.13	0.32	0.15	0.13	0.22	0.07	0.06	0.24	0.14	0.13	0.22	0.02	0.05	0.05	0.1	0.12	0.14	0.15	0.23	0.34	0.07	0.04	0.13	0.06	0.06	0.15	0	0.03	0.27	0.16	0.23	0.13	0.06	0.05	0.04	0.1	0.12	0.2
XLOC_001214	0.04	0.04	0.02	0.03	0.03	0	0.04	0	0.44	0.63	0.92	0.64	0.95	0.99	0.6	0.62	0.55	0.64	1.38	0.89	0.61	0.8	0.54	0.7	0.54	0.71	1.26	0.76	0.42	0.44	0.41	0.7	1.03	1.16	0.67	0.34	0.24	0.29	0.69	0.26	0.69	0.8	1.25	1.06	0.86	0.67	0.73	0.57	0.64
XLOC_001215	0.05	0	0.14	0	0.05	0	0	0	0	0	0	0	0	0	0	0	0.04	0	0.05	0	0	0	0	0	0	0.45	0.03	0	0	0	0	0.09	0	0	0	0	0	0.15	0.11	0	0	0	0.03	0	0	0.03	0.03	0.07	0
XLOC_001216	79.62	82.42	73.18	95.63	99.67	113.86	92.77	100.74	93.99	89.61	92.17	84.62	66.93	66.83	63.26	78.8	92.47	68.75	118.54	102.84	120.04	118.94	126.2	110.27	70.61	61.77	69.06	89.17	88.77	81.92	110.32	96.71	63.55	61.45	77.69	66.33	68.98	74.72	73.8	72.94	84.74	84.24	103.85	101.93	100.7	99.14	111.87	105.38	88.85
XLOC_001217	0.9	1.25	0.87	0.73	1.33	1.54	1.37	1.16	0.85	1.12	1.15	0.67	0.76	0.99	0.91	1.09	1.04	0.99	1.35	0.91	1.22	1.59	1.65	1.29	0.99	1.24	0.85	0.86	1.4	1.32	1.5	1.14	0.99	1.34	1.15	1.08	1.13	1.5	1.47	1.19	1.05	1.11	1.15	1.04	1.32	1.35	1.59	1.34	0.99
XLOC_001218	0.05	0.39	0.31	0.19	0.09	0.12	0.44	0.21	0.25	0.53	0.3	0.1	0.28	0.38	0.13	0.39	0	0.24	0.29	0.05	0	0	0.08	0	0	0.16	0.05	0	0	0.11	0	0.21	0	0.46	0.04	0.19	0.08	0	0.17	0.59	0.11	0	0	0	0	0.17	0.06	0.03	0
XLOC_001219	1.89	3.67	2.51	3.83	3.07	4.94	2.87	2.53	1.38	1.24	1.52	1.95	2.76	3.51	2.79	1.65	0.72	0.97	0.37	0.58	1.57	1.74	1.27	1.08	0.78	1.04	0.84	0.57	1.31	1.88	0.55	0.92	0.65	2.34	1.74	0.55	0.57	1.41	1.35	0.98	1.03	0.66	1.14	0.67	1.26	1.34	2.12	1.46	0.53
XLOC_001220	1.34	1.41	1.87	2.36	2.05	2.46	3.32	1.94	3.36	3.42	1.96	3.14	2.5	2.33	2.7	2.16	1.33	0.84	0.79	1.17	1.18	1.15	1.26	1.36	1.07	0.97	0.69	1.24	1.09	0.73	0.98	0.59	0.79	1.03	1.61	2.26	2.63	2.61	3.36	2.27	0.1	0.15	0.32	0.47	0.31	0.36	0.4	0.33	0.89
XLOC_001221	7.9	6.99	7.08	8.54	6.47	9.1	6.05	6.96	7.89	7.39	9.28	6.08	4.85	7.56	4.6	5.57	10.93	6.23	9.82	8.36	8.22	10.83	9.48	8.9	9.18	3.84	7.26	6.11	4.91	6.66	6.02	5.23	6.8	5.29	7.29	5.39	5.81	9.64	6.02	5.4	10.45	5.28	7.47	7.32	7.74	7.34	6.68	6.7	8.4
XLOC_001222	0.69	0.49	0.45	0.46	0.64	0.62	0.54	0.55	0.99	1.08	0.96	0.85	0.71	0.93	0.78	1.11	1.25	0.81	1.01	1.3	0.62	1	1.15	1.18	0.31	0.34	0.64	0.46	0.6	0.68	1.07	0.55	0.27	0.61	0.45	0.37	0.71	0.25	0.48	1.05	0.64	0.28	0.44	0.49	0.51	0.56	0.42	0.33	0.62
XLOC_001223	0.92	0.74	0.88	0.55	1.37	1.06	0.72	2.08	0.61	0.41	0.39	0.69	0.26	0.35	0.19	0.45	0.61	0.28	0.53	0.81	0.91	0.64	0.52	1.12	1.05	0.38	0.59	0.7	1.03	0.78	0.7	0.64	0.73	0.19	0.9	0.51	0.56	0.63	0.25	0.84	0.7	0.98	1.22	0.66	0.7	1.05	0.77	1.45	0.84
XLOC_001224	0	0.11	0.06	0.08	0.08	0	0.04	0.07	0.23	0.21	0.11	0.13	0.25	0.17	0.13	0.21	0.28	0.36	0.45	0.16	0.29	0.2	0.08	0.09	0.31	0.23	0.18	0.15	0.07	0.38	0.16	0.08	0.06	0.08	0.08	0.21	0.13	0.33	0.22	0.17	0.09	0.16	0.14	0.04	0.11	0.06	0.17	0.04	0.05
XLOC_001225	1.55	1.56	1.33	1.61	1.2	0.93	0.85	1.78	0.74	0.95	0.66	0.46	1.2	1.66	1.02	0.8	0.71	1.33	0.47	0.96	0.99	1.12	0.82	0.77	0.86	0.83	0.8	0.79	0.51	0.84	0.57	1.17	1.61	1.7	0.51	1.07	0.36	1.04	0.93	0.4	2.37	1.13	0.94	1	1.34	1.75	1.07	0.84	1.21
XLOC_001226	0.13	0	0	0	0	0	0	0	0	0.04	0	0.04	0	0.11	0	0.12	0	0.1	0	0	0	0	0	0.06	0	0.11	0.07	0.07	0	0.4	0	0	0.05	0	0.12	0	0	0	0	0	0.04	0	0	0	0	0	0	0.05	0
XLOC_001227	0	0.17	0	0.23	0	0.15	0.08	0.19	0.1	0.2	0.42	0.18	0.05	0.12	0.23	0.02	0.19	0	0.55	0.04	0.19	0.2	0.23	0.14	0.05	0	0.24	0.02	0.13	0.03	0.09	0.05	0.09	0.22	0.28	0.08	0	0.09	0.15	0.47	0.35	0.07	0.02	0.19	0	0.2	0.06	0.34	0.09
XLOC_001228	0.68	0.8	0.62	0.72	0.46	0.55	0.66	0.59	0.89	0.98	0.99	1.12	0.76	1.27	1.15	0.78	0.65	0.52	0.56	0.98	0.53	0.88	0.81	0.5	0.68	0.48	0.68	0.92	0.54	0.95	1.03	0.45	0.69	1.18	1.49	1.65	0.89	1.88	1.18	0.96	0.91	0.54	0.48	0.8	0.58	1.04	0.72	0.58	0.67
XLOC_001229	3.32	4.67	1.71	3.13	4.81	7	7.34	5.5	3.56	6	1.82	2.07	3.64	3.64	3.88	3.93	2.38	2.91	3.09	3.12	4.33	6.87	6.59	4.64	2.32	3.35	2.05	2.35	4.09	3.53	6.01	3.56	2.73	3.35	2.43	3.21	3.66	7.02	5.37	6	2.95	3.8	2.03	3.31	4.58	5.08	6.04	5.11	2.93
XLOC_001230	0	0	0	0	0	0	0	0	0	0	0.02	0	0	0	0	0	0.1	0	0.13	0.06	0.06	0.08	0.25	0.19	0.1	0	0.1	0.19	0.08	0.18	0.03	0.09	0	0	0	0	0	0	0	0.21	0.14	0.15	0.07	0.03	0.2	0.15	0.29	0.04	0.07
XLOC_001231	0	0	0.13	0.03	0	0.04	0	0.12	0.26	0.23	0.18	0.16	0.07	0.12	0.05	0.13	0.27	0	0.44	0.3	0.39	0.26	0.42	0.11	0.22	0.1	0.29	0.52	0.05	0.13	0.14	0.29	0.28	0.06	0	0.17	0	0.05	0	0.2	0.02	0.05	0.05	0.07	0.21	0.13	0.18	0.09	0.1
XLOC_001232	0	0	0	0.09	0	0	0.04	0	0.58	0.27	0.14	0.52	0.21	0.13	0.31	0.09	0.74	0.74	0.32	0.89	0.83	0	0.88	0.27	0.58	0.81	0.04	0.52	0.1	0.09	0.3	0.1	0.34	0.59	0.48	1.01	1.88	0.16	1.75	0.58	0.11	0.35	0.09	0.2	0.24	0.02	0.43	0	0.63
XLOC_001233	0.31	0.35	0.24	0.4	0.28	0.33	0.61	0.14	1.16	1.21	1.19	1.43	1.75	1.6	1.7	1.07	2.26	2.42	2.46	3.3	2.33	1.67	3.92	1.87	1.27	1.49	1.46	2.71	2.17	1.34	2.28	1.33	1.04	1.19	1.26	1.58	1.34	1.4	1.95	1.08	0.73	1.07	1.07	1.2	1.85	0.9	1.55	0.97	1.59
XLOC_001234	0	0	0	0	0	0	0	0	0	0	0	0	0	0	0	0	0	0	0	0	0	0	0	0	0	0	0	0	0	0	0	0	0	0	0	0	0	0	0	0	0	0	0	0	0	0	0	0	0
XLOC_001235	0	0	0	0	0.15	0.07	0.07	0.07	0.05	0	0.08	0.04	0.04	0	0.09	0.14	0	0	0	0.15	0	0	0	0.07	0	0	0	0	0.2	0	0.3	0	0.06	0	0.15	0.08	0	0	0	0	0.13	0.13	0	0.52	0.19	0	0.05	0.21	0.18
XLOC_001236	1.08	0.75	1.58	0.86	1.48	1.21	1.14	1.34	3.09	2.9	3.85	2.07	2.57	1.84	2.97	2.59	3.53	2.93	3.94	2.78	3.74	2.15	4.03	2.27	2.29	1.64	2.37	2.6	3	1.39	4.27	2.56	2.42	1.99	2.22	1.18	2.33	2.04	2.49	1.65	3.46	3.28	3.93	3.58	3.16	2.02	3.24	3.02	2.82
XLOC_001237	0.19	0.05	0.25	0.12	0.15	0.29	0.1	0.17	0.24	0.1	0.16	0.38	0.02	0.19	0.15	0.2	0.09	0.24	0.15	0.22	0.24	0.14	0.15	0.42	0.19	0	0.13	0.2	0.24	0	0.28	0.37	0.11	0.22	0.11	0.22	0	0.12	0.09	0.17	0.42	0.27	0.3	0.48	0.07	0.39	0.54	0.62	0.21
XLOC_001238	0.01	0.55	0.01	0.01	0	0	0.03	0.03	0.21	0.74	0.03	0.05	0.01	0	0	0.07	0.46	1.53	0.16	0.11	0.2	0.17	0.15	0.06	0.37	1.35	0.11	0.13	0.13	0.06	0.13	0.05	0.28	1.36	0.05	0.07	0.03	0.02	0.04	0.02	0.51	1.32	0.11	0.1	0.06	0.06	0.08	0.28	0.32
XLOC_001239	0	0	0	0	0	0	0	0	0	0	0	0	0	0	0	0	0	0	0	0	0	0	0	0	0	0	0	0	0	0	0	0	0	0	0	0	0	0	0	0	0	0	0	0	0	0	0	0	0
XLOC_001240	0	0	0	0	0	0	0	0	0	0	0	0	0	0	0	0	0	0	0	0	0	0	0	0	0	0	0	0	0	0	0	0	0	0	0	0	0	0	0	0	0	0	0	0	0	0	0	0	0
XLOC_001241	0	0	0	0	0	0	0	0	0	0	0	0	0	0	0	0	0	0	0	0	0	0	0	0	0	0	0	0	0	0	0	0	0	0	0	0	0	0	0	0	0	0	0	0	0	0	0	0	0
XLOC_001242	0.09	0.06	0.06	0.04	0	0.04	0	0.08	0.03	0	0	0	0.1	0.03	0.1	0.03	0	0	0	0	0	0	0.04	0.04	0	0	0	0	0	0	0	0	0	0	0	0.04	0	0.14	0	0	0	0	0	0	0	0	0.12	0.27	0
XLOC_001243	0.94	0.87	1.18	1.72	1.38	1.67	0.99	0.95	0.53	0.31	0.41	0.63	1.06	0.7	0.56	0.75	0.36	0.33	0.42	0.49	1.02	0.4	0.55	0.39	0.62	0.48	0.42	0.34	0.63	0.37	0.08	0.3	0.42	0.31	0.41	0.34	0.66	0.7	0.46	0.33	0.8	0.36	0.27	0.58	0.53	0.28	0.52	0.78	0.59
XLOC_001244	1.78	2.26	2.15	3.27	2.2	2.89	2.06	2.57	1.83	2.61	2.48	1.89	1.29	2.02	1.32	1.42	3.06	1.89	2.11	1.45	2.19	2.94	2.25	2.11	2.93	4.56	1.65	1.4	3.56	2.92	2.25	2.48	1.88	1.58	2.24	1.81	2.68	4.07	1.55	4.04	3.32	2.55	1.75	2.25	3.43	3.26	3.93	2.46	2
XLOC_001245	0.46	0.87	0.71	0.62	1.12	0.83	0.46	0.78	0.72	0.47	0.19	0.3	0.34	0.24	0.35	0.41	0.56	0.59	0.73	0.53	0.77	0.43	0.64	0.77	0.77	0.63	0.68	0.68	0.51	0.27	0.2	0.65	0.48	0.49	0.82	0.71	0.9	1.04	0.79	0.49	0.99	0.52	0.41	0.5	0.57	0.37	0.88	0.31	0.89
XLOC_001246	1.12	1.5	1.33	2.45	1.69	1.85	1.13	1.58	1.89	2.01	2.85	2.46	2.68	2.79	1.84	1.82	1.96	1.31	1.78	1.5	1.92	1.68	2.01	2.01	1.38	1.05	1.62	1.68	1.2	1.24	2.31	1.27	1.55	1.5	1.48	1.86	1.77	2.19	1.94	1.13	2.23	1.19	1.98	1.55	1.76	2.23	2.68	2.04	1.46
XLOC_001247	0.21	0.25	0.71	0.33	0.56	0.18	0.14	0.28	5.29	5.2	3.61	4.6	6.35	5.56	3.64	7.2	0.48	0.7	1.1	0.61	1.17	1.01	1.11	1.55	0.12	0.2	0.52	0.97	0.87	0.99	1	0.54	1.69	1.04	1.55	2.08	2.9	2.04	2.22	2.05	0.86	0.99	1.48	0.73	1.14	0.72	1.58	0.6	1.17
XLOC_001248	0	0.01	0.03	0	0.05	0	0	0	0.05	0.14	0.02	0.16	0.46	0.18	0.16	0.51	0.02	0.06	0	0	0.02	0.06	0	0.04	0	0.08	0.05	0	0	0	0	0	0.03	0	0	0	0.08	0	0.15	0.14	0	0.03	0.03	0.01	0.02	0	0	0.04	0.03
XLOC_001249	0.09	0	0	0.11	0	0	0	0	0	0	0	0.05	0.02	0	0	0.24	0	0.07	0.09	0.04	0	0.11	0	0	0	0.08	0	0	0	0.03	0	0.17	0	0	0	0.09	0	0.09	0.16	0	0	0.05	0	0	0.03	0.14	0	0	0
XLOC_001250	1.52	0.82	1.01	1.11	0.88	1.24	1.18	0.93	0.48	0.41	0.24	0.23	0.4	0.44	0.26	0.27	0.48	0.47	0.63	0.42	0.74	0.52	0.65	0.57	0.96	0.43	0.59	0.24	0.27	0.12	0.19	0.31	0.48	0.26	0.8	0.65	0.44	0.56	0.41	0.22	0.43	0.79	0.63	0.57	0.48	0.56	0.85	0.45	0.88
XLOC_001251	1.05	1.08	0.71	1.03	0.42	1.65	0.67	0.84	0.56	0.66	0.45	0.42	0.3	0.71	0.45	0.5	0.2	0.48	0.26	0.22	0.25	0.34	0.18	0.28	0.43	0.43	0.25	0.16	0.02	0.39	0.14	0.16	0.65	0.7	0.19	0.54	0.21	0.59	0.42	0.41	0.21	0.39	0.36	0.5	0.08	0.25	0.22	0.36	0.39
XLOC_001252	0.23	0.05	0.22	0.06	0.08	0.07	0.5	0.14	0.78	0.62	0.28	0.25	0.55	0.44	0.86	0.32	0.06	0.11	0.24	0.38	0.85	0.76	0.43	0.27	0.22	0.13	0.22	0.04	0.1	1.44	0.67	0.62	0.28	0.75	0.29	0.76	0.6	2.02	0.9	1.15	0	0.21	0.13	0.2	0.37	0.75	0.74	0.26	0.35
XLOC_001253	0.6	1.23	1.74	1.19	1.04	1.24	1.67	1.74	0.93	0.95	2.16	1.84	1.55	1.28	1.38	1.49	1.28	1.19	0.92	1.4	0.89	1.75	1.56	1.42	0.89	0.66	0.81	1.26	0.61	0.45	1.05	0.79	0.6	1.79	1.41	1.63	0.58	2.81	1.75	1.19	0.92	1.2	1.35	1.52	1.34	1.32	2	1.28	0.6
XLOC_001254	0.49	0.31	0.32	0.29	0.16	0.35	0.19	0.4	0	0.09	0.15	0.2	0.31	0.42	0.09	0.09	0.19	0.44	0	0.04	0.04	0.15	0	0.07	0	0.07	0.05	0.15	0.08	0	0	0.03	0.09	0.09	0	0	0.04	0.21	0.05	0	0.23	0	0.25	0.43	0.22	0.15	0.47	0.08	0.09
XLOC_001255	16.16	25.95	12.32	21.28	3.8	8.72	19.11	24.5	0.02	0	0.02	0.02	0	0	0.04	0	0.03	0	0.08	0	0	0	0	0	0	0	0	0	0	0	0	0	0	0	0	0	0.03	0.04	0.23	0.14	0	0	0	0	0	0	0	0.03	0
XLOC_001256	0.43	0.77	0.52	0.63	1.12	1.04	0.71	0.66	0.32	0.29	0.37	0.48	0.41	0.23	0.26	0.21	0.23	0.29	0.21	0.33	0.37	0.47	0.16	0.6	0.28	0.25	0.2	0.43	0.16	0.29	0.45	0.15	0.25	0.35	0.23	0.36	0.39	0.35	0.37	0.28	0.45	0.35	0.14	0.28	0.27	0.49	0.53	0.26	0.26
XLOC_001257	1.26	1.17	1.69	2.17	3.16	2.1	2.6	2.29	1.38	0.95	1.47	1.29	2.08	1.64	1.43	2.09	1.57	1.51	0.87	2.37	2.2	0.67	2.25	1.34	2.15	0.9	1.59	1.43	1.08	1.12	2.44	1.68	1.42	0.58	1.32	1.69	0.94	1.22	1.91	1.68	1.38	1.46	2.24	1.15	1.02	2.13	1.86	1.01	1.24
XLOC_001258	0.51	1.06	1.14	1.19	0.93	1	1.24	0.97	0.98	0.99	1.63	1.17	0.93	1.02	1.7	1.33	0.94	1.18	1.32	1.17	1.32	0.5	0.8	1.12	0.85	1.34	1.4	0.99	0.68	1.16	0.49	0.74	2.02	2.33	1.83	1.43	1.86	2.68	1.27	1.16	1.41	1.95	1.06	1.74	1.26	1.6	2.36	1.24	1.11
XLOC_001259	0	0.11	0.05	0	0.06	0.05	0	0.11	0.04	0.2	0.08	0.02	0.2	0.2	0.16	0.11	0.07	0.09	0.13	0.18	0	0.08	0.05	0.05	0.28	0.09	0.02	0.08	0.04	0	0.13	0.37	0.02	0.14	0.09	0.06	0.05	0.23	0.22	0.14	0.16	0.19	0.02	0.03	0	0.04	0.11	0	0.14
XLOC_001260	0.21	0.1	0.34	0.42	0.4	0.29	0.25	0.27	0.59	0.68	0.96	0.62	0.76	0.83	0.99	0.59	0.59	0.77	0.28	0.33	0.47	0.68	0.38	0.6	0.5	0.46	0.98	0.57	0.24	0.55	0.43	0.33	0.77	0.55	0.38	0.48	0.64	0.5	0.69	0.6	0.36	0.44	0.32	0.33	0.34	0.15	0.45	0.29	0.34
XLOC_001261	1.08	0.73	0.59	0.76	0.92	1.61	1.37	0.77	0.43	0.31	0.42	0.36	0.73	1.04	0.58	0.66	0.32	0.29	0.15	0.37	0.5	0.21	0.42	0.52	0.18	0.62	0.23	0.32	0.25	0.35	0.3	0.32	0.32	0.15	0.35	0.31	0.55	0.27	0.51	0.4	0.47	0.53	0.41	0.4	0.42	0.97	0.3	1.13	0.59
XLOC_001262	0.79	0.11	0.68	1.12	1.7	0.68	1.3	0.77	1.25	1.53	1.6	1.96	0.85	0.76	1.22	1.37	0.73	0.62	1.75	1	1.5	1.44	0.88	1.08	1.19	1.56	1.02	1.19	1.48	1.65	0.51	0.87	0.97	1.52	1.84	1.54	1.09	1.88	1.19	1.42	0.87	0.43	1.06	0.6	1.07	0.81	0.96	0.48	0.98
XLOC_001263	0.44	0.53	0.32	0.16	0.23	0.31	0.12	0.37	0.41	0.27	0.08	0.25	0.11	0.01	0.06	0.15	0.28	0.22	0.37	0.6	0.66	0.28	0.31	0.22	0.38	0.23	0.55	0.65	0.39	0.37	0.28	0.49	0.39	0.73	0.22	0.18	0.24	0.64	0.39	0.03	0.6	0.41	0.64	0.4	0.15	0.3	0.19	0.44	0.44
XLOC_001264	0.71	0.94	0.65	0.91	0.7	1.32	0.6	0.76	0.39	0.46	0.51	0.83	0.65	0.63	0.51	0.83	0.5	0.47	0.25	0.25	0.36	0.45	0.45	0.51	0.29	0.58	0.49	0.56	0.58	0.59	0.53	0.54	0.5	0.55	0.93	0.27	0.27	0.97	0.45	0.57	0.91	1.01	0.72	0.95	0.69	0.81	0.72	1.18	0.4
XLOC_001265	16.59	12.47	10.43	18.64	19.21	20.14	17.62	15.25	18.52	20.86	25.59	21.67	13.09	16.41	13.11	15.24	32.62	23.64	29.59	36.02	21.8	21.42	21.54	25.03	26.11	19.24	15.25	22.79	14.71	17.17	16.91	15.5	26.63	20.42	16.88	17.76	22.47	19.05	17.35	27.71	30.34	21.98	18.53	24.24	15.99	16.54	11.78	17.05	34.33
XLOC_001266	0.83	1.02	0.66	0.84	0.61	0.7	0.49	0.71	0.43	0.62	0.43	0.6	0.41	0.72	0.51	0.52	0.78	0.43	0.63	0.52	0.65	0.65	0.94	0.4	0.31	0.28	0.54	0.17	0.23	0.87	0.63	0.34	0.55	0.44	0.63	0.29	0.68	0.67	0.64	0.73	0.45	0.56	0.87	0.83	0.66	0.42	0.83	0.81	0.47
XLOC_001267	2.9	2.87	2.94	2.32	2.04	3.45	3.11	2.53	2.01	1.99	1.51	1.32	1.5	1.22	1.42	1.77	1.42	1.6	0.95	1.55	1.55	1.24	1.33	1.99	1.01	0.6	1.03	1.85	0.92	1.27	2.01	1.3	1.21	1.24	1.76	1.44	1.65	1.69	1.7	2.03	1.35	1.18	2.06	1.81	1.5	2.04	2.72	1.77	1.1
XLOC_001268	1.93	1.95	3.05	2.41	2.67	4.48	2.12	2.67	1.65	1.76	1.92	1.42	1.96	2.84	3.62	2.28	1.86	1.91	1.99	1.35	1.57	1.07	1.89	1.92	1.92	1.23	1.87	1.45	1.65	1.9	1.58	1.04	3.46	3.07	1.55	2.12	0.93	2.04	1.02	1.53	3.1	2.3	2.22	1.81	2.33	2.86	3.46	2.32	2.79
XLOC_001269	0.53	0	0.49	0.36	0.67	0.2	1.33	0.67	0.49	0.32	0.36	0.77	0.49	0.34	0.21	0.44	0.29	0.22	1	0.45	0.69	0.46	0.3	0.52	0.21	0.29	0.64	0.32	0.29	0.18	0.16	0.75	0.22	0.4	0.57	0	0.66	0.08	0.09	0.09	0.34	0.33	1.15	0.58	0	0.78	0.41	0.1	1.12
XLOC_001270	0.12	0.06	0.15	0.19	0.04	0.21	0.26	0.36	0.27	0.15	0.26	0.33	0.11	0.3	0.14	0.24	0.41	0.26	0.37	0.52	0.45	0.45	0.49	0.7	0.3	0.2	0.21	0.88	0.82	0.39	0.4	0.23	0.39	0.27	0.23	0.4	0.64	0.38	0.43	0.56	0.11	0.59	0.71	1.08	1.51	0.3	0.39	0.84	0.42
XLOC_001271	0	0.09	0	0	0	0.06	0	0	0.04	0.03	0.17	0.18	0.11	0.15	0.18	0.35	0	0.05	0	0	0.12	0.08	0	0.23	0.15	0	0	0.17	0.08	0	0.11	0.04	0.24	0	0.31	0.13	0	0.21	0.08	0.22	0	0	0	0.07	0	0	0.05	0	0
XLOC_001272	0.91	0.48	0.98	1.02	0.89	0.73	0.77	0.46	0.68	0.51	0.13	0.62	0.38	0.22	0.47	0.64	0.8	0.42	0.92	0.95	0.41	0.39	0.67	0.61	0.44	0.07	0.25	0.24	0.28	0.81	0.38	0.32	0.8	0.62	0.85	0.57	0.06	0.27	0.38	0.73	0.75	0.28	1.02	0.49	0.35	0.27	0.18	0.66	0.95
XLOC_001273	0	0	0	0	0	0	0	0	0.05	0.05	0.07	0	0.02	0.05	0	0.03	0.44	0.25	0.31	0.25	0.04	0.16	0.38	0.15	0.1	0.14	0.07	0.11	0.11	0.36	0.21	0.13	0.25	0.06	0	0	0.04	0.05	0	0.15	0.02	0.19	0.54	0.33	0.26	0.84	0.47	0.5	0.2
XLOC_001274	0.54	0.89	0.88	0.65	0.42	0.96	0.47	0.51	1.24	1.49	1.95	0.8	0.82	0.94	0.96	1.29	0.75	0.61	1.1	1.09	0.62	1.01	0.95	0.81	0.62	0.64	0.83	0.56	0.84	1.26	1.3	0.82	1.37	1.5	1.34	1.85	1.72	2.07	1.99	2	0.82	0.78	0.53	0.46	0.32	1.55	1.67	1.14	0.74
XLOC_001275	0.95	0.95	0.75	0.28	0.69	0.52	0.32	0.97	1.38	1.31	1.4	1.48	1.81	1.89	0.99	0.95	1.5	1.07	1.01	1.07	0.5	1.21	0.44	1.15	1.45	0.99	0.76	0.96	0.59	0.33	1.45	0.7	0.83	1.18	1.21	1.56	0.9	0.72	0.87	1.13	1.4	1.09	1.12	1.41	0.92	0.72	1.05	1.46	1.07
XLOC_001276	0.73	1.15	0.39	1.15	0.46	0.06	0.17	0.26	16.38	20.85	17.93	24.7	25.41	30.6	20.95	20.55	30.55	32.4	20	30.71	19.83	22.27	17.25	20.39	30.71	28.94	15.34	23.83	16.92	12.92	14.77	18.44	23.86	31.4	28.12	31.79	22.9	21.72	25.09	22.71	24.6	23.42	12.44	15.84	15.17	16.1	14.16	11.78	26.6
XLOC_001277	0.05	0.21	0.26	0.29	0.1	0.04	0.38	0.27	1.58	0.98	0.83	1.99	1.92	3.59	1.8	2.21	1.08	0.66	0.84	0.85	1.26	0.88	0.78	0.66	0.96	0.71	0.81	0.83	0.84	0.77	0.55	1.3	0.64	0.84	1.45	2.02	1.69	1.02	1.5	0.99	1.17	1.27	0.64	2.08	0.95	0.22	0.95	1.47	0.93
XLOC_001278	0.47	0.48	0.77	0.34	0.79	0.35	0.74	0.68	0.27	0.32	0.49	0.35	0.34	0.42	0.2	0.52	0.62	0.36	0.68	0.42	0.36	0.28	0.4	0.29	0.22	0.31	0.36	0.3	0.31	0.3	0.34	0.33	0.39	0.77	0.31	0.65	0.2	0.59	0.19	0	0.31	0.33	0.41	0.42	0.14	0.26	0.45	0.18	0.3
XLOC_001279	15.32	21.61	14.61	17.06	17.86	23.35	19.91	19.36	9.31	10.62	8.81	10.72	12.68	15.09	10.23	11.4	9.61	11.24	12.87	12.8	13.42	14.97	13.24	14.48	9.44	7.4	8.9	9.97	8.66	12.05	13.26	8.04	7.91	8.64	5.91	6.65	7.82	11.82	12.36	5.2	11.58	11.98	12.31	11.51	9.6	16.19	11.07	12.91	11.63
XLOC_001280	6.76	5.34	8.4	7.73	7.09	6.77	7.33	6.38	3.94	4.57	4.57	4.6	10.13	10.83	11.62	6.39	3.06	5.53	3.28	3.55	3.84	3.62	4.05	4.63	3.59	3.36	5.14	2.69	3.54	3.88	4.16	2.32	10.25	8.18	7.84	8.56	4.85	6.3	10.55	4.32	4.55	4.2	4.27	4.32	3.87	5.89	4.5	4.95	4.58
XLOC_001281	0.42	0.35	0.14	0.11	0.28	0.2	0.09	0.58	0.25	0.05	0.17	0.05	0.05	0.08	0.13	0.24	0.65	0.23	0.05	0.32	0.08	0.57	0	0.04	0.29	0.49	0.11	0	0.03	0.25	0	0.23	0	0.17	0.26	0.14	0.12	0.19	0.05	0.79	0.34	0.21	0.29	0.07	0	0.2	0	0.1	0.11
XLOC_001282	0.36	0.2	0.52	0.23	0.21	0.75	0.2	0.19	0.13	0.11	0.11	0	0.2	0.12	0.08	0.25	0	0.05	0	0.07	0	0	0.17	0.19	0	0.08	0.24	0.19	0	0	0	0.4	0	0.11	0	0.07	0.37	0	0.33	0	0	0.47	0.24	0.07	0.09	0	0	0.29	0.16
XLOC_001283	0.74	1.01	0.5	1.07	0.55	0.72	0.43	0.66	0.35	0.34	0.56	0.71	0.25	0.37	0.41	0.43	0.32	0.46	0.24	0.27	0.29	0.23	0.18	0.44	0.47	0.18	0.52	0.82	0.23	0.31	0.15	0.57	0.44	0.48	0.35	0.32	0.32	0.72	0.48	0.16	0.46	0.1	0.44	0.28	0.74	0.64	0.25	0.09	0.26
XLOC_001284	1.77	2.58	1.16	5.61	2.28	3.45	2.55	3.82	0.06	0.14	0.03	0.2	0.03	0.16	0	0.11	0.05	0.28	0	0.03	0.2	0.16	0.21	0.41	0.18	0	0.11	0.03	0.12	0.08	0.1	0.02	0.09	0.05	0.06	0.35	0.31	0.13	0.04	0.25	0.2	0.32	0.02	0.18	0.23	0.02	0.42	0.46	0.11
XLOC_001285	2.16	3.09	3.33	1.89	1.38	1.06	1.4	2.33	0.82	0.86	1.49	0.9	1.48	1.02	0.71	1.15	0.99	0.58	0.59	0.74	0.79	0.92	0.7	0.85	1.02	1.51	0.95	0.64	0.8	0.87	1.13	0.9	0.38	0.78	1.81	1.03	0.7	0.61	1.42	0.53	1.06	0.99	0.98	0.83	0.31	1.87	1.31	1.03	1.19
XLOC_001286	0.15	0.18	0.12	0.06	0	0.03	0.04	0.16	0.2	0.34	0.38	0.25	0.23	0.29	0.15	0.21	0.4	0.22	0.22	0.12	0.35	0.22	0.11	0.11	0.47	0.42	0.16	0.11	0.11	0.17	0	0.14	0.27	0.17	0.56	0.59	0.4	0.56	0.2	0.17	0.16	0.19	0.37	0.12	0.05	0.07	0.04	0.02	0.21
XLOC_001287	69.62	64.75	67.93	69.67	82.43	79.42	66.46	74.41	73.83	80.13	80.72	78.34	72.75	59.97	56.04	68.37	61.38	66.91	81.04	65.57	70.5	70.31	66.15	61.99	45.99	45.37	52.92	62.11	49.96	49.4	56.09	49.78	59.6	48.31	63.74	57.99	56.23	62.92	57.13	55.57	55.02	59.92	61.89	67.4	47.87	50.02	56.77	58.52	65.71
XLOC_001288	2.33	2.02	2.13	2.49	1.84	2.68	2.01	2.44	1.11	1.03	1.18	1.23	1.12	1.82	1.56	1.3	0.88	0.77	0.92	0.88	1.27	0.55	0.77	1.47	0.91	1.17	0.76	1.12	0.65	1.21	0.79	0.93	1.43	0.99	1.13	0.93	0.83	1.47	1.21	0.98	0.98	1.16	1.43	0.96	0.95	1.19	1.18	1.28	0.6
XLOC_001289	0.16	0.05	0.08	0.04	0.25	0.27	0.02	0.1	0.2	0.26	0.25	0.44	0.49	0.81	0.62	0.42	0.32	0.57	0.32	0.38	0.41	0.28	0.18	0.16	0.59	0.65	0.32	0.58	0	0.41	0.16	0.18	0.31	0.97	0.72	0.36	0.49	0.73	0.24	0.69	0.48	0.39	0.88	0.32	0.65	0.14	0.34	0.32	0.15
XLOC_001290	0.16	0.09	0	0.13	0.13	0.09	0.24	0.14	0.42	0.26	0.07	0.2	0.06	0.21	0.07	0.15	0.08	0.08	0	0.05	0.12	0.23	0.17	0.09	0.12	0.1	0	0.45	0.23	0.03	0.18	0.21	0.11	0.08	0.05	0.28	0.11	0.27	0.43	0.24	0	0.16	0	0.09	0.05	0.4	0.14	0	0.18
XLOC_001291	2.99	2.87	3.38	4.46	3.18	5.02	4.31	4.63	2.05	1.29	1.66	1.95	1.59	1.81	1.19	1.71	2.76	1.78	3.66	2.22	2.78	3.69	2.84	3.06	1.26	1.25	1.89	2.37	2.12	2.92	2.45	2.01	0.96	1.72	1.79	2.4	2.11	2.66	1.25	1.5	3.59	2.62	4.54	3.77	3.86	4.98	2.14	6.19	2.25
XLOC_001292	2.9	2.89	3.29	2.87	2.68	3.1	3.08	2.81	1.61	1.4	1.55	1.44	1.14	1.43	1.36	1.57	1.17	1.27	1.41	1.41	1.31	1.51	1.35	1.23	1.73	1.21	1.88	1.85	1.27	0.98	1.5	1.27	1.81	1.84	2.14	1.5	1.1	1.79	2.14	1.84	2.17	2.56	1.94	2.07	1.66	1.77	1.83	1.83	1.43
XLOC_001293	0.11	0.1	0.06	0.22	0.61	0.68	0.49	0.38	0.17	0.1	0.09	0.31	0.9	0.64	0.3	0.65	0.02	0.04	0	0.06	0.05	0.03	0	0.15	0.06	0.03	0	0	0.09	0.02	0.06	0.09	0.08	0.02	0.05	0.11	0.12	0.09	0	0.13	0.09	0.12	0.1	0.09	0.28	0.39	0.15	0.19	0
XLOC_001294	9.63	9.24	9.31	9.55	9.69	9.95	8.77	9.12	9.34	9.1	10.07	8.53	9.94	8.46	7.83	8.69	11.27	9.97	13.52	10.42	12.97	12.02	12.97	11.43	8.16	8.98	10.91	8.3	10.07	8.24	9.4	9.19	8.43	8.28	7.51	6.51	8.07	7.21	9.49	8.24	11.15	10.99	11.97	11.21	11.44	9.59	10.98	10.98	12.24
XLOC_001295	1.37	1.49	1.33	1.03	0.67	1.01	1.45	2.31	0.32	0.07	0	0.18	0.15	0.12	0.11	0.2	0.05	0.29	0	0	0	0.17	0.11	0.12	0.12	0.08	0	0.36	0.04	0.08	0.11	0.34	0.35	0.56	0.51	0.07	0.24	0	0	0.39	0.45	0.45	0.31	0.38	0.45	0.37	0	0.65	0.08
XLOC_001296	0.29	0.39	0.21	0.49	0.42	0.86	0.13	0	0.08	0.03	0.07	0.13	0.05	0.24	0.16	0.06	0.18	0.1	0.14	0.37	0.17	0.17	0.38	0.29	0.29	0.08	0.05	0	0.06	0.28	0.13	0.15	0.03	0.18	0.18	0.05	0.25	0.2	0.17	0.16	0.39	0.42	0.13	0	0	0.11	0.26	0.19	0.16
XLOC_001297	1.32	1.36	1.26	1.37	1.32	1.26	0.91	1.1	0.3	0.38	0.32	0.29	0.59	0.63	0.4	0.13	0.14	0.12	0.26	0.11	0.19	0.39	0.22	0.18	0.19	0.35	0.29	0.37	0.35	0.47	0.07	0.03	0.23	0.43	0.54	0.43	0.34	0.6	0.45	0.55	0.18	0.21	0.27	0.19	0.18	0.26	0.06	0.25	0.18
XLOC_001298	3.89	3.72	3.85	4.24	3.94	5.6	5.34	4.15	2.53	3.16	3.16	2.33	3.17	3.57	2.31	2.8	3.39	3.33	3.52	3.54	3.91	4.81	4.2	4.77	4.1	2.78	3.31	2.87	3.11	3.61	4.06	2.65	2.93	3.06	1.68	2.71	2.4	2.78	2.7	2.68	4.65	3.45	3.17	4.83	4.21	5.19	3.7	4.74	4.04
XLOC_001299	2.05	1.56	1.66	1.82	2.35	3.36	2.87	3.67	0.13	0.4	0.13	0.23	0.25	0.39	0.21	0.1	0.4	0.27	0.69	0.42	0.66	0.42	0.2	0.22	0.22	0.28	0.22	0.36	0.21	0.33	0.78	0.29	0.46	0.06	0.04	0.21	0.18	0	0.1	0.1	0.21	0.21	0.36	0.34	0.15	0.31	0.06	0.26	0.19
XLOC_001300	0.62	0.79	0.53	0.44	0.36	0.75	0.85	0.6	0.87	1.01	0.93	0.65	0.57	0.87	0.96	1	0.48	0.57	0.88	0.84	0.5	0.53	1.18	1.53	0.17	0.24	0.76	1.19	0.69	0.77	0.2	0.27	0.36	0.6	0.4	0.18	0.16	0.13	0.36	0.49	0.41	0.47	0.45	0.34	0.18	0.71	0.63	0.46	1.05
XLOC_001301	4.28	3.55	4.04	3.64	2.68	3.1	2.95	4.45	1.98	2.05	1.78	1.81	1.88	1.97	1.33	1.36	1.2	1.03	0.6	1.56	1.02	1.24	1.11	1.28	1.11	1.06	0.93	0.7	0.83	1.02	2.1	1.21	1.43	1.59	1.7	1.57	0.87	1.22	3.04	1.45	2.68	2.75	1.26	2.46	2.73	2.77	2.25	2	1.09
XLOC_001302	1.21	0.94	0.69	0.74	1.09	1.42	1.12	0.85	0.42	0.32	0.37	0.33	0.14	0.29	0.55	0.47	0.04	0.27	0.28	0.1	0.23	0.09	0.4	0.13	0.26	0.21	0.38	0.24	0.24	0.12	0.08	0.06	0.24	0.21	0.17	0.42	0.2	0.5	0.41	0.26	0.29	0.25	0.51	0.13	0.24	0.12	0.45	0.38	0.06
XLOC_001303	0	0	0.03	0	0	0	0	0	3.54	3.7	5.06	3.98	2.88	6.13	5.39	5.47	2.11	2.12	4.63	2.87	3.69	7.75	8.13	7.8	2.9	3.18	6.19	5.65	7.35	7.96	10.71	6.83	1.25	0.63	2.48	2.72	1.88	3.36	4.94	4.21	0.9	0.71	0.49	0.28	0.18	0.6	0.84	0.44	3.19
XLOC_001304	4.08	3.9	3.31	3.9	5.92	5.09	3.75	4.69	0.97	1.02	1	1.19	1.26	1.51	1.14	1.34	1.47	1.54	1.28	1.63	1.74	1.82	1.08	1.92	2.49	1.62	1.73	1.81	0.92	2.34	1.62	1.46	2.36	2.27	1.63	1.8	1.4	1.95	1.55	1.94	3.52	3.3	2.64	2.45	1.99	3.07	3.06	3.09	2.12
XLOC_001305	1.17	1.67	1.11	1.27	1.03	0.37	0.51	0.71	0.58	1.75	1.51	0.78	0.57	1.12	0.79	1.18	0.81	0.4	0.5	0.78	0.28	0.53	0.69	0.85	0.87	0.71	0.42	0.87	0.15	1.07	0.2	0.23	0.81	0.78	1.21	1.09	1.12	0.7	0.43	0.7	1.16	0.68	1.14	0.94	0.81	0.67	0.38	0.71	0.7
XLOC_001306	1.07	1.54	1.23	0.7	0.65	1.5	1.1	1.31	0.65	0.38	0.48	0.6	0.61	0.46	0.73	0.66	1	0.92	1.21	1.17	0.83	0.81	0.58	0.76	0.8	0.97	0.66	0.67	0.24	1.06	1.3	0.97	0.55	0.82	1.21	0.4	0.79	0.85	0.73	0.61	1.29	0.74	0.74	0.86	0.86	0.91	0.56	0.83	1.14
XLOC_001307	0.55	0.12	0.43	0.25	0.6	0.61	0.08	0.75	0.16	0.03	0.27	0.18	0.15	0.59	0.16	0.03	0.43	0.09	0.37	0.24	0.31	0.44	0.07	0.07	0.12	0.11	0.43	0.16	0.22	0.47	0.19	0.08	0.26	0.05	0.23	0.32	0.26	0.84	0.04	0.3	0.33	0	0.4	0.17	0.39	0.42	0.27	0.3	0.19
XLOC_001308	2.16	1.89	1.75	1.47	2.16	2.77	2.02	2.45	0.77	1.03	0.86	0.78	1.25	1.51	1.22	1.01	0.48	0.77	1.09	0.42	0.72	0.53	1.06	0.8	0.68	0.44	0.9	0.57	0.67	0.86	0.52	1.15	1.46	1.56	0.69	0.98	0.7	1.81	0.9	0.64	1.14	0.87	1.11	1.29	1.08	1.11	0.76	0.85	0.77
XLOC_001309	0.58	0.89	0.72	0.71	1.28	1.11	0.79	1.49	1.14	1.76	1.35	0.78	1.11	0.99	0.74	0.78	1.45	2.15	1.53	1.14	1.55	1.49	0.95	1.38	1	1.18	0.52	1.09	1.56	1.33	1.18	1.34	1.17	1.79	1.23	0.56	1.37	1.29	1.22	1.22	0.9	2	1.31	0.7	1.27	0.95	0.6	1.01	1
XLOC_001310	0.98	0.95	1.1	0.98	0.97	1.15	1.06	0.89	0.4	0.46	0.52	0.18	0.36	0.32	0.52	0.39	0.36	0.46	0.46	0.46	0.77	0.49	0.39	0.54	0.48	0.35	0.48	0.5	0.28	0.75	0.67	0.85	1.02	0.7	1.32	0.77	0.78	1.7	0.68	1.67	0.71	0.86	0.93	1.31	1.15	1.07	0.94	1.25	0.45
XLOC_001311	0	0.04	0.14	0	0	0.05	0.06	0	0.04	0	0.07	0.03	0.03	0.07	0	0.15	0.05	0.14	0.06	0.12	0	0	0	0.22	0	0.03	0.57	0.03	0	0.19	0.17	0.23	0.18	0.19	0	0.12	0	0	0.22	0.21	0.14	0	0.18	0.26	0.45	0.08	0.39	0.04	0.07
XLOC_001312	2.17	2.73	3.1	2.67	1.31	3.71	3.65	2.93	2.11	2.24	2.56	2.42	2.7	2.23	2.1	2.95	1.42	2.67	1.95	2.44	2.3	2.41	1.95	2.73	1.9	1.46	3.51	2.18	2.09	2.91	2.18	2.22	2.76	1.83	2.62	2.23	1.61	2.1	1.99	2.86	2.53	2.3	4.04	3.01	2.69	3.74	2.39	4.12	1.72
XLOC_001313	0.03	0.06	0	0	0	0	0	0	0.15	0.18	0.31	0.03	0.17	0.19	0.02	0.04	0.1	0.04	0.03	0.03	0	0.11	0	0.13	0	0	0.07	0	0	0.15	0	0.02	0	0.09	0.12	0.06	0.13	0.19	0	0	0	0.12	0.07	0.02	0.09	0	0.04	0.02	0
XLOC_001314	0.53	1.04	0.65	1	0.73	0.96	0.83	1.45	0.31	0.28	0.3	0.11	0.2	0.21	0.15	0.18	0.74	0.11	0.21	0.31	0.29	0	0.25	0.45	0.39	0.26	0.45	0.08	0	0.09	0.37	0.62	0.23	0.12	0.25	0.31	0.36	0.27	0.55	0	0.12	0.12	0.33	0.45	0.31	0.89	0.4	0.36	0
XLOC_001315	0.74	1.68	0.88	1.78	1.67	1.21	1.19	1.24	0.78	0.72	1.06	0.74	1.04	1	0.92	1.18	0.66	0.92	0.56	0.72	0.67	0.54	0.56	0.7	0.81	0.91	1.35	0.44	0.92	0.22	0.34	1.27	1.31	0.96	1.25	1.05	0.89	0.65	1.33	0.67	1.63	1.26	1.31	1.34	0.7	1.36	1.41	0.88	0.88
XLOC_001316	0.14	0.23	0.35	0.03	0.1	0.09	0.03	0.15	0.06	0	0.04	0	0	0	0	0	0	0.05	0	0	0	0	0.03	0.03	0	0	0	0	0	0	0	0	0.1	0	0	0	0.06	0.21	0.08	0.04	0	0	0.02	0	0	0	0.05	0	0
XLOC_001317	6.02	8.36	7.44	7.14	7.01	5.21	5.34	6.73	1.96	2.69	4.14	2.99	2.31	2.55	3.73	2.68	1.27	1.6	2.28	2.04	1.47	1.94	1.95	1.62	1.43	2.09	3.16	1.93	1.57	2.36	3.34	2.77	1.79	3.48	5.6	3.68	2.75	5.74	4.66	3.57	1.16	1.87	3.07	1.88	1.8	2.77	2.84	2.41	1.46
XLOC_001318	11.14	14.43	6.47	11.69	6.2	9.74	9.9	8.62	1.35	1.1	1.29	1.62	2.05	2.43	1.45	1.85	1.4	1.26	0.98	1.71	1.38	1.5	1.62	1.86	1.35	1.07	1.45	1.44	0.97	1.82	1.41	1.37	1.41	1.53	1.14	0.74	0.69	1.2	1.63	0.83	3.38	4.25	3.64	5.2	3.34	4.23	3.46	2.65	1.33
XLOC_001319	0.43	0.32	0.16	0.72	1.88	1.01	0.16	0.69	0.28	0.52	0.43	0.62	1.31	1.18	0.6	0.8	0.37	0.22	0.4	1.06	0.63	0.26	0.14	0.33	0.9	0.33	0.32	0.32	0.73	0.16	0.26	0.53	0.79	0.26	0.2	0.25	0.56	0.31	0.1	0.2	0.36	1.14	0.88	0.26	0.82	0.42	0.12	1.35	0.2
XLOC_001320	3.63	2.76	2.84	3.53	3.75	3.18	3	3.58	1.15	1.08	1.27	1.79	1.67	1.58	1.28	1.22	1.36	1.27	1.05	1.7	1.89	0.85	1.44	1.46	1.37	0.44	1.13	1.17	0.84	1.18	1.14	1.59	1.11	1.22	1.51	1.45	1.26	0.95	1.06	1.81	1.64	1.83	1.91	1.71	1.83	1.28	1.92	2.11	1.34
XLOC_001321	0.03	0.39	0.15	0.22	0	0.09	0.22	0.09	0.32	0.18	0.2	0.36	0.39	0.54	0.64	0.04	0.05	0.49	0.07	0.3	0.19	0.25	0.14	0.18	0.23	0.28	0.25	0.37	0	0.12	0.48	0.21	0.15	0.2	0.13	0.17	0.27	0.35	0.2	0.08	0.64	0.66	0.42	0.69	0.3	0.39	0.05	0.21	0.12
XLOC_001322	0.81	0.91	0.58	0.67	0.72	0.3	1.03	1.12	0.11	0.73	0.3	0.14	0.33	0.22	0.17	0.18	0.21	0.33	0.35	0.49	0.17	0.19	0.18	0.3	0.47	0.32	0.22	0.46	0.41	0.46	0.12	0.19	0.14	0.31	0.25	0.38	0.03	0	0.04	0.22	0.17	0.63	0.45	0.6	0.32	0.56	0.24	0.42	0.3
XLOC_001323	0	0	0	0	0	0	0	0	0	0	0.19	0	0.02	0	0	0	0.07	0	0.06	0	0.13	0	0	0.12	0	0	0.05	0	0	0	0	0.03	0	0	0.34	0.06	0	0	0	0.1	0	0	0	0	0.05	0	0	0.08	0
XLOC_001324	1.25	1.19	1.32	0.95	0.45	1.64	0.8	1.11	1.91	2.25	2.62	3.28	4.93	5.88	4.04	4.51	2.6	3.32	3.66	2.68	1.83	2.55	2.7	3.14	2.13	2.59	2.49	2.87	1.55	3.27	1.64	2.37	3.65	3.46	3.92	4.67	2.94	3.74	4.22	4.41	3	2.17	2.44	2.27	2.41	2.34	2.73	1.86	2.83
XLOC_001325	1.99	2.44	2.72	2.98	2.08	3.6	2.74	2.05	1.79	2	2.56	2.29	2.56	2.56	2.01	1.93	2.25	1.84	2.71	1.9	2.37	2.09	2.13	2.27	1.87	1.67	2.18	3.08	1.03	2.98	2.77	1.85	1.58	1.37	1.33	1.3	1.82	2.94	2.15	1.53	2.75	2.07	2.47	3.31	2.04	2.85	2.27	2.94	1.64
XLOC_001326	0.53	0.42	0.51	0.35	0.56	0.3	0.6	0.54	0.67	0.53	0.64	0.65	0.66	0.57	0.41	0.43	0.2	0.28	0.44	0.47	0.16	0.16	0.38	0.11	0.07	0	0.47	0.11	0.16	0.18	0.02	0.13	0.19	0.32	0.29	0.64	0.19	0.14	0.46	0.25	0.22	0.05	0.12	0.18	0.29	0.16	0.3	0.42	0.49
XLOC_001327	0.04	0.08	0.21	0.26	0.12	0.43	0.72	0.29	0	0.39	0.19	0.24	0.11	0.4	0.05	0.14	0.41	0.21	0.21	0.28	0.67	0.3	0.95	0.32	0	0.09	0.28	0.17	0	0.15	0.58	0.3	0	0.15	0.08	0	0	0.26	1.01	0	0.07	0.27	0.42	0.04	0.47	0.27	0	0	0
XLOC_001328	0.42	0.86	0.46	0.93	0.95	0.44	0.3	0.53	0.48	0.24	0.33	0.18	0.26	0.29	0.34	0.19	0.28	0.43	0.25	0.4	0.27	0.36	0.06	0.2	0.26	0.29	0.01	0.13	0.1	0.09	0.25	0.17	0.39	0.46	0.15	0.19	0.18	0.25	0.04	0.07	0.53	0.17	0.28	0.33	0.37	0.21	0.3	0.55	0.5
XLOC_001329	0.12	0.23	0.1	0.11	0.19	0.07	0.1	0.05	0.21	0.2	0.2	0.07	0.12	0.19	0.31	0.24	0.13	0.16	0.12	0.15	0.18	0.3	0.37	0.41	0.13	0.62	0.19	0.26	0.33	0.41	0.28	0.44	0.31	0.63	0.34	0.43	0.25	0.3	0.49	0.54	0.32	0.67	0.14	0.23	0.27	0.25	0.62	0.61	0.17
XLOC_001330	1.16	1.96	1.08	2.01	1.36	1.65	1.7	1.59	0.92	0.55	0.9	0.61	0.66	0.72	0.93	0.74	0.98	0.87	1.17	1.41	0.89	1.48	1.01	0.99	0.62	0.54	0.85	0.84	0.58	0.69	0.84	0.53	0.84	0.94	1.41	0.79	1.34	1.02	0.8	0.46	1.91	0.79	1.17	1.52	0.75	2.3	1.38	0.82	0.78
XLOC_001331	17.83	17.94	22.05	14.28	23.56	20.34	19.73	19.77	10.27	9.99	12.93	8.32	8.56	7.02	8.13	9.55	10.23	8.14	14.02	8.51	12.35	9.95	11.94	10.76	11.64	10.43	14.6	10.15	16.05	11.57	16.06	16.76	9.67	10.19	15.12	7.54	10.28	12.83	11.41	11.25	12.99	12.05	17.99	14.01	17.05	12.22	15.21	13.53	11.02
XLOC_001332	30.05	30.02	30.28	26	27.41	31.3	33.6	28.64	14.31	18.16	17.39	18.41	18.25	18.29	15.46	15.85	15.44	17.44	22.05	18.64	18.16	17.96	16.06	17.63	11.55	11.96	12.73	12.16	19.82	15.65	20.6	15.38	12.31	12.93	19.44	14.05	16.9	13.16	15.32	22.12	19.45	17.85	18.62	20.93	18.55	19.63	16.56	20.03	17.8
XLOC_001333	0.2	0.2	0.14	0.23	0.49	0.34	0.36	0.29	0.02	0.09	0.12	0.24	0.3	0.24	0.04	0.08	0	0.07	0.1	0.16	0.42	0.28	0.11	0.31	0	0.05	0.15	0.03	0.37	0.08	0.18	0.06	0.24	0.12	0.15	0.58	0.17	0	0.34	0.34	0.16	0.04	0.15	0.27	0.22	0.02	0.13	0.16	0.22
XLOC_001334	10.81	10.4	12.35	10.23	9.98	8.98	8.76	12.62	28.19	25.13	25.4	25.52	21.28	20.77	25.99	21.63	16.66	11.96	17.64	17.96	16.34	13.07	21.43	16.22	16.77	16.19	17.61	19.14	17.45	15.24	18.73	16.65	19.03	16.44	25.49	20.65	21.24	20.63	25.64	17.92	13.05	14.14	16.72	14.89	16.1	11.89	18.22	15.47	15.8
XLOC_001335	0.03	0.55	0.32	0.35	0.8	0.47	0.37	0.36	0.54	0.77	0.69	0.23	0.42	0.61	0.32	0.57	0.34	0.53	0.14	0.56	0.37	0.45	0.41	0.96	0.04	0.56	0.34	0.42	0.4	0.24	1.04	0.4	1.06	0.88	1.37	0.86	1.08	1.27	1.5	1.92	0.82	0.3	0.59	0.34	0.56	0.2	1.02	0.35	0.58
XLOC_001336	1.57	1.06	0.87	1.15	1.37	2.56	0.83	1.93	1.42	1.4	1.35	1.53	1.24	1.64	1.54	1.29	2.33	2.11	1.1	2.65	2.08	3.6	1.83	2.17	1.22	0.66	1.09	1.45	2.04	1.77	1.17	1.67	1.79	0.98	1.02	1.12	2.44	3.38	2.17	1.16	2.5	0.99	1.29	1.31	1.58	1.06	1.19	1.48	2.59
XLOC_001337	0.68	0.75	0.47	0.51	0.64	0.75	0.63	0.71	0.98	0.91	1.16	1.08	0.72	0.59	0.79	1.11	0.43	0.4	1.03	0.93	0.79	1.05	0.71	0.77	0.47	0.61	0.59	0.74	0.66	1.07	0.53	0.72	0.61	0.99	1.39	1.15	1.52	1.31	1.94	1.33	0.58	0.36	0.43	0.69	1.05	0.6	0.59	0.34	0.77
XLOC_001338	11.61	12.3	12.37	12.53	17.14	18.33	14.57	14.26	14.28	12.93	13.97	13.78	14.26	11.13	12.37	12.29	15.15	13.87	18.46	18.4	17.78	21.46	21.47	19.3	10.6	10.48	9.8	14.83	15.52	12.91	16.05	12.09	11.48	10.86	12.29	10.71	13.24	11.87	12.22	16.02	17.84	17.66	17.25	20.05	18.35	20.3	21.53	20.11	13.25
XLOC_001339	1.4	1.49	1.36	1.63	1.94	2.09	1.32	1.78	0.2	0.35	0.4	0.23	0.44	0.42	0.42	0.38	0.3	0.63	0.39	0.59	0.69	0.42	0.6	0.5	0.44	0.2	0.39	0.38	0.83	0.45	0.66	0.22	0.53	0.43	0.58	0.5	0.51	0.25	0.46	0.14	0.51	0.34	0.39	0.52	0.28	0.29	0.45	0.46	0.35
XLOC_001340	0	0	0.04	0	0	0	0.11	0	0.07	0.68	0	0.28	3.87	0.23	0.36	0.17	0	0	0	0	0	0	0	0	0	0.03	0.13	0.12	0	0	0	0	0.04	0.13	0	0	0.2	0	0	0	0	0.13	0.03	0	0	0	0	0.08	0
XLOC_001341	2.62	2.26	2.44	2.21	2.03	2.41	1.9	2.57	1.54	1.32	1.82	1.35	1.63	1.71	1.44	1.59	2.08	2.23	1.97	2.1	1.86	2.01	1.94	2.01	1.82	1.45	1.73	1.39	1.23	1.6	1.02	1.79	1.78	1.63	1.24	0.85	0.89	1.02	1.26	0.76	2.07	1.92	2.02	2.1	1.95	1.77	1.85	1.78	2
XLOC_001342	12.04	11.32	22.5	12.51	10.64	15.63	13.96	12.94	7.11	6.96	11.59	7.18	5.28	6.8	6.12	7.11	7.11	4.27	8.99	6.06	4.54	7.27	7.71	8.02	8.87	6.69	9.76	8.06	5.9	7.62	10.75	8.08	7.54	8.8	17.91	9.56	7.09	9.11	10.86	9.57	9.13	9.56	13.31	10.19	10.05	12.7	10.26	9.91	6.02
XLOC_001343	16.05	17.75	22.81	17	17.72	21.17	14.03	25.21	26.71	24.1	33.79	28.61	34.1	32.26	33.7	33.29	22.79	28.39	27.03	25.26	26.05	24.69	30.53	30.3	23	19.67	20.1	24.87	22.6	20.7	20.04	25.35	21.62	27.12	26.49	32.74	23.41	23.41	28.4	23.59	18.35	25.63	30.22	24.5	25.56	27.98	33.25	31.21	20.47
XLOC_001344	2.41	2.19	1.78	2.06	2.81	4.33	3.33	2.47	1.71	1.57	1.82	1.18	1.13	1.83	1.23	1.54	1.13	0.95	1.41	2.35	1.73	1.93	1.97	2.23	0.78	1.08	2.1	2.15	1.15	3.18	2.01	2.45	2.3	0.94	0.95	0.87	1.15	1.77	1.32	1.5	2.48	1.74	1.92	1.7	2.03	1.99	0.86	2.02	1.65
XLOC_001345	0	0	0	0	0.04	0	0	0	0.05	0.47	0.04	0.04	0.02	0.04	0.09	0.05	0	0.03	0	0	0.04	0	0	0	0	0	0.02	0	0.15	0	0	0	0.25	0.29	0.37	0.34	0.1	0.77	0.05	0.22	0	0	0	0	0	0.02	0	0.05	0.09
XLOC_001346	0.12	0.49	0.7	0.1	0.09	0.73	0.14	1.05	0.16	0.75	1.6	0.03	0.51	0.57	0.45	1.65	0.14	0.37	1.88	0.03	0.11	0.59	0.22	0.83	0.03	0.17	1.14	0	0.25	0.85	0.31	0.78	0.15	0.45	1.68	0	0	0.16	0.42	1.17	0.44	0.52	1.6	0.08	0	0.95	0.12	1.5	0.1
XLOC_001347	0	0	0	0	0	0	0	0	0	0	0	0	0	0	0	0	0	0	0	0	0	0	0	0	0	0	0	0	0	0	0	0	0	0	0	0	0	0	0	0	0	0	0	0	0	0	0	0	0
XLOC_001348	0.11	0.22	0	0.04	0	0.14	0.1	0.05	0	0.06	0.37	0.09	0.03	0.03	0.03	0	0.04	0	0.11	0.11	0	0.13	0.22	0.24	0.19	0	0.19	0	0	0.03	0	0.44	0	0.08	0.05	0	0.14	0.17	0.13	0.19	0	0.12	0.03	0	0.39	0	0.19	0	0.06
XLOC_001349	19.13	16.8	15.21	17.59	16.71	24.82	16.99	18.94	16.49	14.46	15.91	15.81	15.06	13.02	13.81	14.15	18.64	17.97	25.9	26.2	19.81	29.1	26.72	25.04	14.82	11.88	15.64	21.52	15.08	17.5	22.16	15.98	14.39	12.54	12.83	11.1	11.45	15.91	12.86	13.5	17.42	17.11	17.57	21.08	15.37	17.75	19.84	17.73	19.83
XLOC_001350	1.58	1.79	0.79	1.82	2.5	1.84	1.36	0.97	1.01	1.16	0.95	1.76	2.95	2.14	1.29	0.66	1.72	1.62	0.56	1.34	1.52	0.92	0.9	0.24	0.44	0.89	0.68	0.64	1.09	1.13	0.33	0.65	1.17	1.6	0.42	1.41	0.95	2.03	1.31	0.97	1.16	1.58	1.06	1.73	1.63	1.32	2.03	0.47	1.05
XLOC_001351	0.51	0.88	0.35	0.53	0.72	0.41	0.33	0.53	0.36	0.13	0.18	0.34	0.23	0.25	0.1	0.27	0.72	0.27	0.33	0.43	0.53	0.42	0.3	0.56	0.37	0.49	0.08	0.47	0.18	0.13	0.03	0.39	0.37	0.11	0.19	0.39	0.41	0.17	0.38	0.16	0.34	0.11	0.32	0.15	0.11	0.49	0.27	0.2	0.37
XLOC_001352	10.29	14.01	10.99	10.86	8.69	10.61	11.23	12.37	2.39	2.49	2.24	2.15	3.58	3.73	3.8	3.58	2.5	5.85	3.56	3.07	2.9	3.55	3.57	3.38	3.59	4.11	3.57	2.29	1.97	4.01	1.97	3.52	4.76	5.8	3.33	3.19	1.51	2.64	3.09	1.82	5.7	8.97	6.09	6.38	5.43	4.59	3.06	5.12	3.76
XLOC_001353	8.38	7.38	5.47	4.83	5.56	6.63	5.04	4.57	12.19	15.67	11.96	9.33	10.27	8.48	10.27	10.55	18	14.33	12.63	12.12	13.86	12.55	15.78	13.66	14.73	14.38	10.02	10.6	13.25	10.93	9.48	8.64	10.96	10.5	8.71	7.62	13.79	12.15	12.79	11.04	10.74	8.82	7.1	5.73	9.41	6.37	7.87	7.53	16.3
XLOC_001354	0.26	0.18	0.09	0.1	0.14	0.12	0.12	0.19	0.1	0.14	0.25	0.14	0.09	0.15	0.08	0.08	0.39	0.61	0.34	0.56	0.58	0.43	0.7	0.56	0.25	0.23	0.67	0.79	0.27	0.35	0.22	0.32	0.11	0.3	0.07	0.15	0.08	0.06	0.23	0.13	0.47	0.65	0.28	0.64	0.44	0.57	0.51	0.7	0.4
XLOC_001355	0.08	0.6	0.06	0.26	0.32	0.42	0.52	0.07	0.14	0.3	0.04	0.47	0.13	0.05	0.04	0.05	0	0.12	0.08	0.08	0.22	0.1	0.13	0.21	0.05	0.09	0.09	0.08	0.15	0.14	0.74	0.2	0.12	0.3	0	0.63	0.07	0.84	0.09	0.36	0.4	0.44	0.27	0.12	0.29	0.1	0.27	0.49	0
XLOC_001356	5.13	7.5	5.71	5.57	4.24	4.68	5.48	4.82	1.86	2.1	1.2	1.19	1.27	1.38	1.55	1.72	1.13	1.46	1.1	1.44	0.76	0.66	1.25	1.15	1.45	1.58	1.64	1.28	0.92	1.02	0.93	1.08	1.16	1.75	1.16	1.56	0.67	1.09	1.67	1.43	0.82	1.8	1.57	0.97	1.14	0.95	0.93	0.71	0.53
XLOC_001357	0	0.08	0	0	0	0	0.05	0	0	0	0.09	0	0.03	0	0	0	0	0	0.47	0	0.05	0	0	0	0.03	0	0	0	0	0	0	0	0	0.04	0	0.17	0	0	0	0	0	0	0	0	0	0	0	0	0
XLOC_001358	85.31	59.46	88.85	55.13	16.81	30.21	24.82	37.29	18.53	14.29	24.69	16.4	15.25	25.29	9.72	13.57	132.72	34.75	57.71	38.04	154.43	71.11	41.11	68.16	16.82	21.24	25.57	13.56	41.59	20.66	12.05	35.77	19.19	33.65	423.82	259.58	196.34	83.98	145.89	63.82	9.76	5.33	20.88	9.72	13.9	28.07	6.3	10.07	134.33
XLOC_001359	2.3	2.69	1.31	2.43	1.85	3.01	2.28	2.01	2.71	3.46	3.12	3.33	4.16	4.94	3.07	3.85	3.75	4.41	4.65	3.34	3.27	5.8	3.39	5.49	2.01	3.24	4.56	4.48	2.47	4.86	3.89	2.38	3.17	3.01	2.48	3.18	2.98	3.18	3.28	3	5.89	4.69	5.55	3.66	2.95	7.06	4.94	4.88	3.47
XLOC_001360	0.15	0.43	0.46	0.08	0.19	0.42	0.45	0.48	0.69	0.59	0.87	0.96	1.17	1.47	0.71	0.94	0.87	1.02	0.6	1	1.11	1.31	0.35	0.59	0.44	0.27	0.64	0.66	0.37	0.82	0.71	1.06	0.6	1.13	0.78	0.48	0.51	0.2	0.85	0.28	1.52	1.37	1.27	1.02	1.11	1.12	0.73	0.73	1.11
XLOC_001361	0.21	0.36	0.5	0.42	0.31	0.28	0.05	0.09	0	0.17	0.03	0	0	0	0.03	0	0.21	0.08	0.32	0.31	0.1	0.26	0	0.09	0.09	0	0	0.22	0	0.06	0.11	0	0.08	0.04	0	0	0	0	0	0	0.15	0.09	0.03	0.16	0.03	0	0	0.18	0.3
XLOC_001362	10.04	13.78	10.55	13.16	8.36	14.06	6.87	11.07	4.76	6.14	4.7	4.62	7.53	11.92	5.23	4.85	4.9	3.57	3.92	2.69	4.15	6.6	3.71	5.45	4.4	5.24	3.61	2.74	5.24	4.75	2.43	3.55	7.46	8.27	8.48	8.93	4.92	11.05	5.58	5.58	5.28	5.61	4.47	3.79	6.03	6.13	3.83	5.03	5.48
XLOC_001363	1.19	0.35	1.47	0.63	2.45	0.78	1.46	1.35	0.4	0.21	0.82	0.18	0.37	0.64	1.07	0.46	0.52	0.24	0.8	0.28	0.26	0.76	1.67	0.39	0.64	0.56	0.7	0.32	1.45	0.98	0.55	0.66	0.98	0.21	0.74	0.06	0.19	0.47	0.85	0.51	1	0.34	0.67	1.03	0.44	1.06	1.12	1.08	0.9
XLOC_001364	0.51	0.46	0.58	0.73	0.42	0.58	0.74	0.56	0.17	0.18	0.13	0.25	0.16	0.02	0.14	0.24	0.13	0.12	0.04	0.12	0.19	0	0.17	0.11	0.07	0.16	0.33	0.11	0.16	0	0.11	0.16	0.46	0.19	0.08	0.21	0	0	0.39	0.33	0.54	0.49	0.09	0.19	0.7	0.59	0.11	0.14	0.05
XLOC_001365	0.33	0.15	0.4	0.32	0	0	0.1	0.07	0.3	0.12	0.13	0.14	0.1	0.04	0.1	0.17	0.46	0.03	0	0.5	0	0.18	0.23	0.06	0.19	0.02	0.02	0	0.25	0.46	0.04	0.05	0.78	0.08	0.24	0.22	0.16	0	0.09	0	0.14	0.08	0.12	0.35	0	0.49	0.3	0.05	0.33
XLOC_001366	0	0	0	0	0	0	0	0	0.13	0.39	0.1	0.02	0.14	0.04	0.19	0.26	0.34	0.56	0.23	0.47	0.57	0.59	0.77	0.45	0.21	0.33	0.4	0.25	0.79	0.69	0.36	0.21	1.4	0.91	1.46	0.47	0.96	1.04	1.25	0.63	0.7	1.33	1.44	2.29	2.78	1.23	2.33	2.25	0.55
XLOC_001367	0.97	0.96	0.75	0.77	1.17	0.9	0.48	1.45	1.09	0.94	1.2	0.95	0.97	1.43	0.54	1.6	1.32	1.12	1.36	1.02	0.54	1.45	1.07	1.08	0.75	0.98	1.17	1.01	0.7	0.58	0.76	0.32	0.54	0.33	0.21	0.58	1.54	0.62	0.43	0.59	1.27	1.22	1.54	1.92	0.66	1.26	1.77	2.02	0.76
XLOC_001368	0.36	0.43	0.33	0.52	0.57	0.29	0.12	0.34	0.46	0.53	0.55	0.6	0.74	0.69	0.16	0.42	0.27	0.35	0.2	0.48	0.49	0.55	0.13	0.33	0.24	0.27	0.42	0.58	0.41	0.32	0.05	0.27	0.25	0.25	0.81	0.58	0.28	0.38	0.31	0.27	0.36	0.25	0.35	0.43	0.45	0.42	0.26	0.33	0.65
XLOC_001369	0.48	0.46	0.29	0.11	0.07	0.18	0.38	0.3	0.36	0.5	0.32	0.32	0.7	0.31	0.08	0.28	0.74	0.54	0.21	0.13	0.43	0.08	0.16	0.76	1.8	0.86	0.23	0.25	0.55	0.49	0.29	0.25	1.09	0.86	0.32	0.27	0.18	0.35	0	0.46	0.41	0.3	0.11	0.34	0.44	0.16	0.09	0.28	0.54
XLOC_001370	12.18	9.45	9.83	9.57	13.71	10.91	12.8	9.54	15.71	15.77	19.68	16.66	10.48	11.78	12.09	14.15	25.65	18.76	27.98	20.8	18.62	19.45	18.9	17.51	19.29	14.69	12.53	19.74	14.28	13.18	19.77	14.2	15.23	10.55	6.78	8.27	9.64	7.1	7.13	9.75	18.81	17.72	16	18.02	14	13.07	13.96	12.58	20.46
XLOC_001371	0	0.12	0.1	0.07	0.04	0	0.13	0.24	0	0.05	0.09	0.12	0.02	0	0	0.29	0	0.03	0	0	0.12	0.06	0.14	0	0	0	0.03	0	0.06	0	0	0.06	0.1	0.24	0.17	0	0.04	0	0.16	0	0	0.27	0	0.37	0	0.08	0.31	0.03	0
XLOC_001372	0.2	0.75	0.47	0.44	0.64	0.52	0.23	0.75	0.09	0.05	0.29	0.21	0.3	0.42	0.28	0.26	0.39	0.21	0.05	0.24	0.09	0.06	0.16	0.26	0.11	0.36	0.25	0.26	0.16	0.12	0.27	0.52	0.36	0.11	0.09	0.1	0.09	0.41	0	0	0.19	0.27	0.14	0.96	0.59	0.3	0.03	0.41	0.34
XLOC_001373	0.06	0.29	0.45	0.39	0.61	0.91	1.54	0.66	0.58	0.72	1.32	0.52	0.5	0.49	1.3	0.93	0.24	0.22	1.26	0.36	1.18	0.53	0.79	0.48	0.21	0.75	0.45	0.55	0.12	0.56	0.9	0.46	0.81	0.78	1.63	1.03	1.33	1.48	1.73	0.84	0.07	0.17	0.42	0.53	0.37	0.34	0.88	0.38	0.42
XLOC_001374	181.41	224.06	199.88	265.63	429.05	287.27	397.96	310.64	126.71	125.1	139.29	162.63	127.78	72.81	72.38	125.31	121.51	97.48	205.42	207.93	214.28	225.12	191.5	188.36	167.35	121.57	207.86	319.75	311.8	245.46	381.99	315.21	137.18	123.71	118.46	202.63	257.13	185.7	176.26	183.68	298.1	275.96	225.69	244.44	288.62	349.02	304.21	296.94	130.05
XLOC_001375	1.27	1.68	0.98	1.84	1.05	2.06	1.26	1.52	1.01	0.53	0.71	0.38	0.74	0.69	0.22	0.65	1.09	0.43	0.77	0.3	0.64	0.74	0.73	0.61	0.57	0.47	0.31	0.45	0.63	0.48	1.47	0.37	0.51	0.49	1.37	0.45	0.87	1.57	0.65	0.86	0.42	0.53	0.74	1.1	0.81	0.67	1.17	0.89	0.91
XLOC_001376	0.1	0.07	0.11	0.12	0.05	0.26	0.05	0.18	0.27	0.58	0.34	0.4	0.08	0.17	0.5	0.2	0.04	0.4	0.61	0.34	0.32	0.55	0.72	0.61	0.42	0.03	0.48	0.58	0.44	0.39	0.14	0.28	0.15	0.26	0.24	0.15	0.13	0.78	0.35	0.68	0.11	0.06	0.17	0.46	0.18	0.21	0.31	0.21	0.17
XLOC_001377	1.82	1.87	1.56	1.56	1.79	2.73	2.08	1.83	1.48	1.55	2.1	1.56	0.67	1.14	0.79	0.71	1.86	1.41	2.29	1.73	1.88	2.64	2.2	1.73	1.41	1.27	1.25	1.33	1.88	1.15	1.46	0.6	1.43	1.53	1.8	0.82	1.78	2.7	1.54	1.39	1.41	1.76	1.55	2.01	0.85	1.66	1.84	0.77	2.06
XLOC_001378	0.68	0.37	0.45	0.43	0.13	0.31	0.41	0.24	0.08	0.12	0.28	0.02	0.05	0.1	0.2	0.26	0.03	0.03	0.14	0.04	0	0.11	0	0.08	0	0.05	0.03	0	0	0.24	0.1	0.11	0.07	0.03	0.08	0.04	0.08	0.19	0.16	0.05	0.17	0.07	0.1	0.27	0.13	0.08	0.06	0.06	0.1
XLOC_001379	0.59	1.05	0.67	0.9	1.09	0.96	1.3	1.03	0.39	0.49	0.43	0.35	0.24	0.38	0.34	0.39	0.38	0.26	0.18	0.5	0.35	0.47	0.7	0.46	0.13	0.23	0.3	0.31	0.64	0.37	0.79	0.32	0.45	0.55	0.22	0.43	0.24	0.35	0.57	0.32	0.3	0.34	0.29	0.66	0.34	0.59	0.3	0.4	0.26
XLOC_001380	8.64	7.99	6.49	7.87	9.66	9.71	7.96	10.69	3.63	2.88	4.67	3.55	4.34	4.57	3.95	5.47	5.34	3.51	7.5	7	10.75	10.17	9.5	14.8	5.72	4.13	5.99	7.16	8.42	8.8	10.1	12.64	4.99	5.31	4.6	4.67	5.05	5.87	5.22	7.72	7.18	5.29	8.58	8.52	15.54	9.24	11.12	13.96	6.04
XLOC_001381	2.86	3.16	2.4	3.12	3.14	3.7	2.25	3.98	1.15	1.25	0.9	1.04	1.68	1.45	1	1.42	0.77	0.99	1.75	1.46	1.23	1.93	1.5	1.88	0.73	1.07	1.13	2.1	1.29	1.72	0.86	1.17	1.26	0.97	1.91	0.93	0.68	1.53	1.58	1	1.6	1.94	2.03	2.24	1.68	1.74	2.13	2.46	0.87
XLOC_001382	1.65	2.44	1.25	1.88	3.67	1.98	1.21	2.59	0.99	1.76	2.42	1.57	1.74	1.68	2.18	1.1	1.44	1	1.24	1.49	1.5	1.34	1.52	2	1.02	1.14	0.9	1.67	1.4	1.42	1.59	2.05	1.38	0.66	1.43	1.08	2.22	1.4	1.23	1.63	0.79	1.14	1.31	1.03	2.31	2.07	2.27	1.44	1
XLOC_001383	0.92	1.82	1.39	1.06	1.53	2.07	1.41	3.69	1.45	1.25	1.36	1.84	1.39	2.46	0.94	1.19	0.64	0.97	1.81	1.77	0.73	1.63	1.03	1.51	0.88	0.47	0.78	0.59	0.93	1.55	1.57	1.76	0.72	1.31	1.54	1.59	0.57	1.58	1.36	1.22	1.3	1.55	2.63	5.71	3.95	5.29	4.19	4.85	1.17
XLOC_001384	7.5	8.77	4.9	8.51	4.84	4.79	4.3	5.8	4.65	3.66	4.37	6.44	5.85	5.17	6.15	5.88	1.6	1.78	2.35	2.15	1.22	2.18	1.89	1.72	2.46	1.98	2.85	3.1	2.78	2.56	2.07	1.77	6.02	4.89	6.99	10.87	4.5	6.69	7.46	4.67	2.9	2.18	3.58	3.11	2.75	1.92	2.72	1.8	2.87
XLOC_001385	1.76	1.74	0.68	1.68	1.13	1.57	2.25	2.06	2.25	3.89	2.52	3.05	2.78	2.5	5.01	5.26	2.38	2.28	1.92	2.69	3.31	2.97	4.74	4.46	2.12	2.24	2.13	2.49	2.81	2.86	4.7	3.51	2.27	2.83	3.02	3.83	3.49	4.99	7.09	7.25	2.57	2.2	1.73	1.87	2.8	2.53	4.25	3.59	2.16
XLOC_001386	4.66	3.24	9.97	5.05	4.11	3.88	4.72	6.95	6.36	6.6	7.74	6.37	8.19	7.51	8.79	9.39	6.76	9.58	5.29	6.22	5.94	6.51	7.55	6.06	6.36	6.7	6.94	6.04	4.2	6.8	5	5.67	5.16	6.27	6.3	4.86	6.39	5.58	6.25	6.87	4.81	5.77	4.55	3.86	4.73	4.5	5.28	6.44	6.14
XLOC_001387	0.54	0.58	0.45	0.49	0.53	0.59	0.6	0.48	0.58	0.52	0.46	0.44	0.46	0.18	0.42	0.48	0.37	0.37	0.26	0.39	0.23	0.38	0.45	0.19	0.22	0.08	0.13	0.12	0	0.15	0.29	0.09	0.37	0.13	0.48	0.47	0.37	0.62	0.36	0.38	0.33	0.33	0.37	0.46	0.52	0.7	0.29	0.62	0.38
XLOC_001388	2.55	2.04	2.17	2.08	2.05	3.94	2.56	3.22	1.04	0.73	1.17	0.94	0.96	0.26	0.94	0.63	1.31	1.32	1.25	1.96	1.33	1.41	0.92	1.79	0.22	0.55	1.3	1.25	0.48	0.88	1.29	1.95	1.12	0.86	1.16	0.45	0.73	1.2	0.81	0.26	1.41	0.68	1.47	1.68	1.33	1.16	0.89	2.67	1.22
XLOC_001389	0.18	0.32	0.34	0.52	0.29	0.1	0.05	0	0.17	0.72	0.03	0.25	0	0.07	0.4	0.24	0.23	0.13	0	0.06	0	0	0.19	0.1	0.23	0.72	0.27	0.12	0	0	0.19	0.07	0.13	0.18	0	0.12	0	0.12	0.28	0.47	0.07	0.07	0	0	0	0.22	0.16	0	0
XLOC_001390	9.23	10.05	8.34	7.6	10.14	8.08	6.31	9.33	8.21	8.54	11.08	7.3	5.35	4.51	6.62	7.57	11.73	12.26	15.18	14.36	16.6	16.01	16.96	18.55	14.32	16.46	21.63	20.67	26.58	18.43	29.07	22.93	14.69	14.46	15.2	13.34	12.7	11.31	12.33	15.05	9.83	8.44	15.02	14.27	14.63	11.09	14.23	15.52	12.93
XLOC_001391	21.55	20.36	19.35	23.02	20.29	26.04	22.74	26.2	12.95	13.13	13.39	11.77	10.71	10.76	16.25	11.26	8.97	6.95	10.15	11.5	11.28	14.79	14.11	12.49	7.05	6.97	10.63	9.93	12.73	16.26	15.22	14.64	12.8	15.87	18.43	11.15	19.55	27.75	21.53	21.09	8.73	7.38	14.56	12.31	11.71	13.9	21.52	16.62	9.91
XLOC_001392	10.9	9.77	13.04	8.92	10.92	9.47	10.59	9.28	14.92	14.77	13.7	11.29	12.25	13.49	12.91	13.63	10.59	11.91	9.3	10.23	7.84	10.32	12.55	9.83	9.02	9.22	10.43	9.39	9.71	9.26	8.77	8.03	10.92	10.54	12.72	9.99	12.65	13.4	12.63	11.79	9.13	9.64	10.75	10.03	10.74	12.3	12.96	9.07	7.16
XLOC_001393	7.87	7.08	7.02	9.11	8.37	8.6	8.45	7.17	4.79	4.4	4.96	5.39	5.22	4.78	5.02	5.51	4.49	4.24	5.32	3.77	4.87	4.57	5.41	5.31	4.24	3.15	3.64	4.66	4.22	4.66	4.57	4.84	4.37	3.85	3.71	4.25	3.33	5.41	4.69	4.17	4.5	4.86	3.26	5.4	4.89	4.58	4.2	3.83	4.74
XLOC_001394	0.5	0.48	0.62	0.43	0.7	1.05	0.43	0.73	0.35	0.34	0.37	0.52	0.39	0.38	0.43	0.6	0.42	0.45	0.74	0.53	0.97	0.38	0.7	0.61	0.26	0.13	0.59	0.63	0.33	0.56	0.55	0.72	0.32	0.34	0.1	0.02	0.2	0.22	0.44	0.31	0.34	0.2	0.33	0.35	0.31	0.48	0.47	0.5	0.43
XLOC_001395	0.53	0.96	1.06	0.5	0.72	1	0.68	0.7	0.37	0.89	0.57	0.45	0.37	0.48	0.5	0.46	0.32	0.04	0.37	0.46	0.19	0.58	0.33	0.5	0.24	0.06	0.59	0.36	0.36	0.31	0.45	0.32	0.34	0.23	1.13	0.77	0.05	0.33	0	1.01	0.52	0.4	0.35	0.4	0.22	0.51	0.32	0.61	0.24
XLOC_001396	1.42	1.97	1.8	1.68	1.5	1.55	1.33	1.84	1.07	1.06	1.1	1.64	1.33	1.45	1.48	1.63	1.69	1.53	1.35	1.92	1.55	1.56	2.53	1.52	1.17	1.24	1.42	1.5	1.28	1.37	0.98	1.94	1.17	1.87	2.24	1.75	1.03	1.85	1.74	1.68	1.8	2.04	1.57	1.61	2.39	2.05	2.57	1.93	1.54
XLOC_001397	0.03	0.15	0.05	0.1	0.13	0.11	0.18	0.11	0.19	0.1	0.07	0.17	0.03	0.04	0.32	0.09	0.25	0.16	0.45	0.12	0.09	0.23	0.1	0.44	0.02	0.19	0.29	0.07	0.26	0.4	0.62	0.33	0.05	0.24	0.33	0.25	0.25	0.26	0.37	0.25	0.16	0.14	0.05	0.21	0.17	0.38	0.09	0.35	0.25
XLOC_001398	0.05	0.07	0	0	0	0	0.19	0.09	0.03	0	0.05	0	0.06	0.03	0	0.03	0	0	0	0.05	0.09	0	0.04	0.09	0	0	0.09	0	0.19	0.18	0	0	0	0.11	0.24	0	0.09	0	0.48	0	0.03	0.03	0	0.03	0.06	0	0	0	0
XLOC_001399	0.07	0.29	0.05	0.06	0.14	0.25	0.2	0.13	0.63	0.79	0.75	0.65	0.31	0.12	0.44	0.12	0.78	0.31	0.95	0.63	0.59	0.7	0.86	1.29	0.4	0.79	0.73	1.08	0.58	0.43	0.42	0.26	0.78	0.27	0.27	0.14	0.25	0.15	0.67	0.73	0.71	0.51	0.2	0.29	0.55	0.65	0.73	0.54	1.05
XLOC_001400	4.14	3.76	5.33	6.85	4.21	7.53	3.4	4.87	2.17	2.74	4.05	2.78	2.89	4.13	1.7	1.97	4.21	2.92	5.91	4.41	5.47	7.82	3.68	3	3.06	2.14	3.39	3.65	3.46	4.54	3.84	3.41	3.84	2.16	4.15	3.53	2.93	4.74	2.94	1.7	6.79	3.42	7.42	6.44	5.02	8.21	5.29	6.31	3.19
XLOC_001401	6.38	6.88	6.99	7.02	6.71	8.41	6.83	6.62	3.5	3.66	3.66	3.98	4.82	5.19	4.44	4.8	4.2	4.91	4.61	3.58	4.73	4.56	3.87	4.41	3.71	3.29	3.85	3.32	3.64	3.95	5.62	3.47	3.06	3.29	3.76	3.44	3.77	3.58	3.99	3.42	4.61	3.97	3.92	4.26	3.64	5.46	3.61	4.93	3.32
XLOC_001402	2.48	3.41	2.72	3.79	3.19	3.33	3.69	3.33	1.47	1.96	1.76	1.71	1.83	2.02	1.48	1.94	2	1.91	2.16	2.46	2.1	2.94	1.27	2.14	1.67	1.42	1.46	2.05	1.54	1.85	2.84	1.85	1.78	1.62	1.6	1.36	1.83	1.6	1.41	1.32	2.69	2.29	2.48	2.83	2.25	3.15	2.64	2.71	1.91
XLOC_001403	0	0.06	0.13	0.07	0.27	0	0.25	0.08	0.08	0	0.14	0.22	0.25	0.05	0.05	0.13	0	0.03	0.14	0.27	0.13	0.06	0.07	0.16	0.13	0.25	0.21	0.26	0	0.06	0.1	0.57	0.07	0.17	0.17	0.45	0	0.19	0	0.31	0	0.1	0.31	0.28	0.16	0.08	0.06	0.78	0
XLOC_001404	0.48	0.73	0.43	0.76	0.44	0.57	0.5	0.61	0.39	0.51	0.56	0.35	0.49	0.36	0.27	0.42	0.19	0.39	0.36	0.35	0.27	0.4	0.45	0.57	0.34	0.36	0.2	0.37	0.34	0.41	0.26	0.13	0.17	0.27	0.39	0.5	0.36	0.31	0.38	0.47	0.31	0.38	0.77	0.47	0.41	0.24	0.29	0.53	0.27
XLOC_001405	0.73	0.44	0.64	0.33	0.19	0.8	0.56	0.99	0.14	0.3	0.42	0.26	0.37	0.33	0.42	0.64	0.21	0.16	0.16	0.22	0.14	0.37	0.34	0.33	0.11	0.13	0.32	0.3	0.14	0.46	0.52	0.07	0.44	0.68	0.29	0.94	0.3	0.36	0.36	0.26	0.08	0.59	0.69	0.45	0.32	0.49	0.44	0.18	0.13
XLOC_001406	2.97	2.45	3.5	3.5	2.49	2.94	1.87	3.4	2.09	1.33	1.43	2.76	2.55	2.17	2.61	3.57	0.84	1.04	0.44	1.77	0.46	1.15	1.44	1.43	1.22	0.68	0.86	1.47	0.63	0.78	0.12	1.11	1.21	1.72	1.42	1.14	1.81	1.8	1.43	1.23	1.36	1.59	2.36	1.02	1.29	3.14	0.54	1.97	0.82
XLOC_001407	0.54	0.44	0.53	1.6	1.36	1.15	0.86	0.74	1.22	0.94	1.36	0.89	0.45	1.43	0.49	0.69	1.72	0.46	0.7	2.02	0.36	1.74	1.06	0.42	1	0.6	0.56	1.59	0.31	1.62	0.96	0.52	1	0.92	1.39	2.18	1.06	2.51	1.32	1.23	1.88	0.16	0.78	1.85	0.38	2.68	1.34	0.47	0.84
XLOC_001408	4.34	4.73	3.73	3.91	4.94	5.21	5.72	5.49	5.22	4.96	5.45	3.57	4.46	4.05	3.56	4.52	4.14	3.86	4.96	4.38	4.64	4.38	5.6	4.76	3.75	2.6	3.92	3.9	3.42	3.19	3.89	3.49	3.53	3.84	4.77	4.37	4.19	4.14	4.98	5.52	4.03	4.17	4.36	4.21	4.9	3.66	5.45	4.2	4.57
XLOC_001409	0.35	0.31	0.22	0.36	0.17	0.21	0.26	0.25	0.08	0.47	0.13	0.37	0.28	0.2	0.21	0.18	0.8	0.4	0.35	0.71	0.35	0.21	0.5	0.48	0.84	0.7	0.41	0.45	0.82	0.68	0.11	0.11	0.3	0.1	0.45	0.07	0.06	0.86	0.4	0.12	1.26	0.63	0.18	0.49	0.43	0.36	0.19	0.24	0.47
XLOC_001410	0.95	0.76	0.59	0.69	1.07	0.56	0.42	0.59	0.92	0.65	1.07	0.39	0.52	0.27	0.95	0.58	3.19	1.97	2.7	1.74	2.47	1.46	1.86	1.76	3.62	2.19	1.96	1.51	1.96	1.1	2.26	1.59	1.94	1.11	1.39	1.14	1.18	1	0.93	0.92	3.18	1.89	0.96	0.64	2.27	1.32	1.63	1.15	3.01
XLOC_001411	0	0.01	0.01	0.14	0.05	0.05	0.4	0.03	0.1	0.15	0.14	0.26	0.65	0.49	0.49	0.28	0.15	0.24	0.1	0.12	0.25	0.08	0.17	0.13	0.17	0.22	0.16	0.25	0.07	0.05	0.08	0.07	0.19	0.27	0.02	0.23	0.17	0.04	0.23	0.04	0.08	0.08	0.02	0.03	0.06	0.12	0.07	0.05	0.18
XLOC_001412	0.51	0.65	0.5	0.41	0.54	0.41	0.37	0.59	0.19	0.06	0.15	0.08	0.38	0.15	0.08	0.11	0.23	0.05	0.22	0.18	0.23	0.09	0.18	0.22	0.1	0	0.29	0.13	0.25	0.02	0.2	0.07	0.03	0	0.28	0.07	0.51	0.11	0.17	0.04	0.26	0.06	0.06	0.09	0.02	0	0	0	0.25
XLOC_001413	0.12	0.14	0.13	0.07	0.09	0.08	0.17	0.19	0.26	0.27	0.08	0.16	0.21	0.02	0.07	0	0.07	0.11	0.12	0.12	0.22	0.04	0.14	0.08	0	0.07	0.14	0.22	0.23	0.07	0	0.06	0.02	0.11	0.11	0.15	0.23	0	0.07	0	0	0.07	0.13	0.21	0.02	0	0	0.04	0.07
XLOC_001414	3.75	3.09	2.32	3.43	2.59	2.69	2.69	3.71	1.87	1.64	2.7	1.39	0.88	1.05	0.98	0.92	4.92	4.13	3.68	5.05	3.39	3.56	2.98	3.46	2.91	2.08	1.56	3.91	1.85	2.32	2.09	2.07	3.41	2.12	1.63	1.78	1.15	1.61	1.72	1.76	5.03	8.08	5.11	6.94	2.88	3.91	4.38	5.26	4.77
XLOC_001415	0	0	0	0.05	0.45	0.25	0.05	0.1	0.07	0.09	0.09	0.24	0.22	0	0.19	0.23	0.13	0.29	0.17	0.28	0.52	0.14	0.18	0.3	0.93	0.69	0.45	1.22	0.75	0.69	0.93	0.92	0.08	0	0.64	0.67	0.35	0.53	0.4	0.26	0	0.35	0.03	0.12	1.23	0.59	0.94	0.35	0
XLOC_001416	0.07	0.4	0.08	0.59	0.18	0.48	0.17	0.17	1.2	0.67	0.39	1.15	1.29	1.41	1.28	1.62	0.92	1.04	0.68	0.87	1.35	1.54	1.37	1.76	0.46	0.39	0.61	1.03	0.19	1.6	1.3	1.15	0.59	0.5	1.08	1.28	1.22	2.36	1.56	1.26	0.54	1.29	0.42	1.34	0.69	0.36	0.81	0.76	0.97
XLOC_001417	0.03	0.02	0.05	0	0.03	0.09	0	0	0.04	0.16	0.04	0.04	0.06	0	0.13	0.02	0	0.02	0.07	0.07	0.03	0	0.06	0.03	0	0	0.2	0	0.11	0.02	0.19	0	0.03	0	0.45	0.24	0.39	0	0.08	0	0.06	0	0.23	0	0	0.08	0	0	0.04
XLOC_001418	9.6	9.73	9.37	12.11	11.31	14.58	10.39	10.35	9.76	12.74	12.97	10.2	7.01	7.95	8.36	9.02	13.65	16.16	20.62	19.5	15.4	20.68	16.23	18.92	12.05	12.12	12.49	14.02	12.29	15.94	21.36	13.64	13	13.65	11.58	12.17	10.36	15.87	11.92	14.3	19.39	19.39	20.88	21.86	18.84	19.18	18.56	21.54	15.39
XLOC_001419	0.12	0.08	0.56	0.33	0.12	1.08	0.16	0.11	0.28	0.25	0	0	0.06	0	0.13	0.14	0.05	0.09	0	0	0.22	0	0.1	0.26	0	0.16	0.13	0	0.15	0	0.03	0.11	0.09	0.04	0.78	0.06	0.36	0.19	0.62	0.4	0	0.07	0.33	0.06	0.07	0	0.16	0	0
XLOC_001420	0.62	0.86	0.13	0.56	0.22	0.3	0.53	0.43	0.52	0.37	0.02	0.12	0.59	0.37	0.24	0.33	0.07	0	0.18	0.04	0.04	0.32	0.03	0.3	0.39	0.19	0.12	0.23	0.44	0.26	0.64	0.13	0.29	0.13	0.29	0.09	0.23	0.32	0.31	0.05	0.17	0.05	0.25	0.49	0.26	0.11	0.18	0.21	0
XLOC_001421	8.04	9.79	10.65	9.93	9.94	11.47	9.2	11.09	8.43	8.87	8.88	8.79	10.4	11.1	8.7	9.85	8.03	11.06	9.6	8.84	8.98	8.46	8.55	9.55	5.89	7.11	8.03	8.34	7.57	6.7	8.09	6.84	6.98	6.15	6.95	6.29	5.91	6.35	8.71	8.01	8.48	9.99	9.18	9.87	9.3	9.63	10.42	9.34	6.53
XLOC_001422	4.78	4.8	5.41	5.32	5.04	6.62	7.34	6.87	11.85	13.12	17.13	12.57	11.03	15.57	11.97	14.76	8.36	6.51	10.49	9.64	8.13	10.36	8.3	9.94	11.54	8.37	14.41	12.3	12.24	13.93	15.75	15.76	16.69	15.94	23.83	21.16	21.86	34.39	20.81	32.24	12.18	9.91	17.67	19.88	15.6	18.35	21.9	21.99	8.56
XLOC_001423	0.17	0.27	0.6	0.27	0.16	0.37	0.22	0.12	0.37	0.68	0.77	0.42	0.84	0.4	0.82	0.56	0.23	0.54	0.66	0.24	0.31	0.45	0.31	0.31	0.52	0.49	0.58	0.32	0.23	0.42	0.3	0.35	0.49	0.55	1	0.49	0.57	0.43	0.47	0.66	0.53	0.37	0.94	0.48	0.33	0.39	0.23	0.54	0.42
XLOC_001424	79.96	102.73	134.56	106.42	76.42	89.34	87.24	96.88	73.74	75.01	82.63	75.03	65.64	69.55	67.03	66.8	76.34	85.99	76.03	66.16	70.8	71.96	64.81	60.81	112.21	104.72	79.74	68.88	81.75	80.34	86.04	86.88	82.5	107.13	123.08	86.49	104.81	122.82	93.61	84.67	63.07	59.12	60.16	49.63	58.68	57.63	63.2	55.5	80.35
XLOC_001425	2.42	1.52	2.2	1.72	0.76	2.64	1.74	2.42	1.07	1.53	0.99	1.45	1.59	2.02	4.78	2.05	2.46	2.23	0.75	1.33	1.43	1.49	1.2	1.8	2.66	2.64	2.07	2.1	0.59	2.68	1.28	1.68	2.9	3.61	1.81	1.17	1.27	3.49	2.81	1.15	2.8	3.67	1.69	1.58	1.64	2.96	1.67	1.93	2.06
XLOC_001426	0.34	0.14	0.26	0.34	0.09	0.17	0.1	0.25	0.44	0.24	0.31	0.28	0.49	0.41	0.19	0.48	0.29	0.2	0.22	0.32	0.09	0.11	0.28	0.25	0.37	0.25	0.14	0.28	0.08	0.11	0.37	0.1	0.34	0.06	0.24	0.29	0.29	0.42	0.24	0.43	0.22	0.23	0.2	0.11	0.13	0.13	0.07	0.27	0.34
XLOC_001427	0.39	0.6	0.97	0.48	0.24	0.77	0.91	0.38	0.15	0.21	0.48	0.43	0.38	0.4	0.43	0.27	0.19	0.28	0.18	0.41	0.45	0.35	0.56	0.52	0.54	0.27	0.2	0.31	0.4	0.21	0.67	0.33	0.28	0.13	0.8	0.21	0.31	0.15	0.21	0.6	0.49	0.35	0.26	0.45	0.57	0.41	0.7	0.51	0.48
XLOC_001428	1.84	1.82	1.74	2	1.76	1.55	1.89	2.47	0.68	0.33	0.57	0.7	0.74	0.8	1.02	0.73	0.61	0.56	0.69	0.46	0.62	0.77	0.67	0.41	0.44	0.84	0.74	0.38	0.59	0.69	0.76	0.68	0.61	0.27	0.15	0.46	0.68	0.71	0.18	0.36	0.75	0.69	0.68	0.88	0.47	0.89	0.79	1.25	0.18
XLOC_001429	1	0.64	0.49	0.46	0.52	0.41	0.32	0.4	1.35	1.71	1.28	1.05	0.91	1.06	1.2	0.92	0.49	0.72	0.59	1.05	0.55	1	0.5	0.7	1.04	0.74	1.02	1	1.52	0.95	0.33	0.7	1.34	1.76	1.98	1.83	2.34	2.51	1.22	2.35	0.74	1.03	0.61	0.91	1.24	0.43	0.99	1.07	0.86
XLOC_001430	1.84	2.12	1.12	1.89	0.92	1.61	2.44	1.39	0.57	0.73	0.98	0.54	0.53	0.63	1	0.69	0.53	0.47	0.78	0.45	0.41	0.86	1.05	0.66	0.39	0.66	0.36	0.69	1.31	0.79	1.54	0.7	0.75	0.65	0.76	1.1	0.8	1.29	1.34	0.82	0.55	0.54	0.6	0.61	0.7	1.17	1.52	0.47	0.61
XLOC_001431	7.24	8.02	6.94	9.94	7.86	8.87	8.58	7.86	4.51	5.38	4.59	4.93	5.12	6.59	5.65	5.48	4.65	5.49	5.24	4.98	5.28	6.02	6.14	6.27	4.39	4.3	6.32	4.88	3.79	5.82	3.85	5.71	5.22	5.84	5.19	4.76	3.43	6.09	5.97	5.58	5.02	6.12	6.4	6.82	5.95	4.84	4.84	6.23	4.66
XLOC_001432	0.34	0.49	0.24	0.4	0.66	0.63	0.36	0.74	0.69	0.18	0.38	0.44	0.27	0.38	0.22	0.32	0.48	0.16	0.51	0.27	0.81	0.2	0.49	0.43	0.25	0.31	0.22	0.32	0.17	0.47	0.27	0.17	0.41	0.54	0.68	1.32	0.77	0.7	0.32	0.13	0.19	0.28	0.06	0.99	0.86	0.74	1.07	0.46	0.32
XLOC_001433	0.14	0.09	0.1	0	0.07	0.06	0	0.3	0.52	0.36	0.04	0.29	0.3	0	0.11	0.08	0.11	0.1	0.07	0.13	0.12	0	0	0	0.19	0	0.46	0.11	0.13	0.12	0.07	0	0.1	0.1	0.71	0.13	0.06	0.35	0.32	0	0	0	0	0.1	0.16	0.04	0	0	0
XLOC_001434	0	0	0	0	0	0	0	0	0	0.04	0	0	0	0	0	0	0	0	0	0	0	0	0	0	0	0	0	0	0	0	0	0	0.06	0	0.11	0.45	0.07	0.12	0.04	0.13	0	0	0	0	0	0	0	0	0
XLOC_001435	3.08	5.12	4.52	5.55	3.91	5.06	3.74	4.31	1.82	1.66	1.38	1.61	2.45	2.8	1.8	1.71	1.43	1.62	2.03	1.51	1.87	3.05	1.76	2.2	1.21	0.69	1.14	1.04	1.19	1.37	0.83	1.32	2.14	1.95	2.77	2.11	1.39	2.6	2.81	1.55	1.27	1.08	1.39	1.51	1.26	1.39	1.28	2.05	1.62
XLOC_001436	3.88	2.58	5.08	4.74	3.87	5.54	4.09	5.25	3.34	2.07	4.34	3.15	1.83	3.83	2.4	2.77	3.85	1.51	4.47	3.63	2.52	3.57	2.87	3.26	2.27	1.55	4.23	3.53	1.47	2.86	2.76	2.6	3.35	1.91	2.97	2.34	2.87	3.1	3.75	4.41	4.04	1.89	5.11	4.86	2.3	4.47	3.97	4.87	3.31
XLOC_001437	0.07	0.19	0.17	0.22	0.14	0.24	0.1	0.31	0	0.04	0.05	0	0.06	0.22	0.04	0.02	0.21	0.25	0.14	0.24	0.03	0.42	0.22	0.27	0.21	0	0.12	0.07	0	0.12	0.04	0.04	0	0.05	0.03	0.14	0	0.07	0	0.08	0	0.25	0.27	0.05	0	0.04	0	0.05	0.35
XLOC_001438	0.52	1.51	1.13	0.82	1.32	0.84	1.03	1.25	0.31	0.9	0.77	0.91	0.68	0.38	0.49	0.6	0.86	0.32	0.23	0.51	1.21	1.09	1.13	0.96	0.21	0.78	0.33	1.01	0.37	0.76	0.16	0.46	0.7	0.28	0.56	0.87	0.64	0.39	1.21	0.42	0.62	0.65	0.88	0.23	0.88	0.4	0.46	0.51	0.67
XLOC_001439	0.29	0.29	0	0.15	0.1	0	0	0.14	0.11	0.07	0.02	0.1	0.28	0.15	0.09	0.11	0	0.05	0.2	0.06	0.03	0.04	0	0.06	0.02	0	0.04	0.05	0	0.02	0.05	0.06	0.02	0.1	0.06	0.03	0.06	0.03	0.08	0	0.2	0	0.05	0.18	0	0	0.04	0	0.07
XLOC_001440	0.55	0.28	0.21	0.13	0.12	0.33	0.19	0.04	2.26	2.58	2.38	3.33	3.83	5.62	2.48	2.96	1.39	2.04	1.36	1.63	1.33	3.67	2	1.58	1.32	2.35	1.79	2.6	1.47	2.55	2.75	1.83	1.15	0.96	2.32	2.63	2.63	1.78	2.04	1.47	1.69	1.52	1.65	2.94	1.96	2.58	1.74	2.73	1.23
XLOC_001441	2.98	3.18	1.82	3.77	1.61	0.9	1.78	2.18	0.66	0.94	1.24	0.91	1.65	1.68	1.2	1.9	0.46	0.9	0.45	0.73	0.27	0.45	1.36	0.96	0.46	1.1	0.38	0.19	0.23	0.27	0.44	0.5	1.51	0.83	1.6	2.04	1.03	2.62	2.59	1.68	0.49	0.78	0.58	0.83	0.62	0.09	0.46	0.25	0.92
XLOC_001442	0.69	0.62	0.53	0.82	0.26	0.3	0.21	0.75	0.81	1.09	1.16	1.02	1.58	0.89	1.36	0.89	0.86	0.69	1.01	1.23	1.04	0.61	0.98	0.49	0.93	0.76	0.88	0.9	0.86	0.57	0.54	0.35	0.33	0.31	1.29	1.05	1.09	1.59	0.98	1.56	1.23	0.55	0.82	0.79	1.34	0.99	1.07	0.73	0.61
XLOC_001443	0.56	1	0.71	0.44	0.35	0.49	0.45	1.12	0.33	0.37	0.4	0.71	0.68	0.87	0.23	0.77	0.16	0.25	0	0.48	0.25	0.51	0.22	0.42	0.08	0.5	0.16	0.04	0.13	0.46	0.08	0.3	0.15	0.21	0.92	0.55	0.54	0.22	0	0.56	0.39	1.23	0.91	0.53	0.29	0.25	0.33	1.05	0.32
XLOC_001444	0.61	0.32	0.07	0.44	0.73	0.08	0.51	0.29	0.11	0.39	0.39	0.49	0.48	0.34	0.41	0.62	1.04	0.5	0.66	0.32	0.42	0.23	0.67	0.48	1.1	0.36	0.45	0.85	0.41	0.58	1.1	0.43	0.88	1.21	0.52	0.09	0.36	0.58	0.92	0.63	0.69	0.69	1.52	0.52	0.55	0.06	0.95	0.76	0.84
XLOC_001445	0	0.04	0.19	0.31	0.32	0.17	0	0.75	0	0.1	0.07	0.03	0.04	0.11	0	0	0	0	0.07	0	0	0.08	0	0	0	0	0	0	0.08	0.16	0	0.08	0	0	0.55	0	0.11	0.74	0.38	0.37	0.18	0	0.11	0.2	0.04	0	0.75	0	0
XLOC_001446	2.97	3.99	2.86	3.02	2.11	1.93	2.49	2.72	1.27	1.62	1.48	1.23	1.24	1.45	1.71	1.66	0.61	1.12	0.75	0.74	0.71	0.55	0.69	0.71	0.7	1.33	0.91	0.82	0.91	0.76	0.64	1.18	0.83	1.3	1.57	1.16	1.39	1.13	1.43	1.06	0.58	1.52	0.93	0.8	0.77	0.72	0.81	0.81	0.8
XLOC_001447	5.2	5.79	3.47	5.14	4.64	5.57	5.5	5.85	3.91	3.06	4.09	3.97	2.95	3.62	2.21	2.92	4.49	3.41	3.98	4.09	4.89	3.96	4.01	3.86	3.97	3.25	2.68	3.63	3.34	2.41	4.59	2.25	3.34	4.55	3.39	4.06	4.24	4.51	5.29	3.79	5.29	3.85	3.29	4.21	3.61	4.83	5.42	4.16	4.03
XLOC_001448	3.17	1.92	1.34	2.32	2.53	2.61	3.05	1.23	4.97	6.13	7.25	6.97	6.56	7.85	4.33	5.54	7.68	7.21	8.03	8.56	6.41	7.78	5.7	7.1	5.96	4.71	5.84	6.34	4.17	4.97	5.63	4.12	4.31	3.99	4.02	4.93	6.27	5.55	6.11	4.48	10.19	8.24	7.05	6.62	4.79	5.28	4.71	7.61	7.55
XLOC_001449	1.11	1.22	1.15	1.47	0.96	0.88	1.02	0.55	0.38	0.43	0.56	0.33	0.74	0.72	0.16	0.34	0.61	0.58	0.83	0.51	0.15	0.48	0.18	0.45	0.49	0.34	0.51	0.56	0.71	0.25	0.79	0.2	0.4	0.41	1.59	0.42	0.73	0.78	0.61	0.41	0.72	0.48	1.23	1.52	1.1	0.18	0.71	1.02	0.44
XLOC_001450	9.94	10.86	9.4	9.83	12.5	12.5	12.11	10.96	9.9	10.13	9.42	7.7	9.16	8.51	7.66	9.49	9.13	8.41	10.75	9.32	12.34	10.45	10.96	9.5	11.19	9.48	8.94	10.12	12.88	11.39	13.28	15.27	8.84	10.06	14.04	9.87	13.05	10.88	9.69	10.46	12.69	12.46	11.26	11.08	13.06	13.86	11.56	11.53	9.97
XLOC_001451	1.21	1.89	1.3	1.85	2.11	1.73	1.97	1.67	2.1	2.38	1.63	2.05	1.83	1.47	2.04	2.14	2.85	2.18	2.21	3.01	2.7	2.52	3.09	3.32	1.75	1.9	1.5	2.88	2	1.53	1.52	1.13	2.26	1.7	1.37	0.81	2.11	0.74	1.66	1.83	0.96	1.34	1.33	0.82	0.98	0.66	1.54	1.46	2.81
XLOC_001452	3.48	4.71	2.84	3.17	4.78	1.17	0.64	2.56	2.43	2.35	2.19	1.69	2.89	2.33	2.12	2.32	2.38	1.99	1.31	1.34	2.7	1.09	0.96	1.76	1.93	2.66	1.44	1.04	1.91	1.09	0.54	1.63	2.38	4.09	4.75	4.2	4.81	1.93	2.03	2.1	1.94	3.07	1.96	2	2.74	1.45	1.4	1.53	2
XLOC_001453	0.09	0.28	0.33	0.42	0.12	0.52	0.33	0.3	2.36	3.46	0.94	5.02	1.33	5.74	2.65	3.33	0.22	0.73	0.16	0.6	0.26	0.84	0.8	1.05	0.2	0.37	0.35	0.78	0.25	0.7	0.31	0.39	0.28	0.75	0.43	3.1	0.37	1.78	1.52	1.46	0.08	0.12	0.15	0.4	0.05	0.61	0.49	0.31	0.14
XLOC_001454	14.82	20.51	15.7	19.88	17.52	23.78	22.45	21.19	8.32	8.6	10.68	8.22	10.97	10.35	9.19	8.38	9.78	11.23	14.55	11.16	13.59	12.87	12.36	14.13	8.41	7.54	8.7	11.61	9.54	12.41	13.81	12.01	10.37	7.88	7.72	9.26	5.64	8.74	8.5	7.51	16.52	17.21	13.96	13.67	12.49	15.41	16.79	13.77	10.3
XLOC_001455	0.07	0.22	0.75	0.29	0.18	0.22	0.09	0.21	0.14	0.24	0.28	0.1	0.51	0.35	0.46	0.4	0.23	0.33	0.09	0.09	0.17	0.23	0.06	0.1	0.22	0.24	0.38	0.18	0.1	0.31	0.17	0.07	0.22	0.29	0.24	0.23	0.26	0.31	0.27	0.05	0.19	0.43	0.26	0.14	0.36	0.56	0.28	0.22	0.21
XLOC_001456	2.58	2.21	3.13	2.63	2.91	3.38	3.57	2.86	1.09	1	0.53	1.05	1.23	1.26	1.22	1.25	1.08	0.86	0.99	1.04	1.33	1.5	1.02	1.26	0.98	1.15	1.33	0.97	2.22	1.64	1.86	1.03	0.56	1.02	1.39	1.12	0.96	1.13	1.08	0.87	1.46	1.4	1.36	1.43	1.39	1.96	1.14	2.45	0.79
XLOC_001457	0.13	0.29	0.07	0.04	0.12	0.2	0.32	0.07	0.01	0.13	0.2	0.03	0.12	0.09	0.11	0.09	0.08	0.27	0.33	0.1	0	0.12	0.08	0.17	0.11	0.18	0.3	0.16	0.06	0.08	0.12	0.17	0.33	0.19	0.17	0.25	0.11	0.03	0.26	0.06	0.14	0.06	0.13	0.06	0	0.03	0.17	0.05	0.06
XLOC_001458	4.04	4.17	3.52	3.47	3.63	3.72	3.69	3.96	1.48	1.97	3.01	2	2.22	2.98	3.44	2.39	1.68	2.35	1.88	2.41	2.05	2.44	2.29	2.51	1.78	1.18	1.93	1.18	1.63	2.4	1.42	2.28	2.27	1.75	2.48	1.74	2.43	3.04	1.82	1.28	1.91	2.66	2.23	2.96	2.48	2.56	2.55	2.41	2.1
XLOC_001459	8.95	9	10.28	9.98	11.38	7.55	9.55	11.38	5.38	6.35	7.15	6.15	5.06	6.29	4.76	5.03	5.84	5.33	6.4	5.89	6.48	5.7	6.16	6.5	3.76	3.65	5.33	5.91	5.59	6.19	5.21	6.92	5.23	5.55	7.06	7.36	5.66	4.87	5.89	4.86	5.48	7.14	10.18	8.62	8.34	9.6	7.56	8.84	5.88
XLOC_001460	19.45	18.71	15.59	18.05	16.07	15.86	14.94	18.17	31.33	27.05	37.15	27.59	27.77	23.38	21.16	24.12	70.03	61.05	65.19	61.36	58.62	62.71	59.13	54.17	44.17	35.43	34.26	46.99	33.27	32.49	39.19	32.02	35.61	34.65	42.68	32.03	32.7	40.02	35.5	40.05	53.16	50.87	42.88	51.36	38.87	45.95	49.71	40.8	54.51
XLOC_001461	2.82	3.24	3.26	2.1	2.13	2.5	2.38	2.59	0.83	0.97	1.16	0.77	0.68	1.09	1.57	0.91	0.56	0.88	0.87	0.58	0.54	0.68	0.72	0.6	0.72	0.84	1.01	0.65	0.51	0.65	1.14	0.7	0.87	1.58	2.27	1.36	0.85	1.86	1.58	1.49	0.59	0.77	0.93	0.59	0.91	0.86	1.09	0.97	0.47
XLOC_001462	4.14	5.86	3.19	5.09	5.43	3.5	3.64	5.66	0.89	0.82	1.38	1.29	0.68	0.89	0.94	1.41	0.87	0.81	1.06	1.65	1.34	2.06	1.52	1.27	1.85	1.17	0.88	0.77	0.6	1.35	1.54	1.44	1.26	1.39	1.3	1.87	0.67	1.89	2.02	2.16	1.56	2.1	2.63	2.22	2.63	1.39	3.25	2.66	0.74
XLOC_001463	0.6	1.01	1.04	0.55	1.27	0.9	0.96	0.53	0.7	0.63	0.75	0.37	0.56	0.56	0.74	0.49	0.58	0.53	0.4	1.07	0.63	0.54	1.03	0.85	0.81	0.46	0.64	0.8	0.96	0.53	1.25	0.4	0.29	0.44	0.19	0.29	0.39	0.36	0.35	0.39	0.88	0.6	1.06	1.1	0.97	0.87	0.64	0.51	0.95
XLOC_001464	0.26	0.02	0.34	0.35	0.17	0.25	0.16	0.16	0.12	0.26	0.2	0.47	0.19	0.27	0.16	0.31	0.2	0.21	0.3	0.34	0.27	0.11	0.23	0.13	0.21	0.02	0.28	0.12	0.22	0.12	0.03	0.02	0.13	0.15	0.27	0.23	0.18	0.79	0.24	0.43	0.11	0.03	0.08	0.43	0.19	0.3	0.16	0.2	0.2
XLOC_001465	1.22	1.57	1.72	1.25	2.07	2.66	1.49	1.87	0.64	1.26	1.58	1.2	1.34	1.49	0.81	1.36	1.03	0.87	1.23	1.15	1.87	2.32	1.39	1.11	0.59	1	0.8	0.95	1.49	1.33	0.68	1.34	0.76	1.23	1.94	2.58	1.01	1.34	2.02	2.43	1.03	0.87	1.46	1.09	1.52	0.76	1.52	2.17	0.82
XLOC_001466	0	0	0	0	0	0	0	0	0	0	0	0	0	0	0	0	0	0	0	0	0	0	0	0	0	0	0	0	0	0	0	0	0	0	0	0	0	0	0	0	0	0	0	0	0	0	0	0	0
XLOC_001467	0.08	0.06	0.24	0.04	0.06	0.3	0.48	0.63	1.5	2.05	4.34	1.53	3.54	2.77	3.21	4.28	0.19	0.41	0.49	0.15	0.35	0.62	0.57	0.55	0.29	0.17	0.42	0.06	0.39	0.67	0.74	0.55	0.59	0.59	2.24	0.49	1.95	0.93	2.98	2.97	0.09	0.22	0.24	0.05	0.04	0.24	0.18	0.43	0.24
XLOC_001468	0	0.06	0.02	0.02	0.16	0	0.04	0.04	0.39	0.04	0.13	0.19	0.45	0.33	0.43	0.3	0.15	0.04	0.17	0.06	0.23	0.18	0.1	0.13	0.27	0.06	0.09	0.18	0.16	0.15	0	0.09	0.08	0.15	0.22	0.04	0.05	0.06	0.24	0.19	0.1	0.03	0.12	0.01	0.11	0	0.14	0.01	0.14
XLOC_001469	0.03	0.12	0.14	0.06	0.02	0	0.12	0.29	0.31	0.27	0.2	0.28	0.35	0.52	0.33	0.53	0.2	0.36	0.1	0.09	0.43	0.23	0.39	0.65	0.16	0.3	0.18	0.17	0.34	0.33	0.22	0.48	0.03	0.26	0.1	0.23	0.07	0.59	0.24	0.07	0.13	0.34	0.64	0.27	0.12	0.33	0.3	0.4	0.13
XLOC_001470	19.55	22.39	27.68	23.64	26.42	18.46	27.96	18.25	22.49	29.05	39.72	29.36	30.99	26.77	34.12	25.51	25.52	19.77	26.43	25.8	20.56	13.69	31.94	19.97	35.45	25.1	24.62	21.73	24.66	24.54	29.32	25.07	27.29	31.72	26.39	27.91	36.24	23.16	29.84	31.26	34.69	39.63	47.14	34.69	43.06	32.38	50.86	34.22	31.76
XLOC_001471	3.59	4.09	4.3	3.76	3.23	5.38	4.9	5.55	5.21	4.01	3.99	5.07	4.65	5.53	5.66	7.32	4.02	4.77	4.85	6.95	3.52	4.96	5.41	6.34	3.94	3.03	4.01	4.59	4.1	4.85	3.81	4.84	3.75	3.5	3.99	3.66	3.93	2.62	4.73	4.18	3.56	2.86	3.85	3.93	5.15	4.41	4.64	5.63	4.35
XLOC_001472	3.64	5.08	4.02	4.83	4.7	5.96	4.32	4.57	1.38	1.14	1.08	1.11	2.03	1.86	1.35	1.19	0.74	0.97	1.04	1.22	0.68	0.98	1.03	1.02	0.57	1.04	1.34	0.9	0.65	1.19	0.61	0.96	2.52	1.98	1.19	0.95	0.62	1.02	1.43	0.47	1.63	1.45	1.69	1.33	1.76	1.84	1.47	1.57	1.14
XLOC_001473	0.83	0.86	0.6	0.5	0.88	0.61	1.11	0.79	0.04	0.13	0.03	0.24	0.28	0.11	0.21	0.41	0.2	0.64	0.26	0.43	1.27	0.39	0.51	0.82	0.5	0.24	0.72	0.33	1.55	0.57	0.44	0.47	0	0	0	0.06	0.38	0.4	0.52	0.65	0.18	0.21	0.14	0.13	0.3	0.04	0.22	0.09	0.29
XLOC_001474	3.24	2.07	2.85	3.43	3.02	4.07	4.36	3.73	2.18	0.83	1.15	1.32	2	2.56	2.06	1.43	1.59	1.12	0.83	1.08	1.53	0.8	2.03	1.48	1.39	0.89	1.16	0.83	1.18	0.99	1.36	1.43	1.94	1.35	0.72	0.71	0.82	1.27	1.85	0.87	1.89	0.72	1.44	1.32	1.45	1.02	1.94	1.66	2.04
XLOC_001475	0.36	0.5	0.15	0.3	0.04	0.08	0.19	0.18	0.21	0.2	0.07	0.33	0.4	0.51	0.24	0.2	0.09	0.3	0.05	0.2	0.16	0.08	0.07	0.02	0.29	0.1	0.13	0.21	0.03	0.01	0	0.06	0.16	0.27	0.11	0.11	0.02	0.21	0.29	0.05	0.14	0.25	0.01	0.05	0.13	0.05	0.03	0.08	0.15
XLOC_001476	1.05	0.78	0.9	1.11	0.46	0.95	0.44	0.61	0.43	0.56	0.57	0.65	0.89	1.34	0.72	0.53	0.26	0.89	0.44	0.51	0.51	0.85	0.52	0.42	0.8	0.56	0.49	0.37	0.44	0.37	0.18	0.4	0.6	0.92	0.46	1.05	0.33	0.33	0.56	0.25	0.63	0.81	0.69	0.77	0.91	1.54	0.35	0.66	0.45
XLOC_001477	0.23	0.43	0.5	0.64	0.11	0.35	0.53	1.12	0.64	0.33	0.39	0.3	0.69	0.55	0.19	0.53	0.62	0.82	0.18	0.28	0.26	0.49	0.32	0.49	0.71	0.7	0.65	0.3	0.32	0.24	0.12	0.96	0.38	0.6	1.08	0.11	0.25	0.6	0.33	0.91	0.89	1.61	0.84	0.73	1.95	0.66	0.43	1.68	0.46
XLOC_001478	0.61	0.65	0.62	0.48	0.65	0.62	0.56	0.54	0.29	0.19	0.3	0.23	0.25	0.25	0.26	0.19	0.09	0.16	0	0.16	0.15	0.34	0.2	0.07	0	0.35	0.25	0.03	0.41	0.12	0.09	0.34	0.12	0.2	0.08	0.11	0.14	0.23	0.19	0.12	0.06	0.21	0.14	0.14	0.28	0.2	0.51	0.41	0.31
XLOC_001479	3.62	4.39	3.31	3.43	3.16	4.02	3.82	5.18	1.6	0.92	1.65	1.8	1.01	1.11	0.96	1.42	1.21	1.5	1.54	1.92	1.7	1.2	1.56	1.38	0.93	0.64	1.73	0.86	0.84	1.68	1.01	1.73	1.2	1.36	1.17	1.18	0.81	1.57	0.88	0.76	3.08	2.69	4.18	3.36	1.85	3.34	2.46	3.64	1.87
XLOC_001480	0.35	0.11	0.05	0.2	0.03	0.55	0.15	0.14	0.11	0.1	0.31	0.13	0.34	0.25	0.51	0.48	0.39	0.57	0.29	0.43	0.49	0.19	0.63	0.49	0.2	0.54	0.37	0.31	0.08	0.04	0.1	0.27	0.39	0.05	0.15	0.31	0.38	0.23	0.15	0.07	0.47	0.45	0.32	0.3	0.41	0.29	0.13	0.28	0.36
XLOC_001481	5.41	3.77	5.39	4.34	7.12	5.38	5.24	4.47	4.97	4.85	4.93	4.17	3.12	2.74	3.29	3.84	4.96	3.63	5.68	3.61	5.31	6.78	5.99	4.18	6.68	4.35	5.21	4.99	4.9	4.86	5.31	4.29	4.12	3.29	3.58	3.18	4.24	3.58	2.97	3.49	5.56	5.95	5.13	5.97	4.75	4.31	3.81	5.55	4.64
XLOC_001482	2.26	1.88	1.74	2.2	1.44	1.22	1.01	1.3	0.22	0.47	0.87	0.58	0.57	0.65	0.58	0.46	0.24	0.6	0.27	0.77	0.19	0.26	0	0.36	0.5	0.37	0.74	0.41	0.23	0.16	0.2	0.23	0.34	0.23	0.29	0.31	0.68	1.03	0.79	0.65	0.84	0.98	0.62	0.9	0.47	1.17	0.53	0.78	0.41
XLOC_001483	4.34	4.23	4.19	4.2	6.09	6	4.37	5.2	2.93	2.33	2.59	2.64	2.97	2.87	2.48	3.51	3.17	3.33	3.11	3.59	2.03	4.37	3.41	4.23	3.01	3.48	3.46	3.85	2.09	2.17	4.18	3.32	4.49	3.94	3.62	5.43	4.17	4.73	4.49	4.21	5.29	4.21	5.02	7.65	4.81	4.97	4.37	5.72	3.74
XLOC_001484	0.38	0.26	0.05	0.2	0.19	0.22	0.12	0.11	0.11	0.17	0.2	0.13	0.65	0.36	0.28	0.3	0.25	0.09	0.06	0.43	0.17	0.08	0.41	0.33	0.43	0.24	0.21	0.33	0.6	0.15	0.34	0.08	0.32	0.47	0.36	0.19	0	0.2	0.22	0.29	0.28	0.14	0.18	0.29	0.83	0.04	0.91	0.22	0.86
XLOC_001485	1.53	1.32	1.92	1.43	1.57	0.89	2.71	2.04	2.48	2.57	1.18	2.87	2.51	2.95	6.79	2.65	1.18	1.87	1.29	1.21	1.16	1.9	2.45	1.7	1.33	1.21	1.57	2.45	0.91	2.92	1.9	1.35	1.57	0.84	1.03	1.67	1.07	1.28	2.34	0.88	1.6	1.98	1.71	1.95	1.3	2.09	2.34	1.49	1.4
XLOC_001486	0.37	0.45	0.11	0.64	0.44	0.51	0.27	0.07	0.52	0.23	0.5	0.04	0.16	0.25	0.12	0.09	0.17	0.53	0.6	0.43	0	0.18	0.06	0.06	0.66	0.57	0.33	0.08	0.37	0.04	0.36	0.82	0.16	0.49	0.21	0.14	0.44	0.38	0.09	0.08	0.12	0.4	0.79	0.37	0.39	0.36	0.65	0.2	0.58
XLOC_001487	0.17	0.05	0.21	0.33	0.08	0.08	0.23	0.03	0.35	0.28	0.19	0.28	0.35	0.21	0.32	0.32	0.46	0.4	0.27	0.5	0.4	0.44	0.49	0.16	0.13	0.14	0.29	0.32	0.36	0.34	0.33	0.24	0.43	0.68	0.16	0.52	0.33	0.38	0.31	0.17	0.48	0.52	0.31	0.68	0.35	0.4	0.51	0.25	0.41
XLOC_001488	0.13	0	0.29	0.11	0	0	0	0.24	0	0.07	0.21	0.42	0.07	0.08	0.07	0	0.1	0	0	0	0	0	0	0.11	0.52	0	0.22	0.31	0	0.04	0	0	0	0.44	0.12	0.07	0	0	0	0	0.07	0.11	0.15	0.2	0.28	0	0.05	0.14	0
XLOC_001489	0.94	0.73	1.16	1.35	0.44	1.08	0.95	1.43	3.24	3.49	1.82	2.87	1.33	0.61	2.18	2.54	0.66	0.58	0.59	0.7	0.61	0.22	0.57	0.81	0.25	0.69	0.55	0.98	0.84	0.91	0.34	0.83	0.13	0.63	1.89	2.46	3.63	1.9	1.92	2.28	0	0.2	0.7	0.63	0.29	0.57	0.15	0.06	0.4
XLOC_001490	0.6	0.35	0.42	0.59	0.34	0.57	0.46	0.28	0.45	0.4	0.46	0.28	0.33	0.19	0.11	0.26	5.33	5.52	6.32	6.02	4.58	5.15	3.62	5.41	3.48	5.28	4.17	4.23	2.09	2.26	2.46	2.66	2.46	1.92	0.86	0.47	0.21	0.44	0.33	0.07	6.93	8.31	5.3	4.83	4.33	5.54	4.47	6.4	5.78
XLOC_001491	0.83	0.8	0.41	0.6	0.16	0.8	0.76	0.61	0.37	0.27	0.25	0.46	0.12	0.17	0.38	0.21	0.23	0.41	0.02	0.29	0.19	0.25	0.2	0.36	0.57	0.34	0.22	0.1	0.13	0.14	0.01	0.25	0.08	0.55	0.15	0.83	0.26	0.81	0.21	0.36	0.52	0.67	0.3	0.35	0.25	0.26	0.49	0.3	0.1
XLOC_001492	0.84	0.66	0.28	0.86	0.84	0.98	0.74	0.58	0.4	0.33	0.26	0.7	0.91	0.83	0.42	0.34	0.16	0.08	0.09	0.33	0.08	0.24	0.17	0.11	0.06	0.21	0.14	0.16	0.13	0.24	0.32	0.1	0.06	0.13	0.09	0.25	0.15	0.22	0.24	0.22	0.18	0.09	0.07	0.21	0.1	0.1	0.09	0.05	0.14
XLOC_001493	0	0.02	0	0	0.1	0.06	0	0	0.12	0.07	0.1	0.07	0.09	0.06	0.18	0	0	0.09	0.07	0	0.06	0.04	0	0.17	0.11	0	0.07	0.14	0.02	0	0	0	0.02	0.02	0	0	0	0	0	0	0	0.18	0	0.02	0.08	0	0.02	0	0
XLOC_001494	0.41	0.22	0.03	0.18	0.41	0.36	0.34	0.37	0.65	0.7	0.79	0.75	0.59	1.01	0.71	1.06	0.42	0.56	0.28	1.03	0.42	0.67	0.8	1.69	0.23	0.33	0.23	0.57	0.09	0.6	0.84	0.96	1.19	1.22	0.64	1.7	0.95	1.09	2.18	1.4	0.53	0.68	0.54	1.2	0.71	0.3	1.15	1.06	0.31
XLOC_001495	10.55	11.77	6.04	8.87	8.85	10.59	9.76	8.26	1.37	1.19	1.62	1.72	3.28	2.06	2.43	2.69	4.56	5.44	3.79	4.72	4.18	5.58	4.39	5.19	3.9	2.9	2.97	3.76	3.91	4.86	2.75	3.47	3.4	4.41	2.2	1.64	0.91	2.45	2.36	1.53	7.28	8.84	5.57	7.38	6.89	6.64	6.45	7.19	3.82
XLOC_001496	6.71	5.77	4.58	6.57	4.43	3.29	4.82	4.48	4.69	4.28	2.82	3.27	4.7	4.36	5.07	3.28	3.29	5.06	2.16	3.71	2.44	1.91	1.89	3.59	3.21	2.78	3.14	2.85	1.72	2.5	0.75	2.27	4.63	3.99	2.26	1.78	1.5	2.6	2.63	2.37	3.22	3.89	2.11	3.28	2.51	2.44	1.45	3.6	4.26
XLOC_001497	1.57	2.3	2.31	2.29	1.99	1.65	1.15	1.65	0.99	0.83	1.56	1.65	2.17	1.83	1.36	1.85	0.76	1.48	1.14	1.04	1.31	0.88	0.88	1.19	0.92	1.46	1.67	1.16	0.9	1.14	0.67	0.72	1.35	1.84	1.48	1.42	1.1	1.18	0.87	1.34	1.14	1.81	1.39	1.55	1.32	1.3	1.26	1.38	0.87
XLOC_001498	0.43	0.56	0.48	0.96	0.87	0.47	1.01	0.7	0.16	0.14	0.21	0.23	0.07	0.09	0.34	0.19	0.19	0.11	0.22	0.21	0.19	0.3	0.27	0.55	0.1	0.23	0.26	0.33	0.3	0.16	0.85	0.47	0.13	0.16	0.31	0	0.08	0.44	0.42	0.1	0.12	0.25	0.24	0.18	0.76	0.61	0.25	0.5	0.59
XLOC_001499	2.2	1.31	2.42	1.66	2.51	3.55	2.29	3.35	1.56	1.65	1.72	1.64	2.54	2.63	2.74	2.1	1.1	1.39	1.54	1.42	1.73	1.73	1.65	1.8	1	1.85	3.15	1.18	1.51	2.61	0.69	2.09	3.21	3.36	2.12	2.57	1.45	2.38	2.59	1.24	2.96	3.17	1.91	3.1	2.26	4.56	2.79	2.68	2.16
XLOC_001500	0.41	0.42	0.53	0.48	0.52	0.75	0.88	0.67	1.13	0.87	1.02	1.09	1.29	1.38	0.75	1.44	0.55	0.68	0.73	0.69	0.45	1.04	0.93	0.83	0.95	0.74	0.59	0.91	0.36	1.09	0.51	1.08	0.99	0.95	0.65	0.92	0.82	0.94	1.03	0.29	1.31	1.06	1.15	1.26	1.27	2	0.86	1.3	0.74
XLOC_001501	0	0	0	0	0	0	0	0	0.09	0	0.1	0	0.05	0	0	0.03	1.02	0.35	0.35	0.48	0.27	0.36	0.27	0.04	0.8	0.16	0.08	0	0.28	0.03	0	0	0.53	0.22	0.05	0.05	0.08	0.35	0.57	0.11	0.27	0.51	0.05	0.05	0.23	0	0.27	0.03	1
XLOC_001502	0.73	0.44	0.81	0.34	0.81	0.78	0.6	0.69	0.18	0.5	0.18	0.34	0.28	0.37	0.19	0.25	0.27	0.52	0.35	0.04	0.59	0.16	0.55	0.44	0	0.33	0.1	0.2	0.27	0.34	0.37	0.69	0.28	0.1	0.69	0.21	0.15	0.13	0.25	0.73	0.57	0.33	0.6	0.44	0.84	0.7	0.94	1.17	0.24
XLOC_001503	0.47	0.52	0.8	0.61	0.13	0.3	0.63	0.57	0.08	0.38	0.24	0.11	0.19	0.19	0.12	0.47	0	0.28	0.13	0.13	0.12	0.26	0.48	0.04	0.12	0.09	0.51	0.4	0.35	0.2	0.09	0.21	0	0.06	0.2	0.13	0.07	0.66	0	0.24	0	0.16	0.05	0.11	0.25	0.36	0.2	0.2	0.05
XLOC_001504	1.14	0.71	1.01	0.72	0.86	0.79	0.78	0.23	2.5	2.11	3.1	1.69	2.39	2.26	2.16	1.75	5.58	2.95	3.66	3.01	3.51	2.1	2.77	2.48	3.27	3.77	2.56	2.73	1.32	1.89	2.22	2.76	3.3	2.29	2.8	1.85	1.99	3.27	3.13	2.35	4.45	3.82	2.26	2.7	3.53	3.02	3.27	3.36	2.76
XLOC_001505	0.54	0.82	0.61	0.28	0.79	0.62	0.62	0.83	0.45	0.7	0.37	0.26	0.39	0.3	0.1	0.72	0.24	0.32	0.45	0.3	0.61	0.49	0.14	0.54	0.18	0.39	0.28	0.05	1.31	0.19	0.17	0.52	0.52	0.13	0.5	0.09	0.62	0.09	0.05	0.5	0.15	0.44	0.38	0.11	0.72	0.3	0.24	0.33	0.5
XLOC_001506	4.33	4.12	4.36	3.49	2.2	2.92	2.53	3.89	3.65	3.46	4.95	3.83	4.87	4.93	3.32	3.29	11.18	9.58	6.76	6.51	8.12	6.85	5.32	5.85	9.61	7.58	6.08	7.16	4.73	4.03	3.34	4.6	6.55	7	10.77	6.82	7.24	7.52	8.01	2.99	7.84	7.42	4.15	4.38	5.82	4.87	3.88	3.45	12.45
XLOC_001507	1.13	1.07	0.12	0.3	0.07	0	0.13	0.12	2.27	1.95	1.89	2.28	5.15	7.42	2.01	1.9	1.56	3.4	0.59	0.87	1.15	0.67	0.44	0.53	1.63	1.54	0.98	0.75	0.47	0.33	0.17	0.34	2.08	2.72	2.95	4.56	2.33	2.66	3.97	1.39	2.42	1.75	0.35	0.95	0.67	0.83	0.65	0.33	1.55
XLOC_001508	8	7.63	7.89	8.76	8.58	8.56	7.52	7.16	6.88	6.31	7.47	6.99	6.7	5.83	6.19	5.97	6.28	5.26	7.08	6.02	7.94	8.24	7.88	5.64	5.07	5.89	4.47	6.38	5.81	7.14	8.29	5.49	5.59	6.03	6.25	6.4	6.57	7.1	5.53	6.62	6.89	5.78	8.13	6.81	7.33	7.91	8.03	6.78	6.87
XLOC_001509	0	0.05	0.06	0.15	0.27	0.2	0.07	0	0.02	0.31	0.87	0.6	0.55	0.31	0.22	0.45	0.09	0.2	0.2	0.23	0.04	0	0	0.13	0.04	1.07	0.79	0.22	0	0.05	0	0.17	0.06	0.72	0.37	0.04	0	0.53	0	0.31	0	0.38	0.24	0.14	0	0.12	0.03	0	0
XLOC_001510	0.99	0.77	1.25	1.07	1.96	1.5	2.12	1.49	0.78	0.6	1.29	0.47	0.77	1.23	0.95	0.78	0.82	0.54	1.68	1.14	1.39	1.51	1.26	0.67	0.54	0.53	2.23	1.17	1.25	1.07	1.09	0.73	0.73	1.04	1.48	0.99	1.5	1.61	1.38	0.88	0.94	0.58	0.8	0.88	0.69	2.41	0.53	1.09	0.94
XLOC_001511	0.56	1.35	2.07	0.74	0.37	1.43	0.91	0.66	0.66	0.53	0.75	0.37	0.36	0.59	0.25	0.57	0.74	0.57	0.51	0.83	0.36	0.87	0.76	0.52	0.39	0.28	1.03	0.5	0.17	0.41	0.46	0.56	0.4	0.49	1.62	0.91	0.27	0.96	0.65	0.27	0.57	0.42	0.58	0.36	0.44	0.38	0.24	0.29	1.05
XLOC_001512	0.28	0.57	0.57	0.31	0.44	0.39	0.1	0.94	0.2	0.35	0.35	0.09	0.42	0.63	0.47	0.32	0.3	0.32	0.23	0.33	0.15	0.48	0.27	0.29	0.35	0.37	0.25	0.23	0	0.17	0.12	0.38	0.32	0.25	0.37	0.44	0.05	1.16	0.52	0.19	0.28	0.34	0.35	0.59	0.7	0.44	0.65	0.49	0.13
XLOC_001513	2.07	1.61	2.47	2.08	3.67	2.97	3.16	1.7	2.4	1.88	2.39	2.32	2.43	2.88	2.18	1.87	2.88	1.91	3.94	4.33	3.52	4.67	3.66	3.98	2.49	2.3	3.49	3.28	4.03	4.07	8.46	4.31	1.61	1.42	1.37	2.17	2.65	2.25	2.28	2.57	1.87	2.1	4.13	4.54	3.11	3.77	4.05	4.59	2.91
XLOC_001514	9.24	9.06	16.54	9.18	8.09	8.79	8.96	9.08	11.26	10.92	15.05	12.2	16.42	15.78	14.18	14.1	7.59	10.99	9.47	7.63	8.15	7.3	6.68	7.9	10.85	12.23	14.03	9.19	7.45	10.56	6.47	8.99	8.47	10.97	9.98	7.35	7.36	8.55	9.45	6.91	5.99	9.85	9.23	7.85	8.09	7.19	5.83	6.66	7.2
XLOC_001515	0.38	0.87	0.38	0.38	0.33	0.12	0.39	0.51	0.75	0.35	0.2	0.1	0.75	0.35	0.18	0.47	0.15	0.92	0.19	0.28	0.99	0.46	0.19	0.2	0.43	0.68	0.45	0.47	0.3	0.71	0.03	0.12	0.48	0.99	0.53	0	0.12	0.3	0.5	0.21	1.02	0.89	0.16	0.72	0.34	0.34	0.26	0.58	0.54
XLOC_001516	1.48	1.81	1.35	2.19	1.26	1.62	1.5	2.19	0.2	0.83	0.72	0.86	0.61	0.64	0.93	0.49	0.34	1.09	0.95	0.53	0.85	1.02	0.47	0.76	0.47	0.52	0.33	0.36	0.89	0.3	0.48	0.88	0.64	1.14	2.17	2.56	0.43	0.97	2.06	0.67	0.71	0.65	0.72	0.4	0.47	0.83	0.87	0.94	1.17
XLOC_001517	0.57	0.13	0	0.8	0.5	0	0.41	2.25	1.12	0.03	0.33	0.44	0.75	0.32	0.77	2.06	1.08	0.23	0.06	0.49	0.4	0	0.3	0.82	0.5	0.07	0	0.26	0.4	0.08	0.55	1.17	0.41	0.09	0.36	0.56	1.09	0	0.37	4.73	0.38	0	0.18	0.13	0.45	0.08	0.99	1.89	0.86
XLOC_001518	0	0.08	0.04	0	0	0.1	0.22	0.16	0.17	0	0.15	0.06	0.19	0.17	0.16	0.24	0.09	0.51	0.3	0.29	0.22	0.43	0.81	0	0.2	0.2	0.27	0.25	0.41	0.6	0.29	0.04	0.04	0	0.11	0.35	0.2	0	0	0.07	0	0.23	0.07	0.12	0.18	0.47	0.08	0.04	0.27
XLOC_001519	0.8	1.18	0.91	1	1.05	1.36	1.13	1.39	0.72	1.04	0.73	0.4	0.98	0.47	0.69	0.84	0.57	0.55	0.48	0.78	0.58	0.92	0.82	0.84	0.73	0.75	1.09	1.05	0.93	0.66	0.24	0.92	0.58	0.75	0.32	0.58	0.56	0.37	0.55	0.41	0.43	0.59	0.62	0.59	0.26	0.61	0.45	0.61	0.37
XLOC_001520	0.29	0.05	0.05	0.29	0.14	0.44	0.2	0.19	0.17	0.19	0.3	0.39	0.79	0.78	0.24	0.38	0.34	0.26	0.29	0	0.4	0.35	0.52	0.44	0.29	0.4	0	0.08	0.32	0.39	0	0.27	0.11	0	0	0.29	0.44	0.6	0.17	0	0.2	0.36	0.41	0.18	0.17	0.18	0	0	0.16
XLOC_001521	1.4	0.62	1.15	1.17	1.12	1.63	1.26	0.96	0.29	0.14	0.09	0.3	0.29	0.37	0.43	0.13	0.04	0.08	0	0.17	0.18	0.21	0.25	0.29	0.08	0.14	0.19	0.12	0.07	0.07	0.05	0.09	0.06	0.34	0	0.03	0.1	0	0.4	0.19	0.33	0.23	0.19	0.1	0.24	0.28	0.19	0.31	0.13
XLOC_001522	0.44	0.08	0.18	0.1	0.18	0.16	0.23	0.06	0.15	0.36	0.39	0.13	0.24	0.07	0.65	0.29	0.24	0.13	0.19	0.24	0.68	0.15	0.3	0.53	0	0.07	0.45	0.26	0.58	0.19	0.33	0	0.36	0.14	0.23	0.3	0.05	0.19	0.43	0.21	0.1	0.1	0.17	0.22	0.48	0.64	0.21	0.04	0.35
XLOC_001523	0.43	0.44	0.52	0.28	0.47	0.49	0.33	0.4	0.83	0.66	1.04	0.56	0.49	1	0.29	0.69	0.5	0.83	1.09	0.42	0.5	0.73	0.68	1.04	0.91	0.3	0.35	0.17	0.54	0.48	0.69	1.17	1.62	2.56	1.5	1.33	0.76	1.78	0.66	1.02	0.84	0.94	1.4	1.41	0.85	1.25	0.91	1.42	0.73
XLOC_001524	0.41	0.59	0.03	0.39	0.48	0.65	0.41	0.9	0.07	0.24	0	0	0.12	0.15	0.06	0.11	0.09	0.13	0.15	0.07	0.07	0.23	0.24	0.19	0.08	0.08	0.06	0.16	0.33	0.36	0.08	0.16	0.19	0.33	0	0.18	0.36	0.39	0.39	0.17	0.25	0.8	0	0.17	0.45	0.61	0.56	0.31	0
XLOC_001525	6.81	7.21	7.73	5.91	3.85	6.84	5.28	5.43	0.93	0.71	0.84	0.52	0.58	0.34	0.79	0.32	0.4	0.23	1.2	0.42	0.43	0.39	0.98	0.88	0.44	0.72	1.33	0.66	0.57	0.66	0.62	0.9	1.23	0.67	1.7	0.89	0.51	0.78	0.6	0.58	1.22	0.98	1.42	0.78	1.67	1.26	0.86	0.91	0.67
XLOC_001526	0.85	0.99	0.78	1.2	0.93	1.55	0.87	0.71	1.05	2.11	1.01	1.33	1.69	1.84	1.36	1.31	1.28	1.55	1.29	1.2	1.2	1.44	1.32	0.93	1.17	1.35	1.17	1.16	1.21	0.9	1.12	0.64	1.3	1.96	2.26	1.94	1.38	1.76	1.64	1.92	1.23	1.27	0.61	1.24	1.09	1.08	0.74	0.74	0.96
XLOC_001527	0.03	0	0.19	0.09	0.09	0	0.05	0	0.51	0.6	0.48	0.6	0.45	0.15	0.26	0.45	0.3	0.17	0.12	0.06	0.16	0.07	0.09	0.08	0.23	0.39	0.18	0.14	0.17	0.52	0.27	0.18	1.19	0.62	1.84	0.47	1.03	1.08	0.8	1.85	0.18	0	0.02	0.26	0.11	0.41	0.34	0.55	0.13
XLOC_001528	0.02	0.02	0.02	0.06	0	0.01	0	0.08	0.06	0.05	0.16	0.02	0.03	0.03	0.02	0.1	0.49	0.27	0.41	0.38	0.27	0.52	0.31	0.57	0.54	0.41	0.34	0.17	0.14	0.21	0.19	0.43	0.55	0.71	0.15	0.35	0	0.21	0.16	0.04	0.27	0.13	0.33	0.29	0.12	0.14	0.16	0.18	0.16
XLOC_001529	2.59	2.9	2.15	2.73	2.67	2.93	2.89	2.51	3.96	3.24	3.99	3.15	1.92	2.35	2.58	2.09	3.38	1.74	2.25	3.48	2.51	2.33	2.75	2.53	1.68	2.18	2.3	2.52	3.12	2.17	1.9	3.31	3.24	2.81	3.66	3.68	2.57	3.73	2.82	3.76	2.92	2.01	3.3	2.93	2.72	1.8	3.02	1.8	2.96
XLOC_001530	0.99	1.31	1.28	1.33	1.09	1.57	2.05	1.57	1.31	0.91	0.56	0.59	0.27	0.33	0.32	0.38	0.86	0.65	0.54	0.8	0.45	0.4	1.28	0.35	0.32	0.63	0.46	0.66	0.77	0.71	0.71	0.35	0.72	0.49	0.62	0.69	0.11	0.3	0.48	0.65	1.07	0.74	1.22	0.85	0.81	0.45	0.81	0.64	1.07
XLOC_001531	0.38	0.6	0.99	0.93	0.87	1.27	1.16	1.02	0.33	0.42	0.36	0.33	0.61	0.59	0.36	0.42	0.35	0.36	0.65	0.24	0.44	0.36	0.55	0.46	0.38	1.27	0.32	0.5	0.54	0.62	0.16	0.44	1.48	0.52	0.43	0.68	0.25	0.36	0.4	0.15	0.7	1.19	0.63	0.8	0.92	0.66	0.57	0.71	0.45
XLOC_001532	5.81	5.7	8.7	6.47	7.2	5.34	7	7.07	10.69	8.8	12.39	8.63	9.59	7.61	10.4	10.46	10.09	6.89	9.63	10.19	8.44	7.69	8.32	9.41	6.85	7.62	9.65	10.07	9.17	6.65	7.3	8.29	8.75	8.03	12.73	7.77	7.24	8.61	8.88	9.45	8.86	7.61	14.13	9.07	8.46	7.34	8.63	9.52	6.66
XLOC_001533	24.62	24.54	24.64	25.03	29.04	36.64	33.71	26.06	40.42	35.56	34.37	38.28	33.51	31.09	26.64	32.82	31.82	30.77	45.82	38.4	41.25	41.3	43.08	40.71	22.55	24.5	29.5	31.56	32.82	35.79	33.91	33.98	23.78	20.2	18.4	16.8	25.43	22.6	24.21	24.35	25.64	28.33	26.48	23.76	27.37	25.42	22.45	28.51	30.11
XLOC_001534	1.05	0.76	0.55	0.52	0.5	0.78	0.4	1.09	0.49	0.44	0.3	0.33	0.37	0.88	0.94	0.5	0.78	0.57	0.84	0.64	0.43	0.66	1.01	0.65	0.65	0.28	0.9	1.09	0.61	0.52	1.09	0.8	0.73	0.35	0.31	0.46	0.25	1.95	0.8	0.78	0.5	0.62	0.26	1.06	0.37	0.72	0.74	0.39	0.82
XLOC_001535	42.68	32.19	43.38	47.44	48	53.35	49.76	47.31	100.05	69.3	100.14	85.37	71.24	66.16	77.4	75.62	119.07	66.19	131.3	107.3	106.37	104.16	130.79	103.05	119.11	72.65	89.79	94.44	94.73	90.27	116.17	100.6	108.77	73.14	120.76	97.15	115.19	96.91	132.53	128.96	113.46	64.61	100.21	110.04	94.93	97.34	124.9	103.25	117.89
XLOC_001536	29.42	28.04	34.15	31.17	32.46	31.21	35.47	28.9	48.55	46.06	50.52	43.84	42.01	40.68	41.08	45.02	48	56.4	56.48	45.49	47.57	49.83	54.4	42.43	52.51	42.22	46.9	41.73	49	43.91	63.59	50.91	38.37	33.72	41.43	32.88	42.36	36.16	43.9	37.06	52.2	53.12	50.54	47.13	46.54	49.59	46.55	46.19	49.33
XLOC_001537	2.85	2.69	3.48	3.56	3.06	1.95	3.26	2.75	1.8	2.12	1.59	1.99	2.64	2.67	3.68	2.7	1.78	2.3	1.79	2.67	1.02	1.96	2.48	3.17	1.56	1.24	3.02	2.34	1.54	2.11	1.41	2.17	1.83	1.59	2.36	2.78	1.06	1.78	1.43	1.64	1.07	2.03	1.68	2.11	1.27	2.07	1.68	2.33	3.27
XLOC_001538	3.89	3.84	1.77	3.94	3.89	3.95	3.45	3.02	6.09	8.18	2.17	7.18	6.38	4.51	4.91	4.94	3.21	3.95	2.14	6.18	4.7	4.07	5.21	3.86	1.68	2.96	2.42	5.22	5.79	4.2	2.67	2.26	2.52	2.93	1.66	2.67	2.41	2.47	5.7	3.62	2.45	2.06	1.38	3.79	4.21	1.89	2.64	3.1	2.16
XLOC_001539	5.14	5.06	5.35	7.15	7.46	10.42	9.51	8.86	3.92	3.94	6.04	4.77	5.17	6.45	3.98	4.77	3.63	2.91	5.45	4.72	6.32	6.48	5.86	5.46	2.72	1.61	4.96	4.84	3.92	5.73	6.83	5.33	2.99	2.54	2.48	4.03	2.84	4.19	3.94	3.49	5.39	6.76	9.31	10.22	9.12	10.84	10.26	10.26	4.11
XLOC_001540	0	0	0	0	0	0	0	0.06	0	0.05	0.32	0	0.11	0.06	0.02	0.08	0.67	0.44	0.45	0.4	0.37	0.04	0.36	0.44	0.52	0.23	0.04	0	0.26	0	0.06	0	0.05	0.41	0.39	0.17	0.39	0.43	0.08	0.9	0	0.08	0.04	0	0	0	0	0.02	0.31
XLOC_001541	5.63	5.62	6.5	4.44	6.89	3.36	5.51	5.37	3.39	3.62	3.51	3.56	4.19	2.94	3.64	3.62	2.53	3.26	2.38	2.82	3.01	1.65	2.47	2.52	2.71	4.15	4.97	4.43	3.99	3.37	2.92	4.85	2.89	3.53	3.37	3	2.3	1.83	2.71	1.33	1.97	4.14	3.67	3.48	2.89	3	3.44	4.03	2.32
XLOC_001542	0.81	0.73	0.62	0.21	0.09	0.31	0.41	0.28	0.21	0.09	0.21	0.26	0.24	0.36	0.17	0.23	0.03	0.03	0.18	0.31	0.49	0.05	0.22	0.19	0.3	0.35	0.13	0.14	0	0.19	0.24	0.25	0.03	0.43	0.21	0	0.08	0.28	0.37	0.31	0.5	0.2	0.23	1.09	0.03	0	0.12	0.24	0.46
XLOC_001543	0	0	0	0	0	0	0	0	0.36	0.13	0.25	0.48	0.31	0.41	0.53	0.22	0.22	0.03	0.15	0.05	0	0.06	0.11	0	0.05	0	0.05	0	0.21	0	0.1	0	0.03	0.04	0.13	0.09	0.45	0.1	0.44	0.65	0	0	0	0	0	0	0	0	0.05
XLOC_001544	0	0	0	0	0	0	0	0	0.36	0.32	1.11	0.58	1.99	1.26	1.28	1.31	0.95	1.38	1.77	1.24	1.11	1.04	0.79	1.42	1.3	0.55	0.88	1.65	0.53	1.27	0.76	0.99	0.79	1.05	0.62	0.6	0.41	0.83	0.71	0.27	0.68	0.62	1.33	0.69	1.21	1.34	1.06	1.03	0.96
XLOC_001545	0.53	0.79	1.19	0.67	0.79	0.74	0.39	0.9	1.47	1.35	0.89	0.73	0.72	1.05	1.18	1.02	1.81	1.79	1.46	1.04	0.97	1.75	1.27	1.1	1.52	1.4	1.5	1.08	0.3	0.73	1.29	0.49	1.04	2.41	1.5	0.26	1.33	0.88	1.98	0.72	1.82	1.66	1.08	1.29	1.52	1.83	1.38	0.8	1.87
XLOC_001546	0.33	0.4	1.03	1.58	1.64	1.31	1.07	0.9	0.21	0.49	0.62	0.58	0.97	0.98	1.24	0.36	0.6	0.92	0.78	0.55	0.49	0.8	0.47	0.89	0.55	0.9	0.97	0.88	0.61	0.77	0.13	0.77	0.67	1.41	0.7	1.14	0.41	0.43	1.35	0.5	0.43	1.29	1.17	0.81	0.71	1.19	0.99	1.42	0.81
XLOC_001547	0.32	0.22	0.14	0.15	0	0	0.12	0	0.08	0.1	0	0.03	0	0	0	0	0.05	0.09	0	0	0.12	0	0	0.11	0	0.07	0	0	0	0	0.07	0.2	0.05	0	0	0.13	0	0.4	0	0.29	0.68	0	0	0.1	0	0.08	0.04	0	0
XLOC_001548	0.08	0.13	0.01	0.36	0.27	0.29	0.13	0.2	0	0	0	0	0	0	0	0	0	0	0	0	0	0	0	0	0	0	0	0.01	0	0	0	0	0	0	0	0.02	0	0	0	0	0	0.15	0	0	0	0	0	0	0.02
XLOC_001549	4.18	8.2	5.5	6.36	7.07	6.25	7.41	5.18	0.42	0.74	0.46	0.34	0.19	0.3	0.4	0.26	0.37	0.66	0.4	0.61	0.6	0.66	0.85	0.71	0.34	0.61	0.24	0.47	0.64	0.6	0.41	0.53	0.35	0.66	0.26	0.4	0.35	0.54	0.51	0.37	0.72	0.6	0.64	0.56	0.87	0.85	0.51	0.61	0.45
XLOC_001550	0.75	0.95	0.5	0.69	1.03	1.21	1.06	1.07	0.1	0.31	0.14	0.16	0.35	0.49	0.11	0.25	0.14	0.14	0.14	0.17	0.07	0.24	0.07	0.28	0.13	0.19	0.18	0.09	0.23	0.55	0.32	0.14	0.19	0.2	0.2	0.19	0.18	0.22	0.19	0.56	0.21	0.23	0.05	0.09	0.32	0.33	0.24	0.39	0.12
XLOC_001551	0	0.06	0	0	0	0.68	0.13	0.07	0	0	0	0	0	0	0	0	0	0	0	0	0	0	0	0	0	0	0	0	0	0	0	0	0	0	0	0	0	0	0	0	0	0	0.05	0	0	0	0	0	0
XLOC_001552	4.58	4.94	3.25	2.95	5.27	4.35	4.56	5.52	5.25	4.46	6.33	4.14	5.72	5.89	4.84	5.49	5.16	3.47	4.34	3.98	5.85	5.25	4.55	4.99	5.25	2.96	2.93	2.76	6.33	3.82	4.38	4.99	5.45	3.54	5.59	4.83	8.02	8.83	6.45	7.32	5.22	3.46	2.95	3.2	6.31	3.18	5.03	5.04	4.11
XLOC_001553	0.23	0.03	0.03	0.68	0.2	0.53	0.02	0.46	1.08	0.59	0.59	1.12	1.74	2.34	1.34	1.39	0.91	0.99	0.66	0.66	0.68	1.24	1.75	1.59	0.6	0.47	0.41	0.73	0.75	0.95	1.66	1	1.26	0.84	0.53	0.8	0.56	0.98	0.73	1.66	0.91	1.93	1	1.14	0.8	2.11	1.44	1.52	1.05
XLOC_001554	0.1	0.4	0.25	0.37	0.19	0.06	0.5	0.04	0.13	0.05	0.11	0.1	0.11	0.19	0.19	0.4	0.27	0.25	0.5	0.19	0.29	0.42	0.41	0.19	0.11	0.08	0.19	0.22	0.14	0.79	0.3	0.03	0.07	0.11	0.11	0.05	0.17	0.48	0.4	0.03	0.04	0.13	0.19	0.09	0.13	0.16	0.12	0.38	0.14
XLOC_001555	0	0	0	0	1.28	0	0.47	0	0	0	0.04	0.08	0.59	0	0.48	0.04	0	0.05	0	0	1.18	0	0.58	0.25	0	0	0	0.04	1.04	0	0.86	0	0	0	0	0	0.69	0	0.42	0	0	0.04	0	0.07	1.38	0	0.25	0	0
XLOC_001556	0.05	0.22	0.33	0.15	0.5	0.04	0.34	0.41	0.24	0.22	0.17	0.12	0.08	0.13	0	0.19	0.07	0.2	0	0.18	0.13	0.06	0.15	0.56	0.16	0.23	0.1	0.34	0.14	0.11	0.25	0.11	0.03	0.31	0.17	0.18	0.32	0.34	0.32	0.1	0.05	0.2	0.44	0.09	0.03	0	0.19	0.19	0
XLOC_001557	14.98	16.54	17	13.76	15.71	20.49	14.7	18.76	16.18	14.53	17.63	14.74	15.77	14.39	16.67	16.29	9.54	10	12.04	10.17	12.08	15.07	13.13	11.95	8.82	8.4	11.89	8.93	9.51	12.05	11.85	10.58	17.75	18.8	26.1	17.87	18.42	34.72	21.39	25.29	9.78	11.66	12.08	12.07	11.62	10.53	13.63	12.4	9.9
XLOC_001558	0	0.01	0.06	0.03	0.24	0.04	0.04	0.02	1.44	1.18	2.03	3.43	2.14	3.89	1.18	1.41	3.55	3.48	5.28	5.36	4.23	4.21	4.31	4.66	2.45	2.24	3.81	6.35	2.8	2.59	2.58	1.72	1.25	1.41	1.37	1.2	1.34	0.86	1.45	1.41	2.51	2.33	1.83	2.55	1.59	1.35	1.94	1.71	5.3
XLOC_001559	0.11	0.08	0	0.14	0.11	0	0	0.31	0.44	0.21	0.18	0.3	0	0.03	0.16	0.2	0.44	0	0.12	0.22	0.26	0	0.09	0.15	0.35	0.06	0.36	0.99	0.25	0	0.43	0.07	0.37	0	0.27	0.17	0.25	0.18	0.4	0.19	0.54	0.25	0.16	0.52	0	0.69	0.31	0.16	0.06
XLOC_001560	2.09	2.99	2.59	3.12	4.05	2.61	3.42	3.44	2.76	2.38	2.57	2.55	2.04	2.63	1.86	2.72	1.97	3.48	3.17	3.05	3.05	4.24	2.82	2.44	1.04	1.63	2.84	2.48	2.03	2.63	2.37	2.42	3.45	2.71	2.17	1.25	2.1	1.08	2.76	4.32	1.7	2.35	2.51	2.99	2.72	2.48	4.14	5.16	2.03
XLOC_001561	0.72	0.56	0.46	0.54	0.26	0.62	0.76	0.77	0.11	0.02	0.08	0.1	0.14	0.13	0.4	0.2	0.15	0.16	0	0.15	0.1	0.23	0.3	0.19	0.11	0	0.49	0.08	0.63	0.18	0	0.21	0	0.06	0.18	0.26	0.03	0.12	0.31	0.09	0.31	0.1	0.38	0.15	0.09	0.2	0.2	0.15	0.04
XLOC_001562	0	0	0	0	0	0	0	0	0.06	0.12	0.25	0	0	0.02	0.09	0	0.6	0.46	0.07	0.22	0.09	0.04	0.13	0	0.65	0.14	0	0.24	0.18	0.02	0	0.08	0.52	0.19	0.33	0.22	0.42	0.17	0.34	0.66	0	0	0.04	0.02	0	0	0	0	0.15
XLOC_001563	0.44	1.15	0.88	1.01	0.81	0.85	0.79	0.5	0.17	0.36	0.22	0.18	0.16	0.17	0.08	0.14	0.52	0.64	0.92	0.64	0.57	0.52	0.69	0.4	0.68	0.48	0.55	0.54	0.44	0.11	0.08	0.1	0.39	0.56	0.14	0.42	0.3	0.33	0.17	0.36	0.42	0.68	0.2	0.42	0.65	0.07	0.44	0.34	0.42
XLOC_001564	1.17	0.58	0	0.81	1.31	0.71	0	0.21	2.33	0.72	0	0.56	1.06	0.81	0.02	0.42	1.77	0.51	0	0.57	1.74	1.58	0	0.88	1.25	0.87	0.13	0.53	2.46	1.11	0.06	1.14	1.34	1.24	0	1.04	1.74	0.6	0	1.97	1.55	0.79	0	0.52	1.5	0.6	0	1.05	0.97
XLOC_001565	0.1	0	0	0.04	0	0.09	0	0	0.24	0.29	0.03	0.05	0.11	0.45	0.17	0.06	0	0	0.1	0.05	0.18	0.73	0.28	0.13	0	0.14	0.14	0.08	0.03	0.39	0.3	0.09	0.07	0.07	0	0.05	0.09	0.68	0.17	0.11	0	0	0	0	0.21	0.33	0.07	0.17	0.23
XLOC_001566	0	0.36	0.38	0.5	0	0.43	0.1	0.34	0.04	0.07	0.09	0.28	0.27	0.24	0.04	0.22	0	0.25	0.14	0.1	0.42	0.04	0.14	0.24	0.1	0.56	0.24	0.07	0.02	0.11	0.09	0.13	0.05	0.31	0.13	0.35	0.06	0.29	0.2	0.16	0.33	0.14	0.1	0.3	0.23	0.06	0.05	0.34	0
XLOC_001567	0.67	0.5	0.69	0.47	0.94	0.76	0.66	0.7	0.5	0.36	0.94	0.53	0.39	0.44	0.61	0.88	0.53	0.53	0.41	0.42	0.47	0.55	0.42	0.69	0.59	0.13	0.56	0.21	0.25	0.24	0.26	0.28	0.21	0.32	0.65	0.7	0.55	0.32	0.5	0.35	0.47	0.51	0.75	0.65	0.72	0.76	0.91	0.55	0.35
XLOC_001568	7.66	7.74	7.12	8.93	10.17	12.26	9.56	9.26	14.67	15.31	14.69	12.21	11.48	12.7	10.19	12.19	20	15.82	15.65	17.14	15.97	14.88	14.77	14.29	19.51	18.34	11.98	15.96	10.99	11.59	13.06	10.73	14.41	13.69	11.04	13.81	15.88	17.22	13.3	13.42	18.58	13.67	10.35	12.26	9.38	10.57	8.21	11.16	20.78
XLOC_001569	0.19	0.21	0.14	0.3	0.31	0.27	0.58	0.22	0.18	0.07	0.36	0.03	0.14	0.36	0.24	0.18	0.24	0.09	0.13	0.12	0	0.31	0.55	0.05	0.25	0.07	0	0	0.08	0.41	0.2	0	0.32	0	0	0.06	0	0.52	0.44	0.07	0.03	0	0.25	0.35	0.22	0.11	0.26	0.09	0.21
XLOC_001570	28.96	27.5	26.22	30.94	40.97	37.29	37.25	35.17	21.8	17.89	17.9	22.99	20.63	19.71	18.13	21.17	24.09	20.82	20.29	25.16	26.11	24.45	24.42	26.63	22.83	18.34	18.64	22.65	20.74	20.76	26.46	23.2	23.28	19.83	18.3	23.91	23.86	24.19	20.62	25.43	28.85	20.62	17.35	21.49	21.87	20.63	20.31	25.39	25.05
XLOC_001571	0.15	0.14	0.29	0.12	0	0	0	0.13	0.03	0.32	0	0.05	0	0.06	0.08	0.23	0	0.11	0.15	0.15	0.05	0.12	0.04	0.17	0.14	0.17	0.14	0.18	0	0.15	0	0.22	0.11	0.11	0.33	0.1	0.09	0.16	0.12	0.17	0.17	0.14	0.11	0.08	0.18	0.4	0.24	0	0.06
XLOC_001572	2.97	2.55	3.26	3.05	2.98	4.48	3.98	3.59	1.08	0.92	1.29	0.88	0.67	0.84	0.97	0.92	1.28	0.67	1.12	0.94	1.15	1.39	1.06	1.18	1.16	0.87	1.44	0.86	0.72	1.26	1.48	1.24	1.03	0.8	1.09	0.58	1.01	1.25	0.98	0.65	1.39	1.75	2.17	1.3	1.8	2.51	1.48	1.39	0.87
XLOC_001573	3.06	3.54	3.46	3.83	3.99	4.54	4.25	3.58	0.8	0.89	0.84	0.75	0.97	1.17	0.98	0.8	0.86	1.12	1.29	1	0.66	1.09	1	0.87	0.91	0.73	0.92	0.92	0.89	0.93	1.35	1.06	1.15	0.98	0.49	0.55	0.63	0.8	0.59	0.62	1.44	1.18	1.16	1.34	1.59	1.26	1.9	1.65	0.92
XLOC_001574	14.81	18.54	10.84	13.39	8.38	17.15	13.3	15.52	6.92	6.72	7.15	3.51	1.49	4.57	2.98	3.95	18.22	13.15	9.38	11.22	5	9.46	6.56	7.7	17.67	13.45	6.44	8.76	4.55	8.61	7.34	8.82	14.34	11.06	5.62	5.3	3.97	6.65	4.81	5.25	20.41	14.57	10.07	11.88	6.79	11.39	8.11	11.11	17.47
XLOC_001575	4.94	6.36	5.47	6.35	5.68	8.18	7.22	5.69	2.09	2.11	2.56	2.71	2.91	3.31	2.81	2.5	1.63	2.63	2.49	2.08	2.45	2.75	2.46	2.26	1.85	1.92	2.81	1.76	2.13	2.88	3.25	2.4	2.04	3.05	2.63	2.3	2.16	4.14	2.82	2.07	2.34	2.62	2.5	2.84	2.41	2.7	2.55	2.37	2.4
XLOC_001576	0.22	0.28	0.12	0.36	0.05	0.46	0.45	0.11	0.27	0.04	0.04	0.06	0.03	0.04	0.08	0.07	0.06	0.17	0.12	0.19	0.02	0.06	0.04	0	0.08	0.05	0.19	0.18	0.05	0.1	0.05	0.13	0.18	0.09	0.09	0.05	0.08	0	0	0	0.12	0.07	0.07	0.05	0.06	0	0.13	0	0.16
XLOC_001577	0.2	0.33	0	0.13	0.13	0.37	0.09	0.12	0.21	0.1	0.46	0.31	0.16	0.32	0.18	0.13	0.36	0.42	0.43	0.77	0.27	0.52	0.31	0.62	0.44	0.78	0.31	0.53	0.56	0.61	0.65	0.73	0.29	0.9	0.62	0.39	0.28	1.43	0.42	0.04	0.38	0.61	0.81	0.68	0.66	0.71	0.58	0.31	0.11
XLOC_001578	0.27	0.47	0.54	0.34	0.58	0.42	0.34	1.04	0.22	0.56	0.42	0.31	0.58	0.39	0.86	0.5	0.12	0.34	0.22	0.36	0.48	0.2	0.55	0.46	0.06	0.68	0.78	0.64	0.1	0.42	0.17	0.2	0.31	0.32	0.8	0.47	0.05	0	0.5	0.18	0.06	0.41	0.66	0.4	0.48	0.87	1.27	0.73	0.3
XLOC_001579	0.98	0.92	1.12	1.24	1	1.09	0.9	0.72	0.52	0.97	1.29	1.2	0.74	1.06	0.63	0.75	1.48	1.77	1.61	1.07	0.59	0.86	0.89	0.79	1.26	1.29	1.44	1.19	0.82	0.94	0.89	0.85	0.76	1.14	1.55	1.38	0.92	0.56	1.29	0.67	0.98	1.2	1.15	0.95	0.68	0.97	0.45	0.68	0.91
XLOC_001580	0.32	0.59	0.25	0.46	0.6	0.66	0.75	0.44	0.22	0.12	0.15	0.46	0.28	0.3	0.63	0.35	0.09	0.44	0.38	0.23	0.16	0.18	0.23	0.95	0.21	0.05	0.33	0.27	0.09	0.09	0.6	0.11	0.27	0.48	0.19	0.26	0	0.21	0.37	0.23	0.14	0.45	0.08	0.04	0.66	0.44	0.36	0.26	0.13
XLOC_001581	0.02	0	0	0.02	0	0.06	0.21	0	0.04	0.18	0.15	0.34	0.34	0.68	0.16	0.13	0.09	0.37	0.11	0.09	0.02	0.25	0.18	0.14	0.03	0.11	0.22	0.02	0	0.09	0.11	0.17	0	0.18	0.11	0.31	0.04	0.14	0.24	0.03	0.14	0.05	0.05	0.05	0.11	0.05	0.05	0.23	0.05
XLOC_001582	59.86	69.97	111.5	90.52	74.57	58.2	79.66	87.18	408.77	410.31	307.1	366.19	369.85	437.51	507.79	431.4	289.99	480.12	360.61	283.48	243.81	228.45	325.3	265.45	348.37	340.08	307.54	217.42	264.58	215.33	327.12	258.29	292.21	351.56	263.57	236.31	200.74	217.06	306.2	165.44	226.32	230.72	241.08	186.38	231.97	214.78	279.08	239.84	215.63
XLOC_001583	19.63	20.36	33.92	26.47	20.62	17.12	22.68	23.2	187	178.08	115.03	155.84	184.57	216.07	258.87	216.64	114.39	190.05	108.51	91.76	79.13	76.99	98.25	89.85	131.1	114.89	97.52	70.14	80.55	77.85	102.26	78.87	99.34	104.73	76.82	74.56	72.29	76.26	114.82	56.91	78.22	73.46	71.34	52.65	74.65	71.8	81.83	68.89	86.44
XLOC_001584	0.03	0.25	0.07	0.05	0.17	0.12	0.09	0.06	0.36	0.73	0.46	0.23	0.26	0.29	0.28	0.29	0.16	0.48	0.21	0.03	0.34	0.16	0.22	0.12	0.23	0.71	0.27	0.05	0.04	0.61	0.22	0.02	0.29	0.4	0.57	0.53	0.09	0.77	0.2	0.27	0.41	0.45	0.19	0.41	0	0.22	0	0.14	0.15
XLOC_001585	0.39	0.29	0.3	0.45	0.41	0.31	0.51	0.39	0.56	0.69	0.78	0.54	0.38	0.43	0.59	0.34	0.55	0.55	0.56	0.71	0.48	0.41	0.46	0.64	0.55	0.45	0.3	0.7	0.4	0.46	0.6	0.59	0.88	0.55	0.67	1.02	0.61	1.15	0.84	0.98	0.92	0.33	0.7	0.54	0.26	0.44	0.45	0.33	0.63
XLOC_001586	2.71	1.07	1.57	1.41	1.69	2.11	1.7	2.16	2.48	2.57	2.92	3	2.32	2.8	2.89	2.79	3.26	1.74	2.41	4.18	2.03	2.33	2.1	2.09	2.33	1.74	2.78	2.37	1.24	1.74	3.47	0.97	1.77	2.89	2.72	1.87	3.13	2.39	2.68	3.5	2.59	1.95	2.96	2.77	2.15	2.83	3.41	3.23	2.61
XLOC_001587	8.67	9.15	7.98	9.67	6.6	10.99	11.23	9.4	6.57	5.94	6.41	6.22	6.7	6.05	7.02	5.84	6.75	5.84	9.85	7.9	7.93	10.8	11.24	8.09	5.29	3.96	5.37	6.91	4.36	5.86	11.09	5.23	4	4.93	5.7	6.92	5.65	7.08	7.83	5.23	7.54	6.41	8.32	8.08	7.44	8.86	10.03	7.15	6.11
XLOC_001588	0.41	0.6	0.76	1.02	0.29	1.06	0.32	0.42	0.31	0.22	1.43	0.34	0.25	0.6	0.29	0.27	0.72	0.75	0.42	0.97	0.27	0.79	0.84	0.25	0.82	0.64	0.53	0.76	0.77	0.74	0.47	0.29	0.3	0.57	0.22	0.17	0	0.91	0.14	0.4	0.39	0.58	0.46	0.18	0.87	0.39	0.2	0.4	0.6
XLOC_001589	25.74	31.46	18.65	29.31	20.92	30.53	21.81	23.97	8.43	9.52	11.73	14.82	18.36	21.42	15.63	14.78	11.83	15.08	10.72	10.27	9.91	10.08	10.01	9.47	10.32	9.87	6.95	8.35	6.16	6.58	6.81	6.36	9.99	10.82	7.48	10.07	8.48	9.75	13.1	7.62	15.12	17.65	9.59	11.57	9.95	12.12	11.8	10.86	10.43
XLOC_001590	1.94	1.55	1.69	1.53	1.62	1.42	1.32	1.64	1.84	1.84	1.74	1.78	2	1.69	2.35	2.11	1.36	1.7	0.98	1.69	1.67	1.93	1.63	2.41	1.2	1.32	1.35	2	1.01	1.73	0.65	1.39	1.17	1.26	0.74	1.26	1.49	0.88	1.26	1.36	1.25	1.66	1.87	1.87	1.51	1.86	1.85	1.61	1.42
XLOC_001591	0.23	0.4	0.24	0.46	0.28	0.33	0.26	0.25	0.28	0.28	0.21	0.04	0.06	0.16	0.06	0.09	0.16	0.07	0.16	0.3	0.12	0.47	0.18	0.31	0.2	0.35	0.53	0.25	0.32	0.09	0.04	0.14	0.44	0.38	0.21	0.07	0.4	0.71	0.09	0.17	0.06	0.15	0.23	0.22	0.45	0.23	0.14	0.21	0.23
XLOC_001592	0.16	0.21	0.36	0.43	0.14	0.15	0.46	0.22	0.2	0.3	0.58	0.37	0.09	0.25	0.4	0.18	0.16	0.32	0.91	0.28	0.24	0.03	0.67	0.42	0.26	0.17	0.88	0.62	0.25	0.25	0.42	0.29	0.05	0.34	0.48	0.4	0.3	0.32	0.62	0.36	0.09	0.07	0.65	0.09	0.18	0.19	0.3	0.16	0.09
XLOC_001593	0.03	0.15	0.02	0.09	0.08	0.04	0.02	0.1	0.34	0.24	0.51	0.67	0.63	0.43	0.46	0.54	0.03	0.26	0.29	0.28	0.17	0.02	0.04	0.14	0.02	0.14	0.35	0.1	0.05	0.1	0.02	0.03	0.12	0.12	0.09	0.26	0.12	0.07	0.27	0.08	0.12	0.16	0.18	0	0.02	0.08	0.09	0.08	0.11
XLOC_001594	1.09	1.18	1.23	1.25	1.49	1.42	1.28	1.63	0.53	0.63	0.79	0.68	0.94	1.06	0.67	0.58	0.37	0.37	0.44	0.39	0.4	0.49	0.49	0.42	0.54	0.59	0.58	0.56	0.52	0.5	0.66	0.56	0.51	0.56	0.6	0.41	0.46	0.49	0.6	0.55	0.82	1.03	0.96	0.81	1.03	0.6	0.95	0.59	0.39
XLOC_001595	0	0	1.99	0	0	0	0	0.03	0	0	0.44	0	0	0	0	0	0	0	0.22	0	0	0	0	0	0	0	0.58	0	0	0	0	0	0	0	0.18	0	0	0	0	0	0	0	0.28	0	0	0	0	0	0
XLOC_001596	0.93	0.52	0.79	0.71	0.78	0.8	0.64	0.94	0.14	0.35	0.83	0.12	0.23	0.21	0.13	0.29	0.46	0.85	0.7	0.52	0.36	0.48	0.39	0.85	0.41	0.31	0.35	0.36	0.41	0.16	0.04	0.53	0.41	0.34	0.46	0.1	0.31	0.62	0.65	0.15	0.55	0.34	0.48	0.48	1.14	0.6	1.15	0.47	0.26
XLOC_001597	0	0.05	0	0.81	0	0.14	0	0	0.05	0.08	0	0	0	0.04	0.04	0.05	0	0	0.4	0	0	0.1	0.19	0	0.04	0.17	0	0.12	0	0.14	0	0	0.06	0.18	0	0.15	0	0.33	0.18	0	0.04	0.09	0.18	0.04	0.05	0.09	0.05	0	0
XLOC_001598	1.65	1.07	1.62	2.2	1.7	2.4	2.14	1.5	3.13	2.85	3.46	4.16	3.35	4.61	2.21	2.85	4.26	3.65	4.45	2.86	2.89	4.34	3.68	3.57	2.34	1.94	2.68	2.97	2.06	2.49	5.1	3.07	2.56	1.87	1.9	2.91	2.04	2.06	2.83	2.84	5.39	3.6	2.93	3.15	2.58	4.57	3.45	3.82	3.65
XLOC_001599	0.33	0.01	0.02	0.1	0.09	0.21	0	0.02	0.31	0.22	0	0.26	0.18	0.07	0.08	0.28	0.12	0.11	0	0.11	0.16	0.29	0.16	0.22	0.34	0.01	0.02	0.12	0.15	0.19	0.12	0.08	0.35	0.06	0.02	0.09	0.15	0.47	0.1	0.07	0.29	0.05	0	0.07	0.21	0.37	0.1	0.06	0.2
XLOC_001600	1.34	1.69	1.5	1.81	2.42	2.09	2.75	2.42	1.14	1.29	0.53	1.36	1.73	1.02	1.8	1.34	0.75	0.88	0.64	1.61	1.55	0.77	1.28	2.22	0.77	0.62	0.43	0.93	0.7	0.42	1.28	1.57	0.44	0.54	0.33	0.78	0.84	0.53	0.88	1.76	1.29	1.22	0.76	2.27	1.18	1.05	1.69	2.16	0.63
XLOC_001601	0.17	0.03	0.06	0.05	0.12	0.24	0.17	0.35	0.35	0.28	0.68	0.09	0.18	0.26	0.07	0.16	1.48	1.59	1.15	1.78	1.26	1.97	1.21	1.37	1.1	0.83	0.83	1.24	0.93	1.01	0.53	1.07	0.87	1	0.69	0.45	0.72	1.26	0.63	0.78	1.25	0.75	1.64	1.1	0.89	1.1	0.59	1.34	2.14
XLOC_001602	0.28	0.3	0.21	0.17	0.09	0.36	0.22	0.22	0.06	0.09	0.03	0.11	0.12	0.15	0.09	0.14	0.08	0.06	0.11	0.08	0.2	0.08	0.14	0.06	0.11	0.11	0.07	0.01	0	0.11	0.05	0.09	0.01	0.04	0.1	0.03	0.09	0.07	0.1	0.02	0.04	0.13	0.14	0.03	0.1	0.17	0.08	0.04	0.02
XLOC_001603	1.92	1.86	2.09	2.22	2.68	3.64	3.41	5.14	5.43	6.06	3.32	6.61	5.51	8.16	9.42	10.36	0.96	1.34	2.39	1.01	4.8	3.62	5.22	10.36	1.11	1.17	2.65	1.64	4.69	4.59	7.1	5.04	3.06	4.27	6.53	6.19	8.25	9.8	8.11	10.71	1.36	1.5	1.76	1.45	2.84	3.46	2.84	5.27	0.53
XLOC_001604	0.51	0.81	0.44	0.69	0.8	0.68	0.22	1.02	0.13	0.1	0.2	0.2	0.33	0.26	0.18	0.27	0.11	0.25	0.16	0.21	0.12	0.33	0.19	0.26	0.16	0.37	0.3	0.17	0.21	0.11	0.25	0.07	0.07	0.19	0.02	0.07	0.19	0.21	0.07	0.17	0.1	0.07	0.1	0.07	0.02	0.09	0.09	0.14	0.15
XLOC_001605	0.57	0.81	0.71	0.85	0.53	0.68	0.72	0.69	1.21	1.85	2.96	1.72	0.92	0.91	1.11	0.76	1.12	1.35	2.16	1.91	0.95	1.25	1.23	1.28	1.08	1.89	1.82	1.65	0.82	1.15	0.88	0.87	1.31	1.76	3.26	1.99	1.62	2.16	1.65	3.7	0.94	0.84	1.63	0.9	0.74	1.13	0.71	0.8	0.82
XLOC_001606	3.16	2.36	2.13	3.03	2.82	2.86	2.62	2.47	1.1	0.81	0.93	0.84	0.97	0.71	0.74	0.78	0.97	0.85	0.7	0.84	1.04	0.9	0.73	0.82	1.02	0.86	1.15	0.61	0.98	0.7	0.63	0.74	1.94	1.55	1.21	1.32	0.97	0.99	0.57	0.74	1.68	0.92	0.96	0.84	1.19	1.05	1.1	0.78	1.22
XLOC_001607	1.51	1.67	1.95	1.56	1.55	0.94	1.47	1.68	1.35	1.2	1.29	1.39	2.24	1.86	2.51	1.74	1.16	1.95	0.85	1.35	1.83	1.24	1.02	1.45	1.71	1.25	1.26	1.18	0.99	1.21	0.91	1.39	1.33	1.75	1.03	1.02	1.2	1.45	1.73	0.94	1.22	1.49	1.26	0.99	1.29	1.13	1.8	1.77	1.15
XLOC_001608	0	0	0	0	0	0.07	0	0	0	0	0	0.08	0	0	0	0	0	0	0	0	0.07	0.18	0	0	0.08	0	0.04	0	0	0.05	0	0.37	0.05	0.11	0	0	0	0	0	0	0.04	0	0	0.15	0.13	0	0	0	0
XLOC_001609	0.15	0.19	0.18	0.1	0.27	0.03	0.03	0.32	0.09	0.13	0.11	0.15	0.13	0.36	0.3	0.18	0.26	0.26	0.56	0.27	0.36	0.48	0.51	0.55	0.17	0.25	0.07	0.3	0.38	0.29	0.25	0.32	0.11	0.38	0.14	0	0.05	0.09	0.14	0.21	0.22	0.12	0.14	0.14	0.23	0.28	0.1	0.29	0.28
XLOC_001610	1.14	0.93	1.39	1.52	1.66	0.75	1.73	1.36	1.25	0.74	0.98	1.29	0.79	0.64	0.7	1.07	0.88	0.31	0.68	0.73	1	0.81	0.72	1.04	0.82	0.45	1.72	0.76	0.52	1.31	0.49	0.99	1.05	0.67	1.91	0.88	1.22	1.26	1.09	1.46	1.06	0.71	0.95	0.65	1.63	1.16	0.88	0.83	0.58
XLOC_001611	13.95	12.12	17.59	12.94	14.68	13.79	12.48	13.28	11.7	10.83	13.73	10.47	13.03	12.06	12.95	12.34	10.32	11.62	11.05	8.84	8.87	9.1	10	8.99	10.54	10.74	12.28	10.54	10.23	9.03	10.64	10.29	10.69	11.26	12.57	9.73	8.44	12.79	10.72	10.65	9.06	12.16	14.05	11.82	10.74	10.22	11.94	11.52	9.24
XLOC_001612	0.17	1.02	0.76	0.88	0.39	0.71	0.24	0.81	0.18	0.31	0.56	0.11	0.02	0.02	0.06	0.13	0.33	0.24	0.46	0.36	0.15	0.28	0.16	0.27	0.34	0.38	0.22	0.38	0.04	0.03	0	0.07	0.16	0.11	0.05	0.2	0.07	0.27	0.36	0.71	0.47	0.23	0.06	0.09	0.27	0.12	0.02	0.02	0.32
XLOC_001613	23.01	17.96	16.7	22	25.1	26.98	23.03	25.76	21.43	20.92	26.43	17.95	16.74	15.94	13.41	16.87	31.48	19.9	27.05	27.34	26.92	30.61	29.22	25.58	27.94	19.24	21.56	32.82	22.84	21.25	24.31	24.3	23.15	23.17	20.48	23.58	24.2	26.81	19.34	24.2	27.82	24.73	23.18	26.77	25	26.99	29.6	28.5	26.05
XLOC_001614	0.9	1.12	1.03	1.71	0.63	1.31	0.87	1.1	1.94	1.86	1.25	1.16	1.64	1.32	1.6	1.94	1.11	0.96	1.02	0.81	0.99	1.23	1.47	2.48	1.21	1.27	0.76	0.94	0.79	0.76	1.17	0.76	1.86	1.25	0.96	0.8	0.98	1.38	1.27	1.23	1.69	1.01	1.18	1.19	1.64	0.62	1.6	1.57	0.77
XLOC_001615	0.68	1.64	1.75	2.46	1.94	2.75	0.63	1.41	1.38	2.35	1.1	0.96	1.11	1.76	0.8	0.09	1.05	1.57	0.54	0.37	0.62	0.28	1.21	0.58	0.85	1.58	0.81	0.55	0.47	0.82	1.06	0.33	1.15	1.97	0.64	0.3	0.85	0.39	0.88	0.69	0.79	2.12	0.85	0.8	0.54	1.23	0.82	0.46	0.43
XLOC_001616	0.47	0.55	0.68	0.36	0.85	0.56	0.54	0.65	1.03	0.72	0.89	0.9	0.96	0.9	1.06	0.74	0.56	0.65	0.9	0.73	0.78	0.61	0.83	0.71	0.22	0.42	0.62	0.69	0.47	0.2	0.37	0.43	0.62	0.42	0.59	0.21	0.41	0.49	0.72	0.59	0.39	0.44	0.71	0.48	0.46	0.28	0.44	0.56	0.59
XLOC_001617	0.35	1	0.34	0.53	0.37	0.78	0.51	1.08	0.31	0.7	0.41	1.3	0.8	1.06	0.76	0.99	0.32	0.56	0.15	0.54	0.34	0.79	0.42	0.9	0.25	0.48	0.35	0.73	0.26	0.54	0.43	0.67	0.41	0.83	0.28	0.74	0.09	0.75	0.64	0.96	0.59	0.58	0.6	1.21	0.69	1.1	0.76	0.83	0.41
XLOC_001618	0.3	0.6	0.21	0.59	0.49	0.86	0.5	0.88	0.49	0.47	0.15	0.37	0.75	0.62	0.27	0.63	0.11	0.39	0	0.58	0.09	0.24	0.08	0.68	0.31	0	0.42	0.49	0.06	0.68	0.4	0.27	0.29	0.33	0.37	1.02	0.38	0.56	0.23	0.84	0.22	0.35	0.03	0.8	0.24	0.63	0.64	0.27	0.22
XLOC_001619	0.24	0.53	0.1	0.77	1.38	0.5	0.13	0.3	0.94	0.48	0.25	0.18	1.36	0.58	0.4	0.51	0.26	0.28	0.05	0.38	2.55	0.47	0.46	0.5	0.19	0.43	0.05	0.33	3.12	0.49	0.34	0.57	0.18	0.61	0.18	0.62	1.55	0.75	0.23	0.33	0.32	0.35	0.11	0.2	1.9	0.26	0.56	0.33	0.38
XLOC_001620	0	0.11	0.04	0.09	0	0	0	0	0	0.06	0.06	0.17	0.12	0.34	0.15	0.28	0.46	0.04	0.72	0.21	0.15	0.13	0.3	0.61	0.34	0.3	0.15	0.2	0.2	0.29	0.41	0.6	0.43	0.12	0	0	0.23	0	0	0.12	0.81	0.63	0.06	0.17	0	0.3	0	0.07	0.68
XLOC_001621	0.36	0.57	0.15	0.45	0.09	0.7	0.52	0.13	0.6	0.38	0.59	0.38	0.24	0.46	0.25	0.16	0.35	0.13	0.24	0.23	0.41	0.48	0.26	0.57	0.32	0.07	0.07	0.16	0.32	0.3	0.6	0.17	0.35	0.13	0	0.29	0.65	0.34	0.49	0.24	0.68	0.43	0.51	0.65	0.46	0.51	0.57	0.33	0.34
XLOC_001622	0	0.25	0	0.18	0.07	0.13	0.34	0.86	0.04	0.08	0	0	0.08	0	0.08	0	0.06	0	0.15	0	0.13	0.18	0	0	0	0	0	0	0	0.31	0.36	0.23	0.05	0	0	0.07	0	0	0.17	0	0	0.2	0.17	0	0	0	0.1	0.3	0
XLOC_001623	0.17	0.21	0.41	0.04	0.17	0	0.05	0.2	0.1	0.13	0.74	0.05	0.09	0.05	0.16	0.15	0.22	0.24	0.75	0.36	0.21	0.07	0.41	0.51	0.05	0.09	0.65	0.22	0.48	0.25	0.21	0.38	0.18	0.13	0.42	0.44	0.15	0.03	0.23	0.16	0.17	0.22	0.46	0.19	0.15	0.24	0.1	0.37	0.26
XLOC_001624	0	0	0	0	0	0	0	0	0	0	0	0	0	0	0	0	0	0	0	0	0	0	0	0	0	0	0	0	0	0	0	0	0	0	0	0	0	0	0	0	0	0	0	0	0	0	0	0	0
XLOC_001625	1.36	1.46	1.48	2.35	2.46	3.16	2.63	2.73	2.17	1.57	2.11	1.66	1.11	1.38	1.27	1.58	2.41	1.92	3.63	3.25	3.48	3.79	3.34	3.16	2.62	2.71	2.89	2.86	3.05	3.52	3.5	3.19	1.84	1.88	1.72	2.18	1.9	2.13	1.83	2.07	3.18	3.05	3.63	3.62	3.9	3.38	3.76	4.62	3.33
XLOC_001626	0	0	0	0.02	0	0.03	0	0.03	0.13	0.3	0.5	0.31	0.91	0.56	0.29	0.49	0.01	0.01	0.23	0.1	0.17	0.19	0.33	0.5	0.05	0	0.41	0.16	0.28	0.07	0.25	0.44	0.02	0.02	0.21	0.27	0.32	0.19	0.44	0.1	0.24	0	0.41	0.24	0.55	0.2	0.22	0.51	0.05
XLOC_001627	0.07	0.05	0.36	0.11	0.14	0.43	0.06	0.19	0.12	0.04	0.07	0.22	0.04	0	0.04	0.08	0.05	0.05	0	0	0	0	0.22	0.18	0.08	0.16	0.08	0	0.22	0.17	0.04	0.13	0.15	0.21	0.26	0.35	0	0.15	0.16	0.16	0.39	0.12	0.51	0.18	0.21	0.43	0.14	0	0
XLOC_001628	1.95	3.18	2.7	2.4	2.77	4.68	1.86	3.19	1.82	1.59	1.2	1.87	2.07	1.63	1.32	1.71	0.61	0.98	1.39	1.55	1.57	1.4	1.38	1.36	1.09	1.86	1.66	0.9	1.71	1.59	0.93	1.55	2.56	1.71	1.96	1.7	0.56	1.49	1.76	0.98	1.51	1.7	2.91	1.02	1.16	2.57	2.3	2.06	0.98
XLOC_001629	3.3	3.2	3.52	4.05	4.92	6.17	5.11	4.43	1.84	2.52	2.46	1.74	1.57	1.95	1.65	1.1	3.61	2.61	4.38	3.94	3.67	3.62	4.14	3.43	4.25	3.12	3.41	4.44	4.23	5.88	3.47	4.48	3.19	3.03	2.71	1.36	2.9	2.05	2.07	3.54	5.93	5.76	5.56	6.09	7.55	5.74	6.15	5.57	6.09
XLOC_001630	0.13	0	0.09	0.03	0.21	0.33	0.7	0.3	0.15	0.09	0.07	0.38	0.5	0.69	0.79	0.68	0.06	0.36	0.17	0.25	0.27	0.36	0.4	0.14	0.14	0.58	0.24	0.04	0	0.58	0.02	0.08	0.18	0	0.16	0	0.14	0.04	1.22	0.28	0.44	0.65	0.12	0.06	0.12	0.13	0.37	0.23	0.14
XLOC_001631	1.64	1.75	1.62	1.94	0.96	1.9	1.76	2.32	0.99	0.85	1.12	0.86	0.66	0.67	0.54	0.72	0.9	0.7	1.32	1.12	1.07	1.1	1.26	1.09	0.87	0.58	0.72	1.03	0.64	1.02	1.34	0.54	1.3	1.18	1.01	0.79	0.86	0.92	1.09	0.83	1.16	1.15	2.22	1.8	2.32	1.43	1.69	1.56	0.93
XLOC_001632	1.48	1.27	1.22	1.34	1.21	1.5	2.07	1.25	0.41	0.48	0.6	0.86	0.91	1.05	0.78	0.79	0.52	0.51	0.87	0.77	0.84	0.93	0.88	0.85	0.48	0.87	0.79	0.49	0.61	0.65	0.32	0.7	0.45	0.88	1.45	0.61	0.86	1.53	1.1	0.6	1.19	0.8	0.65	0.76	0.89	0.77	0.76	0.85	0.55
XLOC_001633	3.75	5.11	5.38	4.22	6.14	5.85	4.85	4.66	3.7	4.24	5.02	4.57	5.27	4.64	4.83	3.42	4.42	4.8	5.69	4.96	5.92	5.18	6.05	5.12	5.01	4.71	5.42	5.08	6.03	5.78	6.84	5.37	4.64	5.05	4.88	4.49	5.27	5.79	5.67	4.78	5.03	5.24	5.2	5.41	6.84	6.53	6.47	5.15	4.27
XLOC_001634	0.35	0.36	0.04	0	0.12	0	0.32	0.21	0.14	0.06	0.34	0.16	0.22	0.13	0.2	0.34	0.05	0	0.3	0.06	0.16	0.07	0.05	0.1	0.13	0	0.17	0.06	0.11	0	0.25	0.18	0.04	0.22	0.17	0	0.15	0.18	0	0	0	0.06	0.1	0.18	0.17	0	0	0.2	0
XLOC_001635	1.64	0.92	0.56	1.45	0.57	0.13	0.71	0.21	0	0	0	0	0.08	0	0.03	0	0	0.03	0	0	0	0.23	0	0.04	0.08	0.16	0	0.08	0.09	0.14	0	0	0	0.07	0	0	0	0.05	0	0.05	0.05	0.05	0.11	0	0	0.03	0	0	0
XLOC_001636	0.67	0.52	0.33	0.92	0.55	0.2	0.76	0.18	0	0.01	0.03	0	0	0	0.03	0	0	0.05	0.02	0	0.02	0.12	0.04	0.02	0.01	0	0	0	0	0	0.03	0	0.01	0	0.06	0	0	0	0	0	0.01	0.06	0	0	0.02	0.03	0.05	0	0
XLOC_001637	0.38	0.15	0.22	0.62	0.33	0.12	0.38	0.06	0	0	0.03	0	0.01	0	0	0	0	0.01	0	0	0	0	0	0	0	0.07	0.01	0.01	0	0.01	0	0	0	0	0.01	0	0	0	0	0	0.01	0.02	0	0.02	0	0.14	0	0.03	0
XLOC_001638	0.32	0.38	0.13	0.47	0.16	0.15	0.42	0.07	0	0	0	0	0	0	0	0	0	0.03	0	0.02	0.04	0.02	0	0	0.01	0	0	0	0	0.01	0	0	0.04	0.01	0	0	0	0	0	0	0	0	0.03	0	0	0	0.08	0	0.02
XLOC_001639	0.09	0.13	0.18	0.54	0.17	0.1	0.24	0.05	0	0	0	0	0	0	0	0	0	0	0	0	0	0.05	0.03	0	0	0	0.01	0	0.07	0	0	0.02	0.03	0	0	0	0	0	0	0	0	0.01	0	0	0	0	0	0	0
XLOC_001640	0.27	0.13	0.33	0.55	0.15	0.3	0.36	0.11	0	0	0.01	0	0.03	0.01	0	0	0	0.04	0.01	0.02	0.02	0	0.03	0	0.01	0.03	0	0	0	0	0	0.01	0.01	0.02	0	0	0	0	0	0	0.04	0.07	0	0	0.06	0.02	0.03	0.03	0
XLOC_001641	2.68	2.15	1.93	2.81	2.57	4.03	2.63	2.59	2.23	0.98	2.2	3.19	2.42	3.06	2.86	2.56	3.27	1.47	3.72	3.09	3.21	4.17	3.07	2.99	2.34	0.68	2.87	1.75	2.49	2.71	3.68	1.8	2.12	1.15	2.04	1.4	1.88	3.22	2.67	1.05	2.61	0.89	1.61	4.15	2.14	3.64	3.6	1.48	2.18
XLOC_001642	0.95	1.38	0.5	0.62	0.58	0.97	0.93	0.97	0.69	0.62	0.64	1.18	0.65	0.89	0.57	0.49	0.91	1.08	0.88	0.71	0.71	0.51	0.47	0.72	0.56	0.83	0.27	0.74	0.75	0.82	0.68	0.79	0.67	1.35	0.47	1.56	0.58	0.58	0.52	0.76	1.1	1.29	1.11	1.06	1.03	0.99	1.03	0.72	0.32
XLOC_001643	1.08	1.86	1.75	1.46	1.62	1.26	1.24	1.87	1.05	0.82	1.21	1.26	1.34	1.15	1.12	1.21	0.67	0.95	1.19	0.87	0.93	0.65	1.41	1.07	0.85	1.01	1.45	1.32	0.75	0.54	0.76	1	1.02	1.41	1.51	1.08	0.51	0.65	1.45	1.16	1.04	1.59	2.12	1.99	1.69	1.82	1.48	2.6	0.69
XLOC_001644	1.29	1.68	1.33	1.47	1.93	1.16	0.73	1.29	0.65	0.84	0.42	0.82	1.07	0.89	0.71	1.07	0.57	0.77	0.24	0.49	0.46	0.47	0.42	0.49	0.43	0.42	0.58	0.83	0.42	0.46	0.42	0.75	0.09	0.67	0.51	0.68	0.45	0.77	0.53	0.27	0.54	0.47	0.8	0.86	0.78	0.33	0.67	0.76	0.46
XLOC_001645	0.39	0.39	0.27	0.47	0.16	0.44	0.31	0.23	5.98	7.17	6.32	8.69	13.32	14.87	10.93	9.52	6.09	7.3	5.82	6.18	4.61	5.73	4.95	5.66	5.55	6.58	6.24	5.79	4.59	4.98	4.13	5.26	6.32	8.96	6.49	6.94	5.64	4.98	8.76	6.23	6.33	5.79	3.87	5.55	4.12	5.17	4.51	3.81	5.61
XLOC_001646	0.76	0.68	4.87	5.1	1.25	3.45	4.6	1.74	1.18	0.8	2.62	3.22	1.2	3.3	3.34	1.36	0.72	0.88	2.57	2.46	0.85	1.99	2.01	1.74	1.65	1.55	4.36	2.56	1.17	2.41	1.96	1.45	3.53	1.89	4.18	3.73	0.41	3.19	3.57	1.19	3.36	2.32	7.57	6.3	1.21	4.64	5.24	3.09	1.2
XLOC_001647	2.44	2.5	2.88	3.26	3.44	4.64	5.23	3.26	2.53	2.37	2.6	2.12	1.28	2.05	1.56	1.77	3.23	1.34	4.43	4.32	2.21	4.11	3.08	3.85	1.37	0.96	3.02	2.47	1.33	3.17	2.32	3.07	2.13	1.9	2.22	3.49	3.5	2.07	2.32	4.44	2.07	1.99	3.99	2.71	4	3.5	4.03	4.79	2.61
XLOC_001648	0.1	0.17	0.57	0	0.05	0.04	0.32	0	0.72	0.75	0.33	0.29	1.49	0.28	0.22	0.83	0.15	0.18	1.35	0.14	0.31	0	0.08	0.21	0.08	0.32	1	0.51	0.46	0.26	0	0.06	0	0.37	0.78	0.1	0.76	0.05	0.97	1.06	0.52	0.08	1.41	0.05	0.29	0.12	0.54	0	0
XLOC_001649	2.89	2.53	1.77	2	2.33	2.09	2.15	1.97	0.94	0.93	1.55	1.24	1.35	1.29	1.14	1.32	1.77	2.03	2.04	1.88	1.33	1.61	1.44	1.71	1.39	1.04	1.17	1.54	0.7	1.5	0.64	0.73	1.73	1.44	1.15	0.78	0.67	1.07	0.92	0.9	2.26	2.25	1.63	1.89	1.34	2.39	1.7	2.39	1.74
XLOC_001650	0.83	0.39	0.72	0.21	0.72	0.82	0.02	0.57	0.77	0.44	0.57	0.38	0.62	0.35	0.09	0.38	0.38	0.17	0.67	0.18	0.67	0.32	0.04	0.26	0.41	0.1	0.65	0.52	0.46	0.2	0.01	0.58	0.46	0.23	0.67	0.19	0.92	0.69	0.3	0.43	0.76	0.21	0.35	0.34	0.48	0.33	0	0.29	0.29
XLOC_001651	4.32	4.2	4.8	3.95	5.41	5.75	5.34	5.57	3.43	3.61	3.66	2.98	3.48	2.28	2.72	3.41	2.97	2.8	3.71	2.63	4.18	3.45	3.58	3.63	3.91	3.89	3.35	2.67	6.65	3.2	4.46	4.18	3.52	3.57	3.77	2.1	4.42	3.36	3.11	4.74	3.6	3.38	3.09	2.57	5.72	3.66	3.15	3.98	2.78
XLOC_001652	0.45	0.5	0.21	0.49	0.16	0.25	0.34	0.25	0	0.15	0.17	0.02	0	0.05	0.29	0	0.16	0.09	0.08	0.08	0.19	0.05	0.1	0.07	0.28	0.09	0.35	0	0	0.05	0	0.05	0.18	0.09	0.15	0.04	0	0.17	0	0.19	0.25	0.2	0	0.06	0	0.3	0	0.03	0.05
XLOC_001653	0.96	1.24	0.63	1.26	0.63	1.51	0.94	0.73	1.88	2.53	1.56	1.8	1.16	1.35	1.31	1.8	0.83	1.29	1.13	1.62	0.98	1.97	1.14	1.58	0.93	0.92	0.77	1.44	0.84	1.12	0.66	0.74	0.77	1.29	1.15	0.89	1.91	3.5	2	1.66	1.08	0.72	0.52	0.94	0.73	1.61	0.42	1.41	1.01
XLOC_001654	0	0	0	0	0	0	0	0	0	0	0	0	0	0	0	0	0	0	0	0	0	0	0	0	0	0	0	0	0	0	0	0	0	0	0	0	0	0	0	0	0	0	0	0	0	0	0	0	0
XLOC_001655	0.11	0.33	0.16	0.68	0.27	0.09	0.65	0.14	0.48	0.31	0.11	0.4	0.93	0.61	0.78	0.28	0.13	0.19	0.05	0.37	0.69	0.2	0.3	0.23	0.18	0.12	0.3	0.11	0.37	0.48	0.46	0	0.2	0	0.15	0.48	0.33	0	0.94	0.37	0.18	0.38	0.27	0.76	0.58	0.07	0.26	0.04	0.24
XLOC_001656	18.25	16.77	19.85	14.9	20.96	14.53	16.24	17.01	12.94	14.09	14.47	14.02	13.37	11.58	11.63	13.16	11.22	11.76	14.88	12.04	12.78	12.78	14.57	13.38	12.72	12.34	16.58	12.68	14.61	13.98	16.37	17.19	12.37	11.2	15.37	12.74	12.24	11.19	13.27	15.74	12.22	12.52	16.53	13.45	14.27	13.01	14.6	13.78	11.53
XLOC_001657	0.22	0.35	0.27	0.21	0.24	0.27	0.31	0.53	0.13	0.21	0.16	0.26	0.22	0.25	0.15	0.23	0.07	0.19	0.14	0.43	0.12	0.16	0.3	0.19	0.08	0.12	0.09	0.22	0.22	0.36	0.14	0.21	0.11	0.31	0.06	0.31	0.12	0.02	0.18	0.05	0.16	0.27	0.14	0.17	0.22	0.07	0.2	0.18	0
XLOC_001658	5.9	5.8	7.06	8.53	11.18	13.51	14.25	11.31	10.37	9.74	13.08	11.75	11.1	11.99	9.55	12.91	16.17	21.36	22.77	22.36	19.93	24.48	21.02	21.06	11.82	9.51	12.43	17.27	10.7	15.86	17.38	13.56	13.15	11.97	8.28	8.09	8.1	7.99	8.63	6.53	20.32	17.74	19.02	20.44	15.63	21.11	15.68	22.08	17.67
XLOC_001659	0	0	0	0	0	0	0	0	0	0	0	0.11	0	0.04	0.15	0.04	0	0	0	0.07	0	0	0.05	0	0	0	0	0	0	0	0	0.08	0	0	0.19	0.07	0	0	0	0	0	0	0	0.03	0.04	0	0.55	0	0
XLOC_001660	0	0.1	0.23	0.06	0.28	0.03	0.45	0.19	0.35	0.43	1.05	0.21	0.25	0.32	1.04	0.72	0.03	0.05	0.43	0.28	0.06	0.09	0.11	0.18	0.02	0.1	0.42	0.22	0.57	0.74	1	0.85	1.23	1.47	2.11	1.38	1.19	3.87	1.6	1.55	0.31	0.33	0.44	0.34	0.17	0.38	0.7	0.46	0.2
XLOC_001661	0.68	0.62	0.73	0.62	0.82	0.38	0.84	0.64	0.5	1.04	0.89	0.71	0.98	1.25	0.98	0.98	0.56	0.3	0.5	0.35	0.64	0.47	0.29	0.6	0.47	0.84	0.85	0.39	0.32	0.76	0.13	1.43	0.68	0.87	1.29	1.25	0.56	1.42	0.69	0.67	0.5	0.63	0.66	0.56	0.31	0.52	0.83	0.97	0.21
XLOC_001662	0	0.18	0.03	0	0	0.04	0	0.04	0	0.14	0.07	0.19	0.1	0.6	0.2	0.05	0.14	0.06	0.04	0.3	0	0	0	0.11	0	0.1	0.07	0.32	0	0	0	0	0.16	0.1	0	0.17	0	0	0.1	0.15	0.19	0.14	0	0	0	0	0	0	0.1
XLOC_001663	197.9	388.31	375.17	158.56	1146.01	215.67	357.55	314.55	362.77	710.98	386.94	242.95	1017.74	271.34	294.29	367.11	265.86	465.17	371.32	219	1431.05	373.16	280.7	434.81	525.74	1024.92	556.77	349.09	2347.65	638.28	506.01	747.02	371.88	660.52	605.57	448.7	2292.36	323.65	431.43	1047.58	246.3	504.02	401.62	240.67	1364.81	342.71	207.1	471.27	306.43
XLOC_001664	0.63	0.92	0.96	0.82	0.97	0.8	0.88	0.84	0.57	0.49	0.44	0.51	0.83	0.89	0.58	0.72	0.47	0.6	0.34	0.62	0.57	0.66	0.5	0.4	0.54	0.35	0.58	0.42	0.39	0.66	0.21	0.44	0.6	0.79	0.27	0.86	0.28	0.82	0.71	0.65	0.81	0.62	0.95	0.8	0.58	0.57	0.99	0.46	0.38
XLOC_001665	0.84	1.1	1.12	0.63	0.66	0.86	0.59	1.02	0.42	0.1	0.56	0.46	0.26	0.36	0.26	0.28	0.4	0.34	0.28	0.31	0.47	0.48	0.51	0.61	0.45	0.55	0.2	0.33	0.32	0.02	0.04	0.51	0.32	0.18	0.37	0.23	0.14	0.37	0.37	0.45	0.48	0.7	0.47	0.22	0.64	0.77	0.27	0.32	0.36
XLOC_001666	0	0.09	0	0.11	0.07	0.18	0.26	0	0.04	0.22	0.15	0.19	0.11	0.04	0	0.12	0.7	0.5	0.43	0.61	0.44	0.68	2.06	1.32	0.08	0.38	0.28	0.36	0.39	0.17	0.15	1.07	0.41	0.67	0.39	0	0	0	0	0	0.5	0.61	0.31	1.24	0.37	0.38	0.57	0.14	0.79
XLOC_001667	25.46	25.92	29.57	27.58	23.69	25.46	25.66	26.92	30.5	30.13	29.62	34.32	33.09	34.16	31.78	29.36	28.99	28.91	37.87	30.9	35.96	35.1	36.33	32.61	25.85	25.29	30.36	26.33	32.91	34.37	48.22	40.35	24.81	27.13	37.98	30.95	33.06	27.48	35.35	28.09	28.29	29.7	39.31	39.48	33.51	40.95	46.43	45.93	28.73
XLOC_001668	0.04	0.03	0.17	0.1	0.16	0.66	0.33	0.07	0.14	0.04	0.13	0.02	0.02	0.43	0.09	0.05	0.09	0.17	0.04	0	0	0.2	0.1	0.07	0.05	0.02	0.27	0	0	0	0.22	0	0.23	0.12	0.49	0.04	0.17	0.29	0.14	0.05	0	0	0.11	0.37	0.12	0.1	0.3	0.16	0
XLOC_001669	1.81	2.05	1.51	1.71	1.77	1.56	1.13	0.7	0.42	0.57	1.31	0.88	0.9	1.39	1.4	0.84	0.5	0.31	0.73	0.91	0.46	1.05	0.4	0.06	0.28	0.36	0.85	0.26	0.27	0.26	0	0.04	1.31	1.18	0.54	0.85	0.31	1.27	0.67	0.16	0.44	1.42	0.57	0.84	0.77	0.74	0.54	0.1	0.33
XLOC_001670	0.81	1.32	1.13	1.27	0.72	1.6	1.31	1.36	1.17	1.08	1.86	1.38	1.26	1.22	1.23	1.54	1.68	1.74	2.64	1.78	1.5	1.87	2.17	2.01	1.1	1.09	1.15	1.73	1.55	1.29	1.79	1.46	1.25	2.41	2.02	1.76	1.31	1.84	2.01	1.02	1.97	2.59	1.57	2.49	2.07	1.84	2.42	2.69	1.69
XLOC_001671	0.65	1.46	0.88	1.02	0.89	2.22	1.35	1.5	0.67	1.17	0.8	1.34	0.61	1.54	0.71	1.24	0.51	1.31	0.63	0.74	0.48	0.87	0.46	0.82	0.56	0.97	0.82	0.55	0.63	0.58	0.65	0.62	0.71	1.05	0.9	1.2	0.63	1.15	0.89	1.12	0.82	1.03	0.5	0.8	0.67	0.91	0.59	0.88	0.58
XLOC_001672	0	0.14	0.41	0	0.05	0.23	0.34	0.09	0.55	0.36	0.49	0.22	0.37	0.92	0.14	0.24	0.97	1.12	0.58	0.76	1.14	1.02	0.83	1.03	0.85	0.6	0.53	0.63	0.33	0.66	0.34	0.67	0.95	0.31	0.44	0.72	0.09	0.16	0.61	0.18	0.92	1.38	1.88	1.32	0.19	1.17	0.32	1.67	0.59
XLOC_001673	1.24	0.7	0.8	0.77	1.41	0.56	0.72	1.27	0.27	0	0.37	0.03	0.04	0.29	0.04	0.49	0.05	0.09	0	0.44	0.06	0	0.05	0.33	0.22	0	0.47	0	0	0.19	0	0.08	0.89	0.39	0.3	0	0	0.13	0.38	0	0.04	0.11	0.22	0.46	0.15	0.7	0.62	0.62	0.22
XLOC_001674	3.42	3.77	3.16	3.87	4.57	4.21	5	4.06	3.14	3.06	2.79	2.14	2.46	2.02	2.73	2.23	3.03	2.32	3.26	2.59	3.58	2.65	3.92	3.52	4.01	1.93	2.36	2.73	2.64	1.87	4.9	3.55	2.31	2.18	2.69	2.57	2.64	4.91	4.11	3.18	3.61	3.55	4.11	3.77	3.77	3.26	3.87	3.37	2.5
XLOC_001675	0.22	0.3	0.31	0.1	0.3	0.6	0.28	0.27	0.26	0.32	0.25	0.42	0.28	0.07	0.29	0.13	0.3	0.28	0.71	0.68	0.24	0.69	0.35	0.3	0.27	0.17	0.47	0.57	0.49	0.26	0.23	0.43	0.06	0.16	0.37	0	0.11	0	0.15	0.1	0.12	0.36	1.32	0.66	0.28	0.05	0.68	0.65	0.3
XLOC_001676	0.93	0.96	0.27	0.56	1.34	0.99	1.2	0.63	2.27	2.78	1.62	1.64	2.27	2.1	1.66	1.93	2.06	1.75	2.15	1.91	2.57	3.19	3.39	2.66	1.56	1.65	1.96	1.84	2.55	2.87	2.17	1.81	1.34	1.86	1.63	1.71	1.55	3.73	2.85	2.89	1.71	1.49	0.7	1.98	1.65	0.59	2.89	2.07	2.52
XLOC_001677	7.56	6.34	5.84	9.22	8.12	8.91	6.17	6.82	2.82	3.79	3.98	4.68	2.43	2.97	1.74	2.93	2.97	2	3.39	5.12	2.27	2.92	2.59	3.04	2.81	2.88	2.64	3.28	2.44	2.09	1.85	1.2	3.44	1.59	2.43	1.86	2.76	3.52	2.67	3.45	2.04	2.3	1.57	1.94	1.99	1.9	2.92	1.87	3.84
XLOC_001678	0.07	0.32	0	0.37	0	0	0	0.12	0.16	0.53	0	0.14	0	0.04	0.15	0.04	0.05	0.24	0.21	0.2	0	0	0.16	0	0.08	0.04	0.04	0.28	0	0.16	0	0.17	0.25	0.25	0	0.26	0	0.07	0.16	0	0	0.22	0.34	0.31	0	0.04	0.09	0	0
XLOC_001679	1.34	1.59	1.3	1.09	1.16	0.85	0.85	0.97	0.9	1.02	0.65	0.55	0.57	0.67	0.78	0.52	0.88	0.78	0.75	0.89	0.81	0.56	0.57	0.7	0.88	1.14	0.75	0.79	0.71	0.71	0.43	0.6	0.74	1.06	0.89	0.58	0.66	0.73	0.85	0.64	0.27	0.83	0.65	0.38	0.49	0.73	0.78	0.86	0.94
XLOC_001680	3.39	3.86	2.73	2.95	3.82	3.8	2.54	2.99	1.55	1.38	1.53	1.56	1.41	1.61	1.28	1.6	1.59	1.01	1.8	1.57	1.75	1.54	2.02	2.1	1.1	1.31	1.48	2.19	0.94	1.48	1.55	1.73	1.95	1.46	1.27	2.02	1.76	1.51	1.77	2.21	2	1.85	1.44	1.98	1.86	2.2	1.82	2.35	1.97
XLOC_001681	0.03	0	0.01	0.07	0	0.01	0.08	0	0.07	0.36	0.4	0.47	0.58	0.62	0.23	0.24	0.01	0.15	0.18	0.42	0.27	0.26	0.21	0.22	0.01	0.35	0.21	0.38	0.11	0.1	0.15	0.02	0.08	0.1	0.15	0.34	0.17	0.14	0.3	0.07	0	0.08	0.3	0.27	0.02	0.11	0.15	0.02	0.02
XLOC_001682	1.14	1.48	2.81	3.87	3.44	0.98	0.44	1.43	0.8	1.05	0.49	2.54	3.7	1.3	0.33	1.26	0.82	1.56	0.31	1.9	1.18	0.64	0.13	0.54	0.7	0.62	1.11	1.61	1.2	0.44	0.13	0.75	0.92	1.46	0.6	2.46	1.08	1.12	0.6	0.8	0.66	1.22	0.36	1.4	1.75	0.56	0.06	0.54	0.86
XLOC_001683	0.35	0.52	1.53	2.33	1.41	0.41	0.13	0.59	0.2	0.21	0.16	0.92	1.03	0.34	0.14	0.29	0.38	0.35	0.15	0.57	0.22	0.1	0.04	0.2	0.39	0.31	0.36	0.52	0.54	0.11	0.01	0.26	0.3	0.44	0.09	1.17	0.34	0.42	0.18	0.32	0.09	0.3	0.09	0.61	0.6	0.14	0.03	0.26	0.2
XLOC_001684	0.54	1.06	1.1	1.4	1.36	0.75	1.1	0.54	3.12	3.36	2.62	3.42	5.35	3.81	3.5	1.71	2.14	4.14	1.71	2.75	1.47	2.32	1.65	0.81	2.4	3.31	2.71	2.22	2.66	2.2	1.49	0.93	2.31	3.29	1.84	2.05	1.62	1.87	2.86	0.8	2.05	3.09	2.14	2.31	2.71	1.91	1.8	0.51	2.59
XLOC_001685	0.5	0.67	0.44	0.62	0.64	0.41	0.57	0.82	0.32	0.25	0.31	0.28	0.7	0.38	0.39	0.29	0.24	0.22	0.12	0.17	0.34	0.17	0.27	0.23	0.08	0.11	0.1	0.24	0.14	0.13	0.06	0.12	0.14	0.2	0.05	0.2	0.07	0.09	0.34	0.08	0.14	0.23	0.24	0.64	0.37	0.23	0.3	0.31	0.21
XLOC_001686	4.1	4.41	3.92	3.44	4.06	4.7	3.73	4.85	1.88	2.56	1.26	2.07	3.12	2.8	3.46	2.57	1.75	1.97	1.7	2.18	1.92	1.72	2.01	1.28	2.65	2.27	2.43	1.18	1.6	1.87	2.66	2.29	4.07	3.2	1.81	2.19	2.21	2.7	2.59	2.1	3.06	2.12	2.44	3.03	2.03	3.99	6.55	3.49	1.68
XLOC_001687	0.38	0.77	0.66	0.55	0.53	0.43	0.49	0.97	0.28	0.5	0.28	0.28	0.12	0.23	0.16	0.07	0.19	0.31	0.35	0.15	0.31	0.38	0.25	0.4	0.21	0.4	0.28	0.46	0.39	0.11	0.15	0.52	0.34	0.47	0.35	0.68	0.14	0.33	0.51	0.64	0.16	0.24	0.19	0.32	0.13	0.15	0.26	0.11	0.07
XLOC_001688	0	0	0	0	0	0	0	0	0.12	0.07	0	0.04	0.07	0.27	0.11	0.08	0.05	0.19	0	0.07	0	0.16	0	0.12	0.04	0	0.34	0	0.04	0.89	0	0.04	0.1	0	0.13	0.13	0	0	0	0.31	0.07	0.19	0.19	0.1	0.12	0	0	0	0.08
XLOC_001689	3.09	3.07	2.59	2.64	3.19	2.54	2.43	3.05	3.04	2.75	3.09	2.61	3.15	3.84	3.62	3.78	2.16	2.07	3.53	3.98	2.53	3.58	3.21	2.65	1.2	1.18	2.55	2.62	1.9	2.38	1.23	2.76	3.25	2.59	3.31	2.59	1.59	1.96	2.54	2.53	2.61	2.57	3.92	4.43	3.16	4.87	4.88	5.72	2.08
XLOC_001690	7.41	9.18	5.04	8.04	5.63	8.64	6.4	6.88	3.05	2.91	2.25	1.88	1.06	1.94	1.01	1.52	8.09	5.71	4.58	6.98	3.71	4.76	3.22	3.72	7.44	5.3	2.32	3.86	1.64	3.57	2.68	2.6	5.25	5.08	2.27	2.73	1.42	3.64	2.94	2.54	9.91	7.04	4.07	5.7	3.77	6.05	4.53	4.66	8.52
XLOC_001691	0.28	0.05	0.46	0.13	0	0.1	0	1.13	0.35	0.5	0.21	0.02	0	0.43	0.37	0.44	0.06	0.26	0.36	0.58	0.25	0.92	0.73	0.61	0.07	0	0.34	0.25	0.2	0.83	0.49	1.29	0.72	0.32	0.6	0.23	0	0.49	0.23	1.62	0.37	0.26	1.52	0.82	0.42	1.32	1.19	0.86	0.45
XLOC_001692	13.32	12.48	11	9.52	10.82	10.87	11.62	8.85	19.51	18.57	17.75	16	13.14	12.49	16.31	14.14	32.14	24.64	23.85	27.94	25.05	22.57	25.33	20.78	36.28	27.23	22.53	27.35	29.81	21.46	31.72	20.14	20.82	18.01	17.49	16.85	23.71	19.26	24.63	17.83	30.36	17.38	14.76	15.74	21.14	15.53	15.77	15.78	32.53
XLOC_001693	0.05	0.05	0.15	0.02	0.05	0.11	0.32	0.15	0.01	0.08	0.64	0.16	0.16	0.2	0.37	0.17	0.1	0.12	0.44	0.22	0.22	0.09	0.79	0.43	0.07	0.03	0.37	0.18	0.1	0.18	0.35	0.1	0.06	0.1	0.26	0.1	0.03	0.08	0.43	0.13	0	0.03	0.45	0.09	0.14	0.12	0.71	0.1	0.1
XLOC_001694	0.57	0.54	0.53	0.4	0.3	0.24	0.24	0.4	0.58	0.71	0.45	0.61	1.2	1.39	1.04	0.62	0.45	0.45	0.31	0.26	0.39	0.46	0.25	0.58	0.6	0.65	0.44	0.26	0.36	0.27	0.09	0.45	0.8	0.87	0.41	0.66	0.41	0.73	0.46	0.26	0.61	1.01	0.49	0.4	0.58	0.57	0.55	0.55	0.51
XLOC_001695	0	0	0	0	0	0	0	0	0	0	0	0	0	0	0	0	0	0	0	0	0	0	0	0	0	0	0	0	0	0	0	0	0	0	0	0	0	0	0	0	0	0	0	0	0	0	0	0	0
XLOC_001696	1.51	2.61	2.07	2.45	1.13	2.12	2.04	1.85	0.74	0.7	0.74	0.61	0.53	0.97	0.61	0.87	0.61	0.69	0.81	1.08	0.89	0.99	0.7	1.15	0.43	0.31	0.59	0.77	0.72	0.99	0.57	1.26	0.42	0.43	1	1.23	0.36	1.37	0.85	1.09	0.75	0.56	1.22	1.17	0.6	1.05	0.67	1.25	0.57
XLOC_001697	0.1	0.07	0.35	0.21	0.45	0.25	0	0.12	0.21	0.12	0.59	0.14	0.6	0.37	0.07	0.13	0.23	0.23	0.53	0.22	0.24	0.24	0.18	0.17	0.07	0.07	0.53	0.44	0.37	0.27	0.3	0.22	0.09	0.41	0.64	0.25	0.42	0.07	0.15	0.59	0.27	0.09	1.11	0.2	0.19	0.35	0.09	0.2	0.22
XLOC_001698	0.09	1.04	0.87	0.19	0.12	0.13	0.19	0.11	0.04	0.19	0.05	0	0.05	0.02	0.07	0	0.07	0.13	0.09	0.12	0.14	0	0.02	0	0.1	0.26	0.08	0.05	0.43	0	0.13	0.06	0	0.18	0	0.06	0	0.03	0.03	0	0	0.08	0.22	0.05	0.02	0	0.12	0.02	0
XLOC_001699	2.07	1.79	1.41	2.43	2.34	1.51	1.66	2.11	1.03	0.84	1.05	0.56	0.69	0.72	0.5	0.37	1.02	1.51	1.39	0.98	1.25	0.71	0.67	1.18	2.61	0.67	1.28	1.65	1.62	1.23	1.85	1.17	1.57	2	1.69	1.92	1	0.93	0.49	0.6	1.72	1.63	1.31	1.95	0.69	1.47	1.12	1.98	1.85
XLOC_001700	5.34	4.27	4.97	4.95	4.91	5.36	3.93	5.23	0.02	0.01	0.07	0	0	0	0.02	0.01	0	0.02	0.03	0.04	0.03	0	0.02	0	0	0	0.02	0	0	0.07	0	0	0	0	0	0	0	0	0	0	0	0.01	0	0	0.03	0	0.01	0	0
XLOC_001701	0.76	0.86	0.43	0.66	0.74	0.48	0.59	0.46	0.14	0.25	0.14	0.08	0.17	0.47	0.2	0.23	0.21	0.09	0.04	0.15	0.07	0.15	0.32	0.07	0.09	0	0.29	0.06	0.15	0.14	0.17	0.05	0.14	0.24	0.07	0.23	0	0.16	0.14	0.18	0.22	0.24	0.36	0.24	0.24	0.02	0.35	0.27	0.22
XLOC_001702	0.01	0.18	0.16	0.06	0.14	0.09	0.11	0.06	1.49	1.51	1.08	1.08	1.08	1.03	1.56	0.86	2.4	1.81	0.84	1.7	1.26	1.52	0.76	1.32	2.7	2.88	1.74	2.52	0.73	1.34	0.63	0.64	3.15	2.35	1.24	1.7	0.8	1.41	1.19	1.31	2.98	2.25	0.84	1.75	1	1.08	0.89	0.91	1.74
XLOC_001703	0	0.32	0.58	0.38	0.28	0	0.09	0.08	0.36	0.15	0.35	0.28	0.28	0.13	0.37	0.14	0.07	0.34	0.58	0.51	0.26	0.29	0.23	0.61	0.13	0.16	0.38	0.4	0.09	0.68	0.41	0.15	0.21	0.25	0.36	0.37	0.04	0.39	0.44	0.48	0.24	0.39	0.21	0.75	0.59	0.23	0.52	0.39	0.43
XLOC_001704	0.46	1.03	0.71	0.78	0.19	0.74	1.52	0.7	1.32	1.18	1.13	1.26	0.82	0.82	1.72	1.53	0.87	1.74	0.53	0.9	0.6	0.96	0.84	0.9	1.07	0.65	0.37	0.76	0.12	0.39	0.6	0.28	1.29	0.93	0.31	0.19	0.11	0.41	1.15	0.67	0.98	1.12	0.85	0.27	0.23	0.92	0.49	0.22	0.67
XLOC_001705	0.05	0.14	0	0.75	0.26	0.5	0.63	0.33	0.12	0.03	0	0.03	0.03	0.3	0.12	0.06	0.12	0.19	0.05	0.21	0.24	0.19	0.21	0.05	0.06	0	0.3	0.25	0.46	0.25	0.09	0.52	0	0.04	0.2	0	0	0.16	0.18	0.24	0	0.23	0.21	0.16	0.06	0.06	0.25	0	0.18
XLOC_001706	0	0	0	0	0	0	0	0	0	0	0	0	0	0	0	0	0	0	0	0	0	0	0	0	0	0	0	0	0	0	0	0	0	0	0	0	0	0	0	0	0	0	0	0	0	0	0	0	0
XLOC_001707	0	0	0	0	0	0	0	0	0	0	0	0	0	0	0	0	0	0	0	0	0	0	0	0	0	0	0	0	0	0	0	0	0	0	0	0	0	0	0	0	0	0	0	0	0	0	0	0	0
XLOC_001708	0.37	0.52	1.26	0.73	0.53	0.41	0.75	0.51	1.73	1.74	1.99	2.49	3	3.27	2.27	2.61	0.74	1.1	2.18	1.31	1.49	1.78	1.71	2.15	0.89	0.82	1.74	1.16	1.3	1.57	1.9	1.97	0.7	0.97	1.89	1.17	1.08	1.13	1.96	1.32	0.69	0.82	1.92	1.44	1.56	1.05	1.25	2.18	0.91
XLOC_001709	0.08	0	0	0.06	0	0	0	0	0.18	0.08	0.53	0.12	0.3	0.18	0.99	0.05	0.96	0.17	0.47	0.15	0.28	0.57	0.06	0	0.7	0.86	0.44	0.65	0.19	0	0	0.38	0.4	0.4	0.44	0.46	1.14	0.16	1	0.35	0.17	0	0.04	0.2	0.19	0.28	0	0.42	0.09
XLOC_001710	5.69	6.33	4.91	6.17	4.85	7.75	7.13	5.91	4.14	4.69	4.59	5.08	4.67	5.42	4.87	5.52	4.2	4.29	4.91	5.07	5.03	5.47	5.82	6	3.89	3.85	4.21	5.06	4.39	5.42	6.24	4.97	4.02	4.02	4.23	4.84	3.85	5.64	5.15	5.15	4.97	5.25	4.77	5.21	5.54	5.71	4.88	5.91	4.06
XLOC_001711	0.33	0.86	0	0.12	0.48	0.03	0.16	1.21	0.34	0.86	0.02	0.04	0	0	0.14	0.71	0.18	0.27	0.1	0.06	0.04	0	0.16	0.72	0.42	0.64	0.08	0.13	0.1	0.01	0.02	0.71	0.18	0.64	0	0.02	0.35	0.08	0.02	0.75	0.31	0.73	0	0.16	0.26	0.01	0.15	0.68	0.13
XLOC_001712	2.18	2.15	1.3	1.67	2.28	2.62	3.37	1.9	4.27	4.89	3.47	3.6	4.48	3.82	5.2	4.9	3.53	3.21	2.87	3.93	5.26	5.78	5.97	5.39	3.13	4.92	3.01	4.69	5.34	5.67	7.8	3.64	4.21	3.39	3.78	4.06	5.57	5.86	6.74	7.11	3.46	3.69	2.78	3.8	4.63	3.97	4.96	3.28	3.62
XLOC_001713	0.67	0.8	0.59	0.66	0.39	0.79	0.61	0.76	1.27	1.32	1.17	0.86	0.97	0.77	0.81	1.04	0.91	0.92	1.2	1.01	1.01	1.08	0.71	1.01	0.72	0.76	0.86	0.92	1	0.9	0.93	0.35	1.07	0.73	0.6	0.6	0.42	0.89	0.57	1.06	0.69	0.58	0.73	0.61	0.59	0.46	0.57	0.69	1
XLOC_001714	7.56	11.37	9.83	9.55	10.04	7.15	9.5	11.39	4.86	5.02	5.25	6.65	5.49	5.19	6.09	5	4.57	6.51	6.6	7	8.48	4.48	8.46	6.67	4.44	3.65	6.08	6.1	6.33	6.35	7.82	6.23	4.55	3.85	4.75	3.55	5.46	4.88	5.46	5.73	6.13	6.92	8.77	6.16	6.59	5.1	5.79	5.41	3.82
XLOC_001715	3.16	9.12	16.19	10.56	3.93	11.97	10.24	8.68	5.92	10.6	14.03	11.67	6.61	19.35	14.78	8.37	8.82	12.77	20.18	16.44	9.78	15.41	15.81	10.27	7.73	14.43	17.97	14.88	7.63	14.91	18.12	14.03	7.65	13.38	31.26	17.43	11.03	15.71	20.82	12.47	5.99	9.57	17.27	14.46	7.32	16.02	17.2	9.71	7.37
XLOC_001716	0	0	0.1	0.43	0	0	0	0	0	0	0	0.29	0	0	0	0	0	0	0	0	0	0	0	0.06	0	0	0	0	0.04	0	0	0	0	0	0	0.07	0.06	0.07	0	0	0.04	0.04	0	0	0	0.04	0	0	0
XLOC_001717	0	0.04	0.09	0.08	0	0.02	0.08	0.09	0.08	0.07	0.14	0.09	0.09	0.25	0.28	0.21	0.03	0.06	0.11	0	0	0.1	0.1	0.18	0.05	0.01	0.01	0.1	0.57	0.03	0	0.22	0.08	0.19	0.16	0.02	0.15	0.18	0.2	0	0.04	0	0.02	0.02	0.01	0	0	0.04	0.02
XLOC_001718	0.14	0.18	0.13	0.02	0.03	0.15	0.19	0.03	0	0.03	0.02	0.02	0.14	0	0	0.02	0.09	0.02	0.03	0.03	0.24	0	0.09	0.05	0.19	0.02	0.11	0.11	0	0.19	0.09	0.07	0	0.09	0.03	0.09	0	0.36	0.03	0.07	0.03	0.1	0.03	0.01	0	0.19	0	0.29	0.07
XLOC_001719	1.83	4.71	4.72	3.58	1.88	3.69	4.91	4.98	2.17	4.62	4.64	6.02	2.54	5.56	4.51	4.43	2.72	4.09	4.79	7.09	3.06	4.51	5.57	5.32	3.02	4.2	5.39	6.14	3.82	4.31	5.59	6.64	2.32	4.96	9.4	7.7	4.11	5.86	7.39	8.41	2.61	3.83	4.37	5.73	3.23	6.1	5.51	6.21	2.64
XLOC_001720	1.14	1.14	1.33	1.47	1.48	1.61	1.48	1.89	0.5	0.6	0.92	0.83	0.87	0.69	0.57	0.76	0.41	0.37	0.49	0.5	0.26	0.31	0.37	0.34	0.5	0.44	0.47	0.67	0.47	0.26	0.27	0.53	0.35	0.66	1.13	1.41	1.1	1.1	0.81	1.05	0.38	0.34	0.57	0.67	0.57	0.26	0.46	0.81	0.43
XLOC_001721	9.78	6.4	5.69	6.26	4.31	3.9	5.09	4.14	7.79	7.9	8.22	9.07	3.14	4.06	6.24	3.77	6.71	3.77	5.05	8.41	3.95	4.34	6.85	5.37	7.97	7.99	6.52	9.25	5.28	6.01	9.13	8.36	6.35	6.75	7.89	8.63	6.65	5.67	7.45	7.53	8.1	7.48	8.36	9.8	6.04	6.12	7.93	5.36	8.12
XLOC_001722	0.08	0	0.11	0.06	0.38	0.13	0.07	0.14	0.45	0.33	0.72	0.7	0.25	0.22	0.9	0.45	1.01	0.72	1.17	0.83	0.28	0.47	0.86	0.53	0.13	0.17	0.26	0.64	0.24	0.28	0.17	0.62	0.11	0.23	0.22	0.53	0	0.4	0.9	0.7	0.17	0.25	0.04	0.51	0	0.33	0	0.16	0.7
XLOC_001723	0	0.41	0	0.07	0	0.07	0.39	0.34	0.1	0.2	0	0.02	0.12	0.15	0.14	0.37	0.07	0.21	0.13	0.13	0.12	0.99	0.82	0.55	0.02	0.64	0.07	0.04	0.08	1.2	0.6	0.42	0.06	0.35	0.08	0	0	1.42	0.3	1.02	0.36	0.12	0.05	0.04	0.28	0.57	0.29	0.58	0
XLOC_001724	0.85	0.72	1.13	1.02	0.85	0.67	0.5	0.85	0.67	0.61	0.68	0.64	0.86	0.84	0.52	0.83	0.65	0.96	0.78	0.81	0.69	0.72	0.79	0.63	0.54	0.67	0.62	0.6	0.54	0.41	0.34	0.68	0.68	0.76	0.82	0.66	0.75	1.13	0.76	0.42	0.51	0.82	0.73	1	0.63	0.77	0.94	0.54	0.65
XLOC_001725	0.07	0.18	0.07	0.16	0.2	0.34	0.15	0	0.5	0.89	0.24	0.91	0.77	1.1	0.92	0.8	0.18	0.17	0.1	0.19	0.03	0.16	0.05	0.14	0.39	0.02	0.17	0.22	0.31	0.18	0.39	0	0.46	0.44	0.19	0.52	0.57	0.51	0.5	0.22	0.13	0.33	0	0.17	0	0.14	0	0.13	0.04
XLOC_001726	0.7	1.05	0.8	0.32	1.27	1.18	1.15	0.78	0.63	0.5	0.92	0.31	0.48	0.83	0.41	0.66	0.57	0.79	0.86	0.43	0.9	1.16	0.91	0.22	0.29	0.08	0.79	0.61	0.34	0.62	1.23	0.27	0.32	0.33	0.34	0.47	0.25	1.41	0.51	0.17	0.85	0.81	0.93	0.72	0.83	1.24	1.23	0.67	1.16
XLOC_001727	19.01	21.84	15.04	20.8	15.22	21	15.39	16.57	6.53	6.97	7.85	10.28	13.84	14.98	11.6	11.46	10.66	11.83	8.82	8.54	5.47	7.93	7.05	7.26	9.7	8.71	5.31	6.75	5.54	4.8	6.11	5.01	9.48	8.89	7.35	8	5.72	7.75	9.52	5.44	12.89	12.29	7.78	8.62	6.73	9.24	8.95	8.26	9.14
XLOC_001728	0.79	0.82	0.95	0.33	0.22	0.63	0.36	0.15	0.61	0.5	0.26	0.34	0.14	0.71	0.36	0.33	0.28	0.26	0.6	0.33	0.13	0.34	0.13	0.14	0.22	0.46	0.6	0.1	0.16	0.35	0	0.33	0.49	0.71	0.76	0.55	0.05	0.15	0.26	0.22	0.26	0.45	0.55	0.21	0.02	0.3	0.46	0.23	0.25
XLOC_001729	0.78	0.57	0.54	0.28	0.35	0.43	0.37	0.5	2.25	1.93	1.7	0.95	0.89	0.82	1.24	0.72	0.95	0.53	1.25	0.78	0.74	0.9	1.2	0.77	0.71	0.54	1.09	1.02	0.71	0.79	1.44	0.68	0.92	0.7	1.41	0.79	1.52	1.36	1.33	0.57	0.62	0.36	0.62	0.39	0.53	0.32	0.78	0.62	0.82
XLOC_001730	0.24	0.08	0.14	0.1	0.24	0.28	0	0.07	0.07	0.06	0.15	0.3	0.17	0.02	0.07	0.16	0.09	0.06	0.04	0.16	0	0.05	0.13	0.07	0.09	0	0.02	0.13	0.3	0.05	0	0	0.03	0.12	0.15	0.16	0.1	0.08	0	0	0.07	0.11	0.05	0.06	0	0.07	0	0.05	0.09
XLOC_001731	0.33	0.3	0	0.22	0.38	0.05	0.2	0.15	0.16	0.2	0.06	0.32	0.21	0.57	0.03	0.13	0.3	0.12	0.06	0.11	0.15	0	0.27	0	0.09	0	0.03	0	0.03	0.17	0	0.14	0.04	0.04	0.1	0	0.05	0	0	0	0	0.06	0.09	0.06	0.1	0.07	0.08	0.42	0
XLOC_001732	1.46	1.33	2.39	1.52	2.07	2.21	1.86	2.78	1.94	1.57	1.72	1.1	0.94	0.97	1.09	1.91	1.2	1.36	1.85	1.42	1.19	2.27	1.82	2.76	1.85	2.35	3.14	2.18	1.91	2.01	3.21	2.96	1.35	0.69	1.1	1.01	0.63	1.64	1.2	1.62	1.25	1.7	2.79	2.3	1.51	2.44	1.76	2.21	1.21
XLOC_001733	0.06	0.04	0.15	0.12	0.09	0.4	0.23	0.11	0.02	0.03	0.05	0.11	0	0	0.02	0.04	0.05	0.04	0	0.06	0.08	0.19	0.37	0.13	0.05	0	0.22	0.06	0.1	0.2	0.1	0.04	0.09	0	0.17	0.03	0.13	0	0.46	0.07	0.34	0.08	0.19	0.65	0.13	0.33	0.29	0.23	0.14
XLOC_001734	0.08	0.56	0.54	0.23	0.33	0.17	0.32	0.45	0.88	0.58	0.57	0.42	0.41	0.68	0.77	0.52	0.32	0.22	0.42	0.29	0.28	0.17	0.45	0.45	0.44	0.52	0.56	0.23	0.34	0.52	0.31	0.43	0.65	0.71	1.23	1.34	1.2	2.32	0.73	1.48	0.28	0.39	0.31	0.37	0.58	0.43	0.27	0.27	0.62
XLOC_001735	2.28	2.1	1.67	2.79	1.64	3.33	2.77	2.13	0.43	0.4	0.31	0.38	0.47	0.89	0.41	0.52	0.44	0.64	0.29	0.51	0.52	0.52	0.35	0.73	0.44	0.35	0.45	0.34	0.26	0.7	0.34	0.26	0.41	0.63	0.5	0.35	0.22	0.5	0.29	0.29	0.69	0.6	0.91	0.43	0.73	0.77	0.32	0.82	0.3
XLOC_001736	13.74	15.05	14.54	13.73	15.83	17.7	16.72	15.67	1.64	1.6	1.88	1.83	2.99	3.1	2.15	2.48	3.77	6.06	4.34	4.14	3.82	4.36	3.45	3.8	3.02	3.12	2.84	2.3	3.06	2.66	3.6	2.48	2.64	2.28	1.76	1.2	1.26	1.91	2.44	1.52	5.3	4.72	4.61	4.63	4.26	5.71	4.18	4.92	4.24
XLOC_001737	2.4	2.45	2.92	4.31	2	2.26	4.42	3.32	1.54	1.84	2.23	2.6	1.23	0.87	2.27	1.98	1.1	1.31	1.96	2.79	1.67	1.31	3.11	2.7	1.07	2.34	1.95	2.89	1.83	1.35	3.82	2.78	1.15	2.26	2.76	3.66	1.85	1.47	3.16	2.25	1.39	1.86	2.83	3.96	2.37	1.36	4.81	3.74	1.24
XLOC_001738	4.15	4.03	3.2	3.23	4.55	4.51	4.41	3.72	7.03	6.09	4.29	5.06	5.35	6.09	5.21	5.48	6.17	5.01	4.52	3.8	4.44	4.63	4.27	3.51	6.49	3.9	2.87	3.52	4.12	4.2	3.98	3.51	4.8	4.14	3.97	3.28	5.36	4.88	4.36	5.09	6.22	3.87	2.89	3.38	3.46	4.04	4.04	4.08	5.92
XLOC_001739	0.34	0.56	0.23	0.8	0.84	0.41	0.39	0.6	0.85	1.21	0.7	0.59	0.61	0.38	0.74	0.53	0.4	0.56	0.77	0.83	0.83	0.9	1.3	0.92	0.49	0.8	0.93	0.54	0.64	0.56	0.88	1.17	0.5	1.03	0.48	0.2	0.89	1.37	1.22	0.78	0.48	0.71	1.06	0.6	1.16	0.57	0.96	0.99	0.35
XLOC_001740	0	0	0	0	0	0.03	0	0	0.17	0.4	0.04	0.38	0.43	0.29	0.14	0.48	0.14	0.33	0.29	0.21	0.23	0.13	0.03	0.18	0.55	0.24	0.42	0.13	0.07	0.13	0.12	0.18	0.23	0.48	0.1	0.56	0.31	0.11	0.08	0.28	0.38	0.37	0.28	0.38	0.26	0.09	0.32	0.42	0.33
XLOC_001741	0.28	0.35	0.1	0.06	0.08	0.05	0.05	0.04	0.61	0.46	0.46	0.42	0.31	0.32	0.4	0.3	0.71	0.5	0.58	0.74	0.37	0.3	0.11	0.17	1.02	0.9	0.51	0.72	0.63	0.19	0.16	0.41	0.86	0.69	0.43	0.54	0.62	0.06	0.42	0.5	1.09	0.96	0.48	0.56	0.59	0.29	0.61	0.22	0.9
XLOC_001742	0	0.23	0.09	0.1	0	0.07	0.04	0.19	0	0.16	0.04	0.11	0	0.05	0.14	0.17	0.07	0.12	0.09	0.04	0.11	0.26	0.17	0.11	0.12	0.07	0.07	0.04	0.26	0	0	0.03	0.18	0	0.12	0	0	0.17	0.1	0.1	0.07	0.23	0	0.02	0.3	0.1	0.14	0.06	0.14
XLOC_001743	0.39	0.26	0.28	0.46	0.19	0.84	0.06	0.52	0.3	0.2	0.03	0.31	0.07	0.33	0.18	0.26	0.15	0	0	0.19	0.12	0.08	0.1	0.33	0	0.28	0	0.1	0.08	0.12	0	0.52	0.61	0.05	0.3	0.13	0	0.67	0.15	0.22	0.43	0.5	0.44	0.36	0.19	0.23	0.4	0.61	0.07
XLOC_001744	0.58	0.7	0.43	1.11	0.53	0.74	0.2	0.58	1.15	2.25	0.79	1.67	0.7	1.37	0.7	1.17	0.75	0.5	0.62	0.83	0.76	0.84	0.85	1.26	0.29	0.51	0.55	0.63	0.46	0.76	0.79	0.44	0.53	0.96	0.61	1.34	0.77	1.48	1.52	1.19	1.02	0.57	0.23	0.41	0.34	0.79	0.32	0.2	0.16
XLOC_001745	96.65	93.29	96.44	146.95	147.95	152.06	198.51	152.82	72.72	96.8	94.85	114.49	53.96	59.59	71.41	95.63	82.79	93.19	96.54	131.69	89.61	124.34	153.2	150.19	119.91	188.67	151.81	186.89	207.77	195.55	232.73	247	102.04	150.77	173.48	238.18	163.12	210.73	161.17	314.32	93.4	101.07	110.4	138.75	137.22	144.57	169.76	191.27	84.99
XLOC_001746	0.04	0.18	0.03	0.21	0.27	0.37	0.18	0.24	0.02	0.14	0.16	0.1	0.17	0.22	0.04	0.09	0.15	0.28	0.12	0.08	0.11	0	0.12	0.5	0.02	0.04	0.15	0	0.31	0.07	0.1	0	0.14	0.4	0	0.04	0.2	0.08	0.45	0.13	0.06	0.25	0.11	0.04	0.05	0.02	0.26	0	0.13
XLOC_001747	0.16	0.22	0.23	0.32	0	0.14	0.15	0.07	0	0.09	0.04	0.04	0.26	0	0.18	0	0	0	0.49	0	0	0.2	0	0	0.05	0	0.14	0.13	1.01	0.05	0	0	0.06	0	0.08	0	0.14	0	0	0.46	0.22	0	0	0.08	0.05	0.15	0	0.06	0.18
XLOC_001748	0	0.04	0	0	0.05	0.05	0	0	0.03	0.26	0.14	0.72	0.53	0.49	0.18	0.38	0	0.08	0	0	0.05	0	0	0.09	0	0.03	0.03	0	0	0	0.06	0	0.04	0	0	0	0	0.06	0	0	0	0.03	0.3	0	0.03	0	0.04	0	0
XLOC_001749	0.28	0.48	0.38	0.31	0.07	0.31	0.03	0.13	0.25	0.06	0.09	0.32	0.06	0.12	0.2	0.21	0.08	0.18	0.32	0.17	0.03	0.04	0.03	0.09	0.18	0.04	0.14	0.24	0.15	0.15	0.08	0.07	0.28	0.18	0.5	0.62	0.27	0.4	0.16	0.28	0.22	0.25	0.38	0.05	0.27	0.06	0.02	0.1	0.2
[truncated: 8,155 more rows]
[truncated: 16 more columns]
