# Supplementary material for: Annotation and cluster analysis of spatiotemporal- and sex-related lncRNA expression in rhesus macaque brain
Source: HighWire-hosted journal article supplement (doi:10.1101/gr.217463.116), 2017-07-07
Supplement: Supplemental_Material.tar.gz [file DElnc_WGCNA_module_eigengenes.xlsx]

## Sheet: DElnc_WGCNA_module_eigengenes
Sample	MEturquoise	MEred	MEbrown	MEsalmon	MEmagenta	MEtan	MEgrey60	MEpink	MEpurple	MEblack	MEgreen	MEgreenyellow	MElightgreen	MEyellow	MEblue	MElightcyan	MEcyan	MEmidnightblue	MEgrey
CB_01F	0.292362	-0.116727	-0.135424	-0.0592499	-0.124467	-0.112895	-0.0618318	-0.0980546	-0.0473304	-0.159899	-0.185939	-0.0351495	-0.0771793	-0.0932792	-0.101789	-0.174157	-0.0510825	-0.0382647	-0.0597937
CB_01M	0.333898	-0.116948	-0.134971	0.124031	-0.11126	-0.0996794	-0.048869	-0.059871	-0.0746705	-0.150397	-0.197289	-0.0438025	-0.0380273	-0.0978625	-0.108346	-0.152979	-0.0403641	-0.0426628	0.0713491
CB_04F	0.301623	-0.126026	-0.144488	-0.0636856	-0.111884	-0.126935	-0.0498707	0.0728057	0.0106035	-0.161369	-0.172037	-0.0692004	-0.0837872	-0.0763943	-0.101718	-0.168934	-0.0617404	-0.0254905	0.0804441
CB_04M	0.355609	-0.123779	-0.143084	-0.0252326	-0.131305	-0.108024	-0.0407404	-0.036719	-0.0219242	-0.159944	-0.179873	-0.0560808	-0.0223283	-0.0817531	-0.103339	-0.1832	-0.0550174	0.0019985	0.0548287
CB_10F	0.293858	-0.135326	-0.143334	-0.0610617	-0.143006	-0.161201	-0.0531718	-0.0753132	-0.0793183	-0.161329	-0.176353	-0.0451448	-0.0428899	-0.0821572	-0.113865	-0.137147	-0.0244537	-0.0258139	-0.0933445
CB_10M	0.339274	-0.131305	-0.149676	-0.074591	-0.138694	-0.154528	-0.05767	-0.0693473	-0.0436146	-0.155503	-0.166257	0.203801	-0.0362052	-0.0746912	-0.118071	-0.110303	-0.0411493	-0.0545395	0.0213443
CB_20F	0.34342	-0.126231	-0.142453	-0.0821691	-0.131788	-0.149638	-0.0562824	-0.0740476	-0.0231924	-0.132717	-0.183704	-0.0683584	0.153643	-0.0851192	-0.110818	-0.118932	-0.0462571	-0.039841	0.0707129
CB_20M	0.355416	-0.126324	-0.145978	-0.096177	-0.138408	-0.141464	-0.0587942	-0.0705974	-0.0419389	-0.14495	-0.173576	-0.0296737	-0.0755052	-0.0653042	-0.104264	-0.109622	-0.046869	-0.0518561	0.17523
DG_01F	-0.0471896	-0.084153	-0.0943327	-0.020063	-0.041442	0.139621	-0.021995	-0.0427187	-0.0316329	-0.123897	-0.14416	-0.00770793	-0.0851083	0.0156203	0.196083	0.0582496	-0.018203	-0.024825	-0.154702
DG_01M	-0.0498219	-0.103802	-0.0952782	0.246392	-0.0483736	0.0980618	0.00583487	-0.0264197	-0.0655846	-0.137966	-0.169812	-0.0543565	0.00071118	0.0255863	0.18239	0.079465	-0.0123926	-0.0188375	0.0245334
DG_04F	-0.0587063	-0.0861745	-0.0423589	0.0022522	-0.0771751	0.00617904	0.0355926	0.246628	-0.00626402	-0.0522573	-0.0801362	-0.060159	0.00281656	0.0901244	0.183676	0.133199	-0.0136462	-0.0220322	0.0522813
DG_04M	-0.0477026	-0.0976005	-0.10002	-0.0116849	-0.088628	0.054421	-0.0111661	-0.0266092	-0.0615857	-0.128283	-0.145233	-0.0315978	0.0102907	0.017536	0.271869	0.103757	-0.029866	-0.0222701	0.000676347
DG_10F	-0.0308562	-0.09854	-0.116656	-0.0370224	-0.0458341	0.0629595	-0.0133236	-0.0319614	-0.0276954	-0.147677	-0.16231	-0.0493006	-0.0286805	-0.0205677	0.432863	0.110501	0.00937345	0.0217717	-0.143805
DG_10M	-0.0124621	-0.0947226	-0.128957	-0.0292037	-0.0620101	0.0430341	-0.00796774	-0.0382464	-0.0517988	-0.146647	-0.164565	0.398018	-0.0222849	-0.000647818	0.425051	0.102603	-0.0316141	-0.0236905	-0.0274739
DG_20F	-0.0326731	-0.0960009	-0.119858	-0.040458	-0.0398196	0.0926748	-0.00937049	-0.0514272	-0.0273736	-0.132231	-0.164058	-0.0452299	0.292608	0.101059	0.309807	0.104121	0.00632974	-0.0162167	0.0216574
DG_20M	-0.0364288	-0.099019	-0.117486	-0.0543755	-0.089814	0.00491605	-0.028334	-0.0391993	-0.044707	-0.126876	-0.147821	-0.00820662	-0.0501453	0.0797806	0.300576	0.10466	-0.0357054	-0.0221905	0.142704
PFC_01F	-0.0564253	0.0619943	0.338017	0.291534	0.192945	0.0945804	-0.00360257	-0.0541752	-0.044687	0.025966	-0.00340078	-0.0715209	-0.0345529	-0.0938421	-0.0151018	-0.0785056	-0.0387238	-0.0201774	0.00439613
PFC_01M	-0.0706517	0.0829756	0.325411	-0.025332	0.0683258	0.161118	-0.0363551	-0.0448021	-0.0494335	0.0480237	-0.0181694	-0.0494647	-0.090065	-0.079125	-0.0215829	-0.0584841	-0.00720927	0.0045481	-0.185982
PFC_04F	-0.0595546	0.0210619	0.113406	-0.0244787	0.0337196	-0.0121423	0.00274265	0.230081	-0.0101747	0.182259	0.082624	-0.0600561	-0.0588262	-0.061547	-0.0627167	0.0537363	-0.0486885	-0.0042141	0.00793626
PFC_04M	-0.0630667	0.0189991	0.099668	0.00497786	0.00495257	-0.0455227	0.0430051	0.0114324	-0.0275006	0.196358	0.0553071	-0.063079	-0.0316144	-0.0700302	-0.0529526	0.0589274	-0.0190437	-0.00507041	-0.0158025
PFC_10F	-0.0620318	0.0055855	0.0613192	-0.0559311	-0.0276118	-0.103363	-0.0120623	-0.0471682	-0.00597423	0.245855	0.0801803	-0.0582237	-0.00519825	-0.0583545	-0.060457	0.118229	0.062062	0.0294751	-0.195979
PFC_10M	-0.0543188	-0.0193654	0.0173683	-0.107319	-0.0266417	-0.0476211	-0.0044568	-0.0150507	-0.00787522	0.21421	0.0879272	0.270041	-0.0688525	-0.0531902	-0.0623626	0.0987302	-0.0124057	0.0231609	-0.0248204
PFC_20F	-0.0572203	-0.0405223	0.0339173	-0.0586495	-0.0515937	-0.0968677	0.00776221	-0.0281743	-0.0111565	0.223585	0.0683389	-0.0598987	0.301692	-0.0490429	-0.0484809	0.184804	0.00315817	0.0221099	-0.0101811
PFC_20M	-0.0455939	-0.00916772	0.0440609	-0.0723524	0.00128374	-0.0634932	0.00202611	-0.0246512	-0.0155089	0.237373	0.112866	-0.029826	-0.0511253	-0.0470023	-0.0416469	0.114772	-0.0239248	-1.36069e-05	0.134667
PCC_01F	-0.0650778	0.102998	0.20817	0.0426659	0.182699	0.167019	-0.00184389	-0.0454694	-0.0488748	0.0349207	-0.0224009	-0.0244182	-0.0708686	-0.0615502	-0.0361844	-0.105218	-0.0149384	0.00431865	-0.346858
PCC_01M	-0.0670749	0.055135	0.17187	0.618667	0.323611	0.14989	-0.0397815	-0.0253017	-0.0557783	-0.013072	-0.0181655	-0.0736436	-0.0215939	-0.0830122	-0.0208412	-0.139307	-0.0444524	-0.0357236	0.00612945
PCC_04F	-0.0510197	-0.0201998	0.0181134	-0.0113369	0.0307111	-0.0271479	0.0521483	0.768734	0.0235518	0.122876	0.0643589	-0.030054	-0.0776363	-0.0255512	-0.0341559	0.0225841	-0.0150162	0.0106516	0.00804947
PCC_04M	-0.0637048	-0.0181504	0.0332676	-0.0104521	-0.0239022	0.00298212	0.967672	0.0523438	-0.0199789	0.13867	0.0307705	-0.0718038	-0.0241849	-0.0591719	-0.0398871	0.0791594	-0.0232042	-0.0194556	-0.0223948
PCC_10F	-0.0617555	-0.0566648	-0.0140232	-0.0343664	-0.0646675	-0.107953	-0.0349535	-0.0358581	-0.0559374	0.123524	0.0515288	-0.0591148	-0.0201402	-0.0362971	-0.0594912	0.153089	0.0291988	0.978135	-0.117683
PCC_10M	-0.0474721	-0.0444407	-0.0257225	-0.0576759	0.0454867	-0.0461036	-0.0075546	0.0129418	-0.050048	0.127585	0.0537339	0.422472	-0.0516627	-0.0221782	-0.0524529	0.0161245	-0.0163016	0.018827	-0.0546155
PCC_20F	-0.0750814	-0.0583408	-0.0389067	-0.0496392	-0.0920855	-0.107014	-0.0407246	-0.0478611	-0.0114368	0.0933528	0.078803	-0.0621295	0.221782	-0.00565605	-0.0849429	0.13602	-0.0412773	-0.0419959	0.0986098
PCC_20M	-0.0561338	-0.0418882	-0.0456456	-0.0731588	-0.0385798	-0.0725302	-0.00959567	-0.0223356	-0.0283721	0.120862	0.0807057	-0.0557258	-0.102913	-0.000909714	-0.0718593	0.00770904	-0.01613	0.0119196	0.266142
CA1_01F	-0.0487509	0.114928	0.0792755	0.00953299	0.37128	0.618364	-0.0178991	-0.0652045	-0.060313	-0.0620106	-0.0212753	0.0140291	-0.0813584	0.076422	-0.00303534	-0.251254	-0.0264011	-0.0381303	-0.125317
CA1_01M	-0.0358995	0.0354002	0.0902907	0.334031	0.468358	0.284397	0.0020241	-0.00397075	-0.0340215	-0.0659711	-0.0397209	-0.0409251	-0.00326267	0.0787882	0.0142202	-0.186322	0.00434915	-0.0286804	0.0688225
CA1_04F	-0.0394625	-0.0786158	-0.0670776	0.00488679	-0.0462902	0.0188245	0.0255251	0.23867	-0.0183774	-0.0784574	-0.039784	-0.0158097	-0.0689133	0.39004	0.0499274	0.0608206	-0.0400898	-0.00348603	0.0564427
CA1_04M	-0.0456341	-0.0820958	-0.0876846	-0.0175554	-0.0493226	0.21746	0.0319073	-0.0338713	-0.0364424	-0.0941953	-0.0999199	-0.0230535	-0.04861	0.302086	0.106961	0.0109565	-0.0509373	-0.0387839	0.0120133
CA1_10F	-0.0571206	-0.115835	-0.0891454	-0.0470168	-0.122621	0.0302516	0.00177495	-0.0407074	-0.0745503	-0.14553	-0.130953	-0.0532333	-0.0366421	0.200215	0.0945478	0.199766	0.0551745	-0.020804	-0.290418
CA1_10M	-0.0269129	-0.091385	-0.0658783	-0.00871847	-0.0595976	0.0701131	-0.0298986	-0.0407137	-0.0579048	-0.109182	-0.0835962	0.400081	0.0207196	0.477163	0.0653533	0.0803504	0.00516995	-0.0235945	-0.0549026
CA1_20F	-0.0434187	-0.100242	-0.0828457	-0.0227391	-0.0741362	0.0588141	-0.0195056	0.000677704	-0.047581	-0.104914	-0.125162	-0.0190203	0.475095	0.237996	0.139736	0.19483	-0.0208256	-0.0222822	0.0255796
CA1_20M	-0.0476401	-0.118691	-0.0937371	-0.0377024	-0.100901	0.0800472	-0.0389321	0.0276191	-0.0641208	-0.0996611	-0.111599	-0.0327466	-0.0533547	0.46392	0.0822761	0.185235	0.0251368	-0.015126	0.158541
OC_01F	-0.0295813	0.560638	0.0335086	-0.0297689	0.169237	0.0924673	-0.0555717	-0.104513	0.0373511	-0.0692306	0.0413072	-0.0270414	-0.0518329	-0.0850766	-0.0697457	-0.216324	-0.0368308	-0.0312185	-0.16017
OC_01M	-0.0261596	0.466042	0.0245628	0.203253	0.250441	0.0261758	-0.0568106	-0.0816876	0.0632181	-0.0963725	0.0792179	-0.0624792	0.00120461	-0.0928512	-0.0580859	-0.261734	-0.0173764	-0.0367034	0.0284724
OC_04F	-0.00445327	0.13753	-0.0784289	-0.0165596	0.0355564	-0.0756819	-0.0489847	0.173927	0.89338	-0.0464706	0.210685	-0.0795877	-0.0407054	-0.0395367	-0.0837417	-0.103329	-0.0482306	-0.0346997	0.0860536
OC_04M	-0.0125516	0.13463	-0.0641412	-0.00377896	0.0403105	-0.0682444	-0.0226458	-0.0349174	0.0975688	-0.0378082	0.277724	-0.0378159	-0.0389298	-0.0179562	-0.0756115	-0.122579	-0.0516195	-0.024213	0.0317561
OC_10F	-0.0176517	0.128809	-0.0716711	-0.0478799	-0.037951	-0.0829547	-0.00757804	-0.0735831	0.095168	-0.0712691	0.226151	-0.0437787	-0.0223035	-0.0541344	-0.0783969	-0.0776737	0.0583832	0.0316503	-0.159303
OC_10M	-0.00431899	0.103423	-0.0948789	-0.0740804	0.00975161	-0.0328299	-0.0541042	-0.0502921	0.0744126	-0.0826508	0.205381	0.260408	-0.0245125	-0.0541316	-0.0838813	-0.110275	-0.019776	-0.0282185	0.0767751
OC_20F	-0.0157115	0.108192	-0.0850884	-0.0521743	0.00253614	-0.0227788	-0.00505113	-0.0338952	0.18552	-0.0474065	0.224848	-0.062843	0.489312	0.0130259	-0.0777095	-0.0290739	0.0623658	-0.00711471	0.112631
OC_20M	-0.00534951	0.130315	-0.0804202	-0.0697748	-0.00126525	-0.0796716	-0.0612181	-0.0624968	0.194774	-0.0581193	0.230214	-0.0515528	-0.0608817	-0.0229601	-0.0769697	-0.13628	0.0180061	-0.0348782	0.272713
PC_01F	-0.0618612	0.148184	0.19026	-0.025767	0.135502	0.135335	-0.00680183	-0.0564046	-0.0177027	0.00977682	-0.0161473	-0.0304204	-0.0778429	-0.08264	-0.0369813	-0.126283	-0.0285845	-0.0174326	-0.149045
PC_01M	-0.04548	0.127223	0.19543	0.250276	0.223652	0.0825878	-0.0385171	0.0192398	-0.0524714	0.0151058	-0.0247087	-0.0509694	0.00232328	-0.0944334	-0.0296071	-0.168998	-0.0282796	-0.0207623	0.0135677
PC_04F	-0.0431241	0.00329453	-0.0179373	-0.0421823	0.107684	-0.00363741	0.00119436	0.172123	0.0387443	0.0605179	0.0976373	-0.0612894	-0.0435261	-0.0232154	-0.0477439	-0.0714156	-0.0134831	-0.0234829	0.0878651
PC_04M	-0.0493966	0.0120574	0.00837669	-0.0143268	-0.00633769	-0.0737873	-0.00219974	0.00157099	-0.00116058	0.111742	0.113939	-0.056075	-0.0439035	-0.0376026	-0.0547691	0.00446644	-0.0262473	-0.0270112	-0.0138226
PC_10F	-0.066558	-0.0182567	-0.01991	-0.0604553	-0.086841	-0.124134	-0.0181717	-0.0531385	-0.0404684	0.124583	0.118571	-0.0640142	-0.0545563	-0.0353255	-0.07225	0.113538	0.0280845	0.0477252	-0.183695
PC_10M	-0.0405437	-0.0105085	-0.0409868	-0.0797985	0.0276245	-0.0628964	0.000273077	-0.042963	0.00829248	0.112023	0.0948664	0.279169	-0.0361728	-0.0182392	-0.0503942	0.0169985	-0.0262535	-0.0126781	-0.0293125
PC_20F	-0.052049	-0.0457341	-0.0309099	-0.082084	-0.0870209	-0.0615572	0.01174	-0.0536927	-0.0089045	0.148653	0.105453	-0.0580779	0.29715	0.0201564	-0.0571491	0.0865663	-0.0101579	-0.0144597	0.0391573
PC_20M	-0.0414845	-0.018257	-0.0493215	-0.0754208	-0.0153363	-0.0355353	-0.0202239	-0.0269031	0.00741493	0.0952413	0.102969	-0.026103	-0.0669377	-0.00239537	-0.0641684	-0.0150762	-0.038879	-0.0167851	0.178386
TC_01F	-0.061931	0.127399	0.250992	-0.0534801	0.0399716	0.0697907	-0.0202626	-0.0928934	-0.0312943	-0.048979	-0.00895101	-0.0153397	-0.0889184	-0.0826274	-0.0216597	-0.0682032	-0.019279	-0.0308078	-0.164664
TC_01M	-0.0576921	0.0769205	0.356969	0.301132	0.114978	0.0967015	-0.00727959	-0.0519152	-0.0659548	-0.0486298	-0.0186804	-0.0407454	0.00544943	-0.0814907	0.0194242	-0.05963	0.00175526	0.0167982	0.0602182
TC_04F	-0.0711373	-0.002643	0.13656	-0.0645954	-0.0844915	-0.0899664	0.0110557	0.204365	0.0805559	0.11162	0.0943813	-0.0744349	-0.0812112	-0.0441238	-0.0456104	0.110525	-0.0449403	-0.0231326	0.0269114
TC_04M	-0.0632895	0.0267519	0.15392	-0.0184173	-0.00957907	-0.0427166	0.0419084	-0.0268748	0.019614	0.135317	0.0930726	-0.0590393	-0.0482152	-0.0444725	-0.0328956	0.0584199	-0.0148844	-0.0142326	0.0425319
TC_10F	-0.0658164	-0.0334441	0.0628213	-0.0586585	-0.0823384	-0.0756168	-0.0144126	0.00686473	-0.0750859	0.0800477	0.0124984	-0.0546401	-0.0439543	-0.081543	-0.0367145	0.162331	0.964525	-0.0149342	-0.154238
TC_10M	-0.0532893	0.00451475	0.0796647	-0.0659389	-0.0161907	-0.0747175	-0.0176573	-0.0241566	-0.019445	0.129851	0.0478093	0.323011	-0.005719	-0.0552064	-0.0176772	0.133362	0.0196688	-0.0259666	-0.0742324
TC_20F	-0.055182	-0.0116635	0.0467262	-0.0513365	-0.0518397	-0.0793401	0.0245413	-0.0342729	-0.0104263	0.145912	0.0634732	-0.0365551	0.203798	-0.0333887	-0.0286385	0.155844	0.0188884	-0.0214948	0.0758103
TC_20M	-0.0539858	0.00379043	0.0247684	-0.0777547	-0.0995651	-0.0885975	0.00531621	-0.0195767	-0.0225759	0.18606	0.108413	-0.0205132	-0.0849572	-0.0219306	-0.0439978	0.126788	0.0211227	-0.0167946	0.316615
