# Supplementary material for: Annotation and cluster analysis of spatiotemporal- and sex-related lncRNA expression in rhesus macaque brain
Source: HighWire-hosted journal article supplement (doi:10.1101/gr.217463.116), 2017-07-07
Supplement: Supplemental_Material.tar.gz [file LncRNA_homology_result.xlsx]

## Sheet: Gorilla
LncRNA	Gorilla_LncRNA	Identity	Length	Mismatch	Gap	Q_start	Q_end	O_start	O_end	E-value	Score
XLOC_000002	NONGGOT002292.1	85.32	252	22	3	1305	1541	1142	1393	2e-52	206
XLOC_000002	NONGGOT002292.1	85.32	252	22	3	826	1062	1142	1393	1e-52	206
XLOC_000002	NONGGOT002292.1	85.32	252	22	3	787	1023	1142	1393	1e-52	206
XLOC_000002	NONGGOT002292.1	85.32	252	22	3	776	1012	1142	1393	1e-52	206
XLOC_000004	NONGGOT003264.1	84.44	90	8	2	1066	1155	1621	1538	3e-08	60
XLOC_000009	NONGGOT013734.1	97.24	434	11	1	5	438	433	1	0	757
XLOC_000013	NONGGOT009059.1	88.24	255	24	3	452	701	754	1007	9e-66	250
XLOC_000015	NONGGOT020163.1	88.63	255	25	2	920	1172	2956	3208	8e-70	264
XLOC_000015	NONGGOT020163.1	88.63	255	25	2	1011	1263	2956	3208	9e-70	264
XLOC_000015	NONGGOT020163.1	88.63	255	25	2	893	1145	2956	3208	8e-70	264
XLOC_000015	NONGGOT020163.1	88.63	255	25	2	1189	1441	2956	3208	9e-70	264
XLOC_000016	NONGGOT008215.1	100	24	0	0	899	922	2456	2479	6e-05	48.1
XLOC_000016	NONGGOT008215.1	100	24	0	0	1204	1227	2456	2479	7e-05	48.1
XLOC_000017	NONGGOT013332.1	90.48	84	8	0	774	857	1117	1034	1e-21	103
XLOC_000017	NONGGOT007902.1	92.73	275	19	1	1195	1468	136	410	3e-104	379
XLOC_000020	NONGGOT005293.1	90.83	436	38	2	59	493	3912	4346	6e-151	531
XLOC_000023	NONGGOT000983.1	91.86	848	58	5	1699	2541	842	1	0	1104
XLOC_000023	NONGGOT000983.1	92.88	660	42	3	1316	1972	658	1	0	916
XLOC_000023	NONGGOT000983.1	91.79	828	57	5	209	1031	822	1	0	1072
XLOC_000023	NONGGOT000983.1	91.77	826	57	5	61	881	820	1	0	1068
XLOC_000024	NONGGOT017607.1	97.06	34	1	0	1	34	1129	1162	8e-09	60
XLOC_000025	NONGGOT005422.1	85.86	1047	136	7	4008	5046	2365	1323	0	856
XLOC_000026	NONGGOT018256.1	96.43	28	1	0	1182	1209	2325	2298	0.0002	48.1
XLOC_000026	NONGGOT018256.1	96.43	28	1	0	440	467	2325	2298	0.0001	48.1
XLOC_000031	NONGGOT001585.1	87.7	244	30	0	113	356	1211	968	2e-64	246
XLOC_000033	NONGGOT000056.1	93.6	172	10	1	272	443	1	171	1e-64	246
XLOC_000033	NONGGOT000056.1	93.6	172	10	1	19	190	1	171	2e-64	246
XLOC_000035	NONGGOT016394.1	82.26	124	22	0	1192	1315	372	249	5e-12	71.9
XLOC_000035	NONGGOT016394.1	82.26	124	22	0	1340	1463	372	249	6e-12	71.9
XLOC_000035	NONGGOT016394.1	82.26	124	22	0	1262	1385	372	249	6e-12	71.9
XLOC_000035	NONGGOT016394.1	82.26	124	22	0	1263	1386	372	249	6e-12	71.9
XLOC_000035	NONGGOT016394.1	82.26	124	22	0	733	856	372	249	4e-12	71.9
XLOC_000035	NONGGOT016394.1	82.26	124	22	0	672	795	372	249	3e-12	71.9
XLOC_000035	NONGGOT016394.1	82.26	124	22	0	704	827	372	249	4e-12	71.9
XLOC_000042	NONGGOT000083.1	93.06	72	5	0	172	243	276	347	2e-22	103
XLOC_000045	NONGGOT015202.1	93.55	31	2	0	557	587	2110	2140	0.0001	46.1
XLOC_000045	NONGGOT015202.1	93.55	31	2	0	557	587	2110	2140	0.0002	46.1
XLOC_000045	NONGGOT015202.1	93.55	31	2	0	241	271	2110	2140	8e-05	46.1
XLOC_000045	NONGGOT013855.1	85.86	99	12	1	632	728	193	95	2e-14	79.8
XLOC_000045	NONGGOT013855.1	85.86	99	12	1	198	294	193	95	1e-14	79.8
XLOC_000045	NONGGOT013855.1	85.86	99	12	1	146	242	193	95	1e-14	79.8
XLOC_000046	NONGGOT001945.1	86.92	237	31	0	385	621	2986	3222	6e-58	224
XLOC_000047	NONGGOT000539.1	91.49	47	4	0	467	513	29	75	2e-09	61.9
XLOC_000047	NONGGOT000539.1	91.49	47	4	0	505	551	29	75	3e-09	61.9
XLOC_000047	NONGGOT000539.1	91.49	47	4	0	613	659	29	75	3e-09	61.9
XLOC_000052	NONGGOT000098.1	95.48	177	7	1	1819	1994	1	177	5e-74	280
XLOC_000053	NONGGOT007849.1	100	24	0	0	426	449	4040	4017	2e-05	48.1
XLOC_000056	NONGGOT008924.1	85.9	312	43	1	395	706	488	798	2e-69	262
XLOC_000057	NONGGOT020155.1	89.88	257	21	3	433	688	594	846	8e-69	260
XLOC_000057	NONGGOT020155.1	89.88	257	21	3	1878	2133	594	846	2e-68	260
XLOC_000058	NONGGOT010756.1	100	24	0	0	168	191	489	512	1e-05	48.1
XLOC_000060	NONGGOT008929.1	90.32	93	9	0	131	223	2400	2492	2e-25	113
XLOC_000061	NONGGOT000709.1	90.14	71	7	0	461	531	965	895	1e-16	85.7
XLOC_000061	NONGGOT000709.1	90.14	71	7	0	260	330	965	895	8e-17	85.7
XLOC_000062	NONGGOT016820.1	91.89	111	8	1	1180	1289	1314	1424	6e-33	141
XLOC_000068	NONGGOT015061.1	89.47	38	4	0	94	131	227	190	0.0002	44.1
XLOC_000068	NONGGOT015061.1	89.47	38	4	0	71	108	227	190	0.0003	44.1
XLOC_000068	NONGGOT000556.1	89.62	183	18	1	94	275	1649	1467	2e-52	204
XLOC_000071	NONGGOT007403.1	86.07	244	20	3	1	233	536	776	1e-54	212
XLOC_000072	NONGGOT009264.1	93.18	264	13	2	1247	1510	324	582	1e-101	371
XLOC_000073	NONGGOT014589.1	91.85	233	18	1	4356	4587	567	799	3e-81	303
XLOC_000073	NONGGOT012420.1	94.29	35	2	0	672	706	327	293	6e-07	54
XLOC_000073	NONGGOT012420.1	94.29	35	2	0	858	892	327	293	8e-07	54
XLOC_000073	NONGGOT012420.1	94.29	35	2	0	398	432	327	293	4e-07	54
XLOC_000073	NONGGOT012420.1	94.29	35	2	0	846	880	327	293	1e-06	54
XLOC_000075	NONGGOT003159.1	96.23	53	2	0	24	76	1483	1535	2e-17	89.7
XLOC_000077	NONGGOT015444.1	86.86	236	30	1	824	1059	3243	3009	5e-55	214
XLOC_000078	NONGGOT010322.1	96.61	59	2	0	370	428	311	369	2e-21	101
XLOC_000078	NONGGOT010322.1	96.61	59	2	0	297	355	311	369	1e-21	101
XLOC_000082	NONGGOT009314.1	92.34	209	16	0	883	1091	2762	2554	8e-77	287
XLOC_000086	NONGGOT001150.1	100	30	0	0	317	346	280	251	5e-09	60
XLOC_000087	NONGGOT000171.1	93.5	569	34	2	57	623	1	568	0	821
XLOC_000087	NONGGOT000171.1	93.5	569	34	2	70	636	1	568	0	821
XLOC_000087	NONGGOT000171.1	93.5	569	34	2	224	790	1	568	0	821
XLOC_000087	NONGGOT000171.1	93.5	569	34	2	258	824	1	568	0	821
XLOC_000089	NONGGOT010179.1	88.41	233	26	1	14	246	422	653	7e-63	240
XLOC_000091	NONGGOT009394.1	93.94	33	2	0	291	323	398	430	7e-06	50.1
XLOC_000094	NONGGOT003025.1	90.65	139	11	1	1988	2124	1016	878	2e-40	167
XLOC_000094	NONGGOT003025.1	90.65	139	11	1	1848	1984	1016	878	2e-40	167
XLOC_000094	NONGGOT003025.1	90.65	139	11	1	1661	1797	1016	878	2e-40	167
XLOC_000099	NONGGOT009228.1	93.33	30	2	0	272	301	1132	1103	0.0006	44.1
XLOC_000101	NONGGOT010794.1	100	39	0	0	557	595	90	128	4e-14	77.8
XLOC_000104	NONGGOT016843.1	92.19	64	5	0	4	67	3083	3020	6e-17	87.7
XLOC_000104	NONGGOT008911.1	88.54	96	11	0	1083	1178	215	120	1e-21	103
XLOC_000104	NONGGOT008911.1	88.54	96	11	0	328	423	215	120	5e-22	103
XLOC_000109	NONGGOT009156.1	94.74	38	2	0	1	38	215	178	7e-09	60
XLOC_000112	NONGGOT004662.1	92.44	119	7	1	30	146	359	241	3e-38	159
XLOC_000114	NONGGOT020544.1	80.91	110	21	0	325	434	3613	3722	2e-06	52
XLOC_000114	NONGGOT020544.1	80.91	110	21	0	310	419	3613	3722	2e-06	52
XLOC_000115	NONGGOT000193.1	96.39	83	3	0	1	83	139	221	2e-33	141
XLOC_000115	NONGGOT000193.1	97.96	49	1	0	1	49	173	221	8e-18	89.7
XLOC_000115	NONGGOT000195.1	94.29	280	14	1	82	359	1	280	7e-118	422
XLOC_000120	NONGGOT013304.1	85.71	98	14	0	432	529	4765	4668	8e-16	83.8
XLOC_000121	NONGGOT011238.1	92.75	69	5	0	260	328	1114	1046	3e-20	97.6
XLOC_000122	NONGGOT015553.1	92.16	51	4	0	584	634	51	1	2e-11	69.9
XLOC_000122	NONGGOT015553.1	92.16	51	4	0	303	353	51	1	1e-11	69.9
XLOC_000126	NONGGOT001477.1	93.75	176	11	0	769	944	41	216	2e-69	262
XLOC_000127	NONGGOT000237.1	92.91	141	9	1	83	222	349	489	3e-49	192
XLOC_000129	NONGGOT000087.1	87.55	265	29	3	58	321	1991	1730	1e-63	242
XLOC_000138	NONGGOT000276.1	94.08	169	10	0	64	232	1	169	4e-68	256
XLOC_000139	NONGGOT000281.1	93.62	188	9	2	300	487	1	185	3e-70	264
XLOC_000145	NONGGOT001287.1	93.69	111	6	1	137	246	830	720	4e-38	157
XLOC_000145	NONGGOT001287.1	93.75	112	6	1	137	247	830	719	1e-38	159
XLOC_000145	NONGGOT001287.1	93.75	112	6	1	137	247	830	719	1e-38	159
XLOC_000146	NONGGOT000311.1	93.55	186	6	1	10	195	1	180	6e-74	276
XLOC_000146	NONGGOT000311.1	97.42	155	4	0	192	346	225	379	5e-74	276
XLOC_000148	NONGGOT015363.1	88.03	117	14	0	5963	6079	189	73	3e-26	121
XLOC_000148	NONGGOT009816.1	83.67	245	28	2	612	845	1630	1873	1e-42	172
XLOC_000148	NONGGOT009816.1	83.67	245	28	2	332	565	1630	1873	8e-43	172
XLOC_000148	NONGGOT015363.1	88.03	117	14	0	5987	6103	189	73	3e-26	121
XLOC_000153	NONGGOT000331.1	97.89	473	9	1	1	473	545	1016	0	809
XLOC_000153	NONGGOT000331.1	94.88	332	13	1	385	712	1036	1367	1e-147	521
XLOC_000154	NONGGOT000331.1	91.46	199	16	1	518	715	1372	1570	2e-66	252
XLOC_000154	NONGGOT000331.1	89.6	548	40	3	355	885	1372	1919	0	638
XLOC_000155	NONGGOT003337.1	96.77	31	1	0	1631	1661	594	564	2e-06	54
XLOC_000158	NONGGOT007359.1	87.84	74	9	0	340	413	466	393	1e-13	75.8
XLOC_000158	NONGGOT007359.1	87.84	74	9	0	267	340	466	393	8e-14	75.8
XLOC_000158	NONGGOT007359.1	87.84	74	9	0	373	446	466	393	1e-13	75.8
XLOC_000163	NONGGOT000339.1	98.77	162	2	0	1	162	12	173	3e-83	305
XLOC_000165	NONGGOT016010.1	95.45	44	2	0	193	236	291	248	8e-13	71.9
XLOC_000166	NONGGOT016378.1	90.67	75	7	0	798	872	196	270	1e-18	93.7
XLOC_000166	NONGGOT016378.1	90.67	75	7	0	705	779	196	270	1e-18	93.7
XLOC_000166	NONGGOT018671.1	89.09	55	6	0	312	366	412	466	2e-09	61.9
XLOC_000166	NONGGOT016378.1	90.67	75	7	0	700	774	196	270	1e-18	93.7
XLOC_000166	NONGGOT002178.1	88.48	217	25	0	10	226	1278	1062	2e-42	170
XLOC_000167	NONGGOT019066.1	92	100	8	0	388	487	384	285	2e-31	135
XLOC_000169	NONGGOT016289.1	93.96	149	9	0	2126	2274	1376	1524	2e-57	224
XLOC_000169	NONGGOT016289.1	93.96	149	9	0	2158	2306	1376	1524	2e-57	224
XLOC_000170	NONGGOT000347.1	94.02	351	21	0	373	723	70	420	4e-150	529
XLOC_000174	NONGGOT001346.1	100	37	0	0	13	49	183	147	2e-13	73.8
XLOC_000177	NONGGOT003875.1	92.45	53	4	0	1029	1081	1092	1040	1e-12	73.8
XLOC_000177	NONGGOT000378.1	100	33	0	0	1	33	56	88	3e-10	65.9
XLOC_000181	NONGGOT004456.1	100	22	0	0	752	773	249	270	0.0007	44.1
XLOC_000187	NONGGOT016564.1	96.97	33	1	0	343	375	636	604	2e-08	58
XLOC_000188	NONGGOT004901.1	100	25	0	0	19	43	206	230	3e-06	50.1
XLOC_000190	NONGGOT004271.1	85.93	135	19	0	228	362	308	442	9e-26	117
XLOC_000191	NONGGOT014084.1	100	22	0	0	705	726	323	302	0.0007	44.1
XLOC_000193	NONGGOT009025.1	90.71	183	14	1	1	180	989	1171	4e-58	224
XLOC_000195	NONGGOT006236.1	91.89	37	3	0	512	548	934	898	7e-06	50.1
XLOC_000196	NONGGOT000436.1	94.95	396	20	0	5	400	9	404	3e-179	626
XLOC_000199	NONGGOT017607.1	95.89	73	3	0	1022	1094	1157	1085	5e-27	121
XLOC_000205	NONGGOT014859.1	88.85	269	20	1	825	1093	259	1	3e-82	305
XLOC_000205	NONGGOT007902.1	89.57	278	28	1	1333	1609	141	418	1e-84	313
XLOC_000206	NONGGOT016288.1	89	200	21	1	49	247	3311	3112	2e-55	214
XLOC_000207	NONGGOT016299.1	91.94	248	19	1	26	273	768	522	4e-80	297
XLOC_000208	NONGGOT013306.1	95.24	84	4	0	51	134	762	845	1e-31	135
XLOC_000209	NONGGOT015421.1	100	22	0	0	91	112	150	171	0.0004	44.1
XLOC_000209	NONGGOT015421.1	100	22	0	0	86	107	150	171	0.0002	44.1
XLOC_000211	NONGGOT017776.1	100	25	0	0	229	253	19	43	6e-06	50.1
XLOC_000222	NONGGOT000539.1	92.31	52	4	0	661	712	27	78	3e-12	71.9
XLOC_000224	NONGGOT016299.1	89.51	267	26	2	405	669	789	523	3e-78	291
XLOC_000224	NONGGOT016299.1	89.51	267	26	2	292	556	789	523	3e-78	291
XLOC_000224	NONGGOT005412.1	84.87	119	18	0	112	230	982	864	1e-18	93.7
XLOC_000225	NONGGOT000492.1	92.75	345	24	1	944	1288	79	422	2e-134	478
XLOC_000225	NONGGOT000492.1	93.21	368	24	1	208	575	56	422	2e-148	523
XLOC_000226	NONGGOT000481.1	98.47	196	3	0	137	332	918	723	1e-100	365
XLOC_000226	NONGGOT000481.1	98.47	196	3	0	87	282	918	723	1e-100	365
XLOC_000226	NONGGOT000481.1	98.47	196	3	0	40	235	918	723	1e-100	365
XLOC_000226	NONGGOT000481.1	98.47	196	3	0	37	232	918	723	1e-100	365
XLOC_000226	NONGGOT000481.1	98.45	194	3	0	58	251	916	723	1e-99	361
XLOC_000226	NONGGOT000481.1	98.45	194	3	0	25	218	916	723	1e-99	361
XLOC_000226	NONGGOT000481.1	98.47	196	3	0	9	204	918	723	9e-101	365
XLOC_000226	NONGGOT000481.1	98.45	194	3	0	9	202	916	723	1e-99	361
XLOC_000228	NONGGOT009357.1	89.66	58	6	0	1181	1238	122	65	7e-11	67.9
XLOC_000229	NONGGOT001464.1	94.12	102	6	0	19	120	650	751	3e-37	155
XLOC_000229	NONGGOT001464.1	94.12	102	6	0	13	114	650	751	3e-37	155
XLOC_000230	NONGGOT001464.1	90	120	12	0	184	303	694	813	8e-34	143
XLOC_000231	NONGGOT000112.1	87.63	97	12	0	146	242	739	835	3e-20	97.6
XLOC_000233	NONGGOT001464.1	91.46	82	7	0	1	82	668	749	2e-23	107
XLOC_000237	NONGGOT012389.1	90.62	96	9	0	117	212	347	442	1e-26	119
XLOC_000245	NONGGOT000709.1	90.91	66	6	0	271	336	961	896	3e-16	83.8
XLOC_000246	NONGGOT013455.1	93.33	45	3	0	178	222	45	1	9e-11	65.9
XLOC_000250	NONGGOT015675.1	90.54	222	21	0	1048	1269	11	232	6e-73	274
XLOC_000251	NONGGOT011685.1	88.79	223	25	0	869	1091	764	542	9e-64	244
XLOC_000253	NONGGOT020163.1	92.55	255	18	1	499	752	6416	6670	3e-95	347
XLOC_000254	NONGGOT001730.1	92.99	214	15	0	338	551	203	416	1e-82	305
XLOC_000254	NONGGOT001730.1	92.99	214	15	0	315	528	203	416	1e-82	305
XLOC_000254	NONGGOT001730.1	92.99	214	15	0	275	488	203	416	1e-82	305
XLOC_000254	NONGGOT001730.1	92.99	214	15	0	254	467	203	416	1e-82	305
XLOC_000259	NONGGOT009631.1	87.23	94	12	0	381	474	363	270	2e-18	91.7
XLOC_000259	NONGGOT009631.1	87.23	94	12	0	293	386	363	270	2e-18	91.7
XLOC_000259	NONGGOT009631.1	87.23	94	12	0	177	270	363	270	1e-18	91.7
XLOC_000260	NONGGOT001715.1	98.85	174	2	0	367	540	42	215	1e-89	329
XLOC_000260	NONGGOT018648.1	100	27	0	0	363	389	170	144	9e-07	54
XLOC_000260	NONGGOT001715.1	98.85	174	2	0	69	242	42	215	1e-89	329
XLOC_000260	NONGGOT001715.1	98.85	174	2	0	261	434	42	215	1e-89	329
XLOC_000260	NONGGOT001715.1	98.88	178	2	0	285	462	42	219	3e-92	337
XLOC_000260	NONGGOT001715.1	98.88	178	2	0	289	466	42	219	3e-92	337
XLOC_000260	NONGGOT001715.1	98.85	174	2	0	285	458	42	215	1e-89	329
XLOC_000260	NONGGOT001715.1	97.22	216	5	1	210	425	1	215	9e-103	373
XLOC_000260	NONGGOT001715.1	98.85	174	2	0	44	217	42	215	1e-89	329
XLOC_000260	NONGGOT001715.1	98.88	178	2	0	309	486	42	219	3e-92	337
XLOC_000261	NONGGOT001716.1	97.06	34	1	0	297	330	185	218	5e-09	60
XLOC_000261	NONGGOT001716.1	97.06	34	1	0	743	776	185	218	1e-08	60
XLOC_000265	NONGGOT010054.1	90.91	44	4	0	457	500	319	362	2e-07	56
XLOC_000265	NONGGOT001693.1	92.16	102	7	1	192	293	1	101	5e-30	131
XLOC_000265	NONGGOT001693.1	92.16	102	7	1	189	290	1	101	8e-30	131
XLOC_000265	NONGGOT001693.1	92.16	102	7	1	184	285	1	101	7e-30	131
XLOC_000265	NONGGOT001693.1	92.16	102	7	1	165	266	1	101	2e-30	131
XLOC_000265	NONGGOT001693.1	92.16	102	7	1	134	235	1	101	3e-30	131
XLOC_000265	NONGGOT001693.1	92.16	102	7	1	134	235	1	101	5e-30	131
XLOC_000265	NONGGOT010054.1	90.91	44	4	0	545	588	319	362	2e-07	56
XLOC_000265	NONGGOT011323.1	89.8	255	24	2	81	333	1462	1716	7e-76	283
XLOC_000269	NONGGOT014859.1	86.5	237	30	1	2377	2611	237	1	2e-53	210
XLOC_000269	NONGGOT014859.1	86.5	237	30	1	2315	2549	237	1	2e-53	210
XLOC_000269	NONGGOT014859.1	86.5	237	30	1	2312	2546	237	1	2e-53	210
XLOC_000269	NONGGOT014859.1	86.5	237	30	1	2474	2708	237	1	2e-53	210
XLOC_000274	NONGGOT019802.1	88.37	301	34	1	210	509	974	1274	1e-84	311
XLOC_000274	NONGGOT019802.1	88.37	301	34	1	129	428	974	1274	1e-84	311
XLOC_000275	NONGGOT000753.1	96.43	84	3	0	307	390	407	324	1e-33	143
XLOC_000275	NONGGOT000753.1	96.43	84	3	0	292	375	407	324	6e-34	143
XLOC_000276	NONGGOT000753.1	95.56	135	6	0	1	135	242	108	4e-57	220
XLOC_000276	NONGGOT000753.1	95.56	135	6	0	1	135	242	108	5e-57	220
XLOC_000276	NONGGOT000753.1	95.56	135	6	0	1	135	242	108	3e-57	220
XLOC_000276	NONGGOT000753.1	95.35	129	6	0	1	129	235	107	2e-53	208
XLOC_000276	NONGGOT000753.1	90.62	64	6	0	1	64	171	108	1e-14	79.8
XLOC_000276	NONGGOT018810.1	85.8	162	22	1	306	466	308	469	3e-30	131
XLOC_000278	NONGGOT001672.1	92.79	222	16	0	153	374	50	271	2e-85	313
XLOC_000279	NONGGOT000751.1	97.61	209	4	1	409	616	342	134	4e-101	367
XLOC_000282	NONGGOT020686.1	94.74	38	2	0	115	152	397	360	6e-09	60
XLOC_000284	NONGGOT011956.1	100	22	0	0	353	374	58	37	0.0003	44.1
XLOC_000285	NONGGOT019319.1	100	22	0	0	262	283	98	119	0.0002	44.1
XLOC_000289	NONGGOT000729.1	94.87	78	4	0	161	238	1256	1179	4e-28	123
XLOC_000289	NONGGOT004321.1	93.75	192	11	1	830	1020	147	338	4e-74	278
XLOC_000289	NONGGOT000729.1	94.87	78	4	0	657	734	1256	1179	9e-28	123
XLOC_000289	NONGGOT000729.1	98.92	93	1	0	839	931	1151	1059	1e-43	176
XLOC_000289	NONGGOT000729.1	98.92	93	1	0	751	843	1151	1059	1e-43	176
XLOC_000291	NONGGOT017854.1	87.76	49	6	0	596	644	260	212	1e-05	50.1
XLOC_000291	NONGGOT001651.1	97.28	331	8	1	375	704	1229	1559	3e-164	577
XLOC_000293	NONGGOT014771.1	96.55	29	1	0	838	866	113	85	1e-05	50.1
XLOC_000296	NONGGOT005740.1	89.16	83	8	1	695	776	11	93	2e-16	85.7
XLOC_000300	NONGGOT007939.1	91.67	36	3	0	445	480	198	233	5e-05	48.1
XLOC_000303	NONGGOT008530.1	92.62	149	11	0	2836	2984	843	991	7e-53	208
XLOC_000303	NONGGOT018267.1	89.58	48	5	0	747	794	402	355	5e-07	56
XLOC_000303	NONGGOT018267.1	89.58	48	5	0	518	565	402	355	5e-07	56
XLOC_000304	NONGGOT020662.1	88.1	84	10	0	1258	1341	703	786	9e-17	87.7
XLOC_000308	NONGGOT019276.1	87.26	157	15	2	225	376	456	300	7e-34	143
XLOC_000312	NONGGOT009264.1	87.07	232	19	3	32	253	312	542	2e-55	214
XLOC_000314	NONGGOT000696.1	94.67	75	4	0	773	847	340	266	6e-26	117
XLOC_000314	NONGGOT000696.1	94.67	75	4	0	584	658	340	266	5e-26	117
XLOC_000314	NONGGOT000696.1	94.67	75	4	0	635	709	340	266	5e-26	117
XLOC_000314	NONGGOT000696.1	94.59	74	4	0	505	578	339	266	2e-25	115
XLOC_000314	NONGGOT000696.1	94.67	75	4	0	404	478	340	266	3e-26	117
XLOC_000314	NONGGOT000696.1	94.67	75	4	0	666	740	340	266	5e-26	117
XLOC_000316	NONGGOT012255.1	82.89	339	52	6	420	755	677	1012	4e-40	165
XLOC_000319	NONGGOT001609.1	95.33	214	9	1	312	525	130	342	2e-81	301
XLOC_000320	NONGGOT000688.1	95.98	174	7	0	1	174	283	110	4e-78	289
XLOC_000322	NONGGOT003892.1	82.23	349	49	6	67	405	895	1240	1e-40	167
XLOC_000322	NONGGOT003892.1	82.23	349	49	6	67	405	895	1240	5e-41	167
XLOC_000322	NONGGOT003892.1	82.23	349	49	6	40	378	895	1240	1e-40	167
XLOC_000322	NONGGOT003892.1	82.23	349	49	6	39	377	895	1240	7e-41	167
XLOC_000322	NONGGOT003892.1	82.23	349	49	6	16	354	895	1240	4e-41	167
XLOC_000322	NONGGOT003892.1	82.23	349	49	6	16	354	895	1240	9e-41	167
XLOC_000322	NONGGOT003892.1	82.23	349	49	6	10	348	895	1240	4e-41	167
XLOC_000322	NONGGOT003892.1	81.68	322	47	5	2	313	921	1240	1e-34	145
XLOC_000322	NONGGOT001607.1	95	40	2	0	282	321	173	212	3e-10	63.9
XLOC_000323	NONGGOT015103.1	85.92	632	87	2	50	679	539	1170	2e-150	531
XLOC_000324	NONGGOT001606.1	94.51	255	9	1	1	250	439	693	5e-110	394
XLOC_000326	NONGGOT020697.1	90.79	76	7	0	1495	1570	1097	1022	4e-19	95.6
XLOC_000331	NONGGOT013221.1	94.44	36	2	0	8	43	70	35	7e-08	56
XLOC_000332	NONGGOT019121.1	95.24	42	2	0	76	117	334	293	4e-11	67.9
XLOC_000332	NONGGOT000849.1	87.67	146	16	2	168	312	31	175	4e-30	131
XLOC_000332	NONGGOT001594.1	97.81	228	1	1	546	769	68	295	3e-114	410
XLOC_000332	NONGGOT012151.1	89.25	93	10	0	38	130	1405	1497	2e-22	105
XLOC_000334	NONGGOT013065.1	83.49	109	18	0	335	443	423	315	4e-13	73.8
XLOC_000342	NONGGOT018116.1	89.89	267	23	2	1944	2210	2309	2571	2e-81	303
XLOC_000342	NONGGOT018116.1	89.89	267	23	2	1944	2210	2309	2571	2e-81	303
XLOC_000342	NONGGOT004766.1	91.94	186	15	0	2118	2303	347	162	2e-65	250
XLOC_000342	NONGGOT016755.1	88.17	93	11	0	816	908	188	96	6e-20	97.6
XLOC_000342	NONGGOT018116.1	89.89	267	23	2	2055	2321	2309	2571	2e-81	303
XLOC_000342	NONGGOT004766.1	91.94	186	15	0	2091	2276	347	162	2e-65	250
XLOC_000342	NONGGOT016755.1	88.17	93	11	0	1201	1293	188	96	9e-20	97.6
XLOC_000342	NONGGOT018116.1	89.89	267	23	2	2051	2317	2309	2571	2e-81	303
XLOC_000342	NONGGOT004766.1	91.94	186	15	0	1987	2172	347	162	2e-65	250
XLOC_000342	NONGGOT020269.1	91.49	47	4	0	334	380	1175	1221	2e-09	61.9
XLOC_000342	NONGGOT004766.1	91.94	186	15	0	1871	2056	347	162	2e-65	250
XLOC_000342	NONGGOT016755.1	88.17	93	11	0	543	635	188	96	4e-20	97.6
XLOC_000342	NONGGOT018116.1	89.89	267	23	2	1765	2031	2309	2571	2e-81	303
XLOC_000342	NONGGOT018116.1	89.89	267	23	2	1762	2028	2309	2571	2e-81	303
XLOC_000342	NONGGOT004766.1	91.94	186	15	0	2073	2258	347	162	2e-65	250
XLOC_000343	NONGGOT019383.1	88.72	337	34	2	1534	1866	2109	2445	3e-97	355
XLOC_000349	NONGGOT017510.1	83.53	85	14	0	603	687	430	514	4e-08	58
XLOC_000349	NONGGOT017510.1	83.53	85	14	0	1010	1094	430	514	7e-08	58
XLOC_000350	NONGGOT009561.1	87.41	143	13	2	791	929	379	520	2e-29	131
XLOC_000350	NONGGOT009561.1	87.41	143	13	2	651	789	379	520	1e-29	131
XLOC_000350	NONGGOT007653.1	90.1	101	8	1	1	101	179	277	2e-25	115
XLOC_000353	NONGGOT011646.1	85.11	94	14	0	107	200	43	136	3e-13	75.8
XLOC_000356	NONGGOT006693.1	100	23	0	0	31	53	4	26	7e-05	46.1
XLOC_000362	NONGGOT000924.1	87.72	114	12	1	37	148	754	641	4e-24	109
XLOC_000362	NONGGOT000819.1	94.44	126	7	0	176	301	539	414	1e-49	194
XLOC_000362	NONGGOT015541.1	86.49	222	20	3	147	358	1928	1707	6e-49	192
XLOC_000364	NONGGOT014449.1	87.1	155	19	1	50	203	2	156	2e-25	115
XLOC_000365	NONGGOT009183.1	89.58	48	5	0	17	64	20	67	1e-07	56
XLOC_000367	NONGGOT004382.1	86.05	129	17	1	325	453	214	87	2e-22	105
XLOC_000367	NONGGOT004382.1	86.05	129	17	1	551	679	214	87	3e-22	105
XLOC_000367	NONGGOT004382.1	86.05	129	17	1	540	668	214	87	3e-22	105
XLOC_000367	NONGGOT004382.1	86.05	129	17	1	206	334	214	87	2e-22	105
XLOC_000367	NONGGOT004382.1	86.05	129	17	1	213	341	214	87	2e-22	105
XLOC_000367	NONGGOT004382.1	86.05	129	17	1	228	356	214	87	2e-22	105
XLOC_000368	NONGGOT019383.1	94.7	151	7	1	1	151	2414	2265	1e-59	228
XLOC_000369	NONGGOT013125.1	91.4	93	8	0	2368	2460	581	489	2e-26	121
XLOC_000369	NONGGOT013125.1	91.4	93	8	0	2341	2433	581	489	3e-26	121
XLOC_000370	NONGGOT018281.1	83.93	112	18	0	492	603	161	50	9e-15	79.8
XLOC_000371	NONGGOT016299.1	90.76	249	21	2	709	956	789	542	8e-72	270
XLOC_000371	NONGGOT016299.1	90.76	249	21	2	713	960	789	542	8e-72	270
XLOC_000375	NONGGOT014861.1	100	23	0	0	569	591	286	308	0.0003	46.1
XLOC_000376	NONGGOT016951.1	82.86	70	12	0	261	330	471	540	0.0003	44.1
XLOC_000376	NONGGOT016951.1	82.86	70	12	0	329	398	471	540	0.0004	44.1
XLOC_000376	NONGGOT016951.1	82.86	70	12	0	248	317	471	540	0.0003	44.1
XLOC_000376	NONGGOT016951.1	82.86	70	12	0	343	412	471	540	0.0004	44.1
XLOC_000379	NONGGOT009452.1	83.22	149	25	0	4	152	1864	1716	3e-20	97.6
XLOC_000382	NONGGOT009021.1	93.41	91	6	0	839	929	126	216	1e-30	133
XLOC_000387	NONGGOT013502.1	100	24	0	0	687	710	202	225	5e-05	48.1
XLOC_000389	NONGGOT001765.1	91.82	269	19	2	150	416	1	268	7e-95	345
XLOC_000391	NONGGOT013035.1	86.57	134	12	2	245	376	352	223	2e-25	115
XLOC_000391	NONGGOT017607.1	96.47	85	3	0	296	380	1158	1074	1e-34	145
XLOC_000391	NONGGOT017607.1	96.47	85	3	0	245	329	1158	1074	1e-34	145
XLOC_000397	NONGGOT012726.1	91.67	36	3	0	392	427	1814	1849	2e-05	48.1
XLOC_000397	NONGGOT012726.1	91.67	36	3	0	585	620	1814	1849	4e-05	48.1
XLOC_000399	NONGGOT020428.1	88.46	52	6	0	1040	1091	13	64	2e-07	56
XLOC_000400	NONGGOT001747.1	89.17	351	31	1	1	344	237	587	5e-111	398
XLOC_000400	NONGGOT001746.1	97.06	204	6	0	30	233	70	273	9e-98	357
XLOC_000400	NONGGOT001746.1	97.06	204	6	0	30	233	70	273	7e-98	357
XLOC_000402	NONGGOT013769.1	94.77	153	8	0	231	383	219	67	1e-62	240
XLOC_000402	NONGGOT013769.1	94.77	153	8	0	231	383	219	67	1e-62	240
XLOC_000402	NONGGOT013768.1	88.49	139	16	0	58	196	366	228	2e-35	149
XLOC_000402	NONGGOT013768.1	88.49	139	16	0	58	196	366	228	3e-35	149
XLOC_000403	NONGGOT013981.1	93.24	74	5	0	10	83	2330	2257	3e-23	107
XLOC_000404	NONGGOT014379.1	85.79	985	91	18	2948	3908	19	978	0	761
XLOC_000407	NONGGOT014304.1	82.59	224	38	1	1069	1291	1301	1078	2e-28	127
XLOC_000407	NONGGOT014304.1	82.59	224	38	1	1069	1291	1301	1078	2e-28	127
XLOC_000410	NONGGOT013102.1	91.43	35	3	0	444	478	195	161	0.0001	46.1
XLOC_000410	NONGGOT016040.1	86.71	143	16	1	3	145	2364	2225	8e-30	129
XLOC_000410	NONGGOT017308.1	88.71	248	28	0	587	834	983	736	2e-71	270
XLOC_000410	NONGGOT017308.1	88.71	248	28	0	587	834	983	736	2e-71	270
XLOC_000411	NONGGOT014565.1	84.08	157	21	2	439	591	2258	2414	3e-21	101
XLOC_000412	NONGGOT002292.1	86.54	52	7	0	826	877	4928	4877	6e-05	48.1
XLOC_000413	NONGGOT007902.1	94.37	284	14	1	2940	3223	418	137	2e-119	430
XLOC_000413	NONGGOT007902.1	94.37	284	14	1	2940	3223	418	137	2e-119	430
XLOC_000413	NONGGOT007902.1	94.37	284	14	1	2940	3223	418	137	2e-119	430
XLOC_000413	NONGGOT007902.1	94.37	284	14	1	2940	3223	418	137	2e-119	430
XLOC_000414	NONGGOT003478.1	84.59	305	35	3	1	294	606	303	1e-58	226
XLOC_000414	NONGGOT003478.1	84.59	305	35	3	1	294	606	303	2e-58	226
XLOC_000414	NONGGOT011039.1	87.08	209	26	1	195	402	1206	998	2e-48	192
XLOC_000415	NONGGOT007777.1	85.83	360	49	1	69	428	2043	1686	6e-82	303
XLOC_000416	NONGGOT000944.1	92.68	369	26	1	1	368	1442	1074	5e-144	509
XLOC_000416	NONGGOT000944.1	92.68	369	26	1	1	368	1442	1074	4e-144	509
XLOC_000418	NONGGOT007403.1	88.89	108	11	1	164	271	774	668	5e-24	111
XLOC_000418	NONGGOT007403.1	88.89	108	11	1	164	271	774	668	6e-24	111
XLOC_000418	NONGGOT007403.1	88.89	108	11	1	164	271	774	668	7e-24	111
XLOC_000418	NONGGOT007403.1	88.89	108	11	1	164	271	774	668	5e-24	111
XLOC_000418	NONGGOT007403.1	88.89	108	11	1	164	271	774	668	4e-24	111
XLOC_000419	NONGGOT019571.1	85.56	270	32	3	255	521	422	157	1e-41	168
XLOC_000420	NONGGOT018255.1	87.73	269	31	2	423	691	1700	1434	2e-67	256
XLOC_000421	NONGGOT016299.1	92.25	271	16	3	674	941	521	789	9e-81	301
XLOC_000421	NONGGOT016299.1	92.25	271	16	3	674	941	521	789	9e-81	301
XLOC_000421	NONGGOT016299.1	92.25	271	16	3	674	941	521	789	1e-80	301
XLOC_000421	NONGGOT016299.1	92.25	271	16	3	674	941	521	789	1e-80	301
XLOC_000421	NONGGOT016299.1	92.25	271	16	3	674	941	521	789	1e-80	301
XLOC_000424	NONGGOT004861.1	86.97	238	30	1	374	611	1072	1308	5e-56	218
XLOC_000431	NONGGOT000972.1	90.98	133	12	0	186	318	784	652	7e-42	168
XLOC_000433	NONGGOT000031.1	95.8	119	5	0	477	595	2	120	2e-49	196
XLOC_000433	NONGGOT007232.1	85.42	96	14	0	1277	1372	520	615	3e-14	79.8
XLOC_000433	NONGGOT007232.1	85.42	96	14	0	1262	1357	520	615	3e-14	79.8
XLOC_000433	NONGGOT007232.1	85.42	96	14	0	963	1058	520	615	3e-14	79.8
XLOC_000433	NONGGOT007232.1	85.42	96	14	0	1285	1380	520	615	4e-14	79.8
XLOC_000435	NONGGOT000983.1	87.47	423	35	5	155	573	1923	1515	1e-112	404
XLOC_000435	NONGGOT000983.1	92.47	93	7	0	302	394	1437	1345	7e-30	129
XLOC_000437	NONGGOT003323.1	85.58	104	15	0	1301	1404	249	146	9e-17	87.7
XLOC_000439	NONGGOT020619.1	93.59	78	5	0	3	80	1057	980	8e-26	115
XLOC_000440	NONGGOT004130.1	93.33	30	2	0	177	206	603	632	0.0004	44.1
XLOC_000443	NONGGOT020369.1	100	23	0	0	197	219	3026	3048	4e-05	46.1
XLOC_000445	NONGGOT000536.1	86.09	115	15	1	12	126	323	210	4e-19	93.7
XLOC_000447	NONGGOT006758.1	91.05	190	14	1	359	545	2007	2196	3e-62	238
XLOC_000448	NONGGOT000076.1	95.81	167	7	0	254	420	290	456	5e-74	276
XLOC_000450	NONGGOT013213.1	91.67	144	12	0	414	557	411	268	3e-48	190
XLOC_000450	NONGGOT001117.1	94.21	121	7	0	996	1116	202	322	4e-46	184
XLOC_000451	NONGGOT001835.1	92.11	38	3	0	449	486	404	367	2e-06	52
XLOC_000452	NONGGOT012483.1	95.74	47	2	0	475	521	294	340	3e-14	77.8
XLOC_000453	NONGGOT015696.1	86.73	113	15	0	88	200	457	345	2e-22	105
XLOC_000456	NONGGOT001050.1	87.13	171	19	3	444	613	462	294	5e-33	141
XLOC_000457	NONGGOT015802.1	91.67	48	4	0	36	83	502	455	3e-10	63.9
XLOC_000458	NONGGOT016299.1	87.86	140	17	0	60	199	657	518	5e-34	143
XLOC_000460	NONGGOT001464.1	86.27	102	13	1	234	334	751	650	3e-16	83.8
XLOC_000460	NONGGOT001464.1	86.27	102	13	1	237	337	751	650	3e-16	83.8
XLOC_000461	NONGGOT003150.1	93.16	1477	76	10	11	1479	5533	4074	0	1994
XLOC_000461	NONGGOT003150.1	93.16	1477	76	10	11	1479	5533	4074	0	1994
XLOC_000461	NONGGOT003150.1	93.5	862	43	7	11	868	5533	4681	0	1174
XLOC_000461	NONGGOT003150.1	93.16	1477	76	10	11	1479	5533	4074	0	1994
XLOC_000461	NONGGOT003150.1	93.16	1477	76	10	11	1479	5533	4074	0	1994
XLOC_000461	NONGGOT003150.1	93.16	1477	76	10	11	1479	5533	4074	0	1994
XLOC_000462	NONGGOT003147.1	93.25	637	32	5	1	636	4332	3706	0	894
XLOC_000465	NONGGOT009754.1	86.75	249	33	0	2	250	1599	1847	9e-61	232
XLOC_000466	NONGGOT007839.1	88.75	329	32	2	377	700	568	240	8e-96	349
XLOC_000467	NONGGOT010558.1	96.55	29	1	0	1891	1919	11419	11447	3e-05	50.1
XLOC_000467	NONGGOT001065.1	94.59	148	7	1	1846	1993	213	67	4e-57	222
XLOC_000467	NONGGOT001065.1	95.41	414	18	1	1836	2249	481	69	0	662
XLOC_000467	NONGGOT001065.1	95.41	414	18	1	1836	2249	481	69	0	662
XLOC_000467	NONGGOT001065.1	95.43	416	18	1	1836	2251	481	67	0	666
XLOC_000467	NONGGOT001065.1	95.41	414	18	1	1836	2249	481	69	0	662
XLOC_000467	NONGGOT001065.1	95.41	414	18	1	1836	2249	481	69	0	662
XLOC_000467	NONGGOT001065.1	95.41	414	18	1	1836	2249	481	69	0	662
XLOC_000467	NONGGOT001065.1	95.41	414	18	1	1836	2249	481	69	0	662
XLOC_000467	NONGGOT001065.1	95.41	414	18	1	1836	2249	481	69	0	662
XLOC_000467	NONGGOT001065.1	95.41	414	18	1	1836	2249	481	69	0	662
XLOC_000467	NONGGOT001065.1	95.41	414	18	1	1836	2249	481	69	0	662
XLOC_000467	NONGGOT001065.1	95.41	414	18	1	1836	2249	481	69	0	662
XLOC_000467	NONGGOT001065.1	95.41	414	18	1	1836	2249	481	69	0	662
XLOC_000467	NONGGOT007232.1	96.08	51	2	0	230	280	615	565	1e-16	85.7
XLOC_000467	NONGGOT007232.1	96.08	51	2	0	230	280	615	565	3e-16	85.7
XLOC_000467	NONGGOT007232.1	96.08	51	2	0	230	280	615	565	2e-16	85.7
XLOC_000471	NONGGOT000107.1	100	57	0	0	2603	2659	527	583	4e-24	113
XLOC_000471	NONGGOT000107.1	100	57	0	0	339	395	527	583	8e-25	113
XLOC_000472	NONGGOT001070.1	97.6	125	3	0	462	586	208	84	2e-58	224
XLOC_000473	NONGGOT009770.1	100	23	0	0	2567	2589	226	204	0.0008	46.1
XLOC_000474	NONGGOT005904.1	94.74	38	2	0	1695	1732	90	127	3e-08	60
XLOC_000474	NONGGOT005904.1	94.74	38	2	0	1695	1732	90	127	3e-08	60
XLOC_000475	NONGGOT012452.1	97.37	38	1	0	782	819	1327	1364	6e-11	67.9
XLOC_000477	NONGGOT003205.1	88.12	261	31	0	84	344	463	203	4e-72	272
XLOC_000477	NONGGOT003205.1	88.12	261	31	0	84	344	463	203	5e-72	272
XLOC_000477	NONGGOT003205.1	88.12	261	31	0	84	344	463	203	8e-72	272
XLOC_000483	NONGGOT015362.1	90.39	229	22	0	564	792	814	586	2e-74	280
XLOC_000483	NONGGOT015362.1	90.39	229	22	0	564	792	814	586	2e-74	280
XLOC_000483	NONGGOT015362.1	90.39	229	22	0	564	792	814	586	2e-74	280
XLOC_000483	NONGGOT009264.1	87.98	233	25	1	195	427	542	313	2e-61	236
XLOC_000484	NONGGOT016959.1	100	46	0	0	1	46	79	124	3e-18	91.7
XLOC_000487	NONGGOT000087.1	88.85	269	27	2	43	310	1718	1984	3e-75	281
XLOC_000489	NONGGOT020131.1	100	29	0	0	4	32	3858	3886	3e-08	58
XLOC_000489	NONGGOT020131.1	100	29	0	0	4	32	3858	3886	5e-08	58
XLOC_000489	NONGGOT011958.1	88.33	257	29	1	720	976	6592	6847	1e-69	264
XLOC_000490	NONGGOT008828.1	89.87	79	8	0	474	552	504	426	5e-19	93.7
XLOC_000490	NONGGOT002208.1	86.14	267	33	2	1058	1323	323	60	3e-42	172
XLOC_000491	NONGGOT012492.1	89.58	259	24	2	345	603	332	77	1e-76	285
XLOC_000492	NONGGOT006768.1	96.3	27	1	0	365	391	90	64	0.0005	46.1
XLOC_000494	NONGGOT001111.1	94.55	110	6	0	310	419	369	260	2e-42	170
XLOC_000495	NONGGOT001111.1	95.6	159	7	0	153	311	260	102	5e-69	260
XLOC_000495	NONGGOT001111.1	96.2	158	6	0	1	158	243	86	5e-71	266
XLOC_000496	NONGGOT000150.1	94.55	110	6	0	147	256	251	360	3e-42	170
XLOC_000496	NONGGOT000150.1	95.92	98	4	0	88	185	263	360	6e-40	163
XLOC_000496	NONGGOT000150.1	94.5	109	6	0	81	189	252	360	1e-41	168
XLOC_000506	NONGGOT012492.1	86.67	240	31	1	366	605	306	68	9e-40	163
XLOC_000508	NONGGOT017705.1	88.5	113	13	0	177	289	1865	1753	3e-27	121
XLOC_000509	NONGGOT001147.1	93.87	310	18	1	38	346	310	1	2e-128	456
XLOC_000509	NONGGOT001147.1	93.87	310	18	1	748	1056	310	1	7e-128	456
XLOC_000509	NONGGOT001147.1	93.87	310	18	1	744	1052	310	1	8e-128	456
XLOC_000509	NONGGOT001147.1	93.87	310	18	1	290	598	310	1	5e-128	456
XLOC_000510	NONGGOT001148.1	95.8	143	6	0	556	698	217	75	9e-62	236
XLOC_000510	NONGGOT001148.1	95.8	143	6	0	919	1061	217	75	1e-61	236
XLOC_000510	NONGGOT001148.1	95.8	143	6	0	17	159	217	75	2e-62	236
XLOC_000512	NONGGOT000166.1	94.92	197	10	0	388	584	1156	1352	1e-84	311
XLOC_000512	NONGGOT000166.1	94.92	197	10	0	388	584	1156	1352	2e-84	311
XLOC_000512	NONGGOT000166.1	94.92	197	10	0	388	584	1156	1352	2e-84	311
XLOC_000512	NONGGOT000166.1	94.92	197	10	0	388	584	1156	1352	2e-84	311
XLOC_000512	NONGGOT000166.1	96.91	356	10	1	1	356	801	1155	2e-174	611
XLOC_000513	NONGGOT013856.1	100	39	0	0	170	208	54	16	1e-14	77.8
XLOC_000516	NONGGOT015634.1	93.88	49	3	0	199	247	897	849	3e-12	73.8
XLOC_000516	NONGGOT020660.1	96.49	57	2	0	3182	3238	1408	1352	2e-19	97.6
XLOC_000516	NONGGOT020660.1	96.49	57	2	0	3220	3276	1408	1352	2e-19	97.6
XLOC_000516	NONGGOT020660.1	96.49	57	2	0	2913	2969	1408	1352	2e-19	97.6
XLOC_000518	NONGGOT003270.1	88.89	171	18	1	1583	1752	203	373	1e-44	180
XLOC_000518	NONGGOT013089.1	87.04	54	7	0	168	221	350	297	2e-06	52
XLOC_000518	NONGGOT013332.1	90.48	42	4	0	299	340	3873	3914	2e-06	52
XLOC_000518	NONGGOT013332.1	90.48	42	4	0	299	340	3873	3914	2e-06	52
XLOC_000521	NONGGOT000183.1	100	29	0	0	1255	1283	532	560	8e-08	58
XLOC_000523	NONGGOT000087.1	90.04	261	25	1	4477	4736	1731	1991	3e-81	303
XLOC_000523	NONGGOT007403.1	88.65	282	30	1	975	1254	509	790	3e-80	299
XLOC_000523	NONGGOT007403.1	88.65	282	30	1	975	1254	509	790	4e-80	299
XLOC_000523	NONGGOT007403.1	88.65	282	30	1	975	1254	509	790	4e-80	299
XLOC_000523	NONGGOT007403.1	88.65	282	30	1	975	1254	509	790	3e-80	299
XLOC_000529	NONGGOT018467.1	94.12	119	7	0	30	148	352	470	5e-45	180
XLOC_000529	NONGGOT018467.1	94.12	119	7	0	30	148	352	470	8e-45	180
XLOC_000534	NONGGOT008563.1	94.74	57	3	0	9	65	706	650	3e-17	89.7
XLOC_000539	NONGGOT004734.1	98.21	56	1	0	328	383	569	624	4e-22	103
XLOC_000542	NONGGOT001214.1	96	225	9	0	258	482	225	1	1e-103	375
XLOC_000542	NONGGOT001214.1	95.56	225	10	0	258	482	225	1	3e-101	367
XLOC_000542	NONGGOT001214.1	96	225	9	0	258	482	225	1	1e-103	375
XLOC_000542	NONGGOT001214.1	96	225	9	0	258	482	225	1	9e-104	375
XLOC_000542	NONGGOT001214.1	95.89	219	9	0	258	476	225	7	3e-100	363
XLOC_000542	NONGGOT017700.1	100	21	0	0	91	111	1167	1147	0.0006	42.1
XLOC_000542	NONGGOT016289.1	90.74	54	5	0	278	331	905	958	2e-11	67.9
XLOC_000542	NONGGOT015061.1	91.89	37	3	0	13	49	157	193	5e-06	50.1
XLOC_000544	NONGGOT009150.1	90.12	81	8	0	1	81	743	663	6e-20	97.6
XLOC_000545	NONGGOT017942.1	96.15	26	1	0	258	283	925	950	0.0006	44.1
XLOC_000547	NONGGOT001241.1	95.07	223	9	2	64	284	898	676	3e-93	339
XLOC_000547	NONGGOT001241.1	96.3	324	12	0	798	1121	1660	1337	3e-155	547
XLOC_000547	NONGGOT001241.1	95.48	752	34	0	798	1549	1660	909	0	1221
XLOC_000547	NONGGOT001241.1	94.62	1097	50	5	798	1885	1660	564	0	1675
XLOC_000547	NONGGOT001242.1	95.93	761	24	4	421	1177	758	1	0	1237
XLOC_000547	NONGGOT001242.1	95.61	570	19	3	421	987	758	192	0	914
XLOC_000547	NONGGOT001242.1	95.61	570	19	3	421	987	758	192	0	914
XLOC_000547	NONGGOT001242.1	95.61	570	19	3	421	987	758	192	0	914
XLOC_000547	NONGGOT001242.1	95.61	570	19	3	421	987	758	192	0	914
XLOC_000547	NONGGOT009136.1	96.15	78	3	0	2	79	364	287	6e-30	131
XLOC_000547	NONGGOT009136.1	96.15	78	3	0	2	79	364	287	2e-30	131
XLOC_000549	NONGGOT000269.1	93.33	30	2	0	250	279	336	307	0.0003	44.1
XLOC_000553	NONGGOT008271.1	91.67	36	3	0	224	259	390	425	4e-05	48.1
XLOC_000562	NONGGOT004986.1	89.06	64	7	0	47	110	431	368	9e-13	71.9
XLOC_000564	NONGGOT011657.1	88.57	105	12	0	1838	1942	345	449	3e-24	113
XLOC_000565	NONGGOT014707.1	95.95	74	3	0	9	82	17	90	2e-27	123
XLOC_000565	NONGGOT014707.1	95.95	74	3	0	9	82	17	90	2e-27	123
XLOC_000566	NONGGOT000284.1	97.1	69	1	1	651	718	1	69	8e-25	113
XLOC_000568	NONGGOT001172.1	89.73	224	22	1	37	259	947	1170	4e-67	254
XLOC_000573	NONGGOT000308.1	100	62	0	0	157	218	775	836	4e-27	123
XLOC_000574	NONGGOT001295.1	94.31	281	15	1	952	1231	281	1	4e-105	381
XLOC_000574	NONGGOT001295.1	94.31	281	15	1	297	576	281	1	2e-105	381
XLOC_000574	NONGGOT001295.1	94.56	239	12	1	266	503	281	43	1e-87	321
XLOC_000574	NONGGOT001294.1	92.59	243	17	1	559	801	341	100	4e-90	331
XLOC_000574	NONGGOT001295.1	94.31	281	15	1	649	928	281	1	3e-105	381
XLOC_000574	NONGGOT001295.1	94.31	281	15	1	904	1183	281	1	4e-105	381
XLOC_000574	NONGGOT001295.1	94.31	281	15	1	802	1081	281	1	4e-105	381
XLOC_000574	NONGGOT001295.1	94.31	281	15	1	284	563	281	1	2e-105	381
XLOC_000574	NONGGOT001295.1	94.33	282	15	1	306	586	282	1	5e-106	383
XLOC_000574	NONGGOT016102.1	100	25	0	0	759	783	1844	1868	3e-05	50.1
XLOC_000574	NONGGOT016102.1	100	25	0	0	759	783	1844	1868	3e-05	50.1
XLOC_000574	NONGGOT016102.1	100	25	0	0	759	783	1844	1868	4e-05	50.1
XLOC_000574	NONGGOT001295.1	94.33	282	15	1	2498	2778	282	1	2e-105	383
XLOC_000574	NONGGOT001295.1	94.33	282	15	1	2465	2745	282	1	2e-105	383
XLOC_000574	NONGGOT001295.1	94.31	281	15	1	2213	2492	281	1	8e-105	381
XLOC_000574	NONGGOT001295.1	94.31	281	15	1	2246	2525	281	1	8e-105	381
XLOC_000574	NONGGOT001295.1	94.31	281	15	1	245	524	281	1	2e-105	381
XLOC_000578	NONGGOT011685.1	88.85	269	30	0	750	1018	810	542	3e-79	295
XLOC_000578	NONGGOT011685.1	88.85	269	30	0	750	1018	810	542	2e-79	295
XLOC_000579	NONGGOT001300.1	88.11	244	9	1	1	244	276	53	1e-76	283
XLOC_000580	NONGGOT016620.1	91.67	36	3	0	4	39	434	469	1e-05	48.1
XLOC_000583	NONGGOT020660.1	88	100	12	0	5	104	1630	1729	4e-22	103
XLOC_000587	NONGGOT000785.1	85.33	225	30	2	578	802	628	849	7e-42	170
XLOC_000587	NONGGOT000785.1	85.33	225	30	2	578	802	628	849	7e-42	170
XLOC_000587	NONGGOT000785.1	85.33	225	30	2	578	802	628	849	8e-42	170
XLOC_000587	NONGGOT000785.1	85.33	225	30	2	578	802	628	849	8e-42	170
XLOC_000587	NONGGOT000785.1	85.33	225	30	2	578	802	628	849	8e-42	170
XLOC_000588	NONGGOT012392.1	88.36	275	29	2	929	1203	1938	2209	1e-73	278
XLOC_000588	NONGGOT020437.1	89.71	272	27	1	3147	3417	1950	1679	3e-83	309
XLOC_000592	NONGGOT001321.1	94.71	208	10	1	137	343	417	210	3e-86	317
XLOC_000592	NONGGOT001321.1	94.71	208	10	1	137	343	417	210	1e-86	317
XLOC_000592	NONGGOT001322.1	91.32	311	23	2	344	650	454	144	3e-108	391
XLOC_000592	NONGGOT001321.1	94.71	208	10	1	137	343	417	210	2e-86	317
XLOC_000592	NONGGOT001321.1	94.71	208	10	1	117	323	417	210	2e-86	317
XLOC_000592	NONGGOT001321.1	94.71	208	10	1	50	256	417	210	1e-86	317
XLOC_000592	NONGGOT019571.1	84.58	253	25	3	1	252	179	418	6e-36	151
XLOC_000592	NONGGOT001322.1	91.32	311	23	2	379	685	454	144	3e-108	391
XLOC_000595	NONGGOT000345.1	95.38	195	9	0	58	252	1667	1861	9e-86	315
XLOC_000595	NONGGOT000345.1	95.38	195	9	0	128	322	1668	1862	5e-86	315
XLOC_000595	NONGGOT000345.1	95.36	194	9	0	128	321	1668	1861	4e-85	313
XLOC_000595	NONGGOT000345.1	94.97	199	10	0	206	404	1663	1861	1e-85	315
XLOC_000595	NONGGOT000345.1	95.9	536	21	1	1	536	1327	1861	0	839
XLOC_000598	NONGGOT011941.1	89.54	239	25	0	606	844	604	842	2e-73	276
XLOC_000601	NONGGOT004759.1	91.15	113	10	0	1927	2039	875	763	1e-33	145
XLOC_000603	NONGGOT001357.1	95.17	145	5	1	604	746	836	692	1e-58	226
XLOC_000603	NONGGOT001357.1	95.17	145	5	1	812	954	836	692	1e-58	226
XLOC_000603	NONGGOT001357.1	95.17	145	5	1	604	746	836	692	1e-58	226
XLOC_000603	NONGGOT001357.1	95.17	145	5	1	812	954	836	692	2e-58	226
XLOC_000603	NONGGOT001357.1	95.27	148	5	1	598	743	839	692	2e-60	232
XLOC_000603	NONGGOT001357.1	95.17	145	5	1	63	205	836	692	9e-59	226
XLOC_000603	NONGGOT001131.1	89.22	167	16	1	1	165	240	74	9e-46	182
XLOC_000608	NONGGOT001367.1	95.45	44	2	0	644	687	105	62	3e-12	71.9
XLOC_000609	NONGGOT017474.1	85.04	274	35	2	536	805	809	538	3e-31	137
XLOC_000609	NONGGOT017474.1	85.04	274	35	2	536	805	809	538	3e-31	137
XLOC_000612	NONGGOT011182.1	90.04	542	50	1	71	612	1298	761	0	644
XLOC_000612	NONGGOT011182.1	90.04	542	50	1	71	612	1298	761	0	644
XLOC_000612	NONGGOT011182.1	90.04	542	50	1	71	612	1298	761	0	644
XLOC_000612	NONGGOT011182.1	90.04	542	50	1	71	612	1298	761	0	644
XLOC_000613	NONGGOT006784.1	85	80	12	0	304	383	731	652	6e-10	63.9
XLOC_000614	NONGGOT004806.1	98	50	1	0	1	50	1126	1175	1e-18	91.7
XLOC_000621	NONGGOT000517.1	88.37	43	5	0	29	71	404	446	0.0003	46.1
XLOC_000621	NONGGOT000517.1	88.37	43	5	0	29	71	404	446	0.0003	46.1
XLOC_000621	NONGGOT000517.1	88.37	43	5	0	29	71	404	446	0.0002	46.1
XLOC_000624	NONGGOT020660.1	91.89	37	3	0	676	712	348	384	1e-05	50.1
XLOC_000624	NONGGOT020660.1	89.66	87	9	0	611	697	348	434	3e-21	101
XLOC_000624	NONGGOT010603.1	86.13	238	31	1	710	947	43	278	1e-39	163
XLOC_000624	NONGGOT020660.1	90.11	91	9	0	297	387	348	438	7e-24	109
XLOC_000626	NONGGOT020487.1	85.57	201	28	1	132	332	804	1003	4e-39	161
XLOC_000628	NONGGOT020099.1	96.25	80	3	0	3	82	1016	1095	4e-31	135
XLOC_000628	NONGGOT001396.1	93.93	214	13	0	605	818	597	384	2e-87	321
XLOC_000628	NONGGOT020099.1	96.25	80	3	0	3	82	1016	1095	2e-31	135
XLOC_000628	NONGGOT001396.1	94.38	178	10	0	1	178	561	384	2e-73	274
XLOC_000628	NONGGOT001396.1	94.38	178	10	0	1	178	561	384	4e-73	274
XLOC_000628	NONGGOT001396.1	95.39	152	7	0	1	152	561	410	8e-65	246
XLOC_000631	NONGGOT018631.1	96.43	28	1	0	1	28	85	112	5e-05	48.1
XLOC_000631	NONGGOT018631.1	96.43	28	1	0	1	28	85	112	6e-05	48.1
XLOC_000632	NONGGOT012492.1	87.17	265	33	1	3541	3804	320	56	2e-64	248
XLOC_000634	NONGGOT001410.1	95.01	361	17	1	332	691	1090	730	1e-146	517
XLOC_000635	NONGGOT001410.1	94.93	138	5	1	123	258	377	240	4e-55	212
XLOC_000636	NONGGOT000087.1	92.79	111	7	1	650	759	1739	1849	2e-35	149
XLOC_000636	NONGGOT000087.1	92.79	111	7	1	900	1009	1739	1849	2e-35	149
XLOC_000636	NONGGOT007403.1	86.67	270	26	3	633	901	775	515	6e-54	210
XLOC_000636	NONGGOT007403.1	86.67	270	26	3	649	917	775	515	7e-54	210
XLOC_000636	NONGGOT007403.1	86.67	270	26	3	1034	1302	775	515	9e-54	210
XLOC_000643	NONGGOT001476.1	93.81	113	6	1	69	180	148	260	2e-39	161
XLOC_000646	NONGGOT020740.1	100	51	0	0	4	54	3568	3618	2e-21	101
XLOC_000648	NONGGOT000479.1	96.63	89	3	0	290	378	2603	2691	5e-37	153
XLOC_000648	NONGGOT000479.1	96.67	90	3	0	294	383	2603	2692	1e-37	155
XLOC_000648	NONGGOT000479.1	96.63	89	3	0	208	296	2603	2691	4e-37	153
XLOC_000650	NONGGOT020627.1	93.75	32	2	0	68	99	559	528	5e-05	48.1
XLOC_000650	NONGGOT012939.1	96.55	29	1	0	522	550	218	246	1e-05	50.1
XLOC_000651	NONGGOT016299.1	94.53	128	7	0	211	338	521	648	8e-51	198
XLOC_000655	NONGGOT001491.1	96.46	226	6	1	358	581	592	367	2e-92	337
XLOC_000655	NONGGOT001491.1	96.3	216	6	1	358	571	592	377	2e-86	317
XLOC_000656	NONGGOT001945.1	88.5	226	25	1	1020	1245	2998	3222	1e-60	234
XLOC_000657	NONGGOT010227.1	93.1	58	4	0	383	440	767	824	7e-16	83.8
XLOC_000658	NONGGOT009264.1	89.26	270	24	2	308	577	587	323	2e-79	295
XLOC_000661	NONGGOT008404.1	85.86	99	14	0	36	134	880	978	1e-16	85.7
XLOC_000663	NONGGOT009336.1	97.44	39	1	0	1	39	519	481	4e-12	69.9
XLOC_000664	NONGGOT001072.1	100	25	0	0	164	188	41	17	3e-06	50.1
XLOC_000672	NONGGOT018053.1	90.48	42	4	0	13	54	303	262	1e-06	52
XLOC_000674	NONGGOT010781.1	97.14	35	1	0	518	552	57	23	2e-09	61.9
XLOC_000675	NONGGOT014978.1	83.33	78	13	0	113	190	37	114	1e-06	52
XLOC_000676	NONGGOT015099.1	86.86	137	17	1	1597	1732	452	316	1e-26	121
XLOC_000676	NONGGOT015099.1	86.86	137	17	1	1597	1732	452	316	1e-26	121
XLOC_000676	NONGGOT017571.1	84.83	211	28	1	2191	2397	2141	2351	6e-39	163
XLOC_000677	NONGGOT020752.1	90	50	5	0	573	622	149	100	9e-09	60
XLOC_000679	NONGGOT001585.1	91.7	253	20	1	735	987	990	1241	8e-89	327
XLOC_000680	NONGGOT015655.1	87.5	128	16	0	444	571	450	577	1e-28	127
XLOC_000680	NONGGOT015655.1	87.5	128	16	0	444	571	450	577	1e-28	127
XLOC_000680	NONGGOT015655.1	87.5	128	16	0	444	571	450	577	1e-28	127
XLOC_000682	NONGGOT006341.1	96.3	27	1	0	761	787	374	400	0.0002	46.1
XLOC_000689	NONGGOT003650.1	88.4	250	29	0	11	260	493	244	9e-71	266
XLOC_000690	NONGGOT018375.1	93.22	59	2	2	180	236	157	99	4e-11	69.9
XLOC_000694	NONGGOT019390.1	100	24	0	0	159	182	525	548	2e-05	48.1
XLOC_000695	NONGGOT003782.1	100	28	0	0	76	103	59	86	8e-08	56
XLOC_000696	NONGGOT000728.1	91.81	757	47	5	39	793	744	1	0	989
XLOC_000696	NONGGOT000728.1	93.19	279	15	1	497	771	387	109	2e-111	400
XLOC_000696	NONGGOT000728.1	91.98	823	48	5	282	1099	810	1	0	1094
XLOC_000696	NONGGOT000728.1	92.35	823	48	5	282	1102	810	1	0	1112
XLOC_000697	NONGGOT016040.1	89.25	214	23	0	564	777	2174	2387	3e-63	242
XLOC_000697	NONGGOT001643.1	94.79	211	11	0	1198	1408	401	191	4e-90	331
XLOC_000698	NONGGOT000723.1	95.27	148	7	0	1	148	175	28	2e-62	238
XLOC_000699	NONGGOT009262.1	87.78	90	11	0	161	250	1	90	2e-18	91.7
XLOC_000699	NONGGOT009262.1	87.78	90	11	0	161	250	1	90	2e-18	91.7
XLOC_000699	NONGGOT009262.1	87.78	90	11	0	161	250	1	90	4e-18	91.7
XLOC_000702	NONGGOT006292.1	89.13	230	25	0	258	487	2	231	4e-68	258
XLOC_000705	NONGGOT002205.1	92.55	94	7	0	76	169	1048	955	3e-30	131
XLOC_000707	NONGGOT000713.1	93.15	248	13	1	238	481	323	76	8e-98	355
XLOC_000707	NONGGOT000713.1	93.4	288	15	1	233	516	323	36	7e-117	418
XLOC_000707	NONGGOT000713.1	93.09	362	21	1	436	793	379	18	2e-146	517
XLOC_000710	NONGGOT004269.1	97.96	49	1	0	728	776	2872	2824	1e-17	89.7
XLOC_000711	NONGGOT014908.1	88.98	118	13	0	193	310	387	270	3e-30	131
XLOC_000711	NONGGOT014908.1	88.98	118	13	0	193	310	387	270	4e-30	131
XLOC_000716	NONGGOT006758.1	92.5	120	9	0	331	450	2110	1991	1e-40	167
XLOC_000716	NONGGOT006758.1	92.5	120	9	0	331	450	2110	1991	1e-40	167
XLOC_000722	NONGGOT010231.1	79.34	513	88	7	4666	5172	3272	3772	7e-33	143
XLOC_000724	NONGGOT000689.1	94.29	333	19	0	1	333	333	1	1e-143	509
XLOC_000724	NONGGOT012099.1	100	26	0	0	3	28	166	141	5e-06	52
XLOC_000725	NONGGOT003606.1	94.41	161	8	1	92	251	4272	4112	3e-63	240
XLOC_000726	NONGGOT000688.1	90.2	51	2	1	590	640	104	57	4e-08	58
XLOC_000727	NONGGOT016299.1	92.57	175	13	0	72	246	722	548	2e-64	244
XLOC_000729	NONGGOT000686.1	95.88	437	17	1	172	608	436	1	0	716
XLOC_000729	NONGGOT000686.1	92.94	85	5	1	412	496	84	1	7e-25	113
XLOC_000731	NONGGOT000684.1	91.24	217	12	2	1	214	797	585	1e-73	274
XLOC_000746	NONGGOT004793.1	82.52	143	21	2	343	483	509	369	9e-13	73.8
XLOC_000748	NONGGOT000642.1	93.67	221	12	1	2	220	320	100	5e-88	321
XLOC_000749	NONGGOT000641.1	95.43	197	7	2	109	304	279	84	3e-82	303
XLOC_000750	NONGGOT000636.1	95.5	289	12	1	1	289	426	139	6e-130	462
XLOC_000751	NONGGOT010428.1	84.62	65	10	0	219	283	861	797	6e-06	50.1
XLOC_000756	NONGGOT017322.1	89.77	88	9	0	46	133	224	311	2e-22	103
XLOC_000759	NONGGOT001225.1	86.21	116	16	0	556	671	269	154	4e-21	103
XLOC_000760	NONGGOT013165.1	86.38	213	28	1	982	1194	525	314	8e-46	184
XLOC_000761	NONGGOT008817.1	91.43	35	3	0	211	245	165	131	0.0002	46.1
XLOC_000761	NONGGOT001551.1	93.1	145	10	0	173	317	520	376	9e-54	208
XLOC_000765	NONGGOT000621.1	93.94	33	2	0	583	615	1	33	9e-06	50.1
XLOC_000769	NONGGOT013812.1	94.55	55	3	0	51	105	564	510	1e-16	85.7
XLOC_000769	NONGGOT013812.1	94.55	55	3	0	51	105	564	510	1e-16	85.7
XLOC_000777	NONGGOT008270.1	89.11	101	11	0	2007	2107	517	617	2e-24	113
XLOC_000778	NONGGOT014745.1	90.79	76	6	1	143	217	192	267	1e-16	87.7
XLOC_000778	NONGGOT004446.1	79.02	305	64	0	11	315	4298	3994	6e-20	97.6
XLOC_000778	NONGGOT004446.1	79.02	305	64	0	11	315	4298	3994	1e-19	97.6
XLOC_000779	NONGGOT004384.1	82.89	228	34	2	47	274	2065	1843	7e-31	133
XLOC_000779	NONGGOT004384.1	82.89	228	34	2	47	274	2065	1843	8e-31	133
XLOC_000786	NONGGOT014985.1	89.22	102	10	1	25	125	136	35	4e-23	107
XLOC_000793	NONGGOT008051.1	85.54	83	12	0	112	194	2667	2585	3e-12	69.9
XLOC_000794	NONGGOT016357.1	91.49	141	11	1	26	165	1284	1144	3e-44	176
XLOC_000796	NONGGOT016378.1	87.12	264	33	1	68	331	355	93	6e-65	246
XLOC_000796	NONGGOT016378.1	87.12	264	33	1	68	331	355	93	7e-65	246
XLOC_000797	NONGGOT020437.1	90.36	280	27	0	2901	3180	1958	1679	1e-92	341
XLOC_000797	NONGGOT020437.1	90.36	280	27	0	2901	3180	1958	1679	2e-92	341
XLOC_000800	NONGGOT001799.1	90.48	42	4	0	793	834	271	312	1e-05	52
XLOC_000802	NONGGOT011883.1	87.41	135	17	0	109	243	71	205	9e-31	133
XLOC_000804	NONGGOT001782.1	100	104	0	0	1193	1296	274	377	3e-52	206
XLOC_000805	NONGGOT009009.1	93.44	122	8	0	1930	2051	2029	1908	5e-44	178
XLOC_000806	NONGGOT017322.1	92.68	41	3	0	266	306	570	530	8e-08	58
XLOC_000806	NONGGOT017322.1	92.68	41	3	0	266	306	570	530	9e-08	58
XLOC_000806	NONGGOT017322.1	92.68	41	3	0	266	306	570	530	9e-08	58
XLOC_000806	NONGGOT017322.1	92.68	41	3	0	266	306	570	530	1e-07	58
XLOC_000807	NONGGOT009754.1	88.89	270	30	0	1687	1956	1597	1866	2e-79	297
XLOC_000808	NONGGOT007403.1	84.87	271	31	2	1953	2214	521	790	7e-54	212
XLOC_000813	NONGGOT004881.1	91.78	73	6	0	206	278	1335	1407	2e-20	97.6
XLOC_000814	NONGGOT017066.1	100	24	0	0	449	472	223	246	6e-05	48.1
XLOC_000815	NONGGOT001759.1	94.94	158	8	0	474	631	3011	3168	5e-66	250
XLOC_000817	NONGGOT018108.1	84.34	83	13	0	137	219	198	116	3e-09	61.9
XLOC_000818	NONGGOT019921.1	89.19	148	15	1	226	372	927	1074	7e-39	159
XLOC_000822	NONGGOT006130.1	88.79	116	13	0	2468	2583	377	262	2e-28	127
XLOC_000825	NONGGOT017617.1	98.04	51	1	0	6	56	476	526	2e-18	93.7
XLOC_000826	NONGGOT011048.1	89.66	87	7	1	960	1044	782	696	5e-19	95.6
XLOC_000830	NONGGOT010603.1	87.35	253	29	1	828	1077	263	11	5e-64	244
XLOC_000830	NONGGOT009264.1	90	230	17	2	2636	2865	326	549	5e-70	266
XLOC_000830	NONGGOT002691.1	93.06	72	5	0	278	349	2035	2106	3e-21	103
XLOC_000830	NONGGOT009264.1	90	230	17	2	1615	1844	326	549	4e-70	266
XLOC_000830	NONGGOT009264.1	90	230	17	2	834	1063	326	549	3e-70	266
XLOC_000831	NONGGOT016040.1	87.45	263	32	1	1576	1838	2441	2180	3e-66	252
XLOC_000835	NONGGOT002386.1	88.76	267	30	0	1419	1685	757	491	4e-78	291
XLOC_000837	NONGGOT013236.1	91.78	73	6	0	9	81	320	248	2e-20	97.6
XLOC_000837	NONGGOT003432.1	95.24	42	2	0	92	133	1273	1232	8e-11	67.9
XLOC_000843	NONGGOT005978.1	91.3	46	4	0	1553	1598	3880	3835	2e-08	60
XLOC_000847	NONGGOT009872.1	90.87	219	12	1	106	316	201	419	7e-76	281
XLOC_000848	NONGGOT008911.1	100	22	0	0	177	198	902	881	0.0006	44.1
XLOC_000851	NONGGOT009854.1	91.87	332	22	2	25	354	215	543	1e-121	434
XLOC_000853	NONGGOT006283.1	94.29	70	4	0	1	70	15	84	2e-23	107
XLOC_000858	NONGGOT014589.1	90.35	228	20	2	3300	3525	599	826	1e-68	262
XLOC_000858	NONGGOT014589.1	90.35	228	20	2	2823	3048	599	826	9e-69	262
XLOC_000858	NONGGOT014589.1	90.35	228	20	2	3639	3864	599	826	1e-68	262
XLOC_000858	NONGGOT016299.1	91.51	271	21	1	9869	10139	789	521	3e-86	321
XLOC_000858	NONGGOT017561.1	91.26	103	9	0	1351	1453	946	844	2e-30	133
XLOC_000858	NONGGOT017561.1	91.26	103	9	0	1774	1876	946	844	2e-30	133
XLOC_000859	NONGGOT010314.1	88.52	244	27	1	3549	3792	517	759	4e-66	254
XLOC_000862	NONGGOT009509.1	95.83	48	1	1	236	283	685	639	1e-12	71.9
XLOC_000862	NONGGOT007920.1	90.7	43	4	0	409	451	262	220	4e-07	54
XLOC_000866	NONGGOT006049.1	87.66	154	10	2	2691	2835	261	414	5e-36	153
XLOC_000866	NONGGOT006049.1	87.66	154	10	2	2674	2818	261	414	5e-36	153
XLOC_000867	NONGGOT017857.1	83.62	116	13	2	100	213	965	1076	3e-12	71.9
XLOC_000868	NONGGOT019161.1	92.31	104	7	1	112	214	386	283	4e-31	135
XLOC_000868	NONGGOT019121.1	91.78	219	18	0	1381	1599	783	1001	3e-78	291
XLOC_000869	NONGGOT017643.1	96.15	26	1	0	462	487	56	81	0.0005	44.1
XLOC_000870	NONGGOT005186.1	85.05	408	39	2	546	950	1080	1468	2e-95	349
XLOC_000870	NONGGOT005186.1	85.05	408	39	2	523	927	1080	1468	2e-95	349
XLOC_000871	NONGGOT017509.1	88.33	60	7	0	136	195	113	54	2e-09	63.9
XLOC_000879	NONGGOT007694.1	95.03	322	10	2	851	1172	9	324	4e-142	504
XLOC_000881	NONGGOT018693.1	88.76	249	26	1	408	656	965	719	1e-61	236
XLOC_000882	NONGGOT020369.1	97.37	38	1	0	1	38	94	57	7e-11	67.9
XLOC_000885	NONGGOT005414.1	94.74	38	2	0	1259	1296	257	294	2e-08	60
XLOC_000886	NONGGOT000907.1	84.92	484	60	4	1525	1999	292	771	1e-100	367
XLOC_000886	NONGGOT000907.1	84.92	484	60	4	1523	1997	292	771	1e-100	367
XLOC_000887	NONGGOT009608.1	95.39	1063	45	3	527	1586	1409	348	0	1697
XLOC_000888	NONGGOT009609.1	92.29	402	30	1	105	506	874	474	2e-154	543
XLOC_000889	NONGGOT016299.1	90.48	252	21	1	881	1132	769	521	3e-67	256
XLOC_000890	NONGGOT003236.1	90.7	86	8	0	8	93	243	328	6e-23	107
XLOC_000890	NONGGOT003236.1	92.21	77	6	0	3	79	252	328	1e-22	105
XLOC_000890	NONGGOT011048.1	91.53	59	5	0	1	59	1668	1726	2e-14	77.8
XLOC_000890	NONGGOT013553.1	89.84	246	25	0	476	721	605	850	2e-77	289
XLOC_000890	NONGGOT009016.1	91.23	57	5	0	352	408	1041	1097	4e-13	73.8
XLOC_000890	NONGGOT014986.1	100	21	0	0	167	187	238	258	0.0007	42.1
XLOC_000890	NONGGOT003936.1	96.43	28	1	0	561	588	1	28	4e-05	48.1
XLOC_000890	NONGGOT003936.1	96.43	28	1	0	585	612	1	28	4e-05	48.1
XLOC_000891	NONGGOT010090.1	88.89	90	10	0	309	398	38	127	8e-21	99.6
XLOC_000893	NONGGOT009813.1	100	35	0	0	867	901	717	751	2e-11	69.9
XLOC_000893	NONGGOT016083.1	86.96	46	6	0	23	68	1973	1928	0.001	44.1
XLOC_000893	NONGGOT009813.1	100	35	0	0	546	580	717	751	1e-11	69.9
XLOC_000893	NONGGOT012392.1	86.92	260	30	3	1542	1798	1940	2198	2e-57	224
XLOC_000893	NONGGOT012392.1	86.92	260	30	3	1777	2033	1940	2198	2e-57	224
XLOC_000893	NONGGOT012392.1	86.92	260	30	3	1698	1954	1940	2198	2e-57	224
XLOC_000893	NONGGOT012392.1	86.92	260	30	3	1693	1949	1940	2198	2e-57	224
XLOC_000893	NONGGOT012392.1	86.92	260	30	3	1385	1641	1940	2198	2e-57	224
XLOC_000893	NONGGOT009185.1	90.91	33	3	0	228	260	37	5	0.0009	42.1
XLOC_000893	NONGGOT012392.1	86.92	260	30	3	1652	1908	1940	2198	2e-57	224
XLOC_000893	NONGGOT012392.1	86.92	260	30	3	1554	1810	1940	2198	2e-57	224
XLOC_000893	NONGGOT012392.1	86.92	260	30	3	1636	1892	1940	2198	2e-57	224
XLOC_000893	NONGGOT012392.1	86.92	260	30	3	1626	1882	1940	2198	2e-57	224
XLOC_000893	NONGGOT012392.1	86.92	260	30	3	1531	1787	1940	2198	2e-57	224
XLOC_000893	NONGGOT012392.1	86.92	260	30	3	1535	1791	1940	2198	2e-57	224
XLOC_000893	NONGGOT012392.1	86.92	260	30	3	1165	1421	1940	2198	2e-57	224
XLOC_000893	NONGGOT012392.1	86.92	260	30	3	847	1103	1940	2198	1e-57	224
XLOC_000894	NONGGOT005364.1	87.93	58	7	0	425	482	1535	1592	7e-09	60
XLOC_000895	NONGGOT008431.1	91.6	119	10	0	801	919	349	231	9e-38	157
XLOC_000895	NONGGOT008431.1	91.6	119	10	0	596	714	349	231	7e-38	157
XLOC_000896	NONGGOT016755.1	84.31	102	16	0	375	476	210	109	1e-13	75.8
XLOC_000898	NONGGOT009607.1	87.72	57	7	0	961	1017	296	352	7e-08	58
XLOC_000898	NONGGOT009607.1	87.72	57	7	0	564	620	296	352	5e-08	58
XLOC_000898	NONGGOT009607.1	87.72	57	7	0	550	606	296	352	5e-08	58
XLOC_000900	NONGGOT007902.1	86.57	283	27	1	997	1268	136	418	2e-45	182
XLOC_000900	NONGGOT007902.1	86.57	283	27	1	726	997	136	418	1e-45	182
XLOC_000904	NONGGOT000329.1	88.93	262	29	0	548	809	1612	1351	2e-77	289
XLOC_000907	NONGGOT009377.1	93.57	140	5	3	28	164	1	139	9e-47	184
XLOC_000908	NONGGOT000852.1	90.2	51	5	0	536	586	580	530	2e-09	61.9
XLOC_000909	NONGGOT005554.1	100	30	0	0	305	334	319	290	1e-08	60
XLOC_000909	NONGGOT005554.1	100	30	0	0	305	334	319	290	1e-08	60
XLOC_000915	NONGGOT002041.1	90.91	44	3	1	18	60	155	112	7e-05	48.1
XLOC_000917	NONGGOT010925.1	88.37	43	5	0	267	309	290	332	0.0001	46.1
XLOC_000917	NONGGOT008503.1	91.43	35	3	0	325	359	154	120	0.0001	46.1
XLOC_000917	NONGGOT010925.1	88.37	43	5	0	861	903	290	332	0.0003	46.1
XLOC_000917	NONGGOT010925.1	88.37	43	5	0	195	237	290	332	0.0002	46.1
XLOC_000917	NONGGOT014133.1	84.62	65	10	0	1041	1105	682	746	2e-05	50.1
XLOC_000919	NONGGOT009405.1	91.8	1390	94	8	62	1434	43	1429	0	1788
XLOC_000920	NONGGOT009408.1	95.56	135	6	0	1	135	94	228	6e-57	220
XLOC_000920	NONGGOT009408.1	96.88	128	4	0	84	211	360	487	1e-57	222
XLOC_000920	NONGGOT009408.1	96.88	128	4	0	62	189	360	487	1e-57	222
XLOC_000920	NONGGOT009408.1	96.88	128	4	0	14	141	360	487	1e-57	222
XLOC_000921	NONGGOT000140.1	92.86	70	3	2	515	582	863	932	6e-16	83.8
XLOC_000922	NONGGOT016659.1	93.62	47	1	1	137	181	1643	1597	2e-10	63.9
XLOC_000922	NONGGOT010374.1	85.56	277	31	6	978	1251	771	501	8e-48	190
XLOC_000922	NONGGOT018725.1	87.1	62	8	0	281	342	1047	1108	3e-08	60
XLOC_000922	NONGGOT018725.1	87.1	62	8	0	189	250	1047	1108	3e-08	60
XLOC_000926	NONGGOT019161.1	87.55	249	27	3	181	427	501	255	1e-58	226
XLOC_000926	NONGGOT019161.1	86.64	277	33	3	380	654	529	255	3e-61	234
XLOC_000928	NONGGOT016474.1	86.96	69	9	0	388	456	84	16	1e-10	65.9
XLOC_000929	NONGGOT019675.1	89	100	9	1	124	223	158	61	1e-22	105
XLOC_000930	NONGGOT009444.1	89.61	77	8	0	143	219	372	448	3e-18	89.7
XLOC_000931	NONGGOT005770.1	100	22	0	0	402	423	227	248	0.0007	44.1
XLOC_000936	NONGGOT017607.1	96.05	76	3	0	856	931	1159	1084	7e-29	127
XLOC_000936	NONGGOT017607.1	96.05	76	3	0	886	961	1159	1084	7e-29	127
XLOC_000936	NONGGOT017607.1	96.05	76	3	0	653	728	1159	1084	5e-29	127
XLOC_000936	NONGGOT018411.1	92.92	212	6	3	1108	1310	1659	1448	1e-77	289
XLOC_000936	NONGGOT017607.1	96.05	76	3	0	1697	1772	1159	1084	1e-28	127
XLOC_000938	NONGGOT010456.1	96.56	262	4	1	251	512	1226	970	3e-113	406
XLOC_000939	NONGGOT009264.1	89	100	11	0	438	537	313	412	2e-24	111
XLOC_000939	NONGGOT009264.1	89	100	11	0	335	434	313	412	2e-24	111
XLOC_000941	NONGGOT013751.1	86.92	107	10	1	64	170	50	152	2e-20	99.6
XLOC_000941	NONGGOT015213.1	94.74	38	2	0	9	46	67	30	1e-08	60
XLOC_000942	NONGGOT003482.1	92.16	51	4	0	405	455	1060	1010	1e-11	69.9
XLOC_000942	NONGGOT003482.1	92.16	51	4	0	495	545	1060	1010	1e-11	69.9
XLOC_000944	NONGGOT009266.1	85.29	102	15	0	271	372	441	340	7e-16	83.8
XLOC_000944	NONGGOT018273.1	88	75	9	0	518	592	482	408	5e-14	77.8
XLOC_000944	NONGGOT009266.1	85.29	102	15	0	367	468	441	340	8e-16	83.8
XLOC_000945	NONGGOT007520.1	92.63	190	14	0	429	618	1017	828	1e-60	232
XLOC_000947	NONGGOT003652.1	89.57	230	17	3	954	1179	481	255	8e-57	220
XLOC_000949	NONGGOT006698.1	97.3	37	1	0	264	300	2389	2353	1e-10	65.9
XLOC_000950	NONGGOT007902.1	98.1	105	2	0	1284	1388	141	245	2e-48	192
XLOC_000950	NONGGOT007902.1	98.1	105	2	0	1489	1593	141	245	2e-48	192
XLOC_000951	NONGGOT003236.1	88.66	97	11	0	308	404	337	241	4e-22	105
XLOC_000954	NONGGOT010459.1	94.17	103	6	0	5	107	141	243	3e-38	157
XLOC_000958	NONGGOT016299.1	93.68	269	16	1	3849	4116	789	521	2e-107	391
XLOC_000960	NONGGOT019018.1	96.77	31	1	0	4	34	1148	1118	2e-07	54
XLOC_000962	NONGGOT020382.1	86.57	216	29	0	321	536	257	42	1e-50	198
XLOC_000963	NONGGOT010251.1	84.51	71	10	1	98	168	103	172	6e-05	46.1
XLOC_000963	NONGGOT010251.1	84.51	71	10	1	67	137	103	172	5e-05	46.1
XLOC_000964	NONGGOT010499.1	100	60	0	0	365	424	629	570	8e-27	119
XLOC_000965	NONGGOT017715.1	100	38	0	0	1	38	204	241	1e-13	75.8
XLOC_000968	NONGGOT000234.1	90.48	42	4	0	753	794	987	1028	4e-06	52
XLOC_000969	NONGGOT016299.1	95.08	264	13	0	11901	12164	526	789	5e-116	420
XLOC_000969	NONGGOT016299.1	95.08	264	13	0	12033	12296	526	789	5e-116	420
XLOC_000969	NONGGOT016299.1	95.08	264	13	0	11824	12087	526	789	5e-116	420
XLOC_000970	NONGGOT003959.1	100	21	0	0	40	60	814	794	0.0007	42.1
XLOC_000971	NONGGOT009508.1	91.89	74	5	1	745	818	788	860	6e-18	91.7
XLOC_000974	NONGGOT012885.1	83.61	122	20	0	574	695	848	969	8e-16	83.8
XLOC_000974	NONGGOT012885.1	83.61	122	20	0	743	864	848	969	1e-15	83.8
XLOC_000974	NONGGOT012885.1	83.61	122	20	0	599	720	848	969	9e-16	83.8
XLOC_000974	NONGGOT012885.1	83.61	122	20	0	714	835	848	969	1e-15	83.8
XLOC_000974	NONGGOT019701.1	91.11	45	4	0	688	732	2001	2045	5e-08	58
XLOC_000974	NONGGOT012885.1	83.61	122	20	0	615	736	848	969	9e-16	83.8
XLOC_000975	NONGGOT004465.1	89.58	48	4	1	1776	1823	6	52	0.0002	48.1
XLOC_000977	NONGGOT018478.1	93.33	30	2	0	186	215	2196	2167	0.0003	44.1
XLOC_000977	NONGGOT018478.1	93.33	30	2	0	168	197	2196	2167	0.0002	44.1
XLOC_000977	NONGGOT018478.1	93.33	30	2	0	84	113	2196	2167	0.0002	44.1
XLOC_000977	NONGGOT012084.1	92.31	65	5	0	98	162	1699	1763	1e-17	89.7
XLOC_000981	NONGGOT019598.1	97.67	43	1	0	184	226	66	24	1e-14	77.8
XLOC_000989	NONGGOT012492.1	87.06	170	21	1	916	1085	145	313	4e-37	155
XLOC_000990	NONGGOT015961.1	93.2	147	10	0	833	979	125	271	2e-54	212
XLOC_000990	NONGGOT015961.1	91.71	181	15	0	1034	1214	125	305	1e-62	240
XLOC_000992	NONGGOT007215.1	89.58	96	10	0	788	883	1259	1164	6e-24	111
XLOC_000992	NONGGOT001901.1	88.64	273	31	0	563	835	631	359	2e-79	295
XLOC_000992	NONGGOT007215.1	89.58	96	10	0	731	826	1259	1164	5e-24	111
XLOC_000992	NONGGOT001901.1	88.64	273	31	0	389	661	631	359	2e-79	295
XLOC_000992	NONGGOT001901.1	88.64	273	31	0	282	554	631	359	2e-79	295
XLOC_000994	NONGGOT017630.1	100	24	0	0	204	227	400	377	2e-05	48.1
XLOC_000994	NONGGOT014304.1	97.5	40	1	0	1	40	1111	1072	1e-12	71.9
XLOC_000994	NONGGOT017630.1	100	24	0	0	291	314	400	377	2e-05	48.1
XLOC_000995	NONGGOT001945.1	88	225	27	0	90	314	2998	3222	7e-61	232
XLOC_000996	NONGGOT001156.1	87.91	91	11	0	2	92	408	318	2e-18	93.7
XLOC_001001	NONGGOT020163.1	86.89	267	30	3	1139	1402	2935	3199	7e-60	232
XLOC_001001	NONGGOT020163.1	86.89	267	30	3	1517	1780	2935	3199	8e-60	232
XLOC_001002	NONGGOT013369.1	87.16	109	14	0	475	583	516	408	5e-22	105
XLOC_001003	NONGGOT015501.1	97.83	46	1	0	2	47	797	752	3e-15	83.8
XLOC_001004	NONGGOT017615.1	85.85	106	15	0	41	146	574	679	1e-18	91.7
XLOC_001005	NONGGOT019161.1	87.06	255	33	0	7	261	276	530	7e-64	244
XLOC_001006	NONGGOT000163.1	87.75	253	27	3	878	1129	451	700	1e-60	234
XLOC_001008	NONGGOT003021.1	100	28	0	0	84	111	235	208	1e-07	56
XLOC_001016	NONGGOT009451.1	86.42	162	21	1	441	602	2459	2299	1e-32	139
XLOC_001020	NONGGOT015363.1	86.75	166	19	1	896	1061	393	555	6e-36	151
XLOC_001020	NONGGOT010424.1	92	75	5	1	257	330	1	75	9e-19	93.7
XLOC_001020	NONGGOT015363.1	86.75	166	19	1	877	1042	393	555	6e-36	151
XLOC_001021	NONGGOT014166.1	96.43	28	1	0	81	108	1170	1143	6e-05	48.1
XLOC_001021	NONGGOT009142.1	100	33	0	0	950	982	926	894	3e-10	65.9
XLOC_001021	NONGGOT009142.1	100	33	0	0	1154	1186	926	894	4e-10	65.9
XLOC_001021	NONGGOT009142.1	100	33	0	0	1379	1411	926	894	4e-10	65.9
XLOC_001021	NONGGOT010426.1	91.36	162	13	1	2496	2656	39	200	5e-51	202
XLOC_001021	NONGGOT009142.1	100	33	0	0	1396	1428	926	894	4e-10	65.9
XLOC_001021	NONGGOT010426.1	91.36	162	13	1	2513	2673	39	200	5e-51	202
XLOC_001021	NONGGOT010426.1	91.25	160	13	1	2665	2823	41	200	8e-50	198
XLOC_001021	NONGGOT010426.1	91.25	160	13	1	2435	2593	41	200	7e-50	198
XLOC_001021	NONGGOT010426.1	91.25	160	13	1	2584	2742	41	200	7e-50	198
XLOC_001021	NONGGOT010426.1	91.25	160	13	1	2356	2514	41	200	7e-50	198
XLOC_001021	NONGGOT020153.1	93.48	46	3	0	88	133	411	456	1e-10	67.9
XLOC_001021	NONGGOT010426.1	91.36	162	13	1	2855	3015	39	200	5e-51	202
XLOC_001021	NONGGOT010426.1	91.36	162	13	1	1703	1863	39	200	3e-51	202
XLOC_001021	NONGGOT010426.1	91.36	162	13	1	1916	2076	39	200	4e-51	202
XLOC_001021	NONGGOT010426.1	91.25	160	13	1	2150	2308	41	200	6e-50	198
XLOC_001021	NONGGOT010426.1	91.19	159	13	1	733	890	42	200	1e-49	196
XLOC_001021	NONGGOT010426.1	91.19	159	13	1	712	869	42	200	1e-49	196
XLOC_001023	NONGGOT020697.1	97.14	35	1	0	208	242	1057	1023	2e-09	61.9
XLOC_001024	NONGGOT016299.1	95.56	270	12	0	153	422	788	519	5e-123	440
XLOC_001025	NONGGOT012823.1	96	25	1	0	65	89	473	497	0.0009	42.1
XLOC_001027	NONGGOT000536.1	93.94	33	2	0	790	822	484	452	2e-05	50.1
XLOC_001027	NONGGOT013823.1	92.31	65	5	0	825	889	172	108	2e-17	89.7
XLOC_001027	NONGGOT013823.1	92.31	65	5	0	1733	1797	172	108	3e-17	89.7
XLOC_001027	NONGGOT001700.1	91.18	34	3	0	429	462	1914	1881	0.0005	44.1
XLOC_001027	NONGGOT012492.1	87.55	273	32	1	1055	1327	68	338	3e-60	232
XLOC_001027	NONGGOT010256.1	95.56	90	4	0	27	116	375	286	6e-35	147
XLOC_001027	NONGGOT010256.1	95.56	90	4	0	27	116	375	286	6e-35	147
XLOC_001027	NONGGOT010256.1	95.56	90	4	0	27	116	375	286	8e-35	147
XLOC_001027	NONGGOT013823.1	92.31	65	5	0	905	969	172	108	2e-17	89.7
XLOC_001027	NONGGOT013823.1	92.31	65	5	0	966	1030	172	108	2e-17	89.7
XLOC_001028	NONGGOT010431.1	90.28	72	7	0	112	183	114	185	2e-17	87.7
XLOC_001030	NONGGOT019152.1	94.2	69	4	0	323	391	117	49	3e-22	105
XLOC_001030	NONGGOT019152.1	94.2	69	4	0	424	492	117	49	3e-22	105
XLOC_001032	NONGGOT009314.1	85.91	298	42	0	991	1288	2757	2460	5e-68	258
XLOC_001034	NONGGOT014990.1	90.22	92	9	0	1234	1325	1315	1224	9e-24	111
XLOC_001034	NONGGOT014990.1	90.22	92	9	0	1173	1264	1315	1224	9e-24	111
XLOC_001034	NONGGOT014990.1	90.22	92	9	0	939	1030	1315	1224	8e-24	111
XLOC_001034	NONGGOT014990.1	90.22	92	9	0	1885	1976	1315	1224	1e-23	111
XLOC_001034	NONGGOT014990.1	90.22	92	9	0	945	1036	1315	1224	8e-24	111
XLOC_001035	NONGGOT012677.1	90.41	271	26	0	1727	1997	368	638	6e-90	331
XLOC_001036	NONGGOT010690.1	93.33	30	2	0	954	983	100	71	0.0009	44.1
XLOC_001036	NONGGOT010690.1	93.33	30	2	0	678	707	100	71	0.0006	44.1
XLOC_001037	NONGGOT003528.1	96.77	31	1	0	1414	1444	246	276	3e-06	54
XLOC_001038	NONGGOT003447.1	97.48	119	3	0	411	529	79	197	9e-55	212
XLOC_001040	NONGGOT016475.1	87.38	103	13	0	69	171	474	576	1e-21	101
XLOC_001041	NONGGOT009123.1	92.11	38	3	0	723	760	460	423	3e-06	52
XLOC_001041	NONGGOT008928.1	92.42	66	3	1	701	764	429	364	2e-16	85.7
XLOC_001041	NONGGOT011590.1	88.1	42	5	0	285	326	115	74	0.0005	44.1
XLOC_001041	NONGGOT008928.1	92.42	66	3	1	449	512	429	364	2e-16	85.7
XLOC_001041	NONGGOT011590.1	87.8	41	5	0	44	84	114	74	0.001	42.1
XLOC_001043	NONGGOT009009.1	90.15	132	12	1	559	689	1773	1904	3e-36	151
XLOC_001050	NONGGOT013657.1	90.32	93	9	0	189	281	1349	1441	1e-24	113
XLOC_001051	NONGGOT011048.1	89.66	87	7	1	352	436	782	696	3e-19	95.6
XLOC_001056	NONGGOT009584.1	95.96	198	8	0	1	198	1121	924	9e-90	329
XLOC_001058	NONGGOT017857.1	96.15	26	1	0	460	485	1058	1083	0.0005	44.1
XLOC_001062	NONGGOT012035.1	87.76	98	12	0	347	444	4379	4282	8e-21	99.6
XLOC_001066	NONGGOT009896.1	93.02	43	3	0	226	268	1	43	1e-09	61.9
XLOC_001067	NONGGOT009563.1	94.96	119	5	1	253	371	248	131	3e-45	180
XLOC_001072	NONGGOT010603.1	89.84	246	25	0	2652	2897	252	7	3e-77	289
XLOC_001074	NONGGOT012737.1	96.15	26	1	0	96	121	461	436	0.0005	44.1
XLOC_001075	NONGGOT009873.1	97.87	94	2	0	123	216	89	182	1e-42	170
XLOC_001077	NONGGOT011992.1	93.33	45	3	0	256	300	244	200	2e-10	65.9
XLOC_001077	NONGGOT011992.1	93.33	45	3	0	256	300	244	200	3e-10	65.9
XLOC_001080	NONGGOT009537.1	95.87	218	8	1	447	664	281	65	7e-97	353
XLOC_001080	NONGGOT009537.1	95.87	218	8	1	447	664	281	65	8e-97	353
XLOC_001084	NONGGOT017647.1	100	22	0	0	19	40	372	351	0.0002	44.1
XLOC_001085	NONGGOT012470.1	86.08	79	10	1	7	84	763	685	1e-09	61.9
XLOC_001085	NONGGOT019066.1	87.6	121	15	0	77	197	412	292	3e-27	121
XLOC_001085	NONGGOT019066.1	87.6	121	15	0	77	197	412	292	3e-27	121
XLOC_001086	NONGGOT010982.1	85.16	128	14	1	74	196	26	153	5e-22	103
XLOC_001087	NONGGOT001771.1	87.38	103	13	0	46	148	1089	987	7e-21	101
XLOC_001087	NONGGOT001771.1	87.38	103	13	0	46	148	1089	987	9e-21	101
XLOC_001087	NONGGOT001771.1	87.38	103	13	0	46	148	1089	987	9e-21	101
XLOC_001087	NONGGOT001771.1	87.38	103	13	0	46	148	1089	987	8e-21	101
XLOC_001087	NONGGOT019571.1	92.5	80	6	0	2	81	257	178	2e-24	111
XLOC_001089	NONGGOT010211.1	87.14	241	29	1	1339	1579	101	339	2e-49	196
XLOC_001089	NONGGOT010211.1	87.14	241	29	1	1339	1579	101	339	3e-49	196
XLOC_001089	NONGGOT010211.1	87.14	241	29	1	1339	1579	101	339	3e-49	196
XLOC_001089	NONGGOT002092.1	87.97	133	16	0	475	607	1923	2055	6e-32	137
XLOC_001089	NONGGOT002092.1	87.97	133	16	0	475	607	1923	2055	9e-32	137
XLOC_001089	NONGGOT002092.1	87.97	133	16	0	475	607	1923	2055	9e-32	137
XLOC_001089	NONGGOT002820.1	100	23	0	0	731	753	1811	1789	0.0003	46.1
XLOC_001089	NONGGOT000709.1	96.97	33	1	0	1371	1403	915	947	8e-08	58
XLOC_001089	NONGGOT000709.1	96.97	33	1	0	1264	1296	915	947	1e-07	58
XLOC_001089	NONGGOT002820.1	100	23	0	0	404	426	1811	1789	0.0002	46.1
XLOC_001090	NONGGOT016299.1	90.32	155	15	0	549	703	520	674	2e-47	188
XLOC_001091	NONGGOT012627.1	96.3	27	1	0	1651	1677	5326	5300	0.0004	46.1
XLOC_001091	NONGGOT018033.1	96.15	26	1	0	39	64	3460	3485	0.0005	44.1
XLOC_001094	NONGGOT003323.1	88.57	70	8	0	517	586	216	285	9e-13	75.8
XLOC_001094	NONGGOT003323.1	88.57	70	8	0	517	586	216	285	9e-13	75.8
XLOC_001094	NONGGOT003323.1	88.57	70	8	0	517	586	216	285	8e-13	75.8
XLOC_001095	NONGGOT013088.1	91.67	36	3	0	80	115	204	169	3e-05	48.1
XLOC_001098	NONGGOT007830.1	90.54	148	14	0	4935	5082	567	420	7e-45	182
XLOC_001098	NONGGOT016299.1	89.84	246	24	1	5694	5939	522	766	7e-67	256
XLOC_001100	NONGGOT010950.1	100	25	0	0	3	27	148	124	5e-06	50.1
XLOC_001107	NONGGOT003760.1	85.63	334	45	3	100	431	1103	1435	1e-68	258
XLOC_001108	NONGGOT009607.1	95.79	190	8	0	106	295	277	88	3e-85	313
XLOC_001108	NONGGOT009607.1	95.81	191	8	0	106	296	277	87	8e-86	315
XLOC_001114	NONGGOT009623.1	98.44	64	1	0	186	249	268	205	4e-27	119
XLOC_001114	NONGGOT009813.1	96.15	26	1	0	17	42	657	682	0.0002	44.1
XLOC_001115	NONGGOT013819.1	96.3	27	1	0	37	63	150	124	0.0002	46.1
XLOC_001117	NONGGOT014589.1	87.78	180	18	1	1	176	724	545	2e-45	180
XLOC_001122	NONGGOT009632.1	90.45	335	21	2	725	1056	690	364	9e-115	412
XLOC_001122	NONGGOT009632.1	90.36	332	21	2	725	1053	690	367	6e-113	406
XLOC_001124	NONGGOT015975.1	96.67	30	1	0	284	313	205	176	3e-06	52
XLOC_001124	NONGGOT015975.1	96.67	30	1	0	284	313	205	176	3e-06	52
XLOC_001128	NONGGOT004731.1	86.21	58	8	0	623	680	835	892	2e-06	52
XLOC_001128	NONGGOT009683.1	96.59	88	3	0	1050	1137	318	231	6e-36	151
XLOC_001128	NONGGOT009683.1	96.59	88	3	0	701	788	318	231	4e-36	151
XLOC_001128	NONGGOT009683.1	90.67	150	14	0	64	213	478	329	7e-47	186
XLOC_001128	NONGGOT009683.1	96.59	88	3	0	420	507	318	231	4e-36	151
XLOC_001129	NONGGOT009685.1	95.12	82	4	0	833	914	1116	1035	4e-30	131
XLOC_001130	NONGGOT009685.1	92.53	870	60	4	5	872	868	2	0	1096
XLOC_001130	NONGGOT009685.1	92.54	871	60	4	5	873	868	1	0	1098
XLOC_001130	NONGGOT009685.1	92.52	869	60	4	5	871	868	3	0	1094
XLOC_001130	NONGGOT008954.1	87.18	78	10	0	218	295	837	914	8e-14	75.8
XLOC_001130	NONGGOT005412.1	81.87	342	52	5	349	687	1239	905	9e-38	157
XLOC_001135	NONGGOT009704.1	94.74	304	14	2	268	570	542	240	3e-129	460
XLOC_001136	NONGGOT012878.1	88.64	44	5	0	415	458	958	1001	9e-05	48.1
XLOC_001136	NONGGOT012878.1	88.64	44	5	0	415	458	958	1001	9e-05	48.1
XLOC_001141	NONGGOT009738.1	90.53	169	13	1	246	414	248	83	2e-52	204
XLOC_001141	NONGGOT009738.1	90.44	251	21	1	319	569	248	1	3e-82	303
XLOC_001147	NONGGOT020004.1	94.42	197	11	0	1795	1991	702	506	4e-81	303
XLOC_001147	NONGGOT020004.1	94.42	197	11	0	1795	1991	702	506	4e-81	303
XLOC_001147	NONGGOT020004.1	94.42	197	11	0	1795	1991	702	506	4e-81	303
XLOC_001147	NONGGOT020004.1	94.42	197	11	0	1795	1991	702	506	4e-81	303
XLOC_001150	NONGGOT001564.1	89.94	179	17	1	77	255	4444	4267	2e-52	204
XLOC_001151	NONGGOT020163.1	88.07	243	29	0	2236	2478	4080	4322	6e-66	252
XLOC_001152	NONGGOT009314.1	88.45	277	31	1	796	1072	2475	2750	5e-66	252
XLOC_001154	NONGGOT010463.1	92.12	203	12	1	792	990	384	182	5e-73	274
XLOC_001155	NONGGOT018111.1	81.85	270	44	3	4	268	1557	1288	5e-29	127
XLOC_001155	NONGGOT010459.1	90.76	119	11	0	903	1021	243	125	2e-35	149
XLOC_001155	NONGGOT020740.1	87.91	273	31	2	334	605	2036	1765	5e-70	264
XLOC_001160	NONGGOT013734.1	85.71	105	15	0	1125	1229	4521	4625	3e-17	89.7
XLOC_001161	NONGGOT000706.1	89.11	202	19	2	4135	4335	2945	3144	8e-54	212
XLOC_001163	NONGGOT010250.1	95.87	315	13	0	102	416	315	1	3e-147	521
XLOC_001163	NONGGOT010250.1	95.87	315	13	0	102	416	315	1	3e-147	521
XLOC_001163	NONGGOT010250.1	95.87	315	13	0	102	416	315	1	3e-147	521
XLOC_001163	NONGGOT006698.1	95.24	42	2	0	252	293	2394	2353	4e-11	67.9
XLOC_001166	NONGGOT017607.1	97.3	74	2	0	1	74	1085	1158	3e-30	131
XLOC_001166	NONGGOT017607.1	97.3	74	2	0	1	74	1085	1158	5e-30	131
XLOC_001167	NONGGOT013698.1	83.47	236	36	1	43	275	695	930	2e-37	155
XLOC_001168	NONGGOT010274.1	90	240	18	2	3	239	237	1	3e-74	278
XLOC_001168	NONGGOT010274.1	90	240	18	2	3	239	237	1	3e-74	278
XLOC_001168	NONGGOT010274.1	90	240	18	2	3	239	237	1	4e-74	278
XLOC_001168	NONGGOT010274.1	90	240	18	2	3	239	237	1	5e-74	278
XLOC_001168	NONGGOT010274.1	90	240	18	2	3	239	237	1	5e-74	278
XLOC_001171	NONGGOT010485.1	92.59	54	4	0	22	75	281	228	9e-14	75.8
XLOC_001172	NONGGOT010486.1	89.04	73	8	0	124	196	258	186	2e-15	81.8
XLOC_001172	NONGGOT010486.1	85.45	110	15	1	300	408	258	149	5e-16	83.8
XLOC_001172	NONGGOT010486.1	85.45	110	15	1	300	408	258	149	7e-16	83.8
XLOC_001172	NONGGOT010486.1	85.45	110	15	1	300	408	258	149	9e-16	83.8
XLOC_001172	NONGGOT010486.1	89.04	73	8	0	5	77	258	186	9e-16	81.8
XLOC_001172	NONGGOT002762.1	86.81	235	23	1	7	241	3943	4169	4e-48	190
XLOC_001174	NONGGOT003809.1	100	25	0	0	811	835	210	186	1e-05	50.1
XLOC_001176	NONGGOT018467.1	100	28	0	0	654	681	471	444	1e-07	56
XLOC_001177	NONGGOT015197.1	86.5	163	13	1	527	680	1237	1075	5e-38	157
XLOC_001179	NONGGOT014412.1	91.23	57	5	0	17	73	579	523	7e-13	73.8
XLOC_001179	NONGGOT014412.1	91.23	57	5	0	17	73	579	523	7e-13	73.8
XLOC_001179	NONGGOT014412.1	91.23	57	5	0	17	73	579	523	4e-13	73.8
XLOC_001181	NONGGOT010503.1	95.18	83	4	0	490	572	237	155	7e-31	133
XLOC_001183	NONGGOT015661.1	93.55	31	2	0	70	100	213	243	6e-05	46.1
XLOC_001185	NONGGOT003826.1	90.7	43	4	0	261	303	1614	1572	3e-07	54
XLOC_001186	NONGGOT011657.1	90.16	122	11	1	534	654	466	345	1e-32	139
XLOC_001188	NONGGOT019571.1	100	25	0	0	1	25	176	152	4e-06	50.1
XLOC_001189	NONGGOT010227.1	85.99	157	16	2	2	155	825	672	1e-29	129
XLOC_001193	NONGGOT005578.1	89.11	257	26	2	917	1171	593	337	4e-72	272
XLOC_001193	NONGGOT005578.1	89.11	257	26	2	917	1171	593	337	5e-72	272
XLOC_001194	NONGGOT009126.1	96.55	29	1	0	354	382	1024	996	5e-06	50.1
XLOC_001197	NONGGOT008867.1	93.88	49	3	0	678	726	1164	1212	7e-13	73.8
XLOC_001198	NONGGOT010533.1	89.01	455	16	5	13	462	820	395	2e-148	523
XLOC_001198	NONGGOT010533.1	89.01	455	16	5	13	462	820	395	2e-148	523
XLOC_001199	NONGGOT010541.1	86.84	76	6	1	1166	1237	110	35	2e-11	69.9
XLOC_001199	NONGGOT010541.1	86.84	76	6	1	277	348	110	35	1e-11	69.9
XLOC_001199	NONGGOT010541.1	86.84	76	6	1	277	348	110	35	7e-12	69.9
XLOC_001199	NONGGOT010542.1	92.4	263	19	1	187	449	262	1	1e-97	355
XLOC_001199	NONGGOT010542.1	92.4	263	19	1	433	695	262	1	2e-97	355
XLOC_001199	NONGGOT010541.1	86.84	76	6	1	128	199	110	35	5e-12	69.9
XLOC_001200	NONGGOT009047.1	84.5	200	31	0	222	421	520	719	2e-36	151
XLOC_001200	NONGGOT009047.1	84.5	200	31	0	222	421	520	719	3e-36	151
XLOC_001202	NONGGOT018086.1	88.97	136	15	0	2	137	400	265	3e-36	151
XLOC_001203	NONGGOT018631.1	90.7	43	3	1	77	119	71	112	9e-05	46.1
XLOC_001205	NONGGOT011021.1	91.84	196	13	1	407	602	236	44	2e-68	258
XLOC_001207	NONGGOT000328.1	90.37	218	21	0	729	946	2284	2501	1e-69	266
XLOC_001207	NONGGOT000328.1	90.37	218	21	0	729	946	2284	2501	1e-69	266
XLOC_001207	NONGGOT000328.1	90.37	218	21	0	729	946	2284	2501	1e-69	266
XLOC_001207	NONGGOT000328.1	90.37	218	21	0	729	946	2284	2501	1e-69	266
XLOC_001207	NONGGOT000328.1	90.37	218	21	0	729	946	2284	2501	1e-69	266
XLOC_001207	NONGGOT000328.1	90.37	218	21	0	729	946	2284	2501	1e-69	266
XLOC_001207	NONGGOT000328.1	90.37	218	21	0	729	946	2284	2501	1e-69	266
XLOC_001207	NONGGOT000328.1	90.37	218	21	0	729	946	2284	2501	1e-69	266
XLOC_001208	NONGGOT008822.1	100	25	0	0	1740	1764	149	173	2e-05	50.1
XLOC_001208	NONGGOT008822.1	100	25	0	0	427	451	149	173	9e-06	50.1
XLOC_001214	NONGGOT015100.1	91.75	97	8	0	40	136	4050	4146	2e-29	129
XLOC_001216	NONGGOT018255.1	87.96	274	30	2	783	1054	1709	1437	8e-71	268
XLOC_001216	NONGGOT018255.1	87.96	274	30	2	783	1054	1709	1437	8e-71	268
XLOC_001217	NONGGOT014859.1	90.57	212	17	2	757	968	30	238	1e-64	248
XLOC_001217	NONGGOT014859.1	90.57	212	17	2	757	968	30	238	9e-65	248
XLOC_001217	NONGGOT016299.1	90.18	275	21	1	1253	1527	521	789	3e-90	333
XLOC_001217	NONGGOT016299.1	90.18	275	21	1	1253	1527	521	789	2e-90	333
XLOC_001218	NONGGOT011323.1	88.75	160	18	0	75	234	1628	1469	1e-43	174
XLOC_001220	NONGGOT010579.1	100	169	0	0	219	387	1726	1558	9e-92	335
XLOC_001220	NONGGOT010579.1	93.91	542	33	0	497	1038	558	17	0	741
XLOC_001220	NONGGOT010579.1	100	168	0	0	219	386	1726	1559	5e-91	333
XLOC_001220	NONGGOT010579.1	97.43	584	12	3	219	800	1726	1144	0	973
XLOC_001220	NONGGOT010579.1	93.29	417	24	2	3	415	999	583	3e-169	593
XLOC_001234	NONGGOT001225.1	88.99	109	12	0	180	288	160	268	4e-27	121
XLOC_001236	NONGGOT010434.1	93.59	952	52	3	266	1217	1124	2066	0	1392
XLOC_001237	NONGGOT010434.1	89.47	38	4	0	1	38	2293	2330	0.0003	44.1
XLOC_001237	NONGGOT010434.1	96.55	29	1	0	6	34	2390	2418	4e-06	50.1
XLOC_001238	NONGGOT010575.1	88.87	467	40	6	809	1265	1	465	8e-134	478
XLOC_001239	NONGGOT012726.1	86.27	51	7	0	66	116	5543	5593	5e-05	46.1
XLOC_001240	NONGGOT010620.1	87.14	140	18	0	901	1040	294	155	4e-31	135
XLOC_001240	NONGGOT010620.1	87.5	144	18	0	117	260	298	155	3e-34	143
XLOC_001243	NONGGOT000496.1	94.23	52	3	0	1	52	83	32	1e-14	79.8
XLOC_001243	NONGGOT000618.1	91.67	72	6	0	833	904	1754	1825	2e-19	95.6
XLOC_002085	NONGGOT004861.1	87.4	254	24	3	3503	3749	1039	1291	7e-61	236
XLOC_002088	NONGGOT001131.1	91.96	112	9	0	39	150	199	88	3e-36	151
XLOC_002089	NONGGOT003910.1	97.3	37	1	0	1600	1636	1231	1267	4e-10	65.9
XLOC_002089	NONGGOT003910.1	97.3	37	1	0	983	1019	1231	1267	2e-10	65.9
XLOC_002089	NONGGOT003910.1	97.3	37	1	0	948	984	1231	1267	2e-10	65.9
XLOC_002089	NONGGOT003910.1	97.3	37	1	0	1127	1163	1231	1267	3e-10	65.9
XLOC_002089	NONGGOT003910.1	97.3	37	1	0	961	997	1231	1267	2e-10	65.9
XLOC_002092	NONGGOT004392.1	95.38	65	3	0	1	65	77	13	6e-22	105
XLOC_002093	NONGGOT003918.1	98.25	171	3	0	56	226	1	171	4e-86	315
XLOC_002095	NONGGOT004257.1	91.43	35	3	0	967	1001	1305	1271	0.0004	46.1
XLOC_002099	NONGGOT019411.1	87.2	125	15	1	334	458	7030	7153	2e-24	113
XLOC_002099	NONGGOT020364.1	94.29	35	2	0	1	35	1210	1244	2e-06	54
XLOC_002100	NONGGOT011050.1	90.08	131	11	2	412	541	3511	3640	3e-33	141
XLOC_002101	NONGGOT013406.1	89.29	56	4	1	242	297	94	41	3e-08	58
XLOC_002102	NONGGOT007517.1	85.19	81	12	0	199	279	711	631	6e-11	65.9
XLOC_002103	NONGGOT000140.1	86.89	122	6	2	1	112	854	733	7e-26	115
XLOC_002104	NONGGOT010874.1	100	27	0	0	7	33	82	56	6e-07	54
XLOC_002106	NONGGOT008410.1	93.28	119	8	0	1842	1960	528	410	5e-42	172
XLOC_002108	NONGGOT016378.1	84.29	210	33	0	210	419	150	359	2e-37	155
XLOC_002110	NONGGOT004424.1	94.44	36	2	0	1	36	312	277	1e-07	56
XLOC_002112	NONGGOT005444.1	88.55	131	15	0	757	887	306	436	9e-33	141
XLOC_002118	NONGGOT004535.1	88.89	63	7	0	24	86	634	572	7e-12	69.9
XLOC_002119	NONGGOT020697.1	89.8	49	5	0	176	224	1333	1381	1e-08	58
XLOC_002122	NONGGOT003999.1	97.22	324	9	0	136	459	143	466	9e-163	571
XLOC_002124	NONGGOT005584.1	93.1	29	2	0	106	134	920	892	0.0007	42.1
XLOC_002125	NONGGOT004011.1	100	23	0	0	395	417	254	276	0.0001	46.1
XLOC_002125	NONGGOT004011.1	100	23	0	0	395	417	254	276	0.0001	46.1
XLOC_002125	NONGGOT004452.1	95.74	94	4	0	847	940	94	1	6e-37	155
XLOC_002125	NONGGOT004452.1	95.74	94	4	0	825	918	94	1	6e-37	155
XLOC_002126	NONGGOT009339.1	95	60	3	0	533	592	1770	1711	2e-19	95.6
XLOC_002127	NONGGOT005444.1	93.33	90	6	0	1049	1138	347	436	6e-30	131
XLOC_002127	NONGGOT005444.1	93.33	90	6	0	554	643	347	436	3e-30	131
XLOC_002130	NONGGOT020589.1	96.67	30	1	0	133	162	197	168	1e-06	52
XLOC_002130	NONGGOT020589.1	96.67	30	1	0	684	713	197	168	3e-06	52
XLOC_002130	NONGGOT020589.1	96.67	30	1	0	114	143	197	168	1e-06	52
XLOC_002130	NONGGOT020589.1	96.67	30	1	0	276	305	197	168	2e-06	52
XLOC_002131	NONGGOT016330.1	90.15	457	40	2	147	599	931	1386	3e-153	539
XLOC_002132	NONGGOT020740.1	97.44	39	1	0	1	39	3583	3621	5e-12	69.9
XLOC_002137	NONGGOT001585.1	88.79	223	24	1	4375	4597	1235	1014	7e-61	236
XLOC_002137	NONGGOT001585.1	88.79	223	24	1	4390	4612	1235	1014	7e-61	236
XLOC_002137	NONGGOT001585.1	88.79	223	24	1	3284	3506	1235	1014	6e-61	236
XLOC_002137	NONGGOT018690.1	90.72	97	9	0	222	318	2477	2573	9e-27	121
XLOC_002137	NONGGOT003652.1	88.64	132	15	0	10	141	383	252	1e-33	143
XLOC_002139	NONGGOT002691.1	93.48	46	3	0	331	376	2025	2070	2e-11	67.9
XLOC_002144	NONGGOT003236.1	90.38	52	5	0	308	359	620	569	4e-10	63.9
XLOC_002145	NONGGOT002208.1	87.72	114	14	0	361	474	167	54	1e-25	115
XLOC_002147	NONGGOT014565.1	96.67	30	1	0	390	419	995	1024	1e-06	52
XLOC_002147	NONGGOT014565.1	96.67	30	1	0	426	455	995	1024	2e-06	52
XLOC_002147	NONGGOT014565.1	96.67	30	1	0	369	398	995	1024	1e-06	52
XLOC_002152	NONGGOT016299.1	91.88	271	20	2	3021	3290	790	521	4e-86	319
XLOC_002152	NONGGOT020394.1	100	24	0	0	3015	3038	733	710	0.0002	48.1
XLOC_002154	NONGGOT004071.1	95.58	113	5	0	165	277	219	331	1e-46	184
XLOC_002156	NONGGOT004073.1	93.86	114	6	1	6	118	418	531	1e-39	163
XLOC_002158	NONGGOT004082.1	94.9	431	22	0	105	535	1	431	0	680
XLOC_002158	NONGGOT004082.1	94.9	431	22	0	160	590	1	431	0	680
XLOC_002159	NONGGOT016299.1	89.71	272	28	0	679	950	789	518	5e-86	317
XLOC_002159	NONGGOT016299.1	89.71	272	28	0	192	463	789	518	4e-86	317
XLOC_002161	NONGGOT010472.1	96.3	27	1	0	121	147	281	255	0.0003	46.1
XLOC_002165	NONGGOT017607.1	94.32	88	4	1	918	1004	1158	1071	7e-29	127
XLOC_002166	NONGGOT013981.1	87.71	236	22	2	889	1118	2126	2360	2e-60	232
XLOC_002166	NONGGOT013981.1	87.71	236	22	2	724	953	2126	2360	2e-60	232
XLOC_002166	NONGGOT004517.1	94.53	750	33	3	843	1584	1826	1077	0	1148
XLOC_002167	NONGGOT004428.1	92.8	125	9	0	1	125	653	529	7e-44	176
XLOC_002169	NONGGOT020359.1	90.12	81	8	0	1	81	1932	1852	2e-20	97.6
XLOC_002173	NONGGOT012099.1	97.06	34	1	0	386	419	141	174	8e-09	60
XLOC_002173	NONGGOT010558.1	88.37	172	20	0	3	174	2389	2218	1e-45	182
XLOC_002184	NONGGOT005645.1	89.13	46	5	0	187	232	894	939	1e-06	52
XLOC_002185	NONGGOT018113.1	94.12	34	2	0	341	374	503	536	5e-06	52
XLOC_002186	NONGGOT018231.1	86.89	183	24	0	587	769	278	96	1e-42	172
XLOC_002188	NONGGOT011450.1	93.33	60	4	0	2250	2309	664	723	2e-16	87.7
XLOC_002190	NONGGOT016360.1	86.89	61	8	0	715	775	413	473	4e-08	58
XLOC_002191	NONGGOT009504.1	90.83	120	11	0	419	538	201	82	4e-36	151
XLOC_002201	NONGGOT010297.1	83.49	218	25	1	513	730	3258	3052	2e-38	159
XLOC_002205	NONGGOT013481.1	90.38	530	47	3	898	1425	116	643	3e-178	624
XLOC_002205	NONGGOT013481.1	90.38	530	47	3	745	1272	116	643	3e-178	624
XLOC_002205	NONGGOT013481.1	91.2	648	50	4	382	1027	1	643	0	807
XLOC_002205	NONGGOT013481.1	90.38	530	47	3	668	1195	116	643	3e-178	624
XLOC_002205	NONGGOT013481.1	90.38	530	47	3	616	1143	116	643	3e-178	624
XLOC_002205	NONGGOT013481.1	91.2	648	50	4	229	874	1	643	0	807
XLOC_002205	NONGGOT013481.1	90.38	530	47	3	616	1143	116	643	3e-178	624
XLOC_002205	NONGGOT013481.1	91.2	648	50	4	257	902	1	643	0	807
XLOC_002208	NONGGOT019051.1	90.24	41	4	0	396	436	44	4	6e-06	50.1
XLOC_002208	NONGGOT019051.1	90.24	41	4	0	1464	1504	44	4	2e-05	50.1
XLOC_002214	NONGGOT009776.1	96.88	32	1	0	273	304	960	929	2e-07	56
XLOC_002214	NONGGOT011121.1	84.91	212	31	1	517	727	606	395	1e-38	159
XLOC_002216	NONGGOT020382.1	88.68	106	12	0	1	106	4	109	5e-25	115
XLOC_002220	NONGGOT002484.1	89.25	93	10	0	324	416	99	191	3e-22	105
XLOC_002220	NONGGOT002484.1	89.25	93	10	0	326	418	99	191	3e-22	105
XLOC_002226	NONGGOT016299.1	91.82	269	17	1	704	967	789	521	1e-98	359
XLOC_002230	NONGGOT017323.1	81.84	468	80	3	285	747	592	125	1e-60	234
XLOC_002230	NONGGOT017323.1	81.84	468	80	3	255	717	592	125	1e-60	234
XLOC_002231	NONGGOT012483.1	100	22	0	0	2	23	299	278	0.001	44.1
XLOC_002232	NONGGOT016818.1	100	53	0	0	490	542	694	746	1e-22	105
XLOC_002234	NONGGOT003667.1	96.97	33	1	0	432	464	392	424	5e-08	58
XLOC_002240	NONGGOT000556.1	91.11	90	7	1	109	198	514	602	4e-23	107
XLOC_002244	NONGGOT010211.1	88.73	275	29	2	8572	8845	330	57	5e-75	283
XLOC_002244	NONGGOT020686.1	89.45	957	90	5	626	1574	2025	2978	0	1035
XLOC_002246	NONGGOT001084.1	85.08	181	24	1	176	353	3128	2948	2e-33	141
XLOC_002250	NONGGOT005809.1	89.23	260	20	2	1044	1297	737	480	2e-77	289
XLOC_002253	NONGGOT017302.1	100	24	0	0	987	1010	642	665	0.0002	48.1
XLOC_002253	NONGGOT017682.1	100	23	0	0	2506	2528	869	891	0.0006	46.1
XLOC_002253	NONGGOT017682.1	100	23	0	0	2453	2475	869	891	0.0006	46.1
XLOC_002254	NONGGOT019572.1	92.31	52	4	0	23	74	872	821	2e-12	71.9
XLOC_002257	NONGGOT004735.1	96.99	166	5	0	285	450	868	703	6e-68	256
XLOC_002258	NONGGOT016285.1	89.01	191	19	2	1	190	556	367	5e-50	196
XLOC_002259	NONGGOT004254.1	98.15	162	3	0	118	279	206	367	9e-81	297
XLOC_002259	NONGGOT004254.1	98.15	162	3	0	75	236	206	367	8e-81	297
XLOC_002261	NONGGOT010374.1	85.82	282	40	0	910	1191	775	494	4e-63	242
XLOC_002263	NONGGOT009767.1	88.56	236	26	1	1622	1856	3092	2857	3e-64	246
XLOC_002264	NONGGOT001117.1	93.14	102	7	0	95	196	286	185	7e-35	147
XLOC_002266	NONGGOT005544.1	84.56	259	36	2	876	1133	2230	1975	7e-46	184
XLOC_002267	NONGGOT004273.1	93.42	228	13	2	1	227	159	385	8e-87	317
XLOC_002268	NONGGOT015173.1	94.62	93	5	0	1134	1226	551	459	9e-34	145
XLOC_002270	NONGGOT016471.1	91.04	67	6	0	396	462	59	125	1e-16	85.7
XLOC_002272	NONGGOT008965.1	90.57	212	20	0	89	300	672	461	5e-69	262
XLOC_002272	NONGGOT004284.1	95.68	139	6	0	63	201	14	152	5e-60	228
XLOC_002272	NONGGOT020660.1	100	23	0	0	1782	1804	1776	1754	0.0005	46.1
XLOC_002272	NONGGOT020660.1	100	23	0	0	1799	1821	1776	1754	0.0005	46.1
XLOC_002272	NONGGOT004284.1	94.5	291	15	1	57	346	14	304	3e-123	442
XLOC_002272	NONGGOT004284.1	94.5	291	15	1	57	346	14	304	1e-123	442
XLOC_002272	NONGGOT020660.1	100	23	0	0	1798	1820	1776	1754	0.0005	46.1
XLOC_002272	NONGGOT020660.1	100	23	0	0	1586	1608	1776	1754	0.0004	46.1
XLOC_002272	NONGGOT020660.1	100	23	0	0	1592	1614	1776	1754	0.0004	46.1
XLOC_002273	NONGGOT013806.1	96.15	26	1	0	166	191	1	26	0.0005	44.1
XLOC_002274	NONGGOT000108.1	92.5	40	2	1	193	231	1302	1341	2e-05	48.1
XLOC_002276	NONGGOT012152.1	90.91	143	13	0	7	149	944	802	2e-45	180
XLOC_002277	NONGGOT020660.1	92.52	107	8	0	160	266	1718	1612	6e-36	149
XLOC_002279	NONGGOT000131.1	100	22	0	0	65	86	1109	1088	0.0008	44.1
XLOC_002280	NONGGOT015934.1	86.67	60	8	0	2009	2068	253	194	5e-07	56
XLOC_002281	NONGGOT001901.1	84.91	265	38	2	961	1223	625	361	3e-48	192
XLOC_002282	NONGGOT000064.1	88.89	54	5	1	1124	1176	581	634	1e-05	52
XLOC_002282	NONGGOT000064.1	88.89	54	5	1	930	982	581	634	1e-05	52
XLOC_002282	NONGGOT000064.1	88.89	54	5	1	1438	1490	581	634	1e-05	52
XLOC_002282	NONGGOT000064.1	88.89	54	5	1	839	891	581	634	1e-05	52
XLOC_002282	NONGGOT000064.1	88.89	54	5	1	786	838	581	634	1e-05	52
XLOC_002282	NONGGOT000064.1	88.89	54	5	1	801	853	581	634	1e-05	52
XLOC_002282	NONGGOT000064.1	88.89	54	5	1	974	1026	581	634	1e-05	52
XLOC_002283	NONGGOT008623.1	84.07	427	59	4	346	766	548	125	1e-76	285
XLOC_002284	NONGGOT007434.1	91.18	34	3	0	309	342	415	448	0.0006	44.1
XLOC_002284	NONGGOT016492.1	100	22	0	0	52	73	886	907	0.0007	44.1
XLOC_002284	NONGGOT005364.1	96.23	53	2	0	393	445	1567	1619	7e-18	89.7
XLOC_002285	NONGGOT019383.1	89.02	346	38	0	1118	1463	2100	2445	4e-106	385
XLOC_002285	NONGGOT004442.1	85.94	64	9	0	232	295	335	272	2e-07	56
XLOC_002285	NONGGOT019383.1	89.02	346	38	0	898	1243	2100	2445	3e-106	385
XLOC_002286	NONGGOT006571.1	84.91	212	31	1	3362	3572	293	504	7e-38	159
XLOC_002286	NONGGOT020409.1	88.3	94	11	0	18	111	1756	1849	6e-21	99.6
XLOC_002286	NONGGOT012538.1	85.37	294	41	2	508	800	1380	1088	5e-48	190
XLOC_002286	NONGGOT006571.1	84.91	212	31	1	2553	2763	293	504	6e-38	159
XLOC_002287	NONGGOT014978.1	87.61	331	38	2	1	329	831	502	5e-86	317
XLOC_002289	NONGGOT019161.1	88.27	196	22	1	100	295	284	478	2e-50	198
XLOC_002290	NONGGOT001349.1	90.16	61	6	0	14	74	687	747	1e-12	73.8
XLOC_002290	NONGGOT001349.1	90.16	61	6	0	11	71	687	747	1e-12	73.8
XLOC_002291	NONGGOT004326.1	93.88	49	3	0	310	358	1	49	4e-13	73.8
XLOC_002291	NONGGOT004326.1	93.88	49	3	0	852	900	1	49	1e-12	73.8
XLOC_002291	NONGGOT000900.1	100	22	0	0	535	556	1102	1123	0.0008	44.1
XLOC_002292	NONGGOT017510.1	88.71	62	7	0	566	627	446	507	5e-11	67.9
XLOC_002292	NONGGOT017510.1	88.71	62	7	0	142	203	446	507	2e-11	67.9
XLOC_002293	NONGGOT004330.1	90.17	407	28	1	2195	2601	60	454	8e-142	504
XLOC_002294	NONGGOT004330.1	92.82	362	22	3	487	845	831	1191	5e-138	490
XLOC_002297	NONGGOT015663.1	86.89	61	7	1	332	391	822	882	5e-06	50.1
XLOC_002299	NONGGOT004862.1	89.92	129	12	1	1	128	1806	1678	8e-35	145
XLOC_002300	NONGGOT004870.1	89.47	76	7	1	6	80	1590	1515	9e-15	79.8
XLOC_002303	NONGGOT018622.1	100	22	0	0	499	520	883	862	0.001	44.1
XLOC_002305	NONGGOT014908.1	88.95	172	19	0	694	865	430	259	9e-48	190
XLOC_002309	NONGGOT004367.1	93.24	74	5	0	125	198	74	1	9e-23	107
XLOC_002309	NONGGOT004367.1	93.24	74	5	0	125	198	74	1	9e-23	107
XLOC_002310	NONGGOT010297.1	94.25	87	5	0	520	606	9683	9597	2e-30	133
XLOC_002311	NONGGOT014389.1	93.55	62	4	0	186	247	1774	1835	9e-19	91.7
XLOC_002312	NONGGOT004380.1	95.58	113	3	1	200	310	4935	4823	8e-45	178
XLOC_002315	NONGGOT004383.1	90.71	226	20	1	7	231	1510	1285	1e-73	274
XLOC_002322	NONGGOT004392.1	92.49	173	13	0	4314	4486	328	156	3e-62	240
XLOC_002331	NONGGOT010103.1	86.86	137	18	0	151	287	320	184	8e-30	129
XLOC_002332	NONGGOT006899.1	100	22	0	0	123	144	852	831	0.0005	44.1
XLOC_002332	NONGGOT006899.1	100	22	0	0	123	144	852	831	0.0004	44.1
XLOC_002333	NONGGOT014608.1	83.8	179	27	1	719	895	397	219	2e-26	119
XLOC_002333	NONGGOT014608.1	83.8	179	27	1	719	895	397	219	2e-26	119
XLOC_002334	NONGGOT005814.1	88.48	269	31	0	1135	1403	3014	2746	8e-77	287
XLOC_002334	NONGGOT009838.1	84.81	158	24	0	881	1038	1231	1074	1e-27	123
XLOC_002335	NONGGOT014000.1	89.92	129	12	1	13	140	180	52	1e-34	145
XLOC_002336	NONGGOT006098.1	89.29	84	8	1	578	661	246	328	7e-17	87.7
XLOC_002336	NONGGOT006098.1	89.29	84	8	1	253	336	246	328	5e-17	87.7
XLOC_002336	NONGGOT006098.1	89.29	84	8	1	307	390	246	328	8e-17	87.7
XLOC_002337	NONGGOT019571.1	89.24	223	22	1	2	224	204	424	2e-52	204
XLOC_002339	NONGGOT008052.1	100	26	0	0	30	55	326	351	1e-05	52
XLOC_002342	NONGGOT010189.1	89.64	280	27	2	3941	4218	759	1038	7e-83	309
XLOC_002342	NONGGOT003951.1	94.52	73	4	0	75	147	143	71	2e-24	113
XLOC_002342	NONGGOT003951.1	94.52	73	4	0	75	147	143	71	1e-24	113
XLOC_002342	NONGGOT007194.1	83.33	108	16	2	480	585	2747	2640	2e-07	56
XLOC_002344	NONGGOT013730.1	86.08	79	11	0	93	171	94	16	6e-12	69.9
XLOC_002345	NONGGOT010610.1	96.55	29	1	0	1938	1966	1247	1275	3e-05	50.1
XLOC_002346	NONGGOT020155.1	89.94	179	18	0	1	179	761	583	1e-54	212
XLOC_002347	NONGGOT017187.1	100	24	0	0	707	730	319	342	5e-05	48.1
XLOC_002347	NONGGOT020370.1	87.3	63	6	1	853	913	817	755	2e-07	56
XLOC_002347	NONGGOT020370.1	87.3	63	6	1	778	838	817	755	2e-07	56
XLOC_002347	NONGGOT017187.1	100	24	0	0	707	730	319	342	5e-05	48.1
XLOC_002348	NONGGOT000872.1	89.58	48	5	0	45	92	32	79	5e-08	56
XLOC_002350	NONGGOT003966.1	97.43	311	7	1	325	634	1135	1445	8e-155	545
XLOC_002350	NONGGOT003966.1	97.43	311	7	1	752	1061	1135	1445	1e-154	545
XLOC_002351	NONGGOT008939.1	82.84	408	65	2	289	692	1790	1384	4e-64	244
XLOC_002354	NONGGOT015541.1	87.27	110	14	0	10	119	1722	1831	3e-23	107
XLOC_002354	NONGGOT004430.1	89.09	55	6	0	286	340	55	1	2e-09	61.9
XLOC_002355	NONGGOT003892.1	83.52	358	47	5	285	634	1247	894	8e-56	216
XLOC_002355	NONGGOT003892.1	83.52	358	47	5	285	634	1247	894	7e-56	216
XLOC_002356	NONGGOT012262.1	100	29	0	0	1	29	1478	1450	3e-08	58
XLOC_002358	NONGGOT013456.1	89.8	49	5	0	503	551	475	523	3e-08	58
XLOC_002372	NONGGOT012099.1	100	24	0	0	533	556	2995	3018	3e-05	48.1
XLOC_002373	NONGGOT007028.1	82.76	116	13	1	141	256	521	413	1e-13	75.8
XLOC_002374	NONGGOT000555.1	94.12	68	4	0	7	74	720	787	5e-22	103
XLOC_002374	NONGGOT000555.1	94.12	68	4	0	7	74	720	787	5e-22	103
XLOC_002376	NONGGOT004485.1	95.4	174	7	1	159	332	219	47	1e-60	232
XLOC_002376	NONGGOT004485.1	95.4	174	7	1	159	332	219	47	1e-60	232
XLOC_002376	NONGGOT004485.1	95.4	174	7	1	159	332	219	47	2e-60	232
XLOC_002388	NONGGOT010489.1	91.18	170	13	1	1	168	891	722	1e-54	212
XLOC_002389	NONGGOT015061.1	86.44	59	8	0	425	483	158	216	8e-07	54
XLOC_002390	NONGGOT004998.1	89	209	22	1	651	859	1087	880	9e-58	224
XLOC_002390	NONGGOT004998.1	89	209	22	1	651	859	1087	880	9e-58	224
XLOC_002395	NONGGOT009750.1	90.85	142	10	1	32	173	286	148	2e-43	174
XLOC_002395	NONGGOT009750.1	90.38	156	12	1	32	187	286	134	4e-47	186
XLOC_002395	NONGGOT009750.1	90.26	154	12	1	32	185	286	136	1e-45	182
XLOC_002395	NONGGOT009750.1	90.85	142	10	1	32	173	286	148	2e-43	174
XLOC_002401	NONGGOT015634.1	89.25	93	9	1	1319	1411	855	946	9e-20	97.6
XLOC_002401	NONGGOT006132.1	87.1	124	15	1	294	417	2135	2013	5e-26	117
XLOC_002401	NONGGOT006132.1	87.1	124	15	1	294	417	2135	2013	7e-26	117
XLOC_002402	NONGGOT017571.1	96.08	51	2	0	1237	1287	2136	2186	3e-16	85.7
XLOC_002404	NONGGOT016299.1	88.11	244	26	3	1560	1800	522	765	1e-59	230
XLOC_002405	NONGGOT002210.1	96	25	1	0	267	291	361	385	0.001	42.1
XLOC_002407	NONGGOT007424.1	92.86	42	3	0	16	57	144	185	7e-09	60
XLOC_002407	NONGGOT020035.1	98.04	51	1	0	5	55	104	154	5e-19	93.7
XLOC_002407	NONGGOT001117.1	86.39	169	16	2	3	164	347	179	6e-35	147
XLOC_002407	NONGGOT001117.1	86.39	169	16	2	3	164	347	179	6e-35	147
XLOC_002407	NONGGOT001117.1	86.39	169	16	2	3	164	347	179	7e-35	147
XLOC_002413	NONGGOT000908.1	85.31	177	26	0	824	1000	860	684	7e-34	145
XLOC_002414	NONGGOT004536.1	96.53	692	22	2	704	1395	1173	484	0	1166
XLOC_002416	NONGGOT001854.1	100	22	0	0	5	26	64	43	0.0004	44.1
XLOC_002420	NONGGOT008051.1	88.46	78	9	0	104	181	2389	2466	7e-16	83.8
XLOC_002420	NONGGOT012658.1	94	50	2	1	4	53	45	93	3e-11	67.9
XLOC_002423	NONGGOT019130.1	85.94	192	22	2	138	324	14	205	3e-38	157
XLOC_002428	NONGGOT017615.1	97.62	42	1	0	527	568	597	638	2e-13	75.8
XLOC_002432	NONGGOT004604.1	95.14	144	7	0	111	254	206	63	2e-60	230
XLOC_002433	NONGGOT004610.1	98.96	96	1	0	28	123	96	1	3e-46	182
XLOC_002433	NONGGOT004610.1	98.96	96	1	0	299	394	96	1	6e-46	182
XLOC_002436	NONGGOT019574.1	84.68	346	43	3	2451	2787	372	28	1e-54	214
XLOC_002436	NONGGOT019574.1	84.68	346	43	3	2451	2787	372	28	1e-54	214
XLOC_002436	NONGGOT019574.1	84.68	346	43	3	2449	2785	372	28	2e-54	214
XLOC_002438	NONGGOT009013.1	82.08	307	29	5	148	450	2	286	3e-43	174
XLOC_002440	NONGGOT009284.1	89.66	87	9	0	31	117	138	52	1e-21	101
XLOC_002445	NONGGOT008052.1	100	26	0	0	367	392	2036	2061	2e-06	52
XLOC_002446	NONGGOT020627.1	88.37	43	5	0	610	652	412	370	0.0002	46.1
XLOC_002447	NONGGOT000996.1	100	29	0	0	690	718	3268	3240	4e-08	58
XLOC_002449	NONGGOT008310.1	100	28	0	0	1423	1450	374	401	4e-07	56
XLOC_002449	NONGGOT008310.1	100	28	0	0	1211	1238	374	401	3e-07	56
XLOC_002451	NONGGOT017363.1	96.3	27	1	0	1051	1077	299	273	0.0002	46.1
XLOC_002452	NONGGOT004634.1	96.61	59	2	0	38	96	135	77	1e-21	101
XLOC_002453	NONGGOT004645.1	100	63	0	0	110	172	201	139	2e-28	125
XLOC_002454	NONGGOT004646.1	93.88	147	9	0	1	147	148	2	1e-57	220
XLOC_002455	NONGGOT004650.1	89.77	215	16	3	633	844	384	173	4e-61	234
XLOC_002456	NONGGOT004653.1	89.19	111	12	0	562	672	556	446	2e-28	125
XLOC_002458	NONGGOT019163.1	92.68	41	3	0	10	50	1250	1290	6e-08	58
XLOC_002460	NONGGOT002292.1	92.52	147	8	1	43	189	2756	2899	5e-51	200
XLOC_002460	NONGGOT002292.1	92.52	147	8	1	43	189	2756	2899	5e-51	200
XLOC_002460	NONGGOT002292.1	92.52	147	8	1	43	189	2756	2899	6e-51	200
XLOC_002461	NONGGOT008901.1	84.69	294	45	0	296	589	886	593	1e-58	226
XLOC_002465	NONGGOT003449.1	89.14	175	19	0	1018	1192	2942	2768	2e-49	196
XLOC_002470	NONGGOT006611.1	89.06	64	7	0	212	275	297	360	2e-12	71.9
XLOC_002470	NONGGOT006611.1	89.06	64	7	0	212	275	297	360	2e-12	71.9
XLOC_002472	NONGGOT006132.1	90.12	81	7	1	565	644	2063	1983	3e-17	89.7
XLOC_002476	NONGGOT008238.1	88.46	104	12	0	383	486	2025	2128	2e-24	111
XLOC_002479	NONGGOT011180.1	82.56	195	32	1	370	564	1144	1336	6e-24	111
XLOC_002479	NONGGOT011180.1	82.56	195	32	1	370	564	1144	1336	5e-24	111
XLOC_002479	NONGGOT011180.1	82.56	195	32	1	370	564	1144	1336	6e-24	111
XLOC_002479	NONGGOT011180.1	82.56	195	32	1	370	564	1144	1336	6e-24	111
XLOC_002479	NONGGOT011180.1	82.56	195	32	1	370	564	1144	1336	6e-24	111
XLOC_002482	NONGGOT014416.1	85.81	148	21	0	218	365	2797	2650	2e-28	127
XLOC_002482	NONGGOT014416.1	85.81	148	21	0	218	365	2797	2650	1e-28	127
XLOC_002482	NONGGOT014416.1	85.81	148	21	0	218	365	2797	2650	1e-28	127
XLOC_002483	NONGGOT020351.1	91.07	56	5	0	42	97	561	506	2e-12	71.9
XLOC_002485	NONGGOT005905.1	89.58	48	2	1	1100	1147	526	570	5e-06	52
XLOC_002486	NONGGOT010559.1	91.3	46	4	0	505	550	1526	1481	1e-08	60
XLOC_002486	NONGGOT010559.1	91.3	46	4	0	656	701	1526	1481	2e-08	60
XLOC_002486	NONGGOT010559.1	91.3	46	4	0	630	675	1526	1481	2e-08	60
XLOC_002486	NONGGOT010559.1	100	25	0	0	123	147	1526	1502	3e-06	50.1
XLOC_002488	NONGGOT004715.1	92.86	84	6	0	384	467	232	149	1e-26	119
XLOC_002488	NONGGOT004715.1	93.02	129	8	1	407	535	232	105	5e-44	176
XLOC_002490	NONGGOT004726.1	95.6	91	4	0	281	371	91	1	8e-36	149
XLOC_002490	NONGGOT004726.1	95.92	98	4	0	251	348	219	122	4e-40	163
XLOC_002491	NONGGOT007403.1	87.96	274	29	3	243	516	790	521	8e-69	260
XLOC_002491	NONGGOT007403.1	87.96	274	29	3	243	516	790	521	7e-69	260
XLOC_002491	NONGGOT007403.1	87.96	274	29	3	243	516	790	521	9e-69	260
XLOC_002491	NONGGOT007403.1	87.96	274	29	3	243	516	790	521	8e-69	260
XLOC_002491	NONGGOT007403.1	87.96	274	29	3	243	516	790	521	9e-69	260
XLOC_002492	NONGGOT014416.1	90.07	272	26	1	1642	1912	2533	2804	1e-85	317
XLOC_002492	NONGGOT014416.1	90.07	272	26	1	1642	1912	2533	2804	2e-85	317
XLOC_002492	NONGGOT014416.1	90.07	272	26	1	1642	1912	2533	2804	2e-85	317
XLOC_002492	NONGGOT014416.1	90.07	272	26	1	1642	1912	2533	2804	2e-85	317
XLOC_002492	NONGGOT014416.1	90.07	272	26	1	1642	1912	2533	2804	2e-85	317
XLOC_002493	NONGGOT001731.1	84.54	207	29	2	4232	4435	800	594	5e-21	103
XLOC_002493	NONGGOT001731.1	84.54	207	29	2	4232	4435	800	594	5e-21	103
XLOC_002494	NONGGOT019219.1	89.01	182	20	0	8	189	762	581	7e-51	202
XLOC_002495	NONGGOT007435.1	93.55	31	2	0	1	31	841	811	7e-05	46.1
XLOC_002495	NONGGOT012345.1	96.97	33	1	0	579	611	1265	1233	3e-08	58
XLOC_002495	NONGGOT012345.1	96.97	33	1	0	358	390	1265	1233	2e-08	58
XLOC_002496	NONGGOT015362.1	91.35	185	16	0	775	959	586	770	7e-63	240
XLOC_002496	NONGGOT019411.1	87.01	77	10	0	818	894	6677	6753	9e-13	73.8
XLOC_002496	NONGGOT015541.1	90.91	110	10	0	1115	1224	1695	1586	2e-32	139
XLOC_002496	NONGGOT007186.1	91.1	146	13	0	1089	1234	1032	887	1e-46	186
XLOC_002500	NONGGOT020359.1	88.84	251	27	1	981	1231	605	854	7e-71	268
XLOC_002500	NONGGOT020359.1	88.84	251	27	1	981	1231	605	854	7e-71	268
XLOC_002501	NONGGOT018255.1	86.55	223	30	0	1	223	1477	1699	2e-52	204
XLOC_002505	NONGGOT020031.1	91.33	173	11	2	1561	1729	1085	913	9e-54	212
XLOC_002505	NONGGOT020031.1	91.33	173	11	2	1561	1729	1085	913	9e-54	212
XLOC_002505	NONGGOT020031.1	91.33	173	11	2	1561	1729	1085	913	5e-54	212
XLOC_002505	NONGGOT020031.1	91.33	173	11	2	1561	1729	1085	913	1e-53	212
XLOC_002505	NONGGOT020031.1	91.33	173	11	2	1561	1729	1085	913	1e-53	212
XLOC_002505	NONGGOT020031.1	91.33	173	11	2	1561	1729	1085	913	1e-53	212
XLOC_002505	NONGGOT020031.1	91.33	173	11	2	1561	1729	1085	913	1e-53	212
XLOC_002506	NONGGOT009224.1	100	23	0	0	612	634	431	409	0.0003	46.1
XLOC_002507	NONGGOT016376.1	93.44	61	4	0	151	211	331	271	3e-18	89.7
XLOC_002509	NONGGOT004794.1	90.1	192	9	1	2	183	300	109	2e-63	240
XLOC_002510	NONGGOT001156.1	92.41	79	6	0	24	102	408	330	2e-23	109
XLOC_002511	NONGGOT004269.1	92.41	79	6	0	2	80	2440	2518	2e-23	109
XLOC_002513	NONGGOT017134.1	93.94	33	2	0	1	33	386	418	7e-06	50.1
XLOC_002514	NONGGOT004298.1	87.31	134	17	0	431	564	3	136	3e-30	131
XLOC_002516	NONGGOT004822.1	91.55	142	12	0	347	488	245	104	4e-47	186
XLOC_002517	NONGGOT009271.1	86.75	151	20	0	1603	1753	704	854	9e-33	141
XLOC_002517	NONGGOT009271.1	86.75	151	20	0	1704	1854	704	854	9e-33	141
XLOC_002517	NONGGOT009271.1	86.75	151	20	0	1632	1782	704	854	9e-33	141
XLOC_002517	NONGGOT009271.1	86.75	151	20	0	1197	1347	704	854	7e-33	141
XLOC_002522	NONGGOT004489.1	89.09	55	6	0	588	642	3	57	2e-09	61.9
XLOC_002524	NONGGOT004836.1	88.21	195	23	0	432	626	2134	1940	3e-52	204
XLOC_002524	NONGGOT004836.1	90.04	452	43	1	432	881	2134	1683	3e-151	533
XLOC_002524	NONGGOT004836.1	90.36	560	49	1	705	1264	1137	583	0	682
XLOC_002524	NONGGOT004836.1	91.18	510	45	0	1155	1664	1137	628	0	654
XLOC_002524	NONGGOT004836.1	91.1	888	72	5	616	1498	2401	1516	0	1098
XLOC_002527	NONGGOT000691.1	100	27	0	0	360	386	2344	2370	4e-07	54
XLOC_002530	NONGGOT013293.1	93.94	33	2	0	1158	1190	241	209	2e-05	50.1
XLOC_002530	NONGGOT013293.1	93.94	33	2	0	364	396	241	209	2e-05	50.1
XLOC_002530	NONGGOT013293.1	93.94	33	2	0	451	483	241	209	2e-05	50.1
XLOC_002534	NONGGOT000923.1	96.15	26	1	0	324	349	3177	3202	0.0004	44.1
XLOC_002534	NONGGOT000923.1	96.15	26	1	0	749	774	3177	3202	0.0007	44.1
XLOC_002537	NONGGOT002292.1	94.44	54	3	0	215	268	2902	2849	3e-16	83.8
XLOC_002538	NONGGOT017617.1	100	26	0	0	22	47	529	504	1e-06	52
XLOC_002539	NONGGOT001188.1	89.13	92	10	0	665	756	413	322	1e-21	103
XLOC_002542	NONGGOT000399.1	91.53	59	5	0	76	134	560	502	3e-14	77.8
XLOC_002543	NONGGOT013987.1	92.98	57	4	0	189	245	74	130	9e-16	81.8
XLOC_002544	NONGGOT011768.1	91.85	319	17	4	6	317	1	317	8e-113	404
XLOC_002548	NONGGOT000948.1	90.14	71	6	1	78	148	363	294	3e-14	77.8
XLOC_002549	NONGGOT004759.1	88.89	54	6	0	545	598	764	817	1e-08	60
XLOC_002550	NONGGOT008266.1	96.2	79	3	0	687	765	26	104	9e-31	133
XLOC_002550	NONGGOT008266.1	96.2	79	3	0	831	909	26	104	1e-30	133
XLOC_002550	NONGGOT008266.1	96.2	79	3	0	491	569	26	104	7e-31	133
XLOC_002550	NONGGOT008266.1	96.2	79	3	0	483	561	26	104	6e-31	133
XLOC_002551	NONGGOT011791.1	91.38	174	15	0	24	197	3	176	7e-59	226
XLOC_002551	NONGGOT011791.1	91.23	171	15	0	19	189	6	176	4e-57	220
XLOC_002551	NONGGOT011791.1	91.48	176	15	0	11	186	1	176	4e-60	230
XLOC_002556	NONGGOT007204.1	89.81	108	11	0	200	307	559	452	3e-29	127
XLOC_002557	NONGGOT020077.1	96.67	60	2	0	111	170	1047	1106	6e-22	103
XLOC_002558	NONGGOT001181.1	90.2	51	5	0	507	557	516	566	4e-09	61.9
XLOC_002559	NONGGOT017809.1	87.4	127	16	0	814	940	1707	1581	4e-28	125
XLOC_002561	NONGGOT003938.1	94.82	328	15	2	321	648	1004	679	4e-141	500
XLOC_002561	NONGGOT003938.1	94.82	328	15	2	647	974	1004	679	5e-141	500
XLOC_002562	NONGGOT011807.1	92.97	128	7	2	325	450	171	298	4e-41	167
XLOC_002562	NONGGOT011807.1	92.97	128	7	2	380	505	171	298	5e-41	167
XLOC_002562	NONGGOT011807.1	92.97	128	7	2	302	427	171	298	4e-41	167
XLOC_002562	NONGGOT011807.1	92.97	128	7	2	343	468	171	298	4e-41	167
XLOC_002562	NONGGOT011807.1	92.97	128	7	2	386	511	171	298	5e-41	167
XLOC_002563	NONGGOT008376.1	91.43	105	8	1	1149	1253	788	685	2e-29	129
XLOC_002563	NONGGOT008376.1	91.43	105	8	1	1047	1151	788	685	2e-29	129
XLOC_002563	NONGGOT008376.1	91.43	105	8	1	636	740	788	685	1e-29	129
XLOC_002564	NONGGOT004272.1	83.05	118	19	1	1662	1779	482	366	2e-10	67.9
XLOC_002564	NONGGOT004272.1	83.05	118	19	1	1309	1426	482	366	1e-10	67.9
XLOC_002564	NONGGOT004272.1	83.05	118	19	1	1119	1236	482	366	1e-10	67.9
XLOC_002567	NONGGOT007058.1	86.15	130	16	2	2022	2150	715	843	5e-20	99.6
XLOC_002567	NONGGOT009339.1	91.49	47	4	0	474	520	1054	1100	2e-09	61.9
XLOC_002568	NONGGOT009314.1	87.55	273	34	0	763	1035	2749	2477	4e-72	272
XLOC_002570	NONGGOT009339.1	96.43	28	1	0	511	538	977	1004	3e-05	48.1
XLOC_002572	NONGGOT005003.1	85.28	265	33	1	960	1224	1120	862	4e-56	218
XLOC_002575	NONGGOT011039.1	87.89	223	27	0	369	591	987	1209	4e-59	228
XLOC_002576	NONGGOT011830.1	91.45	234	20	0	4	237	297	530	4e-83	305
XLOC_002578	NONGGOT012271.1	92.98	57	4	0	91	147	95	39	2e-15	81.8
XLOC_002584	NONGGOT011852.1	93.21	560	36	2	1	559	44	602	0	793
XLOC_002585	NONGGOT012298.1	96.43	56	2	0	66	121	56	1	1e-19	95.6
XLOC_002587	NONGGOT011865.1	93.89	311	12	4	227	535	1	306	6e-123	440
XLOC_002587	NONGGOT011865.1	94.14	273	10	3	114	384	38	306	8e-110	396
XLOC_002587	NONGGOT011865.1	93.98	299	11	4	148	444	1	294	1e-118	424
XLOC_002587	NONGGOT011865.1	94.14	273	10	3	49	319	38	306	7e-110	396
XLOC_002588	NONGGOT004633.1	89.74	39	4	0	486	524	1153	1191	0.0004	46.1
XLOC_002589	NONGGOT020371.1	89.67	184	17	1	3297	3478	1324	1507	9e-53	208
XLOC_002590	NONGGOT011869.1	100	89	0	0	181	269	1	89	6e-44	176
XLOC_002590	NONGGOT011869.1	100	89	0	0	181	269	1	89	4e-44	176
XLOC_002591	NONGGOT011870.1	95.44	285	11	2	1	285	431	713	8e-113	404
XLOC_002596	NONGGOT011234.1	90.77	65	6	0	16	80	783	847	3e-15	81.8
XLOC_002605	NONGGOT012333.1	98.39	62	1	0	97	158	62	1	3e-25	115
XLOC_002605	NONGGOT012333.1	98.39	62	1	0	81	142	62	1	3e-25	115
XLOC_002606	NONGGOT011905.1	95.45	66	3	0	44	109	1	66	2e-23	107
XLOC_002607	NONGGOT018353.1	97.5	40	1	0	261	300	86	47	4e-12	71.9
XLOC_002608	NONGGOT012035.1	88.24	102	12	0	1	102	4259	4158	6e-23	107
XLOC_002608	NONGGOT016246.1	81.61	87	16	0	225	311	114	200	0.0001	46.1
XLOC_002611	NONGGOT012336.1	95.6	182	8	0	887	1068	465	284	4e-80	297
XLOC_002614	NONGGOT012151.1	89.25	93	10	0	5	97	1423	1515	1e-22	105
XLOC_002615	NONGGOT003424.1	88.89	63	7	0	93	155	1120	1182	3e-12	69.9
XLOC_002616	NONGGOT012804.1	93.33	30	2	0	261	290	978	949	0.0004	44.1
XLOC_002622	NONGGOT016256.1	87.5	96	11	1	383	478	711	805	3e-17	87.7
XLOC_002628	NONGGOT007403.1	86.72	271	35	1	1603	1873	521	790	9e-64	244
XLOC_002638	NONGGOT016280.1	86.73	211	28	0	789	999	1510	1720	1e-49	196
XLOC_002639	NONGGOT011364.1	87.96	216	24	1	736	951	542	329	1e-55	216
XLOC_002642	NONGGOT016299.1	92.94	269	19	0	1447	1715	789	521	6e-105	383
XLOC_002643	NONGGOT017207.1	96.15	26	1	0	634	659	101	76	0.0006	44.1
XLOC_002645	NONGGOT020627.1	100	25	0	0	475	499	357	381	1e-05	50.1
XLOC_002645	NONGGOT011992.1	95.55	247	11	0	1243	1489	433	679	1e-111	402
XLOC_002645	NONGGOT011992.1	95.55	247	11	0	964	1210	433	679	1e-111	402
XLOC_002645	NONGGOT011992.1	95.55	247	11	0	1176	1422	433	679	1e-111	402
XLOC_002645	NONGGOT011992.1	95.55	247	11	0	1163	1409	433	679	1e-111	402
XLOC_002645	NONGGOT011992.1	95.55	247	11	0	1024	1270	433	679	1e-111	402
XLOC_002645	NONGGOT011992.1	95.55	247	11	0	1167	1413	433	679	1e-111	402
XLOC_002645	NONGGOT020627.1	100	25	0	0	547	571	357	381	1e-05	50.1
XLOC_002645	NONGGOT020627.1	100	25	0	0	551	575	357	381	1e-05	50.1
XLOC_002645	NONGGOT011992.1	95.55	247	11	0	414	660	433	679	7e-112	402
XLOC_002645	NONGGOT015620.1	100	23	0	0	3	25	927	949	0.0001	46.1
XLOC_002653	NONGGOT012014.1	96.36	357	11	2	129	485	1	355	9e-168	589
XLOC_002653	NONGGOT012014.1	97.5	80	2	0	112	191	1	80	8e-34	143
XLOC_002653	NONGGOT012014.1	95.68	185	7	1	103	287	1	184	7e-80	295
XLOC_002653	NONGGOT012014.1	95.68	185	7	1	95	279	1	184	9e-80	295
XLOC_002655	NONGGOT012021.1	92.38	223	16	1	272	493	1	223	4e-81	299
XLOC_002656	NONGGOT007485.1	90.16	254	24	1	381	634	1784	2036	4e-80	297
XLOC_002656	NONGGOT007485.1	90.16	254	24	1	472	725	1784	2036	5e-80	297
XLOC_002659	NONGGOT005980.1	84.48	58	9	0	66	123	1123	1180	0.0008	44.1
XLOC_002662	NONGGOT018917.1	96.15	26	1	0	61	86	363	338	0.001	44.1
XLOC_002662	NONGGOT018917.1	96.15	26	1	0	61	86	363	338	0.0004	44.1
XLOC_002662	NONGGOT018917.1	96.15	26	1	0	182	207	363	338	0.0005	44.1
XLOC_002663	NONGGOT009452.1	81.52	211	37	1	531	741	1704	1912	1e-21	103
XLOC_002666	NONGGOT017723.1	85.48	241	35	0	10	250	1	241	3e-51	200
XLOC_002668	NONGGOT012032.1	91.11	45	4	0	424	468	520	564	6e-08	58
XLOC_002670	NONGGOT007331.1	81.76	1124	184	10	929	2041	204	1317	1e-143	509
XLOC_002671	NONGGOT011266.1	87.69	260	32	0	2	261	980	721	2e-69	262
XLOC_002671	NONGGOT011266.1	88.96	154	17	0	2	155	874	721	7e-42	170
XLOC_002671	NONGGOT015495.1	84.24	203	30	2	447	648	1158	957	1e-30	133
XLOC_002673	NONGGOT012040.1	91.64	742	54	6	1	737	503	1241	0	936
XLOC_002676	NONGGOT001737.1	100	22	0	0	224	245	3143	3122	0.0002	44.1
XLOC_002678	NONGGOT008929.1	90.59	170	12	3	2503	2669	2440	2608	9e-47	188
XLOC_002678	NONGGOT008929.1	90.59	170	12	3	2373	2539	2440	2608	9e-47	188
XLOC_002678	NONGGOT008929.1	90.59	170	12	3	1687	1853	2440	2608	7e-47	188
XLOC_002678	NONGGOT008929.1	90.59	170	12	3	1450	1616	2440	2608	7e-47	188
XLOC_002678	NONGGOT008929.1	90.59	170	12	3	1454	1620	2440	2608	7e-47	188
XLOC_002680	NONGGOT010188.1	93.59	234	13	1	7	238	341	574	2e-79	297
XLOC_002680	NONGGOT010188.1	93.12	160	9	1	3	160	415	574	9e-59	224
XLOC_002680	NONGGOT012045.1	90.48	189	12	1	139	327	1	183	3e-61	234
XLOC_002683	NONGGOT009772.1	96.3	27	1	0	425	451	1255	1229	0.0001	46.1
XLOC_002683	NONGGOT009772.1	96.3	27	1	0	269	295	1255	1229	7e-05	46.1
XLOC_002696	NONGGOT017705.1	96.15	26	1	0	348	373	3117	3142	0.0008	44.1
XLOC_002697	NONGGOT000726.1	96.72	61	2	0	927	987	959	899	3e-22	105
XLOC_002697	NONGGOT012095.1	93.46	153	9	1	576	727	1	153	1e-55	216
XLOC_002697	NONGGOT000726.1	96.72	61	2	0	651	711	959	899	2e-22	105
XLOC_002697	NONGGOT007902.1	93.62	282	18	0	776	1057	137	418	2e-115	416
XLOC_002697	NONGGOT007902.1	93.62	282	18	0	1045	1326	137	418	2e-115	416
XLOC_002697	NONGGOT007902.1	93.62	282	18	0	912	1193	137	418	2e-115	416
XLOC_002697	NONGGOT007902.1	93.62	282	18	0	2321	2602	137	418	3e-115	416
XLOC_002697	NONGGOT007902.1	93.62	282	18	0	557	838	137	418	2e-115	416
XLOC_002697	NONGGOT006132.1	88.56	271	26	2	957	1222	1441	1711	3e-75	281
XLOC_002697	NONGGOT007902.1	93.62	282	18	0	663	944	137	418	2e-115	416
XLOC_002697	NONGGOT012095.1	93.46	153	9	1	71	222	1	153	4e-56	216
XLOC_002698	NONGGOT012502.1	97.78	45	1	0	1561	1605	172	128	6e-15	81.8
XLOC_002699	NONGGOT005365.1	100	39	0	0	1	39	936	974	4e-14	77.8
XLOC_002700	NONGGOT012106.1	93.75	112	7	0	85	196	42	153	5e-41	167
XLOC_002703	NONGGOT002392.1	93.55	62	4	0	489	550	2552	2613	2e-18	91.7
XLOC_002705	NONGGOT012189.1	96.61	59	2	0	405	463	127	69	3e-21	101
XLOC_002705	NONGGOT012189.1	96.61	59	2	0	547	605	127	69	4e-21	101
XLOC_002705	NONGGOT012189.1	96.61	59	2	0	405	463	127	69	3e-21	101
XLOC_002705	NONGGOT012189.1	96.61	59	2	0	547	605	127	69	3e-21	101
XLOC_002705	NONGGOT012189.1	96.61	59	2	0	405	463	127	69	3e-21	101
XLOC_002705	NONGGOT012189.1	96.61	59	2	0	405	463	127	69	3e-21	101
XLOC_002705	NONGGOT012189.1	96.61	59	2	0	519	577	127	69	3e-21	101
XLOC_002705	NONGGOT012189.1	96.61	59	2	0	738	796	127	69	5e-21	101
XLOC_002705	NONGGOT012189.1	96.61	59	2	0	62	120	127	69	1e-21	101
XLOC_002705	NONGGOT010886.1	83.82	68	11	0	38	105	378	445	2e-05	48.1
XLOC_002706	NONGGOT019837.1	94.87	39	2	0	338	376	6944	6906	1e-09	61.9
XLOC_002710	NONGGOT007137.1	91.14	79	5	1	282	360	378	302	2e-19	95.6
XLOC_002711	NONGGOT018255.1	95.7	93	4	0	144	236	1473	1565	1e-36	153
XLOC_002713	NONGGOT012234.1	93.87	163	7	1	592	754	876	717	9e-63	240
XLOC_002713	NONGGOT012234.1	89.57	393	18	3	756	1145	612	240	5e-132	470
XLOC_002713	NONGGOT012234.1	96.52	287	9	1	1	287	1161	876	9e-136	482
XLOC_002715	NONGGOT012236.1	97.52	121	3	0	1	121	471	351	2e-56	216
XLOC_002717	NONGGOT016040.1	84.23	279	39	3	46	323	2180	2454	3e-46	184
XLOC_002719	NONGGOT005895.1	94.64	168	9	0	23	190	5	172	2e-69	262
XLOC_002719	NONGGOT005895.1	94.64	168	9	0	23	190	5	172	2e-69	262
XLOC_002721	NONGGOT018378.1	87.5	112	14	0	219	330	47	158	2e-24	111
XLOC_002722	NONGGOT003236.1	93.65	63	4	0	23	85	226	288	3e-19	93.7
XLOC_002723	NONGGOT016918.1	93.75	32	2	0	108	139	684	715	4e-05	48.1
XLOC_002723	NONGGOT008838.1	91.18	102	7	1	1	102	83	182	4e-28	125
XLOC_002723	NONGGOT008838.1	91.18	102	7	1	1	102	83	182	2e-28	125
XLOC_002724	NONGGOT014978.1	89.47	76	8	0	9	84	61	136	3e-17	87.7
XLOC_002725	NONGGOT020163.1	86.55	119	13	1	1013	1131	4594	4709	6e-22	105
XLOC_002726	NONGGOT012270.1	97.5	80	2	0	520	599	180	101	7e-34	143
XLOC_002727	NONGGOT004151.1	94.12	34	2	0	380	413	102	135	1e-06	52
XLOC_002731	NONGGOT007230.1	87.1	93	12	0	881	973	446	354	2e-17	89.7
XLOC_002731	NONGGOT007230.1	87.1	93	12	0	881	973	446	354	2e-17	89.7
XLOC_002733	NONGGOT015003.1	95.65	46	2	0	1	46	116	161	5e-13	75.8
XLOC_002735	NONGGOT020638.1	91.67	48	4	0	298	345	17	64	4e-10	63.9
XLOC_002735	NONGGOT009767.1	86.82	220	22	2	773	985	2862	3081	9e-51	200
XLOC_002735	NONGGOT009767.1	86.82	220	22	2	724	936	2862	3081	1e-50	200
XLOC_002736	NONGGOT012314.1	96.83	126	4	0	49	174	128	3	8e-57	218
XLOC_002737	NONGGOT002691.1	91.07	56	5	0	618	673	1908	1853	5e-12	71.9
XLOC_002739	NONGGOT012320.1	94.55	202	10	1	543	743	524	323	1e-82	305
XLOC_002739	NONGGOT019090.1	96.77	31	1	0	95	125	518	488	3e-07	54
XLOC_002739	NONGGOT012107.1	89.36	141	15	0	320	460	544	684	4e-39	161
XLOC_002739	NONGGOT012320.1	94.55	202	10	1	1058	1258	524	323	2e-82	305
XLOC_002746	NONGGOT012330.1	98.04	51	1	0	1494	1544	118	68	2e-18	93.7
XLOC_002746	NONGGOT012330.1	98	50	1	0	1263	1312	117	68	6e-18	91.7
XLOC_002746	NONGGOT012331.1	92.34	222	8	1	1788	2000	827	606	1e-84	313
XLOC_002746	NONGGOT012331.1	97.18	71	2	0	1423	1493	376	306	5e-28	125
XLOC_002746	NONGGOT012330.1	94.26	122	7	0	1505	1626	447	326	2e-46	186
XLOC_002746	NONGGOT012331.1	95.03	523	15	3	1677	2189	827	306	0	823
XLOC_002747	NONGGOT009774.1	90.77	65	6	0	25	89	953	889	8e-16	81.8
XLOC_002749	NONGGOT014393.1	87.6	258	31	1	1	257	3176	2919	1e-65	250
XLOC_002749	NONGGOT019405.1	83.33	258	42	1	820	1076	3885	3628	2e-39	163
XLOC_002754	NONGGOT012343.1	93.75	176	11	0	394	569	233	58	1e-69	262
XLOC_002754	NONGGOT012343.1	93.75	176	11	0	394	569	233	58	1e-69	262
XLOC_002755	NONGGOT005542.1	94.81	77	4	0	1	77	893	969	2e-27	121
XLOC_002757	NONGGOT011657.1	89.19	111	11	1	76	185	465	355	5e-26	117
XLOC_002763	NONGGOT008721.1	88.37	129	15	0	202	330	7	135	6e-32	137
XLOC_002766	NONGGOT015816.1	93.75	32	2	0	38	69	692	723	4e-05	48.1
XLOC_002768	NONGGOT002294.1	89.72	107	11	0	6	112	265	371	2e-28	125
XLOC_002769	NONGGOT012400.1	95.51	89	4	0	36	124	89	1	2e-34	145
XLOC_002769	NONGGOT012401.1	94.87	117	5	1	153	268	742	626	2e-44	176
XLOC_002770	NONGGOT006864.1	100	23	0	0	295	317	155	133	0.0001	46.1
XLOC_002770	NONGGOT006864.1	100	23	0	0	153	175	155	133	7e-05	46.1
XLOC_002770	NONGGOT006864.1	100	23	0	0	151	173	155	133	7e-05	46.1
XLOC_002770	NONGGOT006864.1	100	23	0	0	417	439	155	133	0.0001	46.1
XLOC_002770	NONGGOT006864.1	100	23	0	0	548	570	155	133	0.0002	46.1
XLOC_002775	NONGGOT012410.1	96.83	189	6	0	419	607	849	661	2e-89	327
XLOC_002775	NONGGOT012410.1	93.71	143	9	0	184	326	1164	1022	1e-54	212
XLOC_002780	NONGGOT003892.1	91.79	195	14	2	340	534	1112	920	3e-64	244
XLOC_002781	NONGGOT009021.1	88.64	273	28	3	160	430	124	395	3e-72	272
XLOC_002781	NONGGOT009021.1	88.64	273	28	3	160	430	124	395	3e-72	272
XLOC_002781	NONGGOT009021.1	88.64	273	28	3	160	430	124	395	3e-72	272
XLOC_002781	NONGGOT009021.1	88.64	273	28	3	160	430	124	395	3e-72	272
XLOC_002781	NONGGOT009021.1	88.64	273	28	3	160	430	124	395	3e-72	272
XLOC_002781	NONGGOT009021.1	88.64	273	28	3	160	430	124	395	3e-72	272
XLOC_002781	NONGGOT009021.1	88.64	273	28	3	160	430	124	395	3e-72	272
XLOC_002782	NONGGOT008721.1	94.23	52	3	0	3	54	17	68	5e-15	79.8
XLOC_002785	NONGGOT019349.1	94.12	51	3	0	423	473	1128	1078	1e-13	77.8
XLOC_002787	NONGGOT012431.1	94.32	176	8	2	35	208	212	37	9e-68	254
XLOC_002789	NONGGOT013812.1	88.33	60	4	2	69	125	572	513	5e-06	50.1
XLOC_002795	NONGGOT012700.1	83.05	118	18	1	237	352	595	712	2e-11	69.9
XLOC_002795	NONGGOT012700.1	83.05	118	18	1	237	352	595	712	2e-11	69.9
XLOC_002795	NONGGOT012700.1	83.05	118	18	1	237	352	595	712	2e-11	69.9
XLOC_002795	NONGGOT019834.1	100	28	0	0	2	29	2207	2234	1e-07	56
XLOC_002796	NONGGOT015103.1	83.2	387	59	3	2200	2580	926	540	1e-60	234
XLOC_002796	NONGGOT004374.1	84.34	198	31	0	1977	2174	534	731	2e-34	147
XLOC_002798	NONGGOT014086.1	89.19	37	4	0	48	84	116	80	0.0008	42.1
XLOC_002799	NONGGOT009451.1	86.13	137	19	0	233	369	2301	2437	3e-27	121
XLOC_002799	NONGGOT009451.1	86.13	137	19	0	138	274	2301	2437	3e-27	121
XLOC_002799	NONGGOT009451.1	86.13	137	19	0	186	322	2301	2437	3e-27	121
XLOC_002800	NONGGOT002320.1	93.94	33	2	0	190	222	152	120	5e-06	50.1
XLOC_002800	NONGGOT004620.1	95.45	66	3	0	386	451	269	204	3e-23	107
XLOC_002802	NONGGOT012558.1	86.32	95	13	0	97	191	201	295	3e-16	85.7
XLOC_002803	NONGGOT002036.1	86.92	130	12	1	251	380	1176	1052	2e-27	123
XLOC_002803	NONGGOT002036.1	86.92	130	12	1	251	380	1176	1052	1e-27	123
XLOC_002803	NONGGOT002036.1	86.92	130	12	1	251	380	1176	1052	1e-27	123
XLOC_002803	NONGGOT002036.1	86.82	129	12	1	251	379	1176	1053	9e-27	121
XLOC_002804	NONGGOT016689.1	93.88	49	3	0	1	49	2566	2518	5e-13	73.8
XLOC_002806	NONGGOT015709.1	96.15	26	1	0	141	166	552	577	0.0003	44.1
XLOC_002810	NONGGOT012485.1	87.82	312	32	2	1	306	1903	1592	5e-84	309
XLOC_002810	NONGGOT012485.1	94.52	146	8	0	74	219	526	381	4e-59	226
XLOC_002810	NONGGOT012485.1	94.52	146	8	0	65	210	526	381	4e-59	226
XLOC_002811	NONGGOT006734.1	100	27	0	0	843	869	146	120	2e-06	54
XLOC_002811	NONGGOT020545.1	96.43	28	1	0	210	237	1037	1010	4e-05	48.1
XLOC_002814	NONGGOT005072.1	96.77	31	1	0	127	157	69	99	6e-07	54
XLOC_002814	NONGGOT005072.1	96.77	31	1	0	127	157	69	99	4e-07	54
XLOC_002815	NONGGOT018252.1	90.83	327	26	3	595	918	353	28	1e-107	389
XLOC_002815	NONGGOT018252.1	90.7	344	27	4	595	934	353	11	1e-110	398
XLOC_002815	NONGGOT018252.1	90.83	327	26	3	595	918	353	28	1e-107	389
XLOC_002815	NONGGOT018252.1	90.59	340	27	4	595	930	353	15	3e-108	391
XLOC_002815	NONGGOT018252.1	90.59	340	27	4	595	930	353	15	3e-108	391
XLOC_002815	NONGGOT018252.1	90.83	327	26	3	595	918	353	28	1e-107	389
XLOC_002819	NONGGOT012697.1	87.04	54	5	1	2590	2643	1858	1807	0.0006	46.1
XLOC_002819	NONGGOT016299.1	91.27	229	19	1	2476	2704	537	764	1e-76	287
XLOC_002819	NONGGOT012697.1	87.04	54	5	1	1363	1416	1858	1807	0.0003	46.1
XLOC_002819	NONGGOT012697.1	87.04	54	5	1	1836	1889	1858	1807	0.0004	46.1
XLOC_002819	NONGGOT016299.1	91.27	229	19	1	589	817	537	764	6e-77	287
XLOC_002820	NONGGOT000852.1	89.9	99	10	0	369	467	574	476	9e-26	117
XLOC_002820	NONGGOT000852.1	91.67	72	6	0	1	72	547	476	4e-19	95.6
XLOC_002822	NONGGOT006049.1	91.11	180	16	0	1102	1281	221	400	9e-60	230
XLOC_002824	NONGGOT015672.1	93.22	59	4	0	970	1028	202	144	3e-16	85.7
XLOC_002825	NONGGOT016299.1	92.34	222	13	1	511	728	781	560	6e-82	303
XLOC_002829	NONGGOT010657.1	88.58	324	32	4	321	641	1	322	6e-87	319
XLOC_002830	NONGGOT019160.1	100	23	0	0	464	486	363	341	0.0002	46.1
XLOC_002830	NONGGOT019051.1	100	35	0	0	1	35	12	46	1e-11	69.9
XLOC_002832	NONGGOT010672.1	93.33	60	4	0	86	145	59	118	6e-17	87.7
XLOC_002832	NONGGOT010672.1	96.03	126	5	0	47	172	556	681	1e-53	210
XLOC_002833	NONGGOT008857.1	90.7	86	8	0	3142	3227	1307	1222	3e-22	107
XLOC_002833	NONGGOT000866.1	88.33	240	28	0	3744	3983	1392	1631	7e-54	212
XLOC_002833	NONGGOT008857.1	90.7	86	8	0	3063	3148	1307	1222	3e-22	107
XLOC_002833	NONGGOT016289.1	85.51	69	10	0	1758	1826	247	315	1e-07	58
XLOC_002833	NONGGOT016289.1	85.51	69	10	0	1860	1928	247	315	1e-07	58
XLOC_002833	NONGGOT004250.1	80.99	142	23	1	949	1086	177	318	3e-10	65.9
XLOC_002833	NONGGOT008857.1	90.7	86	8	0	3499	3584	1307	1222	3e-22	107
XLOC_002833	NONGGOT016289.1	85.51	69	10	0	2277	2345	247	315	1e-07	58
XLOC_002833	NONGGOT008857.1	90.7	86	8	0	2725	2810	1307	1222	2e-22	107
XLOC_002833	NONGGOT016289.1	85.51	69	10	0	416	484	247	315	3e-08	58
XLOC_002836	NONGGOT010463.1	85.71	56	8	0	9	64	115	170	2e-05	48.1
XLOC_002838	NONGGOT010680.1	90.24	82	8	0	86	167	119	200	2e-20	99.6
XLOC_002840	NONGGOT010686.1	87.25	306	16	3	7	290	2085	2389	2e-85	313
XLOC_002841	NONGGOT010686.1	86.35	359	34	1	29	387	5462	5805	3e-94	343
XLOC_002843	NONGGOT014837.1	89.89	89	9	0	1031	1119	103	191	3e-22	105
XLOC_002843	NONGGOT014837.1	89.89	89	9	0	895	983	103	191	3e-22	105
XLOC_002846	NONGGOT002205.1	89.89	89	9	0	579	667	960	1048	2e-22	105
XLOC_002847	NONGGOT009812.1	92.13	89	7	0	648	736	923	1011	6e-27	121
XLOC_002848	NONGGOT012104.1	88.89	225	25	0	61	285	1304	1080	4e-65	248
XLOC_002849	NONGGOT012885.1	94.87	39	2	0	287	325	934	972	2e-09	61.9
XLOC_002851	NONGGOT016811.1	92.06	63	5	0	226	288	91	29	2e-16	85.7
XLOC_002851	NONGGOT010722.1	89.73	146	12	1	80	222	817	962	3e-41	167
XLOC_002851	NONGGOT016811.1	92.06	63	5	0	209	271	91	29	2e-16	85.7
XLOC_002851	NONGGOT016811.1	92.06	63	5	0	214	276	91	29	2e-16	85.7
XLOC_002852	NONGGOT015099.1	84.96	133	19	1	172	303	448	316	6e-20	97.6
XLOC_002853	NONGGOT010730.1	95.18	83	4	0	151	233	1	83	5e-31	133
XLOC_002855	NONGGOT006257.1	85	100	14	1	180	278	3778	3877	1e-12	71.9
XLOC_002859	NONGGOT010758.1	95	120	5	1	116	235	364	482	9e-46	182
XLOC_002859	NONGGOT010758.1	90.98	244	10	3	112	344	240	482	4e-82	303
XLOC_002859	NONGGOT010758.1	90.38	260	10	2	1	246	224	482	3e-89	327
XLOC_002859	NONGGOT010758.1	88	175	7	1	1	161	237	411	2e-50	198
XLOC_002862	NONGGOT010762.1	93.71	175	11	0	1	175	174	348	3e-69	260
XLOC_002866	NONGGOT010771.1	97.27	256	7	0	352	607	115	370	5e-114	410
XLOC_002866	NONGGOT010771.1	94.74	114	4	1	343	454	371	484	7e-43	172
XLOC_002869	NONGGOT010778.1	92.61	568	33	2	5	572	6	564	0	797
XLOC_002869	NONGGOT010778.1	91.18	567	28	1	1	567	20	564	0	761
XLOC_002869	NONGGOT010778.1	94.6	315	17	0	1	315	38	352	6e-138	490
XLOC_002869	NONGGOT010778.1	94.35	283	16	0	1	283	70	352	7e-122	434
XLOC_002871	NONGGOT012392.1	89.01	273	27	2	1426	1696	1945	2216	2e-77	289
XLOC_002871	NONGGOT003956.1	82.18	101	16	1	143	243	163	65	7e-06	52
XLOC_002878	NONGGOT006795.1	85.97	278	34	1	639	916	867	595	2e-54	212
XLOC_002881	NONGGOT020030.1	87.88	264	31	1	17	280	157	419	1e-69	262
XLOC_002882	NONGGOT006236.1	93.55	62	4	0	376	437	2392	2453	2e-18	91.7
XLOC_002885	NONGGOT009758.1	88.84	224	23	1	90	313	371	150	1e-62	240
XLOC_002885	NONGGOT017615.1	90.91	55	5	0	242	296	490	544	1e-11	69.9
XLOC_002887	NONGGOT010760.1	91.67	96	8	0	1298	1393	545	450	1e-28	127
XLOC_002887	NONGGOT010760.1	91.67	96	8	0	298	393	545	450	6e-29	127
XLOC_002888	NONGGOT005847.1	100	22	0	0	112	133	964	985	0.0002	44.1
XLOC_002890	NONGGOT006694.1	91.22	262	23	0	6	267	610	349	2e-91	337
XLOC_002892	NONGGOT010822.1	92.25	258	20	0	97	354	1	258	4e-97	353
XLOC_002892	NONGGOT010822.1	94.15	171	10	0	36	206	989	1159	2e-69	260
XLOC_002893	NONGGOT010825.1	95	320	11	1	2	321	29	343	1e-129	460
XLOC_002895	NONGGOT011345.1	93.75	464	13	5	1931	2381	1590	1130	0	672
XLOC_002902	NONGGOT017629.1	100	31	0	0	7	37	114	84	2e-09	61.9
XLOC_002902	NONGGOT015242.1	100	22	0	0	243	264	3604	3625	0.0002	44.1
XLOC_002904	NONGGOT020163.1	88.67	203	22	1	471	673	5720	5921	1e-54	212
XLOC_002904	NONGGOT003432.1	100	37	0	0	65	101	1257	1293	1e-12	73.8
XLOC_002904	NONGGOT010859.1	94.92	59	3	0	1	59	104	162	7e-19	93.7
XLOC_002905	NONGGOT020351.1	90.3	268	24	2	1565	1831	507	773	2e-83	309
XLOC_002905	NONGGOT016560.1	87.88	66	7	1	547	611	508	573	2e-08	60
XLOC_002905	NONGGOT020351.1	90.3	268	24	2	813	1079	507	773	1e-83	309
XLOC_002905	NONGGOT020351.1	90.3	268	24	2	814	1080	507	773	1e-83	309
XLOC_002907	NONGGOT011368.1	97.22	72	2	0	235	306	752	681	3e-29	127
XLOC_002909	NONGGOT010211.1	87.96	274	26	3	428	700	329	62	1e-70	266
XLOC_002912	NONGGOT019161.1	86.53	245	33	0	1873	2117	280	524	1e-57	224
XLOC_002912	NONGGOT019161.1	86.53	245	33	0	1472	1716	280	524	8e-58	224
XLOC_002914	NONGGOT010890.1	94.74	57	3	0	1	57	150	206	3e-18	89.7
XLOC_002916	NONGGOT019571.1	96	50	2	0	338	387	379	428	4e-16	83.8
XLOC_002919	NONGGOT020280.1	93.67	79	3	1	330	406	342	264	2e-24	111
XLOC_002923	NONGGOT012574.1	88.64	44	5	0	257	300	13	56	2e-05	48.1
XLOC_002924	NONGGOT001100.1	93.75	48	3	0	783	830	323	370	6e-12	71.9
XLOC_002925	NONGGOT008183.1	86.89	122	16	0	280	401	606	727	7e-25	115
XLOC_002925	NONGGOT014389.1	100	24	0	0	164	187	1789	1766	4e-05	48.1
XLOC_002926	NONGGOT010252.1	100	25	0	0	383	407	778	802	6e-06	50.1
XLOC_002927	NONGGOT003801.1	83.33	192	25	4	28	215	539	351	4e-21	101
XLOC_002933	NONGGOT001225.1	90.48	63	6	0	628	690	174	236	4e-14	77.8
XLOC_002933	NONGGOT010428.1	86.33	256	31	3	1127	1382	2294	2545	5e-53	208
XLOC_002933	NONGGOT010428.1	86.33	256	31	3	1163	1418	2294	2545	5e-53	208
XLOC_002933	NONGGOT010428.1	86.33	256	31	3	2076	2331	2294	2545	7e-53	208
XLOC_002933	NONGGOT010428.1	86.33	256	31	3	1293	1548	2294	2545	5e-53	208
XLOC_002933	NONGGOT010428.1	86.33	256	31	3	1208	1463	2294	2545	5e-53	208
XLOC_002933	NONGGOT016641.1	100	23	0	0	379	401	295	273	0.0002	46.1
XLOC_002933	NONGGOT010428.1	86.33	256	31	3	1299	1554	2294	2545	5e-53	208
XLOC_002933	NONGGOT010428.1	86.33	256	31	3	850	1105	2294	2545	4e-53	208
XLOC_002933	NONGGOT010428.1	86.33	256	31	3	636	891	2294	2545	4e-53	208
XLOC_002933	NONGGOT010428.1	86.33	256	31	3	603	858	2294	2545	4e-53	208
XLOC_002933	NONGGOT010428.1	86.33	256	31	3	541	796	2294	2545	3e-53	208
XLOC_002933	NONGGOT010428.1	86.33	256	31	3	534	789	2294	2545	3e-53	208
XLOC_002933	NONGGOT010428.1	86.33	256	31	3	433	688	2294	2545	3e-53	208
XLOC_002933	NONGGOT010428.1	86.33	256	31	3	389	644	2294	2545	3e-53	208
XLOC_002939	NONGGOT010540.1	88.39	112	13	0	18	129	1061	950	1e-26	119
XLOC_002940	NONGGOT017667.1	89.69	97	10	0	657	753	845	749	1e-24	113
XLOC_002940	NONGGOT017667.1	89.69	97	10	0	571	667	845	749	9e-25	113
XLOC_002940	NONGGOT017667.1	89.69	97	10	0	657	753	845	749	1e-24	113
XLOC_002941	NONGGOT012347.1	88.57	70	8	0	588	657	2279	2348	2e-13	75.8
XLOC_002942	NONGGOT010939.1	95.83	120	5	0	354	473	11	130	1e-50	198
XLOC_002942	NONGGOT010939.1	94.56	147	8	0	312	458	11	157	2e-59	228
XLOC_002942	NONGGOT010939.1	94.48	145	8	0	304	448	11	155	3e-58	224
XLOC_002948	NONGGOT010956.1	92.76	359	21	4	3	358	127	483	8e-122	434
XLOC_002955	NONGGOT010979.1	99.26	135	1	0	1	135	1043	1177	6e-69	260
XLOC_002955	NONGGOT008860.1	89.42	104	11	0	323	426	259	156	2e-26	119
XLOC_002957	NONGGOT008673.1	93.75	32	2	0	76	107	12	43	1e-05	48.1
XLOC_002959	NONGGOT014565.1	87.5	64	8	0	1005	1068	1190	1253	1e-09	63.9
XLOC_002959	NONGGOT014565.1	87.5	64	8	0	642	705	1190	1253	6e-10	63.9
XLOC_002961	NONGGOT001413.1	93.75	48	3	0	1	48	837	884	1e-12	71.9
XLOC_002964	NONGGOT004062.1	87.5	112	13	1	712	823	883	993	1e-21	103
XLOC_002964	NONGGOT004062.1	87.5	112	13	1	904	1015	883	993	1e-21	103
XLOC_002965	NONGGOT011503.1	91.29	241	16	1	107	342	712	472	8e-85	311
XLOC_002967	NONGGOT005642.1	89.74	39	4	0	262	300	169	131	0.0002	46.1
XLOC_002968	NONGGOT013102.1	92.31	39	3	0	142	180	846	884	2e-07	54
XLOC_002971	NONGGOT012896.1	87.59	282	30	1	1674	1950	992	711	4e-75	281
XLOC_002972	NONGGOT012410.1	94.29	35	2	0	398	432	1096	1130	2e-06	54
XLOC_002972	NONGGOT012410.1	94.29	35	2	0	398	432	1096	1130	1e-06	54
XLOC_002972	NONGGOT004259.1	100	22	0	0	836	857	602	581	0.0007	44.1
XLOC_002972	NONGGOT004259.1	100	22	0	0	691	712	602	581	0.0006	44.1
XLOC_002972	NONGGOT004259.1	100	22	0	0	1119	1140	602	581	0.001	44.1
XLOC_002975	NONGGOT011004.1	92.56	524	28	3	197	711	1	522	0	686
XLOC_002979	NONGGOT003836.1	84.47	103	14	2	885	986	857	756	5e-09	61.9
XLOC_002980	NONGGOT019165.1	86.96	46	6	0	616	661	1134	1179	0.0006	44.1
XLOC_002980	NONGGOT012677.1	94.34	106	6	0	546	651	533	638	2e-39	163
XLOC_002981	NONGGOT008924.1	83.09	136	23	0	933	1068	954	1089	1e-16	87.7
XLOC_002981	NONGGOT008924.1	83.09	136	23	0	1132	1267	954	1089	1e-16	87.7
XLOC_002981	NONGGOT008924.1	83.09	136	23	0	1158	1293	954	1089	1e-16	87.7
XLOC_002984	NONGGOT014978.1	83.17	202	31	1	504	702	757	556	6e-29	127
XLOC_002987	NONGGOT011041.1	94.55	55	3	0	4	58	162	216	1e-16	85.7
XLOC_002998	NONGGOT018715.1	93.94	33	2	0	108	140	821	789	4e-06	50.1
XLOC_002999	NONGGOT020740.1	91.6	262	21	1	259	519	1764	2025	3e-92	337
XLOC_003002	NONGGOT011180.1	92.5	80	6	0	1747	1826	1143	1222	9e-24	111
XLOC_003002	NONGGOT011180.1	92.5	80	6	0	1861	1940	1143	1222	9e-24	111
XLOC_003003	NONGGOT011068.1	88.69	168	12	1	1	161	123	290	2e-47	186
XLOC_003004	NONGGOT011075.1	96.77	341	9	2	78	417	1	340	6e-151	531
XLOC_003004	NONGGOT011075.1	98.08	104	2	0	4	107	1	104	3e-48	190
XLOC_003004	NONGGOT011075.1	96.64	238	7	1	266	502	103	340	6e-99	359
XLOC_003006	NONGGOT007902.1	91.26	286	23	2	2862	3146	137	421	5e-79	295
XLOC_003006	NONGGOT007902.1	91.26	286	23	2	2427	2711	137	421	5e-79	295
XLOC_003006	NONGGOT011084.1	97.85	93	2	0	404	496	578	670	1e-41	168
XLOC_003006	NONGGOT007902.1	91.26	286	23	2	1690	1974	137	421	4e-79	295
XLOC_003006	NONGGOT011084.1	97.85	93	2	0	1203	1295	578	670	3e-41	168
XLOC_003006	NONGGOT007902.1	91.26	286	23	2	2020	2304	137	421	4e-79	295
XLOC_003006	NONGGOT007902.1	91.26	286	23	2	2423	2707	137	421	5e-79	295
XLOC_003006	NONGGOT007902.1	91.26	286	23	2	2043	2327	137	421	4e-79	295
XLOC_003006	NONGGOT007902.1	91.26	286	23	2	2011	2295	137	421	4e-79	295
XLOC_003006	NONGGOT001060.1	100	30	0	0	220	249	338	309	6e-09	60
XLOC_003011	NONGGOT004464.1	87.67	146	18	0	4	149	359	214	8e-35	147
XLOC_003011	NONGGOT004464.1	87.67	146	18	0	4	149	359	214	9e-35	147
XLOC_003011	NONGGOT020686.1	88.95	1059	112	5	1358	2413	2103	3159	0	1098
XLOC_003011	NONGGOT011604.1	96.55	232	8	0	1	232	273	42	4e-110	396
XLOC_003013	NONGGOT011106.1	96.13	155	6	0	358	512	593	747	4e-69	260
XLOC_003017	NONGGOT008022.1	87.8	82	10	0	136	217	30	111	7e-16	83.8
XLOC_003017	NONGGOT008022.1	87.8	82	10	0	136	217	30	111	7e-16	83.8
XLOC_003017	NONGGOT008022.1	87.8	82	10	0	135	216	30	111	4e-16	83.8
XLOC_003017	NONGGOT008022.1	87.8	82	10	0	118	199	30	111	5e-16	83.8
XLOC_003017	NONGGOT009794.1	96.55	29	1	0	230	258	742	714	7e-06	50.1
XLOC_003020	NONGGOT000556.1	86.39	169	23	0	533	701	504	672	1e-36	153
XLOC_003020	NONGGOT000556.1	86.39	169	23	0	474	642	504	672	1e-36	153
XLOC_003022	NONGGOT015444.1	88.41	138	16	0	482	619	1254	1391	6e-35	147
XLOC_003022	NONGGOT009838.1	89.81	216	22	0	726	941	1397	1612	5e-67	254
XLOC_003022	NONGGOT009838.1	89.81	216	22	0	586	801	1397	1612	4e-67	254
XLOC_003026	NONGGOT011647.1	91.28	298	18	3	1	290	13	310	5e-102	371
XLOC_003026	NONGGOT011647.1	91.52	283	16	3	2	276	28	310	3e-98	357
XLOC_003026	NONGGOT011647.1	91.42	338	18	5	11	339	128	463	3e-115	412
XLOC_003027	NONGGOT009284.1	82.81	192	30	2	777	965	55	246	3e-22	105
XLOC_003029	NONGGOT006266.1	82.79	122	20	1	249	369	947	1068	4e-11	67.9
XLOC_003030	NONGGOT014859.1	88.19	237	24	2	1339	1571	238	2	3e-61	236
XLOC_003032	NONGGOT011658.1	87.06	170	10	1	2	159	122	291	4e-44	176
XLOC_003032	NONGGOT011658.1	93.75	32	2	0	1	32	260	291	1e-05	48.1
XLOC_003034	NONGGOT009812.1	86.15	130	17	1	468	597	912	1040	5e-23	107
XLOC_003034	NONGGOT009812.1	86.15	130	17	1	499	628	912	1040	6e-23	107
XLOC_003036	NONGGOT008292.1	87.96	108	13	0	4	111	1486	1379	2e-24	111
XLOC_003037	NONGGOT006928.1	96.3	27	1	0	1298	1324	44	70	0.0003	46.1
XLOC_003038	NONGGOT011671.1	100	38	0	0	409	446	274	311	1e-13	75.8
XLOC_003038	NONGGOT016394.1	86.73	98	13	0	1544	1641	395	298	7e-18	91.7
XLOC_003038	NONGGOT016394.1	86.73	98	13	0	1299	1396	395	298	6e-18	91.7
XLOC_003038	NONGGOT011671.1	88.03	117	9	1	1	117	164	275	2e-27	121
XLOC_003038	NONGGOT011671.1	88.68	106	7	1	4	109	175	275	4e-25	115
XLOC_003038	NONGGOT011671.1	88.46	104	7	1	1	104	177	275	7e-24	111
XLOC_003038	NONGGOT016394.1	86.73	98	13	0	1280	1377	395	298	6e-18	91.7
XLOC_003041	NONGGOT015620.1	91.07	56	5	0	303	358	914	969	2e-12	71.9
XLOC_003042	NONGGOT012149.1	91.36	602	38	2	2540	3140	1349	761	0	789
XLOC_003042	NONGGOT012149.1	91.36	602	38	2	2510	3110	1349	761	0	789
XLOC_003042	NONGGOT012149.1	91.36	602	38	2	1736	2336	1349	761	0	789
XLOC_003042	NONGGOT012149.1	91.36	602	38	2	1646	2246	1349	761	0	789
XLOC_003042	NONGGOT012149.1	91.36	602	38	2	1525	2125	1349	761	0	789
XLOC_003045	NONGGOT006928.1	92.59	54	4	0	102	155	760	813	5e-14	75.8
XLOC_003047	NONGGOT008426.1	88.89	45	5	0	570	614	106	62	1e-05	50.1
XLOC_003047	NONGGOT008426.1	88.89	45	5	0	361	405	106	62	1e-05	50.1
XLOC_003048	NONGGOT001481.1	87.72	57	7	0	1492	1548	912	968	1e-07	58
XLOC_003049	NONGGOT011691.1	91.63	203	17	0	79	281	1	203	4e-71	268
XLOC_003049	NONGGOT011691.1	91.63	203	17	0	32	234	1	203	1e-71	268
XLOC_003049	NONGGOT011691.1	91.63	203	17	0	15	217	1	203	2e-71	268
XLOC_003050	NONGGOT018494.1	94.44	72	3	1	631	701	355	426	8e-22	103
XLOC_003050	NONGGOT018494.1	94.44	72	3	1	551	621	355	426	7e-22	103
XLOC_003052	NONGGOT008880.1	86.78	227	20	3	516	741	386	603	1e-51	202
XLOC_003054	NONGGOT000520.1	87.93	58	7	0	225	282	493	550	8e-09	60
XLOC_003056	NONGGOT020465.1	86.49	74	9	1	246	318	187	260	1e-08	60
XLOC_003056	NONGGOT020465.1	86.49	74	9	1	231	303	187	260	1e-08	60
XLOC_003057	NONGGOT011323.1	96.55	87	3	0	1	87	13	99	1e-35	149
XLOC_003057	NONGGOT020360.1	96.92	65	2	0	1	65	110	46	4e-25	113
XLOC_003063	NONGGOT002924.1	90.48	42	4	0	1455	1496	577	618	9e-06	52
XLOC_003063	NONGGOT014178.1	100	24	0	0	100	123	227	204	4e-05	48.1
XLOC_003068	NONGGOT016102.1	86.96	69	7	1	853	919	1589	1657	1e-08	60
XLOC_003069	NONGGOT020523.1	85.93	135	19	0	490	624	156	22	1e-25	117
XLOC_003069	NONGGOT020523.1	85.93	135	19	0	490	624	156	22	1e-25	117
XLOC_003069	NONGGOT008871.1	89.73	146	14	1	1785	1930	622	766	3e-39	163
XLOC_003069	NONGGOT011457.1	92.11	38	3	0	338	375	655	618	4e-06	52
XLOC_003069	NONGGOT011457.1	92.11	38	3	0	338	375	655	618	4e-06	52
XLOC_003070	NONGGOT011169.1	88.22	331	38	1	149	478	463	133	8e-93	339
XLOC_003070	NONGGOT011169.1	88.22	331	38	1	149	478	463	133	6e-93	339
XLOC_003071	NONGGOT011262.1	88.35	266	27	2	336	601	1234	1495	8e-72	270
XLOC_003072	NONGGOT013109.1	83.86	477	62	5	14	489	3560	4022	3e-85	315
XLOC_003072	NONGGOT006788.1	90	110	10	1	166	275	921	813	2e-27	123
XLOC_003072	NONGGOT010655.1	84.18	373	22	5	2960	3296	567	938	5e-79	295
XLOC_003072	NONGGOT010655.1	84.18	373	22	5	2764	3100	567	938	4e-79	295
XLOC_003072	NONGGOT011170.1	96.28	215	8	0	2996	3210	226	12	2e-99	363
XLOC_003072	NONGGOT010655.1	87.28	346	24	3	1	326	147	492	3e-95	347
XLOC_003072	NONGGOT010655.1	85.29	612	52	6	982	1557	567	1176	2e-145	515
XLOC_003072	NONGGOT011170.1	96.28	215	8	0	418	632	226	12	5e-100	363
XLOC_003072	NONGGOT011170.1	96.28	215	8	0	571	785	226	12	7e-100	363
XLOC_003073	NONGGOT010006.1	84.72	72	10	1	180	251	1082	1152	5e-05	48.1
XLOC_003073	NONGGOT010006.1	84.72	72	10	1	205	276	1082	1152	5e-05	48.1
XLOC_003073	NONGGOT020597.1	96	25	1	0	184	208	659	683	0.0007	42.1
XLOC_003079	NONGGOT009767.1	91.96	224	17	1	628	850	2859	3082	2e-78	293
XLOC_003080	NONGGOT000235.1	100	30	0	0	1	30	155	126	4e-09	60
XLOC_003084	NONGGOT011180.1	87.8	369	34	6	1329	1695	475	116	1e-91	337
XLOC_003087	NONGGOT010821.1	89.86	69	6	1	381	448	1022	954	1e-12	73.8
XLOC_003087	NONGGOT010821.1	89.86	69	6	1	381	448	1022	954	1e-12	73.8
XLOC_003089	NONGGOT011198.1	93.94	231	9	2	517	747	285	60	3e-92	337
XLOC_003089	NONGGOT011199.1	93.67	221	14	0	600	820	306	86	3e-89	327
XLOC_003089	NONGGOT011199.1	93	343	19	1	595	937	423	86	5e-138	490
XLOC_003089	NONGGOT011199.1	93	343	19	1	595	937	423	86	4e-138	490
XLOC_003089	NONGGOT011198.1	96.1	77	3	0	517	593	285	209	1e-29	129
XLOC_003089	NONGGOT011199.1	93.12	654	39	2	388	1040	734	86	0	932
XLOC_003091	NONGGOT014053.1	96.3	27	1	0	190	216	283	257	6e-05	46.1
XLOC_003093	NONGGOT009631.1	88.57	70	8	0	1272	1341	300	369	4e-13	75.8
XLOC_003096	NONGGOT011224.1	91.51	212	16	1	282	491	453	242	1e-72	272
XLOC_003096	NONGGOT011223.1	95.13	267	13	0	6	272	789	523	4e-119	426
XLOC_003100	NONGGOT011232.1	94.49	127	7	0	221	347	127	1	5e-50	196
XLOC_003101	NONGGOT002796.1	100	26	0	0	1676	1701	76	101	2e-05	52
XLOC_003101	NONGGOT002796.1	100	26	0	0	1676	1701	76	101	2e-05	52
XLOC_003101	NONGGOT002796.1	100	26	0	0	1676	1701	76	101	2e-05	52
XLOC_003101	NONGGOT002796.1	100	26	0	0	1676	1701	76	101	2e-05	52
XLOC_003101	NONGGOT002796.1	100	26	0	0	1676	1701	76	101	2e-05	52
XLOC_003101	NONGGOT002796.1	100	26	0	0	1676	1701	76	101	2e-05	52
XLOC_003101	NONGGOT002796.1	100	26	0	0	1676	1701	76	101	2e-05	52
XLOC_003101	NONGGOT002796.1	100	26	0	0	1676	1701	76	101	2e-05	52
XLOC_003102	NONGGOT014416.1	88.57	140	16	0	758	897	2661	2800	5e-36	151
XLOC_003102	NONGGOT014416.1	88.57	140	16	0	656	795	2661	2800	4e-36	151
XLOC_003103	NONGGOT003173.1	97.67	43	1	0	1796	1838	3	45	2e-13	77.8
XLOC_003103	NONGGOT012104.1	87.5	208	25	1	3227	3433	1098	1305	1e-49	198
XLOC_003104	NONGGOT020740.1	97.96	49	1	0	1	49	3573	3621	2e-17	89.7
XLOC_003104	NONGGOT020740.1	97.96	49	1	0	1	49	3573	3621	9e-18	89.7
XLOC_003104	NONGGOT013212.1	94.87	39	2	0	30	68	296	334	1e-09	61.9
XLOC_003107	NONGGOT001585.1	86.1	223	27	1	332	554	968	1186	3e-49	194
XLOC_003110	NONGGOT013732.1	91.43	35	3	0	248	282	123	157	0.0002	46.1
XLOC_003110	NONGGOT013732.1	91.43	35	3	0	248	282	123	157	0.0002	46.1
XLOC_003111	NONGGOT011295.1	95	80	4	0	4	83	251	172	2e-29	127
XLOC_003114	NONGGOT008590.1	91.89	37	3	0	4	40	79	115	1e-05	50.1
XLOC_003114	NONGGOT008590.1	91.89	37	3	0	4	40	79	115	1e-05	50.1
XLOC_003114	NONGGOT008590.1	91.89	37	3	0	4	40	79	115	1e-05	50.1
XLOC_003114	NONGGOT008590.1	91.89	37	3	0	4	40	79	115	2e-05	50.1
XLOC_003119	NONGGOT018715.1	84.71	85	13	0	510	594	409	493	2e-10	65.9
XLOC_003121	NONGGOT010793.1	91.94	62	5	0	577	638	175	236	7e-16	83.8
XLOC_003121	NONGGOT010793.1	91.94	62	5	0	219	280	175	236	4e-16	83.8
XLOC_003121	NONGGOT012483.1	91.89	111	9	0	188	298	399	289	1e-35	149
XLOC_003121	NONGGOT012483.1	91.89	111	9	0	188	298	399	289	1e-35	149
XLOC_003121	NONGGOT012483.1	91.89	111	9	0	188	298	399	289	2e-35	149
XLOC_003121	NONGGOT012483.1	91.89	111	9	0	188	298	399	289	2e-35	149
XLOC_003123	NONGGOT009754.1	84.98	213	24	1	47	259	1853	1649	2e-43	174
XLOC_003124	NONGGOT016299.1	88.1	269	32	0	1821	2089	521	789	3e-74	280
XLOC_003124	NONGGOT016299.1	88.1	269	32	0	1821	2089	521	789	3e-74	280
XLOC_003130	NONGGOT015728.1	88.33	60	7	0	216	275	29	88	1e-09	63.9
XLOC_003130	NONGGOT015728.1	88.33	60	7	0	269	328	29	88	1e-09	63.9
XLOC_003130	NONGGOT015728.1	88.33	60	7	0	260	319	29	88	1e-09	63.9
XLOC_003132	NONGGOT013031.1	91.53	59	5	0	176	234	351	293	2e-14	77.8
XLOC_003134	NONGGOT009264.1	84.9	245	20	4	2016	2260	542	315	3e-46	186
XLOC_003136	NONGGOT005583.1	96.15	26	1	0	177	202	1247	1222	0.001	44.1
XLOC_003138	NONGGOT009009.1	81.95	604	79	8	1735	2314	2059	2656	2e-84	313
XLOC_003138	NONGGOT009009.1	81.95	604	79	8	1735	2314	2059	2656	2e-84	313
XLOC_003138	NONGGOT015444.1	90.23	266	26	0	4984	5249	2997	3262	2e-86	321
XLOC_003139	NONGGOT002860.1	91.67	36	3	0	3433	3468	1217	1182	0.0002	48.1
XLOC_003139	NONGGOT002860.1	91.67	36	3	0	3527	3562	1217	1182	0.0002	48.1
XLOC_003139	NONGGOT014565.1	89.89	89	9	0	12	100	2285	2373	4e-22	105
XLOC_003140	NONGGOT020573.1	89.55	67	7	0	1	67	1545	1479	2e-14	77.8
XLOC_003144	NONGGOT015588.1	100	62	0	0	1	62	334	395	9e-28	123
XLOC_003147	NONGGOT000904.1	94.74	38	2	0	6	43	116	79	2e-08	60
XLOC_003149	NONGGOT003650.1	85.13	269	40	0	457	725	510	242	1e-55	216
XLOC_003150	NONGGOT011376.1	94.94	237	10	1	68	302	237	1	1e-101	369
XLOC_003150	NONGGOT011376.1	94.67	225	10	1	68	290	237	13	2e-94	345
XLOC_003150	NONGGOT011376.1	95.69	557	20	2	1092	1644	568	12	0	902
XLOC_003150	NONGGOT011376.1	96.65	448	13	1	1092	1537	568	121	0	763
XLOC_003150	NONGGOT011376.1	97.52	121	3	0	104	224	237	117	5e-56	216
XLOC_003153	NONGGOT011379.1	96.09	230	9	0	18	247	704	475	8e-107	385
XLOC_003154	NONGGOT006928.1	91.67	120	10	0	788	907	170	51	2e-38	159
XLOC_003156	NONGGOT020031.1	91.26	206	12	2	1013	1213	872	1076	7e-68	258
XLOC_003156	NONGGOT020031.1	91.26	206	12	2	1013	1213	872	1076	7e-68	258
XLOC_003158	NONGGOT016471.1	90.91	99	9	0	2482	2580	68	166	8e-28	125
XLOC_003158	NONGGOT016471.1	90.91	99	9	0	2546	2644	68	166	8e-28	125
XLOC_003159	NONGGOT007830.1	98.08	52	1	0	8	59	518	569	3e-19	95.6
XLOC_003159	NONGGOT007830.1	98.08	52	1	0	8	59	518	569	3e-19	95.6
XLOC_003161	NONGGOT009767.1	100	29	0	0	3	31	426	454	2e-08	58
XLOC_003162	NONGGOT018411.1	90.54	74	7	0	1	74	886	959	2e-18	91.7
XLOC_003163	NONGGOT016521.1	96.15	26	1	0	488	513	300	275	0.0008	44.1
XLOC_003164	NONGGOT001168.1	92.94	85	6	0	473	557	1223	1307	3e-27	121
XLOC_003166	NONGGOT010927.1	100	25	0	0	82	106	128	152	7e-06	50.1
XLOC_003169	NONGGOT011412.1	98.53	204	3	0	189	392	273	70	1e-105	381
XLOC_003170	NONGGOT004128.1	91.08	213	18	1	825	1037	1224	1013	2e-61	236
XLOC_003171	NONGGOT016494.1	92.96	71	5	0	467	537	193	123	3e-21	101
XLOC_003171	NONGGOT016494.1	92.96	71	5	0	467	537	193	123	4e-21	101
XLOC_003172	NONGGOT009376.1	88.69	221	23	2	1	220	513	294	4e-58	224
XLOC_003175	NONGGOT001492.1	92.04	113	9	0	1211	1323	530	418	3e-36	153
XLOC_003175	NONGGOT001492.1	92.04	113	9	0	1211	1323	530	418	4e-36	153
XLOC_003175	NONGGOT001492.1	92.04	113	9	0	1211	1323	530	418	4e-36	153
XLOC_003175	NONGGOT001492.1	92.04	113	9	0	1211	1323	530	418	4e-36	153
XLOC_003175	NONGGOT001492.1	92.04	113	9	0	1211	1323	530	418	4e-36	153
XLOC_003175	NONGGOT001492.1	92.04	113	9	0	1211	1323	530	418	4e-36	153
XLOC_003175	NONGGOT001492.1	92.04	113	9	0	1211	1323	530	418	3e-36	153
XLOC_003175	NONGGOT001492.1	92.04	113	9	0	1211	1323	530	418	4e-36	153
XLOC_003177	NONGGOT010032.1	89.8	49	5	0	547	595	1256	1208	6e-08	58
XLOC_003182	NONGGOT016299.1	93.47	245	12	2	2	243	534	777	2e-86	319
XLOC_003183	NONGGOT010959.1	90.67	150	13	1	771	920	105	253	2e-44	178
XLOC_003183	NONGGOT010959.1	90.67	150	13	1	503	652	105	253	2e-44	178
XLOC_003187	NONGGOT002208.1	84.86	251	37	1	1304	1554	303	54	8e-47	188
XLOC_003188	NONGGOT020595.1	96.43	28	1	0	2114	2141	584	611	0.0001	48.1
XLOC_003191	NONGGOT020001.1	87.01	154	18	1	59	210	201	48	5e-33	141
XLOC_003192	NONGGOT014589.1	89.73	185	18	1	1	185	799	616	2e-53	208
XLOC_003192	NONGGOT015661.1	82.35	119	21	0	46	164	397	279	2e-11	69.9
[truncated: 6,389 more rows]

## Sheet: Human
LncRNA	Human_LncRNA	Identity	Length	Mismatch	Gap	Q_start	Q_end	O_start	O_end	E-value	Score
XLOC_000001	NONHSAT199671.1	90.12	1083	105	1	101	1181	3310	4392	0	1292
XLOC_000001	NONHSAT199671.1	89.11	1368	127	2	30	1375	3025	4392	0	1554
XLOC_000002	NONHSAT164134.1	88.98	245	19	4	1305	1541	4956	5200	6e-64	248
XLOC_000002	NONHSAT164134.1	88.98	245	19	4	826	1062	4956	5200	5e-64	248
XLOC_000002	NONHSAT164134.1	88.98	245	19	4	787	1023	4956	5200	5e-64	248
XLOC_000002	NONHSAT164134.1	88.98	245	19	4	776	1012	4956	5200	5e-64	248
XLOC_000004	NONHSAT154639.1	85.39	89	7	1	1061	1149	3542	3624	5e-12	75.8
XLOC_000005	NONHSAT210177.1	96.67	30	1	0	485	514	3290	3261	2e-05	52
XLOC_000008	NONHSAT094596.2	93.1	87	6	0	114	200	119	205	6e-28	125
XLOC_000009	NONHSAT198150.1	97.73	484	10	1	5	488	928	446	0	864
XLOC_000010	NONHSAT094518.2	91.67	48	4	0	180	227	611	658	2e-09	63.9
XLOC_000011	NONHSAT148205.1	92.19	128	9	1	90	217	4234	4360	3e-40	167
XLOC_000013	NONHSAT189136.1	91.76	255	18	1	447	698	1737	1483	2e-90	335
XLOC_000015	NONHSAT000338.2	92.12	622	41	3	396	1017	267	880	0	785
XLOC_000015	NONHSAT000338.2	92.12	622	41	3	487	1108	267	880	0	785
XLOC_000015	NONHSAT000338.2	92.12	622	41	3	369	990	267	880	0	785
XLOC_000015	NONHSAT000338.2	92.12	622	41	3	665	1286	267	880	0	785
XLOC_000016	NONHSAT000371.2	86.47	473	31	4	189	638	95	557	7e-127	456
XLOC_000016	NONHSAT000371.2	89.51	324	31	2	946	1267	589	911	2e-97	359
XLOC_000017	NONHSAT150977.1	93.48	890	56	2	1	888	316	1205	0	1289
XLOC_000017	NONHSAT150977.1	94.35	513	28	1	141	652	437	949	0	779
XLOC_000018	NONHSAT148241.1	93.16	380	25	1	117	495	265	644	5e-152	539
XLOC_000018	NONHSAT148241.1	93.01	386	26	1	17	401	259	644	3e-153	543
XLOC_000018	NONHSAT148241.1	92.99	385	26	1	15	398	260	644	1e-152	541
XLOC_000018	NONHSAT148241.1	92.48	412	29	2	87	496	233	644	8e-157	555
XLOC_000020	NONHSAT105129.2	91.03	435	38	1	59	493	731	298	5e-154	545
XLOC_000022	NONHSAT000567.2	92.27	220	13	2	33	248	70	289	9e-77	289
XLOC_000022	NONHSAT000567.2	92.12	241	15	2	7	243	49	289	2e-84	315
XLOC_000022	NONHSAT000567.2	92.27	220	13	2	20	235	70	289	9e-77	289
XLOC_000023	NONHSAT148260.1	91.27	332	24	3	1862	2191	390	718	5e-112	408
XLOC_000023	NONHSAT148260.1	90.94	309	23	3	1316	1622	413	718	8e-101	371
XLOC_000023	NONHSAT148260.1	95.77	71	3	0	39	109	167	237	4e-25	117
XLOC_000023	NONHSAT148260.1	97.37	38	1	0	1	38	199	236	2e-10	67.9
XLOC_000023	NONHSAT148260.1	91.27	332	24	3	352	681	390	718	3e-112	408
XLOC_000023	NONHSAT148260.1	91.27	332	24	3	202	531	390	718	2e-112	408
XLOC_000024	NONHSAT148260.1	97.83	46	1	0	112	157	2087	2132	6e-15	83.8
XLOC_000024	NONHSAT148260.1	89.39	132	14	0	1	132	739	870	3e-35	151
XLOC_000025	NONHSAT201332.1	82.72	1684	211	18	3417	5042	11591	13252	0	969
XLOC_000026	NONHSAT188553.1	96.77	31	1	0	1181	1211	4185	4215	3e-05	54
XLOC_000026	NONHSAT188553.1	96.77	31	1	0	439	469	4185	4215	2e-05	54
XLOC_000027	NONHSAT000628.2	92.34	418	32	0	1	418	418	1	9e-163	575
XLOC_000029	NONHSAT148314.1	99.64	275	1	0	56	330	2	276	2e-151	537
XLOC_000029	NONHSAT148314.1	99.64	276	1	0	115	390	1	276	5e-152	539
XLOC_000029	NONHSAT148314.1	99.64	275	1	0	28	302	2	276	2e-151	537
XLOC_000030	NONHSAT151064.1	96.75	431	14	0	357	787	431	1	0	743
XLOC_000031	NONHSAT141159.2	89.96	239	24	0	113	351	3379	3141	8e-75	283
XLOC_000033	NONHSAT000740.2	94.12	204	11	1	247	450	1	203	2e-80	301
XLOC_000033	NONHSAT148325.1	93.94	198	11	1	1	198	7	203	2e-76	289
XLOC_000034	NONHSAT000741.2	89.92	129	12	1	83	210	129	1	7e-34	145
XLOC_000035	NONHSAT220676.1	88.1	84	10	0	1232	1315	3072	2989	1e-15	87.7
XLOC_000035	NONHSAT220676.1	88.1	84	10	0	1380	1463	3072	2989	1e-15	87.7
XLOC_000035	NONHSAT220676.1	88.1	84	10	0	1302	1385	3072	2989	1e-15	87.7
XLOC_000035	NONHSAT220676.1	88.1	84	10	0	1303	1386	3072	2989	1e-15	87.7
XLOC_000035	NONHSAT220676.1	88.1	84	10	0	773	856	3072	2989	7e-16	87.7
XLOC_000035	NONHSAT220676.1	88.1	84	10	0	712	795	3072	2989	6e-16	87.7
XLOC_000035	NONHSAT220676.1	88.1	84	10	0	744	827	3072	2989	6e-16	87.7
XLOC_000036	NONHSAT000861.2	98.28	58	1	0	274	331	1	58	3e-22	107
XLOC_000036	NONHSAT148356.1	93.71	525	20	2	321	833	67	590	0	785
XLOC_000036	NONHSAT148356.1	93.71	525	20	2	440	952	67	590	0	785
XLOC_000036	NONHSAT148356.1	94.24	573	20	2	216	776	19	590	0	880
XLOC_000037	NONHSAT148374.1	95.66	622	22	3	381	997	28	649	0	999
XLOC_000038	NONHSAT148380.1	94.32	88	5	0	192	279	60	147	1e-30	135
XLOC_000038	NONHSAT148380.1	94.32	88	5	0	187	274	60	147	9e-31	135
XLOC_000038	NONHSAT148380.1	94.44	90	5	0	177	266	60	149	1e-31	139
XLOC_000039	NONHSAT148395.1	95.08	386	18	1	1	386	100	484	1e-172	607
XLOC_000039	NONHSAT148395.1	90.91	396	18	2	1	396	107	484	3e-145	515
XLOC_000039	NONHSAT148395.1	95.57	271	8	1	1	267	214	484	1e-122	440
XLOC_000039	NONHSAT148395.1	90.43	230	5	1	76	305	272	484	4e-82	305
XLOC_000039	NONHSAT148395.1	97.65	213	5	0	76	288	272	484	2e-105	383
XLOC_000039	NONHSAT148395.1	97.67	215	5	0	53	267	270	484	1e-106	387
XLOC_000042	NONHSAT000976.2	97.33	75	2	0	169	243	373	447	3e-30	133
XLOC_000045	NONHSAT148497.1	91.47	387	31	2	23	408	186	571	3e-137	490
XLOC_000045	NONHSAT148497.1	91.47	387	31	2	23	408	186	571	4e-137	490
XLOC_000045	NONHSAT148497.1	92.39	92	7	0	1	92	480	571	3e-28	127
XLOC_000045	NONHSAT148497.1	92.39	92	7	0	1	92	480	571	3e-28	127
XLOC_000045	NONHSAT152189.1	87.62	307	26	3	111	406	2304	2609	3e-80	301
XLOC_000045	NONHSAT152189.1	91.32	242	20	1	49	289	2687	2928	1e-62	242
XLOC_000045	NONHSAT152189.1	91.18	238	20	1	1	237	2691	2928	3e-60	234
XLOC_000046	NONHSAT006164.2	90.21	235	21	2	380	614	604	836	5e-70	268
XLOC_000046	NONHSAT148497.1	91.55	71	6	0	454	524	820	890	6e-18	93.7
XLOC_000047	NONHSAT001142.2	88.5	226	24	2	1	225	665	889	8e-58	226
XLOC_000047	NONHSAT006459.2	85.44	316	43	2	293	606	184	498	2e-64	248
XLOC_000047	NONHSAT006459.2	85.44	316	43	2	401	714	184	498	3e-64	248
XLOC_000049	NONHSAT151192.1	93.75	128	8	0	66	193	182	55	1e-47	190
XLOC_000051	NONHSAT001257.2	94.37	71	4	0	40	110	72	2	7e-23	109
XLOC_000052	NONHSAT148467.1	93.89	393	22	2	1819	2210	1	392	2e-161	573
XLOC_000053	NONHSAT001281.2	93.09	362	16	2	96	456	554	907	1e-145	517
XLOC_000056	NONHSAT175594.1	85.55	353	49	2	390	741	686	1037	7e-74	280
XLOC_000057	NONHSAT162152.1	90.49	263	21	2	433	694	1029	1288	4e-76	287
XLOC_000057	NONHSAT162152.1	90.49	263	21	2	1878	2139	1029	1288	9e-76	287
XLOC_000058	NONHSAT148510.1	94.5	218	11	1	36	253	99	315	3e-89	329
XLOC_000060	NONHSAT183413.1	93.26	89	6	0	135	223	1327	1415	4e-29	129
XLOC_000061	NONHSAT001537.2	93.49	169	8	1	344	512	233	398	3e-63	244
XLOC_000061	NONHSAT001537.2	93.49	169	8	1	143	311	233	398	2e-63	244
XLOC_000062	NONHSAT203483.1	90.83	109	6	1	1178	1282	1900	1792	4e-30	135
XLOC_000063	NONHSAT001585.2	97.06	34	1	0	129	162	46	13	2e-07	60
XLOC_000063	NONHSAT001585.2	95.65	46	2	0	74	119	46	1	1e-12	75.8
XLOC_000064	NONHSAT148535.1	95.49	133	5	1	23	155	157	288	2e-52	208
XLOC_000065	NONHSAT148560.1	93.26	193	13	0	643	835	158	350	8e-74	280
XLOC_000067	NONHSAT148567.1	100	51	0	0	399	449	184	234	2e-20	101
XLOC_000068	NONHSAT001863.2	94.34	53	3	0	113	165	26	78	1e-14	81.8
XLOC_000068	NONHSAT001863.2	94.34	53	3	0	90	142	26	78	1e-14	81.8
XLOC_000068	NONHSAT128126.2	86.94	268	32	1	99	363	522	255	4e-65	250
XLOC_000069	NONHSAT001863.2	88.24	102	3	1	1	102	125	217	7e-25	115
XLOC_000070	NONHSAT153522.1	98.8	167	2	0	140	306	421	587	5e-85	315
XLOC_000071	NONHSAT223537.1	91.3	184	13	1	1	184	446	266	3e-60	234
XLOC_000072	NONHSAT148598.1	94.63	968	49	2	274	1238	20	987	0	1411
XLOC_000073	NONHSAT211573.1	93.08	260	17	1	4342	4600	1711	1452	9e-99	365
XLOC_000073	NONHSAT002007.2	95.42	153	5	1	90	240	758	910	1e-62	242
XLOC_000073	NONHSAT002007.2	95.42	153	5	1	90	240	758	910	2e-62	242
XLOC_000073	NONHSAT002007.2	95.42	153	5	1	90	240	758	910	8e-63	242
XLOC_000073	NONHSAT002008.2	93.92	181	11	0	946	1126	66	246	3e-71	272
XLOC_000075	NONHSAT002153.2	95.38	693	24	4	835	1522	617	1306	0	1096
XLOC_000075	NONHSAT002153.2	95.38	693	24	4	182	869	617	1306	0	1096
XLOC_000075	NONHSAT002153.2	95.38	693	24	4	13	700	617	1306	0	1096
XLOC_000077	NONHSAT153557.1	95.43	569	25	1	8	575	1370	1938	0	914
XLOC_000078	NONHSAT002201.2	87.38	206	17	1	230	426	8690	8895	3e-53	210
XLOC_000078	NONHSAT002201.2	87.38	206	17	1	157	353	8690	8895	2e-53	210
XLOC_000082	NONHSAT002382.2	96.32	1223	40	2	790	2008	373	1594	0	1957
XLOC_000083	NONHSAT002390.2	94.56	1103	49	6	747	1842	1	1099	0	1673
XLOC_000083	NONHSAT002390.2	94.8	789	36	2	747	1531	1	788	0	1229
XLOC_000084	NONHSAT148714.1	96.12	232	4	1	1	227	62	293	4e-107	389
XLOC_000086	NONHSAT002497.2	93.73	319	17	1	1	316	172	490	2e-131	470
XLOC_000086	NONHSAT002497.2	93.71	318	17	1	1	315	173	490	1e-130	468
XLOC_000086	NONHSAT002498.2	94.95	198	7	1	311	505	189	386	8e-83	309
XLOC_000086	NONHSAT002498.2	94.51	237	10	1	1	234	150	386	1e-98	363
XLOC_000086	NONHSAT002498.2	94.49	236	10	1	1	233	151	386	2e-98	361
XLOC_000086	NONHSAT002498.2	95.02	201	7	1	21	218	186	386	2e-84	315
XLOC_000086	NONHSAT002498.2	95.34	193	6	1	46	235	194	386	9e-83	307
XLOC_000087	NONHSAT148756.1	93.29	566	35	2	57	620	1	565	0	807
XLOC_000087	NONHSAT148756.1	93.29	566	35	2	70	633	1	565	0	807
XLOC_000087	NONHSAT148756.1	93.29	566	35	2	224	787	1	565	0	807
XLOC_000087	NONHSAT148756.1	93.29	566	35	2	258	821	1	565	0	807
XLOC_000089	NONHSAT002525.2	95	240	11	1	85	324	3	241	6e-102	373
XLOC_000089	NONHSAT002525.2	95	240	11	1	85	324	3	241	4e-102	373
XLOC_000089	NONHSAT158376.1	88.58	254	28	1	1	254	2099	1847	1e-69	266
XLOC_000091	NONHSAT002600.2	91.79	536	36	4	28	558	612	1144	0	690
XLOC_000094	NONHSAT002655.2	97.81	137	2	1	2454	2590	547	412	2e-61	240
XLOC_000094	NONHSAT148798.1	95.08	244	4	2	168	406	1	241	5e-105	385
XLOC_000094	NONHSAT002655.2	97.81	137	2	1	2127	2263	547	412	2e-61	240
XLOC_000095	NONHSAT174971.1	84.71	85	13	0	25	109	2355	2271	8e-10	65.9
XLOC_000101	NONHSAT027612.2	100	42	0	0	558	599	497	456	6e-15	83.8
XLOC_000103	NONHSAT148828.1	97.05	474	11	1	4	474	56	529	0	825
XLOC_000104	NONHSAT210966.1	96.36	55	2	0	3	57	99	45	1e-17	93.7
XLOC_000104	NONHSAT148828.1	93.71	334	21	0	847	1180	692	1025	1e-138	496
XLOC_000104	NONHSAT148828.1	93.45	351	21	1	77	425	675	1025	1e-142	507
XLOC_000107	NONHSAT072850.2	85.59	229	30	2	59	286	140	366	9e-44	178
XLOC_000107	NONHSAT072850.2	95.65	46	2	0	39	84	140	185	7e-13	75.8
XLOC_000108	NONHSAT002785.2	99.23	130	1	0	124	253	355	226	8e-65	250
XLOC_000109	NONHSAT193909.1	94.87	39	2	0	1	39	5033	5071	2e-08	61.9
XLOC_000112	NONHSAT095106.2	91.53	118	8	1	31	146	2796	2679	3e-34	149
XLOC_000114	NONHSAT191509.1	94.34	53	2	1	476	527	446	498	6e-12	73.8
XLOC_000114	NONHSAT170013.1	100	25	0	0	217	241	1576	1600	7e-05	50.1
XLOC_000115	NONHSAT148892.1	93.68	253	16	0	245	497	257	509	1e-102	375
XLOC_000115	NONHSAT148892.1	90	350	19	1	1	334	160	509	5e-122	438
XLOC_000115	NONHSAT148892.1	93.65	252	16	0	227	478	258	509	4e-102	373
XLOC_000115	NONHSAT148894.1	94.64	280	13	1	82	359	1	280	3e-119	430
XLOC_000116	NONHSAT166678.1	92.86	42	3	0	1	42	296	255	3e-08	60
XLOC_000117	NONHSAT003167.2	93.87	163	10	0	483	645	112	274	6e-63	244
XLOC_000117	NONHSAT003167.2	93.87	163	10	0	483	645	112	274	5e-63	244
XLOC_000117	NONHSAT003167.2	94.84	213	11	0	1	213	62	274	1e-90	335
XLOC_000117	NONHSAT003166.2	93.45	168	11	0	281	448	248	415	1e-63	246
XLOC_000118	NONHSAT003176.2	95.55	494	22	0	220	713	1	494	0	805
XLOC_000118	NONHSAT003179.2	94.57	276	15	0	138	413	818	1093	6e-119	428
XLOC_000119	NONHSAT179440.1	100	24	0	0	130	153	2054	2077	0.0002	48.1
XLOC_000120	NONHSAT054870.2	89.11	101	11	0	432	532	2070	2170	9e-24	113
XLOC_000121	NONHSAT219994.1	89.47	95	9	1	234	328	2335	2242	2e-20	101
XLOC_000122	NONHSAT148951.1	95.52	290	7	1	3	292	47	330	3e-132	474
XLOC_000122	NONHSAT056851.2	88.33	60	7	0	293	352	275	216	9e-09	63.9
XLOC_000126	NONHSAT003313.2	96.2	79	3	0	903	981	130	208	1e-29	133
XLOC_000126	NONHSAT214249.1	93.45	168	11	0	777	944	1079	912	1e-63	246
XLOC_000127	NONHSAT148969.1	93.01	143	10	0	4	146	132	274	9e-52	204
XLOC_000128	NONHSAT213787.1	100	25	0	0	155	179	1385	1361	0.0002	50.1
XLOC_000129	NONHSAT188785.1	88.33	257	27	2	66	321	1951	2205	3e-67	258
XLOC_000132	NONHSAT149020.1	94.53	128	4	1	13	140	1950	2074	1e-48	194
XLOC_000138	NONHSAT149076.1	95.32	171	8	0	64	234	1	171	5e-73	276
XLOC_000139	NONHSAT149101.1	93.09	188	10	2	300	487	1	185	8e-67	256
XLOC_000142	NONHSAT003785.2	93.15	73	5	0	1	73	530	602	5e-22	105
XLOC_000145	NONHSAT153773.1	95.93	246	10	0	206	451	93	338	7e-113	408
XLOC_000145	NONHSAT149182.1	92.31	117	9	0	19	135	1	117	3e-38	161
XLOC_000145	NONHSAT149182.1	92.31	117	9	0	19	135	1	117	3e-38	161
XLOC_000145	NONHSAT149182.1	92.31	117	9	0	19	135	1	117	4e-38	161
XLOC_000145	NONHSAT153787.1	92.09	531	31	3	1	521	1297	1826	5e-179	628
XLOC_000145	NONHSAT149185.1	94.12	34	2	0	70	103	467	500	1e-05	52
XLOC_000146	NONHSAT149208.1	94.09	186	6	1	10	195	1	181	1e-74	281
XLOC_000146	NONHSAT149208.1	94.05	185	6	1	8	192	1	180	4e-74	280
XLOC_000148	NONHSAT149227.1	95.92	49	2	0	74	122	72	120	1e-14	81.8
XLOC_000148	NONHSAT214219.1	85	220	28	3	3986	4204	3548	3333	2e-35	155
XLOC_000148	NONHSAT004022.2	95.11	348	17	0	121	468	264	611	8e-157	555
XLOC_000148	NONHSAT004022.2	93.08	347	23	1	219	565	622	967	3e-137	490
XLOC_000148	NONHSAT004022.2	93.85	130	8	0	27	156	264	393	3e-47	194
XLOC_000149	NONHSAT004062.2	93.77	321	18	1	1	321	207	525	4e-132	472
XLOC_000151	NONHSAT149235.1	90.3	268	26	0	1	268	199	466	6e-88	325
XLOC_000152	NONHSAT149258.1	94.51	237	13	0	1	237	278	514	1e-100	367
XLOC_000152	NONHSAT149258.1	94.67	150	8	0	2	151	364	513	4e-60	234
XLOC_000152	NONHSAT149261.1	94.25	87	5	0	329	415	110	196	5e-30	133
XLOC_000152	NONHSAT149261.1	98.36	61	1	0	253	313	317	377	4e-24	113
XLOC_000152	NONHSAT183033.1	96.55	29	1	0	274	302	7426	7398	6e-05	50.1
XLOC_000153	NONHSAT004168.2	97.89	473	10	0	1	473	172	644	0	817
XLOC_000153	NONHSAT149268.1	98.65	296	4	0	63	358	348	643	3e-144	513
XLOC_000154	NONHSAT004171.2	93.2	721	43	5	1	717	1153	435	0	922
XLOC_000154	NONHSAT004171.2	93.54	557	32	3	2	554	991	435	0	763
XLOC_000155	NONHSAT181487.1	92.11	38	3	0	1621	1658	229	266	7e-05	52
XLOC_000156	NONHSAT004212.2	98.84	172	2	0	135	306	112	283	1e-87	325
XLOC_000158	NONHSAT216019.1	92.31	78	6	0	350	427	3946	4023	3e-22	107
XLOC_000158	NONHSAT216019.1	92.31	78	6	0	277	354	3946	4023	3e-22	107
XLOC_000158	NONHSAT216019.1	92.31	78	6	0	383	460	3946	4023	3e-22	107
XLOC_000159	NONHSAT177225.1	96.3	27	1	0	186	212	350	324	0.0005	46.1
XLOC_000163	NONHSAT149299.1	98.15	162	3	0	1	162	16	177	8e-80	297
XLOC_000164	NONHSAT194116.1	96.67	30	1	0	516	545	787	758	2e-05	52
XLOC_000164	NONHSAT194116.1	96.67	30	1	0	673	702	787	758	3e-05	52
XLOC_000164	NONHSAT153889.1	96.77	93	3	0	470	562	163	255	4e-38	161
XLOC_000165	NONHSAT004319.2	95.1	102	4	1	1	101	231	332	8e-37	155
XLOC_000166	NONHSAT044001.2	93.49	169	11	0	1	169	459	627	4e-64	248
XLOC_000166	NONHSAT149317.1	96.38	138	2	1	176	313	1414	1548	9e-59	230
XLOC_000166	NONHSAT149317.1	96.38	138	2	1	174	311	1414	1548	3e-59	230
XLOC_000166	NONHSAT149317.1	96.38	138	2	1	174	311	1414	1548	3e-59	230
XLOC_000166	NONHSAT149318.1	96.35	137	2	1	174	310	115	248	3e-58	228
XLOC_000166	NONHSAT149319.1	93.71	175	11	0	577	751	205	379	6e-68	260
XLOC_000166	NONHSAT149319.1	93.71	175	11	0	296	470	205	379	4e-68	260
XLOC_000166	NONHSAT011873.2	90.25	236	23	0	1	236	1278	1513	4e-55	216
XLOC_000166	NONHSAT149319.1	93.71	175	11	0	762	936	205	379	8e-68	260
XLOC_000166	NONHSAT149320.1	94.44	36	2	0	1	36	182	217	2e-06	56
XLOC_000167	NONHSAT149318.1	93.91	115	7	0	50	164	540	654	9e-42	172
XLOC_000169	NONHSAT151902.1	92.74	413	30	0	3571	3983	1127	715	7e-164	581
XLOC_000169	NONHSAT151902.1	92.74	413	30	0	3603	4015	1127	715	7e-164	581
XLOC_000170	NONHSAT149331.1	94.32	352	20	0	372	723	67	418	4e-152	539
XLOC_000171	NONHSAT149353.1	100	37	0	0	349	385	745	781	4e-12	73.8
XLOC_000174	NONHSAT213682.1	100	23	0	0	142	164	201	179	0.0004	46.1
XLOC_000176	NONHSAT004661.2	95.69	209	9	0	143	351	7	215	2e-93	343
XLOC_000177	NONHSAT149400.1	99.01	202	2	0	78	279	113	314	6e-106	385
XLOC_000177	NONHSAT004676.2	93.52	880	53	2	219	1098	1	876	0	1221
XLOC_000177	NONHSAT149400.1	99.02	205	2	0	25	229	113	317	4e-107	391
XLOC_000177	NONHSAT149400.1	99.02	205	2	0	11	215	113	317	4e-107	391
XLOC_000177	NONHSAT149400.1	99.01	203	2	0	10	212	113	315	5e-106	387
XLOC_000177	NONHSAT149401.1	96.97	33	1	0	1	33	56	88	7e-07	58
XLOC_000179	NONHSAT149400.1	96.52	230	8	0	1	230	2063	2292	5e-108	392
XLOC_000180	NONHSAT004706.2	98.09	262	5	0	1	262	82	343	1e-134	480
XLOC_000180	NONHSAT004704.2	97.78	45	1	0	1	45	350	394	1e-14	81.8
XLOC_000181	NONHSAT198405.1	96.67	30	1	0	748	777	5925	5954	3e-05	52
XLOC_000182	NONHSAT004819.2	96.43	168	6	0	268	435	468	635	6e-76	285
XLOC_000182	NONHSAT149467.1	94.75	419	19	1	238	656	2749	3164	0	652
XLOC_000182	NONHSAT004822.2	94.12	442	23	1	59	500	1	439	0	666
XLOC_000182	NONHSAT004816.2	94.68	677	30	3	1	677	531	1201	0	1039
XLOC_000182	NONHSAT004818.2	94.75	419	19	1	53	471	1606	2021	0	652
XLOC_000182	NONHSAT149467.1	94.75	419	19	1	248	666	2749	3164	0	652
XLOC_000183	NONHSAT004845.2	93.29	164	11	0	155	318	318	481	3e-61	238
XLOC_000183	NONHSAT004845.2	93.29	164	11	0	109	272	318	481	1e-61	238
XLOC_000183	NONHSAT004845.2	93.29	164	11	0	109	272	318	481	3e-61	238
XLOC_000183	NONHSAT004844.2	97.01	67	2	0	266	332	566	632	7e-25	117
XLOC_000185	NONHSAT222411.1	82.37	312	54	1	314	625	600	290	3e-42	174
XLOC_000185	NONHSAT102994.2	84.79	355	53	1	30	383	387	741	3e-60	234
XLOC_000185	NONHSAT102994.2	84.69	320	48	1	29	347	387	706	3e-51	204
XLOC_000185	NONHSAT222411.1	82.37	312	54	1	132	443	600	290	2e-42	174
XLOC_000186	NONHSAT052275.2	82.38	244	43	0	28	271	345	588	4e-33	143
XLOC_000187	NONHSAT220272.1	96.97	33	1	0	343	375	347	315	2e-07	58
XLOC_000188	NONHSAT214030.1	100	27	0	0	17	43	961	987	2e-06	54
XLOC_000189	NONHSAT004978.2	93.35	451	25	3	1	447	251	700	0	636
XLOC_000190	NONHSAT004989.2	92.88	267	13	4	722	982	288	554	4e-95	351
XLOC_000191	NONHSAT155173.1	91.23	57	5	0	571	627	1496	1440	8e-12	73.8
XLOC_000193	NONHSAT154027.1	94.44	288	15	1	438	724	277	564	4e-121	436
XLOC_000193	NONHSAT154027.1	94.44	288	15	1	611	897	277	564	6e-121	436
XLOC_000194	NONHSAT154027.1	93.2	338	22	1	12	348	1110	1447	6e-134	480
XLOC_000194	NONHSAT154027.1	93.2	338	22	1	12	348	1110	1447	8e-134	480
XLOC_000194	NONHSAT210734.1	100	25	0	0	554	578	1493	1517	0.0001	50.1
XLOC_000195	NONHSAT133323.2	100	30	0	0	518	547	1913	1942	8e-08	60
XLOC_000196	NONHSAT149538.1	93.44	610	40	0	5	614	490	1099	0	892
XLOC_000199	NONHSAT005111.2	98.42	505	8	0	1	505	456	960	0	938
XLOC_000200	NONHSAT154036.1	96.89	322	10	0	1	322	1450	1771	2e-158	559
XLOC_000200	NONHSAT149585.1	94.6	685	30	5	411	1093	1154	1833	0	993
XLOC_000200	NONHSAT154036.1	97.46	197	5	0	1	197	1573	1769	6e-96	351
XLOC_000200	NONHSAT149587.1	94.88	215	10	1	177	390	560	774	2e-89	331
XLOC_000200	NONHSAT149585.1	94.99	859	35	6	163	1018	980	1833	0	1283
XLOC_000200	NONHSAT149585.1	94.6	685	30	5	547	1229	1154	1833	0	993
XLOC_000200	NONHSAT149585.1	94.6	685	30	5	240	922	1154	1833	0	993
XLOC_000200	NONHSAT149585.1	94.6	685	30	5	305	987	1154	1833	0	993
XLOC_000200	NONHSAT149585.1	94.6	685	30	5	377	1059	1154	1833	0	993
XLOC_000200	NONHSAT149587.1	94.88	215	10	1	79	292	560	774	1e-89	331
XLOC_000203	NONHSAT005201.2	94.86	292	15	0	1	292	102	393	2e-128	460
XLOC_000204	NONHSAT005220.2	97.92	96	2	0	402	497	1	96	5e-42	174
XLOC_000204	NONHSAT005220.2	97.92	96	2	0	380	475	1	96	2e-42	174
XLOC_000204	NONHSAT005220.2	97.94	97	2	0	354	450	1	97	4e-43	176
XLOC_000204	NONHSAT005220.2	97.92	96	2	0	323	418	1	96	2e-42	174
XLOC_000204	NONHSAT005220.2	98.31	59	1	0	1	59	24	82	2e-22	109
XLOC_000204	NONHSAT149603.1	100	26	0	0	1	26	626	651	3e-05	52
XLOC_000204	NONHSAT005222.2	95	40	2	0	1	40	142	181	8e-09	63.9
XLOC_000205	NONHSAT172698.1	93.33	225	15	0	875	1099	717	493	8e-88	327
XLOC_000205	NONHSAT005307.2	95	280	14	0	1662	1941	280	1	6e-123	444
XLOC_000206	NONHSAT127941.2	91.71	193	15	1	49	240	366	174	2e-64	248
XLOC_000207	NONHSAT059251.2	93.55	248	16	0	26	273	1046	1293	8e-87	323
XLOC_000208	NONHSAT005312.2	90.1	192	18	1	20	210	95	286	6e-57	222
XLOC_000209	NONHSAT149626.1	92.98	171	10	1	149	317	213	383	1e-61	238
XLOC_000209	NONHSAT149626.1	95.04	141	5	2	1	140	23	162	7e-53	208
XLOC_000211	NONHSAT172211.1	97.22	36	1	0	258	293	1074	1039	4e-09	63.9
XLOC_000215	NONHSAT001193.2	92.31	247	8	2	108	354	1434	1199	9e-93	341
XLOC_000216	NONHSAT001189.2	93.31	314	19	2	88	400	74	386	3e-122	440
XLOC_000216	NONHSAT001186.2	98.32	179	3	0	703	881	548	726	3e-89	331
XLOC_000217	NONHSAT148498.1	92.35	196	10	2	319	513	624	815	5e-68	260
XLOC_000219	NONHSAT006059.2	94.01	284	17	0	27	310	1166	1449	5e-119	428
XLOC_000219	NONHSAT006059.2	94.02	368	20	1	1	366	1082	1449	2e-155	549
XLOC_000219	NONHSAT006059.2	93.99	366	20	1	1	364	1084	1449	4e-154	545
XLOC_000220	NONHSAT006136.2	94.05	185	11	0	309	493	33	217	4e-74	280
XLOC_000221	NONHSAT005828.2	88.61	158	11	1	79	236	265	415	4e-42	174
XLOC_000221	NONHSAT005828.2	88.61	158	11	1	78	235	265	415	1e-42	174
XLOC_000221	NONHSAT005828.2	88.61	158	11	1	70	227	265	415	3e-42	174
XLOC_000221	NONHSAT005828.2	88.61	158	11	1	67	224	265	415	2e-42	174
XLOC_000221	NONHSAT006164.2	94.34	53	3	0	1	53	549	601	3e-14	81.8
XLOC_000221	NONHSAT006164.2	94.34	53	3	0	1	53	549	601	1e-14	81.8
XLOC_000221	NONHSAT005828.2	88.61	158	11	1	36	193	265	415	3e-42	174
XLOC_000221	NONHSAT005828.2	90	60	6	0	9	68	356	415	3e-11	71.9
XLOC_000222	NONHSAT154111.1	94.72	360	19	0	39	398	381	22	3e-159	563
XLOC_000223	NONHSAT001411.2	90.91	44	4	0	274	317	248	291	7e-07	56
XLOC_000224	NONHSAT006001.2	91.92	965	60	5	143	1103	1	951	0	1263
XLOC_000224	NONHSAT006001.2	91.75	800	52	4	30	825	1	790	0	1033
XLOC_000224	NONHSAT149730.1	93.44	701	36	7	86	783	3	696	0	975
XLOC_000225	NONHSAT149732.1	93.04	345	24	0	944	1288	79	423	4e-138	494
XLOC_000225	NONHSAT149732.1	93.48	368	24	0	208	575	56	423	3e-152	539
XLOC_000226	NONHSAT149743.1	91.38	58	4	1	1	58	468	524	3e-10	67.9
XLOC_000227	NONHSAT006063.2	88.04	627	54	5	27	650	978	1586	0	640
XLOC_000228	NONHSAT149724.1	89.77	88	6	1	351	435	584	497	2e-19	99.6
XLOC_000229	NONHSAT149770.1	92.72	591	31	4	65	644	1	590	0	815
XLOC_000229	NONHSAT149770.1	93.23	591	31	3	59	641	1	590	0	842
XLOC_000230	NONHSAT001219.2	88.36	438	47	2	187	624	508	75	7e-126	452
XLOC_000231	NONHSAT006168.2	90.91	418	31	4	6	421	71	483	6e-141	502
XLOC_000233	NONHSAT149770.1	95.1	286	13	1	29	314	1	285	5e-125	448
XLOC_000234	NONHSAT149778.1	95.41	109	5	0	75	183	252	360	4e-43	176
XLOC_000235	NONHSAT149782.1	99.02	102	1	0	471	572	296	397	2e-47	194
XLOC_000236	NONHSAT006391.2	94.28	402	15	3	542	940	221	617	2e-170	601
XLOC_000236	NONHSAT006391.2	95.47	552	16	4	1	549	72	617	0	874
XLOC_000237	NONHSAT006443.2	93.67	663	37	4	137	797	382	1041	0	952
XLOC_000237	NONHSAT006442.2	91.75	739	38	6	45	767	1297	2028	0	922
XLOC_000237	NONHSAT006437.2	93.92	148	9	0	1	148	331	478	5e-57	222
XLOC_000237	NONHSAT006442.2	91.75	739	38	6	465	1187	1297	2028	0	922
XLOC_000237	NONHSAT006438.2	91.67	84	5	1	69	152	269	350	1e-21	105
XLOC_000237	NONHSAT006443.2	93.67	663	37	4	218	878	382	1041	0	952
XLOC_000237	NONHSAT006438.2	92.04	377	22	3	36	409	269	640	6e-139	496
XLOC_000237	NONHSAT006442.2	91.78	742	38	6	114	839	1294	2028	0	928
XLOC_000238	NONHSAT006479.2	94.4	393	22	0	33	425	578	970	5e-172	605
XLOC_000239	NONHSAT154161.1	89.29	336	25	6	66	398	2415	2742	4e-93	343
XLOC_000240	NONHSAT201457.1	100	24	0	0	842	865	1101	1078	0.0005	48.1
XLOC_000241	NONHSAT006905.2	92.67	300	21	1	39	337	1232	933	5e-114	412
XLOC_000241	NONHSAT006905.2	92.72	302	21	1	135	435	1234	933	4e-115	416
XLOC_000241	NONHSAT006905.2	92.69	301	21	1	178	477	1233	933	1e-114	414
XLOC_000245	NONHSAT162631.1	92	75	6	0	262	336	190	264	2e-20	101
XLOC_000246	NONHSAT090180.2	87.34	79	9	1	185	263	380	457	6e-11	69.9
XLOC_000247	NONHSAT007038.2	96.97	132	3	1	1	131	217	348	2e-56	222
XLOC_000250	NONHSAT007118.2	91.62	740	29	8	548	1267	755	1481	0	961
XLOC_000251	NONHSAT007159.2	92.53	950	49	7	95	1027	200	1144	0	1294
XLOC_000253	NONHSAT009896.2	89.39	396	37	2	354	749	2835	3225	8e-123	442
XLOC_000254	NONHSAT153042.1	98.47	131	2	0	690	820	33	163	4e-63	244
XLOC_000254	NONHSAT153042.1	98.05	154	3	0	667	820	10	163	2e-74	281
XLOC_000254	NONHSAT153042.1	98.44	128	2	0	699	826	36	163	2e-61	238
XLOC_000254	NONHSAT177219.1	100	58	0	0	763	820	3803	3860	2e-24	115
XLOC_000256	NONHSAT153037.1	92.81	139	10	0	87	225	721	859	2e-49	196
XLOC_000259	NONHSAT201420.1	88.18	110	13	0	356	465	1046	937	2e-24	115
XLOC_000259	NONHSAT201420.1	88.18	110	13	0	268	377	1046	937	1e-24	115
XLOC_000259	NONHSAT201420.1	88.18	110	13	0	152	261	1046	937	1e-24	115
XLOC_000260	NONHSAT153001.1	98.85	174	2	0	367	540	172	345	1e-88	329
XLOC_000260	NONHSAT012746.2	84.09	88	14	0	360	447	89	176	1e-08	63.9
XLOC_000260	NONHSAT153001.1	98.85	174	2	0	69	242	172	345	1e-88	329
XLOC_000260	NONHSAT153001.1	98.85	174	2	0	261	434	172	345	1e-88	329
XLOC_000260	NONHSAT153001.1	98.86	175	2	0	285	459	172	346	2e-89	331
XLOC_000260	NONHSAT153001.1	98.86	176	2	0	288	463	171	346	5e-90	333
XLOC_000260	NONHSAT153001.1	98.85	174	2	0	285	458	172	345	1e-88	329
XLOC_000260	NONHSAT153001.1	98.86	175	2	0	251	425	171	345	3e-89	331
XLOC_000260	NONHSAT153001.1	98.85	174	2	0	44	217	172	345	1e-88	329
XLOC_000260	NONHSAT153001.1	96.25	267	10	0	217	483	80	346	3e-125	450
XLOC_000261	NONHSAT153002.1	100	34	0	0	297	330	296	329	2e-10	67.9
XLOC_000261	NONHSAT153002.1	100	34	0	0	743	776	296	329	5e-10	67.9
XLOC_000262	NONHSAT009623.2	98.98	98	1	0	1	98	196	293	1e-45	186
XLOC_000262	NONHSAT009623.2	98.91	92	1	0	1	92	202	293	4e-42	174
XLOC_000264	NONHSAT009576.2	93.24	148	10	0	1	148	17	164	3e-54	214
XLOC_000264	NONHSAT009576.2	94.69	113	6	0	5	117	54	166	6e-43	176
XLOC_000265	NONHSAT152960.1	97.56	82	2	0	149	230	1115	1196	8e-34	147
XLOC_000265	NONHSAT152961.1	92.44	291	17	2	3	293	202	487	9e-108	392
XLOC_000265	NONHSAT152961.1	92.41	290	17	2	1	290	203	487	5e-107	391
XLOC_000265	NONHSAT152961.1	92.28	285	17	2	1	285	208	487	5e-104	381
XLOC_000265	NONHSAT152961.1	92.11	266	16	2	1	266	227	487	9e-96	351
XLOC_000265	NONHSAT152961.1	91.91	235	14	2	1	235	258	487	1e-81	305
XLOC_000265	NONHSAT152961.1	91.91	235	14	2	1	235	258	487	2e-81	305
XLOC_000265	NONHSAT152960.1	97.56	82	2	0	237	318	1115	1196	8e-34	147
XLOC_000265	NONHSAT152960.1	97.56	82	2	0	325	406	1115	1196	1e-33	147
XLOC_000265	NONHSAT152960.1	97.56	82	2	0	321	402	1115	1196	6e-34	147
XLOC_000265	NONHSAT152960.1	97.56	82	2	0	300	381	1115	1196	1e-33	147
XLOC_000265	NONHSAT152960.1	97.56	82	2	0	261	342	1115	1196	1e-33	147
XLOC_000265	NONHSAT152960.1	97.56	82	2	0	164	245	1115	1196	5e-34	147
XLOC_000265	NONHSAT152960.1	97.56	82	2	0	173	254	1115	1196	2e-34	147
XLOC_000265	NONHSAT214463.1	90.41	271	24	2	86	355	644	913	2e-84	315
XLOC_000266	NONHSAT152958.1	92.72	261	17	1	57	317	36	294	9e-99	361
XLOC_000268	NONHSAT152946.1	93.44	457	28	1	160	616	105	559	0	662
XLOC_000269	NONHSAT166198.1	87.4	254	31	1	2365	2617	384	131	5e-62	242
XLOC_000269	NONHSAT049670.2	100	26	0	0	124	149	27	2	1e-05	52
XLOC_000269	NONHSAT166198.1	87.4	254	31	1	2303	2555	384	131	5e-62	242
XLOC_000269	NONHSAT166198.1	87.4	254	31	1	2300	2552	384	131	5e-62	242
XLOC_000269	NONHSAT166198.1	87.4	254	31	1	2462	2714	384	131	6e-62	242
XLOC_000274	NONHSAT222723.1	89.37	301	31	1	210	509	12820	12520	9e-91	335
XLOC_000274	NONHSAT222723.1	89.37	301	31	1	129	428	12820	12520	7e-91	335
XLOC_000275	NONHSAT009449.2	96.51	516	12	3	242	757	2959	3468	0	821
XLOC_000275	NONHSAT009449.2	96.51	516	12	3	500	1015	2959	3468	0	821
XLOC_000275	NONHSAT009449.2	93.39	378	20	2	1	377	1230	1603	2e-140	500
XLOC_000276	NONHSAT152891.1	93.93	346	20	1	306	650	604	949	8e-144	511
XLOC_000276	NONHSAT152920.1	93.2	309	21	0	1	309	148	456	5e-124	446
XLOC_000276	NONHSAT152920.1	93.23	310	21	0	1	310	148	457	7e-125	448
XLOC_000276	NONHSAT152891.1	93.93	346	20	1	411	755	604	949	1e-143	511
XLOC_000276	NONHSAT152920.1	92.09	177	14	0	210	386	282	458	7e-62	240
XLOC_000276	NONHSAT152891.1	93.55	279	17	1	957	1234	671	949	1e-110	402
XLOC_000276	NONHSAT108462.2	81.94	504	82	6	5	501	1175	1676	8e-61	236
XLOC_000277	NONHSAT152927.1	94.13	443	18	3	84	520	1465	1905	0	658
XLOC_000278	NONHSAT152891.1	94.03	268	16	0	159	426	2720	2987	9e-112	404
XLOC_000279	NONHSAT150486.1	96.24	186	6	1	432	616	318	133	1e-81	305
XLOC_000282	NONHSAT009409.2	94.19	396	19	2	21	413	17	411	7e-168	591
XLOC_000284	NONHSAT154545.1	94.19	241	9	1	38	278	236	1	2e-100	367
XLOC_000285	NONHSAT222665.1	80.33	183	14	2	1	165	179	1	1e-20	101
XLOC_000286	NONHSAT152857.1	94.27	960	49	3	237	1196	24	977	0	1449
XLOC_000286	NONHSAT152857.1	97.06	102	2	1	137	238	24	124	1e-41	170
XLOC_000287	NONHSAT009251.2	96.53	490	12	1	268	757	316	800	0	799
XLOC_000287	NONHSAT009249.2	96.57	321	6	1	480	800	98	413	1e-143	511
XLOC_000288	NONHSAT152813.1	96.57	175	5	1	1	174	10477	10651	9e-78	291
XLOC_000289	NONHSAT150408.1	93.9	82	5	0	78	159	2798	2717	4e-27	123
XLOC_000289	NONHSAT170496.1	95.26	190	9	0	829	1018	1745	1934	2e-81	305
XLOC_000289	NONHSAT150408.1	93.49	169	11	0	487	655	2885	2717	3e-64	248
XLOC_000289	NONHSAT150408.1	95.98	224	9	0	820	1043	1775	1552	1e-91	339
XLOC_000289	NONHSAT150408.1	95.98	224	9	0	732	955	1775	1552	1e-91	339
XLOC_000289	NONHSAT150408.1	93.49	169	11	0	487	655	2885	2717	3e-64	248
XLOC_000290	NONHSAT154515.1	100	23	0	0	222	244	1078	1056	0.0005	46.1
XLOC_000291	NONHSAT196343.1	86.89	61	8	0	656	716	2460	2400	4e-07	58
XLOC_000291	NONHSAT152810.1	96.43	336	10	2	371	704	557	892	1e-156	555
XLOC_000293	NONHSAT009171.2	95.54	112	5	0	570	681	1	112	1e-44	182
XLOC_000293	NONHSAT009171.2	95.54	112	5	0	570	681	1	112	1e-44	182
XLOC_000295	NONHSAT152805.1	93.89	3093	168	10	1944	5021	2070	5156	0	4575
XLOC_000295	NONHSAT009146.2	97.72	219	5	0	1653	1871	677	895	4e-108	394
XLOC_000295	NONHSAT152805.1	93.89	3093	168	10	3076	6153	2070	5156	0	4575
XLOC_000295	NONHSAT009145.2	97.52	685	13	1	2056	2736	1	685	0	1187
XLOC_000295	NONHSAT009152.2	96.38	304	10	1	1117	1420	3938	3636	3e-142	507
XLOC_000295	NONHSAT152805.1	93.89	3093	168	10	3857	6934	2070	5156	0	4575
XLOC_000296	NONHSAT161863.1	88.78	98	10	1	667	763	608	511	2e-19	99.6
XLOC_000299	NONHSAT008997.2	97.35	264	7	0	1	264	395	658	9e-131	468
XLOC_000300	NONHSAT168636.1	92.86	42	3	0	438	479	460	501	1e-07	60
XLOC_000301	NONHSAT173243.1	91.67	36	3	0	528	563	50	85	0.0004	48.1
XLOC_000303	NONHSAT204884.1	87.11	256	30	3	1893	2146	1965	1711	5e-56	222
XLOC_000303	NONHSAT150358.1	93.33	90	6	0	683	772	129	40	4e-29	131
XLOC_000303	NONHSAT150357.1	93.43	1035	63	1	849	1883	1976	947	0	1513
XLOC_000303	NONHSAT150357.1	93.42	1034	63	1	726	1759	1975	947	0	1511
XLOC_000303	NONHSAT150357.1	93.43	1035	63	1	620	1654	1976	947	0	1513
XLOC_000303	NONHSAT008966.2	92.59	675	41	4	928	1601	1834	1168	0	920
XLOC_000304	NONHSAT141542.2	94.03	67	4	0	1071	1137	506	440	6e-20	101
XLOC_000308	NONHSAT137840.2	87.68	138	7	2	369	496	5841	5704	1e-31	139
XLOC_000312	NONHSAT192236.1	85.4	274	27	2	28	288	44749	44476	9e-60	232
XLOC_000313	NONHSAT008764.2	97.26	73	2	0	1	73	74	2	4e-29	129
XLOC_000314	NONHSAT152730.1	97.3	148	4	0	236	383	1	148	2e-68	262
XLOC_000314	NONHSAT152730.1	97.3	148	4	0	204	351	1	148	2e-68	262
XLOC_000314	NONHSAT152730.1	97.28	147	4	0	297	443	1	147	1e-67	260
XLOC_000314	NONHSAT152730.1	97.28	147	4	0	167	313	1	147	5e-68	260
XLOC_000314	NONHSAT152730.1	97.28	147	4	0	218	364	1	147	6e-68	260
XLOC_000314	NONHSAT152730.1	97.28	147	4	0	164	310	1	147	5e-68	260
XLOC_000314	NONHSAT152730.1	97.3	148	4	0	106	253	1	148	3e-68	262
XLOC_000314	NONHSAT152730.1	97.76	223	5	0	106	328	1	223	4e-111	402
XLOC_000314	NONHSAT152730.1	97.3	148	4	0	80	227	1	148	2e-68	262
XLOC_000315	NONHSAT008664.2	97.99	298	6	0	1	298	91	388	1e-153	543
XLOC_000316	NONHSAT008654.2	96.03	403	15	1	98	499	5956	6358	0	664
XLOC_000317	NONHSAT154423.1	98.84	86	1	0	1	86	996	911	1e-38	163
XLOC_000318	NONHSAT152700.1	96.53	346	12	0	86	431	152	497	8e-168	591
XLOC_000319	NONHSAT152699.1	94.21	501	25	4	27	525	8	506	0	696
XLOC_000320	NONHSAT161358.1	87.06	85	11	0	1	85	190	106	2e-14	81.8
XLOC_000322	NONHSAT191379.1	84.05	351	44	5	67	407	897	549	1e-57	226
XLOC_000322	NONHSAT191379.1	84.05	351	44	5	67	407	897	549	7e-58	226
XLOC_000322	NONHSAT191379.1	84.05	351	44	5	40	380	897	549	1e-57	226
XLOC_000322	NONHSAT191379.1	84.05	351	44	5	39	379	897	549	9e-58	226
XLOC_000322	NONHSAT191379.1	84.05	351	44	5	16	356	897	549	5e-58	226
XLOC_000322	NONHSAT191379.1	84.05	351	44	5	16	356	897	549	1e-57	226
XLOC_000322	NONHSAT191379.1	84.05	351	44	5	10	350	897	549	5e-58	226
XLOC_000322	NONHSAT191379.1	83.85	322	41	4	4	315	869	549	1e-52	208
XLOC_000322	NONHSAT008550.2	93.57	342	18	2	1	339	791	451	5e-138	492
XLOC_000322	NONHSAT152682.1	90	50	5	0	324	373	126	175	7e-08	60
XLOC_000323	NONHSAT162399.1	89.54	832	82	4	1	828	8381	9211	0	888
XLOC_000324	NONHSAT152681.1	94.14	256	9	1	1	250	441	696	8e-108	391
XLOC_000326	NONHSAT008391.2	92.3	1195	72	5	72	1253	1	1188	0	1629
XLOC_000326	NONHSAT008391.2	91.5	929	65	4	373	1288	261	1188	0	1203
XLOC_000326	NONHSAT008391.2	91.49	928	65	4	255	1169	261	1187	0	1201
XLOC_000326	NONHSAT152643.1	96.36	55	2	0	48	102	190	244	6e-18	93.7
XLOC_000326	NONHSAT152643.1	96.15	52	2	0	30	81	190	241	4e-16	87.7
XLOC_000326	NONHSAT054568.2	100	24	0	0	1105	1128	278	301	0.0007	48.1
XLOC_000327	NONHSAT008384.2	94.61	204	11	0	221	424	589	792	2e-85	317
XLOC_000327	NONHSAT008384.2	94.63	205	11	0	70	274	588	792	4e-86	319
XLOC_000330	NONHSAT167973.1	100	24	0	0	454	477	639	616	0.0004	48.1
XLOC_000331	NONHSAT152630.1	94.81	270	11	1	83	349	752	1021	1e-116	420
XLOC_000332	NONHSAT169024.1	90.36	83	6	2	81	161	118	36	2e-15	85.7
XLOC_000332	NONHSAT150137.1	91.87	123	9	1	188	310	176	55	7e-37	157
XLOC_000332	NONHSAT152629.1	97.82	229	1	1	545	769	91	319	8e-114	412
XLOC_000332	NONHSAT055686.2	89.72	107	11	0	23	129	17863	17757	2e-27	125
XLOC_000334	NONHSAT152621.1	94.29	280	16	0	145	424	110	389	7e-119	428
XLOC_000338	NONHSAT192510.1	85.71	70	9	1	310	379	402	334	1e-05	52
XLOC_000339	NONHSAT008281.2	93.98	83	5	0	484	566	2052	1970	2e-27	125
XLOC_000339	NONHSAT008281.2	93.98	83	5	0	1198	1280	2052	1970	4e-27	125
XLOC_000341	NONHSAT152606.1	95.76	401	17	0	1	401	224	624	0	660
XLOC_000342	NONHSAT191518.1	92.28	272	20	1	1938	2209	1892	1622	6e-99	365
XLOC_000342	NONHSAT191518.1	92.28	272	20	1	1938	2209	1892	1622	6e-99	365
XLOC_000342	NONHSAT148667.1	93.68	190	11	1	2112	2301	2463	2651	1e-71	274
XLOC_000342	NONHSAT056165.2	86.33	139	18	1	788	925	5627	5489	7e-25	117
XLOC_000342	NONHSAT191518.1	92.28	272	20	1	2049	2320	1892	1622	6e-99	365
XLOC_000342	NONHSAT148667.1	93.68	190	11	1	2085	2274	2463	2651	1e-71	274
XLOC_000342	NONHSAT056165.2	86.33	139	18	1	1173	1310	5627	5489	1e-24	117
XLOC_000342	NONHSAT191518.1	92.28	272	20	1	2045	2316	1892	1622	6e-99	365
XLOC_000342	NONHSAT148667.1	93.68	190	11	1	1981	2170	2463	2651	1e-71	274
XLOC_000342	NONHSAT168157.1	90.91	44	4	0	339	382	2892	2849	2e-06	56
XLOC_000342	NONHSAT148667.1	93.68	190	11	1	1865	2054	2463	2651	1e-71	274
XLOC_000342	NONHSAT056165.2	86.33	139	18	1	515	652	5627	5489	5e-25	117
XLOC_000342	NONHSAT191518.1	92.28	272	20	1	1759	2030	1892	1622	6e-99	365
XLOC_000342	NONHSAT191518.1	92.28	272	20	1	1756	2027	1892	1622	6e-99	365
XLOC_000342	NONHSAT148667.1	93.68	190	11	1	2067	2256	2463	2651	1e-71	274
XLOC_000343	NONHSAT007812.2	92.39	1564	82	7	1	1529	248	1809	0	2145
XLOC_000343	NONHSAT007813.2	92.77	581	29	2	383	951	864	1443	0	825
XLOC_000343	NONHSAT007813.2	92.78	582	29	2	136	705	863	1443	0	827
XLOC_000344	NONHSAT007356.2	93.01	143	8	1	129	271	82	222	1e-49	198
XLOC_000344	NONHSAT007356.2	93.01	143	8	1	426	568	82	222	2e-49	198
XLOC_000346	NONHSAT007392.2	98.62	1162	15	1	714	1875	3346	4506	0	1961
XLOC_000347	NONHSAT150017.1	100	27	0	0	1	27	832	858	3e-06	54
XLOC_000349	NONHSAT196334.1	81.35	193	33	1	519	708	787	979	8e-18	93.7
XLOC_000349	NONHSAT196334.1	81.35	193	33	1	926	1115	787	979	1e-17	93.7
XLOC_000350	NONHSAT153273.1	84.59	292	40	4	2013	2301	25099	25388	5e-47	192
XLOC_000350	NONHSAT153273.1	84.59	292	40	4	1873	2161	25099	25388	5e-47	192
XLOC_000350	NONHSAT007580.2	93.24	340	20	2	42	378	357	18	7e-134	478
XLOC_000350	NONHSAT222700.1	88.83	358	32	5	160	509	1	358	6e-98	359
XLOC_000350	NONHSAT222700.1	88.83	358	32	5	268	617	1	358	7e-98	359
XLOC_000351	NONHSAT150058.1	94.37	142	8	0	214	355	80	221	1e-55	218
XLOC_000351	NONHSAT150058.1	94.37	142	8	0	195	336	80	221	1e-55	218
XLOC_000351	NONHSAT150058.1	94.37	142	8	0	178	319	80	221	1e-55	218
XLOC_000352	NONHSAT150057.1	95.89	146	6	0	21	166	663	808	6e-63	242
XLOC_000352	NONHSAT150057.1	92.76	221	12	1	118	338	375	591	6e-83	309
XLOC_000353	NONHSAT150061.1	91.46	246	17	1	924	1169	1	242	1e-85	319
XLOC_000359	NONHSAT150083.1	95.65	230	10	0	81	310	396	625	1e-103	377
XLOC_000359	NONHSAT007774.2	95.32	235	11	0	26	260	161	395	3e-104	379
XLOC_000359	NONHSAT007774.2	95.32	235	11	0	71	305	161	395	4e-104	379
XLOC_000359	NONHSAT150083.1	95.65	230	10	0	120	349	396	625	2e-103	377
XLOC_000362	NONHSAT010779.2	86	150	17	2	1	148	518	371	5e-26	119
XLOC_000362	NONHSAT010779.2	86	150	17	2	1	148	518	371	5e-26	119
XLOC_000362	NONHSAT203425.1	89.39	179	13	3	210	382	167	345	4e-46	186
XLOC_000364	NONHSAT101274.2	83.95	299	31	6	90	374	4053	4348	6e-46	186
XLOC_000365	NONHSAT010766.2	96.83	63	2	0	1	63	644	706	1e-22	109
XLOC_000366	NONHSAT010763.2	95.42	306	14	0	21	326	937	632	4e-139	496
XLOC_000367	NONHSAT214372.1	86.88	160	21	0	305	464	892	1051	4e-35	151
XLOC_000367	NONHSAT214372.1	86.88	160	21	0	531	690	892	1051	5e-35	151
XLOC_000367	NONHSAT214372.1	86.88	160	21	0	520	679	892	1051	5e-35	151
XLOC_000367	NONHSAT214372.1	86.88	160	21	0	186	345	892	1051	3e-35	151
XLOC_000367	NONHSAT214372.1	86.88	160	21	0	193	352	892	1051	4e-35	151
XLOC_000367	NONHSAT214372.1	86.88	160	21	0	208	367	892	1051	4e-35	151
XLOC_000368	NONHSAT216763.1	96.05	152	5	1	1	152	340	490	6e-64	246
XLOC_000369	NONHSAT010657.2	95.32	342	12	1	4644	4985	681	1018	3e-154	549
XLOC_000369	NONHSAT010657.2	95.73	1030	25	7	6000	7022	1	1018	0	1661
XLOC_000370	NONHSAT032357.2	90.65	139	11	2	333	470	280	417	5e-37	157
XLOC_000371	NONHSAT010633.2	94.97	338	14	1	171	505	567	230	1e-149	531
XLOC_000371	NONHSAT010633.2	94.97	338	14	1	175	509	567	230	1e-149	531
XLOC_000372	NONHSAT153266.1	96.72	61	2	0	39	99	1	61	3e-21	105
XLOC_000372	NONHSAT150864.1	98.15	594	11	0	426	1019	2671	2078	0	1090
XLOC_000372	NONHSAT150864.1	98.15	594	11	0	844	1437	2671	2078	0	1090
XLOC_000372	NONHSAT150864.1	98.15	594	11	0	622	1215	2671	2078	0	1090
XLOC_000372	NONHSAT153266.1	97.22	36	1	0	379	414	360	395	4e-09	63.9
XLOC_000372	NONHSAT150864.1	98.15	594	11	0	207	800	2671	2078	0	1090
XLOC_000372	NONHSAT150864.1	98.15	594	11	0	359	952	2671	2078	0	1090
XLOC_000372	NONHSAT150864.1	98.15	594	11	0	53	646	2671	2078	0	1090
XLOC_000375	NONHSAT222704.1	95.35	43	2	0	558	600	279	237	2e-10	69.9
XLOC_000376	NONHSAT154822.1	92.47	93	7	0	1	93	93	1	8e-29	129
XLOC_000376	NONHSAT215040.1	86.75	83	10	1	320	401	294	212	7e-11	69.9
XLOC_000376	NONHSAT215040.1	86.75	83	10	1	239	320	294	212	6e-11	69.9
XLOC_000376	NONHSAT215040.1	86.75	83	10	1	334	415	294	212	8e-11	69.9
XLOC_000379	NONHSAT068119.2	87.5	120	15	0	33	152	2392	2273	9e-26	119
XLOC_000381	NONHSAT010407.2	93.82	421	25	1	155	575	68	487	1e-176	620
XLOC_000382	NONHSAT208569.1	94.51	91	5	0	839	929	1063	973	5e-32	141
XLOC_000385	NONHSAT114895.2	84.96	585	82	3	329	913	717	1295	4e-123	444
XLOC_000387	NONHSAT153139.1	89.33	75	8	0	1	75	925	999	2e-15	85.7
XLOC_000388	NONHSAT183047.1	93.55	31	2	0	6	36	1964	1994	0.0006	46.1
XLOC_000389	NONHSAT153110.1	92.91	268	18	1	149	416	1	267	3e-102	373
XLOC_000391	NONHSAT010178.2	88.62	123	14	0	40	162	28	150	7e-30	133
XLOC_000391	NONHSAT131432.2	97.65	85	2	0	296	380	850	766	5e-36	153
XLOC_000391	NONHSAT131432.2	97.65	85	2	0	245	329	850	766	4e-36	153
XLOC_000393	NONHSAT010140.2	94.89	176	3	2	35	207	23	195	3e-71	270
XLOC_000393	NONHSAT010141.2	96.25	160	3	1	47	203	36	195	5e-70	266
XLOC_000395	NONHSAT153098.1	93.54	557	36	0	131	687	336	892	0	819
XLOC_000395	NONHSAT153100.1	93.18	484	30	1	3	486	381	861	0	694
XLOC_000397	NONHSAT191866.1	100	24	0	0	401	424	475	498	0.0003	48.1
XLOC_000397	NONHSAT191866.1	100	24	0	0	594	617	475	498	0.0004	48.1
XLOC_000399	NONHSAT150692.1	89.99	749	51	7	347	1091	770	42	0	868
XLOC_000400	NONHSAT153080.1	89.17	351	31	1	1	344	322	672	5e-110	398
XLOC_000400	NONHSAT010066.2	95.81	477	20	0	27	503	123	599	0	787
XLOC_000400	NONHSAT010066.2	95.81	477	20	0	27	503	123	599	0	787
XLOC_000400	NONHSAT153078.1	98.18	55	1	0	1	55	294	348	5e-20	101
XLOC_000401	NONHSAT094799.2	97.77	224	5	0	127	350	4318	4095	7e-112	404
XLOC_000402	NONHSAT198180.1	95.42	153	7	0	229	381	221	69	5e-64	248
XLOC_000402	NONHSAT094789.2	96.79	156	5	0	1602	1757	363	208	2e-70	270
XLOC_000402	NONHSAT094789.2	96.79	156	5	0	1294	1449	363	208	1e-70	270
XLOC_000402	NONHSAT094789.2	96.79	156	5	0	427	582	363	208	9e-71	270
XLOC_000402	NONHSAT094789.2	95.21	501	24	0	255	755	708	208	0	803
XLOC_000402	NONHSAT094789.2	95.21	501	24	0	255	755	708	208	0	803
XLOC_000403	NONHSAT137877.2	92.77	83	6	0	1	83	528	446	3e-25	117
XLOC_000404	NONHSAT094707.2	87.46	917	79	10	2730	3636	77	967	0	825
XLOC_000406	NONHSAT094680.2	90	230	22	1	465	693	326	555	1e-69	266
XLOC_000407	NONHSAT094678.2	92.99	599	36	4	1252	1846	6	602	0	827
XLOC_000407	NONHSAT094678.2	92.54	684	45	4	1252	1931	6	687	0	924
XLOC_000410	NONHSAT094568.2	87.79	385	25	4	5	372	1891	1512	8e-109	394
XLOC_000410	NONHSAT094568.2	87.79	385	25	4	5	372	1891	1512	1e-108	394
XLOC_000410	NONHSAT094568.2	87.79	385	25	4	5	372	1891	1512	1e-108	394
XLOC_000410	NONHSAT094568.2	87.79	385	25	4	5	372	1891	1512	1e-108	394
XLOC_000410	NONHSAT094572.2	96.01	576	20	1	567	1142	1213	641	0	955
XLOC_000410	NONHSAT076181.2	88.97	145	13	1	1	145	540	681	4e-37	157
XLOC_000410	NONHSAT094572.2	93.73	877	54	1	1564	2440	2342	1467	0	1294
XLOC_000410	NONHSAT094572.2	92.95	965	58	2	1564	2528	2342	1388	0	1374
XLOC_000411	NONHSAT176648.1	88.62	123	8	3	445	565	1287	1169	2e-24	115
XLOC_000412	NONHSAT094578.2	90.27	329	27	3	321	648	401	77	1e-103	379
XLOC_000412	NONHSAT094570.2	93.74	463	23	3	605	1067	3732	3276	4e-159	563
XLOC_000413	NONHSAT194949.1	95.07	284	11	2	2940	3223	1	281	8e-121	438
XLOC_000413	NONHSAT194949.1	95.07	284	11	2	2940	3223	1	281	8e-121	438
XLOC_000413	NONHSAT194949.1	95.07	284	11	2	2940	3223	1	281	9e-121	438
XLOC_000413	NONHSAT194949.1	95.07	284	11	2	2940	3223	1	281	8e-121	438
XLOC_000414	NONHSAT223804.1	93.04	273	19	0	1	273	753	1025	4e-107	391
XLOC_000414	NONHSAT223804.1	93.04	273	19	0	1	273	753	1025	7e-107	391
XLOC_000414	NONHSAT198146.1	90.91	242	18	2	107	345	241	1	7e-78	293
XLOC_000415	NONHSAT198144.1	93.43	335	21	1	682	1016	334	1	1e-134	482
XLOC_000415	NONHSAT198144.1	93.46	627	39	2	1	626	1422	797	0	902
XLOC_000416	NONHSAT150944.1	94.85	369	18	1	539	907	3252	2885	4e-162	573
XLOC_000416	NONHSAT150945.1	92.95	369	25	1	1	368	1434	1066	2e-145	517
XLOC_000418	NONHSAT025266.2	88.89	108	12	0	164	271	13776	13669	2e-25	119
XLOC_000418	NONHSAT025266.2	88.89	108	12	0	164	271	13776	13669	2e-25	119
XLOC_000418	NONHSAT025266.2	88.89	108	12	0	164	271	13776	13669	3e-25	119
XLOC_000418	NONHSAT025266.2	88.89	108	12	0	164	271	13776	13669	2e-25	119
XLOC_000418	NONHSAT025266.2	88.89	108	12	0	164	271	13776	13669	2e-25	119
XLOC_000419	NONHSAT150964.1	89.67	271	13	3	181	436	275	5	2e-70	268
XLOC_000420	NONHSAT150972.1	90.79	608	32	3	175	777	811	223	0	779
XLOC_000420	NONHSAT150972.1	88.94	461	27	3	163	618	664	223	1e-148	527
XLOC_000420	NONHSAT150972.1	88.5	339	17	2	168	503	560	241	3e-106	387
XLOC_000420	NONHSAT150972.1	90.85	590	32	2	175	761	811	241	0	765
XLOC_000420	NONHSAT150972.1	92.75	193	11	1	182	371	433	241	2e-70	268
XLOC_000420	NONHSAT150972.1	93.16	234	16	0	163	396	664	431	3e-91	337
XLOC_000420	NONHSAT150972.1	88.33	908	62	4	1065	1947	1129	241	0	1007
XLOC_000421	NONHSAT224040.1	92.49	1159	82	2	953	2107	2783	1626	0	1598
XLOC_000421	NONHSAT224040.1	92.49	1159	82	2	953	2107	2783	1626	0	1598
XLOC_000421	NONHSAT224040.1	92.49	1159	82	2	953	2107	2783	1626	0	1598
XLOC_000421	NONHSAT224040.1	92.49	1159	82	2	953	2107	2783	1626	0	1598
XLOC_000421	NONHSAT224040.1	92.49	1159	82	2	953	2107	2783	1626	0	1598
XLOC_000423	NONHSAT000343.2	98.47	131	2	0	46	176	829	699	1e-63	244
XLOC_000424	NONHSAT060078.2	89.57	211	22	0	402	612	4735	4945	9e-63	244
XLOC_000430	NONHSAT181075.1	93.28	268	17	1	552	819	288	554	3e-104	381
XLOC_000431	NONHSAT151008.1	91.73	133	11	0	186	318	787	655	3e-43	176
XLOC_000433	NONHSAT000540.2	92.81	640	46	0	40	679	804	165	0	904
XLOC_000433	NONHSAT000543.2	92.45	503	33	3	1	502	1395	897	0	676
XLOC_000433	NONHSAT000543.2	92.45	503	33	3	1	502	1395	897	0	676
XLOC_000433	NONHSAT151015.1	90.37	218	19	1	212	427	485	268	1e-67	260
XLOC_000433	NONHSAT000545.2	92.27	194	14	1	95	287	2220	2027	9e-67	258
XLOC_000434	NONHSAT000546.2	92.26	956	67	4	620	1572	1747	796	0	1283
XLOC_000434	NONHSAT000546.2	91.74	581	43	2	760	1339	1747	1171	0	761
XLOC_000435	NONHSAT151020.1	90.07	151	15	0	6	156	907	757	3e-44	180
XLOC_000435	NONHSAT151020.1	90	150	15	0	6	155	907	758	9e-44	178
XLOC_000437	NONHSAT016230.2	89.47	95	10	0	1310	1404	456	550	3e-22	109
XLOC_000438	NONHSAT154831.1	100	27	0	0	246	272	1807	1833	1e-05	54
XLOC_000438	NONHSAT154831.1	100	27	0	0	246	272	1807	1833	2e-05	54
XLOC_000438	NONHSAT154831.1	100	27	0	0	246	272	1807	1833	1e-05	54
XLOC_000439	NONHSAT159058.1	97.4	77	2	0	1	77	86	10	2e-31	137
XLOC_000440	NONHSAT137539.2	85.29	68	8	1	141	206	4104	4171	7e-05	50.1
XLOC_000443	NONHSAT000626.2	92.06	63	5	0	1	63	570	508	5e-16	85.7
XLOC_000445	NONHSAT191174.1	89.29	84	8	1	10	92	949	1032	3e-16	87.7
XLOC_000446	NONHSAT000821.2	93.73	574	17	6	521	1079	1359	1928	0	831
XLOC_000446	NONHSAT000821.2	93.72	573	17	6	377	934	1360	1928	0	829
XLOC_000446	NONHSAT000821.2	93.72	573	17	6	377	934	1360	1928	0	829
XLOC_000447	NONHSAT148348.1	96.12	206	8	0	140	345	621	826	2e-93	345
XLOC_000448	NONHSAT148382.1	95.81	167	7	0	254	420	291	457	6e-73	276
XLOC_000450	NONHSAT153399.1	96.18	157	6	0	401	557	703	859	3e-69	264
XLOC_000450	NONHSAT153399.1	100	31	0	0	726	756	167	197	3e-08	61.9
XLOC_000450	NONHSAT153399.1	95.95	148	6	0	980	1127	703	850	1e-63	246
XLOC_000451	NONHSAT151134.1	96.52	345	8	1	26	366	345	1	2e-166	587
XLOC_000452	NONHSAT205601.1	97.96	49	1	0	496	544	4119	4167	9e-17	89.7
XLOC_000453	NONHSAT151162.1	91.69	445	23	2	77	507	3035	2591	2e-169	597
XLOC_000453	NONHSAT151162.1	91.74	448	23	2	226	659	3038	2591	4e-171	603
XLOC_000455	NONHSAT001092.2	86.81	182	7	2	68	237	382	206	3e-45	184
XLOC_000456	NONHSAT152250.1	88.33	257	28	2	349	604	2048	2303	1e-66	256
XLOC_000457	NONHSAT005967.2	93.51	339	22	0	5	343	492	154	7e-140	498
XLOC_000458	NONHSAT005828.2	96.08	102	4	0	297	398	266	165	3e-41	170
XLOC_000458	NONHSAT005828.2	96.12	103	4	0	415	517	266	164	7e-42	172
XLOC_000458	NONHSAT005828.2	96.12	103	4	0	207	309	266	164	4e-42	172
XLOC_000458	NONHSAT159070.1	91.37	139	12	0	61	199	159	21	2e-44	180
XLOC_000459	NONHSAT151179.1	90.31	320	19	1	1	308	1474	1155	3e-111	402
XLOC_000459	NONHSAT151179.1	87.61	331	18	2	1	319	1474	1155	3e-97	357
XLOC_000459	NONHSAT151179.1	90.31	320	19	1	1	308	1474	1155	3e-111	402
XLOC_000460	NONHSAT001214.2	93.43	289	14	2	1	284	333	45	3e-114	412
XLOC_000460	NONHSAT001132.2	90.99	333	25	2	1	328	335	3	3e-114	412
XLOC_000461	NONHSAT219051.1	89.95	945	78	9	16	952	1828	893	0	1019
XLOC_000461	NONHSAT219051.1	89.95	945	78	9	16	952	1828	893	0	1019
XLOC_000461	NONHSAT219051.1	89.51	858	77	7	16	868	1828	979	0	898
XLOC_000461	NONHSAT219051.1	89.95	945	78	9	16	952	1828	893	0	1019
XLOC_000461	NONHSAT219051.1	89.95	945	78	9	16	952	1828	893	0	1019
XLOC_000461	NONHSAT219051.1	89.95	945	78	9	16	952	1828	893	0	1019
XLOC_000462	NONHSAT097772.2	91.85	466	36	2	16	480	465	1	2e-172	607
XLOC_000463	NONHSAT001273.2	85.29	367	28	6	33	375	2566	2202	8e-78	291
XLOC_000465	NONHSAT153458.1	93.99	233	14	0	188	420	185	417	1e-95	351
XLOC_000465	NONHSAT153458.1	93.97	232	14	0	380	611	185	416	7e-95	349
XLOC_000465	NONHSAT153458.1	94.49	272	15	0	248	519	186	457	2e-116	420
XLOC_000466	NONHSAT175204.1	88.27	358	38	2	354	707	745	388	1e-99	365
XLOC_000466	NONHSAT183025.1	96.55	29	1	0	84	112	2210	2182	5e-05	50.1
XLOC_000467	NONHSAT001362.2	93.62	956	57	2	575	1530	1404	453	0	1400
XLOC_000467	NONHSAT001362.2	93.53	896	54	2	575	1470	1404	513	0	1304
XLOC_000467	NONHSAT001364.2	95.43	416	18	1	1836	2251	792	378	0	666
XLOC_000467	NONHSAT001365.2	95.44	417	18	1	1836	2252	581	166	0	668
XLOC_000467	NONHSAT001365.2	95.41	414	18	1	1836	2249	581	169	0	662
XLOC_000467	NONHSAT001365.2	95.44	417	18	1	1836	2252	581	166	0	668
XLOC_000467	NONHSAT001365.2	95.43	416	18	1	1836	2251	581	167	0	666
XLOC_000467	NONHSAT001365.2	95.44	417	18	1	1836	2252	581	166	0	668
XLOC_000467	NONHSAT001365.2	95.45	418	18	1	1836	2253	581	165	0	670
XLOC_000467	NONHSAT001365.2	95.45	418	18	1	1836	2253	581	165	0	670
XLOC_000467	NONHSAT001365.2	95.45	418	18	1	1836	2253	581	165	0	670
XLOC_000467	NONHSAT001365.2	95.41	414	18	1	1836	2249	581	169	0	662
XLOC_000467	NONHSAT001365.2	95.42	415	18	1	1836	2250	581	168	0	664
XLOC_000467	NONHSAT001365.2	95.45	418	18	1	1836	2253	581	165	0	670
XLOC_000467	NONHSAT118374.2	96.43	56	2	0	230	285	276	221	1e-18	95.6
XLOC_000467	NONHSAT151231.1	93.22	118	8	0	735	852	118	1	6e-41	170
XLOC_000467	NONHSAT151231.1	93.22	118	8	0	604	721	118	1	6e-41	170
XLOC_000467	NONHSAT104862.2	96.43	28	1	0	57	84	44	71	0.0003	48.1
XLOC_000468	NONHSAT001374.2	93.76	529	21	2	115	631	529	1	0	791
XLOC_000470	NONHSAT009896.2	100	23	0	0	384	406	3163	3141	0.001	46.1
XLOC_000471	NONHSAT196667.1	86.89	122	16	0	934	1055	12	133	4e-24	115
XLOC_000471	NONHSAT196667.1	86.89	122	16	0	934	1055	12	133	7e-24	115
XLOC_000471	NONHSAT196667.1	86.89	122	16	0	934	1055	12	133	1e-23	115
XLOC_000472	NONHSAT151237.1	100	60	0	0	70	129	60	1	1e-25	119
XLOC_000472	NONHSAT151237.1	100	59	0	0	1	59	59	1	2e-25	117
XLOC_000472	NONHSAT151237.1	100	59	0	0	1	59	59	1	2e-25	117
XLOC_000473	NONHSAT151254.1	93.84	292	6	1	2880	3171	634	355	2e-124	450
XLOC_000474	NONHSAT185542.1	96.55	29	1	0	1695	1723	2592	2620	0.0003	50.1
XLOC_000474	NONHSAT151256.1	98.53	68	1	0	1688	1755	4545	4478	1e-27	127
XLOC_000474	NONHSAT151256.1	96.61	354	11	1	1692	2044	4446	4093	2e-169	599
XLOC_000474	NONHSAT151256.1	93.78	225	11	2	1755	1978	4056	3834	6e-86	321
XLOC_000474	NONHSAT151256.1	93.81	226	11	2	1688	1912	4057	3834	1e-86	323
XLOC_000475	NONHSAT151257.1	96.91	583	17	1	156	738	909	328	0	1005
XLOC_000476	NONHSAT151260.1	92.89	1196	65	4	1	1181	1216	26	0	1697
XLOC_000476	NONHSAT151260.1	92.96	1221	66	4	1	1206	1216	1	0	1739
XLOC_000477	NONHSAT153653.1	89.49	257	27	0	87	343	299	555	3e-78	295
XLOC_000477	NONHSAT153653.1	89.49	257	27	0	87	343	299	555	4e-78	295
XLOC_000477	NONHSAT153653.1	89.49	257	27	0	87	343	299	555	6e-78	295
XLOC_000479	NONHSAT001575.2	100	364	0	0	214	577	411	48	4e-171	603
XLOC_000479	NONHSAT001575.2	100	411	0	0	214	624	411	1	0	696
XLOC_000479	NONHSAT001575.2	100	410	0	0	205	614	410	1	0	694
XLOC_000481	NONHSAT151272.1	93.38	438	29	0	6	443	1443	1006	0	638
XLOC_000481	NONHSAT151272.1	93.38	438	29	0	6	443	1443	1006	0	638
XLOC_000482	NONHSAT001624.2	94.29	210	11	1	32	241	273	65	1e-84	313
XLOC_000483	NONHSAT001713.2	94.08	456	25	2	1199	1654	459	6	0	674
XLOC_000483	NONHSAT001713.2	94.08	456	25	2	1199	1654	459	6	0	674
XLOC_000483	NONHSAT001713.2	94.08	456	25	2	1199	1654	459	6	0	674
XLOC_000483	NONHSAT001713.2	94.08	456	25	2	651	1106	459	6	0	674
XLOC_000484	NONHSAT001734.2	94.62	260	13	1	61	319	348	89	3e-86	319
XLOC_000484	NONHSAT001734.2	94.6	278	14	1	405	681	348	71	3e-94	347
XLOC_000485	NONHSAT080114.2	100	24	0	0	611	634	1037	1014	0.0006	48.1
XLOC_000487	NONHSAT151297.1	92.79	1263	68	6	49	1291	1293	34	0	1723
XLOC_000489	NONHSAT180147.1	100	34	0	0	1	34	1083	1050	4e-10	67.9
XLOC_000489	NONHSAT180147.1	100	34	0	0	1	34	1083	1050	6e-10	67.9
XLOC_000489	NONHSAT149938.1	94.74	76	4	0	58	133	290	365	2e-25	119
XLOC_000489	NONHSAT120308.2	89.43	265	28	0	712	976	1339	1075	1e-80	303
XLOC_000490	NONHSAT194388.1	92.59	81	6	0	472	552	2716	2796	6e-24	113
XLOC_000490	NONHSAT136617.2	88.68	265	27	2	1060	1323	626	364	3e-53	212
XLOC_000491	NONHSAT207766.1	82.95	88	15	0	320	407	553	640	1e-06	56
XLOC_000491	NONHSAT180108.1	90.29	278	26	1	339	616	432	156	1e-88	329
XLOC_000494	NONHSAT148627.1	93.08	419	29	0	1	419	562	980	8e-171	601
XLOC_000495	NONHSAT151354.1	95.86	145	6	0	167	311	248	104	4e-62	240
XLOC_000495	NONHSAT151354.1	96.15	156	6	0	1	156	245	90	9e-69	262
XLOC_000496	NONHSAT151356.1	95.06	81	4	0	26	106	81	1	1e-28	129
XLOC_000496	NONHSAT002070.2	95.38	65	3	0	88	152	592	656	1e-21	105
XLOC_000496	NONHSAT002070.2	93.42	76	5	0	81	156	581	656	2e-23	111
XLOC_000498	NONHSAT002185.2	88.34	489	34	3	338	810	1663	1182	3e-150	533
XLOC_000498	NONHSAT002185.2	89.42	539	34	3	1	523	1713	1182	3e-180	632
XLOC_000498	NONHSAT002191.2	93.75	144	8	1	249	392	674	532	4e-52	206
XLOC_000499	NONHSAT002185.2	91.83	257	21	0	279	535	305	49	4e-93	343
XLOC_000500	NONHSAT148665.1	95.78	332	14	0	223	554	9	340	2e-154	547
XLOC_000500	NONHSAT148665.1	95.7	465	18	1	225	687	1	465	0	757
XLOC_000500	NONHSAT148665.1	95.36	474	20	1	223	694	9	482	0	759
XLOC_000501	NONHSAT151397.1	99.03	411	4	0	1401	1811	550	140	0	783
XLOC_000502	NONHSAT002313.2	94.35	124	5	2	1	124	432	311	1e-42	174
XLOC_000506	NONHSAT024034.2	91.28	149	13	0	335	483	64	212	1e-47	192
XLOC_000507	NONHSAT002377.2	94.94	79	1	1	2	80	131	206	3e-26	121
XLOC_000508	NONHSAT173533.1	91.38	116	10	0	172	287	1626	1741	3e-35	151
XLOC_000509	NONHSAT151438.1	94.23	312	16	1	38	347	312	1	2e-131	470
XLOC_000509	NONHSAT151438.1	94.23	312	16	1	748	1057	312	1	5e-131	470
XLOC_000509	NONHSAT151438.1	94.23	312	16	1	744	1053	312	1	6e-131	470
XLOC_000509	NONHSAT151438.1	94.23	312	16	1	290	599	312	1	4e-131	470
XLOC_000510	NONHSAT153584.1	97.22	144	4	0	555	698	570	713	4e-66	254
XLOC_000510	NONHSAT153584.1	97.22	144	4	0	918	1061	570	713	6e-66	254
XLOC_000510	NONHSAT153584.1	97.22	144	4	0	16	159	570	713	9e-67	254
XLOC_000511	NONHSAT153586.1	96.03	151	5	1	7	157	1281	1430	1e-63	244
XLOC_000511	NONHSAT153586.1	96.03	151	5	1	7	157	1281	1430	1e-63	244
XLOC_000511	NONHSAT153586.1	96.08	153	5	1	7	159	1281	1432	1e-64	248
XLOC_000512	NONHSAT148728.1	96.08	255	10	0	318	572	496	750	4e-118	426
XLOC_000512	NONHSAT148728.1	96.08	255	10	0	318	572	496	750	6e-118	426
XLOC_000512	NONHSAT148728.1	96.08	255	10	0	318	572	496	750	6e-118	426
XLOC_000512	NONHSAT148728.1	96.08	255	10	0	318	572	496	750	6e-118	426
XLOC_000512	NONHSAT148728.1	96.52	575	19	1	1	575	177	750	0	973
XLOC_000512	NONHSAT002438.2	88.99	227	12	2	166	379	300	74	1e-67	258
XLOC_000512	NONHSAT002438.2	89.85	197	11	1	174	361	268	72	3e-62	240
XLOC_000513	NONHSAT153595.1	95.35	172	8	0	67	238	949	1120	8e-74	278
XLOC_000514	NONHSAT151462.1	92.86	154	11	0	7	160	456	303	1e-55	218
XLOC_000514	NONHSAT212615.1	89.36	47	5	0	577	623	1052	1098	7e-06	54
XLOC_000515	NONHSAT151474.1	95.06	263	13	0	292	554	264	2	8e-116	418
XLOC_000515	NONHSAT151474.1	95.11	266	13	0	293	558	267	2	1e-117	424
XLOC_000516	NONHSAT002557.2	93.07	866	51	6	1472	2330	1718	855	0	1199
XLOC_000516	NONHSAT002556.2	92.81	1001	62	7	1472	2464	1854	856	0	1364
XLOC_000516	NONHSAT002557.2	93.07	866	51	6	1472	2330	1718	855	0	1199
XLOC_000516	NONHSAT002557.2	93.07	866	51	6	1472	2330	1718	855	0	1199
XLOC_000518	NONHSAT002655.2	95.58	317	12	2	244	559	547	232	2e-140	502
XLOC_000518	NONHSAT002655.2	94.62	316	14	2	244	556	547	232	5e-133	478
XLOC_000518	NONHSAT002655.2	93.61	548	26	4	244	783	547	1	0	787
XLOC_000518	NONHSAT002655.2	94.48	145	7	1	24	167	232	88	3e-55	216
XLOC_000518	NONHSAT002658.2	96.69	151	5	0	309	459	306	156	4e-68	260
XLOC_000518	NONHSAT002658.2	96.43	112	4	0	451	562	306	195	3e-47	190
XLOC_000518	NONHSAT002658.2	96.5	143	5	0	451	593	301	159	3e-63	244
XLOC_000520	NONHSAT002679.2	95.5	400	18	0	587	986	2645	3044	0	650
XLOC_000521	NONHSAT002711.2	95.67	901	35	2	547	1443	1458	558	0	1465
XLOC_000523	NONHSAT069821.2	92.4	263	20	0	4477	4739	1553	1815	4e-98	363
XLOC_000523	NONHSAT211573.1	89.81	265	24	1	987	1248	1708	1444	2e-81	307
XLOC_000523	NONHSAT211573.1	89.81	265	24	1	987	1248	1708	1444	2e-81	307
XLOC_000523	NONHSAT211573.1	89.81	265	24	1	987	1248	1708	1444	2e-81	307
XLOC_000523	NONHSAT211573.1	89.81	265	24	1	987	1248	1708	1444	2e-81	307
XLOC_000523	NONHSAT002723.2	88.94	208	23	0	628	835	677	470	2e-58	230
XLOC_000524	NONHSAT151507.1	94.44	288	15	1	1	288	790	504	2e-121	436
XLOC_000525	NONHSAT144196.2	100	23	0	0	254	276	1108	1086	0.0008	46.1
XLOC_000526	NONHSAT151511.1	88.8	125	10	1	40	164	436	316	7e-31	135
XLOC_000527	NONHSAT002799.2	95.83	48	2	0	801	848	144	97	1e-13	79.8
XLOC_000527	NONHSAT002798.2	94.74	95	5	0	799	893	174	80	2e-34	149
XLOC_000528	NONHSAT002827.2	94.9	529	22	1	247	770	739	211	0	835
XLOC_000529	NONHSAT002829.2	96.06	686	21	3	153	833	823	139	0	1128
XLOC_000529	NONHSAT002829.2	95.15	495	19	2	153	643	823	330	0	781
XLOC_000532	NONHSAT002942.2	94.66	262	14	0	1	262	498	237	2e-112	408
XLOC_000532	NONHSAT002942.2	93.62	345	22	0	1	345	498	154	7e-143	509
XLOC_000532	NONHSAT002942.2	93.62	345	22	0	1	345	498	154	3e-143	509
XLOC_000532	NONHSAT002942.2	94.66	262	14	0	1	262	498	237	1e-112	408
XLOC_000532	NONHSAT002942.2	93.62	345	22	0	1	345	498	154	4e-143	509
XLOC_000532	NONHSAT002942.2	94.66	262	14	0	1	262	498	237	9e-113	408
XLOC_000534	NONHSAT187504.1	96.49	57	2	0	9	65	1167	1111	1e-18	97.6
XLOC_000537	NONHSAT148900.1	96.95	197	6	0	3	199	2442	2638	2e-93	343
XLOC_000537	NONHSAT148900.1	96.94	196	6	0	3	198	2442	2637	2e-92	341
XLOC_000539	NONHSAT168000.1	87.06	170	12	4	218	383	4761	4598	5e-33	143
XLOC_000540	NONHSAT139868.2	86.21	58	8	0	374	431	181	124	2e-05	52
XLOC_000542	NONHSAT151579.1	96.46	226	8	0	257	482	250	25	1e-105	385
XLOC_000542	NONHSAT151579.1	96.02	226	9	0	257	482	250	25	3e-103	377
XLOC_000542	NONHSAT151579.1	96.46	226	8	0	257	482	250	25	1e-105	385
XLOC_000542	NONHSAT151579.1	96.48	227	8	0	257	483	250	24	3e-106	387
XLOC_000542	NONHSAT151579.1	96.36	220	8	0	257	476	250	31	4e-102	373
XLOC_000542	NONHSAT003156.2	94.23	52	3	0	312	363	285	234	6e-14	79.8
XLOC_000542	NONHSAT003159.2	95	100	1	1	288	383	327	228	5e-37	157
XLOC_000542	NONHSAT003159.2	95.07	142	3	1	296	433	369	228	2e-57	224
XLOC_000542	NONHSAT003159.2	95.74	47	2	0	337	383	369	323	2e-13	77.8
XLOC_000542	NONHSAT201767.1	89.47	57	6	0	13	69	2309	2253	8e-10	65.9
XLOC_000544	NONHSAT218707.1	92.21	77	6	0	2	78	408	332	3e-21	105
XLOC_000545	NONHSAT148975.1	93.67	632	35	3	3	634	1	627	0	916
XLOC_000547	NONHSAT151650.1	95.61	228	7	2	60	284	905	678	3e-98	359
XLOC_000547	NONHSAT151650.1	95.98	323	13	0	799	1121	1663	1341	3e-151	537
XLOC_000547	NONHSAT151650.1	94.67	751	40	0	799	1549	1663	913	0	1172
XLOC_000547	NONHSAT151650.1	94.08	1098	54	5	799	1885	1663	566	0	1633
XLOC_000547	NONHSAT153705.1	94.85	990	35	4	1	987	3073	4049	0	1550
XLOC_000547	NONHSAT153705.1	93.1	1160	69	5	1014	2166	5651	6806	0	1637
XLOC_000547	NONHSAT153705.1	94.85	991	35	4	1	988	3073	4050	0	1552
XLOC_000547	NONHSAT153705.1	94.85	991	35	4	1	988	3073	4050	0	1552
XLOC_000547	NONHSAT153705.1	94.85	991	35	4	1	988	3073	4050	0	1552
XLOC_000547	NONHSAT153705.1	95.41	109	5	0	1	109	4740	4848	2e-43	176
XLOC_000547	NONHSAT151654.1	97.92	96	2	0	1181	1276	646	551	5e-42	174
XLOC_000547	NONHSAT151654.1	97.92	96	2	0	317	412	646	551	2e-42	174
XLOC_000547	NONHSAT151654.1	97.92	96	2	0	208	303	646	551	1e-42	174
XLOC_000547	NONHSAT151654.1	95.33	492	17	2	240	725	646	155	0	785
XLOC_000547	NONHSAT151261.1	100	25	0	0	180	204	170	194	7e-05	50.1
XLOC_000547	NONHSAT151654.1	97.92	96	2	0	349	444	646	551	2e-42	174
XLOC_000547	NONHSAT151261.1	100	25	0	0	180	204	170	194	0.0001	50.1
XLOC_000549	NONHSAT151653.1	93.92	181	11	0	1	181	464	284	8e-72	272
XLOC_000551	NONHSAT044237.2	86.25	80	11	0	138	217	773	852	1e-11	71.9
XLOC_000552	NONHSAT003493.2	92.68	41	3	0	361	401	707	747	2e-07	58
XLOC_000553	NONHSAT149003.1	90.75	281	24	1	31	311	1	279	1e-93	345
XLOC_000556	NONHSAT003560.2	94.56	349	13	1	1	349	480	138	1e-153	543
XLOC_000556	NONHSAT003560.2	94.56	349	13	1	1	349	480	138	2e-153	543
XLOC_000558	NONHSAT149050.1	95.12	82	4	0	1843	1924	1884	1965	1e-28	131
XLOC_000560	NONHSAT151702.1	96.06	127	5	0	1	127	844	718	6e-54	212
XLOC_000561	NONHSAT003618.2	95.83	48	2	0	172	219	427	380	6e-14	79.8
XLOC_000562	NONHSAT197508.1	93.59	78	5	0	25	102	120	43	7e-25	115
XLOC_000563	NONHSAT003717.2	98.23	113	2	0	235	347	1112	1000	1e-52	208
XLOC_000563	NONHSAT151736.1	98.21	112	2	0	235	346	1034	923	1e-51	206
XLOC_000564	NONHSAT003723.2	93.54	650	35	4	322	970	674	1317	0	930
XLOC_000565	NONHSAT151738.1	99.18	122	1	0	120	241	135	14	1e-60	234
XLOC_000565	NONHSAT003723.2	91.54	461	30	2	1112	1563	3374	3834	1e-170	603
XLOC_000565	NONHSAT003723.2	91.48	458	30	2	1112	1560	3374	3831	6e-169	597
XLOC_000566	NONHSAT003786.2	96.52	287	10	0	250	536	171	457	4e-137	490
XLOC_000568	NONHSAT168898.1	88.93	253	25	2	15	264	547	295	1e-69	266
XLOC_000569	NONHSAT193638.1	96.55	29	1	0	491	519	134	162	0.0001	50.1
XLOC_000569	NONHSAT193638.1	96.55	29	1	0	491	519	134	162	0.0001	50.1
XLOC_000573	NONHSAT149203.1	96.83	63	2	0	157	219	854	916	7e-22	109
XLOC_000574	NONHSAT041411.2	89.36	141	11	1	98	234	593	453	3e-37	159
XLOC_000574	NONHSAT151793.1	93.57	249	14	1	51	297	249	1	2e-98	361
XLOC_000574	NONHSAT151793.1	93.41	91	6	0	176	266	91	1	6e-30	133
XLOC_000574	NONHSAT151793.1	93.52	247	14	1	558	802	247	1	7e-97	357
XLOC_000574	NONHSAT151793.1	93.41	91	6	0	559	649	91	1	1e-29	133
XLOC_000574	NONHSAT151793.1	93.52	247	14	1	558	802	247	1	6e-97	357
XLOC_000574	NONHSAT151793.1	93.52	247	14	1	558	802	247	1	6e-97	357
XLOC_000574	NONHSAT151793.1	93.52	247	14	1	40	284	247	1	3e-97	357
XLOC_000574	NONHSAT151793.1	97.92	48	1	0	7	54	48	1	4e-16	87.7
XLOC_000574	NONHSAT188113.1	96.97	33	1	0	759	791	119	87	1e-06	58
XLOC_000574	NONHSAT188113.1	96.97	33	1	0	759	791	119	87	1e-06	58
XLOC_000574	NONHSAT188113.1	96.97	33	1	0	759	791	119	87	2e-06	58
XLOC_000574	NONHSAT188113.1	96.97	33	1	0	759	791	119	87	2e-06	58
XLOC_000574	NONHSAT188113.1	96.97	33	1	0	759	791	119	87	2e-06	58
XLOC_000574	NONHSAT188113.1	96.97	33	1	0	759	791	119	87	2e-06	58
XLOC_000574	NONHSAT188113.1	96.97	33	1	0	759	791	119	87	2e-06	58
XLOC_000574	NONHSAT189678.1	100	25	0	0	8	32	7505	7481	3e-05	50.1
XLOC_000575	NONHSAT149233.1	100	31	0	0	764	794	136	166	3e-08	61.9
XLOC_000577	NONHSAT004092.2	91.04	67	6	0	99	165	254	188	5e-16	85.7
XLOC_000578	NONHSAT192638.1	90.41	271	26	0	748	1018	1367	1637	6e-89	331
XLOC_000578	NONHSAT192638.1	90.41	271	26	0	748	1018	1367	1637	5e-89	331
XLOC_000579	NONHSAT151812.1	96.64	119	4	0	1	119	219	101	1e-51	204
XLOC_000580	NONHSAT004151.2	92.31	247	19	0	1	247	456	210	3e-92	339
XLOC_000582	NONHSAT151838.1	94.01	217	13	0	1	217	324	108	8e-89	327
XLOC_000583	NONHSAT072680.2	91.46	82	7	0	23	104	4	85	3e-22	107
XLOC_000586	NONHSAT151862.1	94.52	420	21	1	1	420	7827	7410	0	644
XLOC_000587	NONHSAT073077.2	88.42	190	20	1	578	767	252	65	1e-48	196
XLOC_000587	NONHSAT073077.2	88.42	190	20	1	578	767	252	65	1e-48	196
XLOC_000587	NONHSAT073077.2	88.42	190	20	1	578	767	252	65	1e-48	196
XLOC_000587	NONHSAT073077.2	88.42	190	20	1	578	767	252	65	1e-48	196
XLOC_000587	NONHSAT073077.2	88.42	190	20	1	578	767	252	65	2e-48	196
XLOC_000588	NONHSAT184235.1	89.55	268	26	1	937	1204	1041	776	2e-80	303
XLOC_000588	NONHSAT219843.1	90.85	284	25	1	3137	3419	1874	2157	4e-94	349
XLOC_000589	NONHSAT151869.1	98.19	882	16	0	12	893	1120	239	0	1622
XLOC_000590	NONHSAT151873.1	96.08	153	6	0	72	224	656	504	5e-67	256
XLOC_000590	NONHSAT151873.1	96.08	153	6	0	72	224	656	504	5e-67	256
XLOC_000590	NONHSAT151873.1	96.08	153	6	0	463	615	656	504	9e-67	256
XLOC_000590	NONHSAT151873.1	96.08	153	6	0	463	615	656	504	1e-66	256
XLOC_000590	NONHSAT151873.1	96.08	153	6	0	463	615	656	504	1e-66	256
XLOC_000590	NONHSAT151873.1	96.08	153	6	0	28	180	656	504	4e-67	256
XLOC_000590	NONHSAT151873.1	96.08	153	6	0	535	687	656	504	1e-66	256
XLOC_000592	NONHSAT151896.1	94.79	211	10	1	136	345	258	48	5e-87	323
XLOC_000592	NONHSAT151896.1	94.79	211	10	1	136	345	258	48	2e-87	323
XLOC_000592	NONHSAT004325.2	94.79	211	10	1	136	345	250	40	5e-87	323
XLOC_000592	NONHSAT004325.2	94.4	250	13	1	136	384	250	1	2e-103	377
XLOC_000592	NONHSAT004327.2	94.79	211	10	1	114	323	350	140	4e-87	323
XLOC_000592	NONHSAT151897.1	94.96	258	12	1	1	257	438	181	1e-110	400
XLOC_000592	NONHSAT174766.1	84.62	247	22	3	1	246	756	525	2e-38	163
XLOC_000593	NONHSAT004323.2	98.2	111	2	0	116	226	283	173	9e-52	204
XLOC_000594	NONHSAT004335.2	91.86	172	13	1	1	172	1218	1048	4e-57	222
XLOC_000595	NONHSAT004366.2	93.49	461	26	3	59	519	471	15	0	654
XLOC_000595	NONHSAT151904.1	96.41	195	7	0	128	322	433	239	1e-89	331
XLOC_000595	NONHSAT004366.2	93.49	461	26	3	128	588	471	15	0	654
XLOC_000595	NONHSAT004360.2	90.46	608	34	6	70	671	604	15	0	733
XLOC_000595	NONHSAT004370.2	95.29	679	27	4	46	724	674	1	0	1021
XLOC_000596	NONHSAT136306.2	85.71	63	9	0	391	453	487	425	5e-06	54
XLOC_000596	NONHSAT136306.2	85.71	63	9	0	394	456	487	425	5e-06	54
XLOC_000597	NONHSAT154036.1	90.91	44	4	0	405	448	477	520	1e-06	56
XLOC_000598	NONHSAT004404.2	93.71	668	41	1	592	1259	1128	462	0	983
XLOC_000598	NONHSAT151924.1	97.76	268	5	1	46	312	1259	992	2e-133	476
XLOC_000598	NONHSAT151924.1	96.36	604	20	2	299	901	1594	992	0	1007
XLOC_000598	NONHSAT151924.1	94.76	2615	108	6	1002	3613	3580	992	0	4014
XLOC_000598	NONHSAT151924.1	94.76	2616	108	6	1002	3614	3580	991	0	4016
XLOC_000598	NONHSAT004411.2	94.74	2622	109	6	1002	3620	2925	330	0	4020
XLOC_000598	NONHSAT151924.1	94.76	2615	108	6	1002	3613	3580	992	0	4014
XLOC_000600	NONHSAT004486.2	95.07	284	14	0	1	284	284	1	4e-126	452
XLOC_000601	NONHSAT004529.2	95.19	104	5	0	364	467	138	35	4e-40	167
XLOC_000601	NONHSAT004527.2	93.5	1385	77	4	2225	3608	1503	131	0	1963
XLOC_000602	NONHSAT126528.2	87.5	88	10	1	745	832	660	574	1e-13	79.8
XLOC_000602	NONHSAT126528.2	87.5	88	10	1	860	947	660	574	2e-13	79.8
XLOC_000602	NONHSAT126528.2	87.5	88	10	1	606	693	660	574	1e-13	79.8
XLOC_000602	NONHSAT126528.2	87.5	88	10	1	520	607	660	574	1e-13	79.8
XLOC_000603	NONHSAT151957.1	95.17	145	5	1	604	746	1108	964	1e-57	226
XLOC_000603	NONHSAT151957.1	95.17	145	5	1	812	954	1108	964	1e-57	226
XLOC_000603	NONHSAT151957.1	95.17	145	5	1	604	746	1108	964	1e-57	226
XLOC_000603	NONHSAT004614.2	89.61	356	18	3	1228	1564	434	79	6e-116	420
XLOC_000603	NONHSAT004614.2	89.61	356	18	3	1017	1353	434	79	5e-116	420
XLOC_000603	NONHSAT004614.2	89.61	356	18	3	479	815	434	79	3e-116	420
XLOC_000603	NONHSAT004609.2	94.67	338	18	0	337	674	713	376	2e-148	527
XLOC_000603	NONHSAT004609.2	94.67	338	18	0	337	674	713	376	2e-148	527
XLOC_000603	NONHSAT004609.2	94.67	338	18	0	337	674	713	376	3e-148	527
XLOC_000603	NONHSAT004614.2	89.1	321	16	3	355	656	434	114	3e-100	367
XLOC_000606	NONHSAT151967.1	91.98	424	19	2	32	441	430	8	7e-165	581
XLOC_000608	NONHSAT151987.1	95.65	46	2	0	642	687	261	216	2e-12	75.8
XLOC_000609	NONHSAT004731.2	92.72	151	10	1	3467	3617	2639	2490	2e-50	204
XLOC_000609	NONHSAT004731.2	92.57	148	10	1	3467	3614	2639	2493	1e-48	198
XLOC_000610	NONHSAT004731.2	98.26	575	10	0	1	575	764	190	0	1061
XLOC_000611	NONHSAT004768.2	94.57	129	7	0	337	465	126	254	3e-50	200
XLOC_000612	NONHSAT004783.2	90.57	1007	67	6	4	983	1225	220	0	1239
XLOC_000612	NONHSAT004783.2	90.57	1007	67	6	4	983	1225	220	0	1239
XLOC_000612	NONHSAT004783.2	90.58	1008	67	6	4	984	1225	219	0	1241
XLOC_000612	NONHSAT004783.2	89.54	1224	82	9	4	1184	1225	5	0	1413
XLOC_000613	NONHSAT215569.1	84.95	93	14	0	290	382	5549	5457	7e-12	73.8
XLOC_000614	NONHSAT202974.1	97.96	49	1	0	2	50	3201	3249	5e-17	89.7
XLOC_000616	NONHSAT179832.1	85.92	71	10	0	95	165	1112	1042	2e-08	61.9
XLOC_000616	NONHSAT179832.1	85.92	71	10	0	95	165	1112	1042	3e-08	61.9
XLOC_000616	NONHSAT179832.1	85.92	71	10	0	95	165	1112	1042	3e-08	61.9
XLOC_000616	NONHSAT149482.1	100	31	0	0	596	626	1	31	2e-08	61.9
XLOC_000616	NONHSAT149482.1	100	31	0	0	908	938	1	31	4e-08	61.9
XLOC_000619	NONHSAT098468.2	85.96	57	8	0	118	174	7077	7133	3e-05	50.1
XLOC_000621	NONHSAT005996.2	85.04	421	61	2	22	441	968	549	2e-69	266
XLOC_000621	NONHSAT005996.2	85.04	421	61	2	22	441	968	549	2e-69	266
XLOC_000621	NONHSAT006130.2	87	223	29	0	267	489	230	8	2e-53	212
XLOC_000622	NONHSAT154111.1	90.4	125	10	2	213	336	9	132	3e-31	137
XLOC_000622	NONHSAT154111.1	89.04	374	35	4	231	600	9	380	8e-107	389
XLOC_000623	NONHSAT036485.2	96.77	31	1	0	69	99	2819	2789	4e-06	54
XLOC_000624	NONHSAT208651.1	94.59	37	2	0	676	712	1125	1161	4e-07	58
XLOC_000624	NONHSAT029935.2	93.1	87	6	0	611	697	289	375	2e-27	125
XLOC_000624	NONHSAT004981.2	91.46	246	20	1	807	1051	37	282	7e-84	313
XLOC_000624	NONHSAT029935.2	93.33	90	6	0	297	386	289	378	2e-29	131
XLOC_000626	NONHSAT072980.2	84.38	256	38	1	132	387	784	1037	3e-45	184
XLOC_000627	NONHSAT190270.1	100	23	0	0	13	35	684	706	0.0005	46.1
XLOC_000628	NONHSAT182169.1	97.37	76	2	0	1	76	2339	2414	4e-30	135
XLOC_000628	NONHSAT005103.2	93.8	242	15	0	579	820	946	705	3e-98	361
XLOC_000628	NONHSAT182169.1	97.37	76	2	0	1	76	2339	2414	2e-30	135
XLOC_000628	NONHSAT005103.2	95.56	180	8	0	1	180	884	705	3e-78	293
XLOC_000628	NONHSAT005103.2	95.56	180	8	0	1	180	884	705	4e-78	293
XLOC_000628	NONHSAT005103.2	96.05	152	6	0	1	152	884	733	4e-66	254
XLOC_000629	NONHSAT005107.2	100	85	0	0	731	815	415	331	2e-40	168
XLOC_000630	NONHSAT005137.2	95.28	106	5	0	405	510	291	396	3e-41	170
XLOC_000631	NONHSAT094233.2	100	30	0	0	1	30	1787	1816	1e-07	60
XLOC_000631	NONHSAT094233.2	100	30	0	0	1	30	1787	1816	2e-07	60
XLOC_000632	NONHSAT152081.1	94.28	2658	118	13	3524	6161	2941	298	0	3889
XLOC_000634	NONHSAT152124.1	95.83	312	13	0	380	691	623	312	6e-145	515
XLOC_000635	NONHSAT005345.2	87.82	197	13	2	19	213	188	1	4e-51	202
XLOC_000636	NONHSAT023385.2	90.21	235	16	3	78	312	617	390	3e-70	268
XLOC_000636	NONHSAT023385.2	90.21	235	16	3	328	562	617	390	3e-70	268
XLOC_000636	NONHSAT023385.2	90.21	235	16	3	340	574	617	390	3e-70	268
XLOC_000636	NONHSAT023385.2	90.21	235	16	3	77	311	617	390	4e-70	268
XLOC_000636	NONHSAT023385.2	90.21	235	16	3	741	975	617	390	5e-70	268
XLOC_000638	NONHSAT152143.1	96.57	175	1	2	1	174	2574	2404	3e-77	289
XLOC_000639	NONHSAT005416.2	93.22	59	4	0	1	59	157	215	7e-16	85.7
XLOC_000639	NONHSAT152154.1	100	115	0	0	1	115	440	326	9e-59	228
XLOC_000643	NONHSAT006059.2	94.22	346	17	2	1	345	526	183	1e-144	513
XLOC_000644	NONHSAT154117.1	90.85	317	28	1	208	523	1986	2302	2e-107	391
XLOC_000644	NONHSAT152247.1	95.24	105	5	0	48	152	189	85	8e-41	168
XLOC_000646	NONHSAT201672.1	100	52	0	0	4	55	76	127	7e-21	103
XLOC_000647	NONHSAT152233.1	90.83	229	16	1	1	229	295	72	1e-76	287
XLOC_000648	NONHSAT005862.2	95.6	91	4	0	203	293	310	220	8e-35	149
XLOC_000648	NONHSAT005862.2	95.6	91	4	0	207	297	310	220	8e-35	149
XLOC_000648	NONHSAT005862.2	95.6	91	4	0	121	211	310	220	6e-35	149
XLOC_000649	NONHSAT152250.1	86.71	286	34	3	71	353	2508	2792	6e-51	202
XLOC_000650	NONHSAT152247.1	94.32	546	15	3	298	843	718	189	0	839
XLOC_000650	NONHSAT152247.1	95.62	160	6	1	298	457	718	560	5e-66	254
XLOC_000651	NONHSAT204167.1	96.09	128	5	0	211	338	197	324	1e-54	214
XLOC_000652	NONHSAT152278.1	95.19	208	9	1	373	579	438	231	9e-88	325
XLOC_000652	NONHSAT149702.1	96.17	183	7	0	873	1055	685	867	5e-82	307
XLOC_000652	NONHSAT152278.1	95.95	173	6	1	373	544	438	266	1e-73	280
XLOC_000652	NONHSAT152278.1	95.95	173	6	1	373	544	438	266	1e-73	280
XLOC_000652	NONHSAT006245.2	91.9	210	16	1	540	748	1681	1472	4e-72	274
XLOC_000655	NONHSAT152281.1	97.05	237	7	0	3	239	818	582	1e-114	414
XLOC_000655	NONHSAT152281.1	97.05	237	7	0	3	239	818	582	1e-114	414
XLOC_000656	NONHSAT152283.1	92.97	327	22	1	2178	2503	950	624	2e-104	383
XLOC_000657	NONHSAT219200.1	88.3	94	11	0	388	481	624	531	1e-19	99.6
XLOC_000658	NONHSAT223715.1	88.97	281	23	3	308	587	3014	3287	6e-79	297
XLOC_000661	NONHSAT191046.1	85.93	135	18	1	11	144	301	167	1e-22	109
XLOC_000662	NONHSAT149833.1	95.17	704	34	0	172	875	10226	10929	0	1092
XLOC_000662	NONHSAT149833.1	94.81	77	4	0	159	235	10226	10302	1e-26	121
XLOC_000662	NONHSAT149833.1	94.45	901	44	3	406	1302	10226	11124	0	1298
XLOC_000662	NONHSAT149833.1	94.37	871	42	5	1	867	9289	10156	0	1263
XLOC_000663	NONHSAT006627.2	91.25	160	11	1	41	197	392	233	5e-51	202
XLOC_000664	NONHSAT115729.2	100	29	0	0	160	188	390	362	1e-07	58
XLOC_000665	NONHSAT152397.1	95.36	323	15	0	1	323	533	211	9e-147	521
XLOC_000667	NONHSAT171851.1	93.75	48	3	0	58	105	482	435	2e-11	71.9
XLOC_000669	NONHSAT149905.1	89.59	269	28	0	1046	1314	743	1011	4e-83	311
XLOC_000669	NONHSAT149905.1	89.59	269	28	0	1041	1309	743	1011	4e-83	311
XLOC_000669	NONHSAT149905.1	90.04	281	28	0	999	1279	743	1023	3e-90	335
XLOC_000670	NONHSAT152413.1	95.28	508	24	0	2	509	649	142	0	817
XLOC_000672	NONHSAT010030.2	93.33	240	14	1	1	240	417	180	3e-83	309
XLOC_000673	NONHSAT153069.1	98.81	84	1	0	74	157	7	90	1e-37	159
XLOC_000674	NONHSAT209480.1	92.31	52	4	0	520	571	733	784	2e-11	71.9
XLOC_000675	NONHSAT157509.1	90.74	54	5	0	92	145	828	775	2e-10	67.9
XLOC_000675	NONHSAT016398.2	89.86	69	7	0	92	160	294	226	1e-14	81.8
XLOC_000676	NONHSAT150673.1	95	100	5	0	2938	3037	211	112	7e-37	159
XLOC_000676	NONHSAT150673.1	95	100	5	0	2850	2949	211	112	7e-37	159
XLOC_000676	NONHSAT174766.1	87.08	209	23	1	2191	2395	779	571	1e-48	198
XLOC_000676	NONHSAT150673.1	95.05	101	5	0	1953	2053	212	112	1e-37	161
XLOC_000676	NONHSAT150671.1	91.12	428	37	1	1	428	750	324	3e-152	539
XLOC_000677	NONHSAT150668.1	95.83	96	4	0	550	645	178	83	1e-37	159
XLOC_000678	NONHSAT198148.1	88.89	45	5	0	1	45	2775	2731	6e-05	50.1
XLOC_000679	NONHSAT203384.1	83.9	739	83	9	14	720	8860	9594	7e-141	504
XLOC_000680	NONHSAT211864.1	93.55	124	8	0	431	554	1811	1934	2e-44	182
XLOC_000680	NONHSAT009809.2	93.48	138	9	0	1606	1743	161	24	3e-50	202
XLOC_000680	NONHSAT009809.2	93.43	137	9	0	1606	1742	161	25	1e-49	200
XLOC_000681	NONHSAT009718.2	97.35	226	6	0	436	661	226	1	2e-110	400
XLOC_000681	NONHSAT009718.2	97.35	226	6	0	436	661	226	1	3e-110	400
XLOC_000681	NONHSAT150616.1	96.26	321	12	0	402	722	1069	749	1e-152	541
XLOC_000681	NONHSAT009718.2	97.35	226	6	0	436	661	226	1	3e-110	400
XLOC_000681	NONHSAT009718.2	97.35	226	6	0	436	661	226	1	3e-110	400
XLOC_000681	NONHSAT009718.2	97.35	226	6	0	436	661	226	1	3e-110	400
XLOC_000681	NONHSAT009718.2	97.35	226	6	0	436	661	226	1	3e-110	400
XLOC_000681	NONHSAT009713.2	98.42	253	4	0	562	814	288	36	4e-131	470
XLOC_000681	NONHSAT009710.2	96.28	565	17	1	403	967	577	17	0	952
XLOC_000681	NONHSAT009718.2	97.35	226	6	0	436	661	226	1	3e-110	400
XLOC_000681	NONHSAT150616.1	96.26	321	12	0	402	722	1069	749	2e-152	541
XLOC_000681	NONHSAT150616.1	96.26	321	12	0	402	722	1069	749	1e-152	541
XLOC_000681	NONHSAT009710.2	96.28	565	17	1	403	967	577	17	0	952
XLOC_000681	NONHSAT009718.2	97.35	226	6	0	436	661	226	1	3e-110	400
XLOC_000681	NONHSAT009709.2	95.43	175	8	0	1	175	221	47	1e-75	283
XLOC_000682	NONHSAT150610.1	92.27	233	18	0	202	434	817	585	8e-86	319
XLOC_000689	NONHSAT180591.1	90.38	260	25	0	5	264	2935	2676	3e-85	317
XLOC_000690	NONHSAT164664.1	91.3	805	50	7	1920	2716	793	1	0	981
XLOC_000691	NONHSAT150453.1	93.39	605	33	3	1435	2039	1797	1200	0	866
XLOC_000691	NONHSAT150453.1	93.39	605	33	3	1435	2039	1797	1200	0	866
XLOC_000695	NONHSAT216371.1	96.88	32	1	0	255	286	1439	1470	9e-07	56
XLOC_000696	NONHSAT009160.2	91.3	805	51	7	39	841	788	1	0	1009
XLOC_000696	NONHSAT009160.2	94.57	497	23	3	1	496	1132	639	0	749
XLOC_000696	NONHSAT009160.2	92.34	1149	69	8	1	1147	1132	1	0	1538
XLOC_000696	NONHSAT009160.2	92.1	1152	69	9	1	1150	1132	1	0	1516
XLOC_000697	NONHSAT009048.2	91.72	580	33	3	584	1148	681	102	0	722
XLOC_000697	NONHSAT009048.2	92.09	632	35	3	584	1200	681	50	0	809
XLOC_000698	NONHSAT150369.1	94.59	148	8	0	1	148	148	1	5e-59	230
XLOC_000699	NONHSAT148087.2	89.32	103	11	0	148	250	3852	3954	4e-25	117
XLOC_000699	NONHSAT148087.2	89.32	103	11	0	148	250	3852	3954	5e-25	117
XLOC_000699	NONHSAT154483.1	93.63	157	8	1	565	719	1209	1053	6e-50	200
XLOC_000700	NONHSAT009019.2	90.1	293	15	2	328	608	790	500	7e-98	359
XLOC_000701	NONHSAT008996.2	95.52	134	6	0	51	184	1054	1187	6e-56	218
XLOC_000702	NONHSAT000379.2	91.63	227	19	0	256	482	40	266	1e-79	299
XLOC_000705	NONHSAT158468.1	92.71	96	7	0	72	167	961	866	2e-30	135
XLOC_000706	NONHSAT008930.2	94.24	139	8	0	113	251	501	363	4e-54	212
XLOC_000707	NONHSAT008878.2	93.14	277	15	1	209	481	354	78	3e-109	396
XLOC_000707	NONHSAT008878.2	93.58	265	13	1	232	492	326	62	7e-107	389
XLOC_000707	NONHSAT150333.1	93.42	319	17	1	437	751	539	221	2e-129	464
XLOC_000709	NONHSAT133161.2	96.03	151	6	0	471	621	1371	1221	1e-65	252
XLOC_000709	NONHSAT133161.2	90.95	420	37	1	709	1127	455	36	4e-147	523
XLOC_000709	NONHSAT133161.2	94.44	180	10	0	253	432	1371	1192	3e-73	278
XLOC_000709	NONHSAT221011.1	88.89	414	45	1	1292	1704	1	414	3e-124	448
XLOC_000709	NONHSAT133161.2	90.91	418	37	1	709	1125	455	38	8e-146	519
XLOC_000709	NONHSAT133161.2	90.97	421	37	1	503	922	456	36	2e-147	525
XLOC_000709	NONHSAT221011.1	88.89	414	45	1	1250	1662	1	414	6e-124	448
XLOC_000709	NONHSAT133161.2	89.78	822	58	3	401	1198	1146	327	0	985
XLOC_000709	NONHSAT133161.2	90.91	418	37	1	709	1125	455	38	2e-145	519
XLOC_000709	NONHSAT221011.1	88.89	414	45	1	1280	1692	1	414	6e-124	448
XLOC_000709	NONHSAT221011.1	88.89	414	45	1	970	1382	1	414	5e-124	448
XLOC_000709	NONHSAT133161.2	92	275	19	1	409	680	868	594	1e-99	367
XLOC_000709	NONHSAT133161.2	90.91	418	37	1	709	1125	455	38	2e-145	519
XLOC_000709	NONHSAT221011.1	88.89	414	45	1	1047	1459	1	414	5e-124	448
XLOC_000710	NONHSAT191518.1	96.49	57	2	0	720	776	1904	1848	5e-19	97.6
XLOC_000711	NONHSAT214742.1	91.51	106	9	0	201	306	1783	1678	1e-31	139
XLOC_000711	NONHSAT214742.1	91.51	106	9	0	201	306	1783	1678	2e-31	139
XLOC_000712	NONHSAT139919.2	93.67	79	5	0	445	523	167	245	5e-25	117
XLOC_000716	NONHSAT008728.2	92.92	226	16	0	608	833	506	281	2e-86	321
XLOC_000716	NONHSAT008728.2	92.92	226	16	0	679	904	506	281	2e-86	321
XLOC_000716	NONHSAT008728.2	88.95	353	27	5	494	837	2043	1694	2e-99	365
XLOC_000716	NONHSAT008728.2	93.53	649	38	2	549	1195	2584	1938	0	942
XLOC_000716	NONHSAT008728.2	93.53	649	38	2	549	1195	2584	1938	0	942
XLOC_000717	NONHSAT150295.1	93.63	612	36	1	203	811	846	235	0	900
XLOC_000717	NONHSAT150295.1	93.63	612	36	1	203	811	846	235	0	900
XLOC_000719	NONHSAT150290.1	98.02	101	2	0	1	101	424	324	2e-45	184
XLOC_000720	NONHSAT008671.2	95.8	119	5	0	437	555	450	332	7e-49	196
XLOC_000721	NONHSAT015312.2	92.11	38	3	0	298	335	230	193	1e-05	52
XLOC_000722	NONHSAT211882.1	79.3	1517	262	20	3852	5338	6641	5147	3e-108	396
XLOC_000724	NONHSAT150263.1	89.24	474	30	1	3	455	492	19	5e-160	567
XLOC_000724	NONHSAT150259.1	93.97	779	47	0	1978	2756	779	1	0	1172
XLOC_000724	NONHSAT150259.1	93.97	779	47	0	1897	2675	779	1	0	1172
XLOC_000724	NONHSAT150259.1	93.97	779	47	0	1903	2681	779	1	0	1172
XLOC_000724	NONHSAT150259.1	93.97	779	47	0	2257	3035	779	1	0	1172
XLOC_000724	NONHSAT150263.1	88.89	486	33	1	7	471	504	19	3e-160	567
XLOC_000724	NONHSAT150259.1	93.97	779	47	0	1904	2682	779	1	0	1172
XLOC_000724	NONHSAT150259.1	93.41	1017	59	2	24	1040	1009	1	0	1481
XLOC_000725	NONHSAT169377.1	93.79	161	9	1	92	251	5910	5750	7e-60	232
XLOC_000726	NONHSAT022904.2	82.35	102	18	0	433	534	1241	1140	1e-07	60
XLOC_000727	NONHSAT194949.1	94.29	175	10	0	72	246	202	28	1e-70	268
XLOC_000729	NONHSAT008572.2	96.12	438	16	1	172	609	549	113	0	726
XLOC_000729	NONHSAT150252.1	94.25	87	4	1	411	497	197	112	2e-27	125
XLOC_000730	NONHSAT150244.1	95.76	118	5	0	2	119	374	257	2e-48	194
XLOC_000730	NONHSAT150244.1	94.39	196	11	0	2	197	374	179	6e-81	301
XLOC_000731	NONHSAT008567.2	92.52	214	12	1	1	214	682	473	3e-79	295
XLOC_000735	NONHSAT008505.2	91.93	1066	55	3	1	1041	1164	105	0	1415
XLOC_000735	NONHSAT008505.2	92.36	1125	55	3	1	1100	1164	46	0	1532
XLOC_000735	NONHSAT008499.2	92.4	1158	57	3	1	1133	1326	175	0	1582
XLOC_000735	NONHSAT008505.2	92.62	1166	55	3	1	1141	1164	5	0	1614
XLOC_000735	NONHSAT008504.2	92.67	1174	55	3	1	1149	1168	1	0	1629
XLOC_000735	NONHSAT008500.2	92.93	1344	64	3	11	1329	1341	4	0	1895
XLOC_000736	NONHSAT150184.1	94.56	147	8	0	179	325	335	189	9e-59	228
XLOC_000737	NONHSAT150179.1	95.74	188	8	0	223	410	664	477	4e-83	309
XLOC_000738	NONHSAT150179.1	98.81	84	1	0	77	160	257	174	4e-38	159
XLOC_000742	NONHSAT008295.2	95.08	1098	48	5	263	1357	1358	264	0	1663
XLOC_000746	NONHSAT008289.2	93.65	63	4	0	850	912	212	150	1e-17	93.7
XLOC_000748	NONHSAT150120.1	93.69	222	11	1	2	220	313	92	3e-88	325
XLOC_000749	NONHSAT150119.1	95.45	198	8	1	108	304	281	84	3e-84	313
XLOC_000750	NONHSAT150096.1	95.33	257	12	0	34	290	352	96	1e-114	414
XLOC_000751	NONHSAT133604.2	85.88	85	11	1	219	302	3573	3657	1e-09	65.9
XLOC_000752	NONHSAT007252.2	94.51	182	9	1	289	470	228	48	3e-72	274
XLOC_000752	NONHSAT007256.2	93.91	279	16	1	289	567	458	181	2e-113	410
XLOC_000753	NONHSAT154210.1	100	47	0	0	231	277	3005	3051	3e-18	93.7
XLOC_000755	NONHSAT214811.1	100	25	0	0	285	309	453	477	0.0005	50.1
XLOC_000755	NONHSAT214811.1	100	25	0	0	285	309	453	477	0.0005	50.1
XLOC_000756	NONHSAT223364.1	91.11	90	8	0	44	133	354	265	6e-25	115
XLOC_000758	NONHSAT194661.1	90.57	53	5	0	134	186	2293	2241	6e-10	65.9
XLOC_000759	NONHSAT179787.1	90.57	106	10	0	564	669	1495	1390	2e-28	131
XLOC_000760	NONHSAT001345.2	87.76	286	24	2	845	1129	2165	2440	5e-77	291
XLOC_000761	NONHSAT007450.2	93.67	158	10	0	38	195	207	50	1e-60	234
XLOC_000761	NONHSAT060841.2	94.29	35	2	0	211	245	288	254	9e-06	54
XLOC_000761	NONHSAT152515.1	92.31	91	7	0	215	305	228	138	1e-27	125
XLOC_000765	NONHSAT190368.1	88.64	44	5	0	562	605	885	842	0.0004	48.1
XLOC_000766	NONHSAT007615.2	94.56	294	12	2	387	676	1327	1034	2e-123	444
XLOC_000766	NONHSAT007615.2	94.58	295	12	2	449	739	1328	1034	5e-124	446
XLOC_000767	NONHSAT054868.2	89.47	57	6	0	983	1039	420	364	3e-09	65.9
XLOC_000768	NONHSAT152551.1	95.71	466	19	1	618	1083	1917	1453	0	757
XLOC_000768	NONHSAT007632.2	95.72	467	19	1	618	1084	1449	984	0	759
XLOC_000768	NONHSAT152552.1	95.71	466	19	1	618	1083	702	238	0	757
XLOC_000768	NONHSAT007632.2	95.73	468	19	1	618	1085	1449	983	0	761
XLOC_000768	NONHSAT152551.1	95.71	466	19	1	618	1083	1917	1453	0	757
XLOC_000768	NONHSAT152552.1	95.71	466	19	1	618	1083	702	238	0	757
XLOC_000768	NONHSAT152551.1	95.71	466	19	1	618	1083	1917	1453	0	757
XLOC_000768	NONHSAT152551.1	95.71	466	19	1	618	1083	1917	1453	0	757
XLOC_000769	NONHSAT152565.1	94.32	88	5	0	238	325	88	1	3e-30	135
XLOC_000769	NONHSAT152565.1	88.89	135	10	1	49	178	909	775	8e-35	149
XLOC_000769	NONHSAT152565.1	88.89	135	10	1	49	178	909	775	1e-34	149
XLOC_000769	NONHSAT007722.2	93.97	282	13	3	21	298	598	317	2e-111	402
XLOC_000769	NONHSAT152565.1	96.77	93	2	1	21	112	486	394	4e-36	153
XLOC_000770	NONHSAT007745.2	91.43	747	50	4	163	906	739	4	0	920
XLOC_000772	NONHSAT007755.2	95.66	507	19	2	191	696	640	136	0	817
XLOC_000773	NONHSAT195583.1	93.18	44	3	0	133	176	3166	3123	4e-09	63.9
XLOC_000775	NONHSAT154266.1	96.49	285	8	2	8	290	128	412	1e-131	470
XLOC_000777	NONHSAT007763.2	95.45	198	9	0	1910	2107	275	78	5e-86	321
XLOC_000778	NONHSAT201116.1	86.52	178	23	1	174	350	270	93	7e-36	155
XLOC_000778	NONHSAT027366.2	79.34	305	63	0	11	315	3878	3574	3e-21	105
XLOC_000778	NONHSAT027366.2	79.34	305	63	0	11	315	3878	3574	5e-21	105
XLOC_000778	NONHSAT007762.2	93.04	158	7	2	995	1152	452	299	5e-54	214
XLOC_000779	NONHSAT164329.1	83.76	234	32	3	47	279	1414	1642	2e-33	145
XLOC_000779	NONHSAT164329.1	83.76	234	32	3	47	279	1414	1642	2e-33	145
XLOC_000780	NONHSAT007794.2	96.36	110	4	0	84	193	546	437	2e-46	186
XLOC_000782	NONHSAT010818.2	91.35	370	32	0	1	370	491	122	3e-134	480
XLOC_000782	NONHSAT150905.1	92.13	178	14	0	354	531	372	195	1e-62	242
XLOC_000782	NONHSAT010818.2	90.65	310	29	0	354	663	431	122	2e-105	385
XLOC_000784	NONHSAT216107.1	93.75	32	2	0	54	85	1214	1183	0.0002	48.1
XLOC_000786	NONHSAT215888.1	92.11	114	9	0	1	114	6104	6217	2e-36	155
XLOC_000790	NONHSAT010677.2	98.33	60	1	0	50	109	732	791	3e-23	111
XLOC_000792	NONHSAT010633.2	95.71	233	9	1	20	252	232	1	1e-102	375
XLOC_000792	NONHSAT010633.2	95.71	233	9	1	20	252	232	1	8e-103	375
XLOC_000792	NONHSAT010633.2	95.71	233	9	1	20	252	232	1	8e-103	375
XLOC_000793	NONHSAT097833.2	92.42	66	4	1	103	168	152	88	2e-15	83.8
XLOC_000794	NONHSAT179435.1	90.3	165	16	0	1	165	1169	1005	2e-50	200
XLOC_000795	NONHSAT150861.1	100	33	0	0	450	482	124	92	1e-09	65.9
XLOC_000796	NONHSAT219996.1	88.52	244	28	0	81	324	10034	9791	1e-68	262
XLOC_000796	NONHSAT219996.1	88.52	244	28	0	81	324	10034	9791	1e-68	262
XLOC_000797	NONHSAT192221.1	92.62	271	20	0	2910	3180	23407	23137	7e-103	379
XLOC_000797	NONHSAT010538.2	90.08	867	83	3	5738	6602	866	1	0	1013
XLOC_000798	NONHSAT150839.1	97.96	49	1	0	684	732	93	45	1e-16	89.7
XLOC_000798	NONHSAT153242.1	97.4	77	2	0	687	763	3432	3508	6e-31	137
XLOC_000800	NONHSAT010485.2	92.94	3046	203	8	8	3049	3782	745	0	4107
XLOC_000801	NONHSAT010471.2	95.16	516	25	0	419	934	518	3	0	825
XLOC_000801	NONHSAT010471.2	95.16	516	25	0	356	871	518	3	0	825
XLOC_000801	NONHSAT010471.2	95.54	606	27	0	189	794	608	3	0	987
XLOC_000802	NONHSAT212535.1	88.49	139	16	0	112	250	1790	1652	2e-34	149
XLOC_000804	NONHSAT010292.2	92.79	222	16	0	647	868	576	797	2e-83	313
XLOC_000805	NONHSAT154765.1	94.79	211	11	0	181	391	2286	2076	1e-89	331
XLOC_000805	NONHSAT154765.1	94.91	216	11	0	181	396	2286	2071	1e-92	341
XLOC_000805	NONHSAT154765.1	94.74	209	11	0	181	389	2286	2078	7e-88	327
XLOC_000805	NONHSAT154765.1	94.88	215	11	0	181	395	2286	2072	2e-91	339
XLOC_000805	NONHSAT010292.2	95.26	211	9	1	33	242	812	1022	1e-89	331
XLOC_000806	NONHSAT150780.1	95.27	1312	56	2	18	1323	2205	894	0	2101
XLOC_000806	NONHSAT150780.1	95.27	1312	56	2	18	1323	2205	894	0	2101
XLOC_000806	NONHSAT150780.1	95.27	1310	56	2	18	1321	2205	896	0	2097
XLOC_000806	NONHSAT150780.1	95.27	1312	56	2	18	1323	2205	894	0	2101
XLOC_000807	NONHSAT123669.2	89.49	276	27	1	1693	1968	2488	2215	2e-82	311
XLOC_000808	NONHSAT193211.1	88.1	269	30	2	1941	2208	668	401	2e-68	264
XLOC_000811	NONHSAT153111.1	92.22	180	13	1	211	390	1	179	7e-51	202
XLOC_000812	NONHSAT010169.2	94.17	206	12	0	353	558	329	124	3e-84	313
XLOC_000813	NONHSAT214053.1	84.3	172	24	2	113	282	1902	1732	3e-24	113
XLOC_000814	NONHSAT075128.2	88.57	70	8	0	499	568	4973	4904	3e-12	75.8
XLOC_000816	NONHSAT150711.1	94.58	166	9	0	1	166	166	1	9e-68	258
XLOC_000816	NONHSAT150711.1	95.38	130	6	0	82	211	130	1	1e-53	210
XLOC_000817	NONHSAT192354.1	87.5	80	10	0	140	219	5866	5787	1e-13	79.8
XLOC_000818	NONHSAT140658.2	90.14	142	13	1	232	372	2572	2713	5e-39	163
XLOC_000819	NONHSAT150708.1	94.71	435	20	2	1	435	508	77	0	666
XLOC_000819	NONHSAT150708.1	94.58	424	20	2	1	424	508	88	0	644
XLOC_000821	NONHSAT080948.2	96.2	316	11	1	128	442	2	317	1e-147	523
XLOC_000821	NONHSAT080948.2	96.2	316	11	1	141	455	2	317	2e-147	523
XLOC_000822	NONHSAT189712.1	86.36	132	18	0	2460	2591	93	224	6e-25	119
XLOC_000824	NONHSAT080910.2	93.64	708	38	3	1116	1816	1831	2538	0	1031
XLOC_000825	NONHSAT080883.2	92.36	144	8	2	2124	2264	1	144	9e-45	184
XLOC_000826	NONHSAT080883.2	88.33	377	41	2	1	374	925	1301	4e-105	385
XLOC_000826	NONHSAT080883.2	91.55	142	12	0	1	142	1160	1301	8e-46	186
XLOC_000827	NONHSAT080876.2	93.09	1317	78	6	367	1672	2815	4129	0	1814
XLOC_000830	NONHSAT093885.2	90	250	22	1	828	1074	1864	1615	7e-78	293
XLOC_000830	NONHSAT093885.2	90	250	22	1	761	1007	1864	1615	2e-77	293
XLOC_000830	NONHSAT149752.1	90.62	96	8	1	276	370	406	311	1e-22	111
XLOC_000830	NONHSAT210796.1	86.21	58	8	0	1366	1423	7611	7668	5e-05	52
XLOC_000830	NONHSAT004512.2	91.44	222	19	0	1623	1844	3384	3163	3e-76	289
XLOC_000830	NONHSAT210796.1	86.21	58	8	0	527	584	7611	7668	2e-05	52
XLOC_000830	NONHSAT004512.2	91.44	222	19	0	842	1063	3384	3163	2e-76	289
XLOC_000830	NONHSAT210796.1	86.21	58	8	0	495	552	7611	7668	2e-05	52
XLOC_000831	NONHSAT002201.2	88.19	271	32	0	1574	1844	4440	4170	1e-74	283
XLOC_000834	NONHSAT080758.2	86.32	541	52	4	571	1101	292	820	5e-137	490
XLOC_000834	NONHSAT080758.2	86.32	541	52	4	346	876	292	820	4e-137	490
XLOC_000834	NONHSAT080758.2	86.32	541	52	4	411	941	292	820	5e-137	490
XLOC_000835	NONHSAT080752.2	90.6	1607	132	8	7	1607	1038	2631	0	1947
XLOC_000837	NONHSAT189937.1	92	100	8	0	962	1061	144	243	4e-30	135
XLOC_000837	NONHSAT158410.1	93.06	72	5	0	10	81	654	725	3e-21	103
XLOC_000837	NONHSAT080706.2	96.03	126	5	0	66	191	261	136	9e-53	210
XLOC_000839	NONHSAT216633.1	86.11	108	15	0	58	165	945	1052	2e-18	95.6
XLOC_000842	NONHSAT189911.1	96.45	591	21	0	175	765	1	591	0	952
XLOC_000843	NONHSAT132006.2	94.74	38	2	0	1559	1596	983	946	3e-07	60
XLOC_000844	NONHSAT080588.2	94.69	377	17	1	22	398	1	374	9e-166	585
XLOC_000844	NONHSAT080580.2	90.62	373	12	4	298	649	449	819	2e-130	468
XLOC_000846	NONHSAT190507.1	91.3	276	21	1	43	315	1898	1623	2e-96	353
XLOC_000847	NONHSAT080494.2	88.99	218	16	1	107	316	156	373	1e-64	248
XLOC_000848	NONHSAT189855.1	88.61	79	9	0	593	671	314	392	2e-15	85.7
XLOC_000849	NONHSAT189840.1	94.92	59	3	0	508	566	377	435	6e-18	93.7
XLOC_000850	NONHSAT080425.2	92.34	274	13	1	115	380	261	534	4e-105	383
XLOC_000851	NONHSAT189818.1	90.96	332	25	2	25	354	236	564	2e-113	410
XLOC_000853	NONHSAT137578.2	95.65	69	3	0	1	69	40	108	4e-24	113
XLOC_000858	NONHSAT189782.1	93.55	682	36	4	2312	2991	1590	2265	0	866
XLOC_000858	NONHSAT189782.1	93.55	682	36	4	1835	2514	1590	2265	0	866
XLOC_000858	NONHSAT189782.1	93.55	682	36	4	2651	3330	1590	2265	0	866
XLOC_000858	NONHSAT189782.1	93.55	682	36	4	2129	2808	1590	2265	0	866
XLOC_000858	NONHSAT080276.2	92.47	730	40	4	589	1303	1217	488	0	1001
XLOC_000858	NONHSAT080276.2	91.9	531	29	3	1210	1726	1018	488	0	710
XLOC_000859	NONHSAT080219.2	93.87	1712	86	6	5542	7238	1974	3681	0	2498
XLOC_000861	NONHSAT188841.1	92.15	395	28	3	230	621	115	509	3e-144	513
XLOC_000861	NONHSAT188841.1	92.23	399	28	3	221	616	115	513	1e-146	521
XLOC_000861	NONHSAT188841.1	92.23	399	28	3	332	727	115	513	1e-146	521
XLOC_000861	NONHSAT188841.1	92.23	399	28	3	215	610	115	513	1e-146	521
XLOC_000861	NONHSAT188841.1	88.28	418	27	4	215	629	115	513	2e-123	444
XLOC_000861	NONHSAT188841.1	92.16	204	14	2	215	416	115	318	9e-69	262
XLOC_000862	NONHSAT188867.1	93	243	17	0	252	494	579	337	4e-94	347
XLOC_000862	NONHSAT188864.1	90.79	152	14	0	249	400	3865	3714	2e-47	190
XLOC_000862	NONHSAT080105.2	91.67	48	3	1	236	283	152	106	7e-07	56
XLOC_000862	NONHSAT055369.2	96.77	31	1	0	414	444	858	888	4e-06	54
XLOC_000862	NONHSAT188866.1	93.94	198	12	0	1	198	198	1	1e-79	297
XLOC_000862	NONHSAT188864.1	90.79	152	14	0	53	204	3865	3714	1e-47	190
XLOC_000863	NONHSAT188830.1	96.46	113	3	1	1	113	2181	2070	7e-46	184
XLOC_000866	NONHSAT080546.2	83.33	360	42	6	2555	2896	7921	7562	2e-53	214
XLOC_000866	NONHSAT080546.2	83.33	360	42	6	2538	2879	7921	7562	2e-53	214
XLOC_000867	NONHSAT058809.2	100	33	0	0	95	127	717	685	2e-09	65.9
XLOC_000868	NONHSAT207166.1	93.33	105	6	1	111	214	1673	1569	4e-33	145
XLOC_000868	NONHSAT150114.1	93.82	178	11	0	1435	1612	248	71	2e-69	266
XLOC_000869	NONHSAT033338.2	93.33	45	3	0	466	510	3584	3540	1e-09	65.9
XLOC_000870	NONHSAT166329.1	91.6	381	27	3	573	950	1386	1764	2e-134	482
XLOC_000870	NONHSAT166329.1	91.6	381	27	3	550	927	1386	1764	2e-134	482
XLOC_000871	NONHSAT079899.2	90.99	577	45	3	1335	1911	814	1383	0	716
XLOC_000874	NONHSAT079758.2	94.1	390	17	2	381	764	343	732	3e-165	583
XLOC_000876	NONHSAT190282.1	94.68	188	10	0	306	493	544	357	3e-78	293
XLOC_000876	NONHSAT190282.1	94.68	188	10	0	268	455	544	357	3e-78	293
XLOC_000877	NONHSAT079622.2	92.48	319	21	1	263	578	973	1291	9e-122	438
XLOC_000877	NONHSAT079622.2	92.9	338	21	1	29	363	954	1291	3e-133	476
XLOC_000878	NONHSAT189628.1	99.57	235	1	0	1	235	17	251	1e-127	458
XLOC_000878	NONHSAT189628.1	99.51	206	1	0	1	206	46	251	2e-110	400
XLOC_000879	NONHSAT079548.2	95.94	689	14	7	1	678	936	1621	0	1076
XLOC_000880	NONHSAT079488.2	91.03	591	31	5	476	1054	298	878	0	745
XLOC_000880	NONHSAT079488.2	91.03	591	31	5	248	826	298	878	0	745
XLOC_000881	NONHSAT149964.1	90.48	42	4	0	1261	1302	564	605	6e-05	52
XLOC_000881	NONHSAT148760.1	88.35	266	28	1	401	666	12550	12288	5e-66	254
XLOC_000881	NONHSAT149964.1	90.48	42	4	0	1163	1204	564	605	6e-05	52
XLOC_000882	NONHSAT002922.2	100	37	0	0	1	37	2084	2048	1e-11	73.8
XLOC_000883	NONHSAT079414.2	93.43	578	34	1	55	628	1	578	0	842
XLOC_000884	NONHSAT189585.1	100	50	0	0	433	482	59	108	8e-20	99.6
XLOC_000885	NONHSAT079366.2	93.86	1189	57	10	115	1301	2458	3632	0	1673
XLOC_000885	NONHSAT079366.2	97.06	136	4	0	43	178	2458	2593	4e-61	238
XLOC_000886	NONHSAT211683.1	87.93	555	63	4	1512	2063	3622	3069	5e-151	537
XLOC_000886	NONHSAT211683.1	87.93	555	63	4	1510	2061	3622	3069	5e-151	537
XLOC_000887	NONHSAT189182.1	95.08	1341	63	3	526	1865	1556	218	0	2111
XLOC_000889	NONHSAT078078.2	90.25	790	64	4	100	881	188	972	0	942
XLOC_000890	NONHSAT112941.2	91.4	93	8	0	1	93	3187	3095	4e-26	121
XLOC_000890	NONHSAT087667.2	90.85	142	12	1	279	419	1830	1689	2e-41	170
XLOC_000890	NONHSAT189992.1	93.9	164	10	0	258	421	36	199	5e-64	246
XLOC_000890	NONHSAT211573.1	90.87	252	23	0	478	729	1695	1444	7e-85	317
XLOC_000890	NONHSAT087667.2	90.85	142	12	1	272	412	1830	1689	2e-41	170
XLOC_000890	NONHSAT148276.1	96.3	27	1	0	185	211	557	531	0.0005	46.1
XLOC_000890	NONHSAT197539.1	96.55	29	1	0	560	588	245	273	0.0001	50.1
XLOC_000890	NONHSAT197539.1	96.55	29	1	0	584	612	245	273	0.0001	50.1
XLOC_000890	NONHSAT189992.1	93.9	164	10	0	298	461	36	199	5e-64	246
XLOC_000891	NONHSAT181866.1	87.64	178	21	1	309	486	2743	2919	3e-41	170
XLOC_000892	NONHSAT078083.2	95.25	421	19	1	137	556	683	263	4e-164	579
XLOC_000893	NONHSAT188354.1	88.57	315	23	5	382	685	382	694	1e-84	315
XLOC_000893	NONHSAT188354.1	89.21	315	24	5	382	688	382	694	1e-87	325
XLOC_000893	NONHSAT188354.1	88.57	315	23	5	358	661	382	694	1e-84	315
XLOC_000893	NONHSAT196025.1	97.62	42	1	0	862	903	8865	8824	3e-12	75.8
XLOC_000893	NONHSAT188354.1	89.21	315	24	5	800	1106	382	694	2e-87	325
XLOC_000893	NONHSAT196025.1	97.62	42	1	0	541	582	8865	8824	2e-12	75.8
XLOC_000893	NONHSAT188354.1	89.14	313	24	5	208	512	384	694	1e-86	321
XLOC_000893	NONHSAT189197.1	96.47	170	6	0	416	585	404	235	4e-76	289
XLOC_000893	NONHSAT189197.1	96.47	170	6	0	567	736	404	235	4e-76	289
XLOC_000893	NONHSAT189197.1	96.47	170	6	0	488	657	404	235	4e-76	289
XLOC_000893	NONHSAT189197.1	96.47	170	6	0	567	736	404	235	4e-76	289
XLOC_000893	NONHSAT222678.1	88.49	278	27	4	1378	1651	803	527	1e-69	268
XLOC_000893	NONHSAT180555.1	85.8	176	23	2	55	229	41	215	8e-31	135
XLOC_000893	NONHSAT189197.1	96.47	170	6	0	526	695	404	235	4e-76	289
XLOC_000893	NONHSAT189197.1	96.47	170	6	0	428	597	404	235	4e-76	289
XLOC_000893	NONHSAT189197.1	96.47	170	6	0	426	595	404	235	4e-76	289
XLOC_000893	NONHSAT189197.1	96.47	170	6	0	500	669	404	235	4e-76	289
XLOC_000893	NONHSAT189197.1	96.47	170	6	0	405	574	404	235	4e-76	289
XLOC_000893	NONHSAT189197.1	96.47	170	6	0	325	494	404	235	4e-76	289
XLOC_000893	NONHSAT222678.1	88.49	278	27	4	1158	1431	803	527	1e-69	268
XLOC_000893	NONHSAT222678.1	88.49	278	27	4	840	1113	803	527	1e-69	268
XLOC_000894	NONHSAT186826.1	91.67	48	4	0	434	481	1671	1718	5e-09	63.9
XLOC_000895	NONHSAT217790.1	92.24	116	9	0	801	916	1408	1293	2e-37	159
XLOC_000895	NONHSAT217790.1	92.24	116	9	0	596	711	1408	1293	2e-37	159
XLOC_000896	NONHSAT188364.1	90.78	141	12	1	1	141	108	247	1e-40	168
XLOC_000896	NONHSAT188364.1	90.78	141	12	1	1	141	108	247	9e-41	168
XLOC_000896	NONHSAT188364.1	90.78	141	12	1	1	141	108	247	1e-40	168
XLOC_000897	NONHSAT131733.2	96.97	33	1	0	489	521	600	632	4e-07	58
XLOC_000898	NONHSAT036762.2	92.59	54	4	0	980	1033	2094	2147	3e-12	75.8
XLOC_000898	NONHSAT036762.2	92.59	54	4	0	583	636	2094	2147	2e-12	75.8
XLOC_000898	NONHSAT036762.2	92.59	54	4	0	569	622	2094	2147	2e-12	75.8
XLOC_000900	NONHSAT188377.1	92.71	288	21	0	210	497	5	292	3e-111	404
XLOC_000900	NONHSAT078249.2	95.44	439	14	3	1	437	756	322	0	694
XLOC_000901	NONHSAT191610.1	93.75	32	2	0	104	135	763	732	0.0001	48.1
XLOC_000902	NONHSAT188423.1	95.11	327	16	0	338	664	415	741	2e-146	521
XLOC_000904	NONHSAT069885.2	91.39	267	23	0	536	802	900	634	9e-94	347
XLOC_000906	NONHSAT189316.1	91.67	252	21	0	193	444	519	268	6e-90	333
XLOC_000907	NONHSAT078608.2	94.57	258	11	2	17	271	1	258	1e-106	387
XLOC_000908	NONHSAT171024.1	94.74	38	2	0	549	586	205	168	9e-08	60
XLOC_000909	NONHSAT201121.1	90.32	62	6	0	312	373	99	38	2e-12	75.8
XLOC_000909	NONHSAT201121.1	90.32	62	6	0	312	373	99	38	2e-12	75.8
XLOC_000910	NONHSAT188473.1	95.15	103	5	0	65	167	483	585	8e-40	165
XLOC_000915	NONHSAT193388.1	100	27	0	0	869	895	135	161	1e-05	54
XLOC_000916	NONHSAT183744.1	92.79	111	7	1	152	261	122	232	7e-35	149
XLOC_000917	NONHSAT182419.1	90.7	43	4	0	248	290	43	1	6e-06	54
XLOC_000917	NONHSAT211647.1	87.5	56	7	0	400	455	5727	5782	2e-06	56
XLOC_000917	NONHSAT211647.1	87.5	56	7	0	1218	1273	5727	5782	4e-06	56
XLOC_000917	NONHSAT211647.1	87.5	56	7	0	552	607	5727	5782	2e-06	56
XLOC_000917	NONHSAT189399.1	98.28	58	1	0	711	768	194	137	1e-21	107
XLOC_000918	NONHSAT078820.2	91.92	1040	66	6	5	1035	291	1321	0	1332
XLOC_000919	NONHSAT188511.1	92.3	1390	85	9	62	1434	127	1511	0	1838
XLOC_000920	NONHSAT078881.2	93.39	832	43	6	137	962	48	873	0	1178
XLOC_000920	NONHSAT078881.2	93.4	833	43	6	84	910	47	873	0	1179
XLOC_000920	NONHSAT078881.2	93.4	833	43	6	62	888	47	873	0	1179
XLOC_000920	NONHSAT078881.2	93.4	833	43	6	14	840	47	873	0	1179
XLOC_000921	NONHSAT127031.2	94.2	69	2	2	516	582	231	299	1e-16	89.7
XLOC_000922	NONHSAT197153.1	92.73	55	2	1	129	181	393	339	9e-12	71.9
XLOC_000922	NONHSAT078951.2	95.97	471	17	1	98	566	264	734	0	777
XLOC_000922	NONHSAT188545.1	93.48	368	24	0	158	525	1	368	9e-152	539
XLOC_000922	NONHSAT078950.2	94.76	668	34	1	217	884	358	1024	0	942
XLOC_000922	NONHSAT078951.2	95.97	472	17	1	492	961	263	734	0	779
XLOC_000922	NONHSAT078950.2	95.59	204	9	0	1	204	19	222	2e-90	333
XLOC_000922	NONHSAT078950.2	94.67	225	10	1	1	223	41	265	4e-94	345
XLOC_000922	NONHSAT078950.2	94.15	804	44	2	401	1202	222	1024	0	1110
XLOC_000922	NONHSAT078951.2	95.96	470	17	1	46	513	265	734	0	775
XLOC_000923	NONHSAT079029.2	91.33	542	35	8	3	536	1684	2221	0	646
XLOC_000923	NONHSAT079029.2	93.33	45	3	0	1	45	2178	2222	7e-10	65.9
XLOC_000925	NONHSAT188592.1	94.74	304	15	1	37	340	1	303	2e-130	468
XLOC_000926	NONHSAT181433.1	86.74	264	34	1	165	428	3522	3260	4e-61	238
XLOC_000926	NONHSAT188597.1	83.62	116	12	1	154	269	213	321	5e-15	83.8
XLOC_000926	NONHSAT181433.1	86.74	264	34	1	392	655	3522	3260	2e-61	238
XLOC_000927	NONHSAT189494.1	92.59	270	19	1	1215	1483	851	582	2e-100	369
XLOC_000927	NONHSAT189494.1	92.59	270	19	1	1090	1358	851	582	2e-100	369
XLOC_000927	NONHSAT189494.1	92.59	270	19	1	877	1145	851	582	1e-100	369
XLOC_000928	NONHSAT079114.2	95.29	297	13	1	347	643	118	413	3e-131	470
XLOC_000929	NONHSAT188607.1	93.7	349	22	0	36	384	1326	1674	8e-146	517
XLOC_000931	NONHSAT190218.1	91.34	543	45	2	353	895	561	1101	0	688
XLOC_000934	NONHSAT079168.2	86.24	109	15	0	1	109	89	197	3e-19	97.6
XLOC_000935	NONHSAT083965.2	88.81	134	15	0	15	148	526	659	2e-34	147
XLOC_000936	NONHSAT126571.2	96	75	3	0	857	931	3561	3487	3e-27	125
XLOC_000936	NONHSAT126571.2	96	75	3	0	887	961	3561	3487	3e-27	125
XLOC_000936	NONHSAT126571.2	96	75	3	0	654	728	3561	3487	2e-27	125
XLOC_000936	NONHSAT194117.1	96.81	188	5	1	1123	1310	1459	1645	5e-85	317
XLOC_000936	NONHSAT208156.1	89.31	131	13	1	513	643	2260	2389	9e-32	141
XLOC_000938	NONHSAT191952.1	97.78	360	8	0	153	512	686	1045	4e-173	609
XLOC_000939	NONHSAT191957.1	99.53	214	1	0	97	310	1	214	3e-115	416
XLOC_000939	NONHSAT191957.1	99.53	214	1	0	92	305	1	214	2e-115	416
XLOC_000939	NONHSAT191957.1	100	174	0	0	34	207	41	214	8e-94	345
XLOC_000941	NONHSAT193117.1	92.42	488	31	2	313	794	488	1	0	666
XLOC_000941	NONHSAT193117.1	92.42	488	31	2	82	563	488	1	0	666
XLOC_000941	NONHSAT193117.1	92.42	488	31	2	565	1046	488	1	0	666
XLOC_000941	NONHSAT193117.1	92.42	488	31	2	448	929	488	1	0	666
XLOC_000941	NONHSAT193117.1	92.42	488	31	2	102	583	488	1	0	666
XLOC_000942	NONHSAT192003.1	92.98	228	16	0	4	231	88	315	1e-87	325
XLOC_000942	NONHSAT192003.1	92.72	302	22	0	1	302	132	433	2e-117	424
XLOC_000944	NONHSAT083436.2	91.58	202	14	2	552	750	276	75	1e-65	252
XLOC_000944	NONHSAT141501.2	88.51	87	9	1	537	622	1172	1086	2e-15	85.7
XLOC_000944	NONHSAT083436.2	91.58	202	14	2	648	846	276	75	2e-65	252
XLOC_000945	NONHSAT159226.1	93.68	190	12	0	430	619	2358	2169	5e-62	240
XLOC_000946	NONHSAT192029.1	90.79	228	19	2	311	536	5	232	7e-71	270
XLOC_000947	NONHSAT083544.2	91.12	1137	78	4	107	1225	2903	4034	0	1342
XLOC_000949	NONHSAT212496.1	84.69	98	15	0	265	362	1637	1734	1e-12	75.8
XLOC_000950	NONHSAT083625.2	92.22	90	7	0	7	96	25	114	4e-27	123
XLOC_000950	NONHSAT174881.1	97.27	110	3	0	1279	1388	1708	1817	6e-48	194
XLOC_000950	NONHSAT174881.1	97.27	110	3	0	1484	1593	1708	1817	6e-48	194
XLOC_000951	NONHSAT148396.1	94.67	75	4	0	1	75	1780	1706	1e-24	117
XLOC_000952	NONHSAT192041.1	93.08	159	11	0	137	295	1375	1533	8e-59	228
XLOC_000953	NONHSAT204506.1	86.21	145	18	1	300	442	46	190	6e-27	123
XLOC_000955	NONHSAT083883.2	100	34	0	0	108	141	545	512	2e-10	67.9
XLOC_000957	NONHSAT083632.2	90.8	609	52	1	1	605	2729	3337	0	761
XLOC_000958	NONHSAT084360.2	91.14	745	51	6	4	738	2430	3169	0	896
XLOC_000960	NONHSAT158435.1	90	60	6	0	146	205	6635	6576	9e-12	71.9
XLOC_000961	NONHSAT192159.1	91.57	178	11	2	106	282	570	396	7e-57	222
XLOC_000962	NONHSAT084392.2	92.58	391	28	1	147	536	49	439	4e-139	496
XLOC_000963	NONHSAT084422.2	89	200	19	1	13	209	1	200	8e-56	218
XLOC_000963	NONHSAT084420.2	91.67	252	21	0	9	260	31	282	2e-90	333
XLOC_000964	NONHSAT084427.2	90.57	424	23	3	1	424	12	418	1e-148	527
XLOC_000965	NONHSAT222056.1	100	38	0	0	1	38	1003	966	1e-12	75.8
XLOC_000968	NONHSAT148964.1	92.86	42	3	0	753	794	799	840	2e-07	60
XLOC_000969	NONHSAT192179.1	93.1	3523	213	16	43	3542	173	3688	0	4916
XLOC_000969	NONHSAT192179.1	93.37	3695	215	16	3	3674	1	3688	0	5241
XLOC_000969	NONHSAT192179.1	93.53	1854	108	5	56	1899	172	2023	0	2698
XLOC_000969	NONHSAT192181.1	93.05	3441	209	16	48	3465	329	3762	0	4785
XLOC_000970	NONHSAT192182.1	93.2	206	14	0	70	275	559	764	2e-79	297
XLOC_000970	NONHSAT192182.1	94.16	154	9	0	60	213	559	712	9e-61	234
XLOC_000971	NONHSAT084546.2	94.48	145	8	0	64	208	209	353	7e-57	224
XLOC_000972	NONHSAT084551.2	93.85	423	24	1	1	423	43	463	1e-178	626
XLOC_000972	NONHSAT192182.1	90.35	456	25	2	1	456	2244	2680	2e-162	573
XLOC_000972	NONHSAT192182.1	88.24	357	23	2	416	772	2343	2680	6e-108	392
XLOC_000973	NONHSAT192189.1	97.75	178	4	0	1	178	481	658	5e-87	321
XLOC_000974	NONHSAT084588.2	94.92	413	20	1	53	465	195	606	0	644
XLOC_000974	NONHSAT084588.2	94.92	413	20	1	49	461	195	606	0	644
XLOC_000974	NONHSAT084588.2	94.92	413	20	1	49	461	195	606	0	644
XLOC_000974	NONHSAT084588.2	94.92	413	20	1	49	461	195	606	0	644
XLOC_000974	NONHSAT084588.2	94.92	413	20	1	49	461	195	606	0	644
XLOC_000974	NONHSAT084588.2	94.92	413	20	1	49	461	195	606	0	644
XLOC_000974	NONHSAT084588.2	94.92	413	20	1	49	461	195	606	0	644
XLOC_000974	NONHSAT084588.2	94.92	413	20	1	49	461	195	606	0	644
XLOC_000974	NONHSAT084588.2	94.92	413	20	1	49	461	195	606	0	644
XLOC_000974	NONHSAT084588.2	93.45	336	18	2	1	333	272	606	4e-134	480
XLOC_000975	NONHSAT084626.2	88.93	813	64	8	2034	2835	392	1189	0	795
XLOC_000976	NONHSAT084639.2	90.61	181	14	2	12	189	407	587	8e-53	210
XLOC_000976	NONHSAT084639.2	90.66	182	14	2	32	210	406	587	2e-53	212
XLOC_000977	NONHSAT084657.2	94.95	218	11	0	22	239	47	264	5e-94	345
XLOC_000977	NONHSAT084661.2	94.79	211	11	0	11	221	164	374	8e-90	331
XLOC_000977	NONHSAT192222.1	94.12	136	8	0	1	136	395	530	3e-52	206
XLOC_000977	NONHSAT204379.1	98.7	77	1	0	243	319	392	316	1e-33	145
XLOC_000977	NONHSAT192222.1	94.08	152	9	0	384	535	568	719	4e-59	230
XLOC_000980	NONHSAT171351.1	87.1	124	16	0	38	161	130	253	4e-26	119
XLOC_000981	NONHSAT166873.1	93.1	58	4	0	169	226	150	207	2e-15	83.8
XLOC_000982	NONHSAT084878.2	93.44	244	8	2	46	285	67	306	2e-96	353
XLOC_000984	NONHSAT193170.1	94.44	504	26	1	116	617	413	916	0	771
XLOC_000986	NONHSAT192284.1	94.2	345	17	3	63	404	1	345	2e-140	502
XLOC_000988	NONHSAT192863.1	94.55	55	3	0	1	55	422	368	5e-15	85.7
XLOC_000988	NONHSAT192863.1	93.02	43	3	0	1	43	410	368	7e-08	61.9
XLOC_000989	NONHSAT085070.2	94.15	376	20	2	223	597	76	450	4e-144	513
XLOC_000990	NONHSAT072980.2	94.04	151	9	0	831	981	968	818	3e-58	228
XLOC_000990	NONHSAT072980.2	93.92	181	11	0	1032	1212	968	788	4e-71	272
XLOC_000991	NONHSAT191794.1	100	25	0	0	2381	2405	1357	1381	0.0004	50.1
XLOC_000991	NONHSAT191794.1	100	25	0	0	1013	1037	1357	1381	0.0002	50.1
XLOC_000991	NONHSAT191794.1	100	25	0	0	2033	2057	1357	1381	0.0003	50.1
XLOC_000991	NONHSAT191794.1	100	25	0	0	2239	2263	1357	1381	0.0004	50.1
XLOC_000991	NONHSAT192313.1	100	150	0	0	60	209	1	150	7e-80	297
XLOC_000992	NONHSAT085122.2	97.4	77	2	0	40	116	1	77	1e-30	137
XLOC_000992	NONHSAT185071.1	88.81	277	31	0	559	835	3018	2742	1e-80	303
XLOC_000992	NONHSAT160797.1	88.19	127	15	0	687	813	112	238	2e-29	133
XLOC_000992	NONHSAT192328.1	94.39	214	10	1	23	234	1	214	1e-86	323
XLOC_000992	NONHSAT185071.1	88.81	277	31	0	278	554	3018	2742	8e-81	303
XLOC_000993	NONHSAT085132.2	95.59	68	3	0	5	72	414	347	3e-23	111
XLOC_000994	NONHSAT180882.1	89.83	59	6	0	129	187	280	222	5e-11	69.9
XLOC_000994	NONHSAT212863.1	100	39	0	0	1	39	3009	2971	3e-13	77.8
XLOC_000994	NONHSAT180882.1	89.83	59	6	0	216	274	280	222	6e-11	69.9
XLOC_000995	NONHSAT153653.1	91.15	226	20	0	90	315	328	553	4e-77	289
XLOC_000996	NONHSAT086649.2	91.35	2012	140	7	111	2090	2029	4038	0	2506
XLOC_000996	NONHSAT086649.2	91.35	2012	140	7	126	2105	2029	4038	0	2506
XLOC_000997	NONHSAT086658.2	95.2	750	25	2	1	749	36	775	0	1203
XLOC_000997	NONHSAT192352.1	93.26	193	10	3	1	192	374	564	5e-67	256
XLOC_000999	NONHSAT043887.2	88.89	45	5	0	200	244	358	402	7e-05	50.1
XLOC_000999	NONHSAT043887.2	88.89	45	5	0	47	91	358	402	5e-05	50.1
XLOC_001001	NONHSAT192374.1	93.61	407	26	0	303	709	157	563	8e-170	601
XLOC_001001	NONHSAT192374.1	93.61	407	26	0	681	1087	157	563	8e-170	601
XLOC_001002	NONHSAT168563.1	91.51	106	9	0	477	582	4954	4849	4e-31	139
XLOC_001003	NONHSAT086793.2	93.62	847	51	2	1373	2217	846	1	0	1237
XLOC_001004	NONHSAT008757.2	87.3	126	16	0	45	170	219	94	4e-27	123
XLOC_001005	NONHSAT194561.1	88.12	261	30	1	1	260	2547	2287	8e-69	264
XLOC_001006	NONHSAT022895.2	87.54	281	34	1	886	1166	840	1119	7e-71	272
XLOC_001007	NONHSAT086871.2	98.15	54	1	0	3	56	93	146	1e-19	99.6
XLOC_001008	NONHSAT192210.1	100	29	0	0	83	111	5838	5810	3e-07	58
XLOC_001009	NONHSAT087000.2	97.26	401	10	1	549	949	1193	1592	0	700
XLOC_001009	NONHSAT087000.2	97.26	401	10	1	556	956	1193	1592	0	700
XLOC_001010	NONHSAT087019.2	91.76	558	28	1	4	543	150	707	0	767
XLOC_001014	NONHSAT192460.1	91.35	185	15	1	5	189	18	201	3e-60	232
XLOC_001016	NONHSAT136381.2	91.58	190	15	1	441	630	1754	1942	1e-62	242
XLOC_001017	NONHSAT192989.1	95.75	612	22	3	64	672	3590	2980	0	985
XLOC_001017	NONHSAT192989.1	95.75	612	22	3	91	699	3590	2980	0	985
XLOC_001018	NONHSAT212567.1	97.22	36	1	0	15	50	505	540	5e-09	63.9
XLOC_001020	NONHSAT192999.1	88.66	776	73	6	360	1130	9836	9071	0	811
XLOC_001020	NONHSAT192999.1	90.62	448	40	2	360	807	9836	9391	5e-152	539
XLOC_001020	NONHSAT192999.1	88.65	775	73	6	342	1111	9835	9071	0	809
XLOC_001021	NONHSAT087353.2	92.62	244	18	0	1	244	50	293	3e-92	341
XLOC_001021	NONHSAT087353.2	92.62	244	18	0	1	244	50	293	4e-92	341
XLOC_001021	NONHSAT087358.2	94.03	201	12	0	956	1156	195	395	1e-80	303
XLOC_001021	NONHSAT087358.2	94.03	201	12	0	1181	1381	195	395	1e-80	303
XLOC_001021	NONHSAT087358.2	94.03	201	12	0	2298	2498	195	395	2e-80	303
XLOC_001021	NONHSAT087358.2	94.03	201	12	0	1198	1398	195	395	1e-80	303
XLOC_001021	NONHSAT087358.2	94.03	201	12	0	2315	2515	195	395	2e-80	303
XLOC_001021	NONHSAT087358.2	94.03	201	12	0	1997	2197	195	395	2e-80	303
XLOC_001021	NONHSAT087358.2	94.03	201	12	0	1997	2197	195	395	2e-80	303
XLOC_001021	NONHSAT087358.2	94.03	201	12	0	1997	2197	195	395	2e-80	303
XLOC_001021	NONHSAT087358.2	94.03	201	12	0	1997	2197	195	395	2e-80	303
XLOC_001021	NONHSAT087358.2	94.03	201	12	0	1666	1866	195	395	1e-80	303
XLOC_001021	NONHSAT087358.2	94.03	201	12	0	2657	2857	195	395	2e-80	303
XLOC_001021	NONHSAT087358.2	94.03	201	12	0	1505	1705	195	395	1e-80	303
XLOC_001021	NONHSAT087358.2	94.03	201	12	0	1718	1918	195	395	1e-80	303
XLOC_001021	NONHSAT087358.2	94.03	201	12	0	1712	1912	195	395	2e-80	303
XLOC_001021	NONHSAT192510.1	91.98	162	12	1	731	891	1282	1443	8e-53	210
XLOC_001021	NONHSAT192510.1	91.98	162	12	1	710	870	1282	1443	8e-53	210
XLOC_001023	NONHSAT222724.1	88.89	72	8	0	149	220	12281	12210	1e-13	79.8
XLOC_001024	NONHSAT165850.1	96.67	270	9	0	153	422	1199	930	3e-129	464
XLOC_001025	NONHSAT162847.1	96.77	31	1	0	58	88	1257	1287	2e-06	54
XLOC_001027	NONHSAT055738.2	96.97	33	1	0	790	822	2797	2829	7e-07	58
XLOC_001027	NONHSAT087388.2	94.06	404	24	0	254	657	1	404	2e-173	611
XLOC_001027	NONHSAT087388.2	94.06	404	24	0	1165	1568	1	404	4e-173	611
XLOC_001027	NONHSAT193024.1	94.83	232	10	1	360	589	495	264	7e-98	359
XLOC_001027	NONHSAT087388.2	94.04	470	28	0	273	742	1	470	0	710
XLOC_001027	NONHSAT087388.2	94.04	470	28	0	623	1092	1	470	0	710
XLOC_001027	NONHSAT098468.2	89.64	251	24	1	1055	1305	29867	30115	3e-65	252
XLOC_001027	NONHSAT087388.2	94.06	404	24	0	230	633	1	404	1e-173	611
XLOC_001027	NONHSAT087388.2	94.06	404	24	0	355	758	1	404	2e-173	611
XLOC_001027	NONHSAT087388.2	94.06	404	24	0	355	758	1	404	2e-173	611
XLOC_001027	NONHSAT087388.2	94.06	404	24	0	355	758	1	404	2e-173	611
XLOC_001027	NONHSAT087388.2	94.06	404	24	0	319	722	1	404	2e-173	611
XLOC_001027	NONHSAT087388.2	94.06	404	24	0	319	722	1	404	2e-173	611
XLOC_001027	NONHSAT087388.2	94.06	404	24	0	319	722	1	404	2e-173	611
XLOC_001027	NONHSAT087388.2	94.06	404	24	0	398	801	1	404	2e-173	611
XLOC_001027	NONHSAT087388.2	94.06	404	24	0	398	801	1	404	2e-173	611
XLOC_001027	NONHSAT192524.1	95	40	2	0	189	228	584	623	3e-09	63.9
XLOC_001029	NONHSAT087397.2	86.98	192	25	0	1	192	546	355	3e-45	182
XLOC_001030	NONHSAT144776.2	87.68	138	16	1	317	453	736	873	5e-29	131
XLOC_001030	NONHSAT144776.2	87.68	138	16	1	418	554	736	873	6e-29	131
XLOC_001032	NONHSAT191518.1	89.32	281	28	1	993	1273	1892	1614	9e-84	313
XLOC_001033	NONHSAT193054.1	91.79	268	22	0	235	502	344	77	2e-97	357
XLOC_001034	NONHSAT192588.1	91.07	448	35	5	455	899	1	446	3e-149	531
XLOC_001034	NONHSAT192588.1	91.07	448	35	5	394	838	1	446	3e-149	531
XLOC_001034	NONHSAT192588.1	91.07	448	35	5	160	604	1	446	3e-149	531
XLOC_001034	NONHSAT087520.2	91.62	489	39	2	493	979	5	493	2e-178	628
XLOC_001034	NONHSAT192588.1	91.07	448	35	5	166	610	1	446	3e-149	531
XLOC_001035	NONHSAT087519.2	91.8	1280	87	8	1077	2346	1891	3162	0	1556
XLOC_001036	NONHSAT222500.1	94.83	58	3	0	926	983	436	493	4e-17	91.7
XLOC_001036	NONHSAT222500.1	94.83	58	3	0	650	707	436	493	3e-17	91.7
XLOC_001037	NONHSAT159449.1	100	29	0	0	1414	1442	505	477	2e-06	58
XLOC_001038	NONHSAT094422.2	88.46	234	22	2	282	511	1203	971	4e-62	240
XLOC_001039	NONHSAT185379.1	95.18	83	4	0	1	83	45	127	4e-30	133
XLOC_001039	NONHSAT087544.2	93.65	63	4	0	1	63	145	207	4e-18	93.7
XLOC_001040	NONHSAT081040.2	93.65	315	17	2	1	313	358	45	3e-126	452
XLOC_001041	NONHSAT188392.1	83.21	131	22	0	736	866	4252	4122	3e-15	85.7
XLOC_001041	NONHSAT172608.1	92.22	90	6	1	677	765	1619	1708	3e-24	115
XLOC_001041	NONHSAT187988.1	84.62	91	14	0	284	374	2313	2223	9e-11	69.9
XLOC_001041	NONHSAT172608.1	92.22	90	6	1	425	513	1619	1708	2e-24	115
XLOC_001041	NONHSAT187988.1	84.27	89	14	0	44	132	2311	2223	7e-10	65.9
XLOC_001043	NONHSAT191014.1	91.6	131	11	0	559	689	340	470	1e-41	172
XLOC_001045	NONHSAT081013.2	84.54	97	9	2	1	95	1243	1151	5e-10	65.9
XLOC_001046	NONHSAT080958.2	89.51	162	15	2	173	334	844	685	6e-41	170
XLOC_001046	NONHSAT080958.2	89.51	162	15	2	173	334	844	685	6e-41	170
XLOC_001047	NONHSAT080950.2	92.84	1691	109	6	13	1693	1834	146	0	2323
XLOC_001047	NONHSAT080950.2	92.84	1691	109	6	13	1693	1834	146	0	2323
XLOC_001047	NONHSAT080950.2	92.84	1691	109	6	13	1693	1834	146	0	2323
XLOC_001047	NONHSAT080950.2	92.84	1691	109	6	13	1693	1834	146	0	2323
XLOC_001047	NONHSAT080950.2	92.84	1690	109	6	13	1692	1834	147	0	2321
XLOC_001047	NONHSAT080950.2	92.84	1691	109	6	13	1693	1834	146	0	2323
XLOC_001048	NONHSAT080912.2	93.68	585	33	3	1	581	665	81	0	844
XLOC_001049	NONHSAT171024.1	93.33	45	3	0	83	127	9838	9882	1e-09	65.9
XLOC_001050	NONHSAT080906.2	93.39	121	8	0	488	608	298	178	6e-43	176
XLOC_001050	NONHSAT080907.2	92.12	800	53	7	29	823	799	5	0	995
XLOC_001051	NONHSAT002201.2	88.89	108	10	1	352	457	5079	5186	2e-23	113
XLOC_001052	NONHSAT080870.2	89.91	466	46	1	136	601	420	884	2e-153	543
XLOC_001052	NONHSAT080870.2	88.49	799	73	6	1	785	242	1035	0	833
XLOC_001054	NONHSAT080846.2	85.78	654	63	2	133	756	3408	2755	6e-170	599
XLOC_001055	NONHSAT190584.1	90.23	348	33	1	15	361	2567	2220	5e-114	412
XLOC_001056	NONHSAT190582.1	95.45	198	9	0	1	198	562	365	2e-86	321
XLOC_001057	NONHSAT189144.1	90.51	158	14	1	222	379	3396	3240	7e-46	186
XLOC_001058	NONHSAT189145.1	94.03	268	16	0	1	268	721	454	1e-111	404
XLOC_001058	NONHSAT189145.1	94.03	268	16	0	1	268	721	454	2e-111	404
XLOC_001062	NONHSAT140498.2	90.8	87	8	0	356	442	1021	1107	9e-23	109
XLOC_001063	NONHSAT189939.1	94.29	35	2	0	156	190	836	870	8e-06	54
XLOC_001064	NONHSAT189120.1	93.76	1105	60	5	1	1103	1098	1	0	1570
XLOC_001065	NONHSAT189099.1	93.9	164	10	0	1	164	376	213	4e-64	246
XLOC_001066	NONHSAT189914.1	91.67	48	4	0	226	273	2	49	3e-09	63.9
XLOC_001067	NONHSAT080661.2	92.15	242	13	3	139	376	577	338	1e-83	311
XLOC_001069	NONHSAT189911.1	95.63	252	11	0	57	308	99	350	3e-114	412
XLOC_001070	NONHSAT175148.1	92.86	42	3	0	1154	1195	1949	1990	2e-07	60
XLOC_001070	NONHSAT175148.1	92.5	40	3	0	1787	1826	1949	1988	4e-06	56
XLOC_001071	NONHSAT080613.2	100	156	0	0	60	215	468	313	3e-83	309
XLOC_001072	NONHSAT080542.2	92.42	462	34	1	1055	1515	1	462	8e-179	630
XLOC_001074	NONHSAT149289.1	100	26	0	0	96	121	3108	3083	2e-05	52
XLOC_001076	NONHSAT080492.2	93.63	377	20	2	174	547	411	36	5e-154	545
XLOC_001077	NONHSAT189855.1	97.33	75	2	0	1	75	440	514	9e-30	133
XLOC_001077	NONHSAT189855.1	97.33	75	2	0	1	75	440	514	1e-29	133
XLOC_001078	NONHSAT190493.1	94.2	500	27	1	1	498	810	311	0	755
XLOC_001080	NONHSAT080374.2	95.83	144	5	1	272	415	721	579	7e-59	230
XLOC_001080	NONHSAT080374.2	95.83	144	5	1	272	415	721	579	8e-59	230
XLOC_001081	NONHSAT188951.1	94.89	176	9	0	419	594	3098	2923	2e-73	278
XLOC_001082	NONHSAT188951.1	96.52	374	13	0	1	374	2236	1863	0	638
XLOC_001084	NONHSAT080367.2	97.62	42	1	0	101	142	255	214	7e-13	75.8
XLOC_001085	NONHSAT080280.2	91.32	242	13	3	175	410	240	1	4e-80	299
XLOC_001085	NONHSAT080281.2	92.58	485	28	3	234	712	483	1	0	662
XLOC_001085	NONHSAT080281.2	93.98	249	15	0	234	482	483	235	1e-102	375
XLOC_001086	NONHSAT164551.1	86.07	201	22	2	2	196	378	178	1e-40	168
XLOC_001087	NONHSAT080017.2	94.82	966	46	4	687	1649	2026	1062	0	1392
XLOC_001087	NONHSAT080017.2	95.19	831	36	4	687	1514	2026	1197	0	1203
XLOC_001087	NONHSAT080017.2	95.19	831	36	4	687	1514	2026	1197	0	1203
XLOC_001087	NONHSAT080017.2	95.19	831	36	4	687	1514	2026	1197	0	1203
XLOC_001087	NONHSAT176754.1	91	100	9	0	2	101	2864	2765	3e-28	127
XLOC_001088	NONHSAT189728.1	96.23	159	6	0	215	373	189	347	1e-70	268
XLOC_001089	NONHSAT186734.1	86.32	285	38	1	1296	1580	2916	2633	1e-53	214
XLOC_001089	NONHSAT186734.1	86.32	285	38	1	1296	1580	2916	2633	1e-53	214
XLOC_001089	NONHSAT188810.1	93.29	686	41	3	2578	3258	756	71	0	975
XLOC_001089	NONHSAT079957.2	92.06	189	15	0	1	189	245	57	6e-67	256
XLOC_001089	NONHSAT079957.2	92.06	189	15	0	1	189	245	57	1e-66	256
XLOC_001089	NONHSAT079957.2	92.06	189	15	0	1	189	245	57	2e-66	256
XLOC_001089	NONHSAT079957.2	92.06	189	15	0	1	189	245	57	2e-66	256
XLOC_001089	NONHSAT188810.1	92.35	340	25	1	658	997	3150	2812	6e-128	460
XLOC_001089	NONHSAT188810.1	92.35	340	25	1	569	908	3150	2812	6e-128	460
XLOC_001089	NONHSAT188810.1	92.35	340	25	1	414	753	3150	2812	8e-128	460
XLOC_001089	NONHSAT188810.1	92.35	340	25	1	331	670	3150	2812	4e-128	460
XLOC_001089	NONHSAT188810.1	100	52	0	0	1	52	748	697	3e-21	103
XLOC_001089	NONHSAT189720.1	92.23	103	8	0	1	103	1692	1794	2e-32	141
XLOC_001090	NONHSAT190366.1	94.53	256	14	0	255	510	1657	1402	5e-109	396
XLOC_001091	NONHSAT056253.2	91.11	45	4	0	1077	1121	1034	990	1e-06	58
XLOC_001092	NONHSAT099405.2	96.43	28	1	0	616	643	264	237	0.0004	48.1
XLOC_001093	NONHSAT079900.2	92.89	394	28	0	1	394	624	231	9e-158	559
XLOC_001094	NONHSAT079858.2	93.05	561	22	4	1	551	1140	587	0	797
XLOC_001094	NONHSAT079856.2	92.7	1588	102	7	3	1587	4103	2527	0	2187
XLOC_001094	NONHSAT079856.2	92.7	1588	102	7	3	1587	4103	2527	0	2187
XLOC_001094	NONHSAT079856.2	92.7	1588	102	7	3	1587	4103	2527	0	2187
XLOC_001095	NONHSAT195627.1	90.91	44	4	0	78	121	462	419	2e-06	56
XLOC_001097	NONHSAT198399.1	92.31	39	3	0	1152	1190	4397	4359	2e-05	54
XLOC_001097	NONHSAT188780.1	96.52	230	8	0	1718	1947	230	1	2e-107	392
XLOC_001097	NONHSAT188780.1	98	150	3	0	1720	1869	150	1	1e-71	274
XLOC_001097	NONHSAT188780.1	94.23	1768	77	9	1	1757	2227	474	0	2573
XLOC_001097	NONHSAT188780.1	94.23	1768	77	9	1	1757	2227	474	0	2573
XLOC_001097	NONHSAT188780.1	94.23	1768	77	9	1	1757	2227	474	0	2573
XLOC_001098	NONHSAT150626.1	95.87	121	5	0	4946	5066	1884	2004	3e-49	200
XLOC_001098	NONHSAT160431.1	90.32	248	22	1	5694	5939	879	1126	1e-67	262
XLOC_001100	NONHSAT079645.2	96	75	3	0	178	252	349	423	1e-27	125
XLOC_001101	NONHSAT188709.1	97.08	308	9	0	67	374	650	343	2e-152	539
XLOC_001103	NONHSAT079594.2	90.68	322	18	3	1	322	546	237	1e-108	394
XLOC_001104	NONHSAT102897.2	100	23	0	0	248	270	1274	1252	0.0007	46.1
XLOC_001105	NONHSAT188682.1	97.73	44	1	0	205	248	86	43	4e-14	79.8
XLOC_001107	NONHSAT224142.1	89.55	335	34	1	97	431	5208	4875	5e-104	379
XLOC_001108	NONHSAT189181.1	95.79	190	8	0	106	295	602	413	3e-84	313
XLOC_001108	NONHSAT078054.2	95.81	191	8	0	106	296	847	657	8e-85	315
XLOC_001108	NONHSAT189181.1	94.57	92	5	0	256	347	414	323	4e-33	143
XLOC_001114	NONHSAT078138.2	95	300	14	1	1066	1364	346	47	2e-130	468
XLOC_001114	NONHSAT078138.2	94.97	179	8	1	745	922	270	92	1e-72	276
XLOC_001114	NONHSAT078138.2	93.33	120	8	0	745	864	270	151	4e-42	174
XLOC_001114	NONHSAT078138.2	93.33	120	8	0	745	864	270	151	3e-42	174
XLOC_001114	NONHSAT189207.1	93.33	165	11	0	866	1030	1388	1224	8e-62	240
XLOC_001114	NONHSAT190003.1	97.56	82	2	0	105	186	1432	1513	2e-34	147
XLOC_001114	NONHSAT189207.1	95.08	244	12	0	1	244	1486	1243	3e-107	389
XLOC_001115	NONHSAT210288.1	100	27	0	0	37	63	2096	2122	8e-06	54
XLOC_001117	NONHSAT179865.1	88.95	181	14	2	1	177	667	489	4e-48	192
XLOC_001122	NONHSAT189258.1	92.62	244	18	0	812	1055	477	234	3e-92	341
XLOC_001122	NONHSAT189255.1	92.65	245	18	0	812	1056	666	422	8e-93	343
XLOC_001123	NONHSAT189266.1	97.3	74	2	0	7	80	2666	2593	3e-29	131
XLOC_001124	NONHSAT189323.1	93.76	657	21	4	136	788	1331	691	0	952
XLOC_001124	NONHSAT189323.1	95.79	642	22	3	136	773	1331	691	0	1013
XLOC_001124	NONHSAT078579.2	95.28	254	9	1	69	319	288	35	2e-106	387
XLOC_001126	NONHSAT197067.1	100	23	0	0	214	236	448	426	0.0006	46.1
XLOC_001128	NONHSAT010125.2	88.57	70	8	0	623	692	310	379	2e-12	75.8
XLOC_001128	NONHSAT189372.1	90.91	121	10	1	576	695	653	533	4e-33	145
XLOC_001128	NONHSAT189372.1	91.59	214	17	1	576	788	653	440	4e-72	274
XLOC_001128	NONHSAT189372.1	90.36	280	24	2	64	342	810	533	3e-88	327
XLOC_001128	NONHSAT189372.1	91.59	214	17	1	295	507	653	440	5e-72	274
XLOC_001129	NONHSAT189376.1	95.18	83	4	0	832	914	1114	1032	1e-29	133
XLOC_001130	NONHSAT189376.1	93.1	869	53	4	5	872	865	3	0	1150
XLOC_001130	NONHSAT189376.1	93.1	870	53	4	5	873	865	2	0	1152
XLOC_001130	NONHSAT189376.1	93.09	868	53	4	5	871	865	4	0	1148
XLOC_001130	NONHSAT037613.2	88.12	101	10	1	197	295	824	924	6e-20	99.6
XLOC_001130	NONHSAT102741.2	84.09	220	26	3	341	560	2293	2503	1e-33	147
XLOC_001131	NONHSAT188493.1	93.79	161	6	1	74	234	86	242	5e-61	238
XLOC_001131	NONHSAT188493.1	93.79	161	6	1	74	234	86	242	8e-61	238
XLOC_001131	NONHSAT078753.2	92.23	283	22	0	2502	2784	390	108	1e-105	387
XLOC_001131	NONHSAT078753.2	92	350	28	0	2396	2745	390	41	3e-131	472
XLOC_001131	NONHSAT078753.2	92.14	318	25	0	880	1197	390	73	1e-119	432
XLOC_001134	NONHSAT189426.1	94.34	106	5	1	1	105	161	56	1e-36	155
XLOC_001135	NONHSAT078914.2	93.89	573	32	3	1	571	747	176	0	835
XLOC_001136	NONHSAT078941.2	90.38	852	51	5	657	1490	3048	2210	0	993
XLOC_001136	NONHSAT078941.2	90.38	852	51	5	657	1490	3048	2210	0	993
XLOC_001137	NONHSAT190166.1	98.53	408	6	0	1	408	176	583	0	761
XLOC_001139	NONHSAT189501.1	93.25	415	26	2	171	584	814	401	7e-166	585
XLOC_001140	NONHSAT189504.1	92.65	272	19	1	1	271	525	254	2e-102	373
XLOC_001141	NONHSAT189511.1	90.78	217	16	2	199	414	297	84	3e-68	260
XLOC_001141	NONHSAT189511.1	90.64	299	24	2	272	569	297	2	7e-98	359
XLOC_001143	NONHSAT079124.2	90.19	316	15	4	1	303	313	1	2e-102	373
XLOC_001146	NONHSAT133491.2	97.22	36	1	0	164	199	551	516	2e-09	63.9
XLOC_001147	NONHSAT220586.1	94.42	197	11	0	1795	1991	707	511	4e-80	303
XLOC_001147	NONHSAT220586.1	94.42	197	11	0	1795	1991	707	511	5e-80	303
XLOC_001147	NONHSAT220586.1	94.42	197	11	0	1795	1991	707	511	4e-80	303
XLOC_001147	NONHSAT220586.1	94.42	197	11	0	1795	1991	707	511	5e-80	303
XLOC_001148	NONHSAT146937.2	91.53	354	30	0	5	358	501	148	2e-129	464
XLOC_001148	NONHSAT081137.2	95.09	265	13	0	1	265	2537	2273	8e-117	422
XLOC_001149	NONHSAT193078.1	88.64	88	10	0	196	283	102	189	7e-19	95.6
XLOC_001150	NONHSAT211290.1	90.7	172	16	0	84	255	1242	1413	2e-54	214
XLOC_001151	NONHSAT083413.2	91.91	346	23	2	423	764	1728	1384	9e-126	454
XLOC_001152	NONHSAT072098.2	90.33	269	25	1	796	1064	817	550	2e-74	283
XLOC_001153	NONHSAT192638.1	91.61	775	62	3	4	776	774	1	0	997
XLOC_001154	NONHSAT123172.2	86.52	141	19	0	486	626	7470	7610	2e-28	129
XLOC_001155	NONHSAT193113.1	87.95	473	29	3	1	462	1112	1567	9e-144	511
XLOC_001155	NONHSAT193113.1	87.95	473	29	3	1	462	1112	1567	1e-143	511
XLOC_001155	NONHSAT088761.2	90.15	274	24	2	334	605	756	1028	1e-84	315
XLOC_001156	NONHSAT191967.1	89.4	283	21	2	441	722	502	228	2e-86	321
XLOC_001156	NONHSAT191967.1	92.7	178	12	1	15	191	648	471	8e-49	194
XLOC_001157	NONHSAT192044.1	84.17	240	37	1	1	240	2527	2289	2e-40	167
XLOC_001158	NONHSAT083645.2	89.03	547	46	5	254	787	229	774	2e-166	587
XLOC_001159	NONHSAT074481.2	83.09	136	18	2	2	137	1322	1192	2e-13	77.8
XLOC_001159	NONHSAT083566.2	89.5	562	48	5	448	1003	1802	1246	8e-176	618
XLOC_001159	NONHSAT083568.2	91.85	785	61	3	527	1310	992	210	0	1025
XLOC_001159	NONHSAT083569.2	90.21	521	43	4	448	962	728	210	2e-171	605
XLOC_001159	NONHSAT083746.2	94.12	34	2	0	158	191	99	66	1e-05	52
XLOC_001160	NONHSAT083572.2	91.54	130	9	2	656	783	2026	1897	6e-36	155
XLOC_001161	NONHSAT013132.2	89.55	201	20	1	4136	4335	1583	1783	2e-56	224
XLOC_001162	NONHSAT032237.2	85	200	27	2	1	197	944	745	2e-33	145
XLOC_001163	NONHSAT118885.2	89.41	255	25	2	1266	1520	1051	799	3e-72	276
XLOC_001163	NONHSAT118885.2	89.41	255	25	2	1266	1520	1051	799	3e-72	276
XLOC_001163	NONHSAT118885.2	89.41	255	25	2	1266	1520	1051	799	3e-72	276
XLOC_001163	NONHSAT212496.1	84.69	98	15	0	258	355	1637	1734	2e-12	75.8
XLOC_001164	NONHSAT192041.1	98.31	118	2	0	6	123	1952	1835	7e-56	218
XLOC_001165	NONHSAT192671.1	97.45	275	7	0	39	313	371	97	1e-137	490
XLOC_001166	NONHSAT203666.1	97.44	78	2	0	1	78	3660	3737	1e-31	139
XLOC_001166	NONHSAT203666.1	97.44	78	2	0	1	78	3660	3737	2e-31	139
XLOC_001167	NONHSAT219747.1	83.81	278	37	2	1	275	4042	3770	4e-47	190
XLOC_001168	NONHSAT083656.2	91.8	793	58	3	1	786	748	1540	0	1041
XLOC_001168	NONHSAT083656.2	91.8	793	58	3	1	786	748	1540	0	1041
XLOC_001168	NONHSAT083656.2	91.79	792	58	3	1	785	748	1539	0	1039
XLOC_001168	NONHSAT083656.2	91.8	793	58	3	1	786	748	1540	0	1041
XLOC_001168	NONHSAT083656.2	91.8	793	58	3	1	786	748	1540	0	1041
XLOC_001169	NONHSAT083293.2	89.1	743	59	5	3	731	1825	1091	0	825
XLOC_001170	NONHSAT083939.2	93.58	265	15	2	1	264	355	92	6e-103	375
XLOC_001171	NONHSAT192707.1	94.36	195	10	1	179	372	404	210	8e-78	291
XLOC_001172	NONHSAT083927.2	92.81	139	10	0	4	142	227	89	5e-49	196
XLOC_001172	NONHSAT209069.1	85.29	68	10	0	300	367	221	288	1e-06	56
XLOC_001172	NONHSAT084423.2	82.86	105	18	0	609	713	119	15	2e-09	65.9
XLOC_001172	NONHSAT084423.2	87.6	121	11	2	516	632	288	168	2e-22	109
XLOC_001172	NONHSAT084423.2	82.86	105	18	0	110	214	119	15	6e-10	65.9
XLOC_001172	NONHSAT159168.1	85.9	234	24	2	7	239	1220	1445	2e-39	165
XLOC_001173	NONHSAT192155.1	93.85	715	42	2	488	1200	3776	3062	0	999
XLOC_001174	NONHSAT172656.1	100	27	0	0	806	832	1886	1860	9e-06	54
XLOC_001176	NONHSAT056215.2	100	31	0	0	651	681	710	740	3e-08	61.9
XLOC_001177	NONHSAT186085.1	85.24	271	40	0	118	388	6111	5841	5e-56	220
XLOC_001179	NONHSAT084438.2	91.54	449	29	3	186	632	561	120	2e-163	577
XLOC_001179	NONHSAT084438.2	92.78	263	17	2	186	446	382	120	1e-96	355
XLOC_001179	NONHSAT084416.2	90.85	306	24	1	184	485	2001	2306	4e-105	383
XLOC_001179	NONHSAT084438.2	92.78	263	17	2	34	294	382	120	7e-97	355
XLOC_001179	NONHSAT084433.2	92.83	265	17	2	248	510	356	92	7e-98	359
XLOC_001179	NONHSAT084436.2	92.46	544	32	3	155	696	551	15	0	741
XLOC_001180	NONHSAT192767.1	91.25	80	7	0	227	306	272	193	6e-21	103
XLOC_001181	NONHSAT192768.1	94.76	248	12	1	57	303	3942	3695	2e-104	381
XLOC_001182	NONHSAT084580.2	89.89	89	8	1	145	232	221	133	2e-19	97.6
XLOC_001183	NONHSAT084592.2	94.57	276	12	2	1	275	274	1	6e-115	414
XLOC_001185	NONHSAT192785.1	92.12	165	13	0	125	289	492	328	1e-57	224
XLOC_001186	NONHSAT084696.2	91.6	750	51	4	1	750	1128	391	0	971
XLOC_001188	NONHSAT084704.2	96.36	55	2	0	253	307	1319	1265	3e-18	93.7
XLOC_001189	NONHSAT118801.2	87.9	157	16	2	2	155	3362	3206	6e-34	147
XLOC_001190	NONHSAT084726.2	90.7	172	12	1	322	489	313	142	9e-54	212
XLOC_001192	NONHSAT084849.2	94.74	95	5	0	6	100	286	380	8e-35	149
XLOC_001193	NONHSAT200891.1	92.94	269	15	1	917	1181	1741	1473	7e-104	381
XLOC_001193	NONHSAT200891.1	92.94	269	15	1	917	1181	1741	1473	7e-104	381
XLOC_001194	NONHSAT171704.1	96.77	31	1	0	352	382	2123	2093	3e-06	54
XLOC_001195	NONHSAT084924.2	90.91	209	13	1	36	244	107	309	3e-70	266
XLOC_001196	NONHSAT084967.2	92.65	204	13	1	1	204	449	650	3e-74	280
XLOC_001197	NONHSAT059863.2	94	50	3	0	677	726	518	469	2e-12	75.8
XLOC_001198	NONHSAT192829.1	88.79	455	17	5	13	462	1594	1169	4e-145	515
XLOC_001198	NONHSAT192829.1	88.79	455	17	5	13	462	1594	1169	4e-145	515
XLOC_001199	NONHSAT193187.1	92.31	156	10	1	1	154	376	531	2e-52	208
XLOC_001199	NONHSAT193187.1	92.31	156	10	1	1	154	376	531	2e-52	208
XLOC_001199	NONHSAT193187.1	92.31	156	10	1	1	154	376	531	3e-52	208
XLOC_001199	NONHSAT193187.1	92.31	156	10	1	1	154	376	531	4e-52	208
XLOC_001199	NONHSAT085038.2	96.07	178	7	0	349	526	1223	1046	2e-79	297
XLOC_001199	NONHSAT085038.2	96.07	178	7	0	595	772	1223	1046	3e-79	297
XLOC_001200	NONHSAT223272.1	84.3	293	39	4	161	450	24846	25134	3e-47	190
XLOC_001200	NONHSAT223272.1	84.3	293	39	4	161	450	24846	25134	3e-47	190
XLOC_001201	NONHSAT125039.2	92.68	41	3	0	1	41	924	884	2e-07	58
XLOC_001202	NONHSAT085078.2	94.51	164	9	0	394	557	203	40	3e-66	254
XLOC_001203	NONHSAT123398.2	91.3	46	4	0	76	121	15010	15055	6e-08	60
XLOC_001205	NONHSAT192886.1	92.89	197	11	1	407	603	373	180	1e-72	276
XLOC_001206	NONHSAT193202.1	95.57	723	28	3	49	770	517	1236	0	1158
XLOC_001207	NONHSAT086592.2	91.36	660	53	2	1005	1660	556	1215	0	844
XLOC_001207	NONHSAT086592.2	91.36	660	53	2	1005	1660	556	1215	0	844
XLOC_001207	NONHSAT086592.2	91.36	660	53	2	1005	1660	556	1215	0	844
XLOC_001207	NONHSAT086592.2	91.36	660	53	2	1005	1660	556	1215	0	844
XLOC_001207	NONHSAT086592.2	91.36	660	53	2	1005	1660	556	1215	0	844
XLOC_001207	NONHSAT086592.2	91.36	660	53	2	1005	1660	556	1215	0	844
XLOC_001207	NONHSAT086592.2	91.36	660	53	2	1005	1660	556	1215	0	844
XLOC_001207	NONHSAT086592.2	91.36	660	53	2	1005	1660	556	1215	0	844
XLOC_001208	NONHSAT159343.1	100	26	0	0	1741	1766	427	452	7e-05	52
XLOC_001208	NONHSAT159343.1	100	26	0	0	428	453	427	452	2e-05	52
XLOC_001211	NONHSAT086629.2	94.92	433	17	2	867	1298	429	1	0	674
XLOC_001211	NONHSAT086629.2	94.92	433	17	2	596	1027	429	1	0	674
XLOC_001211	NONHSAT086629.2	94.92	433	17	2	590	1021	429	1	0	674
XLOC_001211	NONHSAT086629.2	94.92	433	17	2	846	1277	429	1	0	674
XLOC_001214	NONHSAT168677.1	90.91	99	9	0	42	140	62671	62769	4e-27	125
XLOC_001216	NONHSAT032140.2	95.08	264	12	1	2150	2413	385	123	2e-113	412
XLOC_001216	NONHSAT032140.2	95.02	261	12	1	2150	2410	385	126	1e-111	406
XLOC_001217	NONHSAT222539.1	89.87	227	21	2	758	984	777	1001	7e-65	252
XLOC_001217	NONHSAT222539.1	89.87	227	21	2	758	984	777	1001	6e-65	252
XLOC_001217	NONHSAT183265.1	91.64	287	23	1	1253	1539	2985	3270	1e-100	371
XLOC_001217	NONHSAT183265.1	91.64	287	23	1	1253	1539	2985	3270	1e-100	371
XLOC_001218	NONHSAT186427.1	86.81	235	29	2	2	234	5725	5959	1e-51	204
XLOC_001220	NONHSAT087048.2	97.15	281	8	0	219	499	316	36	2e-138	494
XLOC_001220	NONHSAT192947.1	94.63	615	32	1	405	1018	615	1	0	878
XLOC_001220	NONHSAT087047.2	96.83	379	12	0	219	597	699	321	0	656
XLOC_001220	NONHSAT192947.1	97.28	588	12	4	219	803	1107	521	0	965
XLOC_001220	NONHSAT192947.1	93.53	340	22	0	413	752	523	184	4e-140	500
XLOC_001221	NONHSAT087059.2	88.2	339	29	4	1	331	870	1205	2e-91	337
XLOC_001227	NONHSAT087180.2	100	25	0	0	326	350	28	4	5e-05	50.1
XLOC_001229	NONHSAT087310.2	96.83	284	8	1	133	415	611	328	1e-135	484
XLOC_001231	NONHSAT192516.1	91.28	321	20	1	1	321	1470	1782	1e-116	420
XLOC_001232	NONHSAT087375.2	90.83	349	23	2	40	379	99	447	3e-121	436
XLOC_001233	NONHSAT087379.2	88.61	913	68	6	92	969	950	39	0	997
XLOC_001234	NONHSAT127229.2	87.83	115	14	0	181	295	574	688	7e-25	117
XLOC_001236	NONHSAT192530.1	93.28	953	55	3	265	1217	1127	2070	0	1370
XLOC_001237	NONHSAT192530.1	96.55	29	1	0	6	34	2395	2423	5e-05	50.1
XLOC_001238	NONHSAT087394.2	91.52	1509	109	8	2256	3750	1754	251	0	1824
XLOC_001239	NONHSAT192303.1	89.09	55	6	0	63	117	21331	21277	9e-09	61.9
XLOC_001240	NONHSAT193032.1	88.62	325	36	1	565	888	390	66	7e-93	343
XLOC_001240	NONHSAT193032.1	88.62	325	36	1	565	888	390	66	9e-93	343
XLOC_001243	NONHSAT122447.2	90.08	121	12	0	638	758	3146	3026	2e-33	145
XLOC_001243	NONHSAT122447.2	89.68	126	13	0	603	728	3146	3021	8e-34	147
XLOC_002084	NONHSAT164330.1	98.41	63	1	0	5	67	1299	1361	3e-25	117
XLOC_002085	NONHSAT025395.2	93.12	1483	71	14	4585	6042	406	1882	0	1951
XLOC_002088	NONHSAT218906.1	93.91	115	7	0	39	153	1251	1365	9e-42	172
XLOC_002089	NONHSAT025510.2	91.62	191	14	2	235	424	190	1	2e-60	236
XLOC_002089	NONHSAT211366.1	91.67	48	4	0	371	418	358	311	1e-08	63.9
XLOC_002089	NONHSAT211366.1	91.67	48	4	0	336	383	358	311	9e-09	63.9
XLOC_002089	NONHSAT211366.1	91.67	48	4	0	515	562	358	311	1e-08	63.9
XLOC_002089	NONHSAT211366.1	91.67	48	4	0	349	396	358	311	1e-08	63.9
XLOC_002091	NONHSAT163210.1	91.61	429	34	2	42	470	1060	634	3e-155	549
XLOC_002095	NONHSAT161761.1	92.86	602	43	0	846	1447	3	604	0	852
XLOC_002095	NONHSAT161761.1	92.86	602	43	0	600	1201	3	604	0	852
XLOC_002095	NONHSAT161761.1	92.86	602	43	0	600	1201	3	604	0	852
XLOC_002095	NONHSAT025984.2	93.77	771	48	0	1272	2042	49	819	0	1148
XLOC_002095	NONHSAT025985.2	92.62	474	35	0	1602	2075	224	697	0	662
XLOC_002096	NONHSAT164357.1	97.73	88	2	0	1	88	1328	1415	6e-38	159
XLOC_002098	NONHSAT161781.1	98.75	80	1	0	194	273	54	133	2e-35	151
XLOC_002099	NONHSAT096018.2	90.59	510	34	3	918	1426	288	784	1e-178	628
XLOC_002099	NONHSAT096018.2	90.59	510	34	3	1574	2082	288	784	2e-178	628
XLOC_002100	NONHSAT026232.2	95.03	463	19	3	221	682	375	834	0	714
XLOC_002101	NONHSAT164384.1	93.85	179	11	0	414	592	18	196	2e-70	268
XLOC_002102	NONHSAT161835.1	92.19	64	5	0	1	64	790	853	1e-16	87.7
XLOC_002102	NONHSAT161835.1	89.04	228	16	1	61	279	936	1163	5e-69	262
XLOC_002103	NONHSAT193303.1	91.15	113	9	1	1	112	979	867	2e-31	137
XLOC_002104	NONHSAT164397.1	93.1	536	32	2	141	673	1348	1881	0	759
XLOC_002104	NONHSAT164397.1	93.1	536	32	2	110	642	1348	1881	0	759
XLOC_002104	NONHSAT164397.1	93.1	536	32	2	159	691	1348	1881	0	759
XLOC_002104	NONHSAT164397.1	93.1	536	32	2	360	892	1348	1881	0	759
XLOC_002104	NONHSAT164397.1	93.1	536	32	2	44	576	1348	1881	0	759
XLOC_002106	NONHSAT026925.2	91.39	1800	118	16	2	1771	12	1804	0	2010
XLOC_002107	NONHSAT026943.2	94.81	270	14	0	370	639	1	270	2e-117	424
XLOC_002108	NONHSAT158043.1	84.67	287	43	1	212	497	2928	2642	9e-54	212
XLOC_002110	NONHSAT163328.1	94.44	36	2	0	1	36	419	384	1e-06	56
XLOC_002112	NONHSAT156164.1	84.41	404	52	5	762	1159	996	598	1e-71	274
XLOC_002115	NONHSAT161896.1	94.93	611	18	5	1	610	422	1020	0	878
XLOC_002118	NONHSAT027209.2	94.17	240	13	1	216	454	5	244	2e-97	357
XLOC_002118	NONHSAT027209.2	94.17	240	13	1	262	500	5	244	2e-97	357
XLOC_002118	NONHSAT027209.2	94.17	240	13	1	265	503	5	244	2e-97	357
XLOC_002118	NONHSAT027208.2	98	150	3	0	344	493	487	636	5e-72	274
XLOC_002119	NONHSAT027212.2	92.5	80	6	0	50	129	352	431	1e-23	111
XLOC_002121	NONHSAT027296.2	95.58	317	13	1	4	319	96	412	2e-143	509
XLOC_002122	NONHSAT161961.1	96.92	325	9	1	136	460	145	468	1e-157	557
XLOC_002124	NONHSAT161985.1	95.58	181	8	0	58	238	751	931	3e-79	295
XLOC_002125	NONHSAT027420.2	96.55	87	3	0	366	452	110	196	6e-21	103
XLOC_002125	NONHSAT027420.2	96.55	87	3	0	366	452	110	196	7e-21	103
XLOC_002125	NONHSAT027424.2	93.08	679	42	5	488	1161	1	679	0	934
XLOC_002125	NONHSAT027424.2	93.08	679	42	5	466	1139	1	679	0	934
XLOC_002126	NONHSAT184745.1	91.67	84	7	0	528	611	169	86	3e-23	111
XLOC_002127	NONHSAT172183.1	85.71	217	28	1	1014	1227	3473	3689	7e-44	180
XLOC_002127	NONHSAT172183.1	85.71	217	28	1	519	732	3473	3689	4e-44	180
XLOC_002130	NONHSAT027691.2	93.91	197	11	1	72	267	370	566	1e-76	287
XLOC_002130	NONHSAT027691.2	92.28	298	21	1	2	297	60	357	8e-111	402
XLOC_002130	NONHSAT027691.2	91.7	253	16	2	1	248	314	566	6e-88	325
XLOC_002130	NONHSAT027691.2	93.91	197	11	1	215	410	370	566	2e-76	287
XLOC_002131	NONHSAT202475.1	91.41	454	36	2	147	600	9751	9301	2e-163	577
XLOC_002132	NONHSAT027707.2	92.8	250	13	2	40	284	1981	2230	2e-93	343
XLOC_002134	NONHSAT162070.1	94.82	309	10	2	144	446	21	329	8e-134	478
XLOC_002135	NONHSAT162071.1	95.68	139	6	0	1	139	5611	5749	6e-59	228
XLOC_002137	NONHSAT027771.2	93.03	1263	74	5	1802	3052	225	1485	0	1742
XLOC_002137	NONHSAT027771.2	93.03	1263	74	5	1817	3067	225	1485	0	1742
XLOC_002137	NONHSAT027771.2	93.03	1263	74	5	711	1961	225	1485	0	1742
XLOC_002137	NONHSAT027771.2	91.71	893	62	4	191	1073	225	1115	0	1126
XLOC_002137	NONHSAT125383.2	87.9	157	19	0	10	166	366	522	6e-38	161
XLOC_002138	NONHSAT027819.2	96.15	52	2	0	38	89	448	499	3e-16	87.7
XLOC_002139	NONHSAT200455.1	96.3	54	2	0	339	392	2549	2602	2e-17	91.7
XLOC_002142	NONHSAT027996.2	92.45	1047	65	7	165	1207	432	1468	0	1407
XLOC_002142	NONHSAT027996.2	92.45	1047	65	7	42	1084	432	1468	0	1407
XLOC_002142	NONHSAT027996.2	92.45	1047	65	7	463	1505	432	1468	0	1407
XLOC_002144	NONHSAT165123.1	90.2	51	5	0	308	358	4139	4189	1e-08	61.9
XLOC_002145	NONHSAT028083.2	97.41	116	3	0	60	175	1	116	5e-52	206
XLOC_002146	NONHSAT028116.2	95.35	129	6	0	1	129	573	701	7e-53	208
XLOC_002147	NONHSAT162175.1	90.83	109	8	1	100	206	274	382	2e-29	131
XLOC_002147	NONHSAT162175.1	90.65	107	8	1	68	172	274	380	4e-28	127
XLOC_002147	NONHSAT162175.1	90.83	109	8	1	79	185	274	382	2e-29	131
XLOC_002150	NONHSAT163534.1	97.66	171	4	0	507	677	433	263	4e-82	307
XLOC_002152	NONHSAT169584.1	92.91	282	19	1	3010	3290	1579	1298	1e-94	351
XLOC_002152	NONHSAT210789.1	96.67	30	1	0	3015	3044	9710	9739	0.0001	52
XLOC_002153	NONHSAT028299.2	92.95	156	11	0	683	838	1	156	2e-56	222
XLOC_002153	NONHSAT028299.2	92.95	156	11	0	515	670	1	156	2e-56	222
XLOC_002153	NONHSAT028299.2	92.95	156	11	0	401	556	1	156	1e-56	222
XLOC_002155	NONHSAT028330.2	92.67	232	11	1	1	232	262	487	2e-88	327
XLOC_002156	NONHSAT028350.2	92.08	240	15	1	74	313	105	340	6e-87	323
XLOC_002156	NONHSAT028350.2	92.12	241	15	1	286	526	104	340	2e-87	325
XLOC_002156	NONHSAT028350.2	92.08	240	15	1	66	305	105	340	6e-87	323
XLOC_002156	NONHSAT028350.2	92.12	241	15	1	9	249	104	340	1e-87	325
XLOC_002158	NONHSAT162231.1	94.94	1088	53	2	102	1188	2032	3118	0	1705
XLOC_002158	NONHSAT162231.1	94.94	1088	53	2	157	1243	2032	3118	0	1705
XLOC_002159	NONHSAT028580.2	88.25	570	44	4	566	1134	1	548	2e-155	551
XLOC_002159	NONHSAT028583.2	95.09	509	22	2	646	1153	1043	537	0	797
XLOC_002159	NONHSAT028583.2	95.47	397	15	2	111	506	931	537	1e-179	630
XLOC_002161	NONHSAT162241.1	94.35	248	14	0	165	412	132	379	3e-104	381
XLOC_002161	NONHSAT162241.1	93.77	385	18	2	211	595	1	379	1e-159	565
XLOC_002163	NONHSAT162246.1	95.92	147	6	0	52	198	89	235	5e-63	244
XLOC_002163	NONHSAT162246.1	95.92	147	6	0	133	279	89	235	5e-63	244
XLOC_002164	NONHSAT028698.2	93.36	422	21	3	1	420	132	548	3e-170	599
XLOC_002165	NONHSAT028699.2	93.58	483	28	2	1	480	1423	1905	0	698
XLOC_002166	NONHSAT054022.2	88.62	246	21	2	878	1117	6353	6109	9e-68	260
XLOC_002166	NONHSAT054022.2	88.62	246	21	2	713	952	6353	6109	8e-68	260
XLOC_002166	NONHSAT163602.1	94.81	751	31	3	842	1584	1872	1122	0	1166
XLOC_002167	NONHSAT163606.1	96.88	320	10	0	462	781	724	405	8e-157	555
XLOC_002169	NONHSAT168502.1	93.67	79	4	1	3	81	100	177	6e-23	109
XLOC_002171	NONHSAT028931.2	100	68	0	0	30	97	136	203	1e-30	135
XLOC_002173	NONHSAT029064.2	90	70	7	0	72	141	146	77	6e-15	83.8
XLOC_002173	NONHSAT174888.1	90.42	167	16	0	3	169	1102	1268	3e-51	204
XLOC_002175	NONHSAT029140.2	96.22	238	8	1	53	290	86	322	2e-108	392
XLOC_002176	NONHSAT029250.2	93.18	88	6	0	403	490	266	353	4e-28	127
XLOC_002177	NONHSAT029263.2	94.82	193	10	0	177	369	200	392	2e-81	303
XLOC_002181	NONHSAT027730.2	100	25	0	0	147	171	235	259	3e-05	50.1
XLOC_002183	NONHSAT029510.2	99.01	101	1	0	10	110	143	43	5e-47	192
XLOC_002184	NONHSAT029580.2	93.75	48	3	0	4	51	74	121	1e-11	71.9
XLOC_002185	NONHSAT162462.1	89.37	207	12	2	27	227	1	203	2e-60	236
XLOC_002186	NONHSAT029608.2	96.69	634	21	0	308	941	267	900	0	1090
XLOC_002186	NONHSAT029608.2	98.81	506	6	0	35	540	170	675	0	955
XLOC_002186	NONHSAT029608.2	96.7	637	21	0	45	681	264	900	0	1096
XLOC_002186	NONHSAT029608.2	96.69	634	21	0	123	756	267	900	0	1090
XLOC_002186	NONHSAT029608.2	96.68	633	21	0	72	704	268	900	0	1088
XLOC_002186	NONHSAT029608.2	96.69	634	21	0	105	738	267	900	0	1090
XLOC_002188	NONHSAT185710.1	82.29	175	31	0	40	214	734	908	1e-19	101
XLOC_002189	NONHSAT162467.1	92.91	141	6	1	306	442	76	216	1e-49	198
XLOC_002189	NONHSAT162467.1	92.91	141	6	1	237	373	76	216	9e-50	198
[truncated: 12,028 more rows]

## Sheet: Mouse
LncRNA	Mouse_LncRNA	Identity	Length	Mismatch	Gap	Q_start	Q_end	O_start	O_end	E-value	Score
XLOC_000002	NONMMUT092933.1	92.59	54	3	1	1420	1473	153	101	1e-09	67.9
XLOC_000002	NONMMUT092933.1	92.59	54	3	1	941	994	153	101	9e-10	67.9
XLOC_000002	NONMMUT092933.1	92.59	54	3	1	902	955	153	101	9e-10	67.9
XLOC_000002	NONMMUT092933.1	92.59	54	3	1	891	944	153	101	9e-10	67.9
XLOC_000008	NONMMUT041621.2	89.13	46	3	1	82	127	161	204	0.0004	46.1
XLOC_000009	NONMMUT121008.1	93.75	96	6	0	374	469	380	475	7e-33	143
XLOC_000013	NONMMUT068241.2	94.44	36	2	0	594	629	2379	2344	3e-06	56
XLOC_000015	NONMMUT087075.1	100	34	0	0	984	1017	70	37	1e-09	67.9
XLOC_000015	NONMMUT087075.1	100	34	0	0	1075	1108	70	37	1e-09	67.9
XLOC_000015	NONMMUT087075.1	100	34	0	0	957	990	70	37	1e-09	67.9
XLOC_000015	NONMMUT087075.1	100	34	0	0	1253	1286	70	37	1e-09	67.9
XLOC_000017	NONMMUT063034.2	91.3	46	4	0	797	842	2216	2171	2e-07	60
XLOC_000017	NONMMUT122916.1	97.5	40	1	0	1353	1392	2871	2910	1e-10	71.9
XLOC_000021	NONMMUT050856.2	89.02	173	19	0	270	442	307	479	8e-48	192
XLOC_000025	NONMMUT113458.1	81.32	257	48	0	5590	5846	793	537	1e-27	129
XLOC_000030	NONMMUT116030.1	90.75	281	26	0	505	785	281	1	6e-95	351
XLOC_000031	NONMMUT091716.1	91.53	59	4	1	207	265	1653	1596	2e-10	69.9
XLOC_000033	NONMMUT114317.1	100	27	0	0	1353	1379	757	731	2e-05	54
XLOC_000035	NONMMUT024060.2	93.75	32	2	0	1236	1267	792	761	0.0008	48.1
XLOC_000035	NONMMUT024060.2	93.75	32	2	0	1384	1415	792	761	0.0009	48.1
XLOC_000035	NONMMUT024060.2	93.75	32	2	0	1306	1337	792	761	0.0008	48.1
XLOC_000035	NONMMUT035303.2	96.43	28	1	0	75	102	1633	1606	0.0008	48.1
XLOC_000035	NONMMUT024060.2	93.75	32	2	0	777	808	792	761	0.0005	48.1
XLOC_000035	NONMMUT024060.2	93.75	32	2	0	716	747	792	761	0.0005	48.1
XLOC_000035	NONMMUT024060.2	93.75	32	2	0	748	779	792	761	0.0005	48.1
XLOC_000037	NONMMUT050607.2	89.15	378	26	3	620	996	774	1137	2e-117	424
XLOC_000039	NONMMUT002029.2	96.3	27	1	0	261	287	2680	2654	0.0008	46.1
XLOC_000039	NONMMUT002029.2	96.3	27	1	0	254	280	2680	2654	0.0008	46.1
XLOC_000039	NONMMUT002029.2	96.3	27	1	0	142	168	2680	2654	0.0005	46.1
XLOC_000039	NONMMUT002029.2	96.3	27	1	0	163	189	2680	2654	0.0006	46.1
XLOC_000039	NONMMUT002029.2	96.3	27	1	0	163	189	2680	2654	0.0006	46.1
XLOC_000039	NONMMUT002029.2	96.3	27	1	0	142	168	2680	2654	0.0005	46.1
XLOC_000045	NONMMUT047694.2	96.43	28	1	0	553	580	323	350	0.0004	48.1
XLOC_000045	NONMMUT047694.2	96.43	28	1	0	553	580	323	350	0.0004	48.1
XLOC_000045	NONMMUT047694.2	96.43	28	1	0	237	264	323	350	0.0002	48.1
XLOC_000045	NONMMUT006107.2	100	26	0	0	528	553	1751	1776	4e-05	52
XLOC_000045	NONMMUT006107.2	100	26	0	0	94	119	1751	1776	3e-05	52
XLOC_000045	NONMMUT006107.2	100	26	0	0	42	67	1751	1776	2e-05	52
XLOC_000046	NONMMUT122916.1	97.22	36	1	0	437	472	2908	2873	1e-08	63.9
XLOC_000048	NONMMUT115860.1	93.33	45	3	0	159	203	1738	1694	4e-10	65.9
XLOC_000052	NONMMUT104744.1	93.62	47	3	0	3065	3111	87	41	8e-10	69.9
XLOC_000053	NONMMUT129159.1	96.43	28	1	0	429	456	489	516	0.0002	48.1
XLOC_000057	NONMMUT111843.1	88.46	52	6	0	557	608	1314	1365	2e-06	56
XLOC_000057	NONMMUT111843.1	88.46	52	6	0	2002	2053	1314	1365	6e-06	56
XLOC_000058	NONMMUT015482.2	96.3	27	1	0	170	196	2199	2173	0.0005	46.1
XLOC_000060	NONMMUT104960.1	91.43	35	3	0	171	205	182	148	0.0004	46.1
XLOC_000061	NONMMUT070040.2	91.43	35	3	0	275	309	2102	2068	0.0007	46.1
XLOC_000062	NONMMUT098512.1	92.98	57	3	1	1180	1236	4114	4169	1e-11	73.8
XLOC_000067	NONMMUT068343.2	97.87	47	1	0	399	445	124	170	1e-15	85.7
XLOC_000068	NONMMUT014787.2	97.06	34	1	0	94	127	1941	1908	8e-08	60
XLOC_000071	NONMMUT122916.1	94.44	36	2	0	136	171	2873	2908	2e-06	56
XLOC_000072	NONMMUT117380.1	85.71	126	17	1	683	808	341	465	6e-19	99.6
XLOC_000073	NONMMUT080322.1	90.48	63	5	1	4048	4110	1069	1130	7e-10	69.9
XLOC_000073	NONMMUT118276.1	85.29	68	8	1	639	706	592	527	0.0001	50.1
XLOC_000073	NONMMUT118276.1	85.29	68	8	1	825	892	592	527	0.0001	50.1
XLOC_000073	NONMMUT118276.1	85.29	68	8	1	365	432	592	527	6e-05	50.1
XLOC_000073	NONMMUT118276.1	85.29	68	8	1	813	880	592	527	0.0002	50.1
XLOC_000075	NONMMUT057333.2	88	75	9	0	1	75	78	4	9e-13	77.8
XLOC_000077	NONMMUT070345.2	96.77	31	1	0	950	980	20	50	1e-05	54
XLOC_000078	NONMMUT087360.1	89.36	47	5	0	369	415	542	588	4e-06	54
XLOC_000078	NONMMUT087360.1	89.36	47	5	0	296	342	542	588	3e-06	54
XLOC_000082	NONMMUT070345.2	91.23	57	5	0	1041	1097	20	76	2e-11	73.8
XLOC_000089	NONMMUT021294.2	100	24	0	0	49	72	255	278	0.0004	48.1
XLOC_000089	NONMMUT021294.2	100	24	0	0	49	72	255	278	0.0003	48.1
XLOC_000089	NONMMUT122916.1	85.71	63	9	0	96	158	2846	2908	9e-06	54
XLOC_000094	NONMMUT070345.2	94.12	34	2	0	891	924	17	50	0.0001	52
XLOC_000094	NONMMUT070345.2	94.12	34	2	0	751	784	17	50	9e-05	52
XLOC_000094	NONMMUT070345.2	94.12	34	2	0	564	597	17	50	8e-05	52
XLOC_000101	NONMMUT136535.1	92.31	39	3	0	557	595	394	432	5e-06	54
XLOC_000104	NONMMUT070345.2	88.14	59	7	0	9	67	78	20	3e-08	61.9
XLOC_000104	NONMMUT070345.2	89.8	49	5	0	9	57	68	20	7e-07	58
XLOC_000104	NONMMUT064703.2	89.13	46	5	0	378	423	1428	1473	2e-05	52
XLOC_000112	NONMMUT048897.2	86.24	109	15	0	537	645	350	242	8e-19	97.6
XLOC_000112	NONMMUT048897.2	86.24	109	15	0	615	723	350	242	8e-19	97.6
XLOC_000112	NONMMUT048897.2	86.24	109	15	0	555	663	350	242	8e-19	97.6
XLOC_000112	NONMMUT048897.2	86.24	109	15	0	474	582	350	242	7e-19	97.6
XLOC_000112	NONMMUT048897.2	86.24	109	15	0	658	766	350	242	8e-19	97.6
XLOC_000117	NONMMUT048692.2	100	25	0	0	643	667	657	681	0.0002	50.1
XLOC_000117	NONMMUT048692.2	100	49	0	0	1	49	33	81	5e-19	97.6
XLOC_000117	NONMMUT048692.2	100	25	0	0	446	470	657	681	0.0001	50.1
XLOC_000118	NONMMUT117131.1	87.18	117	15	0	7	123	1	117	8e-24	113
XLOC_000120	NONMMUT136271.1	88.52	61	6	1	432	492	1526	1585	5e-07	58
XLOC_000121	NONMMUT036279.2	91.89	37	3	0	428	464	3414	3450	7e-05	50.1
XLOC_000122	NONMMUT128982.1	91.89	37	3	0	582	618	1579	1615	0.0002	50.1
XLOC_000122	NONMMUT128982.1	91.89	37	3	0	301	337	1579	1615	0.0001	50.1
XLOC_000126	NONMMUT067703.2	91.84	49	3	1	770	818	1528	1575	5e-07	58
XLOC_000129	NONMMUT070345.2	91.84	49	4	0	200	248	19	67	2e-09	65.9
XLOC_000145	NONMMUT114508.1	96.55	29	1	0	413	441	235	263	7e-05	50.1
XLOC_000148	NONMMUT107137.1	94.59	37	2	0	4263	4299	449	413	4e-06	58
XLOC_000148	NONMMUT014787.2	96.97	33	1	0	608	640	1940	1908	5e-07	58
XLOC_000148	NONMMUT014787.2	96.97	33	1	0	328	360	1940	1908	3e-07	58
XLOC_000148	NONMMUT107137.1	94.59	37	2	0	4287	4323	449	413	4e-06	58
XLOC_000158	NONMMUT127598.1	92.31	39	3	0	364	402	618	656	4e-06	54
XLOC_000158	NONMMUT127598.1	92.31	39	3	0	291	329	618	656	3e-06	54
XLOC_000158	NONMMUT127598.1	92.31	39	3	0	397	435	618	656	4e-06	54
XLOC_000161	NONMMUT107708.1	93.75	32	2	0	282	313	510	479	0.0002	48.1
XLOC_000166	NONMMUT106930.1	96.43	28	1	0	336	363	687	660	0.0003	48.1
XLOC_000166	NONMMUT104744.1	93.62	47	3	0	35	81	41	87	6e-11	69.9
XLOC_000167	NONMMUT114317.1	100	24	0	0	388	411	754	731	0.0003	48.1
XLOC_000169	NONMMUT002115.2	91.53	59	4	1	1980	2038	1801	1858	6e-10	69.9
XLOC_000169	NONMMUT002115.2	91.53	59	4	1	2012	2070	1801	1858	6e-10	69.9
XLOC_000177	NONMMUT113958.1	88.89	90	8	1	192	281	26	113	3e-18	93.7
XLOC_000177	NONMMUT045012.2	88.76	89	8	1	154	242	118	204	4e-17	91.7
XLOC_000177	NONMMUT113982.1	83.53	255	42	0	549	803	2758	3012	2e-41	172
XLOC_000177	NONMMUT113982.1	84.15	265	42	0	535	799	2758	3022	2e-47	192
XLOC_000177	NONMMUT113982.1	83.53	255	42	0	397	651	2758	3012	1e-41	172
XLOC_000177	NONMMUT113982.1	84.15	265	42	0	488	752	2758	3022	2e-47	192
XLOC_000177	NONMMUT113982.1	84.15	265	42	0	975	1239	2758	3022	2e-47	192
XLOC_000177	NONMMUT113982.1	83.53	255	42	0	962	1216	2758	3012	2e-41	172
XLOC_000181	NONMMUT083140.1	100	25	0	0	748	772	1459	1483	0.0001	50.1
XLOC_000185	NONMMUT036058.2	80.77	338	65	0	61	398	595	932	6e-24	113
XLOC_000185	NONMMUT036058.2	81.85	281	51	0	60	340	595	875	3e-23	111
XLOC_000186	NONMMUT071594.2	92.11	38	3	0	289	326	676	639	1e-05	52
XLOC_000187	NONMMUT104879.1	100	23	0	0	344	366	798	776	0.0008	46.1
XLOC_000190	NONMMUT073099.2	84.81	79	12	0	253	331	1	79	4e-08	61.9
XLOC_000193	NONMMUT015947.2	94.23	52	2	1	129	180	277	227	3e-11	71.9
XLOC_000195	NONMMUT033904.2	100	24	0	0	168	191	871	894	0.0003	48.1
XLOC_000199	NONMMUT044707.2	92.25	271	17	3	25	295	667	933	1e-94	349
XLOC_000205	NONMMUT032692.2	97.44	39	1	0	988	1026	19	57	3e-10	69.9
XLOC_000205	NONMMUT092933.1	91.67	60	4	1	383	442	93	151	9e-11	71.9
XLOC_000206	NONMMUT094109.1	94.44	36	2	0	198	233	3114	3149	1e-06	56
XLOC_000207	NONMMUT131734.1	89.47	57	5	1	127	183	13013	12958	7e-07	58
XLOC_000208	NONMMUT047488.2	96.97	33	1	0	253	285	56	88	2e-07	58
XLOC_000224	NONMMUT096553.1	92.11	38	3	0	394	431	408	371	6e-05	52
XLOC_000224	NONMMUT096553.1	92.11	38	3	0	281	318	408	371	5e-05	52
XLOC_000225	NONMMUT125574.1	91.67	36	3	0	755	790	380	345	0.0007	48.1
XLOC_000228	NONMMUT034034.2	84.38	64	10	0	40	103	196	259	0.0007	48.1
XLOC_000235	NONMMUT044213.2	90.96	177	8	3	3090	3262	2099	2271	3e-52	210
XLOC_000237	NONMMUT134600.1	96.3	27	1	0	18	44	169	195	0.0006	46.1
XLOC_000246	NONMMUT071230.2	91.67	36	3	0	187	222	634	669	0.0002	48.1
XLOC_000250	NONMMUT136271.1	97.37	38	1	0	1039	1076	1526	1563	7e-10	67.9
XLOC_000251	NONMMUT074763.2	92.31	52	3	1	955	1006	1770	1720	2e-08	63.9
XLOC_000254	NONMMUT070345.2	96.43	28	1	0	555	582	52	79	0.0004	48.1
XLOC_000254	NONMMUT070345.2	96.43	28	1	0	532	559	52	79	0.0004	48.1
XLOC_000254	NONMMUT070345.2	96.43	28	1	0	492	519	52	79	0.0004	48.1
XLOC_000254	NONMMUT098512.1	95.12	41	1	1	775	815	4124	4163	5e-07	58
XLOC_000257	NONMMUT004140.2	90.91	44	4	0	149	192	1977	1934	5e-07	56
XLOC_000259	NONMMUT033956.2	96.3	27	1	0	170	196	1155	1129	0.0008	46.1
XLOC_000265	NONMMUT135361.1	95.24	63	2	1	74	136	10	71	1e-17	93.7
XLOC_000269	NONMMUT122916.1	95	40	2	0	2510	2549	2871	2910	3e-08	63.9
XLOC_000269	NONMMUT122916.1	95	40	2	0	2448	2487	2871	2910	3e-08	63.9
XLOC_000269	NONMMUT122916.1	95	40	2	0	2445	2484	2871	2910	3e-08	63.9
XLOC_000269	NONMMUT122916.1	95	40	2	0	2607	2646	2871	2910	3e-08	63.9
XLOC_000276	NONMMUT077094.1	88.73	71	8	0	137	207	928	998	5e-13	77.8
XLOC_000288	NONMMUT077177.1	88.89	45	5	0	5	49	1362	1406	5e-05	50.1
XLOC_000289	NONMMUT070345.2	94.59	37	2	0	980	1016	21	57	7e-07	58
XLOC_000295	NONMMUT004502.2	96.67	60	2	0	8336	8395	536	595	9e-20	103
XLOC_000295	NONMMUT077187.1	85.06	154	20	2	820	973	1834	1984	3e-22	109
XLOC_000295	NONMMUT077187.1	85.06	154	20	2	753	906	1834	1984	2e-21	109
XLOC_000295	NONMMUT004497.2	93.81	113	7	0	570	682	27	139	6e-40	168
XLOC_000295	NONMMUT004497.2	93.81	113	7	0	544	656	27	139	3e-40	168
XLOC_000295	NONMMUT077187.1	85.06	154	20	2	1534	1687	1834	1984	2e-21	109
XLOC_000298	NONMMUT034784.2	96.43	28	1	0	155	182	1248	1221	0.0002	48.1
XLOC_000299	NONMMUT002596.2	93.39	121	8	0	66	186	83	203	5e-43	176
XLOC_000303	NONMMUT122916.1	95	40	2	0	2045	2084	2871	2910	3e-08	63.9
XLOC_000304	NONMMUT121578.1	94.87	39	2	0	1241	1279	698	660	5e-08	61.9
XLOC_000312	NONMMUT136296.1	92.16	51	3	1	44	94	1181	1230	2e-08	61.9
XLOC_000320	NONMMUT121578.1	91.11	45	4	0	25	69	660	704	3e-07	58
XLOC_000322	NONMMUT096553.1	92.5	40	2	1	614	653	399	361	0.0004	48.1
XLOC_000322	NONMMUT014505.2	88.24	68	7	1	736	803	6	72	1e-08	63.9
XLOC_000322	NONMMUT014505.2	88.24	68	7	1	611	678	6	72	1e-08	63.9
XLOC_000323	NONMMUT133052.1	91.84	49	4	0	778	826	99	51	4e-09	65.9
XLOC_000332	NONMMUT076567.1	84.85	297	25	4	383	678	1	278	2e-59	232
XLOC_000338	NONMMUT109564.1	86.96	69	8	1	310	378	324	391	2e-07	58
XLOC_000341	NONMMUT076603.1	96.83	63	2	0	8	70	23	85	1e-22	109
XLOC_000342	NONMMUT012722.2	85.88	85	12	0	390	474	1509	1593	3e-11	73.8
XLOC_000342	NONMMUT012722.2	85.88	85	12	0	390	474	1509	1593	3e-11	73.8
XLOC_000342	NONMMUT012722.2	85.54	83	12	0	569	651	1511	1593	3e-10	69.9
XLOC_000342	NONMMUT008164.2	100	28	0	0	882	909	2175	2148	2e-06	56
XLOC_000342	NONMMUT012722.2	85.54	83	12	0	503	585	1511	1593	5e-10	69.9
XLOC_000342	NONMMUT012722.2	85.54	83	12	0	542	624	1511	1593	3e-10	69.9
XLOC_000342	NONMMUT008164.2	100	28	0	0	1267	1294	2175	2148	3e-06	56
XLOC_000342	NONMMUT012722.2	85.54	83	12	0	499	581	1511	1593	5e-10	69.9
XLOC_000342	NONMMUT012722.2	86.05	86	12	0	435	520	1508	1593	5e-12	75.8
XLOC_000342	NONMMUT105294.1	100	24	0	0	350	373	2635	2658	0.0003	48.1
XLOC_000342	NONMMUT129066.1	94	50	2	1	1874	1923	136	88	1e-09	67.9
XLOC_000342	NONMMUT008164.2	100	28	0	0	609	636	2175	2148	1e-06	56
XLOC_000342	NONMMUT012722.2	85.54	83	12	0	213	295	1511	1593	5e-10	69.9
XLOC_000342	NONMMUT012722.2	85.54	83	12	0	210	292	1511	1593	5e-10	69.9
XLOC_000342	NONMMUT012722.2	85.54	83	12	0	524	606	1511	1593	3e-10	69.9
XLOC_000343	NONMMUT076626.1	81.89	127	22	1	5	130	253	379	7e-08	61.9
XLOC_000343	NONMMUT076626.1	81.89	127	22	1	5	130	253	379	4e-08	61.9
XLOC_000346	NONMMUT003637.2	92.21	629	35	7	1251	1873	306	926	0	644
XLOC_000350	NONMMUT037746.2	80.97	331	50	5	172	498	141	462	6e-30	133
XLOC_000350	NONMMUT037746.2	80.97	331	50	5	280	606	141	462	7e-30	133
XLOC_000362	NONMMUT111185.1	93.75	32	2	0	243	274	601	570	0.0002	48.1
XLOC_000366	NONMMUT060948.2	93.94	33	2	0	469	501	2178	2210	7e-05	50.1
XLOC_000367	NONMMUT063034.2	95.24	42	2	0	635	676	2212	2171	4e-10	67.9
XLOC_000367	NONMMUT063034.2	95.24	42	2	0	861	902	2212	2171	6e-10	67.9
XLOC_000367	NONMMUT063034.2	95.24	42	2	0	850	891	2212	2171	6e-10	67.9
XLOC_000367	NONMMUT063034.2	95.24	42	2	0	516	557	2212	2171	4e-10	67.9
XLOC_000367	NONMMUT063034.2	95.24	42	2	0	523	564	2212	2171	4e-10	67.9
XLOC_000367	NONMMUT063034.2	95.24	42	2	0	538	579	2212	2171	4e-10	67.9
XLOC_000369	NONMMUT003964.2	85.76	660	49	15	1	639	815	1450	2e-140	504
XLOC_000369	NONMMUT003964.2	85.15	633	49	15	1	612	842	1450	3e-124	450
XLOC_000371	NONMMUT096553.1	94.74	38	2	0	698	735	408	371	1e-07	60
XLOC_000371	NONMMUT096553.1	94.74	38	2	0	702	739	408	371	1e-07	60
XLOC_000372	NONMMUT076816.1	92.16	102	7	1	793	894	101	1	5e-29	131
XLOC_000372	NONMMUT076816.1	92.16	102	7	1	1211	1312	101	1	7e-29	131
XLOC_000372	NONMMUT076824.1	100	27	0	0	105	131	940	914	7e-06	54
XLOC_000372	NONMMUT076816.1	92.16	102	7	1	989	1090	101	1	6e-29	131
XLOC_000372	NONMMUT076824.1	100	27	0	0	81	107	940	914	1e-05	54
XLOC_000372	NONMMUT076824.1	100	27	0	0	50	76	940	914	4e-06	54
XLOC_000372	NONMMUT076816.1	92.16	102	7	1	574	675	101	1	4e-29	131
XLOC_000372	NONMMUT076816.1	92.16	102	7	1	726	827	101	1	4e-29	131
XLOC_000372	NONMMUT076816.1	92.16	102	7	1	420	521	101	1	3e-29	131
XLOC_000379	NONMMUT040707.2	94.12	34	2	0	154	187	1438	1405	2e-05	52
XLOC_000385	NONMMUT073444.2	83.87	93	15	0	401	493	512	604	4e-09	65.9
XLOC_000391	NONMMUT137054.1	100	24	0	0	297	320	661	684	0.0003	48.1
XLOC_000391	NONMMUT008099.2	100	28	0	0	307	334	2095	2068	8e-07	56
XLOC_000391	NONMMUT008099.2	100	28	0	0	256	283	2095	2068	7e-07	56
XLOC_000402	NONMMUT118236.1	90.91	44	4	0	516	559	301	258	3e-06	56
XLOC_000402	NONMMUT118236.1	90.91	44	4	0	516	559	301	258	4e-06	56
XLOC_000402	NONMMUT118236.1	90.91	44	4	0	369	412	301	258	4e-06	56
XLOC_000403	NONMMUT081531.1	93.18	44	2	1	28	71	228	186	1e-06	56
XLOC_000404	NONMMUT032208.2	97.5	40	0	1	1391	1430	1971	1933	4e-08	63.9
XLOC_000407	NONMMUT008099.2	100	28	0	0	21	48	2068	2095	5e-06	56
XLOC_000407	NONMMUT008099.2	100	28	0	0	21	48	2068	2095	5e-06	56
XLOC_000410	NONMMUT070345.2	94.59	37	2	0	72	108	21	57	2e-07	58
XLOC_000410	NONMMUT076433.1	94.12	34	2	0	580	613	540	507	0.0001	52
XLOC_000410	NONMMUT076433.1	94.12	34	2	0	580	613	540	507	0.0001	52
XLOC_000411	NONMMUT119579.1	94.74	38	2	0	661	698	34	71	1e-07	60
XLOC_000412	NONMMUT071907.2	90.48	42	4	0	710	751	355	314	4e-05	52
XLOC_000413	NONMMUT070345.2	92.98	57	4	0	3029	3085	57	1	2e-13	81.8
XLOC_000413	NONMMUT070345.2	92.98	57	4	0	3029	3085	57	1	2e-13	81.8
XLOC_000413	NONMMUT070345.2	92.98	57	4	0	3029	3085	57	1	2e-13	81.8
XLOC_000413	NONMMUT070345.2	92.98	57	4	0	3029	3085	57	1	2e-13	81.8
XLOC_000414	NONMMUT032420.2	93.33	45	3	0	982	1026	64	20	5e-09	65.9
XLOC_000414	NONMMUT032420.2	93.33	45	3	0	228	272	64	20	3e-09	65.9
XLOC_000418	NONMMUT055240.2	96.67	30	1	0	331	360	1421	1450	4e-05	52
XLOC_000418	NONMMUT055240.2	96.67	30	1	0	331	360	1421	1450	5e-05	52
XLOC_000418	NONMMUT055240.2	96.67	30	1	0	331	360	1421	1450	6e-05	52
XLOC_000418	NONMMUT055240.2	96.67	30	1	0	331	360	1421	1450	4e-05	52
XLOC_000418	NONMMUT057333.2	90.7	43	4	0	826	868	68	26	9e-06	54
XLOC_000419	NONMMUT070345.2	93.62	47	3	0	390	436	10	56	9e-11	69.9
XLOC_000420	NONMMUT040289.2	100	31	0	0	570	600	1216	1186	7e-08	61.9
XLOC_000421	NONMMUT070345.2	91.23	57	5	0	3011	3067	57	1	4e-11	73.8
XLOC_000421	NONMMUT070345.2	91.23	57	5	0	3011	3067	57	1	4e-11	73.8
XLOC_000421	NONMMUT070345.2	91.23	57	5	0	3011	3067	57	1	4e-11	73.8
XLOC_000421	NONMMUT070345.2	91.23	57	5	0	3011	3067	57	1	4e-11	73.8
XLOC_000421	NONMMUT070345.2	91.23	57	5	0	3011	3067	57	1	4e-11	73.8
XLOC_000422	NONMMUT050986.2	91.92	99	8	0	745	843	118	216	1e-29	133
XLOC_000422	NONMMUT050986.2	91.92	99	8	0	745	843	118	216	1e-29	133
XLOC_000422	NONMMUT050986.2	91.92	99	8	0	745	843	118	216	1e-29	133
XLOC_000422	NONMMUT050986.2	91.92	99	8	0	745	843	118	216	1e-29	133
XLOC_000424	NONMMUT014806.2	89.39	66	6	1	459	524	1333	1269	1e-09	67.9
XLOC_000425	NONMMUT050957.2	100	38	0	0	29	66	905	868	5e-13	75.8
XLOC_000433	NONMMUT073099.2	90.24	41	4	0	1644	1684	42	2	0.0003	50.1
XLOC_000433	NONMMUT073099.2	90.24	41	4	0	1311	1351	42	2	0.0003	50.1
XLOC_000433	NONMMUT073099.2	90.24	41	4	0	1296	1336	42	2	0.0003	50.1
XLOC_000433	NONMMUT073099.2	90.24	41	4	0	997	1037	42	2	0.0002	50.1
XLOC_000433	NONMMUT073099.2	90.24	41	4	0	1319	1359	42	2	0.0004	50.1
XLOC_000437	NONMMUT031934.2	80.6	134	25	1	707	839	2352	2485	5e-05	52
XLOC_000447	NONMMUT103030.1	100	30	0	0	712	741	1559	1588	1e-07	60
XLOC_000448	NONMMUT117714.1	87.36	87	9	2	334	420	2	86	6e-11	69.9
XLOC_000450	NONMMUT070345.2	89.66	58	6	0	474	531	67	10	3e-10	67.9
XLOC_000450	NONMMUT070345.2	89.66	58	6	0	1053	1110	67	10	7e-10	67.9
XLOC_000452	NONMMUT093047.1	95	40	1	1	482	521	1460	1422	1e-06	56
XLOC_000453	NONMMUT115889.1	90.82	98	7	1	410	507	1256	1161	6e-25	117
XLOC_000453	NONMMUT115889.1	90.82	98	7	1	562	659	1256	1161	6e-25	117
XLOC_000458	NONMMUT070345.2	89.58	48	5	0	60	107	10	57	9e-07	56
XLOC_000465	NONMMUT093149.1	94.44	36	2	0	86	121	1045	1080	1e-06	56
XLOC_000467	NONMMUT015482.2	100	25	0	0	1895	1919	2199	2175	0.0003	50.1
XLOC_000467	NONMMUT075505.1	97.06	34	1	0	3315	3348	670	637	5e-07	60
XLOC_000467	NONMMUT085049.1	92.11	38	3	0	231	268	620	583	2e-05	52
XLOC_000467	NONMMUT085049.1	92.11	38	3	0	231	268	620	583	4e-05	52
XLOC_000467	NONMMUT085049.1	92.11	38	3	0	231	268	620	583	4e-05	52
XLOC_000471	NONMMUT050200.2	93.09	188	11	2	420	606	428	242	6e-66	254
XLOC_000471	NONMMUT050200.2	93.09	188	11	2	420	606	428	242	1e-65	254
XLOC_000471	NONMMUT050200.2	93.09	188	11	2	420	606	428	242	2e-65	254
XLOC_000473	NONMMUT075971.1	100	25	0	0	2522	2546	669	693	0.0005	50.1
XLOC_000475	NONMMUT115781.1	86.81	91	10	1	287	377	1484	1396	2e-13	79.8
XLOC_000477	NONMMUT132715.1	92.16	51	3	1	291	341	1314	1363	8e-08	61.9
XLOC_000477	NONMMUT132715.1	92.16	51	3	1	291	341	1314	1363	9e-08	61.9
XLOC_000477	NONMMUT132715.1	92.16	51	3	1	291	341	1314	1363	1e-07	61.9
XLOC_000479	NONMMUT073008.2	88.1	84	10	0	128	211	248	165	5e-16	87.7
XLOC_000479	NONMMUT073008.2	88.1	84	10	0	128	211	248	165	5e-16	87.7
XLOC_000479	NONMMUT073008.2	89.33	75	8	0	128	202	248	174	2e-15	85.7
XLOC_000483	NONMMUT122916.1	96.88	32	1	0	615	646	2902	2871	4e-06	56
XLOC_000483	NONMMUT122916.1	96.88	32	1	0	615	646	2902	2871	4e-06	56
XLOC_000483	NONMMUT122916.1	96.88	32	1	0	615	646	2902	2871	4e-06	56
XLOC_000483	NONMMUT002115.2	90.32	62	5	1	366	427	1858	1798	8e-10	67.9
XLOC_000487	NONMMUT121578.1	97.37	38	1	0	128	165	672	709	8e-10	67.9
XLOC_000489	NONMMUT096229.1	100	26	0	0	20	45	297	322	3e-05	52
XLOC_000489	NONMMUT002115.2	88.68	53	6	0	154	206	1836	1784	1e-06	58
XLOC_000490	NONMMUT070345.2	91.38	58	4	1	1131	1187	67	10	1e-09	67.9
XLOC_000491	NONMMUT070345.2	91.04	67	6	0	419	485	67	1	3e-15	85.7
XLOC_000492	NONMMUT049901.2	87.79	131	15	1	1239	1369	1975	1846	4e-27	125
XLOC_000492	NONMMUT049901.2	87.79	131	15	1	1225	1355	1975	1846	4e-27	125
XLOC_000492	NONMMUT049901.2	87.5	96	11	1	1179	1273	1580	1485	8e-16	87.7
XLOC_000492	NONMMUT049901.2	87.79	131	15	1	1120	1250	1975	1846	6e-27	125
XLOC_000492	NONMMUT049901.2	91.6	119	9	1	816	934	2250	2133	4e-34	149
XLOC_000506	NONMMUT122916.1	97.37	38	1	0	421	458	2908	2871	4e-10	67.9
XLOC_000507	NONMMUT096026.1	96.43	28	1	0	130	157	325	352	0.0004	48.1
XLOC_000508	NONMMUT087075.1	100	24	0	0	265	288	68	45	0.0003	48.1
XLOC_000512	NONMMUT041507.2	86.57	67	9	0	186	252	2	68	2e-08	61.9
XLOC_000512	NONMMUT041507.2	86.57	67	9	0	186	252	2	68	3e-08	61.9
XLOC_000512	NONMMUT041507.2	86.57	67	9	0	186	252	2	68	4e-08	61.9
XLOC_000512	NONMMUT041507.2	86.57	67	9	0	186	252	2	68	4e-08	61.9
XLOC_000513	NONMMUT115937.1	96.3	27	1	0	163	189	3111	3085	0.0005	46.1
XLOC_000516	NONMMUT067703.2	91.07	56	4	1	3185	3240	1528	1582	3e-08	63.9
XLOC_000516	NONMMUT067703.2	91.07	56	4	1	3223	3278	1528	1582	3e-08	63.9
XLOC_000516	NONMMUT067703.2	91.07	56	4	1	2916	2971	1528	1582	3e-08	63.9
XLOC_000517	NONMMUT117230.1	87.27	55	7	0	1	55	2128	2182	3e-06	54
XLOC_000518	NONMMUT122916.1	87.3	63	8	0	1634	1696	2908	2846	9e-08	61.9
XLOC_000518	NONMMUT136448.1	91.67	36	3	0	299	334	1897	1932	0.0003	48.1
XLOC_000518	NONMMUT136448.1	91.67	36	3	0	299	334	1897	1932	0.0003	48.1
XLOC_000521	NONMMUT049228.2	91.07	168	13	2	48	213	2525	2358	4e-49	198
XLOC_000523	NONMMUT010039.2	95.35	43	2	0	4711	4753	1640	1682	7e-10	69.9
XLOC_000523	NONMMUT022385.2	100	28	0	0	1147	1174	2265	2238	9e-06	56
XLOC_000523	NONMMUT022385.2	100	28	0	0	1147	1174	2265	2238	9e-06	56
XLOC_000523	NONMMUT022385.2	100	28	0	0	1147	1174	2265	2238	9e-06	56
XLOC_000523	NONMMUT022385.2	100	28	0	0	1147	1174	2265	2238	9e-06	56
XLOC_000529	NONMMUT131181.1	94.12	34	2	0	98	131	4912	4945	3e-05	52
XLOC_000529	NONMMUT131181.1	94.12	34	2	0	98	131	4912	4945	5e-05	52
XLOC_000534	NONMMUT032692.2	90.7	43	4	0	14	56	299	341	1e-05	54
XLOC_000547	NONMMUT115385.1	85.86	99	12	1	1025	1121	190	92	2e-13	79.8
XLOC_000547	NONMMUT115385.1	85.42	192	24	3	1025	1214	190	1	1e-30	137
XLOC_000547	NONMMUT115385.1	85.42	192	24	3	1025	1214	190	1	2e-30	137
XLOC_000547	NONMMUT096553.1	88.33	60	6	1	19	78	350	408	3e-06	56
XLOC_000547	NONMMUT096553.1	88.33	60	6	1	19	78	350	408	1e-06	56
XLOC_000560	NONMMUT048223.2	90	70	7	0	16	85	739	670	2e-15	83.8
XLOC_000564	NONMMUT136448.1	94.44	36	2	0	859	894	1932	1897	6e-06	56
XLOC_000565	NONMMUT117056.1	96.72	122	4	0	120	241	134	13	1e-53	210
XLOC_000565	NONMMUT055409.2	94.55	55	3	0	1	55	13	67	5e-15	85.7
XLOC_000565	NONMMUT117056.1	95.45	132	6	0	1842	1973	132	1	8e-54	214
XLOC_000568	NONMMUT132737.1	97.14	35	1	0	75	109	467	501	3e-08	61.9
XLOC_000578	NONMMUT134386.1	88.52	61	6	1	873	933	1652	1593	1e-06	58
XLOC_000578	NONMMUT134386.1	88.52	61	6	1	873	933	1652	1593	1e-06	58
XLOC_000580	NONMMUT056729.2	91.89	37	3	0	96	132	1602	1638	3e-05	50.1
XLOC_000582	NONMMUT121507.1	100	23	0	0	4	26	661	683	0.0004	46.1
XLOC_000583	NONMMUT080322.1	87.3	63	7	1	41	103	1130	1069	4e-06	54
XLOC_000584	NONMMUT112355.1	88.33	60	5	1	681	738	101	42	4e-07	58
XLOC_000584	NONMMUT112355.1	88.33	60	5	1	705	762	101	42	4e-07	58
XLOC_000587	NONMMUT038529.2	92.5	40	2	1	741	780	1096	1058	0.0007	48.1
XLOC_000587	NONMMUT038529.2	92.5	40	2	1	741	780	1096	1058	0.0007	48.1
XLOC_000587	NONMMUT038529.2	92.5	40	2	1	741	780	1096	1058	0.0008	48.1
XLOC_000587	NONMMUT038529.2	92.5	40	2	1	741	780	1096	1058	0.0008	48.1
XLOC_000587	NONMMUT038529.2	92.5	40	2	1	741	780	1096	1058	0.0009	48.1
XLOC_000588	NONMMUT065286.2	92.5	40	3	0	1004	1043	725	686	7e-06	56
XLOC_000588	NONMMUT119509.1	92.86	42	3	0	3264	3305	498	539	5e-07	60
XLOC_000590	NONMMUT114312.1	88.46	78	9	0	335	412	596	673	7e-15	83.8
XLOC_000590	NONMMUT114312.1	88.46	78	9	0	335	412	596	673	8e-15	83.8
XLOC_000590	NONMMUT114312.1	88.46	78	9	0	335	412	596	673	8e-15	83.8
XLOC_000592	NONMMUT032692.2	93.1	58	4	0	53	110	67	10	1e-14	83.8
XLOC_000596	NONMMUT120957.1	96.67	30	1	0	179	208	1646	1617	2e-05	52
XLOC_000596	NONMMUT120957.1	96.67	30	1	0	179	208	1646	1617	2e-05	52
XLOC_000597	NONMMUT126111.1	93.94	33	2	0	416	448	615	583	7e-05	50.1
XLOC_000598	NONMMUT102103.1	88.89	63	6	1	680	742	748	687	5e-08	61.9
XLOC_000598	NONMMUT053545.2	92.76	221	15	1	93	312	623	403	2e-81	303
XLOC_000598	NONMMUT053545.2	92.76	221	15	1	682	901	623	403	5e-81	303
XLOC_000598	NONMMUT053545.2	92.76	221	15	1	3394	3613	623	403	2e-80	303
XLOC_000598	NONMMUT053545.2	92.79	222	15	1	3394	3614	623	402	5e-81	305
XLOC_000598	NONMMUT053545.2	92.79	222	15	1	3394	3614	623	402	5e-81	305
XLOC_000598	NONMMUT053545.2	92.76	221	15	1	3394	3613	623	403	2e-80	303
XLOC_000600	NONMMUT021972.2	86.27	284	39	0	1	284	284	1	2e-66	254
XLOC_000601	NONMMUT049804.2	94.59	37	2	0	419	455	1036	1000	3e-06	58
XLOC_000603	NONMMUT052494.2	94.29	35	2	0	770	804	651	617	8e-06	54
XLOC_000603	NONMMUT052494.2	94.29	35	2	0	978	1012	651	617	1e-05	54
XLOC_000603	NONMMUT052494.2	94.29	35	2	0	770	804	651	617	9e-06	54
XLOC_000603	NONMMUT052494.2	94.29	35	2	0	978	1012	651	617	1e-05	54
XLOC_000603	NONMMUT052494.2	94.29	35	2	0	767	801	651	617	1e-05	54
XLOC_000603	NONMMUT052494.2	94.29	35	2	0	229	263	651	617	7e-06	54
XLOC_000603	NONMMUT102064.1	90.16	61	5	1	21	81	687	746	1e-09	65.9
XLOC_000609	NONMMUT112022.1	85.59	111	14	1	3693	3801	2219	2109	2e-15	87.7
XLOC_000609	NONMMUT008416.2	94.44	36	2	0	602	637	2957	2992	9e-06	56
XLOC_000610	NONMMUT044947.2	86.94	490	55	5	35	520	485	1	5e-120	432
XLOC_000613	NONMMUT122641.1	100	24	0	0	240	263	2110	2087	0.0004	48.1
XLOC_000624	NONMMUT055409.2	96.43	28	1	0	667	694	55	28	0.0004	48.1
XLOC_000624	NONMMUT055409.2	94.29	35	2	0	755	789	55	21	9e-06	54
XLOC_000624	NONMMUT055409.2	94.29	35	2	0	353	387	55	21	4e-06	54
XLOC_000626	NONMMUT092856.1	96.97	33	1	0	607	639	3835	3867	4e-07	58
XLOC_000627	NONMMUT092856.1	90.32	62	6	0	3	64	3779	3840	5e-13	75.8
XLOC_000628	NONMMUT122823.1	85.71	56	8	0	16	71	774	719	0.0006	48.1
XLOC_000628	NONMMUT122823.1	85.71	56	8	0	16	71	774	719	0.0005	48.1
XLOC_000628	NONMMUT122823.1	85.71	56	8	0	16	71	774	719	0.0004	48.1
XLOC_000631	NONMMUT111908.1	92.31	39	3	0	320	358	242	204	4e-06	54
XLOC_000631	NONMMUT111908.1	93.94	33	2	0	879	911	242	210	0.0001	50.1
XLOC_000632	NONMMUT044694.2	87.09	333	35	1	4900	5224	1184	852	1e-76	291
XLOC_000634	NONMMUT032692.2	97.22	36	1	0	248	283	45	10	6e-09	63.9
XLOC_000636	NONMMUT070345.2	88.46	52	6	0	713	764	67	16	2e-06	56
XLOC_000636	NONMMUT070345.2	88.46	52	6	0	963	1014	67	16	2e-06	56
XLOC_000636	NONMMUT070345.2	88.46	52	6	0	696	747	67	16	2e-06	56
XLOC_000636	NONMMUT070345.2	88.46	52	6	0	712	763	67	16	2e-06	56
XLOC_000636	NONMMUT070345.2	88.46	52	6	0	1097	1148	67	16	3e-06	56
XLOC_000646	NONMMUT098512.1	95.35	43	1	1	5	47	4164	4123	2e-08	61.9
XLOC_000651	NONMMUT070345.2	100	32	0	0	307	338	50	19	3e-09	63.9
XLOC_000656	NONMMUT098512.1	92.31	52	3	1	5	56	4164	4114	2e-08	63.9
XLOC_000658	NONMMUT055409.2	91.04	67	6	0	386	452	67	1	4e-15	85.7
XLOC_000663	NONMMUT032493.2	100	25	0	0	4	28	1816	1840	4e-05	50.1
XLOC_000667	NONMMUT016749.2	93.94	33	2	0	77	109	632	664	7e-05	50.1
XLOC_000672	NONMMUT092738.1	93.55	31	2	0	20	50	812	842	0.0006	46.1
XLOC_000674	NONMMUT042155.2	94.12	34	2	0	524	557	1591	1624	2e-05	52
XLOC_000676	NONMMUT089171.1	97.22	36	1	0	589	624	97	62	3e-08	63.9
XLOC_000676	NONMMUT089171.1	97.22	36	1	0	589	624	97	62	3e-08	63.9
XLOC_000676	NONMMUT032692.2	97.3	37	1	0	2282	2318	47	11	1e-08	65.9
XLOC_000679	NONMMUT070345.2	89.55	67	7	0	792	858	67	1	1e-12	77.8
XLOC_000680	NONMMUT070345.2	91.23	57	5	0	498	554	79	23	1e-11	73.8
XLOC_000680	NONMMUT070345.2	91.23	57	5	0	498	554	79	23	2e-11	73.8
XLOC_000680	NONMMUT070345.2	91.23	57	5	0	498	554	79	23	2e-11	73.8
XLOC_000689	NONMMUT070345.2	88.06	67	8	0	68	134	67	1	1e-10	69.9
XLOC_000690	NONMMUT110714.1	100	25	0	0	209	233	1350	1374	0.0004	50.1
XLOC_000697	NONMMUT040289.2	97.62	42	1	0	659	700	1186	1227	4e-12	75.8
XLOC_000697	NONMMUT040289.2	97.62	42	1	0	659	700	1186	1227	4e-12	75.8
XLOC_000699	NONMMUT122069.1	92.68	41	2	1	145	185	293	332	8e-05	50.1
XLOC_000699	NONMMUT122069.1	92.68	41	2	1	145	185	293	332	8e-05	50.1
XLOC_000699	NONMMUT122069.1	92.68	41	2	1	145	185	293	332	0.0001	50.1
XLOC_000702	NONMMUT073099.2	93.48	46	3	0	291	336	46	1	9e-10	67.9
XLOC_000709	NONMMUT002711.2	85.71	133	19	0	474	606	1503	1371	7e-24	113
XLOC_000709	NONMMUT002711.2	85.71	133	19	0	256	388	1503	1371	1e-23	113
XLOC_000709	NONMMUT002711.2	85.71	133	19	0	256	388	1503	1371	1e-23	113
XLOC_000709	NONMMUT002711.2	85.71	133	19	0	256	388	1503	1371	2e-23	113
XLOC_000709	NONMMUT002711.2	85.71	133	19	0	256	388	1503	1371	2e-23	113
XLOC_000709	NONMMUT002711.2	92.98	57	4	0	352	408	1118	1062	9e-14	81.8
XLOC_000709	NONMMUT002714.2	87.22	180	21	1	3014	3193	760	583	7e-40	168
XLOC_000709	NONMMUT002711.2	85.71	133	19	0	256	388	1503	1371	5e-23	113
XLOC_000709	NONMMUT002714.2	86.71	173	21	1	2385	2557	753	583	1e-35	155
XLOC_000709	NONMMUT002714.2	86.71	173	21	1	2201	2373	753	583	1e-35	155
XLOC_000709	NONMMUT002714.2	86.71	173	21	1	1725	1897	753	583	1e-35	155
XLOC_000709	NONMMUT002714.2	86.71	173	21	1	1549	1721	753	583	1e-35	155
XLOC_000709	NONMMUT002714.2	87.22	180	21	1	2733	2912	760	583	9e-40	168
XLOC_000709	NONMMUT002714.2	86.71	173	21	1	1656	1828	753	583	1e-35	155
XLOC_000710	NONMMUT034977.2	96.67	30	1	0	744	773	1026	997	3e-05	52
XLOC_000711	NONMMUT055409.2	97.06	34	1	0	285	318	250	283	1e-07	60
XLOC_000711	NONMMUT055409.2	97.06	34	1	0	285	318	250	283	1e-07	60
XLOC_000712	NONMMUT002716.2	93.65	63	3	1	461	522	94	32	2e-15	85.7
XLOC_000716	NONMMUT015947.2	92.45	53	3	1	399	451	277	226	3e-09	65.9
XLOC_000716	NONMMUT015947.2	92.45	53	3	1	399	451	277	226	3e-09	65.9
XLOC_000717	NONMMUT078887.1	88.64	44	5	0	552	595	400	357	0.0006	48.1
XLOC_000717	NONMMUT078887.1	88.64	44	5	0	552	595	400	357	0.0005	48.1
XLOC_000719	NONMMUT078897.1	88.12	101	12	0	1	101	1293	1193	1e-21	105
XLOC_000722	NONMMUT121056.1	91.38	58	5	0	1077	1134	1078	1135	1e-11	75.8
XLOC_000725	NONMMUT112680.1	87.93	58	7	0	92	149	11219	11276	5e-08	60
XLOC_000727	NONMMUT104744.1	97.3	37	1	0	148	184	87	51	1e-09	65.9
XLOC_000729	NONMMUT078918.1	83.19	232	33	2	199	430	227	2	1e-32	143
XLOC_000734	NONMMUT076519.1	83.22	143	22	2	153	294	686	827	3e-13	77.8
XLOC_000735	NONMMUT003061.2	93.75	32	2	0	1262	1293	172	141	0.0007	48.1
XLOC_000735	NONMMUT003061.2	93.75	32	2	0	1401	1432	172	141	0.0008	48.1
XLOC_000735	NONMMUT003061.2	93.75	32	2	0	1221	1252	172	141	0.0007	48.1
XLOC_000744	NONMMUT066385.2	84.62	65	10	0	1	65	845	781	7e-05	50.1
XLOC_000744	NONMMUT066385.2	84.62	65	10	0	1	65	845	781	7e-05	50.1
XLOC_000746	NONMMUT127779.1	100	25	0	0	720	744	1593	1617	0.0001	50.1
XLOC_000749	NONMMUT126489.1	90	60	5	1	493	552	1820	1762	5e-09	63.9
XLOC_000755	NONMMUT003677.2	87.39	222	26	2	337	557	1003	783	6e-50	202
XLOC_000755	NONMMUT003677.2	87.39	222	26	2	337	557	1003	783	6e-50	202
XLOC_000759	NONMMUT003654.2	87.67	73	9	0	1295	1367	366	294	4e-11	73.8
XLOC_000766	NONMMUT118379.1	100	24	0	0	120	143	550	573	0.0004	48.1
XLOC_000766	NONMMUT118379.1	100	24	0	0	120	143	550	573	0.0004	48.1
XLOC_000768	NONMMUT106309.1	96.67	30	1	0	1310	1339	3884	3913	5e-05	52
XLOC_000769	NONMMUT076654.1	82.41	108	17	1	432	537	108	1	5e-07	58
XLOC_000769	NONMMUT076654.1	82.41	108	17	1	219	324	108	1	2e-07	58
XLOC_000769	NONMMUT076654.1	82.41	108	17	1	381	486	108	1	3e-07	58
XLOC_000773	NONMMUT014350.2	100	23	0	0	135	157	2111	2089	0.0008	46.1
XLOC_000777	NONMMUT129192.1	94.44	36	2	0	2056	2091	863	828	5e-06	56
XLOC_000780	NONMMUT076635.1	84.32	185	26	1	1	185	616	435	2e-30	133
XLOC_000787	NONMMUT003999.2	83.58	134	22	0	230	363	134	1	2e-17	91.7
XLOC_000794	NONMMUT112514.1	90.57	53	4	1	23	75	3693	3642	2e-07	58
XLOC_000796	NONMMUT095408.1	95	40	2	0	289	328	1728	1767	5e-09	63.9
XLOC_000796	NONMMUT095408.1	95	40	2	0	289	328	1728	1767	5e-09	63.9
XLOC_000797	NONMMUT087460.1	94.64	56	2	1	3033	3088	141	195	8e-13	79.8
XLOC_000797	NONMMUT087460.1	94.64	56	2	1	3033	3088	141	195	1e-12	79.8
XLOC_000801	NONMMUT016344.2	91.11	90	8	0	669	758	325	236	3e-24	115
XLOC_000801	NONMMUT016344.2	91.11	90	8	0	606	695	325	236	3e-24	115
XLOC_000801	NONMMUT016344.2	91.11	90	8	0	529	618	325	236	3e-24	115
XLOC_000802	NONMMUT122916.1	92.11	38	3	0	192	229	2908	2871	3e-05	52
XLOC_000804	NONMMUT126085.1	100	26	0	0	1305	1330	642	667	0.0001	52
XLOC_000805	NONMMUT040001.2	94.64	56	2	1	1930	1985	1990	2044	3e-13	79.8
XLOC_000806	NONMMUT111331.1	88.89	54	5	1	301	353	1596	1543	5e-05	52
XLOC_000806	NONMMUT111331.1	88.89	54	5	1	301	353	1596	1543	5e-05	52
XLOC_000806	NONMMUT111331.1	88.89	54	5	1	301	353	1596	1543	5e-05	52
XLOC_000806	NONMMUT111331.1	88.89	54	5	1	301	353	1596	1543	6e-05	52
XLOC_000807	NONMMUT104744.1	97.3	37	1	0	1776	1812	51	87	1e-08	65.9
XLOC_000808	NONMMUT124020.1	92.59	54	4	0	1950	2003	3286	3339	1e-11	75.8
XLOC_000810	NONMMUT129768.1	98.15	54	1	0	733	786	438	385	1e-19	99.6
XLOC_000813	NONMMUT032692.2	96.88	32	1	0	206	237	49	18	6e-07	56
XLOC_000818	NONMMUT070923.2	92.11	38	3	0	311	348	422	385	1e-05	52
XLOC_000822	NONMMUT099401.1	94.29	35	2	0	2452	2486	372	406	3e-05	54
XLOC_000825	NONMMUT117587.1	89.09	55	5	1	1	55	389	442	2e-05	54
XLOC_000826	NONMMUT041885.2	83.33	78	13	0	1718	1795	2242	2319	7e-05	52
XLOC_000830	NONMMUT068241.2	94.59	37	2	0	968	1004	2380	2344	7e-07	58
XLOC_000830	NONMMUT122916.1	94.59	37	2	0	2782	2818	2872	2908	2e-06	58
XLOC_000830	NONMMUT012524.2	100	31	0	0	301	331	1790	1760	1e-07	61.9
XLOC_000830	NONMMUT122916.1	94.59	37	2	0	1761	1797	2872	2908	2e-06	58
XLOC_000830	NONMMUT122916.1	94.59	37	2	0	980	1016	2872	2908	1e-06	58
XLOC_000831	NONMMUT034977.2	95.12	41	2	0	1585	1625	1023	983	4e-09	65.9
XLOC_000835	NONMMUT070345.2	91.67	48	4	0	1543	1590	20	67	2e-08	63.9
XLOC_000837	NONMMUT121578.1	92.31	39	3	0	90	128	699	661	1e-05	54
XLOC_000843	NONMMUT025071.2	88.64	44	5	0	868	911	2537	2580	0.001	48.1
XLOC_000844	NONMMUT041632.2	86.67	75	9	1	48	121	2	76	3e-08	61.9
XLOC_000858	NONMMUT070345.2	95.74	47	2	0	4032	4078	21	67	3e-12	77.8
XLOC_000858	NONMMUT070345.2	95.74	47	2	0	3555	3601	21	67	3e-12	77.8
XLOC_000858	NONMMUT070345.2	95.74	47	2	0	4371	4417	21	67	3e-12	77.8
XLOC_000858	NONMMUT070345.2	88.16	76	9	0	8231	8306	1	76	2e-12	79.8
XLOC_000858	NONMMUT122916.1	92.11	38	3	0	1414	1451	2908	2871	5e-05	52
XLOC_000858	NONMMUT004608.2	97.06	34	1	0	101	134	1636	1603	3e-07	60
XLOC_000859	NONMMUT108329.1	93.18	44	3	0	2682	2725	594	551	8e-08	63.9
XLOC_000868	NONMMUT123719.1	92.73	55	3	1	1479	1533	147	200	2e-10	69.9
XLOC_000870	NONMMUT051713.2	88	50	6	0	6	55	201	250	6e-05	52
XLOC_000879	NONMMUT040754.2	87.29	118	14	1	481	598	1316	1432	9e-22	107
XLOC_000880	NONMMUT040693.2	95.7	93	4	0	1180	1272	893	985	2e-35	153
XLOC_000880	NONMMUT040693.2	95.7	93	4	0	952	1044	893	985	1e-35	153
XLOC_000881	NONMMUT087839.1	92.19	64	4	1	391	454	695	633	2e-13	79.8
XLOC_000886	NONMMUT070345.2	93.1	58	4	0	1237	1294	10	67	2e-14	83.8
XLOC_000886	NONMMUT109982.1	93.06	72	5	0	54	125	60	131	2e-20	103
XLOC_000887	NONMMUT040526.2	95.45	176	3	4	1952	2124	117	290	4e-66	256
XLOC_000889	NONMMUT070345.2	92	50	4	0	987	1036	1	50	1e-09	67.9
XLOC_000890	NONMMUT063034.2	94.12	34	2	0	17	50	2171	2204	3e-05	52
XLOC_000890	NONMMUT063034.2	94.12	34	2	0	3	36	2171	2204	1e-05	52
XLOC_000890	NONMMUT104744.1	89.36	47	5	0	610	656	87	41	2e-05	54
XLOC_000893	NONMMUT070040.2	96.77	31	1	0	873	903	2102	2072	1e-05	54
XLOC_000893	NONMMUT070040.2	96.77	31	1	0	552	582	2102	2072	9e-06	54
XLOC_000893	NONMMUT102029.1	97.3	37	1	0	1538	1574	741	705	9e-09	65.9
XLOC_000893	NONMMUT102029.1	97.3	37	1	0	1773	1809	741	705	1e-08	65.9
XLOC_000893	NONMMUT102029.1	97.3	37	1	0	1694	1730	741	705	1e-08	65.9
XLOC_000893	NONMMUT102029.1	97.3	37	1	0	1689	1725	741	705	1e-08	65.9
XLOC_000893	NONMMUT102029.1	97.3	37	1	0	1381	1417	741	705	9e-09	65.9
XLOC_000893	NONMMUT102029.1	97.3	37	1	0	1648	1684	741	705	1e-08	65.9
XLOC_000893	NONMMUT102029.1	97.3	37	1	0	1550	1586	741	705	9e-09	65.9
XLOC_000893	NONMMUT102029.1	97.3	37	1	0	1632	1668	741	705	1e-08	65.9
XLOC_000893	NONMMUT102029.1	97.3	37	1	0	1622	1658	741	705	1e-08	65.9
XLOC_000893	NONMMUT102029.1	97.3	37	1	0	1527	1563	741	705	9e-09	65.9
XLOC_000893	NONMMUT102029.1	97.3	37	1	0	1531	1567	741	705	9e-09	65.9
XLOC_000893	NONMMUT102029.1	97.3	37	1	0	1161	1197	741	705	9e-09	65.9
XLOC_000893	NONMMUT102029.1	97.3	37	1	0	843	879	741	705	8e-09	65.9
XLOC_000895	NONMMUT115545.1	100	24	0	0	894	917	26	3	0.0006	48.1
XLOC_000895	NONMMUT115545.1	100	24	0	0	689	712	26	3	0.0005	48.1
XLOC_000900	NONMMUT070345.2	90.91	55	5	0	1125	1179	3	57	2e-10	69.9
XLOC_000900	NONMMUT070345.2	90.91	55	5	0	854	908	3	57	2e-10	69.9
XLOC_000904	NONMMUT021915.2	97.37	38	1	0	538	575	1062	1025	1e-09	67.9
XLOC_000907	NONMMUT108005.1	89.74	39	4	0	227	265	204	242	0.0006	46.1
XLOC_000913	NONMMUT040160.2	85.51	214	25	5	29	238	362	573	2e-32	141
XLOC_000916	NONMMUT114086.1	90.36	83	8	0	165	247	86	4	1e-20	101
XLOC_000917	NONMMUT089529.1	96.43	28	1	0	232	259	1083	1056	0.0004	48.1
XLOC_000917	NONMMUT089529.1	96.43	28	1	0	826	853	1083	1056	0.0008	48.1
XLOC_000917	NONMMUT089529.1	96.43	28	1	0	160	187	1083	1056	0.0005	48.1
XLOC_000917	NONMMUT089529.1	96.43	28	1	0	1140	1167	1083	1056	0.0009	48.1
XLOC_000921	NONMMUT032692.2	94.29	35	2	0	517	551	10	44	5e-06	54
XLOC_000922	NONMMUT108088.1	89.43	123	11	1	98	220	3299	3419	4e-30	135
XLOC_000922	NONMMUT108088.1	89.52	124	11	1	548	671	3298	3419	1e-30	137
XLOC_000922	NONMMUT108088.1	89.43	123	11	1	217	339	3299	3419	4e-30	135
XLOC_000922	NONMMUT108088.1	89.52	124	11	1	492	615	3298	3419	1e-30	137
XLOC_000922	NONMMUT108088.1	89.6	125	11	1	533	657	3297	3419	3e-31	139
XLOC_000922	NONMMUT108088.1	89.34	122	11	1	46	167	3300	3419	2e-29	133
XLOC_000926	NONMMUT087068.1	94.59	37	2	0	241	277	477	441	7e-07	58
XLOC_000926	NONMMUT087068.1	94.59	37	2	0	468	504	477	441	4e-07	58
XLOC_000936	NONMMUT008099.2	100	28	0	0	868	895	2095	2068	2e-06	56
XLOC_000936	NONMMUT008099.2	100	28	0	0	898	925	2095	2068	2e-06	56
XLOC_000936	NONMMUT008099.2	100	28	0	0	665	692	2095	2068	2e-06	56
XLOC_000936	NONMMUT109585.1	93.33	60	4	0	1175	1234	387	328	8e-16	87.7
XLOC_000936	NONMMUT008099.2	100	28	0	0	1709	1736	2095	2068	4e-06	56
XLOC_000938	NONMMUT058660.2	90.22	92	9	0	378	469	1603	1694	2e-23	111
XLOC_000939	NONMMUT036864.2	96.55	29	1	0	433	461	3615	3587	7e-05	50.1
XLOC_000939	NONMMUT036864.2	96.55	29	1	0	330	358	3615	3587	6e-05	50.1
XLOC_000941	NONMMUT055409.2	96.55	29	1	0	146	174	251	279	0.0002	50.1
XLOC_000941	NONMMUT055409.2	96.55	29	1	0	16	44	251	279	0.0001	50.1
XLOC_000944	NONMMUT071057.2	92.11	38	3	0	113	150	499	536	3e-05	52
XLOC_000944	NONMMUT071057.2	92.11	38	3	0	209	246	499	536	3e-05	52
XLOC_000945	NONMMUT101341.1	89.83	59	5	1	421	479	743	686	2e-08	61.9
XLOC_000947	NONMMUT131762.1	91.07	56	4	1	948	1003	258	312	1e-08	63.9
XLOC_000949	NONMMUT104539.1	92.68	41	3	0	258	298	228	268	2e-07	58
XLOC_000950	NONMMUT070345.2	91.53	59	5	0	776	834	78	20	8e-13	77.8
XLOC_000950	NONMMUT070345.2	91.53	59	5	0	981	1039	78	20	1e-12	77.8
XLOC_000951	NONMMUT034889.2	94.44	36	2	0	84	119	1844	1879	3e-06	56
XLOC_000958	NONMMUT026622.2	100	38	0	0	6675	6712	1209	1172	2e-11	75.8
XLOC_000960	NONMMUT026622.2	94.59	37	2	0	146	182	1208	1172	1e-07	58
XLOC_000962	NONMMUT032692.2	91.84	49	4	0	475	523	19	67	1e-09	65.9
XLOC_000964	NONMMUT045556.2	100	24	0	0	34	57	616	593	0.0003	48.1
XLOC_000965	NONMMUT135361.1	97.06	34	1	0	2	35	50	17	8e-08	60
XLOC_000969	NONMMUT053852.2	90.58	191	17	1	6700	6890	5724	5913	4e-57	228
XLOC_000969	NONMMUT053852.2	90.58	191	17	1	6832	7022	5724	5913	4e-57	228
XLOC_000969	NONMMUT053852.2	90.58	191	17	1	6623	6813	5724	5913	4e-57	228
XLOC_000970	NONMMUT030273.2	100	24	0	0	458	481	1949	1926	0.0003	48.1
XLOC_000971	NONMMUT072803.2	96.77	31	1	0	1225	1255	1190	1220	1e-05	54
XLOC_000974	NONMMUT118629.1	93.94	33	2	0	664	696	32	64	0.0001	50.1
XLOC_000977	NONMMUT130088.1	92	75	6	0	245	319	508	582	1e-20	101
XLOC_000977	NONMMUT130088.1	92	75	6	0	227	301	508	582	1e-20	101
XLOC_000977	NONMMUT130088.1	92	75	6	0	194	268	508	582	1e-20	101
XLOC_000977	NONMMUT130088.1	92	75	6	0	245	319	508	582	1e-20	101
XLOC_000977	NONMMUT130088.1	92	75	6	0	541	615	508	582	3e-20	101
XLOC_000989	NONMMUT092510.1	92.31	39	3	0	851	889	934	972	1e-05	54
XLOC_000990	NONMMUT070345.2	93.62	47	3	0	908	954	21	67	1e-10	69.9
XLOC_000990	NONMMUT070345.2	93.62	47	3	0	1109	1155	21	67	3e-10	69.9
XLOC_000991	NONMMUT024071.2	92.05	151	7	3	59	209	622	767	7e-46	184
XLOC_000992	NONMMUT063270.2	94.44	36	2	0	763	798	617	652	3e-06	56
XLOC_000992	NONMMUT096134.1	93.91	115	7	0	139	253	399	513	2e-41	172
XLOC_000992	NONMMUT063270.2	94.44	36	2	0	706	741	617	652	3e-06	56
XLOC_000992	NONMMUT015813.2	97.22	36	0	1	401	436	4413	4447	3e-06	56
XLOC_000992	NONMMUT015813.2	97.22	36	0	1	294	329	4413	4447	3e-06	56
XLOC_000994	NONMMUT125517.1	100	25	0	0	203	227	1083	1107	4e-05	50.1
XLOC_000994	NONMMUT008099.2	100	28	0	0	1	28	2068	2095	9e-07	56
XLOC_000994	NONMMUT125517.1	100	25	0	0	290	314	1083	1107	5e-05	50.1
XLOC_000995	NONMMUT070345.2	87.72	57	7	0	114	170	76	20	2e-07	58
XLOC_000996	NONMMUT057333.2	93.62	47	3	0	46	92	79	33	3e-10	69.9
XLOC_000996	NONMMUT121617.1	94.12	34	2	0	799	832	891	858	7e-05	52
XLOC_001001	NONMMUT070345.2	87.3	63	8	0	1210	1272	67	5	1e-07	61.9
XLOC_001001	NONMMUT070345.2	87.3	63	8	0	1588	1650	67	5	2e-07	61.9
XLOC_001003	NONMMUT070345.2	90.91	55	5	0	766	820	25	79	5e-10	69.9
XLOC_001004	NONMMUT057333.2	89.55	67	7	0	36	102	12	78	2e-13	77.8
XLOC_001005	NONMMUT124000.1	89.47	57	5	1	113	169	281	226	9e-07	58
XLOC_001006	NONMMUT024281.2	90.17	173	14	2	2197	2368	2700	2870	1e-47	194
XLOC_001008	NONMMUT066491.2	100	25	0	0	85	109	3187	3163	7e-05	50.1
XLOC_001017	NONMMUT011403.2	100	24	0	0	570	593	1358	1381	0.0004	48.1
XLOC_001017	NONMMUT011403.2	100	24	0	0	597	620	1358	1381	0.0004	48.1
XLOC_001021	NONMMUT129803.1	100	24	0	0	84	107	2212	2235	0.0006	48.1
XLOC_001021	NONMMUT129803.1	100	24	0	0	84	107	2212	2235	0.0008	48.1
XLOC_001021	NONMMUT129803.1	100	24	0	0	15	38	2212	2235	0.0009	48.1
XLOC_001021	NONMMUT129803.1	100	24	0	0	15	38	2212	2235	0.001	48.1
XLOC_001024	NONMMUT070345.2	97.37	38	1	0	294	331	20	57	7e-10	67.9
XLOC_001027	NONMMUT051389.2	100	28	0	0	1054	1081	473	446	4e-06	56
XLOC_001027	NONMMUT131284.1	96.43	28	1	0	22	49	442	415	0.0004	48.1
XLOC_001027	NONMMUT131284.1	96.43	28	1	0	22	49	442	415	0.0004	48.1
XLOC_001027	NONMMUT131284.1	96.43	28	1	0	22	49	442	415	0.0006	48.1
XLOC_001030	NONMMUT111185.1	96.88	32	1	0	232	263	601	570	2e-06	56
XLOC_001030	NONMMUT111185.1	96.88	32	1	0	333	364	601	570	3e-06	56
XLOC_001032	NONMMUT122916.1	88.89	63	7	0	1122	1184	2846	2908	2e-10	69.9
XLOC_001034	NONMMUT115475.1	92.86	42	3	0	1286	1327	659	700	3e-07	60
XLOC_001034	NONMMUT115475.1	92.86	42	3	0	1225	1266	659	700	3e-07	60
XLOC_001034	NONMMUT115475.1	92.86	42	3	0	991	1032	659	700	3e-07	60
XLOC_001034	NONMMUT115475.1	92.86	42	3	0	1937	1978	659	700	4e-07	60
XLOC_001034	NONMMUT115475.1	92.86	42	3	0	997	1038	659	700	3e-07	60
XLOC_001035	NONMMUT070345.2	90.67	75	7	0	1852	1926	2	76	3e-17	93.7
XLOC_001037	NONMMUT024626.2	92.39	92	7	0	34	125	391	482	2e-27	127
XLOC_001037	NONMMUT024626.2	90.35	114	11	0	4	117	369	482	1e-31	139
XLOC_001040	NONMMUT067179.2	92.31	39	3	0	62	100	22	60	3e-06	54
XLOC_001041	NONMMUT041957.2	90.45	178	11	3	334	510	175	3	4e-50	200
XLOC_001043	NONMMUT100994.1	90.74	54	4	1	630	683	78	130	1e-07	60
XLOC_001050	NONMMUT005547.2	96.88	32	1	0	182	213	1845	1876	2e-06	56
XLOC_001051	NONMMUT041885.2	100	25	0	0	992	1016	2112	2136	0.0002	50.1
XLOC_001066	NONMMUT076326.1	96.43	28	1	0	102	129	3086	3059	0.0001	48.1
XLOC_001072	NONMMUT088203.1	94.64	56	2	1	2761	2816	3652	3706	6e-13	79.8
XLOC_001073	NONMMUT072652.2	96.3	27	1	0	38	64	2991	3017	0.0007	46.1
XLOC_001079	NONMMUT041407.2	93.64	110	7	0	433	542	416	307	1e-38	163
XLOC_001080	NONMMUT025071.2	96.77	31	1	0	243	273	2539	2569	9e-06	54
XLOC_001080	NONMMUT025071.2	96.77	31	1	0	243	273	2539	2569	1e-05	54
XLOC_001085	NONMMUT015005.2	100	24	0	0	51	74	501	524	0.0002	48.1
XLOC_001085	NONMMUT032692.2	90.24	41	4	0	69	109	10	50	0.0001	50.1
XLOC_001085	NONMMUT032692.2	90.24	41	4	0	69	109	10	50	9e-05	50.1
XLOC_001087	NONMMUT136467.1	100	24	0	0	1	24	73	50	0.0002	48.1
XLOC_001088	NONMMUT041118.2	87.3	126	16	0	215	340	202	77	4e-27	123
XLOC_001089	NONMMUT055409.2	87.3	63	8	0	1375	1437	67	5	8e-08	61.9
XLOC_001089	NONMMUT055409.2	87.3	63	8	0	1375	1437	67	5	1e-07	61.9
XLOC_001089	NONMMUT055409.2	87.3	63	8	0	1375	1437	67	5	1e-07	61.9
XLOC_001089	NONMMUT041053.2	94.12	34	2	0	181	214	2378	2345	3e-05	52
XLOC_001089	NONMMUT006977.2	96.3	27	1	0	286	312	2507	2533	0.0007	46.1
XLOC_001090	NONMMUT122916.1	95	40	2	0	634	673	2910	2871	8e-09	63.9
XLOC_001094	NONMMUT072306.2	100	31	0	0	1492	1522	551	581	1e-07	61.9
XLOC_001094	NONMMUT072306.2	100	31	0	0	1492	1522	551	581	1e-07	61.9
XLOC_001094	NONMMUT072306.2	100	31	0	0	1492	1522	551	581	1e-07	61.9
XLOC_001097	NONMMUT108249.1	83.87	93	14	1	1811	1902	165	73	1e-06	58
XLOC_001097	NONMMUT108249.1	85.16	128	14	2	2107	2229	165	38	2e-17	93.7
XLOC_001097	NONMMUT108249.1	85.26	156	16	3	2029	2177	165	10	1e-22	111
XLOC_001098	NONMMUT040903.2	92.55	255	12	3	227	475	978	725	6e-77	291
XLOC_001098	NONMMUT040903.2	92.55	255	12	3	227	475	978	725	6e-77	291
XLOC_001098	NONMMUT040903.2	92.55	255	12	3	227	475	978	725	7e-77	291
XLOC_001098	NONMMUT040903.2	92.55	255	12	3	227	475	978	725	1e-76	291
XLOC_001098	NONMMUT040903.2	92.55	255	12	3	227	475	978	725	1e-76	291
XLOC_001098	NONMMUT040903.2	92.55	255	12	3	227	475	978	725	1e-76	291
XLOC_001098	NONMMUT040903.2	92.55	255	12	3	227	475	978	725	1e-76	291
XLOC_001100	NONMMUT119229.1	100	26	0	0	3	28	615	640	1e-05	52
XLOC_001114	NONMMUT011890.2	100	25	0	0	70	94	2891	2867	0.0002	50.1
XLOC_001117	NONMMUT132715.1	92	50	3	1	116	165	1314	1362	4e-08	60
XLOC_001128	NONMMUT071051.2	93.75	32	2	0	592	623	995	1026	0.0006	48.1
XLOC_001128	NONMMUT071051.2	93.75	32	2	0	592	623	995	1026	0.0004	48.1
XLOC_001128	NONMMUT071051.2	93.75	32	2	0	239	270	995	1026	0.0004	48.1
XLOC_001128	NONMMUT071051.2	93.75	32	2	0	311	342	995	1026	0.0005	48.1
XLOC_001130	NONMMUT121409.1	91.89	37	3	0	212	248	199	163	5e-05	50.1
XLOC_001130	NONMMUT121409.1	91.89	37	3	0	212	248	199	163	0.0002	50.1
XLOC_001131	NONMMUT031441.2	84.68	111	17	0	1853	1963	1772	1882	7e-15	85.7
XLOC_001131	NONMMUT031441.2	84.68	111	17	0	1853	1963	1772	1882	7e-15	85.7
XLOC_001131	NONMMUT031441.2	84.68	111	17	0	1853	1963	1772	1882	7e-15	85.7
XLOC_001131	NONMMUT109838.1	84.09	88	14	0	701	788	1896	1809	1e-08	63.9
XLOC_001147	NONMMUT095516.1	81.4	129	24	0	6375	6503	848	720	2e-08	65.9
XLOC_001147	NONMMUT095516.1	81.4	129	24	0	6375	6503	848	720	2e-08	65.9
XLOC_001147	NONMMUT095516.1	81.4	129	24	0	6375	6503	848	720	2e-08	65.9
XLOC_001147	NONMMUT095516.1	81.4	129	24	0	6375	6503	848	720	2e-08	65.9
XLOC_001150	NONMMUT053633.2	92.59	54	3	1	91	144	502	450	3e-10	67.9
XLOC_001151	NONMMUT020806.2	100	33	0	0	417	449	743	711	8e-09	65.9
XLOC_001152	NONMMUT135361.1	92.59	54	3	1	101	154	63	11	2e-09	67.9
XLOC_001154	NONMMUT131708.1	100	26	0	0	437	462	831	856	4e-05	52
XLOC_001155	NONMMUT065286.2	92.5	40	3	0	80	119	725	686	2e-06	56
XLOC_001155	NONMMUT065286.2	92.5	40	3	0	80	119	725	686	2e-06	56
XLOC_001155	NONMMUT124020.1	90	50	5	0	556	605	3339	3290	1e-07	60
XLOC_001159	NONMMUT069306.2	100	24	0	0	1723	1746	1063	1040	0.001	48.1
XLOC_001159	NONMMUT069306.2	100	24	0	0	1375	1398	1063	1040	0.0008	48.1
XLOC_001159	NONMMUT069306.2	100	24	0	0	294	317	1063	1040	0.0002	48.1
XLOC_001160	NONMMUT028199.2	90	40	4	0	1523	1562	1240	1201	0.0009	48.1
XLOC_001161	NONMMUT070345.2	87.67	73	9	0	4192	4264	76	4	5e-11	73.8
XLOC_001163	NONMMUT057333.2	91.11	45	4	0	1316	1360	67	23	1e-06	58
XLOC_001163	NONMMUT057333.2	91.11	45	4	0	1316	1360	67	23	1e-06	58
XLOC_001163	NONMMUT057333.2	91.11	45	4	0	1316	1360	67	23	1e-06	58
XLOC_001163	NONMMUT003886.2	94.59	37	2	0	260	296	1091	1055	4e-07	58
XLOC_001166	NONMMUT117587.1	88.33	60	6	1	13	72	384	442	1e-06	56
XLOC_001166	NONMMUT117587.1	88.33	60	6	1	13	72	384	442	2e-06	56
XLOC_001172	NONMMUT032692.2	94.87	39	2	0	124	162	17	55	2e-08	61.9
XLOC_001174	NONMMUT040370.2	90.48	42	4	0	797	838	3082	3123	4e-05	52
XLOC_001177	NONMMUT032692.2	92.86	56	4	0	596	651	66	11	1e-13	79.8
XLOC_001179	NONMMUT045346.2	93.75	32	2	0	44	75	2585	2554	0.0004	48.1
XLOC_001179	NONMMUT045346.2	93.75	32	2	0	44	75	2585	2554	0.0004	48.1
XLOC_001179	NONMMUT045346.2	93.75	32	2	0	44	75	2585	2554	0.0003	48.1
XLOC_001183	NONMMUT119149.1	98.7	77	1	0	210	286	82	6	9e-34	145
XLOC_001186	NONMMUT075505.1	97.06	34	1	0	550	583	637	670	1e-07	60
XLOC_001189	NONMMUT109656.1	100	28	0	0	16	43	514	487	2e-06	56
XLOC_001190	NONMMUT008367.2	87.32	71	7	1	322	390	390	320	5e-09	63.9
XLOC_001192	NONMMUT040514.2	87.64	89	11	0	8	96	300	388	6e-17	89.7
XLOC_001193	NONMMUT109441.1	90.38	52	4	1	1011	1062	431	481	5e-06	56
XLOC_001193	NONMMUT109441.1	90.38	52	4	1	1011	1062	431	481	5e-06	56
XLOC_001207	NONMMUT096139.1	97.87	94	2	0	8352	8445	1917	2010	5e-40	170
XLOC_001207	NONMMUT096139.1	97.87	94	2	0	8352	8445	1917	2010	5e-40	170
XLOC_001207	NONMMUT096139.1	97.87	94	2	0	8352	8445	1917	2010	5e-40	170
XLOC_001207	NONMMUT096139.1	97.87	94	2	0	8352	8445	1917	2010	5e-40	170
XLOC_001207	NONMMUT096139.1	97.87	94	2	0	8352	8445	1917	2010	5e-40	170
XLOC_001207	NONMMUT096139.1	97.87	94	2	0	8352	8445	1917	2010	5e-40	170
XLOC_001207	NONMMUT096139.1	97.89	95	2	0	8352	8446	1917	2011	1e-40	172
XLOC_001207	NONMMUT096139.1	97.87	94	2	0	8352	8445	1917	2010	5e-40	170
XLOC_001208	NONMMUT054524.2	100	25	0	0	1740	1764	151	175	0.0003	50.1
XLOC_001208	NONMMUT054524.2	100	25	0	0	427	451	151	175	9e-05	50.1
XLOC_001214	NONMMUT118555.1	92.73	55	3	1	83	137	911	858	2e-10	69.9
XLOC_001216	NONMMUT124394.1	87.69	260	31	1	2151	2410	551	809	1e-65	254
XLOC_001216	NONMMUT124394.1	87.69	260	31	1	2151	2410	551	809	1e-65	254
XLOC_001217	NONMMUT038061.2	96.88	32	1	0	799	830	173	142	7e-06	56
XLOC_001217	NONMMUT038061.2	96.88	32	1	0	799	830	173	142	7e-06	56
XLOC_001217	NONMMUT020266.2	90.48	63	6	0	575	637	67	5	3e-12	77.8
XLOC_001217	NONMMUT020266.2	90.48	63	6	0	575	637	67	5	2e-12	77.8
XLOC_001218	NONMMUT056062.2	100	26	0	0	78	103	256	281	1e-05	52
XLOC_001220	NONMMUT097469.1	90	160	13	1	219	375	269	110	5e-46	186
XLOC_001220	NONMMUT097469.1	90	160	13	1	219	375	269	110	1e-45	186
XLOC_001220	NONMMUT097469.1	90	160	13	1	219	375	269	110	7e-46	186
XLOC_001220	NONMMUT097470.1	89.55	201	14	2	221	414	435	235	1e-57	226
XLOC_001234	NONMMUT108128.1	96.97	33	1	0	184	216	279	311	5e-07	58
XLOC_001238	NONMMUT041326.2	97.3	37	1	0	2357	2393	256	292	1e-08	65.9
XLOC_001243	NONMMUT008099.2	96.55	29	1	0	22	50	2067	2095	0.0001	50.1
XLOC_001243	NONMMUT008099.2	96.55	29	1	0	22	50	2067	2095	0.0001	50.1
XLOC_002085	NONMMUT058611.2	82.02	406	44	11	4612	4995	1268	870	1e-33	149
XLOC_002088	NONMMUT070345.2	89.36	47	5	0	39	85	21	67	5e-06	54
XLOC_002090	NONMMUT058932.2	98.36	61	1	0	3287	3347	751	811	4e-23	113
XLOC_002099	NONMMUT102858.1	94.44	36	2	0	87	122	238	203	3e-06	56
XLOC_002103	NONMMUT129066.1	92.68	41	2	1	72	112	97	136	4e-05	50.1
XLOC_002106	NONMMUT135928.1	83.19	119	20	0	245	363	176	294	2e-12	77.8
XLOC_002107	NONMMUT073254.2	84.75	118	16	1	513	628	215	332	2e-15	85.7
XLOC_002108	NONMMUT015363.2	91.67	36	3	0	209	244	1670	1635	0.0003	48.1
XLOC_002113	NONMMUT124544.1	88.24	51	6	0	105	155	220	170	2e-06	54
XLOC_002117	NONMMUT059306.2	91.82	330	15	4	658	985	396	715	4e-105	385
XLOC_002117	NONMMUT059306.2	91.82	330	15	4	964	1291	396	715	5e-105	385
XLOC_002117	NONMMUT059306.2	91.82	330	15	4	604	931	396	715	4e-105	385
XLOC_002119	NONMMUT109091.1	100	26	0	0	197	222	1428	1403	7e-06	52
XLOC_002120	NONMMUT059351.2	93.18	44	3	0	1	44	245	288	1e-08	63.9
XLOC_002125	NONMMUT059525.2	91.24	194	17	0	565	758	412	219	1e-64	250
XLOC_002125	NONMMUT059525.2	91.24	194	17	0	543	736	412	219	1e-64	250
XLOC_002126	NONMMUT034977.2	97.22	36	1	0	554	589	1018	983	6e-09	63.9
XLOC_002131	NONMMUT126562.1	88.52	61	7	0	512	572	166	226	1e-09	65.9
XLOC_002132	NONMMUT049458.2	92.5	40	3	0	1	40	2068	2107	8e-07	56
XLOC_002136	NONMMUT097586.1	100	40	0	0	287	326	40	1	1e-13	79.8
XLOC_002137	NONMMUT040289.2	100	31	0	0	4517	4547	1216	1186	2e-07	61.9
XLOC_002137	NONMMUT040289.2	100	31	0	0	4532	4562	1216	1186	2e-07	61.9
XLOC_002137	NONMMUT040289.2	100	31	0	0	3426	3456	1216	1186	2e-07	61.9
XLOC_002137	NONMMUT040289.2	100	31	0	0	58	88	1216	1186	4e-08	61.9
XLOC_002144	NONMMUT096484.1	89.9	99	8	2	4	102	73	169	2e-20	101
XLOC_002145	NONMMUT005449.2	91.23	57	4	1	422	478	2265	2210	1e-09	65.9
XLOC_002152	NONMMUT070345.2	91.23	57	5	0	3145	3201	1	57	4e-11	73.8
XLOC_002153	NONMMUT097721.1	97.83	46	1	0	1000	1045	156	111	1e-14	83.8
XLOC_002153	NONMMUT097721.1	97.83	46	1	0	832	877	156	111	9e-15	83.8
XLOC_002153	NONMMUT097721.1	97.83	46	1	0	718	763	156	111	7e-15	83.8
XLOC_002155	NONMMUT096543.1	91.43	35	3	0	1	35	218	252	0.0008	46.1
XLOC_002159	NONMMUT070345.2	89.29	56	6	0	803	858	2	57	1e-08	63.9
XLOC_002159	NONMMUT070345.2	89.29	56	6	0	316	371	2	57	1e-08	63.9
XLOC_002165	NONMMUT129071.1	94.74	38	2	0	920	957	2601	2564	1e-07	60
XLOC_002166	NONMMUT002115.2	95	40	2	0	879	918	1797	1836	1e-08	63.9
XLOC_002166	NONMMUT002115.2	95	40	2	0	714	753	1797	1836	9e-09	63.9
XLOC_002166	NONMMUT081263.1	90	40	4	0	711	750	75	36	0.001	48.1
XLOC_002167	NONMMUT067206.2	92.11	38	3	0	23	60	636	673	3e-05	52
XLOC_002168	NONMMUT008138.2	90.7	43	4	0	122	164	617	659	4e-06	54
XLOC_002169	NONMMUT091854.1	94.59	37	2	0	44	80	208	244	2e-07	58
XLOC_002170	NONMMUT081246.1	85.78	232	26	2	123	354	225	1	5e-41	170
XLOC_002173	NONMMUT040289.2	100	30	0	0	4	33	1186	1215	1e-07	60
XLOC_002183	NONMMUT007413.2	86.54	260	30	2	2838	3092	1747	2006	9e-58	228
XLOC_002186	NONMMUT082614.1	86.1	295	40	1	427	720	182	476	2e-65	252
XLOC_002186	NONMMUT082614.1	85.91	291	40	1	251	540	182	472	4e-63	244
XLOC_002186	NONMMUT082614.1	86.1	295	40	1	167	460	182	476	1e-65	252
XLOC_002186	NONMMUT082614.1	86.1	295	40	1	242	535	182	476	1e-65	252
XLOC_002186	NONMMUT082614.1	86.1	295	40	1	190	483	182	476	1e-65	252
XLOC_002186	NONMMUT082614.1	86.1	295	40	1	224	517	182	476	1e-65	252
XLOC_002188	NONMMUT094265.1	92.11	38	3	0	2694	2731	258	295	0.0001	52
XLOC_002191	NONMMUT129066.1	93.88	49	2	1	623	671	96	143	2e-09	65.9
XLOC_002196	NONMMUT082548.1	87.76	98	12	0	757	854	157	254	2e-19	99.6
XLOC_002196	NONMMUT082548.1	87.76	98	12	0	655	752	157	254	1e-19	99.6
XLOC_002201	NONMMUT040289.2	93.48	46	3	0	660	705	1224	1179	4e-10	67.9
XLOC_002205	NONMMUT116229.1	92	50	3	1	1726	1775	857	809	3e-07	60
XLOC_002205	NONMMUT116229.1	92	50	3	1	1573	1622	857	809	3e-07	60
XLOC_002205	NONMMUT116229.1	92	50	3	1	1312	1361	857	809	3e-07	60
XLOC_002205	NONMMUT116229.1	92	50	3	1	1496	1545	857	809	3e-07	60
XLOC_002205	NONMMUT116229.1	92	50	3	1	1444	1493	857	809	3e-07	60
XLOC_002205	NONMMUT116229.1	92	50	3	1	1136	1185	857	809	3e-07	60
XLOC_002205	NONMMUT116229.1	92	50	3	1	1444	1493	857	809	3e-07	60
XLOC_002205	NONMMUT116229.1	92	50	3	1	1164	1213	857	809	3e-07	60
XLOC_002206	NONMMUT007133.2	92.98	114	2	3	990	1103	596	703	6e-33	145
XLOC_002214	NONMMUT053576.2	94.12	34	2	0	276	309	91	124	3e-05	52
XLOC_002214	NONMMUT011234.2	94.12	34	2	0	595	628	3067	3034	3e-05	52
XLOC_002216	NONMMUT101028.1	92.31	39	3	0	1811	1849	270	308	2e-05	54
XLOC_002220	NONMMUT136271.1	92	50	3	1	372	421	1584	1536	1e-07	60
XLOC_002220	NONMMUT136271.1	92	50	3	1	374	423	1584	1536	1e-07	60
XLOC_002224	NONMMUT006842.2	96.43	28	1	0	1	28	89	116	0.0007	48.1
XLOC_002225	NONMMUT082409.1	87.12	163	20	1	151	313	297	458	6e-35	149
XLOC_002225	NONMMUT006822.2	93.31	239	16	0	1022	1260	169	407	8e-94	347
XLOC_002225	NONMMUT006822.2	93.31	239	16	0	1033	1271	169	407	8e-94	347
XLOC_002225	NONMMUT006822.2	93.31	239	16	0	621	859	169	407	6e-94	347
XLOC_002226	NONMMUT070345.2	93.1	58	4	0	840	897	19	76	1e-14	83.8
XLOC_002230	NONMMUT135361.1	90.57	53	4	1	3290	3342	12	63	2e-06	58
XLOC_002230	NONMMUT135361.1	90.57	53	4	1	3238	3290	12	63	2e-06	58
XLOC_002232	NONMMUT129071.1	94.74	38	2	0	493	530	2601	2564	8e-08	60
XLOC_002233	NONMMUT006581.2	87.88	66	8	0	212	277	59	124	3e-10	67.9
XLOC_002233	NONMMUT006581.2	87.88	66	8	0	202	267	59	124	2e-10	67.9
XLOC_002233	NONMMUT006581.2	87.88	66	8	0	194	259	59	124	2e-10	67.9
XLOC_002234	NONMMUT086195.1	91.67	36	3	0	600	635	541	506	0.0005	48.1
XLOC_002236	NONMMUT006621.2	93.06	346	18	4	319	659	33	377	6e-130	468
XLOC_002240	NONMMUT127397.1	96.55	29	1	0	109	137	1361	1333	7e-05	50.1
XLOC_002244	NONMMUT070345.2	92.31	52	4	0	3257	3308	16	67	4e-10	71.9
XLOC_002244	NONMMUT097778.1	82.79	122	21	0	1036	1157	605	726	4e-12	75.8
XLOC_002246	NONMMUT043908.2	100	30	0	0	318	347	798	827	5e-08	60
XLOC_002250	NONMMUT097781.1	92.86	56	3	1	1173	1228	4258	4204	8e-11	71.9
XLOC_002258	NONMMUT025683.2	90.48	42	4	0	43	84	581	540	2e-05	52
XLOC_002259	NONMMUT069236.2	96.43	28	1	0	28	55	480	453	0.0001	48.1
XLOC_002261	NONMMUT121694.1	88.52	61	6	1	1045	1105	639	580	1e-06	58
XLOC_002263	NONMMUT104798.1	91.07	56	4	1	1757	1812	3320	3266	2e-08	63.9
XLOC_002266	NONMMUT063034.2	90.48	42	4	0	747	788	2171	2212	6e-05	52
XLOC_002268	NONMMUT070345.2	89.55	67	7	0	1090	1156	10	76	2e-12	77.8
XLOC_002272	NONMMUT093818.1	91.89	37	3	0	33	69	530	494	0.0004	50.1
XLOC_002272	NONMMUT055409.2	100	26	0	0	933	958	275	250	0.0001	52
XLOC_002272	NONMMUT055409.2	100	26	0	0	933	958	275	250	5e-05	52
XLOC_002276	NONMMUT122916.1	97.37	38	1	0	32	69	2871	2908	2e-10	67.9
XLOC_002277	NONMMUT102064.1	94.59	37	2	0	150	186	688	724	2e-07	58
XLOC_002280	NONMMUT136671.1	93.94	33	2	0	2009	2041	429	397	0.0003	50.1
XLOC_002281	NONMMUT011491.2	100	26	0	0	563	588	187	212	7e-05	52
XLOC_002282	NONMMUT119441.1	92.86	42	2	1	646	687	450	490	0.0001	52
XLOC_002282	NONMMUT119441.1	92.86	42	2	1	302	343	450	490	0.0001	52
XLOC_002286	NONMMUT063034.2	89.13	46	5	0	45	90	2171	2216	0.0001	52
XLOC_002286	NONMMUT063034.2	89.13	46	5	0	29	74	2171	2216	1e-05	52
XLOC_002286	NONMMUT063034.2	89.13	46	5	0	28	73	2171	2216	3e-05	52
XLOC_002286	NONMMUT063034.2	89.13	46	5	0	25	70	2171	2216	0.0001	52
XLOC_002289	NONMMUT003384.2	96.67	30	1	0	206	235	984	1013	2e-05	52
XLOC_002290	NONMMUT136448.1	100	28	0	0	19	46	1905	1932	2e-06	56
XLOC_002290	NONMMUT136448.1	92.68	41	3	0	3	43	1892	1932	6e-07	58
XLOC_002293	NONMMUT102064.1	90.32	62	5	1	1229	1290	687	747	2e-09	67.9
XLOC_002294	NONMMUT032692.2	94	50	3	0	422	471	19	68	3e-12	75.8
XLOC_002301	NONMMUT041957.2	100	23	0	0	215	237	1161	1183	0.0005	46.1
XLOC_002303	NONMMUT045362.2	96.67	30	1	0	353	382	1235	1264	4e-05	52
XLOC_002305	NONMMUT014466.2	94.29	35	2	0	829	863	256	290	1e-05	54
XLOC_002310	NONMMUT032692.2	97.56	41	1	0	445	485	50	10	2e-11	73.8
XLOC_002311	NONMMUT047919.2	86.27	102	13	1	26	126	393	292	2e-15	83.8
XLOC_002316	NONMMUT123047.1	90.24	41	4	0	4210	4250	426	386	0.0006	50.1
XLOC_002322	NONMMUT084060.1	100	25	0	0	3155	3179	1901	1925	0.0006	50.1
XLOC_002333	NONMMUT132412.1	91.67	36	3	0	809	844	376	341	0.0006	48.1
XLOC_002333	NONMMUT132412.1	91.67	36	3	0	809	844	376	341	0.0007	48.1
XLOC_002334	NONMMUT025915.2	91.07	56	4	1	1213	1268	1353	1407	2e-08	63.9
XLOC_002334	NONMMUT063034.2	90	40	4	0	674	713	2171	2210	0.0006	48.1
XLOC_002335	NONMMUT072341.2	92.73	55	4	0	342	396	106	160	2e-13	77.8
XLOC_002337	NONMMUT039064.2	92.31	52	3	1	173	224	1132	1182	4e-09	63.9
XLOC_002338	NONMMUT059043.2	81.51	119	22	0	23	141	516	398	2e-08	61.9
XLOC_002339	NONMMUT072458.2	80.56	180	35	0	95	274	9	188	2e-13	79.8
XLOC_002339	NONMMUT072458.2	80.56	180	35	0	95	274	9	188	4e-13	79.8
XLOC_002342	NONMMUT032692.2	92.16	51	4	0	5518	5568	60	10	1e-09	69.9
XLOC_002346	NONMMUT032420.2	89.06	64	7	0	586	649	64	1	2e-11	71.9
XLOC_002352	NONMMUT124530.1	93.97	199	8	2	371	569	1471	1277	9e-59	232
XLOC_002355	NONMMUT115931.1	100	24	0	0	700	723	196	173	0.0004	48.1
XLOC_002366	NONMMUT059465.2	100	23	0	0	142	164	84	106	0.0006	46.1
XLOC_002369	NONMMUT077642.1	100	23	0	0	283	305	11	33	0.0007	46.1
XLOC_002373	NONMMUT129547.1	93.55	31	2	0	226	256	3806	3836	0.001	46.1
XLOC_002376	NONMMUT014761.2	100	24	0	0	46	69	539	516	0.0005	48.1
XLOC_002376	NONMMUT014761.2	100	24	0	0	46	69	539	516	0.0004	48.1
XLOC_002376	NONMMUT014761.2	100	24	0	0	46	69	539	516	0.0005	48.1
XLOC_002381	NONMMUT024927.2	98.97	97	1	0	568	664	1	97	3e-45	184
XLOC_002388	NONMMUT032692.2	96.88	32	1	0	3	34	50	19	2e-06	56
XLOC_002390	NONMMUT067179.2	91.67	48	4	0	69	116	118	165	2e-08	63.9
XLOC_002390	NONMMUT067179.2	91.67	48	4	0	69	116	118	165	2e-08	63.9
XLOC_002394	NONMMUT097752.1	98.59	71	1	0	568	638	625	555	7e-30	133
XLOC_002395	NONMMUT025160.2	94.74	76	4	0	178	253	984	909	1e-25	119
XLOC_002395	NONMMUT025160.2	94.74	76	4	0	186	261	984	909	1e-25	119
XLOC_002395	NONMMUT025160.2	94.81	77	4	0	409	485	985	909	5e-26	121
XLOC_002401	NONMMUT008186.2	92.55	94	7	0	943	1036	1377	1470	6e-29	131
XLOC_002401	NONMMUT008186.2	92.31	91	7	0	943	1033	1377	1467	4e-27	125
XLOC_002401	NONMMUT008186.2	92.47	93	7	0	466	558	1378	1470	1e-28	129
XLOC_002401	NONMMUT008186.2	92.22	90	7	0	466	555	1378	1467	1e-26	123
XLOC_002402	NONMMUT055409.2	93.94	33	2	0	1247	1279	283	251	0.0002	50.1
XLOC_002404	NONMMUT008156.2	96.77	31	1	0	57	87	907	877	1e-05	54
XLOC_002404	NONMMUT008156.2	96.77	31	1	0	57	87	907	877	2e-05	54
XLOC_002404	NONMMUT121578.1	100	29	0	0	1646	1674	682	710	1e-06	58
XLOC_002406	NONMMUT081250.1	92	50	4	0	470	519	50	1	3e-10	67.9
XLOC_002407	NONMMUT121578.1	94.87	39	2	0	18	56	698	660	2e-08	61.9
XLOC_002407	NONMMUT116019.1	87.93	58	6	1	188	245	609	665	3e-05	52
XLOC_002407	NONMMUT116019.1	87.93	58	6	1	188	245	609	665	3e-05	52
XLOC_002407	NONMMUT116019.1	87.93	58	6	1	188	245	609	665	3e-05	52
XLOC_002412	NONMMUT007991.2	86.63	202	24	3	109	307	4246	4045	1e-25	121
XLOC_002413	NONMMUT099538.1	92.21	77	6	0	1095	1171	1	77	6e-21	105
XLOC_002414	NONMMUT007991.2	82.67	300	48	3	940	1237	621	324	8e-38	161
XLOC_002428	NONMMUT032989.2	95.12	41	2	0	527	567	2520	2480	2e-09	65.9
XLOC_002436	NONMMUT055409.2	91.67	48	4	0	80	127	68	21	3e-08	63.9
XLOC_002436	NONMMUT055409.2	91.67	48	4	0	80	127	68	21	3e-08	63.9
XLOC_002436	NONMMUT055409.2	91.67	48	4	0	80	127	68	21	4e-08	63.9
XLOC_002439	NONMMUT124055.1	94	100	6	0	1118	1217	141	42	8e-35	151
XLOC_002439	NONMMUT124055.1	94	100	6	0	1856	1955	141	42	1e-34	151
XLOC_002440	NONMMUT104960.1	90.91	44	4	0	28	71	139	182	6e-07	56
XLOC_002448	NONMMUT080725.1	89.23	65	7	0	1	65	160	96	3e-12	73.8
XLOC_002457	NONMMUT037017.2	88.37	43	5	0	98	140	376	334	0.0007	46.1
XLOC_002457	NONMMUT037017.2	88.37	43	5	0	98	140	376	334	0.0009	46.1
XLOC_002460	NONMMUT092933.1	88.33	60	6	1	134	193	93	151	2e-06	56
XLOC_002460	NONMMUT092933.1	88.33	60	6	1	134	193	93	151	2e-06	56
XLOC_002460	NONMMUT092933.1	88.33	60	6	1	134	193	93	151	2e-06	56
XLOC_002465	NONMMUT069582.2	97.06	34	1	0	1118	1151	2079	2046	2e-07	60
XLOC_002470	NONMMUT002573.2	86.89	61	7	1	223	282	2548	2488	9e-05	50.1
XLOC_002470	NONMMUT002573.2	86.89	61	7	1	223	282	2548	2488	9e-05	50.1
XLOC_002472	NONMMUT126111.1	91.67	36	3	0	1494	1529	616	581	0.001	48.1
XLOC_002476	NONMMUT053969.2	93.18	44	2	1	406	449	1016	974	1e-06	56
XLOC_002479	NONMMUT057333.2	91.07	56	5	0	510	565	22	77	5e-11	71.9
XLOC_002479	NONMMUT057333.2	91.07	56	5	0	510	565	22	77	5e-11	71.9
XLOC_002479	NONMMUT057333.2	91.07	56	5	0	510	565	22	77	5e-11	71.9
XLOC_002479	NONMMUT057333.2	91.07	56	5	0	510	565	22	77	5e-11	71.9
XLOC_002479	NONMMUT057333.2	91.07	56	5	0	510	565	22	77	6e-11	71.9
XLOC_002482	NONMMUT070345.2	85.94	64	9	0	671	734	79	16	5e-06	56
XLOC_002482	NONMMUT070345.2	85.94	64	9	0	671	734	79	16	4e-06	56
XLOC_002482	NONMMUT070345.2	85.94	64	9	0	671	734	79	16	4e-06	56
XLOC_002483	NONMMUT051389.2	94.44	36	2	0	58	93	446	481	1e-06	56
XLOC_002485	NONMMUT135114.1	85.71	84	11	1	1098	1180	698	781	1e-08	63.9
XLOC_002486	NONMMUT025071.2	85.71	63	9	0	489	551	2516	2578	8e-06	54
XLOC_002486	NONMMUT025071.2	85.71	63	9	0	640	702	2516	2578	1e-05	54
XLOC_002486	NONMMUT025071.2	85.71	63	9	0	614	676	2516	2578	1e-05	54
XLOC_002486	NONMMUT020578.2	100	23	0	0	12	34	2434	2456	0.0005	46.1
XLOC_002490	NONMMUT054196.2	90.2	51	5	0	124	174	907	857	1e-08	61.9
XLOC_002490	NONMMUT054196.2	90.2	51	5	0	87	137	907	857	1e-08	61.9
XLOC_002491	NONMMUT071377.2	92.86	42	3	0	358	399	421	462	1e-07	60
XLOC_002491	NONMMUT071377.2	92.86	42	3	0	358	399	421	462	1e-07	60
XLOC_002491	NONMMUT071377.2	92.86	42	3	0	358	399	421	462	2e-07	60
XLOC_002491	NONMMUT071377.2	92.86	42	3	0	358	399	421	462	2e-07	60
XLOC_002491	NONMMUT071377.2	92.86	42	3	0	358	399	421	462	2e-07	60
XLOC_002492	NONMMUT057333.2	89.66	58	6	0	1778	1835	10	67	2e-09	67.9
XLOC_002492	NONMMUT057333.2	89.66	58	6	0	1778	1835	10	67	3e-09	67.9
XLOC_002492	NONMMUT057333.2	89.66	58	6	0	1778	1835	10	67	3e-09	67.9
XLOC_002492	NONMMUT057333.2	89.66	58	6	0	1778	1835	10	67	3e-09	67.9
XLOC_002492	NONMMUT057333.2	89.66	58	6	0	1778	1835	10	67	3e-09	67.9
XLOC_002493	NONMMUT070345.2	88.68	53	6	0	4367	4419	23	75	3e-06	58
XLOC_002493	NONMMUT070345.2	88.68	53	6	0	4367	4419	23	75	3e-06	58
XLOC_002494	NONMMUT086543.1	90	60	5	1	140	199	519	461	4e-08	63.9
XLOC_002495	NONMMUT015947.2	91.43	35	3	0	357	391	226	260	0.0008	46.1
XLOC_002496	NONMMUT134386.1	92.45	53	3	1	906	958	1645	1594	2e-09	65.9
XLOC_002496	NONMMUT038424.2	96.97	33	1	0	970	1002	704	736	6e-07	58
XLOC_002496	NONMMUT108538.1	97.3	37	1	0	1105	1141	139	175	3e-09	65.9
XLOC_002496	NONMMUT108538.1	97.3	37	1	0	1085	1121	139	175	3e-09	65.9
XLOC_002500	NONMMUT119244.1	84.39	205	26	4	1478	1676	521	317	7e-27	125
XLOC_002500	NONMMUT119244.1	84.39	205	26	4	1478	1676	521	317	7e-27	125
XLOC_002501	NONMMUT128081.1	90.32	62	5	1	36	97	126	186	2e-10	67.9
XLOC_002504	NONMMUT119364.1	88.52	183	21	0	290	472	1675	1857	4e-49	196
XLOC_002504	NONMMUT119364.1	89.84	128	13	0	217	344	1675	1802	2e-35	151
XLOC_002505	NONMMUT119370.1	92.79	499	24	3	4922	5420	1869	2355	0	698
XLOC_002505	NONMMUT054408.2	91.25	617	42	7	4695	5307	869	261	0	708
XLOC_002505	NONMMUT054412.2	92.77	235	13	2	2575	2809	359	129	9e-73	278
XLOC_002505	NONMMUT119370.1	91.01	612	39	6	5797	6404	1869	2468	0	749
XLOC_002505	NONMMUT119370.1	91.01	612	39	6	2135	2742	1869	2468	0	749
XLOC_002505	NONMMUT054411.2	92.93	198	7	3	5648	5845	202	12	8e-69	266
XLOC_002505	NONMMUT054411.2	92.93	198	7	3	5845	6042	202	12	8e-69	266
XLOC_002505	NONMMUT119370.1	82.23	546	53	14	5039	5565	1292	1812	1e-67	262
XLOC_002505	NONMMUT119370.1	90.43	752	47	10	758	1499	1869	2605	0	844
XLOC_002507	NONMMUT033380.2	100	23	0	0	121	143	1210	1232	0.0004	46.1
XLOC_002510	NONMMUT132777.1	95.24	42	1	1	221	262	183	143	1e-07	60
XLOC_002511	NONMMUT057333.2	90	50	5	0	5	54	68	19	1e-07	60
XLOC_002524	NONMMUT131457.1	96.67	30	1	0	856	885	463	492	4e-05	52
XLOC_002524	NONMMUT032692.2	95.45	44	2	0	45	88	12	55	6e-11	71.9
XLOC_002524	NONMMUT032692.2	95.45	44	2	0	45	88	12	55	8e-11	71.9
XLOC_002529	NONMMUT119162.1	100	24	0	0	276	299	392	415	0.0003	48.1
XLOC_002537	NONMMUT098512.1	88.89	54	5	1	215	268	4115	4167	9e-06	52
XLOC_002539	NONMMUT080237.1	93.62	47	3	0	862	908	719	673	1e-10	69.9
XLOC_002546	NONMMUT037206.2	89.22	102	11	0	104	205	108	209	5e-25	115
XLOC_002546	NONMMUT037206.2	89.11	101	11	0	110	210	109	209	2e-24	113
XLOC_002548	NONMMUT037328.2	85.45	110	14	1	100	209	126	233	1e-15	85.7
XLOC_002550	NONMMUT098988.1	89.58	48	4	1	687	734	4694	4740	0.0004	48.1
XLOC_002550	NONMMUT098988.1	89.58	48	4	1	831	878	4694	4740	0.0005	48.1
XLOC_002550	NONMMUT098988.1	89.58	48	4	1	491	538	4694	4740	0.0003	48.1
XLOC_002550	NONMMUT098988.1	89.58	48	4	1	483	530	4694	4740	0.0003	48.1
XLOC_002557	NONMMUT136529.1	92	50	3	1	113	162	8782	8830	8e-08	60
XLOC_002558	NONMMUT095512.1	94.12	34	2	0	399	432	1342	1375	4e-05	52
XLOC_002559	NONMMUT055409.2	86.67	75	8	2	659	732	5	78	1e-05	54
XLOC_002562	NONMMUT107147.1	90.91	44	3	1	1	43	28	71	0.0003	48.1
XLOC_002562	NONMMUT107148.1	90.16	61	5	1	35	94	1287	1347	1e-09	65.9
XLOC_002564	NONMMUT037655.2	90.82	207	19	0	275	481	313	519	2e-67	260
XLOC_002567	NONMMUT037671.2	88.12	160	18	1	179	338	22	180	1e-37	159
XLOC_002567	NONMMUT037671.2	88.12	160	18	1	179	338	22	180	1e-37	159
XLOC_002567	NONMMUT037671.2	88.12	160	18	1	160	319	22	180	1e-37	159
XLOC_002567	NONMMUT037671.2	88.12	160	18	1	151	310	22	180	6e-37	159
XLOC_002567	NONMMUT037671.2	88.12	160	18	1	151	310	22	180	1e-37	159
XLOC_002567	NONMMUT107173.1	88.33	60	7	0	210	269	2	61	6e-09	63.9
XLOC_002568	NONMMUT037687.2	84.88	86	12	1	1668	1752	116	201	3e-07	60
XLOC_002572	NONMMUT037753.2	96.77	93	3	0	178	270	1614	1706	8e-38	161
XLOC_002572	NONMMUT037753.2	96.77	93	3	0	140	232	1614	1706	3e-38	161
XLOC_002574	NONMMUT109175.1	90	40	4	0	16	55	83	44	0.0001	48.1
XLOC_002575	NONMMUT104744.1	91.49	47	4	0	512	558	87	41	5e-08	61.9
XLOC_002578	NONMMUT107272.1	83.73	166	26	1	345	509	679	844	4e-22	107
XLOC_002581	NONMMUT107292.1	94.64	112	5	1	1	112	75	185	4e-40	167
XLOC_002584	NONMMUT037992.2	92.65	68	5	0	16	83	120	187	1e-18	95.6
XLOC_002586	NONMMUT107340.1	83.44	459	64	4	160	606	2833	3291	2e-67	258
XLOC_002586	NONMMUT107340.1	83.44	459	64	4	79	525	2833	3291	2e-67	258
XLOC_002586	NONMMUT107340.1	83.44	459	64	4	236	682	2833	3291	2e-67	258
XLOC_002589	NONMMUT038063.2	87.26	259	29	2	2044	2300	3382	3638	3e-61	240
XLOC_002591	NONMMUT107376.1	95.35	43	2	0	293	335	291	333	6e-11	69.9
XLOC_002607	NONMMUT125319.1	100	25	0	0	36	60	670	694	0.0002	50.1
XLOC_002608	NONMMUT070345.2	91.67	48	4	0	34	81	20	67	9e-09	63.9
XLOC_002611	NONMMUT075475.1	94.23	52	3	0	473	524	219	270	2e-13	79.8
XLOC_002612	NONMMUT000986.2	91.36	324	28	0	102	425	66	389	1e-115	420
XLOC_002614	NONMMUT121578.1	91.84	49	4	0	40	88	660	708	1e-09	65.9
XLOC_002628	NONMMUT076346.1	88.68	53	5	1	1720	1772	135	84	0.0003	50.1
XLOC_002632	NONMMUT075573.1	92.9	324	21	2	93	415	392	714	4e-123	444
XLOC_002637	NONMMUT001321.2	85.92	412	54	2	4009	4420	1136	729	7e-93	345
XLOC_002638	NONMMUT128317.1	100	23	0	0	192	214	1406	1384	0.0005	46.1
XLOC_002639	NONMMUT075630.1	84.78	289	33	4	151	438	5	283	1e-51	206
XLOC_002642	NONMMUT070345.2	90.57	53	5	0	2133	2185	5	57	2e-08	65.9
XLOC_002643	NONMMUT075662.1	100	40	0	0	284	323	5	44	1e-13	79.8
XLOC_002653	NONMMUT137560.1	100	25	0	0	436	460	502	478	7e-05	50.1
XLOC_002653	NONMMUT137560.1	100	25	0	0	522	546	502	478	9e-05	50.1
XLOC_002653	NONMMUT137560.1	100	25	0	0	428	452	502	478	7e-05	50.1
XLOC_002653	NONMMUT137560.1	100	25	0	0	202	226	502	478	4e-05	50.1
XLOC_002653	NONMMUT137560.1	100	25	0	0	256	280	502	478	5e-05	50.1
XLOC_002654	NONMMUT075786.1	97.5	40	1	0	61	100	1	40	2e-11	71.9
XLOC_002654	NONMMUT075786.1	97.5	40	1	0	51	90	1	40	2e-11	71.9
XLOC_002655	NONMMUT115335.1	96.55	29	1	0	151	179	797	769	7e-05	50.1
XLOC_002656	NONMMUT032692.2	91.38	58	5	0	515	572	10	67	3e-12	75.8
XLOC_002656	NONMMUT032692.2	91.38	58	5	0	606	663	10	67	3e-12	75.8
XLOC_002658	NONMMUT071047.2	96.43	28	1	0	1239	1266	1004	977	0.0007	48.1
XLOC_002658	NONMMUT071047.2	96.43	28	1	0	705	732	1004	977	0.0004	48.1
XLOC_002663	NONMMUT121578.1	89.36	47	5	0	589	635	661	707	1e-05	54
XLOC_002666	NONMMUT039064.2	91.84	49	3	1	202	250	1136	1183	3e-07	58
XLOC_002667	NONMMUT001779.2	93.67	79	5	0	199	277	454	532	5e-25	117
XLOC_002667	NONMMUT001779.2	93.67	79	5	0	115	193	454	532	4e-25	117
XLOC_002668	NONMMUT103060.1	100	24	0	0	659	682	5129	5106	0.0005	48.1
XLOC_002668	NONMMUT103060.1	100	24	0	0	932	955	5129	5106	0.0006	48.1
XLOC_002668	NONMMUT103060.1	100	24	0	0	832	855	5129	5106	0.0006	48.1
XLOC_002668	NONMMUT103060.1	100	24	0	0	258	281	5129	5106	0.0002	48.1
XLOC_002670	NONMMUT085755.1	91.23	57	4	1	2273	2329	944	999	6e-09	65.9
XLOC_002671	NONMMUT093701.1	92.86	42	2	1	994	1035	869	909	4e-05	52
XLOC_002671	NONMMUT093701.1	92.86	42	2	1	961	1002	869	909	4e-05	52
XLOC_002671	NONMMUT093701.1	92.86	42	2	1	607	648	869	909	3e-05	52
XLOC_002672	NONMMUT060953.2	92.41	79	6	0	214	292	1	79	5e-23	109
XLOC_002674	NONMMUT001878.2	90.48	63	6	0	138	200	1	63	1e-13	77.8
XLOC_002675	NONMMUT001878.2	86.67	195	26	0	1	195	293	487	4e-44	180
XLOC_002677	NONMMUT078194.1	90.73	151	14	0	253	403	684	534	9e-47	188
XLOC_002680	NONMMUT053633.2	100	35	0	0	1699	1733	450	484	8e-10	69.9
XLOC_002693	NONMMUT076005.1	80.15	131	26	0	33	163	68	198	2e-05	54
XLOC_002697	NONMMUT108140.1	92	50	3	1	929	978	462	510	1e-07	60
XLOC_002697	NONMMUT040264.2	100	24	0	0	310	333	259	236	0.0005	48.1
XLOC_002697	NONMMUT108140.1	92	50	3	1	653	702	462	510	1e-07	60
XLOC_002697	NONMMUT070345.2	92.59	54	4	0	915	968	4	57	8e-12	75.8
XLOC_002697	NONMMUT070345.2	92.59	54	4	0	1184	1237	4	57	9e-12	75.8
XLOC_002697	NONMMUT070345.2	92.59	54	4	0	1051	1104	4	57	8e-12	75.8
XLOC_002697	NONMMUT070345.2	92.59	54	4	0	2460	2513	4	57	1e-11	75.8
XLOC_002697	NONMMUT070345.2	92.59	54	4	0	696	749	4	57	8e-12	75.8
XLOC_002697	NONMMUT032692.2	93.75	48	3	0	1090	1137	10	57	5e-11	71.9
XLOC_002697	NONMMUT070345.2	92.59	54	4	0	802	855	4	57	8e-12	75.8
XLOC_002699	NONMMUT136535.1	92.5	40	3	0	1	40	432	393	1e-06	56
XLOC_002707	NONMMUT037129.2	87.25	204	23	3	99	301	541	742	1e-32	141
XLOC_002711	NONMMUT059647.2	93.33	45	3	0	262	306	2319	2363	2e-09	65.9
XLOC_002712	NONMMUT037360.2	96.43	28	1	0	53	80	99	72	0.0001	48.1
XLOC_002717	NONMMUT134532.1	91.23	57	4	1	133	189	828	883	2e-09	65.9
XLOC_002719	NONMMUT041276.2	91.11	45	4	0	129	173	4389	4433	5e-07	58
XLOC_002719	NONMMUT041276.2	91.11	45	4	0	129	173	4389	4433	5e-07	58
XLOC_002721	NONMMUT008416.2	94.44	36	2	0	229	264	2992	2957	1e-06	56
XLOC_002722	NONMMUT015454.2	96.77	31	1	0	24	54	958	928	3e-06	54
XLOC_002723	NONMMUT121578.1	90	40	4	0	44	83	660	699	0.0008	48.1
XLOC_002723	NONMMUT121578.1	90	40	4	0	44	83	660	699	0.0004	48.1
XLOC_002725	NONMMUT101102.1	94.87	39	2	0	1090	1128	187	225	8e-08	61.9
XLOC_002726	NONMMUT109178.1	96.3	81	3	0	519	599	327	247	5e-31	137
XLOC_002730	NONMMUT037990.2	90.57	53	5	0	698	750	165	113	2e-09	65.9
XLOC_002730	NONMMUT109226.1	88.94	823	72	9	646	1466	3214	2409	0	858
XLOC_002730	NONMMUT109226.1	88.94	823	72	9	646	1466	3214	2409	0	858
XLOC_002730	NONMMUT109226.1	88.94	823	72	9	646	1466	3214	2409	0	858
XLOC_002731	NONMMUT070345.2	82.93	82	14	0	859	940	10	91	4e-05	52
XLOC_002731	NONMMUT070345.2	82.93	82	14	0	859	940	10	91	4e-05	52
XLOC_002731	NONMMUT109231.1	86.75	83	11	0	799	881	563	481	6e-13	77.8
XLOC_002733	NONMMUT089270.1	100	26	0	0	9	34	769	744	7e-05	52
XLOC_002735	NONMMUT088245.1	94.12	34	2	0	829	862	412	445	5e-05	52
XLOC_002735	NONMMUT088245.1	94.12	34	2	0	780	813	412	445	6e-05	52
XLOC_002737	NONMMUT098535.1	90.91	44	4	0	608	651	231	188	3e-06	56
XLOC_002739	NONMMUT068513.2	94.29	35	2	0	93	127	2071	2105	7e-06	54
XLOC_002739	NONMMUT068513.2	94.29	35	2	0	93	127	2071	2105	3e-06	54
XLOC_002739	NONMMUT070345.2	93.75	32	2	0	47	78	50	19	0.0004	48.1
XLOC_002739	NONMMUT070345.2	93.75	32	2	0	47	78	50	19	0.0007	48.1
XLOC_002746	NONMMUT096531.1	90.48	42	4	0	2257	2298	681	722	8e-05	52
XLOC_002748	NONMMUT024875.2	100	27	0	0	180	206	975	949	5e-06	54
XLOC_002749	NONMMUT011949.2	89.09	55	5	1	227	281	23	76	1e-05	54
XLOC_002749	NONMMUT057333.2	90.57	53	5	0	968	1020	24	76	4e-09	65.9
XLOC_002750	NONMMUT077833.1	91.43	35	3	0	214	248	281	247	0.001	46.1
XLOC_002751	NONMMUT000985.2	93.63	1004	44	11	472	1462	1899	903	0	1279
XLOC_002753	NONMMUT000986.2	91.36	324	28	0	1194	1517	66	389	7e-116	420
XLOC_002754	NONMMUT108637.1	94.59	37	2	0	3	39	568	532	3e-07	58
XLOC_002754	NONMMUT108637.1	94.59	37	2	0	3	39	568	532	4e-07	58
XLOC_002755	NONMMUT020806.2	100	30	0	0	49	78	743	714	6e-08	60
XLOC_002757	NONMMUT020806.2	96.67	30	1	0	156	185	743	714	2e-05	52
XLOC_002763	NONMMUT136560.1	100	25	0	0	139	163	3331	3355	0.0001	50.1
XLOC_002768	NONMMUT131623.1	100	26	0	0	1	26	328	303	3e-05	52
XLOC_002770	NONMMUT078027.1	88.37	43	5	0	185	227	183	141	0.0007	46.1
XLOC_002770	NONMMUT078027.1	88.37	43	5	0	183	225	183	141	0.0007	46.1
XLOC_002780	NONMMUT050818.2	96.43	28	1	0	147	174	1286	1259	0.0004	48.1
XLOC_002784	NONMMUT001629.2	97.5	40	1	0	1230	1269	273	234	5e-11	71.9
XLOC_002785	NONMMUT134508.1	85.9	78	10	1	397	473	281	204	3e-07	60
XLOC_002786	NONMMUT071594.2	79.27	193	40	0	8	200	484	676	8e-10	65.9
XLOC_002786	NONMMUT071594.2	79.27	193	40	0	8	200	484	676	8e-10	65.9
XLOC_002791	NONMMUT001686.2	85.96	228	29	2	1225	1450	246	20	8e-45	184
XLOC_002795	NONMMUT079260.1	95.65	46	2	0	235	280	690	735	3e-12	75.8
XLOC_002795	NONMMUT079260.1	95.65	46	2	0	235	280	690	735	3e-12	75.8
XLOC_002795	NONMMUT079260.1	95.65	46	2	0	235	280	690	735	3e-12	75.8
XLOC_002796	NONMMUT121525.1	83.51	97	13	1	2624	2717	3154	3058	1e-07	61.9
XLOC_002796	NONMMUT100516.1	86.15	65	9	0	1848	1912	13416	13352	2e-06	58
XLOC_002800	NONMMUT108128.1	87.93	58	7	0	408	465	322	265	7e-08	60
XLOC_002803	NONMMUT069762.2	100	29	0	0	254	282	1674	1702	8e-07	58
XLOC_002803	NONMMUT069762.2	100	29	0	0	254	282	1674	1702	5e-07	58
XLOC_002803	NONMMUT069762.2	100	29	0	0	254	282	1674	1702	7e-07	58
XLOC_002803	NONMMUT069762.2	100	29	0	0	254	282	1674	1702	1e-06	58
XLOC_002813	NONMMUT078764.1	93.55	31	2	0	102	132	1112	1142	0.0005	46.1
XLOC_002819	NONMMUT055409.2	94.59	37	2	0	2549	2585	57	21	2e-06	58
XLOC_002819	NONMMUT055409.2	94.59	37	2	0	662	698	57	21	1e-06	58
XLOC_002820	NONMMUT134453.1	96.97	33	1	0	220	252	710	678	7e-07	58
XLOC_002825	NONMMUT070345.2	97.3	37	1	0	642	678	21	57	2e-09	65.9
XLOC_002833	NONMMUT088125.1	88.8	259	26	2	1391	1648	151	407	3e-70	270
XLOC_002833	NONMMUT040289.2	95.12	41	2	0	1195	1235	1227	1187	1e-08	65.9
XLOC_002833	NONMMUT088125.1	88.8	259	26	2	1312	1569	151	407	3e-70	270
XLOC_002833	NONMMUT088125.1	86	100	12	1	1210	1309	151	248	7e-14	81.8
XLOC_002833	NONMMUT088125.1	86	100	12	1	1312	1411	151	248	8e-14	81.8
XLOC_002833	NONMMUT088125.1	88.8	259	26	2	1748	2005	151	407	4e-70	270
XLOC_002833	NONMMUT088128.1	84.62	208	30	2	104	310	2	208	1e-32	143
XLOC_002833	NONMMUT088125.1	86	100	12	1	1729	1828	151	248	9e-14	81.8
XLOC_002833	NONMMUT088125.1	88.8	259	26	2	974	1231	151	407	3e-70	270
XLOC_002842	NONMMUT031472.2	100	23	0	0	150	172	435	413	0.0007	46.1
XLOC_002842	NONMMUT013697.2	88.68	53	5	1	199	250	1177	1229	7e-05	50.1
XLOC_002843	NONMMUT015947.2	94.87	39	2	0	1031	1069	227	265	4e-08	61.9
XLOC_002843	NONMMUT015947.2	94.87	39	2	0	895	933	227	265	4e-08	61.9
XLOC_002847	NONMMUT104744.1	92.45	53	4	0	658	710	87	35	1e-11	73.8
XLOC_002848	NONMMUT014466.2	83.91	174	27	1	1030	1202	119	292	4e-24	115
XLOC_002851	NONMMUT132254.1	91.11	45	4	0	209	253	6206	6162	5e-07	58
XLOC_002851	NONMMUT132254.1	91.11	45	4	0	192	236	6206	6162	5e-07	58
XLOC_002851	NONMMUT132254.1	91.11	45	4	0	197	241	6206	6162	5e-07	58
XLOC_002852	NONMMUT133722.1	90.24	41	4	0	278	318	510	470	0.0001	50.1
XLOC_002853	NONMMUT086351.1	85.34	116	17	0	192	307	1247	1132	1e-18	95.6
XLOC_002861	NONMMUT045894.2	96.3	27	1	0	65	91	812	786	0.0005	46.1
XLOC_002861	NONMMUT045894.2	96.3	27	1	0	104	130	812	786	0.0005	46.1
XLOC_002866	NONMMUT087877.1	93.16	234	16	0	373	606	66	299	8e-81	303
XLOC_002871	NONMMUT098988.1	92.16	51	3	1	1418	1468	4683	4732	7e-08	61.9
XLOC_002878	NONMMUT040289.2	97.62	42	1	0	778	819	1227	1186	4e-12	75.8
XLOC_002881	NONMMUT055190.2	92.86	56	3	1	139	194	900	954	2e-11	71.9
XLOC_002882	NONMMUT008099.2	96.43	28	1	0	378	405	2095	2068	0.0002	48.1
XLOC_002885	NONMMUT055409.2	91.38	58	5	0	178	235	10	67	4e-12	75.8
XLOC_002887	NONMMUT049732.2	91.67	36	3	0	357	392	840	875	0.0005	48.1
XLOC_002887	NONMMUT051792.2	87.5	88	11	0	6	93	52	139	4e-16	87.7
XLOC_002890	NONMMUT014466.2	89.19	74	8	0	2496	2569	211	284	4e-14	83.8
XLOC_002892	NONMMUT023905.2	100	23	0	0	3	25	1693	1715	0.0005	46.1
XLOC_002899	NONMMUT030701.2	91.86	86	7	0	259	344	116	201	9e-25	115
XLOC_002899	NONMMUT030701.2	91.86	86	7	0	774	859	116	201	2e-24	115
XLOC_002903	NONMMUT030747.2	93.04	345	24	0	1	345	350	6	7e-138	494
XLOC_002903	NONMMUT030748.2	95.29	191	5	3	256	445	38	225	1e-75	285
XLOC_002903	NONMMUT030748.2	95.34	193	5	3	600	791	36	225	1e-76	289
XLOC_002904	NONMMUT097493.1	97.44	39	1	0	625	663	1957	1919	1e-10	69.9
XLOC_002904	NONMMUT025446.2	100	24	0	0	176	199	3652	3675	0.0008	48.1
XLOC_002904	NONMMUT025446.2	100	24	0	0	176	199	3652	3675	0.0006	48.1
XLOC_002904	NONMMUT094109.1	96.77	31	1	0	65	95	3144	3114	1e-05	54
XLOC_002905	NONMMUT030811.2	84.15	82	12	1	306	387	605	525	5e-05	52
XLOC_002905	NONMMUT030811.2	84.15	82	12	1	306	387	605	525	6e-05	52
XLOC_002905	NONMMUT030811.2	84.15	82	12	1	306	387	605	525	6e-05	52
XLOC_002905	NONMMUT030811.2	84.15	82	12	1	306	387	605	525	0.0001	52
XLOC_002905	NONMMUT030811.2	84.15	82	12	1	306	387	605	525	7e-05	52
XLOC_002905	NONMMUT032692.2	91.38	58	5	0	1710	1767	10	67	5e-12	75.8
XLOC_002905	NONMMUT030811.2	84.15	82	12	1	306	387	605	525	3e-05	52
XLOC_002905	NONMMUT030811.2	84.15	82	12	1	306	387	605	525	6e-05	52
XLOC_002905	NONMMUT030811.2	84.15	82	12	1	105	186	605	525	4e-05	52
XLOC_002905	NONMMUT032692.2	91.38	58	5	0	958	1015	10	67	3e-12	75.8
XLOC_002905	NONMMUT032692.2	91.38	58	5	0	959	1016	10	67	3e-12	75.8
XLOC_002909	NONMMUT129999.1	97.14	35	1	0	422	456	141	107	3e-08	61.9
XLOC_002912	NONMMUT070345.2	91.23	57	5	0	1680	1736	20	76	2e-11	73.8
XLOC_002912	NONMMUT070345.2	91.23	57	5	0	1279	1335	20	76	2e-11	73.8
XLOC_002916	NONMMUT033116.2	91.89	37	3	0	346	382	2904	2940	6e-05	50.1
XLOC_002919	NONMMUT085502.1	96.55	29	1	0	335	363	1233	1205	7e-05	50.1
XLOC_002924	NONMMUT076859.1	100	27	0	0	803	829	2118	2092	2e-05	54
XLOC_002925	NONMMUT075574.1	94.59	37	2	0	347	383	5727	5763	1e-06	58
XLOC_002927	NONMMUT009086.2	87.37	95	12	0	439	533	115	21	1e-17	93.7
XLOC_002927	NONMMUT009086.2	86.32	117	16	0	485	601	137	21	3e-21	105
XLOC_002929	NONMMUT009085.2	88.05	159	19	0	247	405	741	899	5e-39	165
XLOC_002929	NONMMUT009085.2	86.9	84	11	0	3	86	816	899	2e-13	79.8
XLOC_002929	NONMMUT009085.2	92.68	41	3	0	10	50	859	899	7e-07	58
XLOC_002930	NONMMUT009081.2	85.48	186	21	4	1653	1835	1225	1043	2e-27	127
XLOC_002933	NONMMUT040289.2	91.11	45	4	0	1268	1312	1227	1183	1e-06	58
XLOC_002933	NONMMUT040289.2	91.11	45	4	0	1304	1348	1227	1183	1e-06	58
XLOC_002933	NONMMUT040289.2	91.11	45	4	0	2217	2261	1227	1183	2e-06	58
XLOC_002933	NONMMUT040289.2	91.11	45	4	0	1434	1478	1227	1183	1e-06	58
XLOC_002933	NONMMUT040289.2	91.11	45	4	0	1349	1393	1227	1183	1e-06	58
XLOC_002933	NONMMUT040289.2	91.11	45	4	0	1440	1484	1227	1183	1e-06	58
XLOC_002933	NONMMUT040289.2	91.11	45	4	0	991	1035	1227	1183	1e-06	58
XLOC_002933	NONMMUT040289.2	91.11	45	4	0	777	821	1227	1183	8e-07	58
XLOC_002933	NONMMUT040289.2	91.11	45	4	0	744	788	1227	1183	8e-07	58
XLOC_002933	NONMMUT040289.2	91.11	45	4	0	682	726	1227	1183	8e-07	58
XLOC_002933	NONMMUT040289.2	91.11	45	4	0	675	719	1227	1183	8e-07	58
XLOC_002933	NONMMUT040289.2	91.11	45	4	0	574	618	1227	1183	7e-07	58
XLOC_002933	NONMMUT040289.2	91.11	45	4	0	530	574	1227	1183	7e-07	58
XLOC_002935	NONMMUT008946.2	95.31	64	2	1	852	914	93	30	3e-18	95.6
XLOC_002939	NONMMUT026775.2	85.71	140	20	0	88	227	37	176	9e-26	119
XLOC_002939	NONMMUT069762.2	93.94	33	2	0	22	54	1674	1706	7e-05	50.1
XLOC_002940	NONMMUT070345.2	93.62	47	3	0	681	727	21	67	1e-10	69.9
XLOC_002940	NONMMUT070345.2	93.62	47	3	0	595	641	21	67	1e-10	69.9
XLOC_002940	NONMMUT070345.2	93.62	47	3	0	681	727	21	67	1e-10	69.9
XLOC_002955	NONMMUT057588.2	85.06	154	13	3	96	243	89	238	9e-24	113
XLOC_002955	NONMMUT070345.2	92.86	42	3	0	224	265	51	10	2e-07	60
XLOC_002961	NONMMUT131871.1	100	29	0	0	4	32	236	264	2e-07	58
XLOC_002964	NONMMUT071578.2	90.37	135	12	1	117	250	1201	1335	2e-37	157
XLOC_002964	NONMMUT071578.2	80.24	334	66	0	145	478	2000	2333	2e-31	139
XLOC_002964	NONMMUT071578.2	96.88	32	1	0	5	36	1406	1437	5e-07	56
XLOC_002964	NONMMUT071578.2	80.81	297	57	0	541	837	1942	2238	8e-31	137
XLOC_002964	NONMMUT071578.2	80.8	349	67	0	485	833	1942	2290	7e-38	161
XLOC_002964	NONMMUT071578.2	80.61	392	76	0	350	741	1942	2333	4e-42	174
XLOC_002971	NONMMUT070345.2	91.67	48	4	0	1754	1801	67	20	2e-08	63.9
XLOC_002979	NONMMUT057336.2	90.62	64	6	0	5	68	148	85	2e-13	79.8
XLOC_002980	NONMMUT117658.1	90.24	41	4	0	916	956	3083	3123	0.0002	50.1
XLOC_002981	NONMMUT126590.1	83.74	123	20	0	950	1072	906	784	5e-15	85.7
XLOC_002981	NONMMUT126590.1	83.74	123	20	0	1149	1271	906	784	5e-15	85.7
XLOC_002981	NONMMUT126590.1	83.74	123	20	0	1175	1297	906	784	5e-15	85.7
XLOC_002989	NONMMUT000557.2	92	75	6	0	350	424	2641	2567	5e-20	101
XLOC_002989	NONMMUT000557.2	92	75	6	0	763	837	2641	2567	7e-20	101
XLOC_002990	NONMMUT077601.1	86.24	109	12	2	989	1096	301	195	2e-14	83.8
XLOC_002992	NONMMUT075255.1	90.48	42	4	0	518	559	195	236	4e-05	52
XLOC_002992	NONMMUT075255.1	90.48	42	4	0	550	591	195	236	4e-05	52
XLOC_002992	NONMMUT075255.1	90.48	42	4	0	231	272	195	236	3e-05	52
XLOC_002993	NONMMUT051189.2	96.55	29	1	0	496	524	860	888	9e-05	50.1
XLOC_002993	NONMMUT051189.2	96.55	29	1	0	207	235	860	888	5e-05	50.1
XLOC_002999	NONMMUT054831.2	97.22	36	1	0	381	416	337	372	7e-09	63.9
XLOC_003002	NONMMUT122074.1	92	50	4	0	1737	1786	981	1030	1e-09	67.9
XLOC_003002	NONMMUT122074.1	92	50	4	0	1851	1900	981	1030	1e-09	67.9
XLOC_003006	NONMMUT000729.2	98.99	199	2	0	9	207	21	219	5e-103	379
XLOC_003006	NONMMUT000729.2	98.88	179	2	0	1	179	41	219	2e-91	339
XLOC_003006	NONMMUT000729.2	98.88	179	2	0	1	179	41	219	2e-91	339
XLOC_003006	NONMMUT000729.2	98.86	175	2	0	1	175	45	219	9e-89	331
XLOC_003006	NONMMUT075324.1	99.21	126	1	0	1	126	19	144	9e-63	242
XLOC_003006	NONMMUT075324.1	99.21	126	1	0	1	126	19	144	8e-63	242
XLOC_003006	NONMMUT075324.1	99.21	126	1	0	1	126	19	144	5e-62	242
XLOC_003006	NONMMUT075324.1	99.21	126	1	0	1	126	19	144	7e-63	242
XLOC_003006	NONMMUT075338.1	90.12	81	8	0	1194	1274	477	557	9e-19	97.6
XLOC_003006	NONMMUT122916.1	95	40	2	0	2178	2217	2871	2910	3e-08	63.9
XLOC_003006	NONMMUT122916.1	95	40	2	0	2581	2620	2871	2910	3e-08	63.9
XLOC_003006	NONMMUT122916.1	95	40	2	0	2201	2240	2871	2910	3e-08	63.9
XLOC_003006	NONMMUT122916.1	95	40	2	0	2169	2208	2871	2910	3e-08	63.9
XLOC_003006	NONMMUT104727.1	93.55	31	2	0	218	248	207	237	0.001	46.1
XLOC_003008	NONMMUT000745.2	95.52	223	10	0	678	900	8	230	1e-98	363
XLOC_003009	NONMMUT000747.2	89.64	280	28	1	4070	4349	2553	2831	2e-84	317
XLOC_003011	NONMMUT075365.1	93.38	136	8	1	842	977	1492	1626	6e-47	190
XLOC_003011	NONMMUT092933.1	91.94	62	4	1	93	154	92	152	3e-12	75.8
XLOC_003011	NONMMUT097778.1	82.01	139	24	1	1689	1826	605	743	6e-10	69.9
XLOC_003011	NONMMUT077706.1	90.68	236	21	1	1	236	235	1	1e-75	285
XLOC_003017	NONMMUT136448.1	95	40	2	0	146	185	1891	1930	7e-09	63.9
XLOC_003017	NONMMUT136448.1	95	40	2	0	146	185	1891	1930	7e-09	63.9
XLOC_003017	NONMMUT136448.1	95	40	2	0	145	184	1891	1930	3e-09	63.9
XLOC_003017	NONMMUT136448.1	95	40	2	0	128	167	1891	1930	5e-09	63.9
XLOC_003020	NONMMUT136535.1	92.31	39	3	0	533	571	394	432	7e-06	54
XLOC_003020	NONMMUT136535.1	92.31	39	3	0	474	512	394	432	7e-06	54
XLOC_003021	NONMMUT002468.2	83.33	144	24	0	341	484	295	438	2e-18	95.6
XLOC_003022	NONMMUT078802.1	89.26	149	16	0	102	250	535	683	2e-40	168
XLOC_003022	NONMMUT078802.1	89.26	149	16	0	102	250	535	683	2e-40	168
XLOC_003022	NONMMUT078802.1	89.26	149	16	0	102	250	535	683	2e-40	168
XLOC_003026	NONMMUT054345.2	100	30	0	0	1069	1098	186	215	2e-07	60
XLOC_003027	NONMMUT088745.1	92.86	42	3	0	895	936	764	723	1e-07	60
XLOC_003030	NONMMUT070345.2	91.3	46	4	0	1470	1515	22	67	3e-07	60
XLOC_003034	NONMMUT059591.2	97.37	38	1	0	496	533	1303	1266	5e-10	67.9
XLOC_003034	NONMMUT059591.2	97.37	38	1	0	527	564	1303	1266	5e-10	67.9
XLOC_003036	NONMMUT125517.1	92.11	38	3	0	45	82	3560	3597	2e-05	52
XLOC_003050	NONMMUT011548.2	96.55	29	1	0	643	671	1583	1611	0.0001	50.1
XLOC_003050	NONMMUT011548.2	96.55	29	1	0	563	591	1583	1611	9e-05	50.1
XLOC_003052	NONMMUT055409.2	100	26	0	0	699	724	250	275	3e-05	52
XLOC_003057	NONMMUT109570.1	97.3	37	1	0	50	86	381	417	1e-09	65.9
XLOC_003057	NONMMUT109570.1	97.3	37	1	0	28	64	381	417	9e-10	65.9
XLOC_003069	NONMMUT086807.1	87.5	144	16	2	1442	1583	1513	1370	1e-27	127
XLOC_003069	NONMMUT086807.1	87.5	144	16	2	1354	1495	1513	1370	2e-27	127
XLOC_003071	NONMMUT040289.2	95.24	42	2	0	425	466	1186	1227	6e-10	67.9
XLOC_003072	NONMMUT088153.1	90	50	5	0	1281	1330	260	309	3e-07	60
XLOC_003072	NONMMUT088153.1	90	50	5	0	1187	1236	260	309	3e-07	60
XLOC_003072	NONMMUT086789.1	88.89	72	8	0	3254	3325	263	192	5e-13	79.8
XLOC_003072	NONMMUT086789.1	82.76	87	15	0	421	507	503	417	6e-06	54
XLOC_003072	NONMMUT086789.1	88.81	143	14	2	829	971	263	123	5e-32	141
XLOC_003073	NONMMUT004735.2	100	24	0	0	185	208	2750	2773	0.0005	48.1
XLOC_003073	NONMMUT004735.2	100	24	0	0	210	233	2750	2773	0.0005	48.1
XLOC_003079	NONMMUT070345.2	89.66	58	6	0	658	715	67	10	2e-09	67.9
XLOC_003084	NONMMUT070345.2	94.74	38	2	0	1810	1847	57	20	4e-07	60
XLOC_003093	NONMMUT068513.2	87.5	48	6	0	1272	1319	2085	2132	0.0008	48.1
XLOC_003102	NONMMUT069762.2	100	31	0	0	783	813	1675	1705	3e-08	61.9
XLOC_003102	NONMMUT069762.2	100	31	0	0	681	711	1675	1705	3e-08	61.9
XLOC_003103	NONMMUT032989.2	92.5	40	3	0	1801	1840	2519	2480	6e-06	56
XLOC_003103	NONMMUT013707.2	89.47	95	7	1	4543	4634	1872	1966	1e-20	105
XLOC_003104	NONMMUT049458.2	92.5	40	3	0	11	50	2068	2107	2e-06	56
XLOC_003104	NONMMUT049458.2	92.5	40	3	0	11	50	2068	2107	1e-06	56
XLOC_003107	NONMMUT042675.2	94.12	51	2	1	427	477	3064	3015	1e-10	69.9
XLOC_003119	NONMMUT090750.1	96.43	28	1	0	509	536	655	682	0.0005	48.1
XLOC_003121	NONMMUT055409.2	89.8	49	5	0	96	144	68	20	3e-07	58
XLOC_003121	NONMMUT055409.2	89.8	49	5	0	96	144	68	20	3e-07	58
XLOC_003121	NONMMUT055409.2	89.8	49	5	0	96	144	68	20	5e-07	58
XLOC_003121	NONMMUT055409.2	89.8	49	5	0	96	144	68	20	5e-07	58
XLOC_003123	NONMMUT057333.2	89.66	58	6	0	175	232	10	67	4e-10	67.9
XLOC_003124	NONMMUT102025.1	92.98	57	4	0	3713	3769	2832	2888	2e-13	81.8
XLOC_003124	NONMMUT102025.1	92.98	57	4	0	3713	3769	2832	2888	2e-13	81.8
XLOC_003126	NONMMUT051782.2	86.79	53	3	1	787	835	216	164	0.0005	48.1
XLOC_003130	NONMMUT030858.2	91.89	37	3	0	240	276	1463	1499	0.0001	50.1
XLOC_003130	NONMMUT030858.2	91.89	37	3	0	293	329	1463	1499	0.0002	50.1
XLOC_003130	NONMMUT030858.2	91.89	37	3	0	284	320	1463	1499	0.0002	50.1
XLOC_003132	NONMMUT108146.1	100	23	0	0	212	234	52	74	0.0008	46.1
XLOC_003134	NONMMUT098285.1	97.3	37	1	0	2224	2260	8245	8281	8e-09	65.9
XLOC_003138	NONMMUT072249.2	86.11	72	10	0	515	586	365	436	3e-08	63.9
XLOC_003138	NONMMUT072249.2	86.11	72	10	0	515	586	365	436	3e-08	63.9
XLOC_003138	NONMMUT014693.2	95.45	44	2	0	8673	8716	540	497	4e-10	71.9
XLOC_003139	NONMMUT001798.2	100	34	0	0	246	279	3073	3040	8e-10	67.9
XLOC_003144	NONMMUT098512.1	93.62	47	2	1	13	59	4169	4124	3e-08	61.9
XLOC_003149	NONMMUT097180.1	92.73	55	3	1	546	600	1032	979	2e-10	69.9
XLOC_003150	NONMMUT102618.1	90.03	331	32	1	1092	1422	331	2	8e-106	387
XLOC_003150	NONMMUT102618.1	90.03	331	32	1	1092	1422	331	2	1e-105	387
XLOC_003153	NONMMUT102625.1	96.77	93	3	0	240	332	220	128	2e-38	161
XLOC_003154	NONMMUT109367.1	86.89	61	7	1	851	911	2582	2523	0.0001	50.1
XLOC_003155	NONMMUT102646.1	94.29	35	2	0	435	469	992	958	4e-06	54
XLOC_003156	NONMMUT014466.2	91.49	47	4	0	820	866	246	292	9e-08	61.9
XLOC_003156	NONMMUT014466.2	91.49	47	4	0	820	866	246	292	9e-08	61.9
XLOC_003158	NONMMUT055409.2	100	26	0	0	2490	2515	275	250	9e-05	52
XLOC_003158	NONMMUT055409.2	100	26	0	0	2554	2579	275	250	0.0001	52
XLOC_003159	NONMMUT101620.1	96.05	76	3	0	2200	2275	1	76	2e-27	127
XLOC_003159	NONMMUT101620.1	96.05	76	3	0	2173	2248	1	76	2e-27	127
XLOC_003159	NONMMUT031122.2	100	34	0	0	994	1027	1502	1469	1e-09	67.9
XLOC_003159	NONMMUT031122.2	100	34	0	0	994	1027	1502	1469	2e-09	67.9
XLOC_003159	NONMMUT101620.1	96.05	76	3	0	855	930	1	76	9e-28	127
XLOC_003159	NONMMUT075700.1	92.5	40	3	0	20	59	487	448	3e-06	56
XLOC_003164	NONMMUT091806.1	96.77	31	1	0	527	557	1374	1344	5e-06	54
XLOC_003169	NONMMUT083361.1	95.24	168	8	0	8	175	429	262	4e-71	270
XLOC_003170	NONMMUT070345.2	92.98	57	4	0	844	900	57	1	5e-14	81.8
XLOC_003171	NONMMUT032420.2	92.11	76	6	0	461	536	76	1	7e-21	103
XLOC_003171	NONMMUT032420.2	92.11	76	6	0	461	536	76	1	1e-20	103
XLOC_003172	NONMMUT070345.2	93.88	49	3	0	30	78	67	19	9e-12	73.8
XLOC_003174	NONMMUT083303.1	100	34	0	0	212	245	34	1	2e-10	67.9
XLOC_003175	NONMMUT057406.2	90.7	43	4	0	1291	1333	1228	1270	2e-05	54
XLOC_003175	NONMMUT057406.2	90.7	43	4	0	1291	1333	1228	1270	2e-05	54
XLOC_003175	NONMMUT057406.2	90.7	43	4	0	1291	1333	1228	1270	3e-05	54
XLOC_003175	NONMMUT057406.2	90.7	43	4	0	1291	1333	1228	1270	2e-05	54
XLOC_003175	NONMMUT057406.2	90.7	43	4	0	1291	1333	1228	1270	3e-05	54
XLOC_003175	NONMMUT057406.2	90.7	43	4	0	1291	1333	1228	1270	3e-05	54
XLOC_003175	NONMMUT057406.2	90.7	43	4	0	1291	1333	1228	1270	2e-05	54
XLOC_003175	NONMMUT057406.2	90.7	43	4	0	1291	1333	1228	1270	3e-05	54
XLOC_003182	NONMMUT034977.2	91.67	36	3	0	207	242	983	1018	0.001	48.1
XLOC_003183	NONMMUT069762.2	93.94	33	2	0	920	952	1673	1705	0.0001	50.1
XLOC_003183	NONMMUT069762.2	93.94	33	2	0	652	684	1673	1705	9e-05	50.1
XLOC_003187	NONMMUT057810.2	90	80	4	2	6	82	1181	1103	3e-14	83.8
XLOC_003189	NONMMUT057807.2	94.61	167	9	0	3314	3480	2098	1932	3e-67	260
XLOC_003192	NONMMUT012780.2	91.49	94	8	0	1087	1180	979	1072	2e-26	123
XLOC_003192	NONMMUT012780.2	91.49	94	8	0	1087	1180	979	1072	2e-26	123
XLOC_003192	NONMMUT012780.2	91.49	94	8	0	1087	1180	979	1072	2e-26	123
XLOC_003192	NONMMUT012780.2	91.49	94	8	0	1087	1180	979	1072	2e-26	123
XLOC_003192	NONMMUT114317.1	100	27	0	0	51	77	731	757	8e-06	54
XLOC_003194	NONMMUT037034.2	100	29	0	0	429	457	2352	2324	3e-07	58
XLOC_003195	NONMMUT104744.1	97.3	37	1	0	1683	1719	51	87	4e-09	65.9
XLOC_003206	NONMMUT094828.1	91.11	45	4	0	35	79	1109	1153	1e-07	58
XLOC_003209	NONMMUT104649.1	100	23	0	0	181	203	434	412	0.0005	46.1
XLOC_003211	NONMMUT059570.2	96.88	32	1	0	8	39	821	852	2e-06	56
XLOC_003212	NONMMUT058769.2	87.5	64	8	0	522	585	1567	1504	2e-08	63.9
XLOC_003216	NONMMUT069762.2	100	34	0	0	447	480	1706	1673	7e-10	67.9
XLOC_003216	NONMMUT040289.2	94.12	34	2	0	135	168	1186	1219	4e-05	52
XLOC_003216	NONMMUT040289.2	94.12	34	2	0	135	168	1186	1219	3e-05	52
XLOC_003221	NONMMUT094582.1	96.3	27	1	0	38	64	832	806	0.0007	46.1
XLOC_003222	NONMMUT039064.2	92.59	54	3	1	320	373	1131	1183	1e-09	67.9
XLOC_003222	NONMMUT070345.2	91.04	67	6	0	1996	2062	1	67	6e-15	85.7
XLOC_003229	NONMMUT000631.2	87.98	183	17	2	29	211	317	140	3e-43	178
XLOC_003229	NONMMUT000631.2	87.98	183	17	2	29	211	317	140	3e-43	178
XLOC_003229	NONMMUT000631.2	87.98	183	17	2	29	211	317	140	3e-43	178
XLOC_003234	NONMMUT050660.2	92.68	41	3	0	292	332	3116	3156	2e-07	58
XLOC_003236	NONMMUT071328.2	92.98	57	4	0	104	160	149	93	8e-15	81.8
XLOC_003237	NONMMUT064984.2	91.3	46	4	0	324	369	1492	1537	9e-08	60
XLOC_003245	NONMMUT088062.1	92.45	53	4	0	1102	1154	1813	1865	1e-11	73.8
XLOC_003248	NONMMUT077696.1	93.53	139	9	0	3	141	388	250	2e-51	204
XLOC_003248	NONMMUT077696.1	93.53	139	9	0	3	141	388	250	2e-51	204
XLOC_003249	NONMMUT002115.2	94.87	39	2	0	51	89	1836	1798	2e-08	61.9
XLOC_003249	NONMMUT002115.2	94.87	39	2	0	51	89	1836	1798	1e-08	61.9
XLOC_003249	NONMMUT002115.2	94.87	39	2	0	51	89	1836	1798	1e-08	61.9
XLOC_003252	NONMMUT075505.1	93.94	33	2	0	294	326	638	670	0.0002	50.1
XLOC_003252	NONMMUT077706.1	94.67	150	7	1	1133	1282	150	2	2e-57	226
XLOC_003252	NONMMUT077706.1	95.17	145	6	1	77	221	145	2	1e-57	224
XLOC_003252	NONMMUT077706.1	94.7	151	7	1	75	225	150	1	7e-59	228
XLOC_003254	NONMMUT078764.1	100	24	0	0	375	398	1065	1088	0.0003	48.1
XLOC_003257	NONMMUT070345.2	93.62	47	3	0	462	508	67	21	1e-10	69.9
XLOC_003261	NONMMUT020806.2	97.06	34	1	0	1351	1384	743	710	3e-07	60
XLOC_003261	NONMMUT039735.2	91.04	67	6	0	126	192	312	246	9e-16	85.7
XLOC_003264	NONMMUT039772.2	94.29	35	2	0	898	932	495	461	1e-05	54
XLOC_003266	NONMMUT073198.2	85.48	62	9	0	200	261	427	488	4e-05	52
XLOC_003270	NONMMUT056353.2	86.44	59	8	0	1436	1494	1269	1211	3e-05	54
XLOC_003273	NONMMUT070345.2	88.06	67	8	0	590	656	76	10	2e-10	69.9
XLOC_003276	NONMMUT008416.2	100	23	0	0	300	322	2973	2995	0.001	46.1
XLOC_003276	NONMMUT008416.2	100	23	0	0	180	202	2973	2995	0.0007	46.1
XLOC_003282	NONMMUT134357.1	90.7	43	4	0	425	467	247	205	8e-06	54
XLOC_003283	NONMMUT065286.2	91.89	37	3	0	1188	1224	689	725	0.0005	50.1
XLOC_003286	NONMMUT031834.2	86.6	97	13	0	7	103	1392	1296	7e-17	89.7
XLOC_003287	NONMMUT131181.1	97.14	35	1	0	244	278	4903	4937	1e-08	61.9
XLOC_003291	NONMMUT013778.2	93.33	60	3	1	283	342	870	928	1e-13	79.8
XLOC_003291	NONMMUT013778.2	93.33	60	3	1	283	342	870	928	1e-13	79.8
XLOC_003295	NONMMUT070345.2	100	30	0	0	495	524	50	21	2e-07	60
XLOC_003297	NONMMUT122916.1	97.3	37	1	0	67	103	2907	2871	2e-09	65.9
XLOC_003298	NONMMUT117458.1	100	26	0	0	38	63	218	243	5e-05	52
XLOC_003299	NONMMUT109656.1	93.62	47	2	1	1	47	531	486	2e-08	61.9
XLOC_003300	NONMMUT033116.2	91.89	37	3	0	1272	1308	2925	2889	0.0002	50.1
XLOC_003302	NONMMUT136271.1	91.3	46	3	1	824	869	2139	2095	8e-05	52
XLOC_003307	NONMMUT019762.2	96.43	28	1	0	416	443	39	12	0.0002	48.1
XLOC_003307	NONMMUT126361.1	94.64	56	3	0	466	521	101	156	4e-16	87.7
XLOC_003307	NONMMUT126361.1	94.64	56	3	0	1167	1222	101	156	1e-15	87.7
XLOC_003308	NONMMUT056353.2	88.68	53	6	0	294	346	1273	1221	3e-07	58
XLOC_003312	NONMMUT070345.2	84.93	73	11	0	429	501	76	4	1e-06	58
XLOC_003312	NONMMUT109381.1	93.33	45	2	1	643	687	1946	1989	5e-07	58
XLOC_003313	NONMMUT032692.2	94.87	39	2	0	1097	1135	19	57	3e-07	61.9
XLOC_003319	NONMMUT033534.2	89.47	95	10	0	660	754	2534	2628	1e-22	109
XLOC_003320	NONMMUT105093.1	90.11	91	9	0	2511	2601	181	271	5e-22	109
XLOC_003321	NONMMUT008099.2	100	28	0	0	474	501	2095	2068	1e-06	56
XLOC_003323	NONMMUT066141.2	91.07	56	4	1	611	666	6545	6491	6e-09	63.9
XLOC_003325	NONMMUT109381.1	93.33	45	2	1	1016	1060	1946	1989	9e-07	58
XLOC_003325	NONMMUT025780.2	95	40	2	0	1261	1300	869	908	1e-08	63.9
XLOC_003325	NONMMUT070345.2	89.36	47	5	0	1771	1817	21	67	2e-05	54
XLOC_003325	NONMMUT117672.1	90.48	42	4	0	409	450	2812	2771	2e-05	52
XLOC_003325	NONMMUT109381.1	93.33	45	2	1	1058	1102	1946	1989	9e-07	58
XLOC_003325	NONMMUT109381.1	93.33	45	2	1	937	981	1946	1989	8e-07	58
XLOC_003325	NONMMUT109381.1	93.33	45	2	1	907	951	1946	1989	8e-07	58
XLOC_003325	NONMMUT070345.2	89.36	47	5	0	1458	1504	21	67	2e-05	54
XLOC_003325	NONMMUT109381.1	93.33	45	2	1	1125	1169	1946	1989	9e-07	58
XLOC_003325	NONMMUT070345.2	89.36	47	5	0	1371	1417	21	67	1e-05	54
XLOC_003329	NONMMUT004328.2	89.86	69	7	0	374	442	10	78	5e-14	81.8
XLOC_003332	NONMMUT032692.2	95.12	41	2	0	1233	1273	10	50	3e-09	65.9
XLOC_003332	NONMMUT032692.2	95.12	41	2	0	1999	2039	10	50	5e-09	65.9
XLOC_003334	NONMMUT106091.1	90.91	44	3	1	380	423	1308	1350	0.0005	48.1
XLOC_003334	NONMMUT106091.1	90.91	44	3	1	116	159	1308	1350	0.0003	48.1
XLOC_003345	NONMMUT052900.2	88.33	497	58	0	182	678	4	500	7e-148	525
XLOC_003345	NONMMUT052900.2	88.33	497	58	0	72	568	4	500	2e-147	525
XLOC_003345	NONMMUT052900.2	88.33	497	58	0	70	566	4	500	6e-148	525
XLOC_003345	NONMMUT052900.2	86.3	146	20	0	30	175	713	858	9e-29	131
XLOC_003346	NONMMUT095313.1	86.89	61	7	1	48	108	2042	2101	0.0001	50.1
XLOC_003346	NONMMUT070345.2	89.55	67	7	0	914	980	10	76	8e-13	77.8
XLOC_003353	NONMMUT051192.2	92.68	41	3	0	2283	2323	2675	2715	2e-06	58
XLOC_003353	NONMMUT051192.2	92.68	41	3	0	3493	3533	2675	2715	3e-06	58
XLOC_003353	NONMMUT051192.2	92.68	41	3	0	2731	2771	2675	2715	2e-06	58
XLOC_003353	NONMMUT051192.2	92.68	41	3	0	3070	3110	2675	2715	2e-06	58
XLOC_003359	NONMMUT070345.2	91.23	57	5	0	882	938	1	57	9e-12	73.8
XLOC_003359	NONMMUT070345.2	91.23	57	5	0	677	733	1	57	7e-12	73.8
XLOC_003359	NONMMUT070345.2	91.23	57	5	0	660	716	1	57	7e-12	73.8
XLOC_003360	NONMMUT068926.2	100	24	0	0	838	861	481	504	0.0006	48.1
XLOC_003360	NONMMUT068926.2	100	24	0	0	604	627	481	504	0.0005	48.1
XLOC_003365	NONMMUT135361.1	92.45	53	3	1	1995	2047	12	63	5e-09	65.9
XLOC_003371	NONMMUT101028.1	90	60	6	0	790	849	315	256	6e-11	71.9
XLOC_003373	NONMMUT038827.2	80.95	357	43	4	2502	2854	2822	3157	6e-43	178
XLOC_003375	NONMMUT107579.1	91.67	60	5	0	324	383	121	180	2e-13	79.8
XLOC_003380	NONMMUT038975.2	91.67	36	3	0	62	97	3728	3693	0.0002	48.1
XLOC_003380	NONMMUT038975.2	91.67	36	3	0	61	96	3728	3693	0.0003	48.1
XLOC_003380	NONMMUT038975.2	91.67	36	3	0	61	96	3728	3693	0.0003	48.1
XLOC_003380	NONMMUT038975.2	91.67	36	3	0	56	91	3728	3693	0.0002	48.1
XLOC_003380	NONMMUT038975.2	91.67	36	3	0	51	86	3728	3693	0.0002	48.1
XLOC_003380	NONMMUT038975.2	91.67	36	3	0	49	84	3728	3693	0.0004	48.1
XLOC_003380	NONMMUT038975.2	91.67	36	3	0	49	84	3728	3693	0.0003	48.1
XLOC_003380	NONMMUT038975.2	91.67	36	3	0	30	65	3728	3693	0.0002	48.1
XLOC_003385	NONMMUT059863.2	89.58	48	5	0	1350	1397	9	56	6e-06	56
XLOC_003385	NONMMUT059863.2	89.58	48	5	0	2174	2221	9	56	8e-06	56
XLOC_003385	NONMMUT122511.1	92.16	51	4	0	1554	1604	729	779	4e-10	69.9
XLOC_003386	NONMMUT122916.1	90.32	62	6	0	1089	1150	2847	2908	6e-12	75.8
XLOC_003388	NONMMUT055409.2	91.53	59	5	0	1970	2028	21	79	2e-12	77.8
XLOC_003389	NONMMUT109381.1	93.33	45	2	1	1660	1704	1946	1989	2e-06	58
XLOC_003389	NONMMUT109381.1	93.33	45	2	1	1705	1749	1946	1989	2e-06	58
XLOC_003389	NONMMUT109381.1	93.33	45	2	1	1694	1738	1946	1989	2e-06	58
XLOC_003390	NONMMUT122916.1	96.88	32	1	0	1204	1235	2908	2877	3e-06	56
XLOC_003390	NONMMUT122916.1	96.88	32	1	0	981	1012	2908	2877	2e-06	56
XLOC_003390	NONMMUT122916.1	96.88	32	1	0	858	889	2908	2877	2e-06	56
XLOC_003393	NONMMUT071361.2	100	24	0	0	86	109	542	565	0.0001	48.1
XLOC_003394	NONMMUT056353.2	88.16	76	7	2	1633	1708	1315	1242	2e-08	63.9
XLOC_003397	NONMMUT074373.2	90	70	6	1	918	987	1940	1872	4e-12	75.8
XLOC_003399	NONMMUT136271.1	91.84	49	3	1	1291	1339	1528	1575	9e-07	58
XLOC_003399	NONMMUT136271.1	91.84	49	3	1	1767	1815	1528	1575	1e-06	58
XLOC_003399	NONMMUT136271.1	91.84	49	3	1	1390	1438	1528	1575	9e-07	58
XLOC_003399	NONMMUT136271.1	91.84	49	3	1	1451	1499	1528	1575	1e-06	58
XLOC_003399	NONMMUT136271.1	91.84	49	3	1	1475	1523	1528	1575	1e-06	58
XLOC_003399	NONMMUT136271.1	91.84	49	3	1	1292	1340	1528	1575	9e-07	58
XLOC_003399	NONMMUT136271.1	91.84	49	3	1	1102	1150	1528	1575	8e-07	58
XLOC_003402	NONMMUT043571.2	87.5	64	8	0	47	110	242	305	3e-09	63.9
XLOC_003407	NONMMUT069649.2	97.5	40	1	0	277	316	191	152	5e-11	71.9
XLOC_003411	NONMMUT072833.2	97.5	40	0	1	383	422	2796	2758	5e-09	63.9
XLOC_003411	NONMMUT072833.2	97.5	40	0	1	403	442	2796	2758	5e-09	63.9
XLOC_003412	NONMMUT011949.2	96.88	32	1	0	200	231	78	47	1e-06	56
XLOC_003429	NONMMUT089499.1	92.86	56	3	1	1474	1529	157	103	7e-11	71.9
XLOC_003439	NONMMUT091109.1	92.45	53	4	0	82	134	944	996	4e-11	73.8
XLOC_003439	NONMMUT091109.1	92.45	53	4	0	64	116	944	996	4e-11	73.8
XLOC_003440	NONMMUT135361.1	95	40	2	0	34	73	50	11	1e-08	63.9
XLOC_003444	NONMMUT070345.2	94.74	38	2	0	853	890	19	56	2e-07	60
XLOC_003449	NONMMUT032692.2	92	50	4	0	885	934	19	68	1e-09	67.9
XLOC_003449	NONMMUT032692.2	92	50	4	0	353	402	19	68	9e-10	67.9
XLOC_003449	NONMMUT014473.2	100	25	0	0	1284	1308	1850	1874	0.0004	50.1
XLOC_003449	NONMMUT032692.2	92	50	4	0	372	421	19	68	1e-09	67.9
XLOC_003449	NONMMUT032692.2	92	50	4	0	485	534	19	68	1e-09	67.9
XLOC_003451	NONMMUT068513.2	85.71	63	9	0	1298	1360	2120	2058	2e-05	54
XLOC_003451	NONMMUT068513.2	85.71	63	9	0	1190	1252	2120	2058	1e-05	54
XLOC_003455	NONMMUT090569.1	91.89	37	3	0	293	329	895	859	9e-05	50.1
XLOC_003455	NONMMUT090569.1	91.89	37	3	0	290	326	895	859	9e-05	50.1
XLOC_003455	NONMMUT090569.1	91.89	37	3	0	221	257	895	859	8e-05	50.1
XLOC_003457	NONMMUT095531.1	96.3	27	1	0	189	215	4113	4139	0.0008	46.1
XLOC_003461	NONMMUT079092.1	89.29	56	6	0	713	768	613	668	1e-08	63.9
XLOC_003461	NONMMUT079092.1	89.29	56	6	0	588	643	613	668	9e-09	63.9
XLOC_003461	NONMMUT079092.1	89.29	56	6	0	524	579	613	668	8e-09	63.9
XLOC_003461	NONMMUT079092.1	89.29	56	6	0	546	601	613	668	8e-09	63.9
XLOC_003461	NONMMUT079092.1	89.29	56	6	0	527	582	613	668	8e-09	63.9
XLOC_003461	NONMMUT079092.1	89.29	56	6	0	432	487	613	668	7e-09	63.9
XLOC_003461	NONMMUT079092.1	89.29	56	6	0	372	427	613	668	7e-09	63.9
XLOC_003466	NONMMUT104319.1	90	60	5	1	847	906	2446	2388	8e-09	63.9
XLOC_003469	NONMMUT134218.1	92.96	71	5	0	373	443	2531	2601	8e-20	101
XLOC_003469	NONMMUT134218.1	92.96	71	5	0	346	416	2531	2601	8e-20	101
XLOC_003469	NONMMUT134218.1	92.96	71	5	0	123	193	2531	2601	7e-20	101
XLOC_003469	NONMMUT134218.1	92.96	71	5	0	180	250	2531	2601	7e-20	101
XLOC_003469	NONMMUT134218.1	92.96	71	5	0	129	199	2531	2601	7e-20	101
XLOC_003470	NONMMUT068801.2	100	24	0	0	321	344	1045	1068	0.0003	48.1
XLOC_003470	NONMMUT064753.2	100	25	0	0	996	1020	1224	1200	0.0001	50.1
XLOC_003470	NONMMUT121578.1	94.44	36	2	0	605	640	660	695	3e-06	56
XLOC_003470	NONMMUT064753.2	100	25	0	0	597	621	1224	1200	9e-05	50.1
XLOC_003472	NONMMUT127551.1	94.12	34	2	0	123	156	1152	1119	1e-05	52
XLOC_003473	NONMMUT015947.2	94.87	39	2	0	1263	1301	227	265	7e-08	61.9
XLOC_003475	NONMMUT057018.2	92.59	54	3	1	1481	1534	1720	1772	2e-09	67.9
XLOC_003475	NONMMUT107279.1	91.07	56	4	1	1195	1250	96	42	1e-08	63.9
XLOC_003476	NONMMUT070345.2	93.88	49	3	0	1138	1186	19	67	1e-11	73.8
XLOC_003478	NONMMUT132437.1	91.21	91	8	0	407	497	932	842	2e-24	117
XLOC_003478	NONMMUT132437.1	91.21	91	8	0	192	282	932	842	9e-25	117
XLOC_003478	NONMMUT132437.1	91.21	91	8	0	121	211	932	842	8e-25	117
XLOC_003478	NONMMUT132437.1	88.42	95	11	0	264	358	621	527	4e-20	101
XLOC_003486	NONMMUT060622.2	91.89	37	3	0	516	552	2264	2228	8e-05	50.1
XLOC_003487	NONMMUT096600.1	94.74	38	2	0	426	463	211	248	1e-07	60
XLOC_003489	NONMMUT126708.1	97.14	35	1	0	956	990	60	94	4e-08	61.9
XLOC_003490	NONMMUT076396.1	87.59	145	18	0	1416	1560	212	356	6e-33	145
XLOC_003490	NONMMUT042675.2	90.38	52	4	1	377	428	3011	3061	1e-06	56
XLOC_003501	NONMMUT068466.2	92.86	56	4	0	35	90	202	257	4e-14	79.8
XLOC_003507	NONMMUT098512.1	93.88	49	2	1	228	276	4120	4167	3e-09	65.9
XLOC_003516	NONMMUT053358.2	94.59	37	2	0	493	529	2068	2104	1e-06	58
XLOC_003516	NONMMUT053358.2	94.59	37	2	0	99	135	2068	2104	4e-07	58
XLOC_003519	NONMMUT014466.2	90.48	42	4	0	1648	1689	297	256	6e-05	52
XLOC_003527	NONMMUT064283.2	87.25	102	12	1	242	342	1018	917	1e-16	91.7
XLOC_003528	NONMMUT126369.1	88.37	43	5	0	44	86	2520	2562	0.0006	46.1
XLOC_003532	NONMMUT127661.1	94.12	34	2	0	243	276	805	772	1e-05	52
XLOC_003534	NONMMUT136555.1	96.67	30	1	0	428	457	828	857	2e-05	52
XLOC_003535	NONMMUT034568.2	100	23	0	0	7	29	875	853	0.001	46.1
XLOC_003537	NONMMUT005604.2	96.43	28	1	0	140	167	467	440	0.0003	48.1
XLOC_003543	NONMMUT135361.1	92.31	39	3	0	11	49	50	12	4e-06	54
XLOC_003544	NONMMUT070345.2	89.29	56	6	0	425	480	56	1	1e-08	63.9
XLOC_003547	NONMMUT032692.2	93.75	48	3	0	1599	1646	57	10	7e-11	71.9
XLOC_003550	NONMMUT014466.2	93.48	46	3	0	108	153	246	291	8e-10	67.9
XLOC_003550	NONMMUT014466.2	93.48	46	3	0	108	153	246	291	7e-10	67.9
XLOC_003550	NONMMUT014466.2	93.48	46	3	0	108	153	246	291	6e-10	67.9
XLOC_003550	NONMMUT014466.2	93.48	46	3	0	108	153	246	291	7e-10	67.9
XLOC_003550	NONMMUT014466.2	93.48	46	3	0	108	153	246	291	1e-09	67.9
XLOC_003552	NONMMUT016590.2	98.8	83	1	0	146	228	766	684	4e-37	157
XLOC_003555	NONMMUT105820.1	85.07	134	17	3	1315	1448	732	602	1e-14	83.8
XLOC_003555	NONMMUT033630.2	89.13	92	9	1	1637	1727	560	469	6e-18	95.6
XLOC_003555	NONMMUT033634.2	84.72	144	19	3	1315	1458	1014	874	1e-15	87.7
XLOC_003555	NONMMUT033634.2	84.72	144	19	3	1315	1458	1014	874	1e-15	87.7
XLOC_003555	NONMMUT033634.2	84.72	144	19	3	1315	1458	1014	874	1e-15	87.7
XLOC_003555	NONMMUT033634.2	84.72	144	19	3	1315	1458	1014	874	1e-15	87.7
XLOC_003555	NONMMUT033630.2	89.13	92	9	1	1637	1727	560	469	6e-18	95.6
XLOC_003555	NONMMUT033630.2	89.13	92	9	1	1718	1808	560	469	7e-18	95.6
XLOC_003556	NONMMUT045672.2	97.3	37	1	0	754	790	1009	973	4e-09	65.9
XLOC_003559	NONMMUT002115.2	90.32	62	5	1	1800	1861	1858	1798	1e-09	67.9
XLOC_003559	NONMMUT002115.2	90.32	62	5	1	1800	1861	1858	1798	1e-09	67.9
XLOC_003559	NONMMUT002115.2	90.32	62	5	1	1800	1861	1858	1798	1e-09	67.9
XLOC_003559	NONMMUT002115.2	90.32	62	5	1	1800	1861	1858	1798	2e-09	67.9
XLOC_003568	NONMMUT089699.1	91.43	35	3	0	260	294	2507	2541	0.0009	46.1
XLOC_003569	NONMMUT018939.2	100	23	0	0	6	28	6265	6287	0.0007	46.1
XLOC_003573	NONMMUT008416.2	100	26	0	0	737	762	2957	2982	4e-05	52
XLOC_003576	NONMMUT114317.1	100	25	0	0	268	292	731	755	7e-05	50.1
XLOC_003578	NONMMUT070345.2	89.58	48	5	0	185	232	67	20	4e-06	56
XLOC_003579	NONMMUT038442.2	93.48	184	10	2	41	224	596	777	5e-66	254
XLOC_003579	NONMMUT038442.2	93.48	184	10	2	41	224	596	777	6e-66	254
XLOC_003579	NONMMUT098512.1	92.98	57	3	1	521	577	4169	4114	2e-11	73.8
XLOC_003580	NONMMUT111185.1	100	25	0	0	427	451	577	601	0.0003	50.1
XLOC_003585	NONMMUT060806.2	96.43	28	1	0	28	55	341	314	0.0005	48.1
XLOC_003585	NONMMUT060806.2	96.43	28	1	0	28	55	341	314	0.0003	48.1
XLOC_003585	NONMMUT122916.1	94.44	36	2	0	775	810	2873	2908	2e-06	56
XLOC_003586	NONMMUT038516.2	100	34	0	0	299	332	151	118	3e-10	67.9
XLOC_003587	NONMMUT131181.1	100	29	0	0	782	810	1549	1521	5e-07	58
XLOC_003593	NONMMUT075574.1	96.55	29	1	0	763	791	5735	5763	0.0001	50.1
XLOC_003594	NONMMUT110495.1	100	24	0	0	35	58	1333	1356	0.0002	48.1
XLOC_003595	NONMMUT066410.2	93.75	48	2	1	683	730	718	764	7e-09	63.9
XLOC_003598	NONMMUT038810.2	91.88	308	23	1	779	1086	4389	4084	3e-111	406
XLOC_003598	NONMMUT038810.2	91.88	308	23	1	779	1086	4389	4084	3e-111	406
XLOC_003598	NONMMUT038810.2	91.88	308	23	1	779	1086	4389	4084	3e-111	406
XLOC_003598	NONMMUT038810.2	91.88	308	23	1	779	1086	4389	4084	3e-111	406
XLOC_003598	NONMMUT038810.2	91.88	308	23	1	779	1086	4389	4084	3e-111	406
XLOC_003599	NONMMUT100806.1	100	25	0	0	2346	2370	531	555	0.0006	50.1
XLOC_003599	NONMMUT044109.2	95.12	41	2	0	1388	1428	85	45	5e-09	65.9
XLOC_003602	NONMMUT038894.2	82.71	266	46	0	68	333	307	572	8e-39	163
XLOC_003603	NONMMUT038894.2	82.57	109	19	0	383	491	1149	1257	1e-09	65.9
XLOC_003605	NONMMUT038965.2	93.1	145	10	0	83	227	858	714	2e-52	208
XLOC_003605	NONMMUT038965.2	93.1	145	10	0	83	227	858	714	2e-52	208
XLOC_003606	NONMMUT069762.2	100	30	0	0	1386	1415	1677	1706	2e-07	60
XLOC_003609	NONMMUT122916.1	87.3	63	8	0	1552	1614	2846	2908	9e-08	61.9
XLOC_003610	NONMMUT034642.2	96.43	28	1	0	1519	1546	452	425	0.001	48.1
XLOC_003617	NONMMUT125153.1	88.61	158	14	1	107	264	404	251	6e-41	168
XLOC_003618	NONMMUT122670.1	92.11	38	3	0	10	47	1505	1468	2e-05	52
XLOC_003618	NONMMUT122670.1	92.11	38	3	0	10	47	1505	1468	2e-05	52
XLOC_003618	NONMMUT122670.1	92.11	38	3	0	10	47	1505	1468	2e-05	52
XLOC_003621	NONMMUT074763.2	88.71	62	6	1	381	442	1780	1720	1e-07	60
XLOC_003622	NONMMUT062841.2	96.43	28	1	0	72	99	1529	1556	0.0002	48.1
XLOC_003622	NONMMUT073099.2	93.33	45	3	0	503	547	2	46	1e-09	65.9
XLOC_003632	NONMMUT063184.2	91.91	272	20	1	155	426	270	1	5e-98	359
XLOC_003632	NONMMUT063184.2	91.91	272	20	1	151	422	270	1	5e-98	359
XLOC_003632	NONMMUT063184.2	91.91	272	20	1	33	304	270	1	4e-98	359
XLOC_003634	NONMMUT134020.1	100	24	0	0	81	104	539	516	0.0002	48.1
XLOC_003634	NONMMUT134020.1	100	24	0	0	81	104	539	516	0.0002	48.1
XLOC_003634	NONMMUT134020.1	100	24	0	0	81	104	539	516	0.0003	48.1
XLOC_003635	NONMMUT063147.2	89.89	89	9	0	124	212	2567	2655	1e-21	105
XLOC_003642	NONMMUT104744.1	94.59	37	2	0	1195	1231	51	87	1e-06	58
XLOC_003644	NONMMUT121578.1	97.44	39	1	0	105	143	660	698	1e-10	69.9
XLOC_003645	NONMMUT062960.2	93.33	90	6	0	93	182	880	791	1e-28	131
XLOC_003645	NONMMUT062960.2	93.33	90	6	0	93	182	880	791	1e-28	131
XLOC_003646	NONMMUT098512.1	94.74	38	2	0	76	113	4151	4114	7e-08	60
XLOC_003648	NONMMUT130518.1	96.55	29	1	0	21	49	291	263	6e-05	50.1
XLOC_003650	NONMMUT062909.2	84.7	268	29	1	440	695	757	490	5e-56	220
XLOC_003659	NONMMUT065566.2	81.37	102	19	0	729	830	1156	1257	6e-05	52
XLOC_003659	NONMMUT065566.2	81.37	102	19	0	946	1047	1156	1257	7e-05	52
XLOC_003659	NONMMUT065566.2	81.37	102	19	0	1071	1172	1156	1257	8e-05	52
XLOC_003659	NONMMUT065566.2	81.37	102	19	0	505	606	1156	1257	6e-05	52
XLOC_003662	NONMMUT056556.2	100	26	0	0	822	847	174	199	5e-05	52
XLOC_003664	NONMMUT125797.1	91.43	35	3	0	257	291	298	264	0.0008	46.1
XLOC_003672	NONMMUT135361.1	97.44	39	1	0	753	791	50	12	5e-10	69.9
XLOC_003673	NONMMUT062680.2	88.64	493	35	9	502	988	566	89	1e-125	452
XLOC_003673	NONMMUT062680.2	88.3	581	47	9	454	1028	566	1	1e-149	531
XLOC_003674	NONMMUT125573.1	93.94	33	2	0	324	356	217	185	8e-05	50.1
XLOC_003674	NONMMUT014466.2	90.48	42	4	0	110	151	256	297	5e-05	52
XLOC_003674	NONMMUT125573.1	93.94	33	2	0	82	114	217	185	4e-05	50.1
XLOC_003674	NONMMUT125573.1	93.94	33	2	0	522	554	217	185	0.0001	50.1
XLOC_003678	NONMMUT055258.2	86.57	67	8	1	419	485	80	15	6e-06	54
XLOC_003683	NONMMUT032692.2	89.8	49	5	0	196	244	68	20	1e-06	58
XLOC_003689	NONMMUT136269.1	92.31	52	3	1	597	648	1337	1287	2e-08	63.9
XLOC_003689	NONMMUT136269.1	92.31	52	3	1	597	648	1337	1287	2e-08	63.9
XLOC_003697	NONMMUT134445.1	100	26	0	0	111	136	827	802	7e-05	52
XLOC_003705	NONMMUT132533.1	89.18	194	21	0	133	326	494	301	8e-56	218
XLOC_003705	NONMMUT132533.1	85.85	106	15	0	133	238	326	221	1e-17	91.7
XLOC_003713	NONMMUT132500.1	93.02	86	6	0	525	610	232	147	7e-27	123
XLOC_003713	NONMMUT068968.2	91.94	62	3	1	467	526	129	68	6e-13	77.8
XLOC_003713	NONMMUT068890.2	94.29	35	2	0	870	904	4319	4353	8e-06	54
XLOC_003713	NONMMUT132500.1	93.02	86	6	0	1182	1267	232	147	1e-26	123
XLOC_003713	NONMMUT132500.1	93.02	86	6	0	1302	1387	232	147	2e-26	123
XLOC_003713	NONMMUT132498.1	95.9	122	5	0	1546	1667	170	49	3e-50	202
XLOC_003713	NONMMUT132500.1	93.02	86	6	0	1827	1912	232	147	2e-26	123
XLOC_003713	NONMMUT132500.1	93.02	86	6	0	1669	1754	232	147	2e-26	123
XLOC_003713	NONMMUT068968.2	91.8	61	3	1	1194	1252	128	68	4e-12	75.8
XLOC_003713	NONMMUT132499.1	95.35	43	2	0	43	85	171	129	4e-11	69.9
XLOC_003718	NONMMUT086933.1	92.16	51	3	1	322	372	851	802	1e-08	61.9
XLOC_003723	NONMMUT068855.2	92.82	195	14	0	454	648	714	908	1e-72	276
XLOC_003725	NONMMUT055409.2	95.45	44	2	0	1109	1152	22	65	6e-11	71.9
XLOC_003725	NONMMUT055409.2	95.45	44	2	0	1109	1152	22	65	8e-11	71.9
XLOC_003725	NONMMUT122916.1	95	40	2	0	1409	1448	2871	2910	2e-08	63.9
XLOC_003732	NONMMUT132397.1	88.68	106	12	0	219	324	108	3	1e-24	115
XLOC_003734	NONMMUT122916.1	97.3	37	1	0	257	293	2908	2872	7e-10	65.9
XLOC_003735	NONMMUT100516.1	80.73	109	21	0	141	249	5125	5017	0.0002	50.1
XLOC_003736	NONMMUT040289.2	95.24	42	2	0	574	615	1186	1227	6e-10	67.9
XLOC_003738	NONMMUT048823.2	90.2	51	4	1	792	842	119	168	2e-05	54
XLOC_003745	NONMMUT002115.2	92.31	52	3	1	1978	2029	1808	1858	2e-08	63.9
XLOC_003747	NONMMUT134083.1	97.56	82	2	0	155	236	4213	4294	2e-34	147
XLOC_003748	NONMMUT068541.2	82.96	405	44	8	165	549	428	29	6e-58	226
XLOC_003748	NONMMUT068541.2	82.89	409	45	8	664	1052	432	29	1e-57	226
XLOC_003748	NONMMUT068541.2	82.89	409	45	8	664	1052	432	29	1e-57	226
XLOC_003748	NONMMUT068541.2	82.89	409	45	8	664	1052	432	29	1e-57	226
XLOC_003748	NONMMUT068541.2	82.96	405	44	8	306	690	428	29	9e-58	226
XLOC_003748	NONMMUT068541.2	82.88	403	44	8	167	549	426	29	1e-56	222
XLOC_003748	NONMMUT068541.2	83.03	442	49	9	242	663	464	29	4e-63	244
XLOC_003748	NONMMUT068541.2	82.88	403	44	8	37	419	426	29	1e-56	222
XLOC_003748	NONMMUT068541.2	82.88	403	44	8	37	419	426	29	9e-57	222
XLOC_003748	NONMMUT068541.2	83.03	442	49	9	865	1286	464	29	7e-63	244
XLOC_003748	NONMMUT068541.2	83.03	442	49	9	865	1286	464	29	7e-63	244
XLOC_003752	NONMMUT125574.1	100	25	0	0	106	130	1831	1807	0.0002	50.1
XLOC_003753	NONMMUT064781.2	100	24	0	0	647	670	293	316	0.0004	48.1
XLOC_003757	NONMMUT121578.1	97.14	35	1	0	2531	2565	664	698	1e-07	61.9
XLOC_003758	NONMMUT132229.1	89.62	106	11	0	536	641	777	672	7e-27	123
XLOC_003763	NONMMUT068430.2	92.65	68	5	0	531	598	302	235	2e-18	95.6
XLOC_003763	NONMMUT068430.2	92.42	66	5	0	102	167	300	235	2e-17	91.7
XLOC_003763	NONMMUT068430.2	92.42	66	5	0	102	167	300	235	3e-17	91.7
XLOC_003763	NONMMUT068430.2	92.42	66	5	0	102	167	300	235	3e-17	91.7
XLOC_003768	NONMMUT032692.2	91.23	57	5	0	5650	5706	73	17	1e-10	73.8
XLOC_003768	NONMMUT032692.2	91.23	57	5	0	1310	1366	73	17	5e-11	73.8
XLOC_003774	NONMMUT070345.2	89.55	67	7	0	452	518	67	1	8e-13	77.8
XLOC_003774	NONMMUT070345.2	89.55	67	7	0	384	450	67	1	6e-13	77.8
XLOC_003779	NONMMUT036290.2	88.63	422	48	0	178	599	527	948	1e-126	456
XLOC_003779	NONMMUT036290.2	88.86	431	48	0	463	893	527	957	8e-132	474
XLOC_003779	NONMMUT036290.2	88.86	431	48	0	672	1102	527	957	8e-132	474
XLOC_003781	NONMMUT135361.1	92.31	65	4	1	151	215	71	8	2e-14	81.8
XLOC_003783	NONMMUT134532.1	93.22	59	3	1	542	600	883	826	7e-13	77.8
XLOC_003783	NONMMUT134532.1	93.22	59	3	1	655	713	883	826	8e-13	77.8
XLOC_003791	NONMMUT071745.2	93.94	33	2	0	566	598	109	77	8e-05	50.1
XLOC_003795	NONMMUT087408.1	100	25	0	0	698	722	851	875	0.0001	50.1
XLOC_003798	NONMMUT004735.2	100	23	0	0	239	261	530	508	0.0009	46.1
XLOC_003801	NONMMUT096553.1	94.74	38	2	0	1702	1739	408	371	3e-07	60
XLOC_003801	NONMMUT096553.1	94.74	38	2	0	1705	1742	408	371	3e-07	60
XLOC_003801	NONMMUT096553.1	94.74	38	2	0	1303	1340	408	371	2e-07	60
XLOC_003801	NONMMUT096553.1	94.74	38	2	0	1692	1729	408	371	3e-07	60
XLOC_003801	NONMMUT096553.1	94.74	38	2	0	1207	1244	408	371	2e-07	60
XLOC_003802	NONMMUT070345.2	97.37	38	1	0	1335	1372	20	57	1e-09	67.9
XLOC_003805	NONMMUT108995.1	90.74	108	9	1	48	155	99	205	3e-28	127
XLOC_003808	NONMMUT036927.2	98.16	869	10	2	66	934	677	1539	0	1588
XLOC_003810	NONMMUT106641.1	96.43	28	1	0	79	106	248	221	0.0003	48.1
XLOC_003813	NONMMUT034977.2	93.18	44	3	0	243	286	983	1026	3e-08	63.9
XLOC_003814	NONMMUT116819.1	87.76	147	17	1	261	406	1412	1558	2e-32	141
XLOC_003815	NONMMUT098279.1	100	23	0	0	173	195	30	8	0.0006	46.1
XLOC_003816	NONMMUT110802.1	96.3	27	1	0	217	243	3479	3453	0.0009	46.1
XLOC_003819	NONMMUT016115.2	82.12	151	27	0	1535	1685	183	33	1e-14	85.7
XLOC_003819	NONMMUT016115.2	82.12	151	27	0	1429	1579	183	33	1e-14	85.7
XLOC_003819	NONMMUT016115.2	82.12	151	27	0	1322	1472	183	33	1e-14	85.7
XLOC_003819	NONMMUT016115.2	82.12	151	27	0	1325	1475	183	33	1e-14	85.7
XLOC_003819	NONMMUT016115.2	82.12	151	27	0	1251	1401	183	33	1e-14	85.7
XLOC_003819	NONMMUT016115.2	82.12	151	27	0	1112	1262	183	33	1e-14	85.7
XLOC_003820	NONMMUT047556.2	86.15	65	9	0	105	169	113	177	8e-07	58
XLOC_003820	NONMMUT047556.2	86.15	65	9	0	105	169	113	177	3e-07	58
XLOC_003820	NONMMUT047556.2	86.15	65	9	0	67	131	113	177	7e-07	58
XLOC_003820	NONMMUT047556.2	86.15	65	9	0	372	436	113	177	6e-07	58
XLOC_003820	NONMMUT047556.2	86.15	65	9	0	103	167	113	177	3e-07	58
XLOC_003822	NONMMUT094828.1	96.97	33	1	0	418	450	1121	1153	6e-07	58
XLOC_003828	NONMMUT074114.2	86	100	14	0	266	365	1	100	2e-16	87.7
XLOC_003829	NONMMUT047399.2	85.28	299	36	2	4531	4821	2021	2319	4e-61	240
XLOC_003829	NONMMUT047399.2	85.28	299	36	2	2410	2700	2021	2319	2e-61	240
XLOC_003831	NONMMUT102459.1	100	24	0	0	323	346	1724	1701	0.0004	48.1
XLOC_003831	NONMMUT102459.1	100	24	0	0	332	355	1724	1701	0.0004	48.1
XLOC_003835	NONMMUT032692.2	92.11	38	3	0	1366	1403	20	57	5e-05	52
XLOC_003837	NONMMUT116670.1	100	42	0	0	1	42	1174	1215	1e-14	83.8
XLOC_003843	NONMMUT047118.2	83.33	72	12	0	377	448	1	72	0.0003	48.1
XLOC_003843	NONMMUT047118.2	83.33	72	12	0	360	431	1	72	0.0003	48.1
XLOC_003845	NONMMUT056845.2	96.3	27	1	0	119	145	170	144	0.0007	46.1
XLOC_003846	NONMMUT070345.2	91.38	58	5	0	556	613	10	67	4e-12	75.8
XLOC_003848	NONMMUT067179.2	86.57	67	9	0	501	567	1	67	3e-08	61.9
XLOC_003849	NONMMUT102445.1	93.75	48	2	1	994	1041	1259	1305	4e-08	63.9
XLOC_003850	NONMMUT103281.1	92.11	38	3	0	749	786	279	242	5e-05	52
XLOC_003856	NONMMUT046713.2	82.22	433	42	8	6406	6834	3564	3965	2e-60	238
XLOC_003869	NONMMUT130865.1	100	25	0	0	231	255	69	93	0.0001	50.1
XLOC_003872	NONMMUT047888.2	90	50	5	0	438	487	2593	2642	2e-07	60
XLOC_003873	NONMMUT134386.1	87.69	65	7	1	1095	1159	1652	1589	7e-07	58
XLOC_003873	NONMMUT134386.1	87.69	65	7	1	816	880	1652	1589	6e-07	58
XLOC_003876	NONMMUT070345.2	91.49	47	4	0	1813	1859	10	56	2e-07	61.9
XLOC_003877	NONMMUT055409.2	89.8	49	5	0	1255	1303	19	67	1e-06	58
XLOC_003878	NONMMUT135982.1	93.94	33	2	0	693	725	4218	4186	0.0004	50.1
XLOC_003878	NONMMUT135982.1	93.94	33	2	0	238	270	4218	4186	5e-05	50.1
XLOC_003878	NONMMUT135982.1	93.94	33	2	0	236	268	4218	4186	4e-05	50.1
XLOC_003882	NONMMUT064447.2	100	25	0	0	287	311	449	473	8e-05	50.1
XLOC_003887	NONMMUT014695.2	87.76	49	6	0	1713	1761	1708	1756	0.0004	50.1
XLOC_003887	NONMMUT014695.2	87.76	49	6	0	938	986	1708	1756	0.0003	50.1
XLOC_003887	NONMMUT014695.2	87.76	49	6	0	596	644	1708	1756	0.0002	50.1
XLOC_003891	NONMMUT068513.2	92.31	39	3	0	1098	1136	2122	2084	1e-05	54
XLOC_003891	NONMMUT068513.2	92.31	39	3	0	965	1003	2122	2084	9e-06	54
XLOC_003891	NONMMUT068513.2	92.31	39	3	0	1561	1599	2122	2084	1e-05	54
XLOC_003891	NONMMUT068513.2	92.31	39	3	0	1104	1142	2122	2084	1e-05	54
XLOC_003899	NONMMUT056729.2	86.67	60	8	0	168	227	1670	1611	2e-06	56
XLOC_003911	NONMMUT030751.2	100	24	0	0	316	339	639	616	0.0002	48.1
XLOC_003915	NONMMUT092509.1	90.91	55	4	1	500	554	135	188	5e-08	61.9
XLOC_003918	NONMMUT034916.2	92.5	40	3	0	861	900	1321	1282	2e-06	56
XLOC_003918	NONMMUT034916.2	92.5	40	3	0	906	945	1321	1282	2e-06	56
XLOC_003925	NONMMUT028199.2	87.27	55	7	0	1402	1456	1201	1255	1e-05	54
XLOC_003927	NONMMUT129706.1	100	24	0	0	91	114	837	814	0.0009	48.1
XLOC_003927	NONMMUT129706.1	100	24	0	0	86	109	837	814	0.0009	48.1
XLOC_003927	NONMMUT129706.1	100	24	0	0	59	82	837	814	0.001	48.1
XLOC_003927	NONMMUT129706.1	100	24	0	0	59	82	837	814	0.0009	48.1
XLOC_003927	NONMMUT132715.1	92.16	51	3	1	90	140	1314	1363	6e-08	61.9
XLOC_003928	NONMMUT056353.2	88.68	53	6	0	99	151	1277	1225	3e-07	58
XLOC_003932	NONMMUT091874.1	89.36	47	5	0	137	183	324	278	6e-06	54
XLOC_003933	NONMMUT091854.1	94.29	35	2	0	1988	2022	244	210	2e-05	54
XLOC_003939	NONMMUT108879.1	96.3	27	1	0	129	155	205	231	0.0006	46.1
XLOC_003941	NONMMUT036417.2	87.02	262	34	0	1088	1349	1123	862	2e-64	250
XLOC_003942	NONMMUT070345.2	87.88	66	8	0	94	159	76	11	5e-10	67.9
XLOC_003942	NONMMUT070345.2	87.88	66	8	0	94	159	76	11	6e-10	67.9
XLOC_003942	NONMMUT114317.1	100	27	0	0	43	69	757	731	3e-06	54
XLOC_003943	NONMMUT032420.2	89.47	57	6	0	116	172	57	1	5e-09	65.9
XLOC_003943	NONMMUT032420.2	89.47	57	6	0	116	172	57	1	4e-09	65.9
XLOC_003945	NONMMUT129999.1	92.68	41	3	0	175	215	104	144	4e-07	58
XLOC_003945	NONMMUT129999.1	92.68	41	3	0	175	215	104	144	3e-07	58
XLOC_003945	NONMMUT129999.1	92.68	41	3	0	175	215	104	144	5e-07	58
XLOC_003951	NONMMUT025771.2	100	24	0	0	12	35	2854	2831	0.0003	48.1
XLOC_003951	NONMMUT025771.2	100	24	0	0	12	35	2854	2831	0.0002	48.1
XLOC_003953	NONMMUT087360.1	90.57	53	5	0	1272	1324	539	591	3e-09	65.9
XLOC_003955	NONMMUT124020.1	90.2	51	5	0	918	968	3339	3289	9e-08	61.9
XLOC_003957	NONMMUT062482.2	81.59	554	82	12	3015	3566	134	669	3e-52	210
XLOC_003961	NONMMUT045672.2	91.38	58	4	1	986	1043	1026	970	3e-09	67.9
XLOC_003961	NONMMUT045672.2	91.38	58	4	1	986	1043	1026	970	4e-09	67.9
XLOC_003961	NONMMUT045672.2	91.38	58	4	1	986	1043	1026	970	3e-09	67.9
XLOC_003963	NONMMUT110295.1	100	27	0	0	757	783	241	267	1e-05	54
XLOC_003963	NONMMUT110295.1	100	27	0	0	757	783	241	267	1e-05	54
XLOC_003963	NONMMUT110295.1	100	27	0	0	757	783	241	267	1e-05	54
XLOC_003969	NONMMUT121578.1	92	50	4	0	11	60	709	660	3e-10	67.9
XLOC_003972	NONMMUT047517.2	92.17	115	4	3	34	144	492	379	3e-30	137
XLOC_003976	NONMMUT047306.2	85.56	457	61	4	1182	1636	595	142	2e-95	353
XLOC_003982	NONMMUT020806.2	96.97	33	1	0	485	517	743	711	2e-06	58
XLOC_003985	NONMMUT054322.2	96.67	30	1	0	795	824	1736	1707	7e-05	52
XLOC_003987	NONMMUT047465.2	83.64	214	34	1	45	258	238	26	5e-32	139
XLOC_003989	NONMMUT009657.2	97.06	34	1	0	681	714	2130	2163	6e-07	60
XLOC_003992	NONMMUT109656.1	100	28	0	0	2185	2212	488	515	5e-06	56
XLOC_003992	NONMMUT109656.1	100	28	0	0	2177	2204	488	515	5e-06	56
XLOC_003992	NONMMUT109656.1	100	28	0	0	2208	2235	488	515	5e-06	56
XLOC_003992	NONMMUT109656.1	100	28	0	0	2182	2209	488	515	5e-06	56
XLOC_003992	NONMMUT131734.1	92.98	57	3	1	625	681	12958	13013	2e-11	73.8
XLOC_003992	NONMMUT131734.1	92.98	57	3	1	625	681	12958	13013	2e-11	73.8
XLOC_003992	NONMMUT131734.1	92.98	57	3	1	625	681	12958	13013	2e-11	73.8
XLOC_003992	NONMMUT131734.1	92.98	57	3	1	625	681	12958	13013	2e-11	73.8
XLOC_003992	NONMMUT131734.1	92.98	57	3	1	625	681	12958	13013	2e-11	73.8
XLOC_003992	NONMMUT131734.1	92.98	57	3	1	625	681	12958	13013	2e-11	73.8
XLOC_003992	NONMMUT131734.1	92.98	57	3	1	625	681	12958	13013	2e-11	73.8
XLOC_004005	NONMMUT047503.2	89.06	64	7	0	400	463	164	227	2e-11	71.9
XLOC_004007	NONMMUT047968.2	90.91	99	9	0	21	119	3238	3336	6e-28	125
XLOC_004008	NONMMUT065758.2	89.23	130	14	0	59	188	1211	1340	5e-34	147
XLOC_004009	NONMMUT047875.2	88.03	142	14	3	437	576	141	1	8e-27	123
XLOC_004009	NONMMUT047875.2	88.03	142	14	3	517	656	141	1	8e-27	123
XLOC_004009	NONMMUT047875.2	88.03	142	14	3	293	432	141	1	6e-27	123
XLOC_004011	NONMMUT008099.2	100	28	0	0	28	55	2068	2095	8e-07	56
XLOC_004014	NONMMUT034383.2	96.97	99	3	0	280	378	616	518	5e-42	172
XLOC_004014	NONMMUT034383.2	92.92	113	8	0	129	241	4028	3916	5e-38	161
XLOC_004014	NONMMUT034383.2	93.52	108	7	0	88	195	4023	3916	2e-37	159
XLOC_004021	NONMMUT067179.2	93.33	45	3	0	334	378	23	67	5e-09	65.9
XLOC_004021	NONMMUT067179.2	93.33	45	3	0	334	378	23	67	5e-09	65.9
XLOC_004021	NONMMUT067179.2	93.33	45	3	0	334	378	23	67	4e-09	65.9
XLOC_004021	NONMMUT067179.2	93.33	45	3	0	334	378	23	67	4e-09	65.9
XLOC_004021	NONMMUT067179.2	93.33	45	3	0	334	378	23	67	4e-09	65.9
XLOC_004021	NONMMUT113513.1	100	28	0	0	325	352	828	801	2e-06	56
XLOC_004035	NONMMUT000091.2	91.26	206	16	2	699	902	1	206	7e-65	250
XLOC_004035	NONMMUT000091.2	91.26	206	16	2	699	902	1	206	1e-64	250
XLOC_004036	NONMMUT035377.2	92	50	3	1	17	66	2797	2749	5e-08	60
XLOC_004037	NONMMUT058913.2	90	40	4	0	1311	1350	7562	7601	0.0007	48.1
XLOC_004037	NONMMUT058913.2	90	40	4	0	1318	1357	7562	7601	0.0008	48.1
XLOC_004041	NONMMUT129999.1	93.88	49	2	1	5	53	94	141	2e-09	65.9
XLOC_004042	NONMMUT017487.2	93.75	32	2	0	78	109	981	950	0.0006	48.1
XLOC_004044	NONMMUT094877.1	100	23	0	0	25	47	3452	3474	0.001	46.1
XLOC_004051	NONMMUT017999.2	80.65	372	62	1	127	498	377	16	6e-43	176
XLOC_004054	NONMMUT068960.2	88.89	63	6	1	493	555	1451	1390	5e-08	61.9
XLOC_004054	NONMMUT097473.1	100	24	0	0	399	422	540	563	0.0002	48.1
XLOC_004054	NONMMUT068960.2	88.89	63	6	1	437	499	1451	1390	2e-08	61.9
XLOC_004054	NONMMUT068960.2	88.89	63	6	1	465	527	1451	1390	5e-08	61.9
XLOC_004054	NONMMUT068960.2	88.89	63	6	1	544	606	1451	1390	5e-08	61.9
XLOC_004054	NONMMUT068960.2	88.89	63	6	1	503	565	1451	1390	4e-08	61.9
XLOC_004055	NONMMUT116304.1	92.98	57	3	1	1	57	4678	4733	6e-12	73.8
XLOC_004055	NONMMUT116304.1	92.98	57	3	1	1	57	4678	4733	6e-12	73.8
XLOC_004055	NONMMUT116304.1	92.98	57	3	1	1	57	4678	4733	6e-12	73.8
XLOC_004055	NONMMUT116304.1	92.98	57	3	1	1	57	4678	4733	7e-12	73.8
[truncated: 3,928 more rows]

## Sheet: Rhesus
LncRNA	Rhesus_LncRNA	Identity	Length	Mismatch	Gap	Q_start	Q_end	O_start	O_end	E-value	Score
[truncated: 9,413 more rows]
