# Supplementary figures and images for: Annotation and cluster analysis of spatiotemporal- and sex-related lncRNA expression in rhesus macaque brain
Source: HighWire-hosted journal article supplement (doi:10.1101/gr.217463.116), 2017-07-07

# Cluster Dendrogram

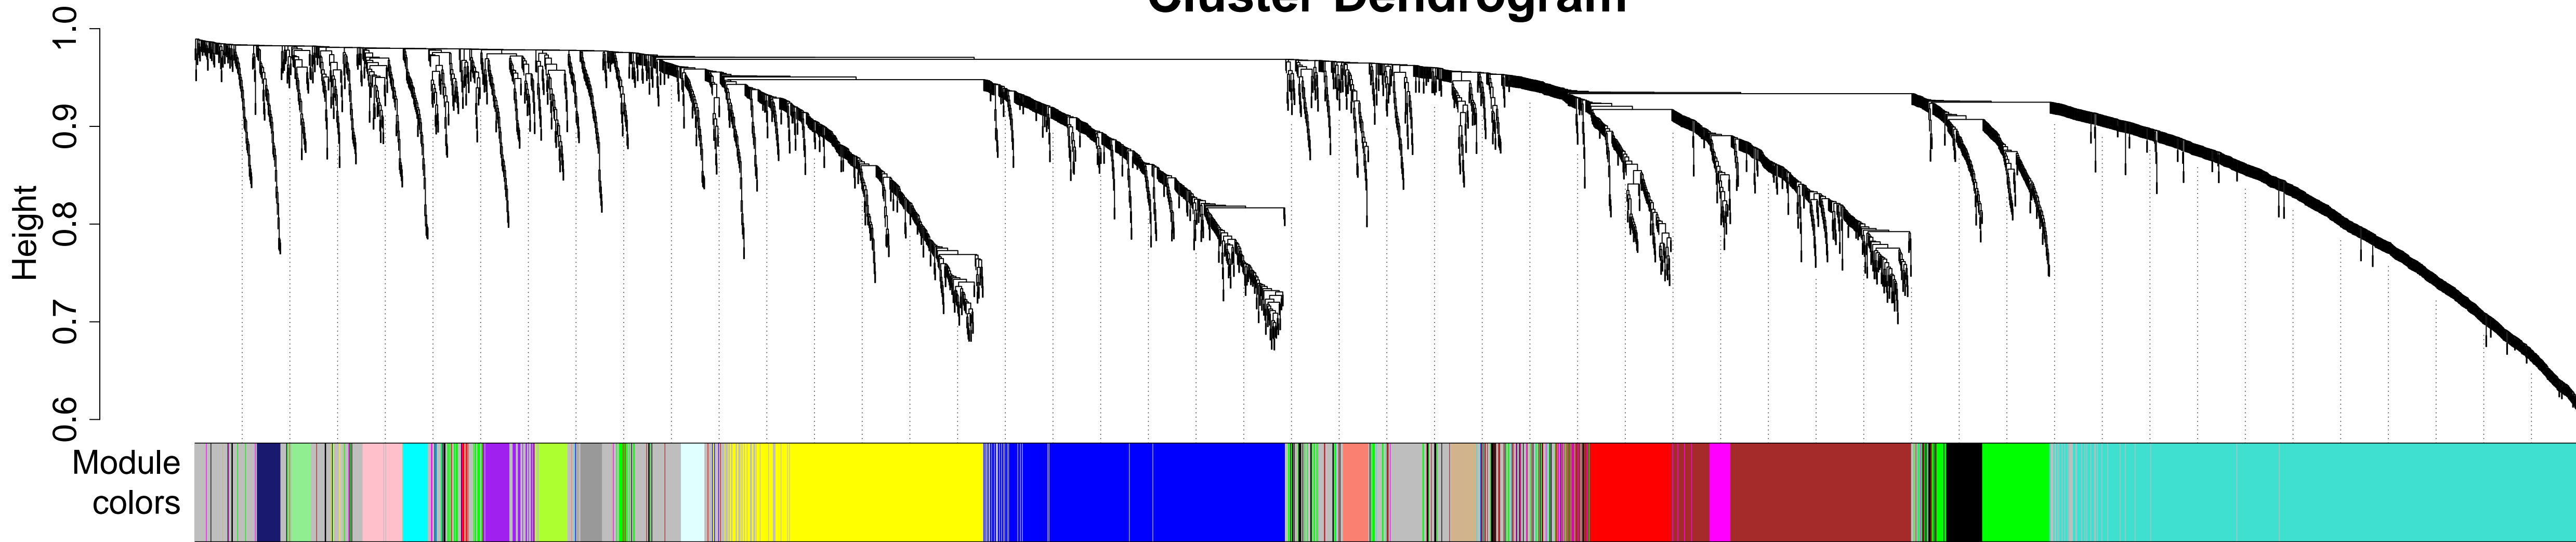

Supplement: Supplemental_Material.tar.gz [file Dendrogram_and_module_colors.pdf › Supplemental_Material/LncRNA_modules/Dendrogram_and_module_colors.pdf]

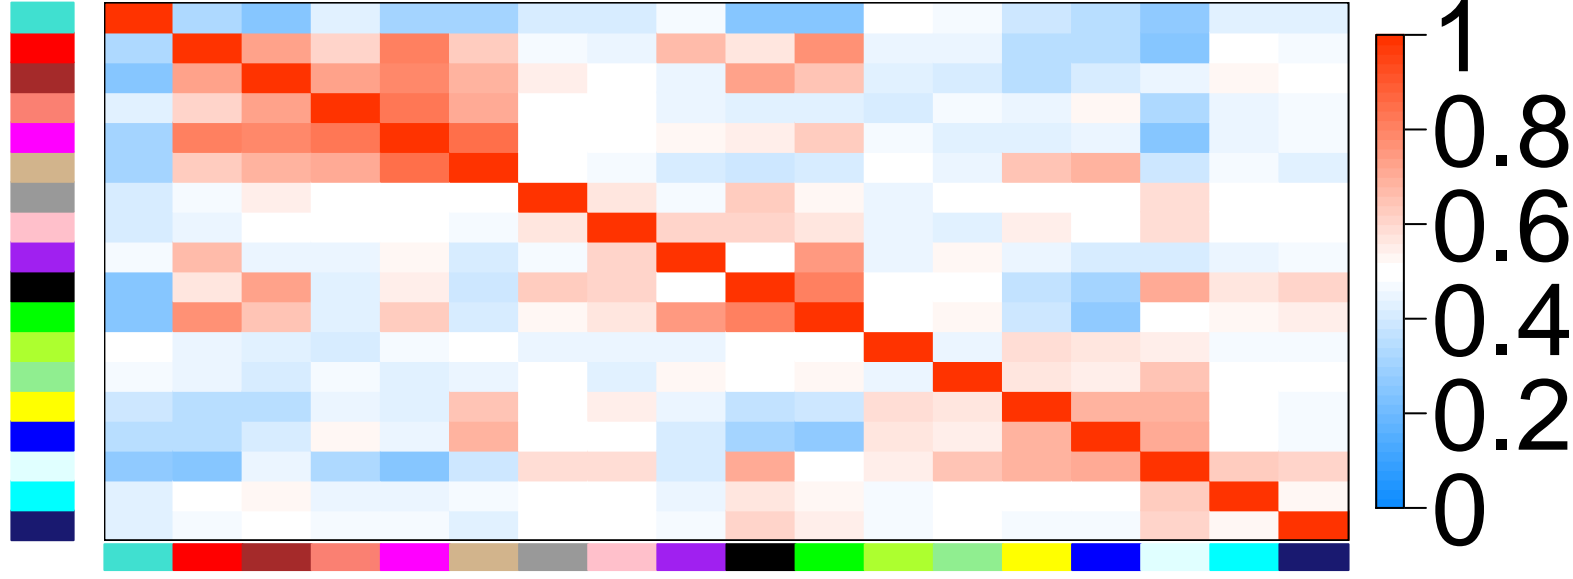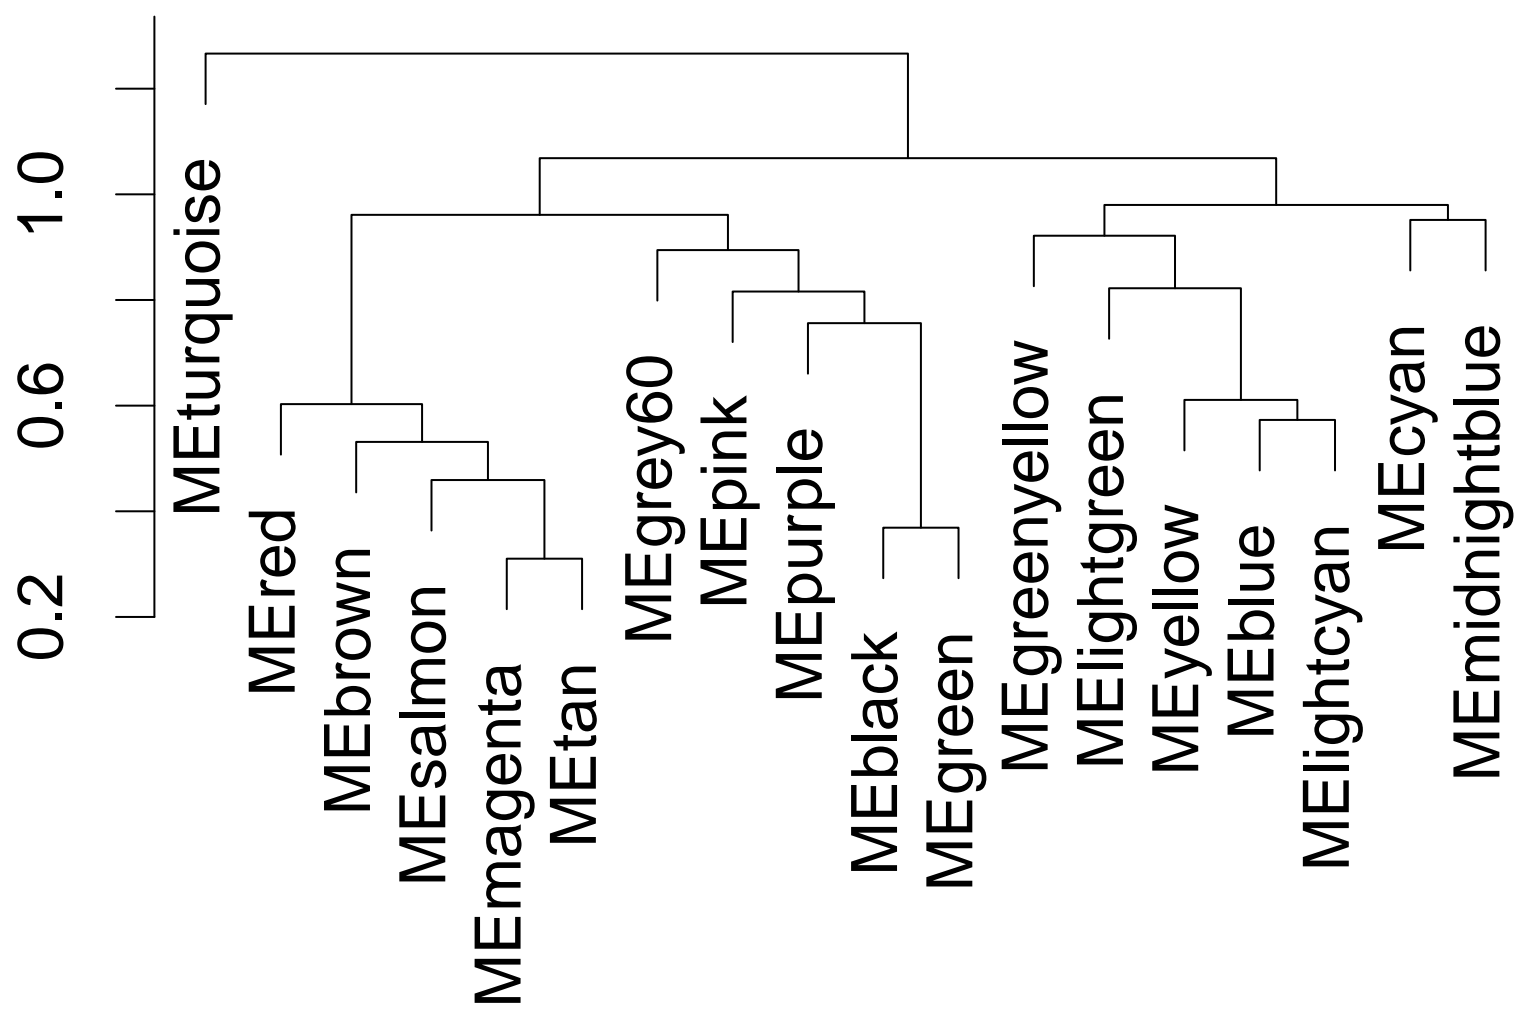

Supplement: Supplemental_Material.tar.gz [file Eigengene_dendrogram_heatmap.pdf › Supplemental_Material/LncRNA_modules/Eigengene_dendrogram_heatmap.pdf]

# Module bar plot

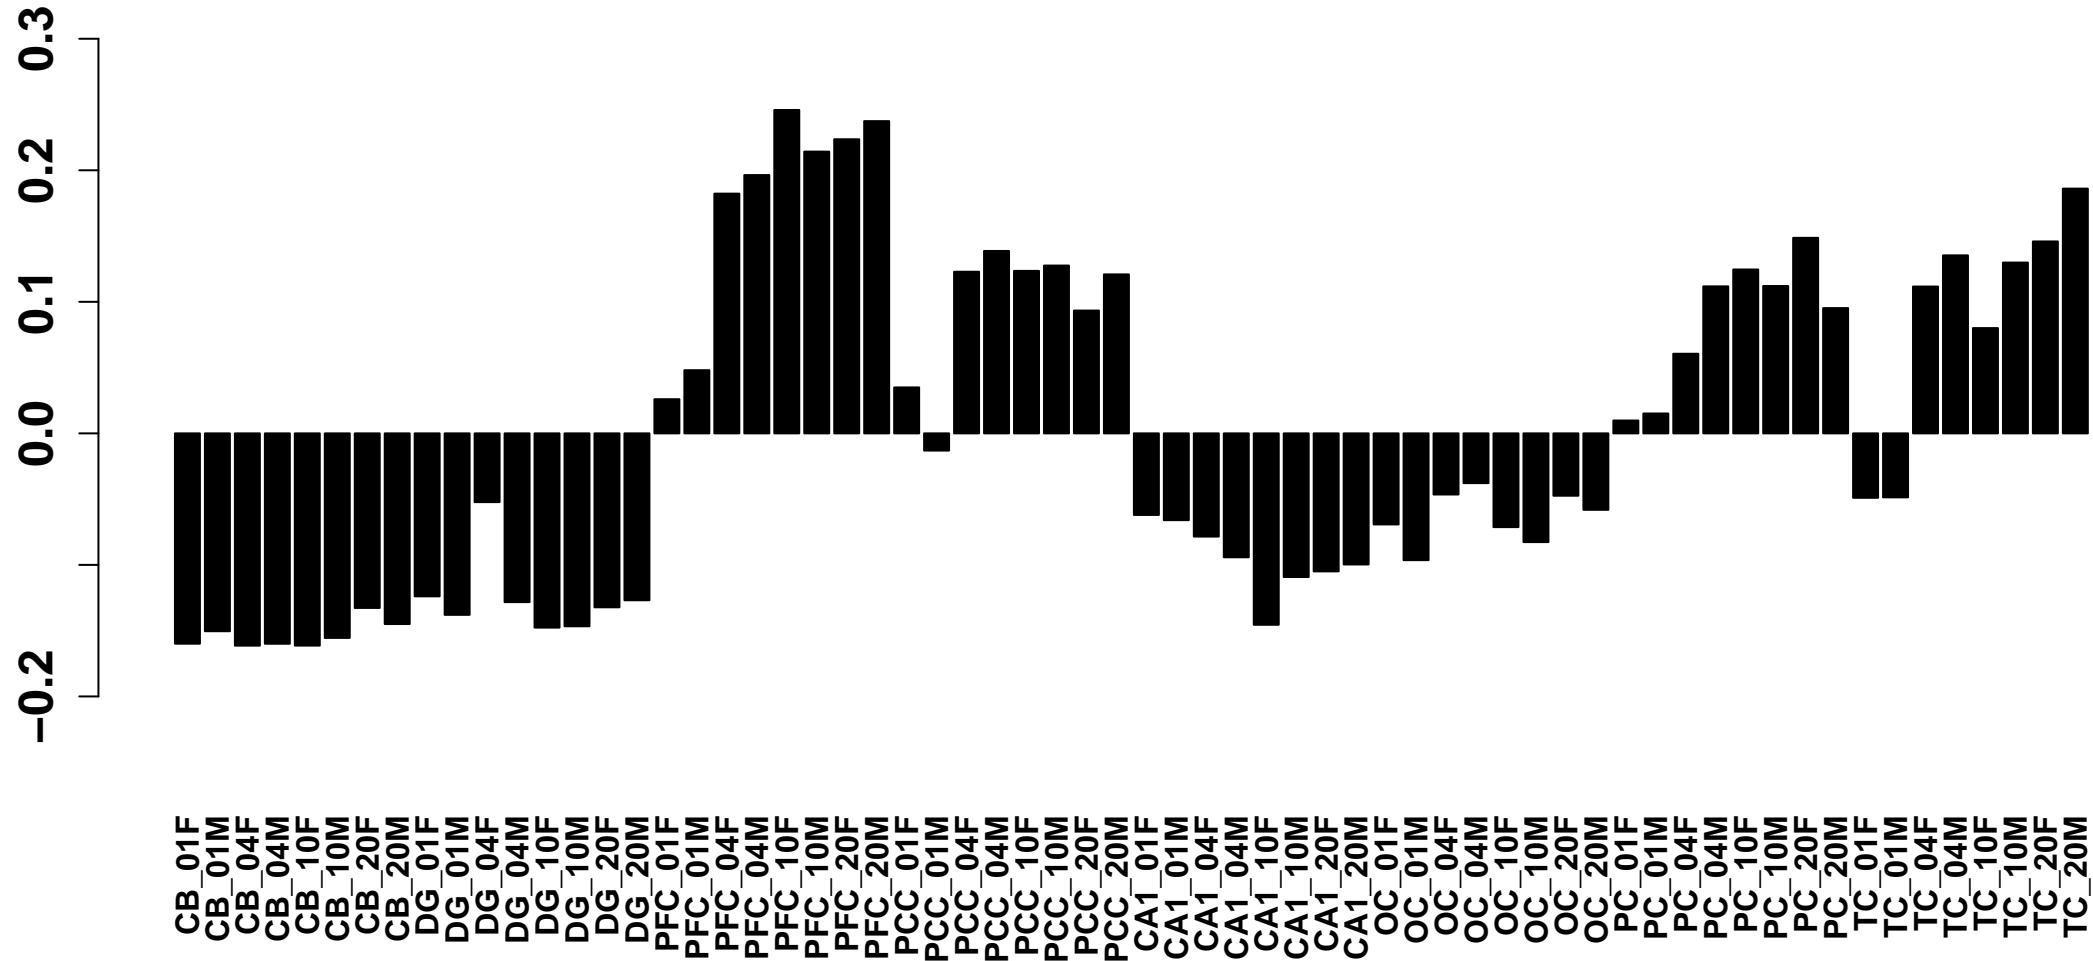

Supplement: Supplemental_Material.tar.gz [file MEblack_bar_plot.pdf › Supplemental_Material/LncRNA_modules/MEblack_bar_plot.pdf]

# Module bar plot

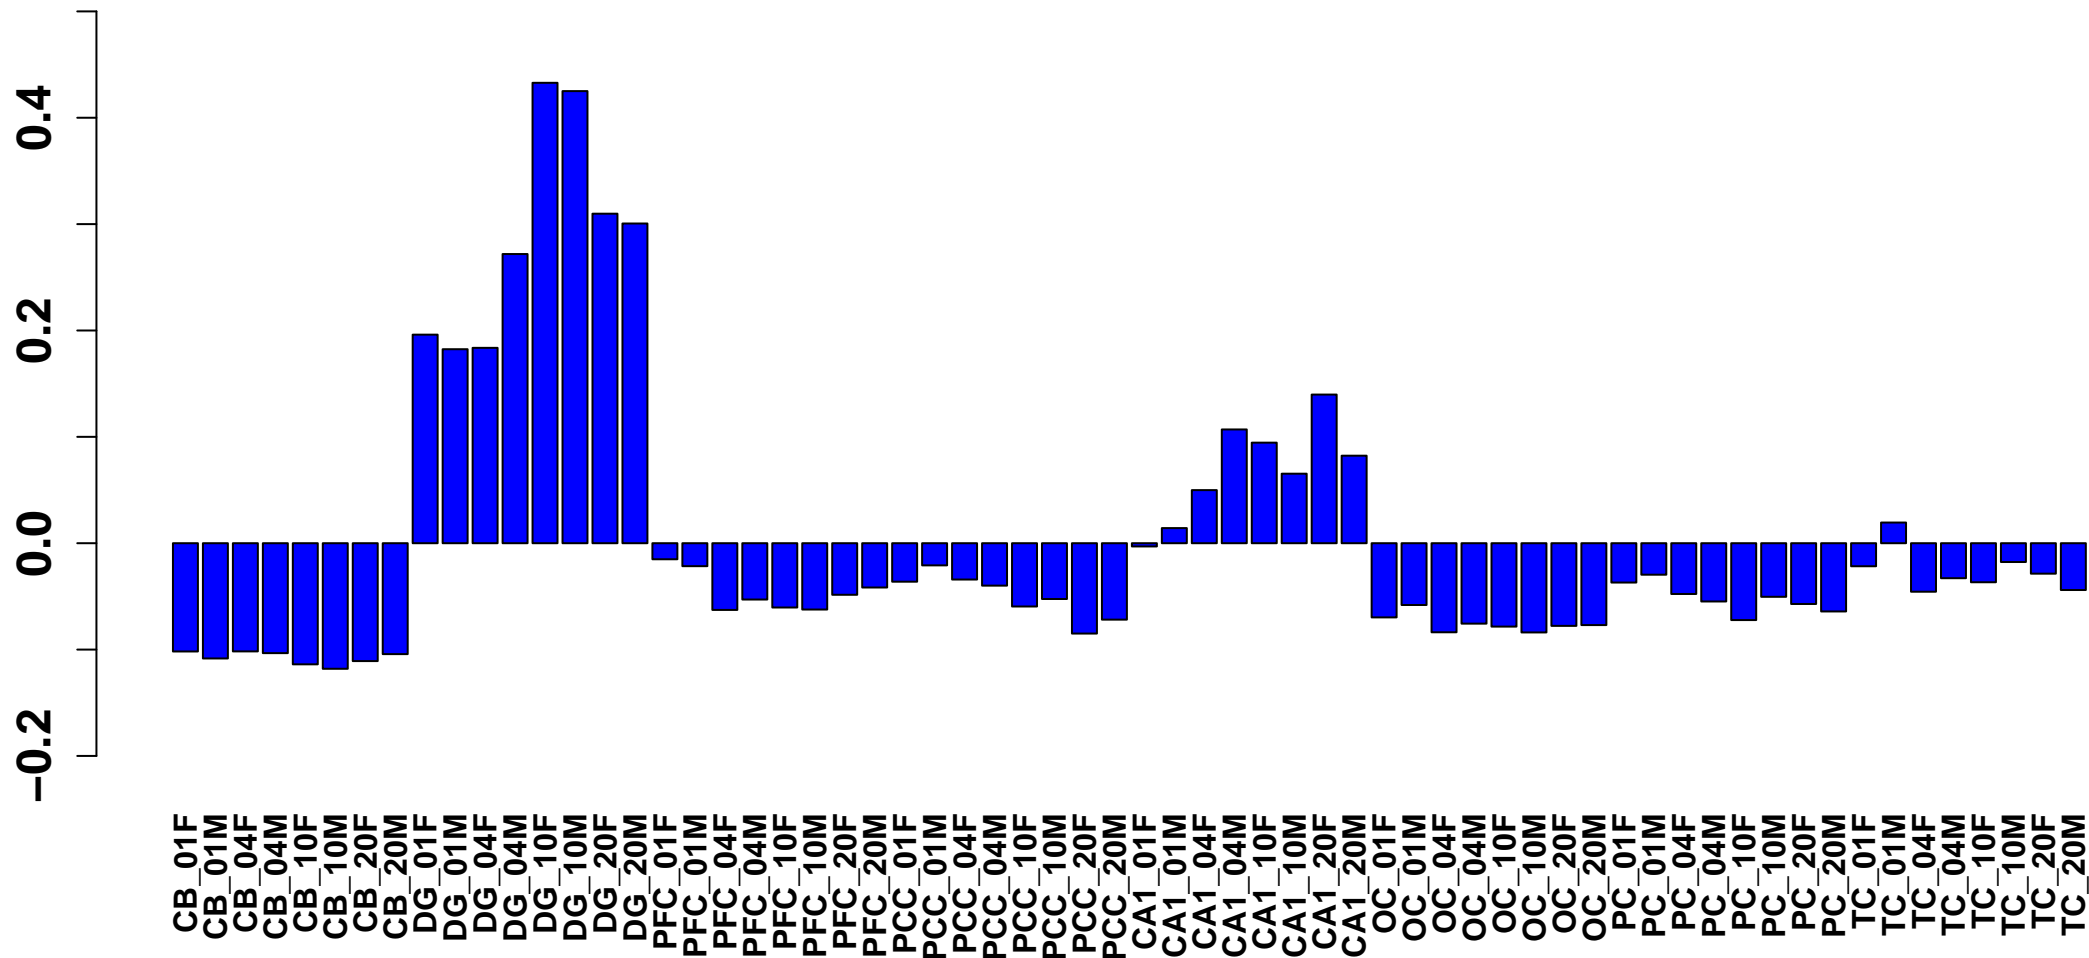

Supplement: Supplemental_Material.tar.gz [file MEblue_bar_plot.pdf › Supplemental_Material/LncRNA_modules/MEblue_bar_plot.pdf]

# Module bar plot

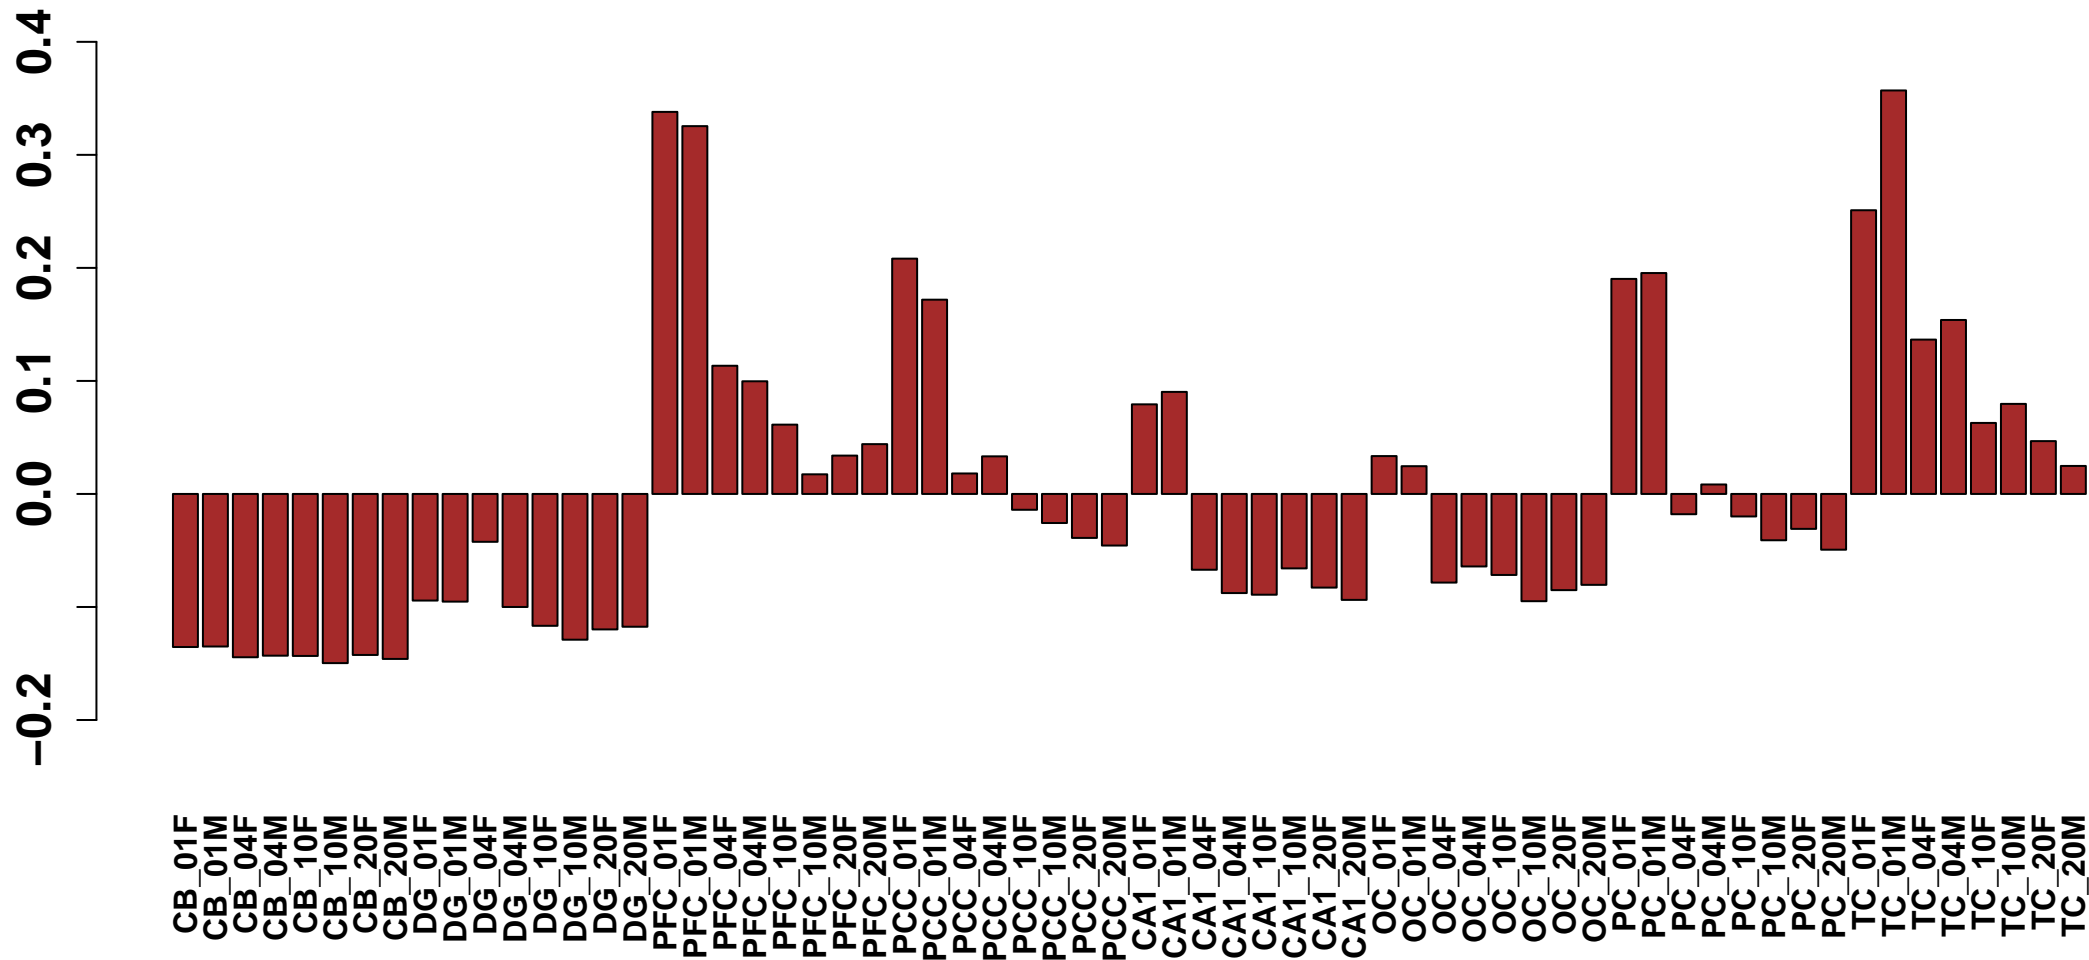

Supplement: Supplemental_Material.tar.gz [file MEbrown_bar_plot.pdf › Supplemental_Material/LncRNA_modules/MEbrown_bar_plot.pdf]

# Module bar plot

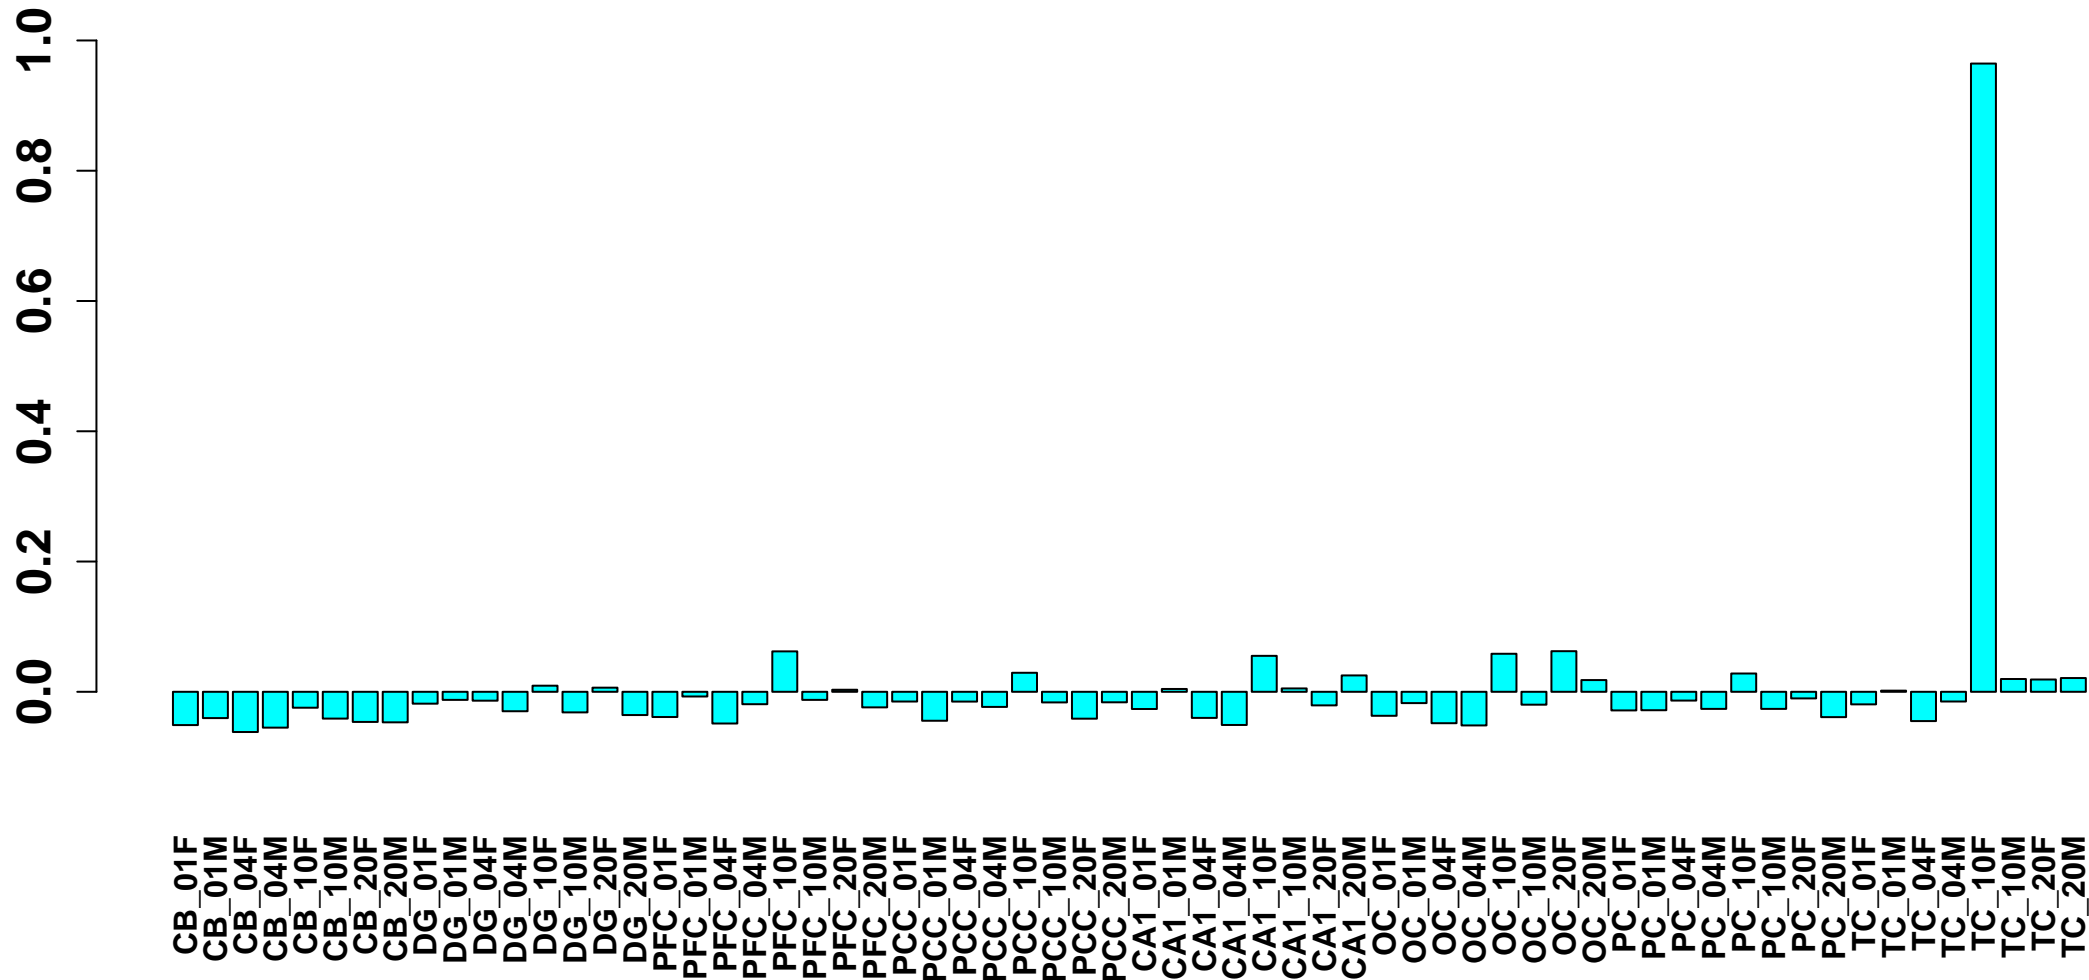

Supplement: Supplemental_Material.tar.gz [file MEcyan_bar_plot.pdf › Supplemental_Material/LncRNA_modules/MEcyan_bar_plot.pdf]

# Module bar plot

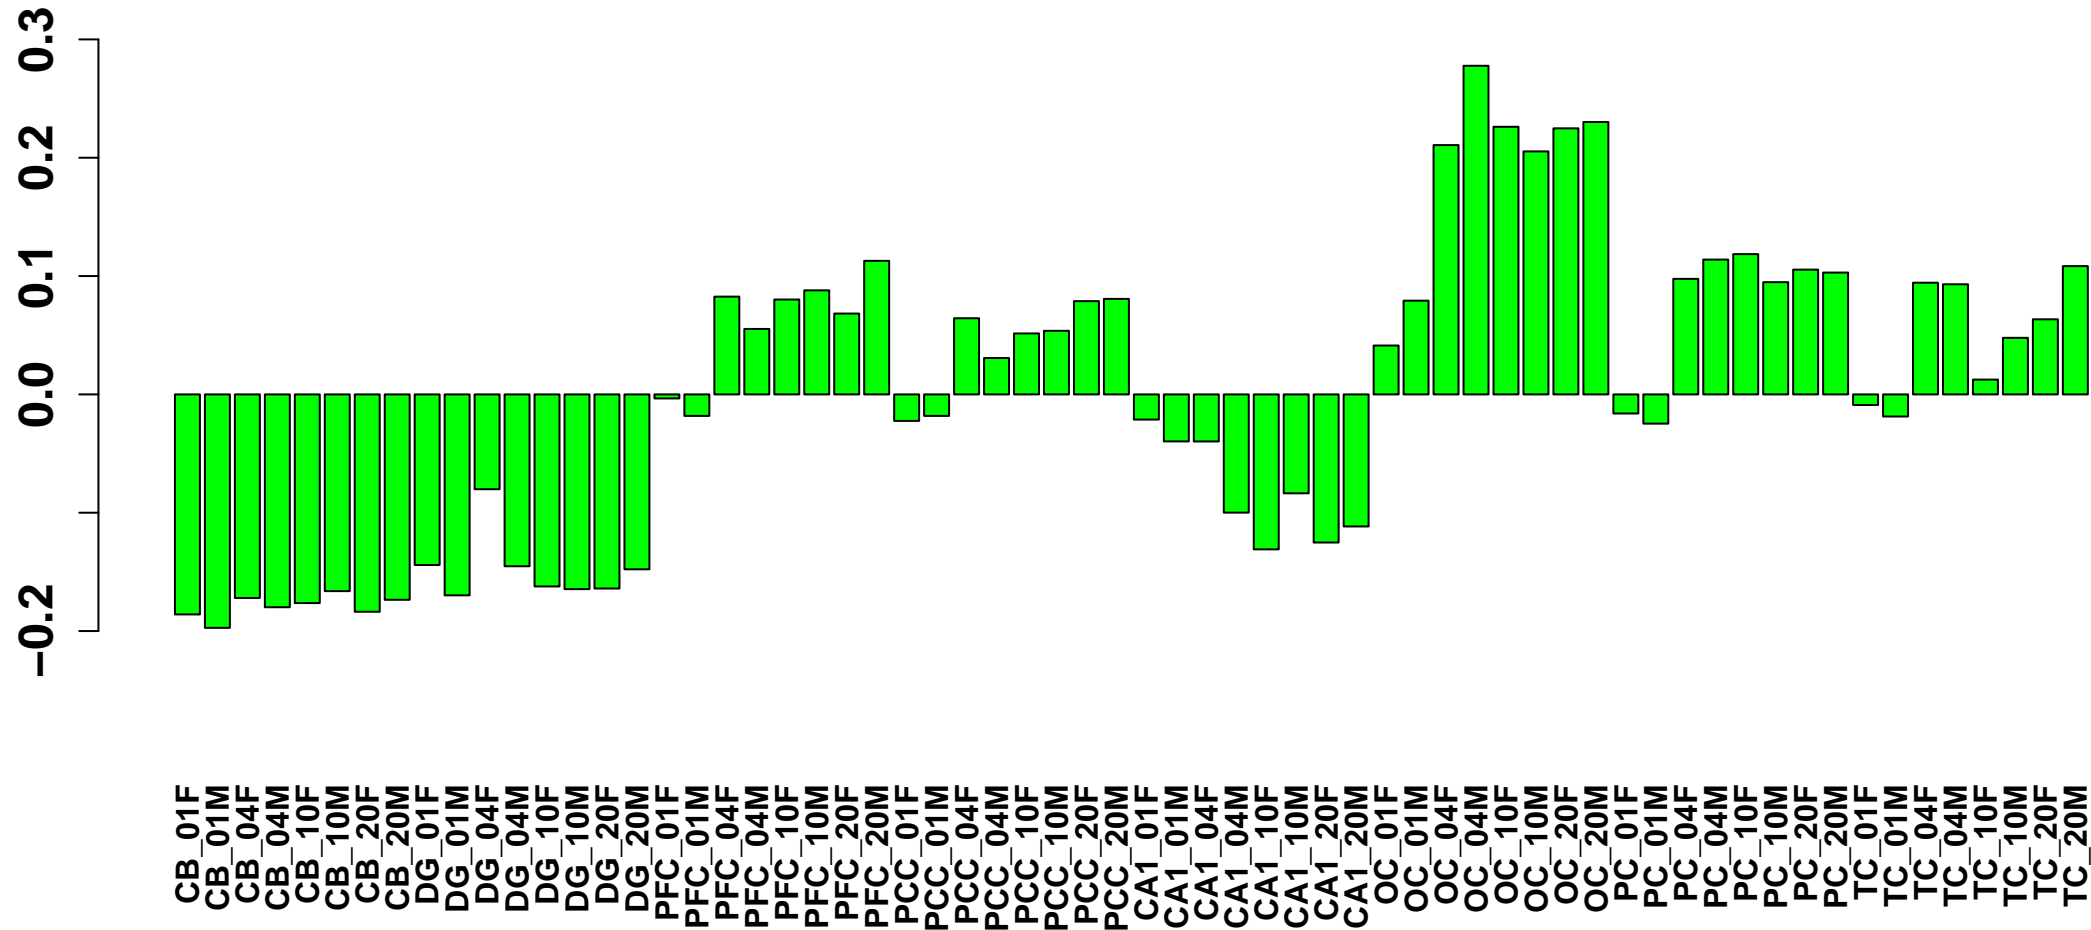

Supplement: Supplemental_Material.tar.gz [file MEgreen_bar_plot.pdf › Supplemental_Material/LncRNA_modules/MEgreen_bar_plot.pdf]

# Module bar plot

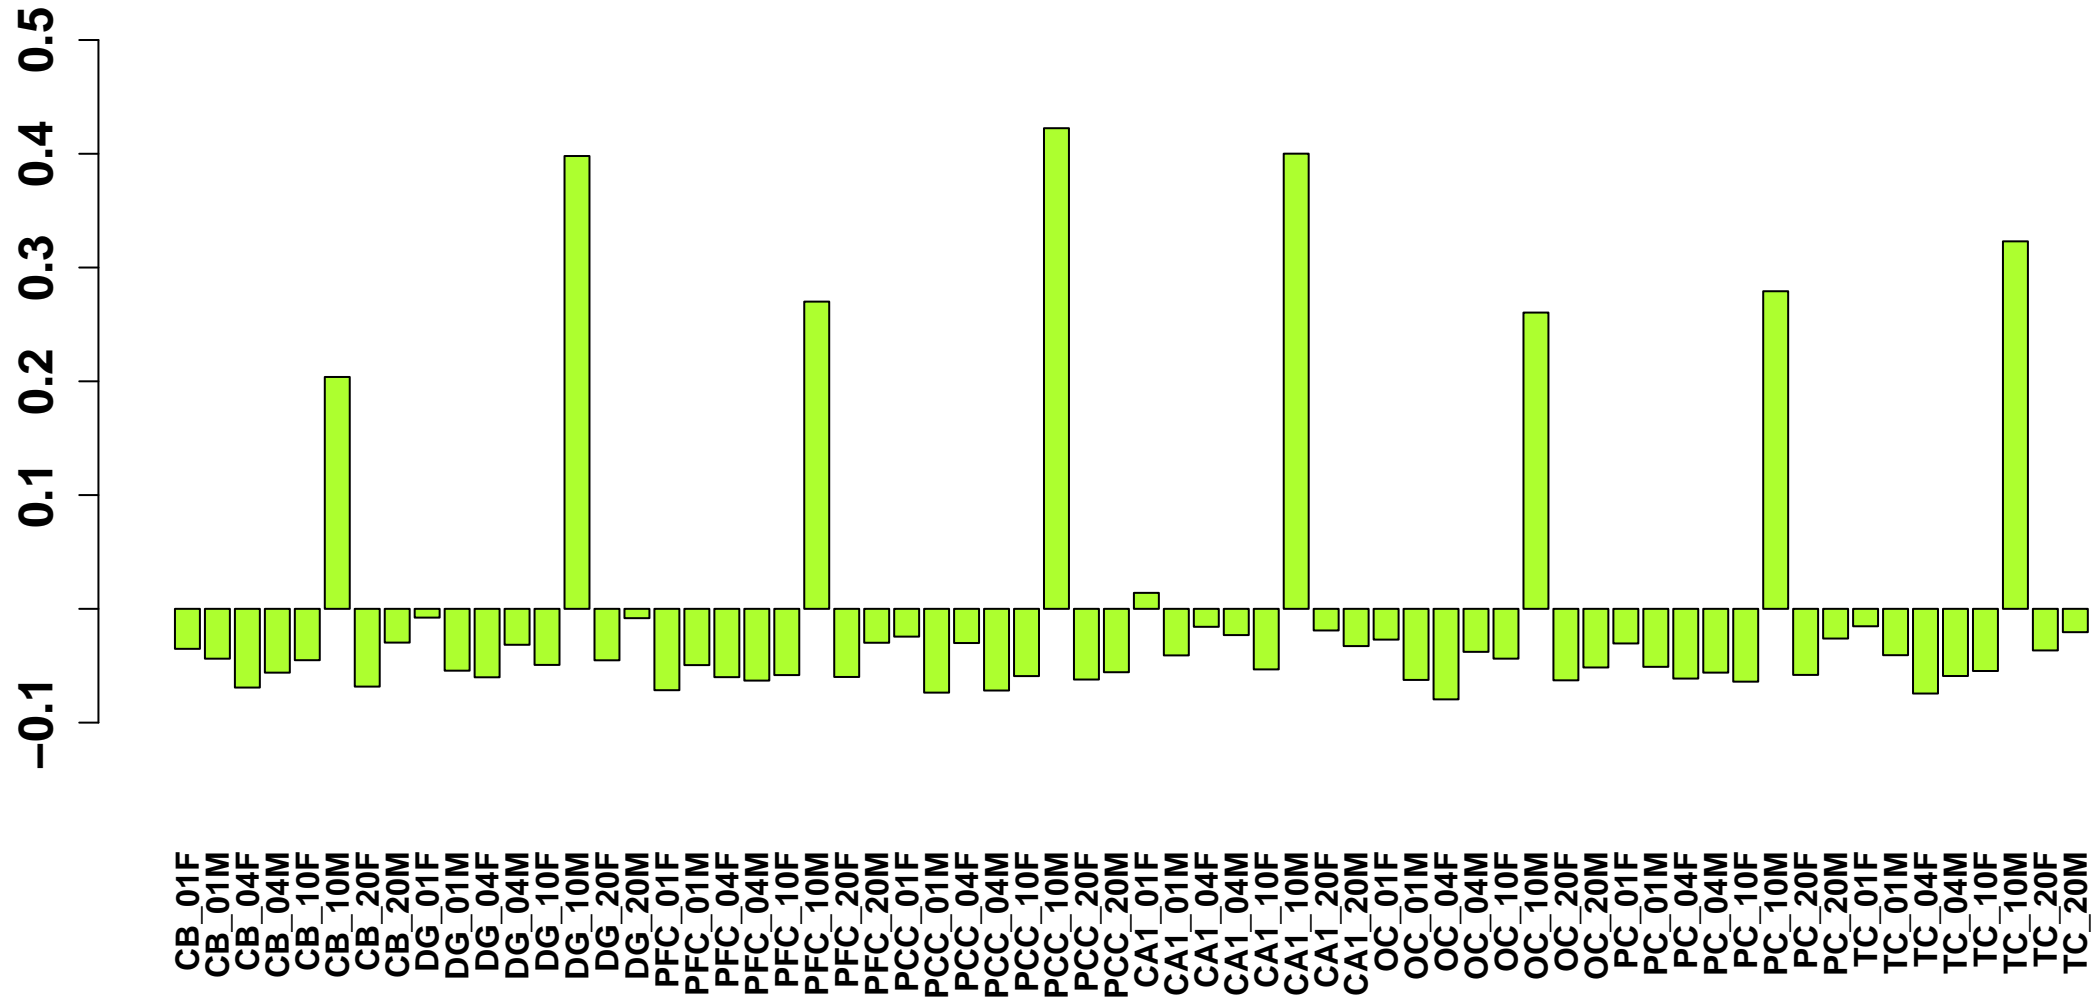

Supplement: Supplemental_Material.tar.gz [file MEgreenyellow_bar_plot.pdf › Supplemental_Material/LncRNA_modules/MEgreenyellow_bar_plot.pdf]

# Module bar plot

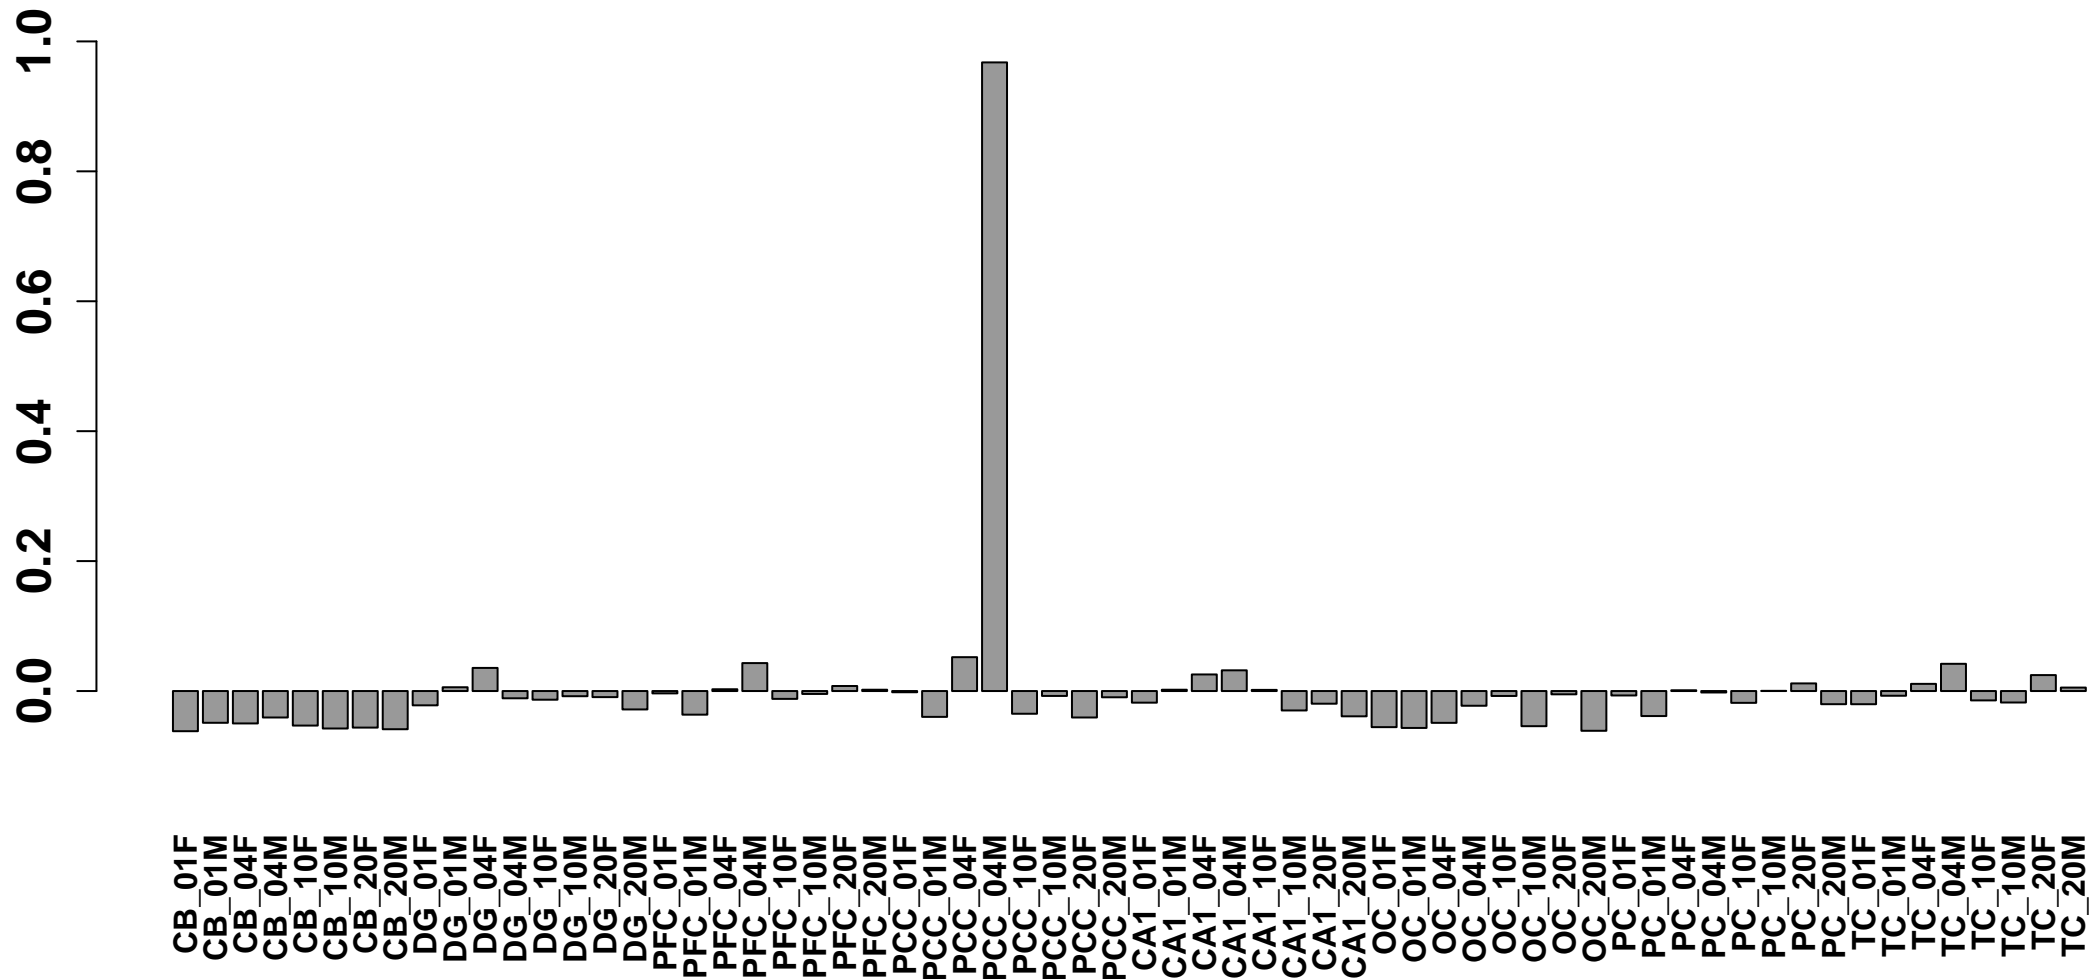

Supplement: Supplemental_Material.tar.gz [file MEgrey60_bar_plot.pdf › Supplemental_Material/LncRNA_modules/MEgrey60_bar_plot.pdf]

# Module bar plot

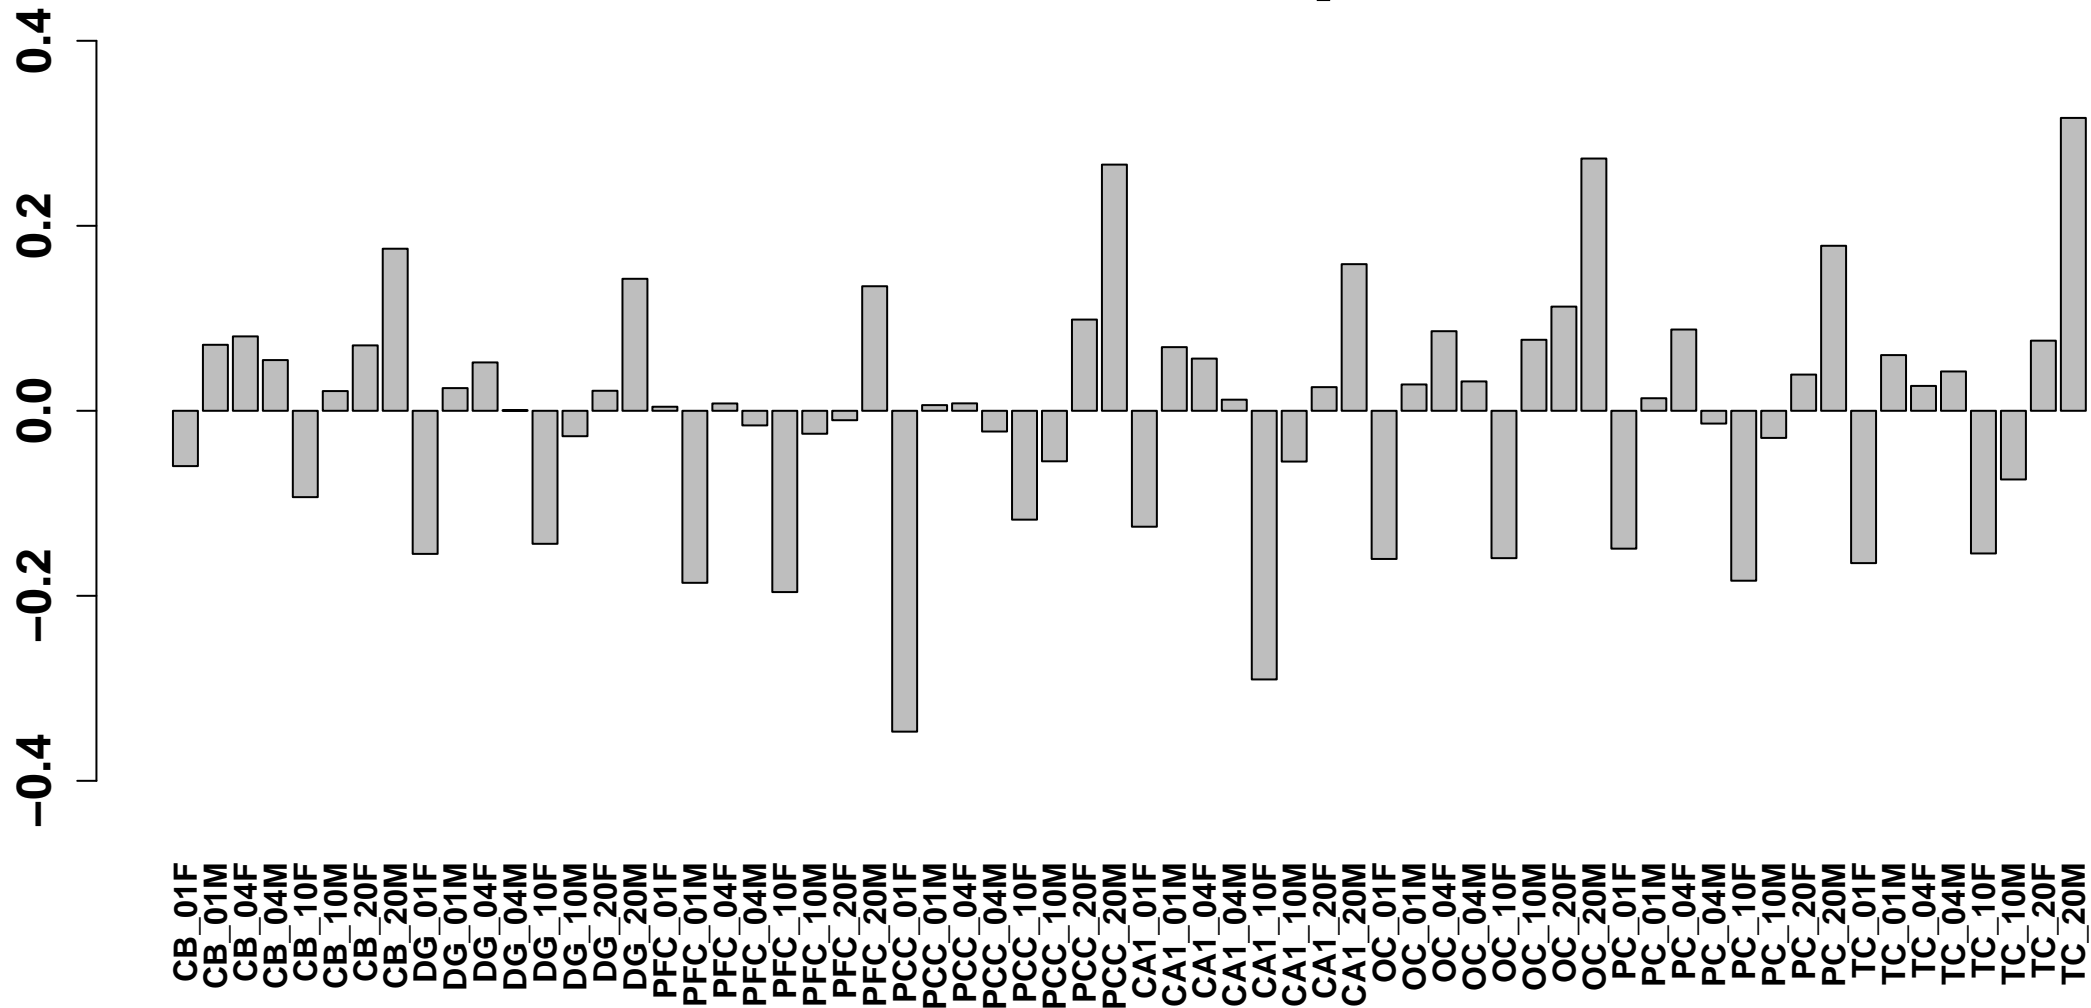

Supplement: Supplemental_Material.tar.gz [file MEgrey_bar_plot.pdf › Supplemental_Material/LncRNA_modules/MEgrey_bar_plot.pdf]

# Module bar plot

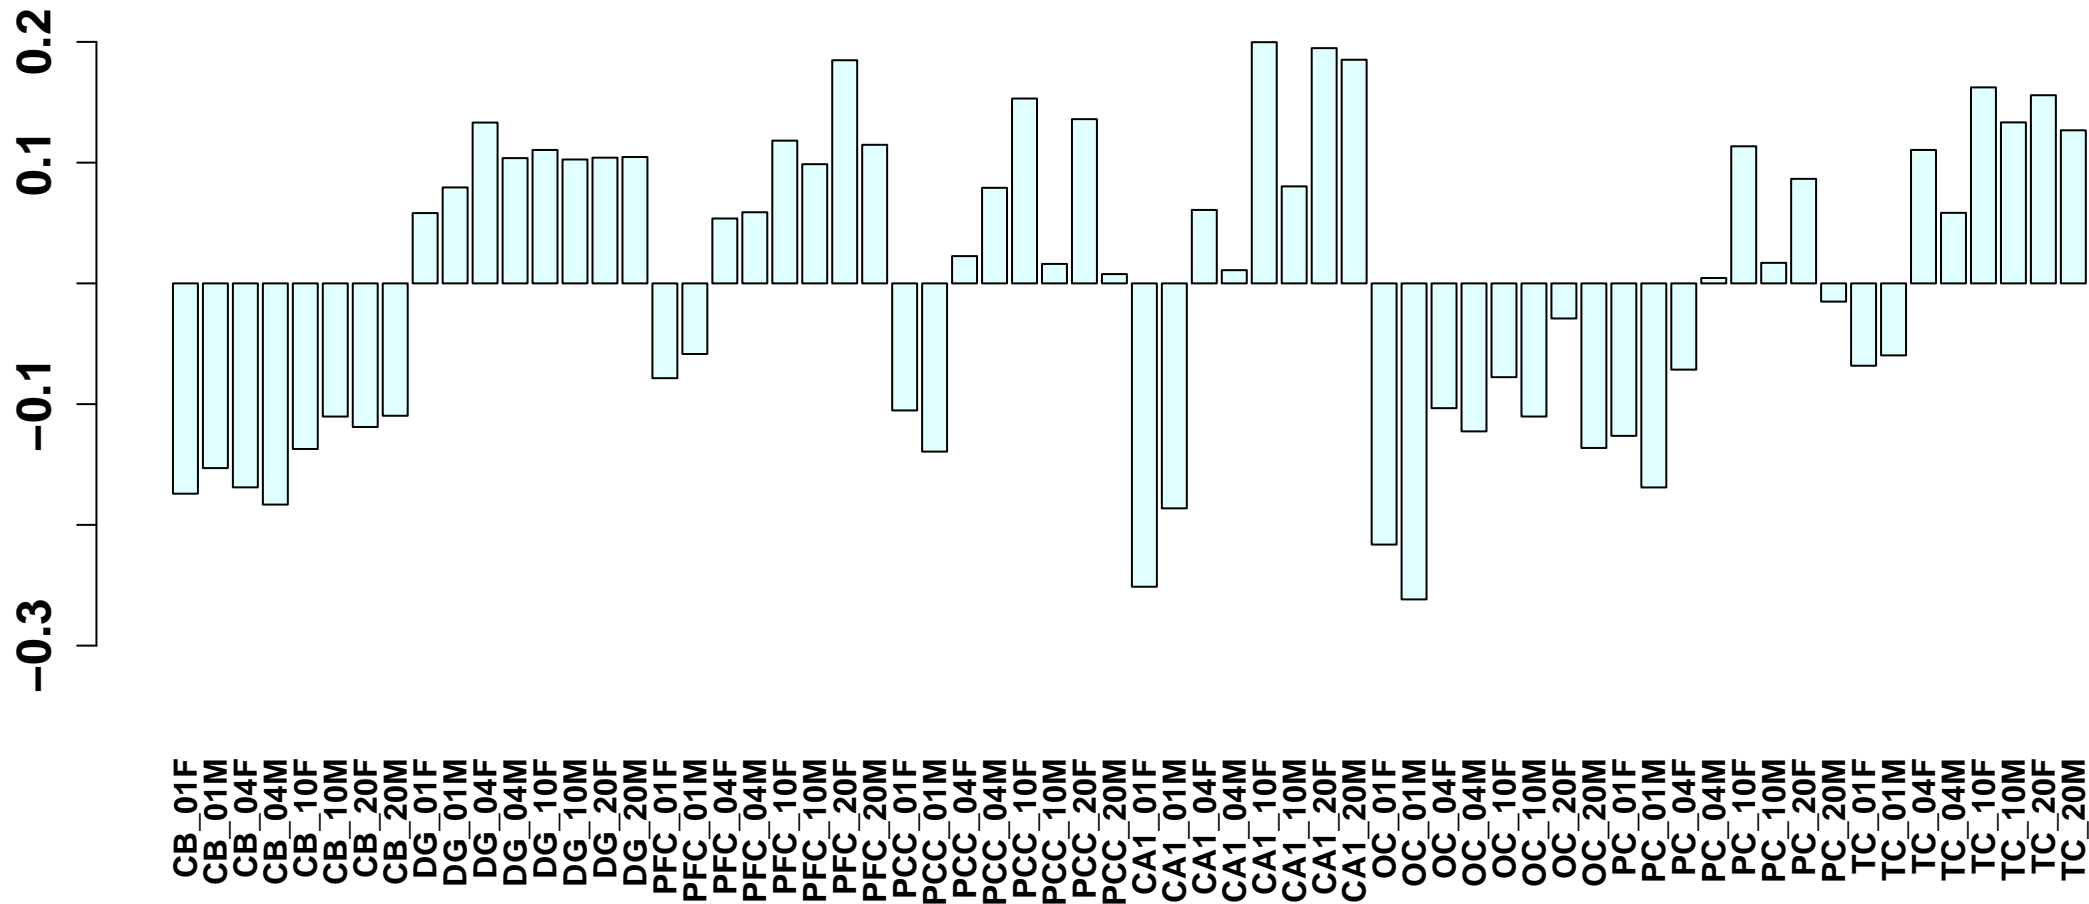

Supplement: Supplemental_Material.tar.gz [file MElightcyan_bar_plot.pdf › Supplemental_Material/LncRNA_modules/MElightcyan_bar_plot.pdf]

# Module bar plot

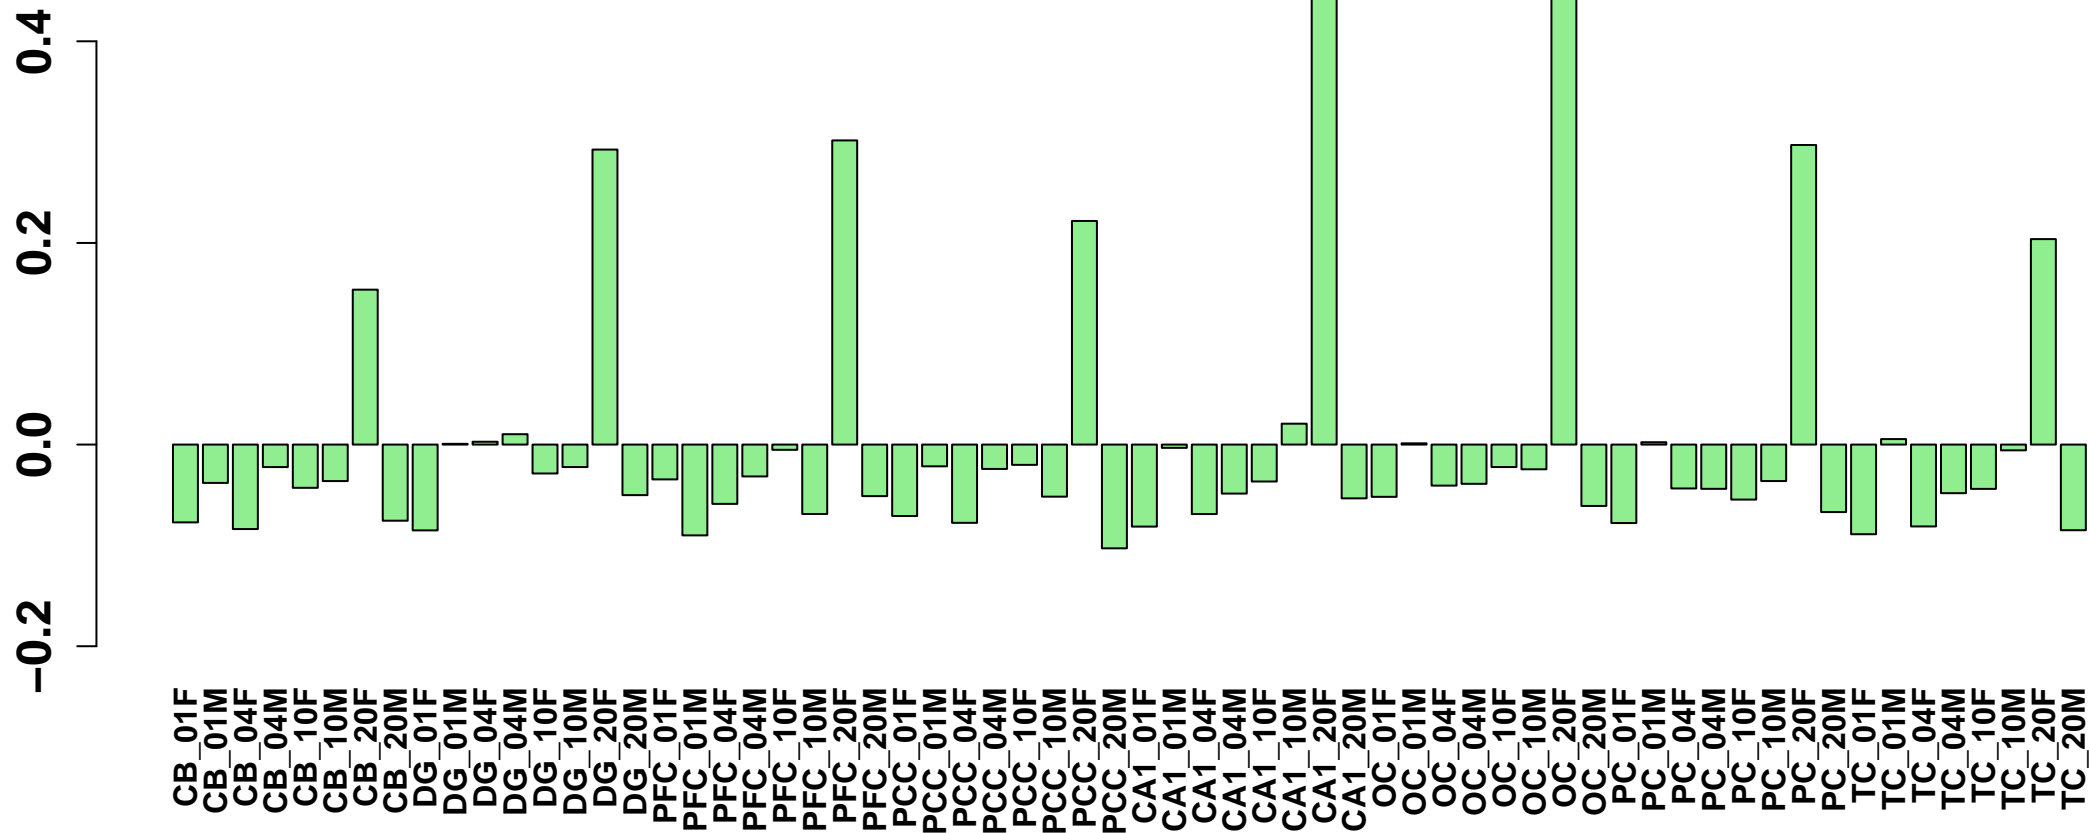

Supplement: Supplemental_Material.tar.gz [file MElightgreen_bar_plot.pdf › Supplemental_Material/LncRNA_modules/MElightgreen_bar_plot.pdf]

# Module bar plot

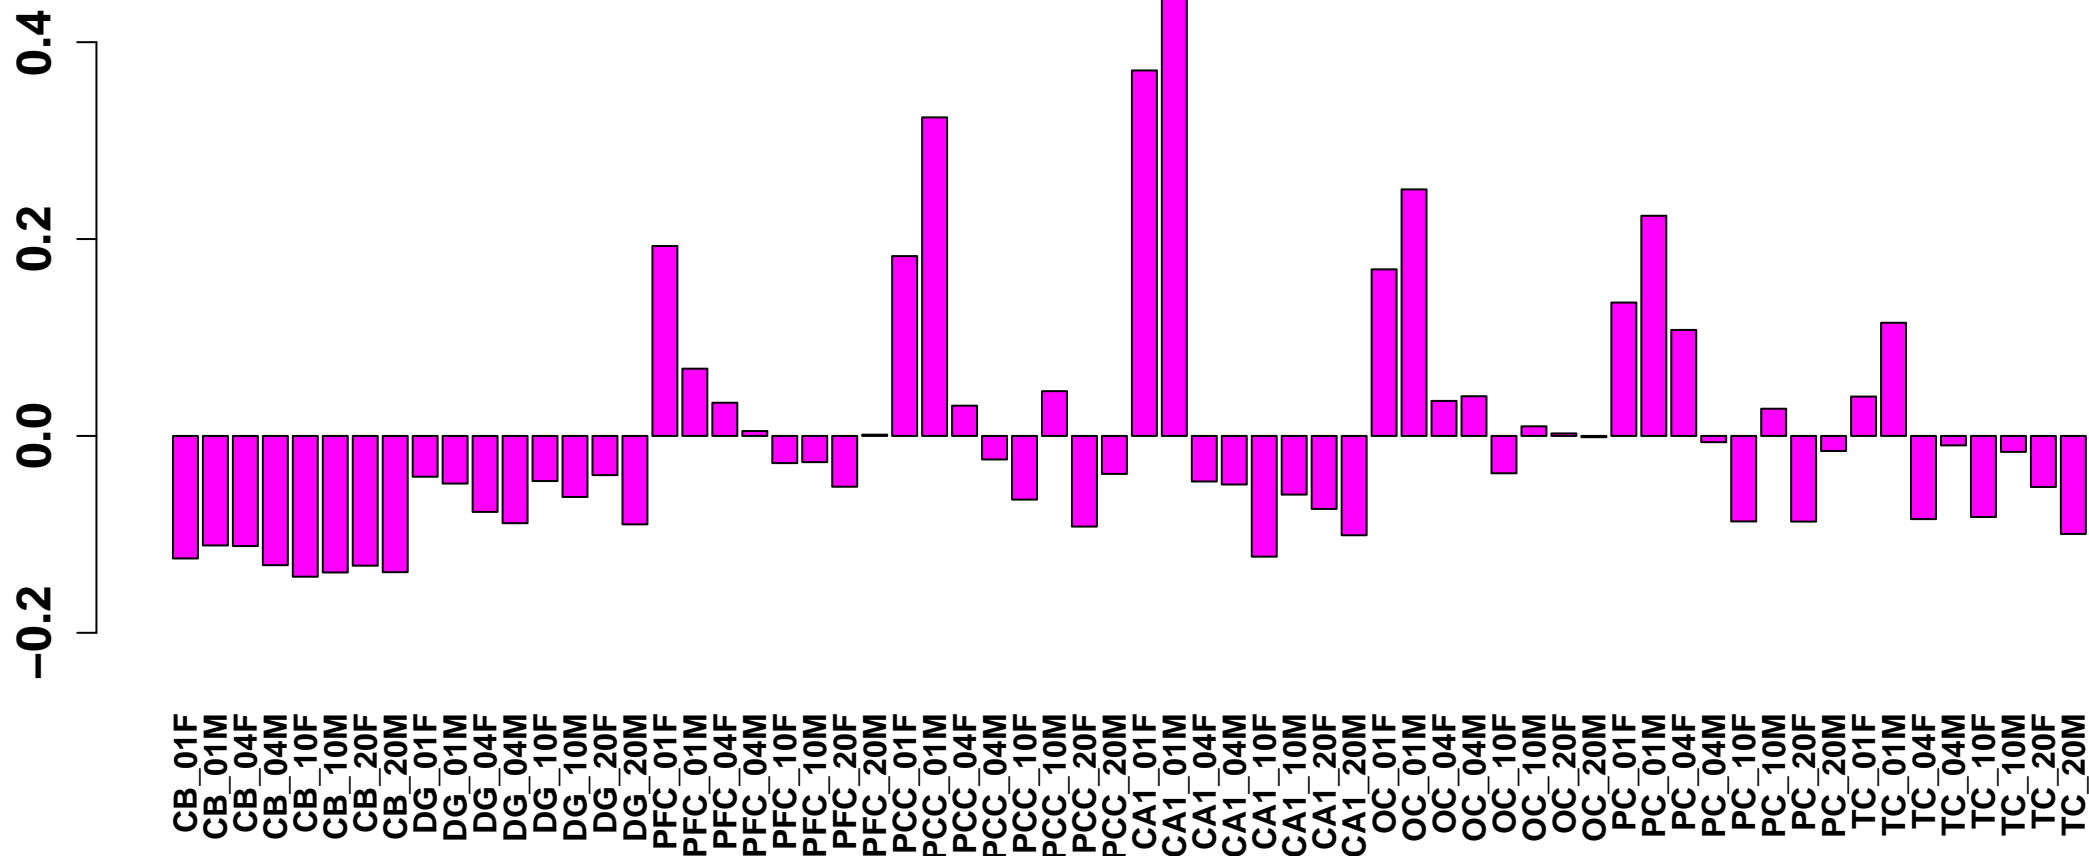

Supplement: Supplemental_Material.tar.gz [file MEmagenta_bar_plot.pdf › Supplemental_Material/LncRNA_modules/MEmagenta_bar_plot.pdf]

# Module bar plot

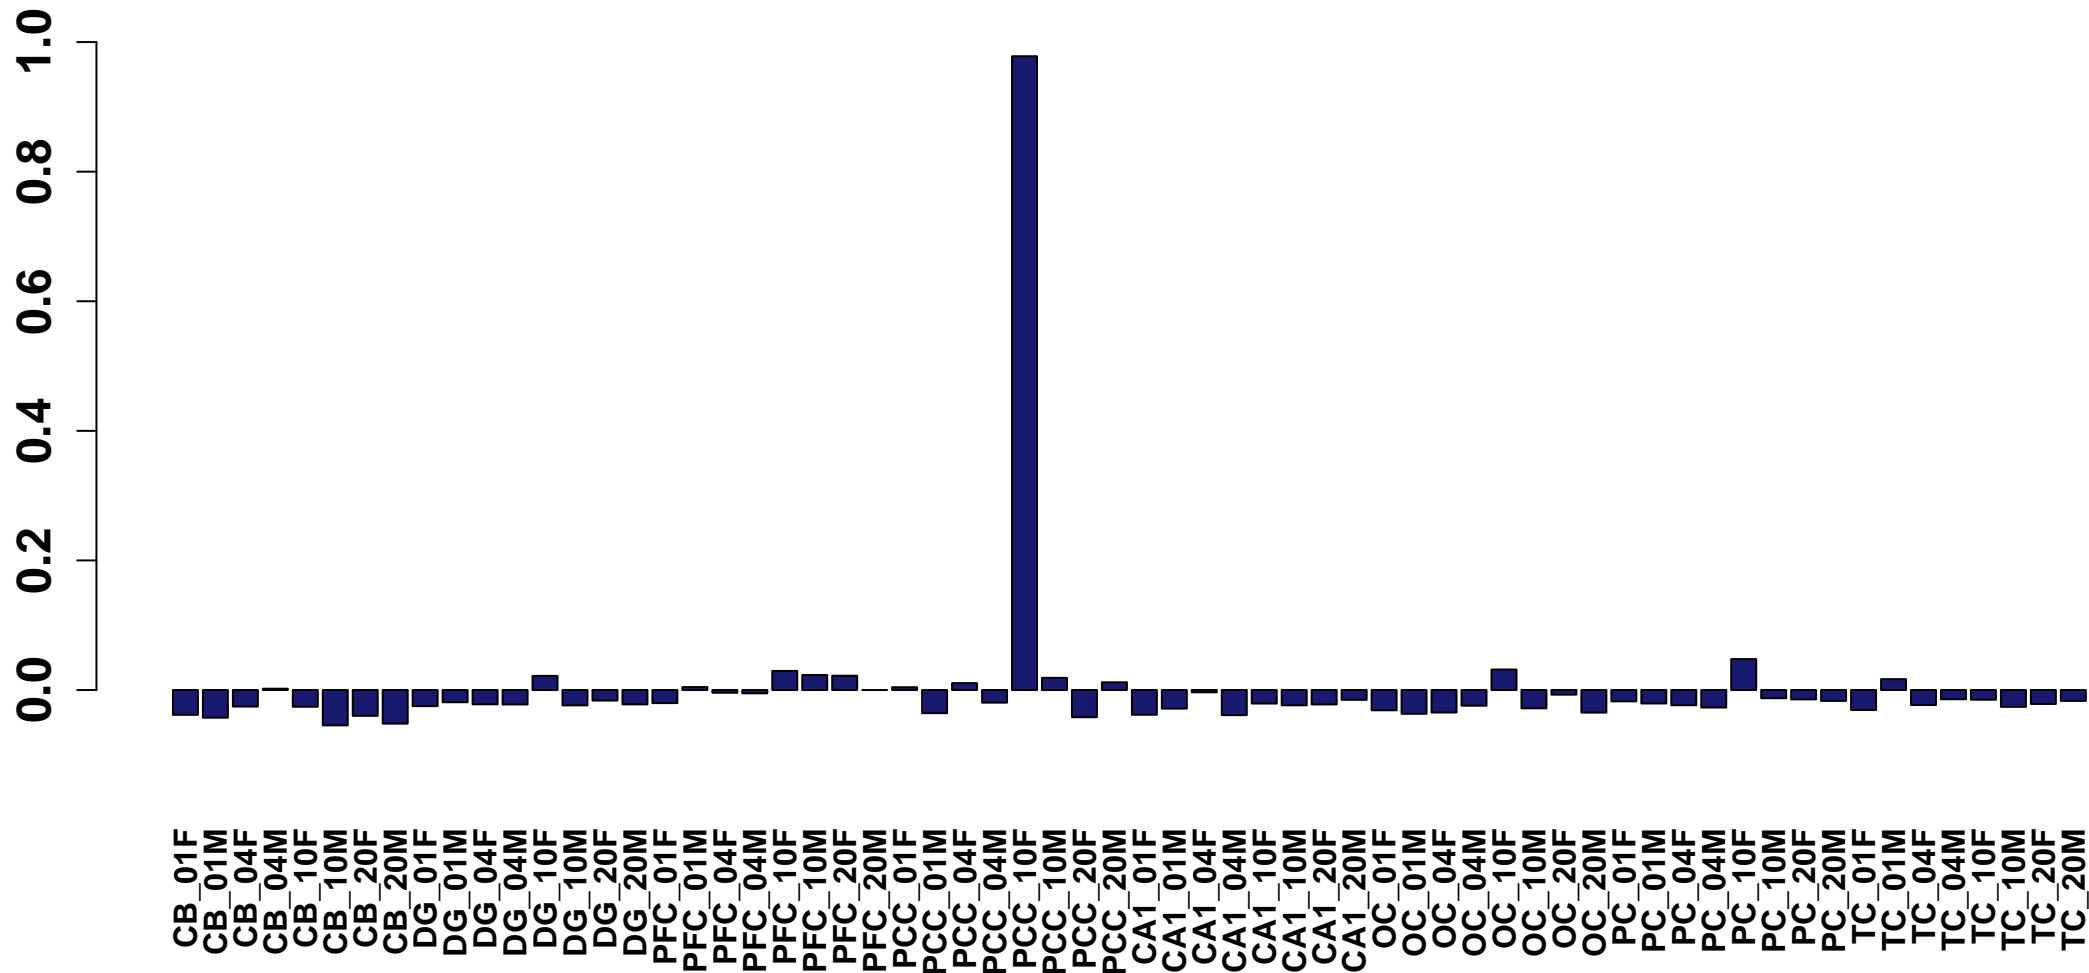

Supplement: Supplemental_Material.tar.gz [file MEmidnightblue_bar_plot.pdf › Supplemental_Material/LncRNA_modules/MEmidnightblue_bar_plot.pdf]

# Module bar plot

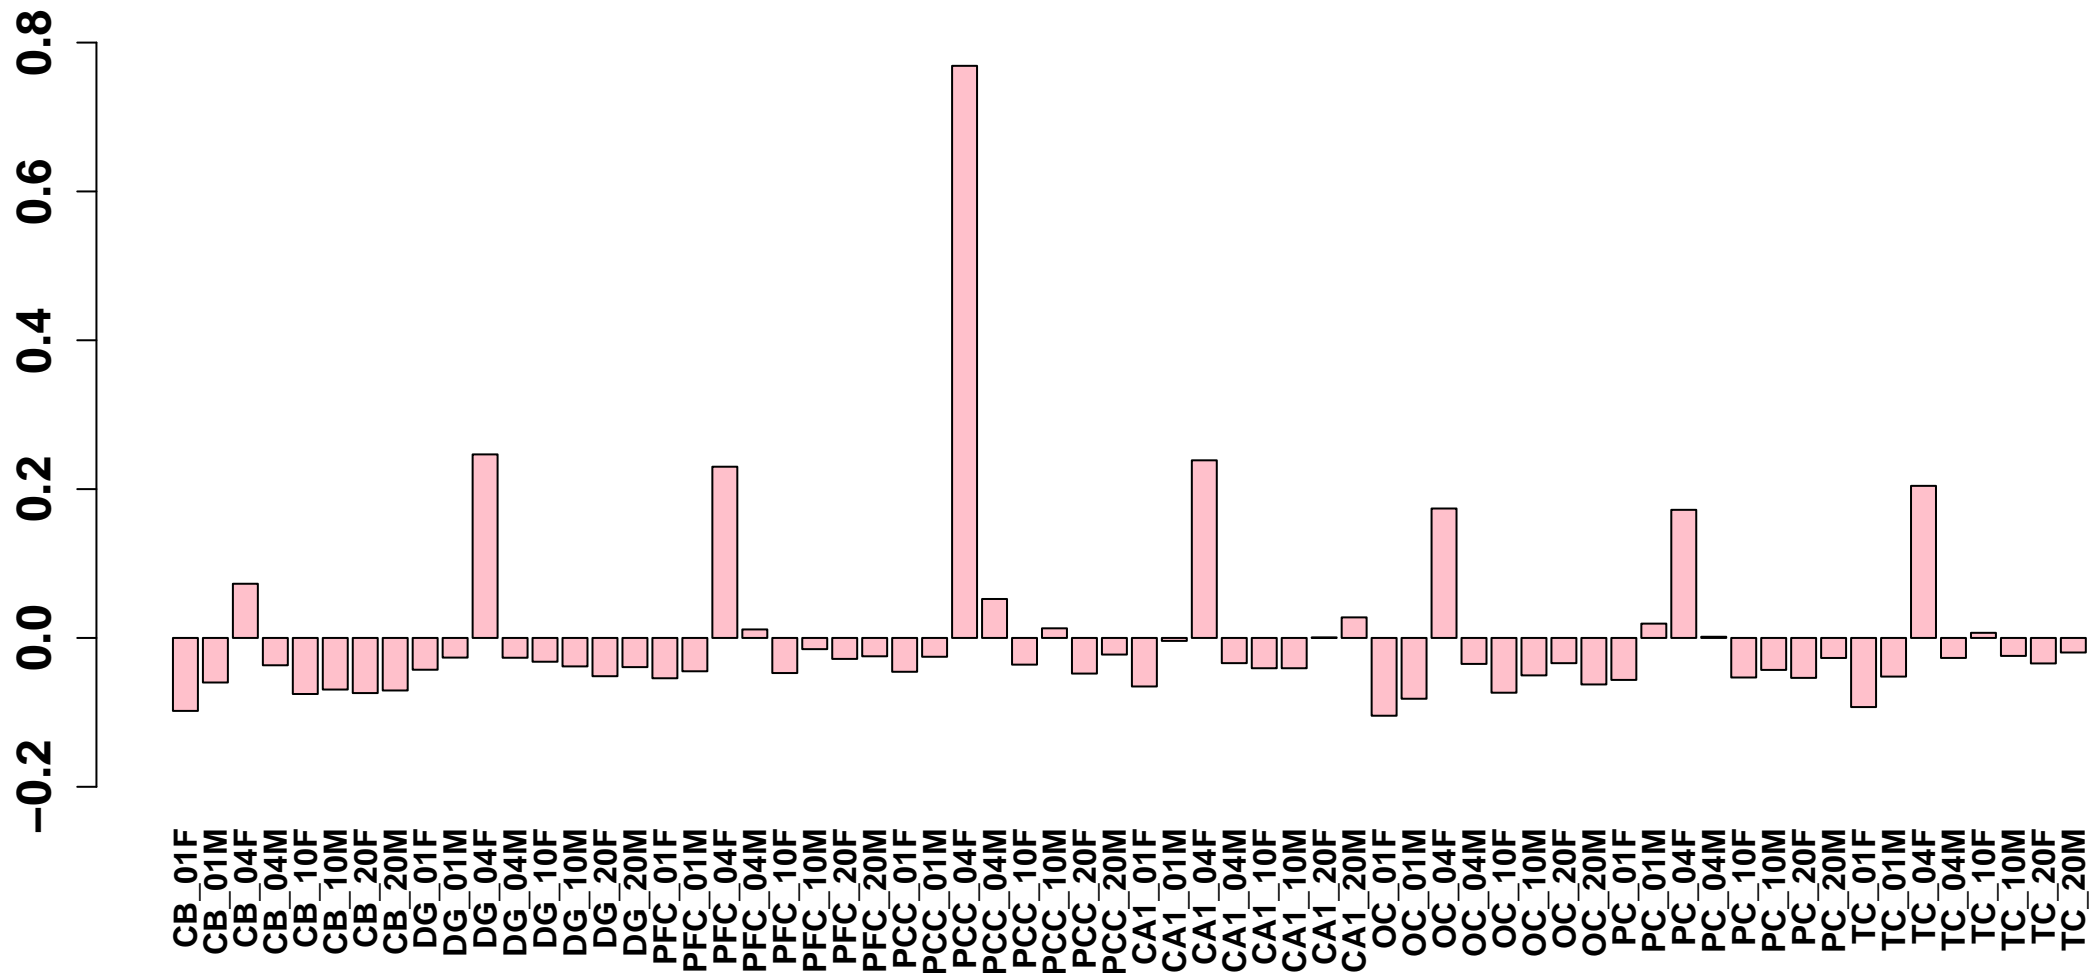

Supplement: Supplemental_Material.tar.gz [file MEpink_bar_plot.pdf › Supplemental_Material/LncRNA_modules/MEpink_bar_plot.pdf]

# Module bar plot

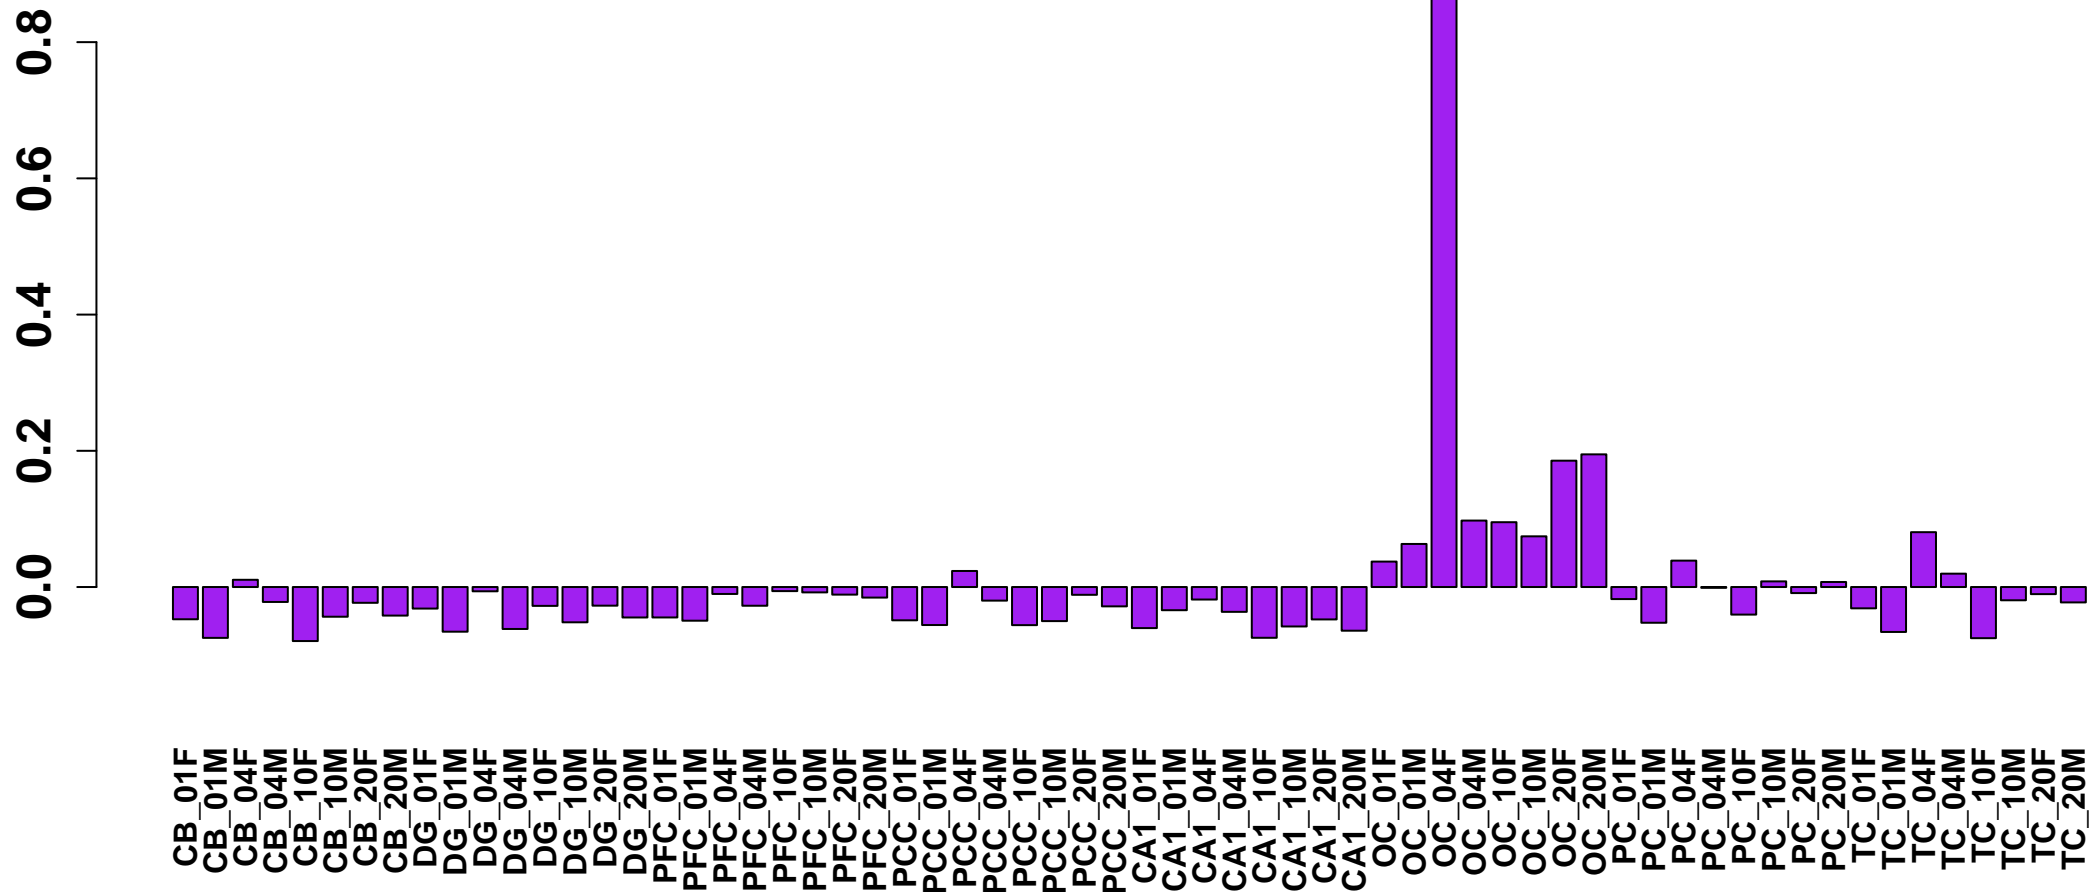

Supplement: Supplemental_Material.tar.gz [file MEpurple_bar_plot.pdf › Supplemental_Material/LncRNA_modules/MEpurple_bar_plot.pdf]

# Module bar plot

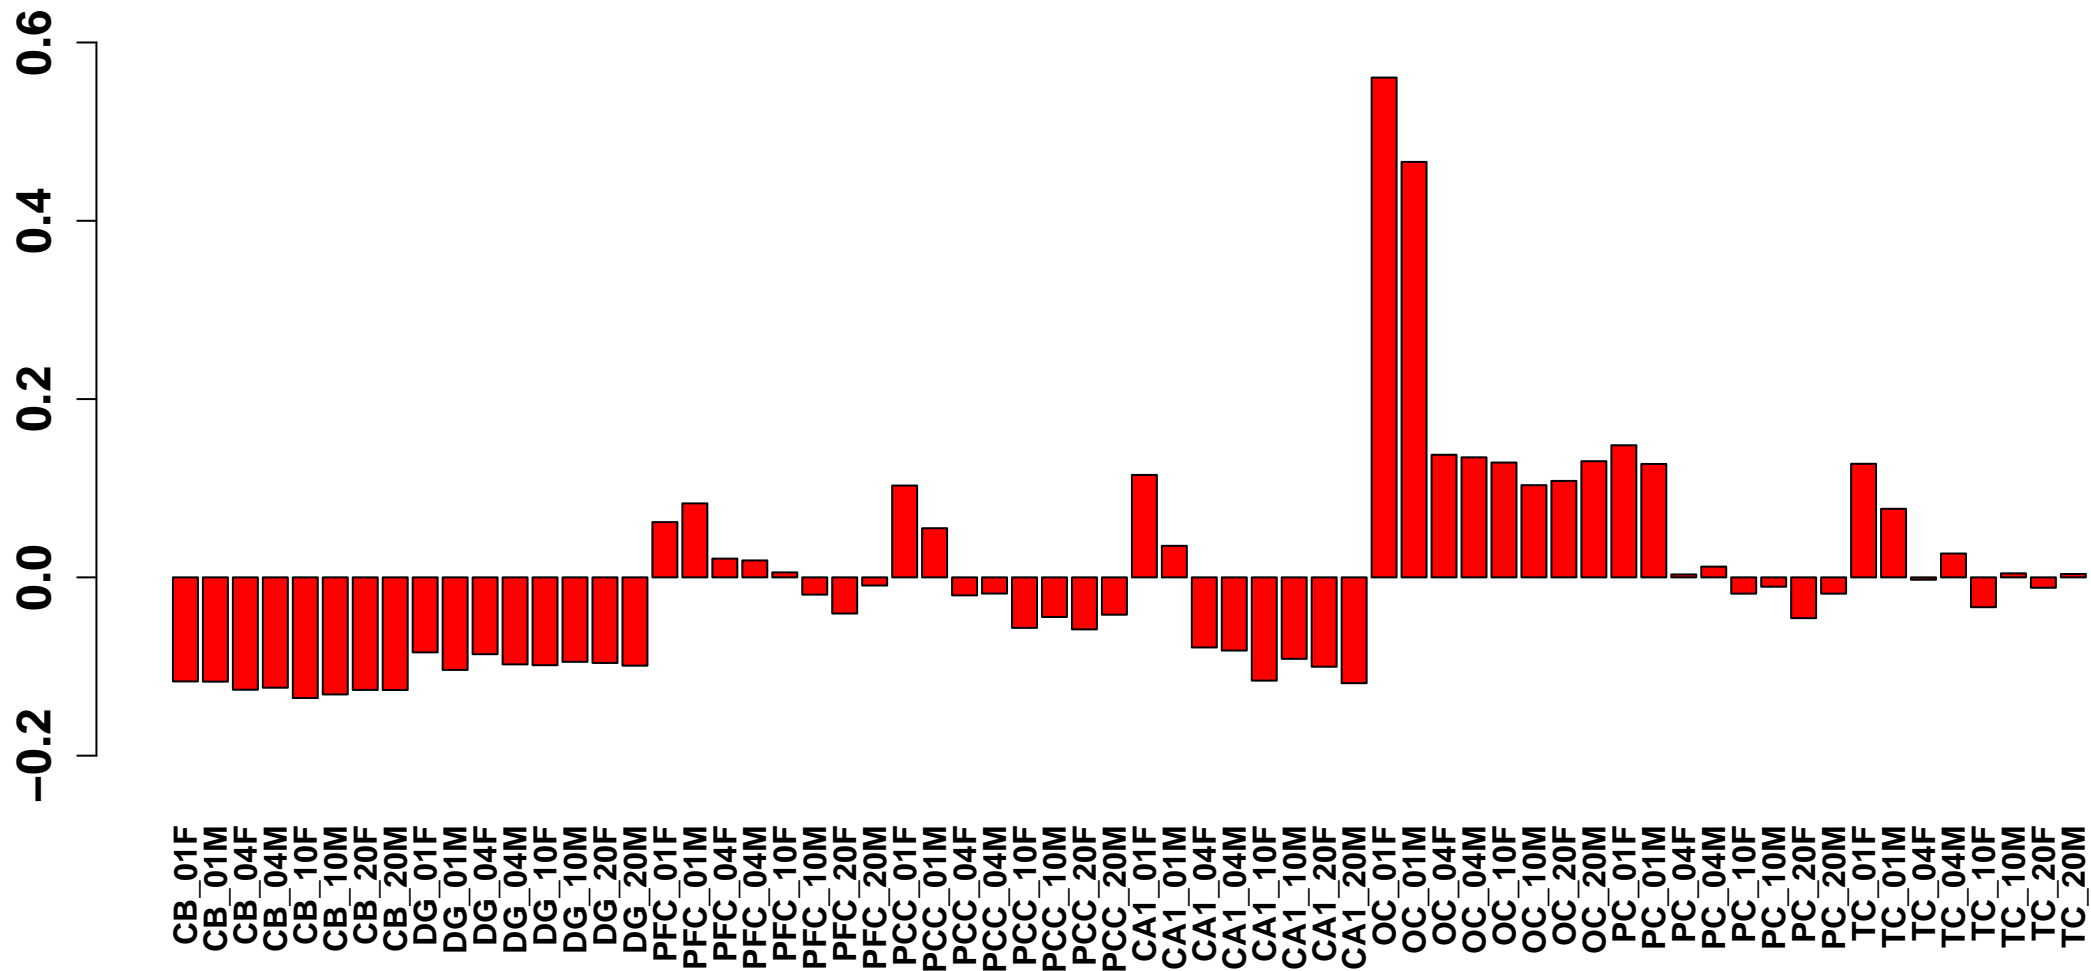

Supplement: Supplemental_Material.tar.gz [file MEred_bar_plot.pdf › Supplemental_Material/LncRNA_modules/MEred_bar_plot.pdf]

# Module bar plot

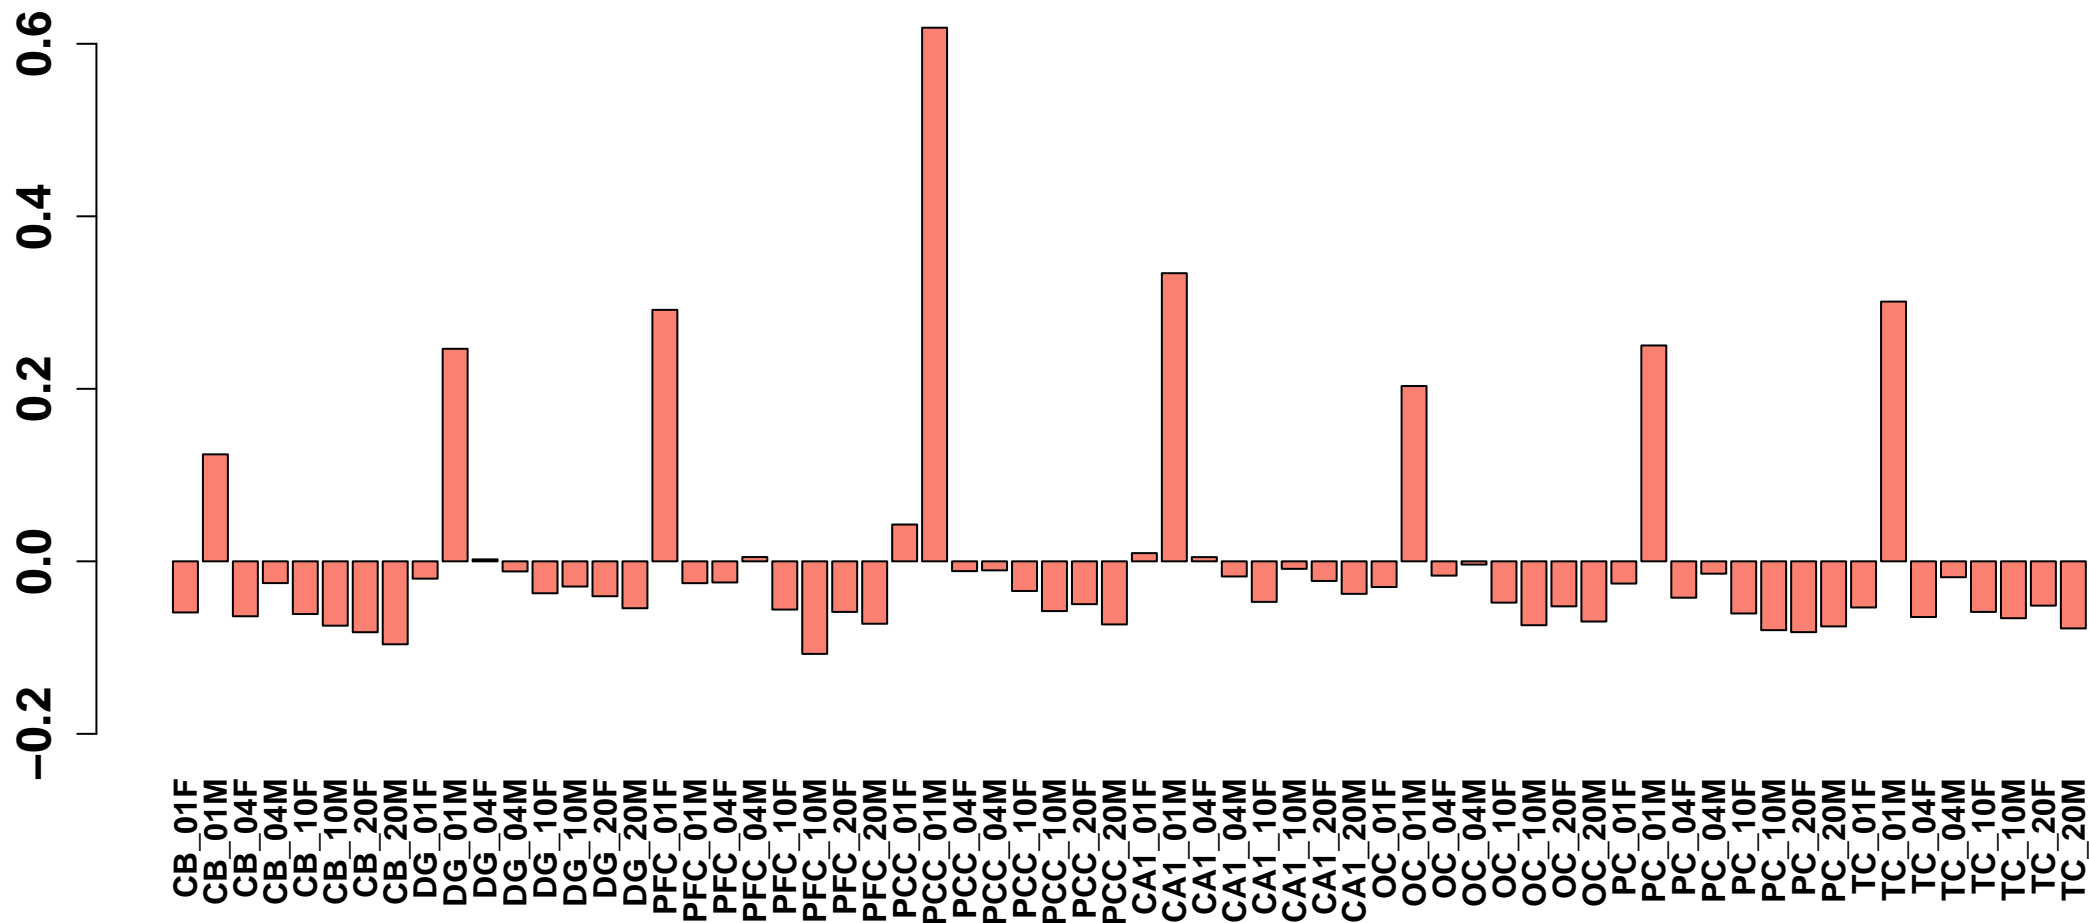

Supplement: Supplemental_Material.tar.gz [file MEsalmon_bar_plot.pdf › Supplemental_Material/LncRNA_modules/MEsalmon_bar_plot.pdf]

# Module bar plot

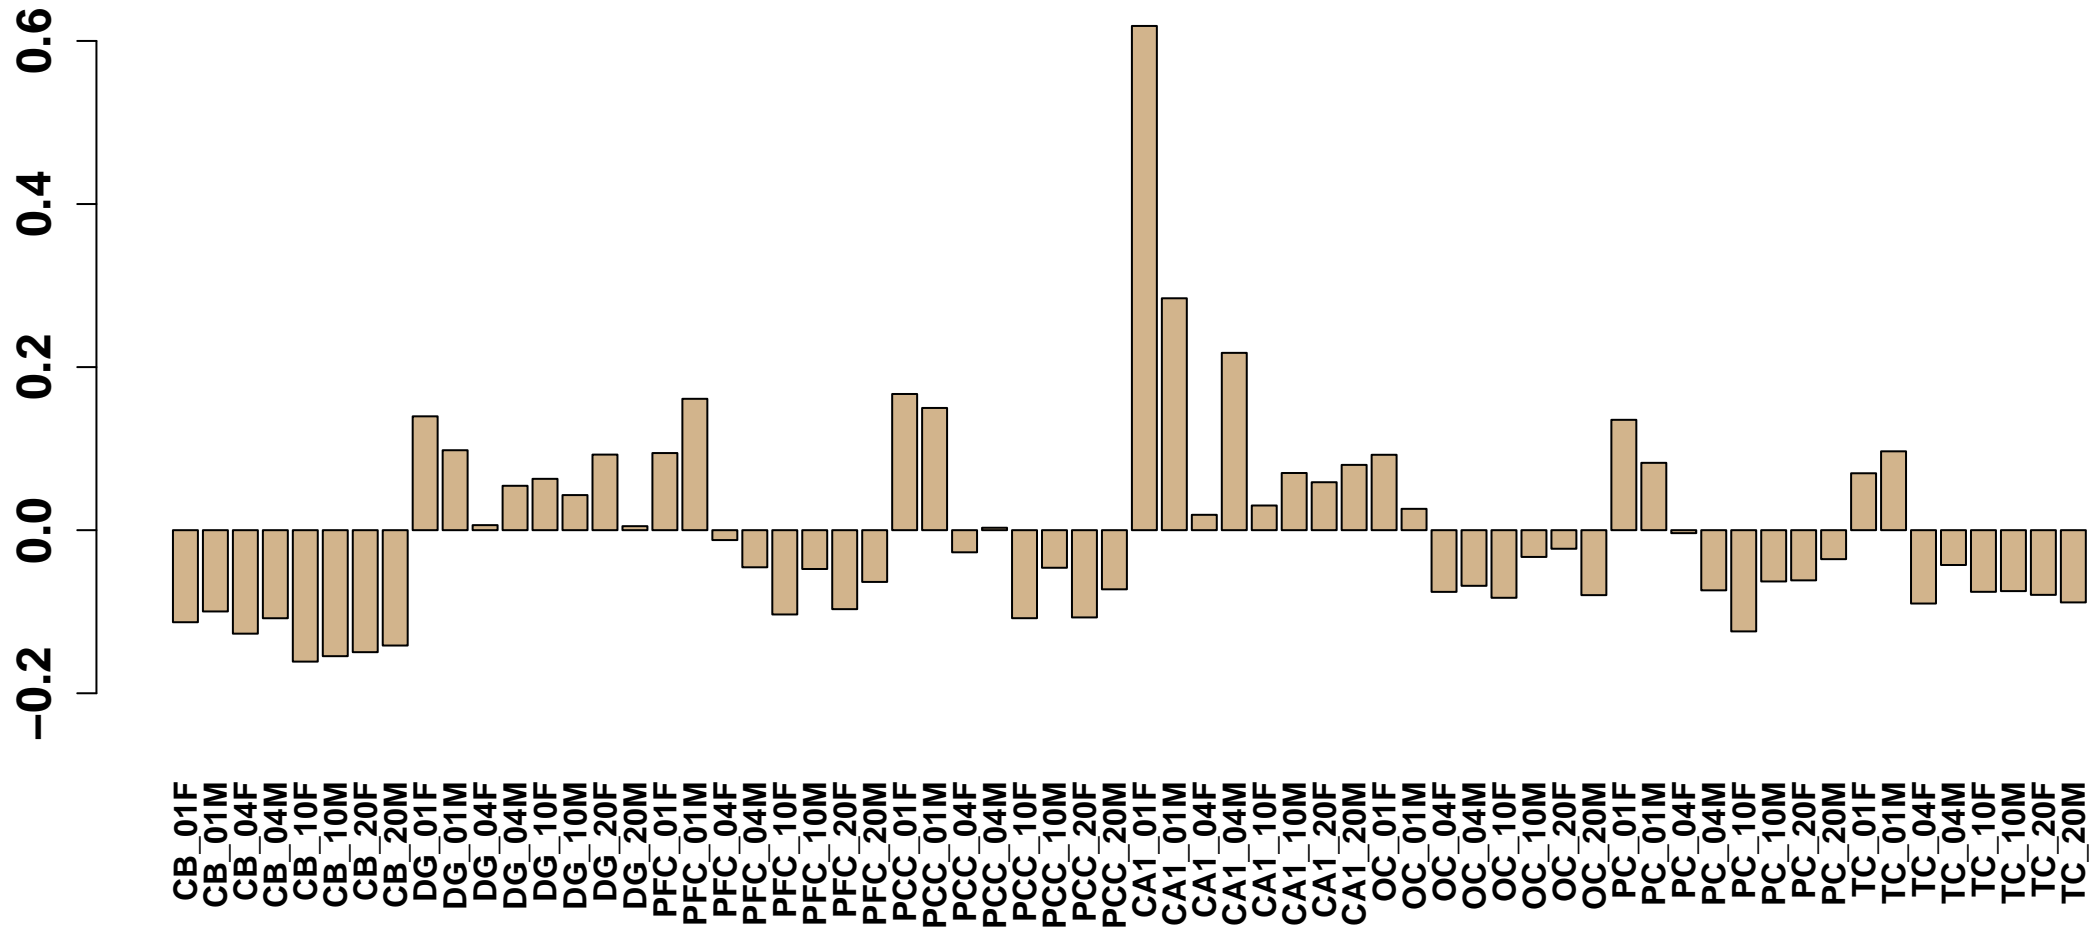

Supplement: Supplemental_Material.tar.gz [file MEtan_bar_plot.pdf › Supplemental_Material/LncRNA_modules/MEtan_bar_plot.pdf]

# Module bar plot

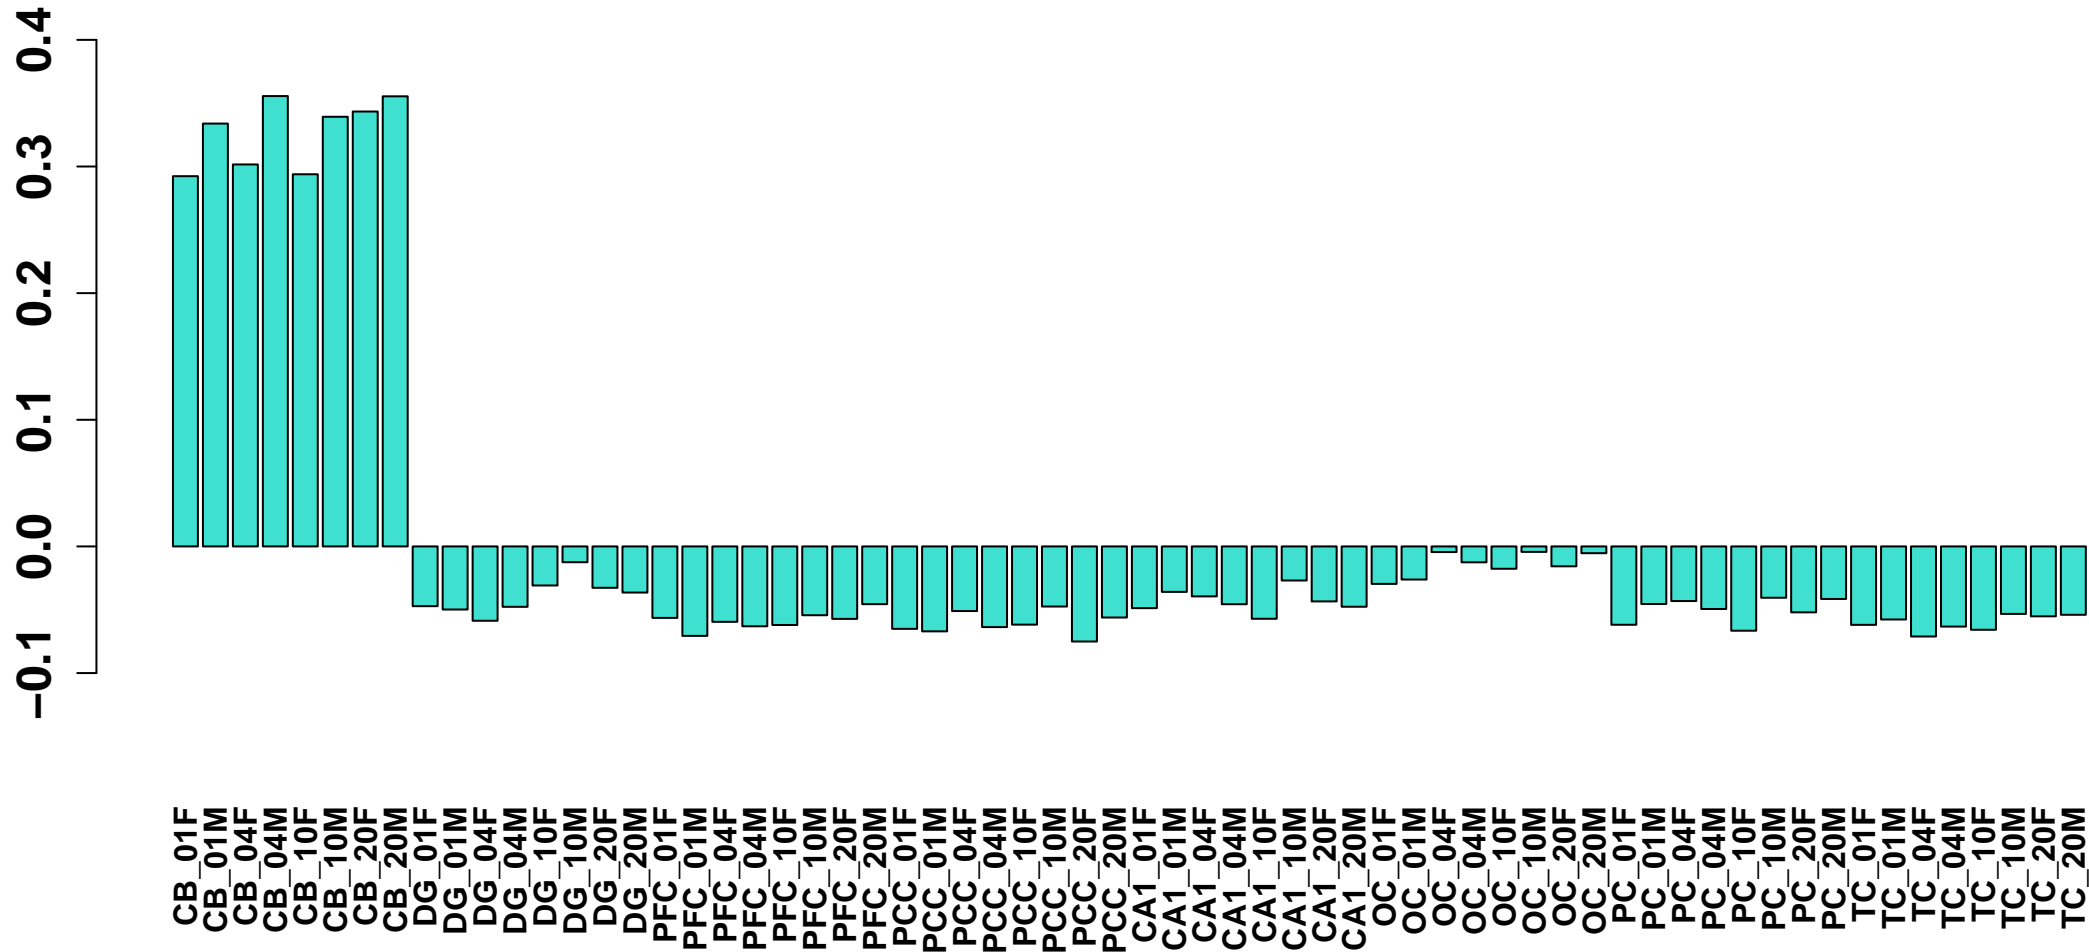

Supplement: Supplemental_Material.tar.gz [file MEturquoise_bar_plot.pdf › Supplemental_Material/LncRNA_modules/MEturquoise_bar_plot.pdf]

# Module bar plot

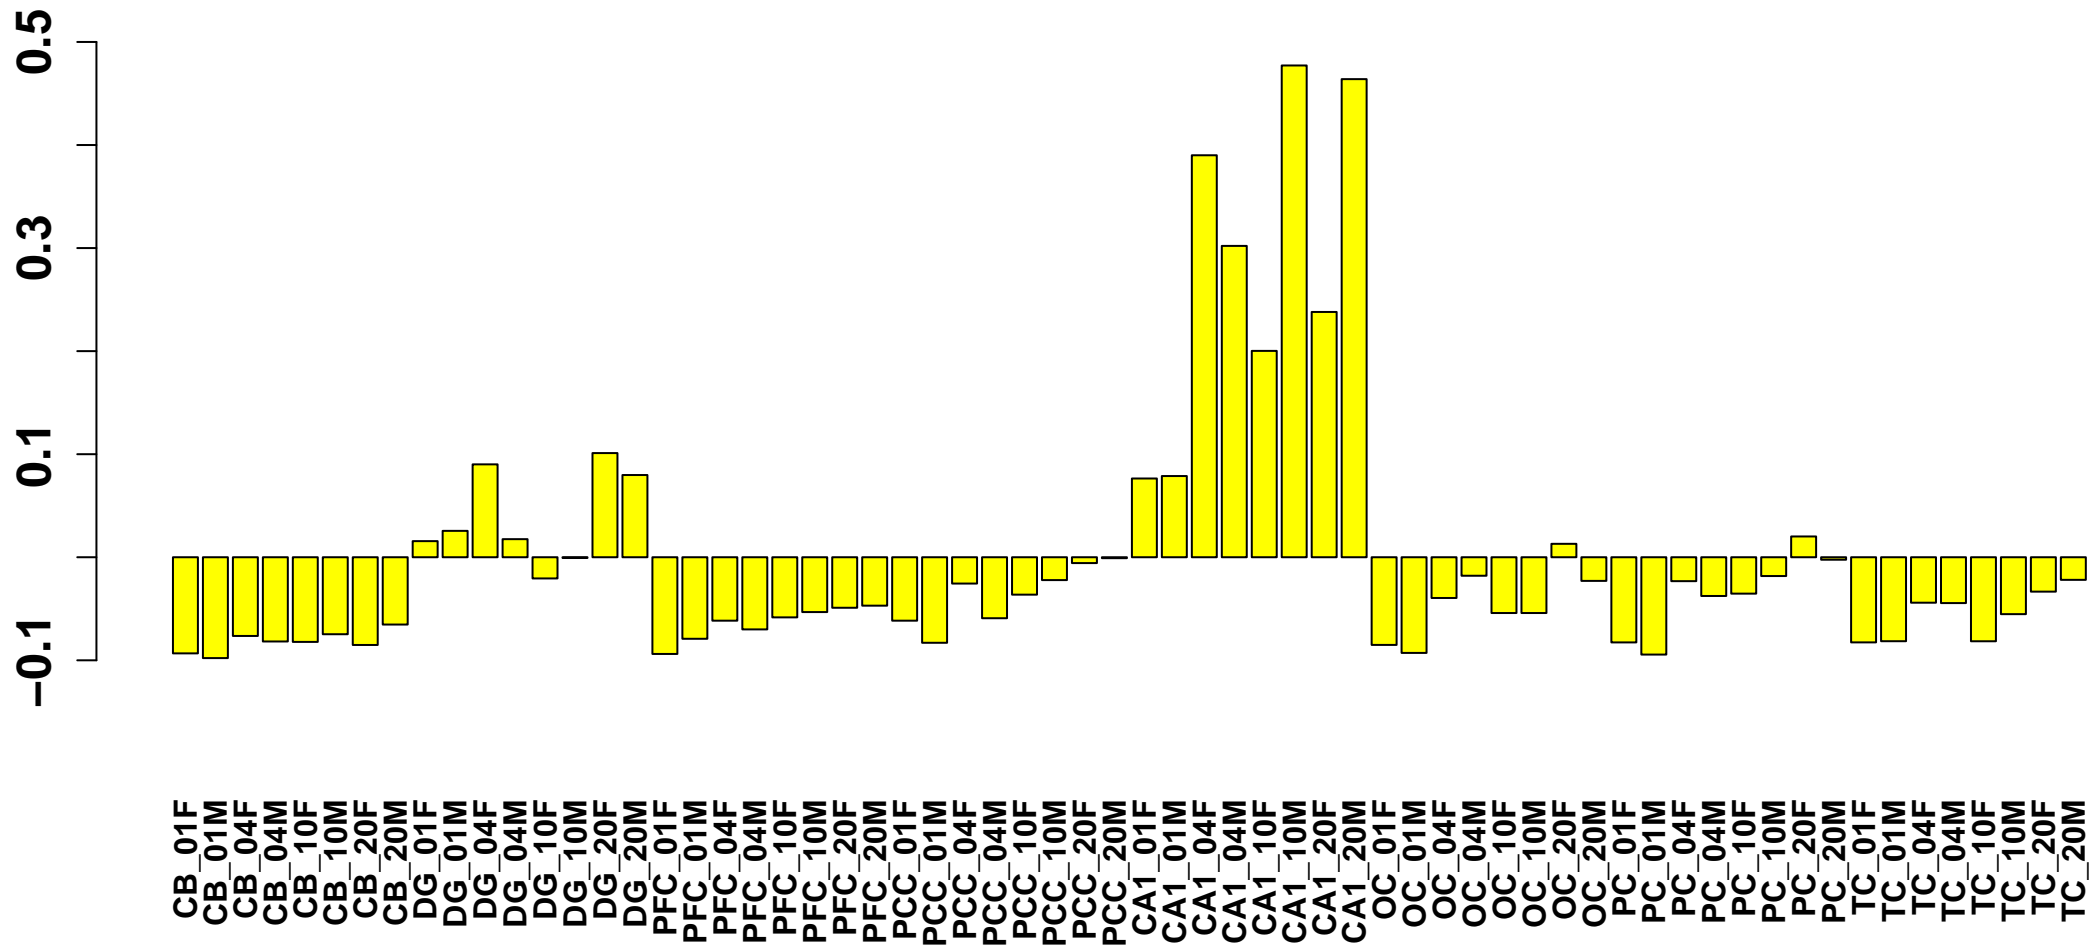

Supplement: Supplemental_Material.tar.gz [file MEyellow_bar_plot.pdf › Supplemental_Material/LncRNA_modules/MEyellow_bar_plot.pdf]

# Cluster Dendrogram

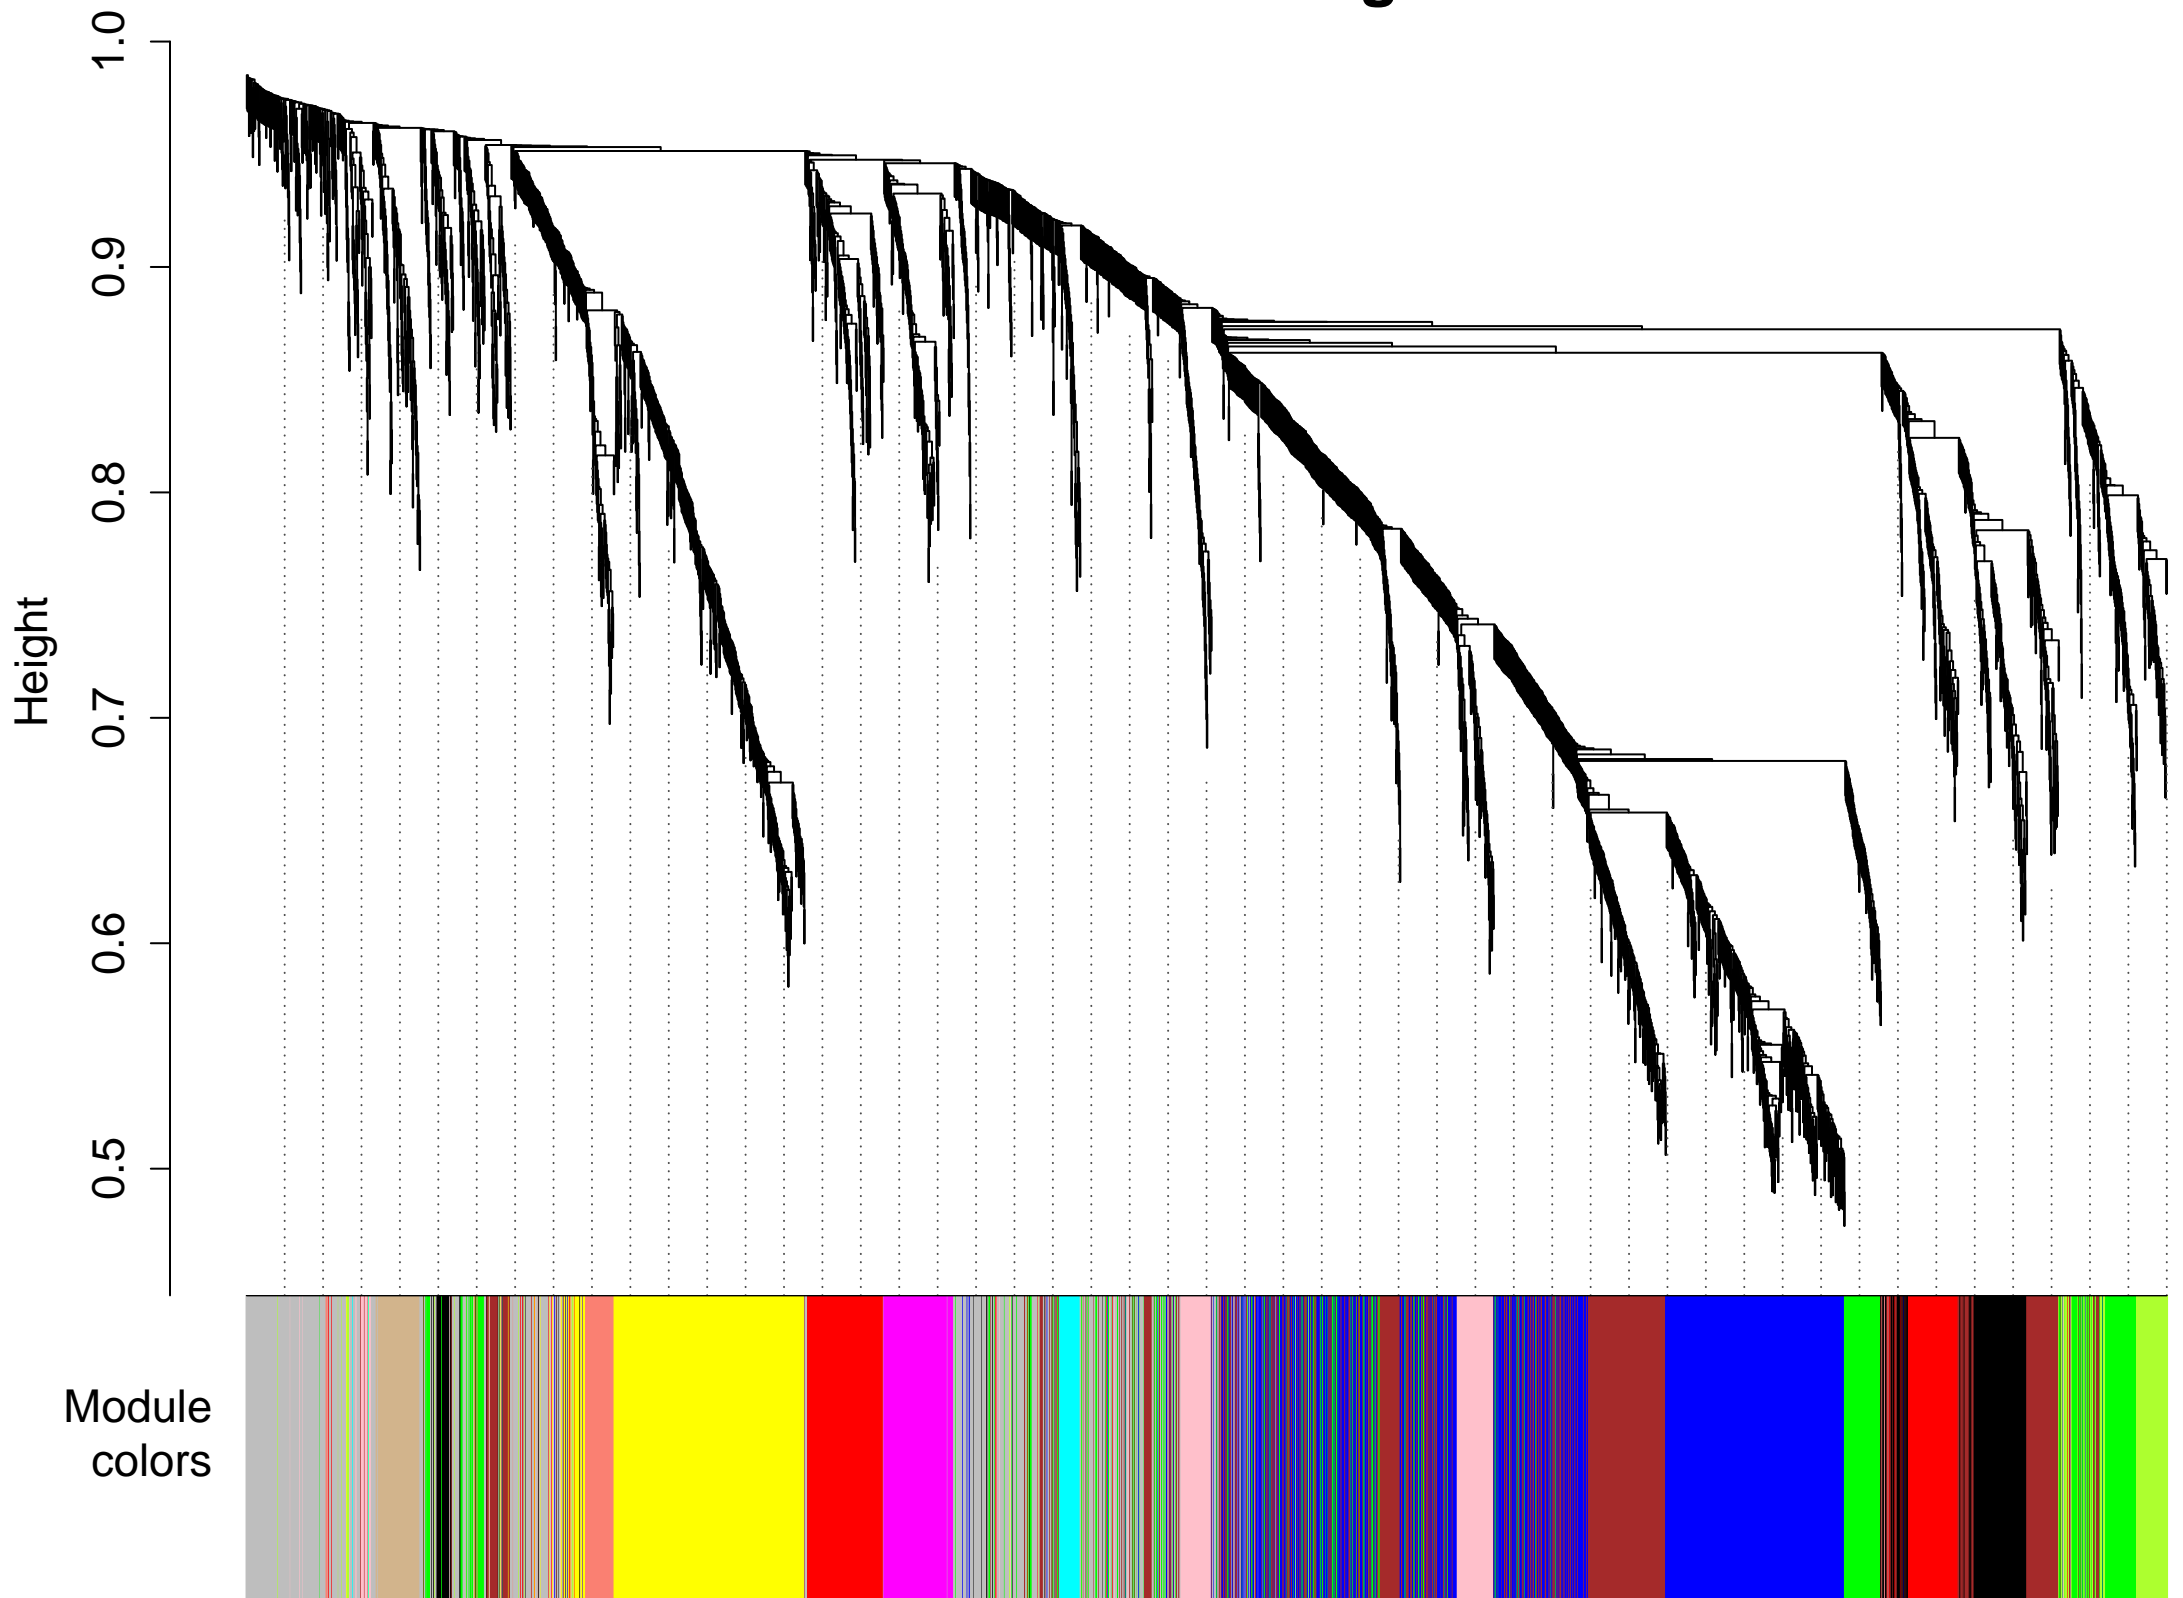

Supplement: Supplemental_Material.tar.gz [file Dendrogram_and_module_colors.pdf › Supplemental_Material/mRNA_modules/Dendrogram_and_module_colors.pdf]

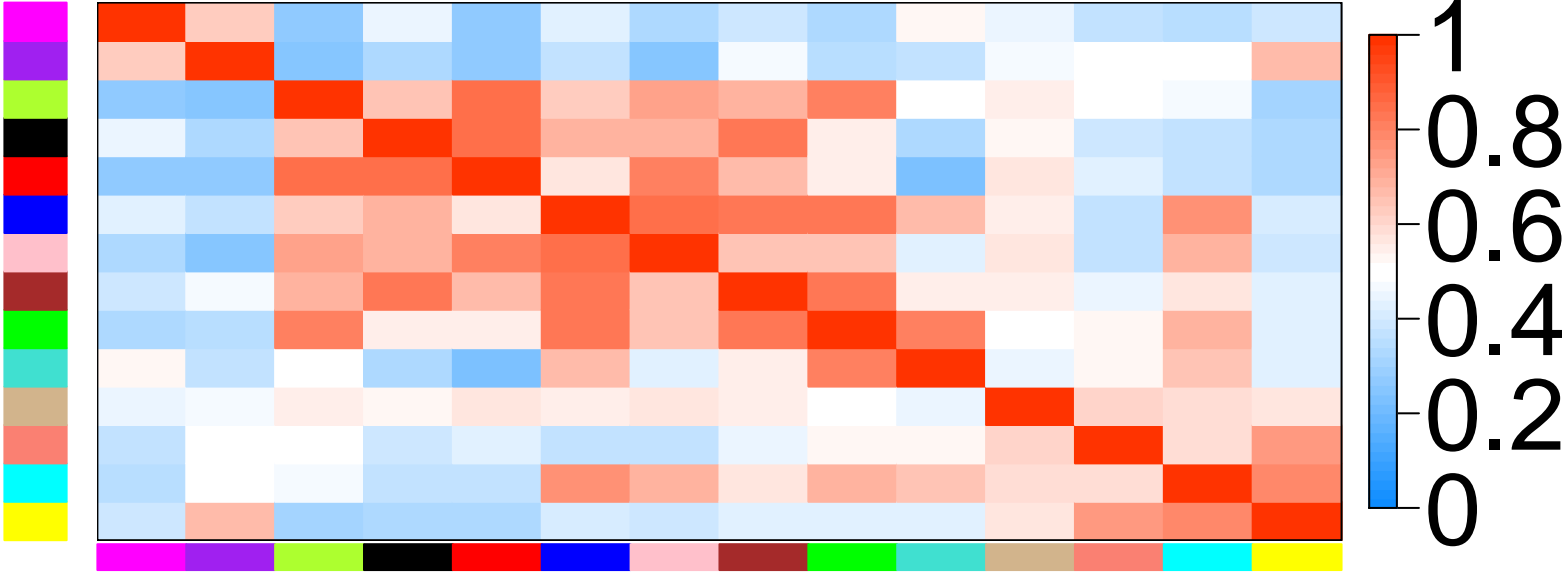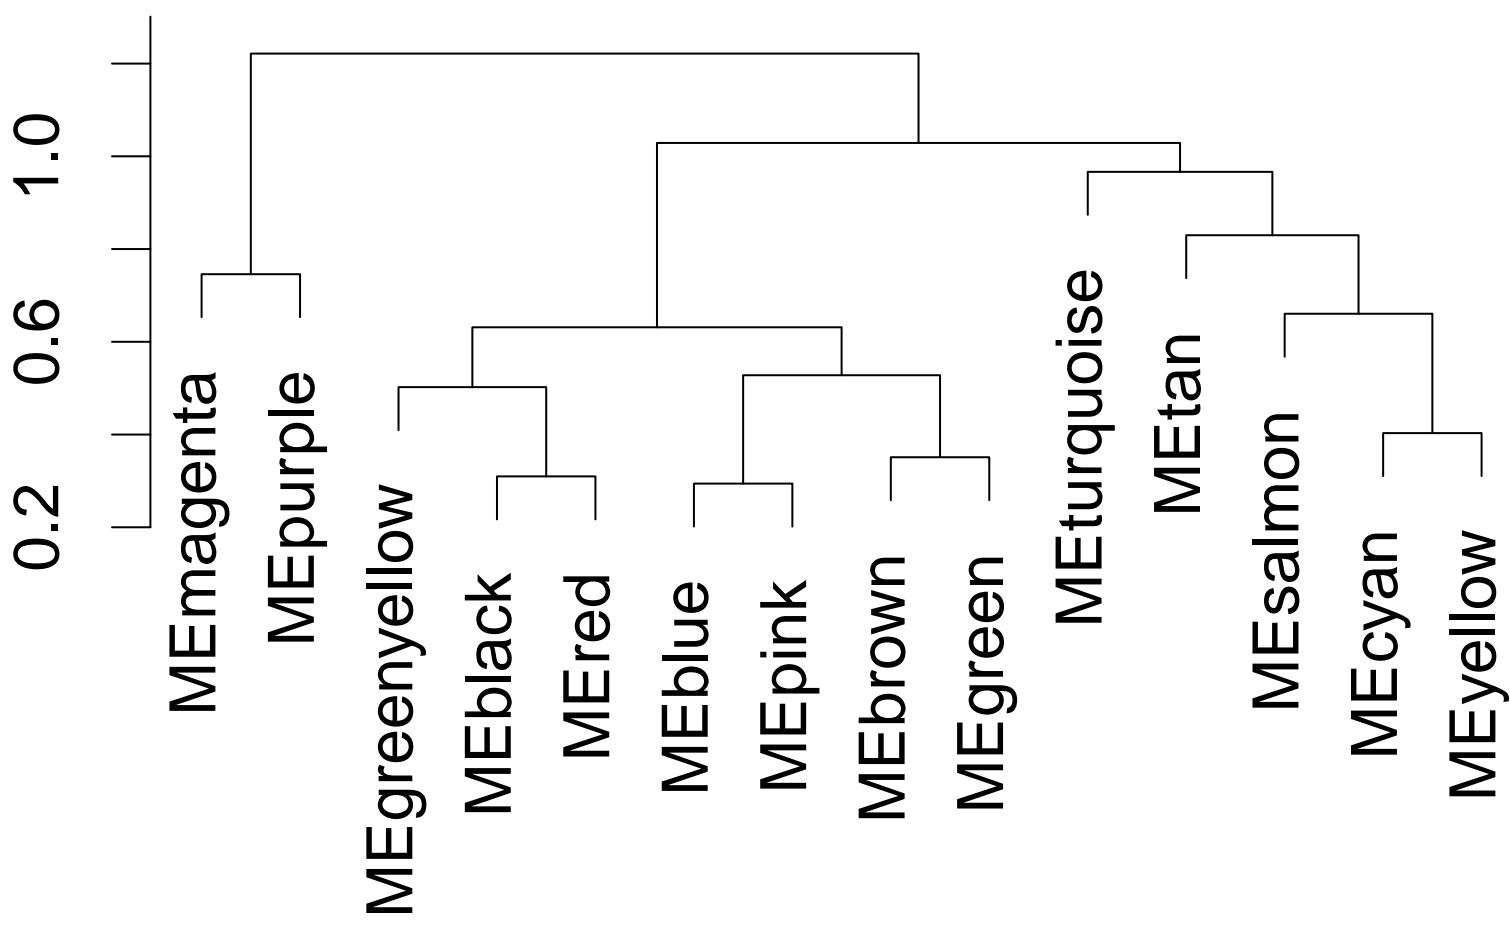

Supplement: Supplemental_Material.tar.gz [file Eigengene_dendrogram_heatmap.pdf › Supplemental_Material/mRNA_modules/Eigengene_dendrogram_heatmap.pdf]
